# Supplementary material for: From serum metabolites to the gut: revealing metabolic clues to susceptibility to subtypes of Crohn’s disease and ulcerative colitis
Source: Frontiers journal article supplement (doi:10.3389/fendo.2024.1375896), 2024-08-08

Batch 2 : Tryptophan on Crohn's disease of colon

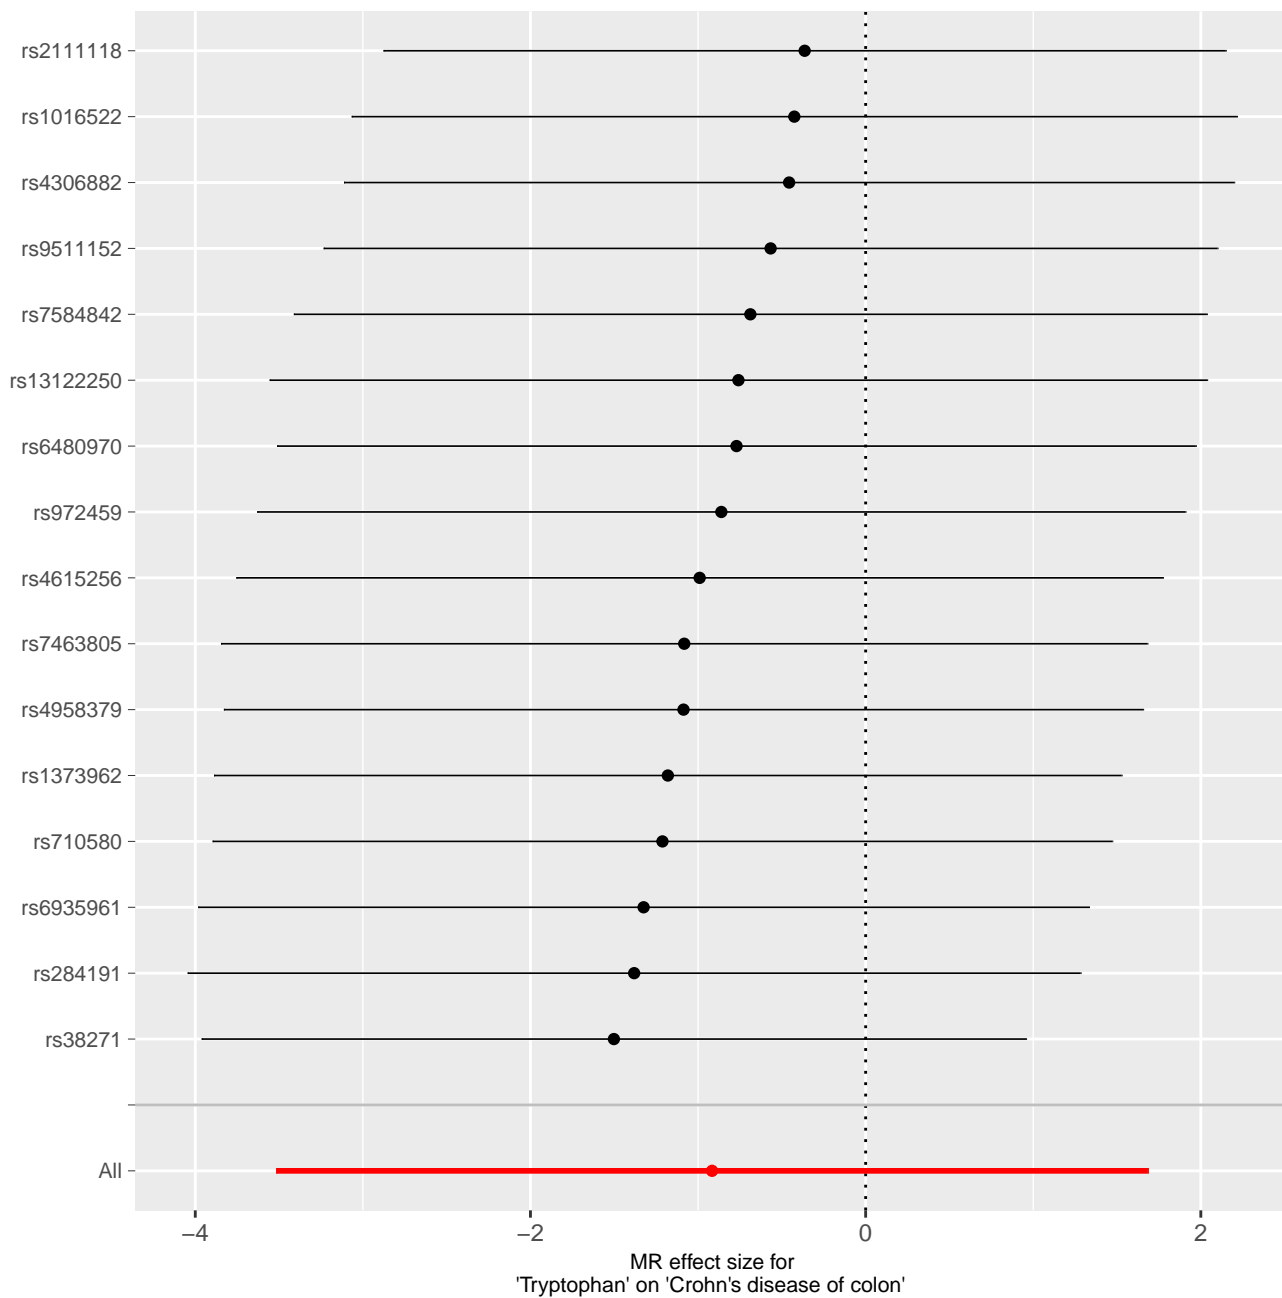

Batch 4 : Leucine on Crohn's disease of colon

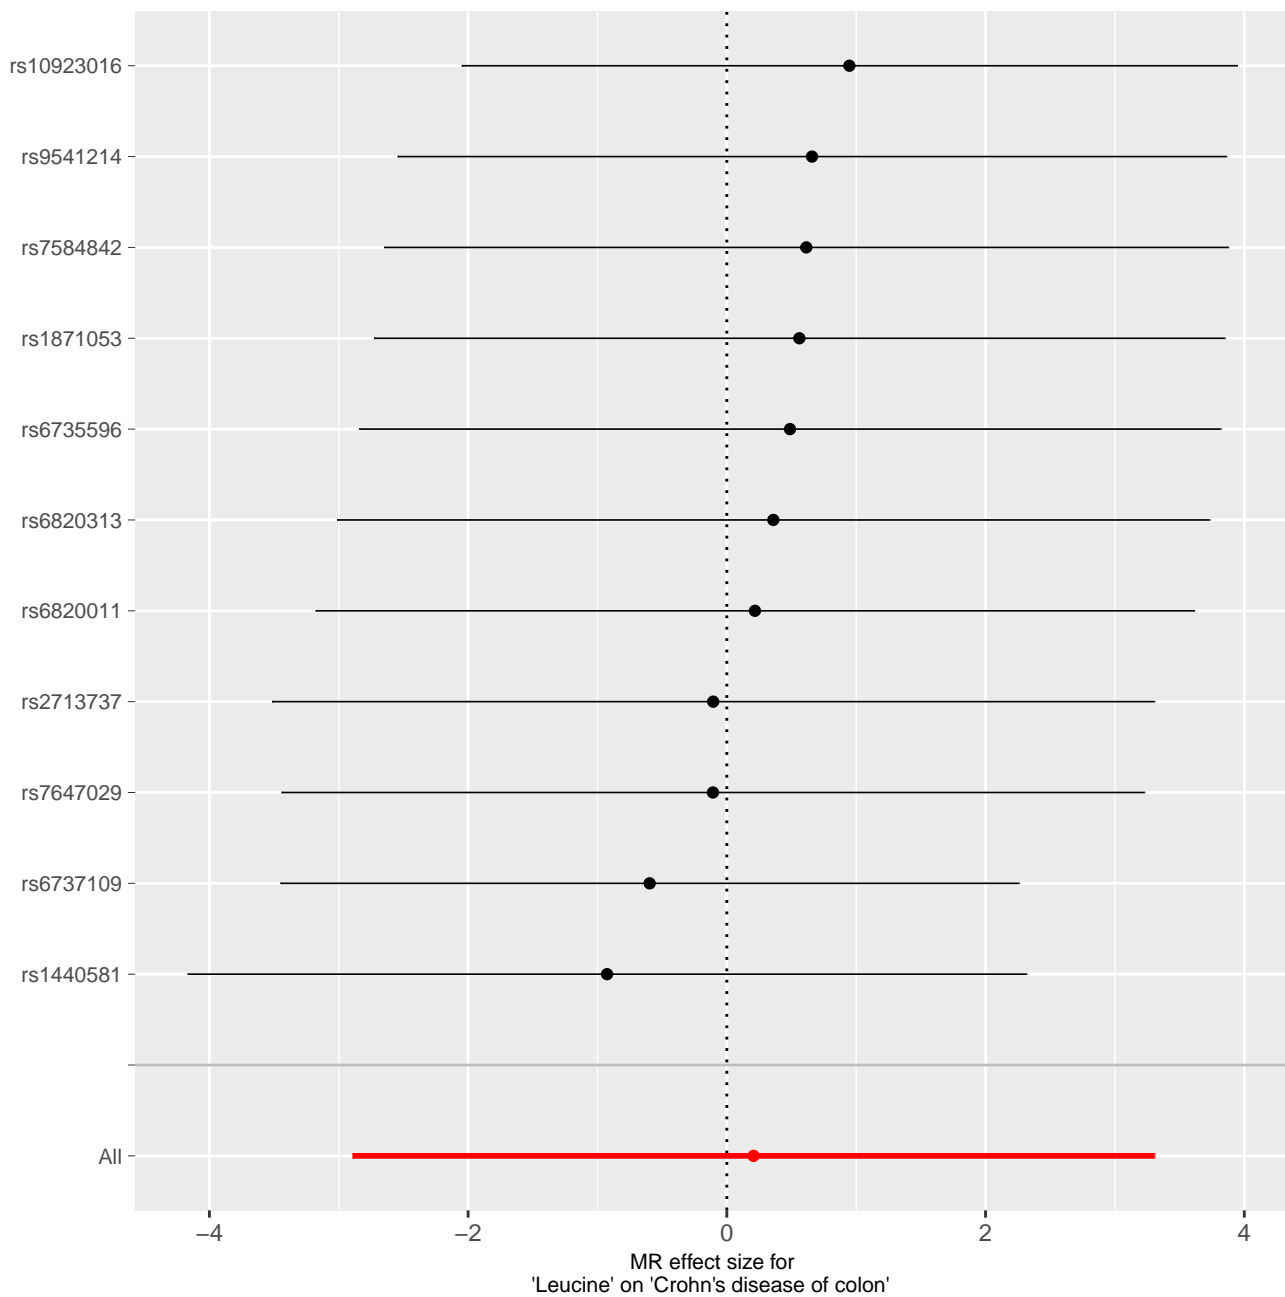

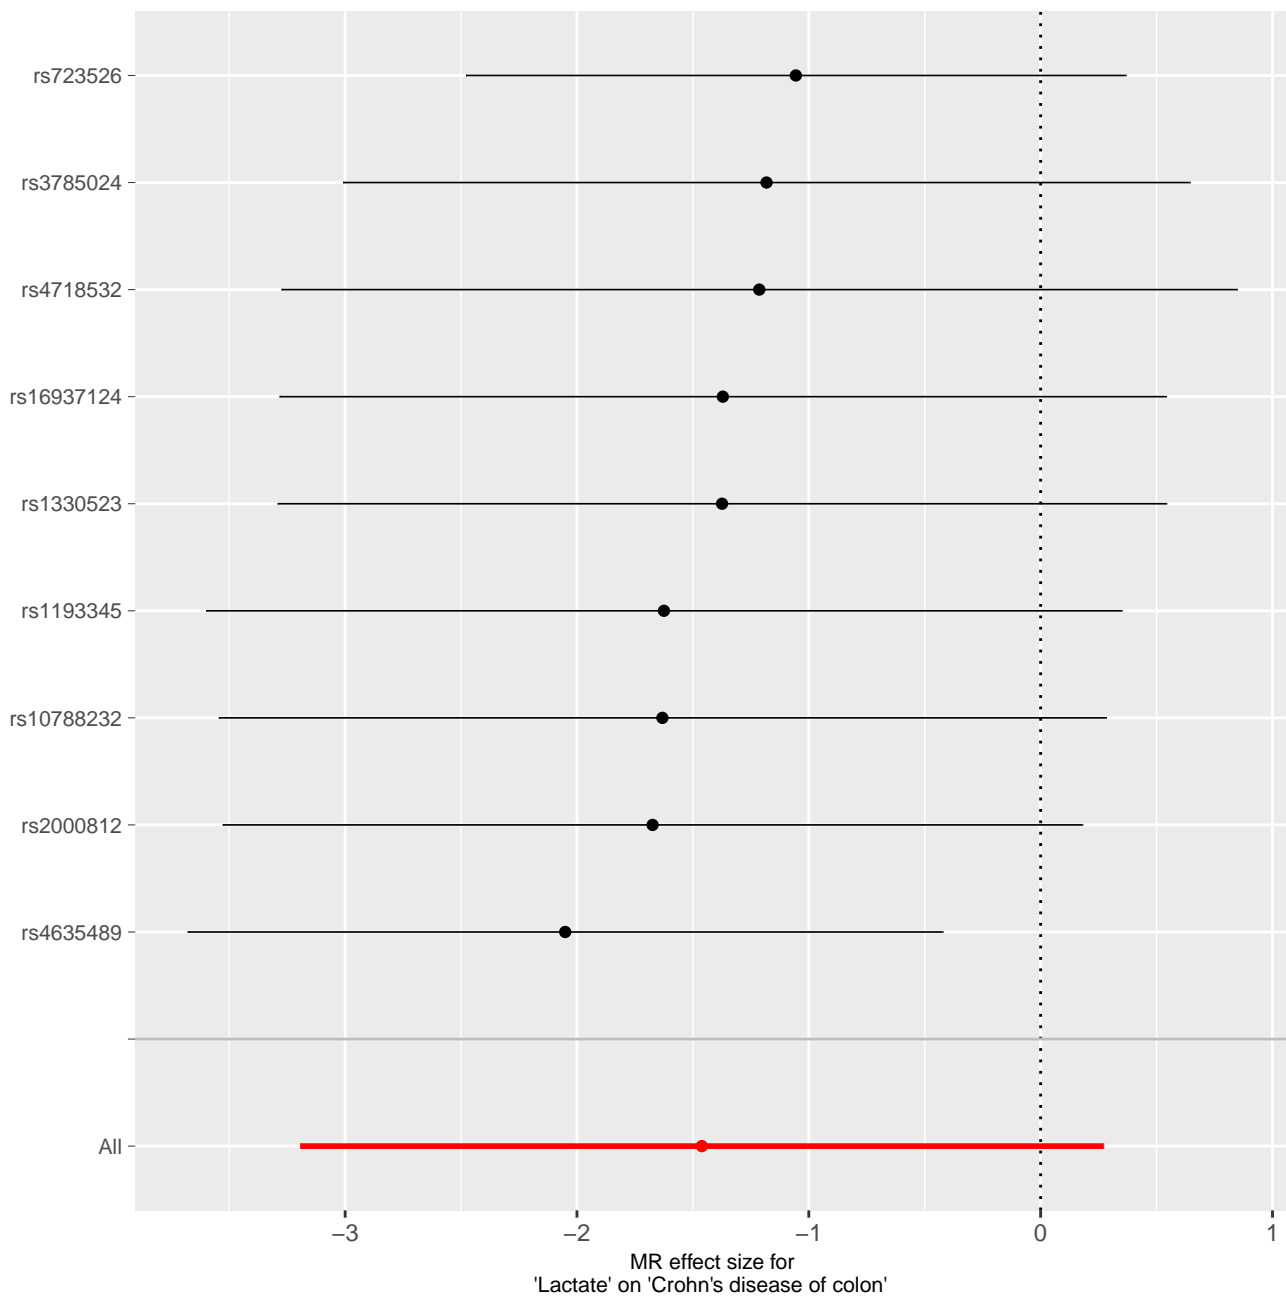

Batch 9 : 3-hydroxybutyrate (BHBA) on Crohn's disease of colon

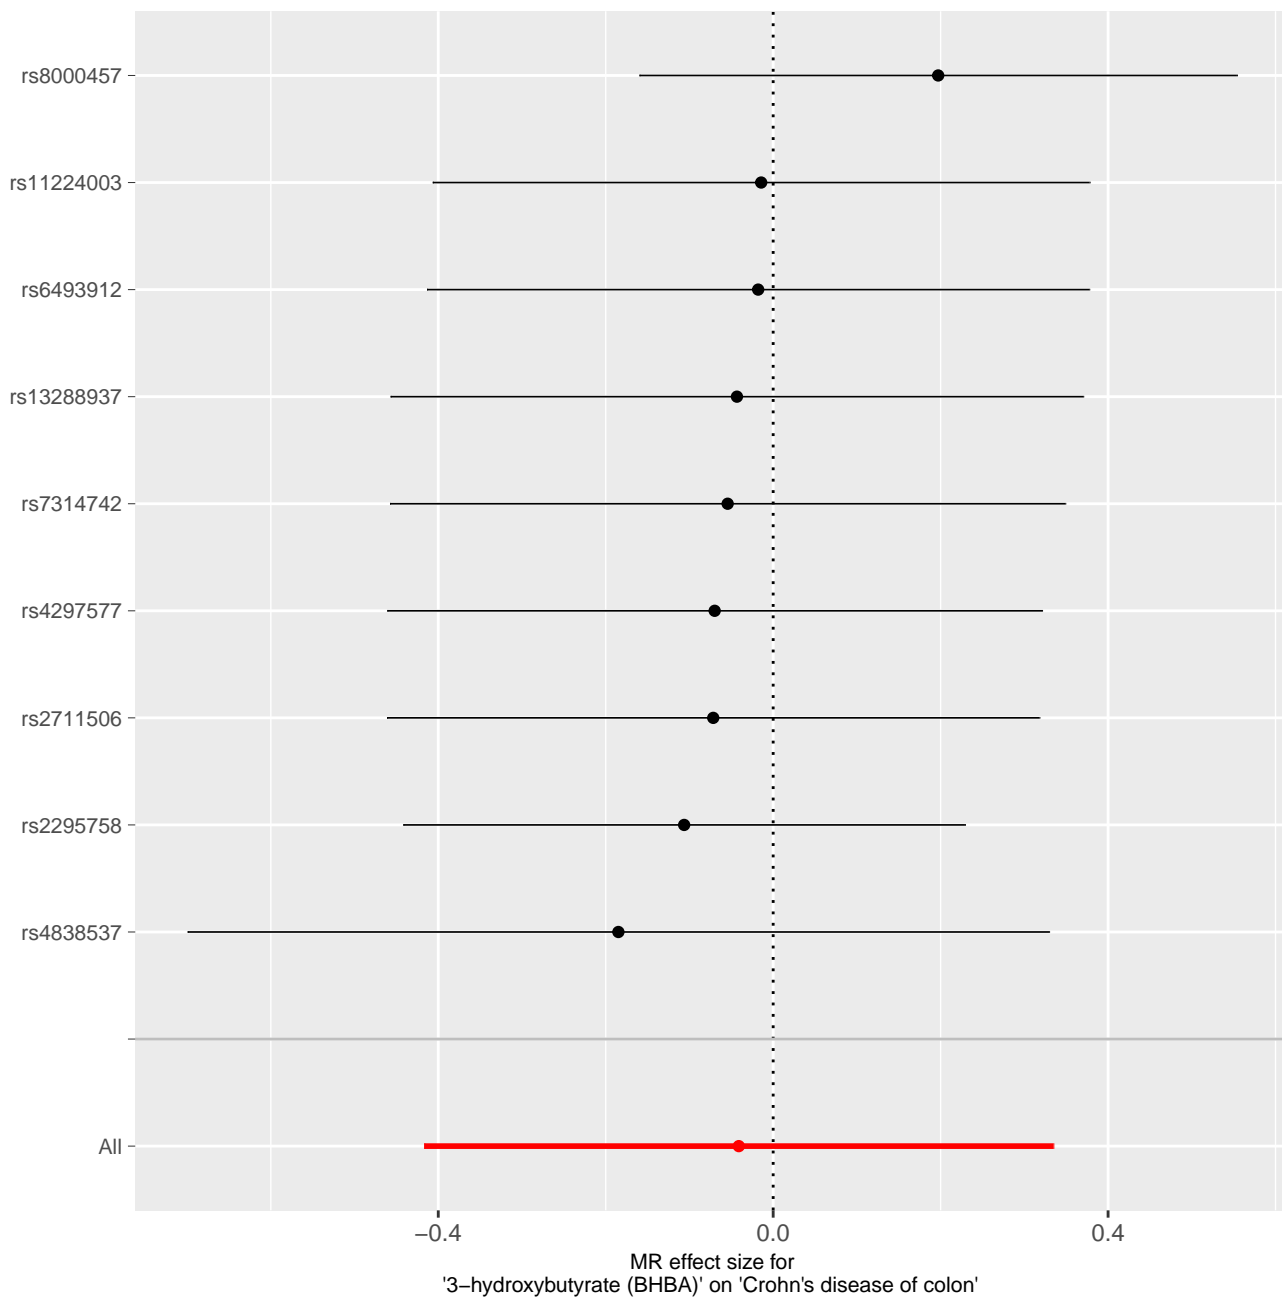

rs12091176

rs526744

rs12426131

rs7790791

All

MR effect size for  
'Arabinose' on 'Crohn's disease of colon'

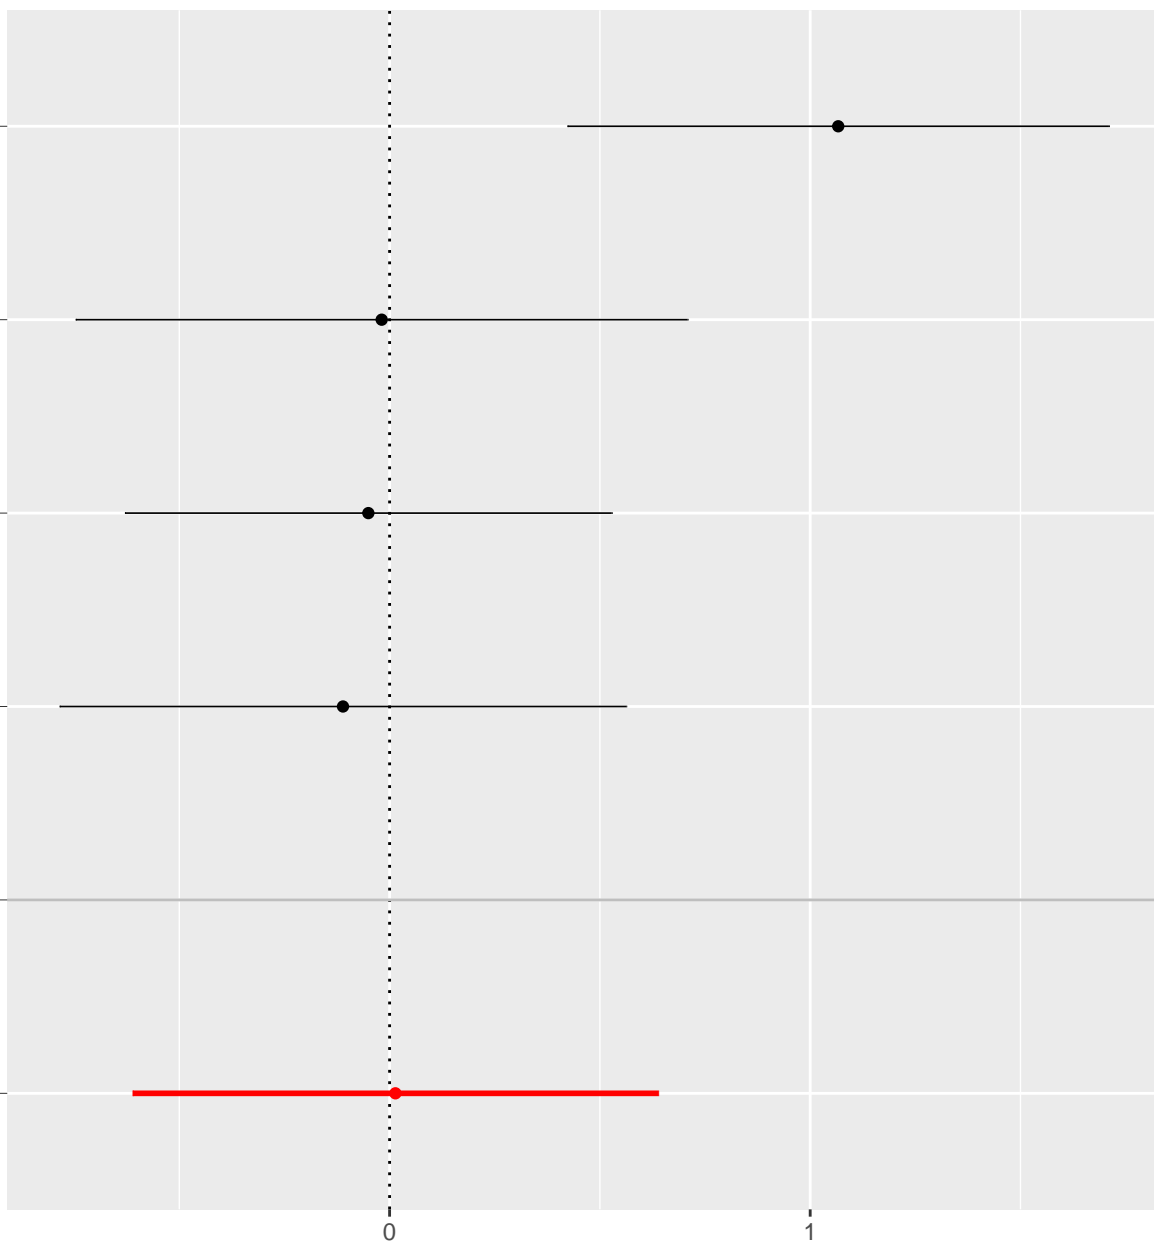

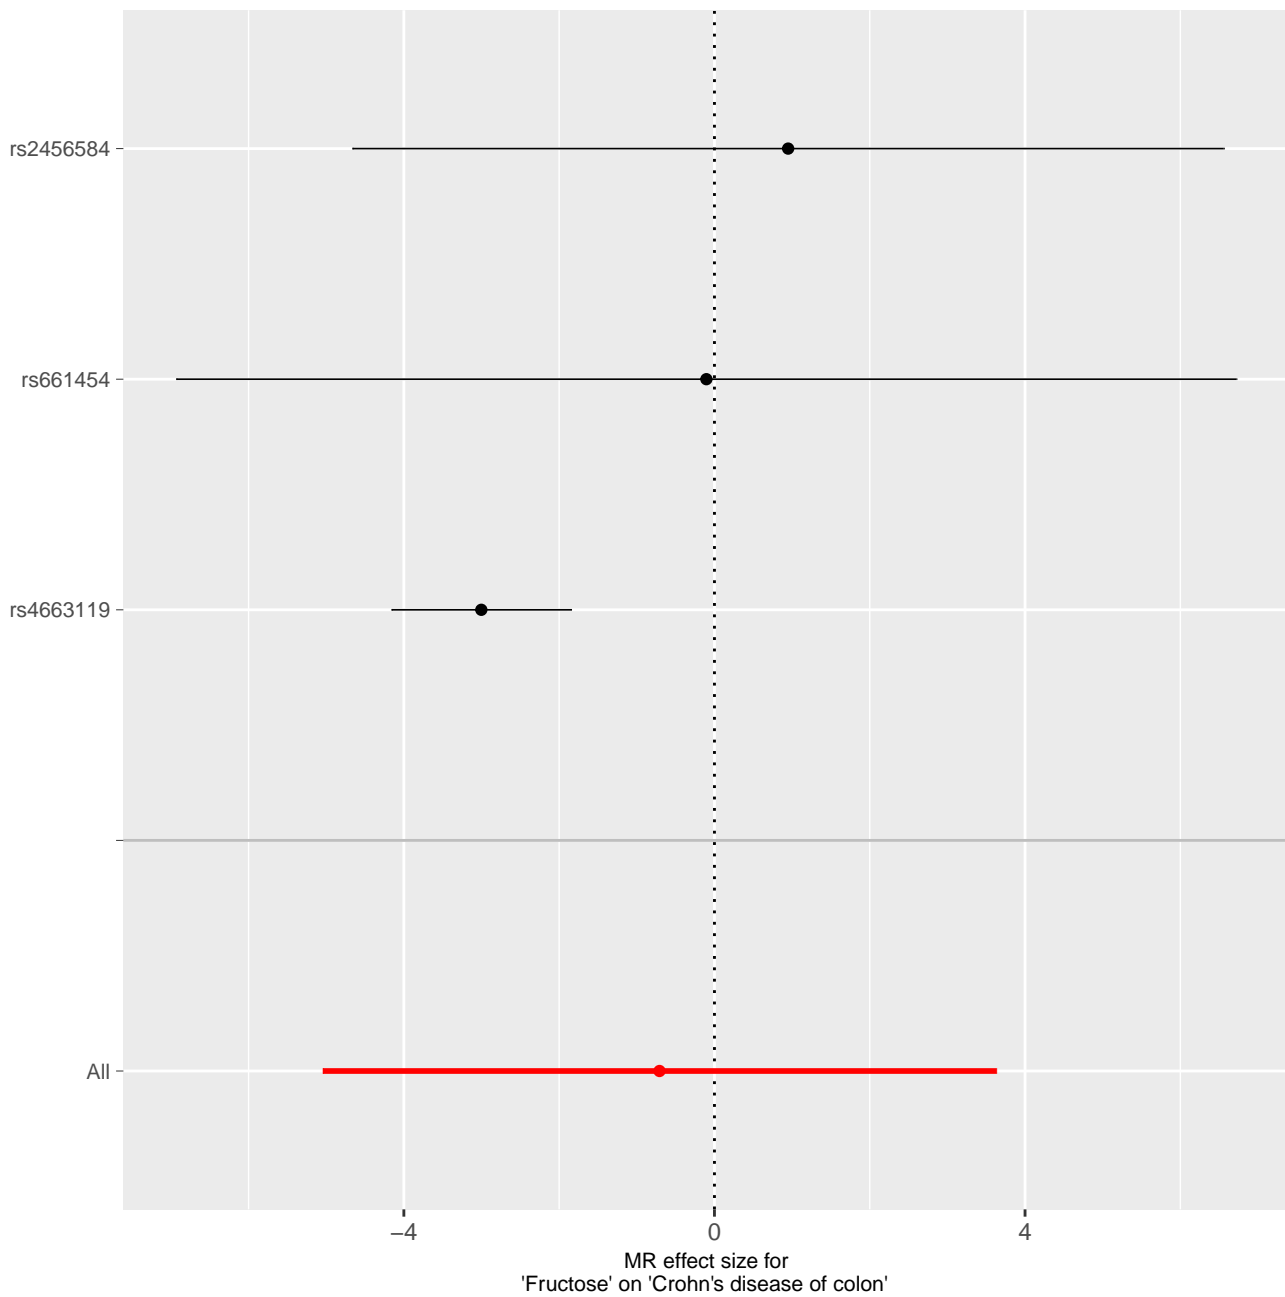

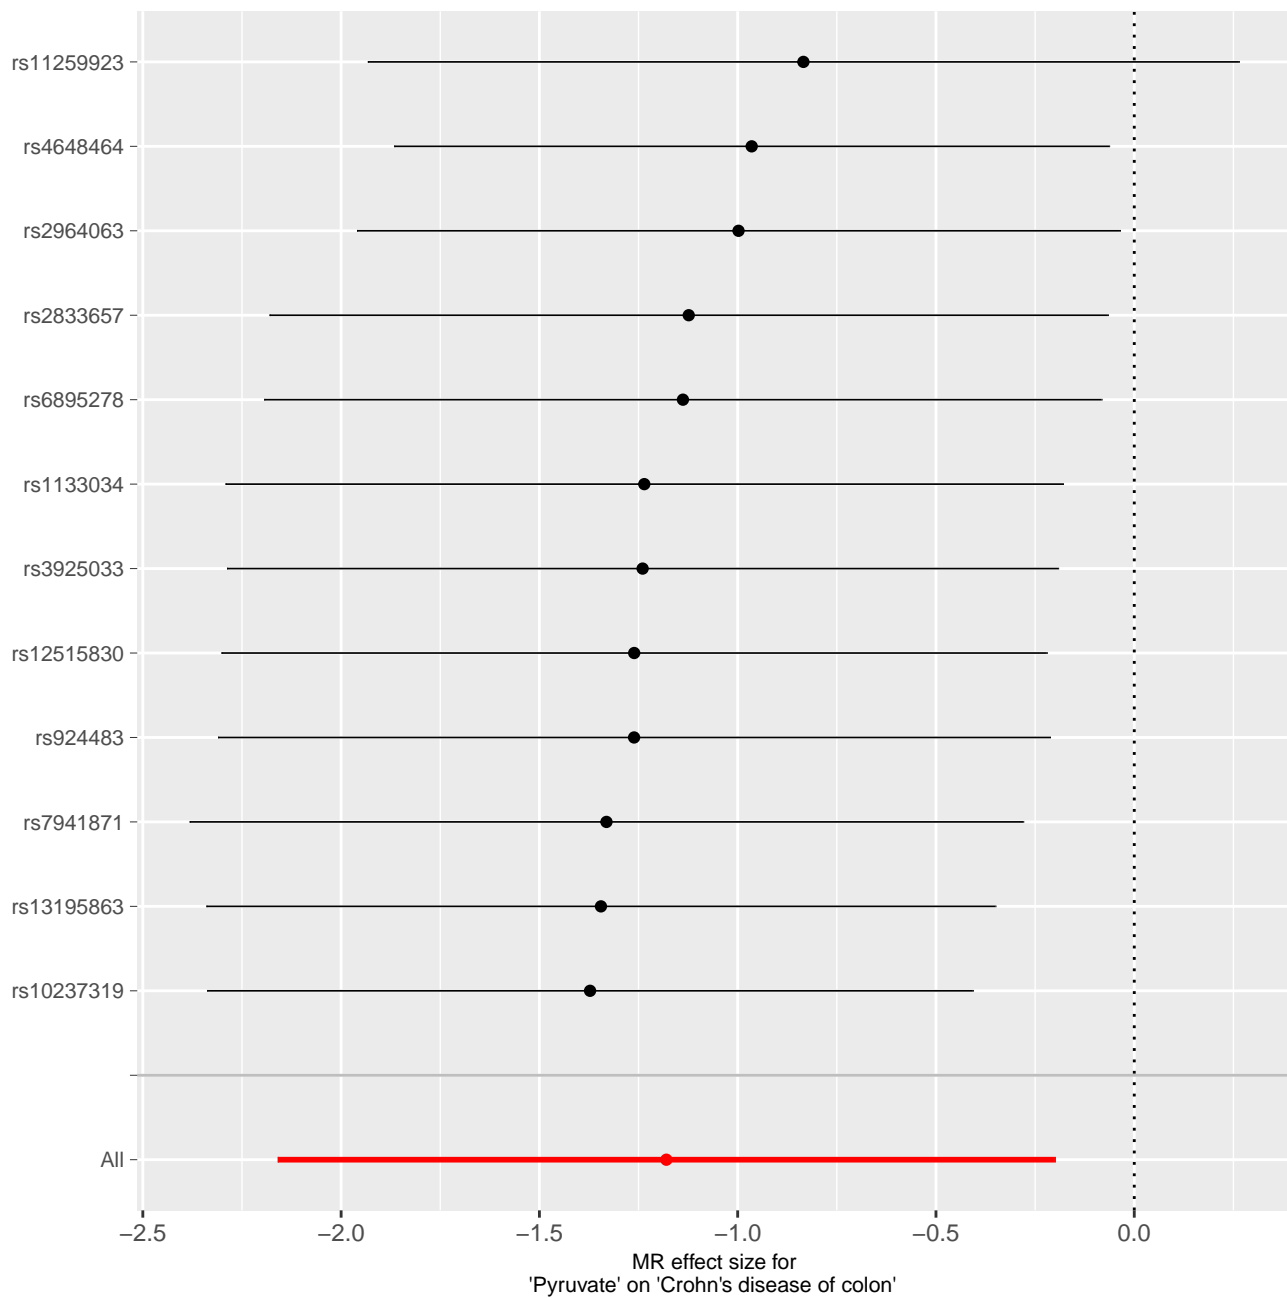

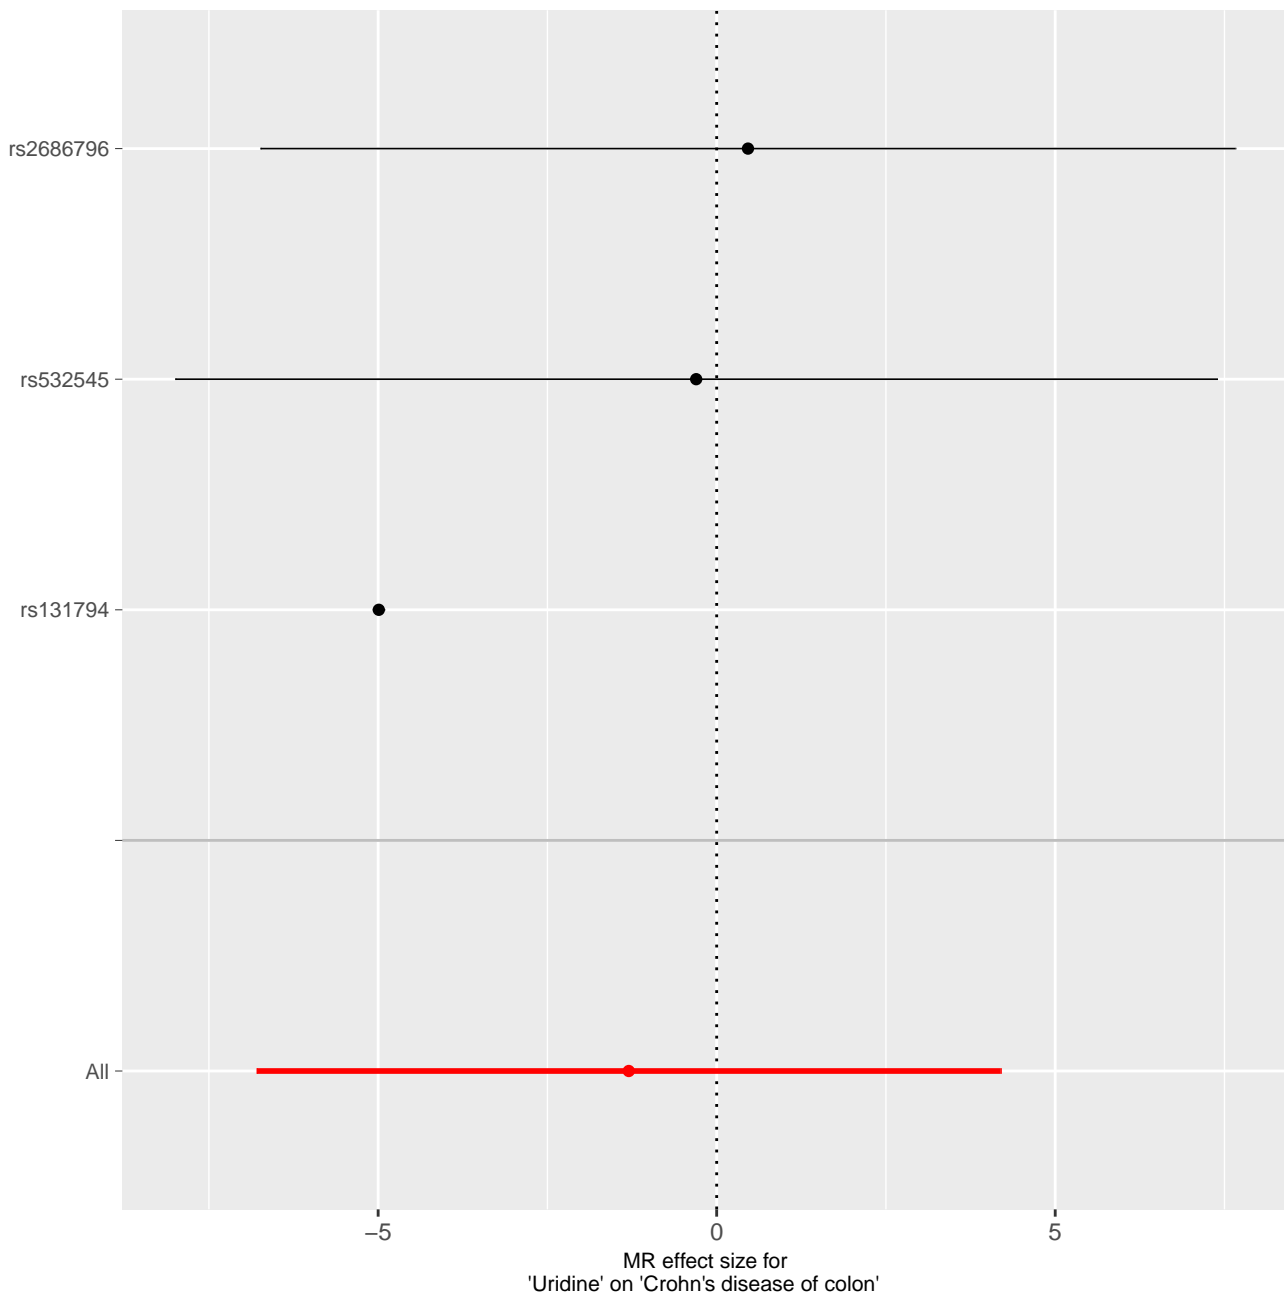



Batch 15 : Linoleate (18:2n6) on Crohn's disease of colon

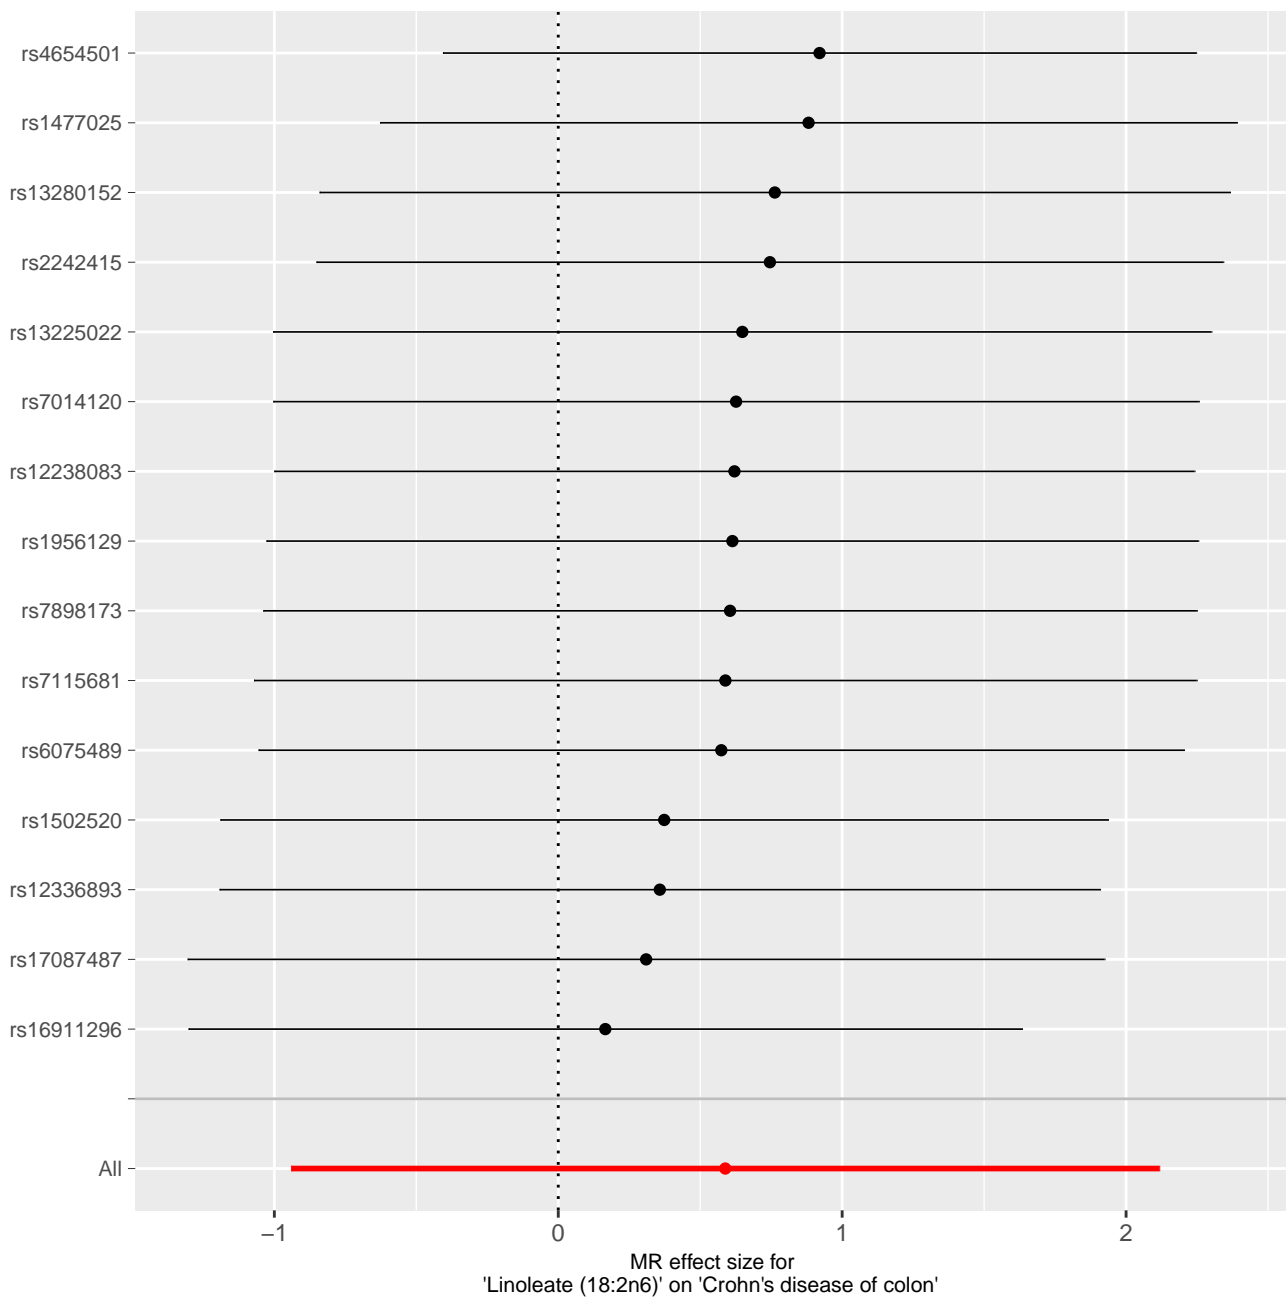

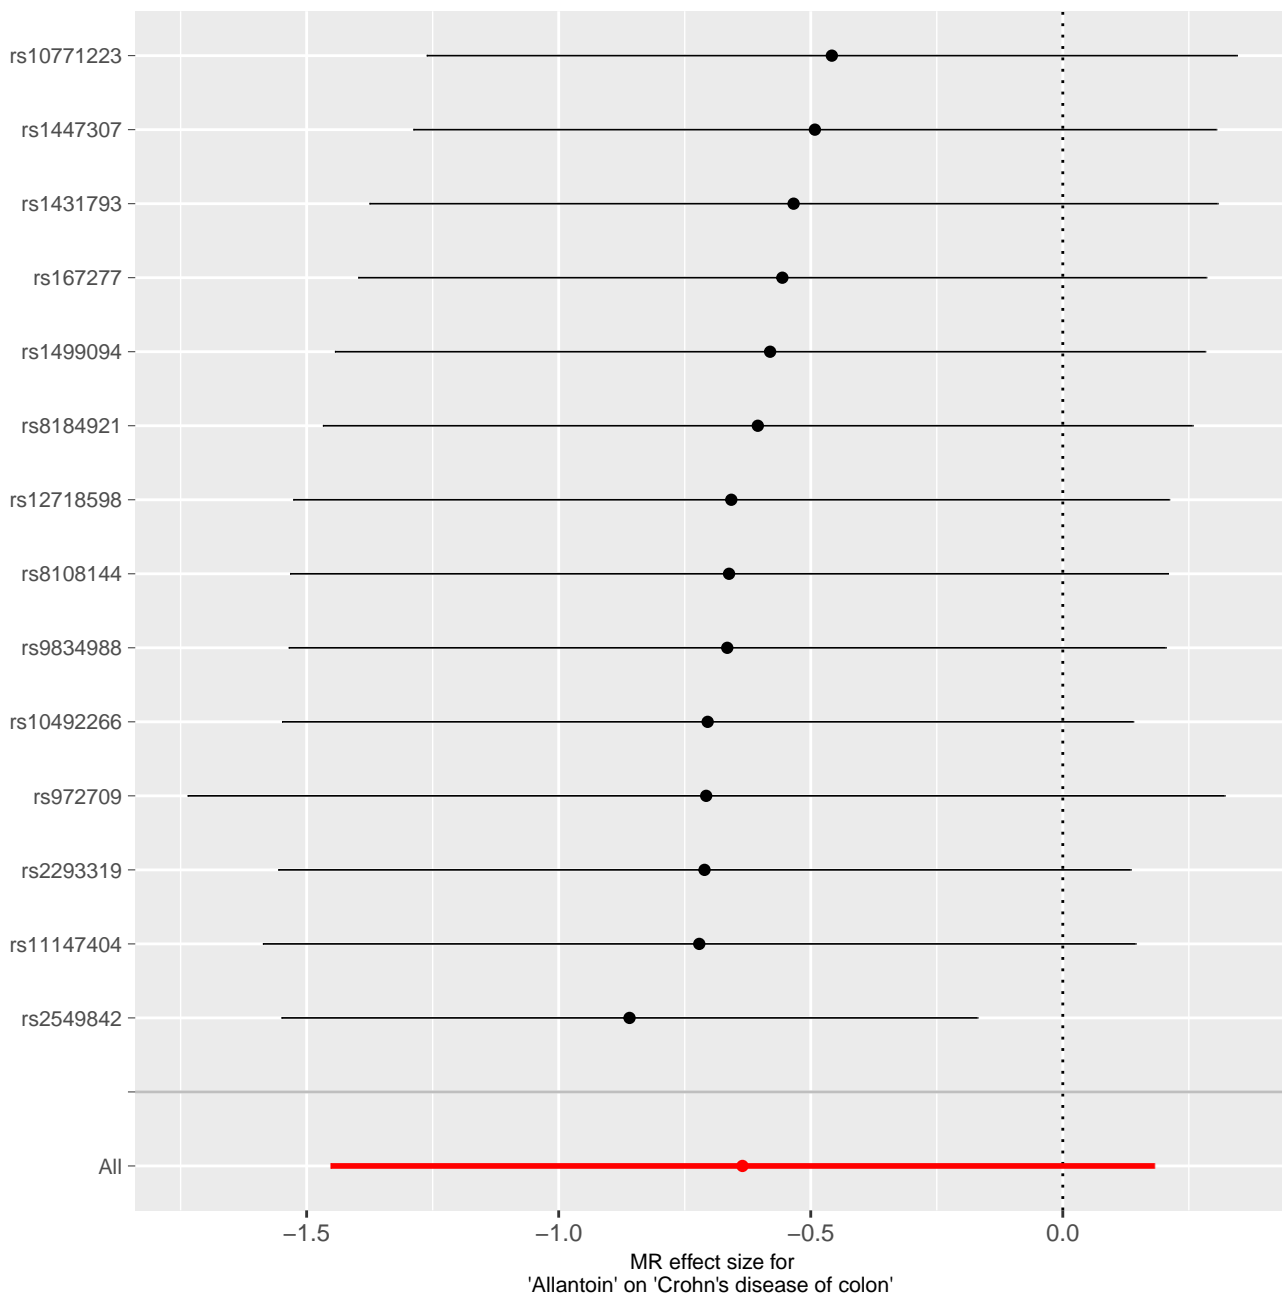

Batch 21 : Isoleucine on Crohn's disease of colon

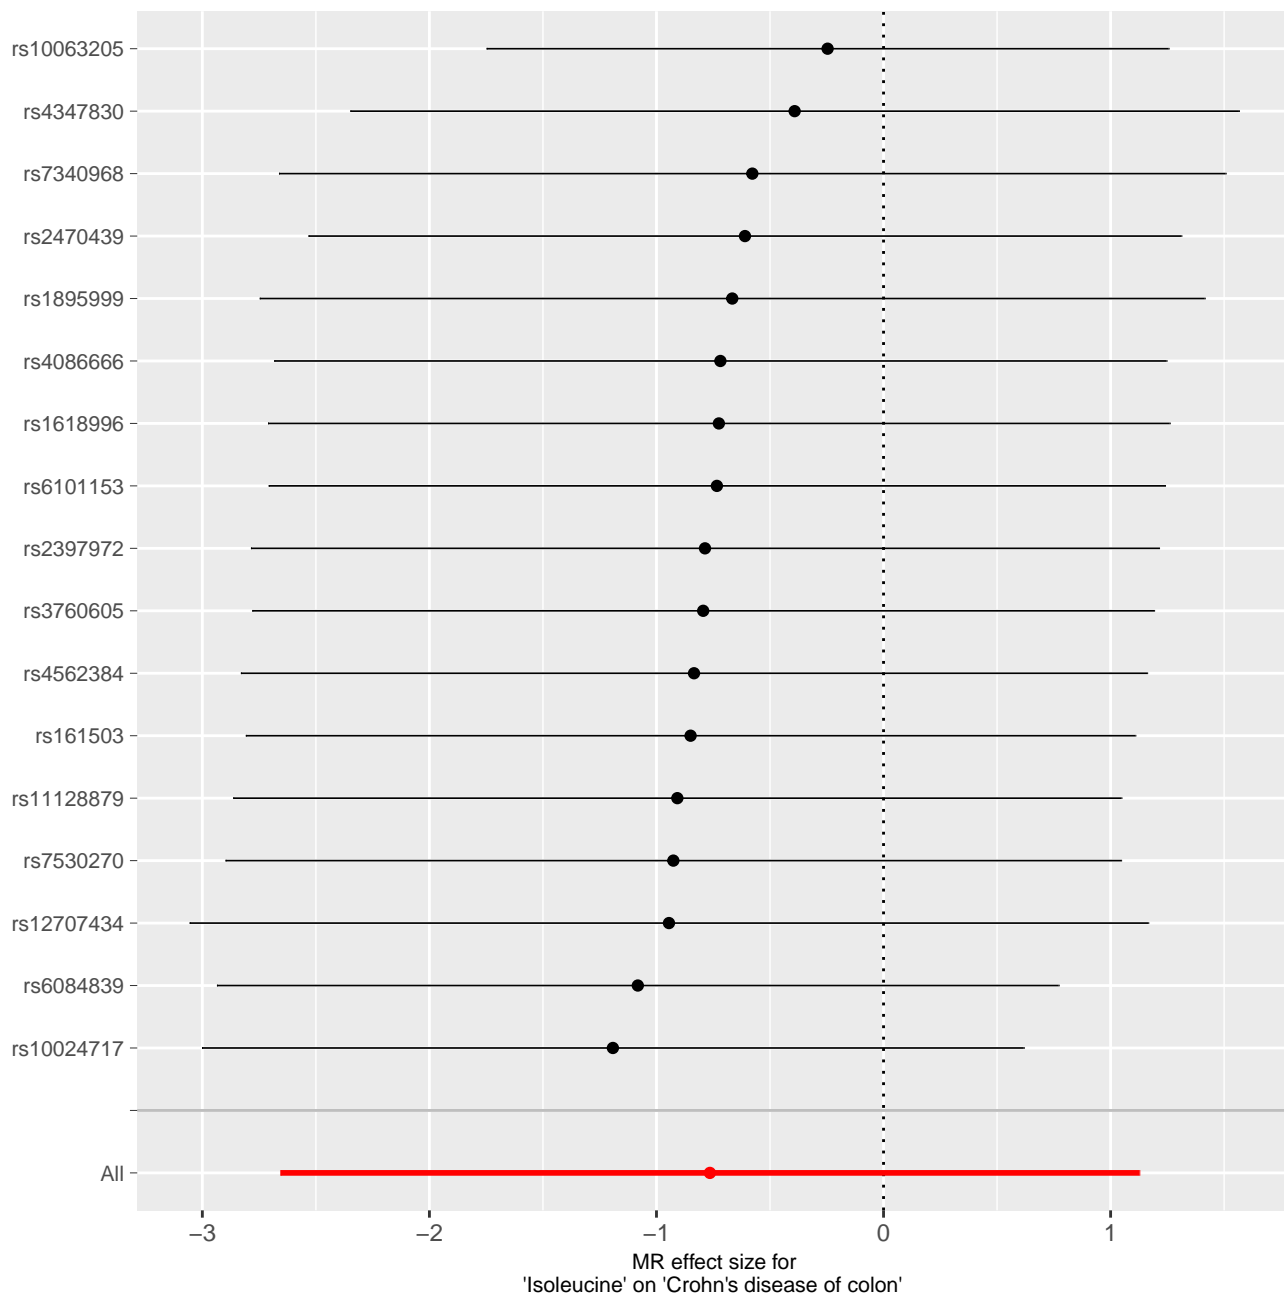

Batch 22 : Threonine on Crohn's disease of colon

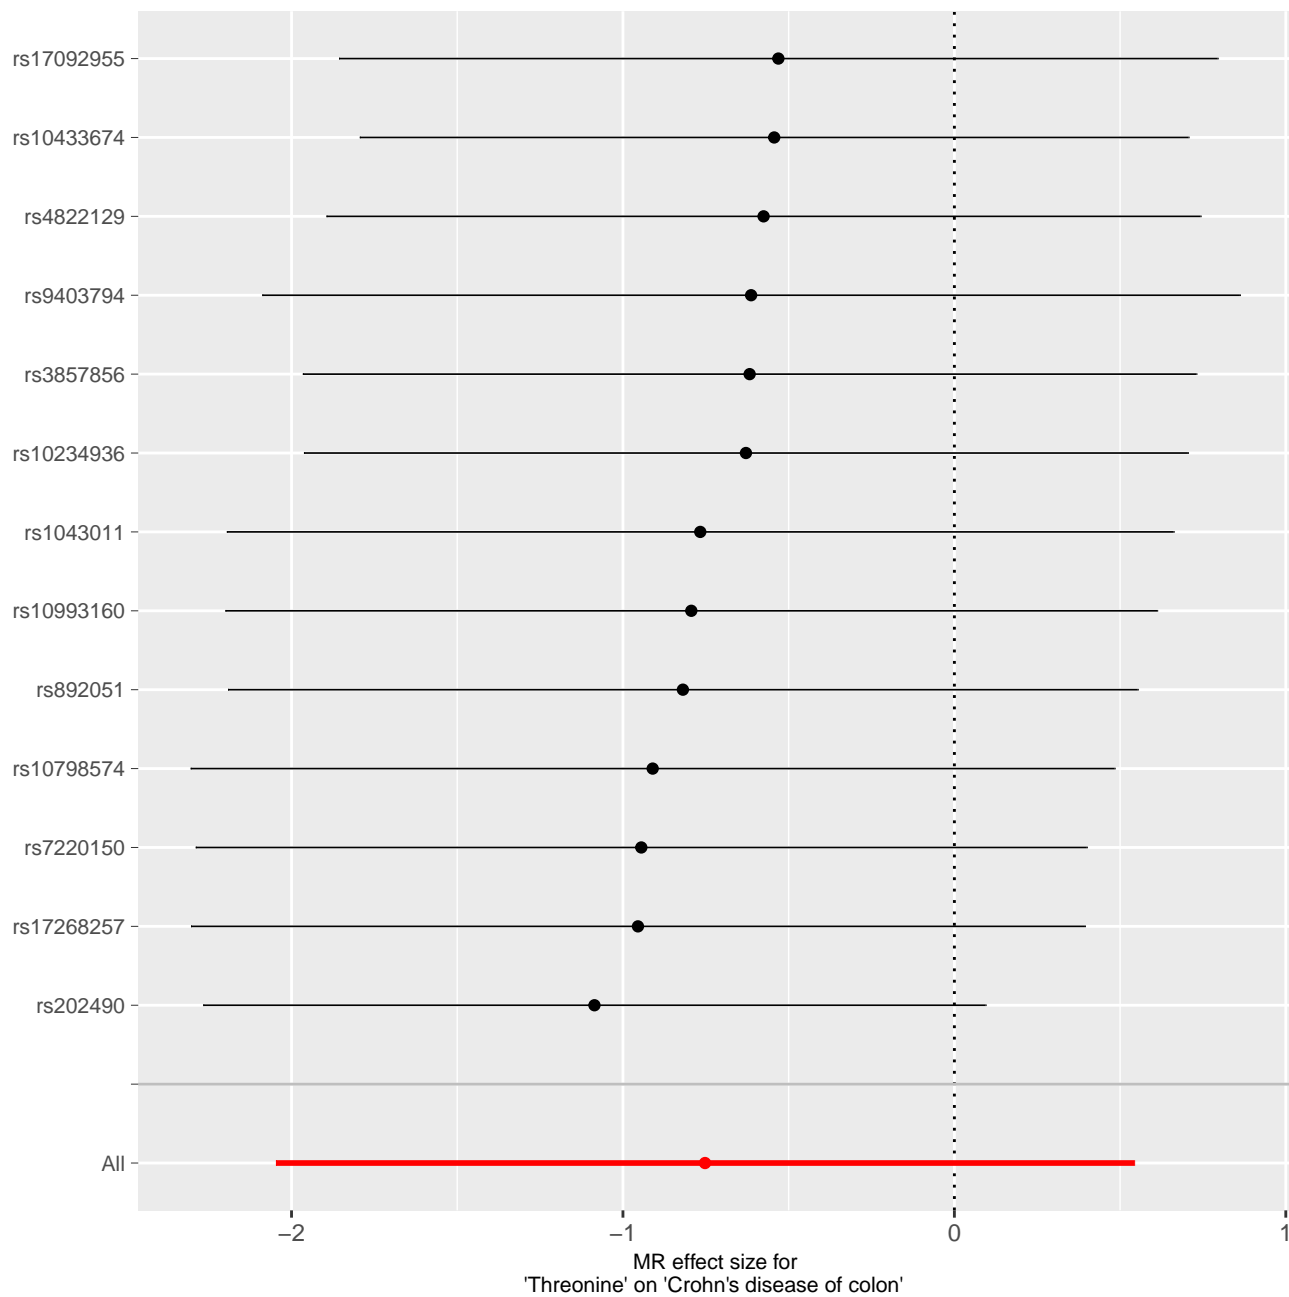

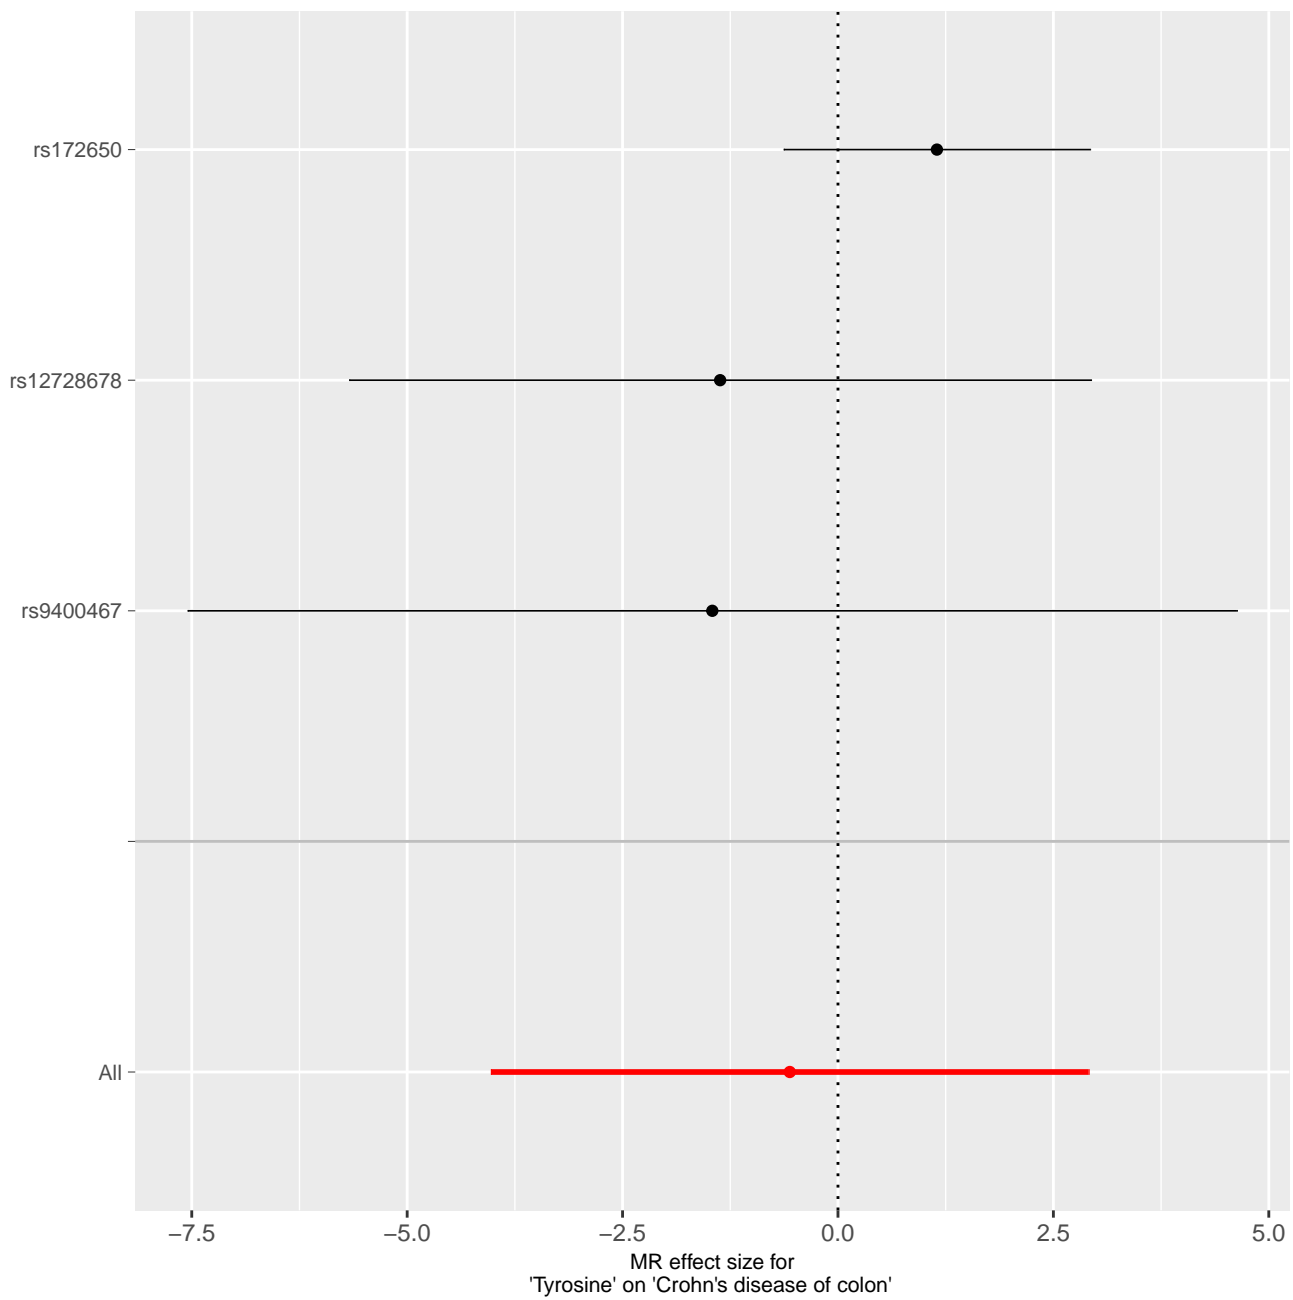

Batch 32 : Myristate (14:0) on Crohn's disease of colon

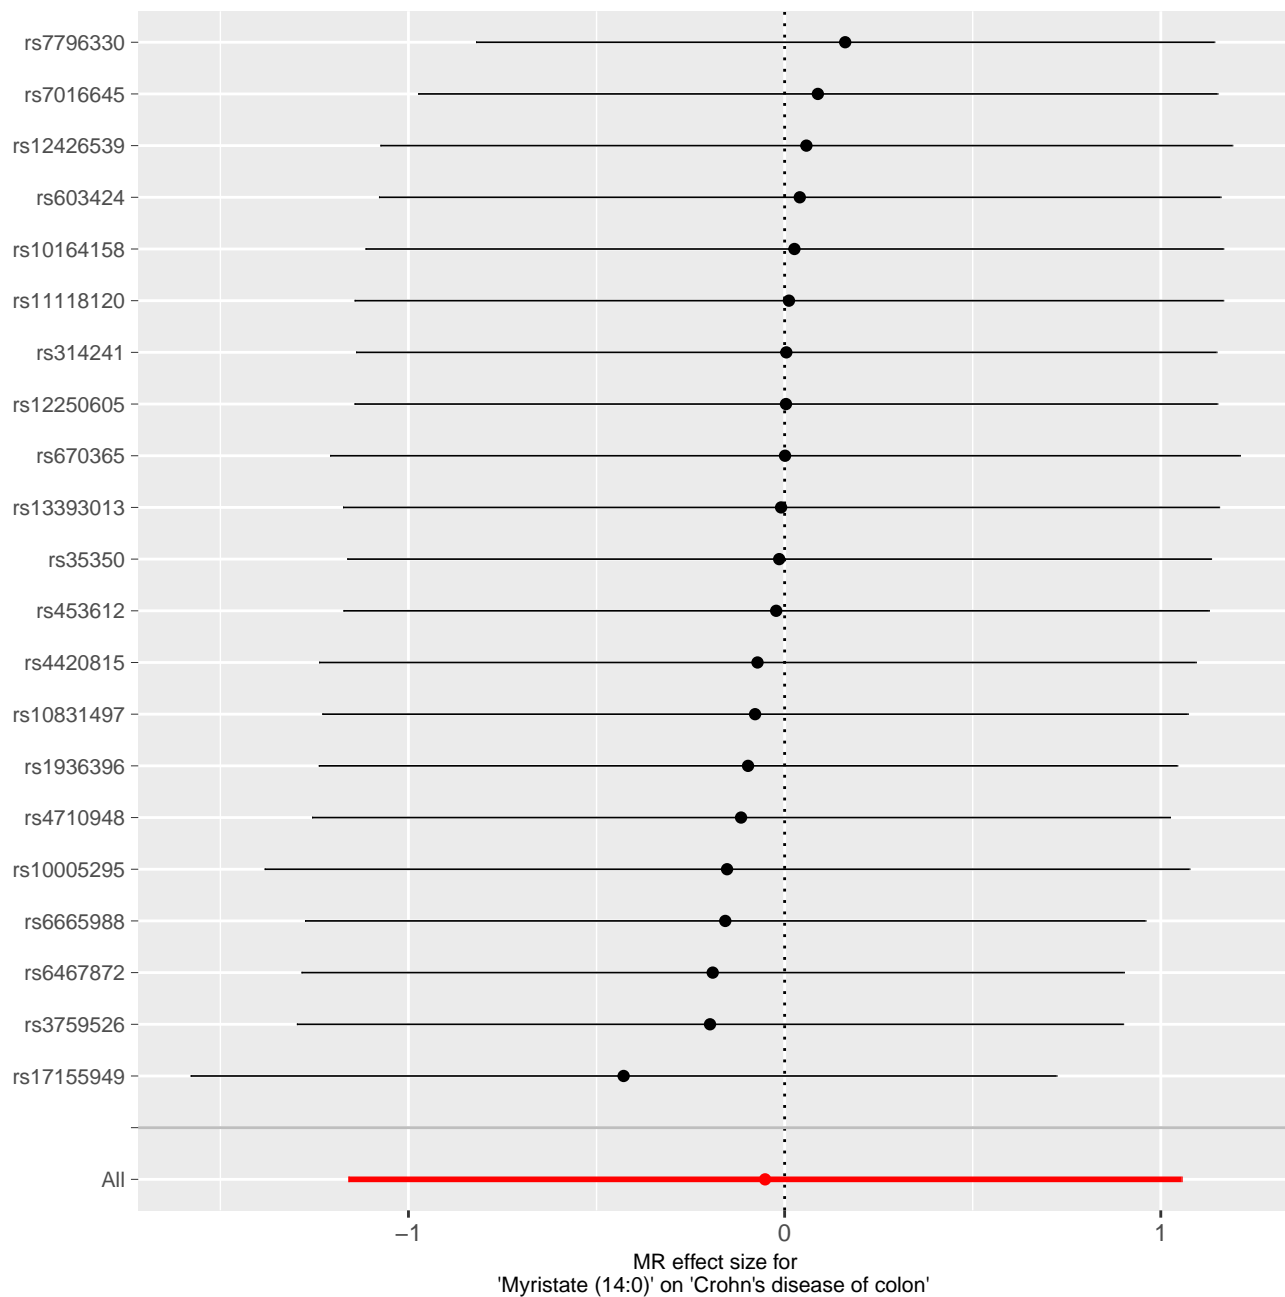

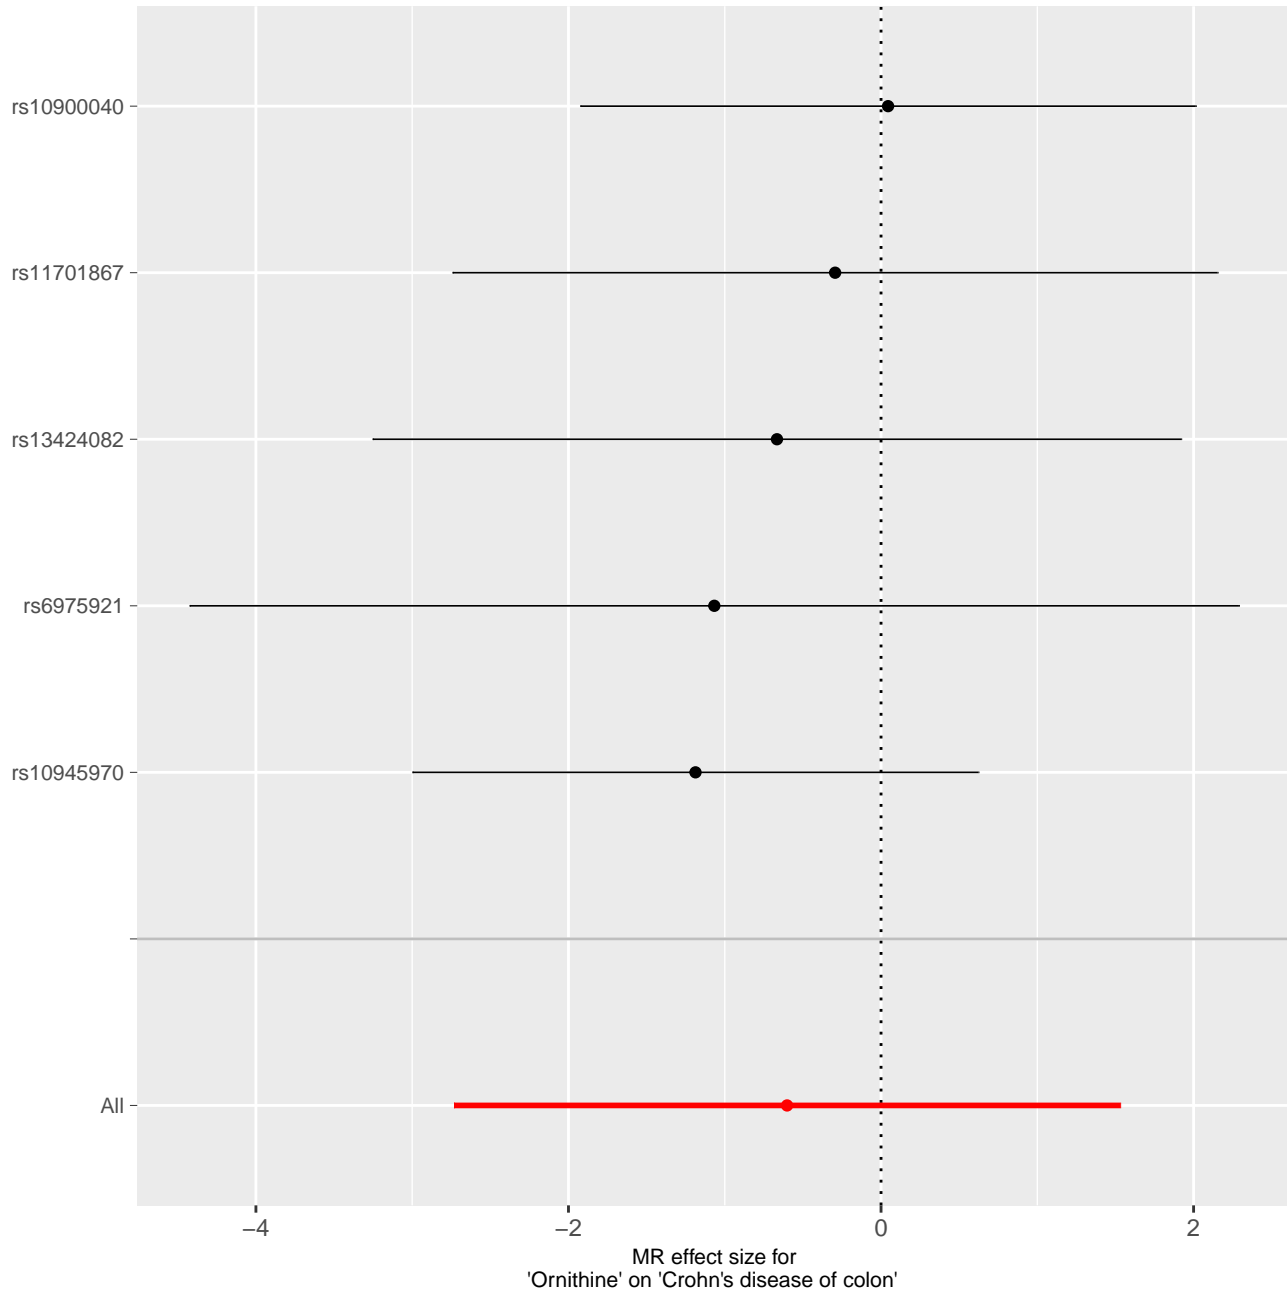

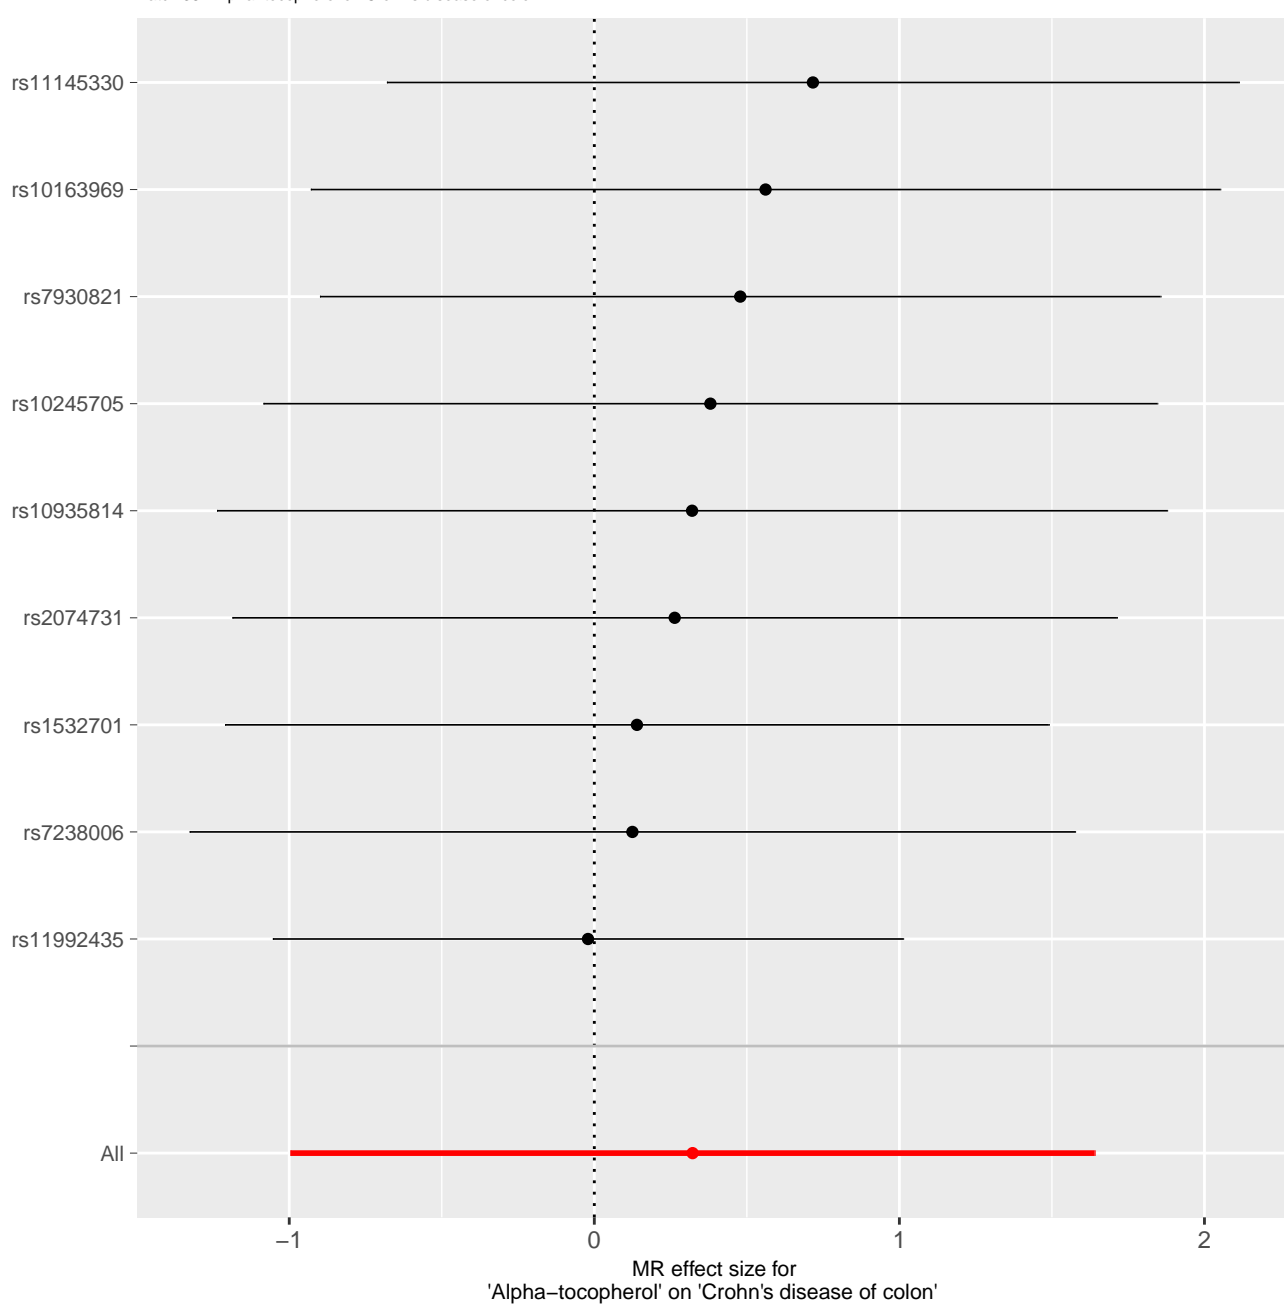



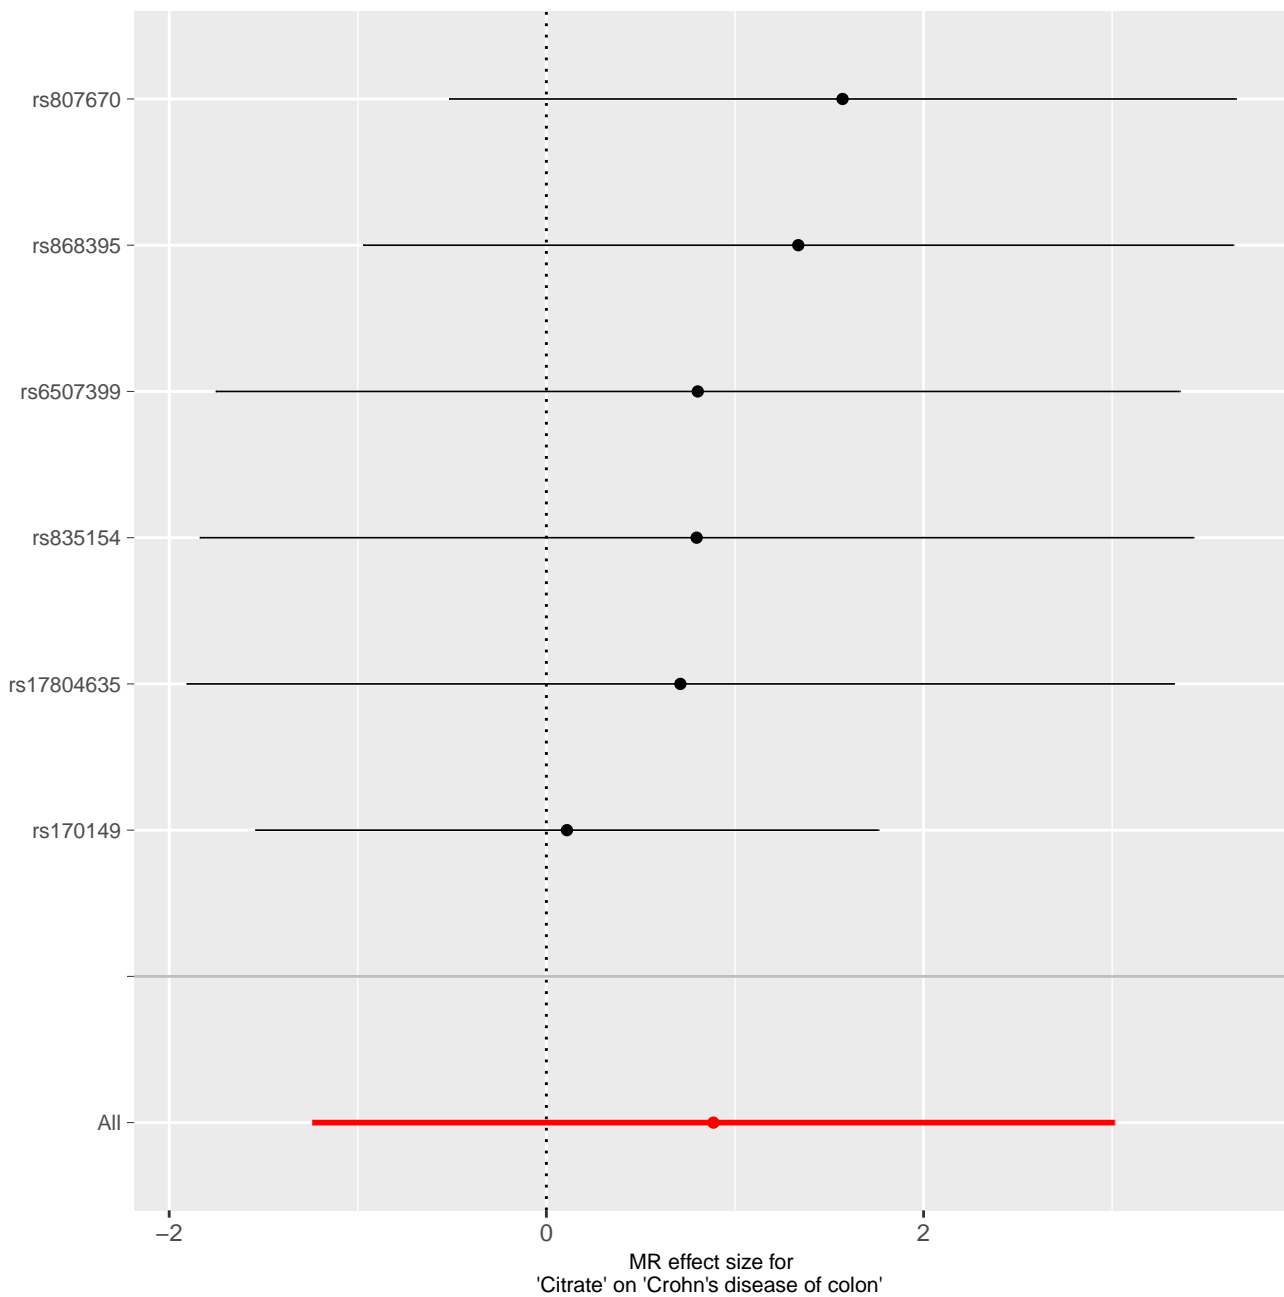

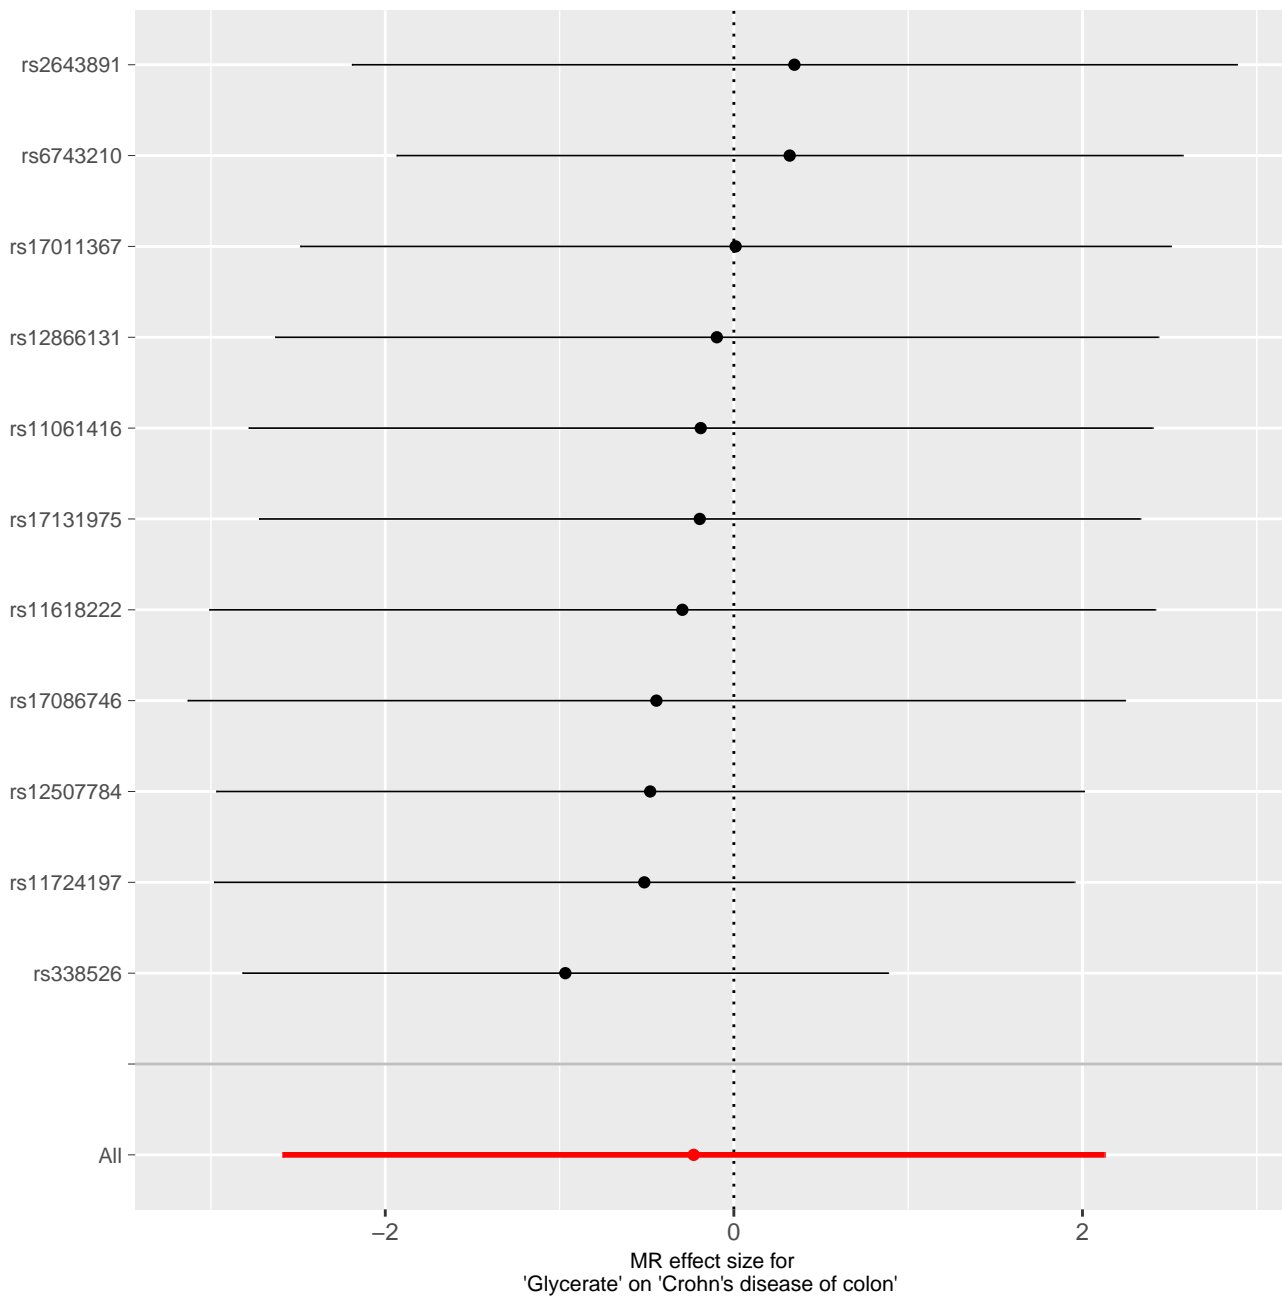

Batch 41 : Guanosine on Crohn's disease of colon

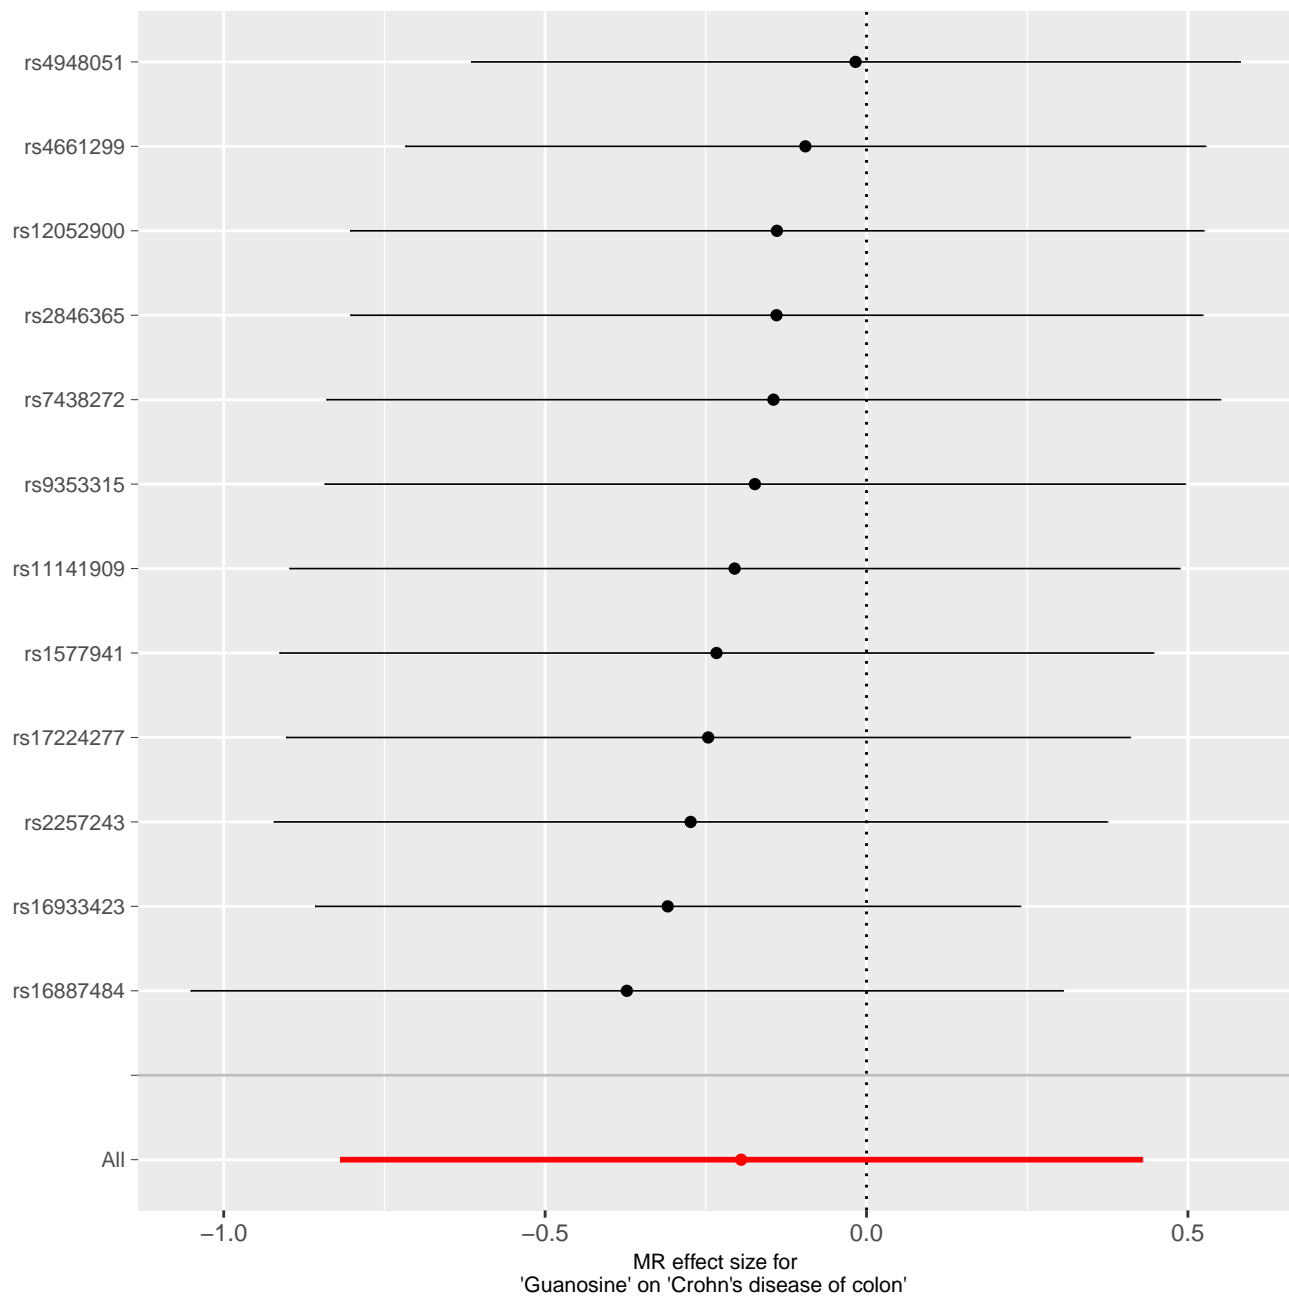

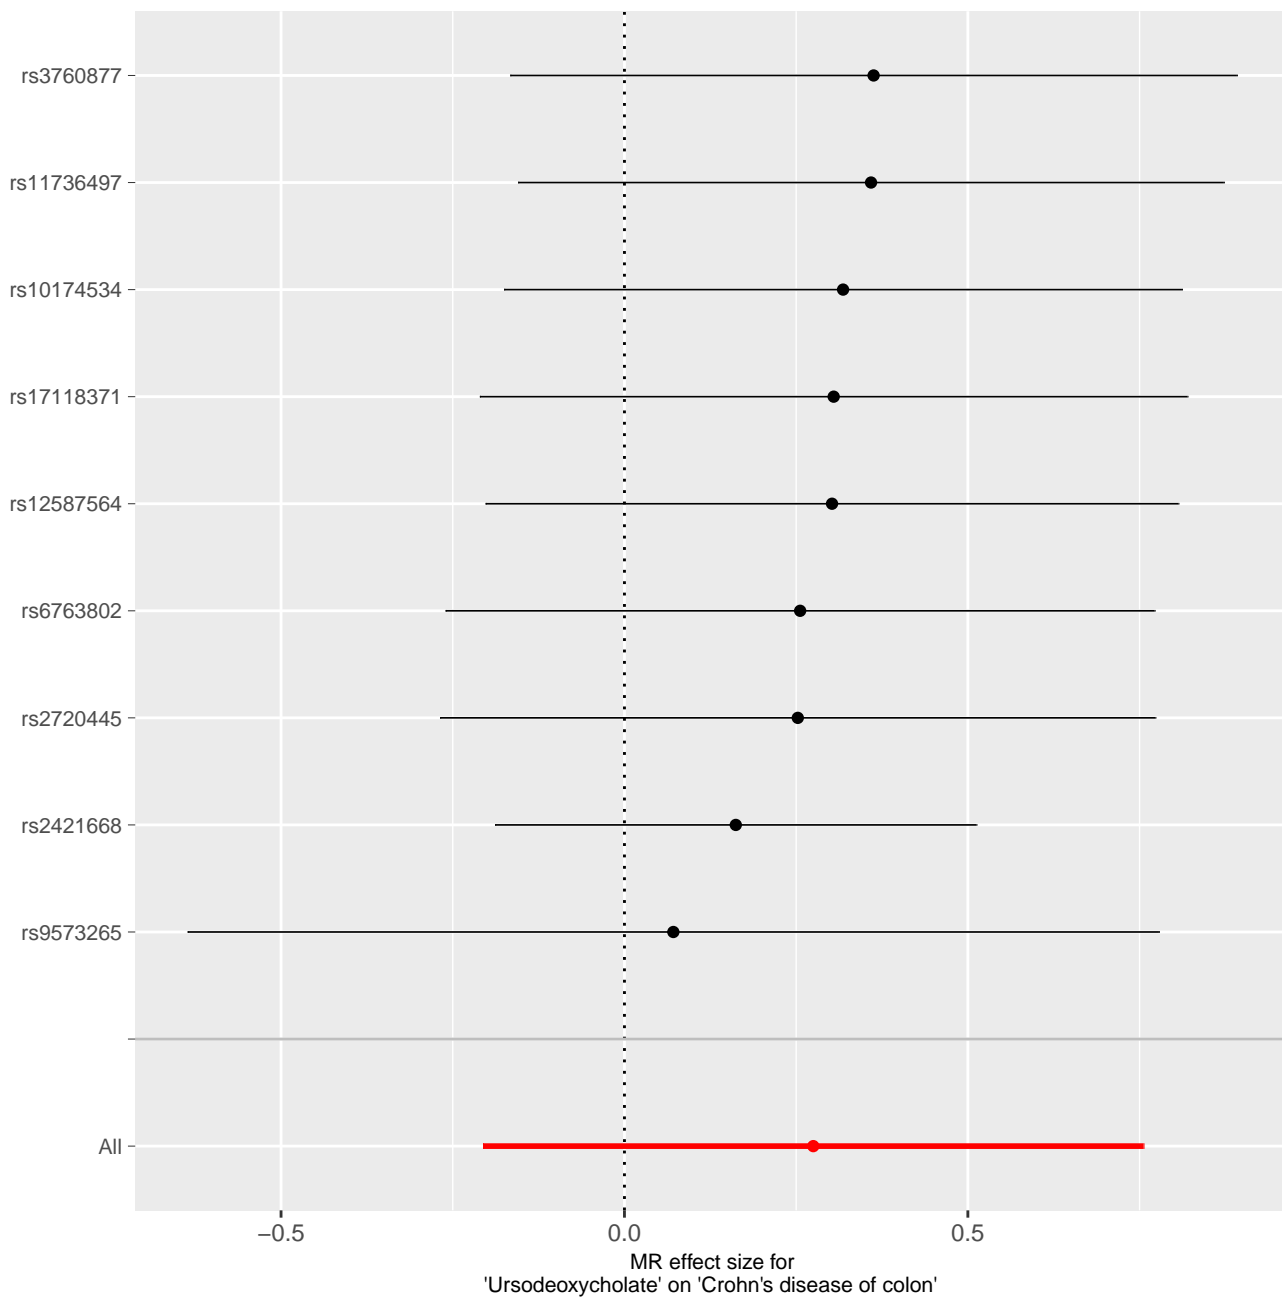

Batch 45 : Arginine on Crohn's disease of colon

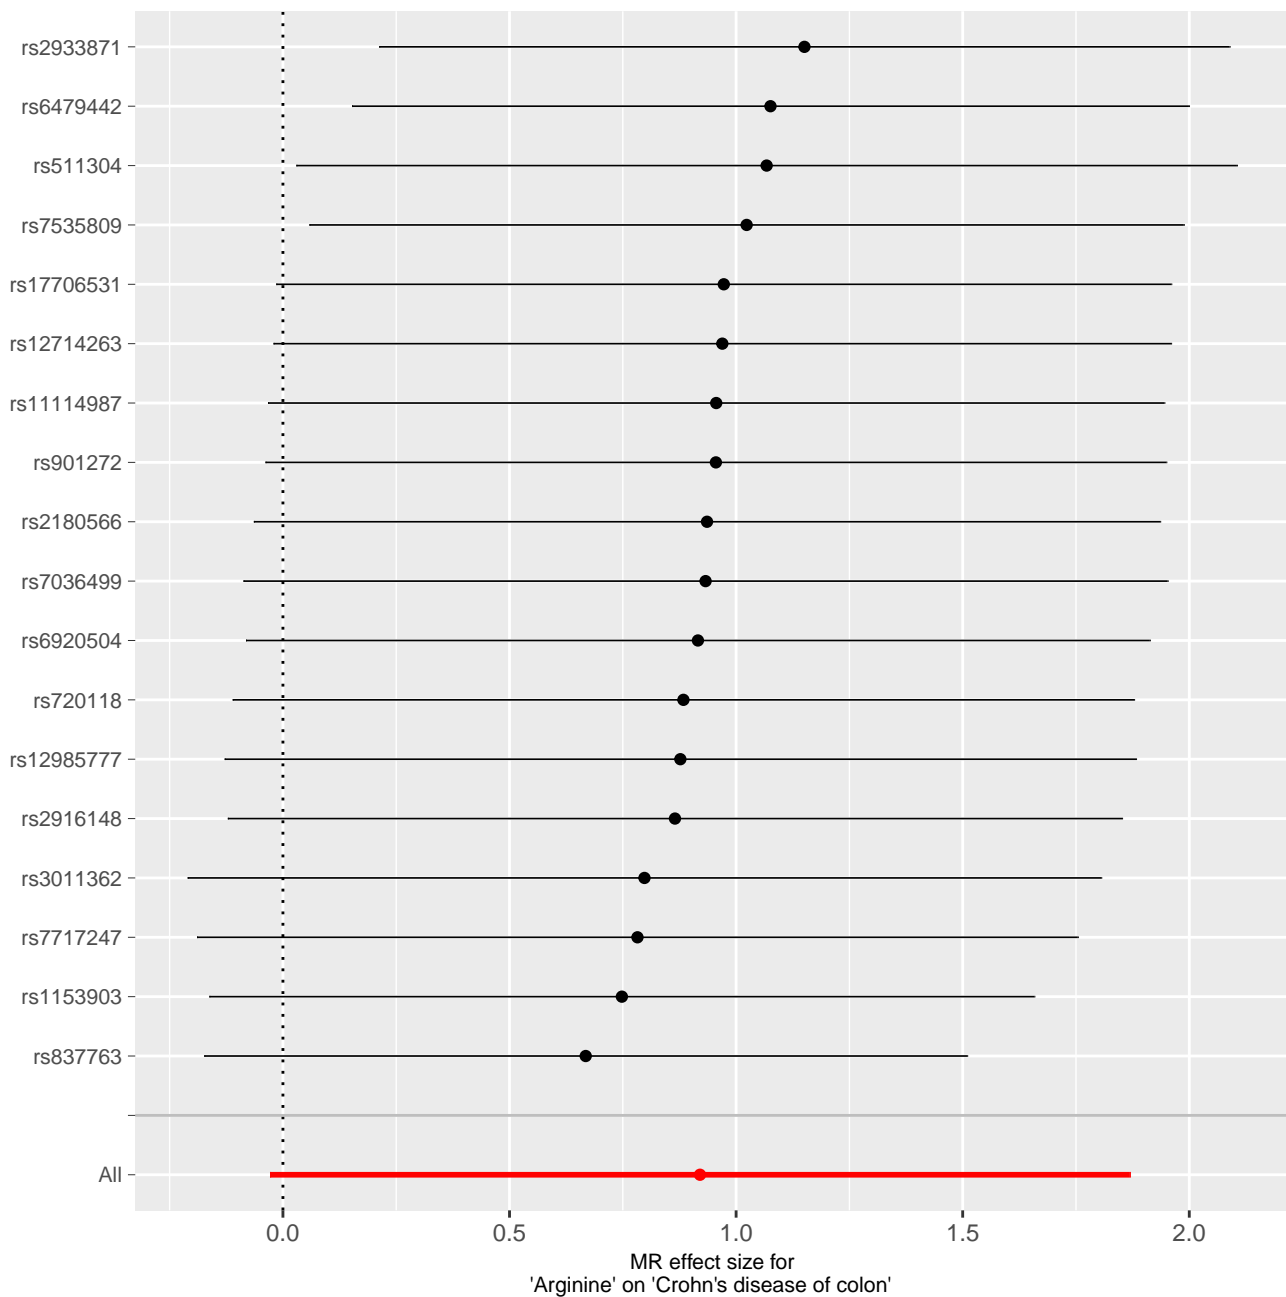

Batch 46 : Ascorbate (Vitamin C) on Crohn's disease of colon

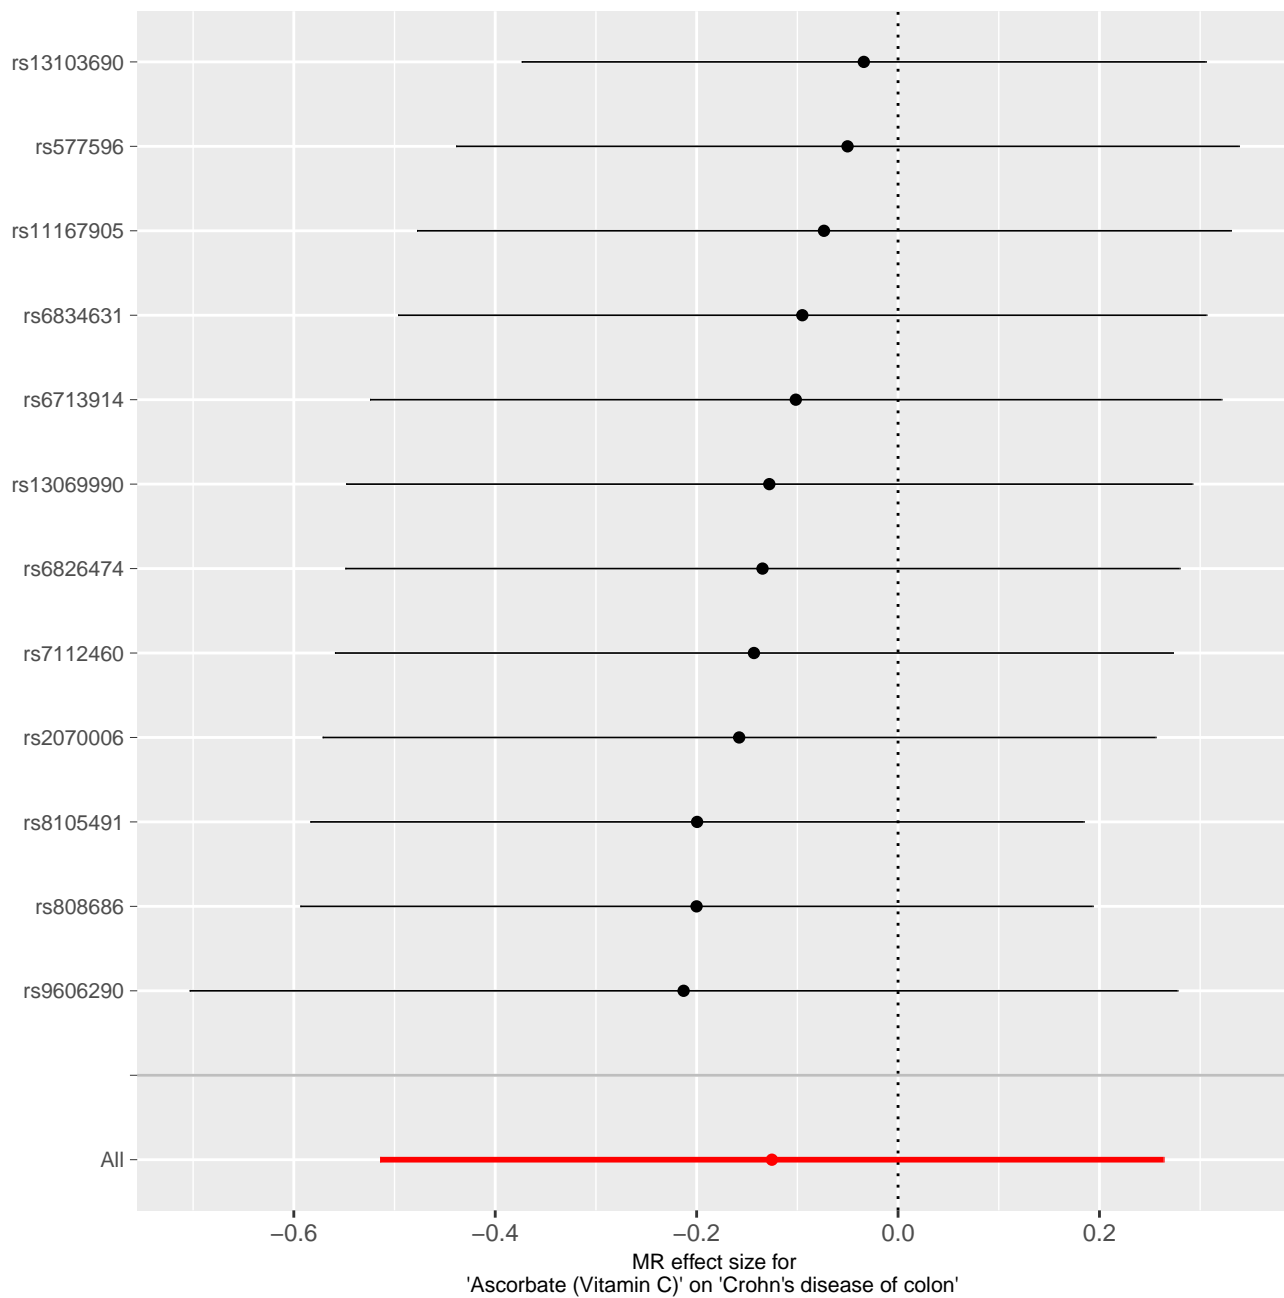

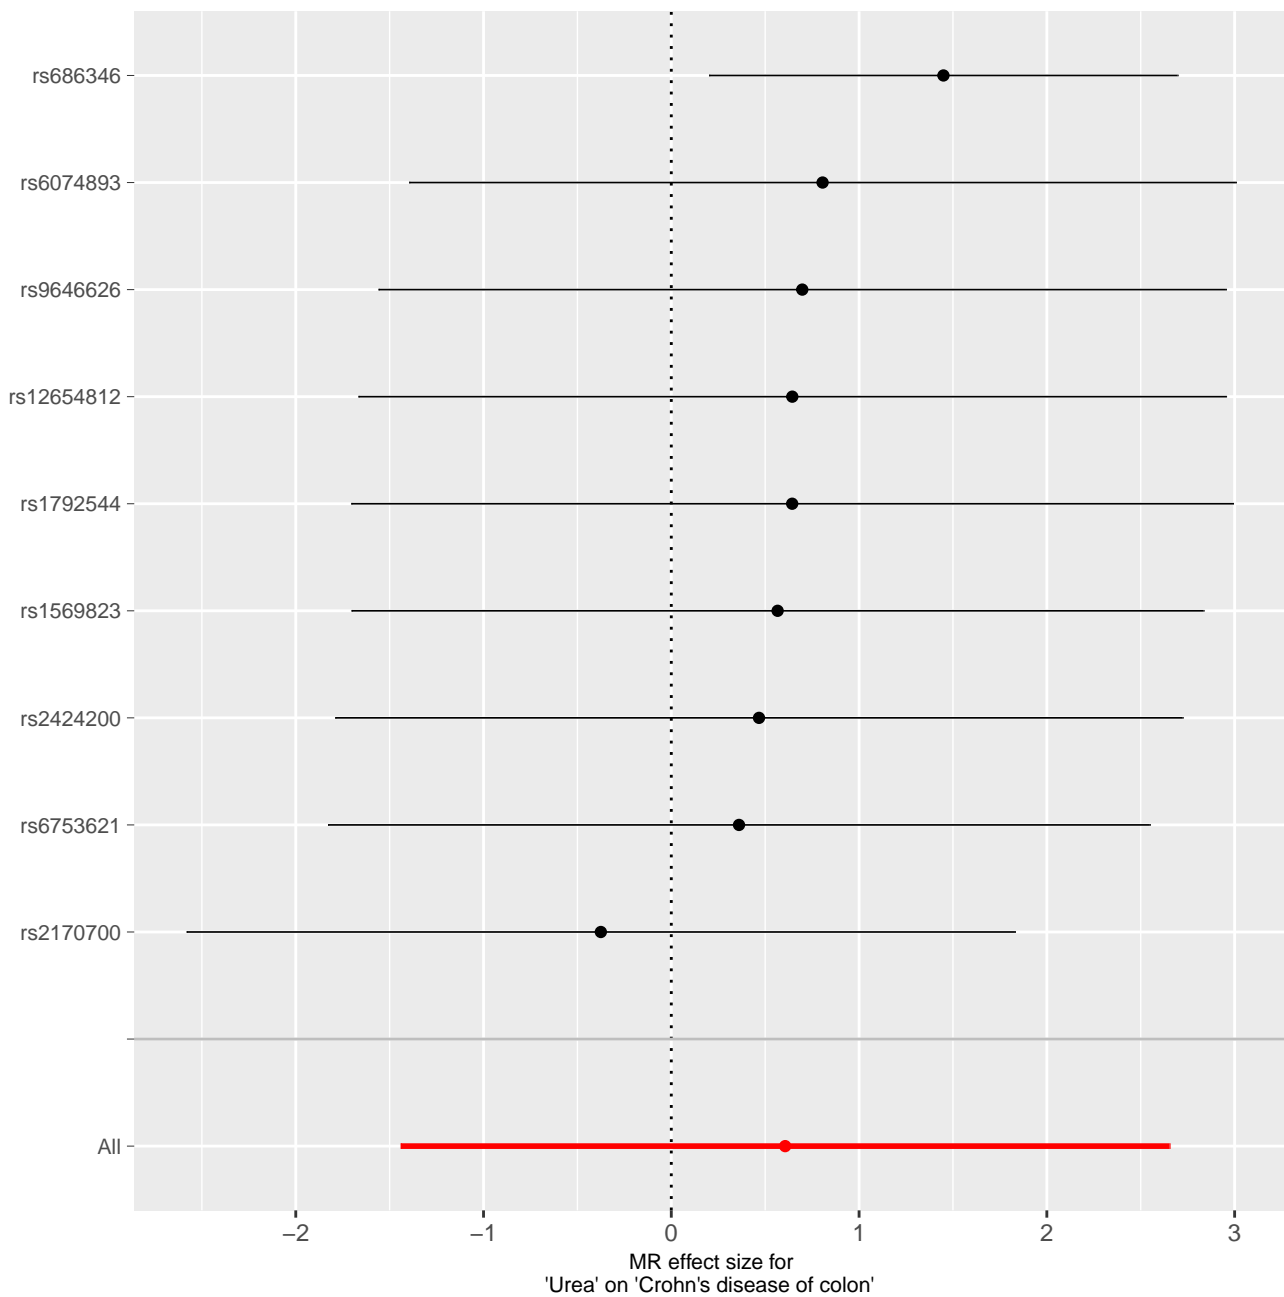

Batch 51 : Cortisol on Crohn's disease of colon

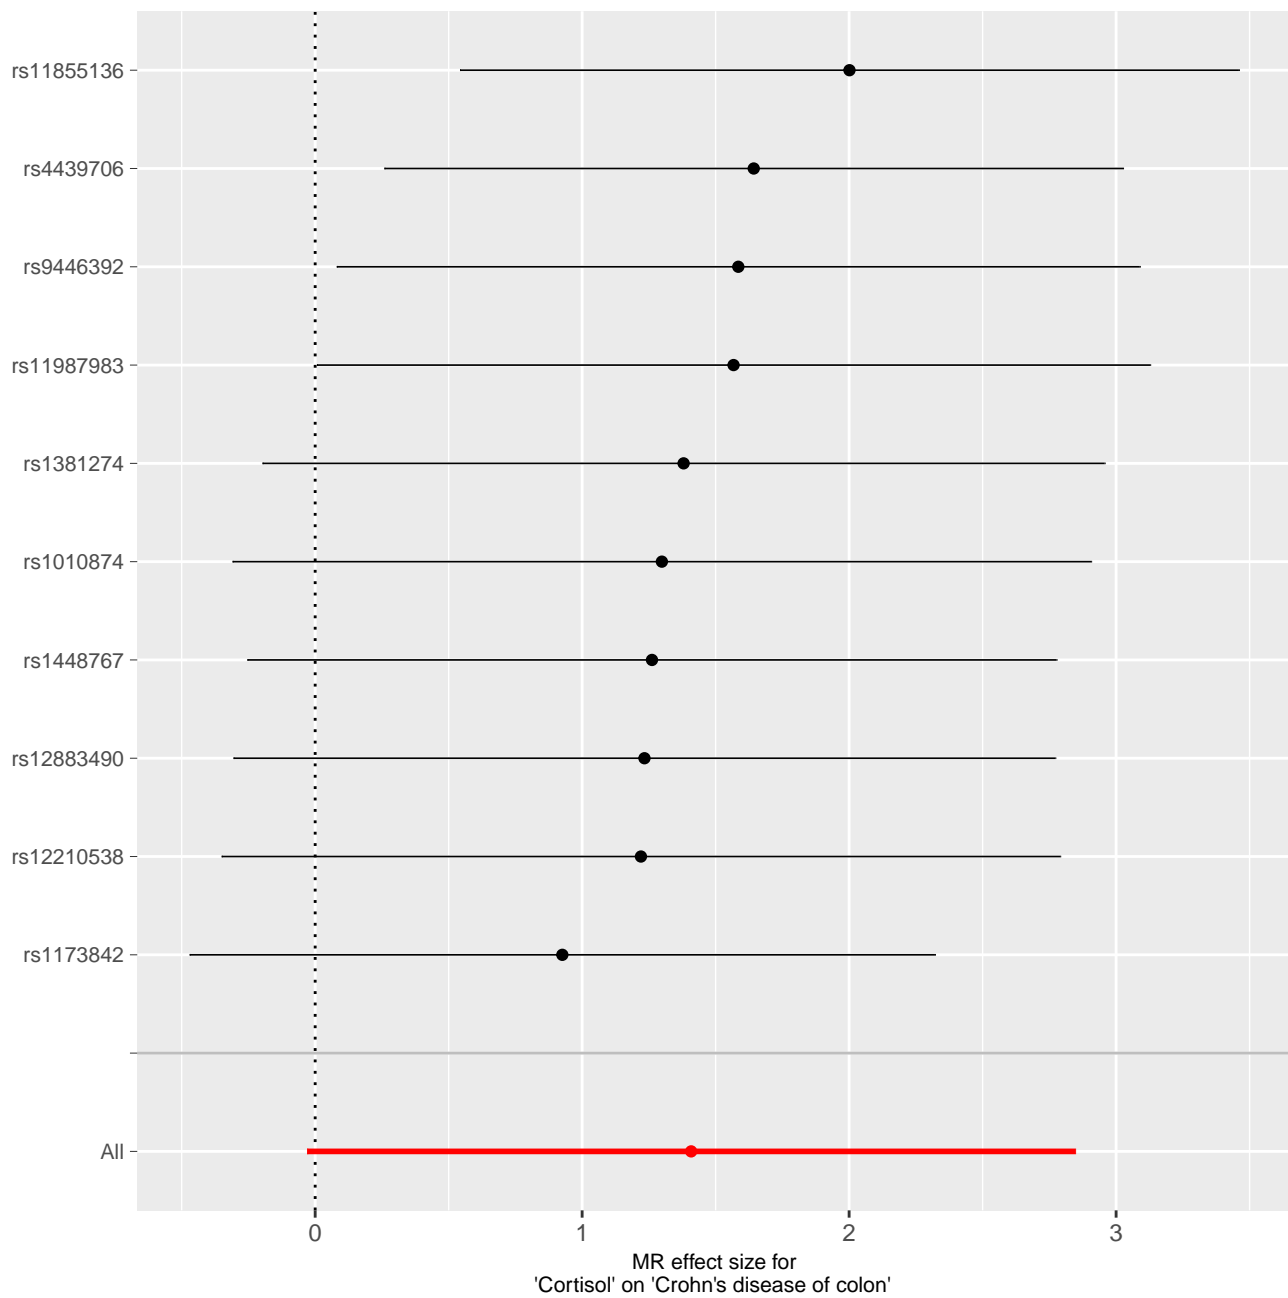



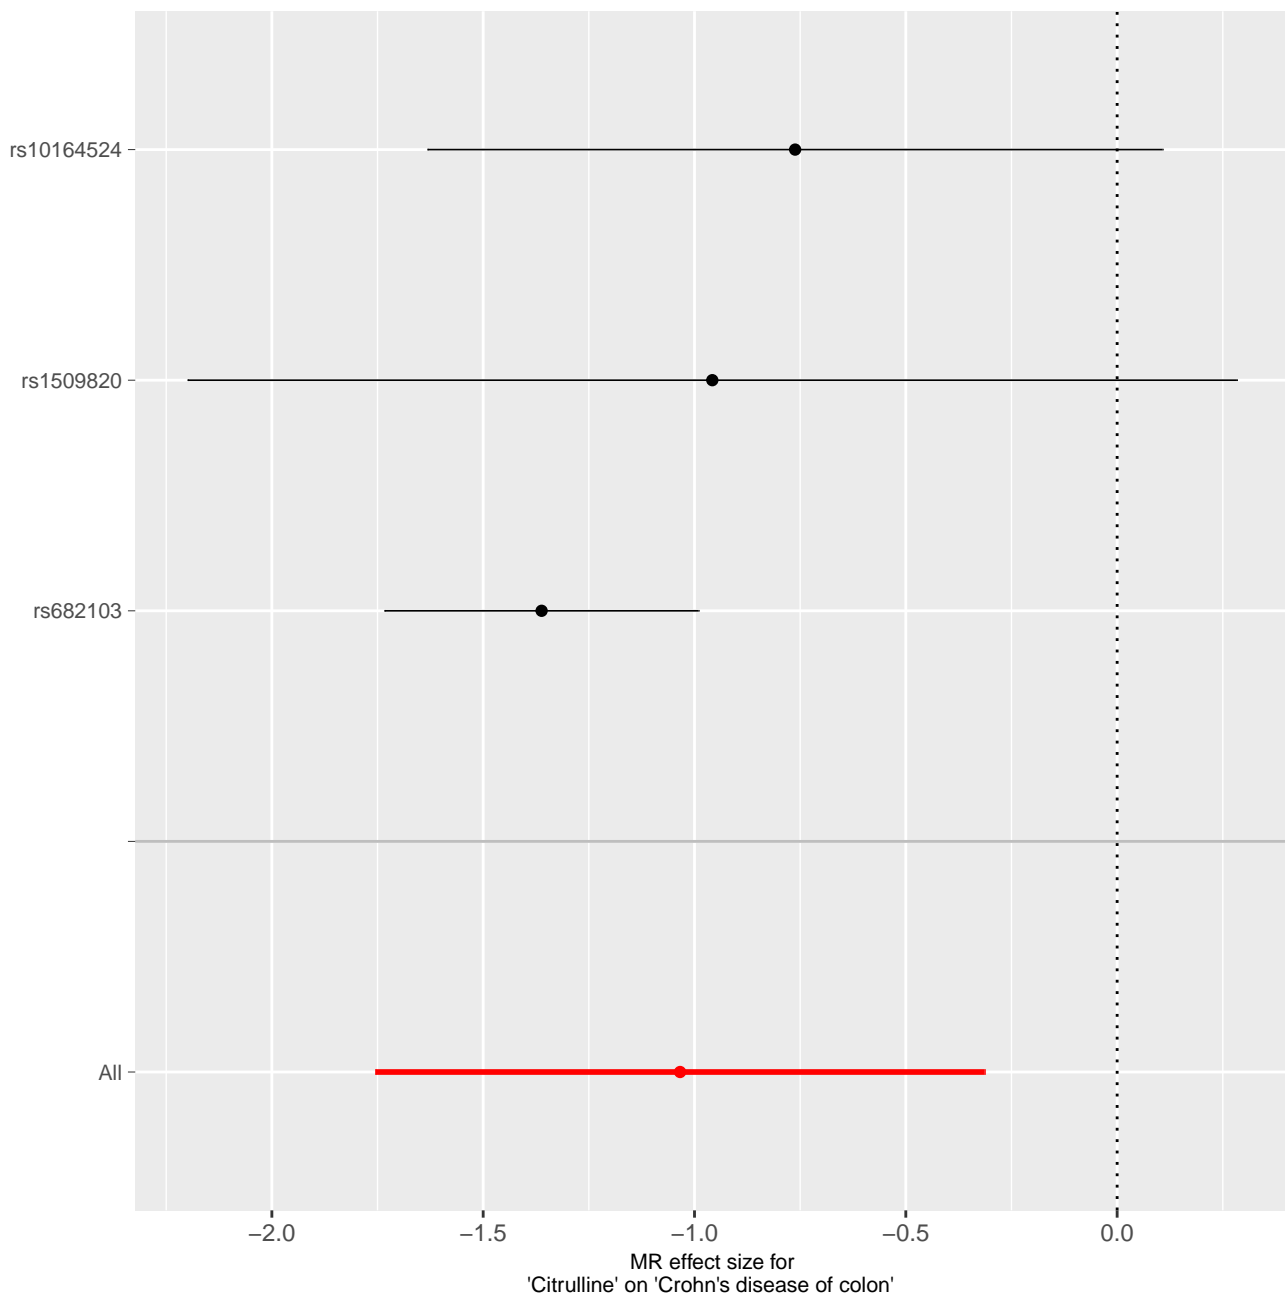

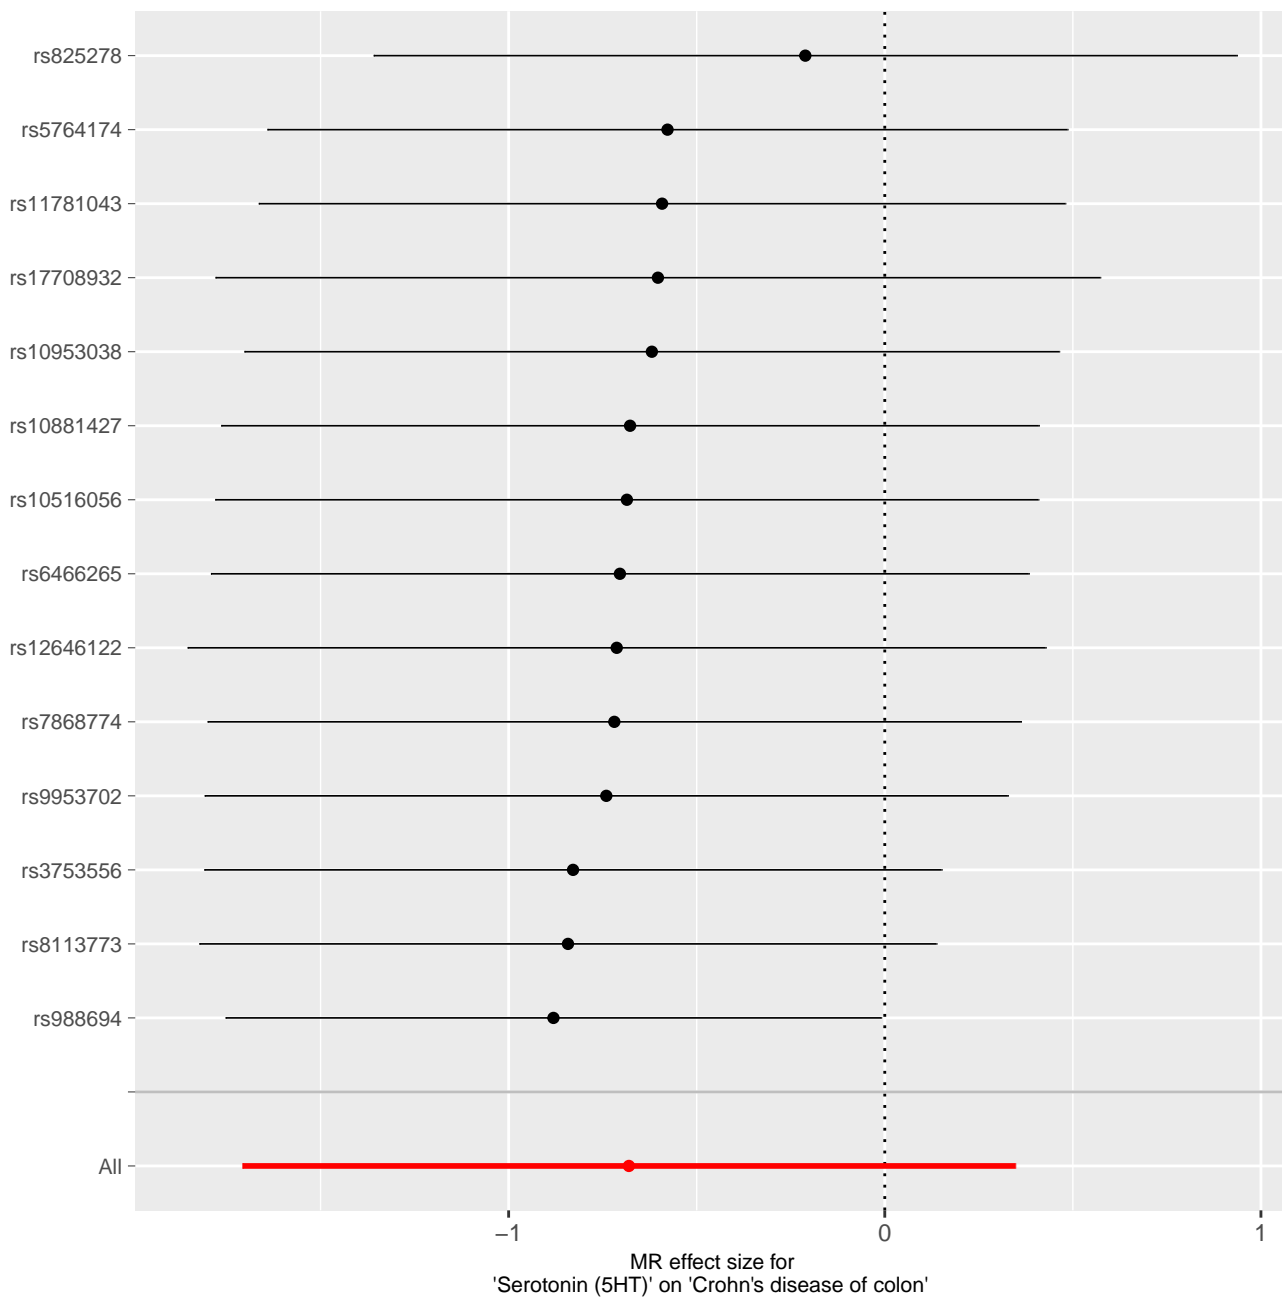

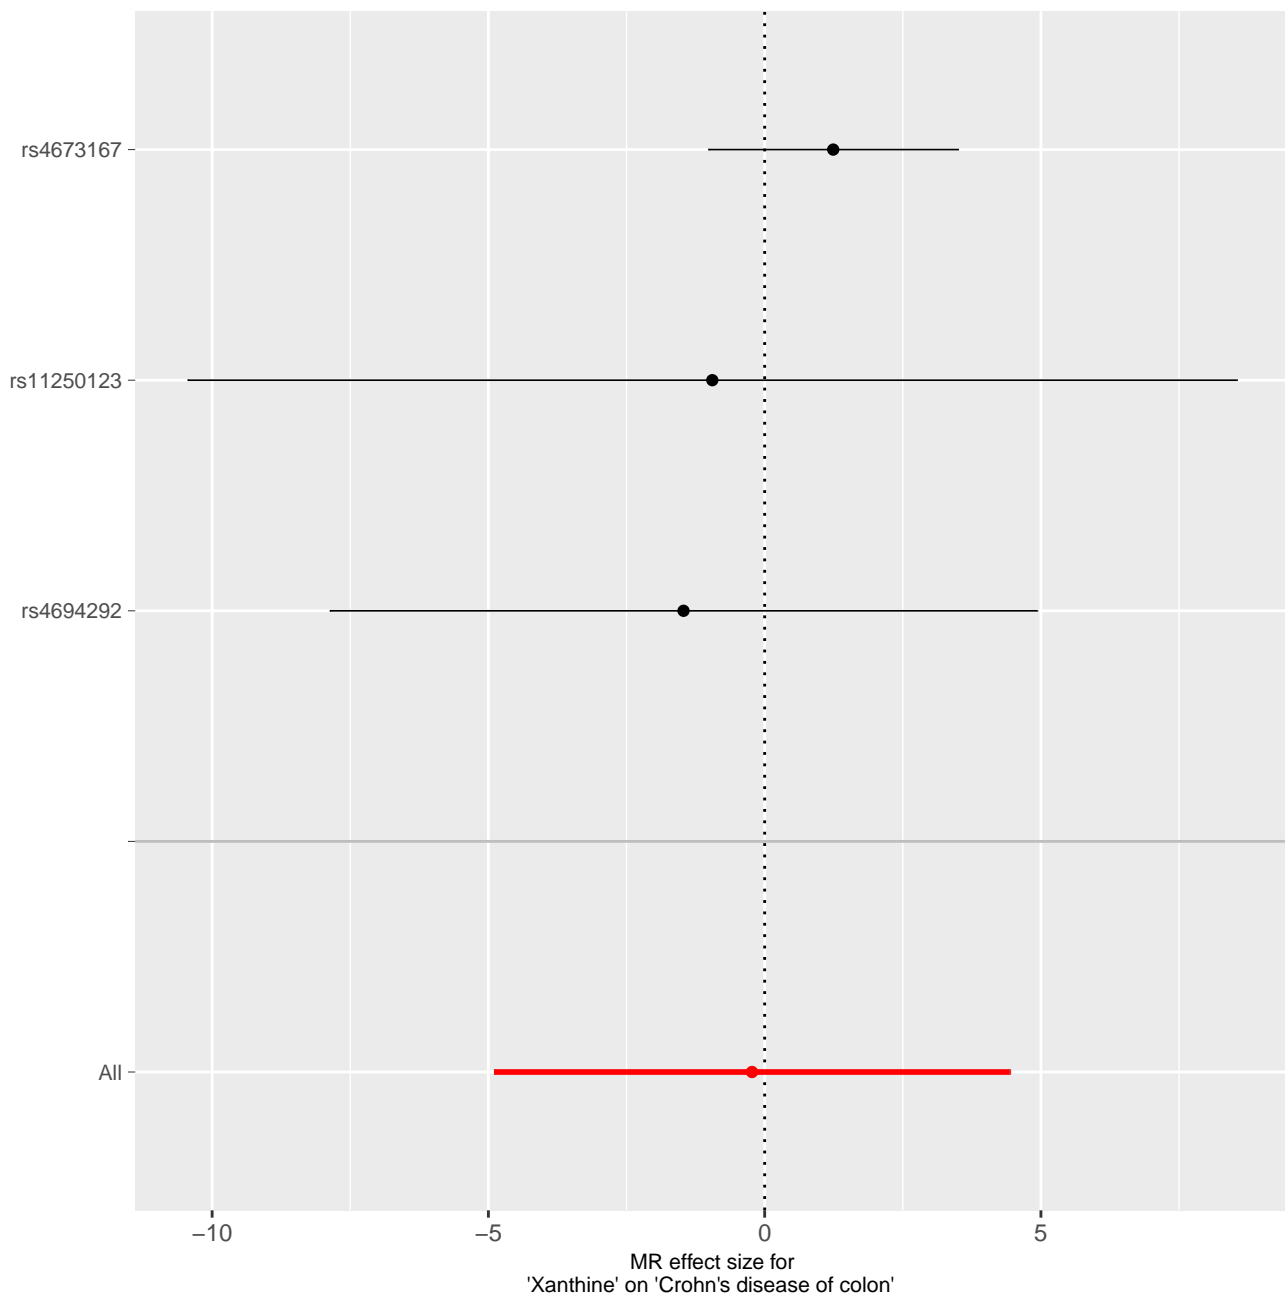

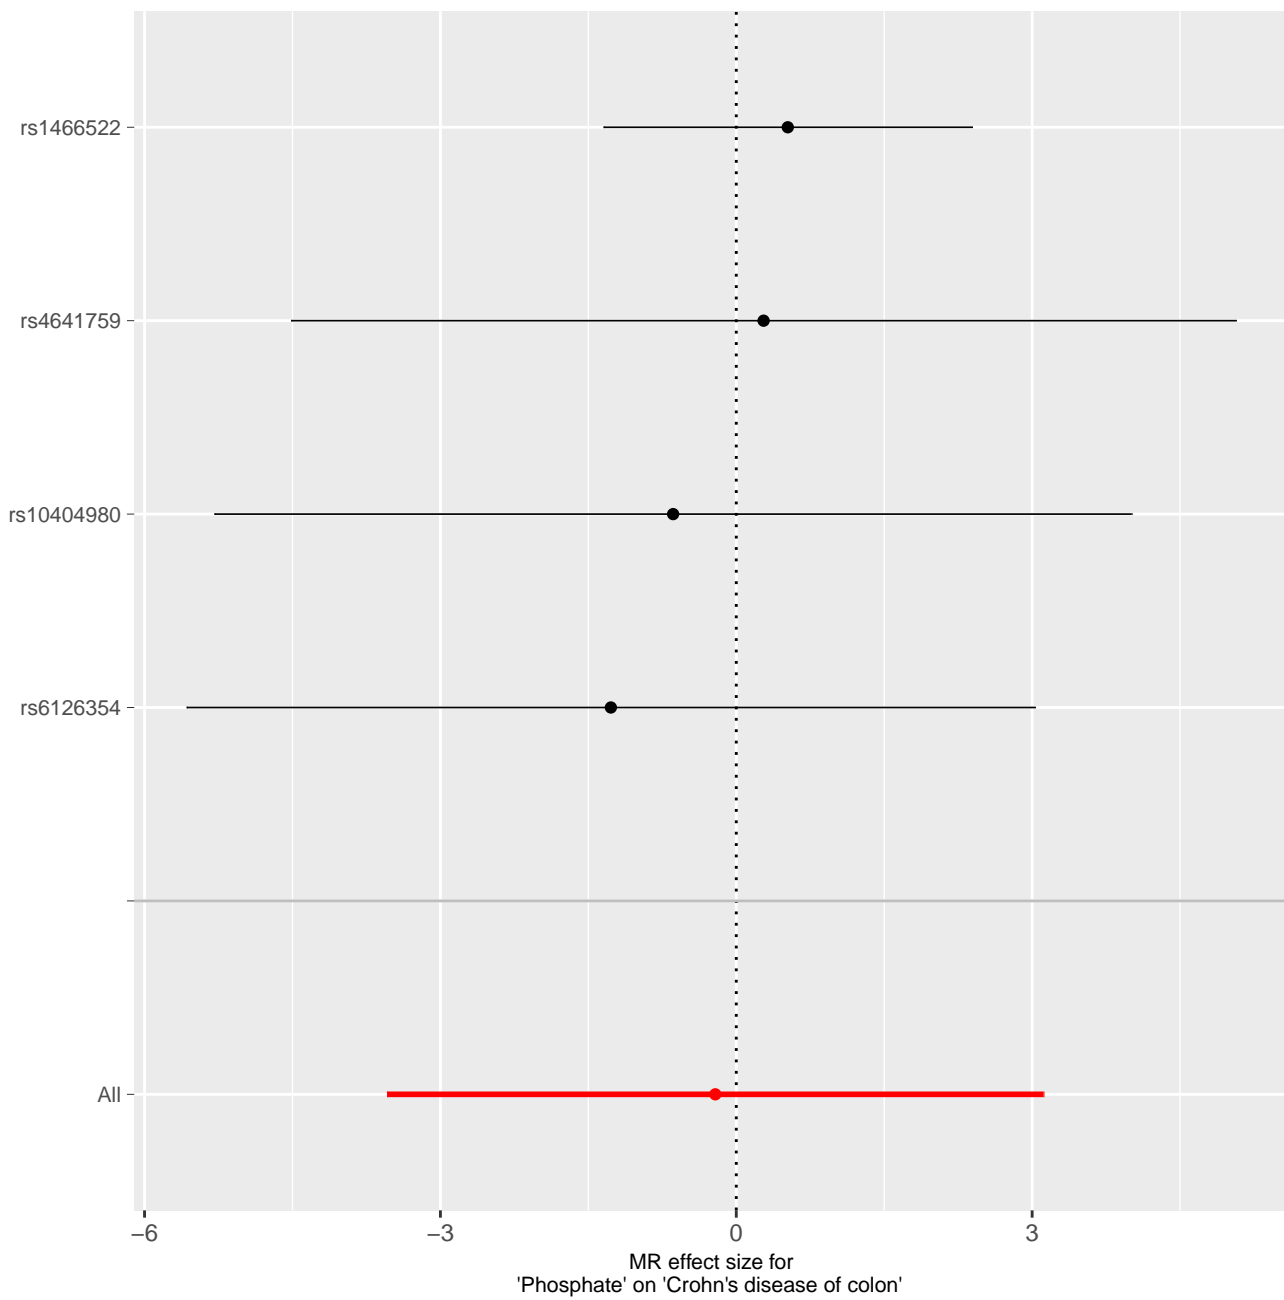

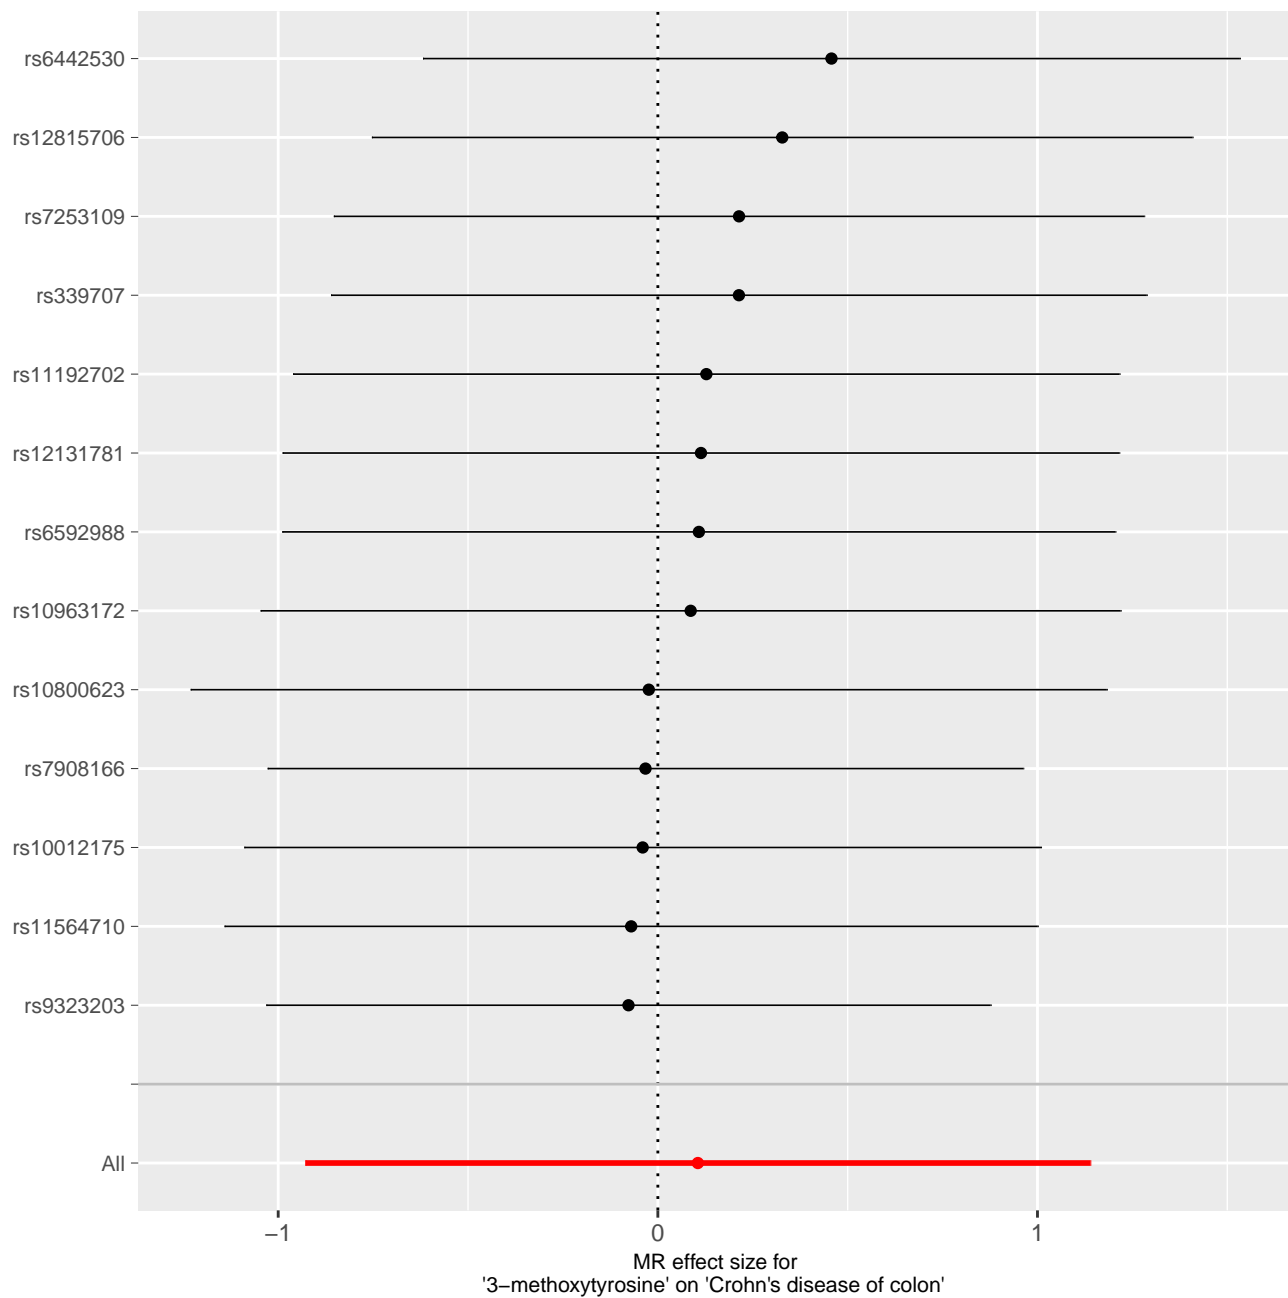

Batch 65 : Undecanoate (11:0) on Crohn's disease of colon

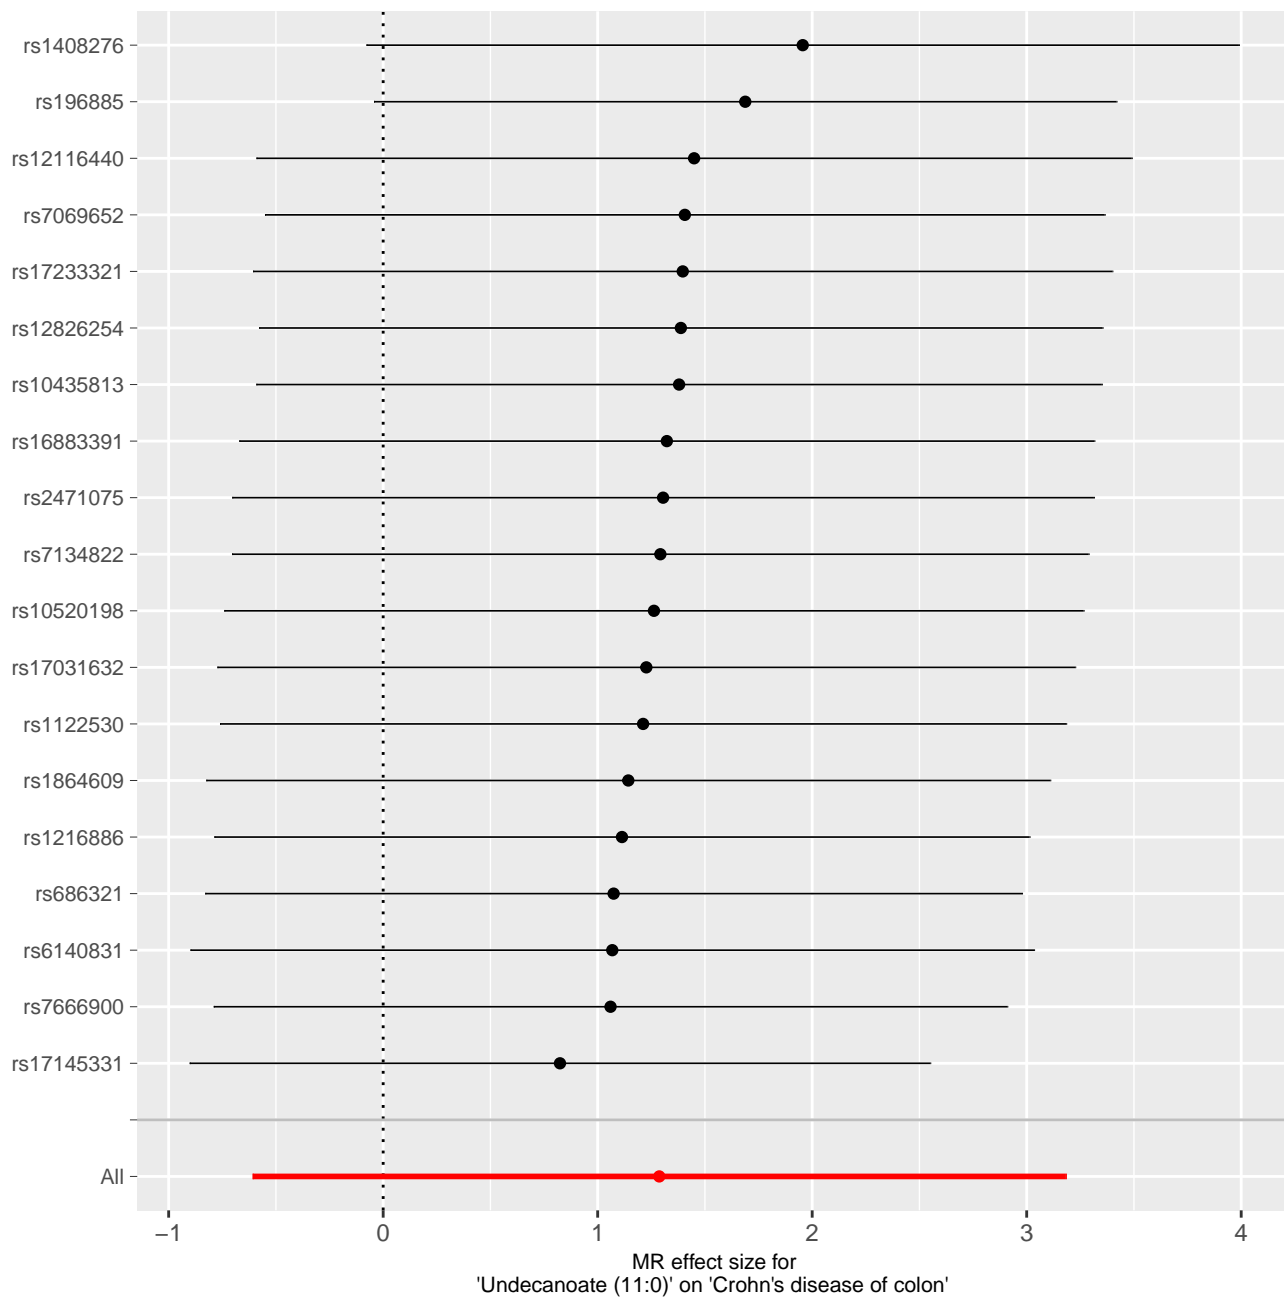

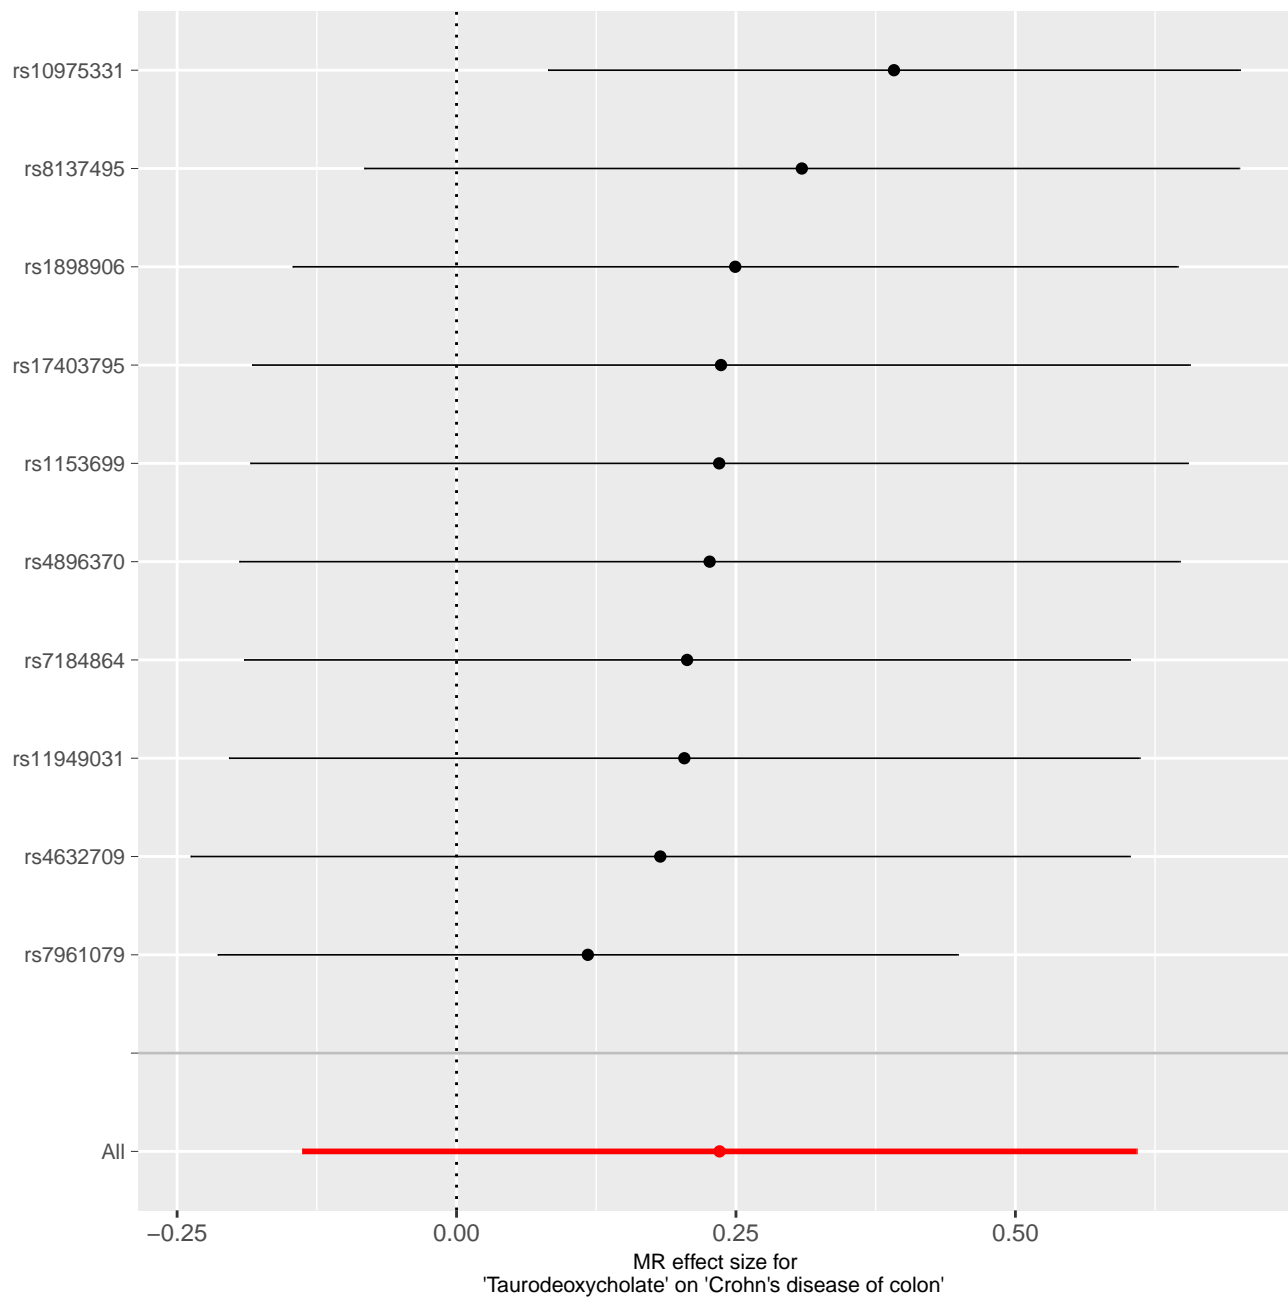

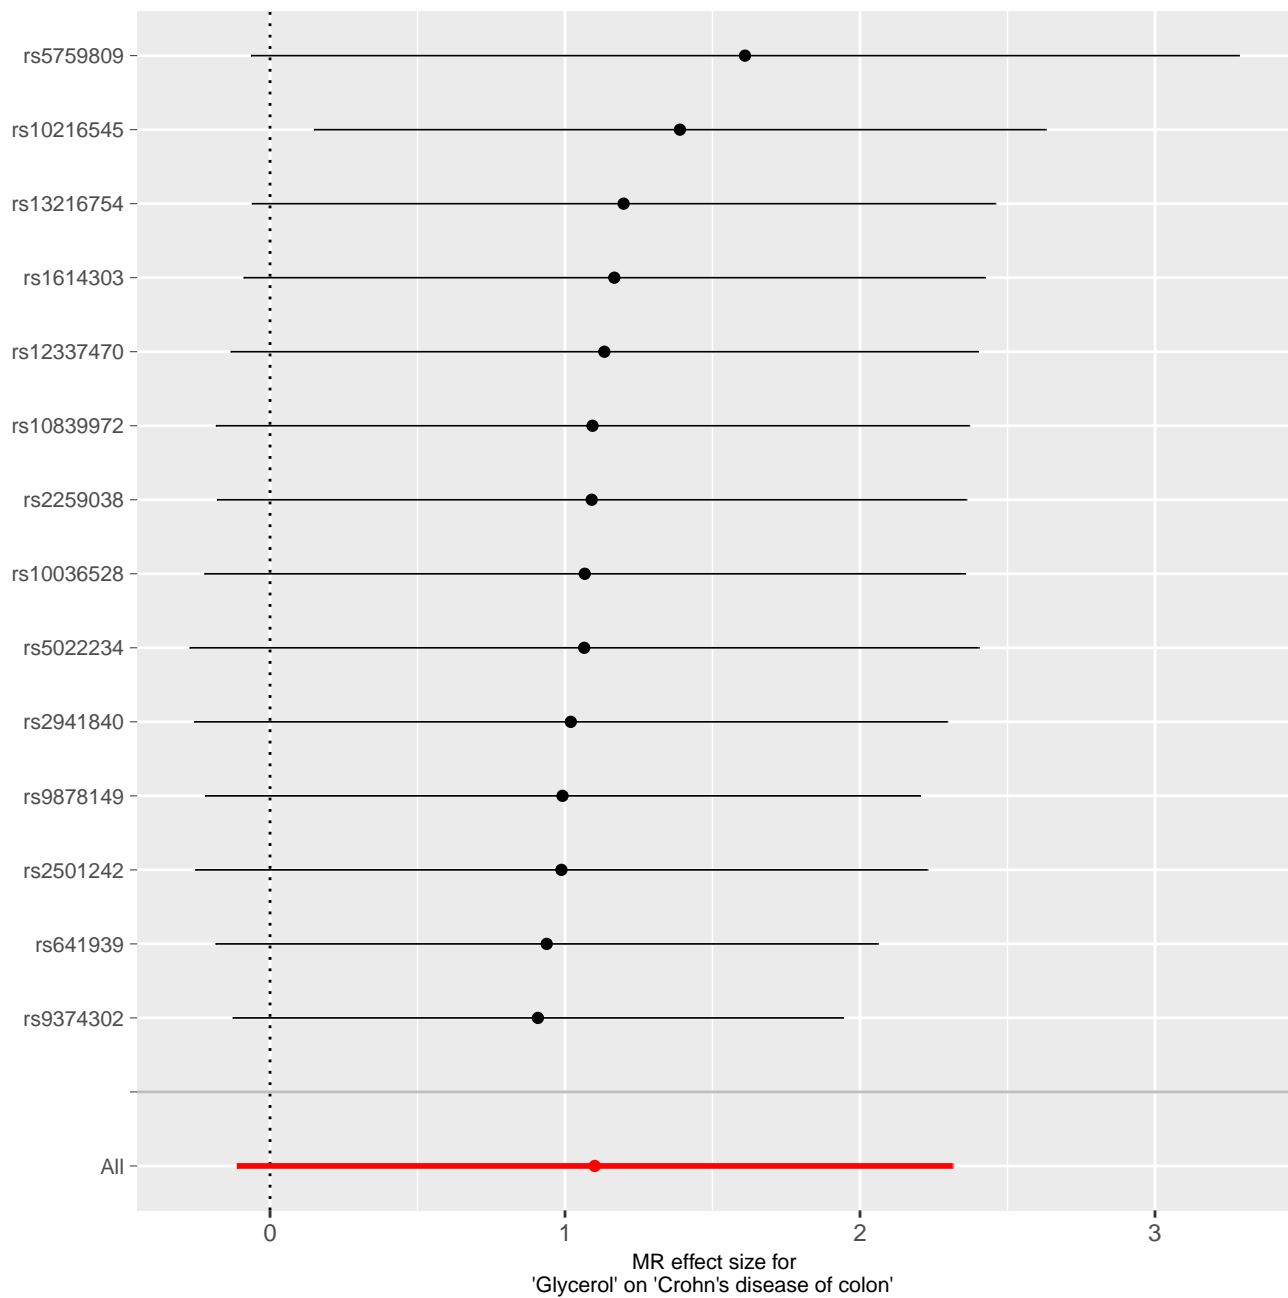



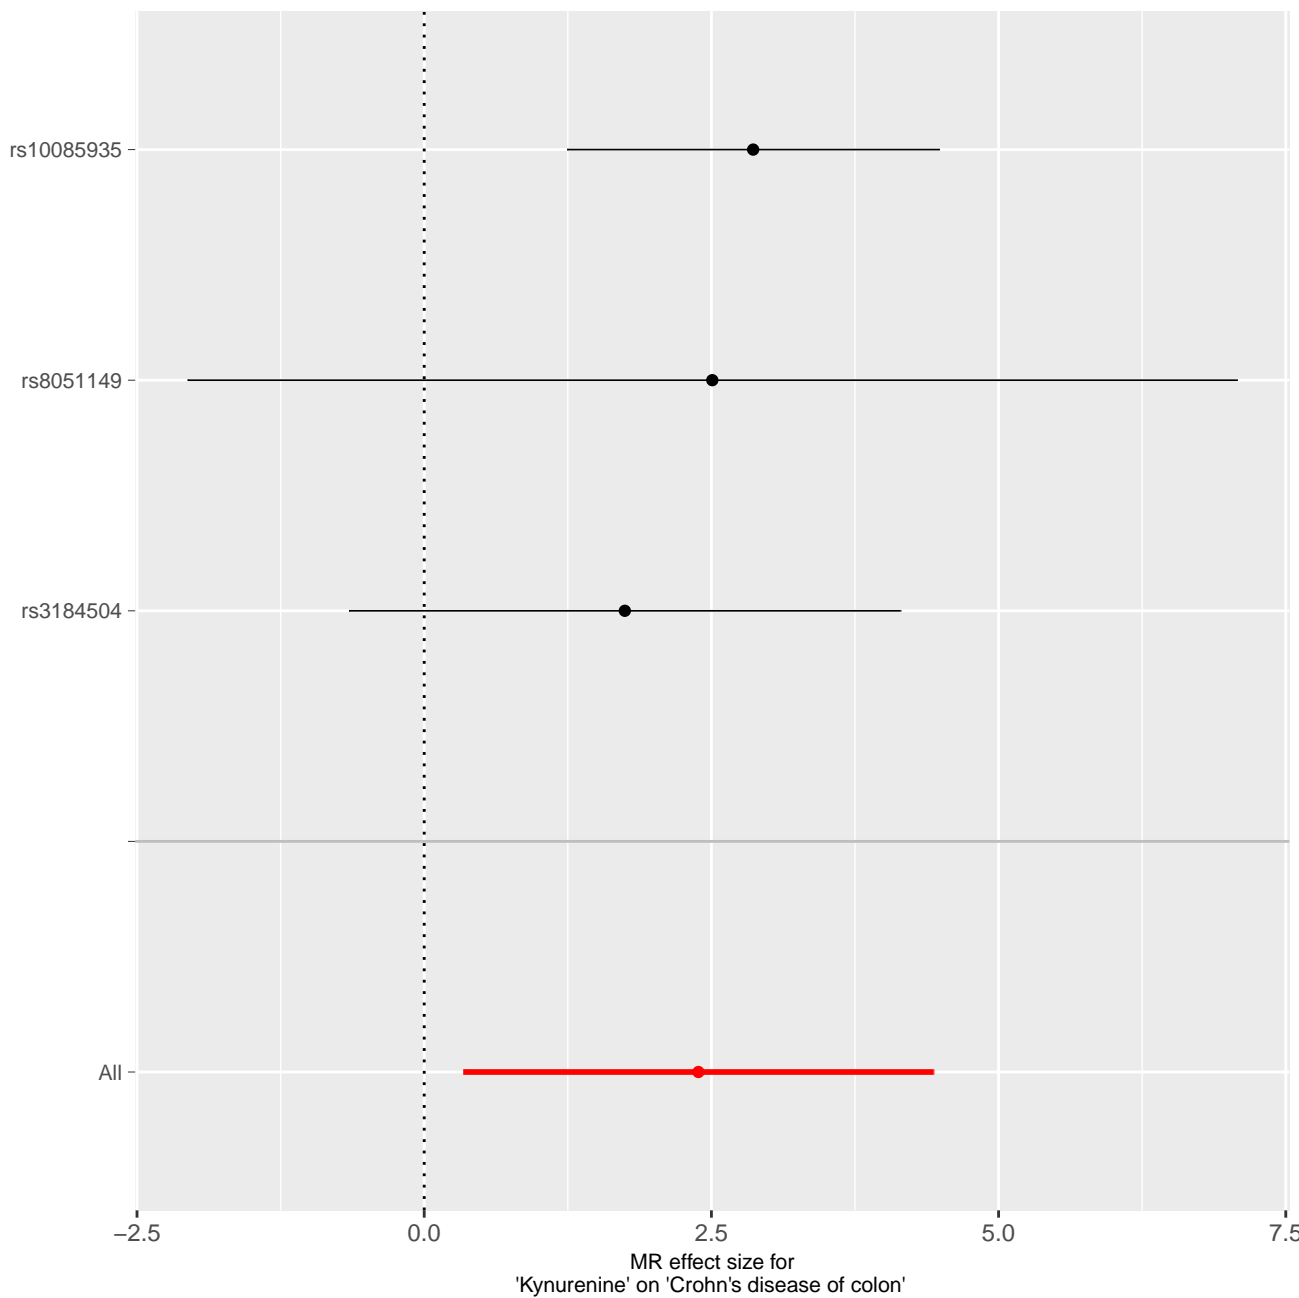

Batch 70 : Mannitol on Crohn's disease of colon

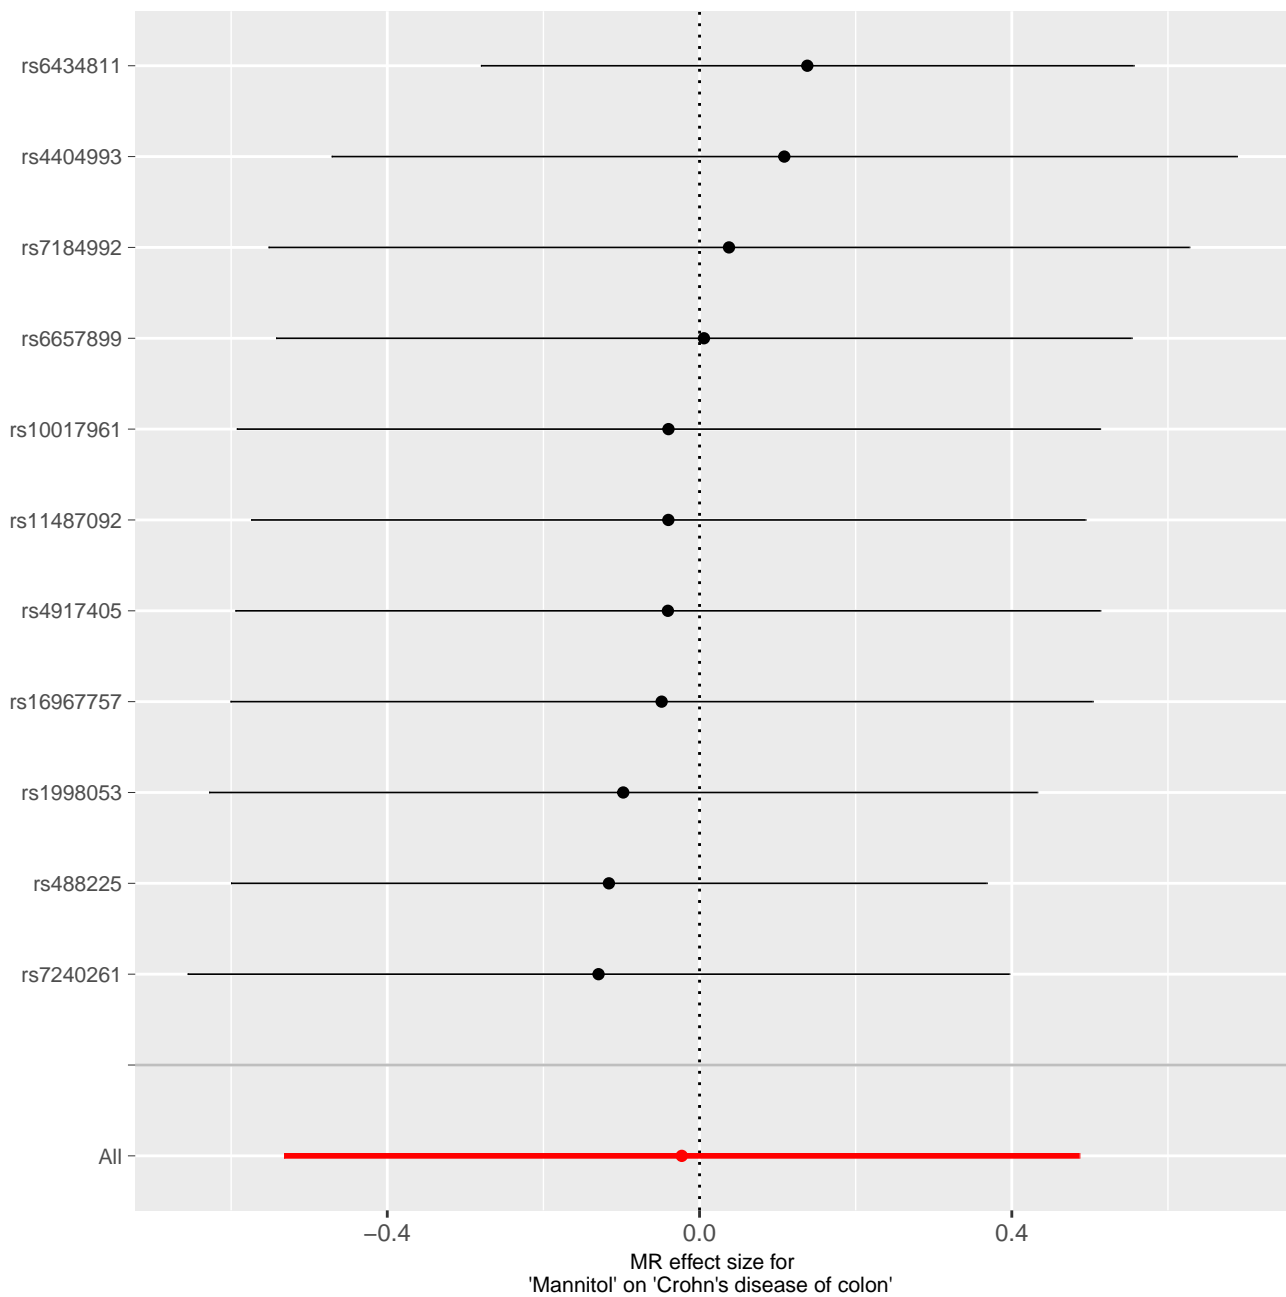

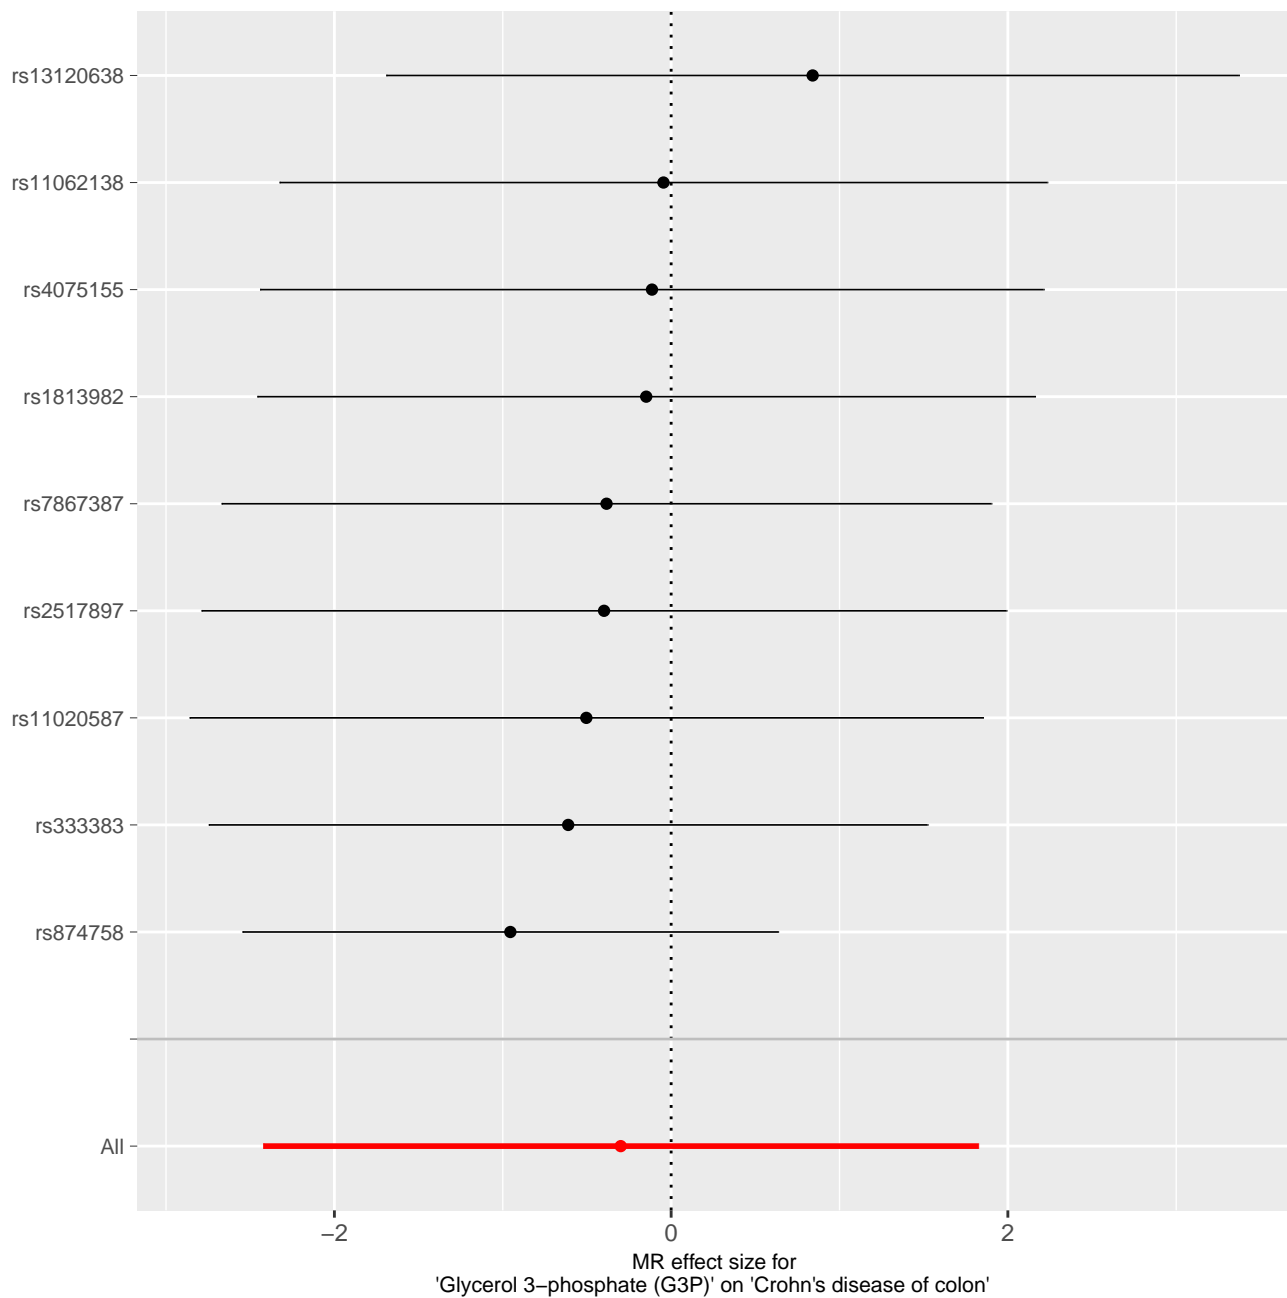

Batch 73 : Carnitine on Crohn's disease of colon

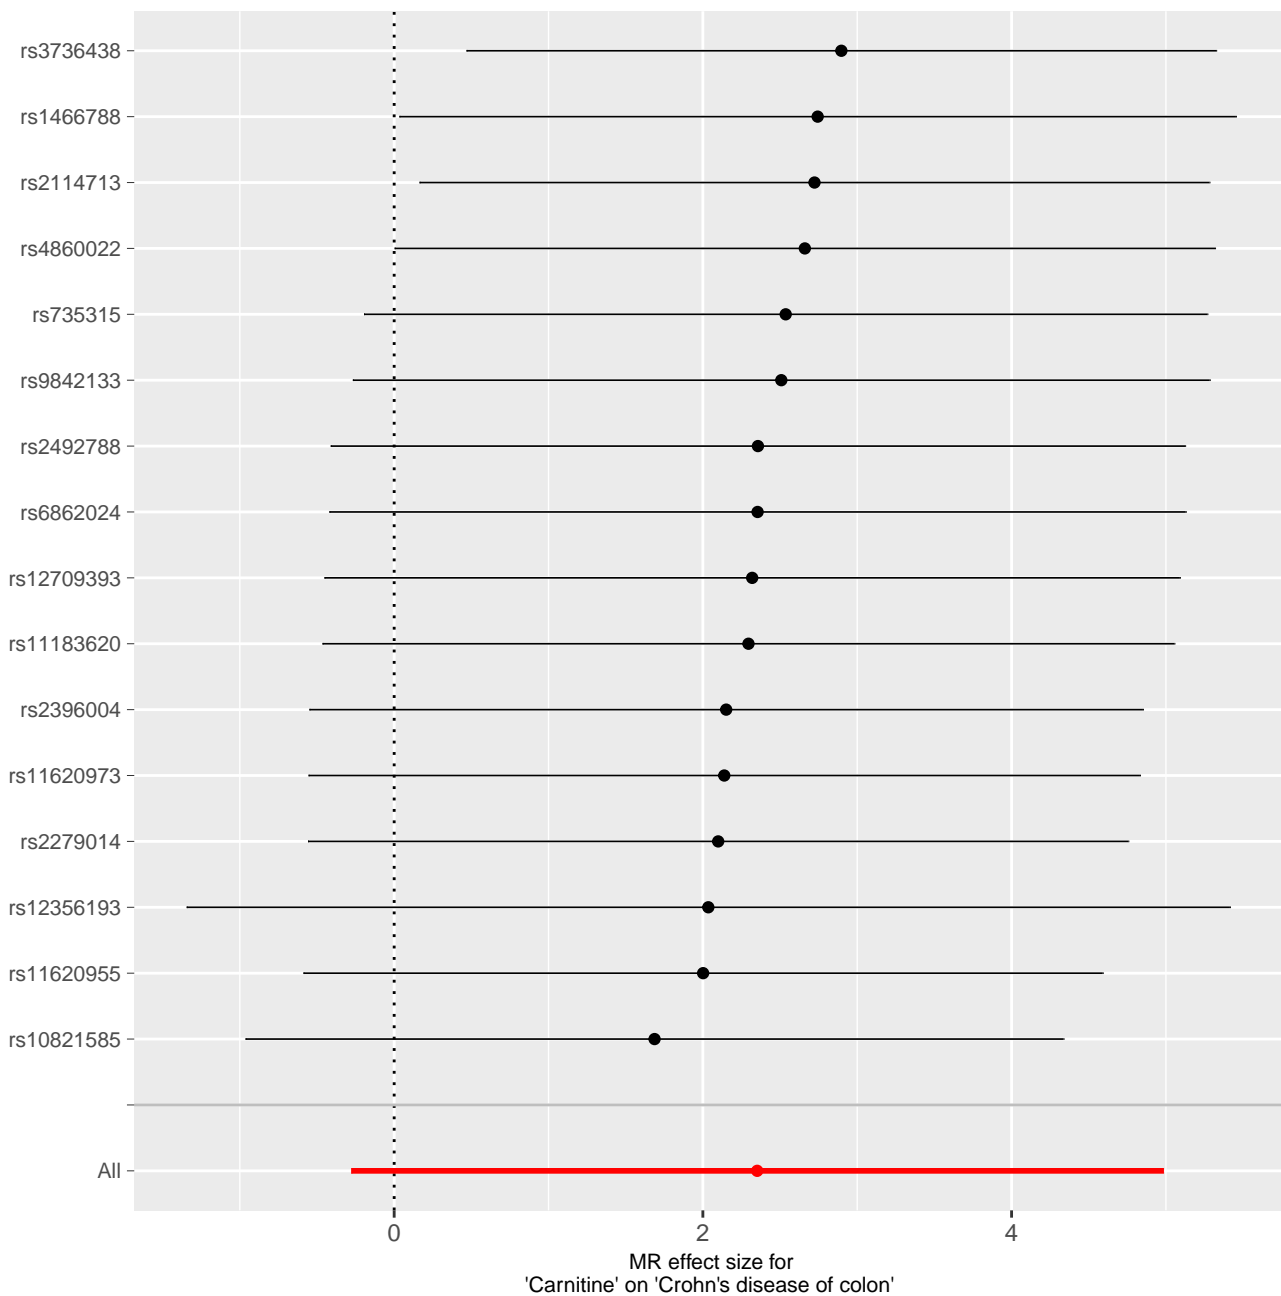

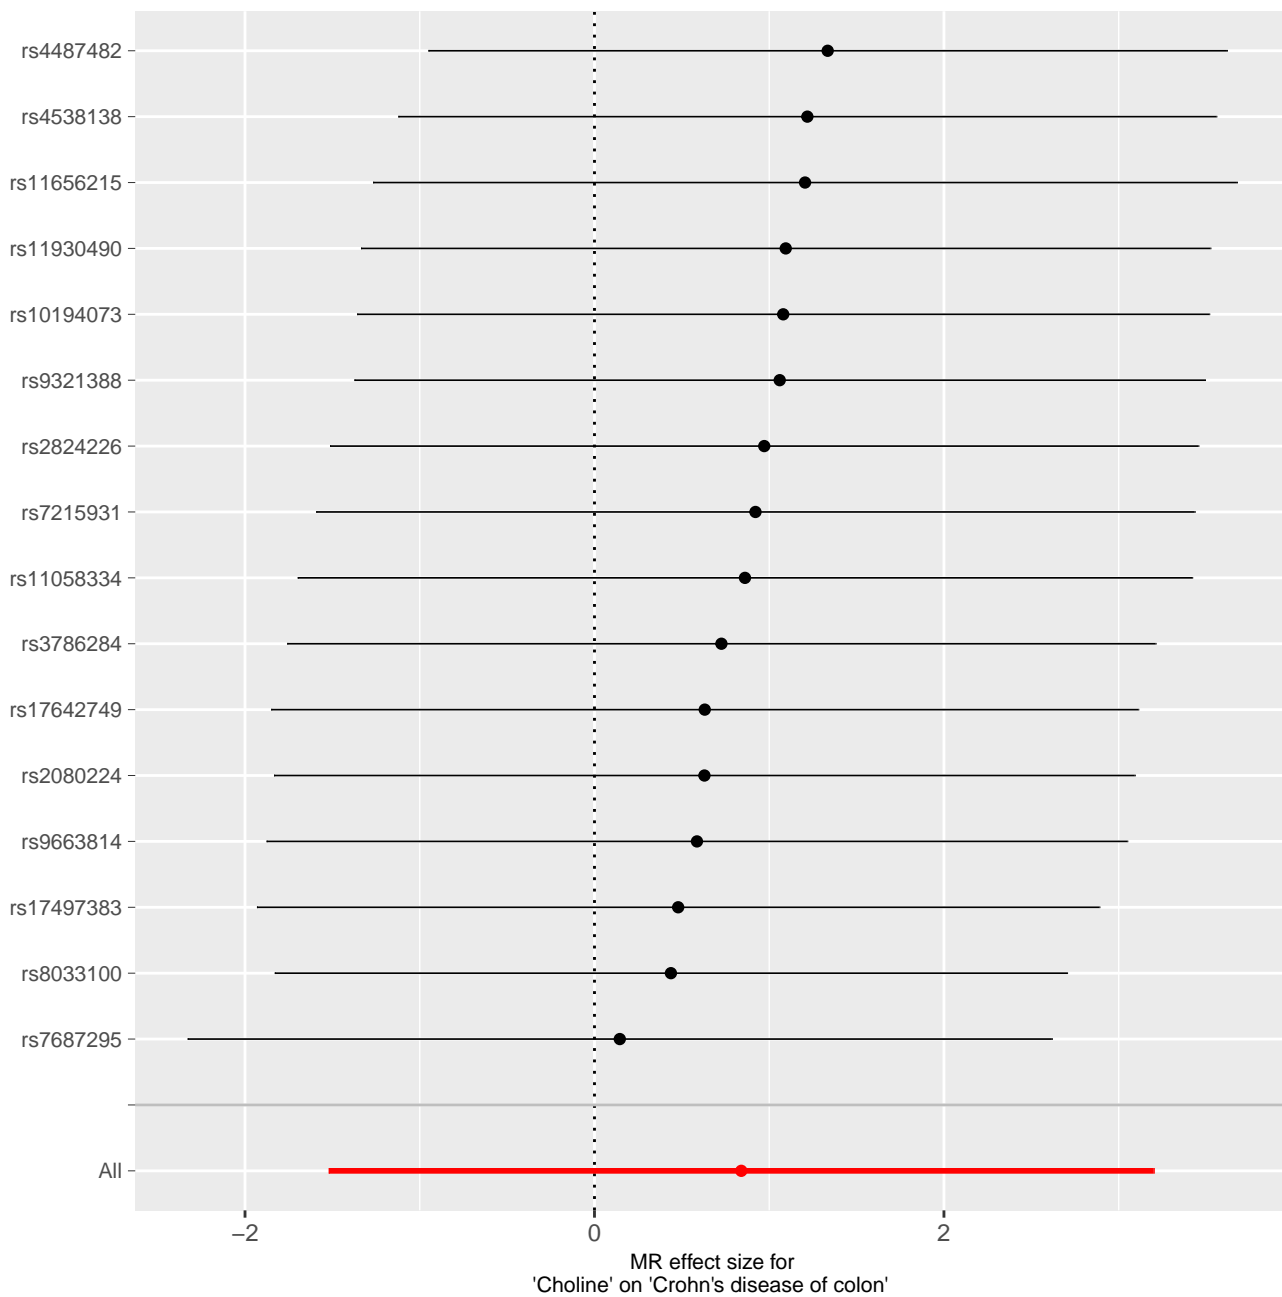

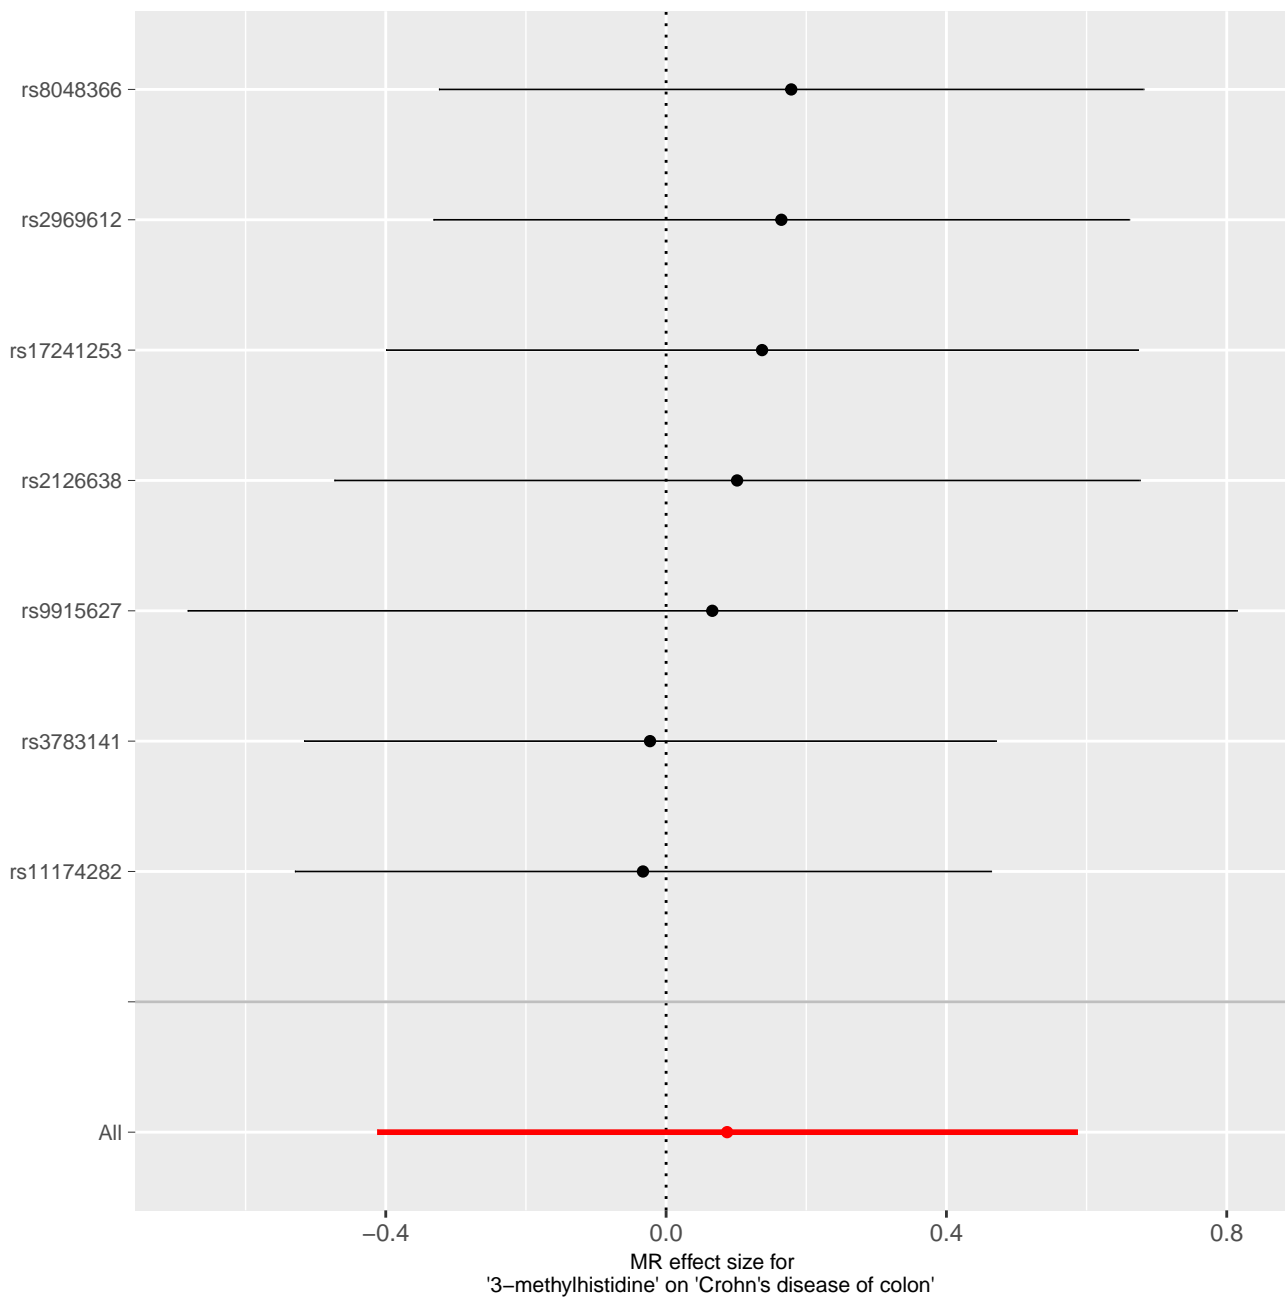

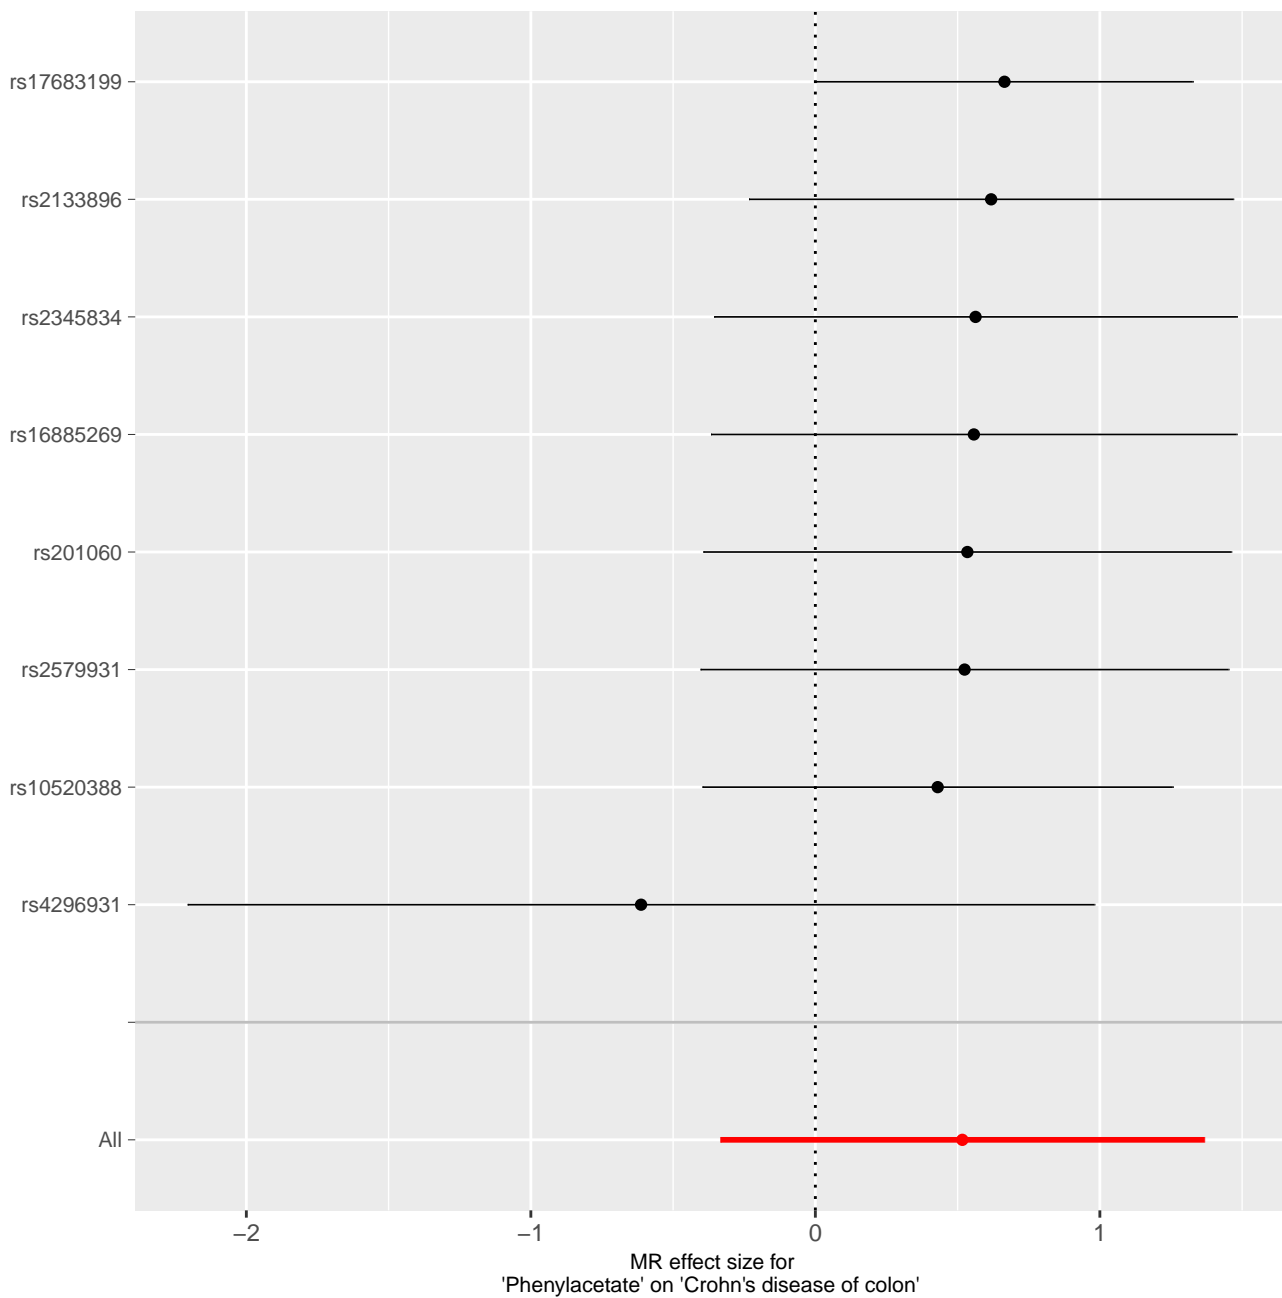

Batch 81 : Glycerophosphorylcholine (GPC) on Crohn's disease of colon

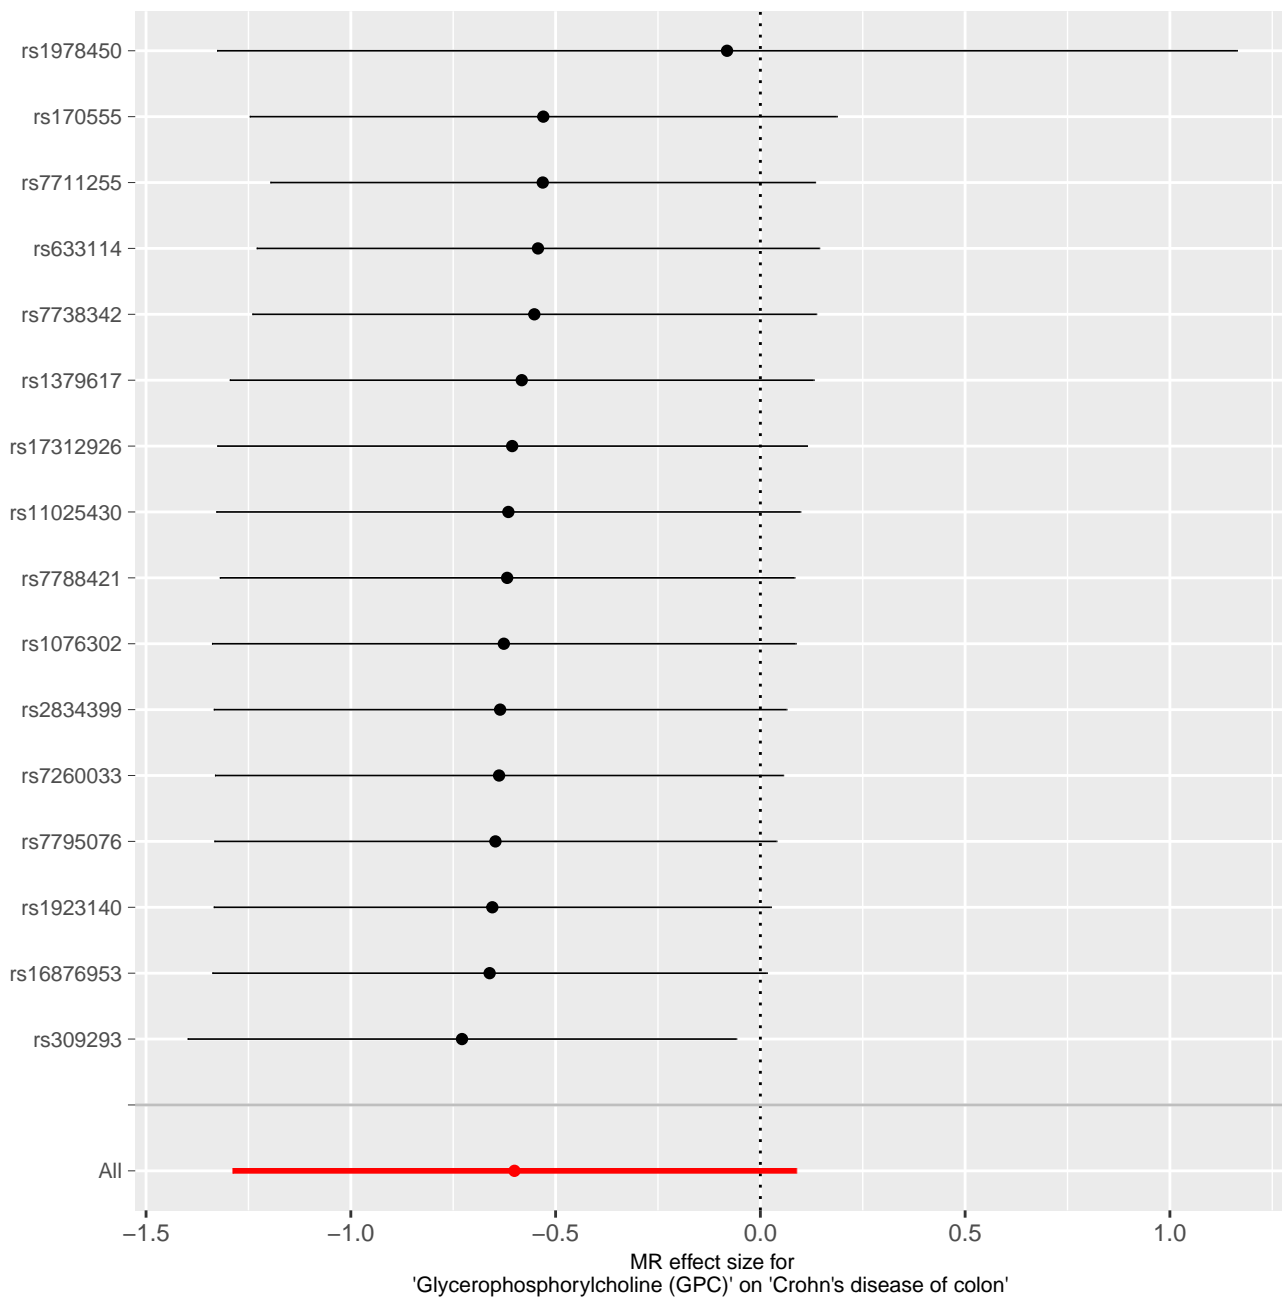



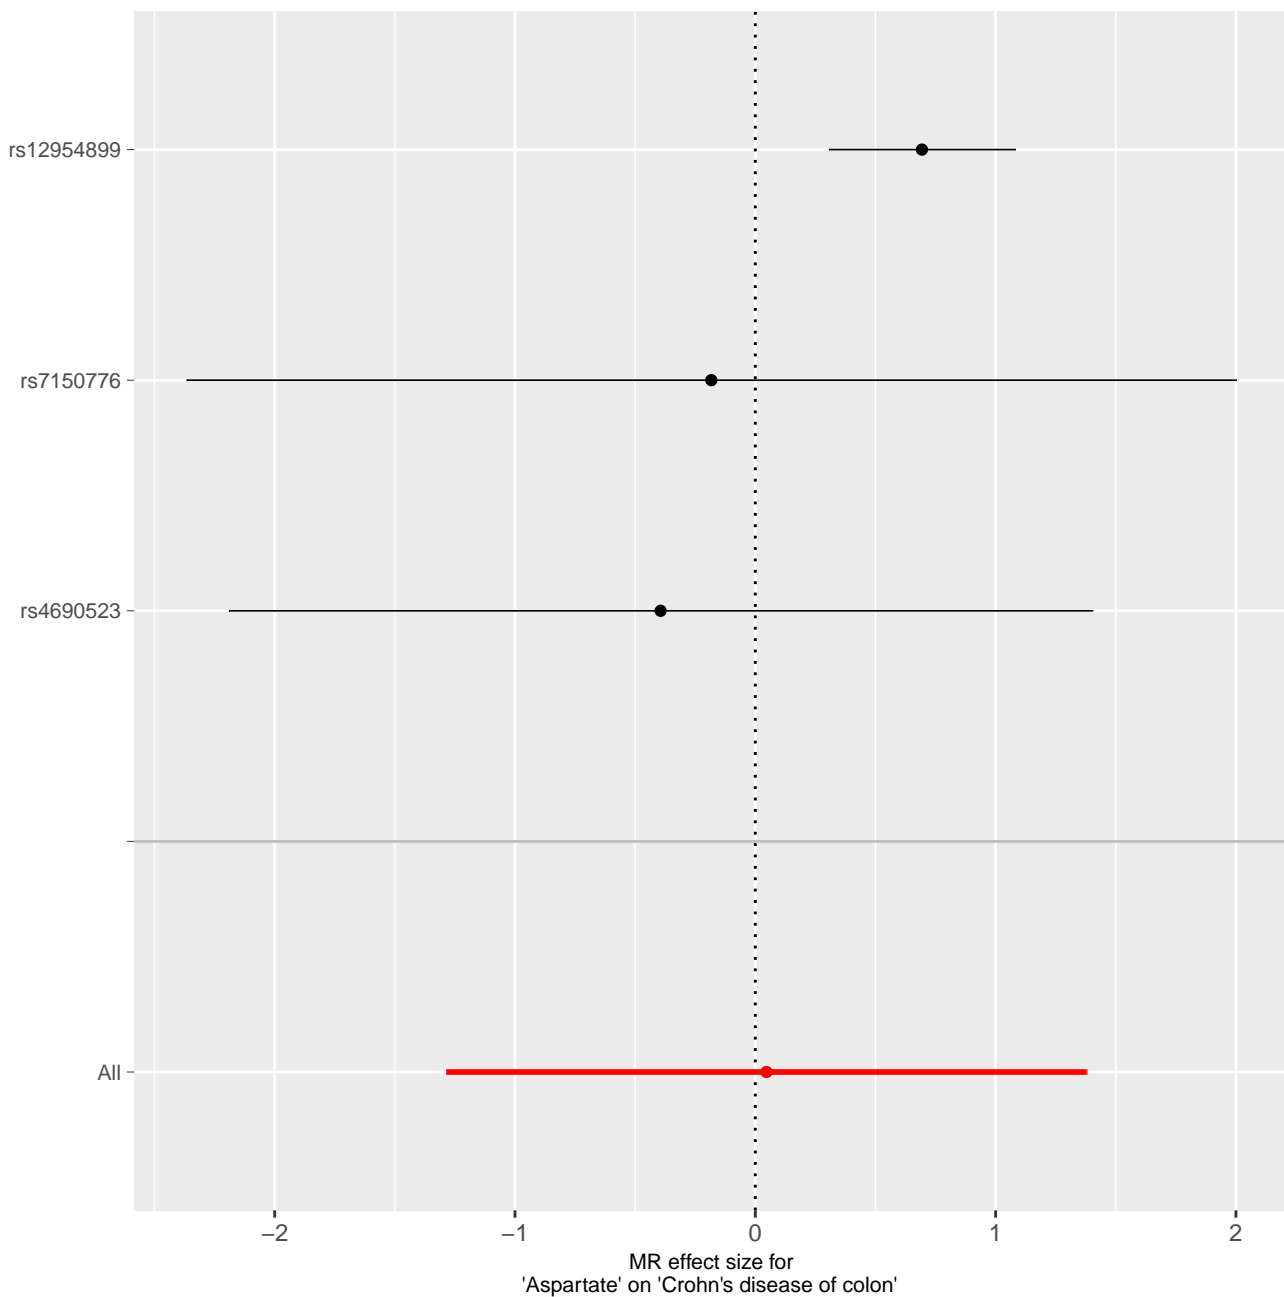

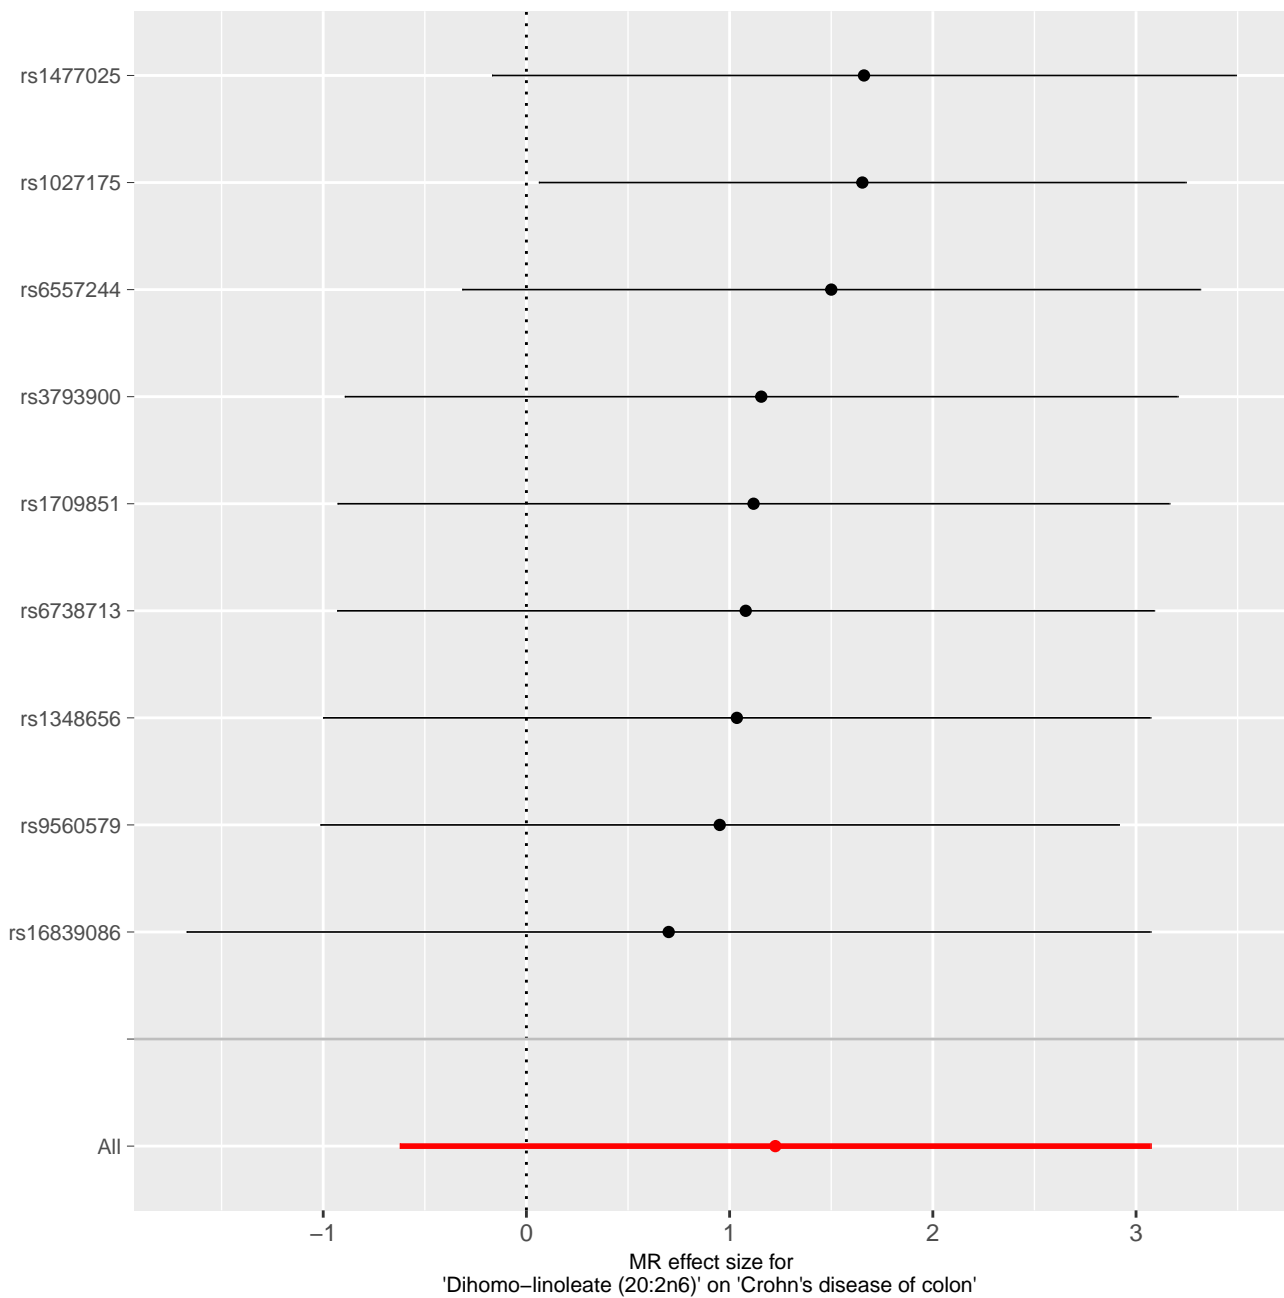

Batch 85 : 2-hydroxystearate on Crohn's disease of colon

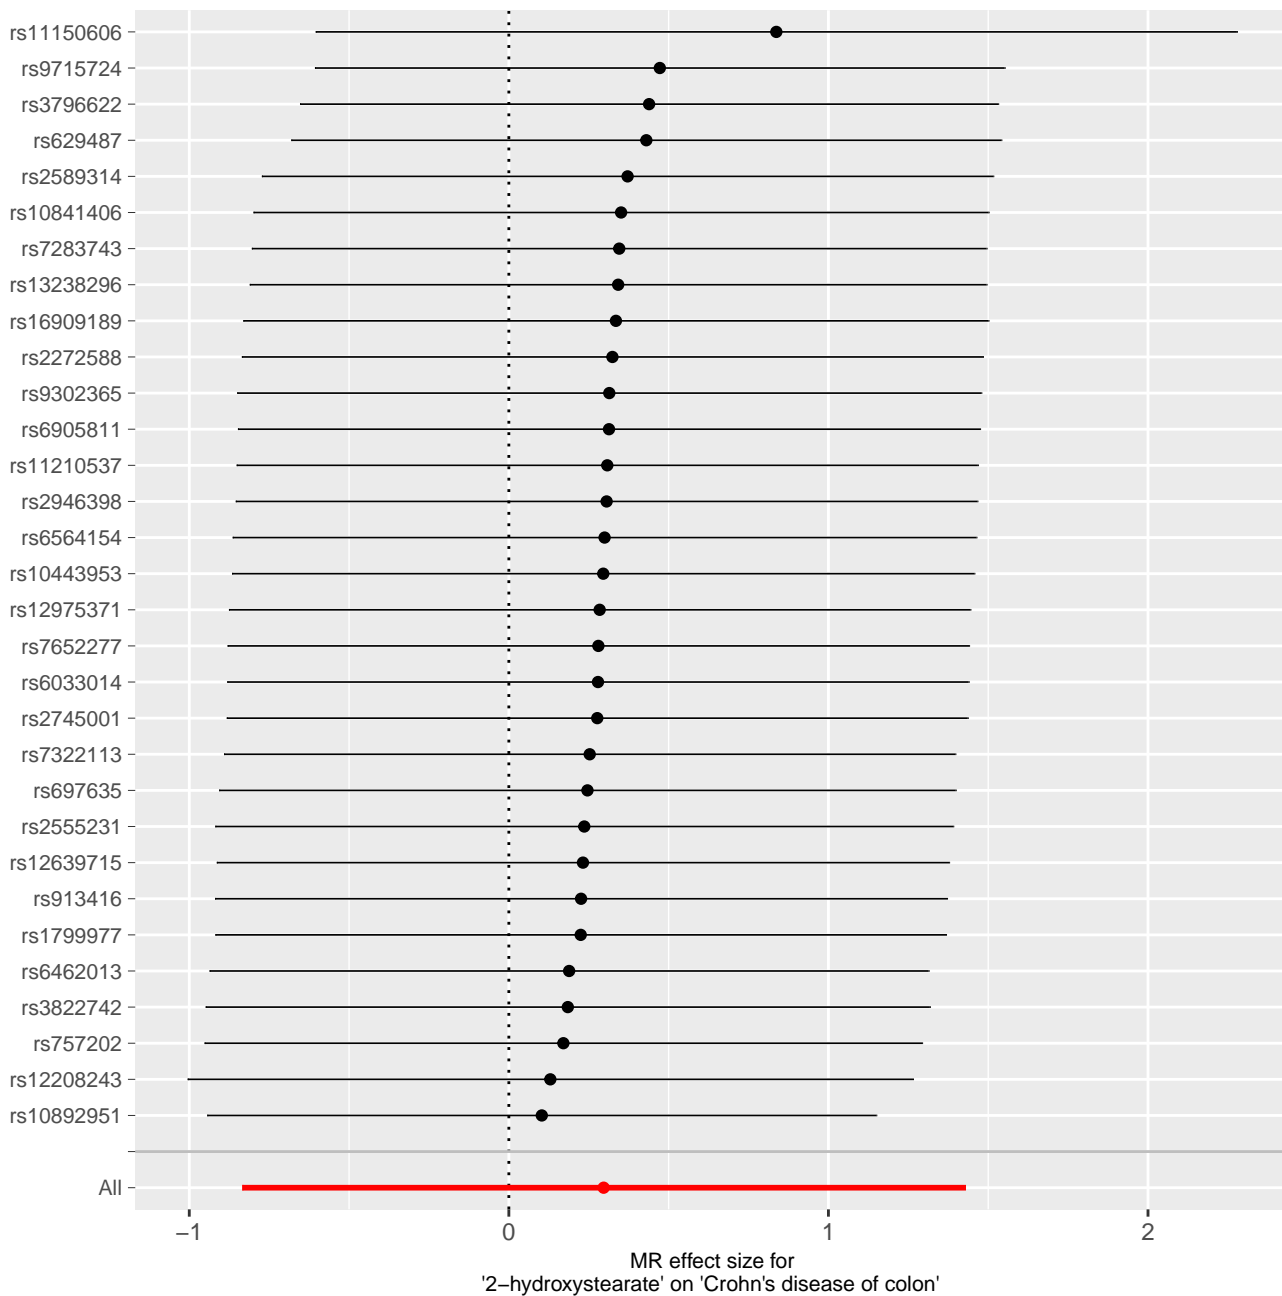

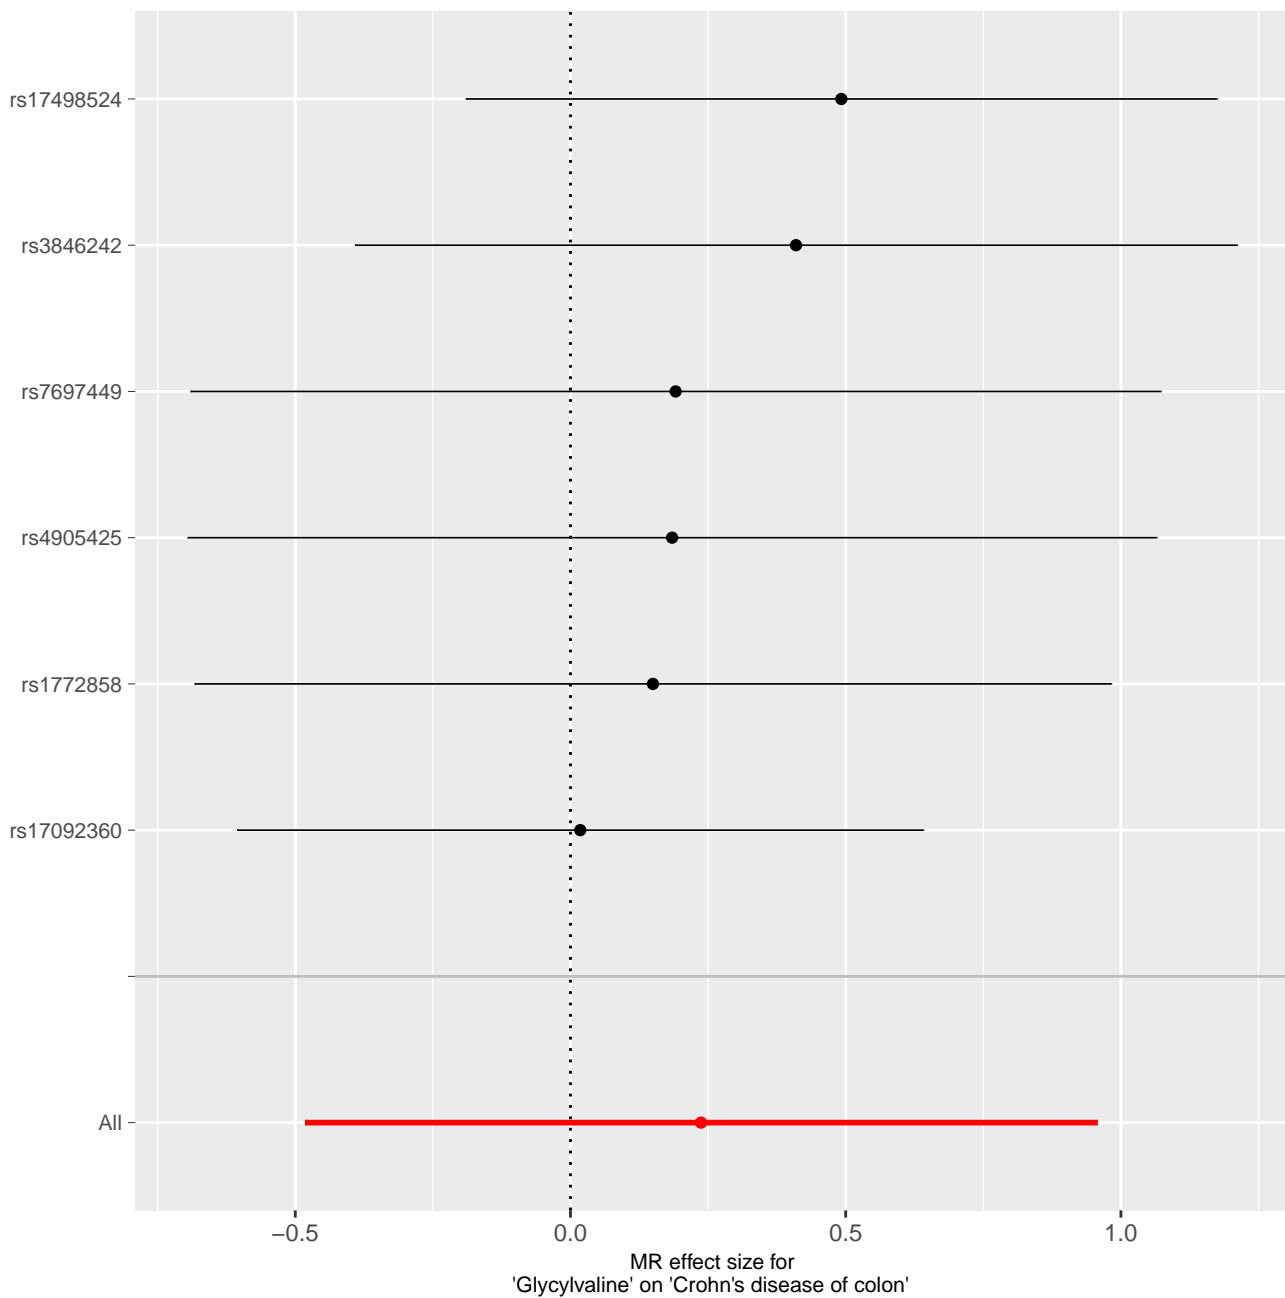

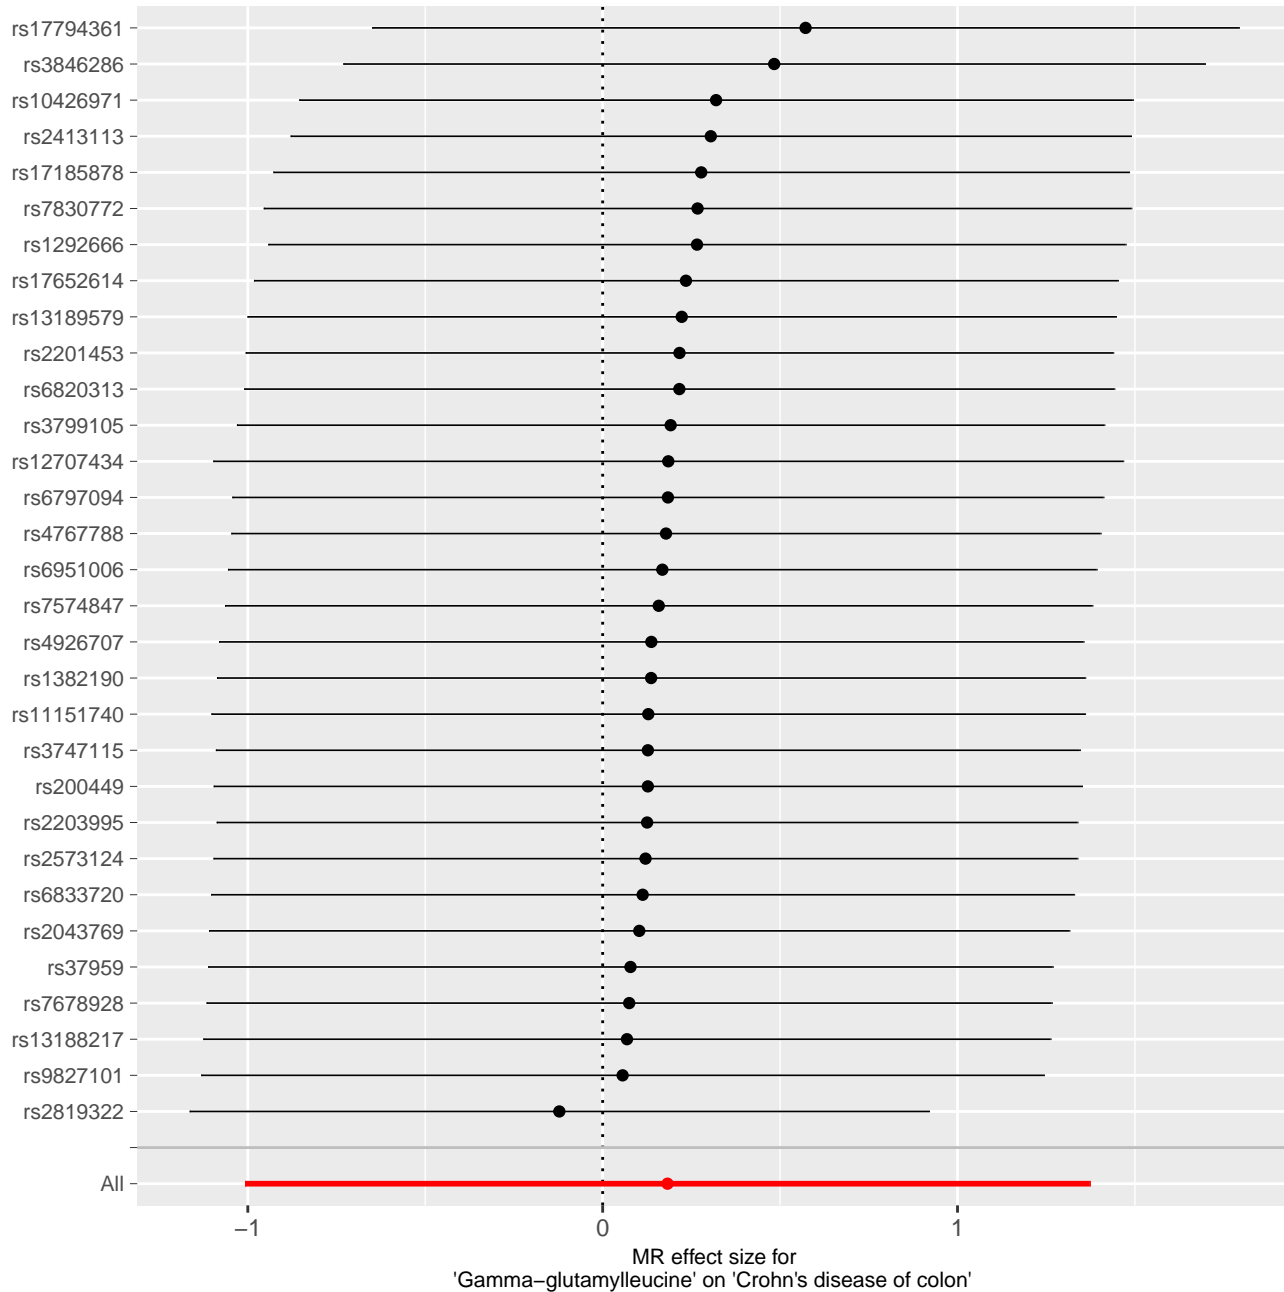

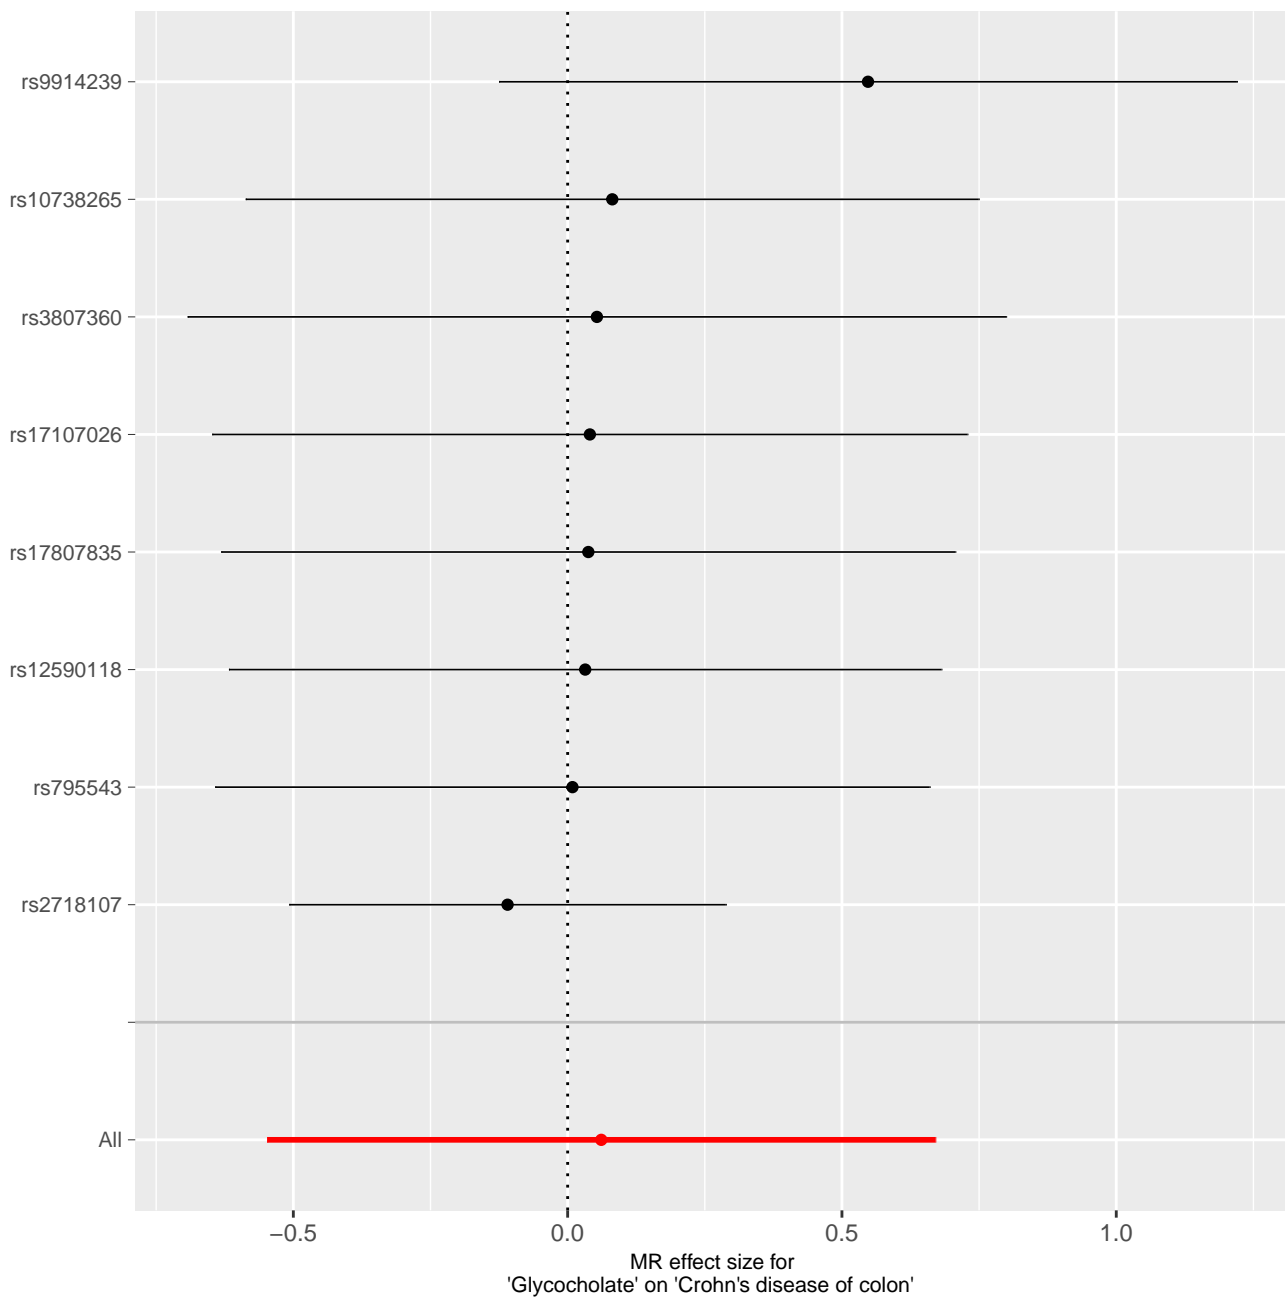

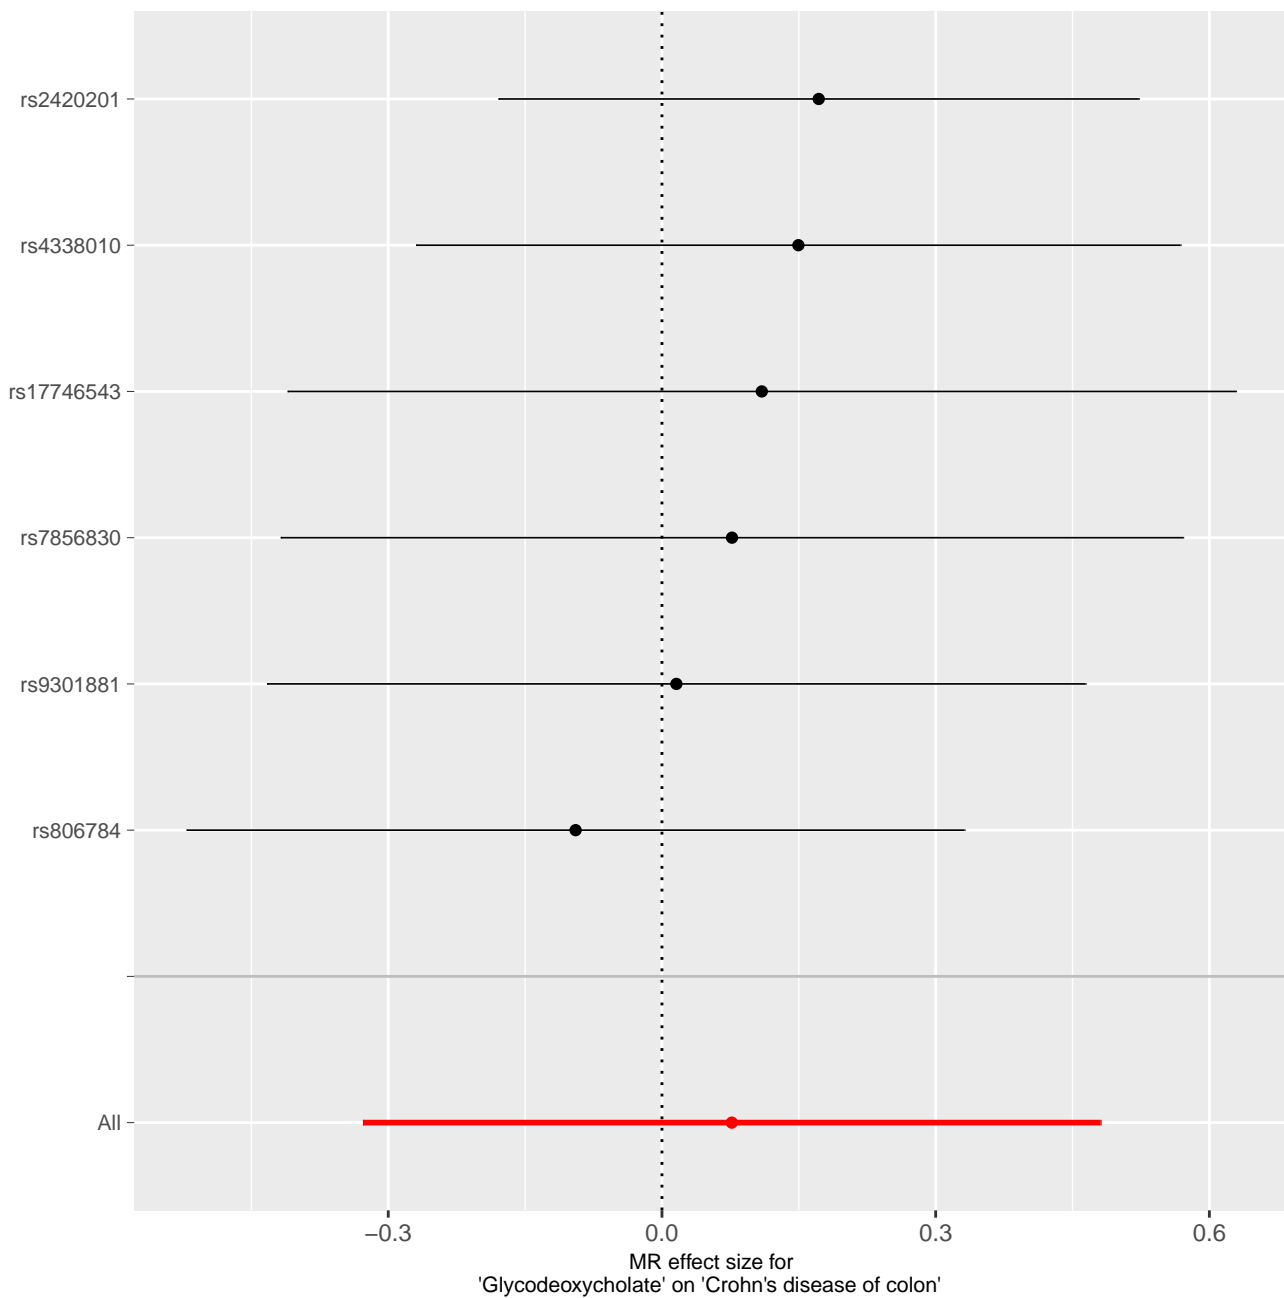

Batch 93 : Taurochenodeoxycholate on Crohn's disease of colon

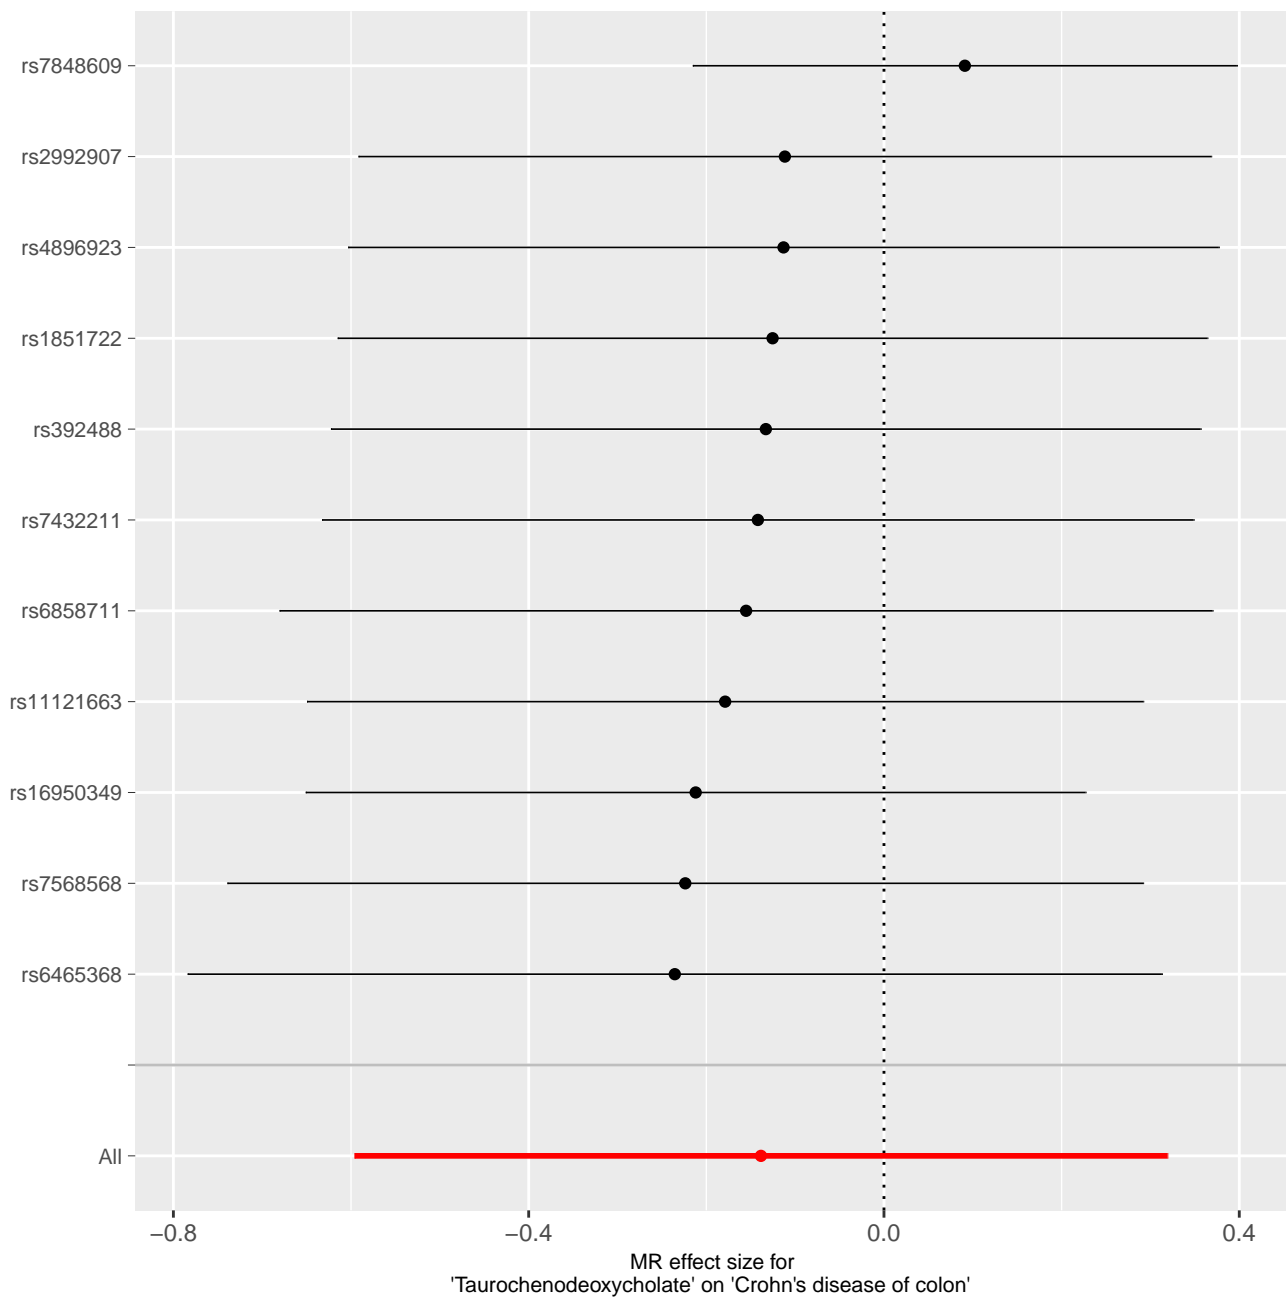



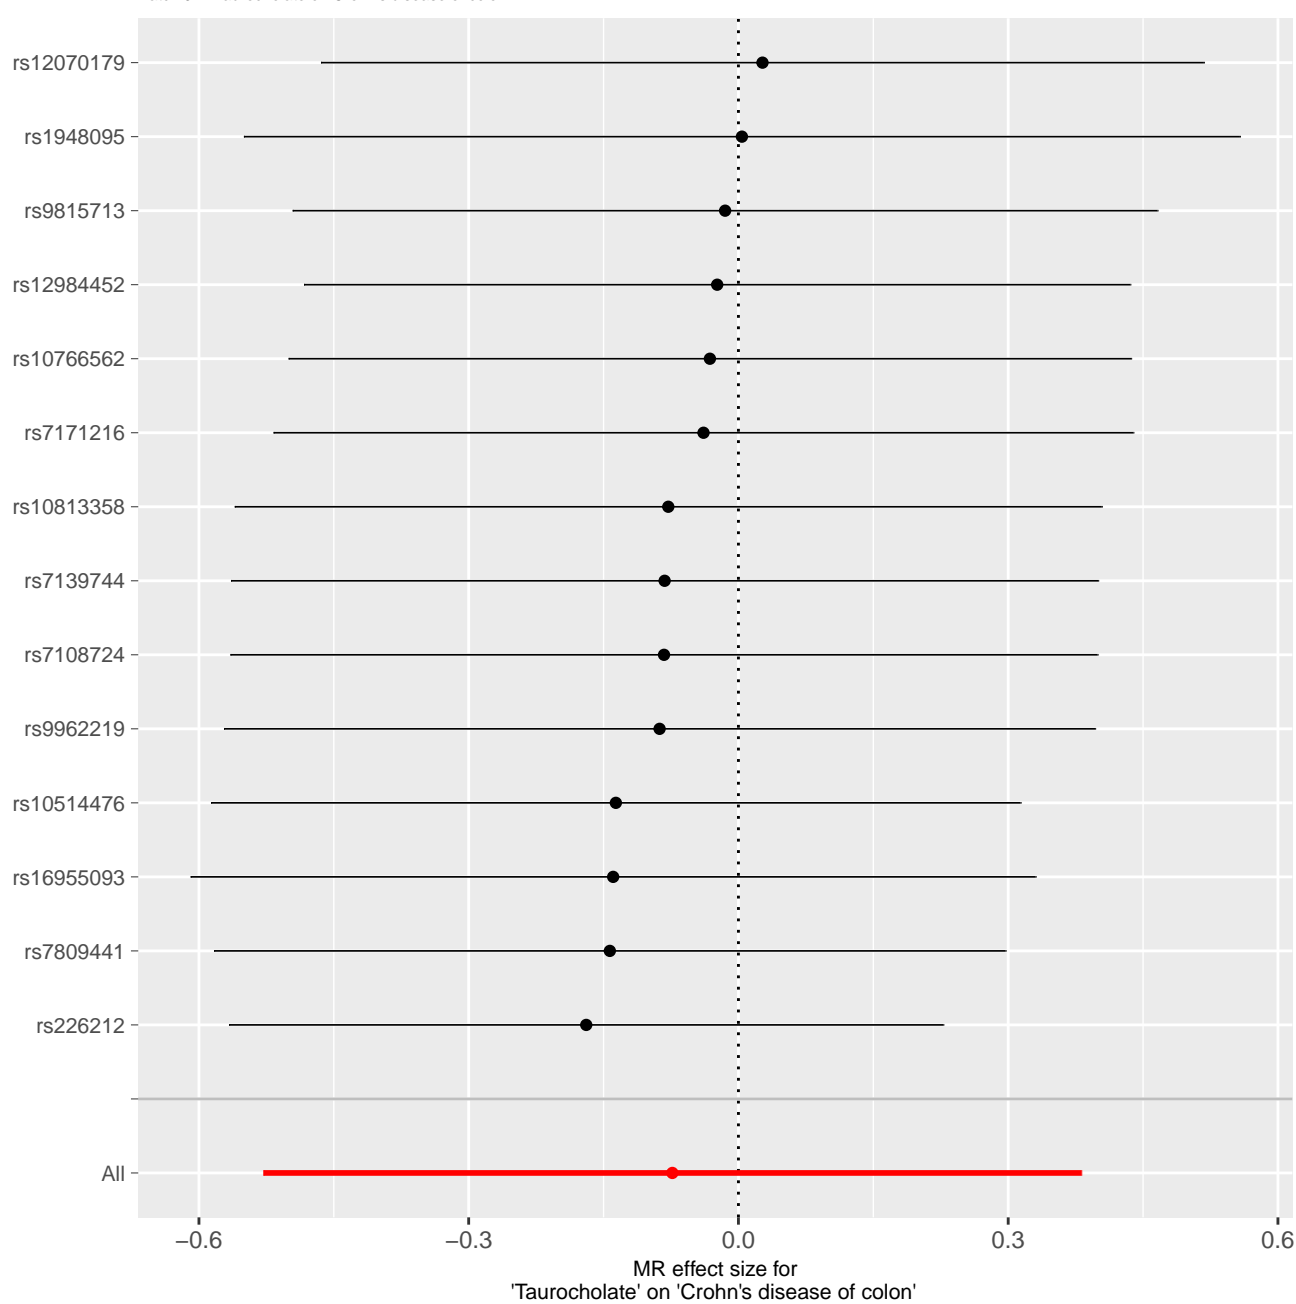

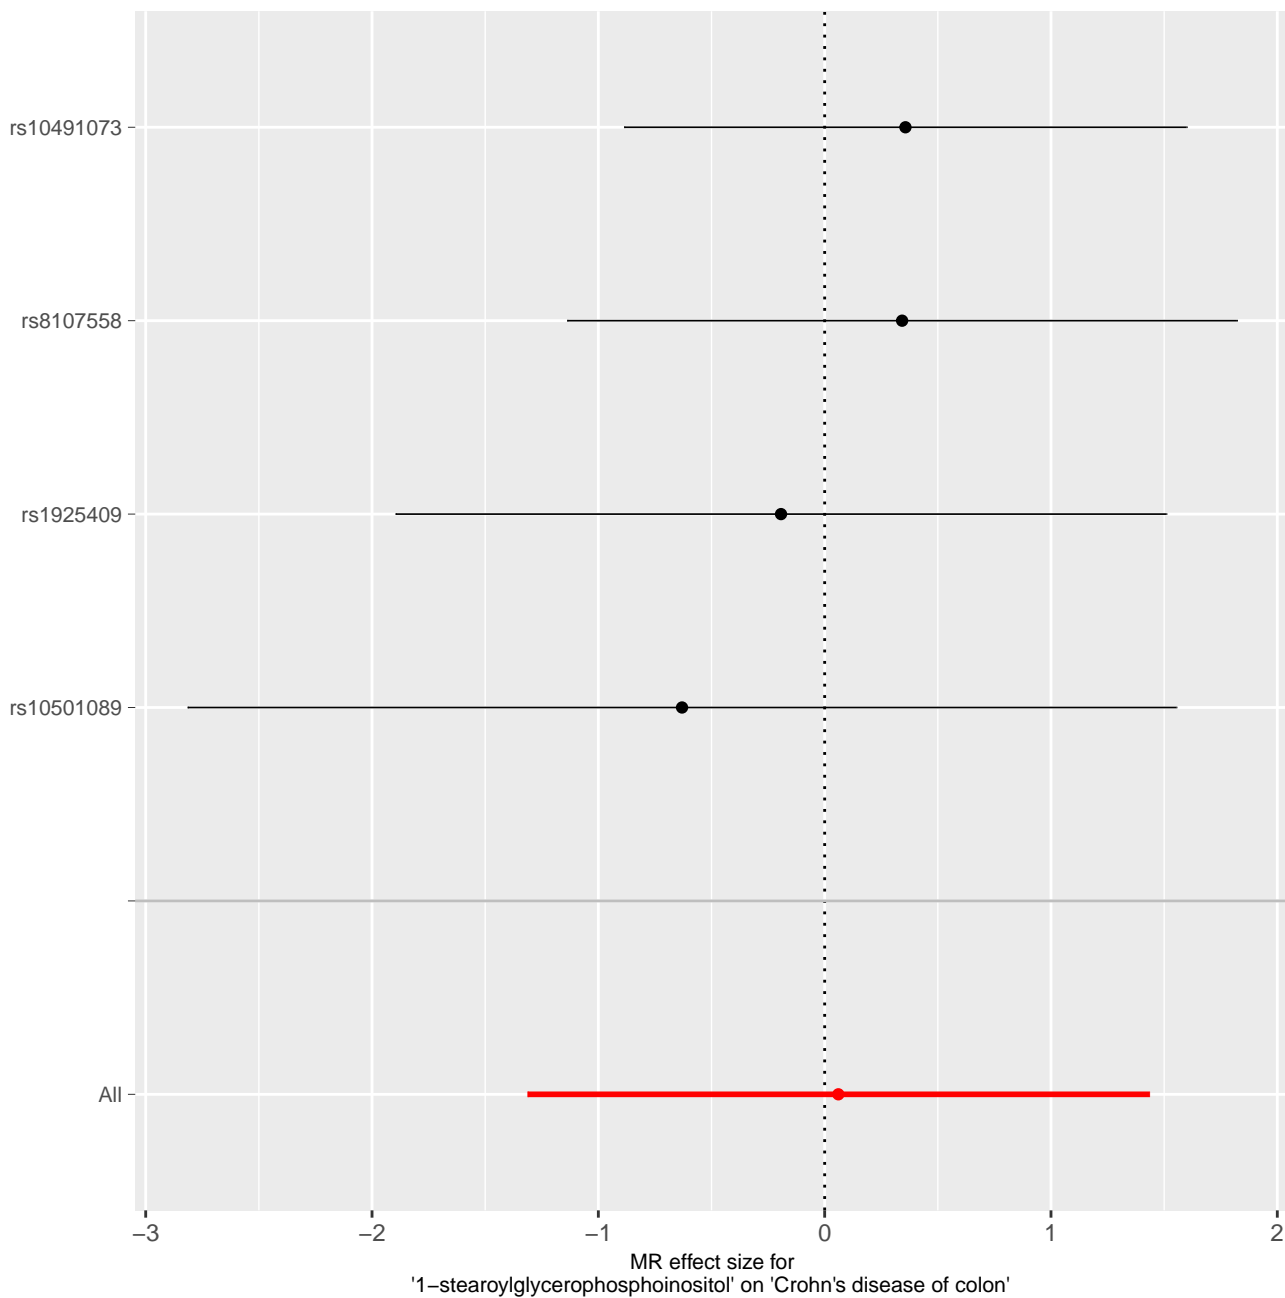

Batch 99 : 1,5-anhydroglucitol (1,5-AG) on Crohn's disease of colon

rs9756306

rs7570971

rs3800993

All

-4

-2

0

2

4

6

MR effect size for

'1,5-anhydroglucitol (1,5-AG)' on 'Crohn's disease of colon'

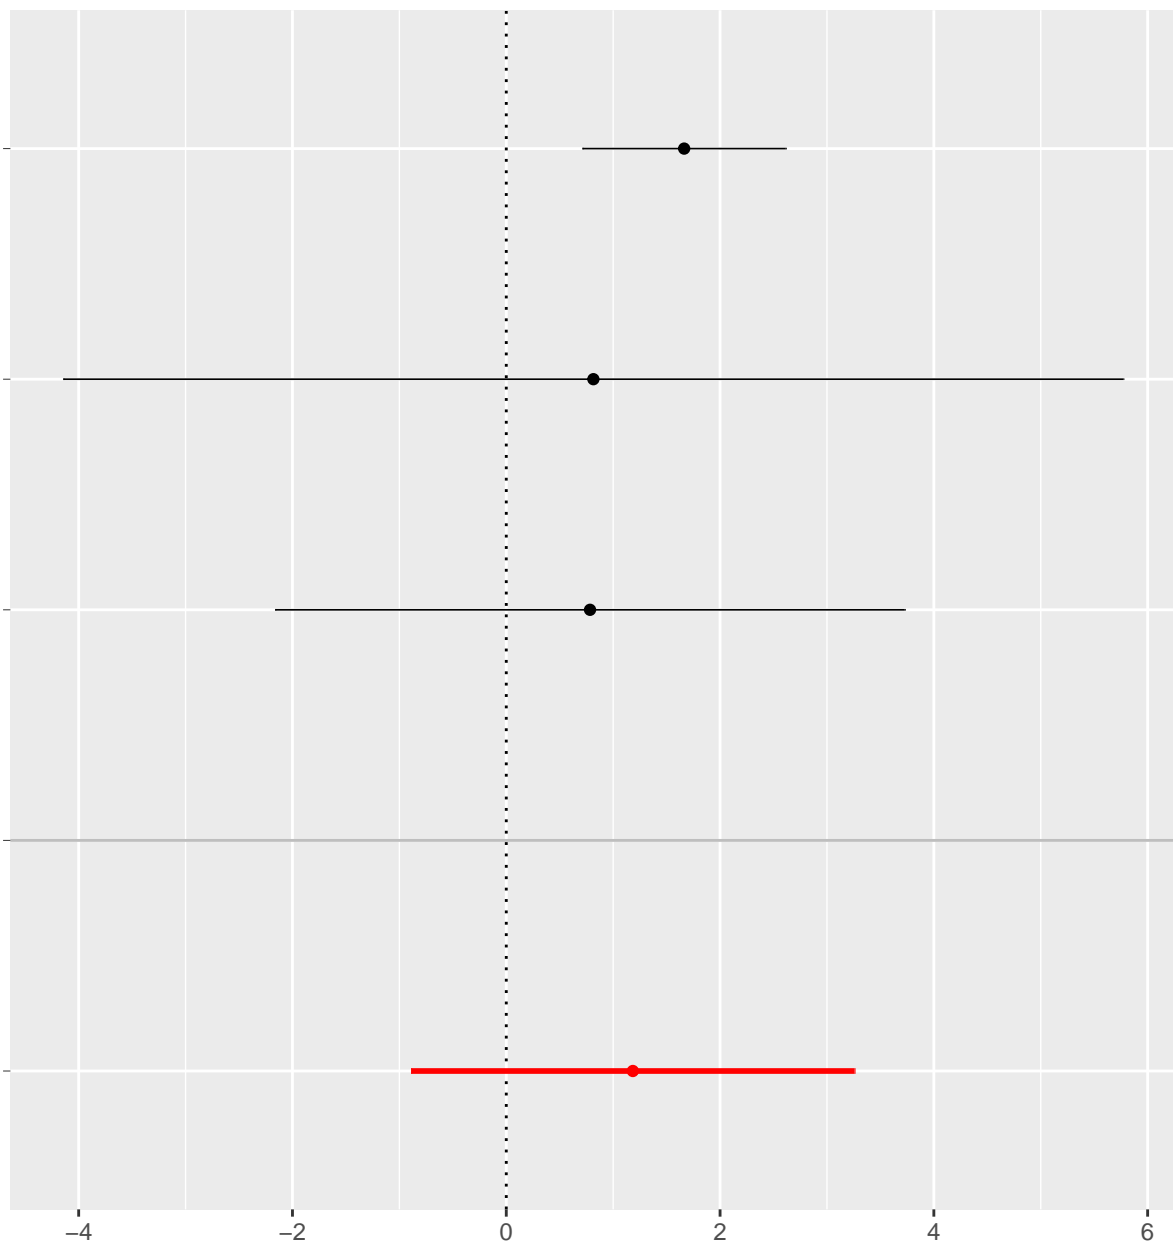

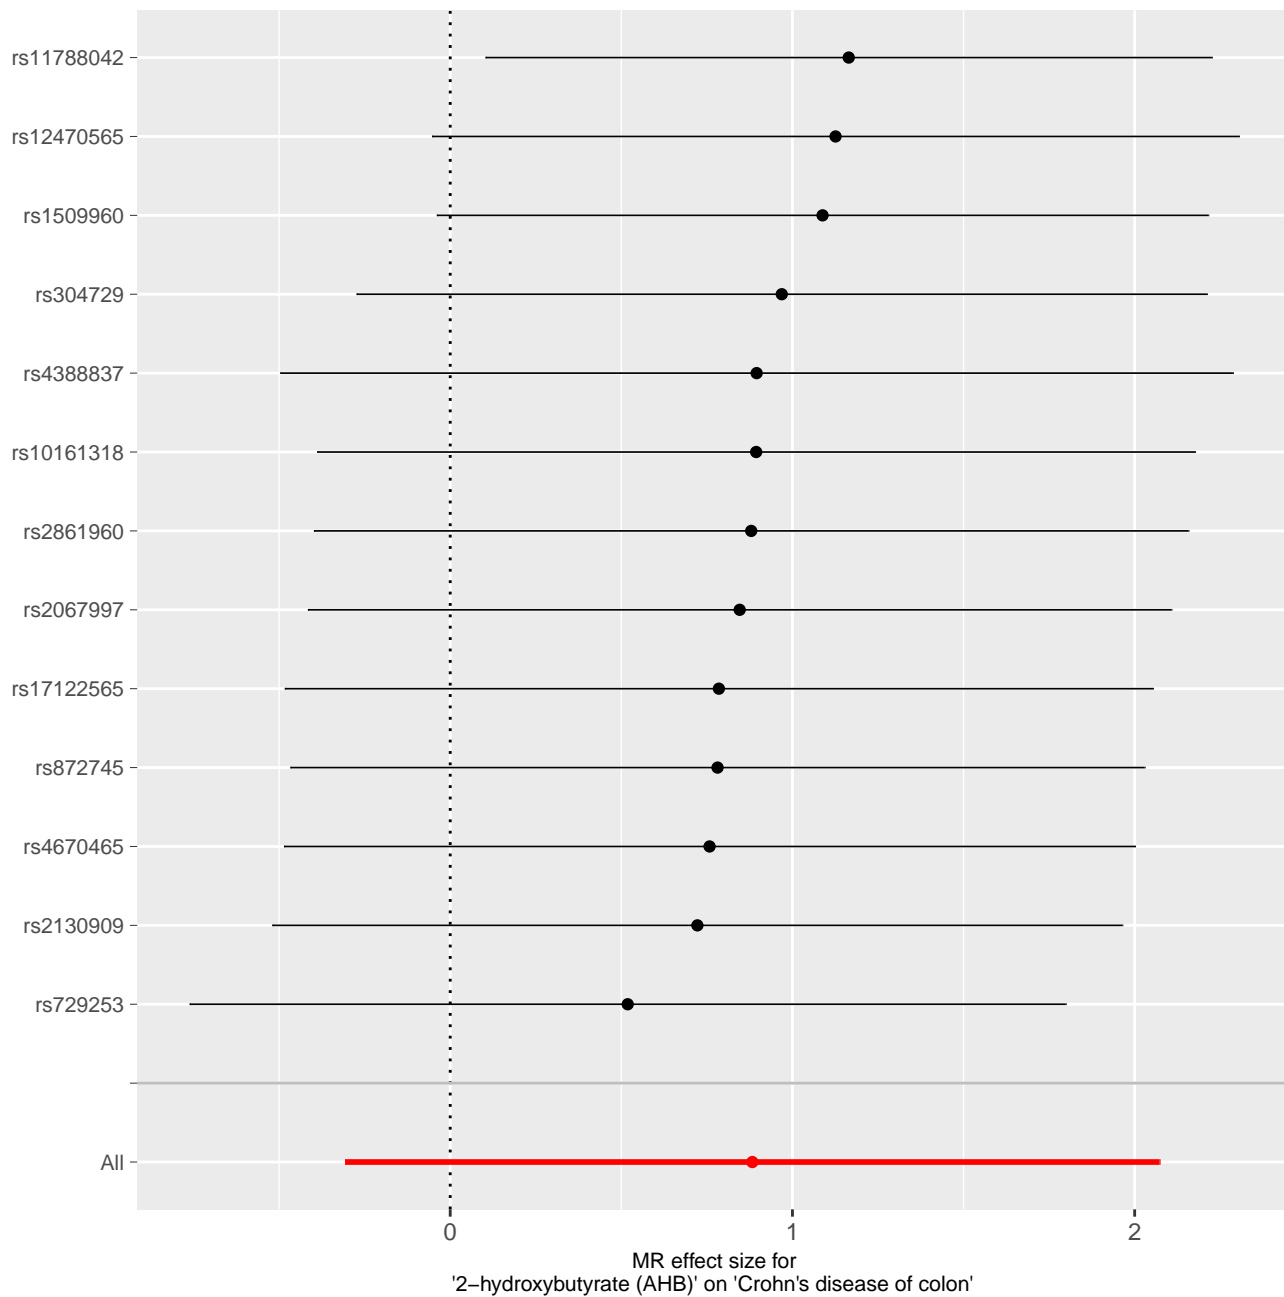

Batch 103 : 1-palmitoylglycerol (1-monopalmitin) on Crohn's disease of colon

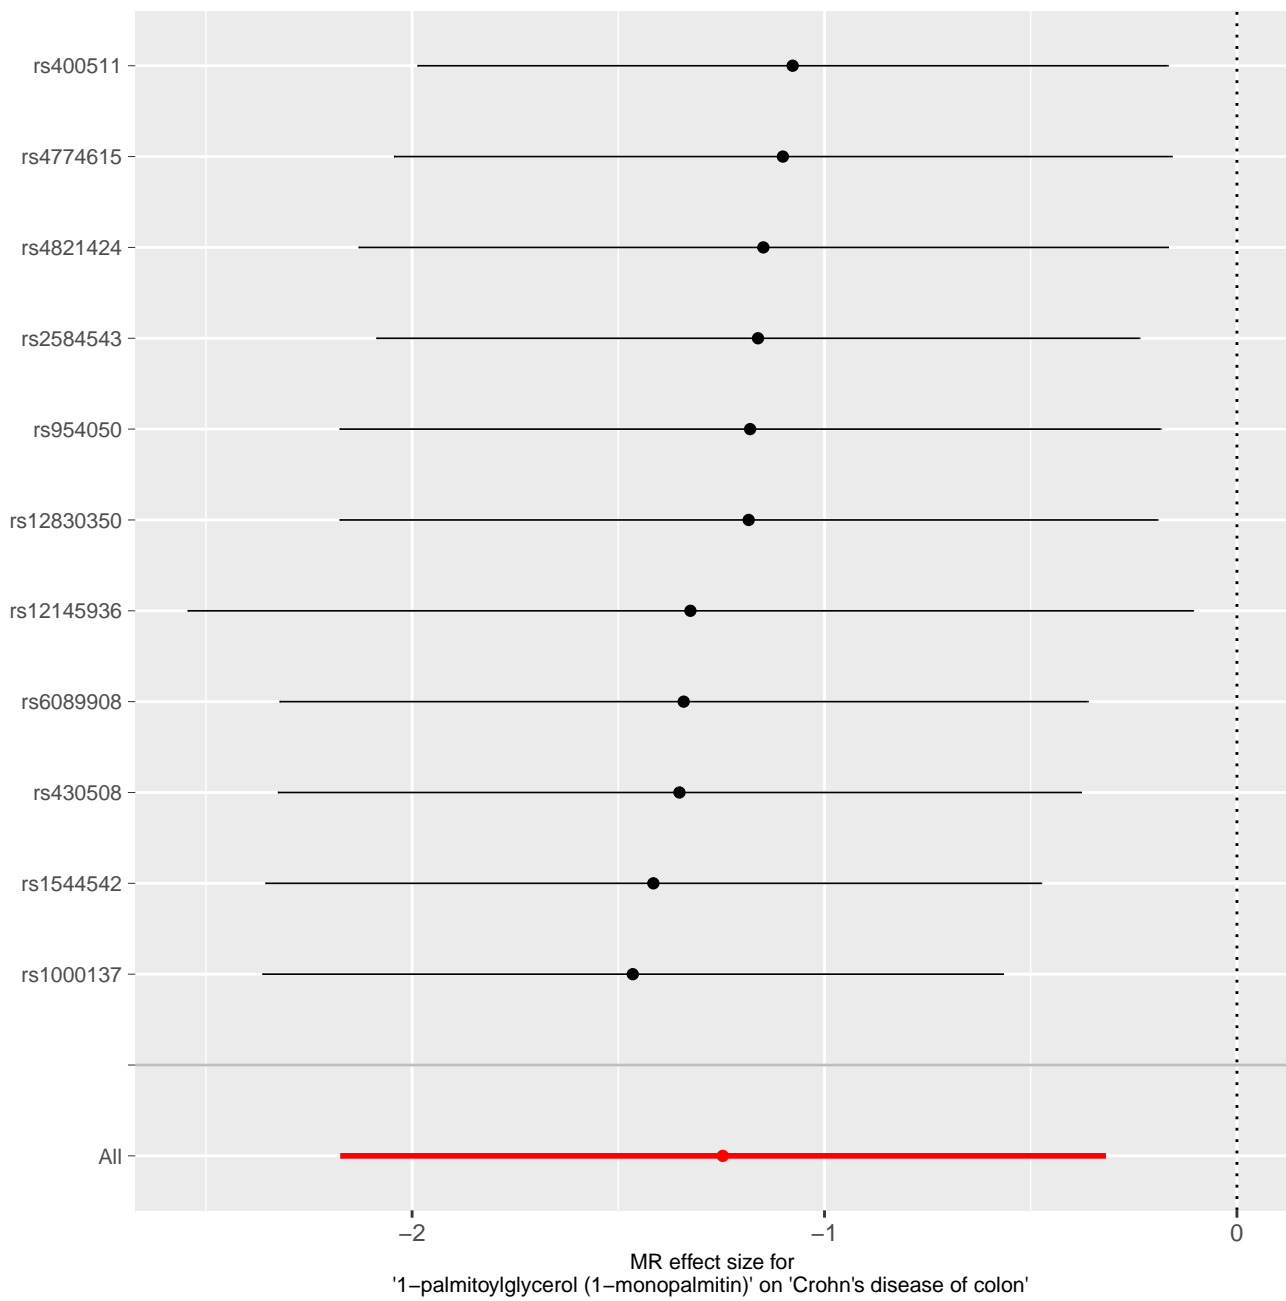

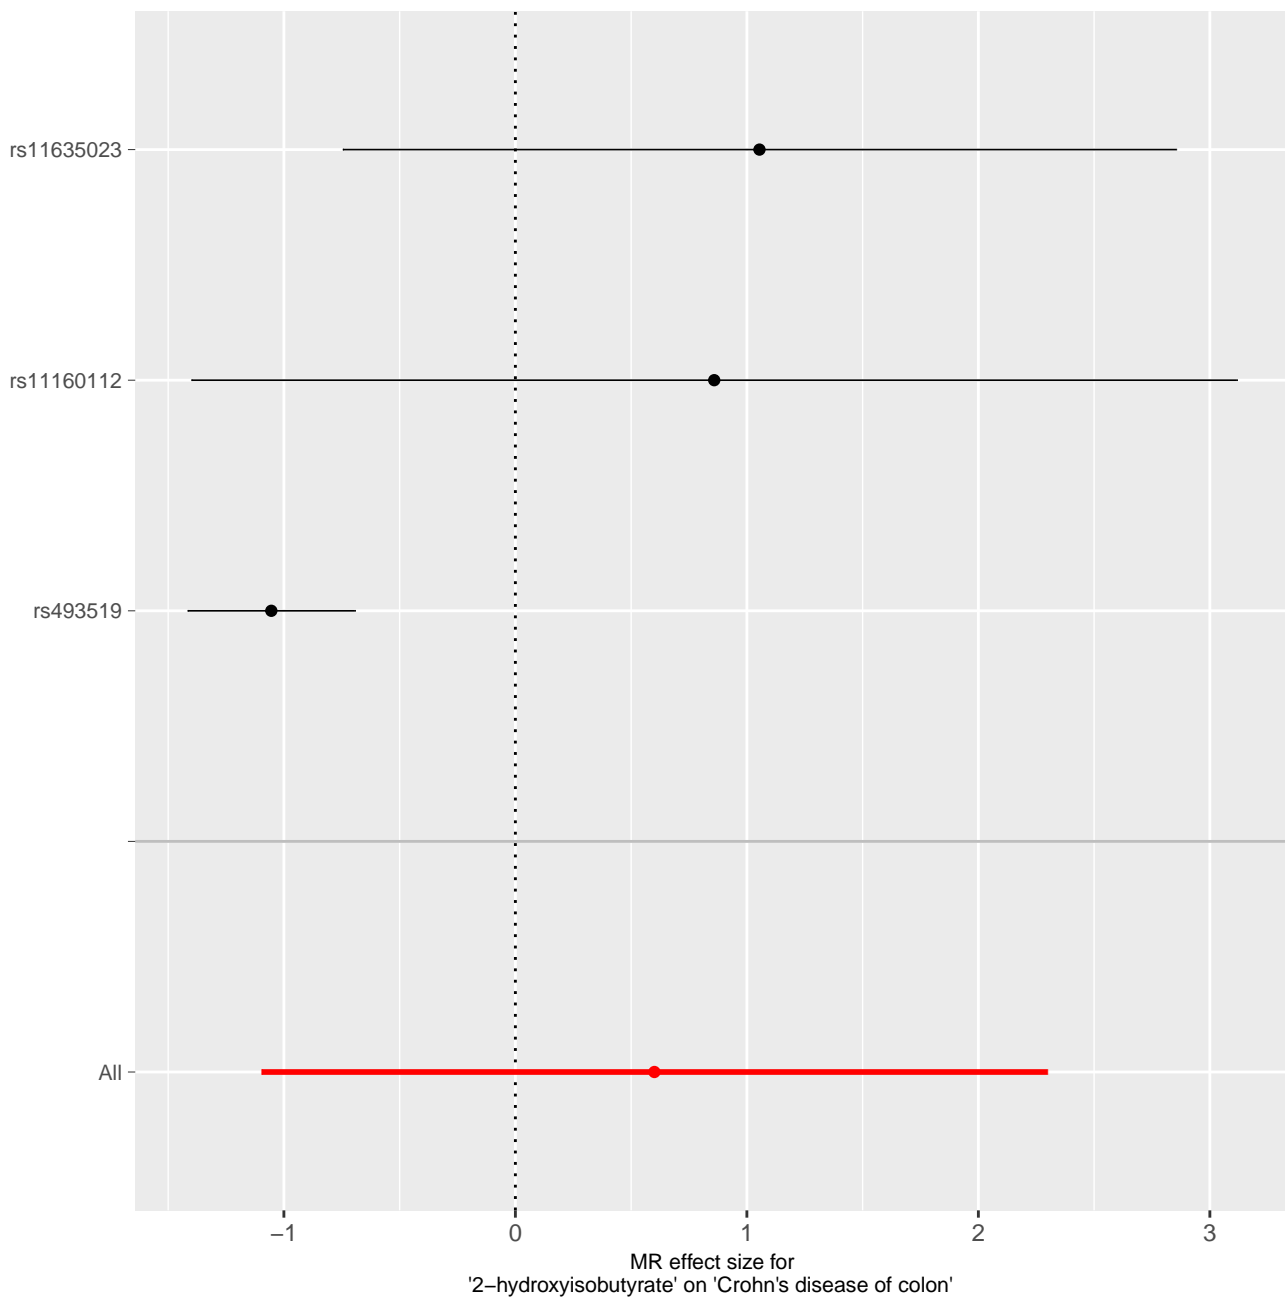

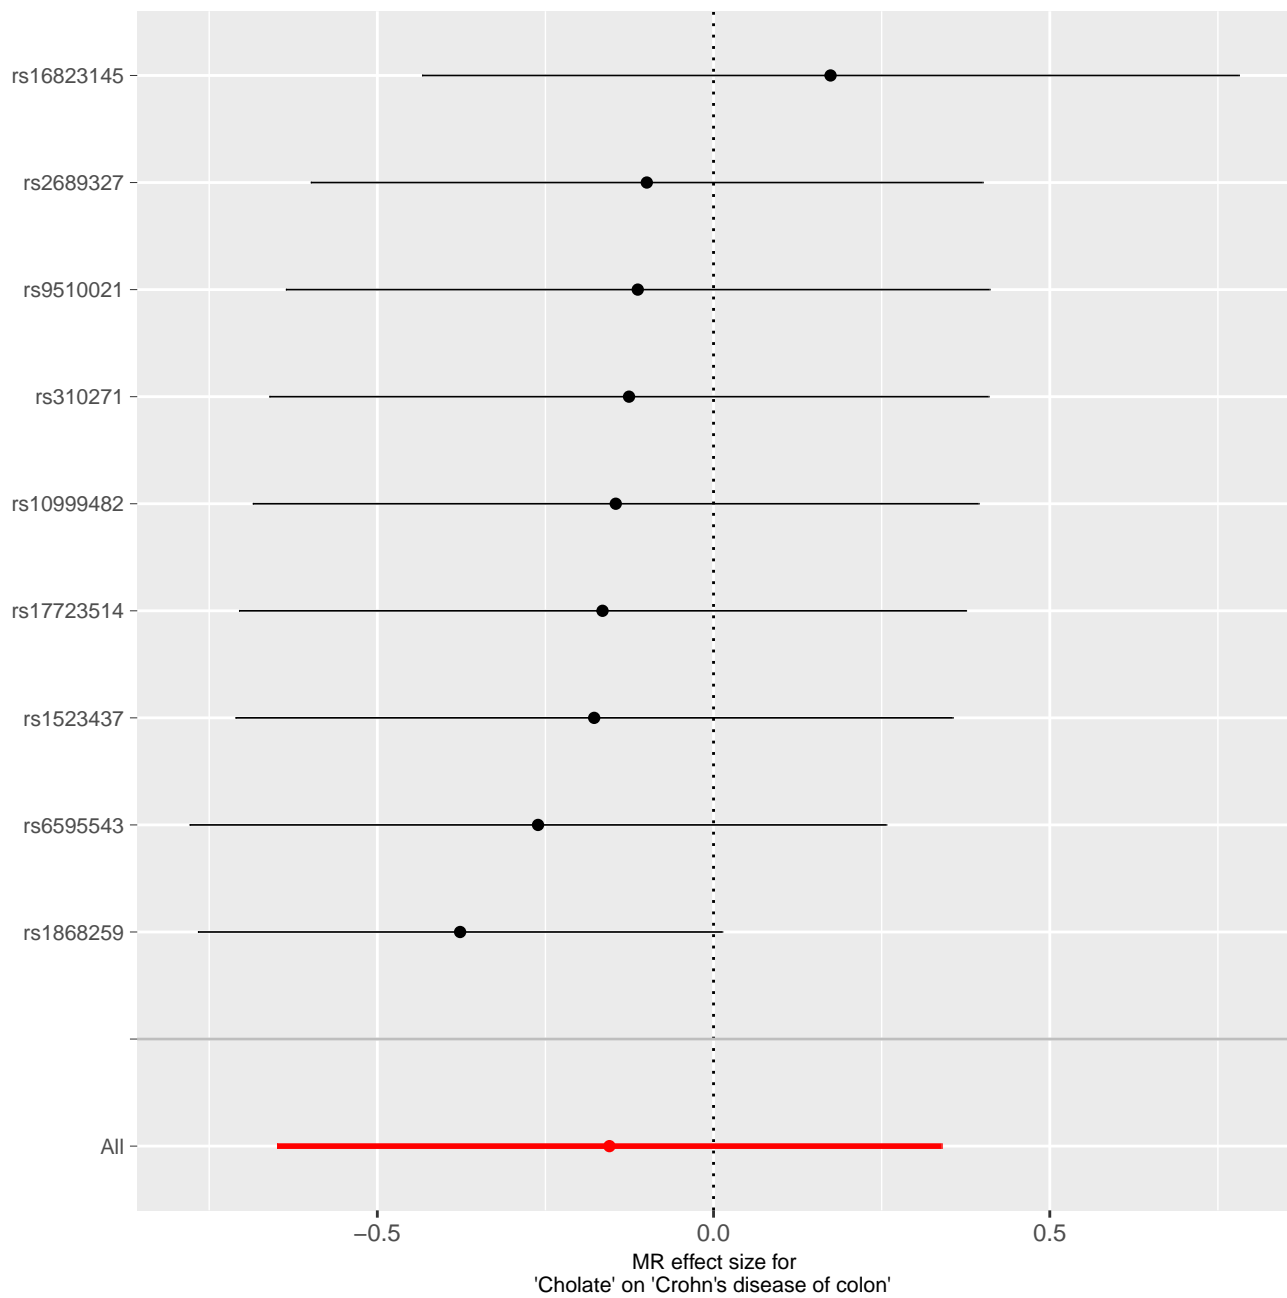

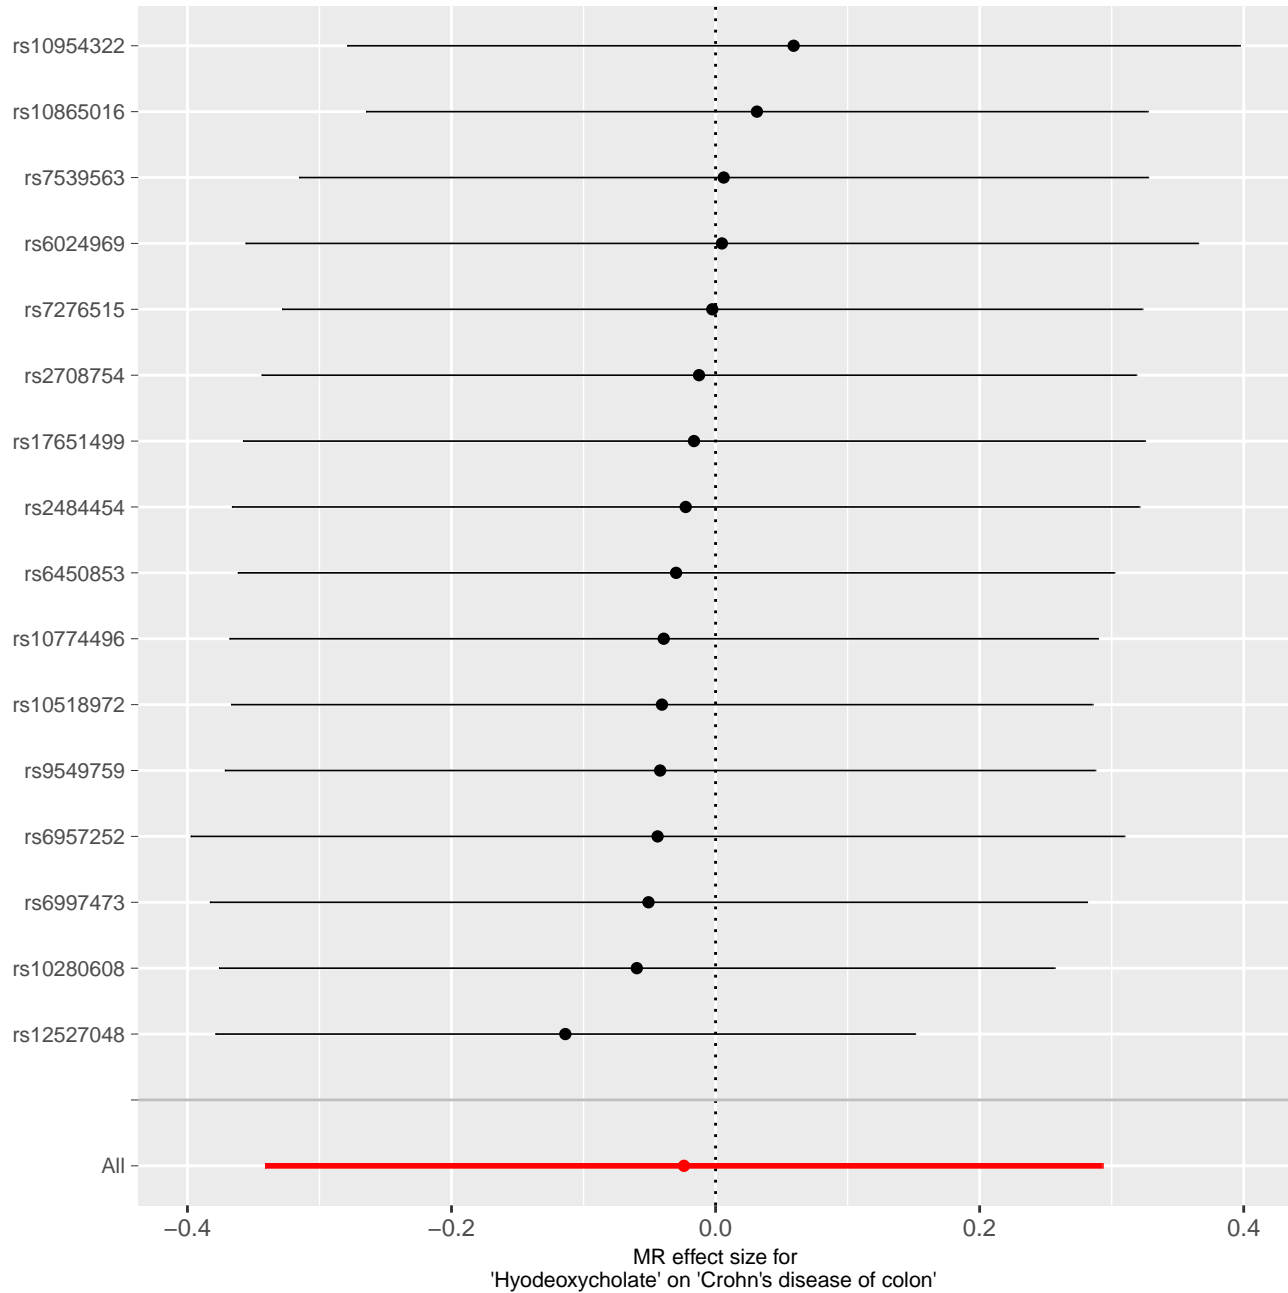



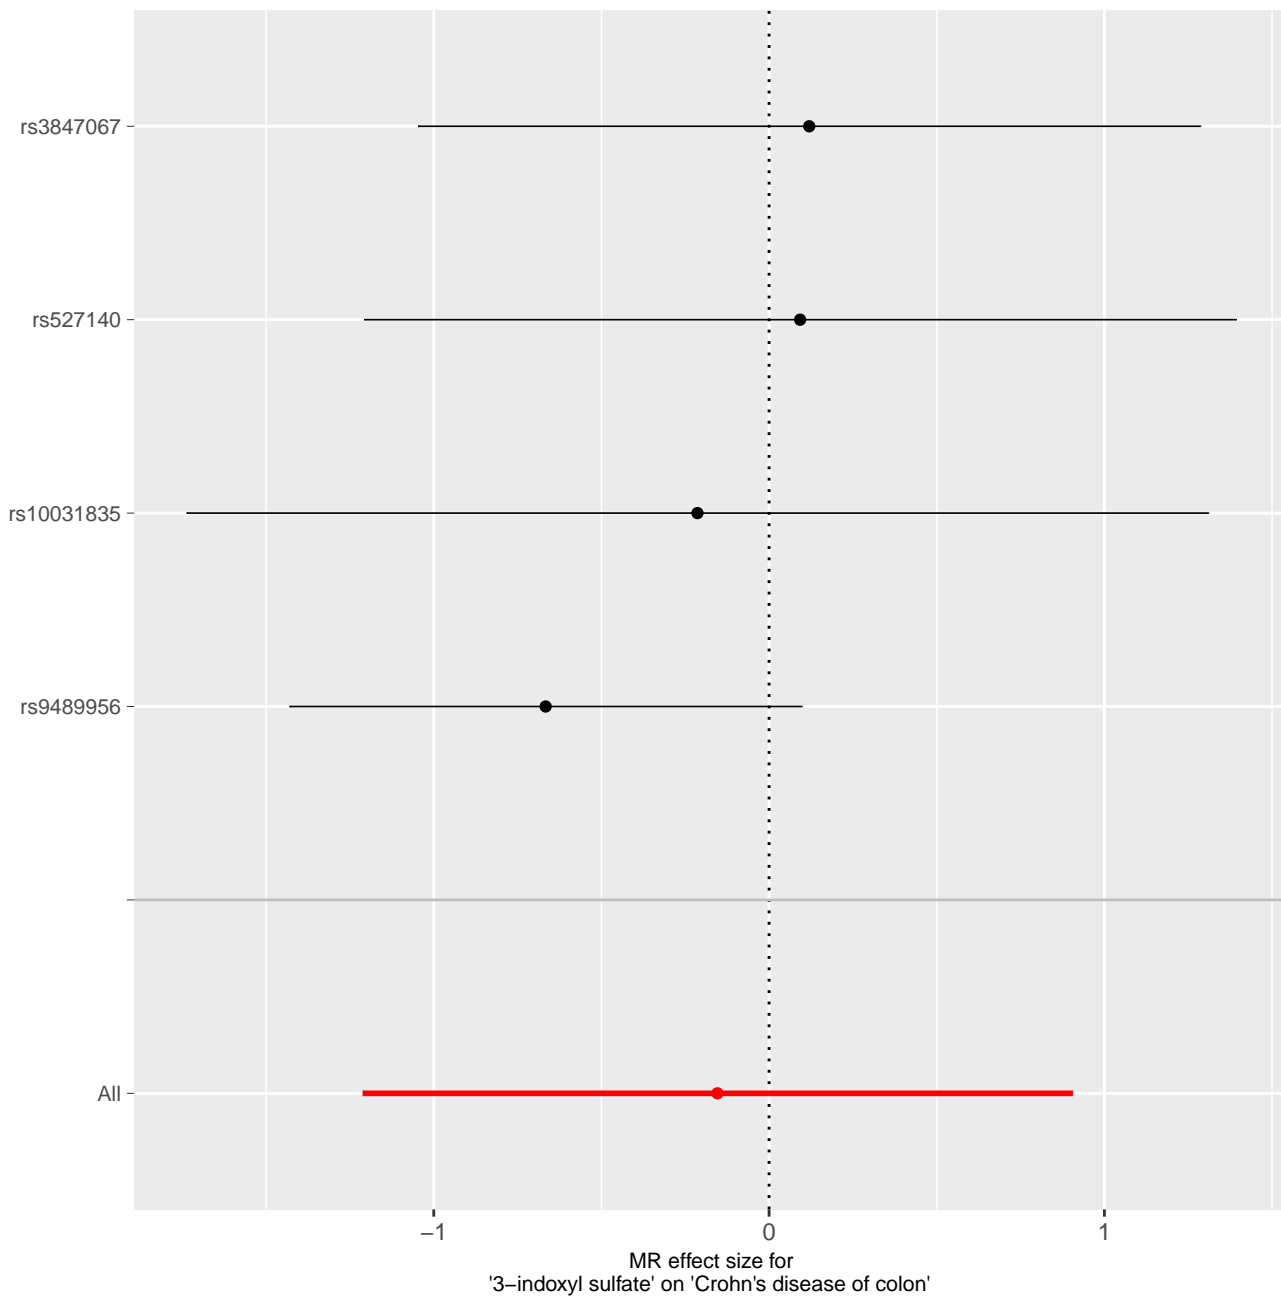

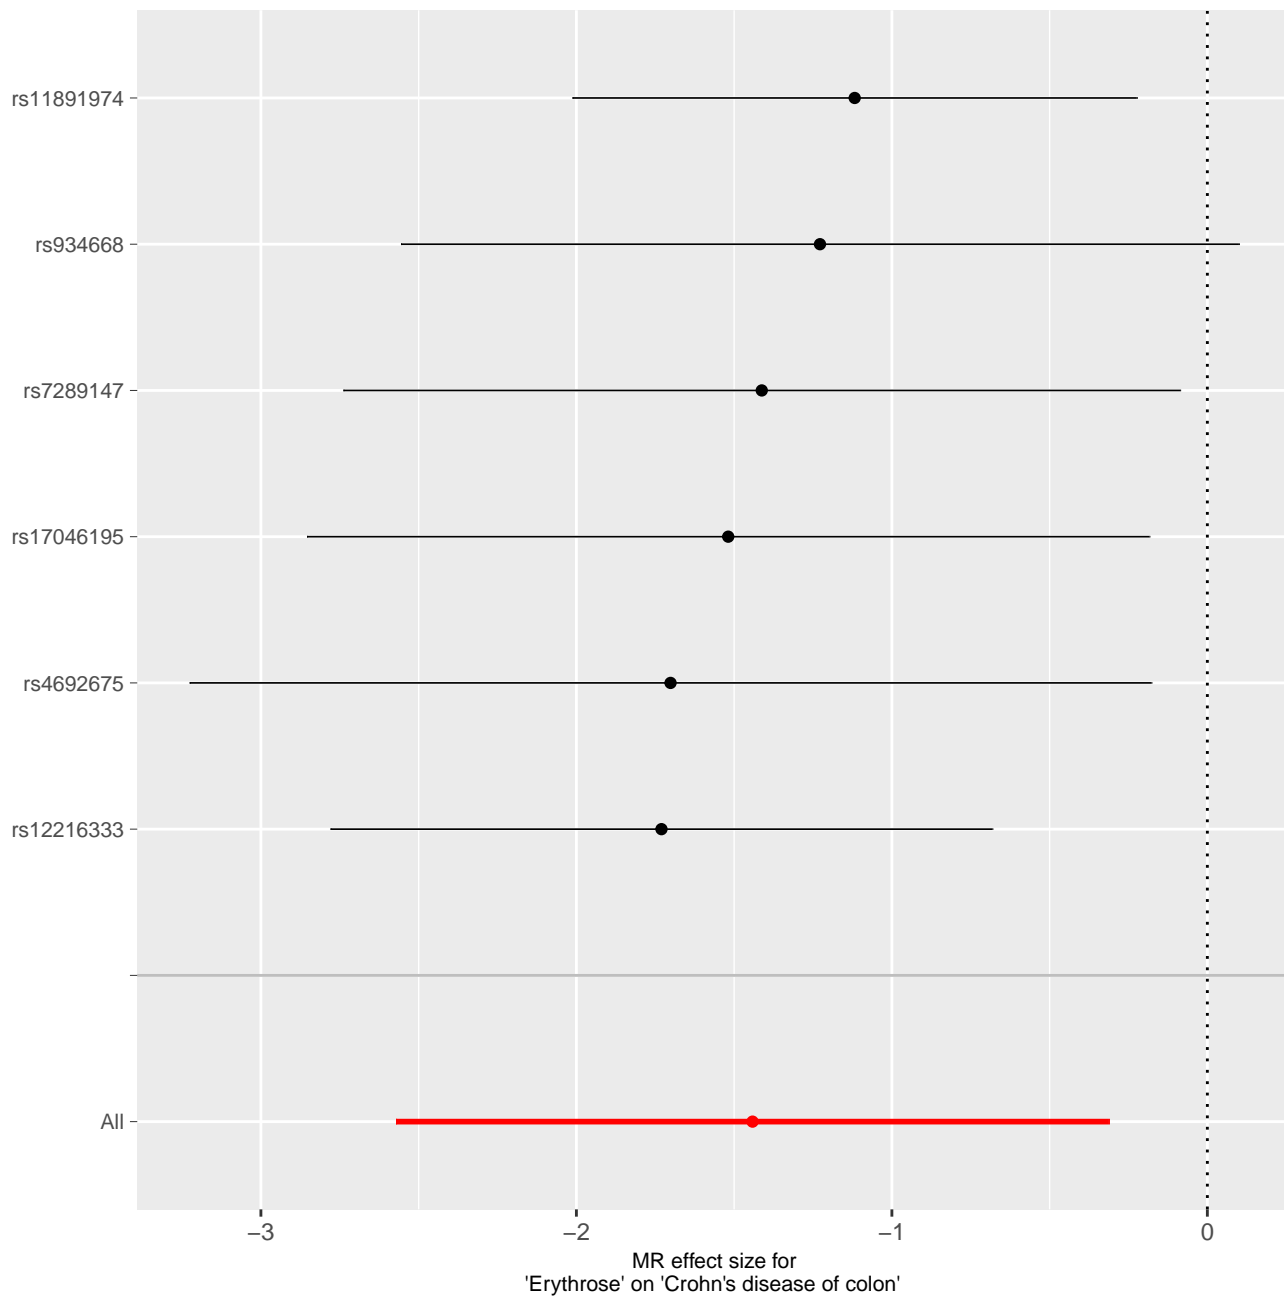

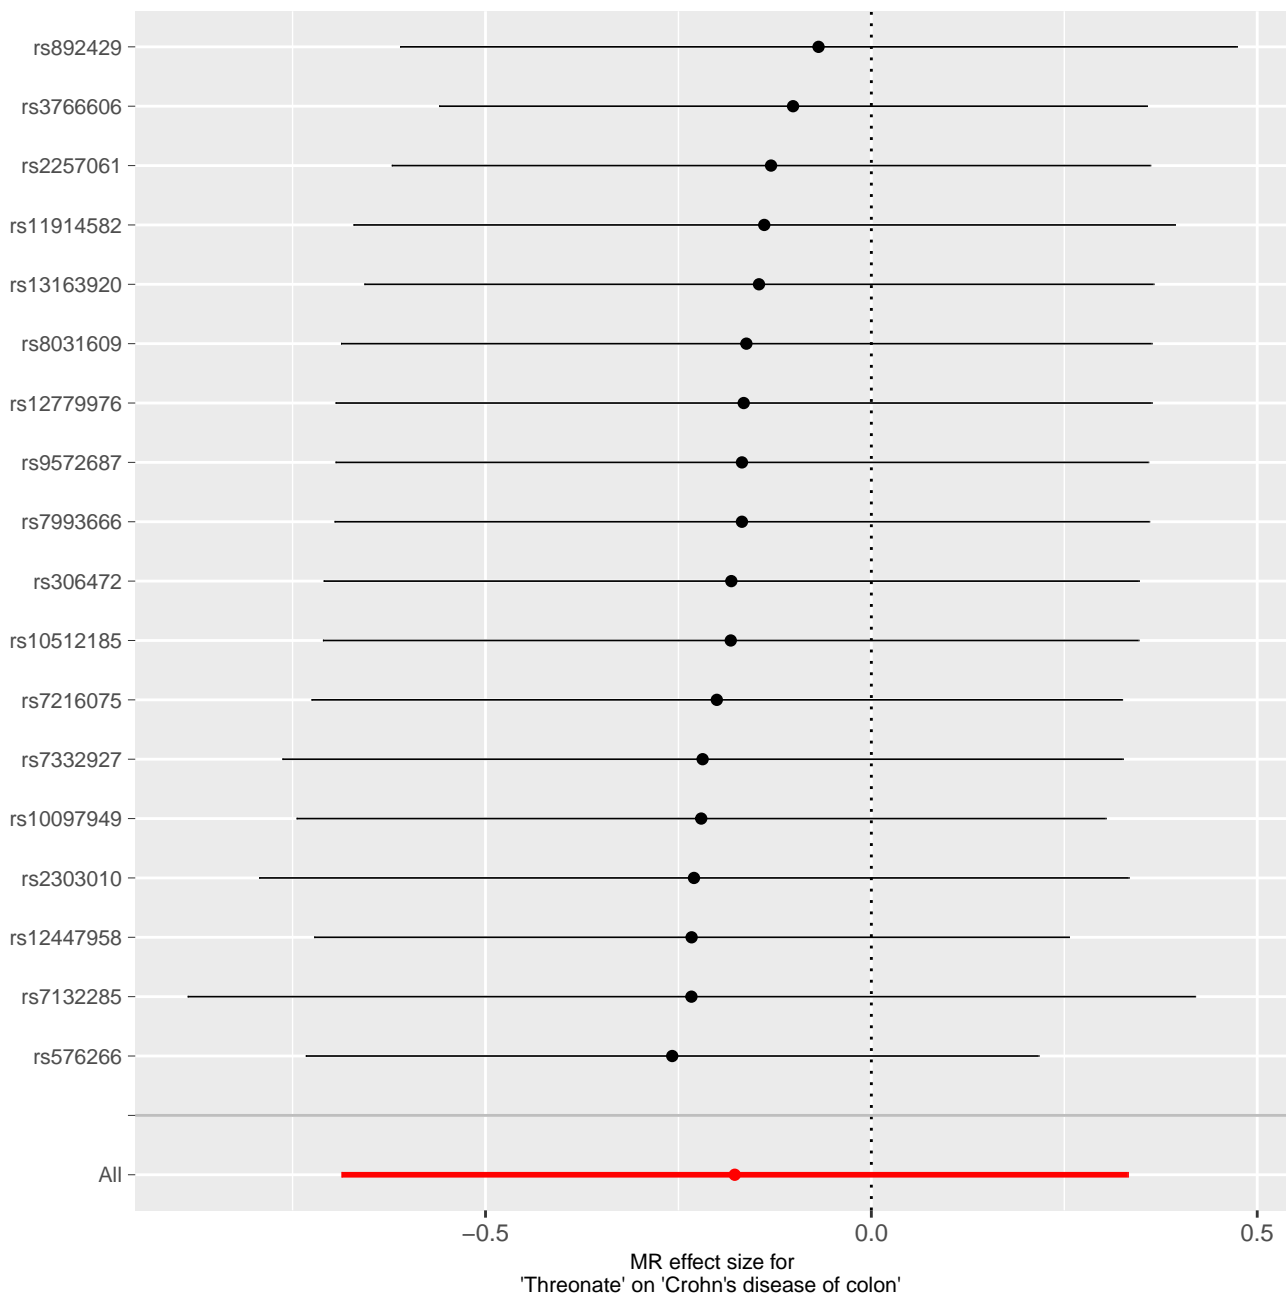

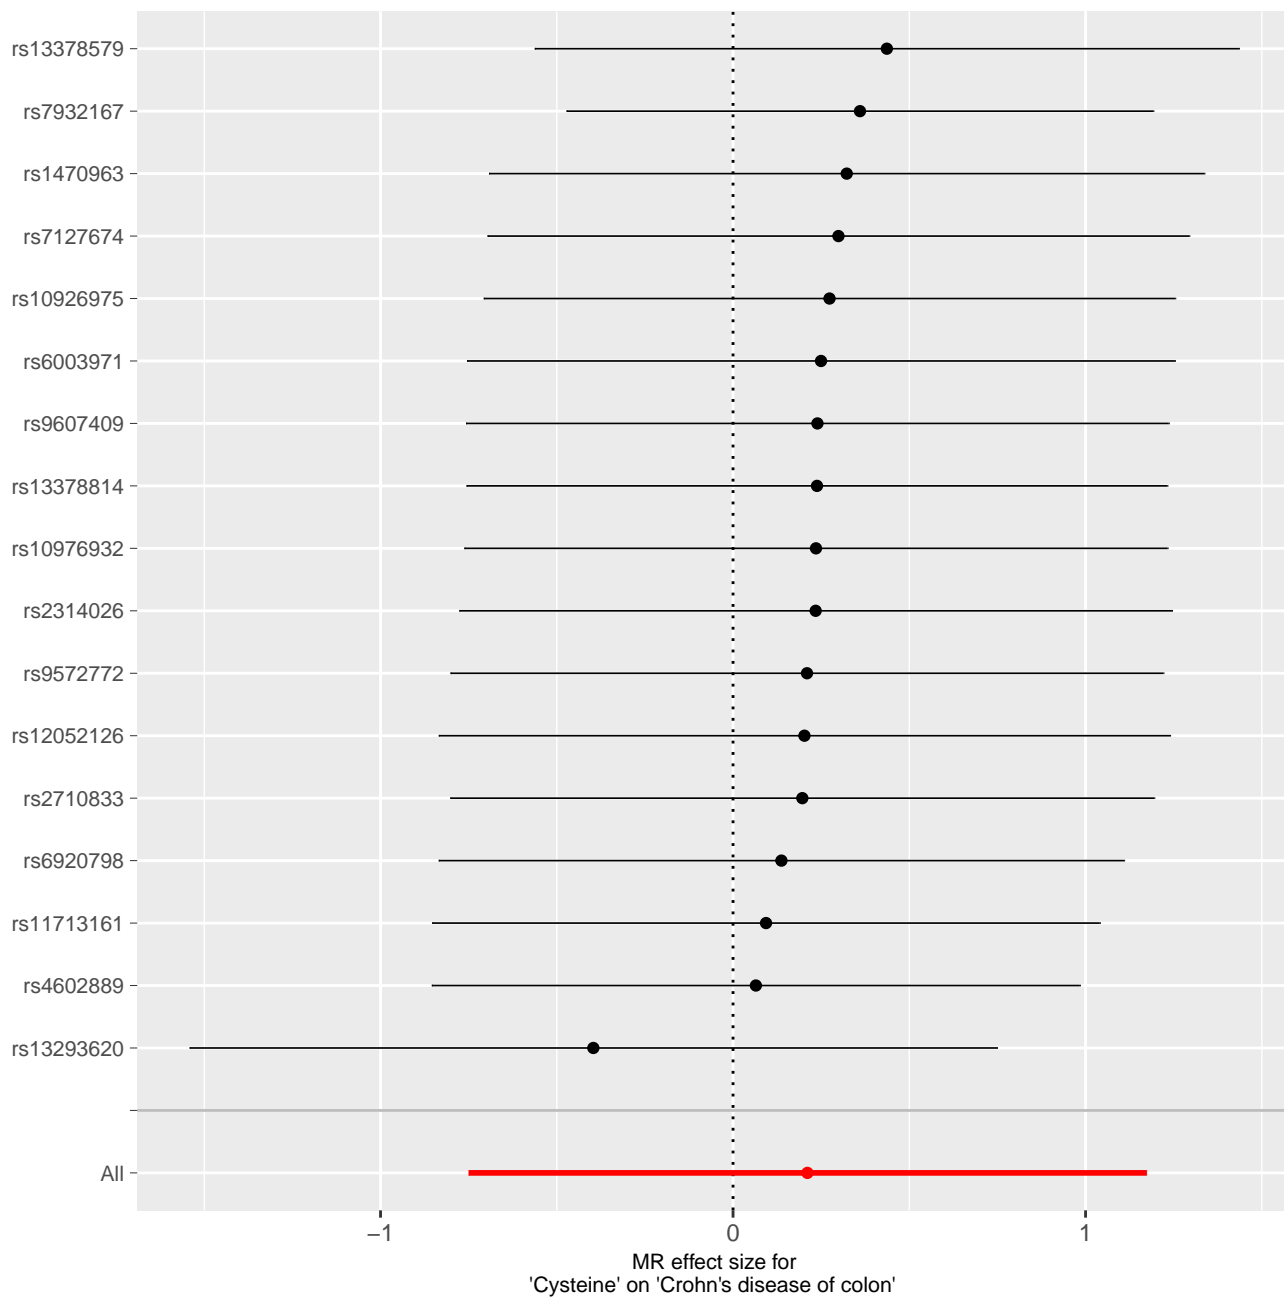

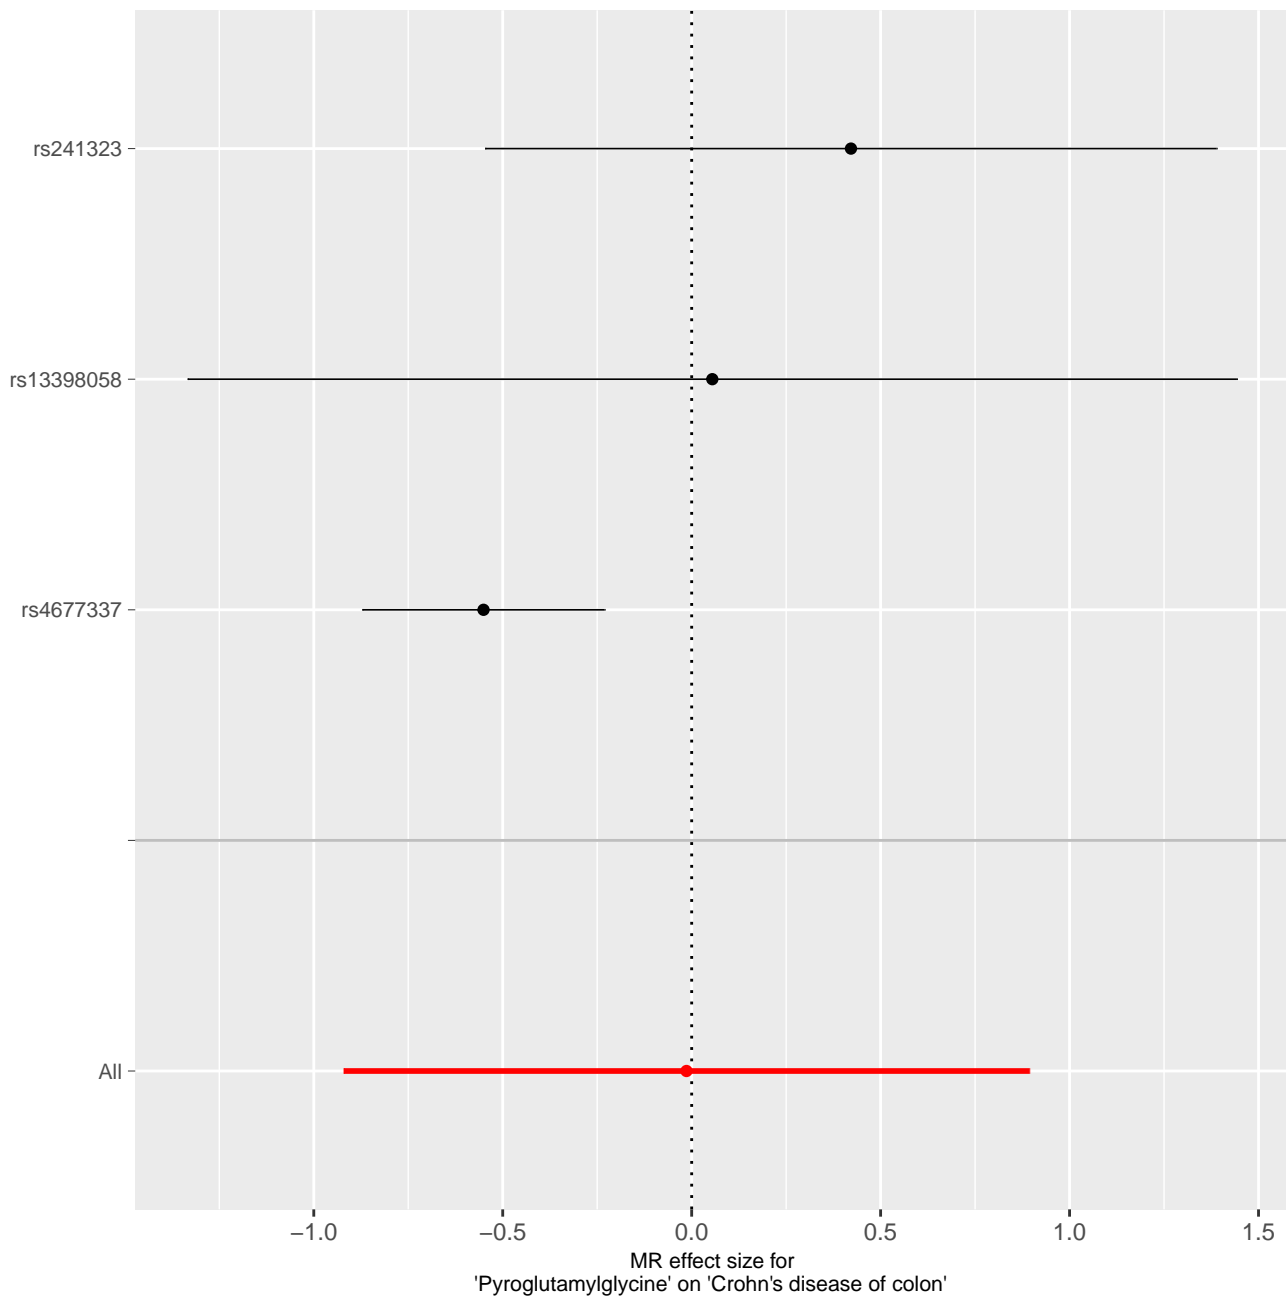

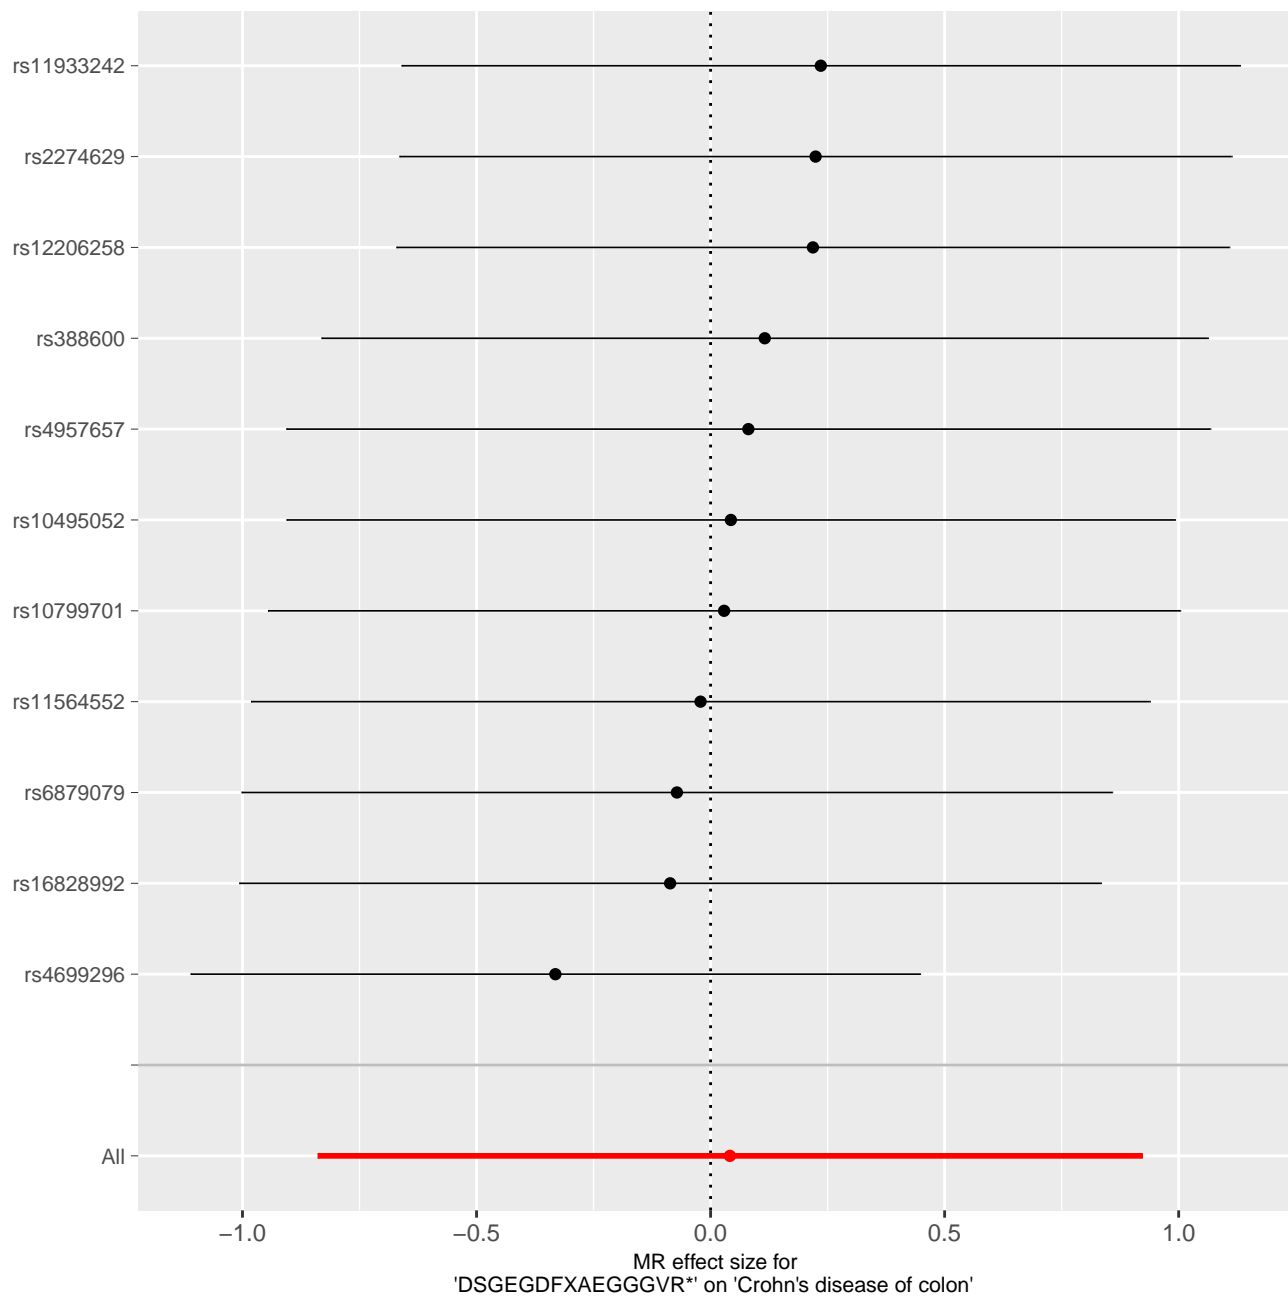

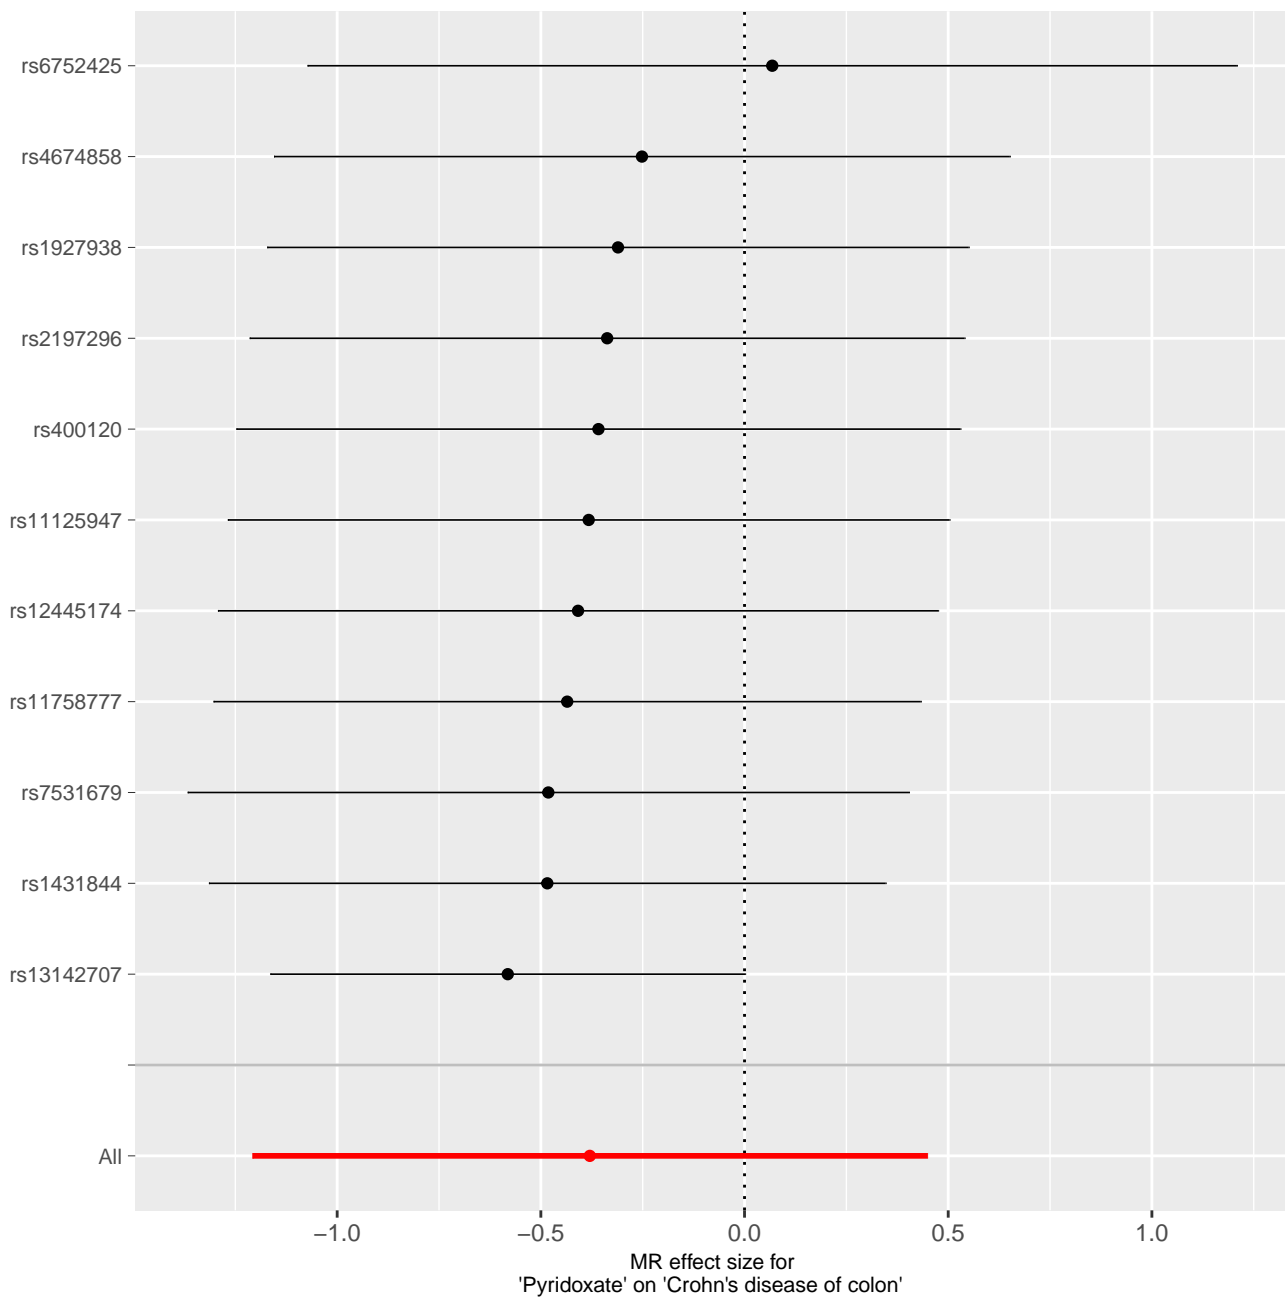

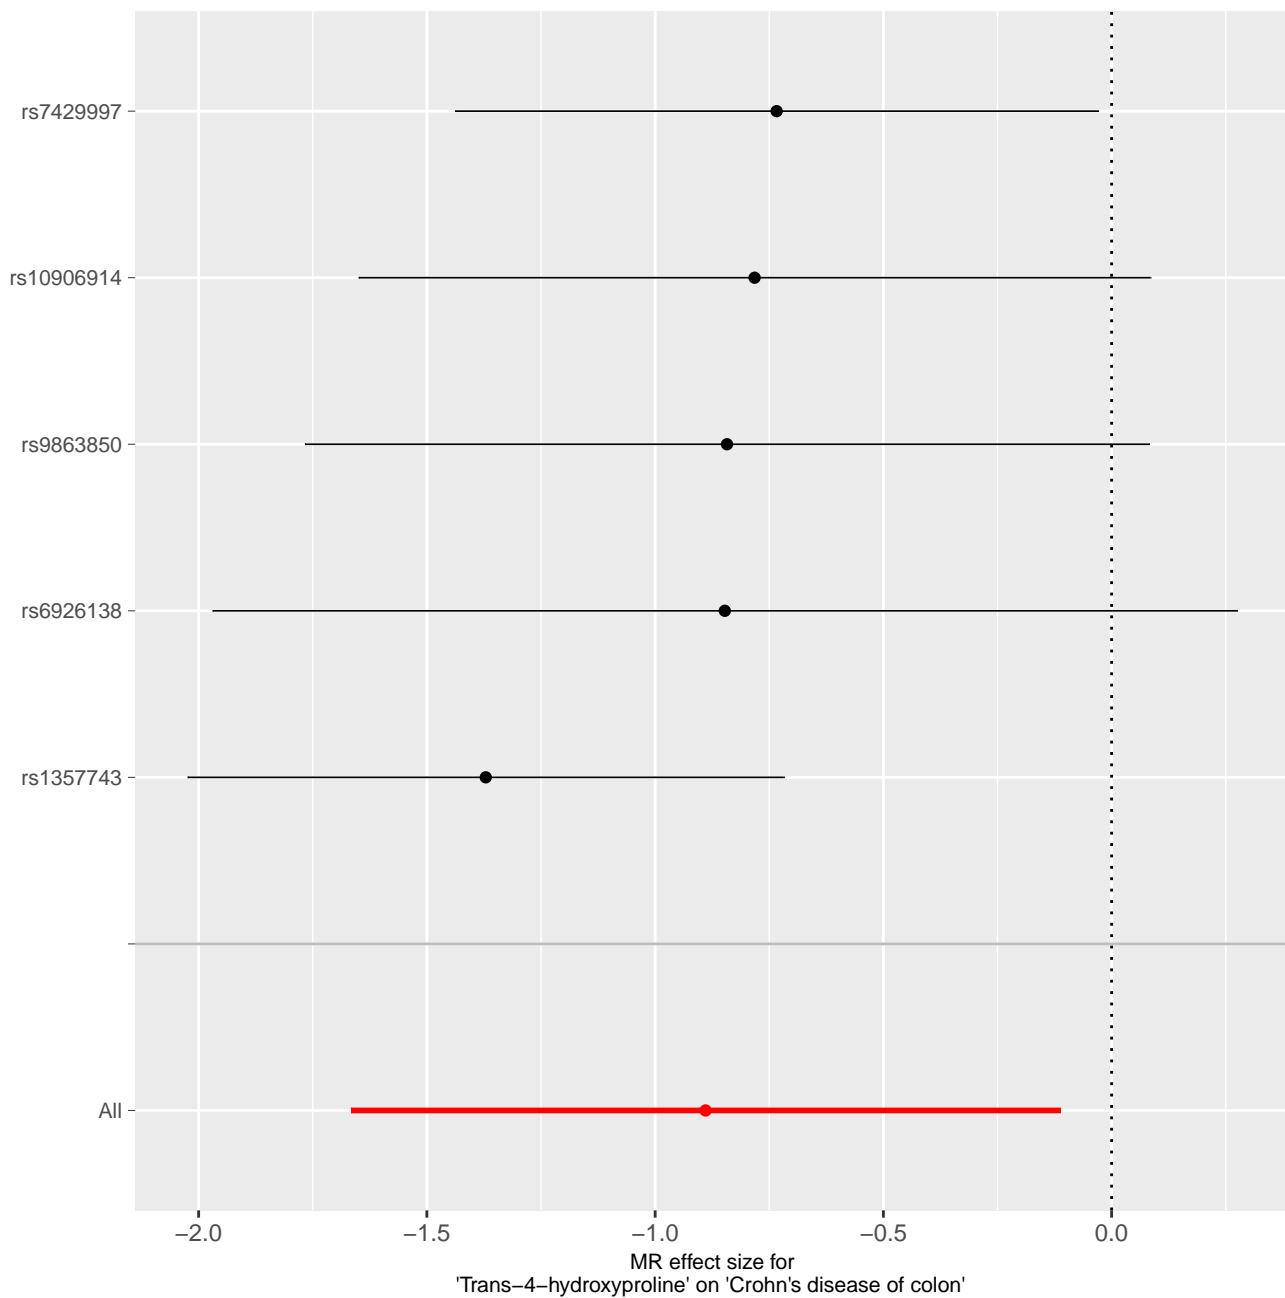



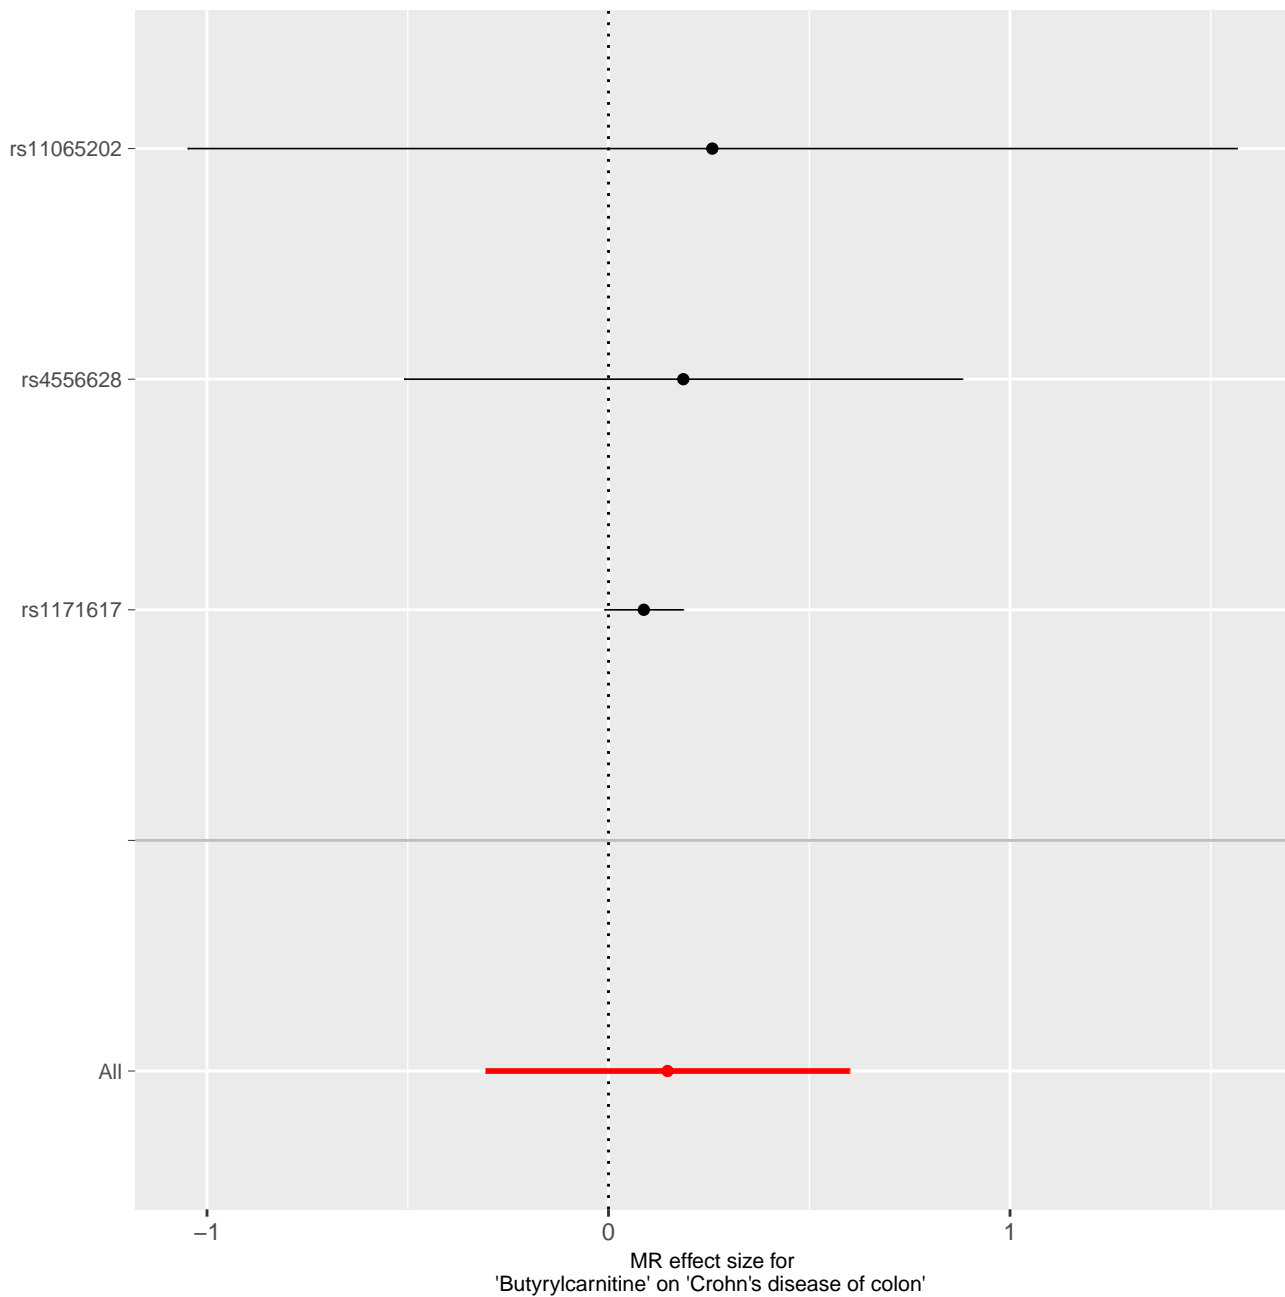

Batch 148 : Caproate (6:0) on Crohn's disease of colon

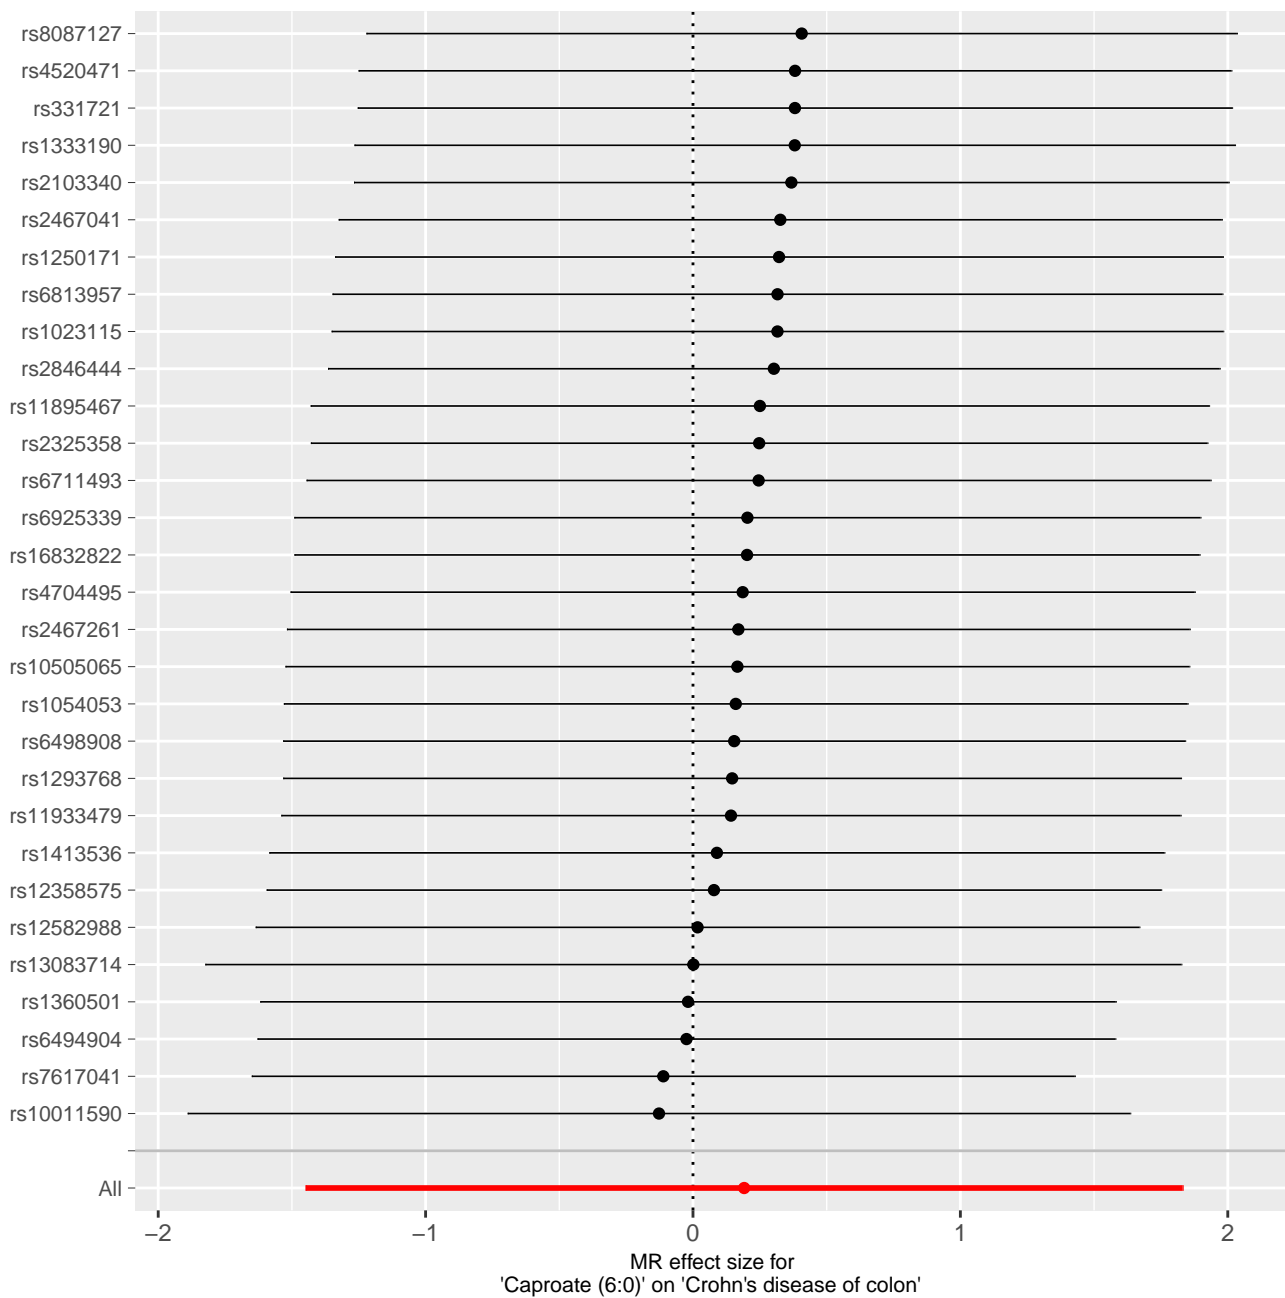

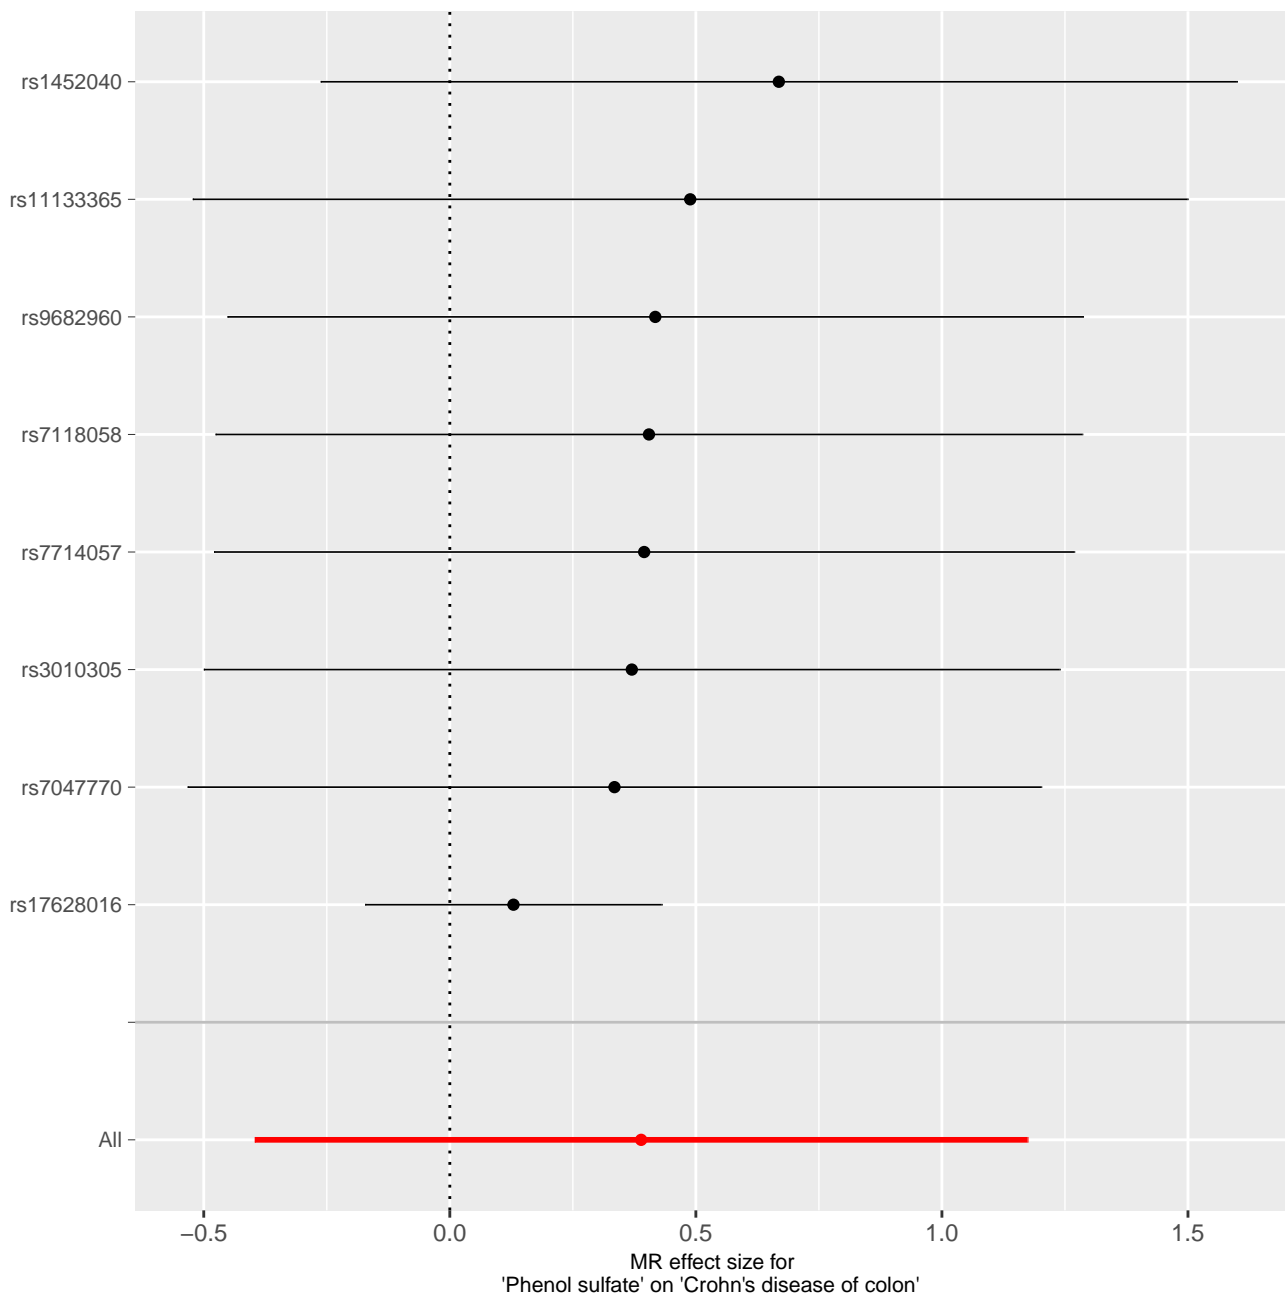

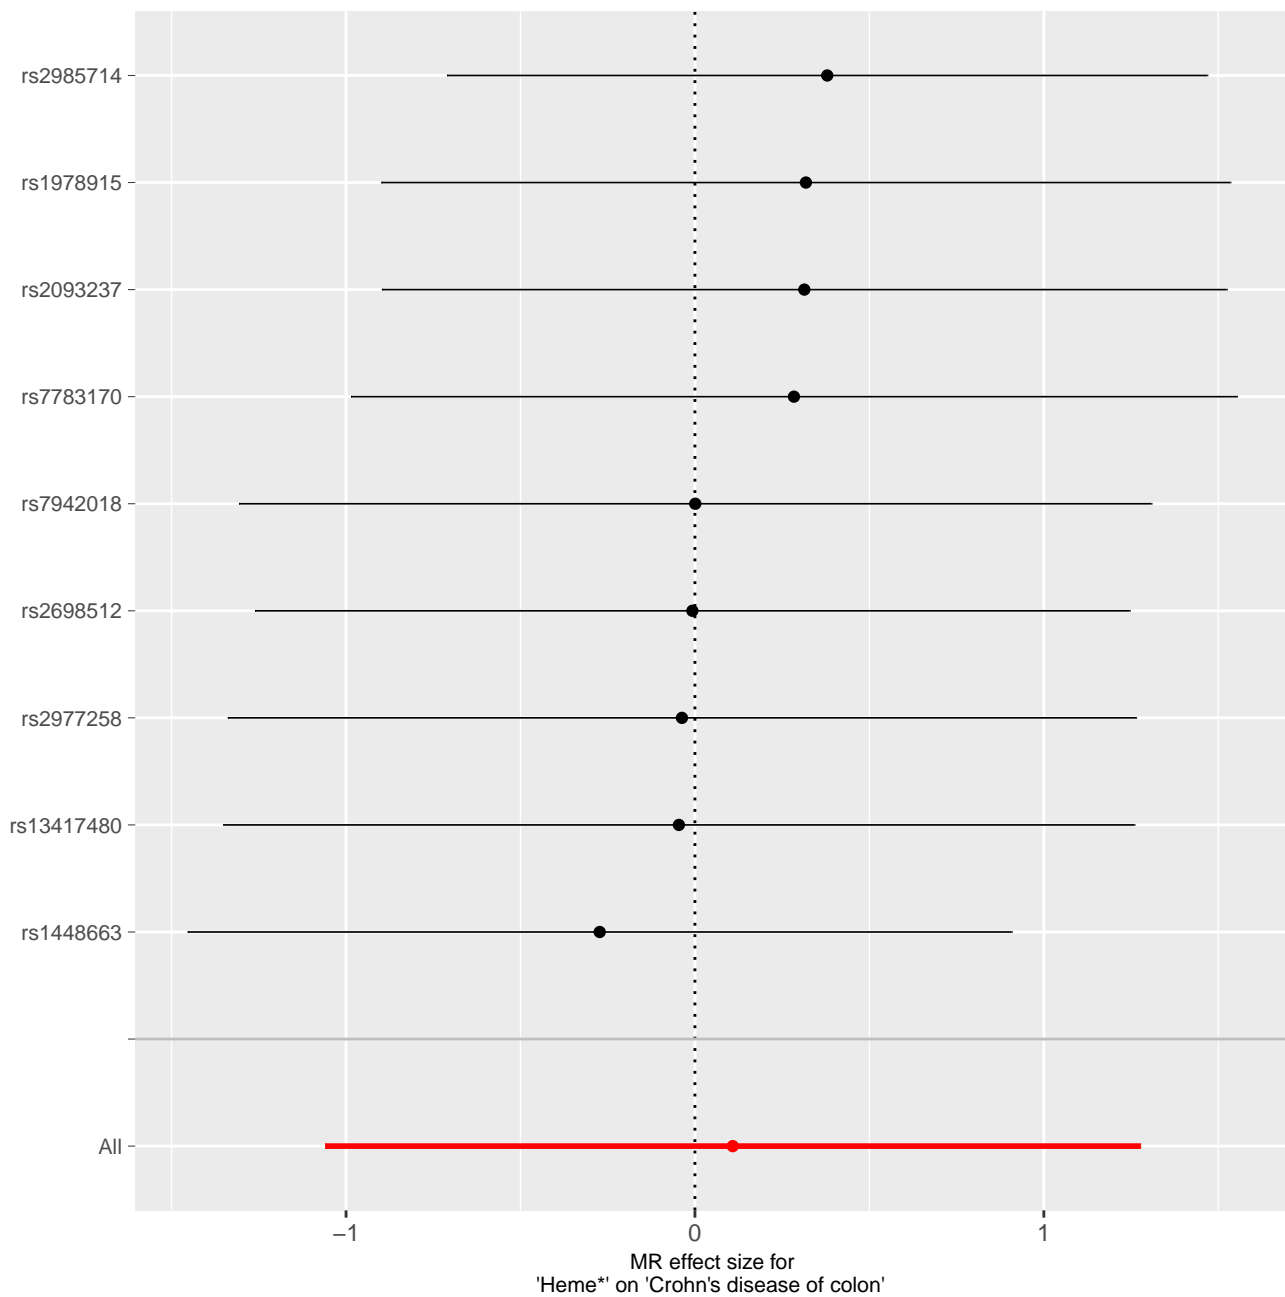

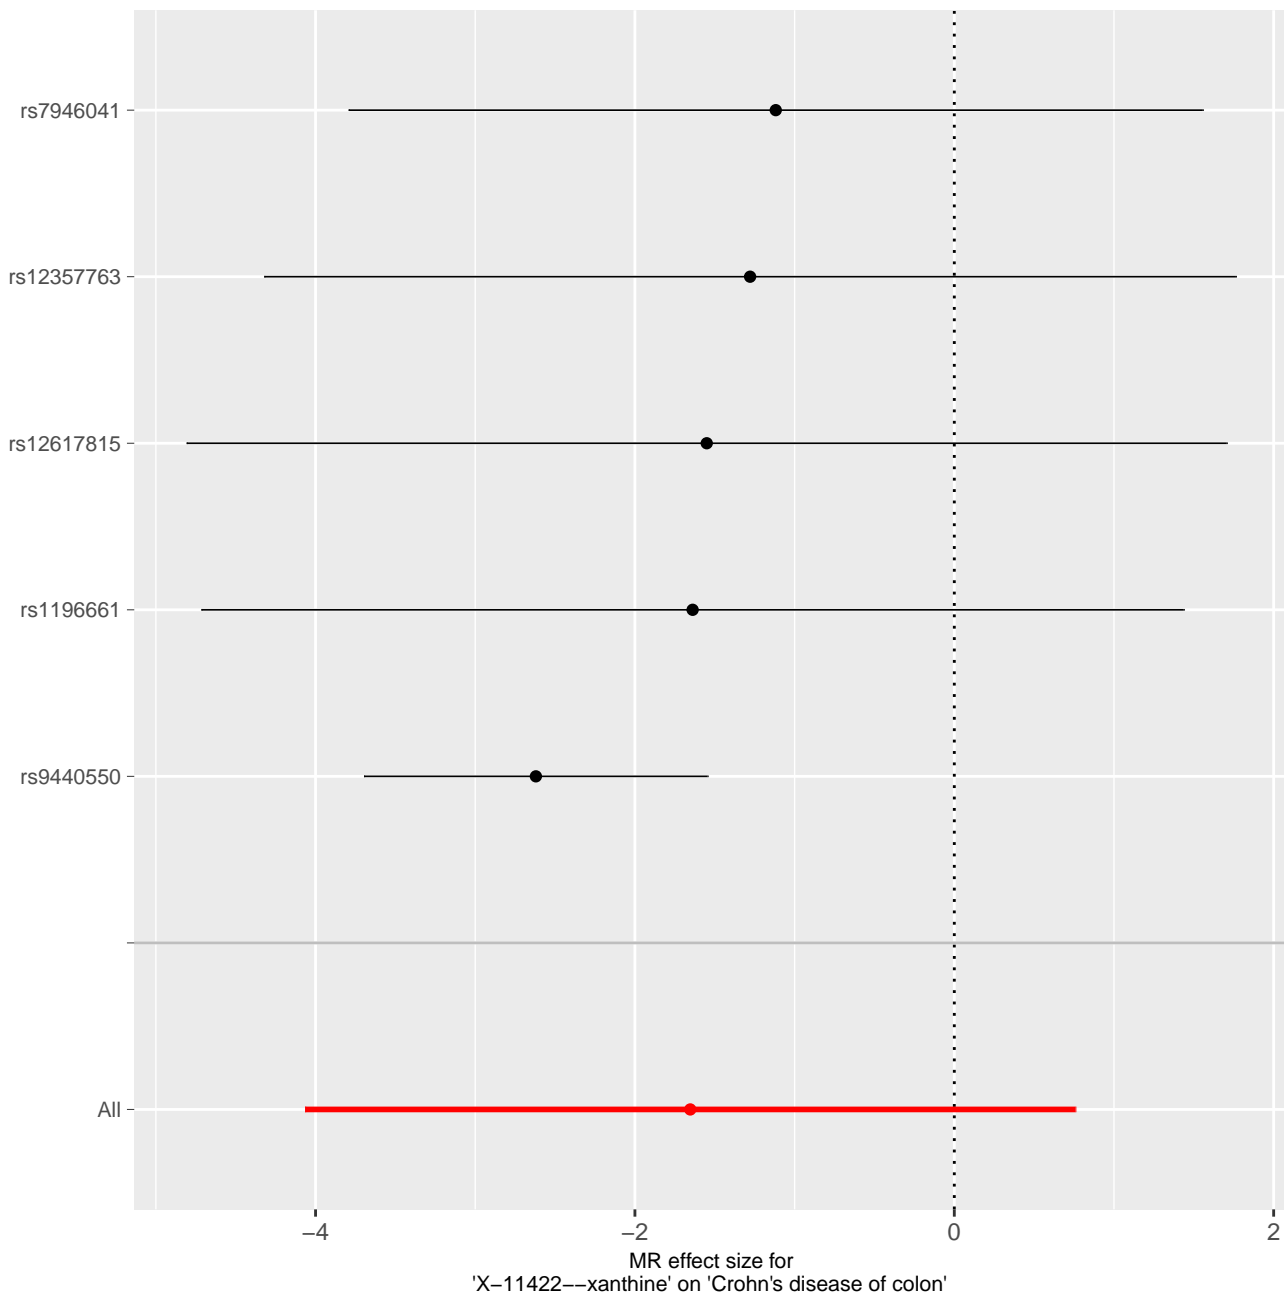

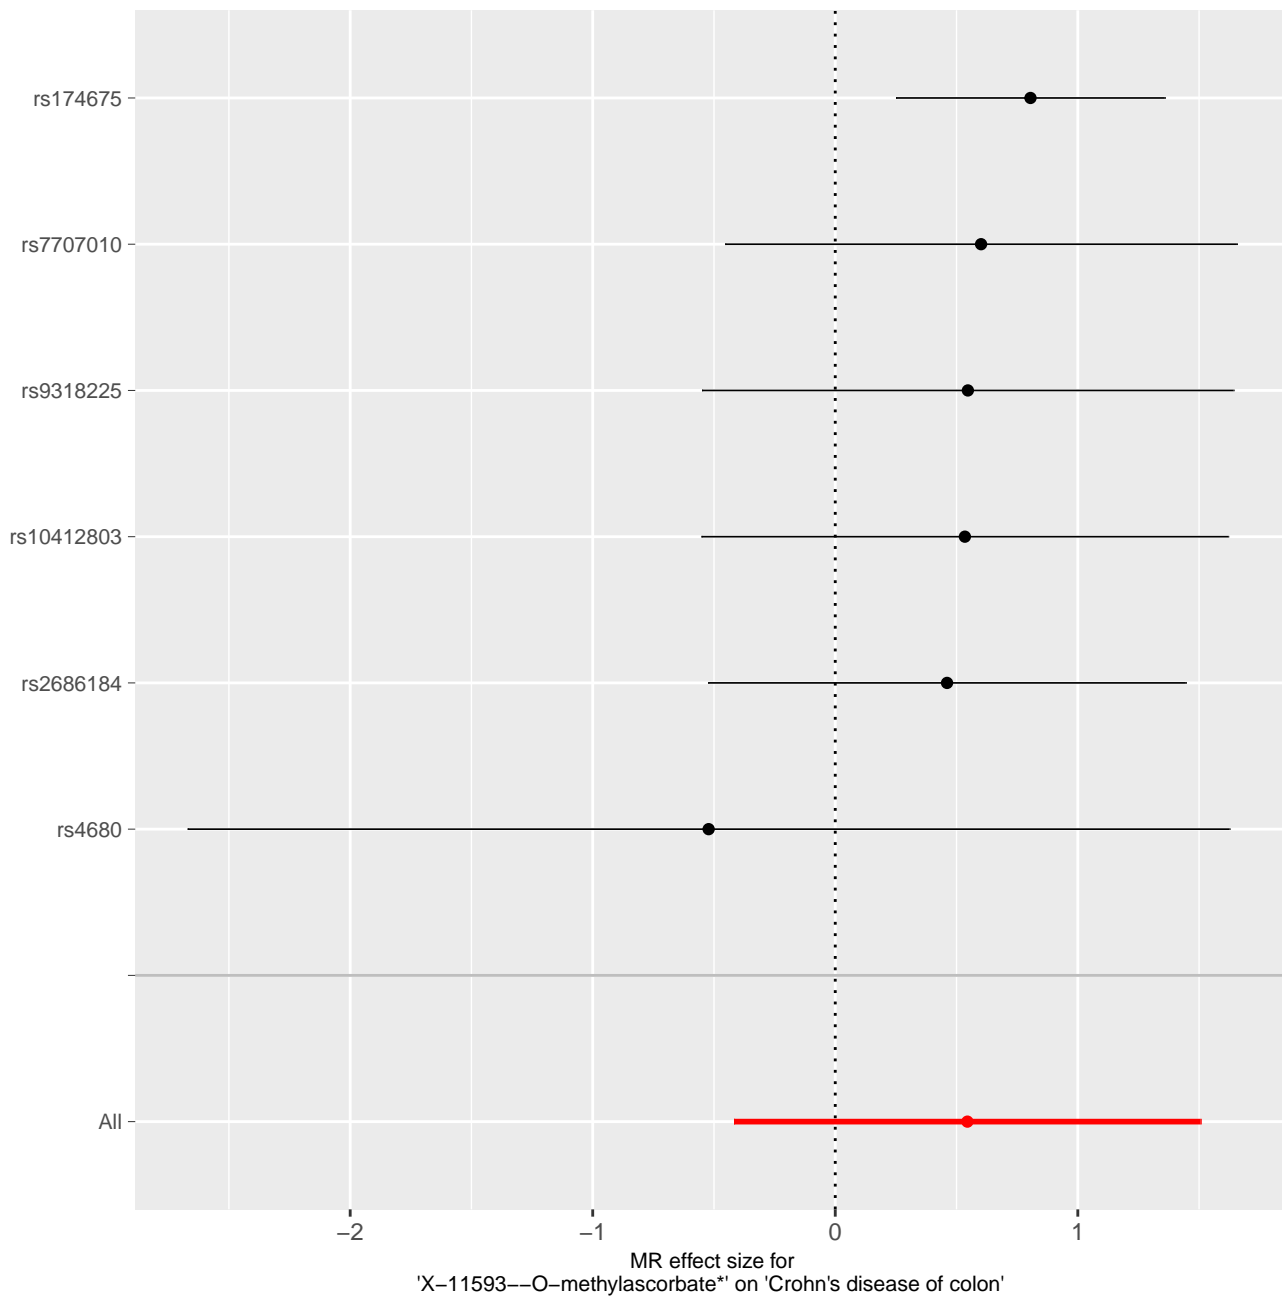

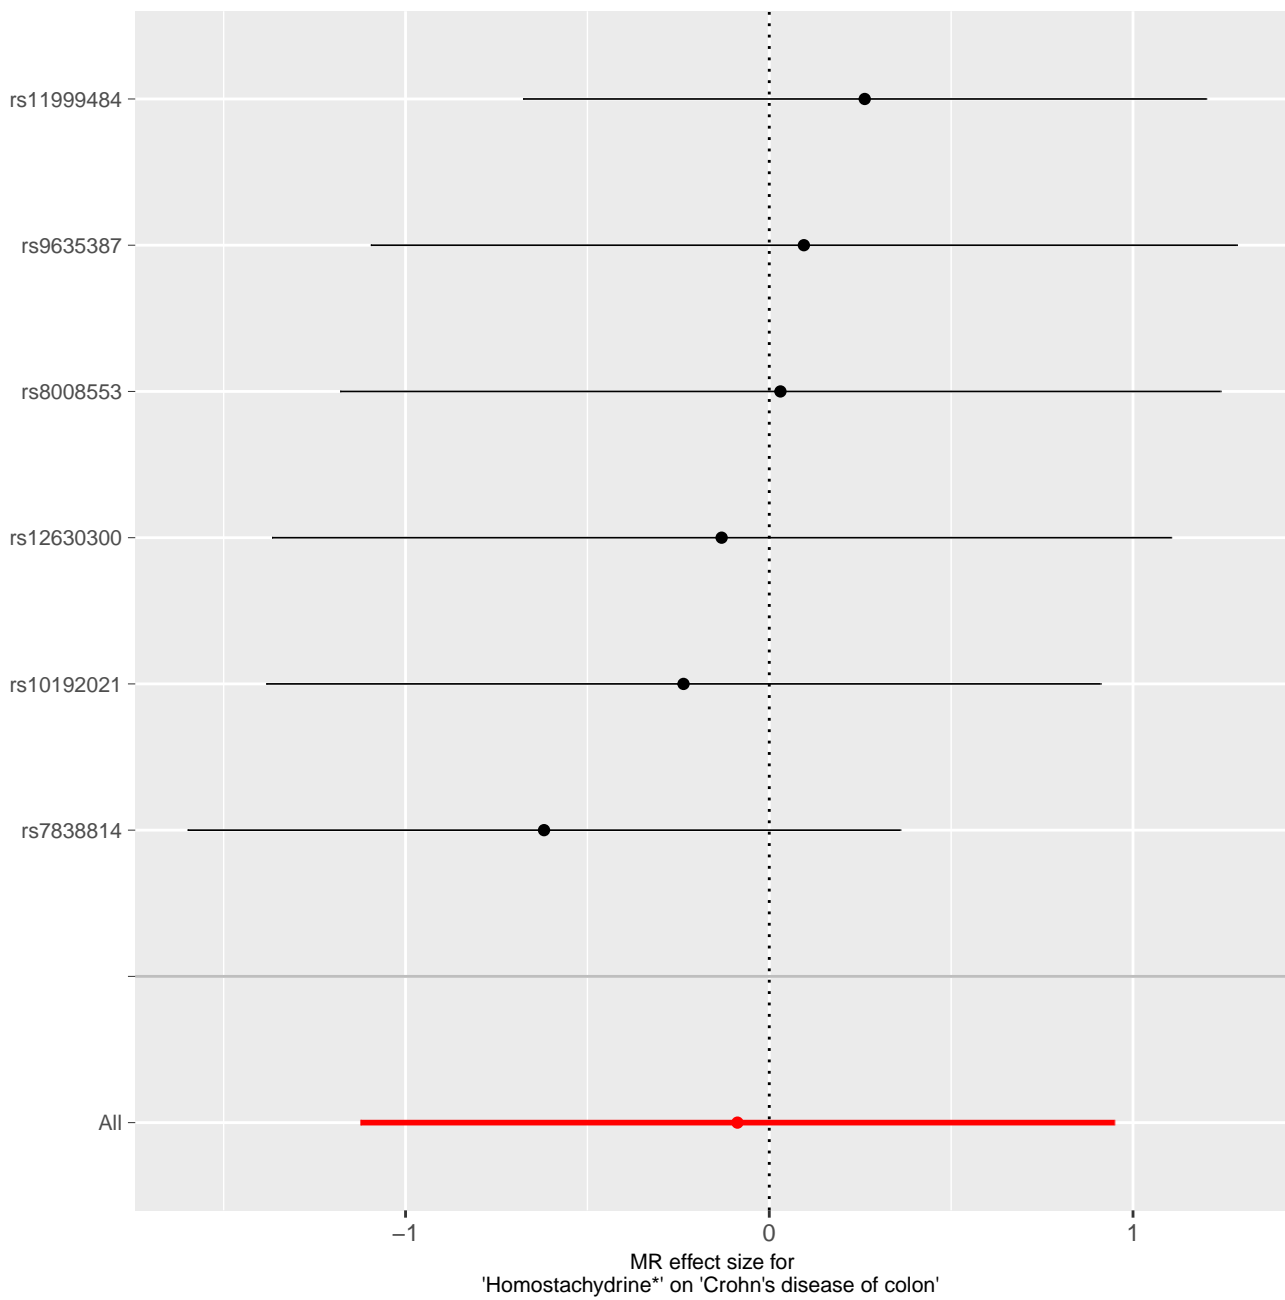

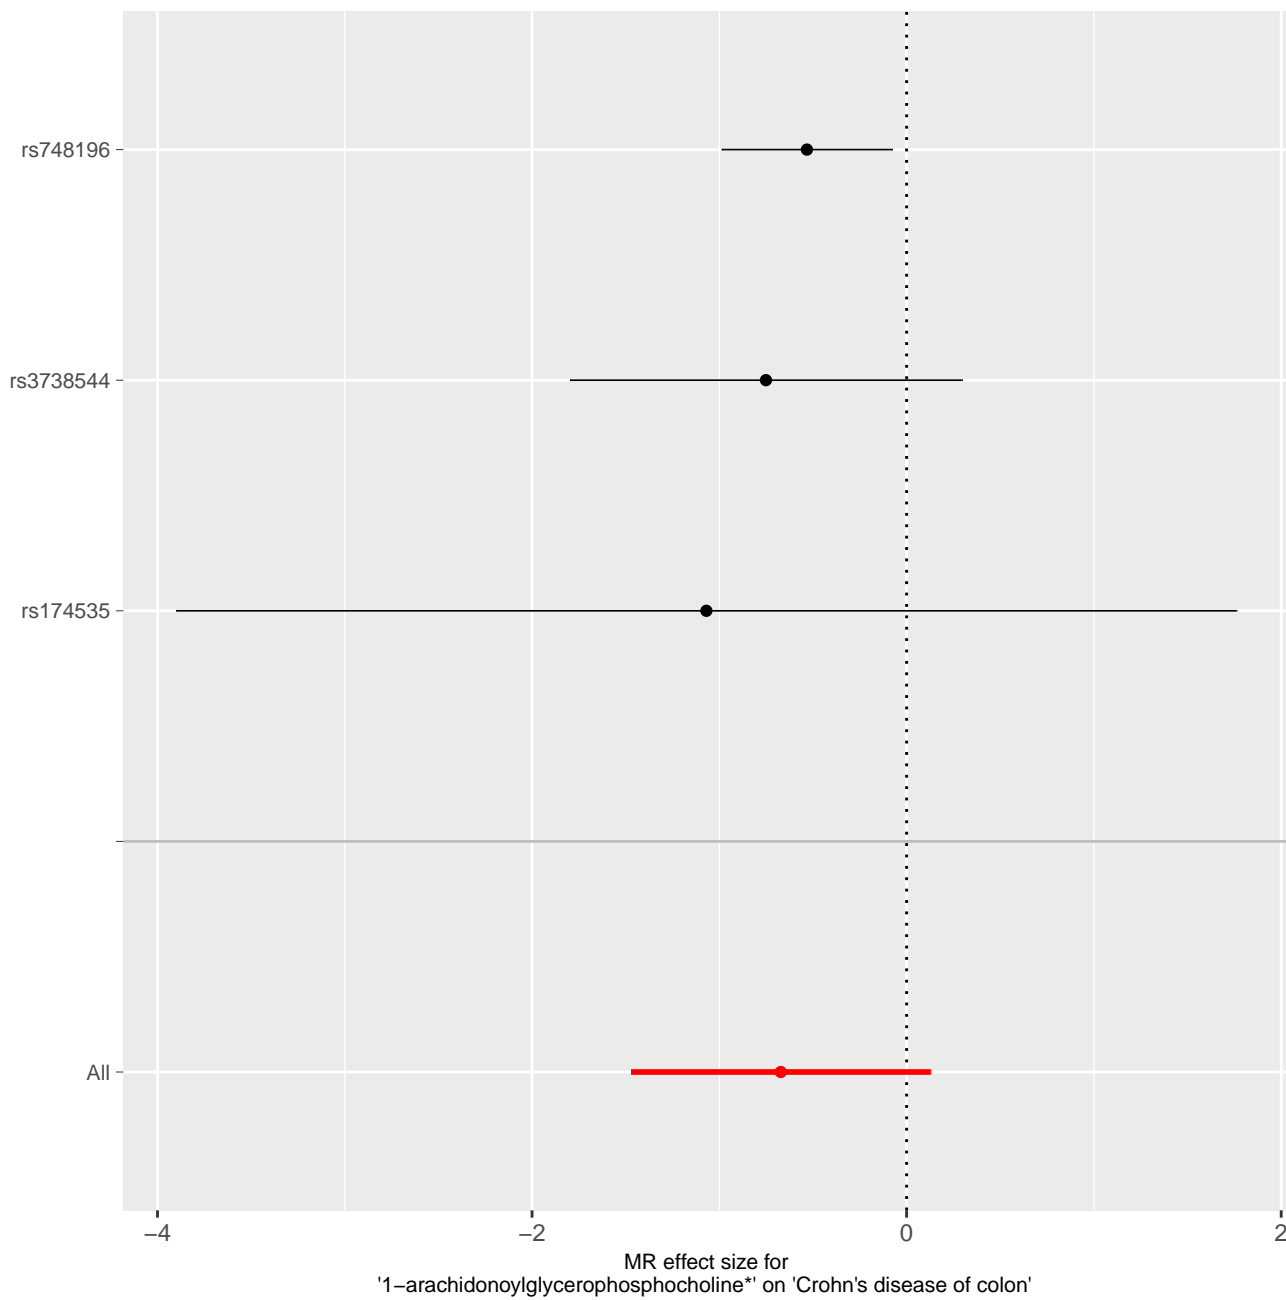



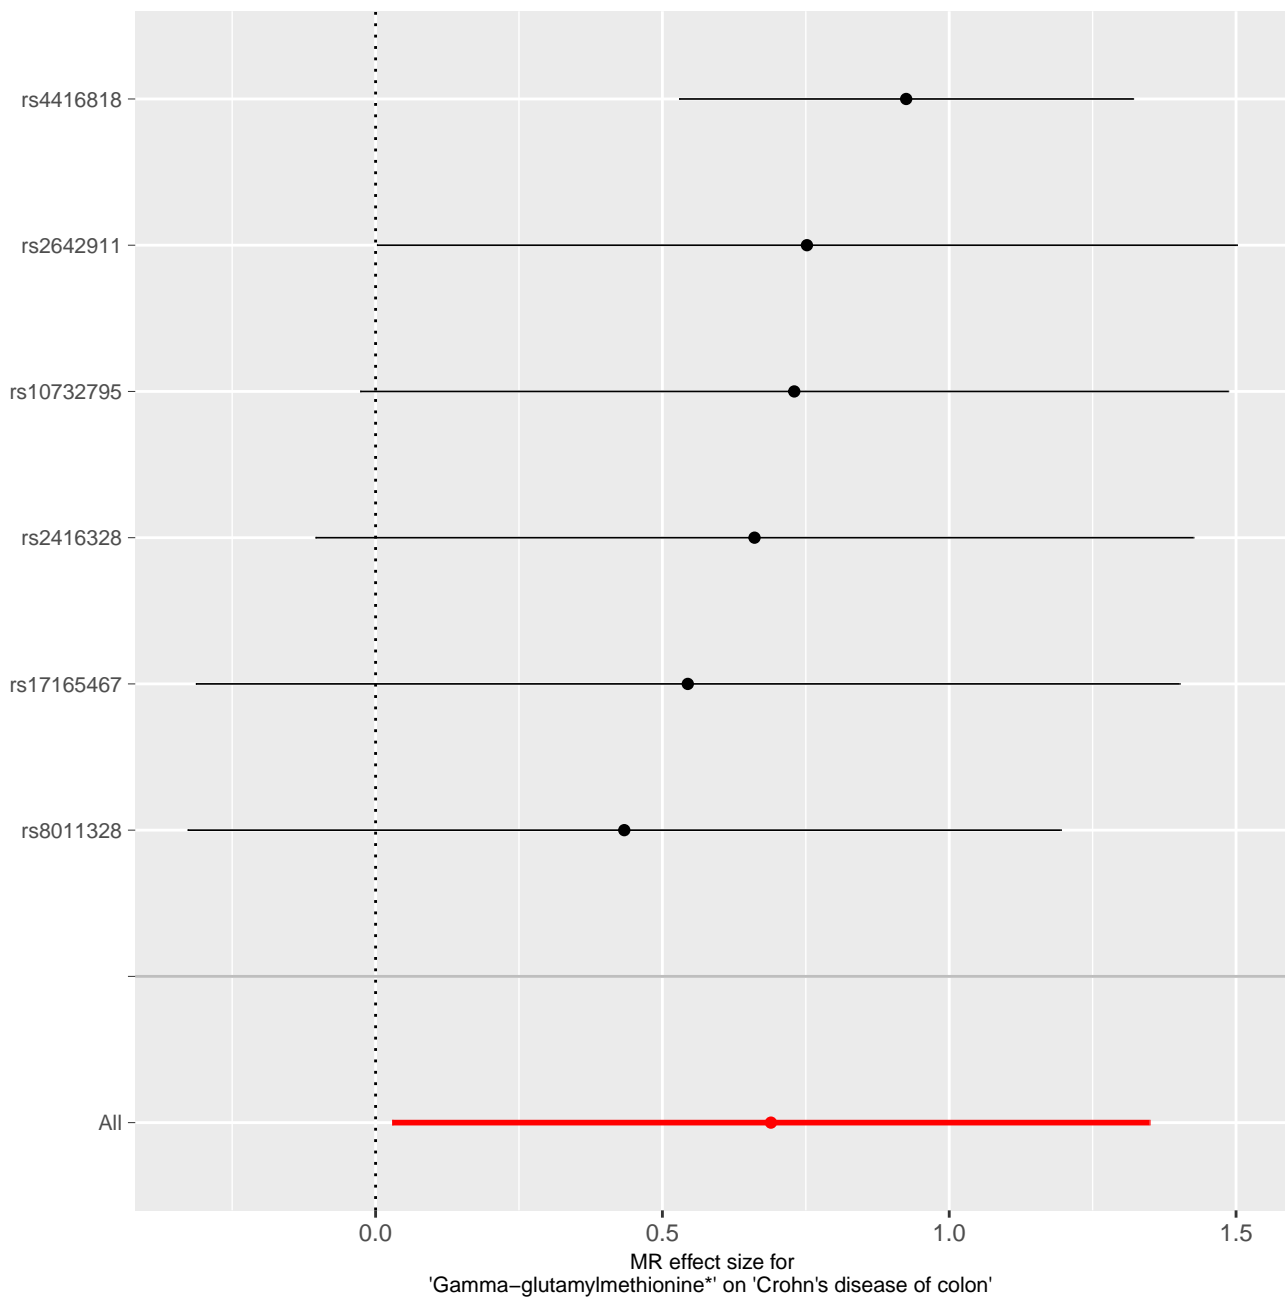

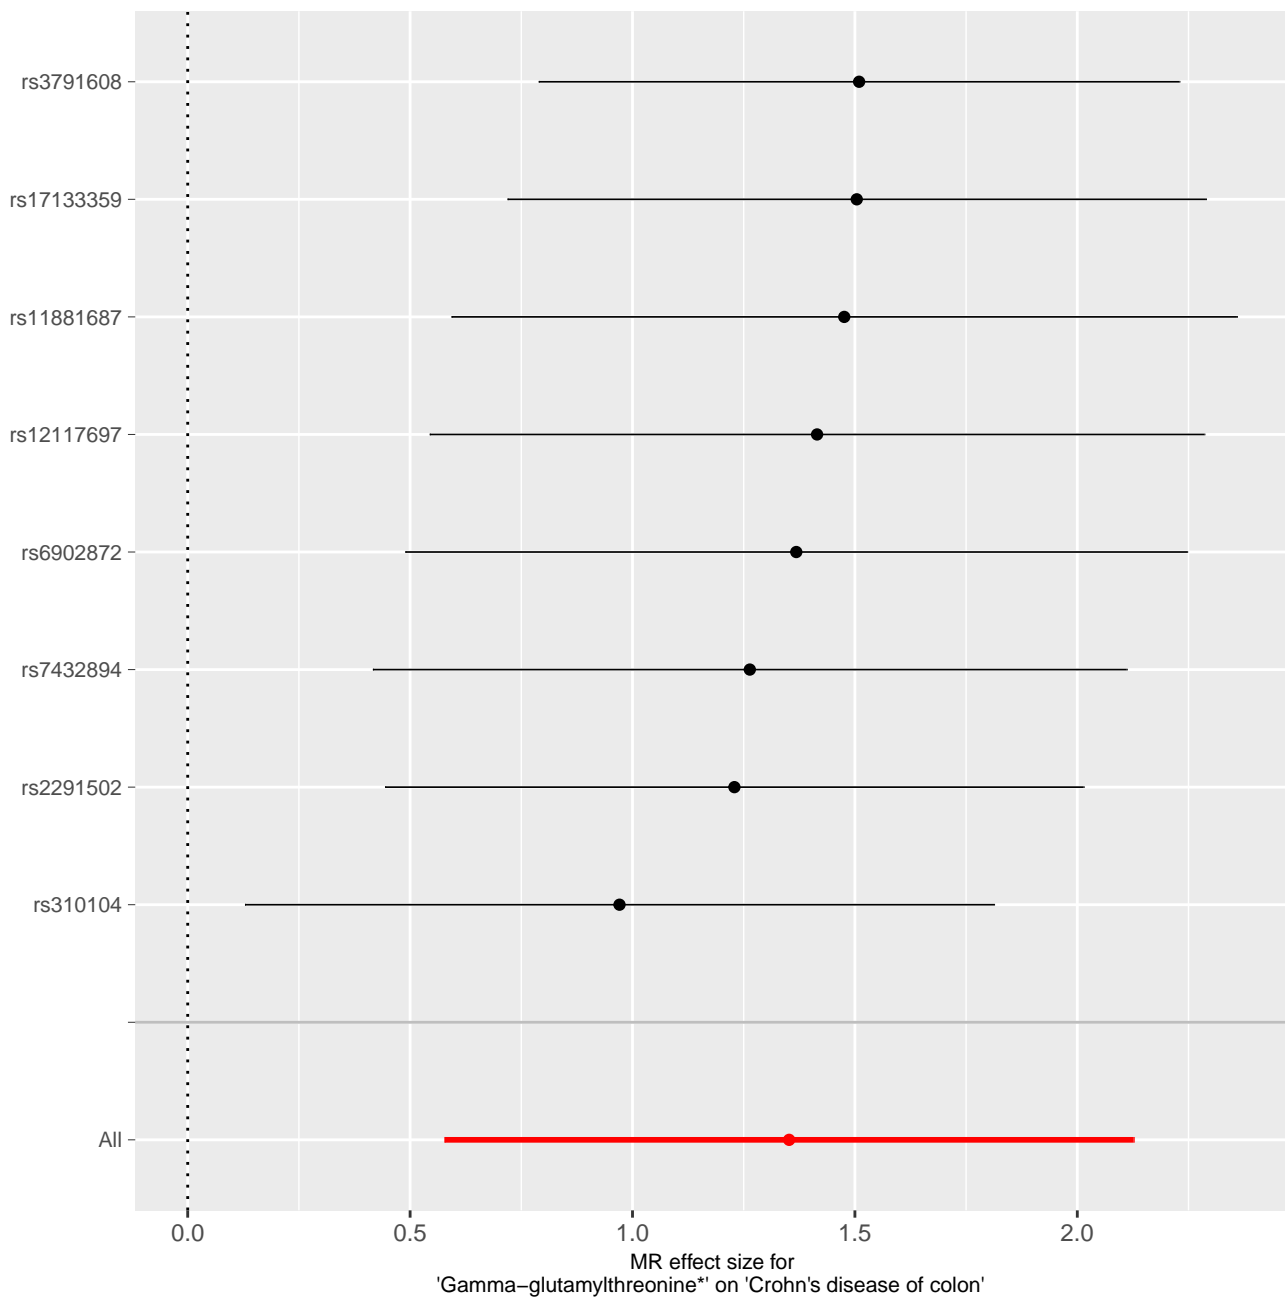

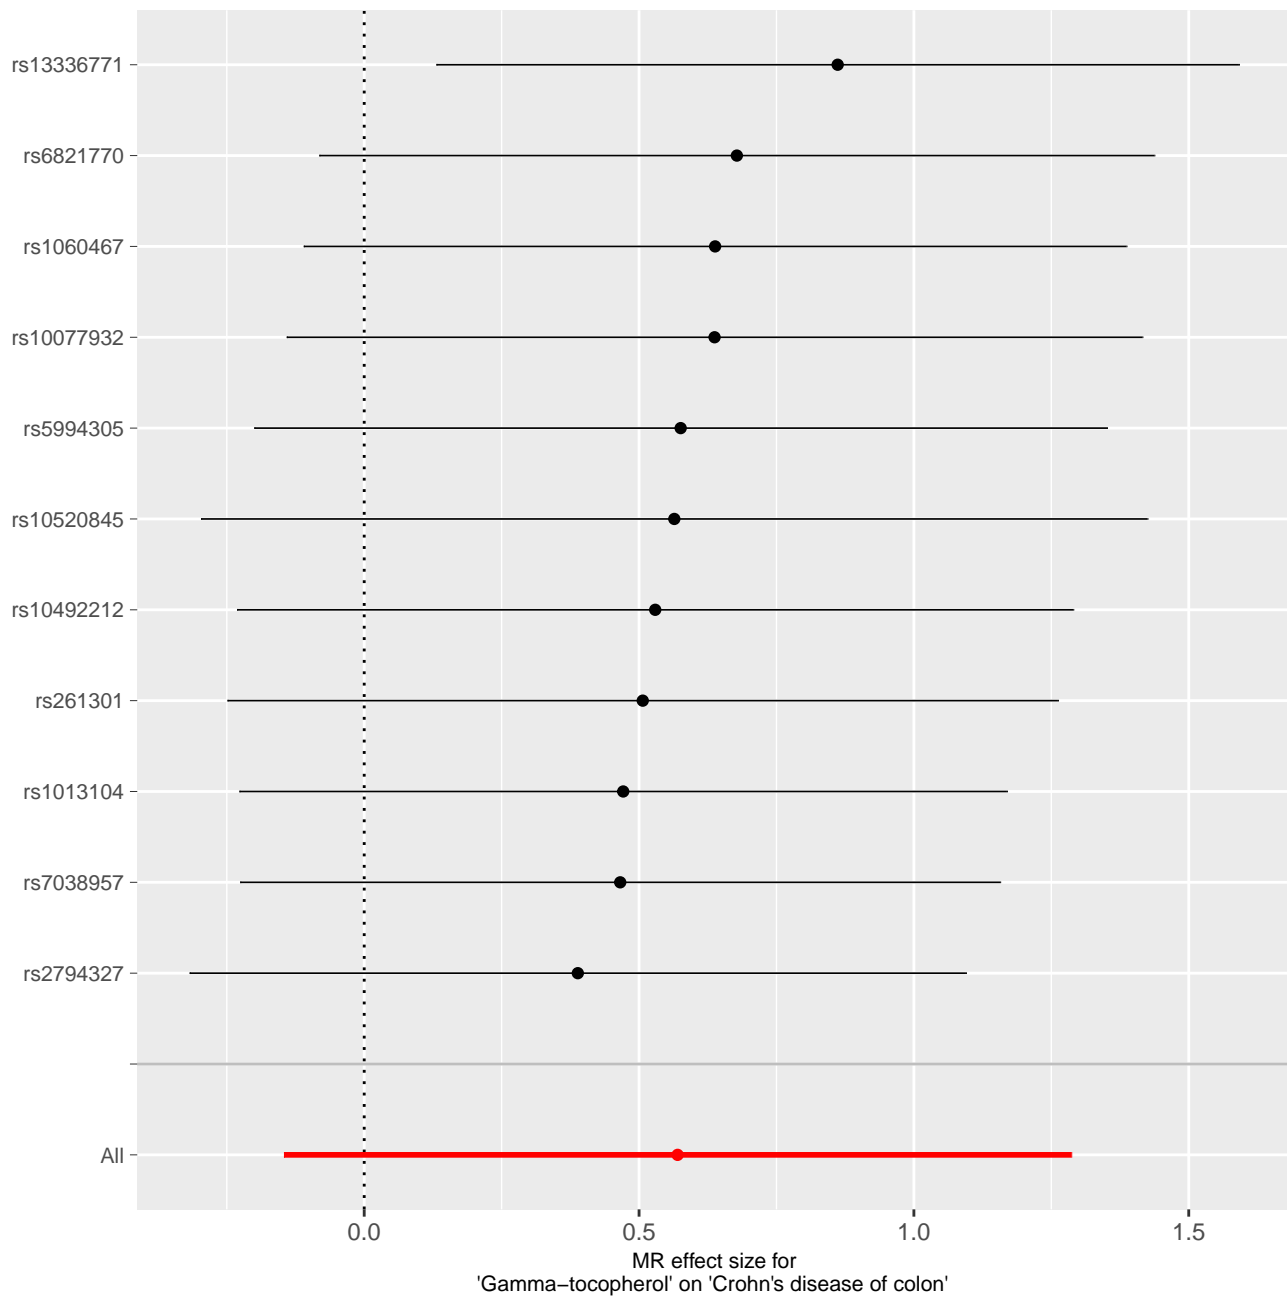

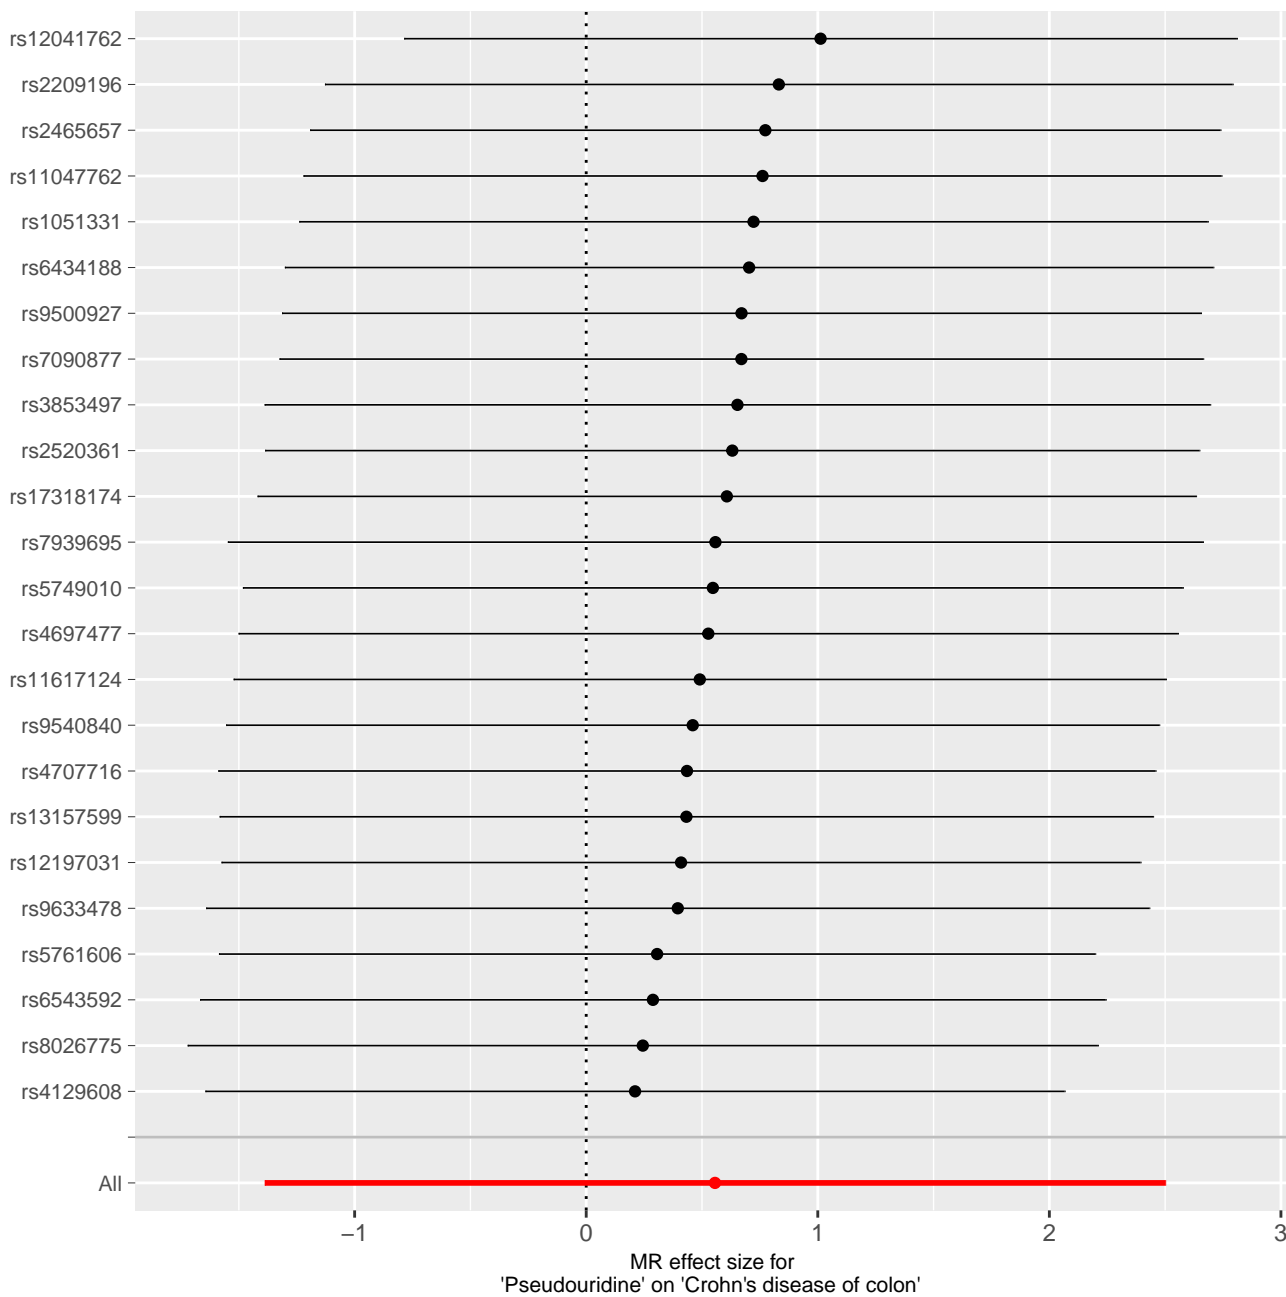

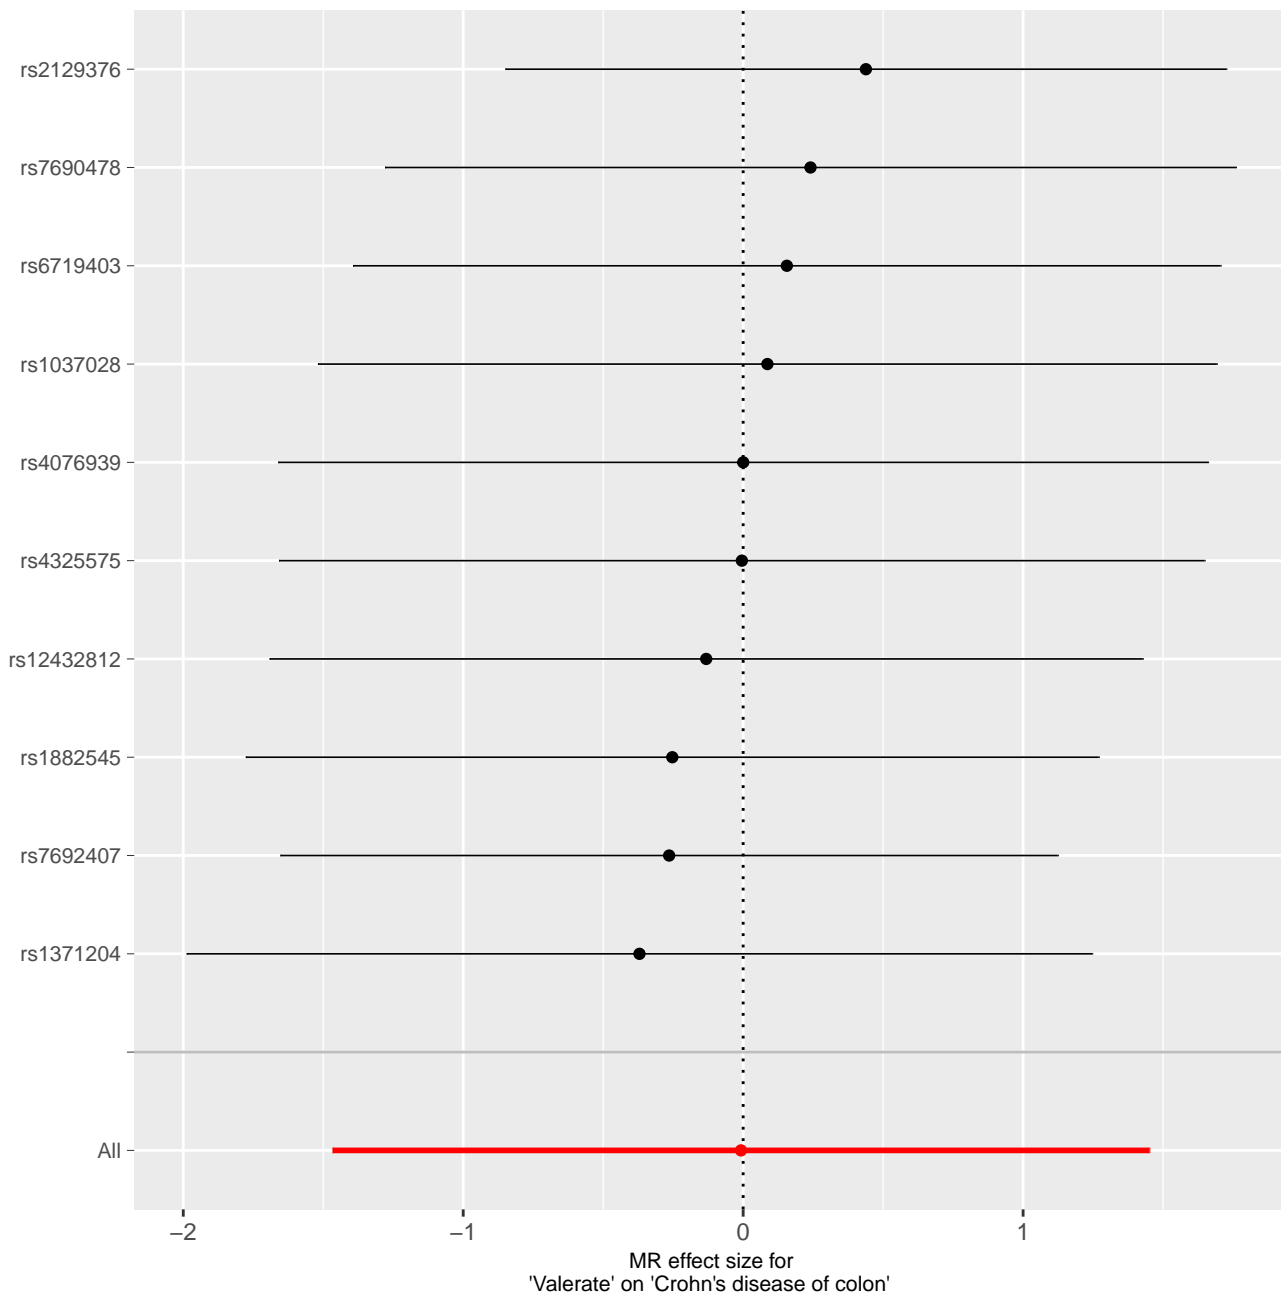

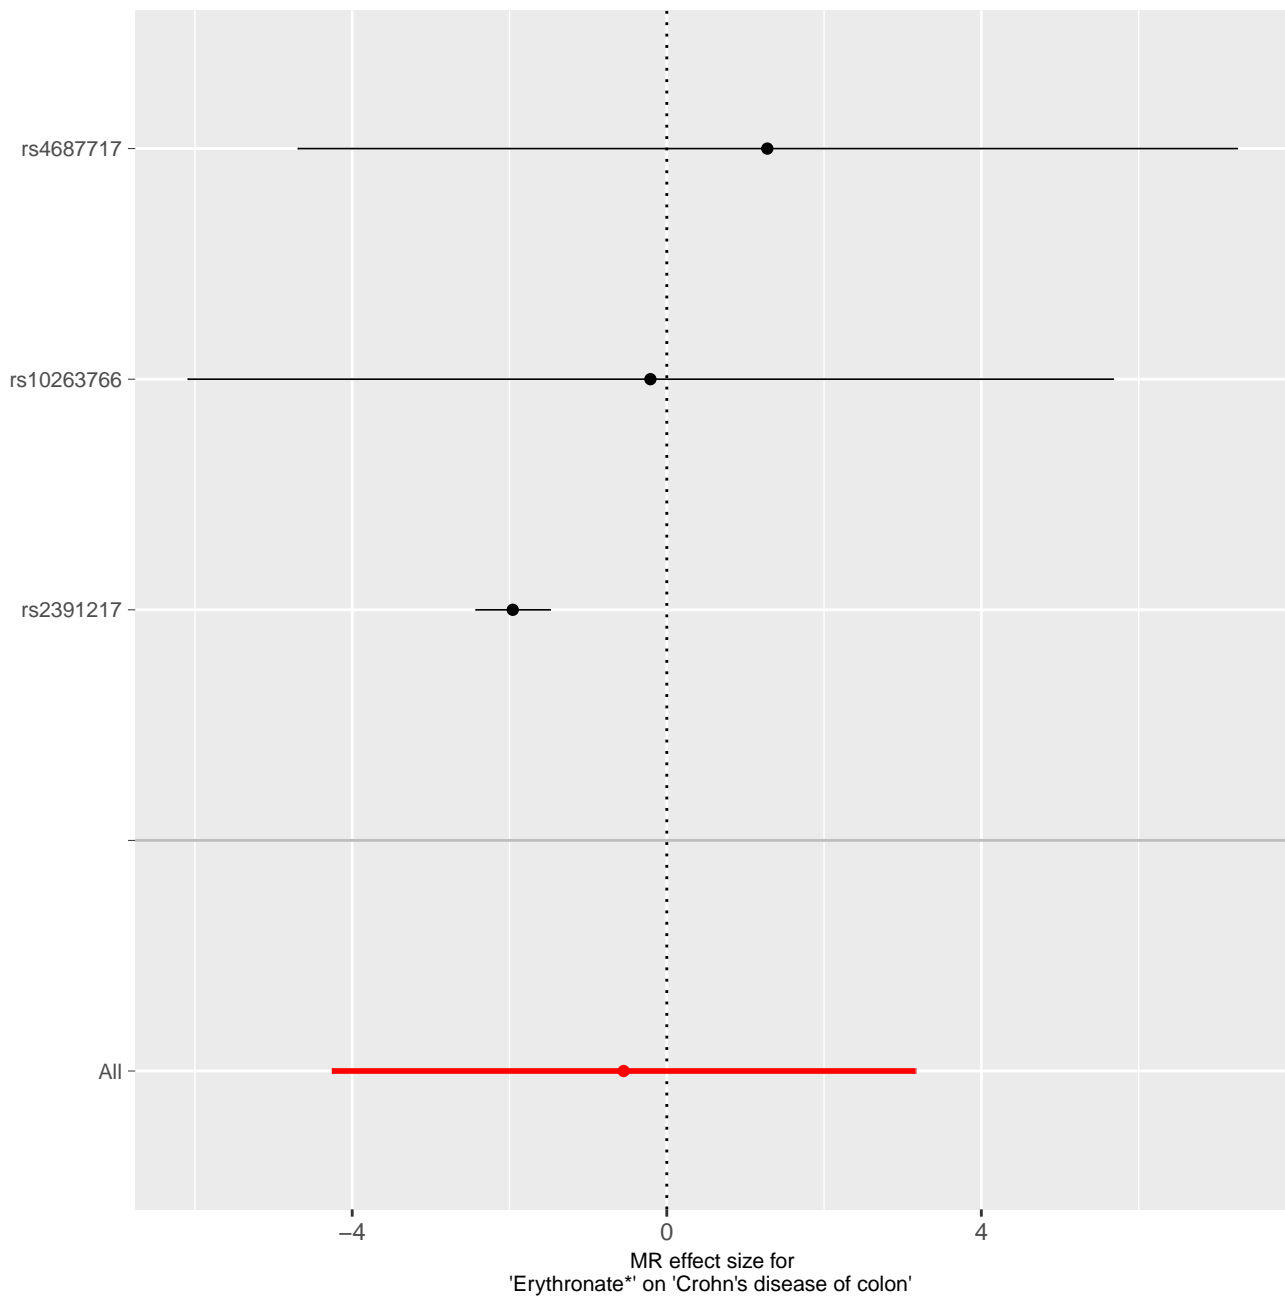

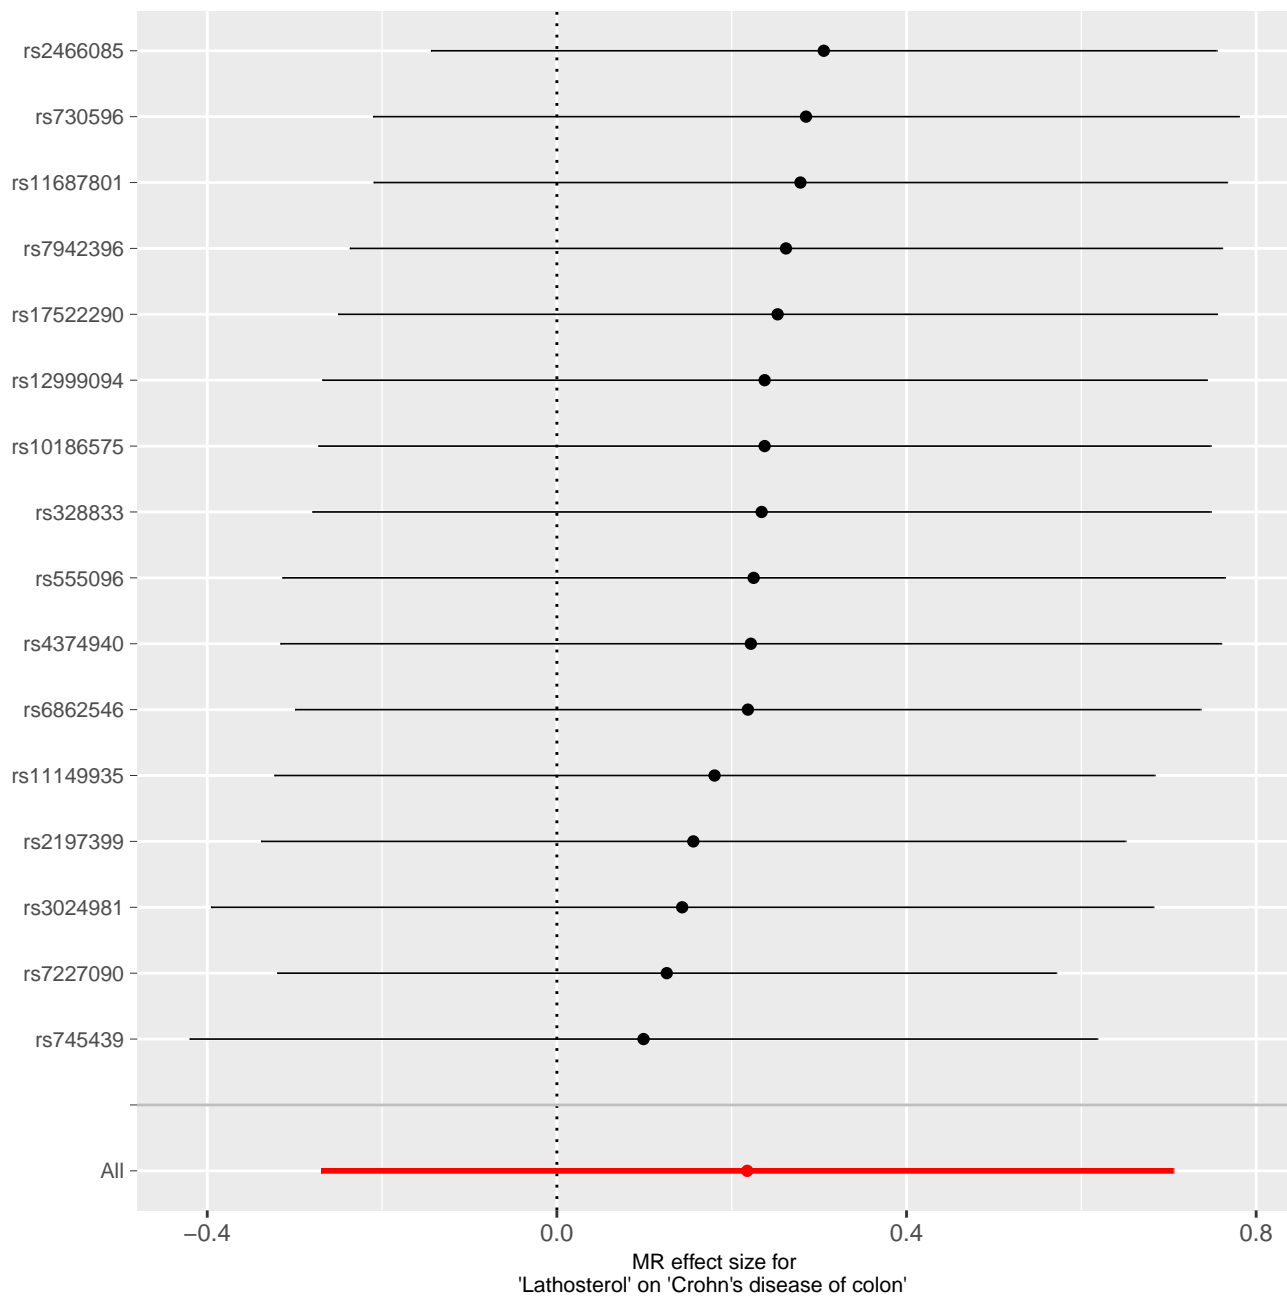

Batch 185 : Eicosenoate (20:1n9 or 11) on Crohn's disease of colon

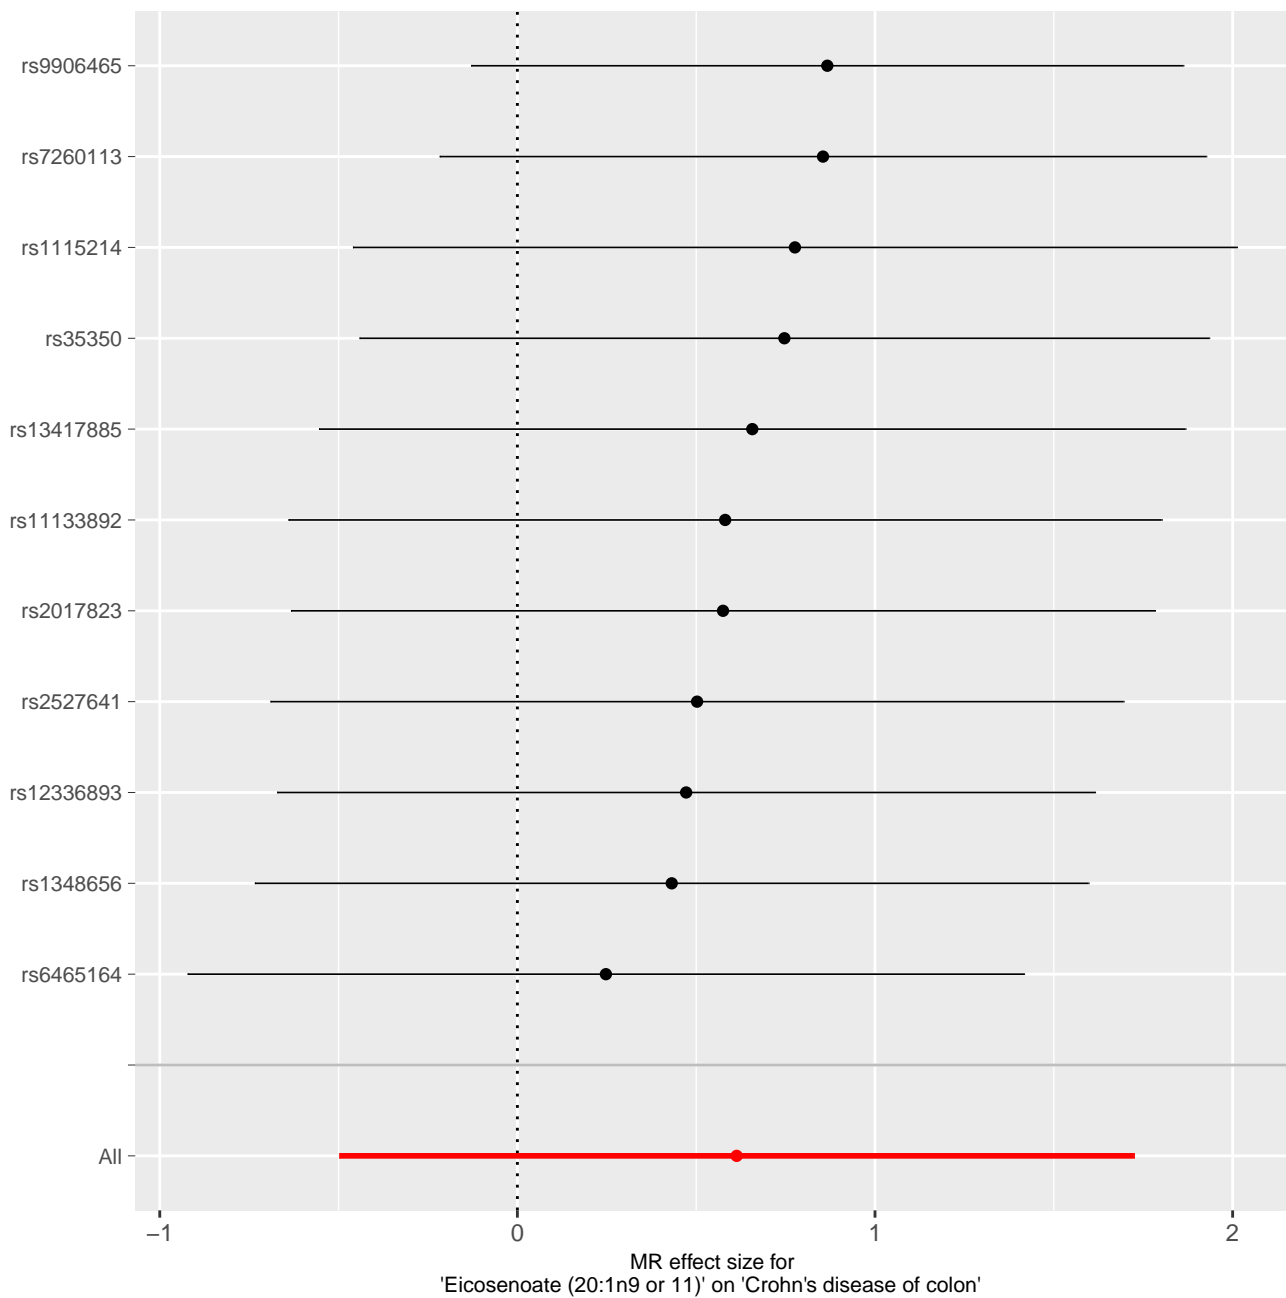



rs7775554

rs6804368

rs8002180

All

-1

0

1

MR effect size for  
'X-12244--N-acetylcarnosine' on 'Crohn's disease of colon'

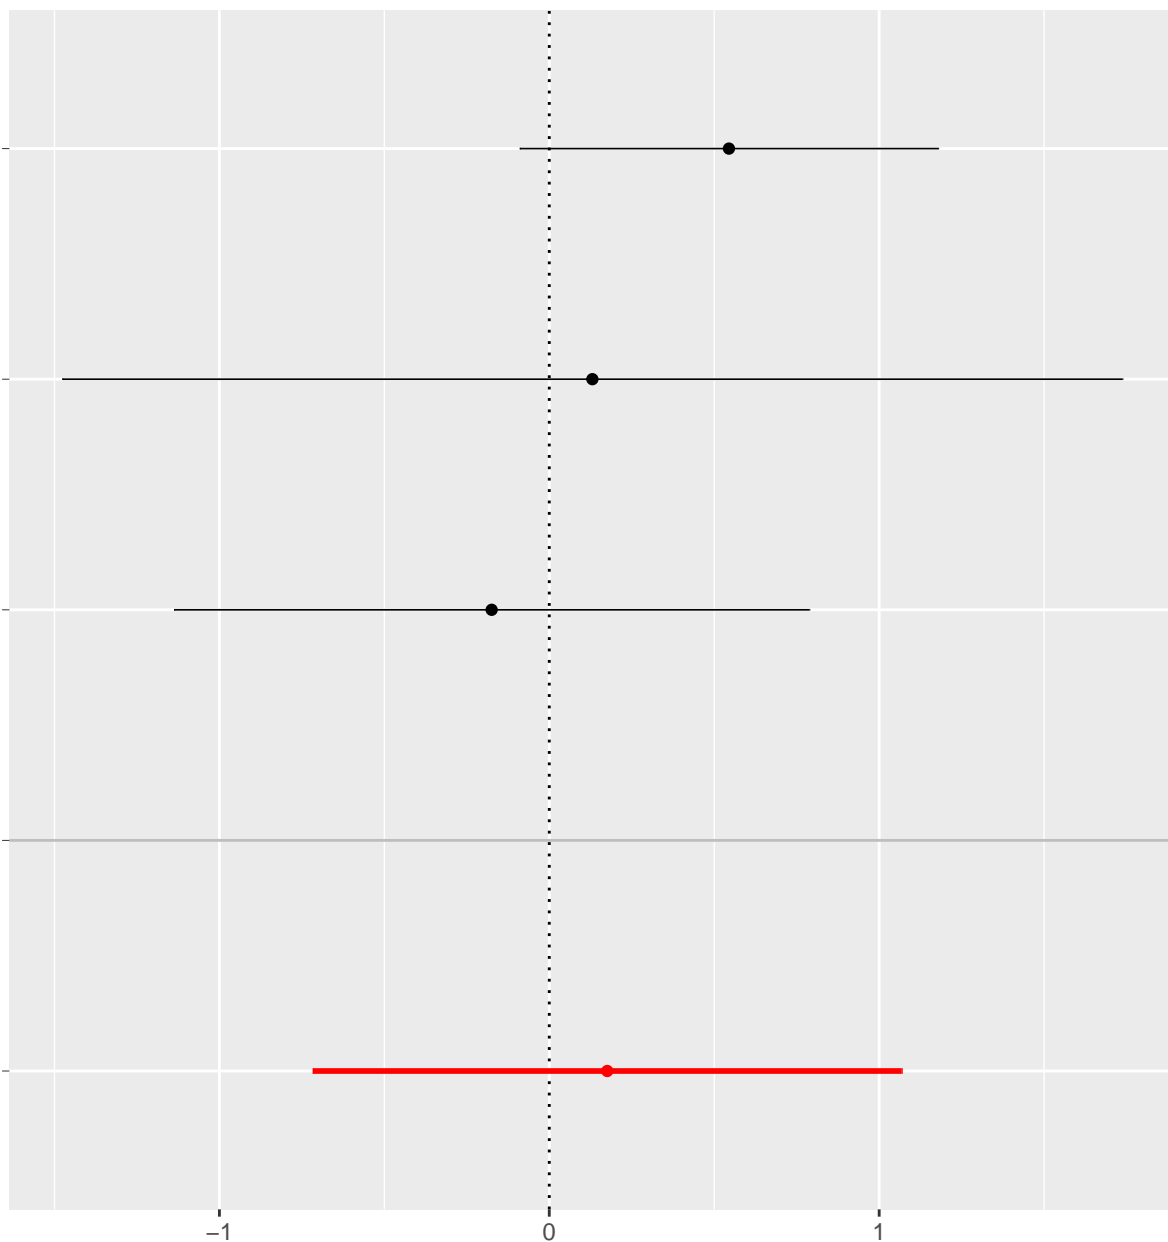

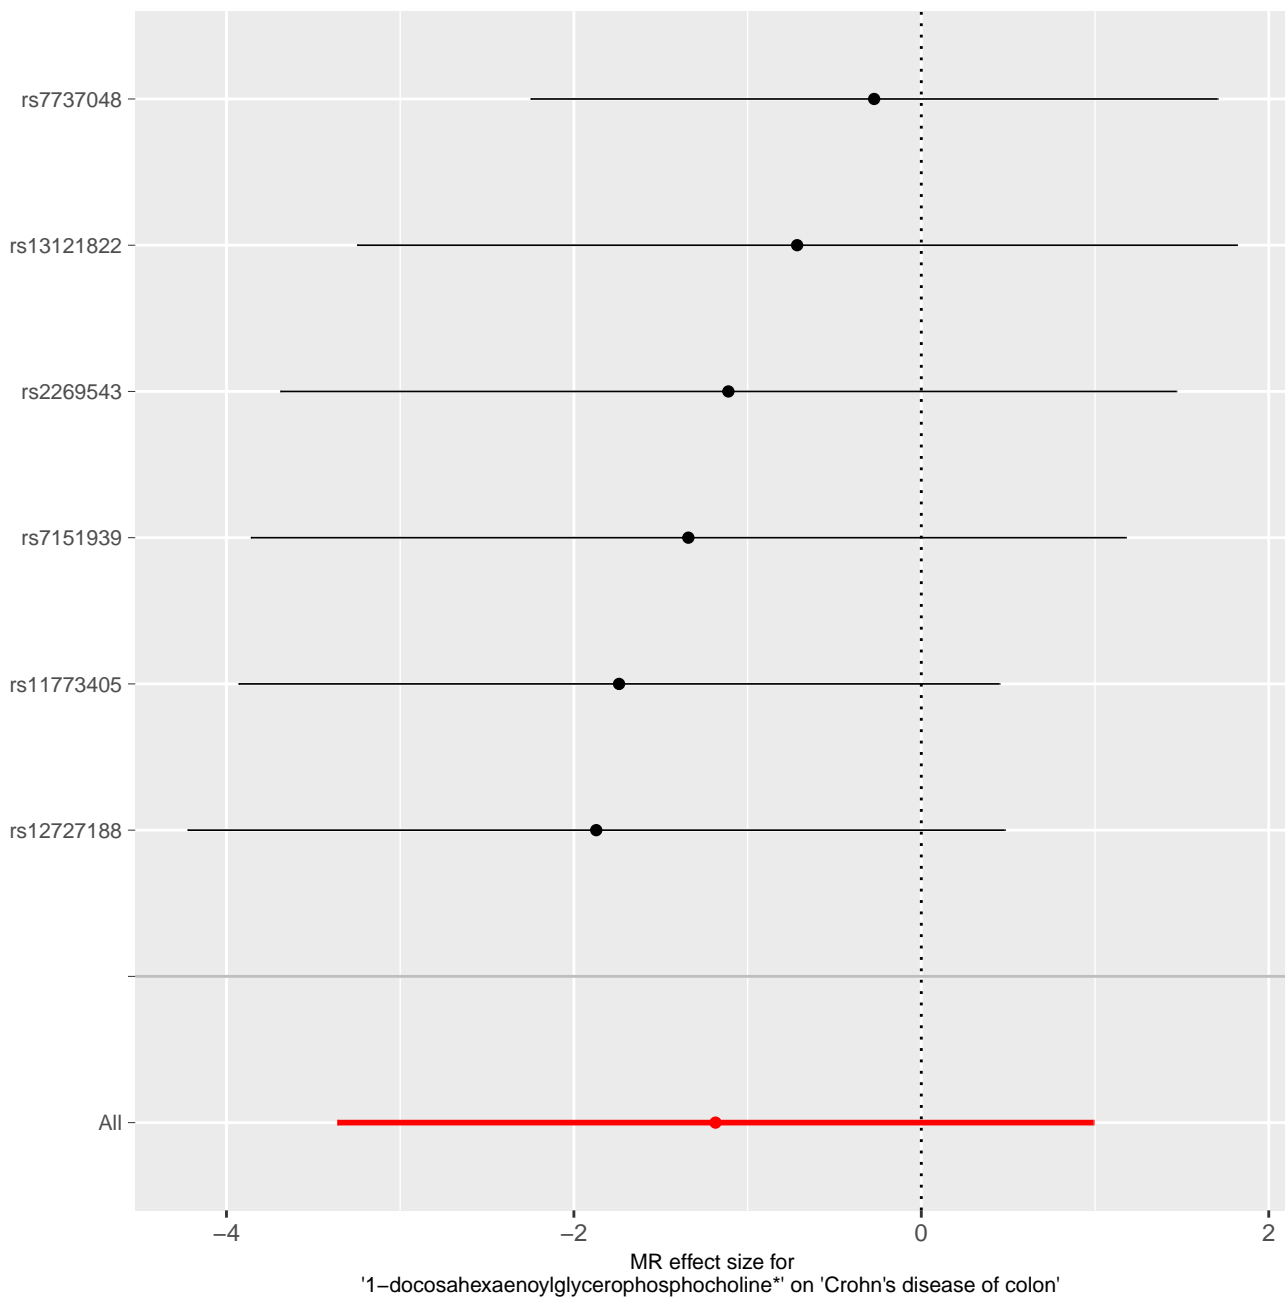

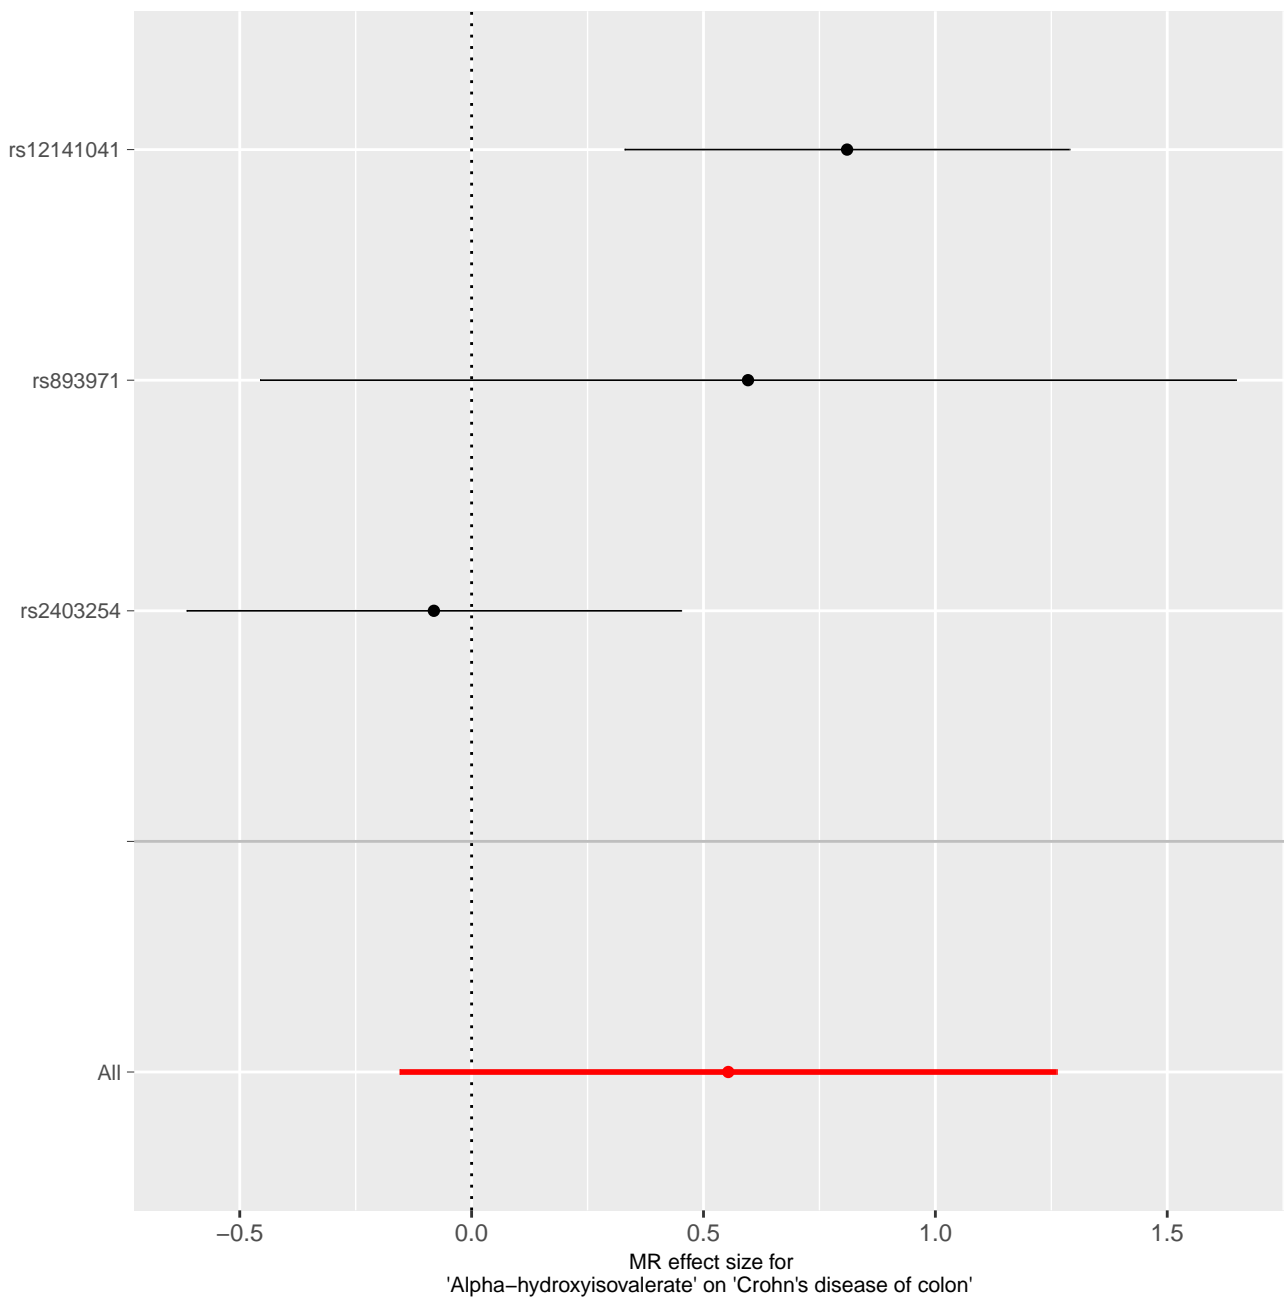

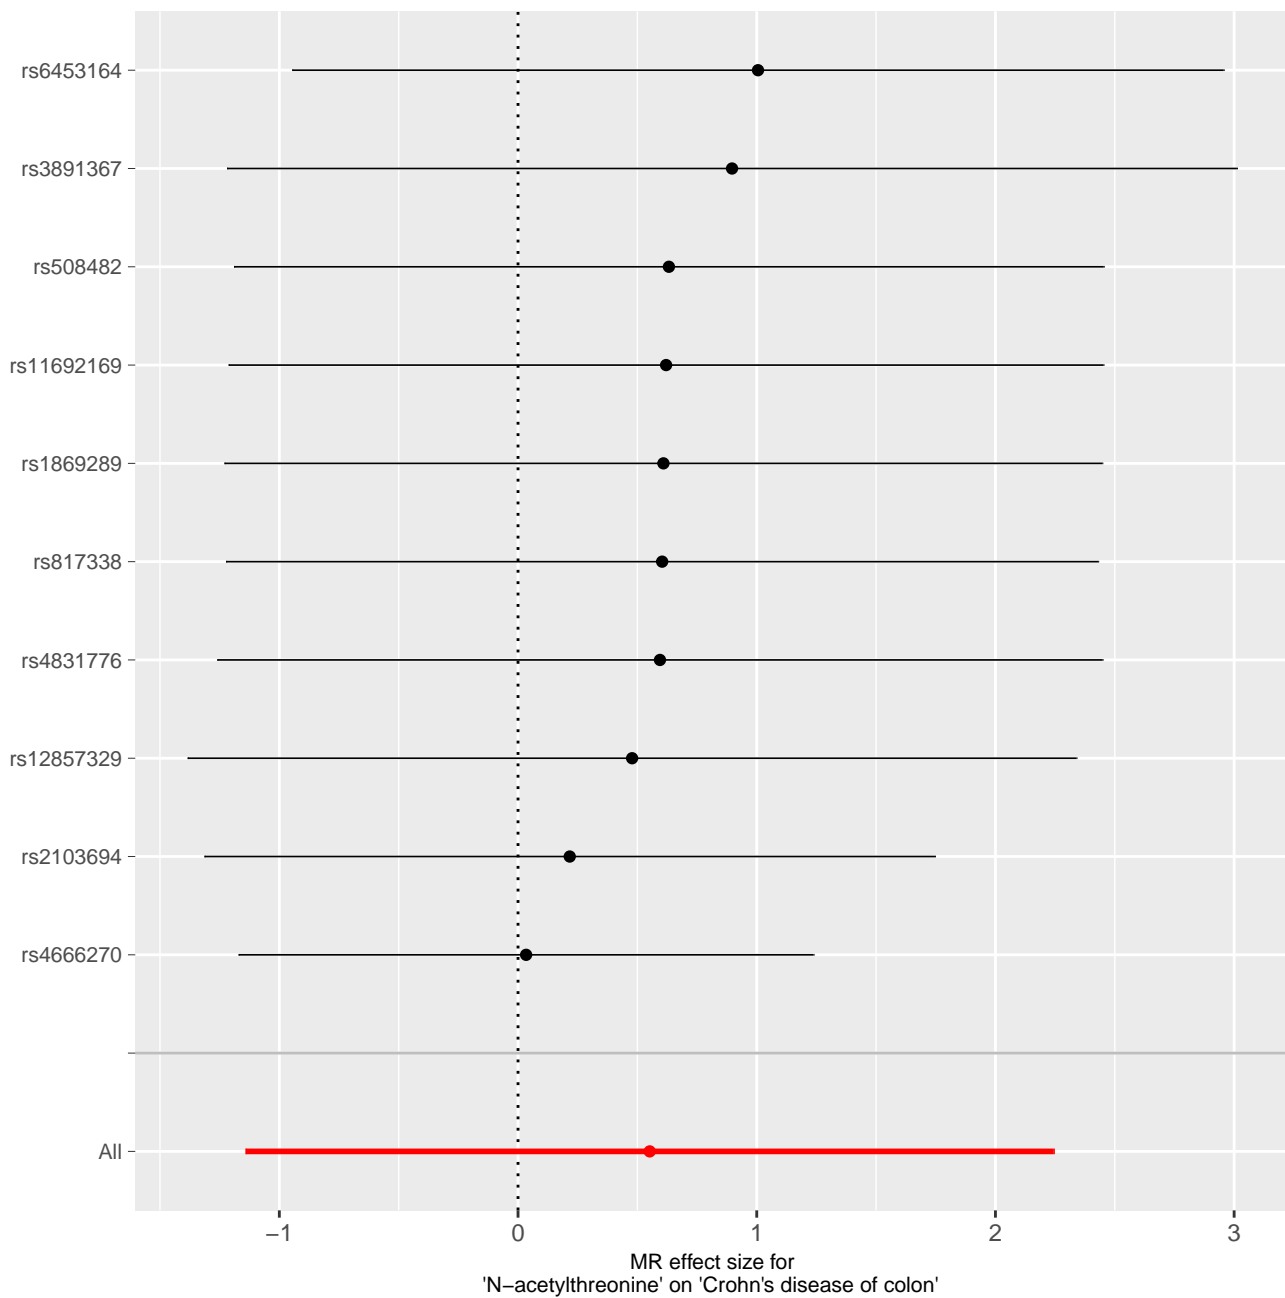

rs2062541

rs8396

rs7552404

All

-1

0

1

2

MR effect size for  
'Decanoylcarnitine' on 'Crohn's disease of colon'

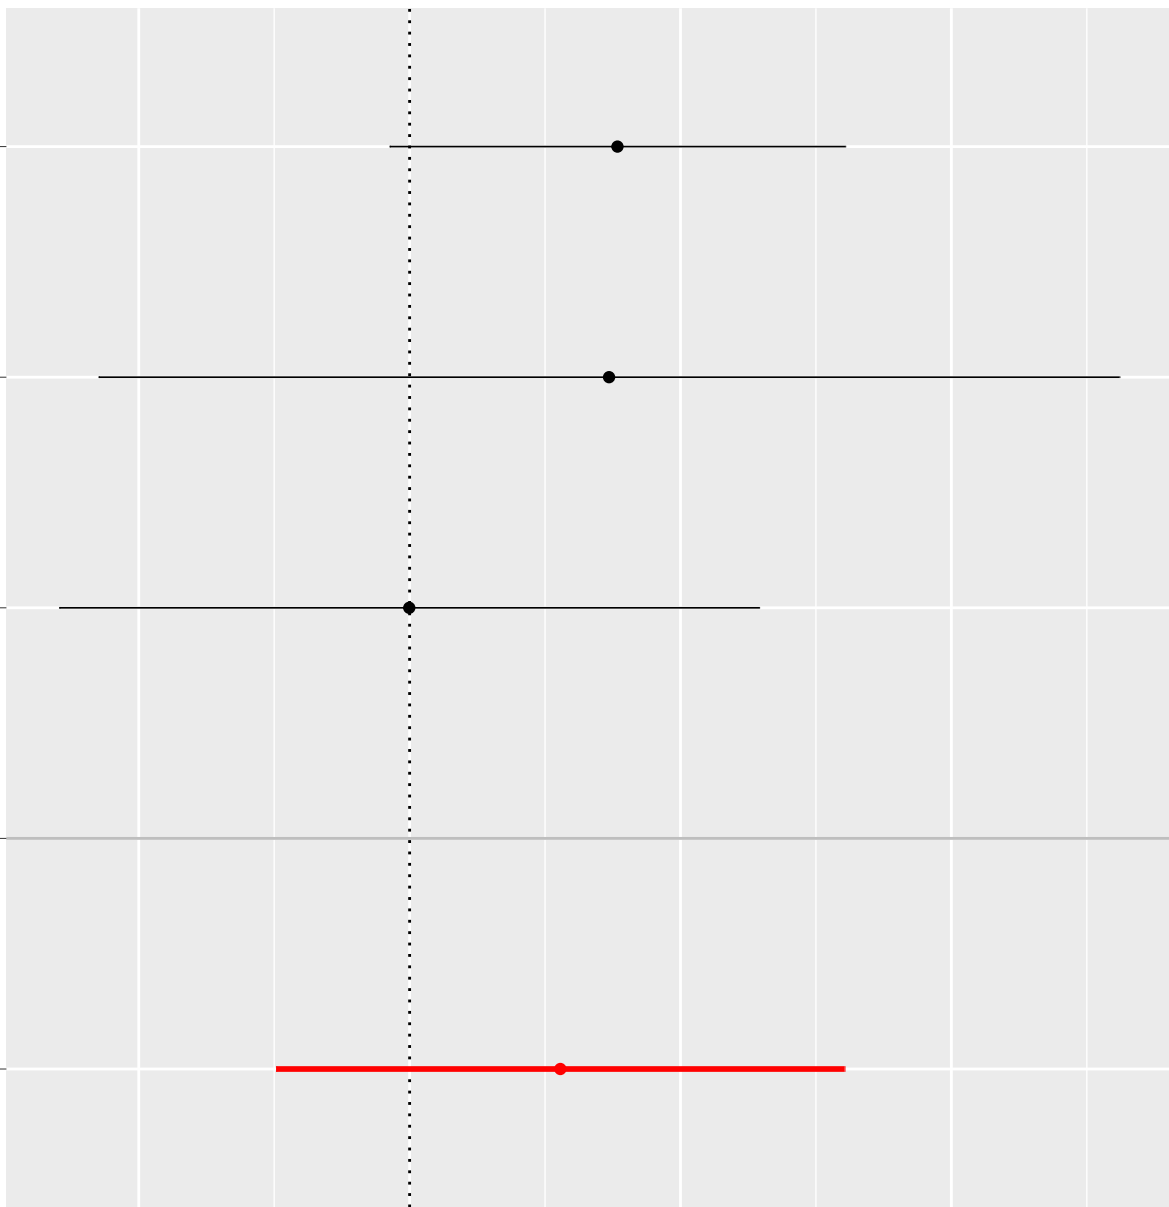

Batch 197 : 1-palmitoylglycerophosphocholine on Crohn's disease of colon

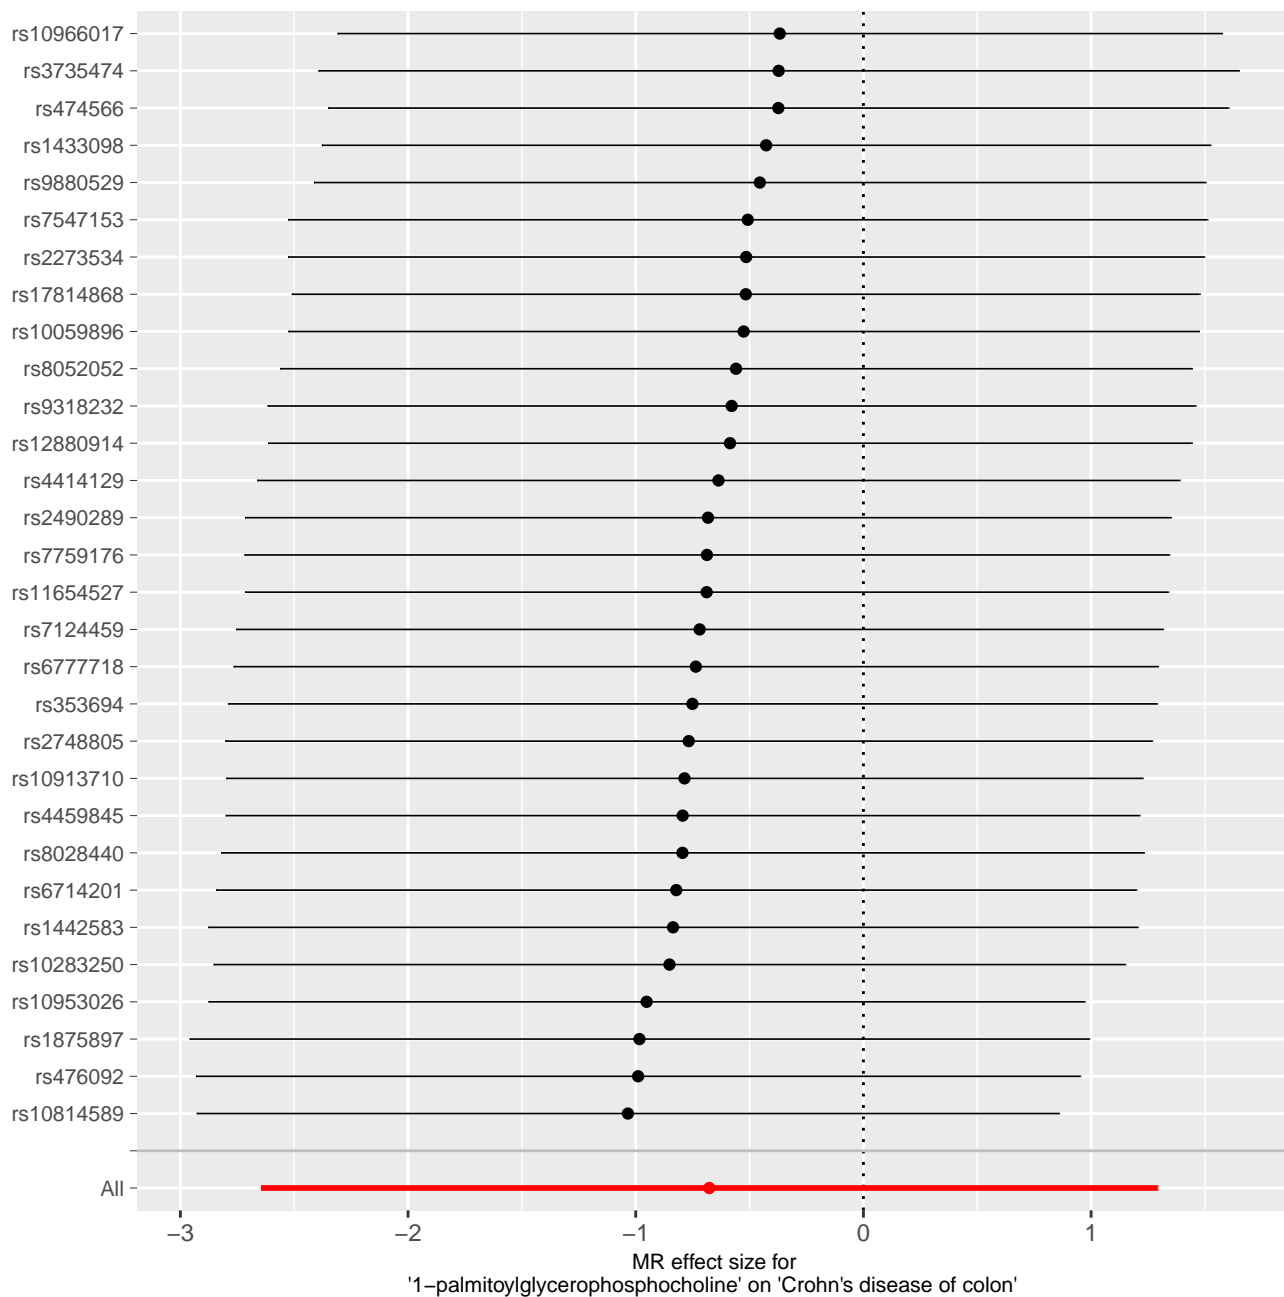

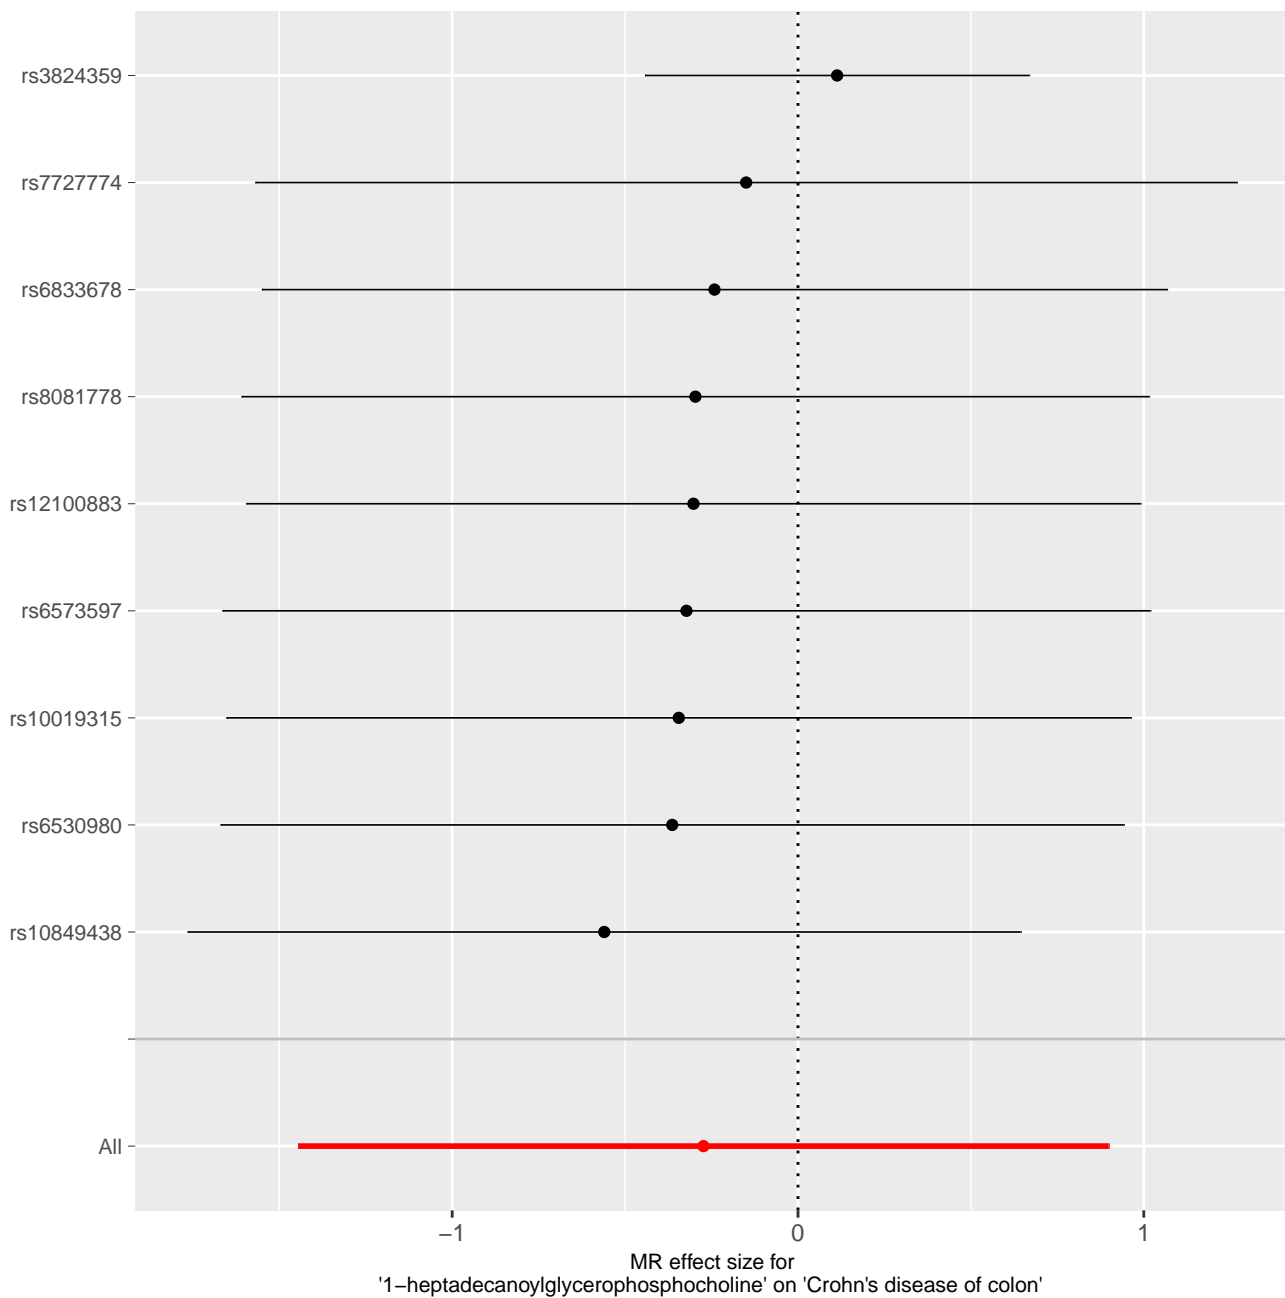

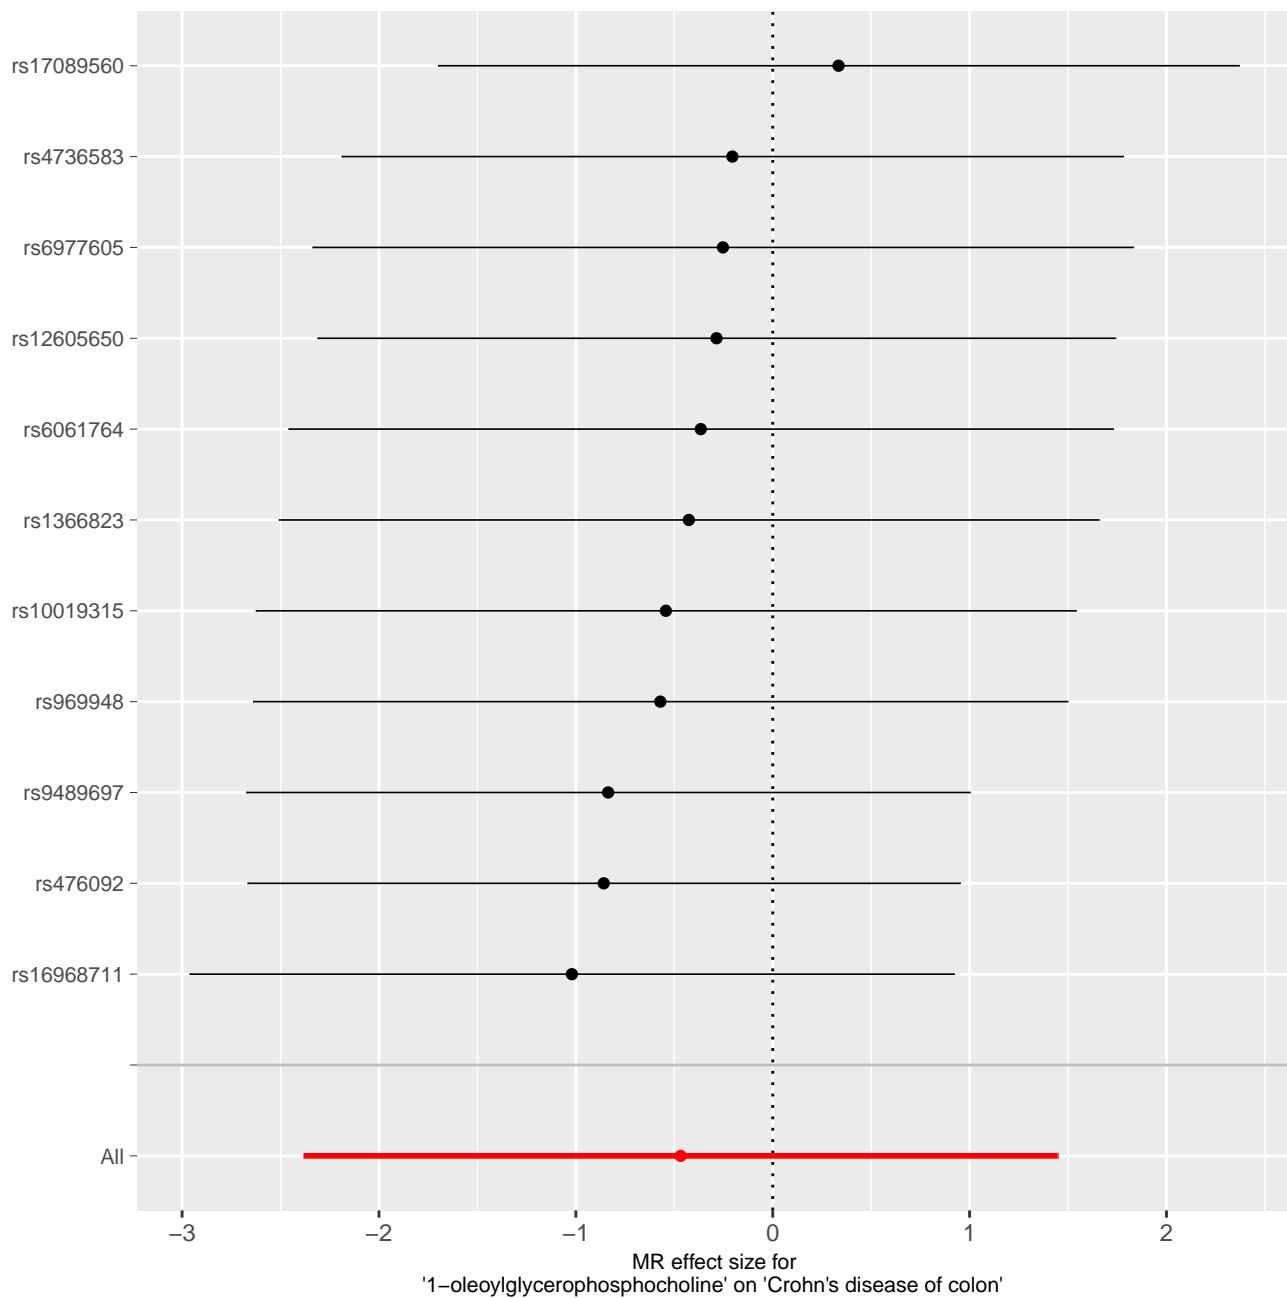



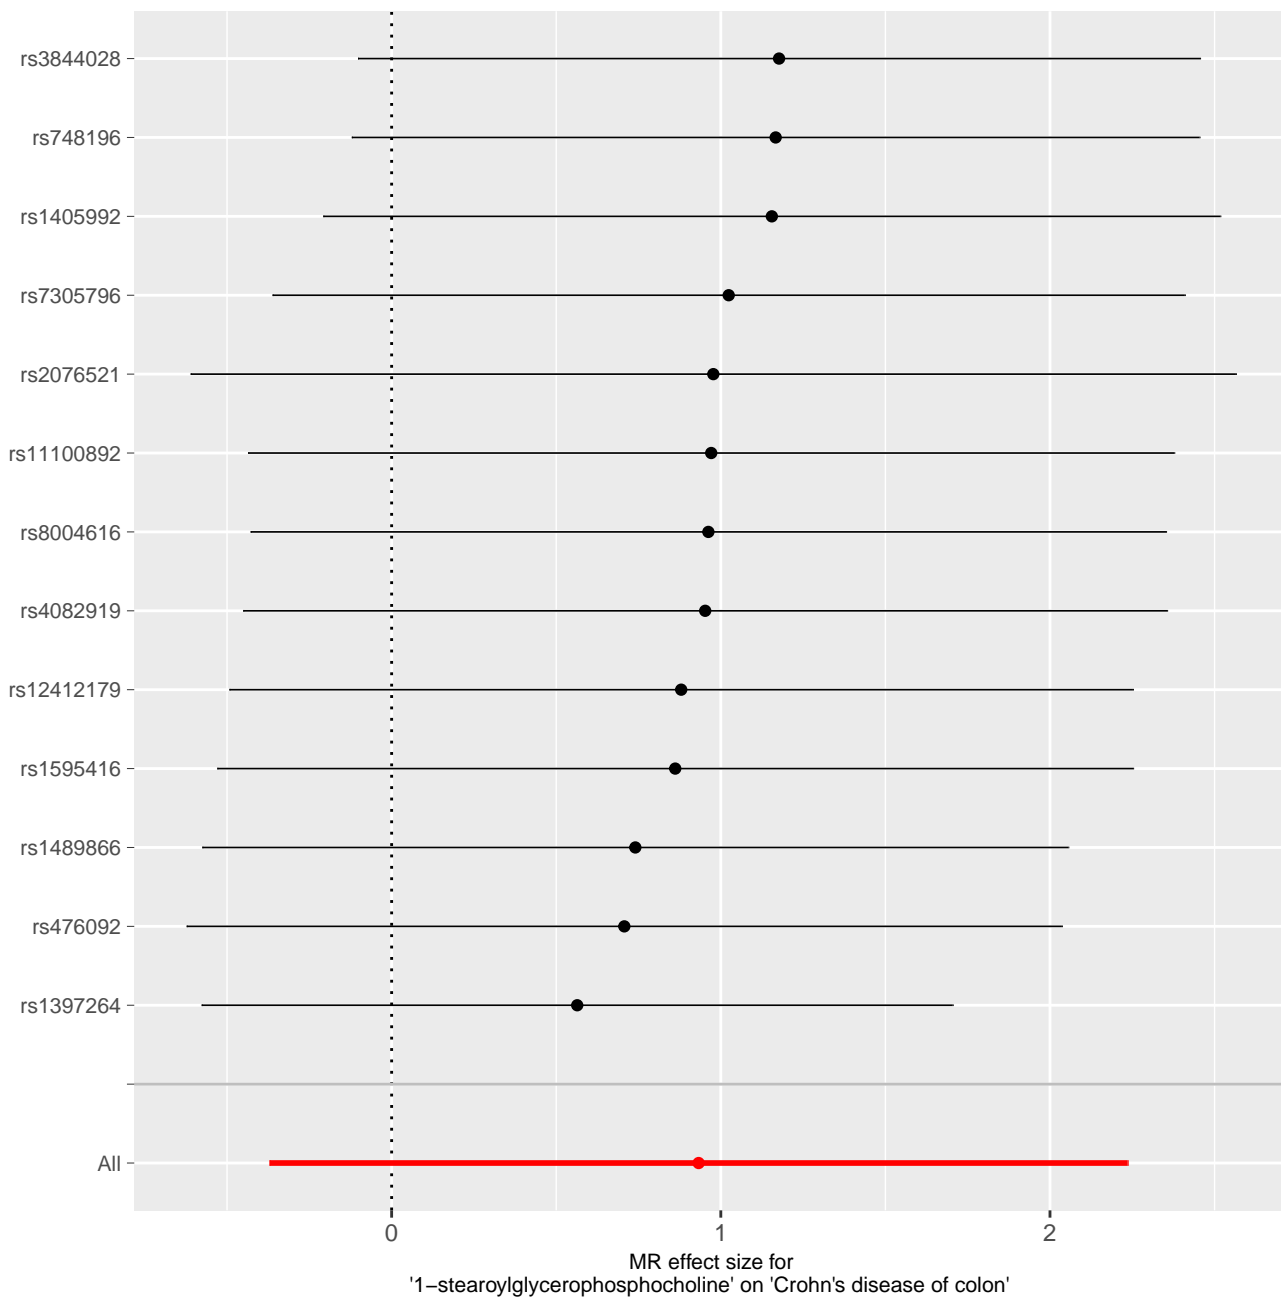

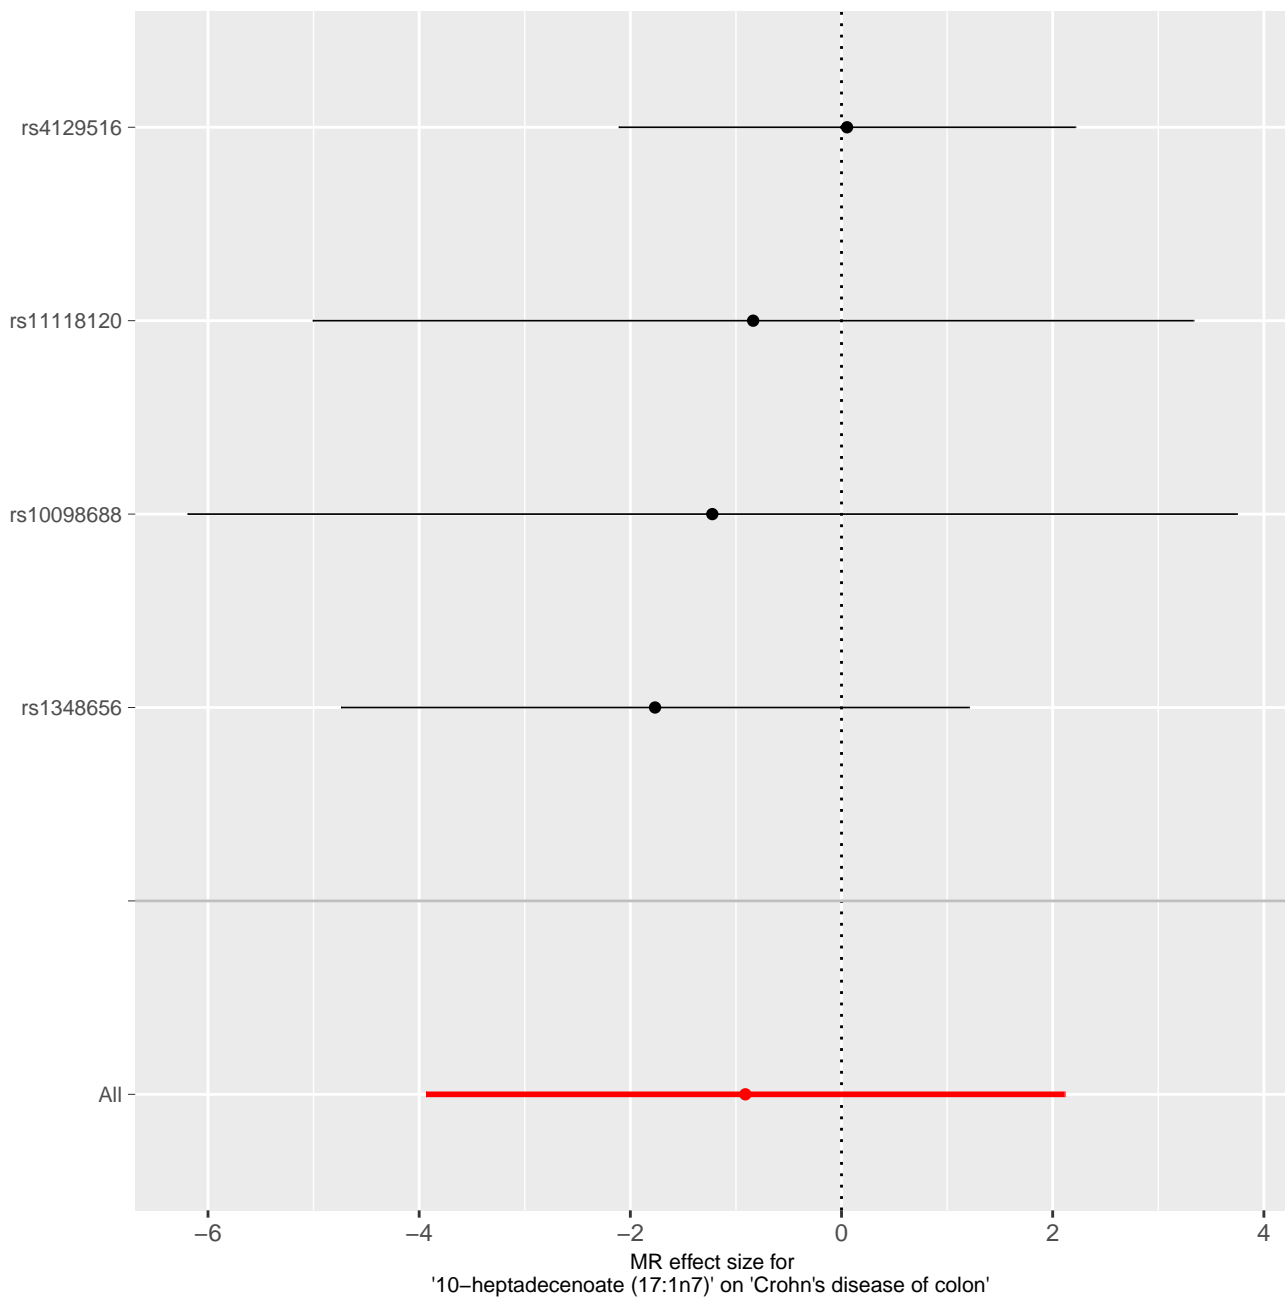

Batch 206 : Linolenate [alpha or gamma; (18:3n3 or 6)] on Crohn's disease of colon

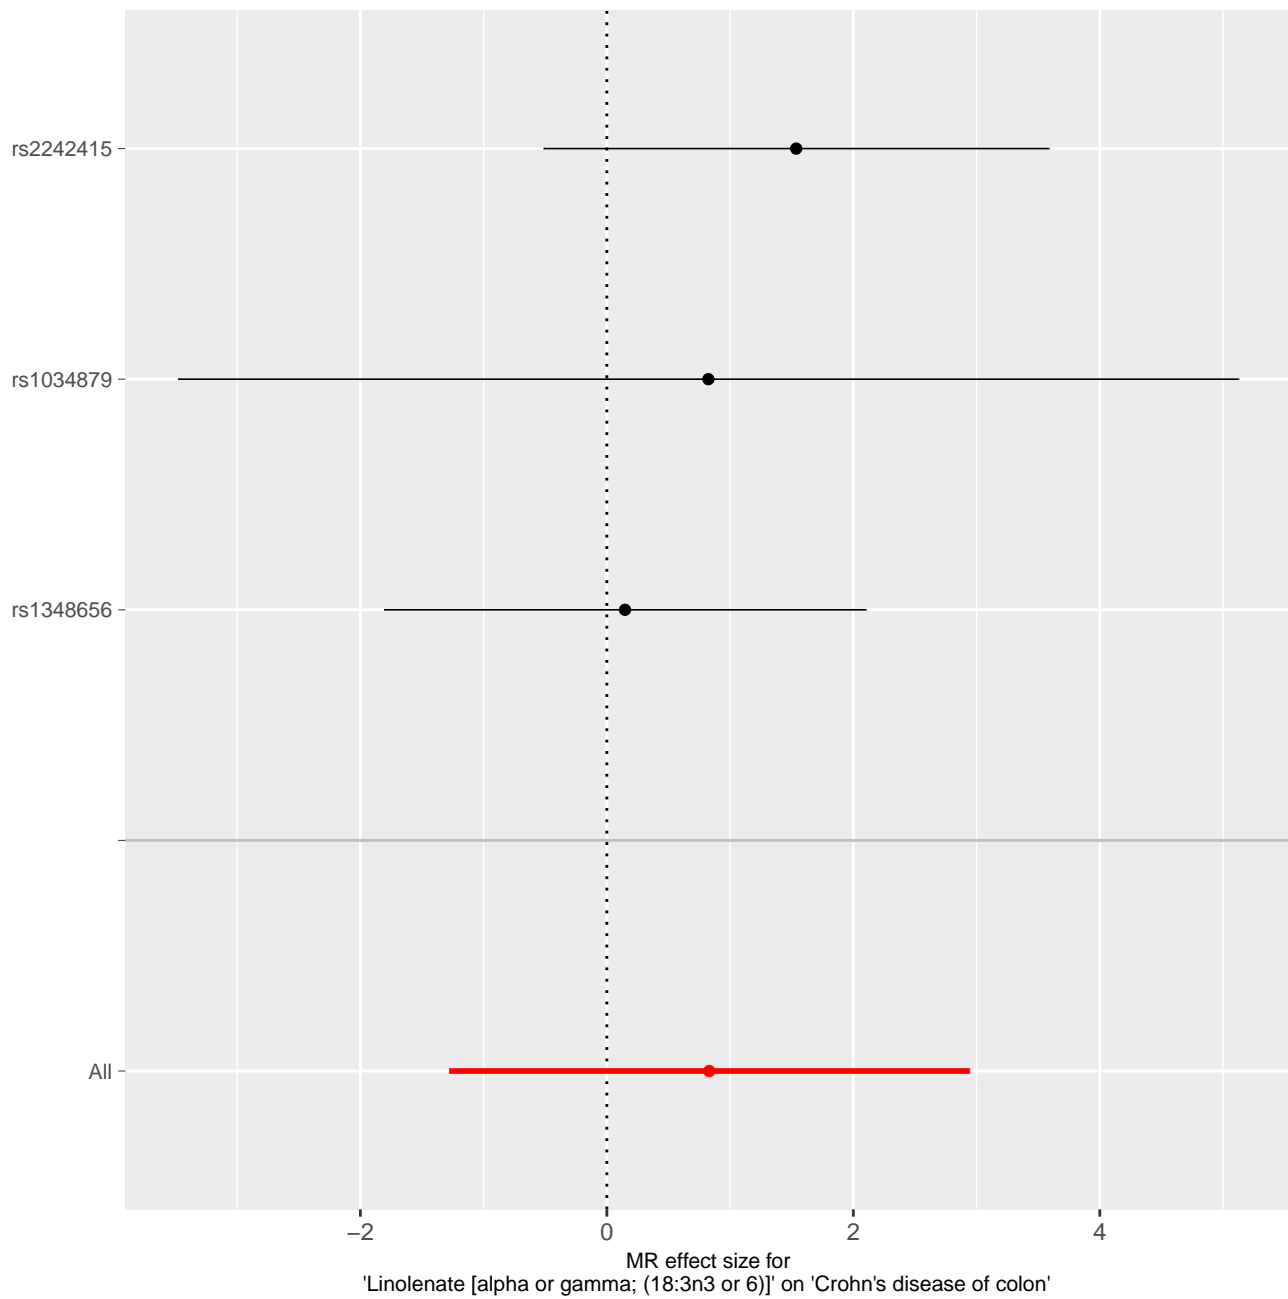

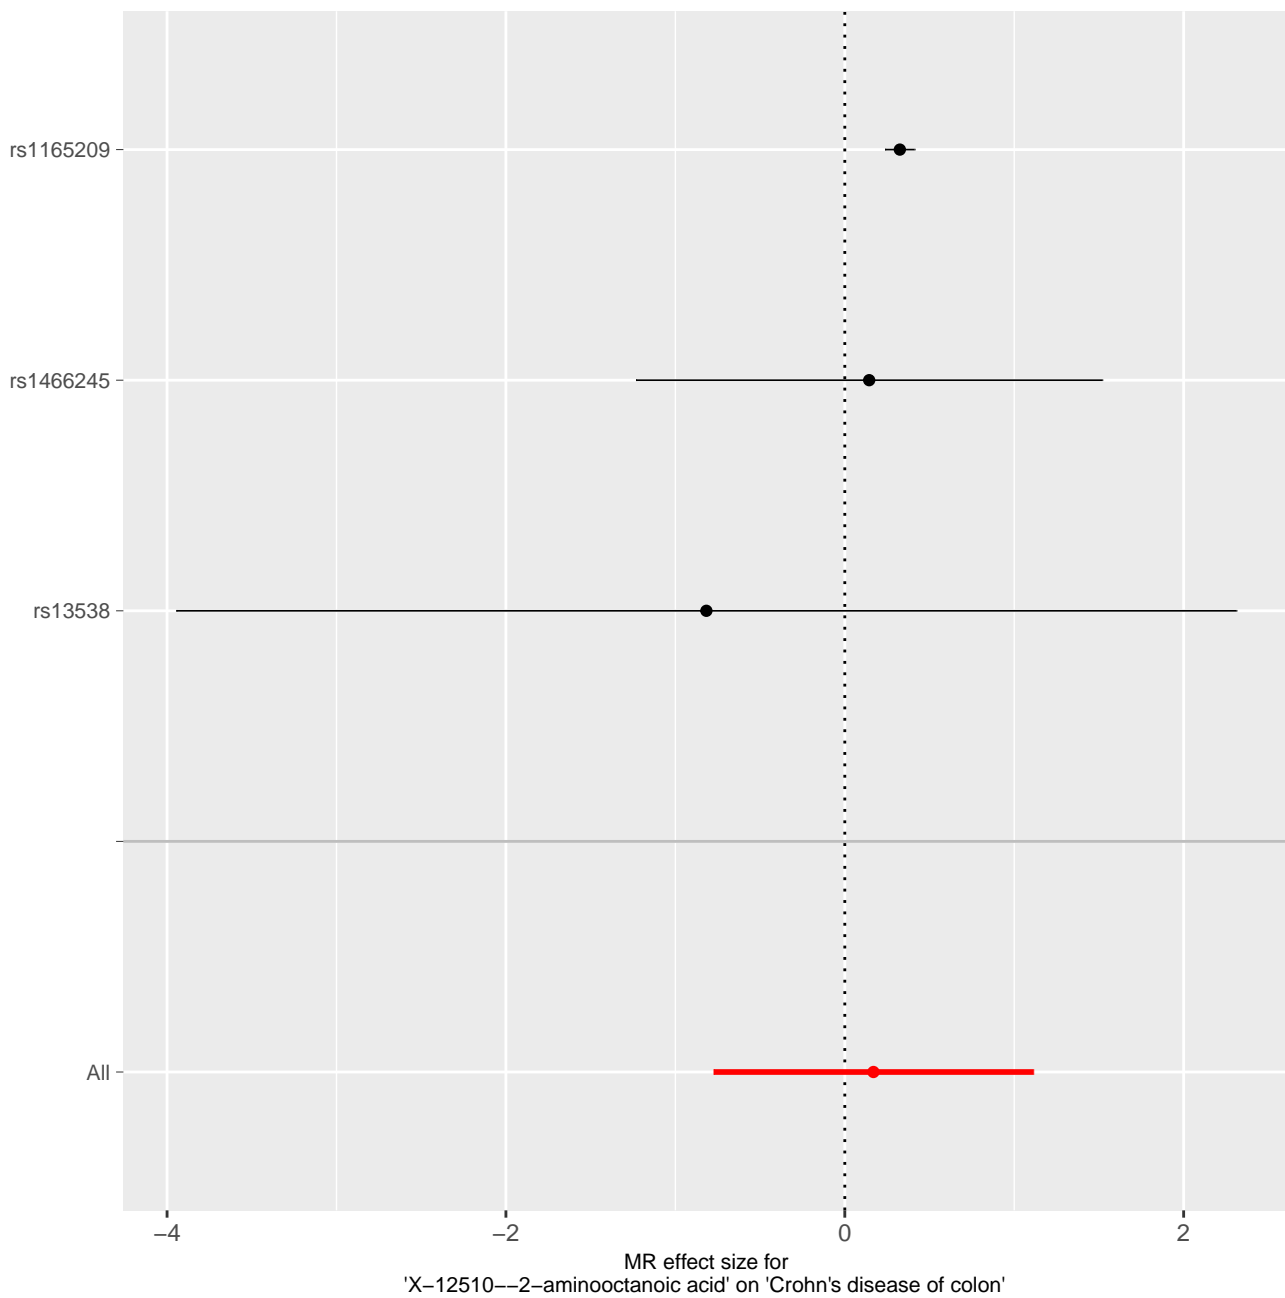

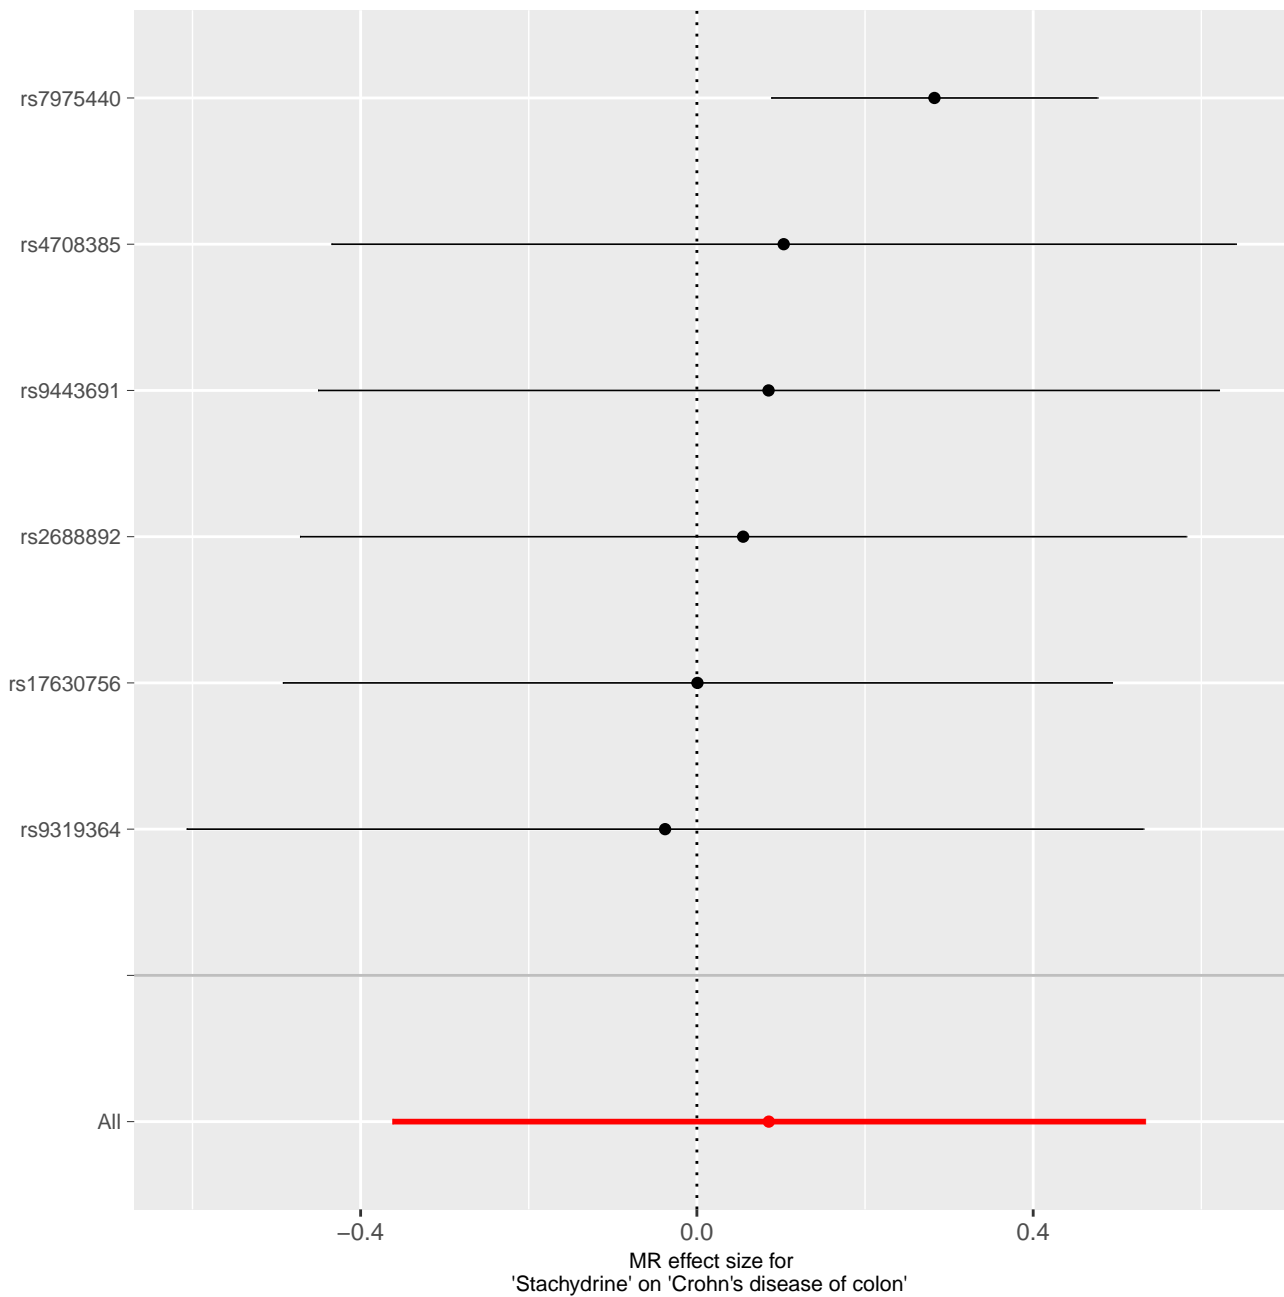

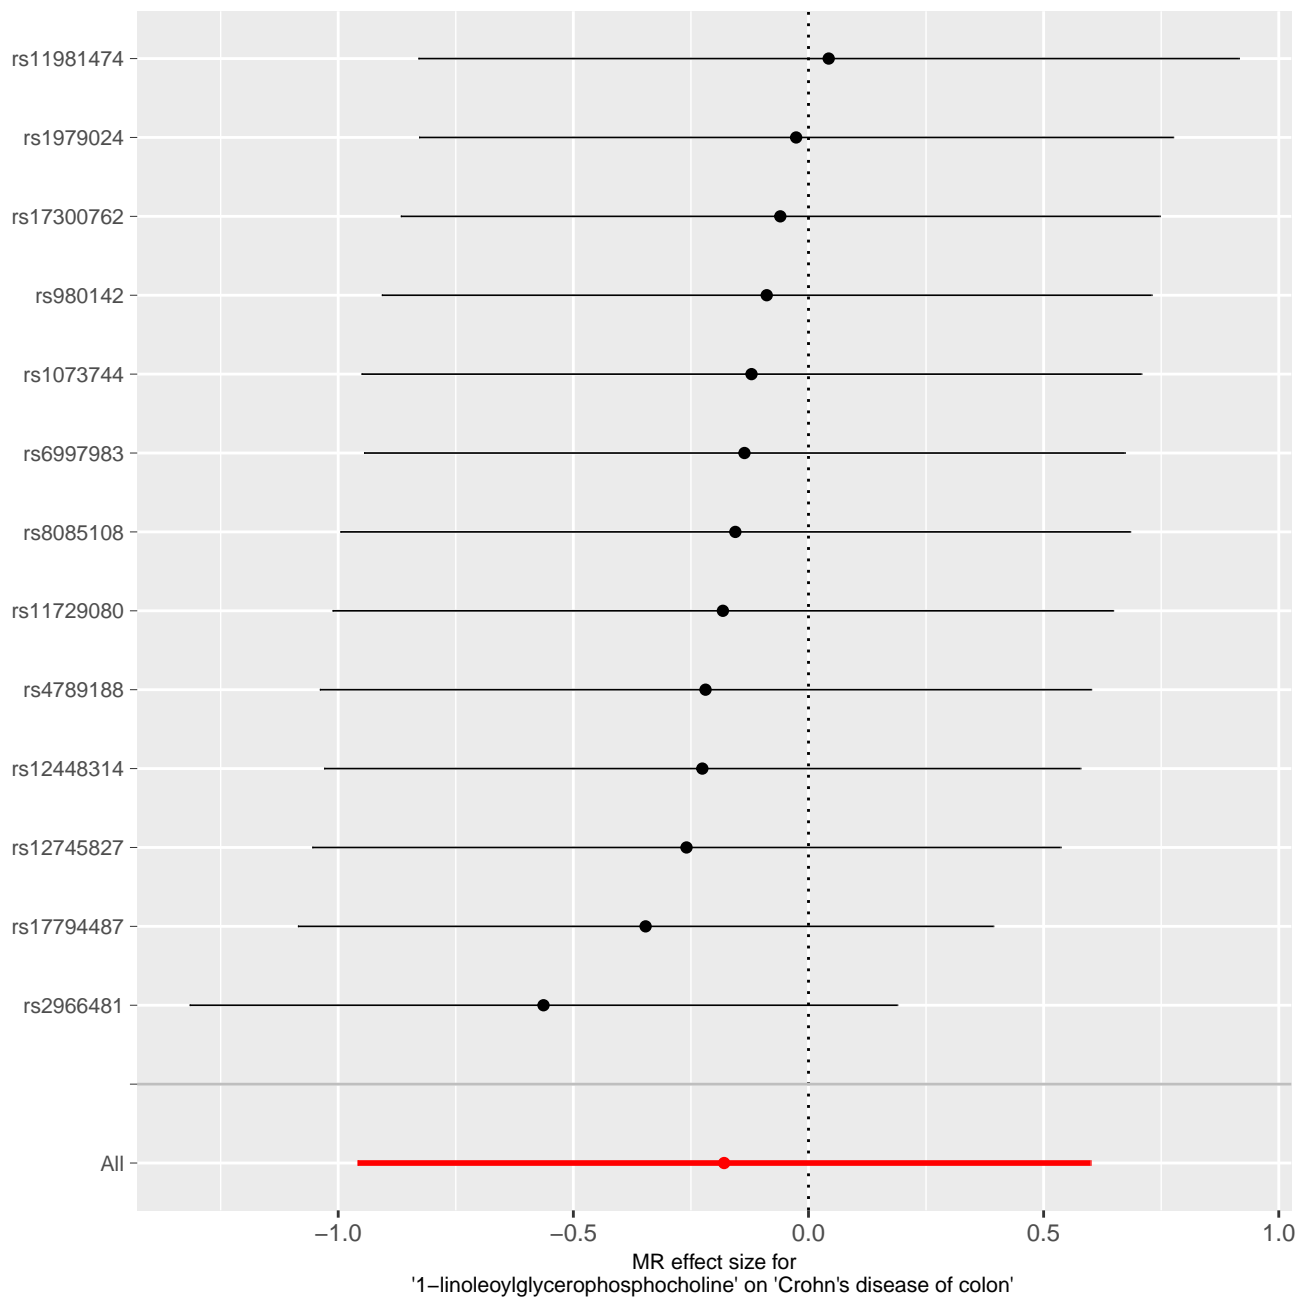

MR effect size for  
'1-linoleoylglycerophosphocholine' on 'Crohn's disease of colon'

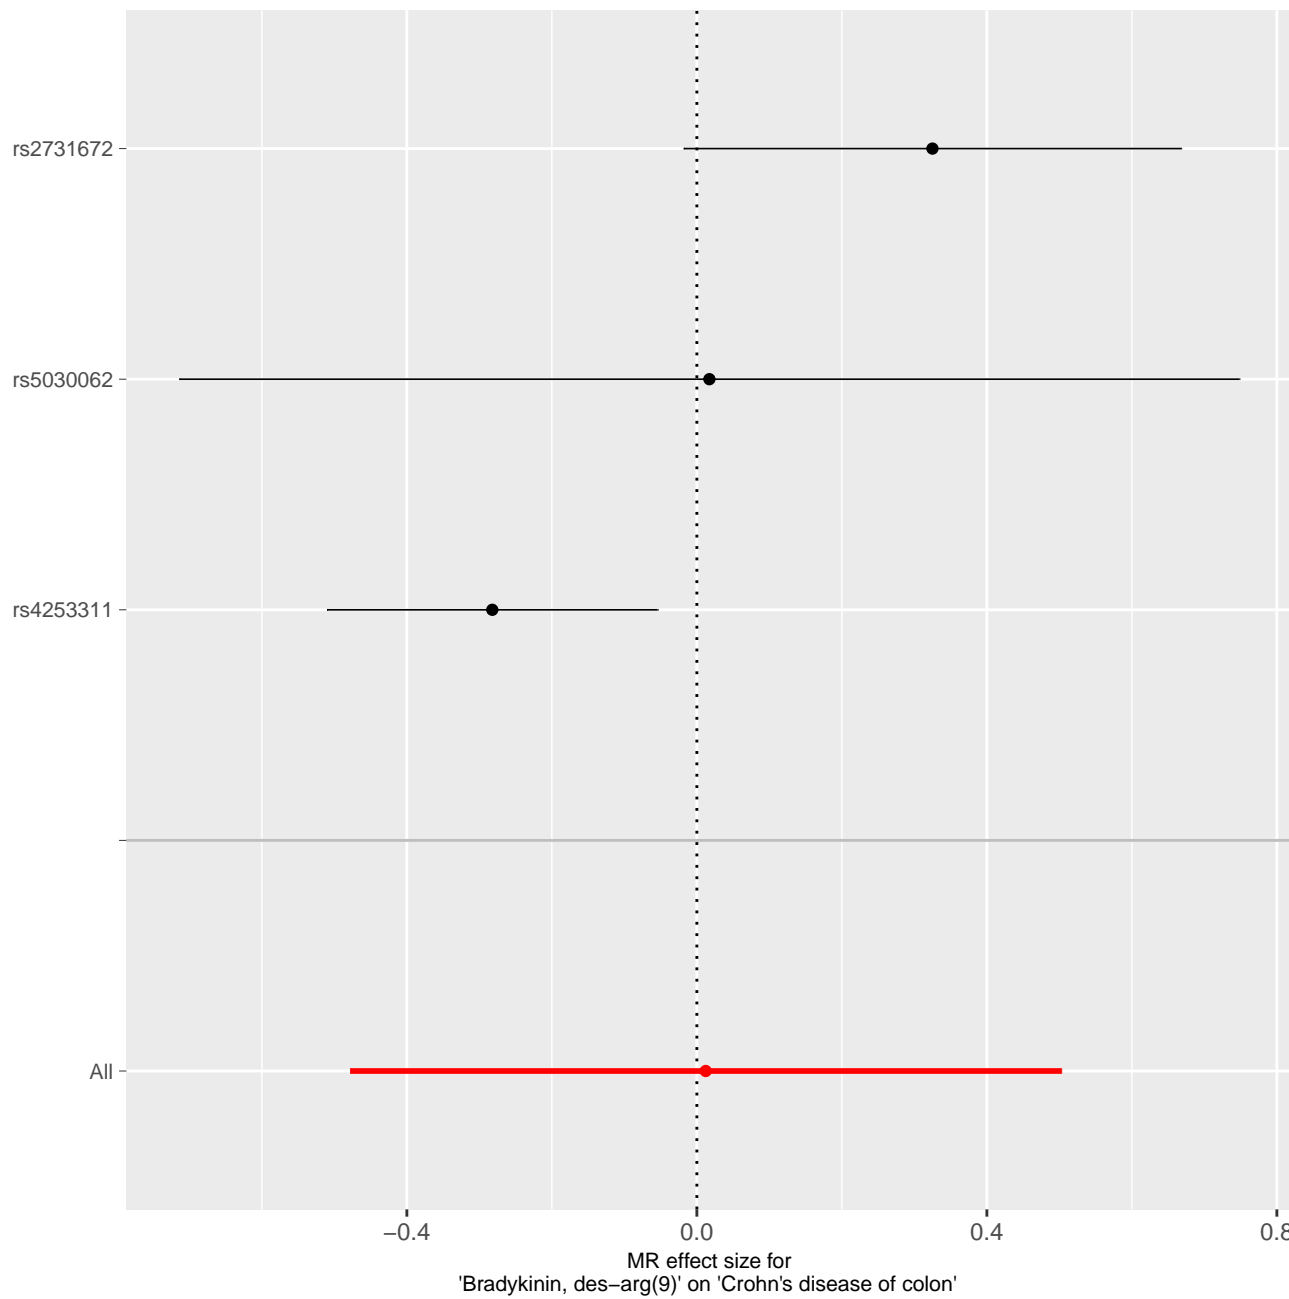

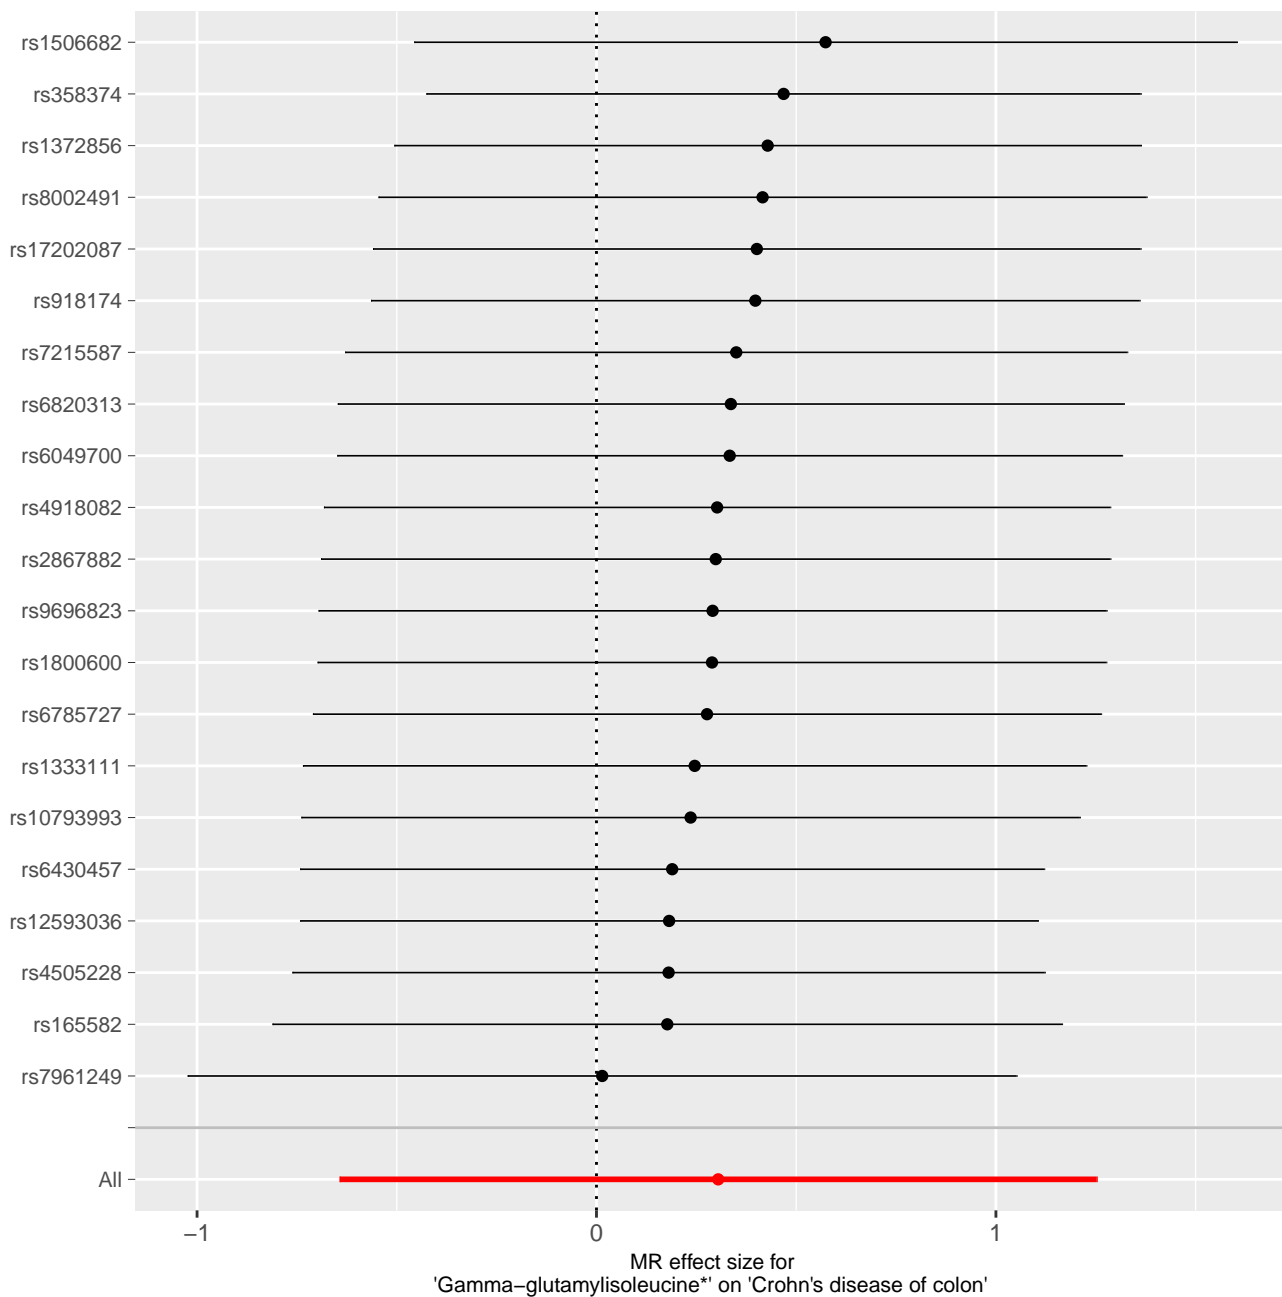



rs6907935

rs4861137

rs1456197

rs4680092

All

-4

-2

0

2

MR effect size for  
'Isovalerate' on 'Crohn's disease of colon'

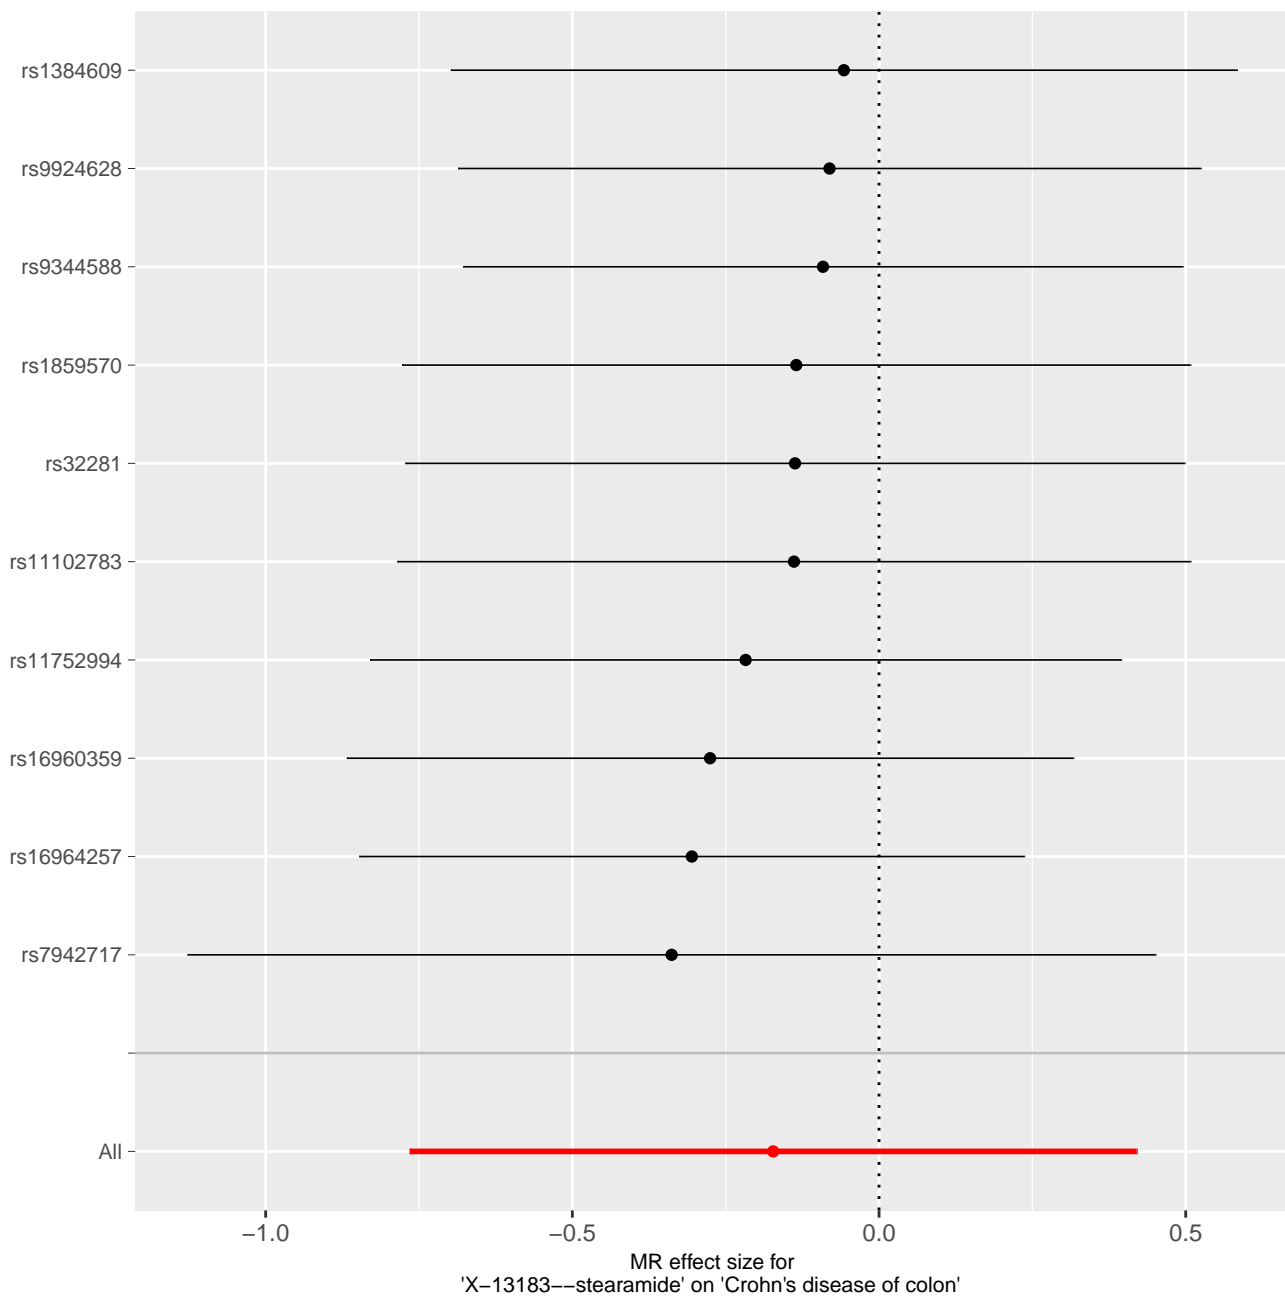

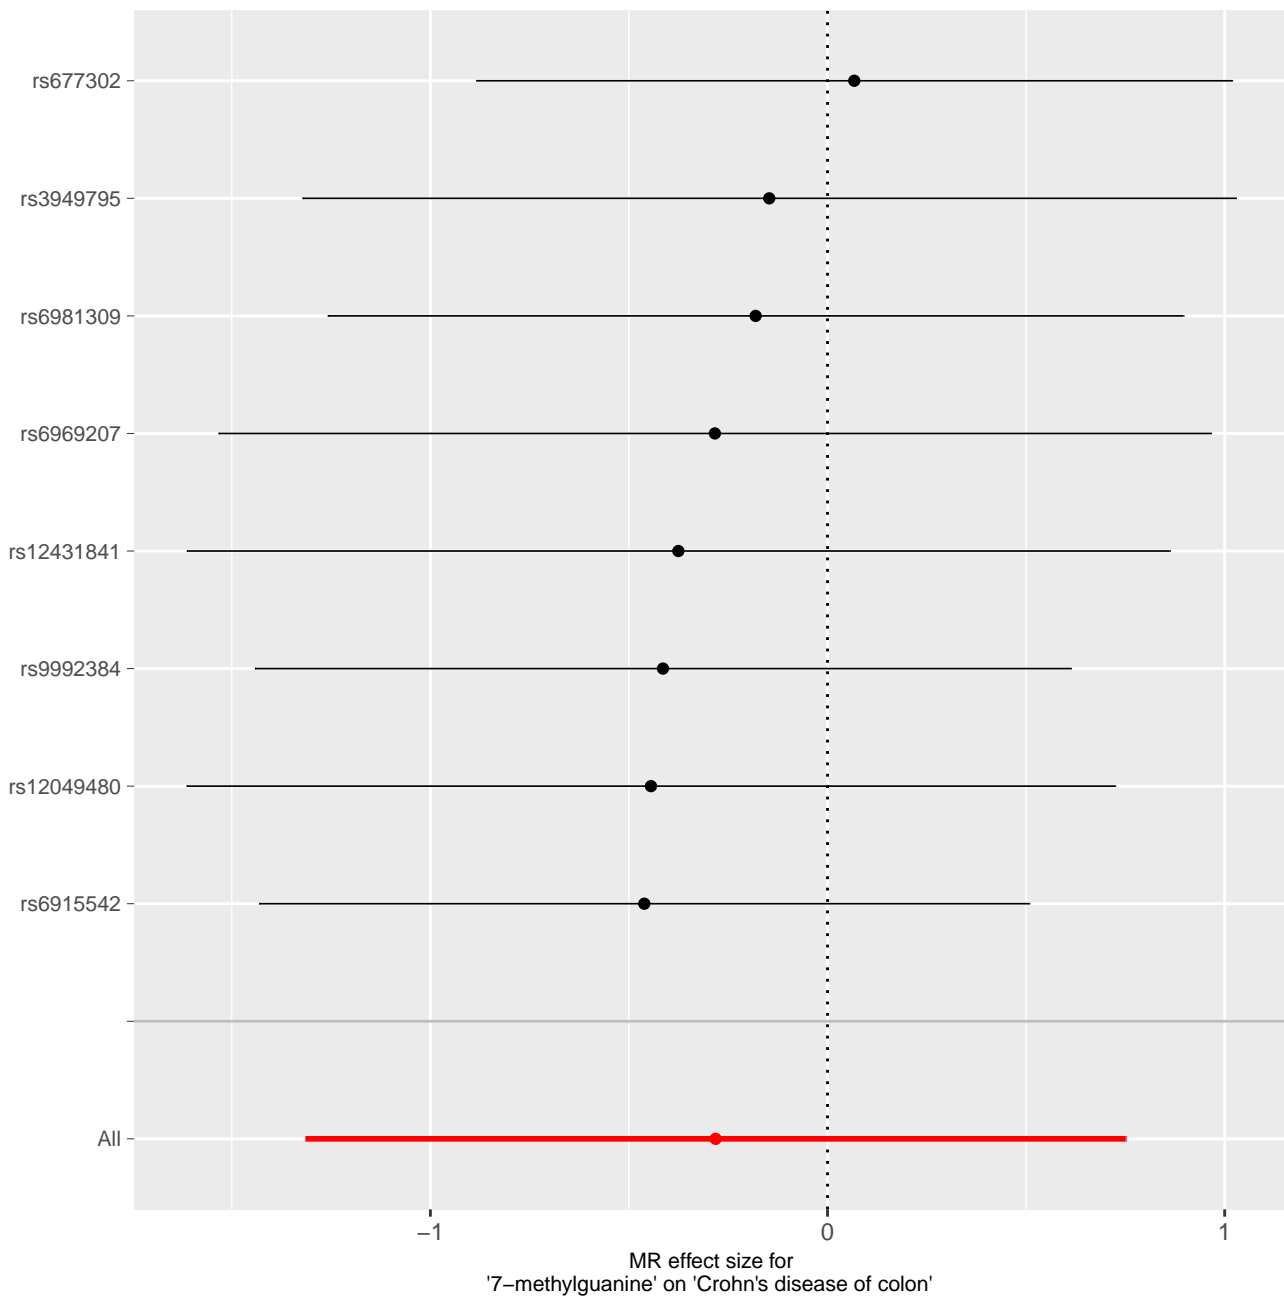

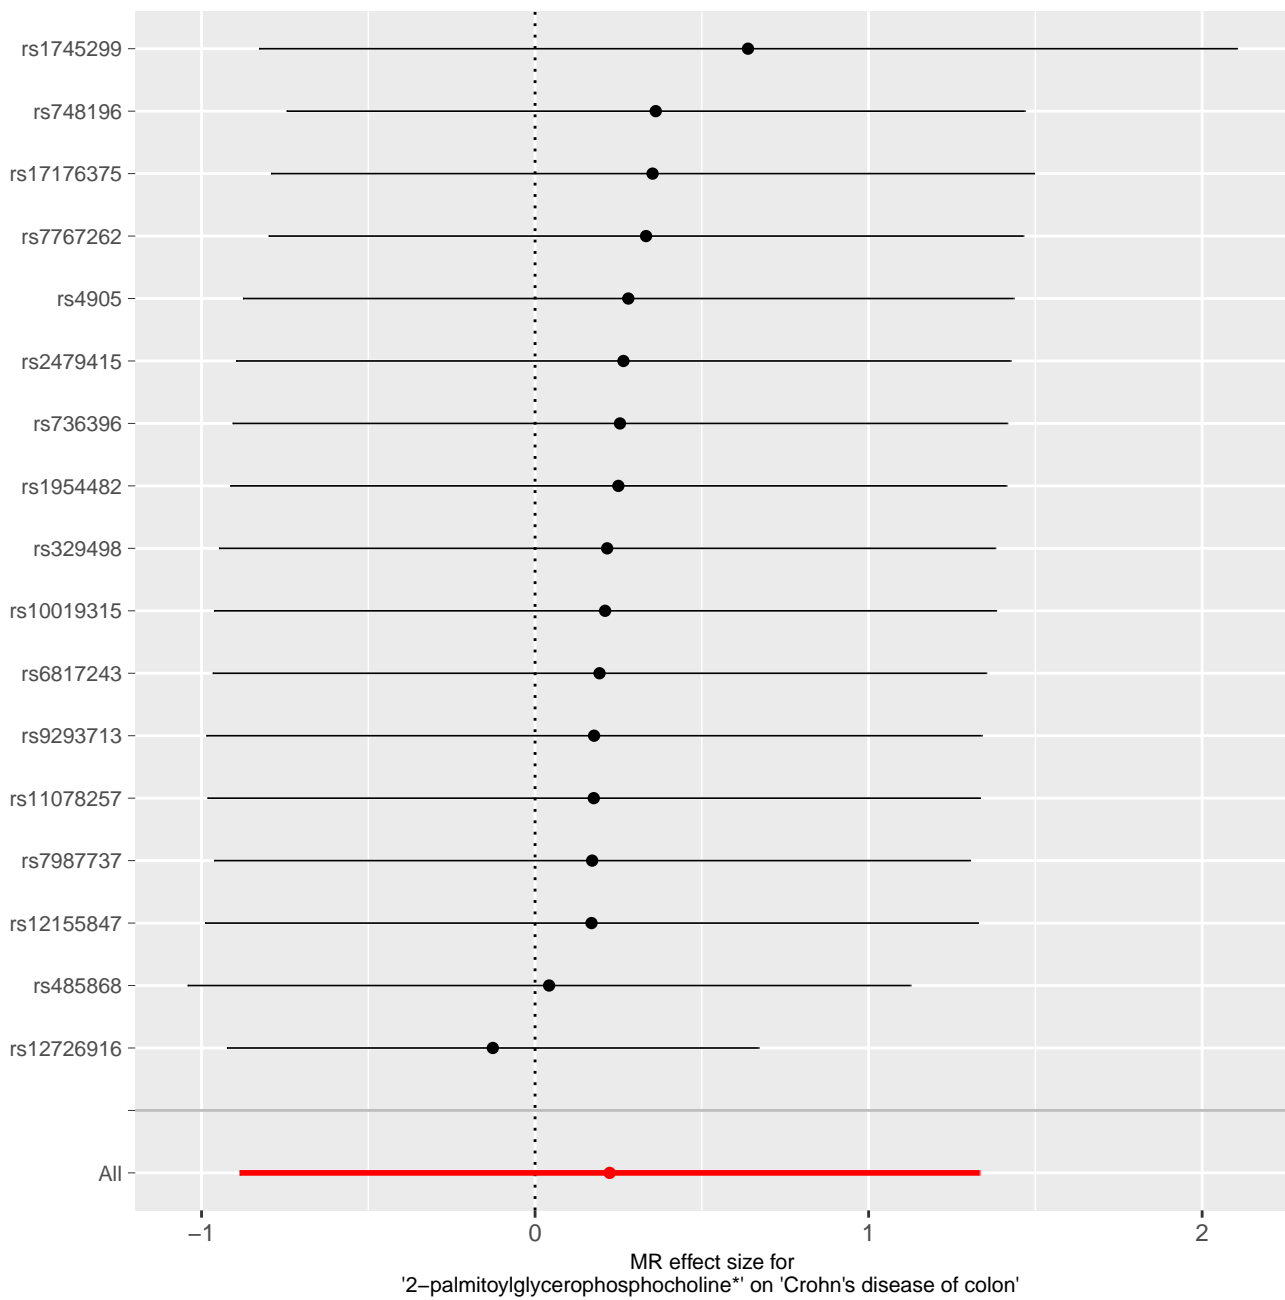

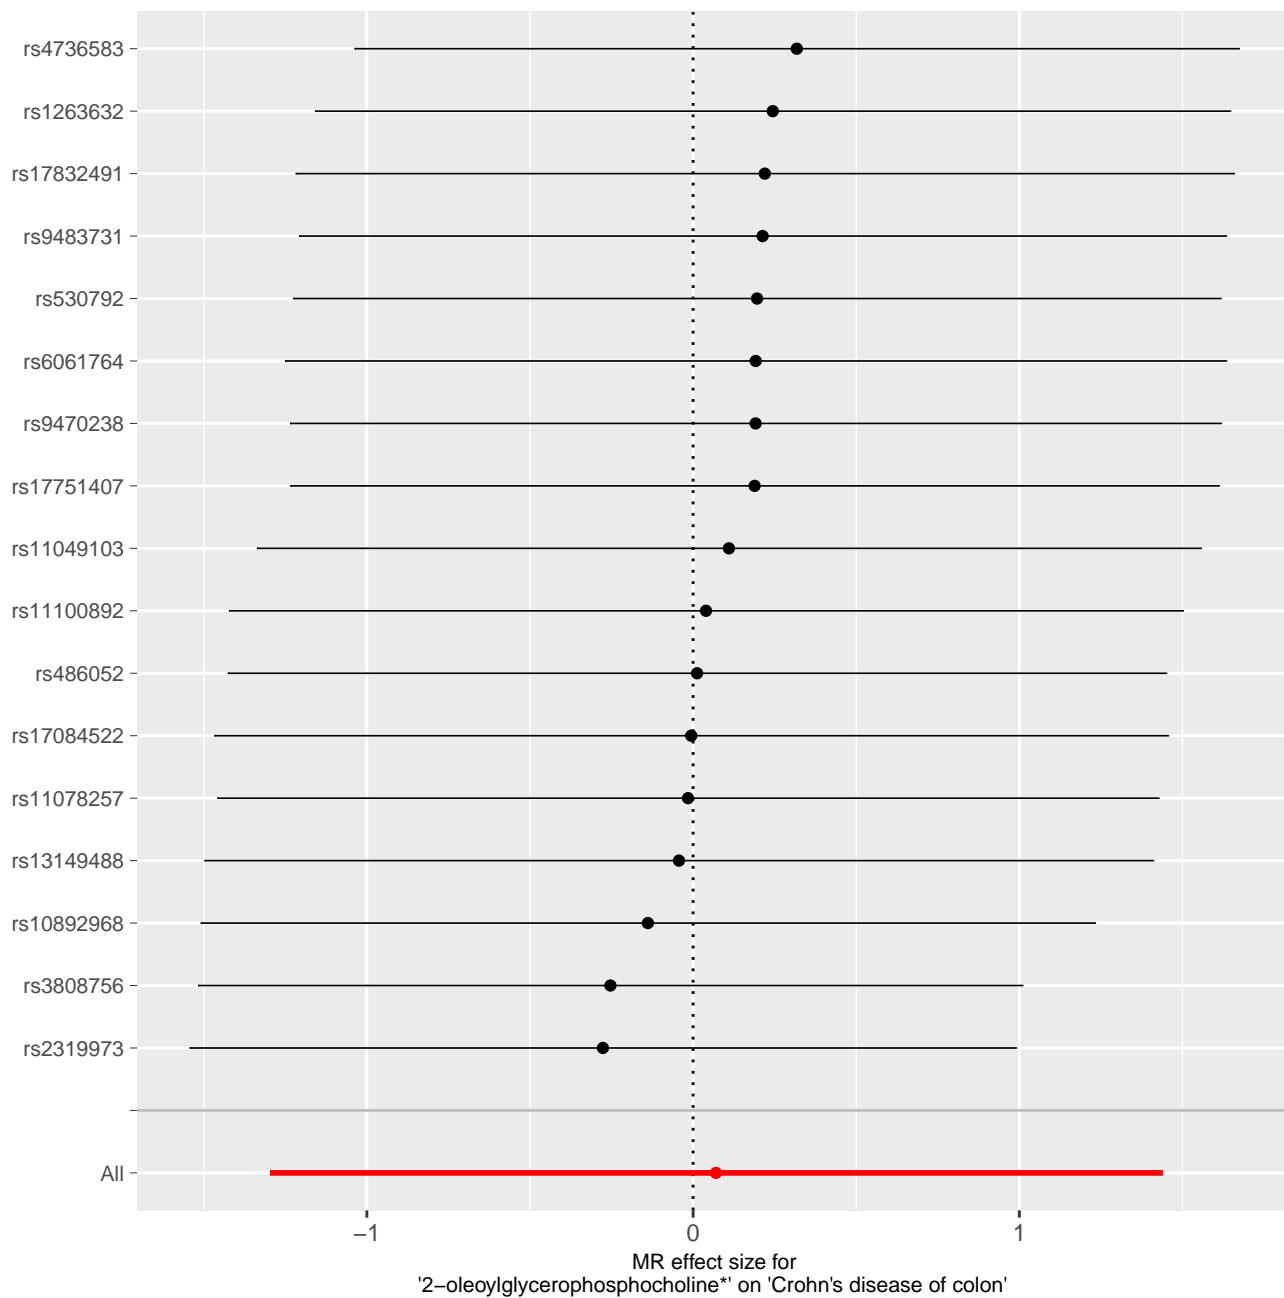

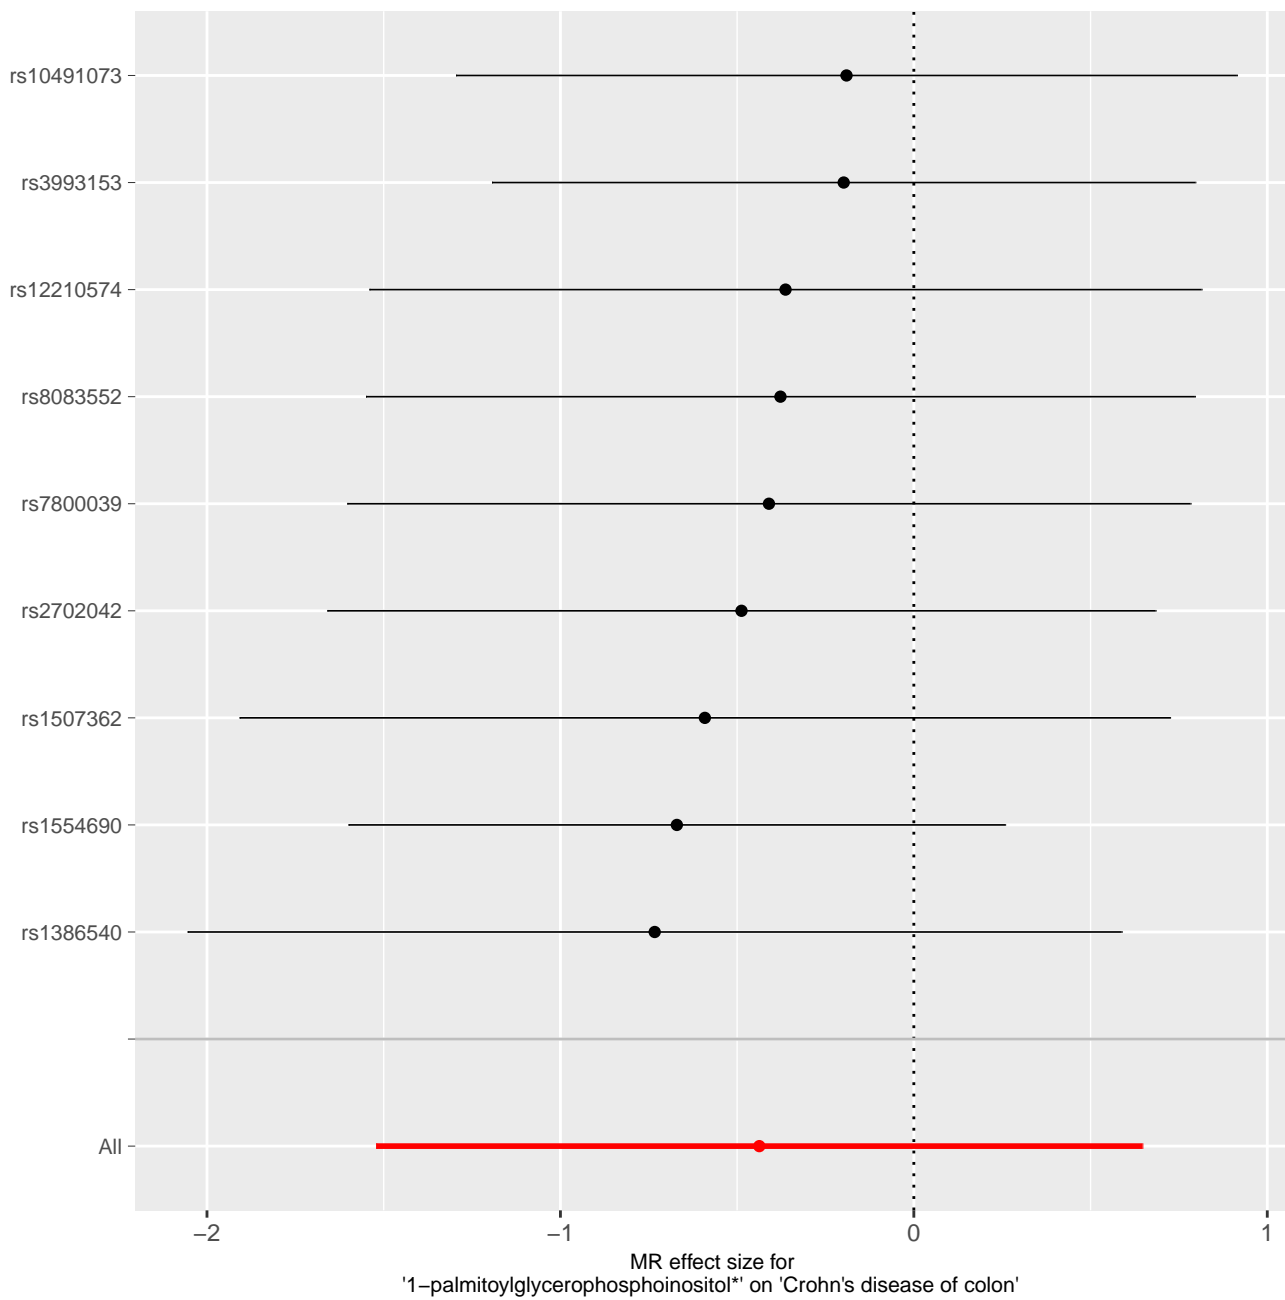

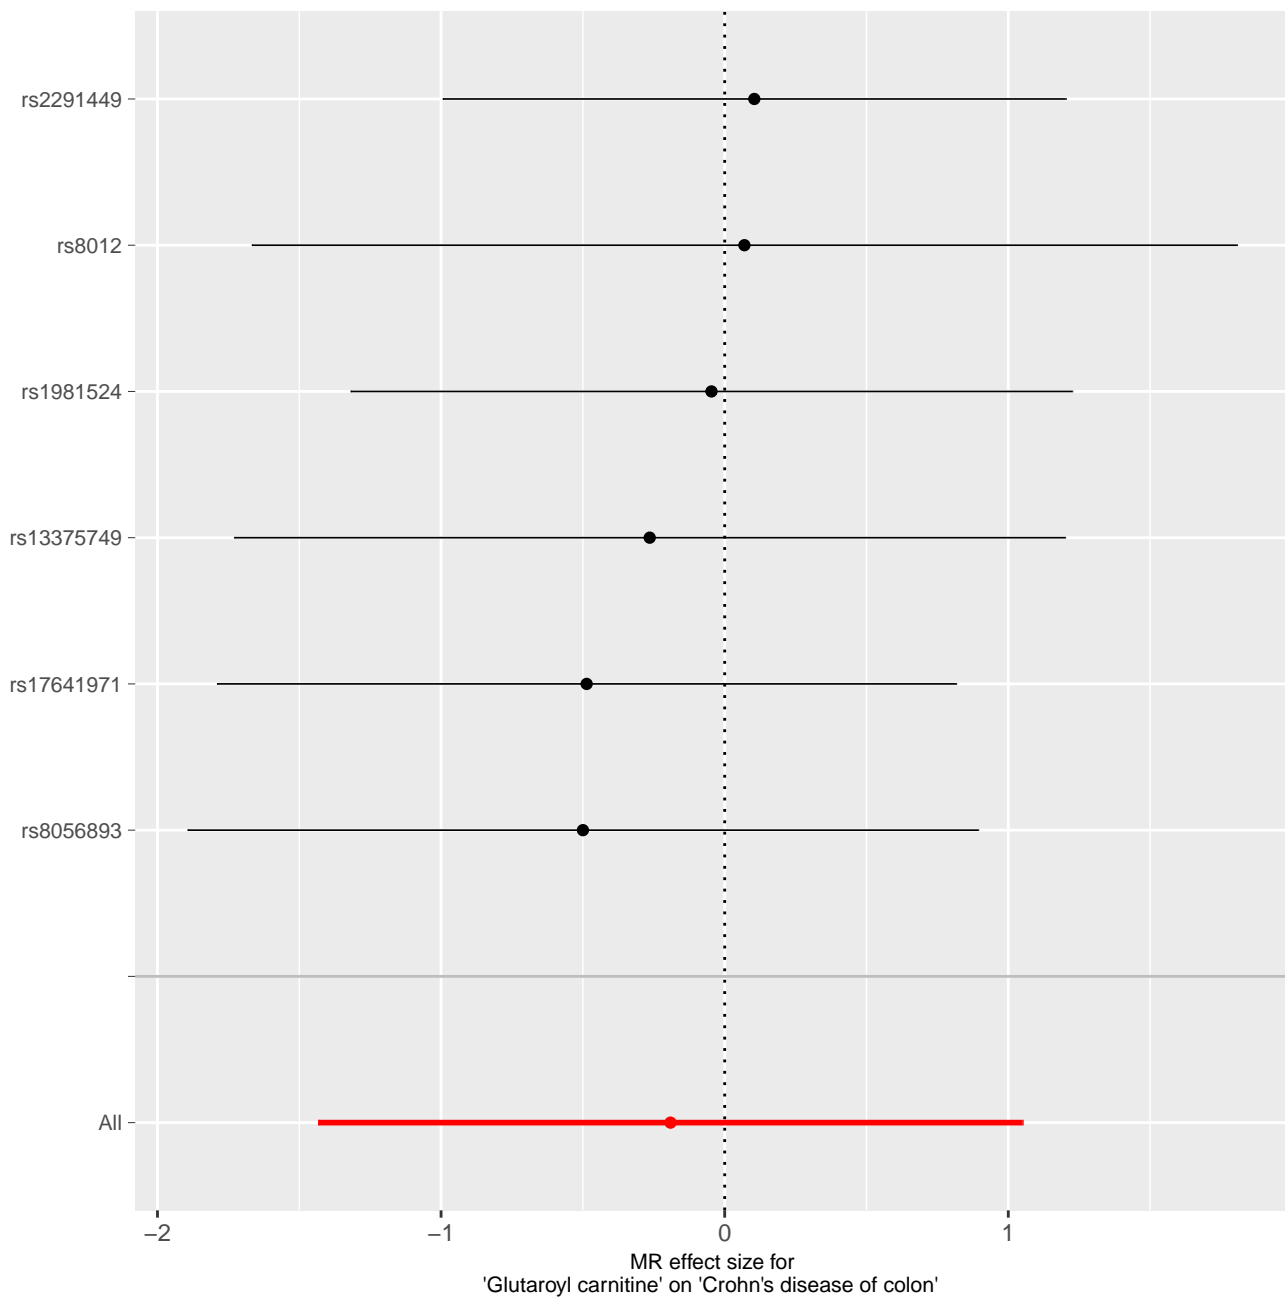

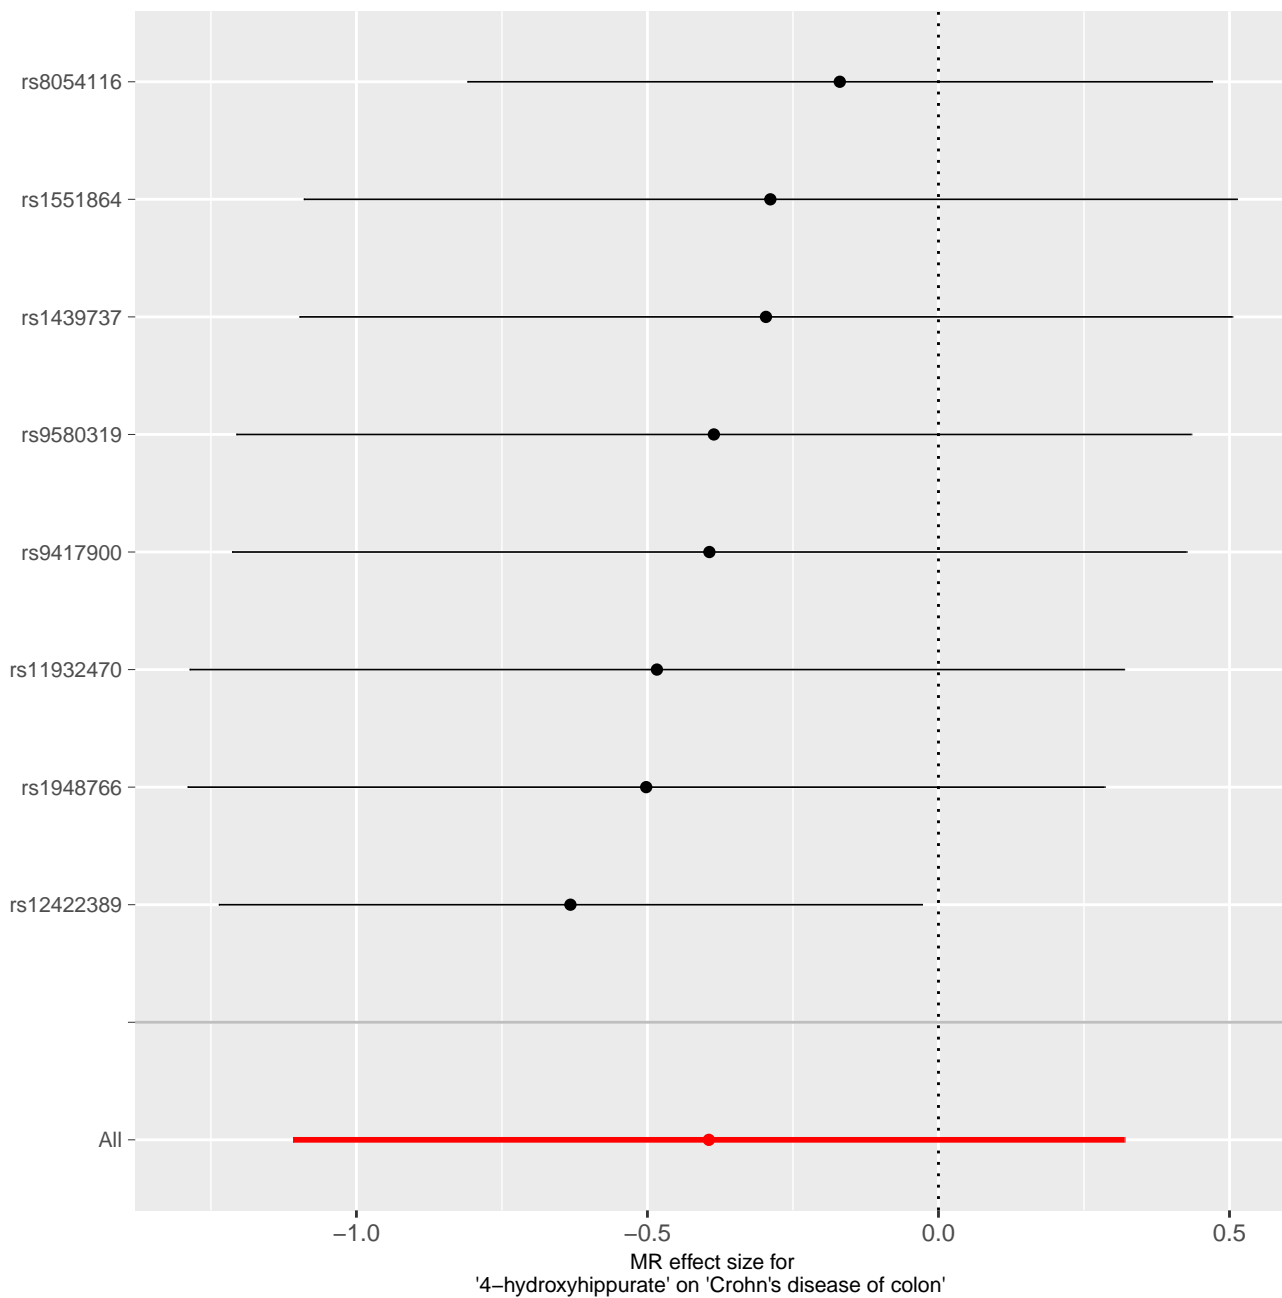



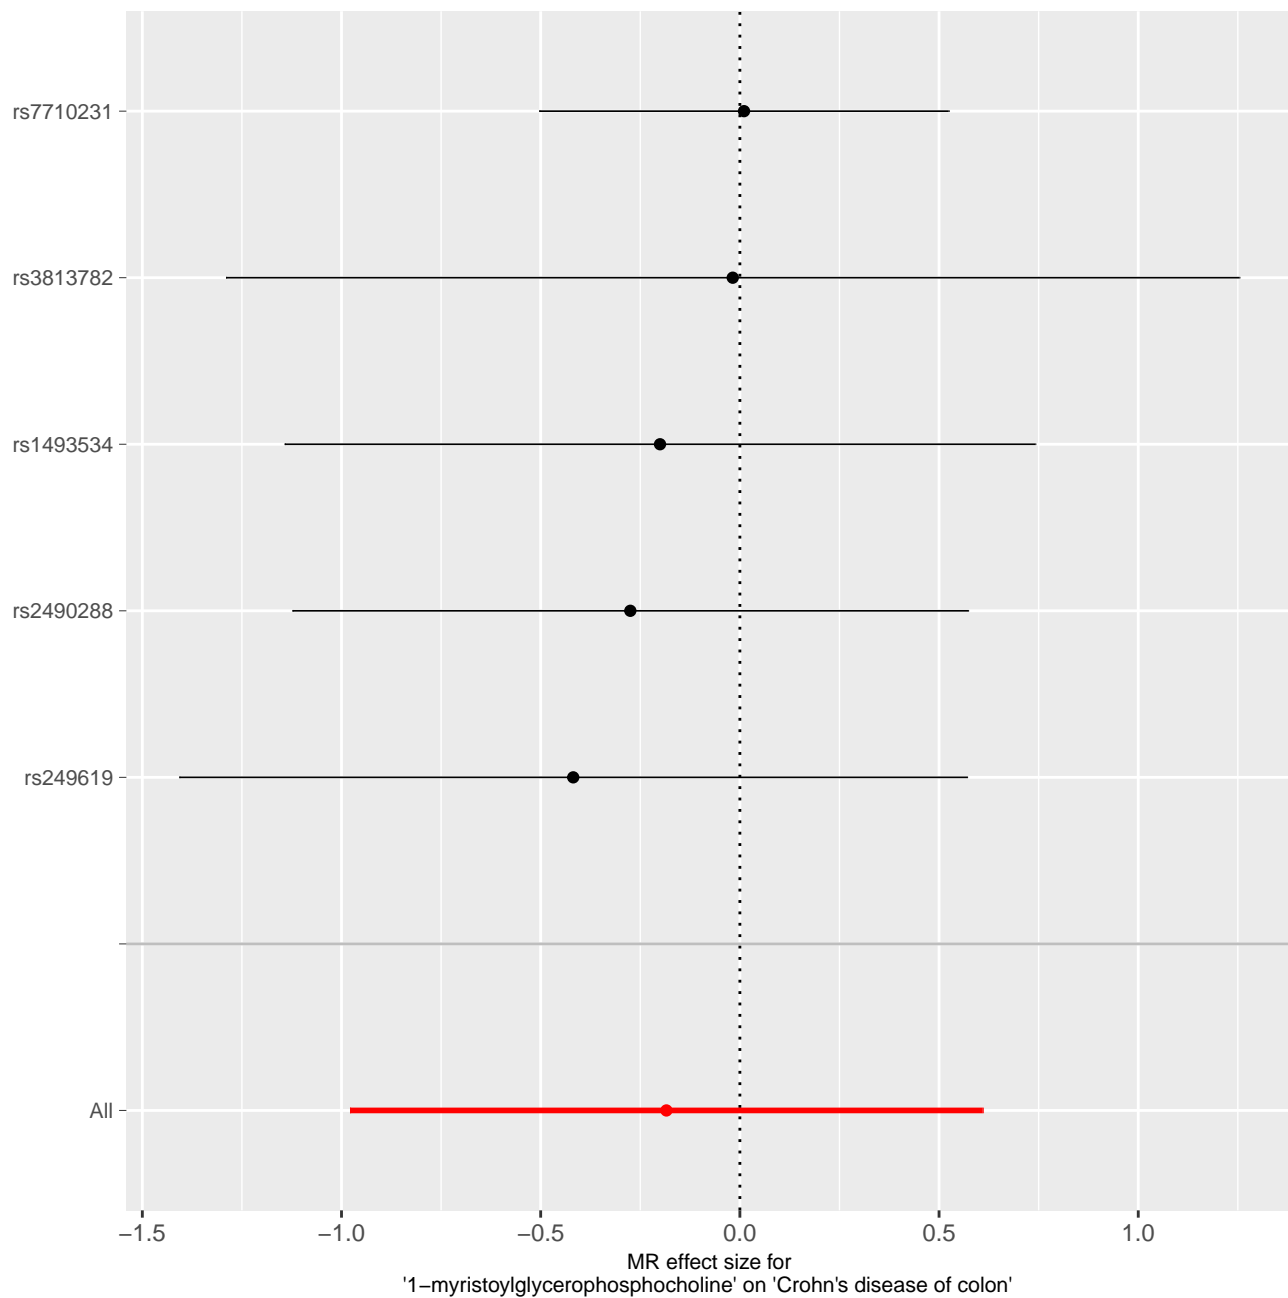

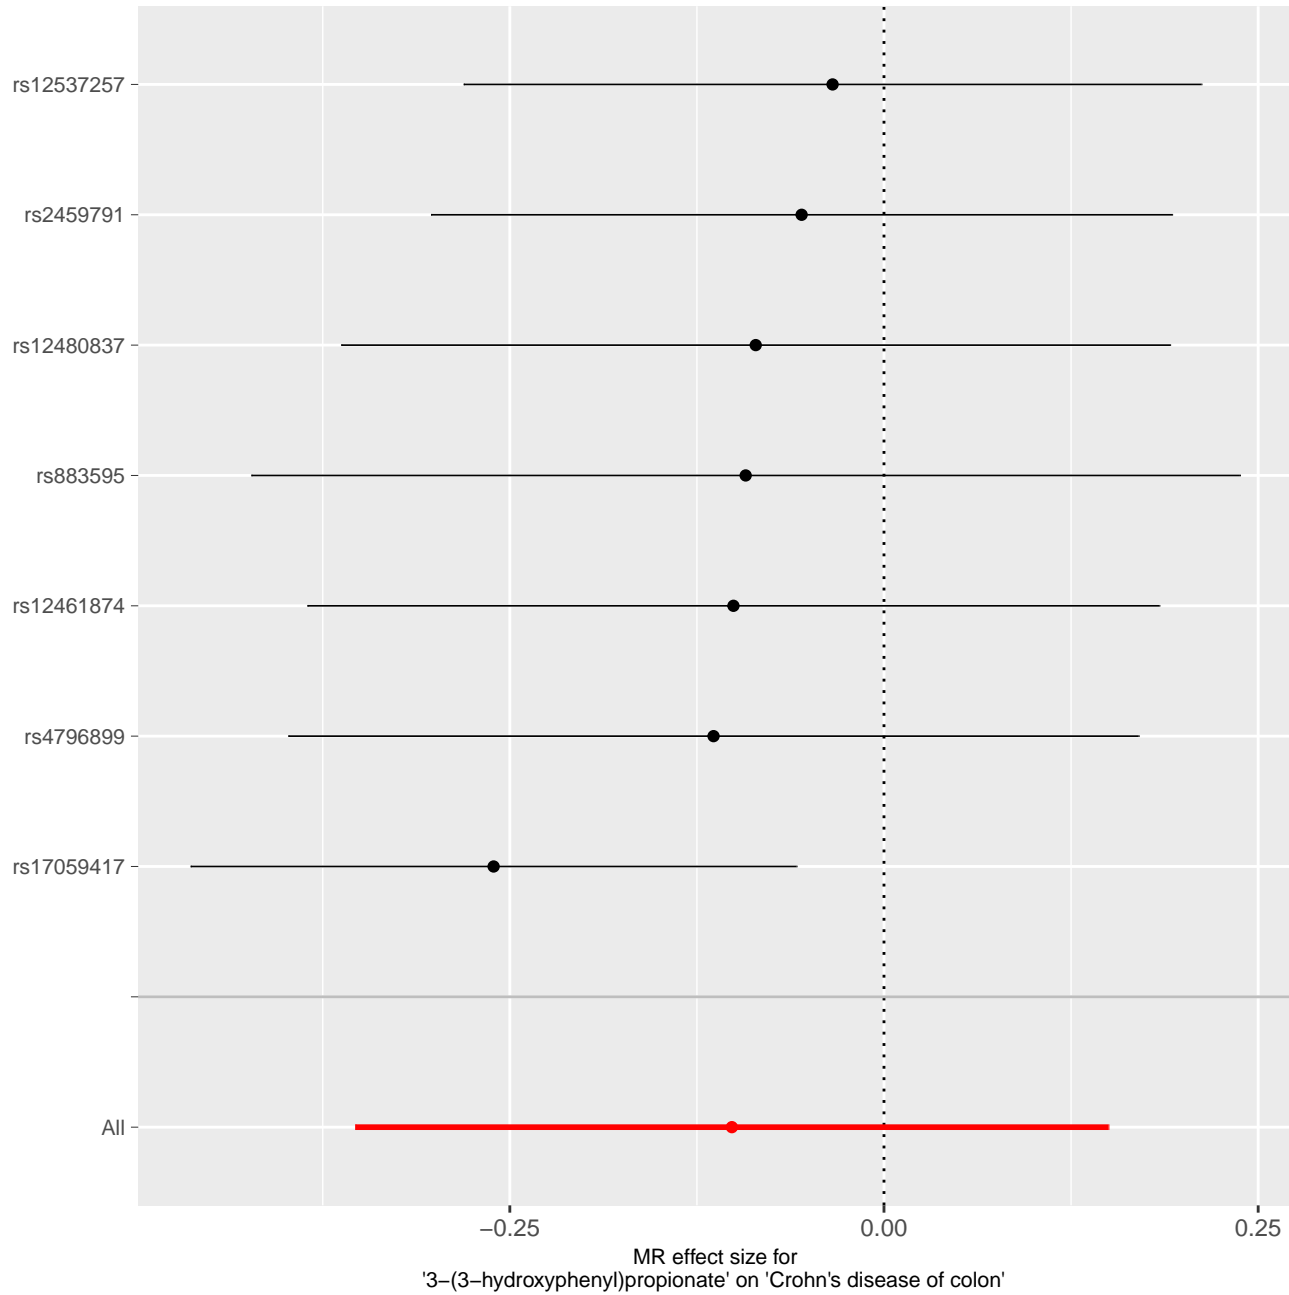

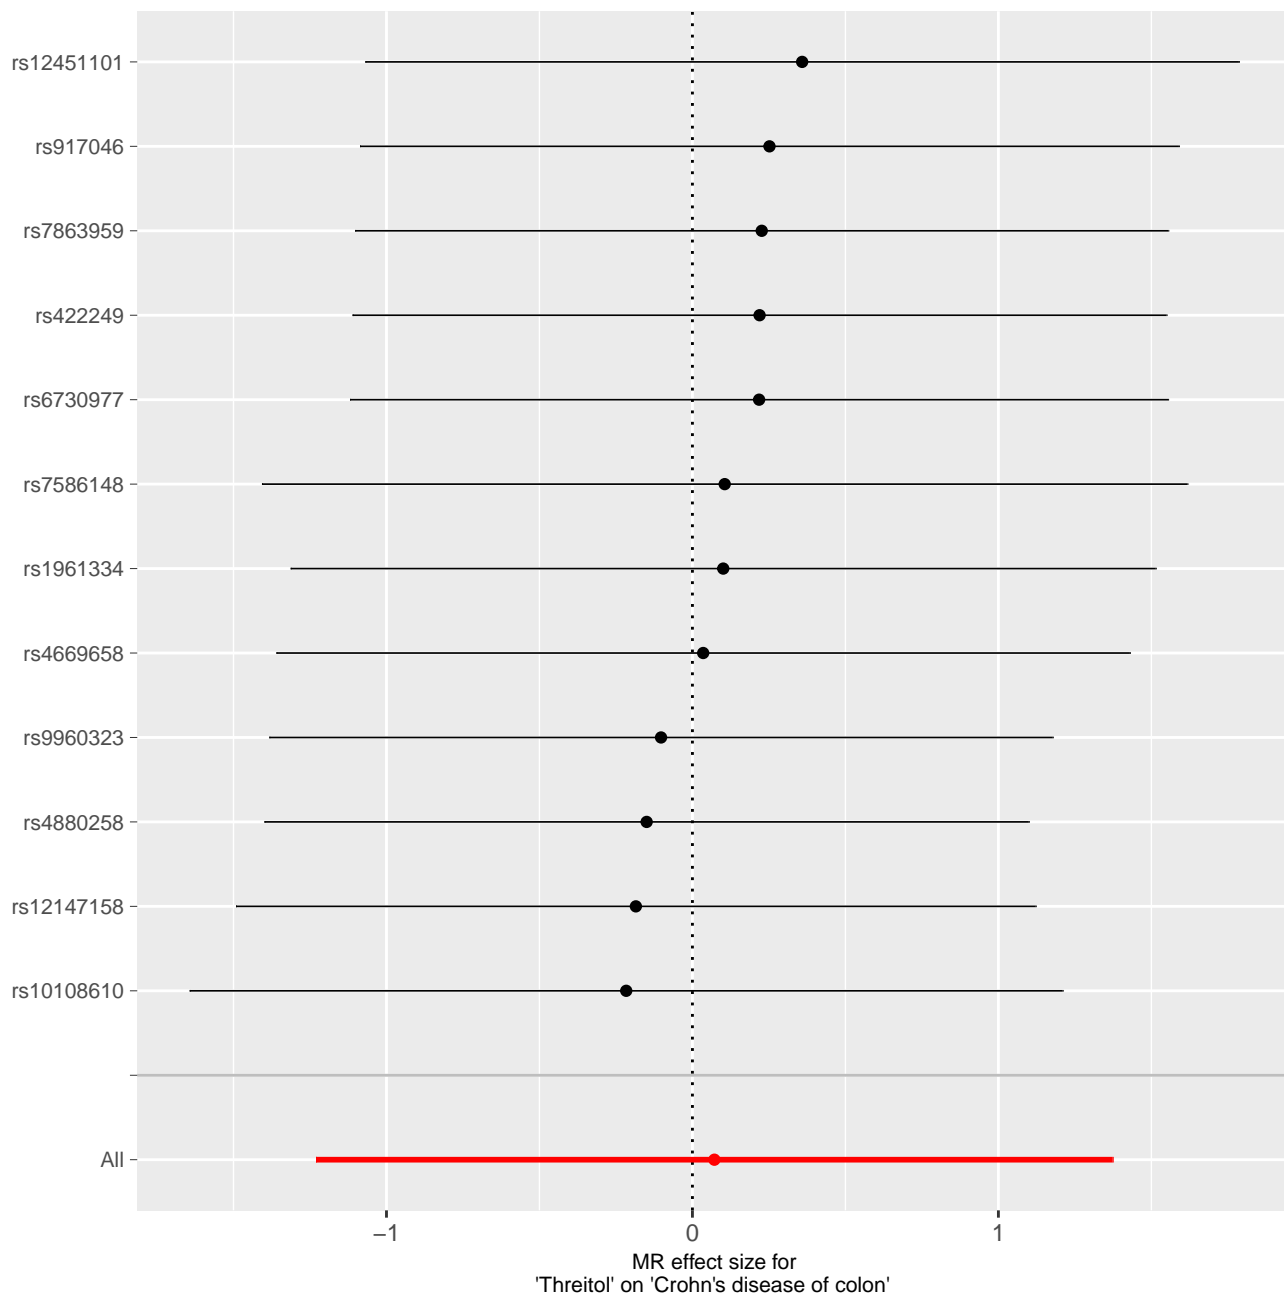

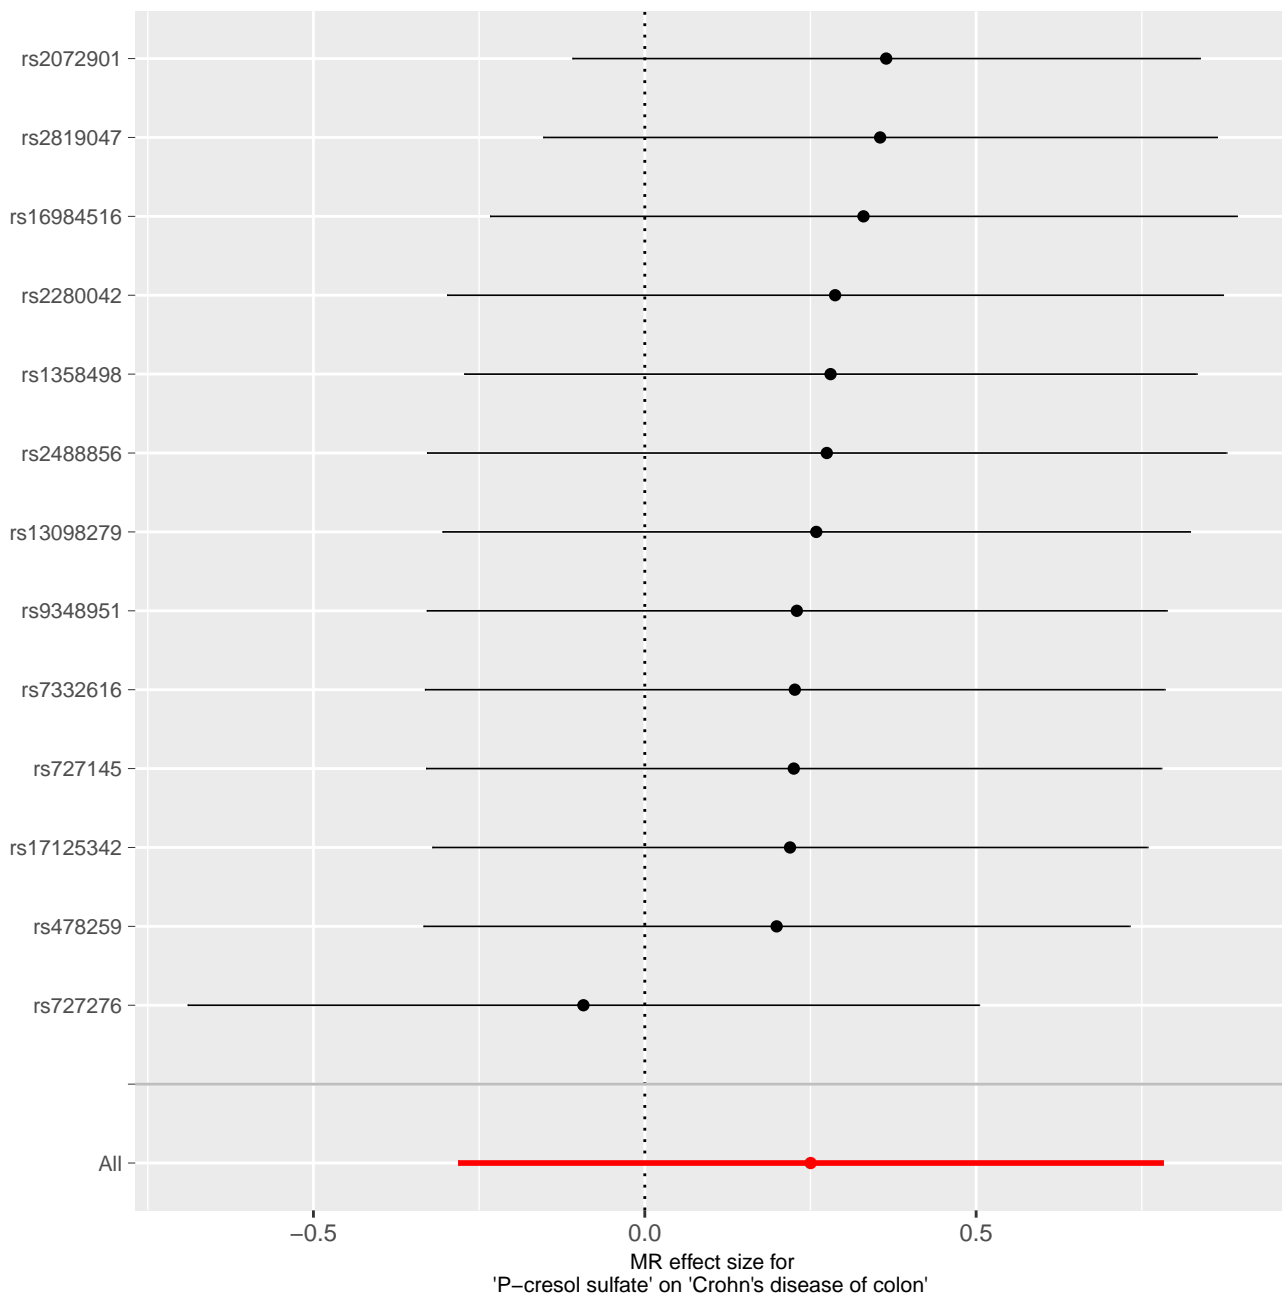

rs1893285

rs2874702

rs1192458

rs7021014

All

0.0

0.5

1.0

MR effect size for  
'X-14450--phenylalanylleucine' on 'Crohn's disease of colon'

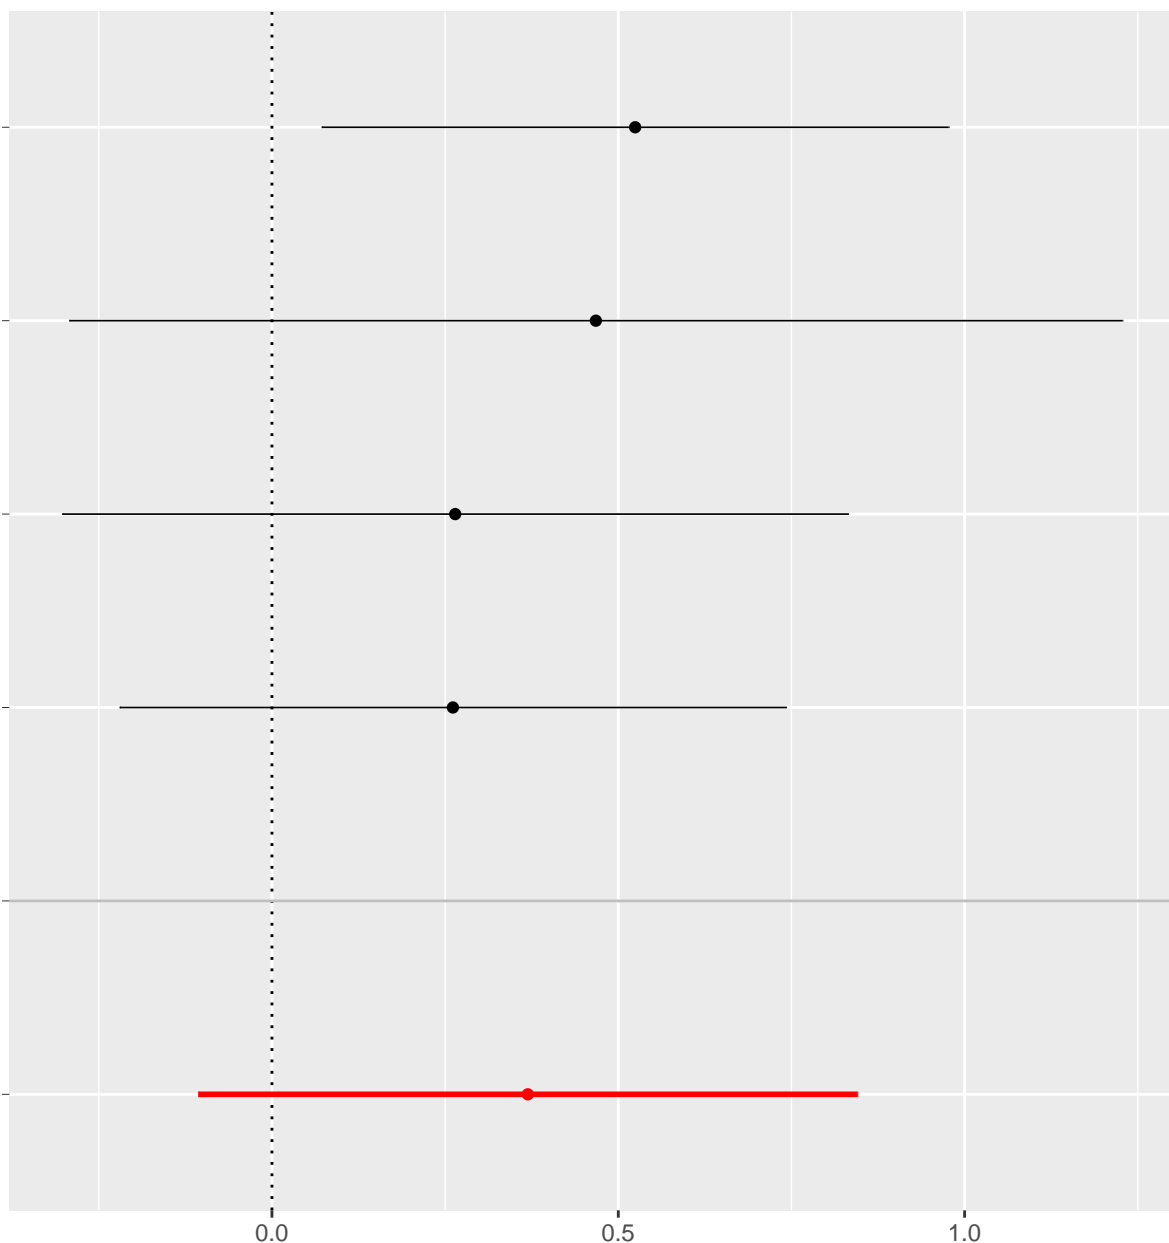

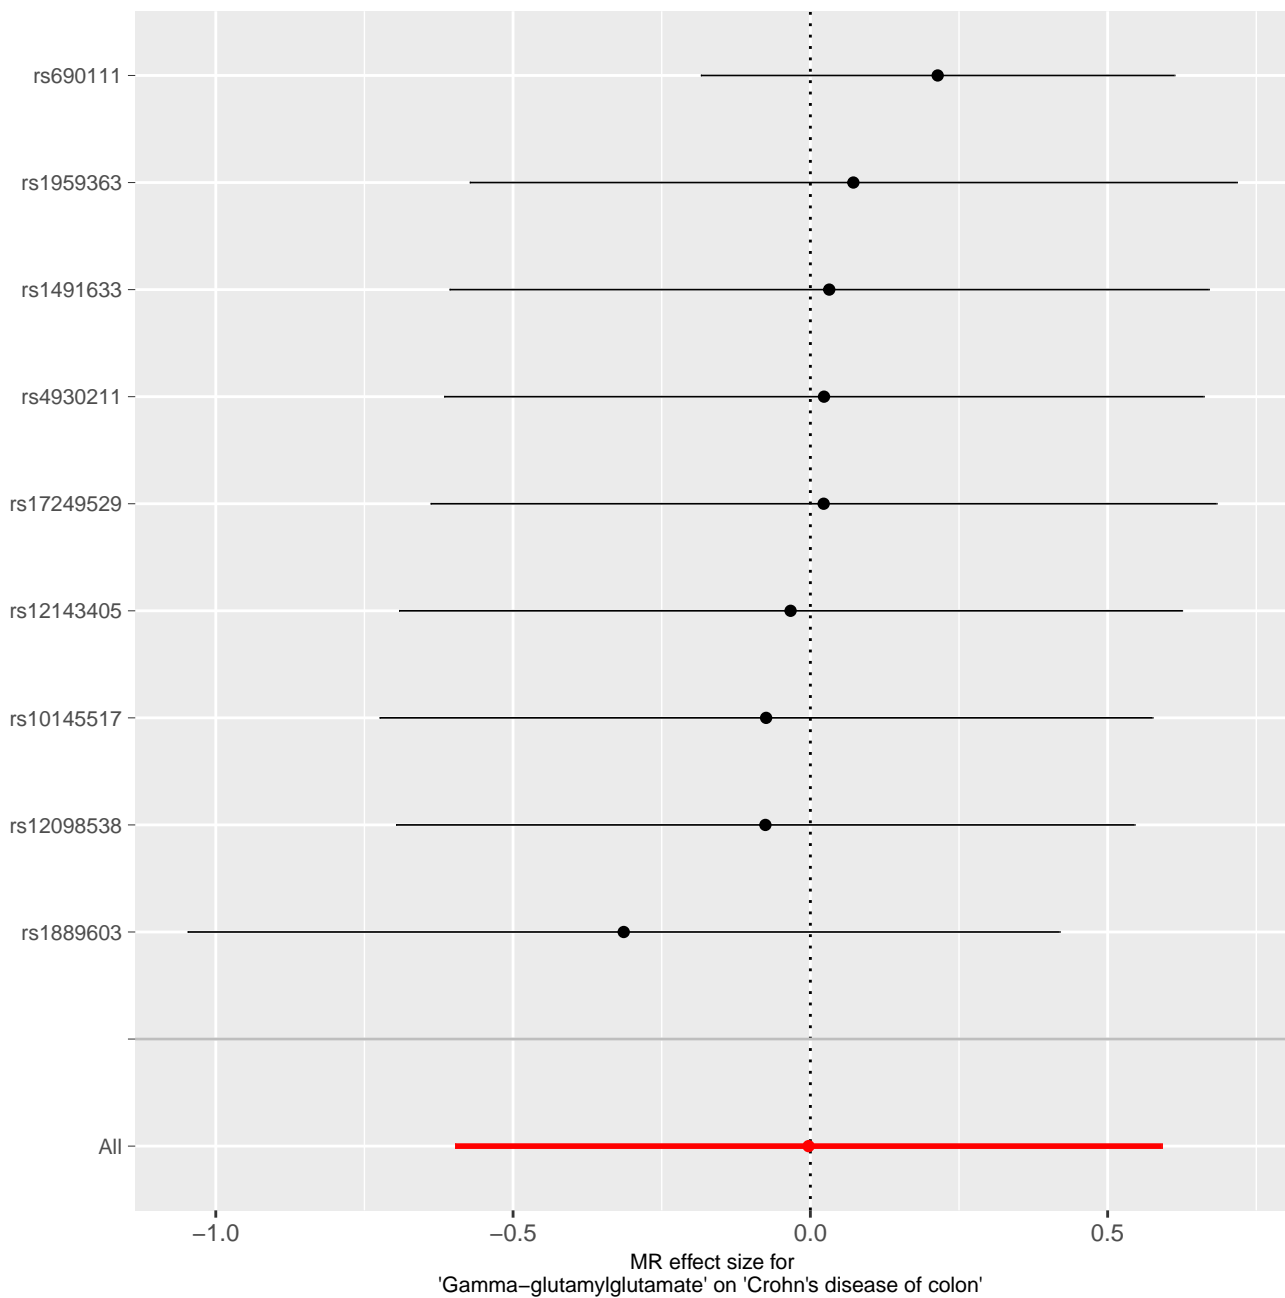

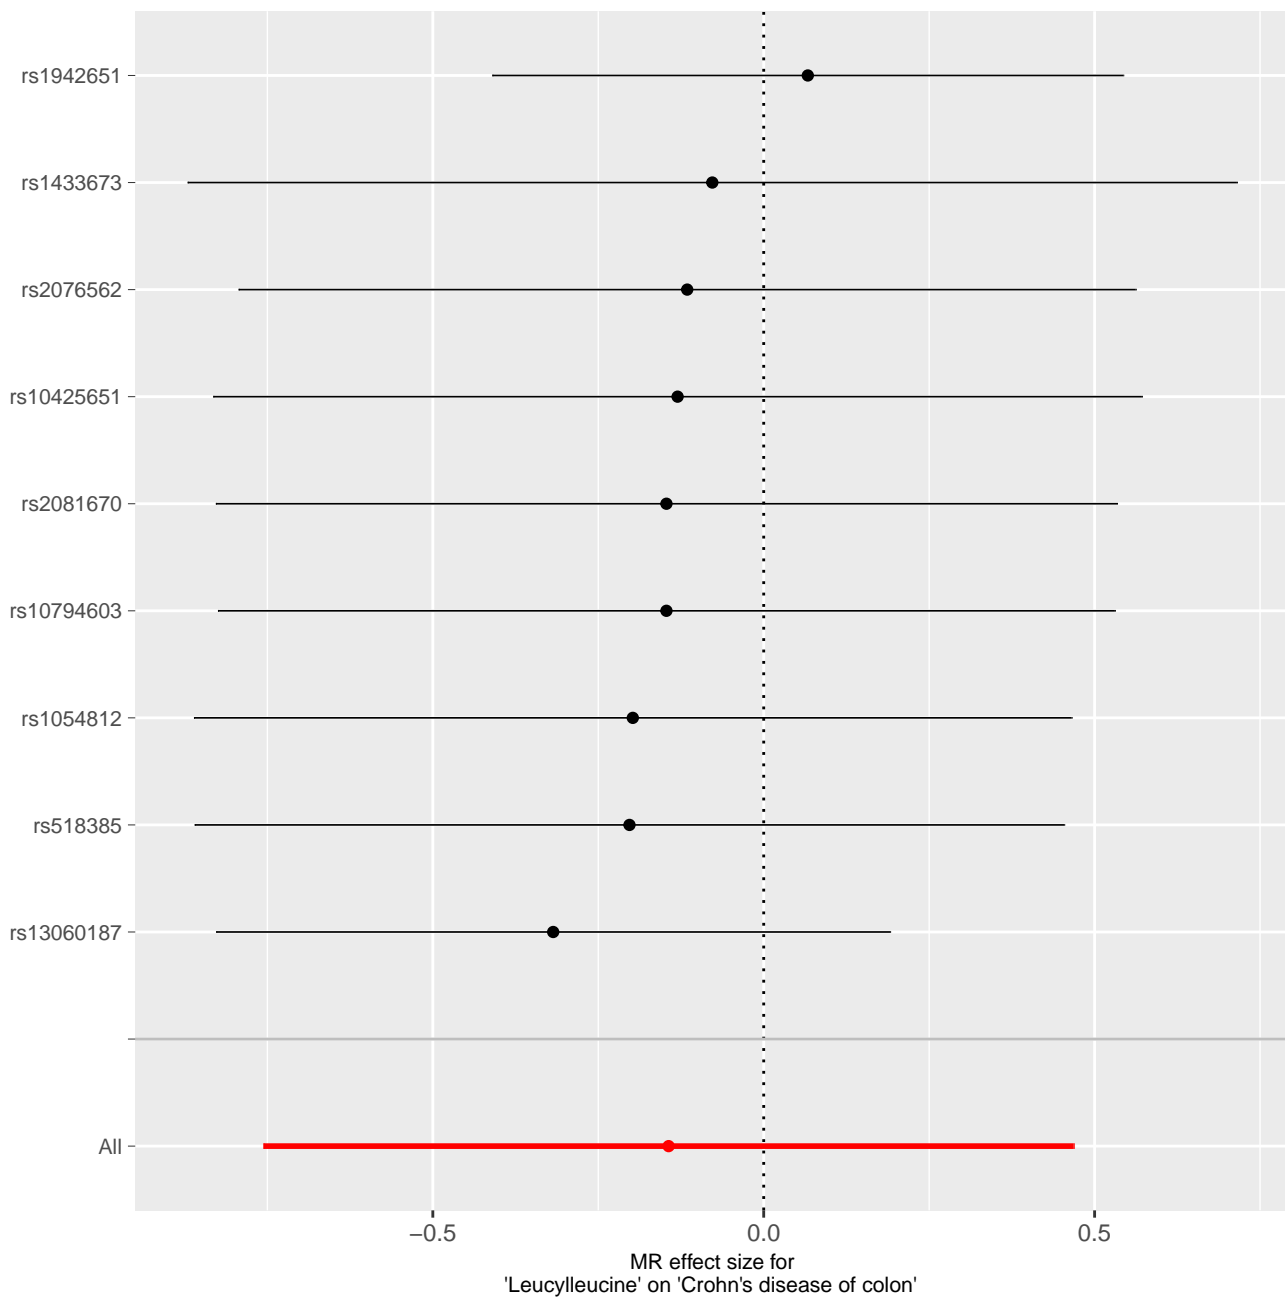

Batch 258 : 7- $\alpha$ -hydroxy-3-oxo-4-cholestenoate (7-Hoca) on Crohn's disease of colon

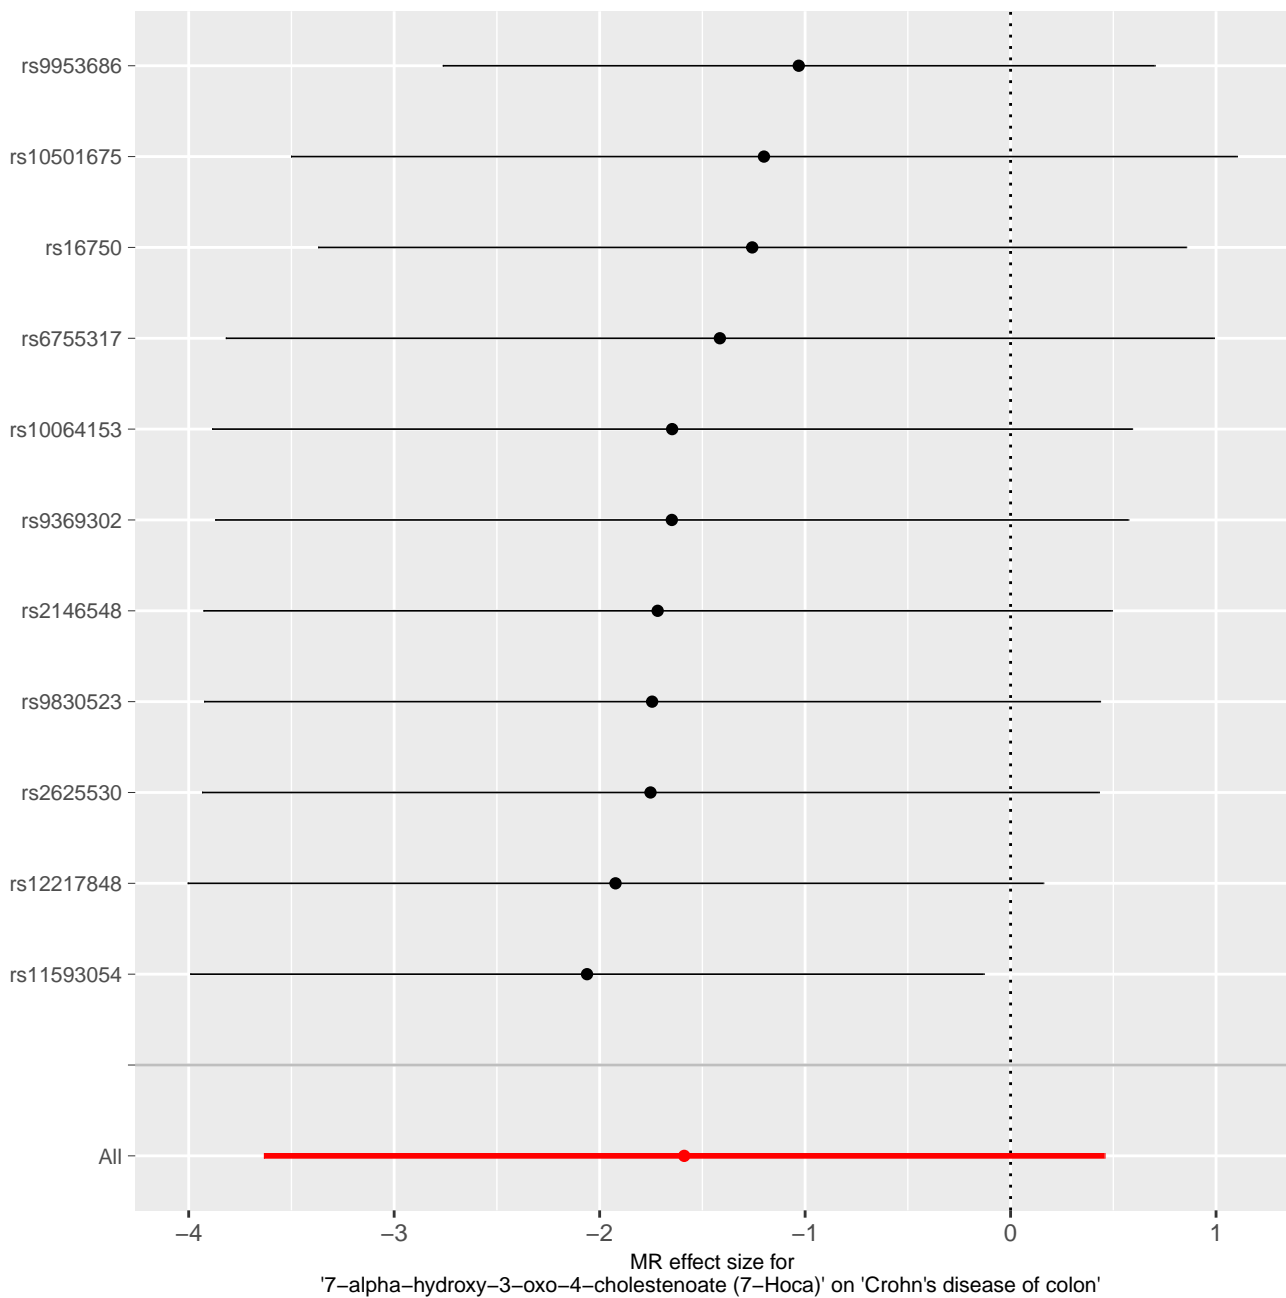



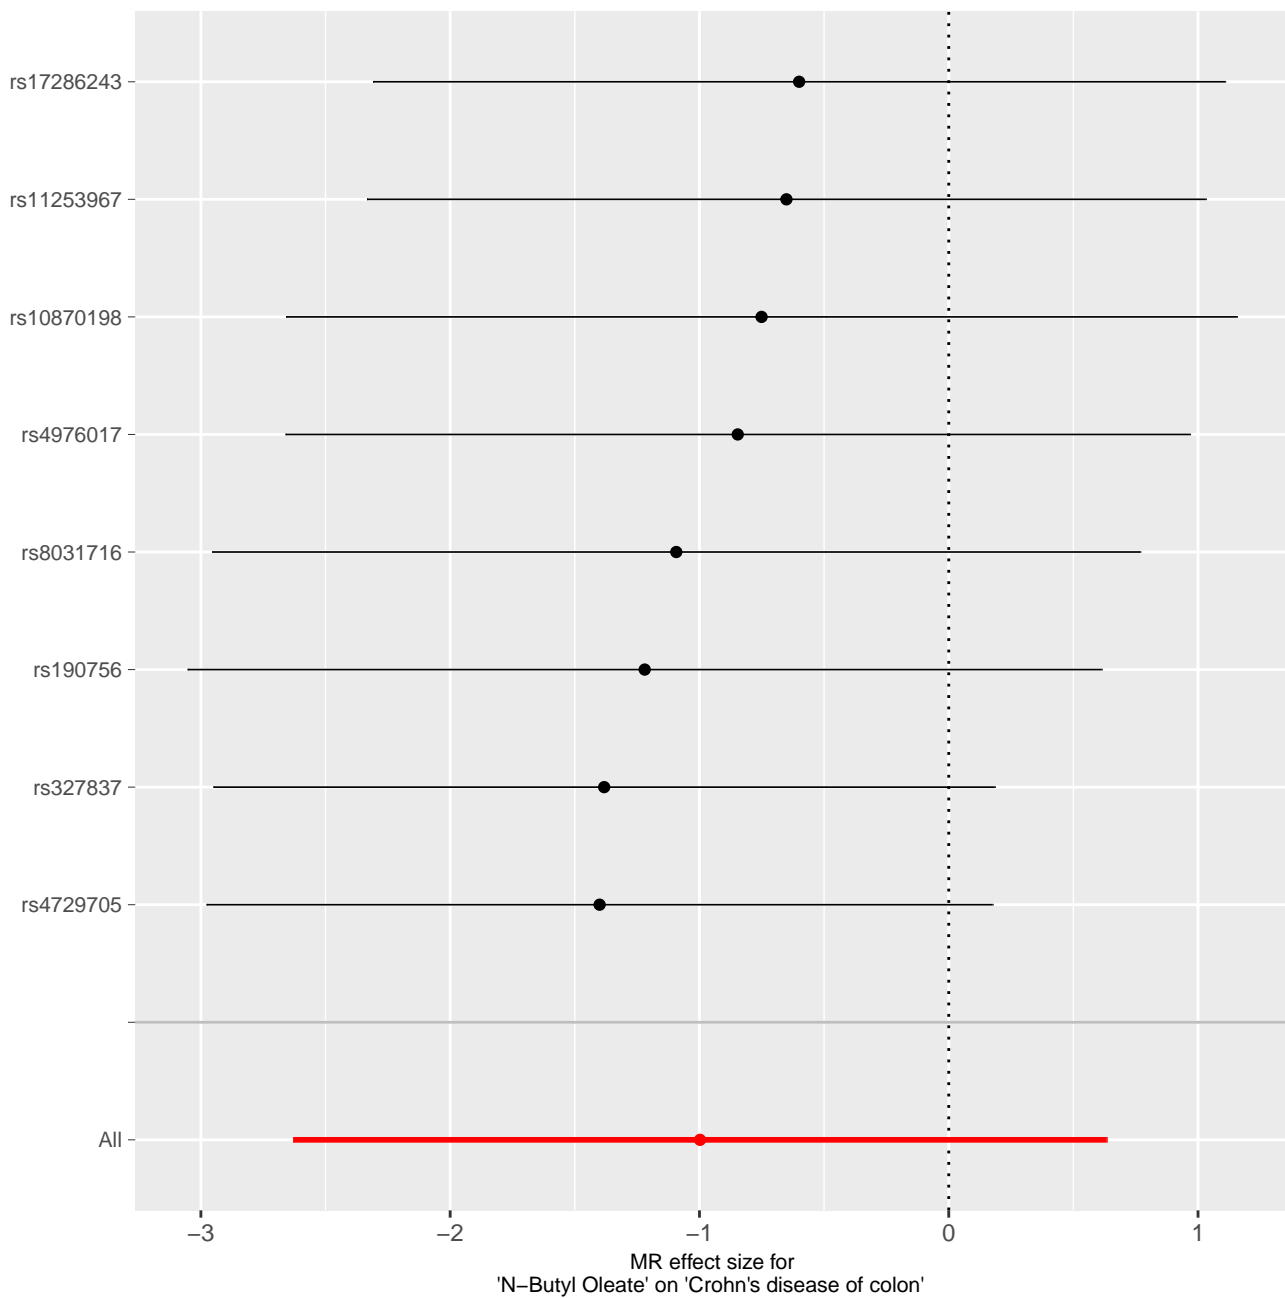

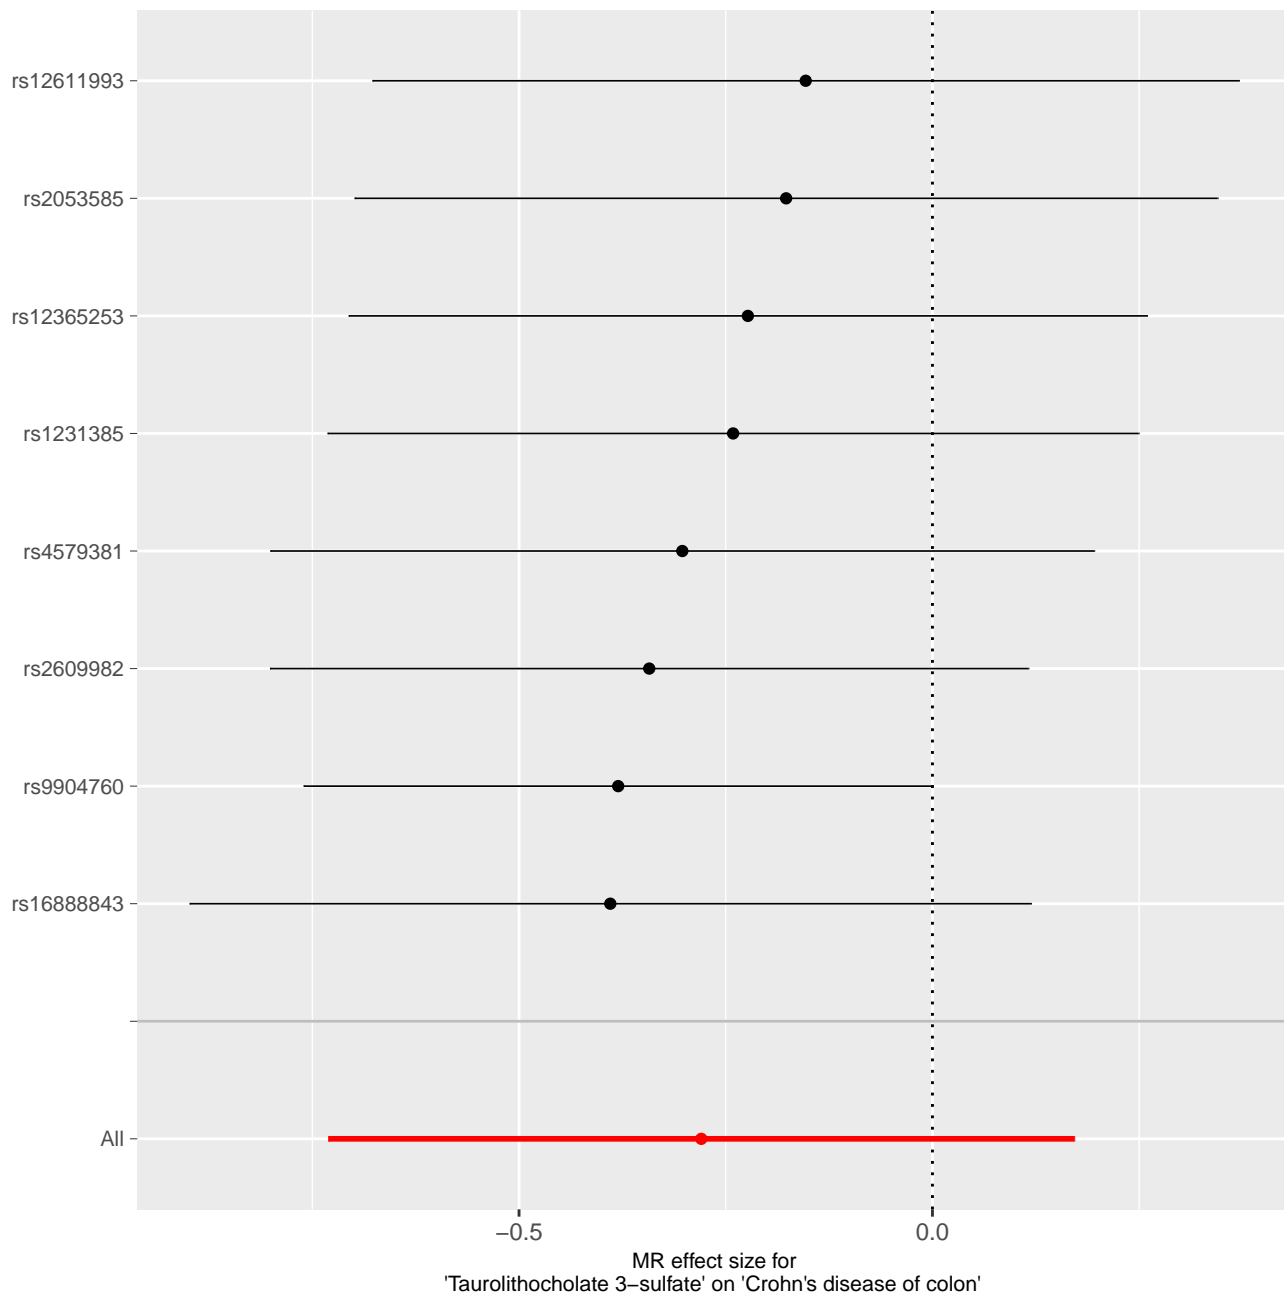

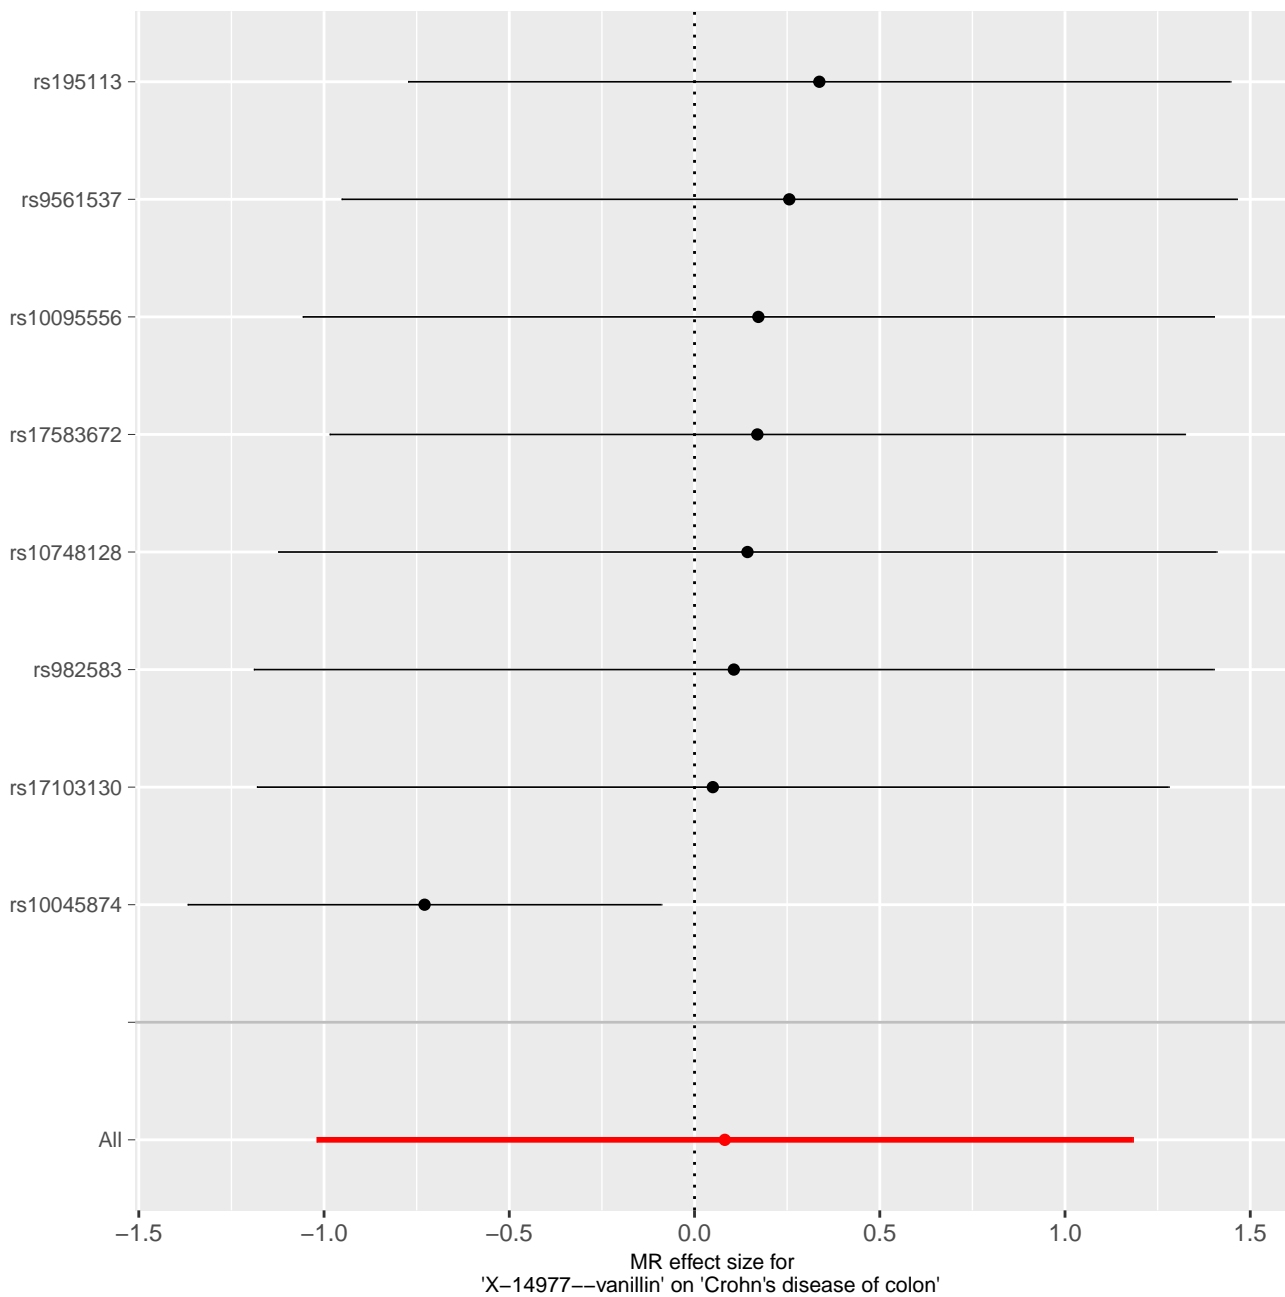

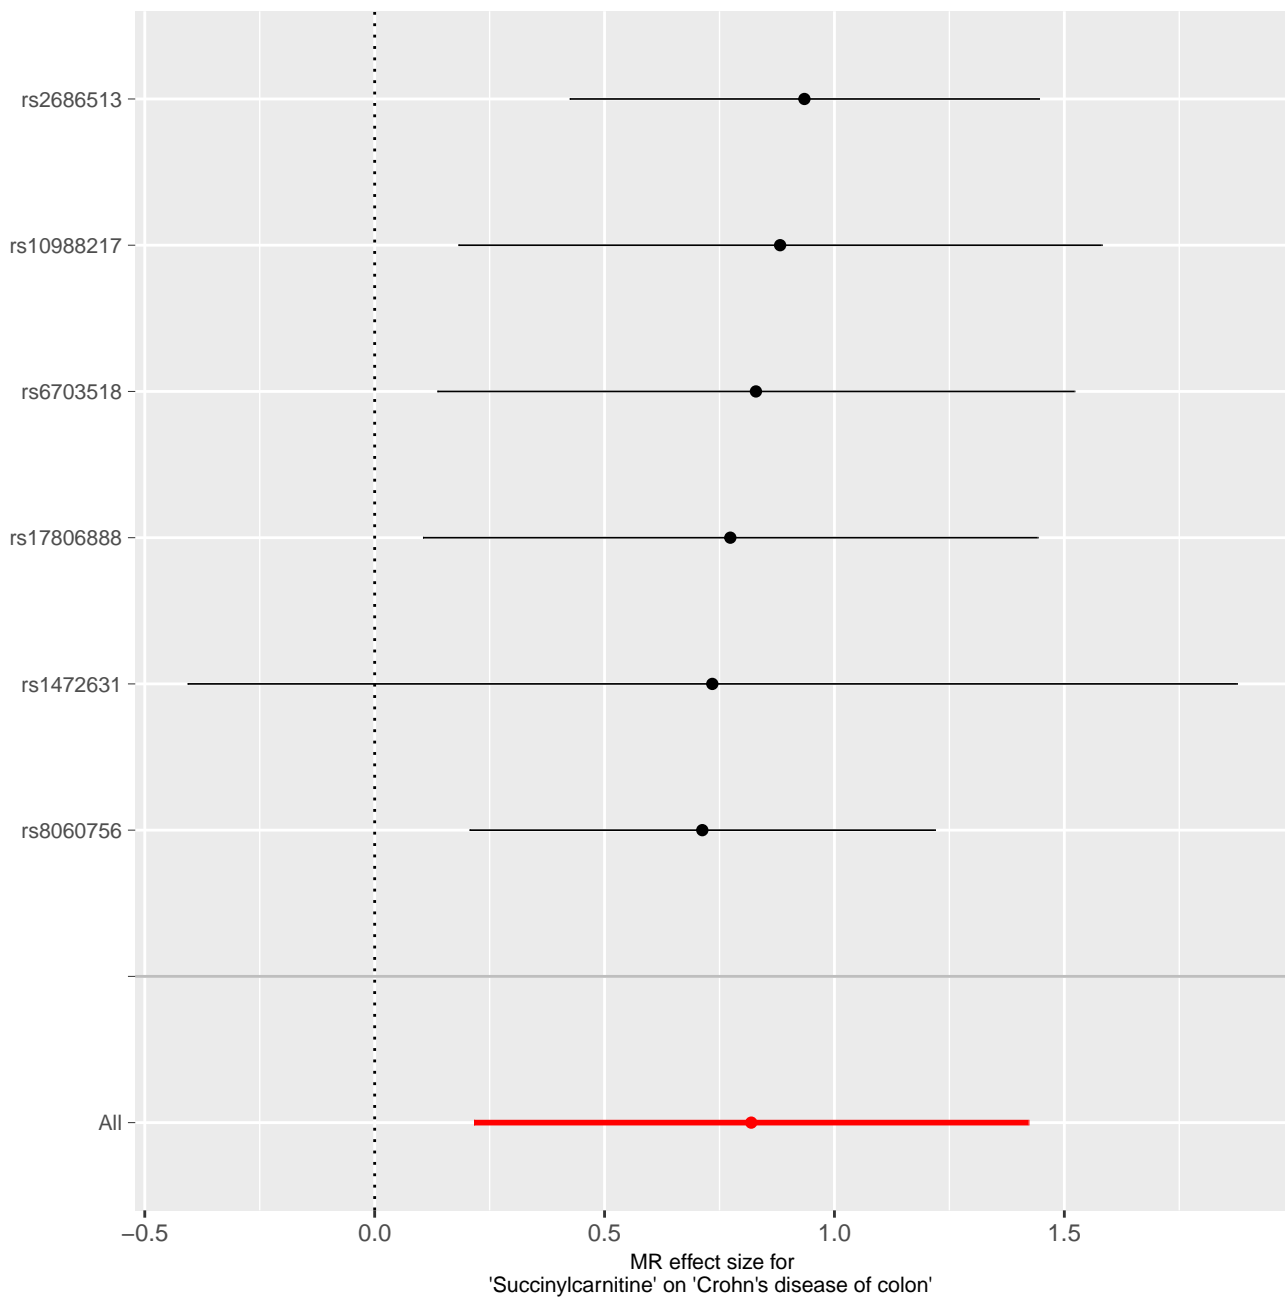

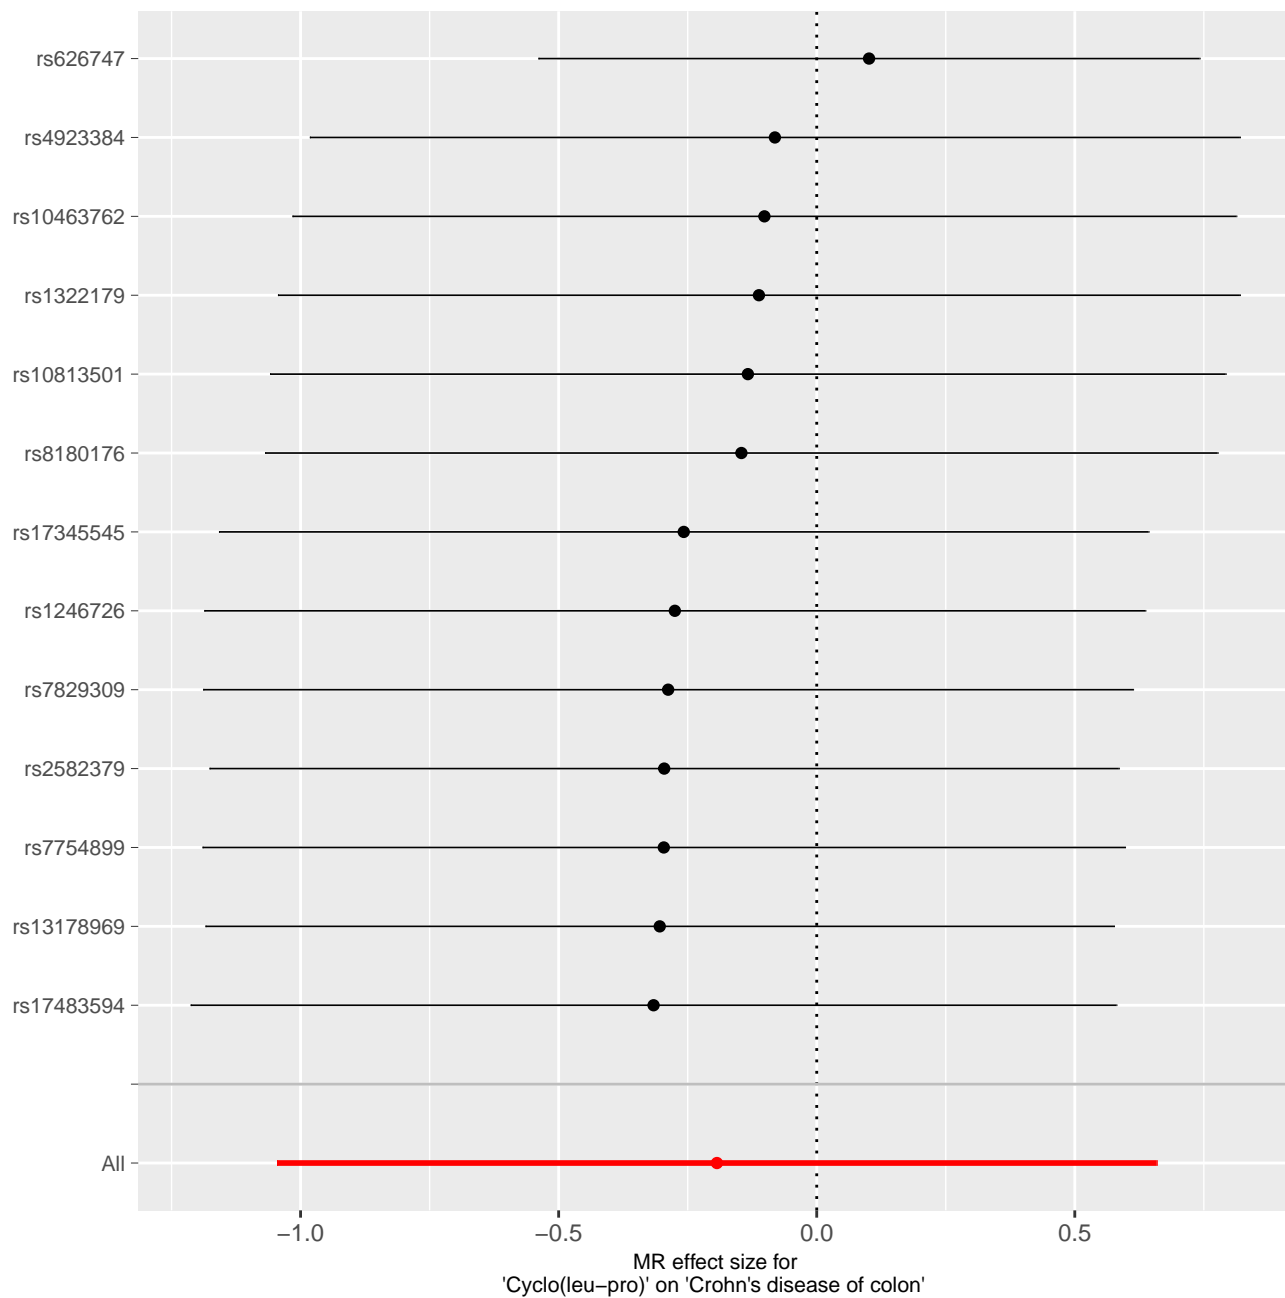

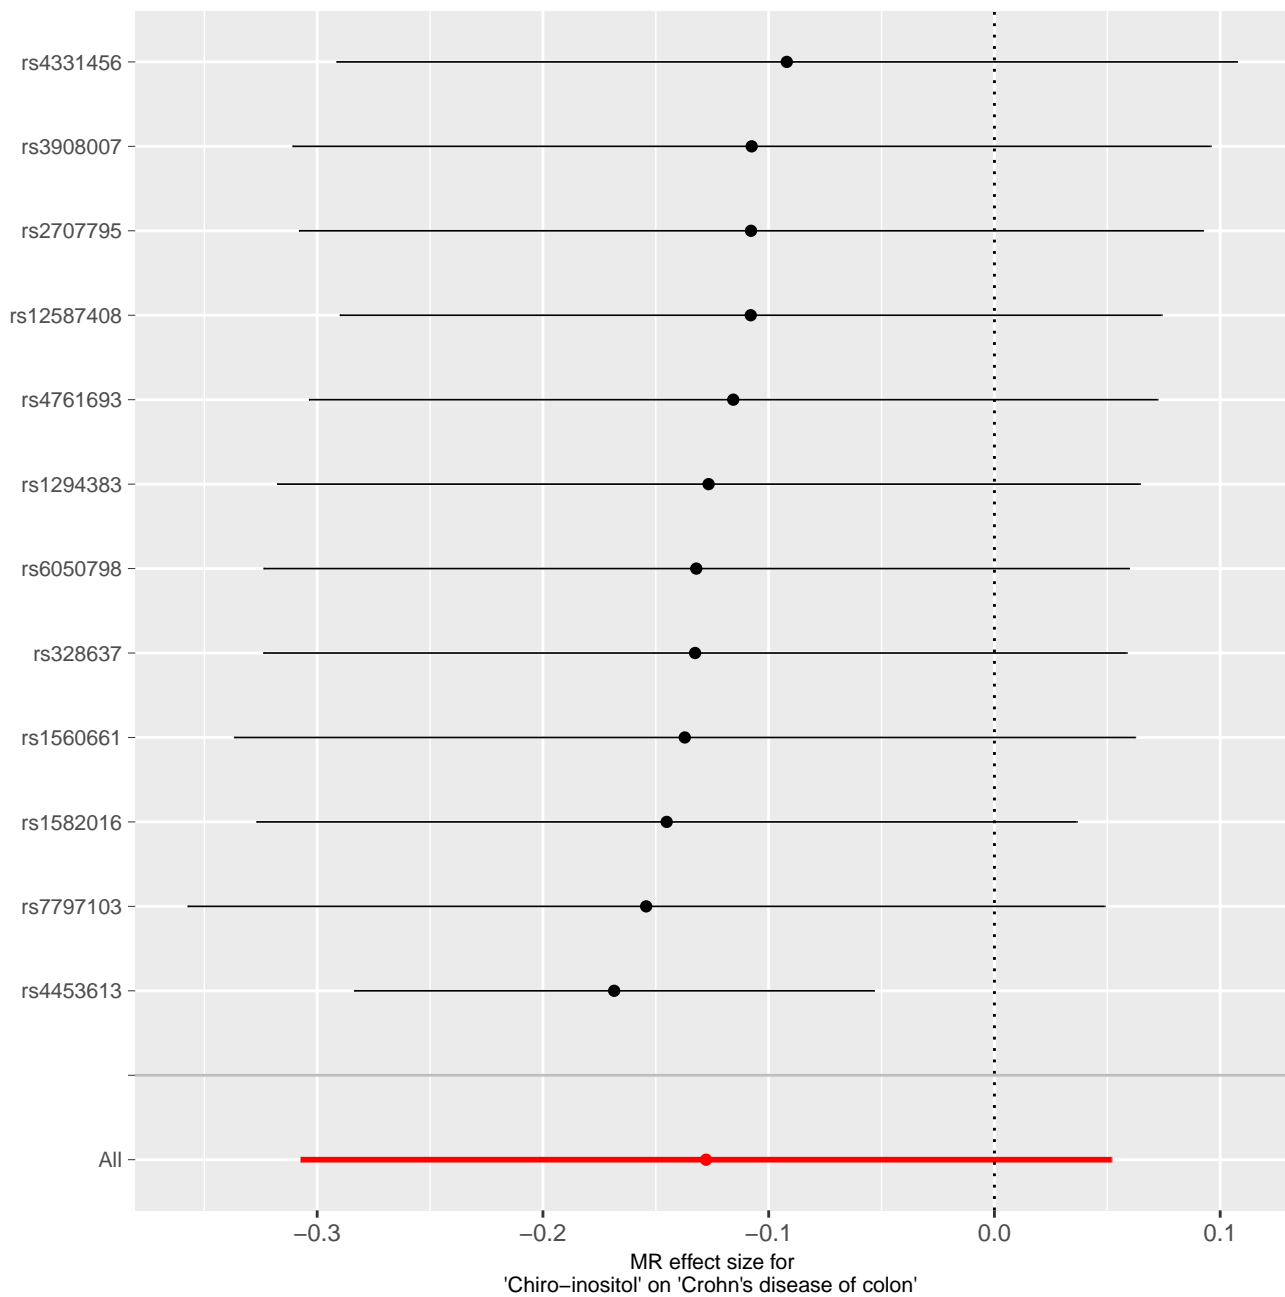

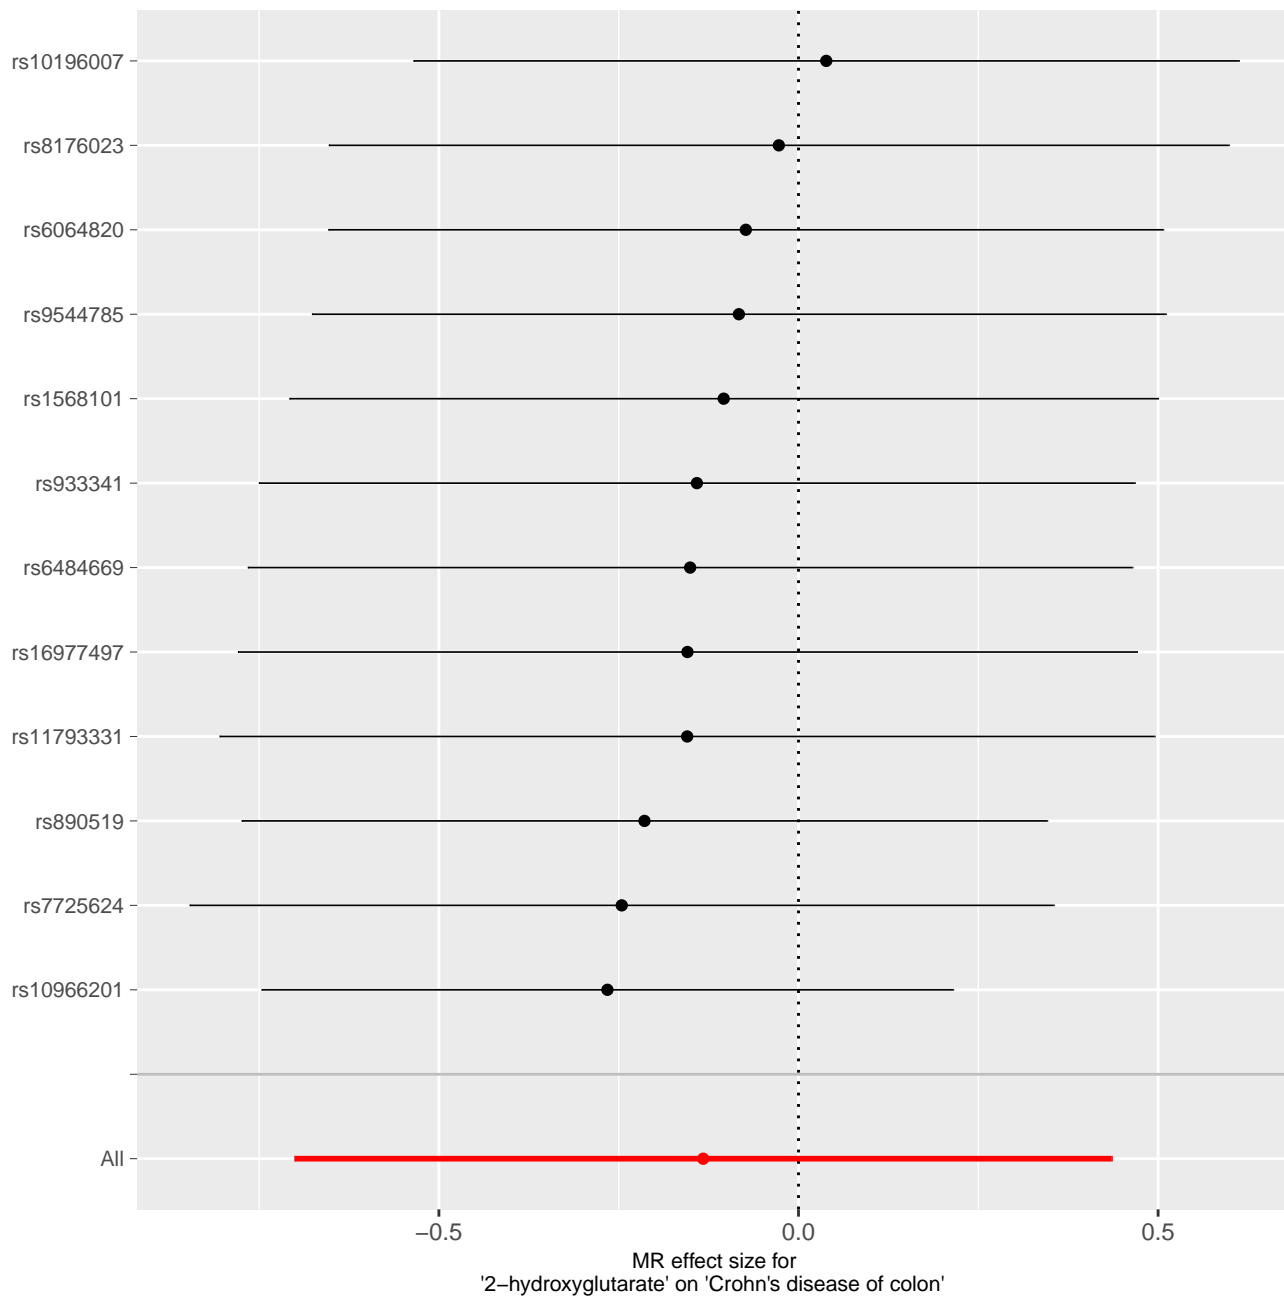

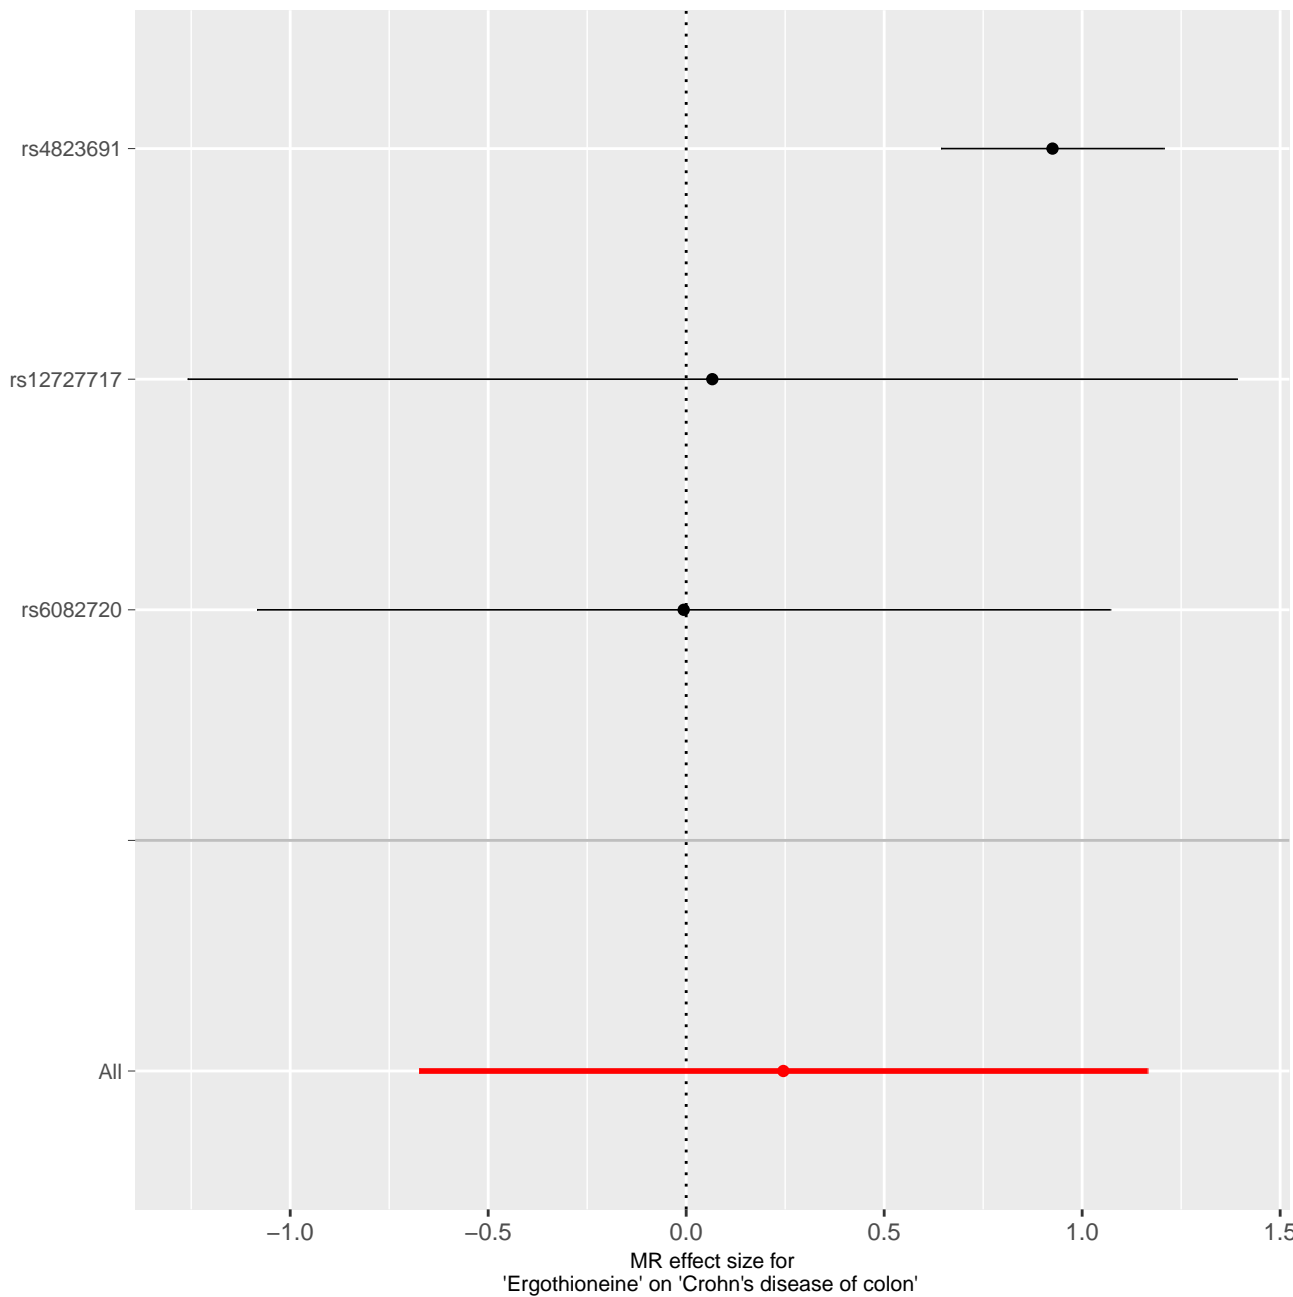



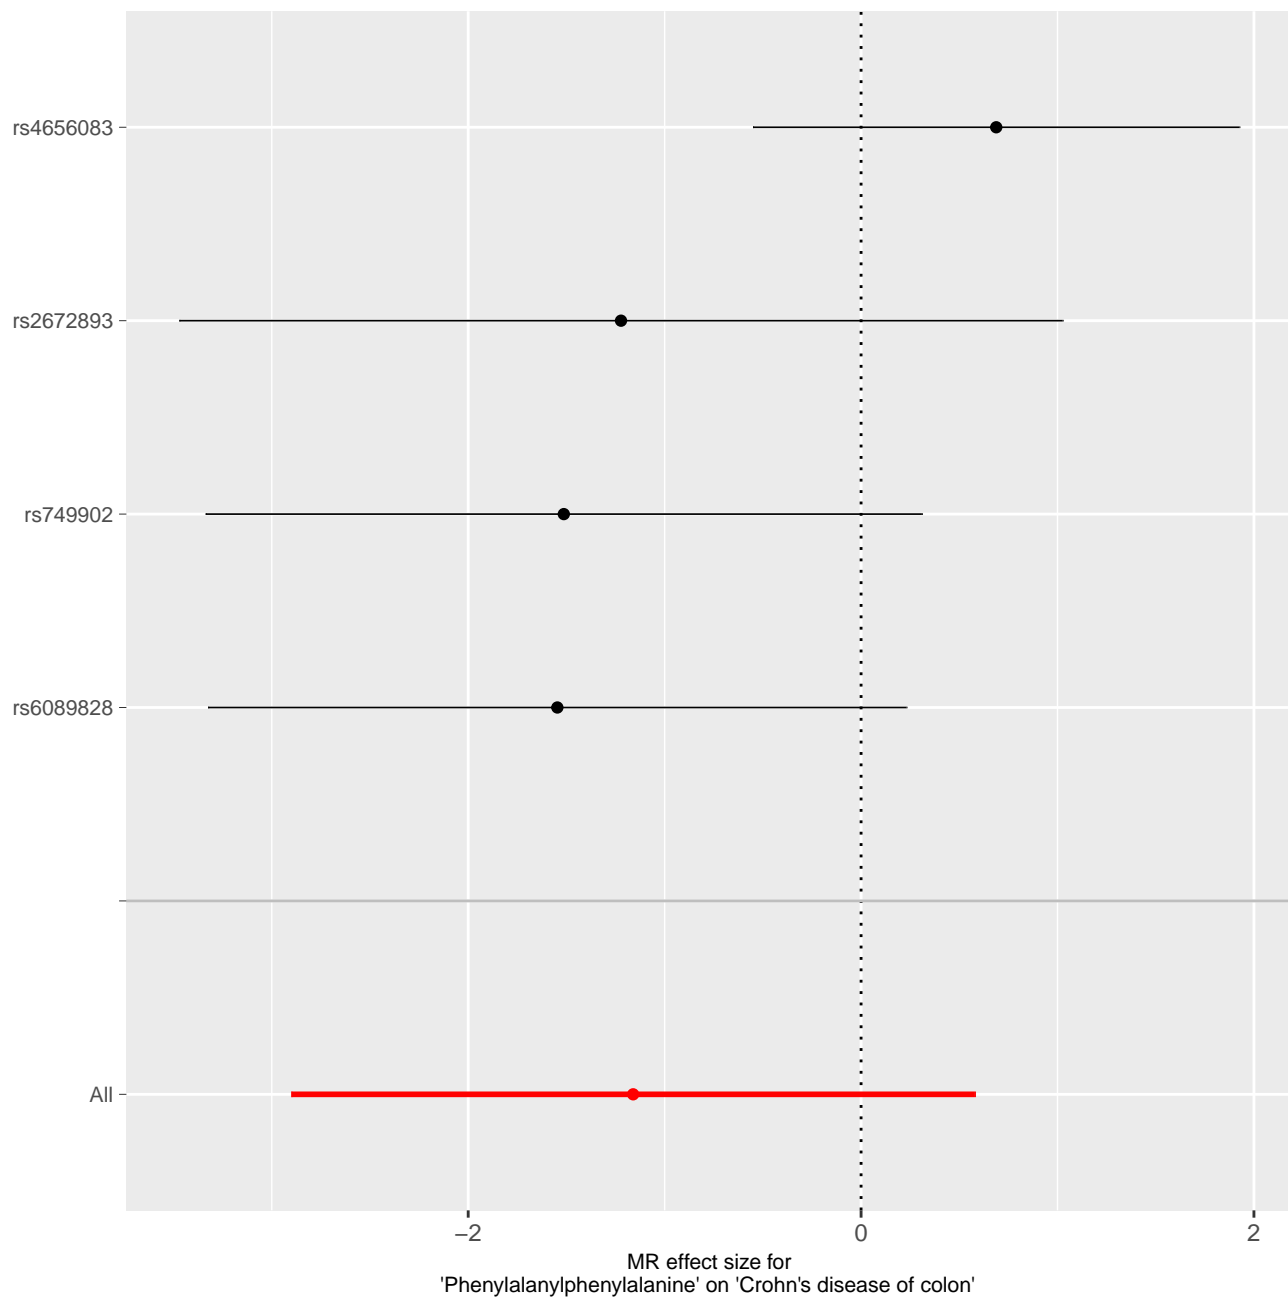

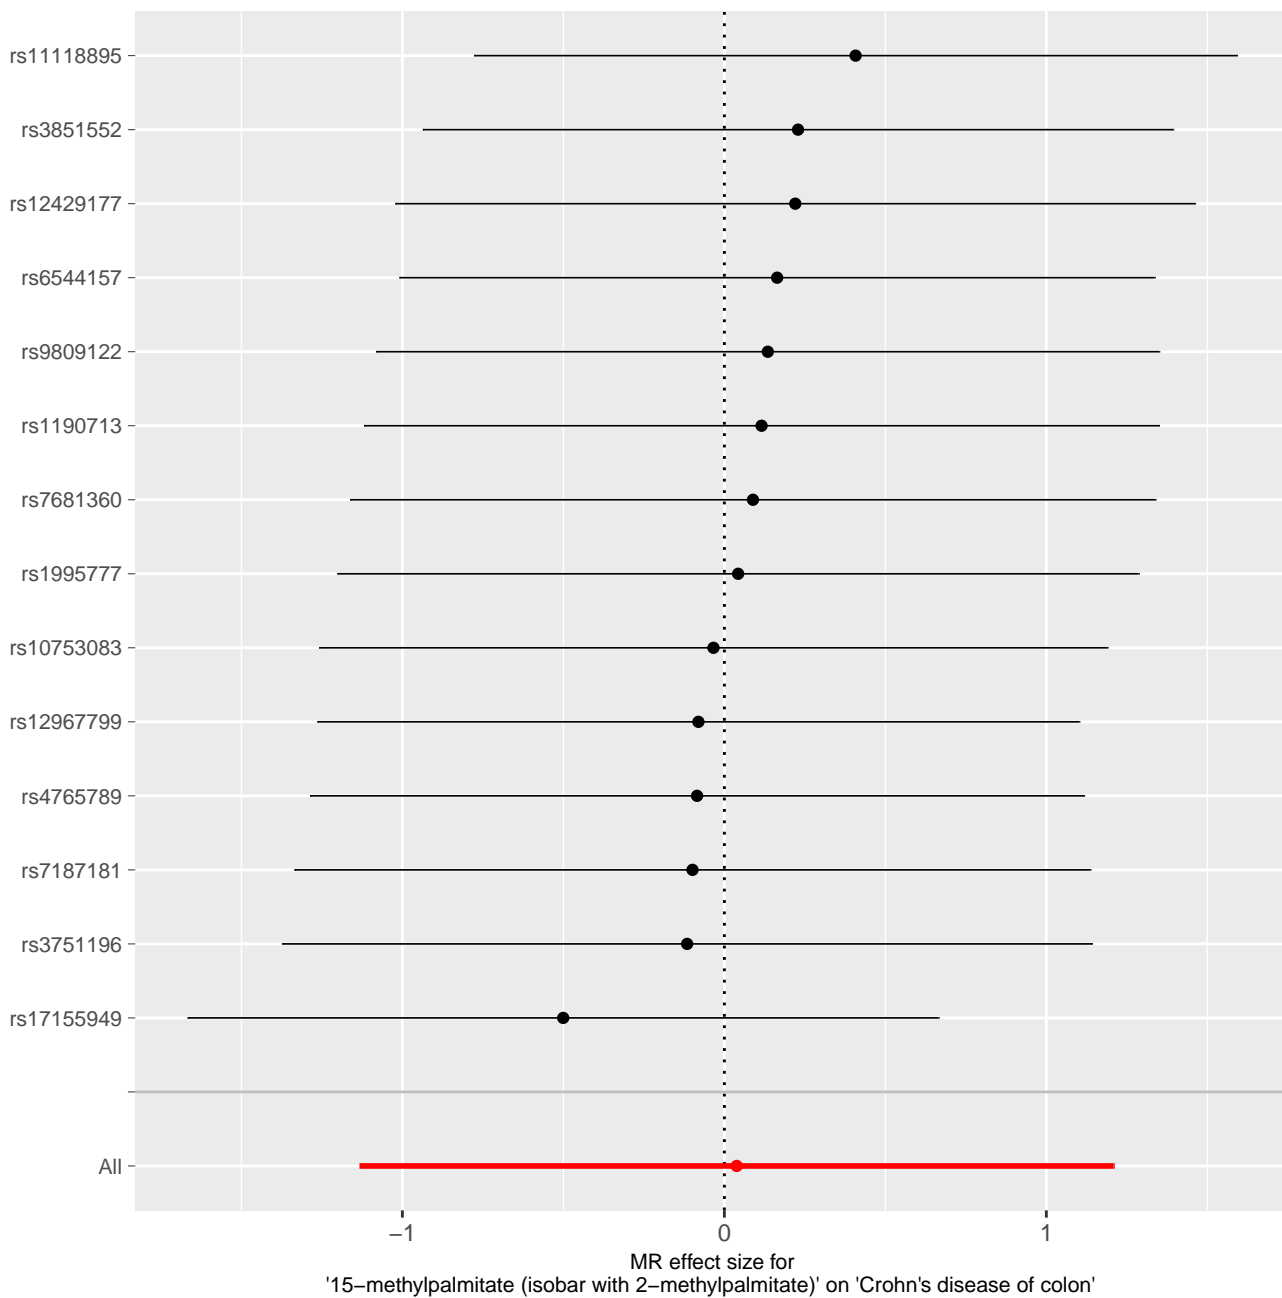

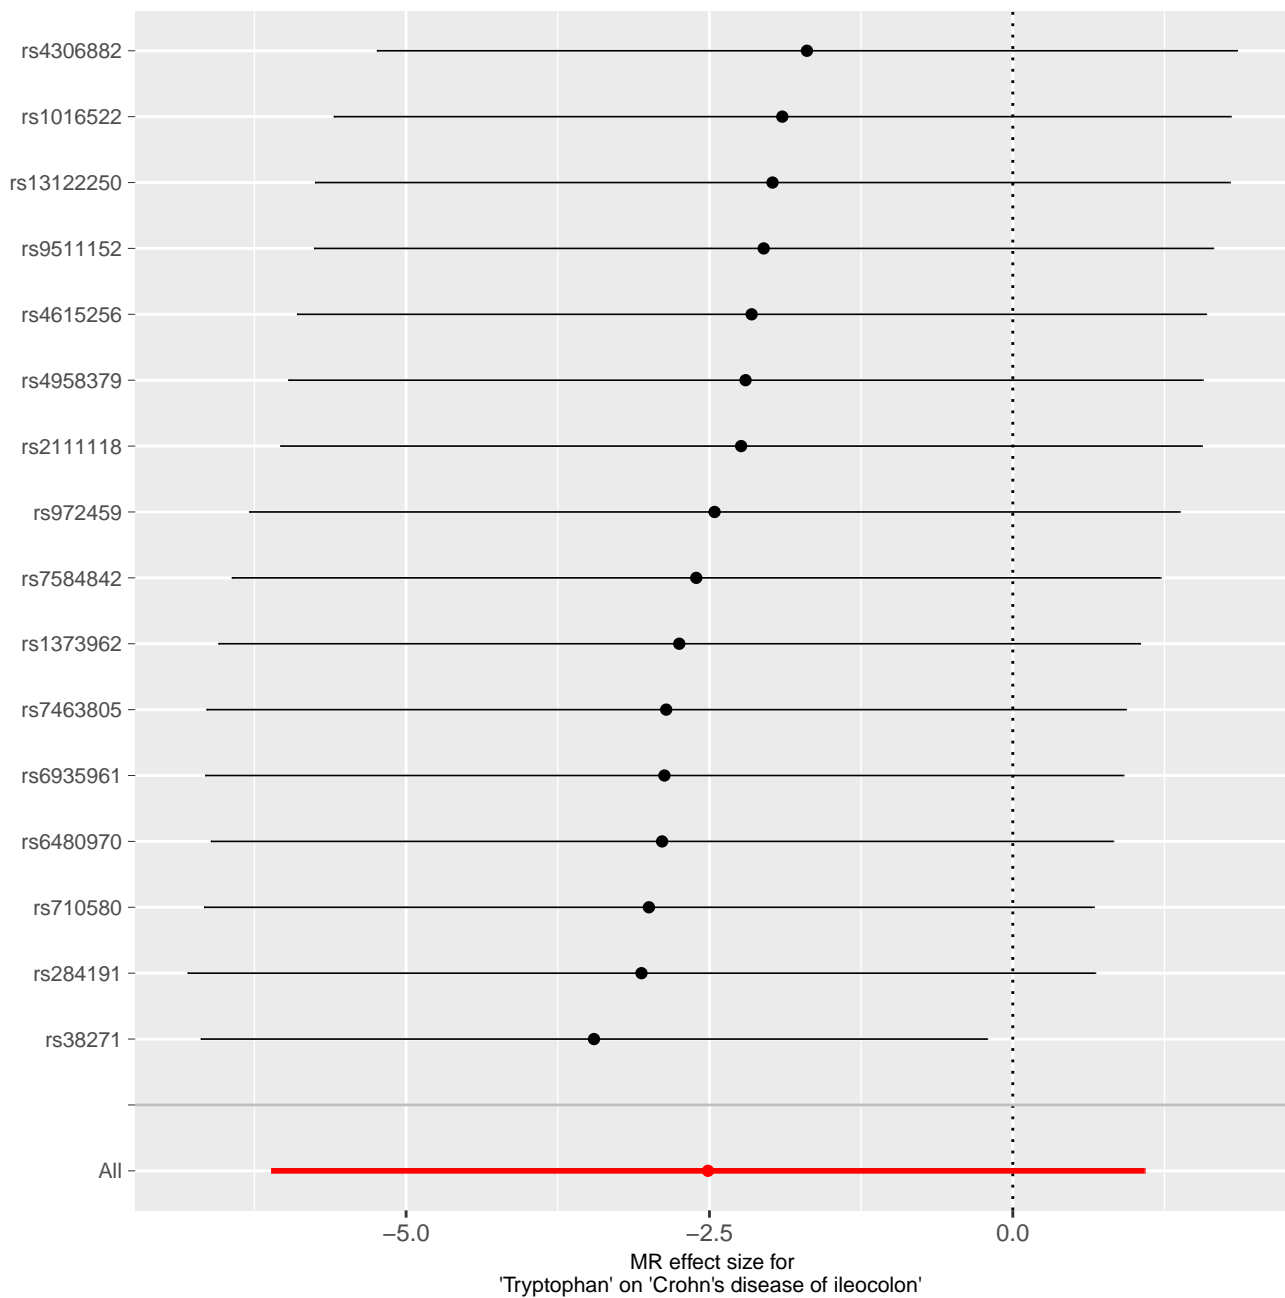

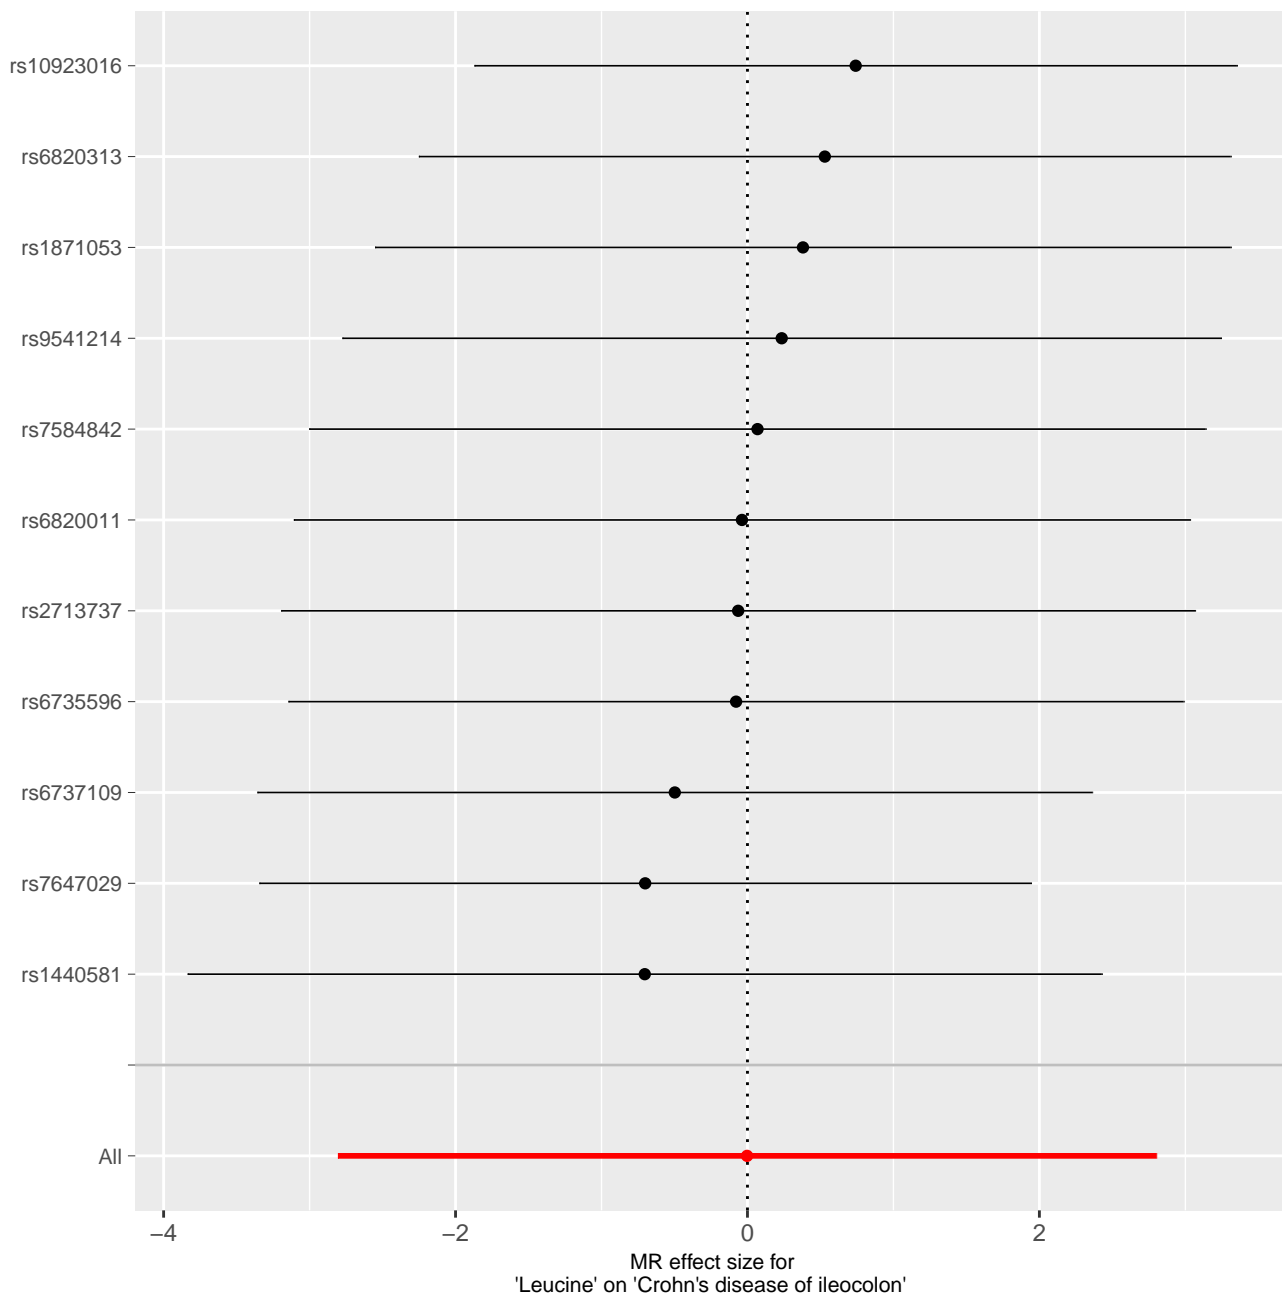

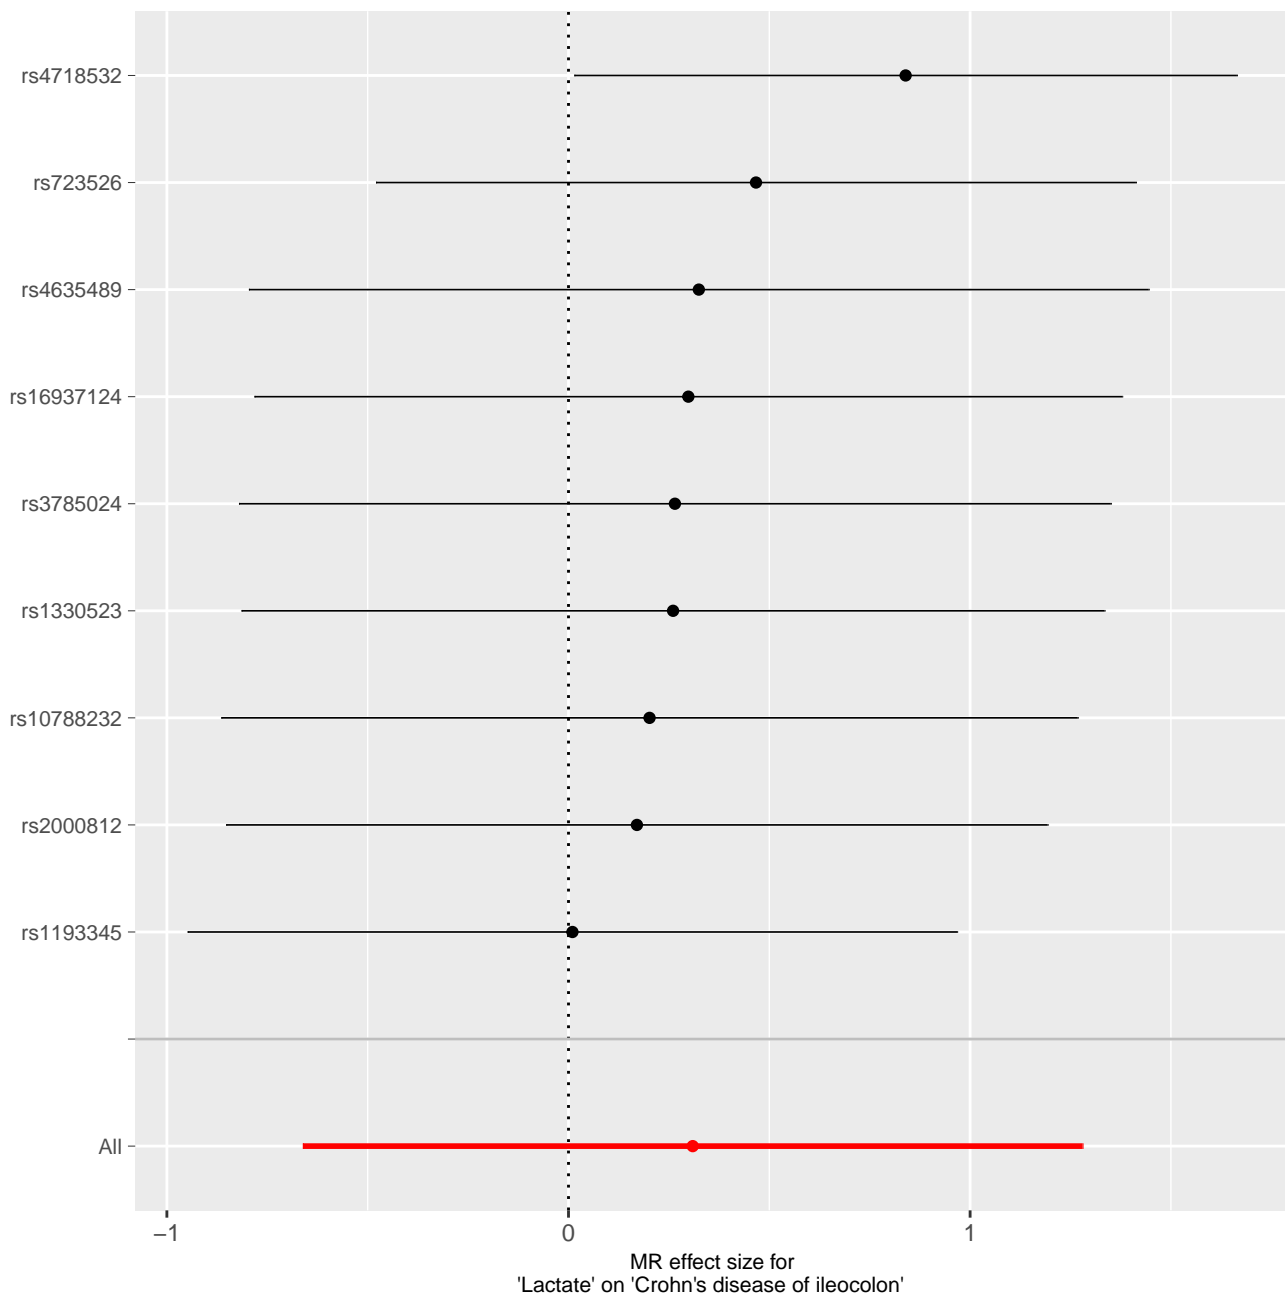

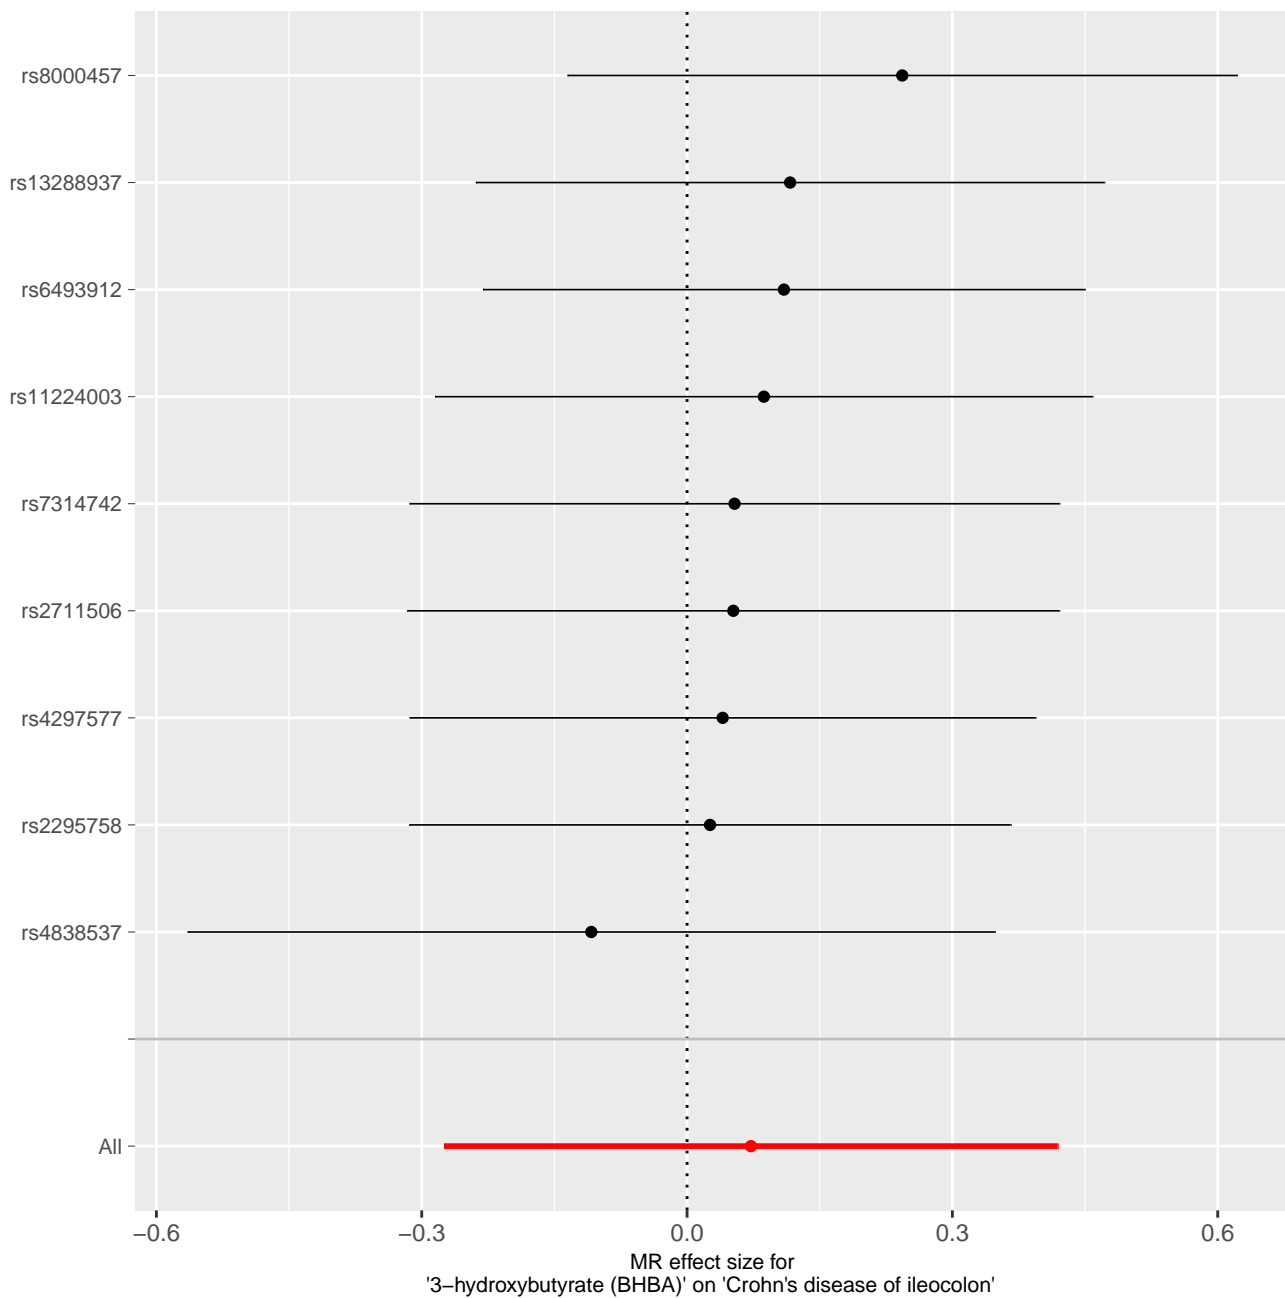

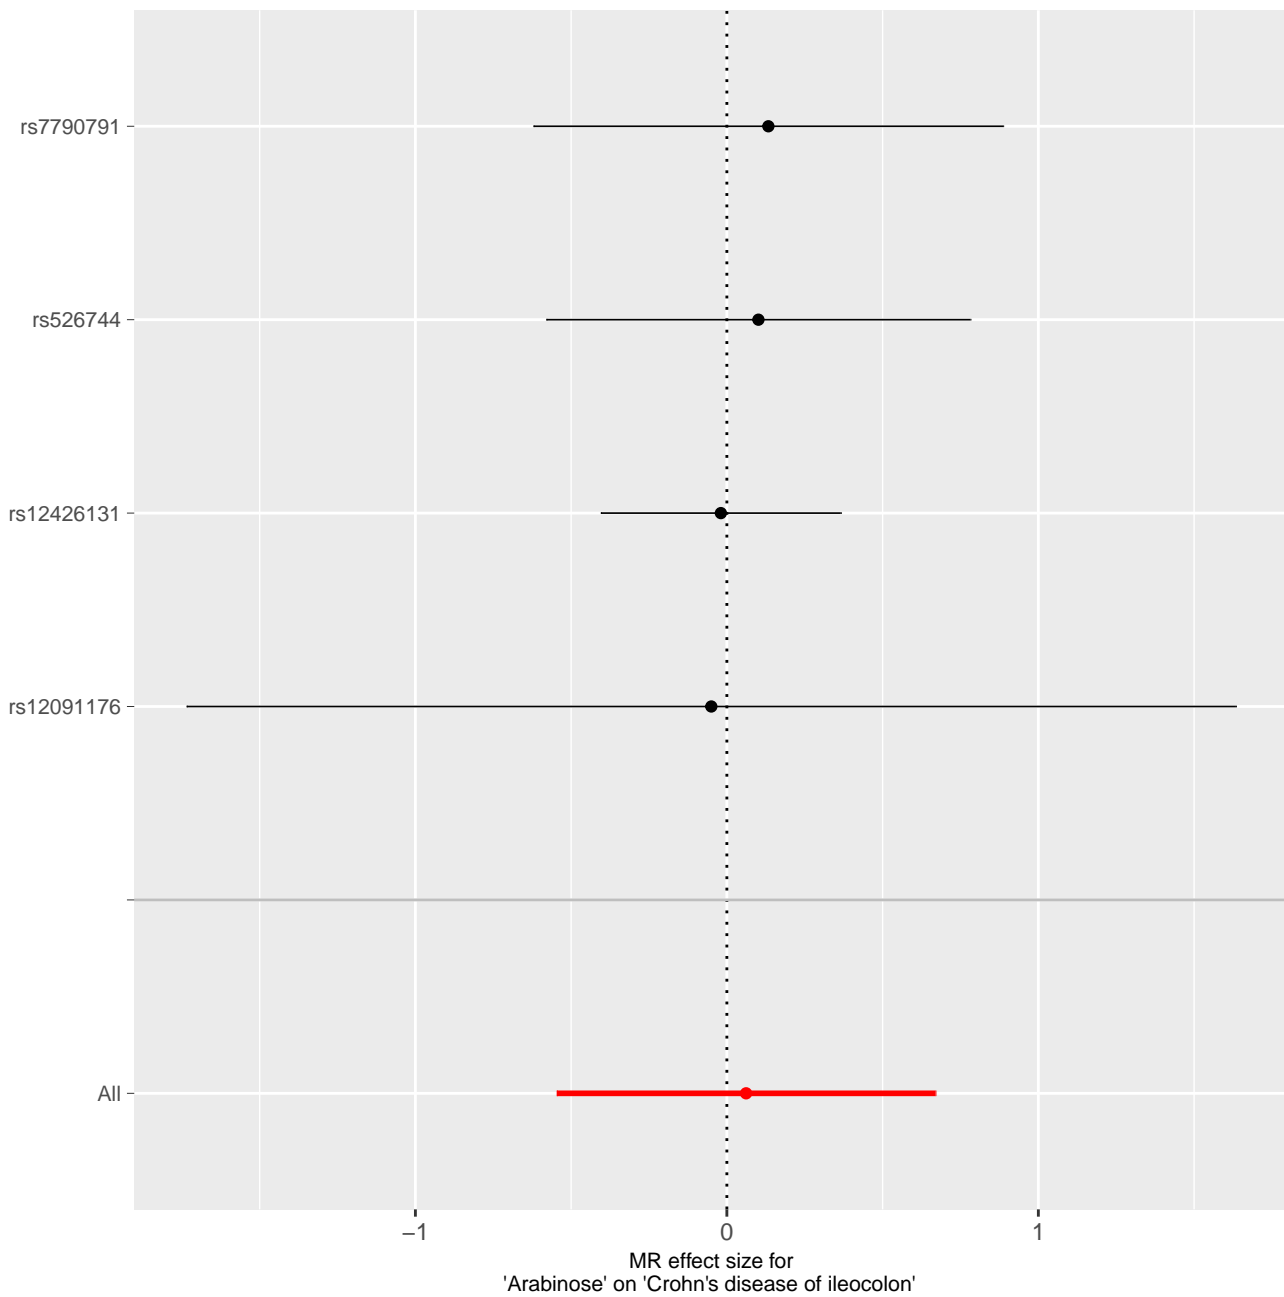

rs2456584

rs661454

rs4663119

All

-2.5

0.0

2.5

5.0

7.5

MR effect size for

'Fructose' on 'Crohn's disease of ileocolon'



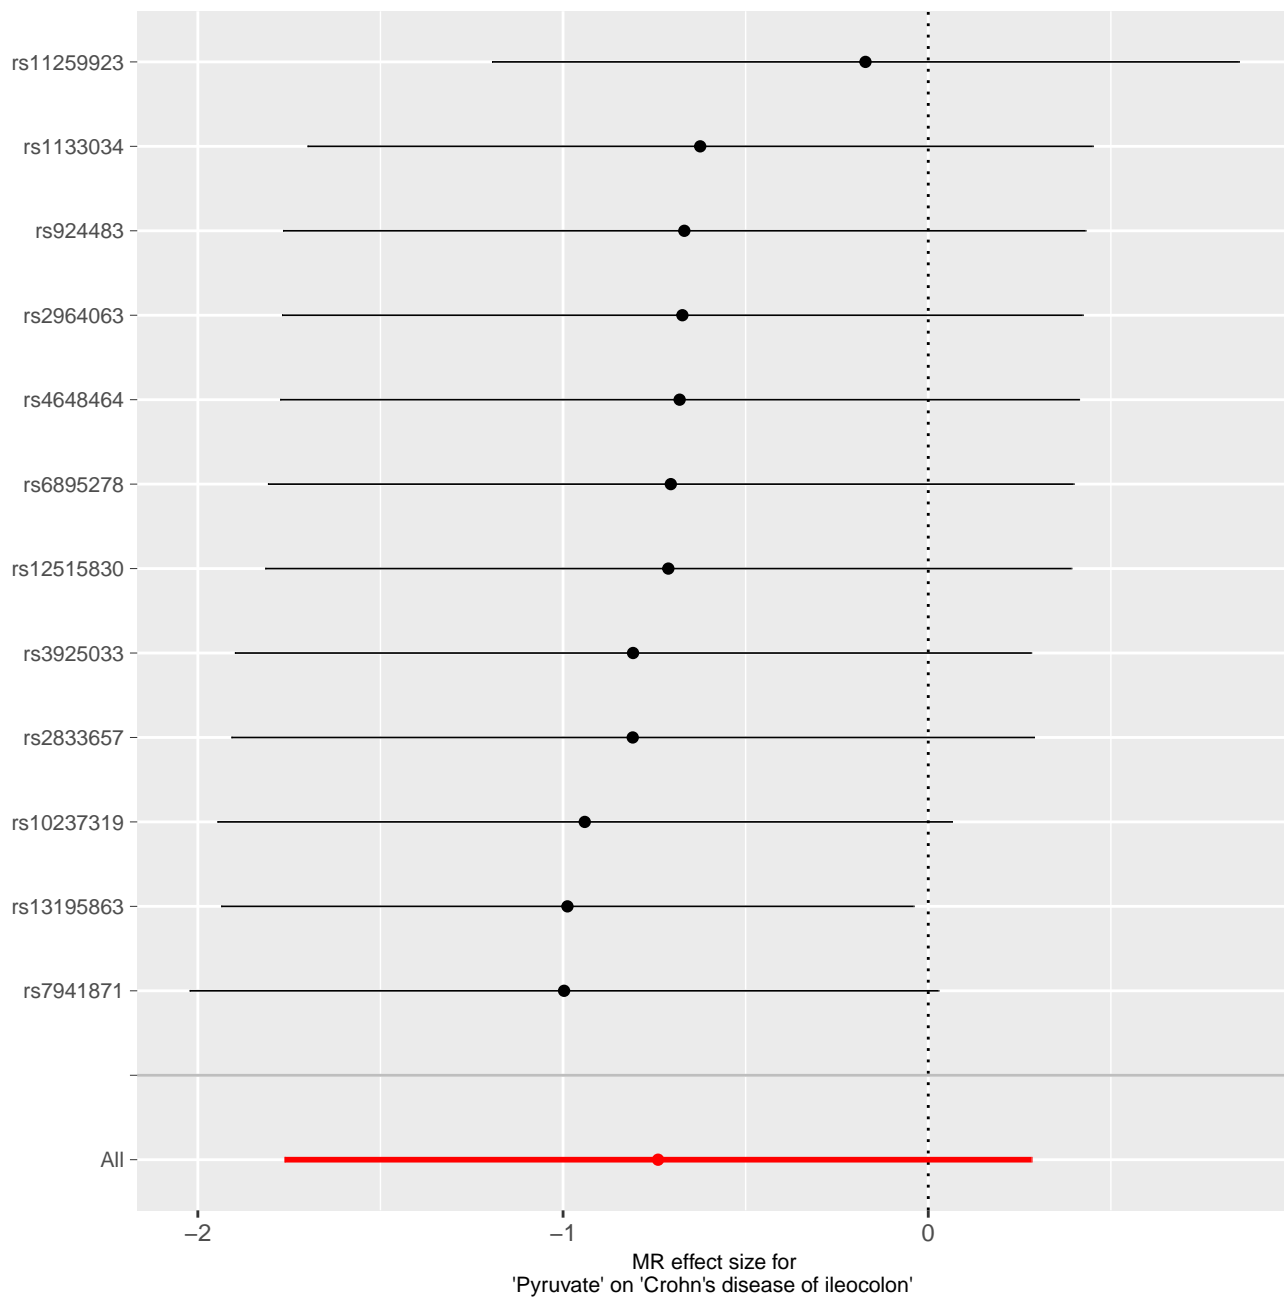

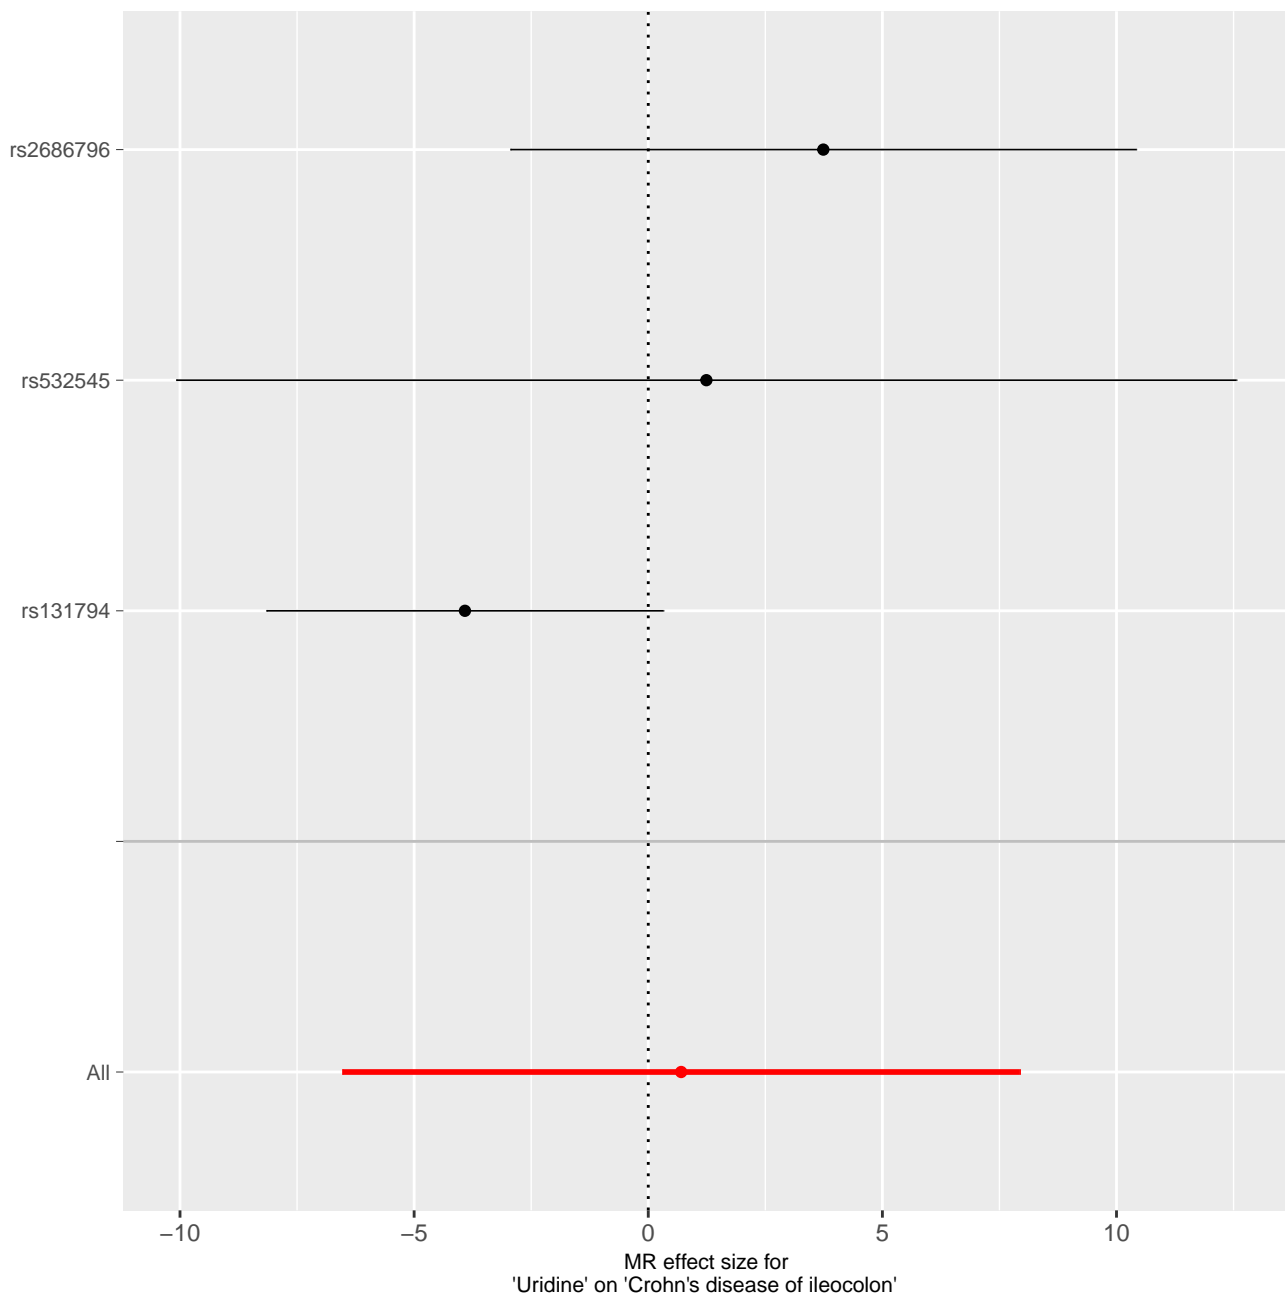

Batch 290 : Linoleate (18:2n6) on Crohn's disease of ileocolon

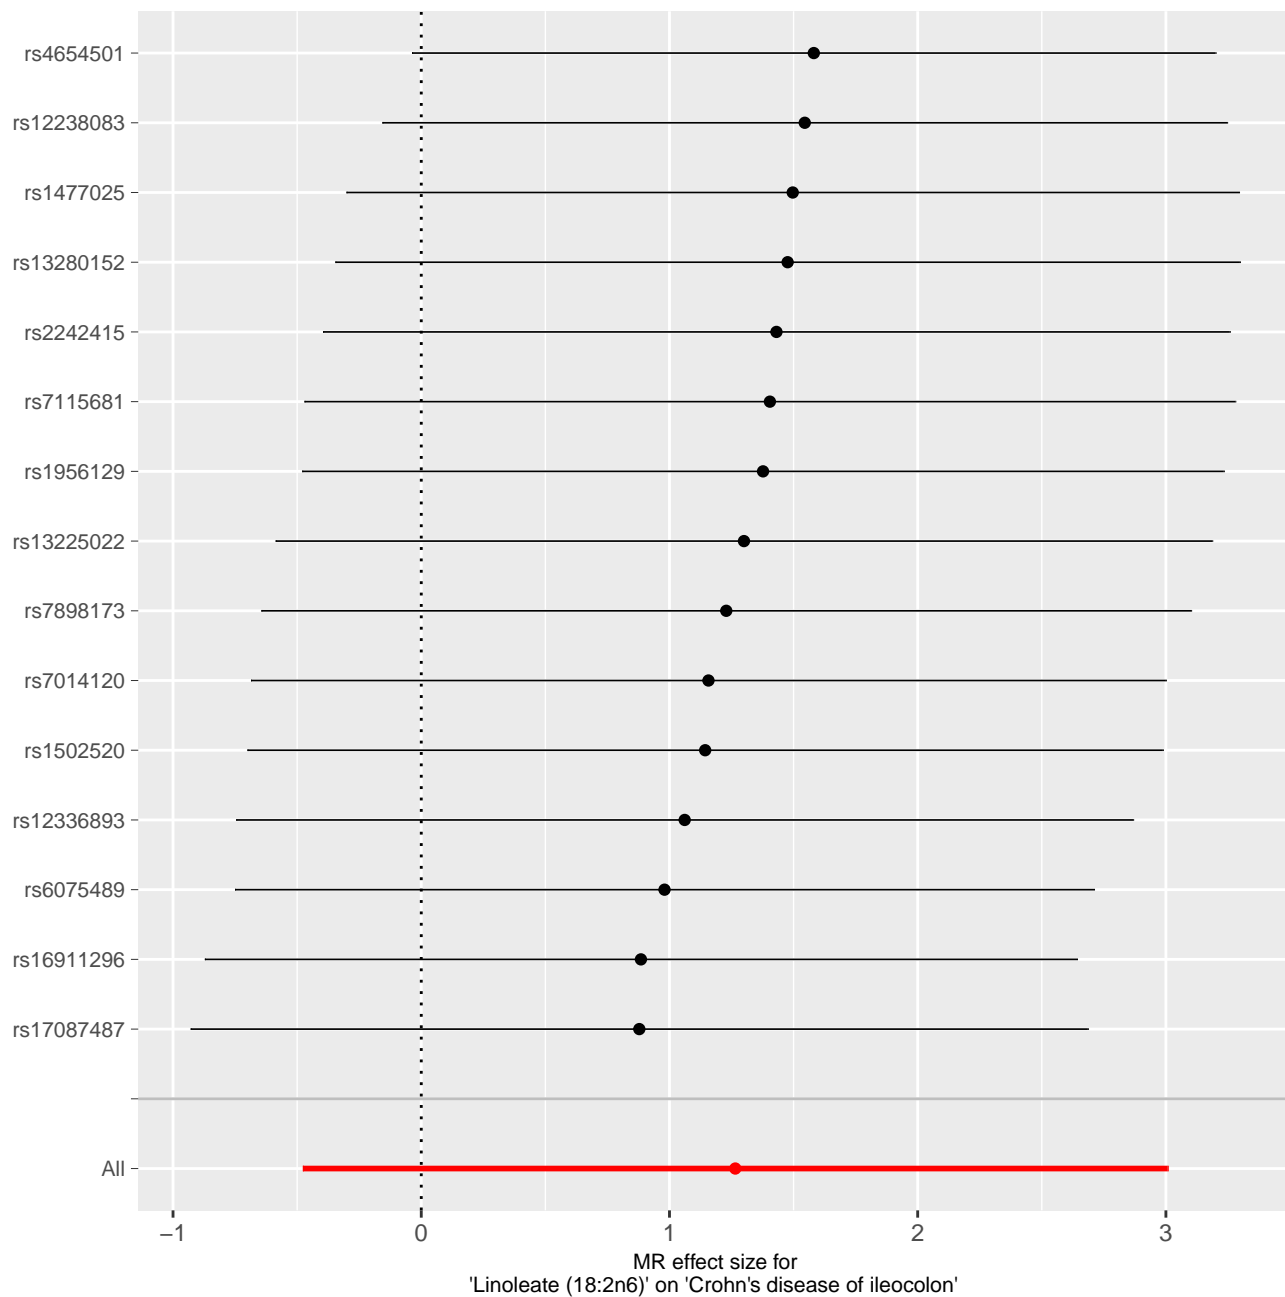

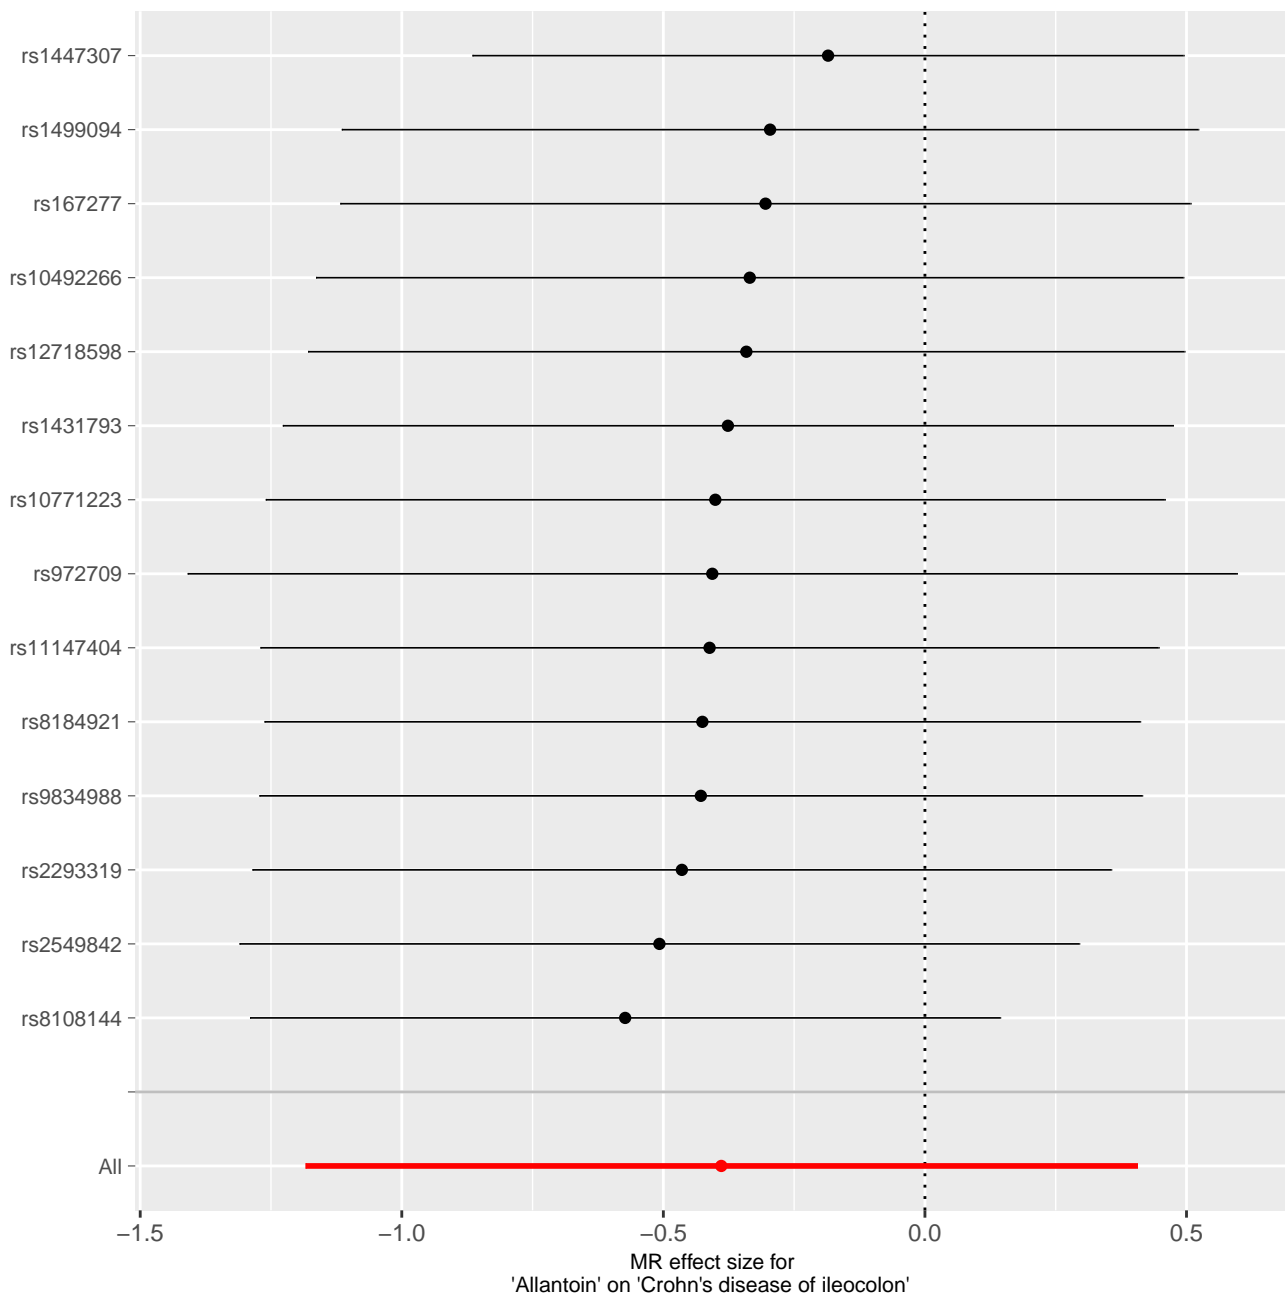

Batch 296 : Isoleucine on Crohn's disease of ileocolon

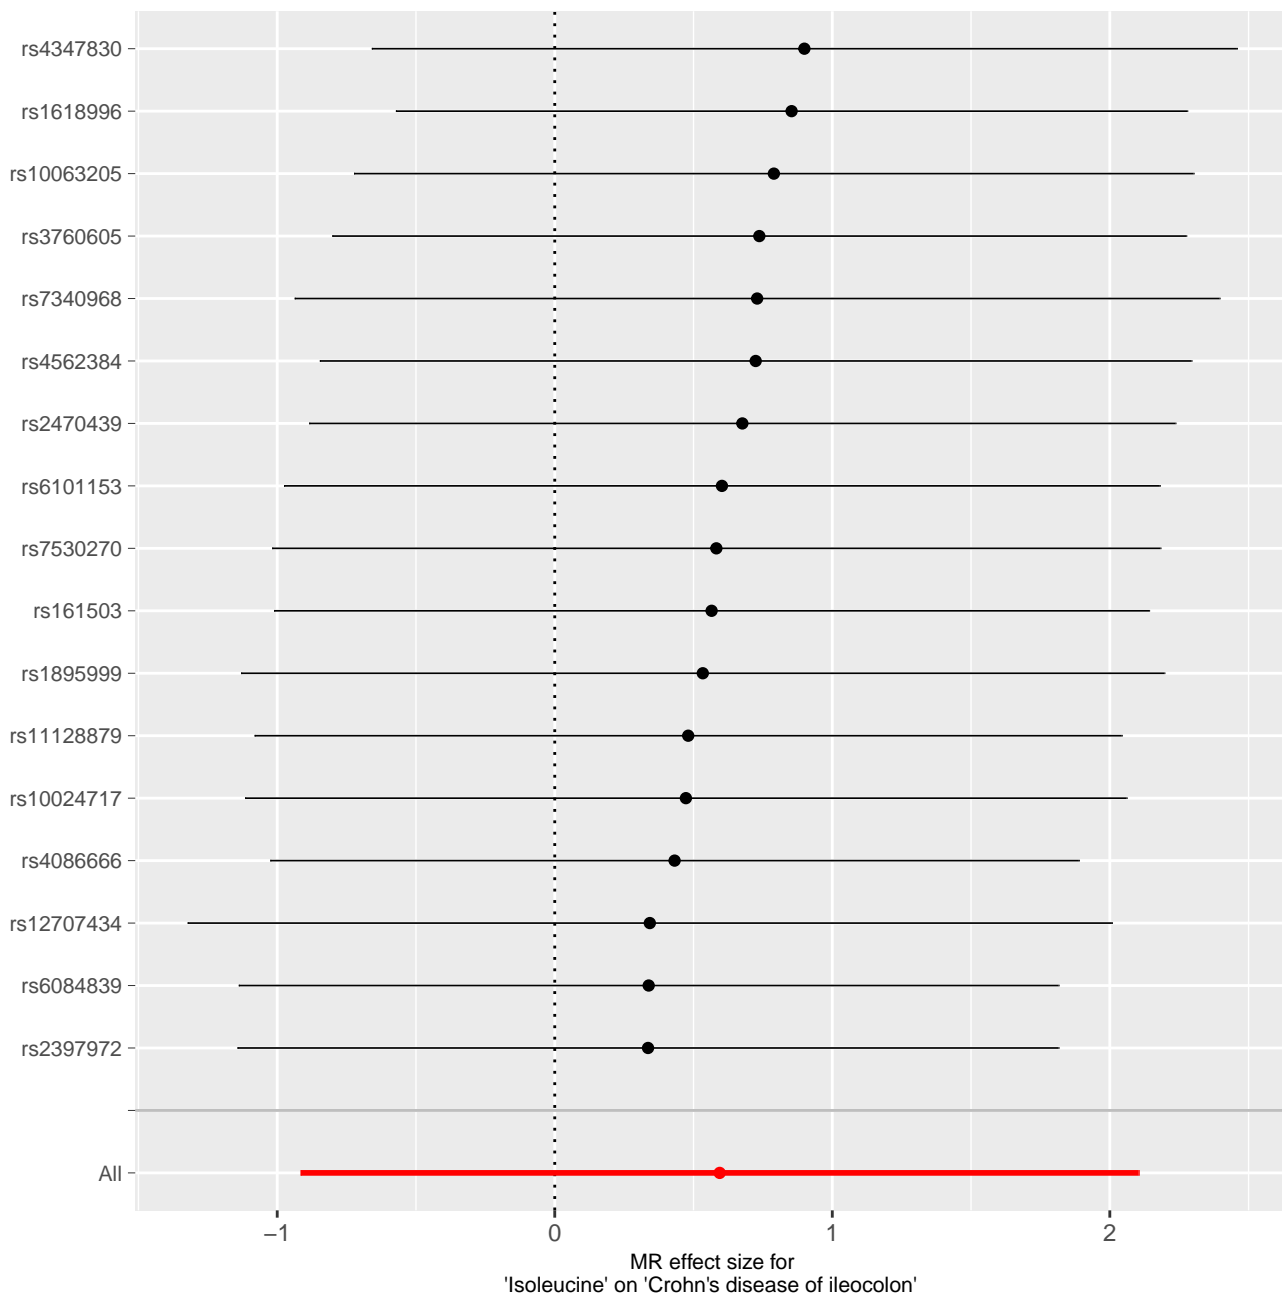

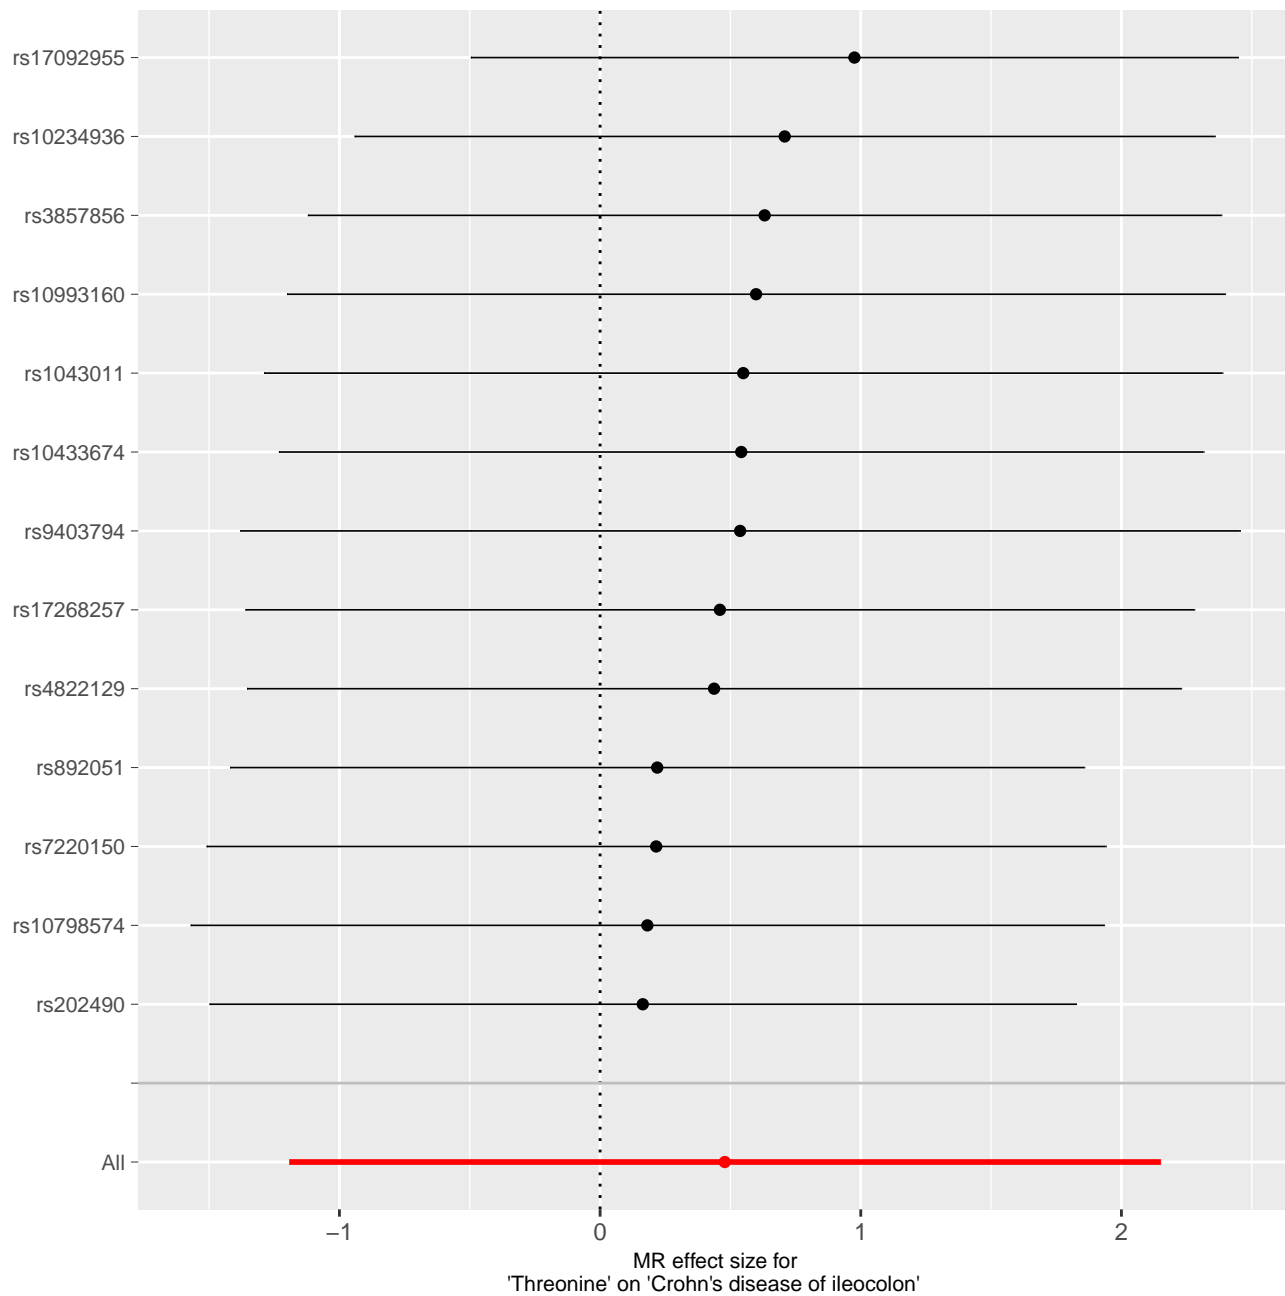

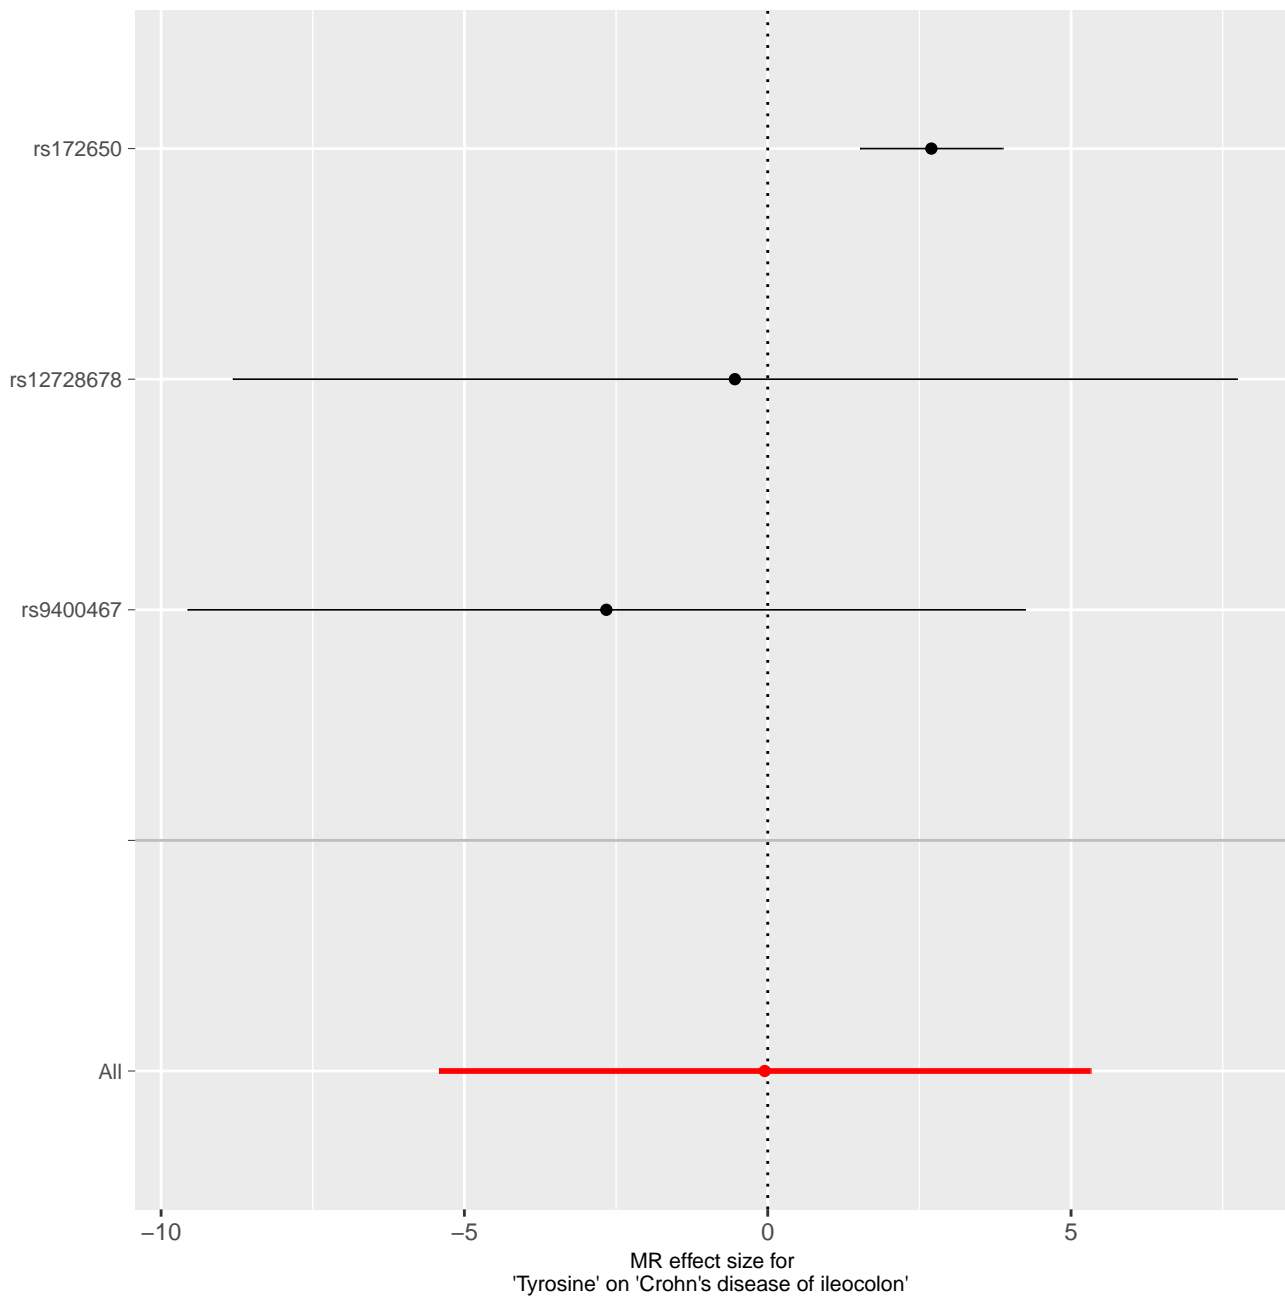

Batch 307 : Myristate (14:0) on Crohn's disease of ileocolon

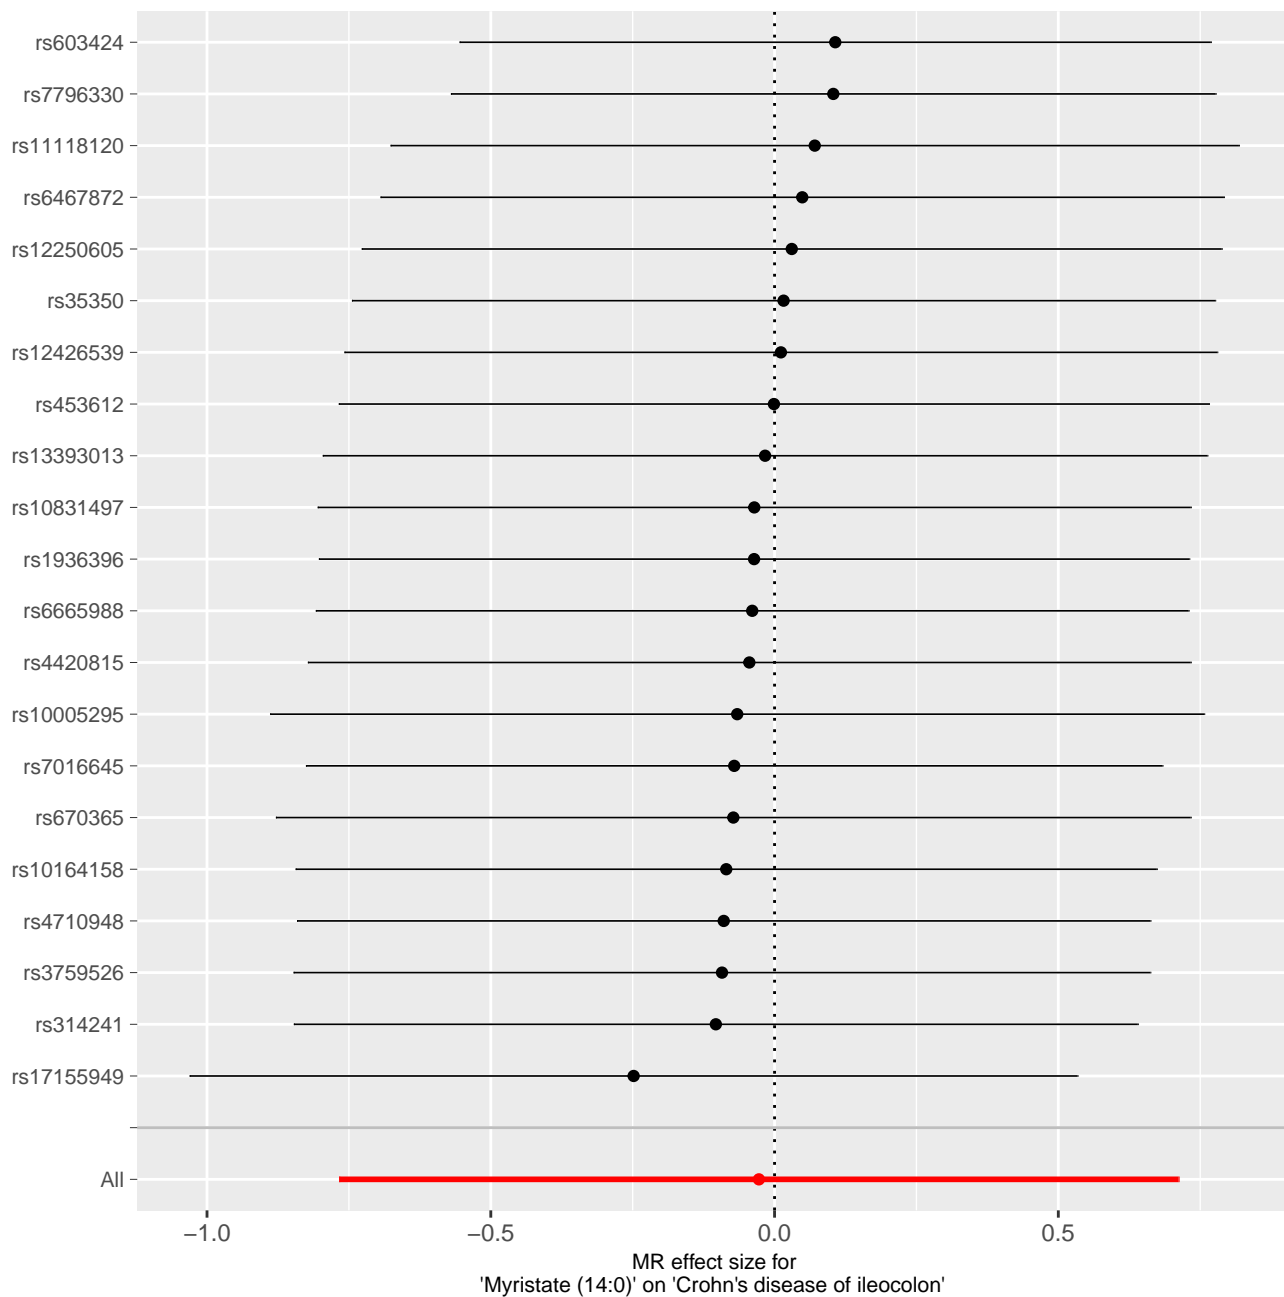



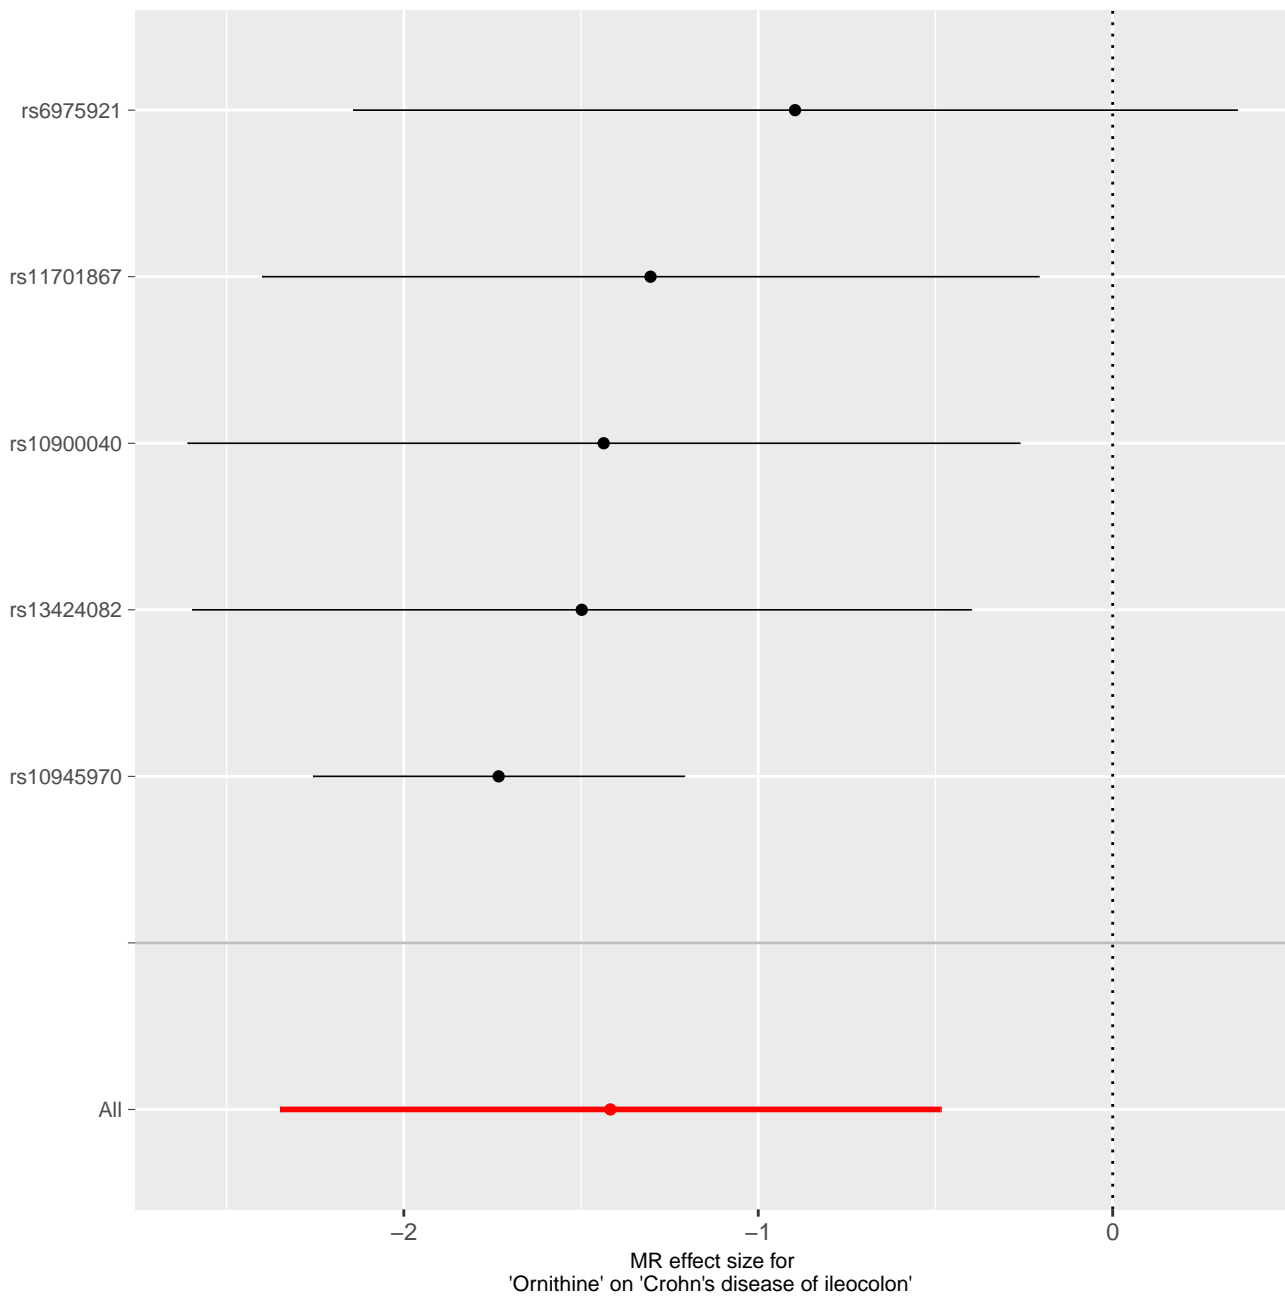

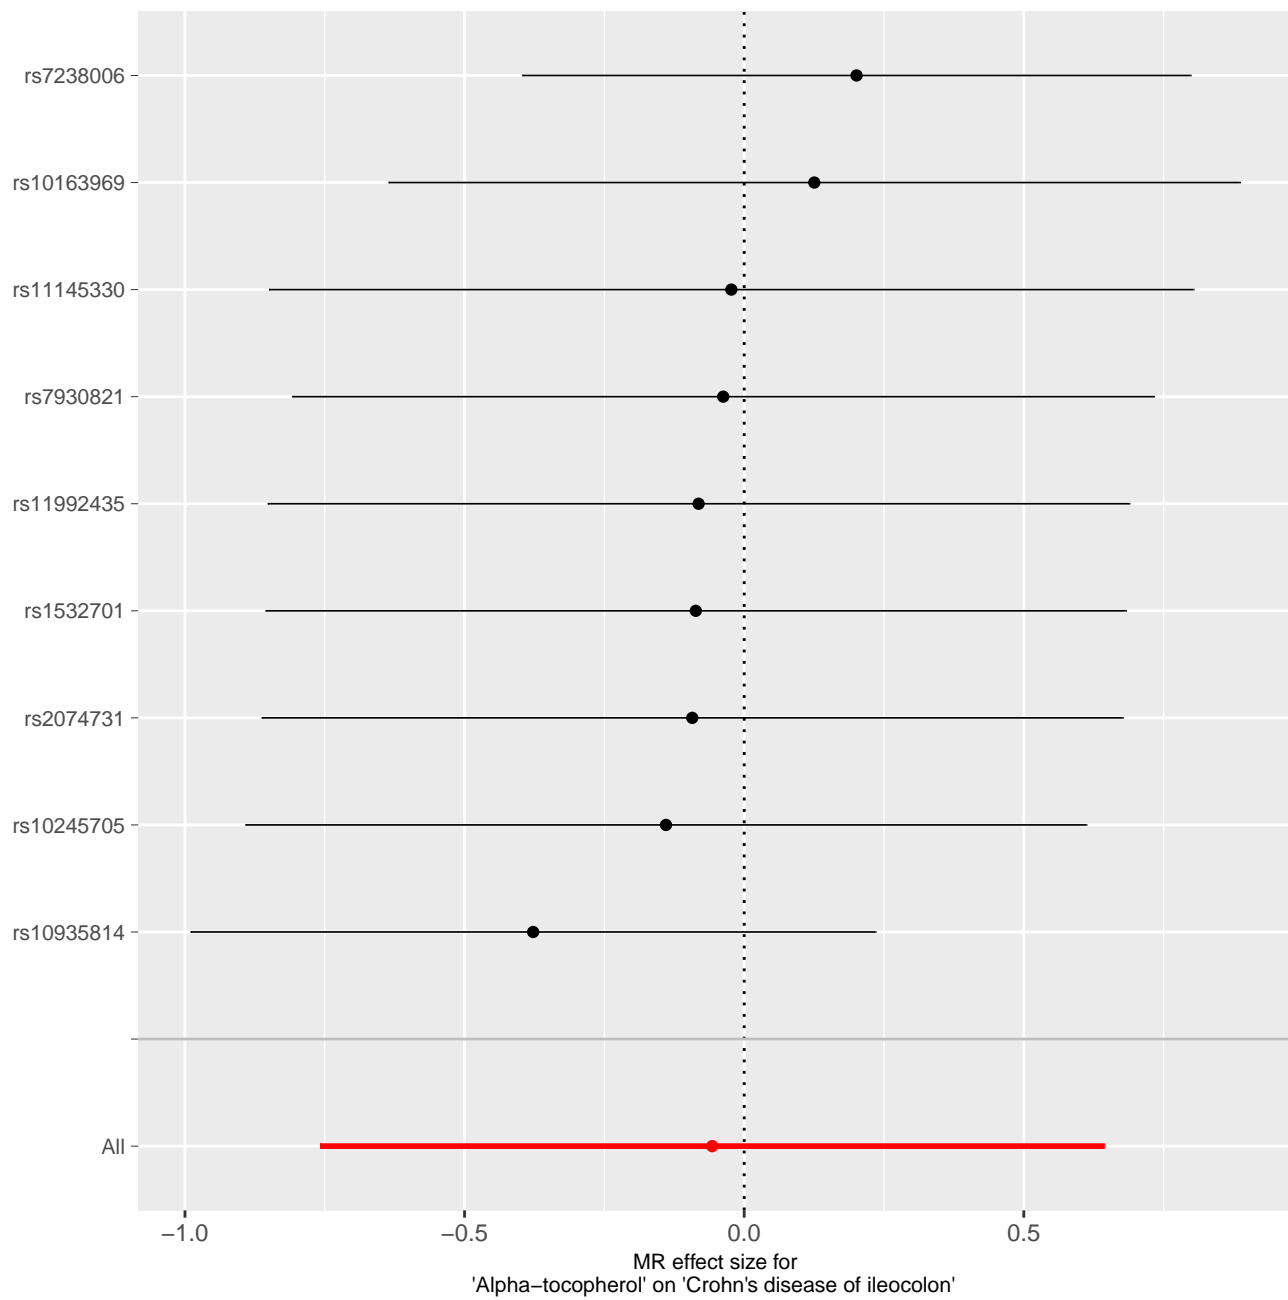

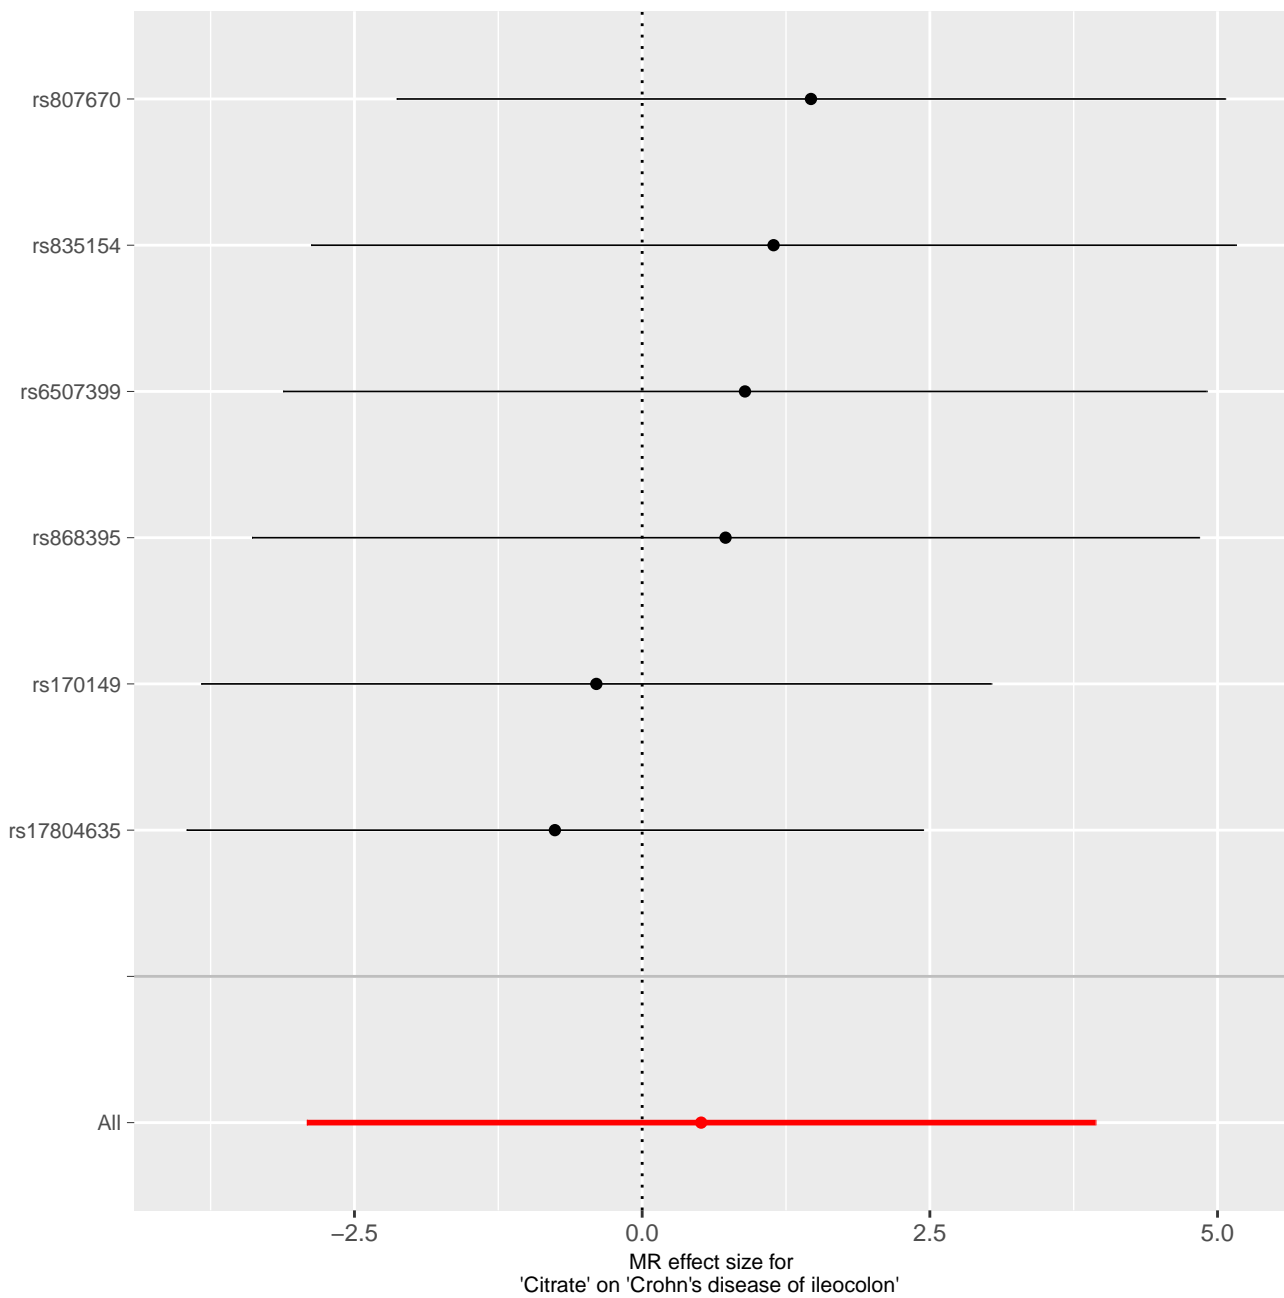

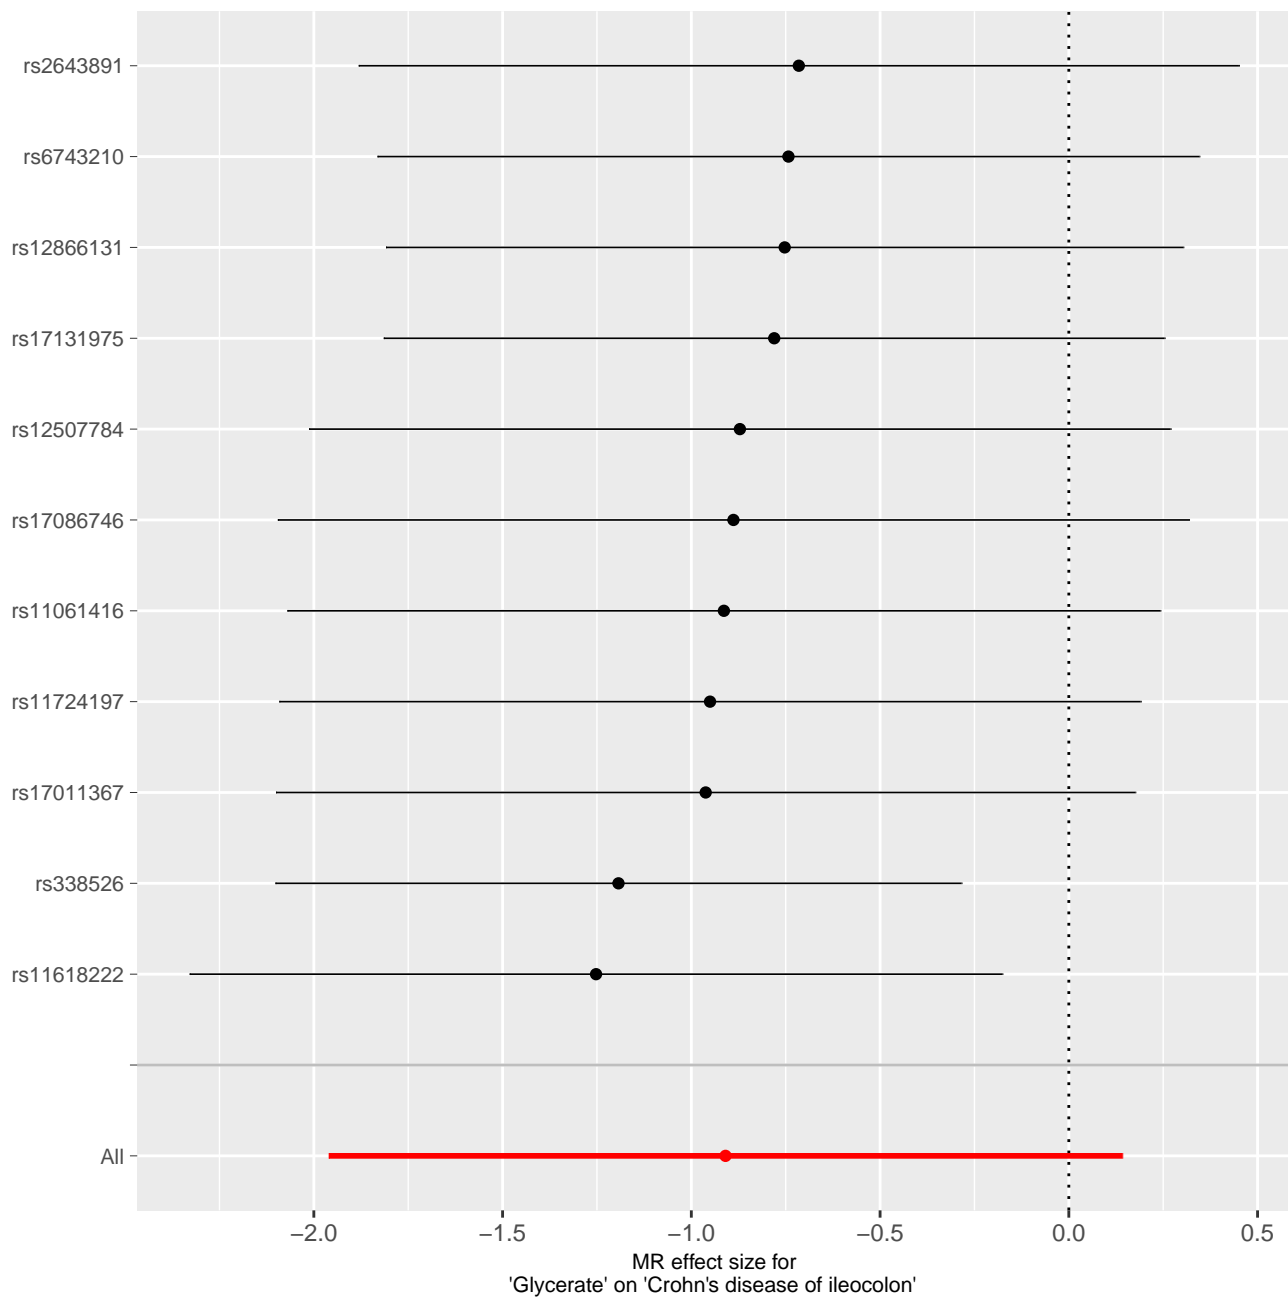

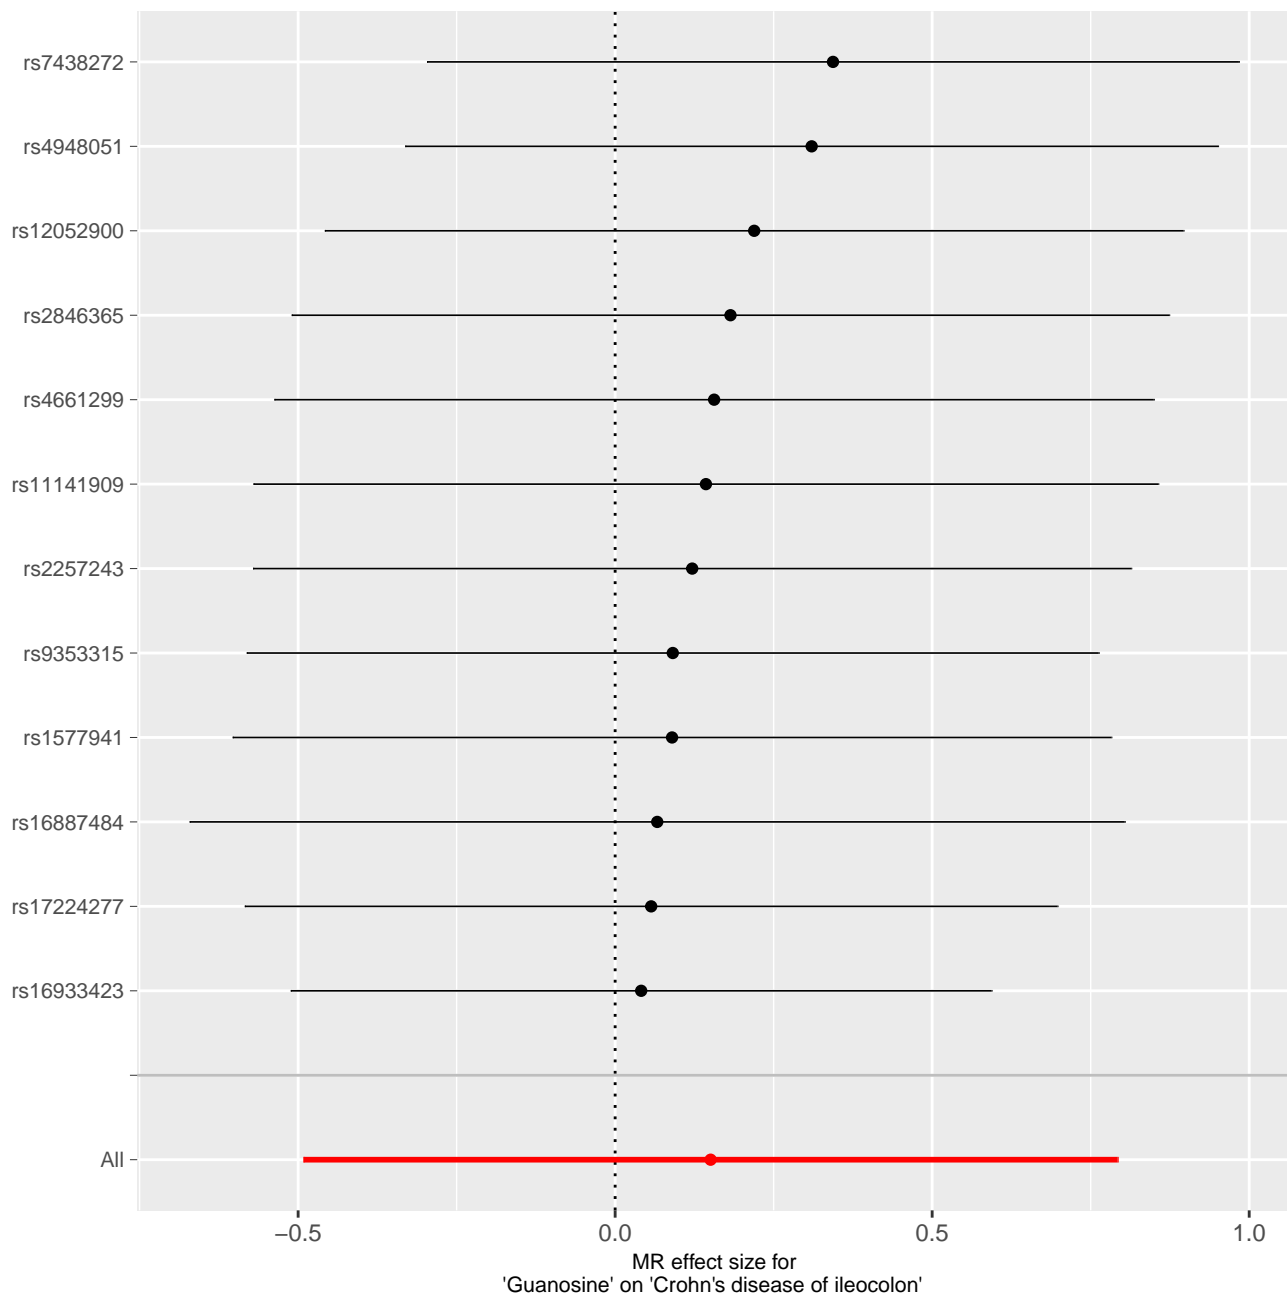

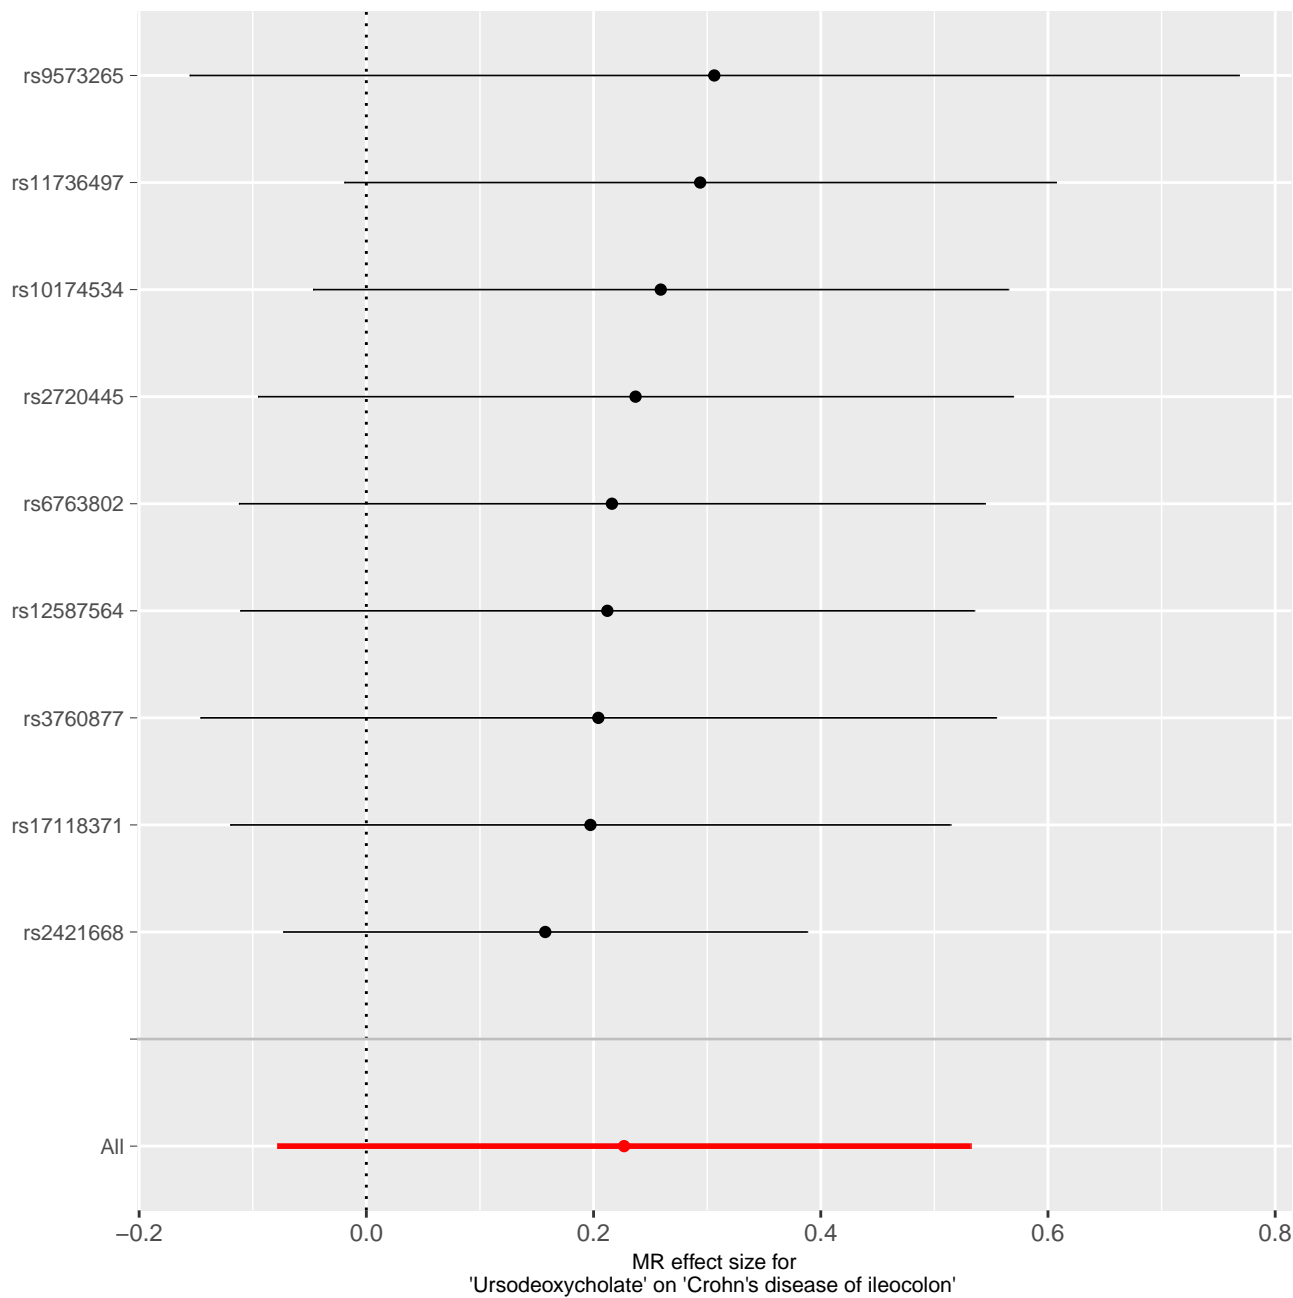

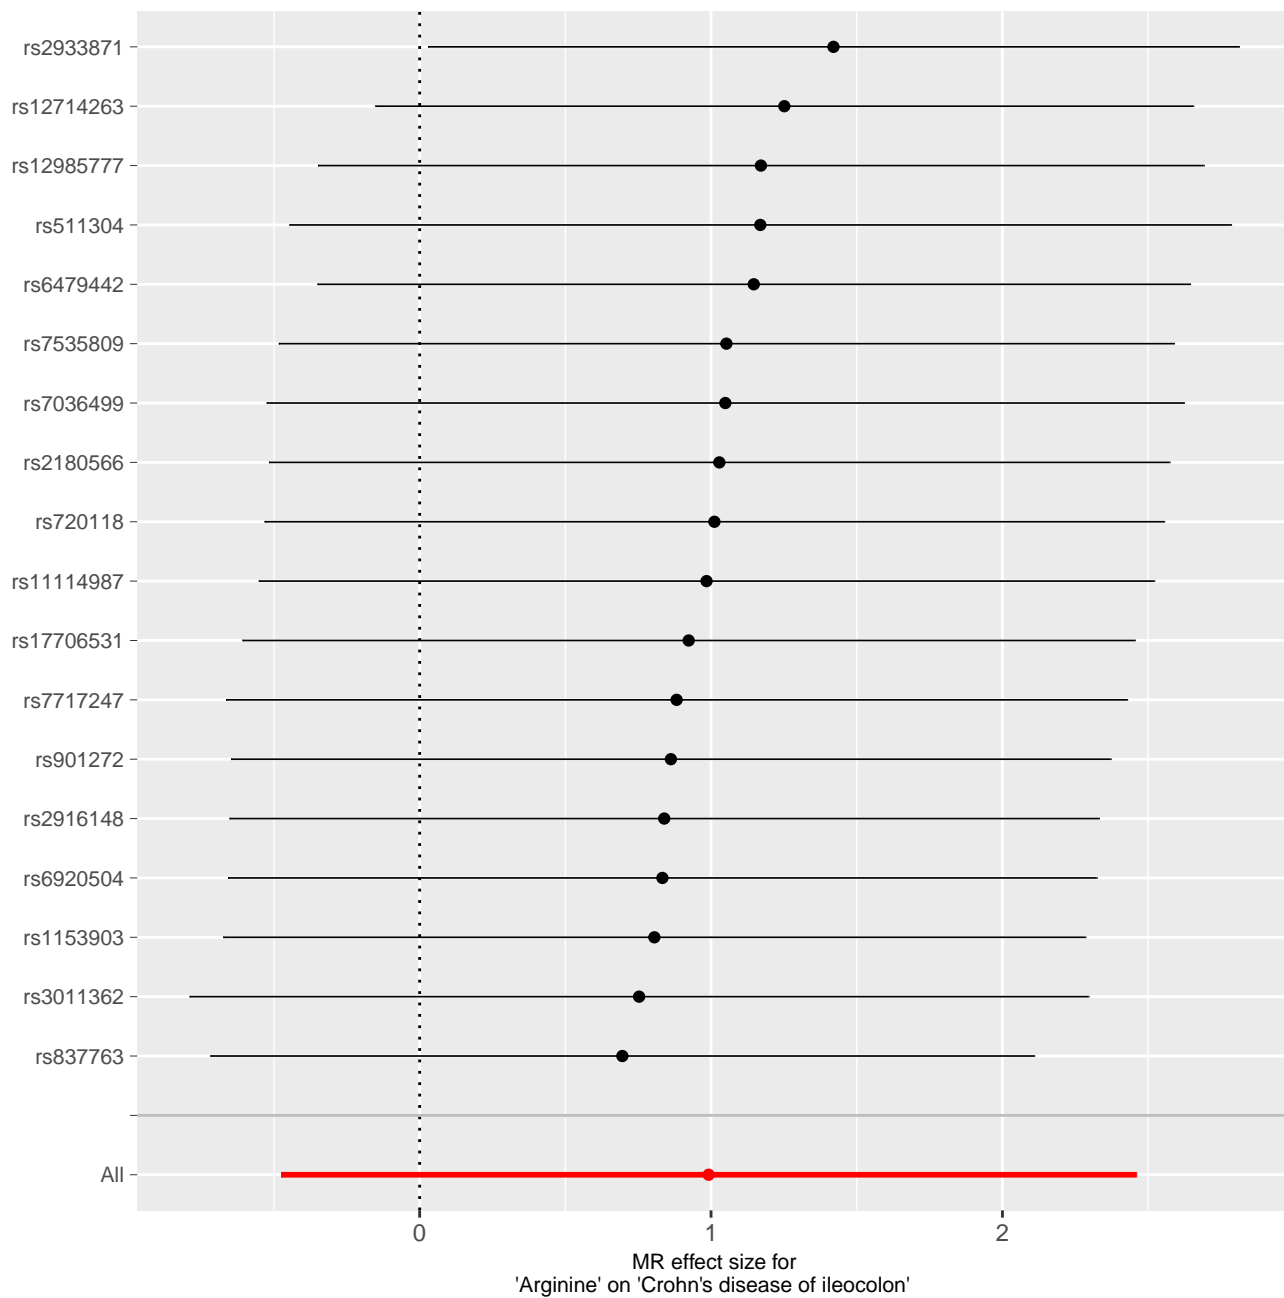

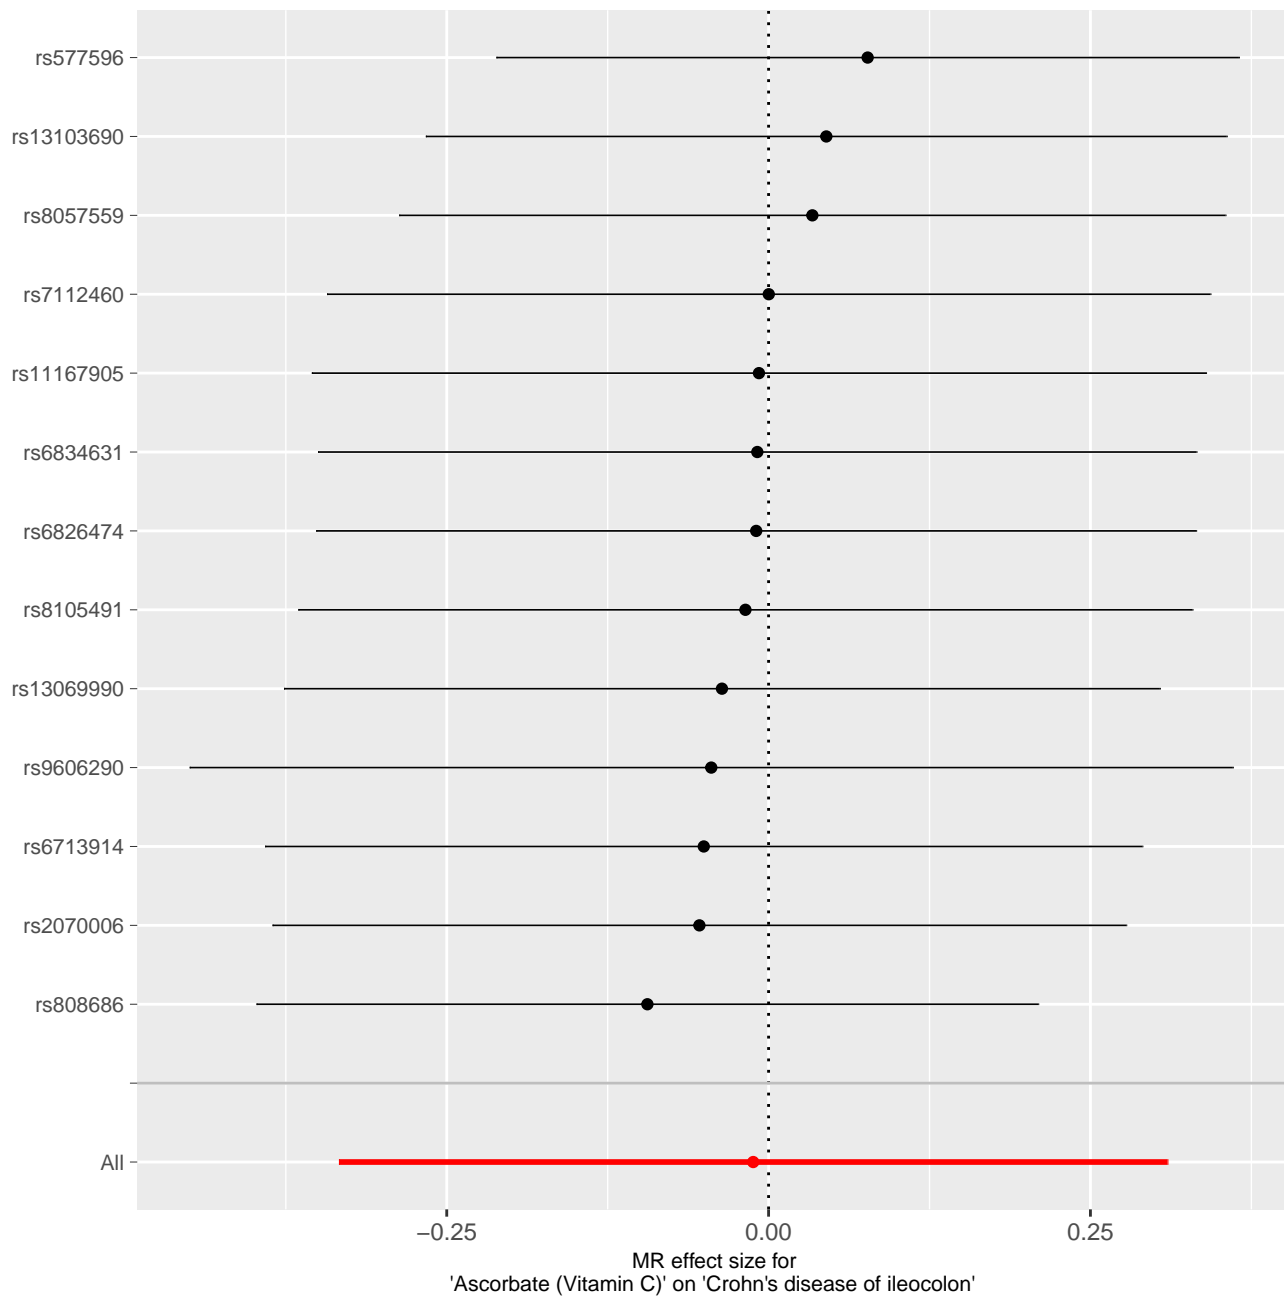



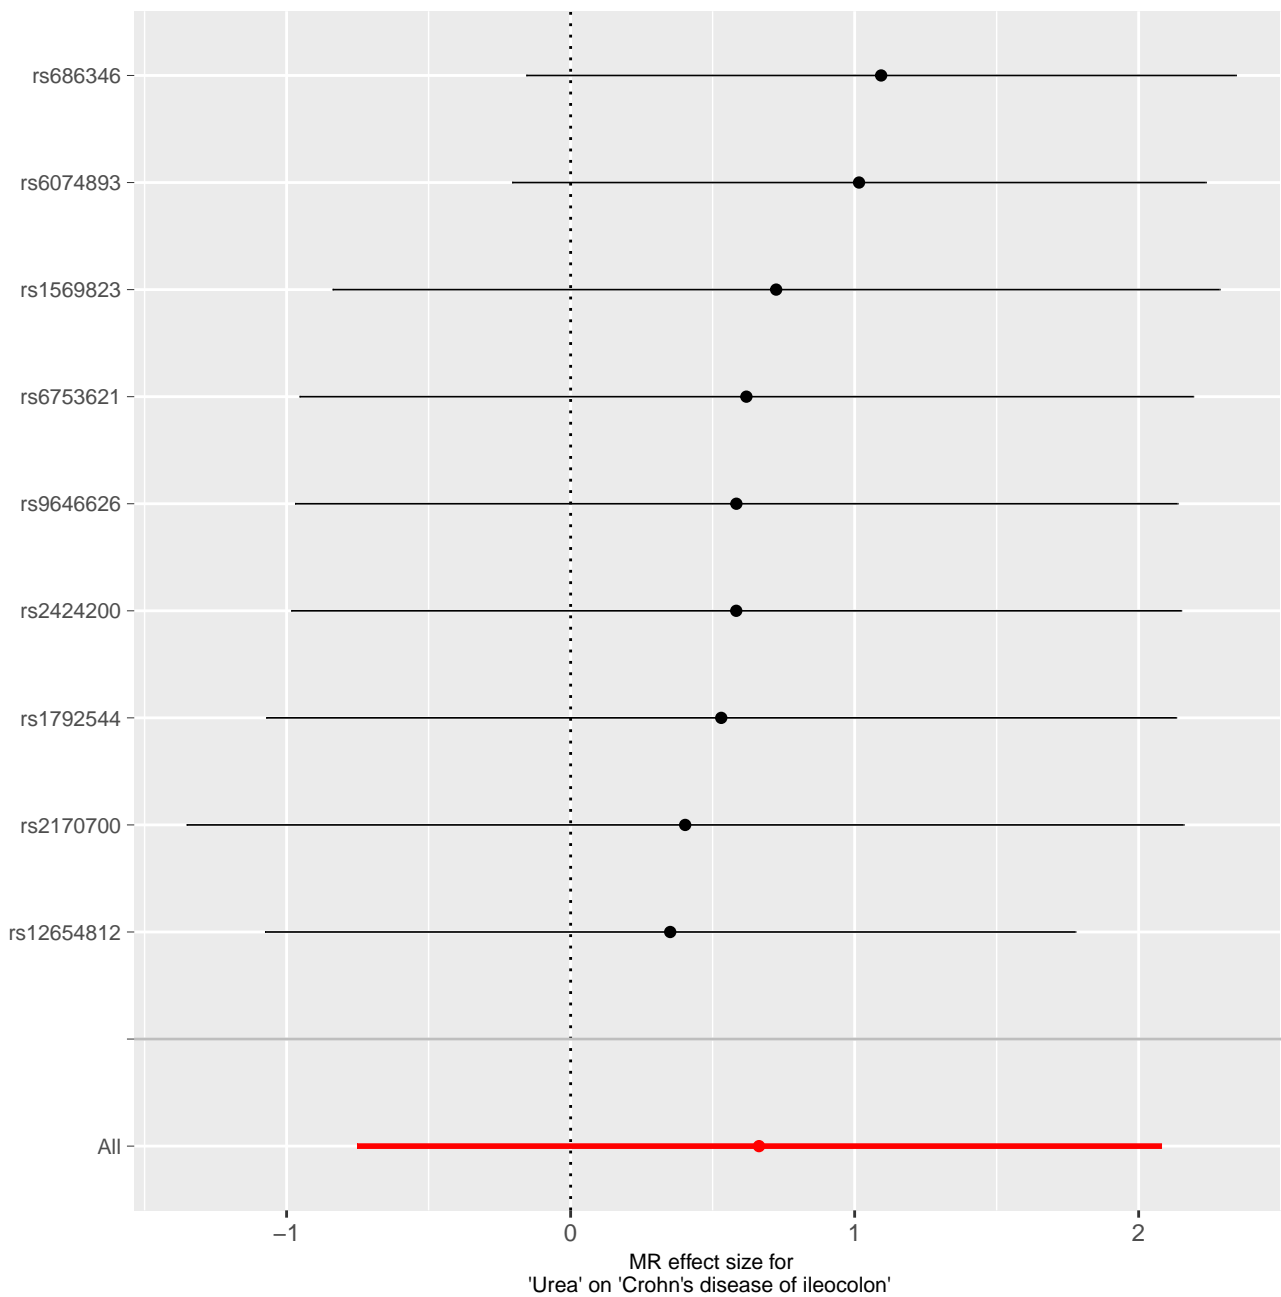

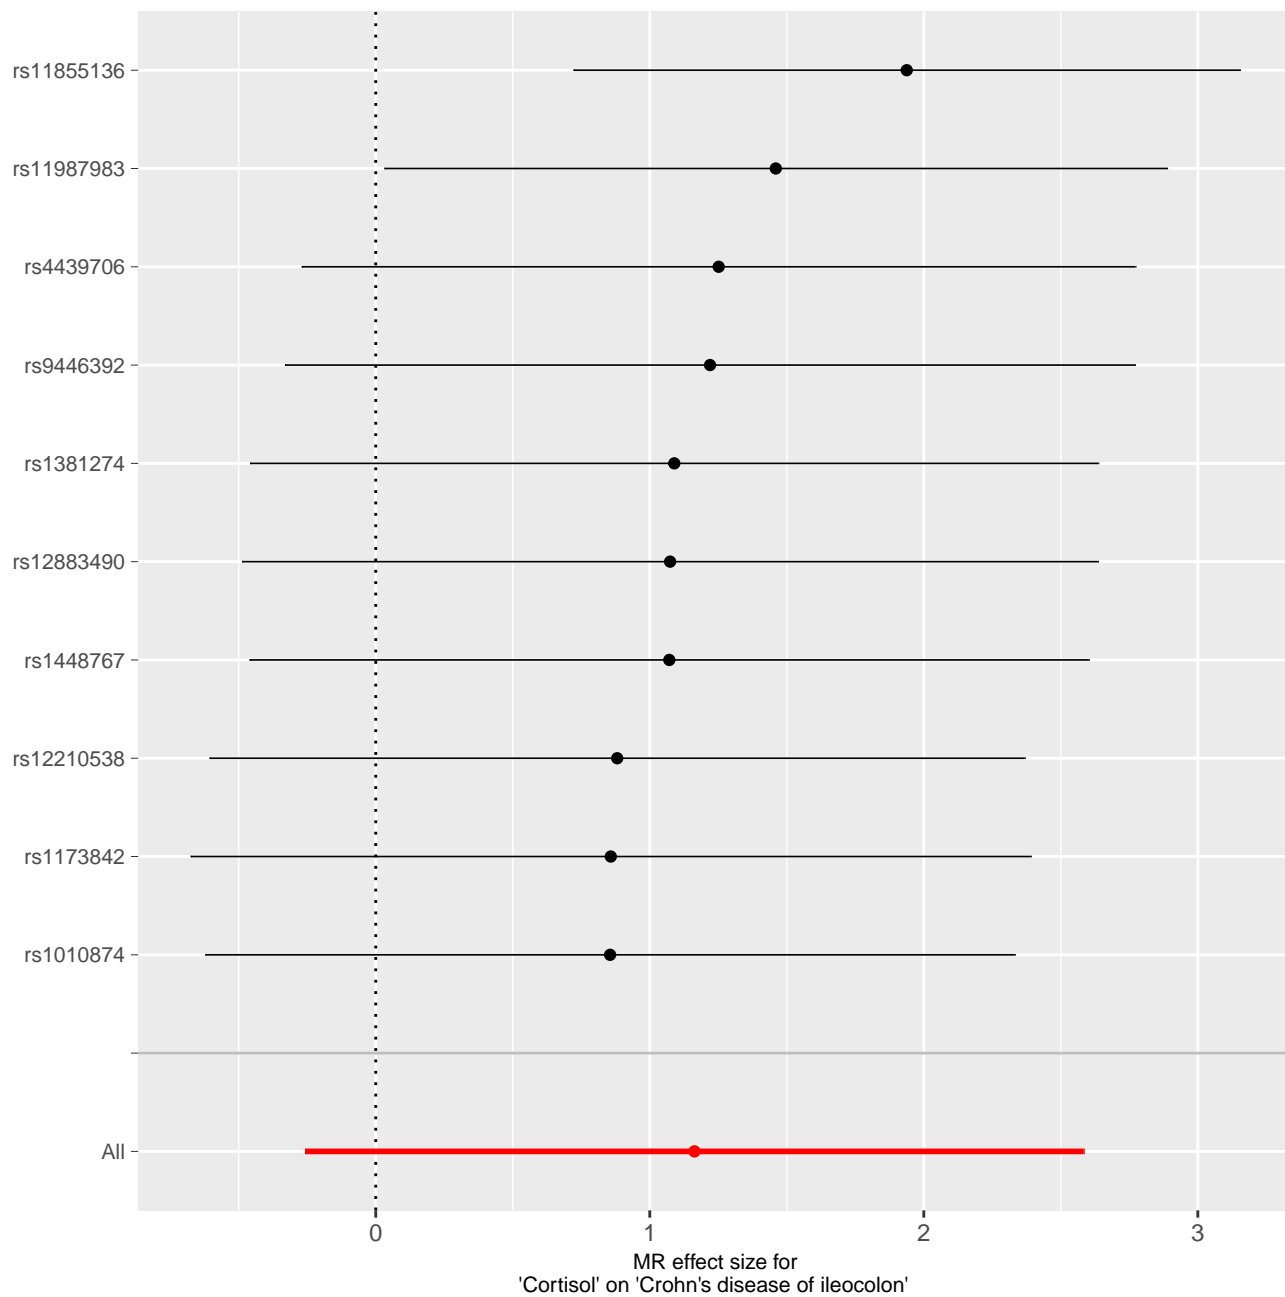

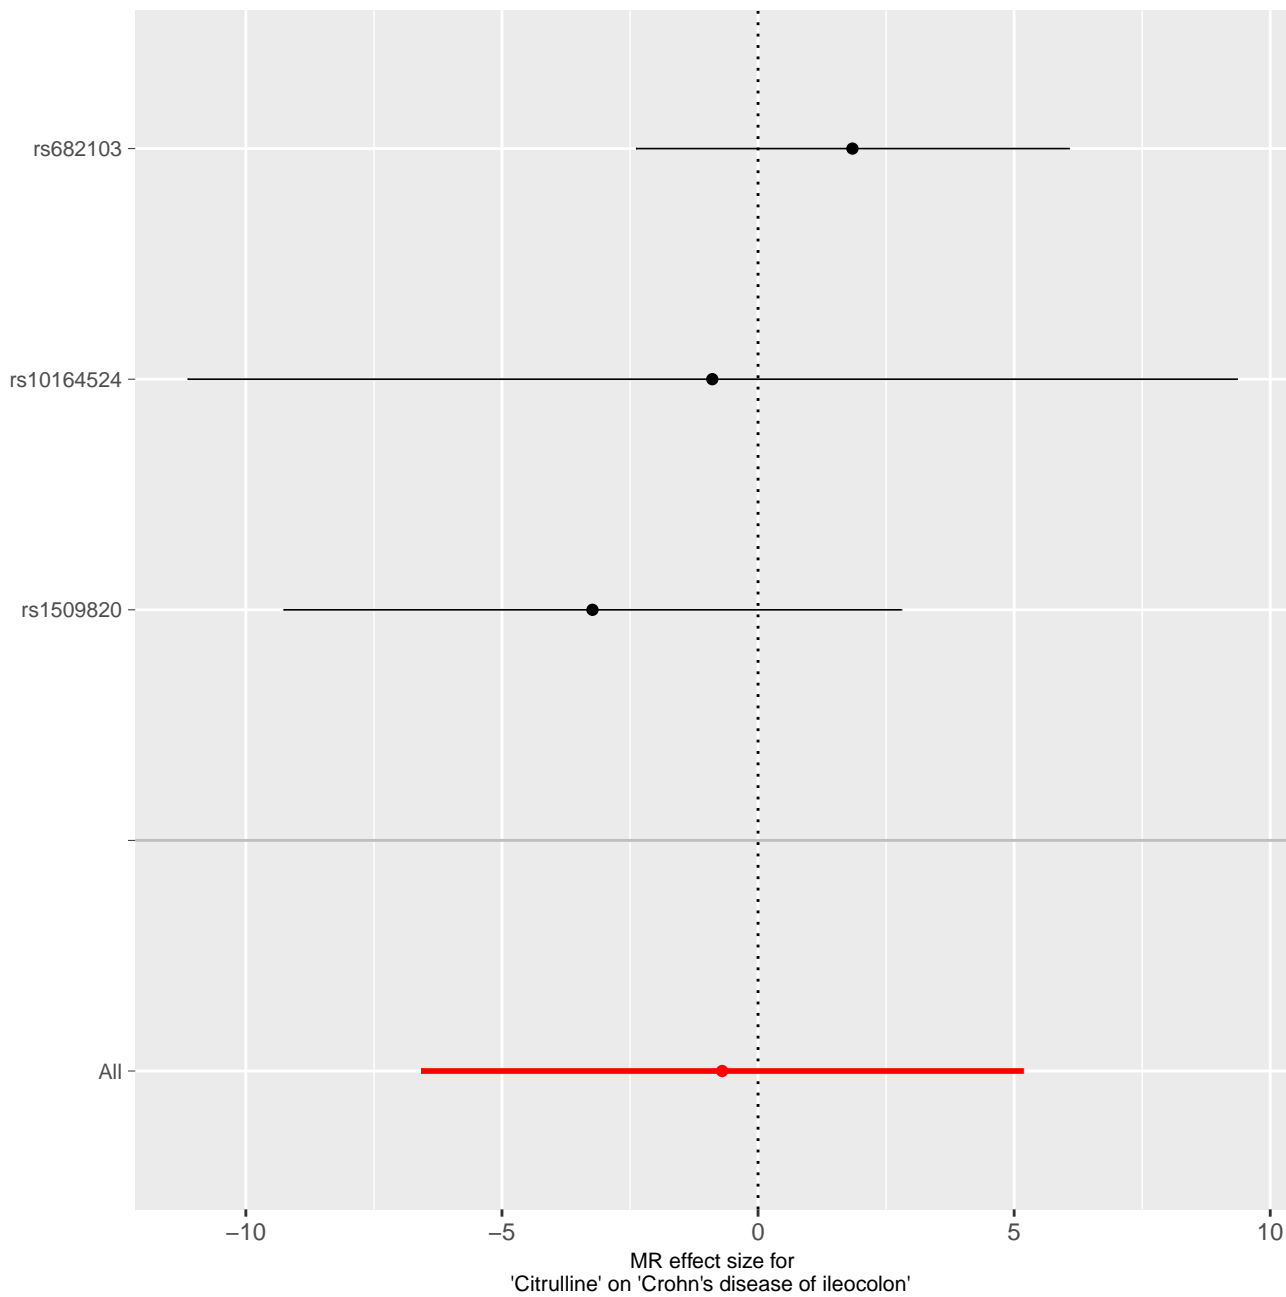

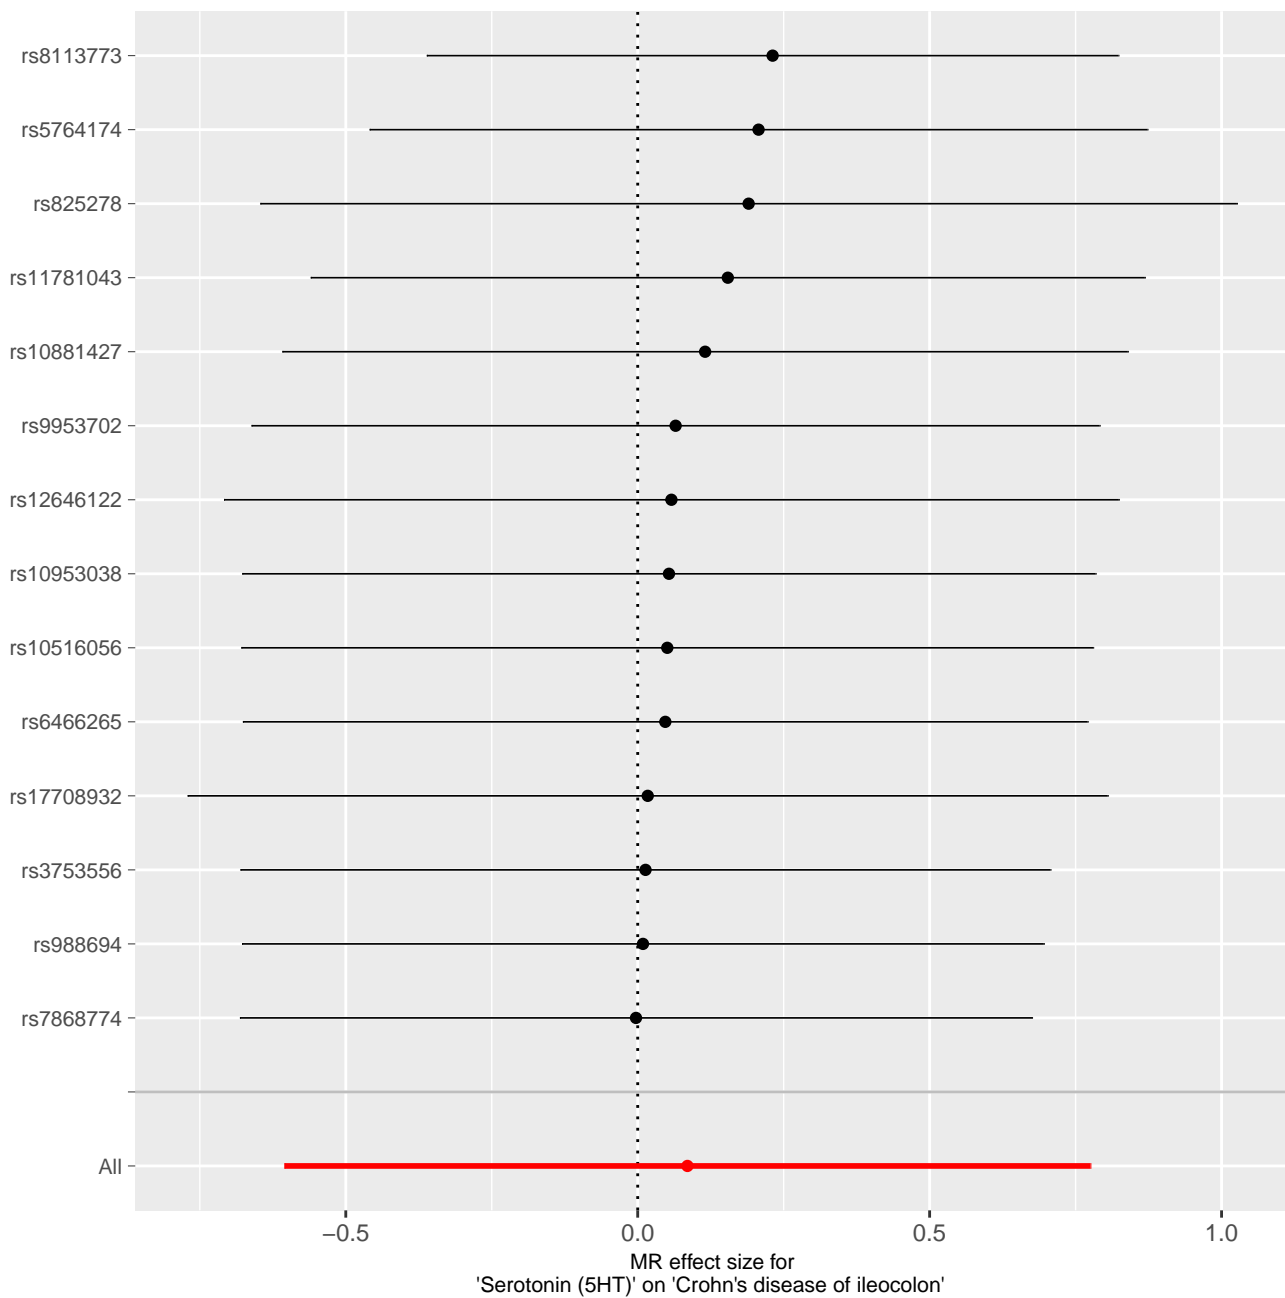

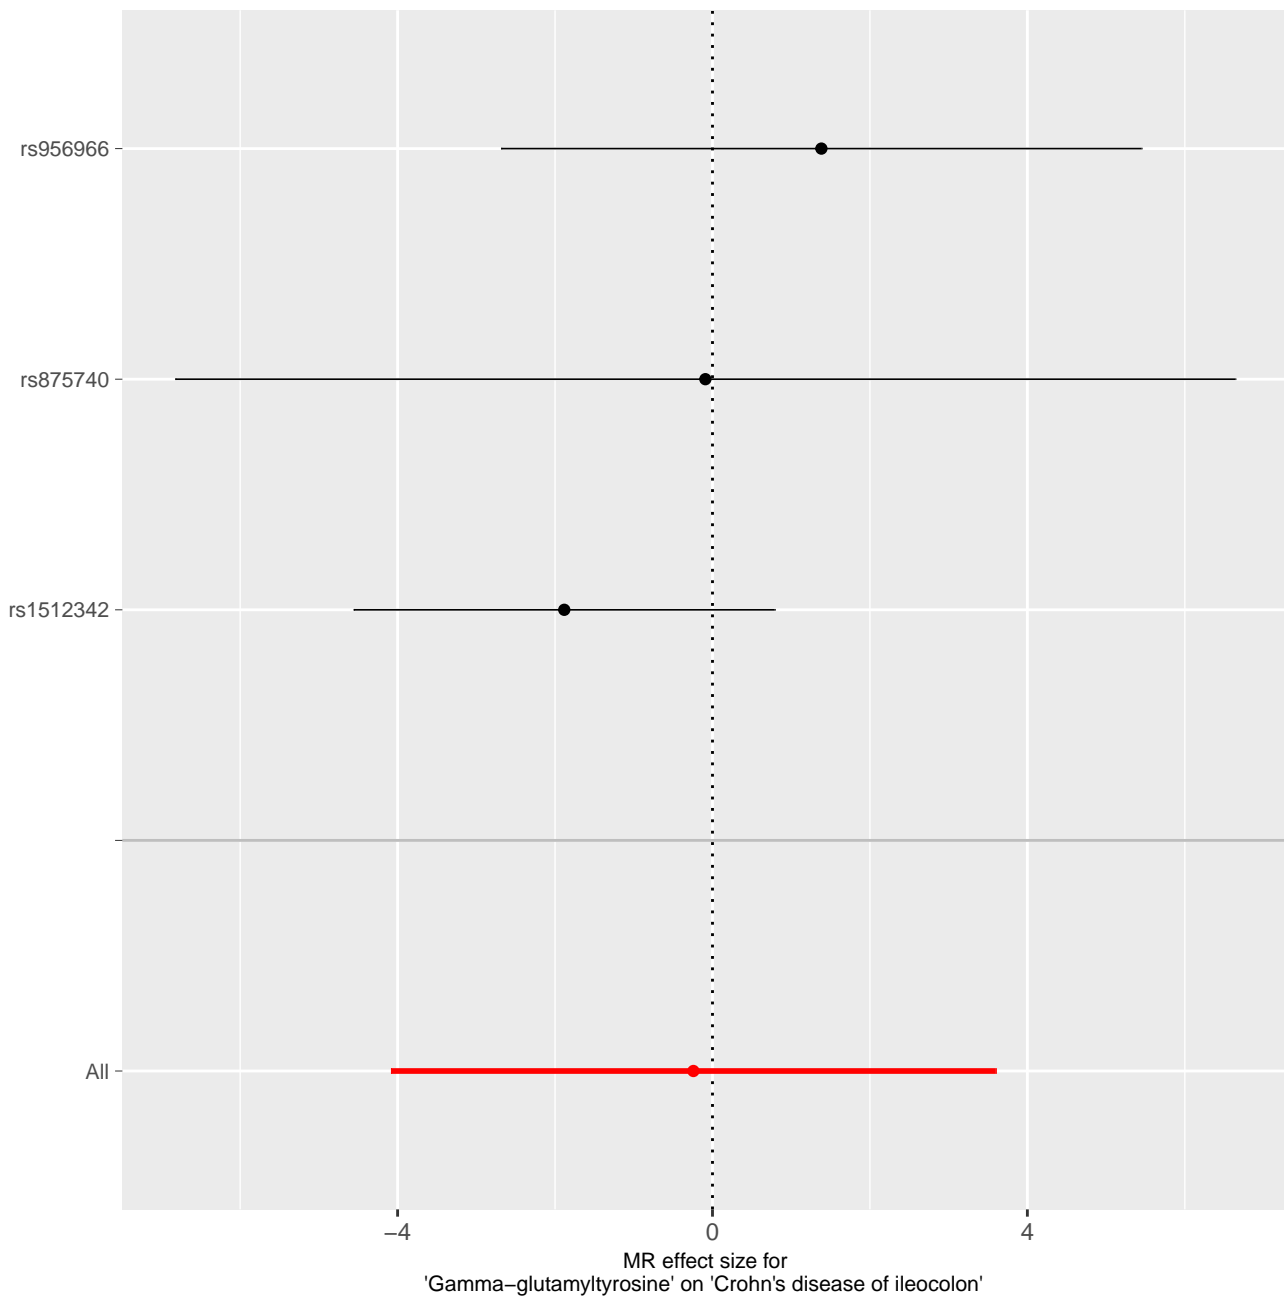

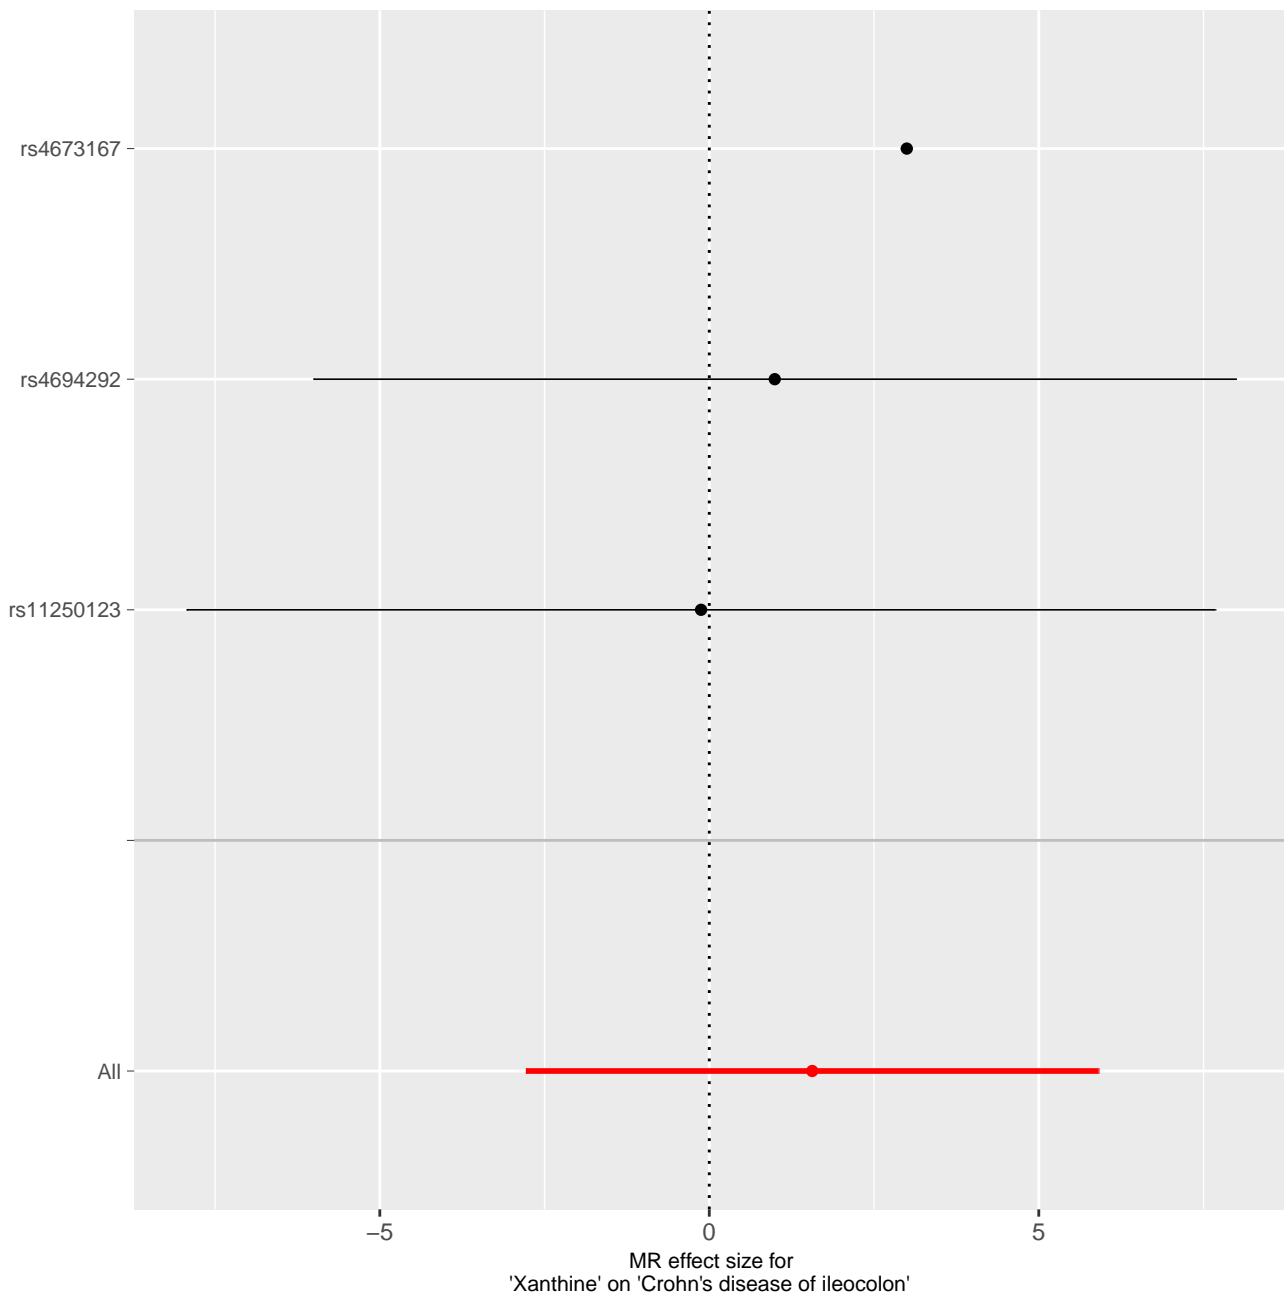

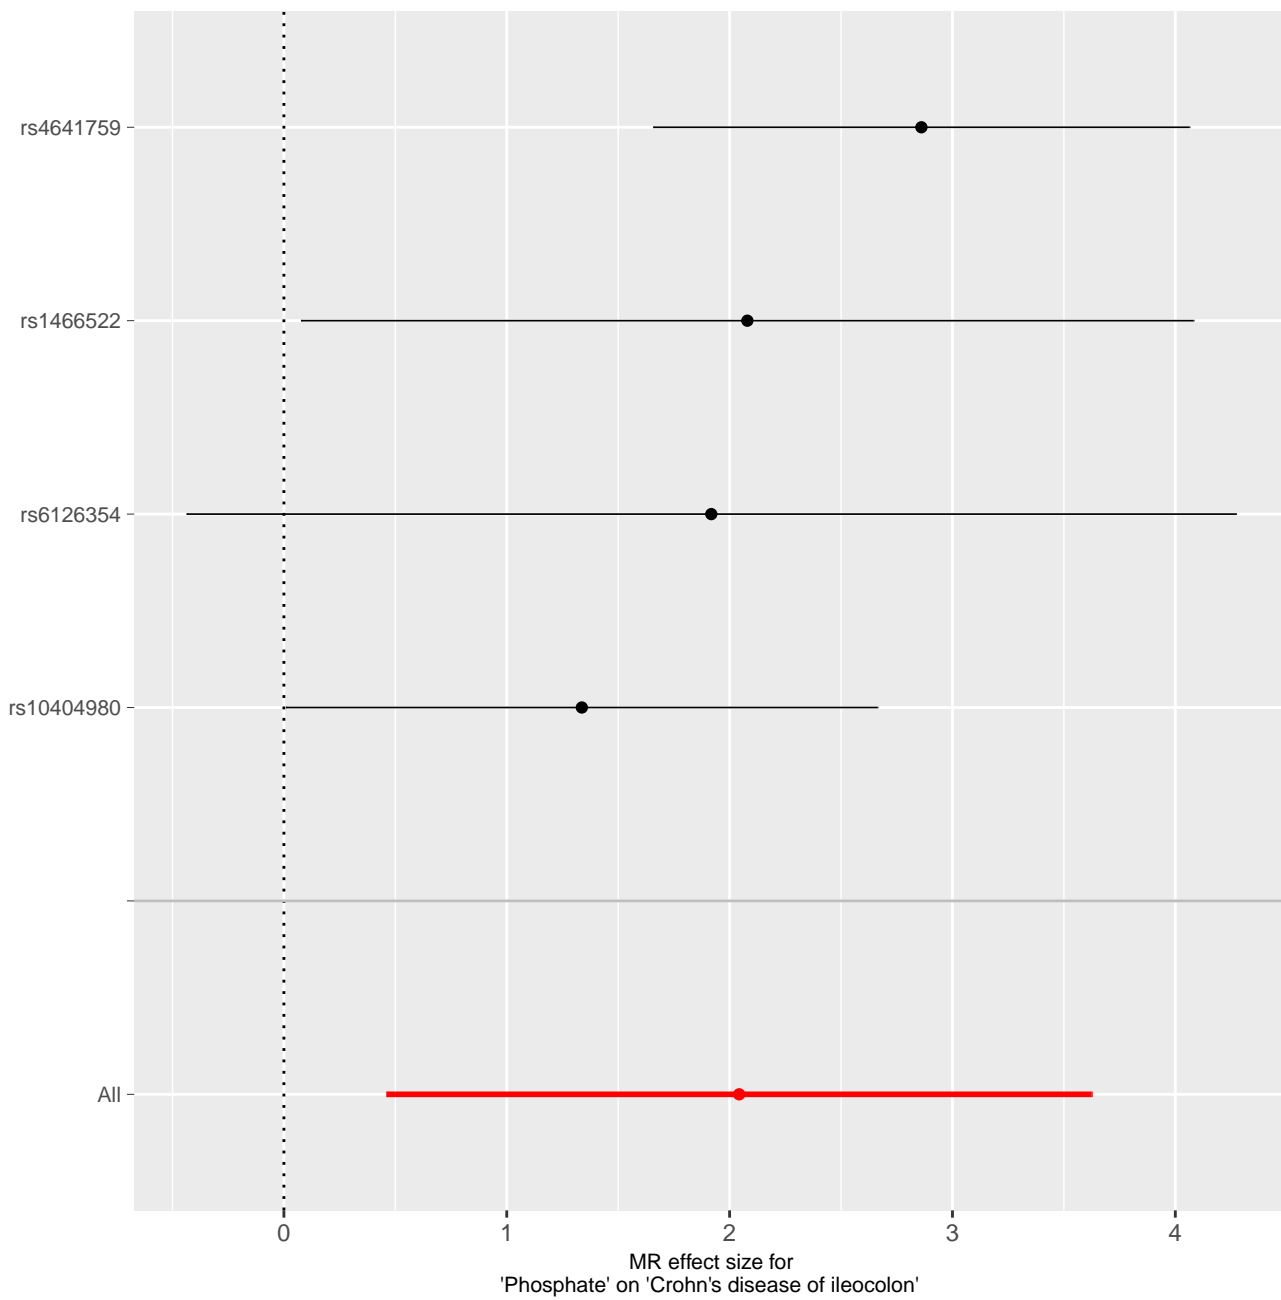

Batch 338 : 3-methoxytyrosine on Crohn's disease of ileocolon

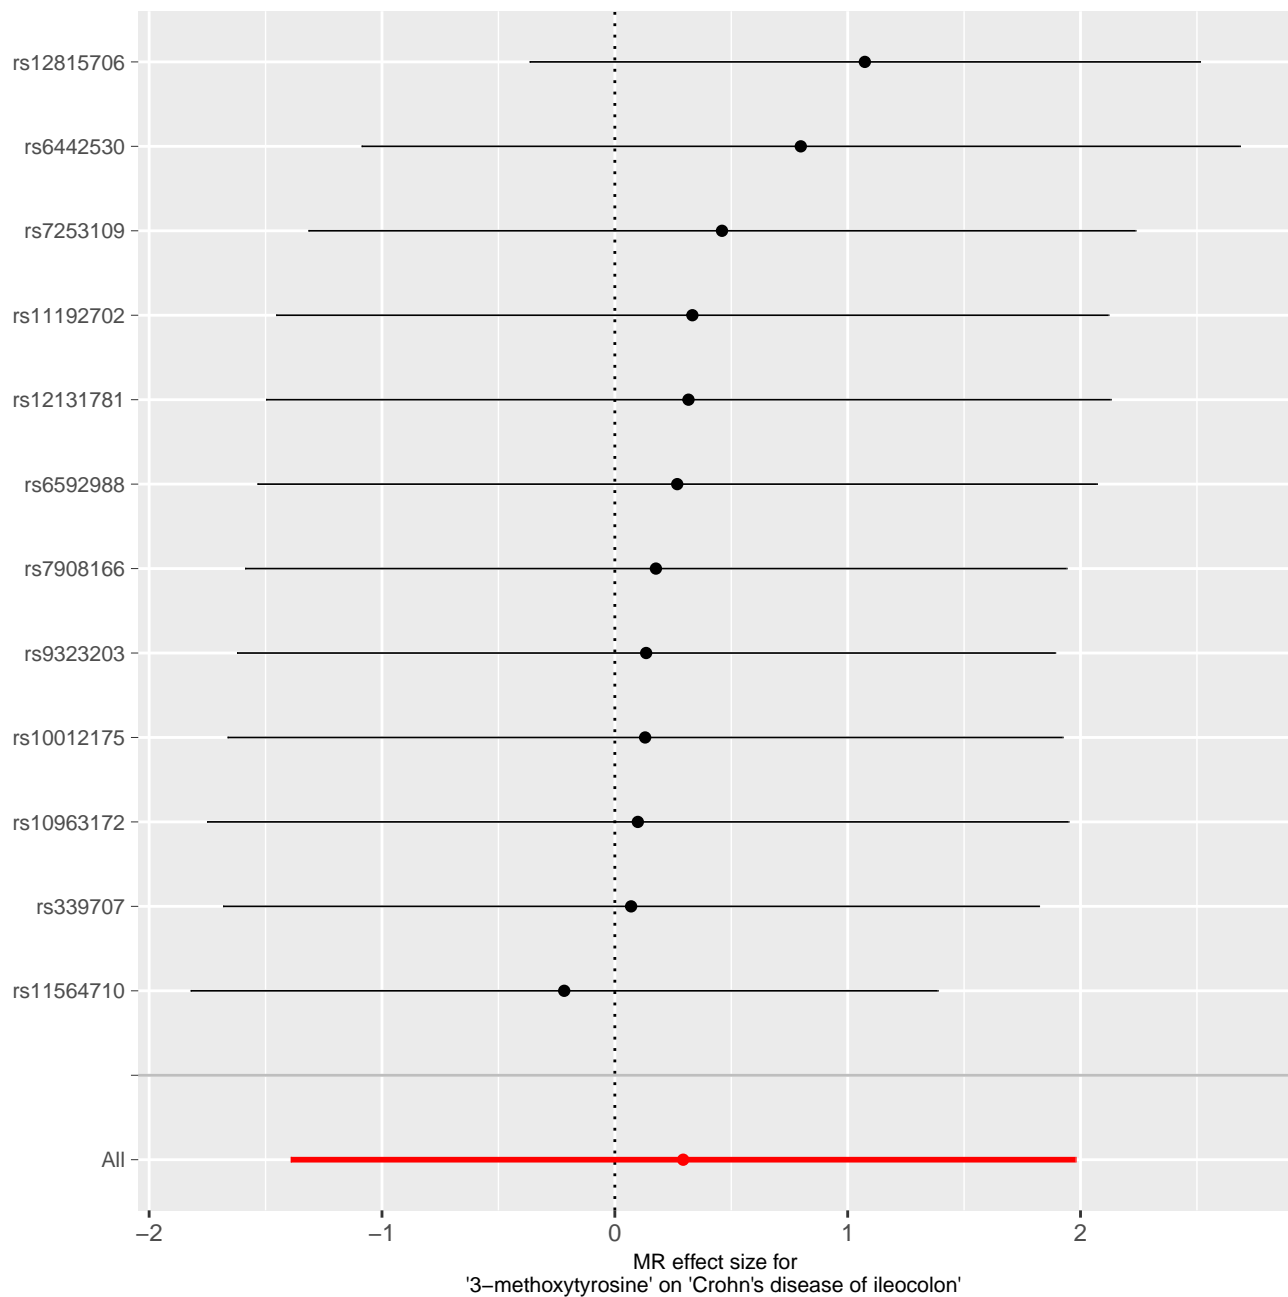



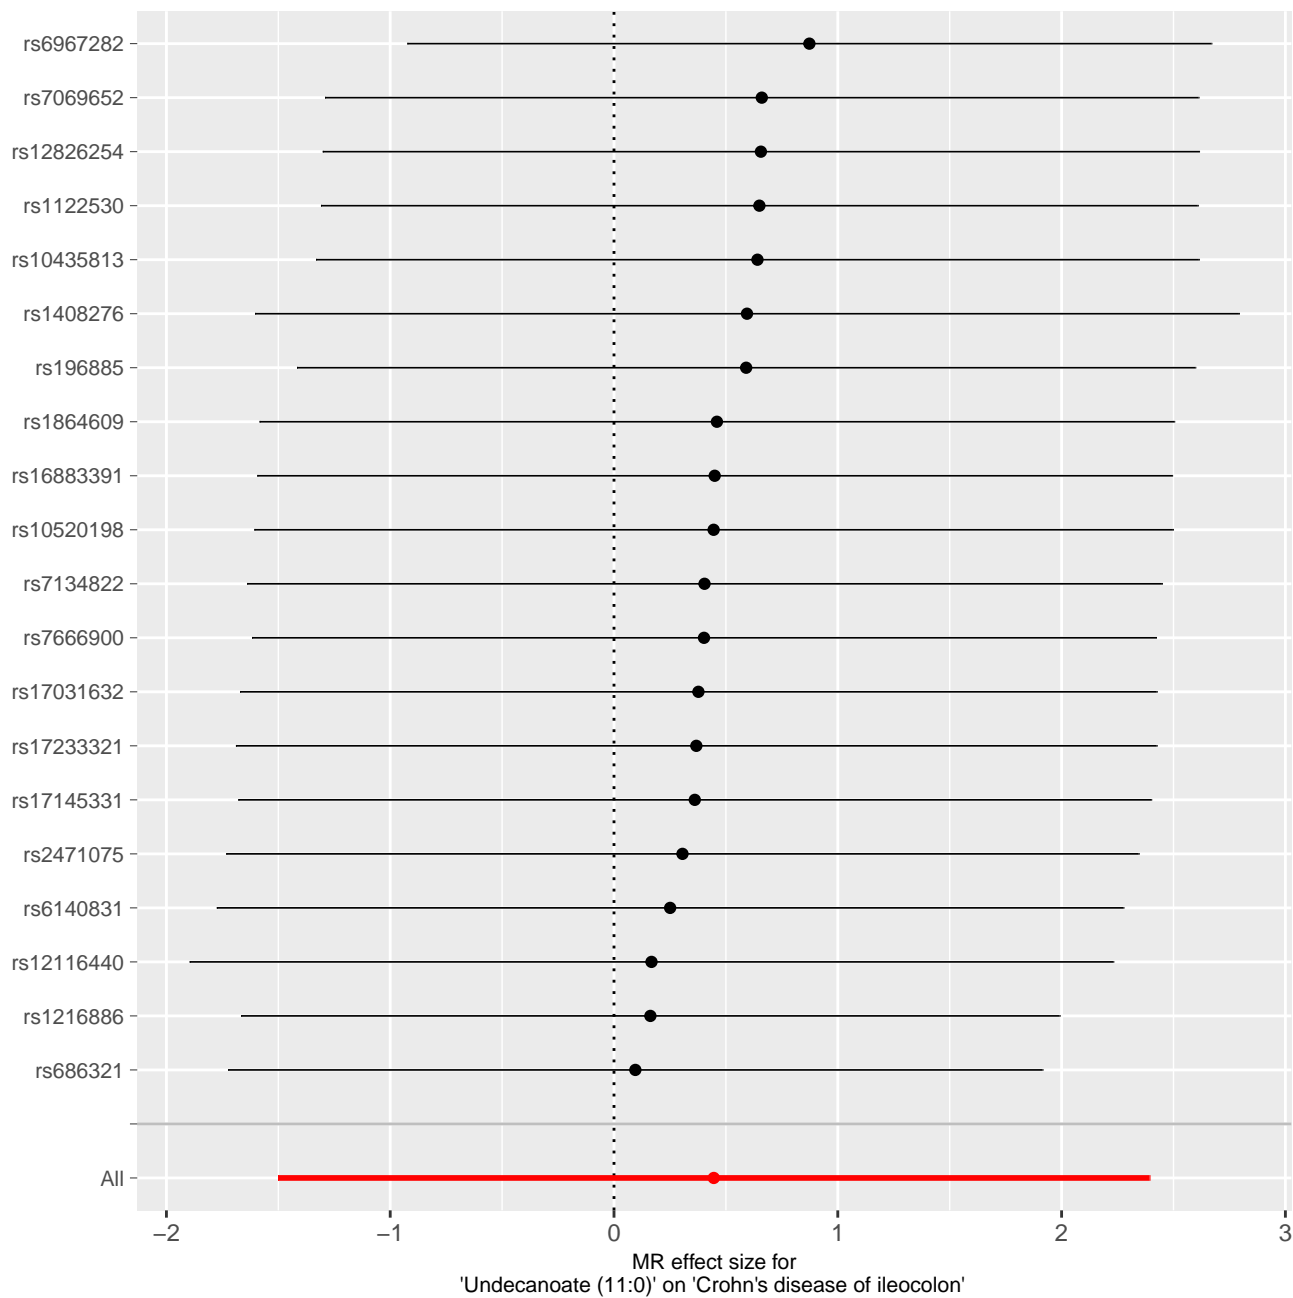

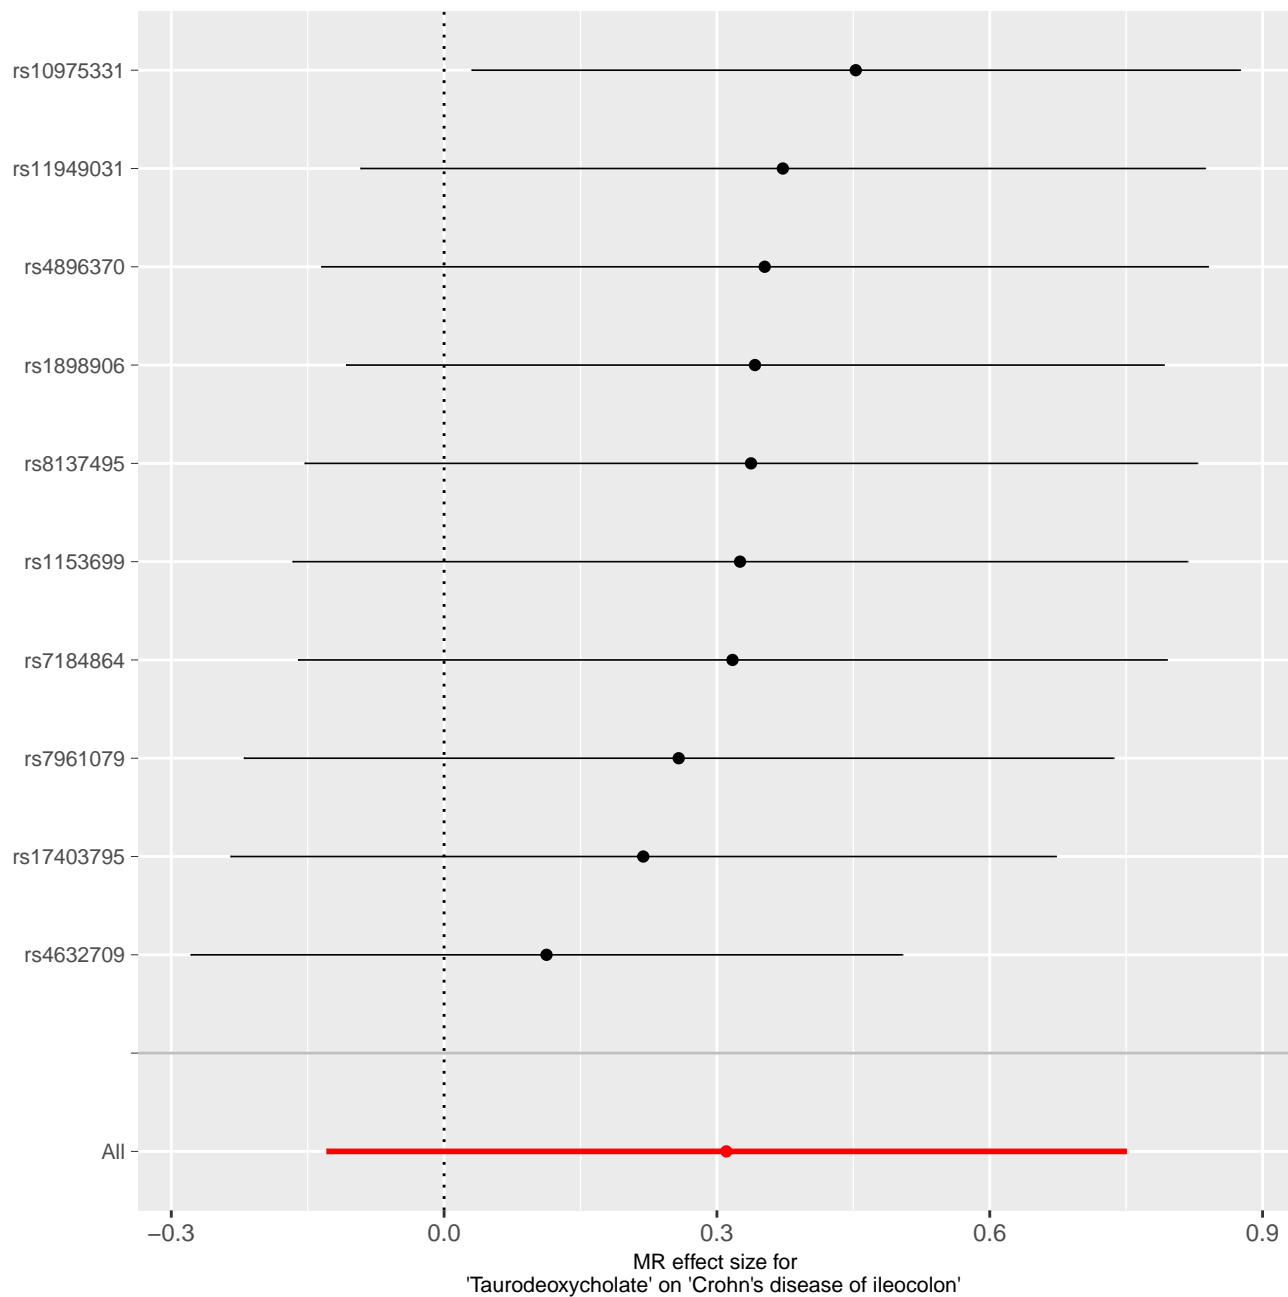

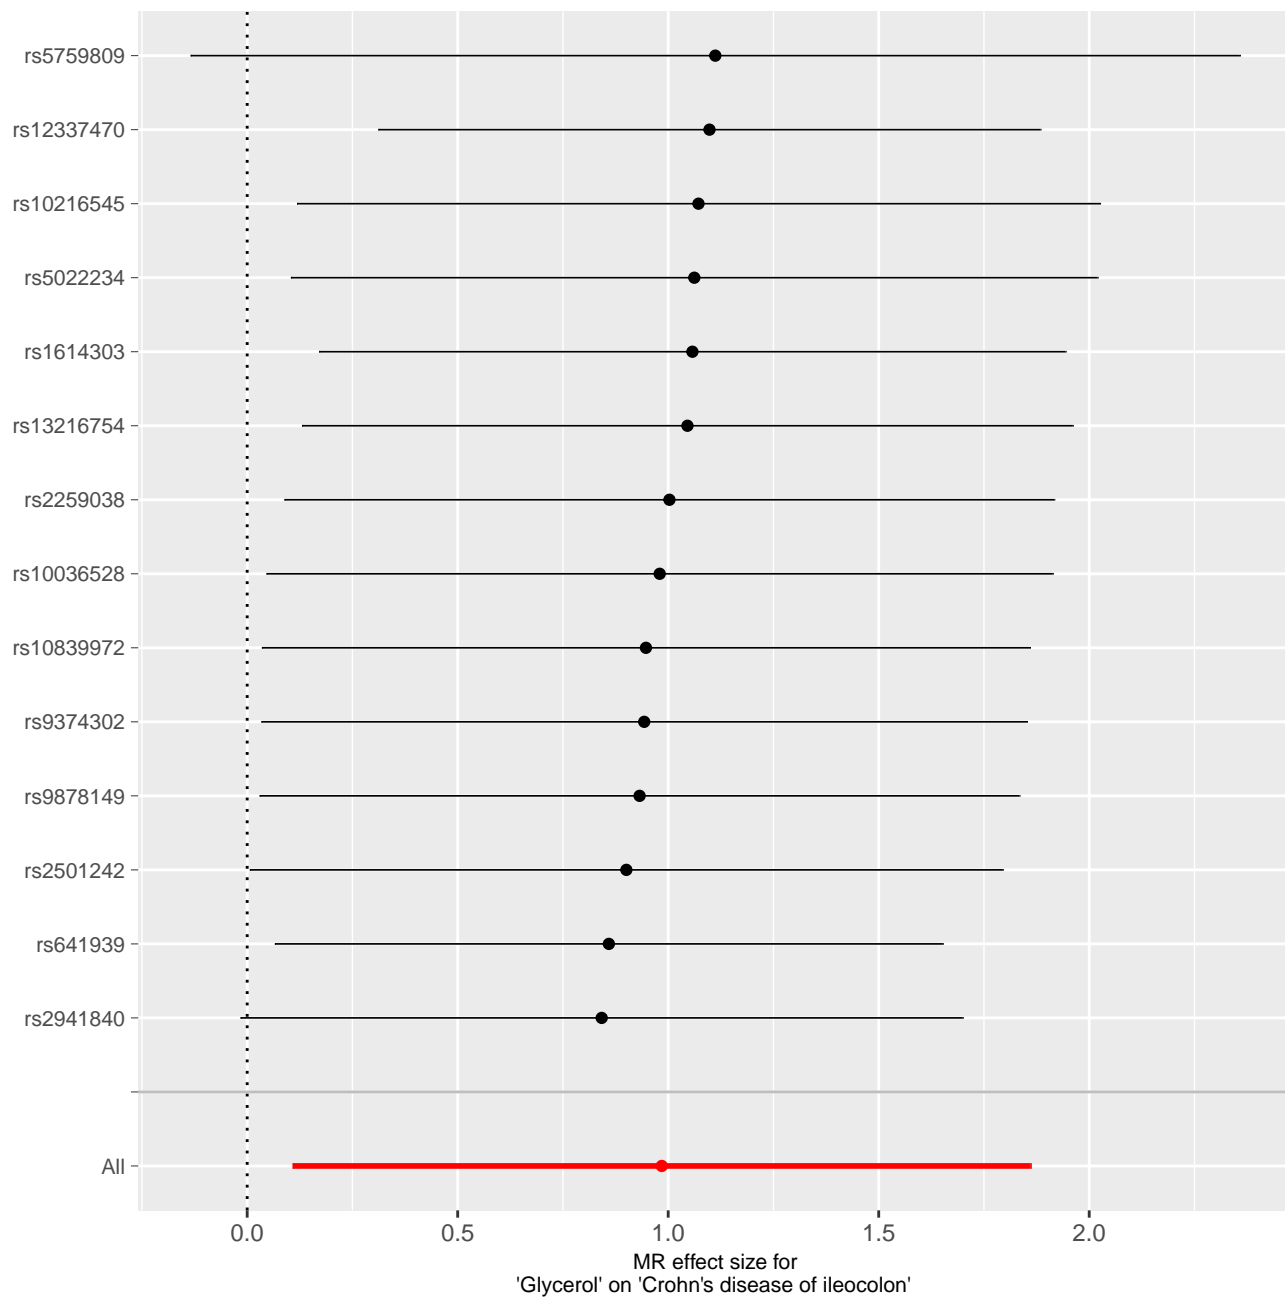

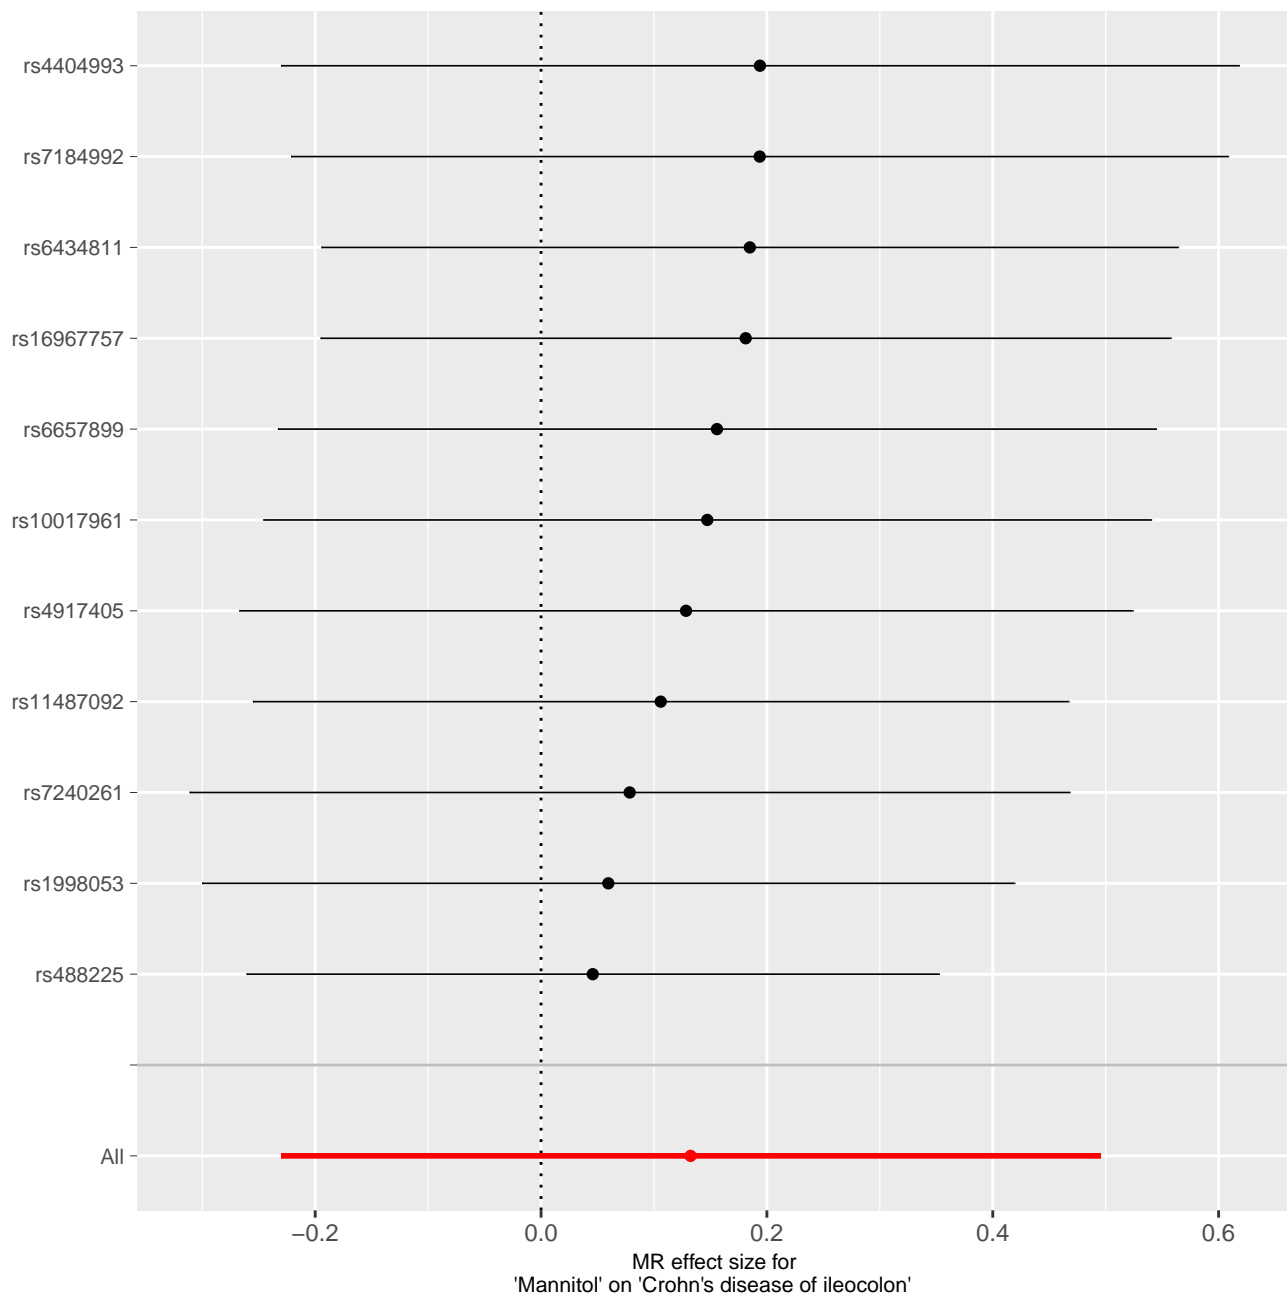

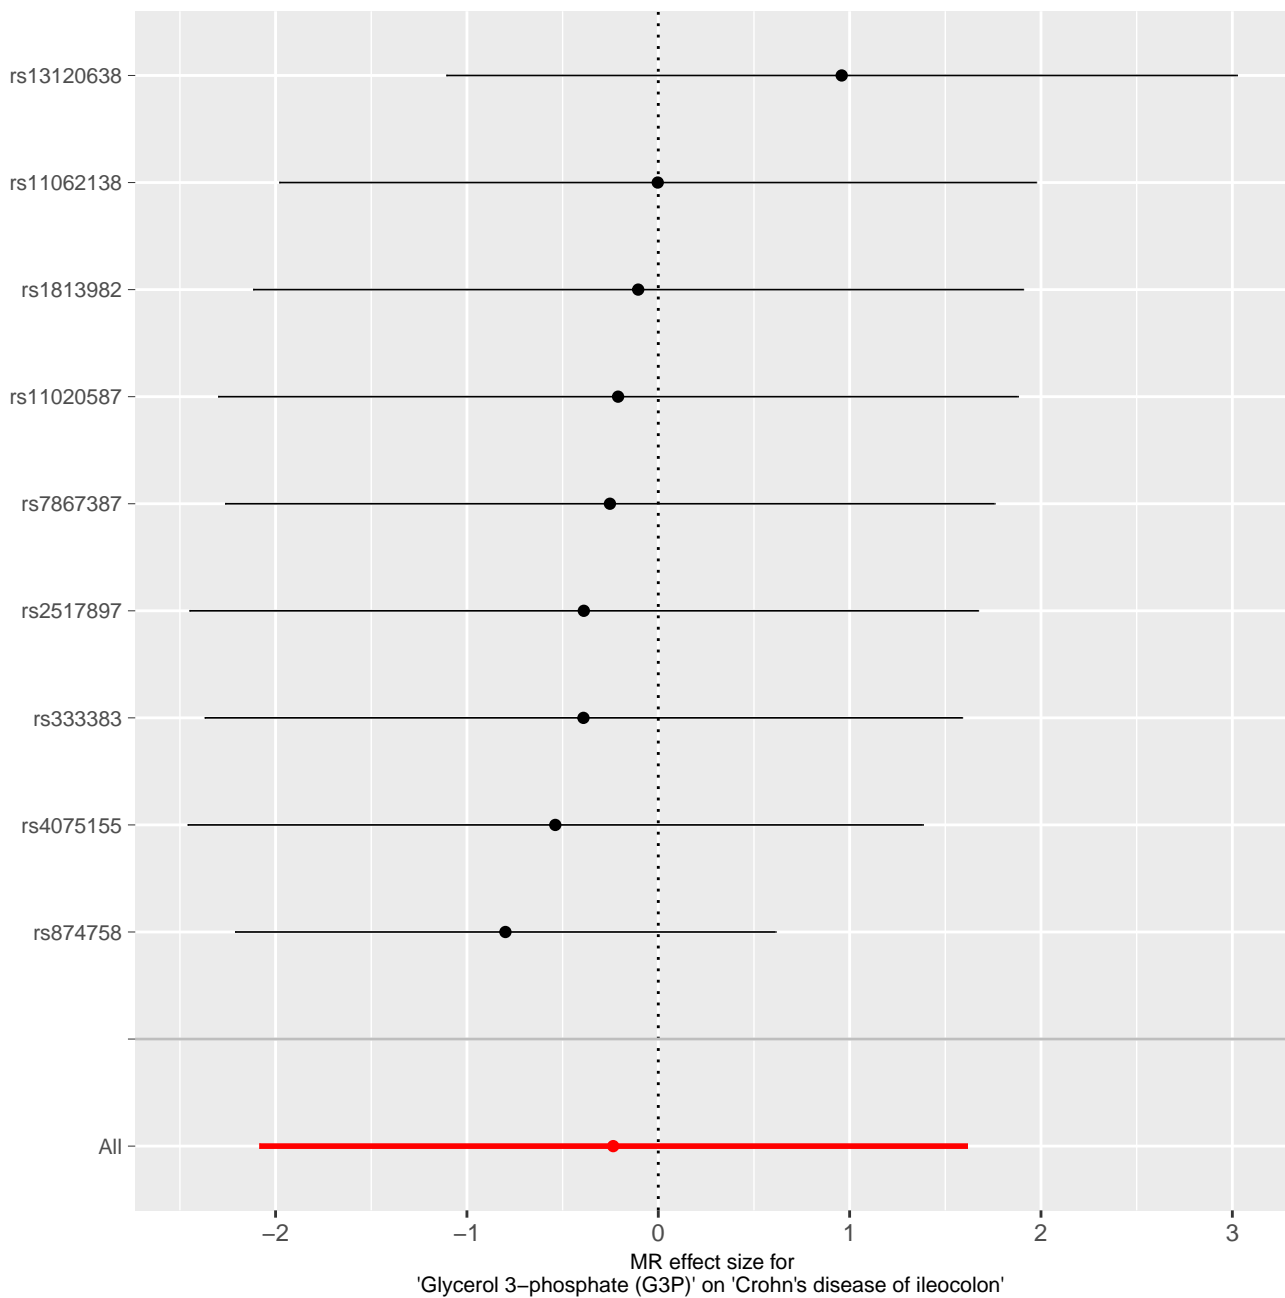

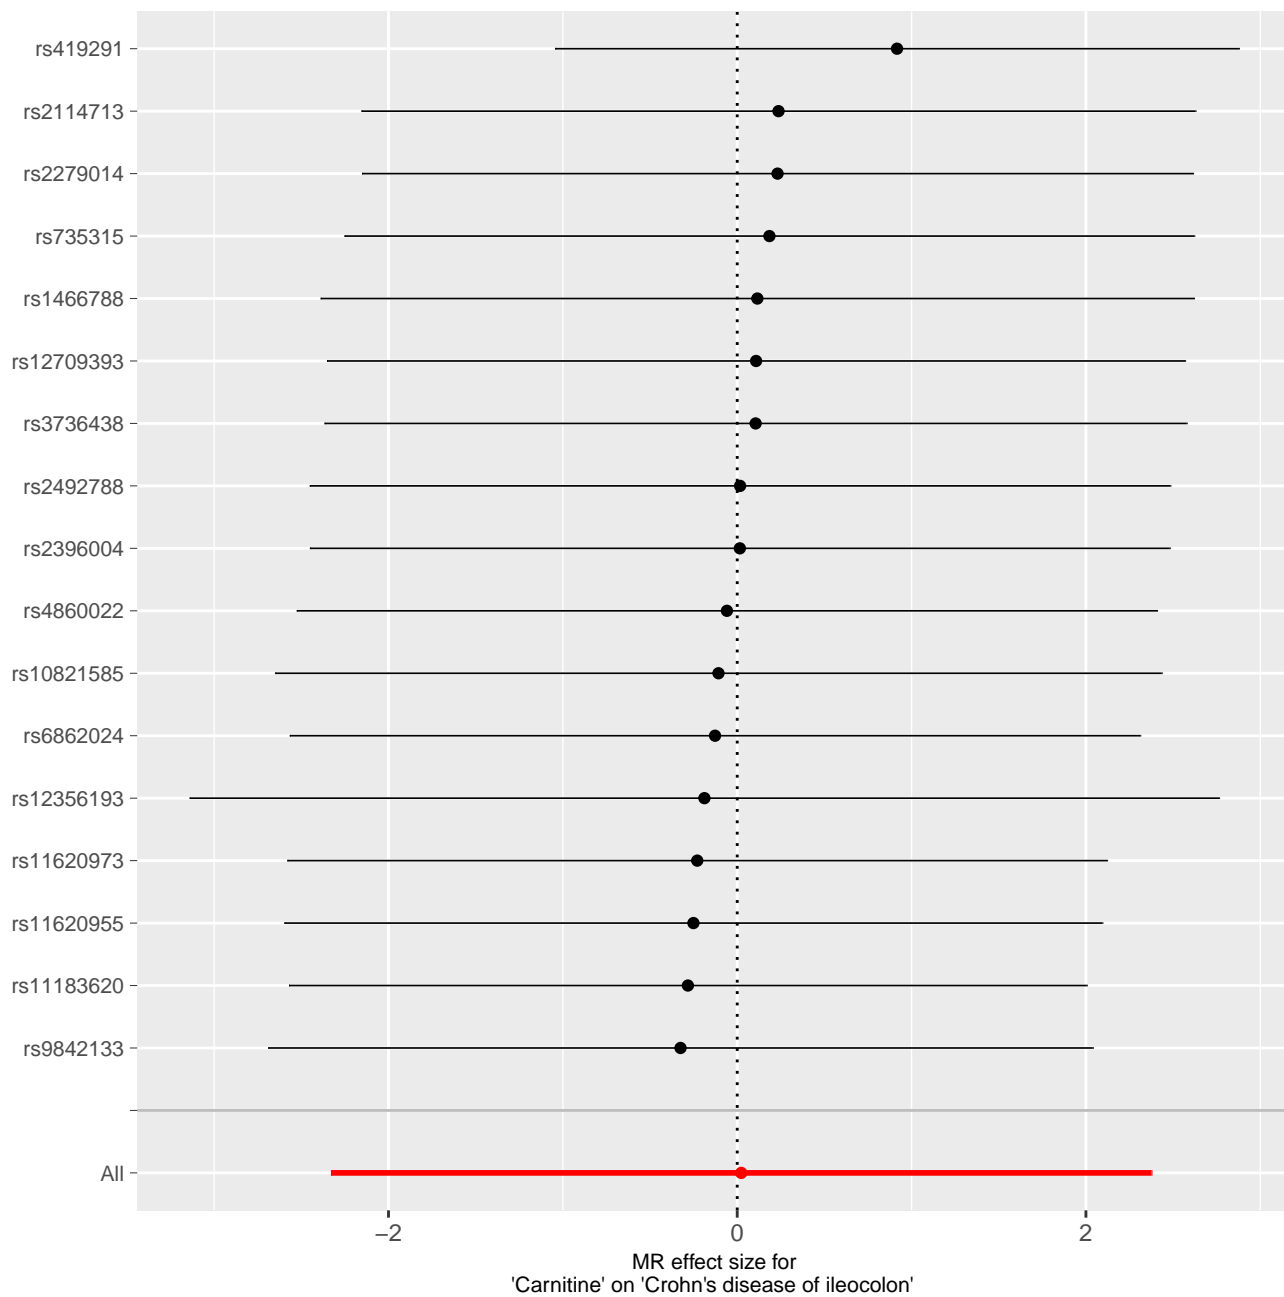

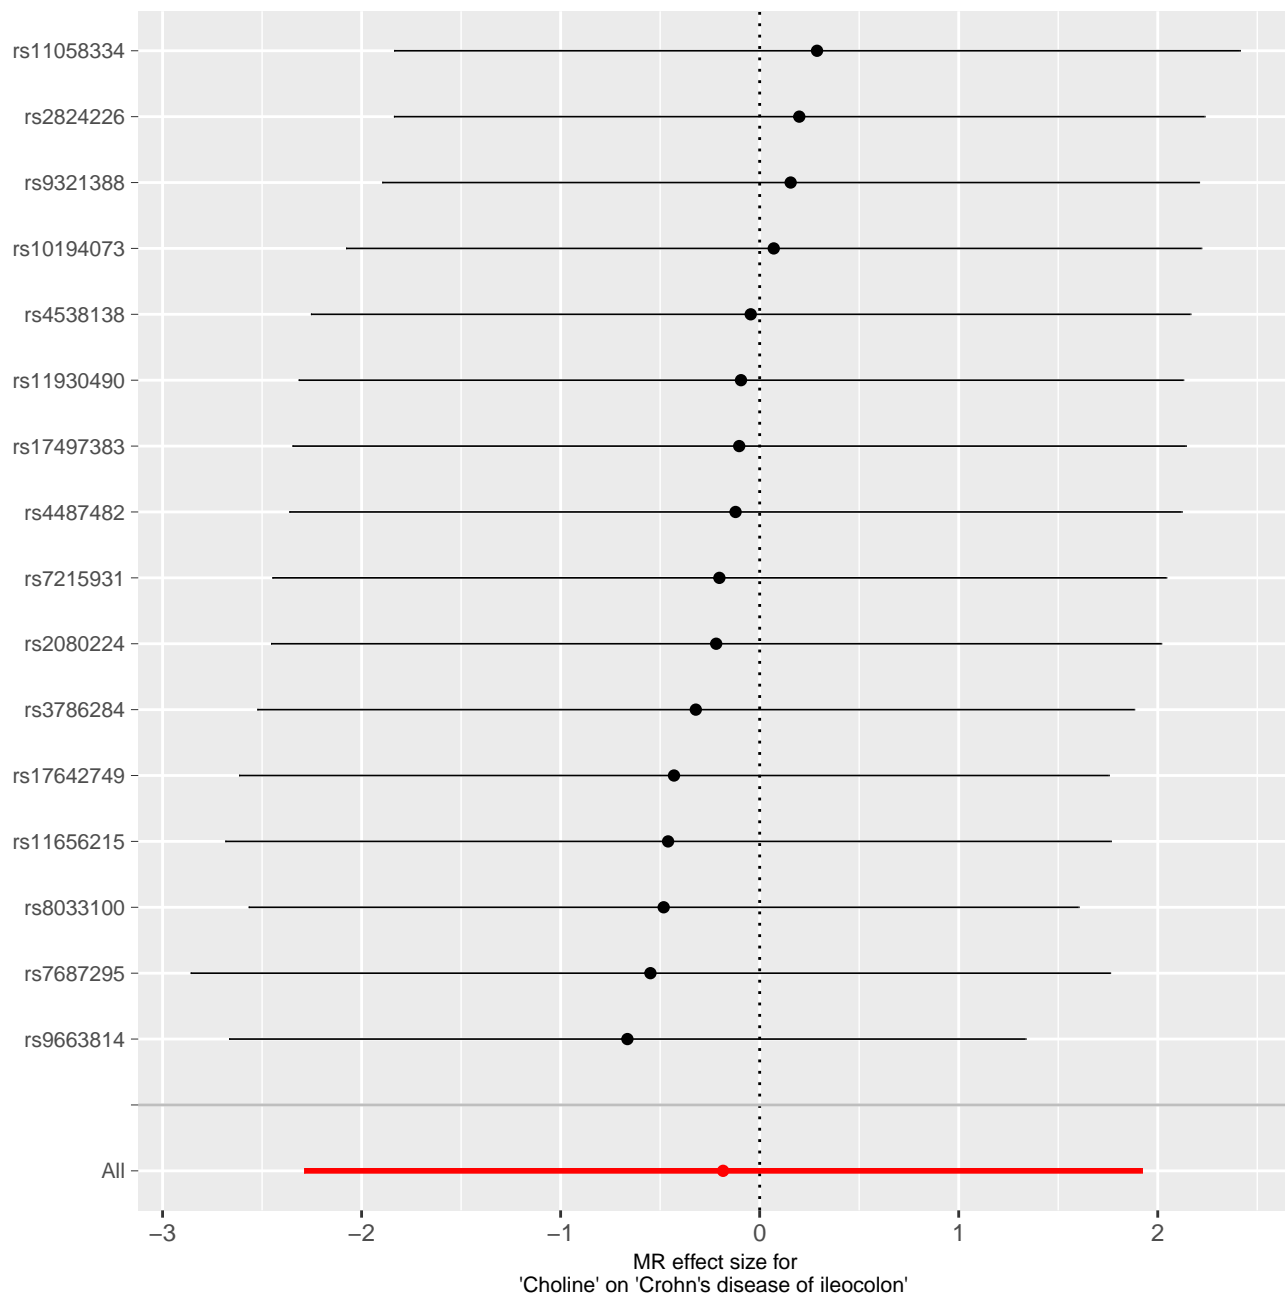

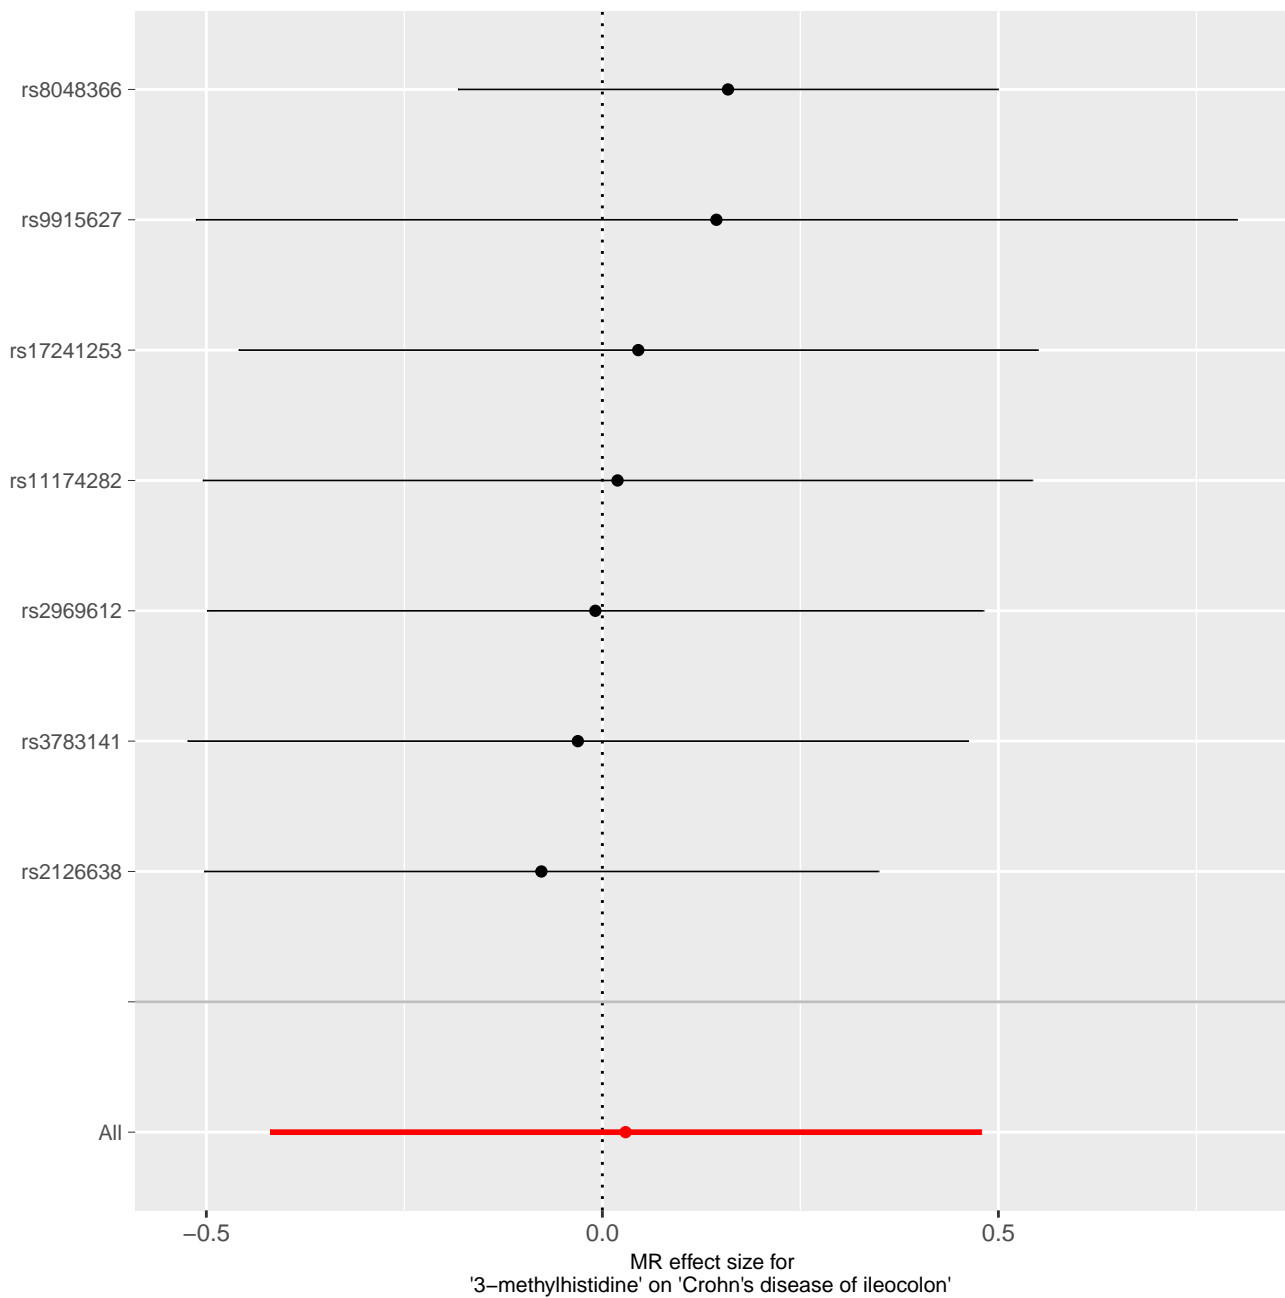



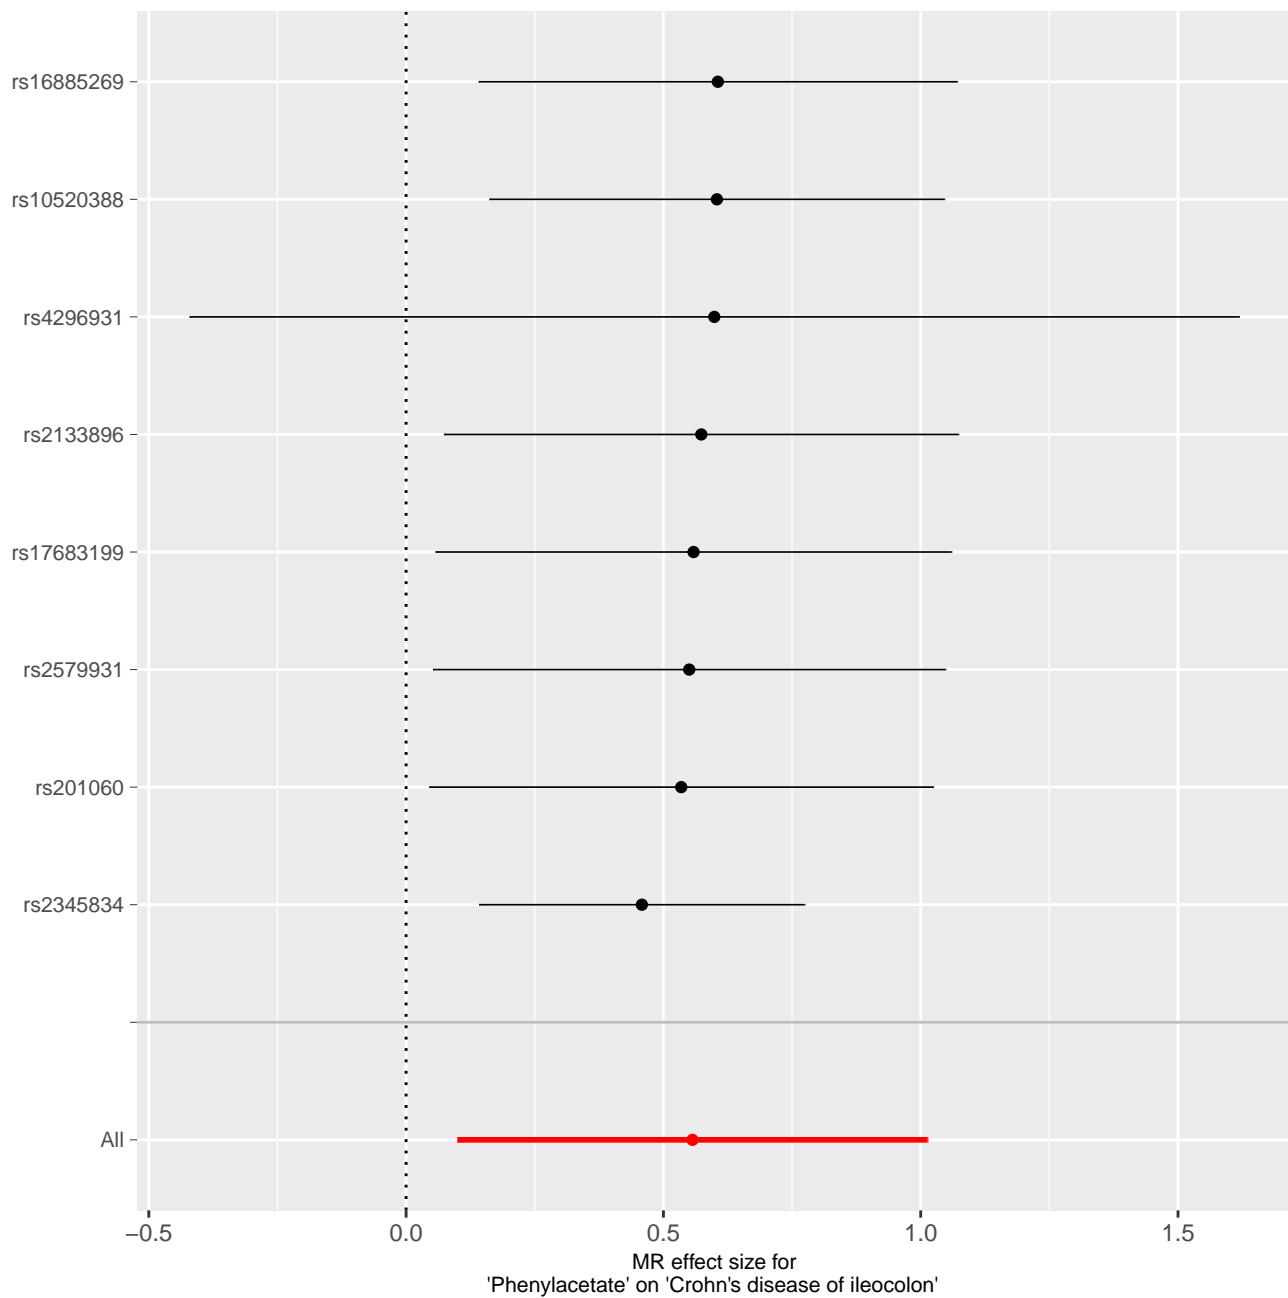

Batch 356 : Glycerophosphorylcholine (GPC) on Crohn's disease of ileocolon

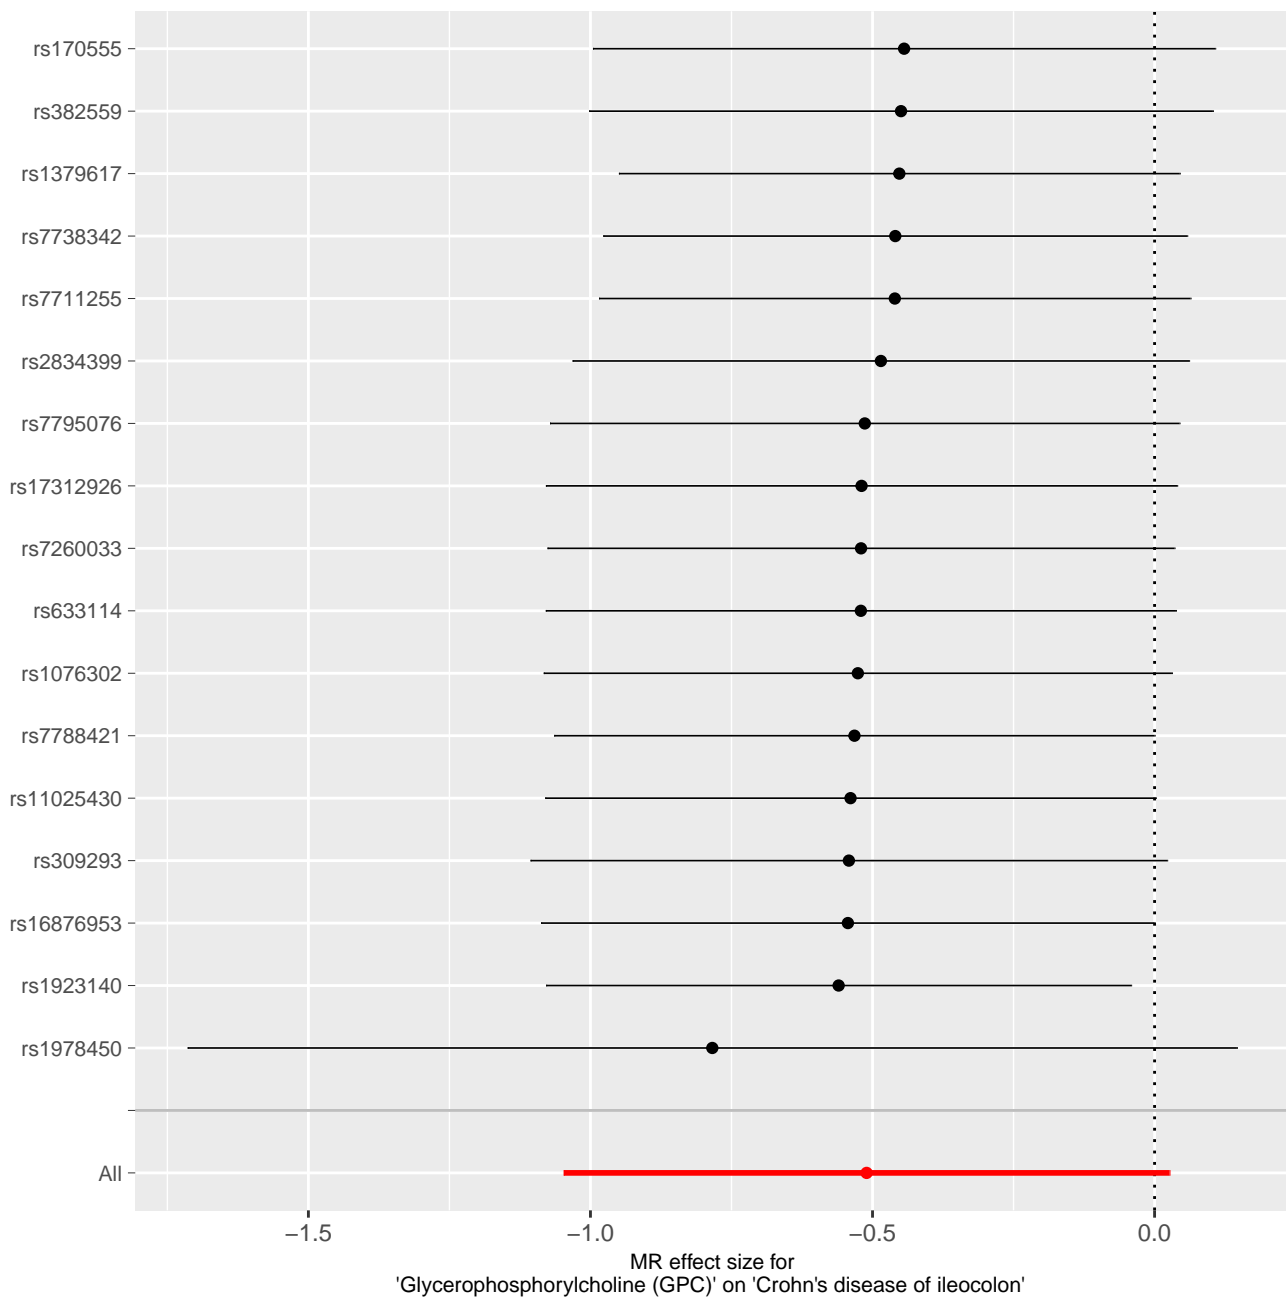

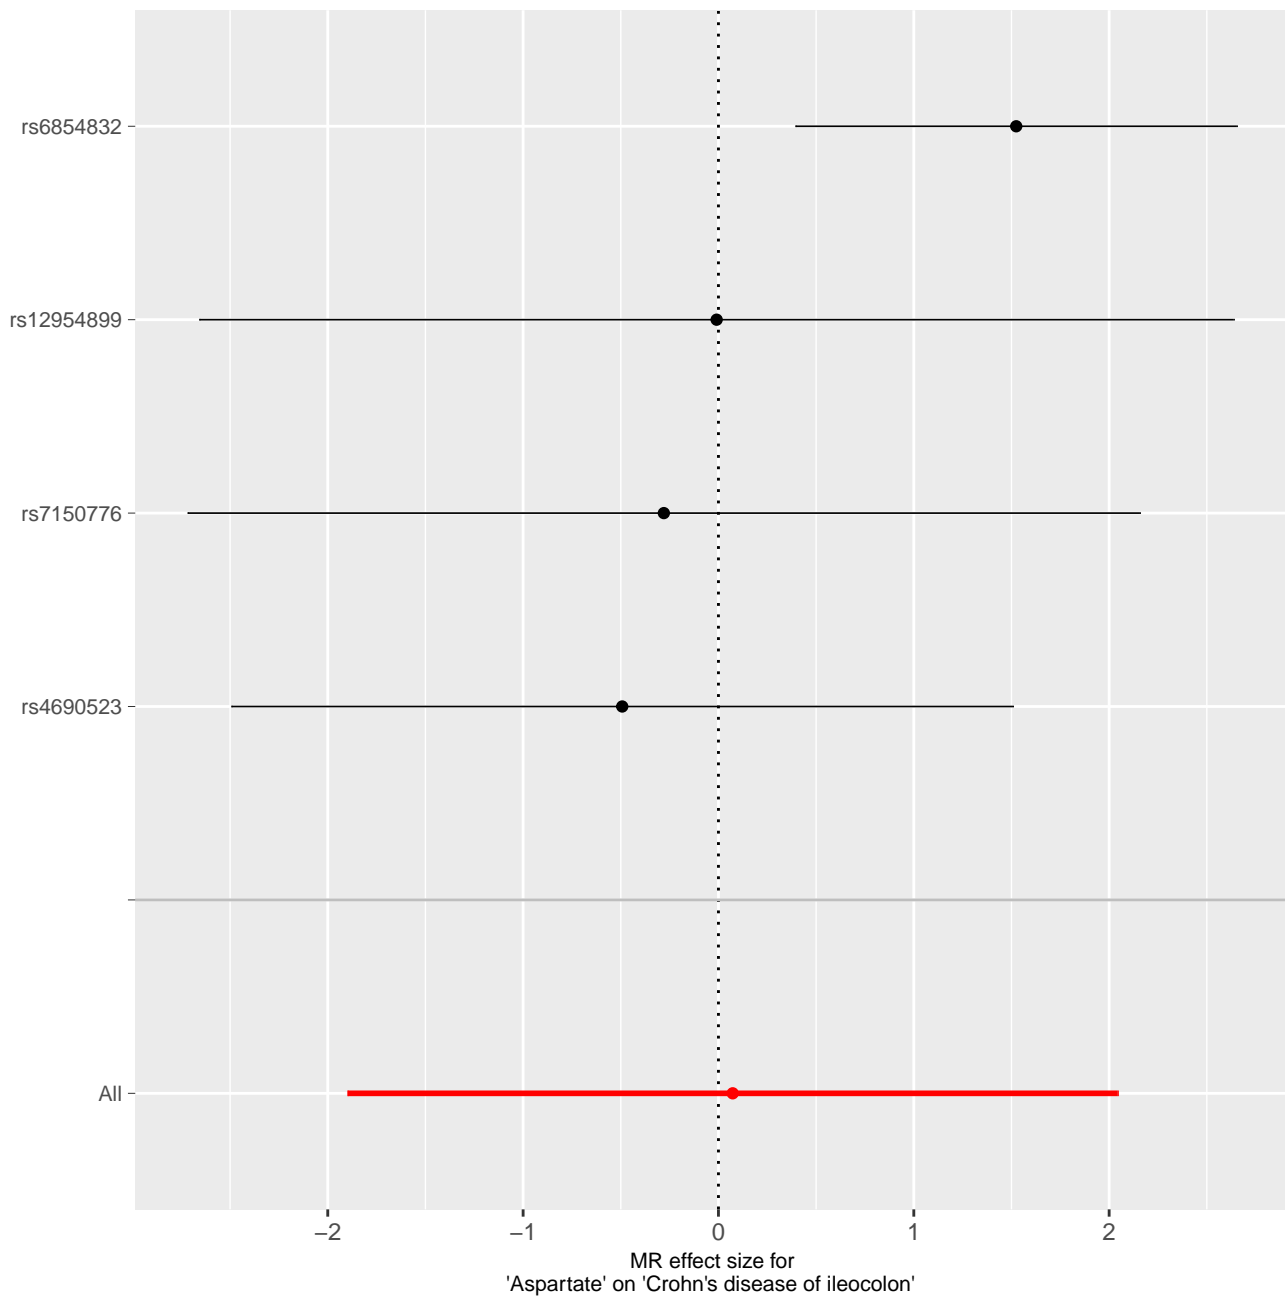

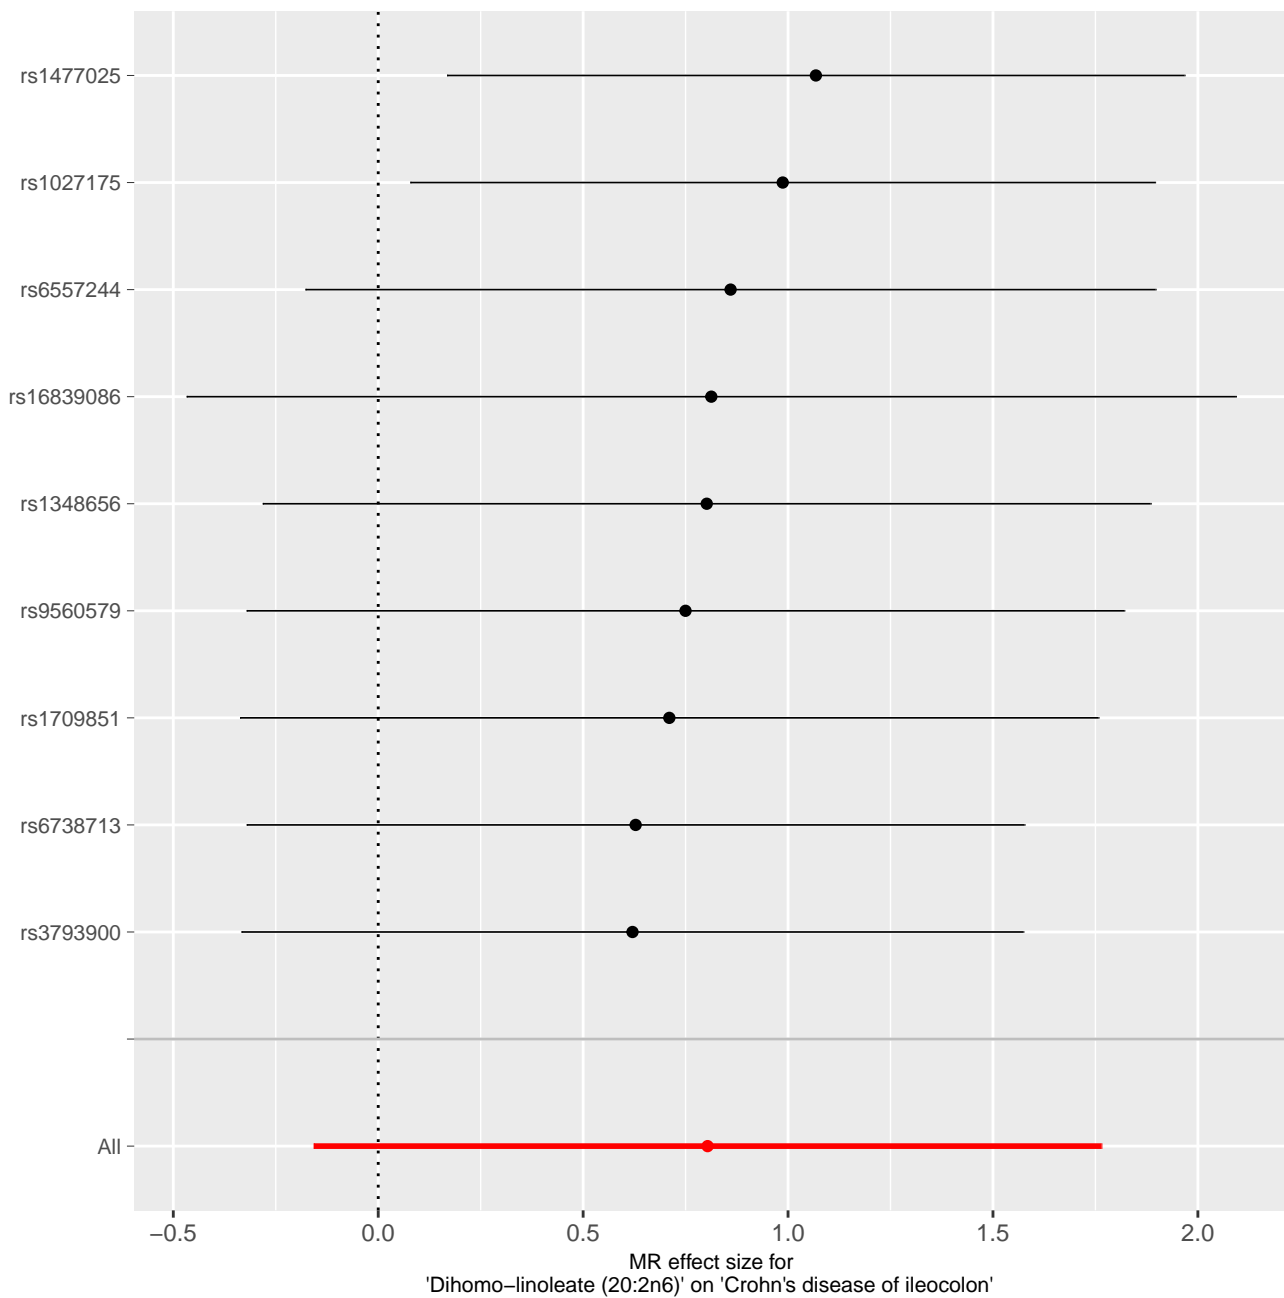

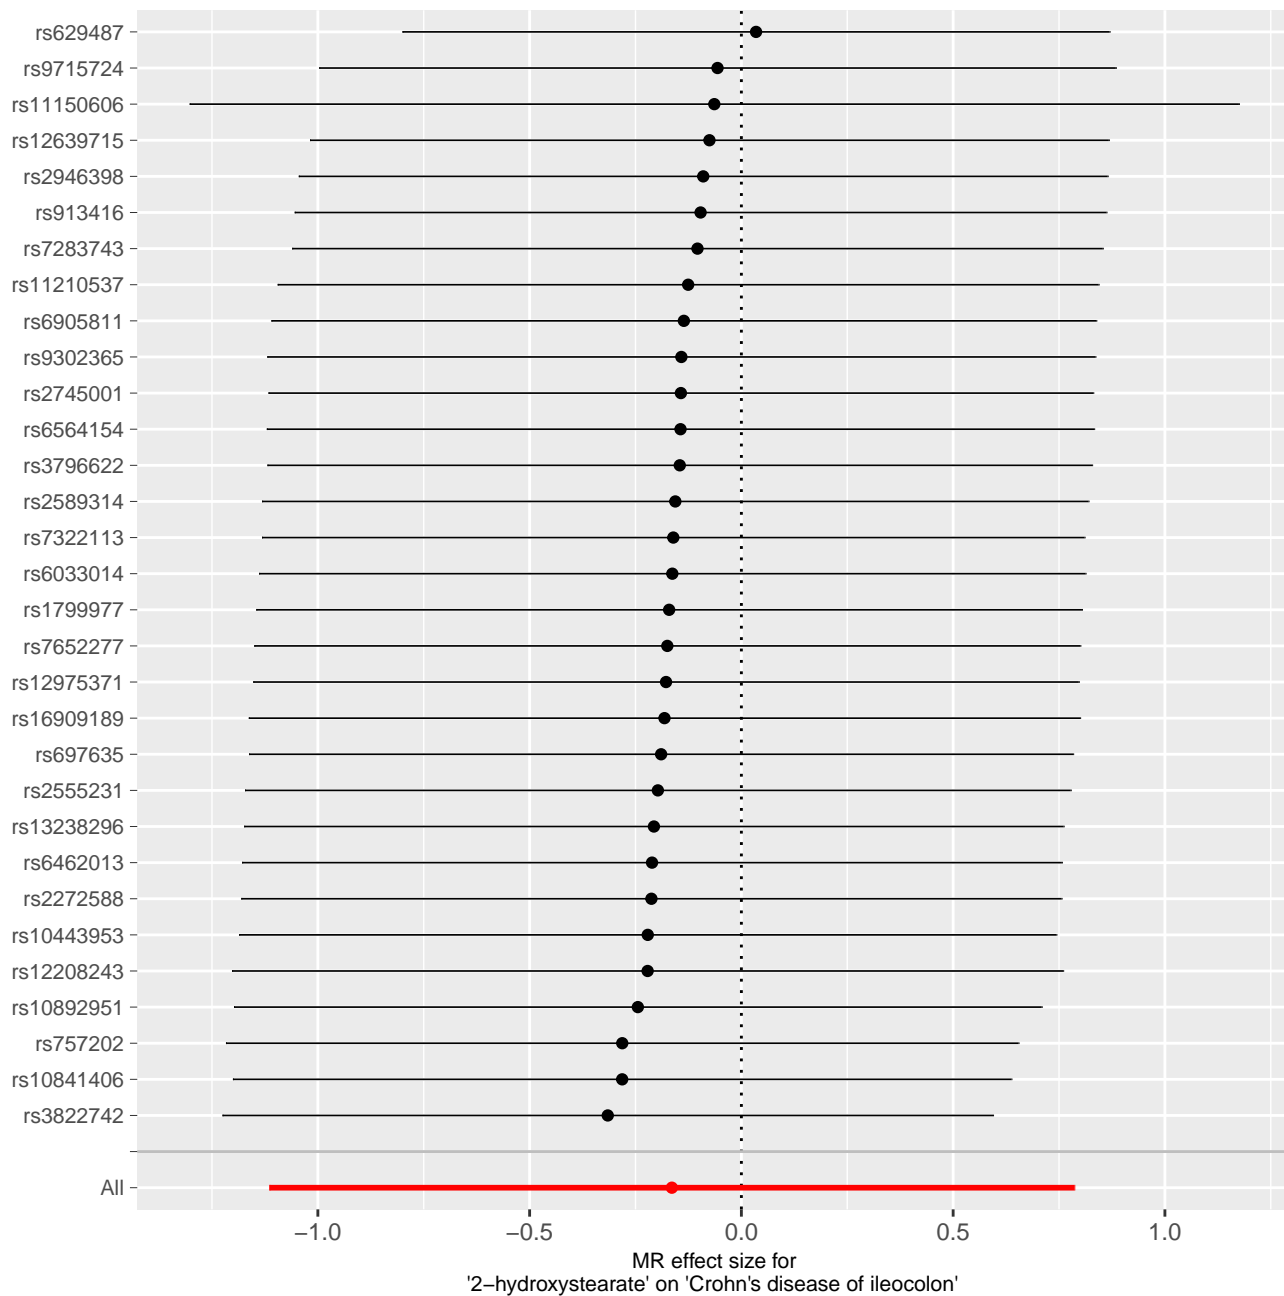

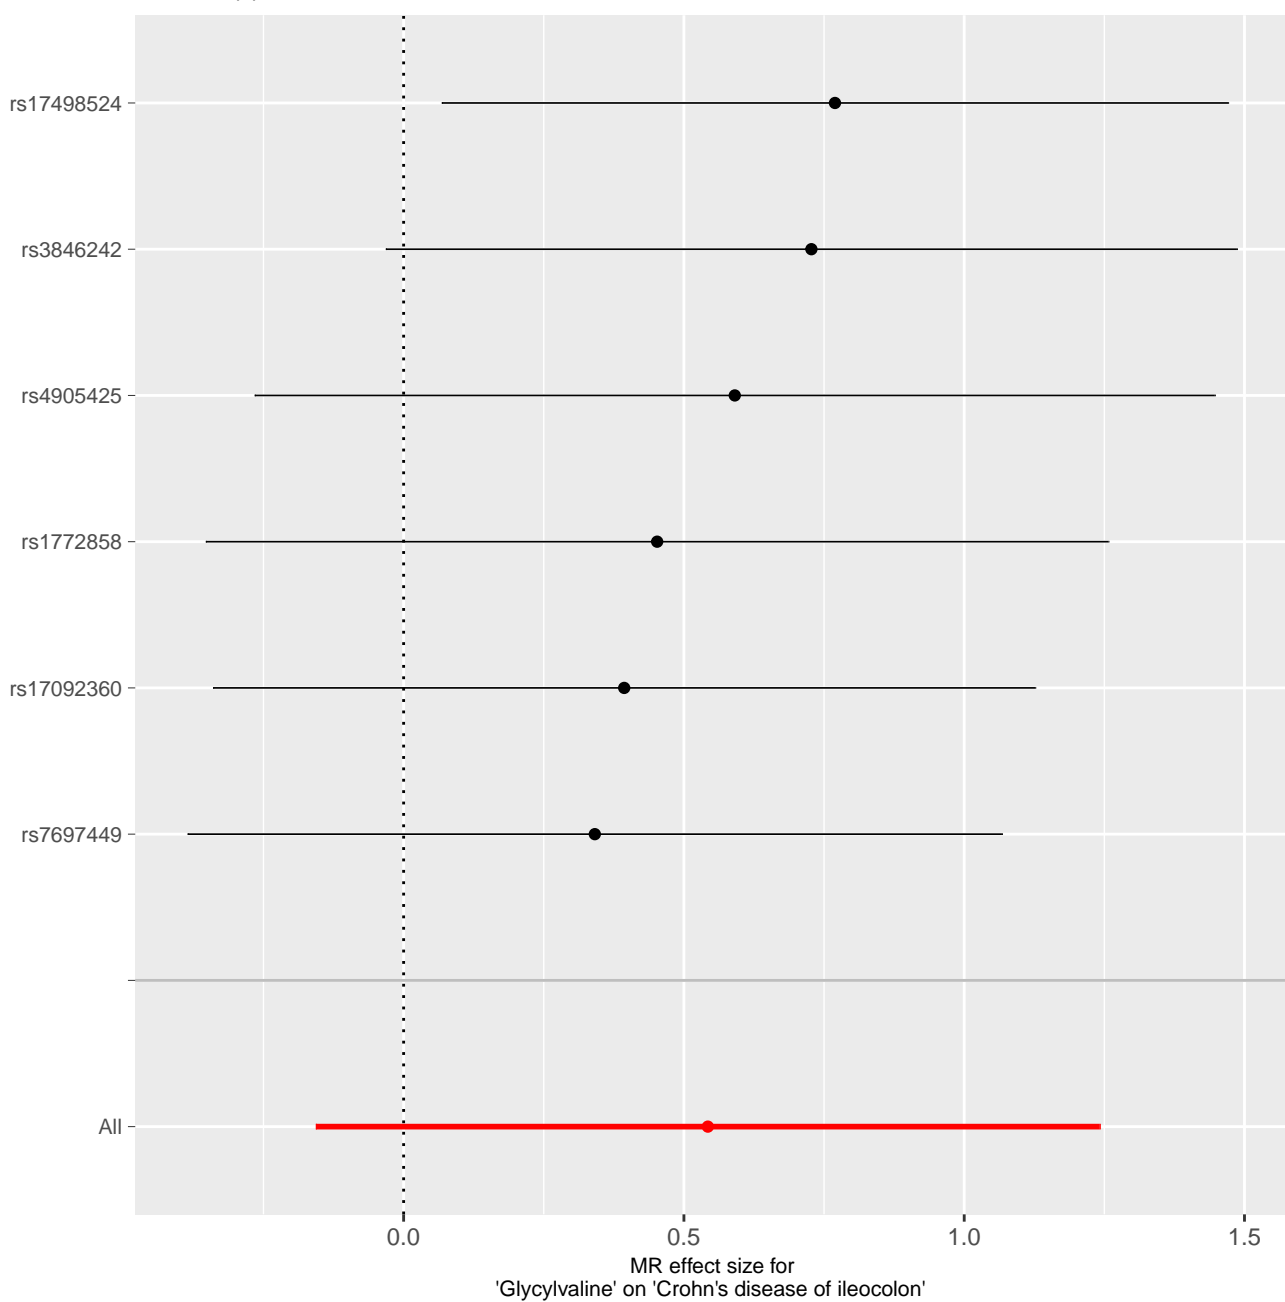

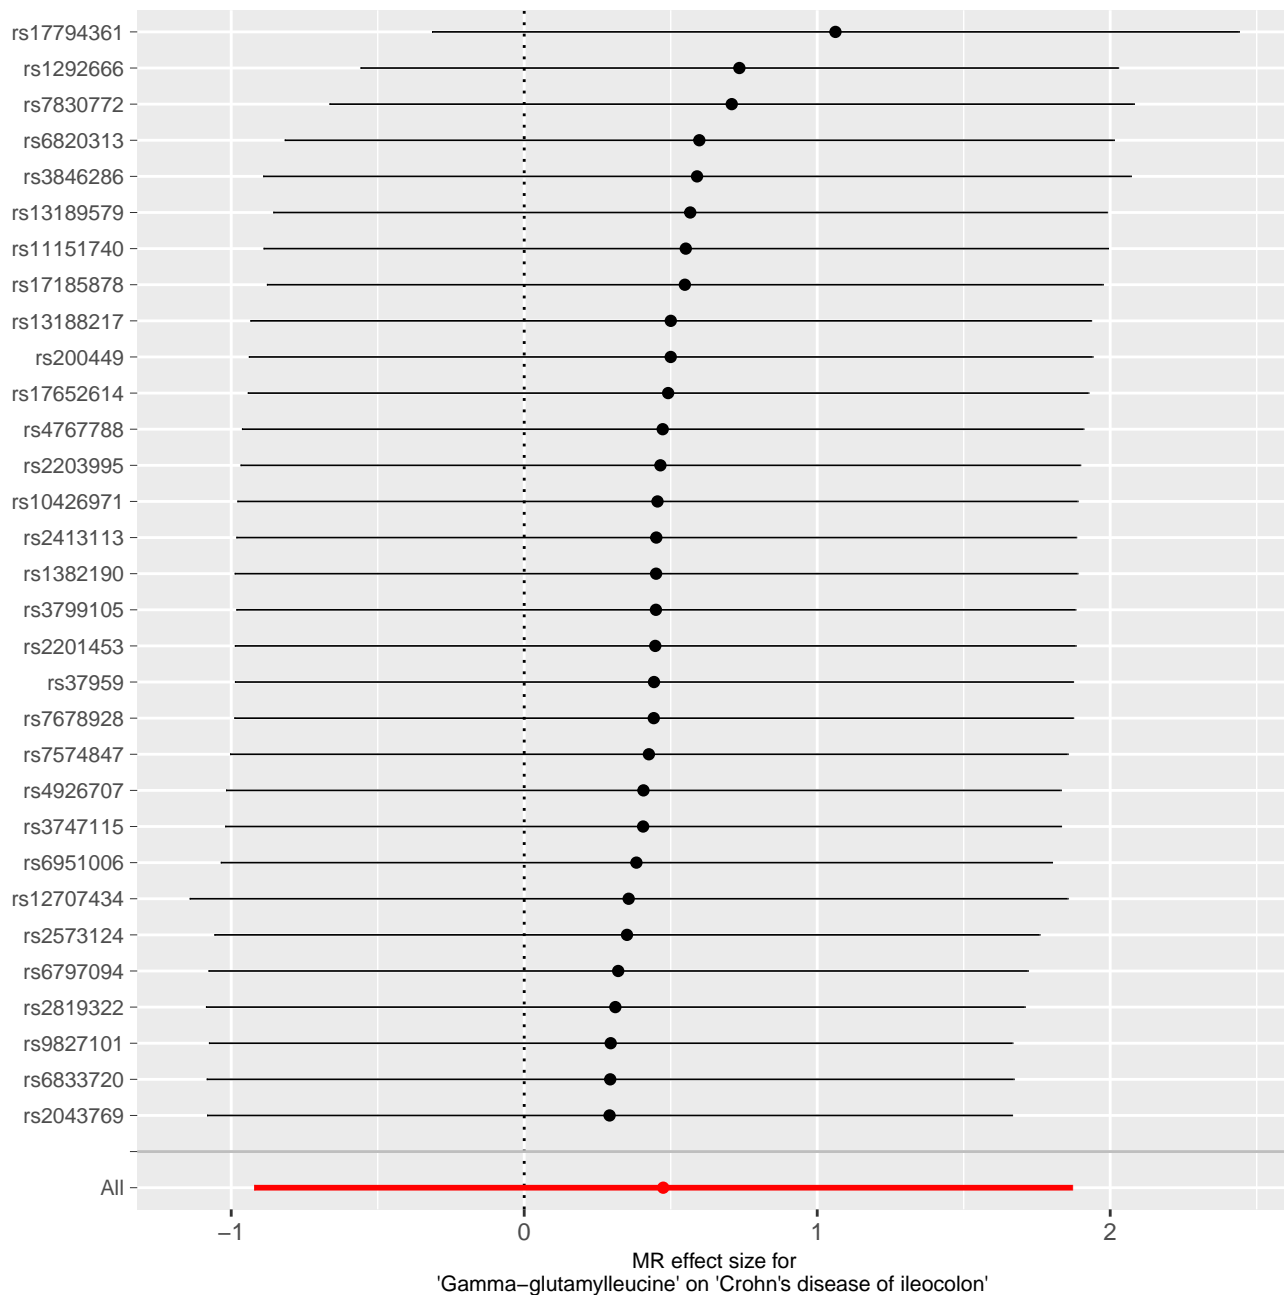

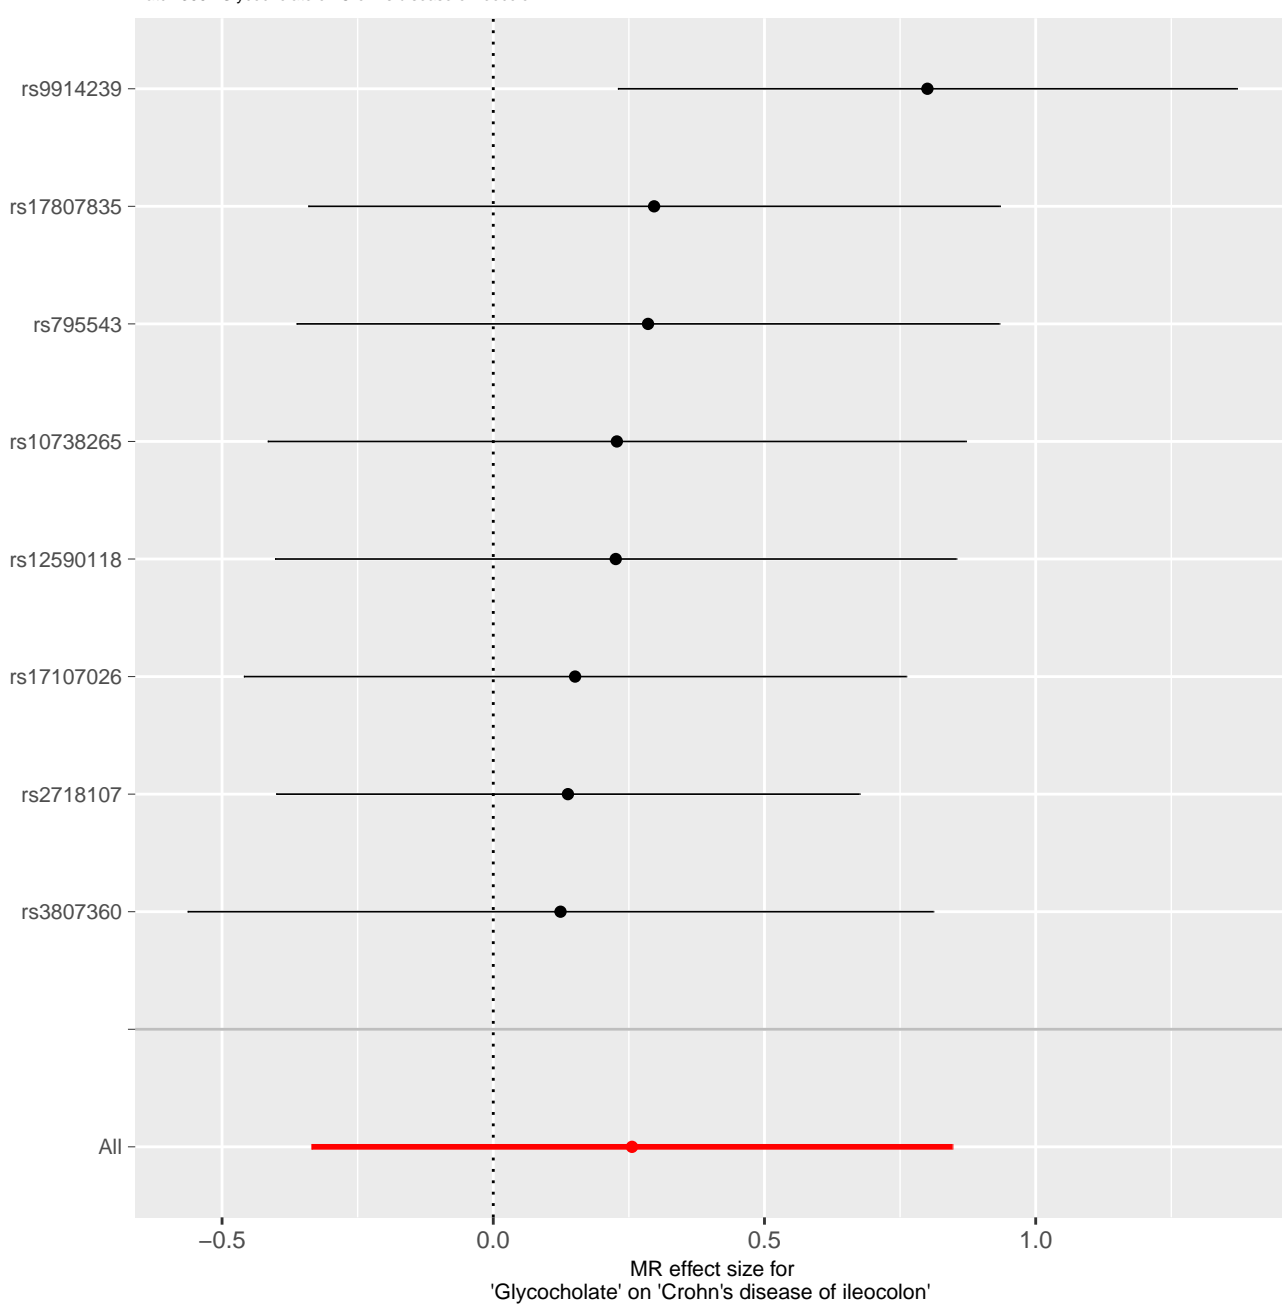



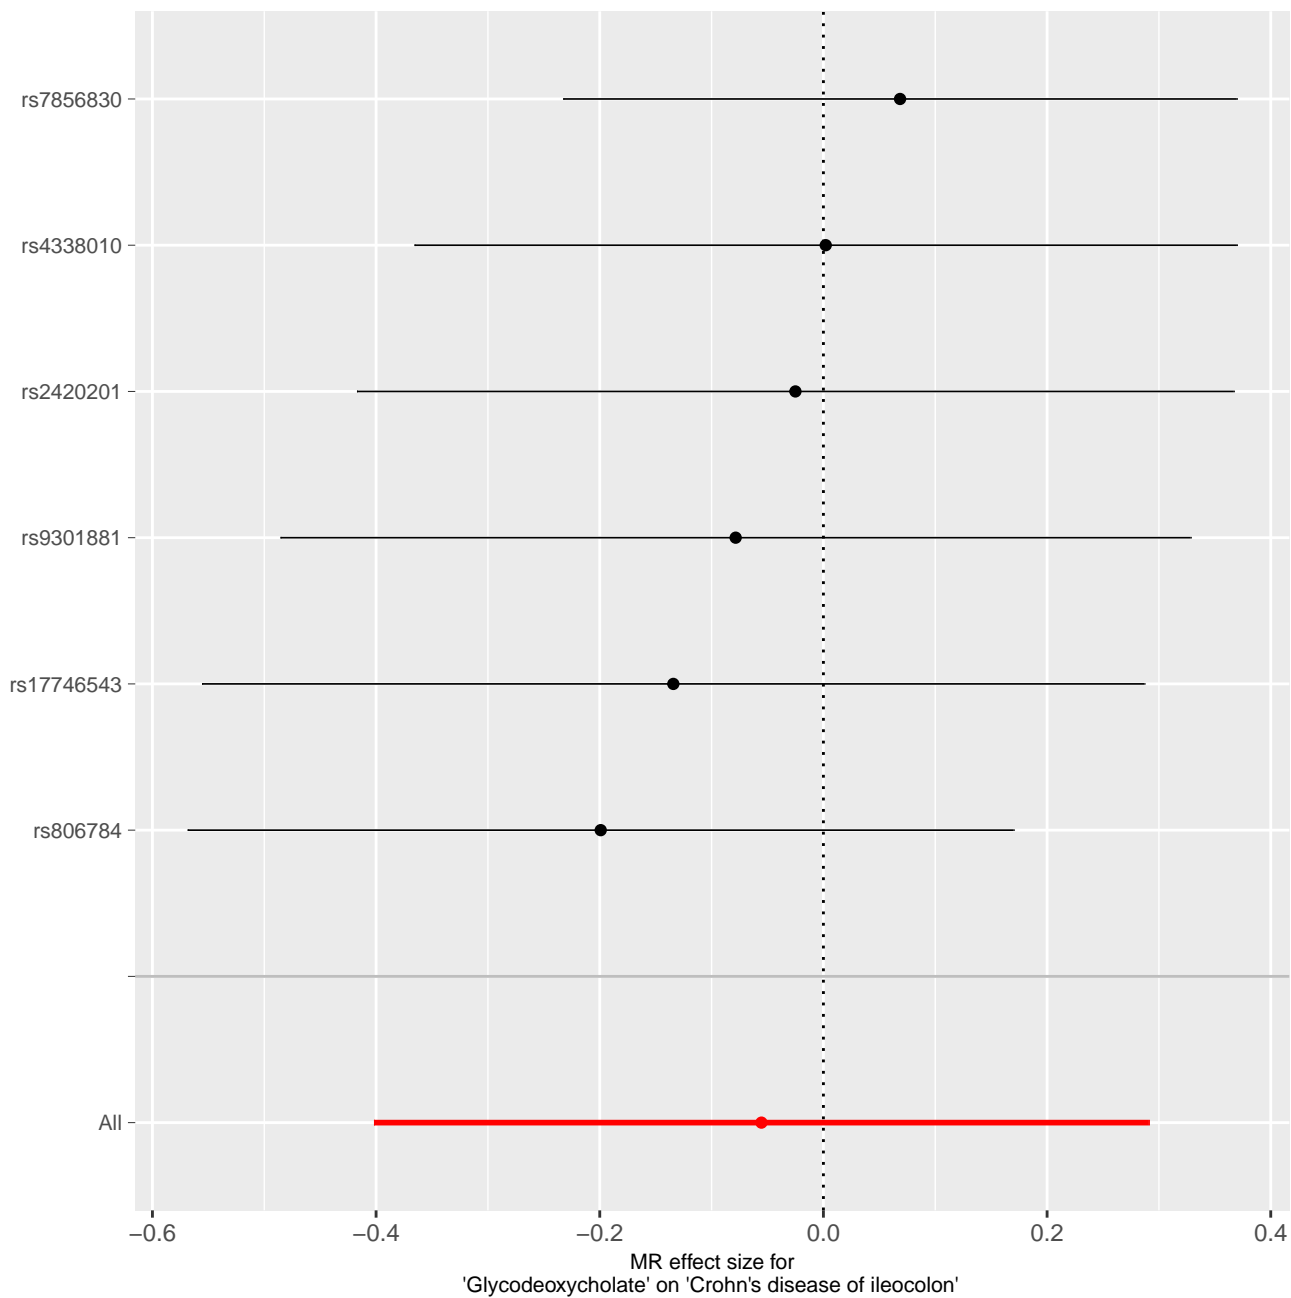

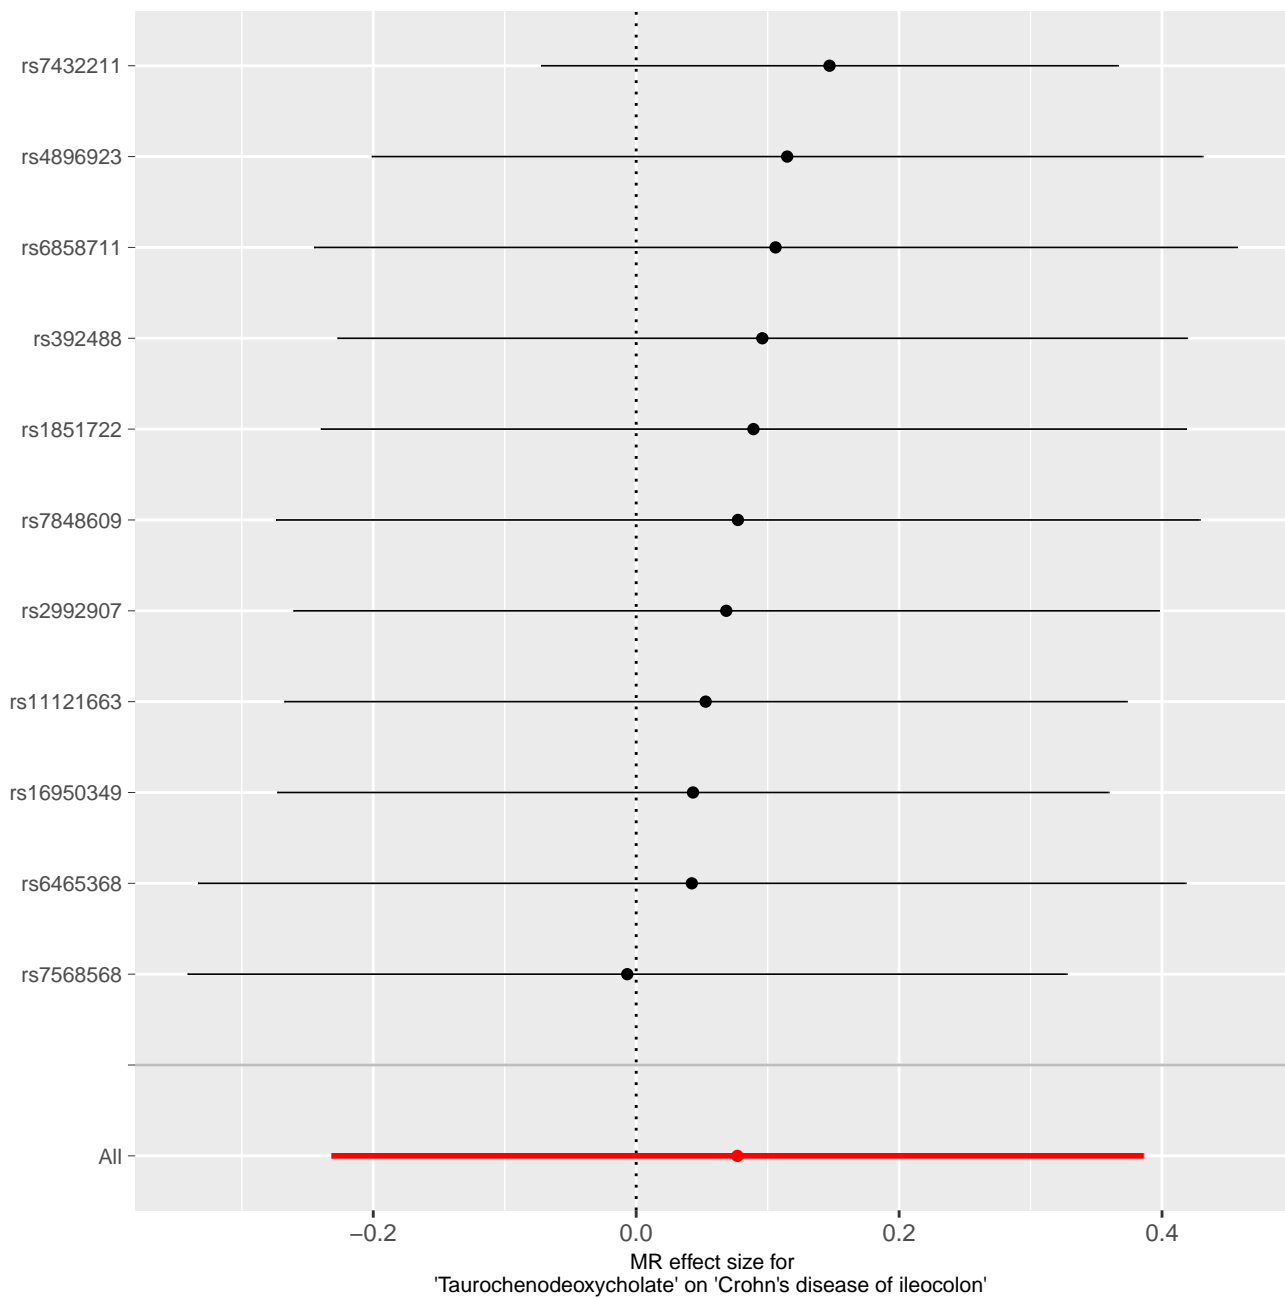

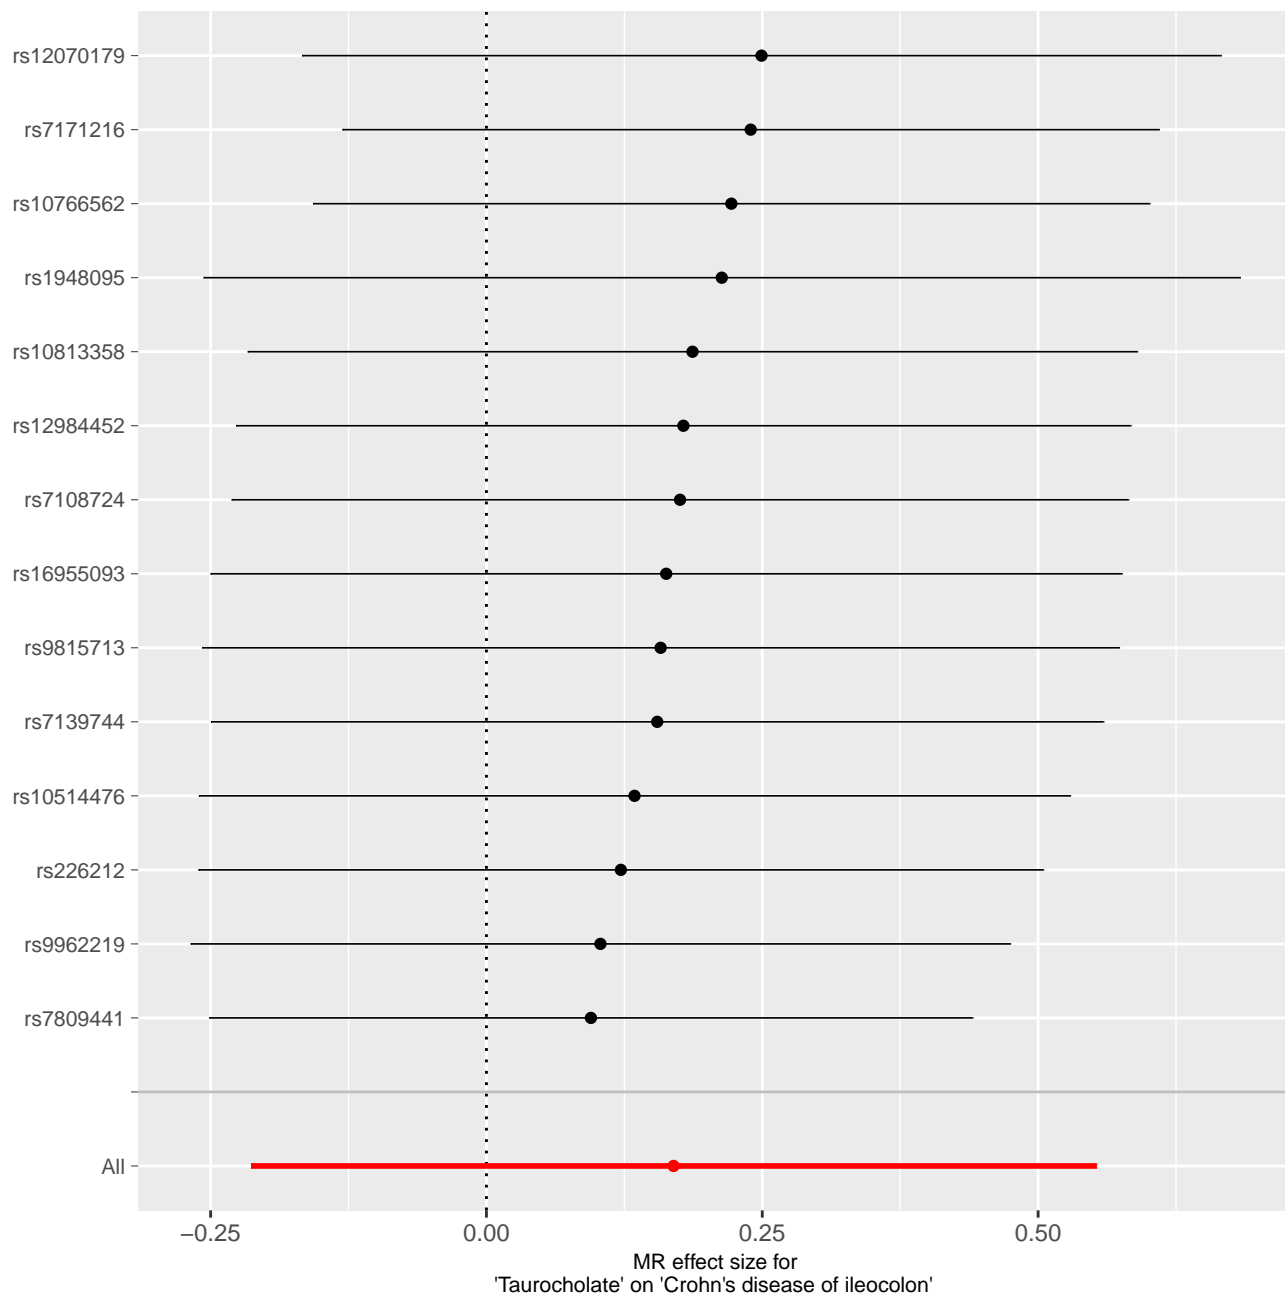

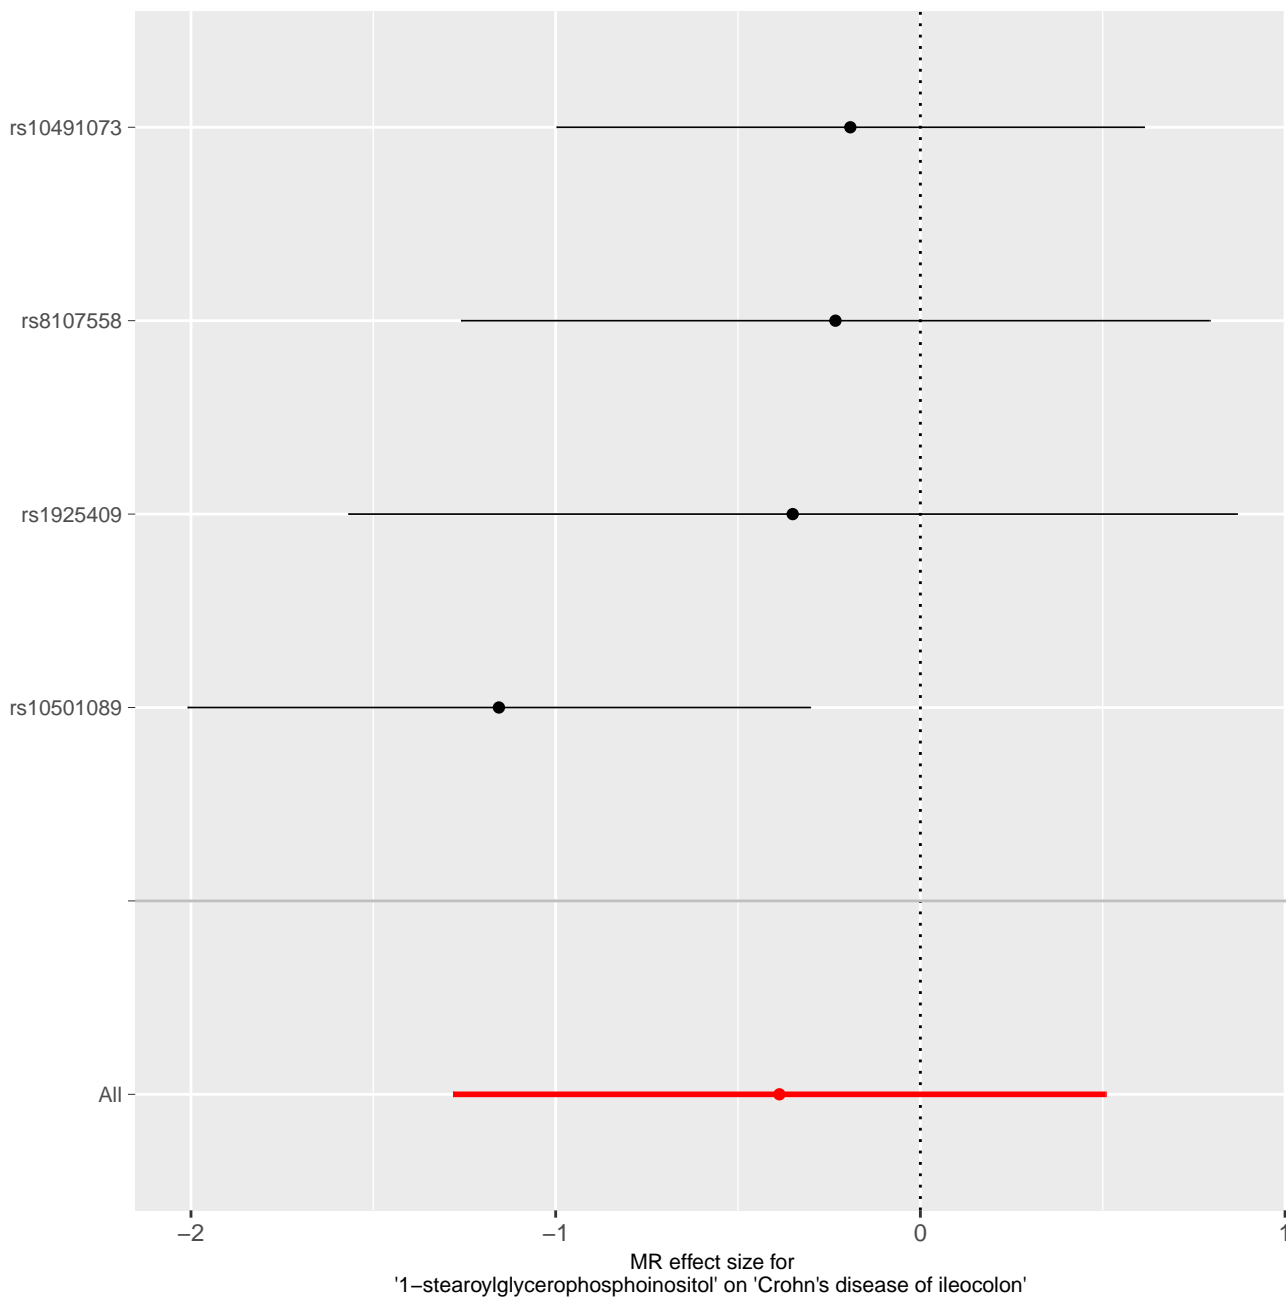

rs9756306

rs7570971

rs3800993

All

0.0

0.5

1.0

1.5

2.0

MR effect size for  
'1,5-anhydroglucitol (1,5-AG)' on 'Crohn's disease of ileocolon'

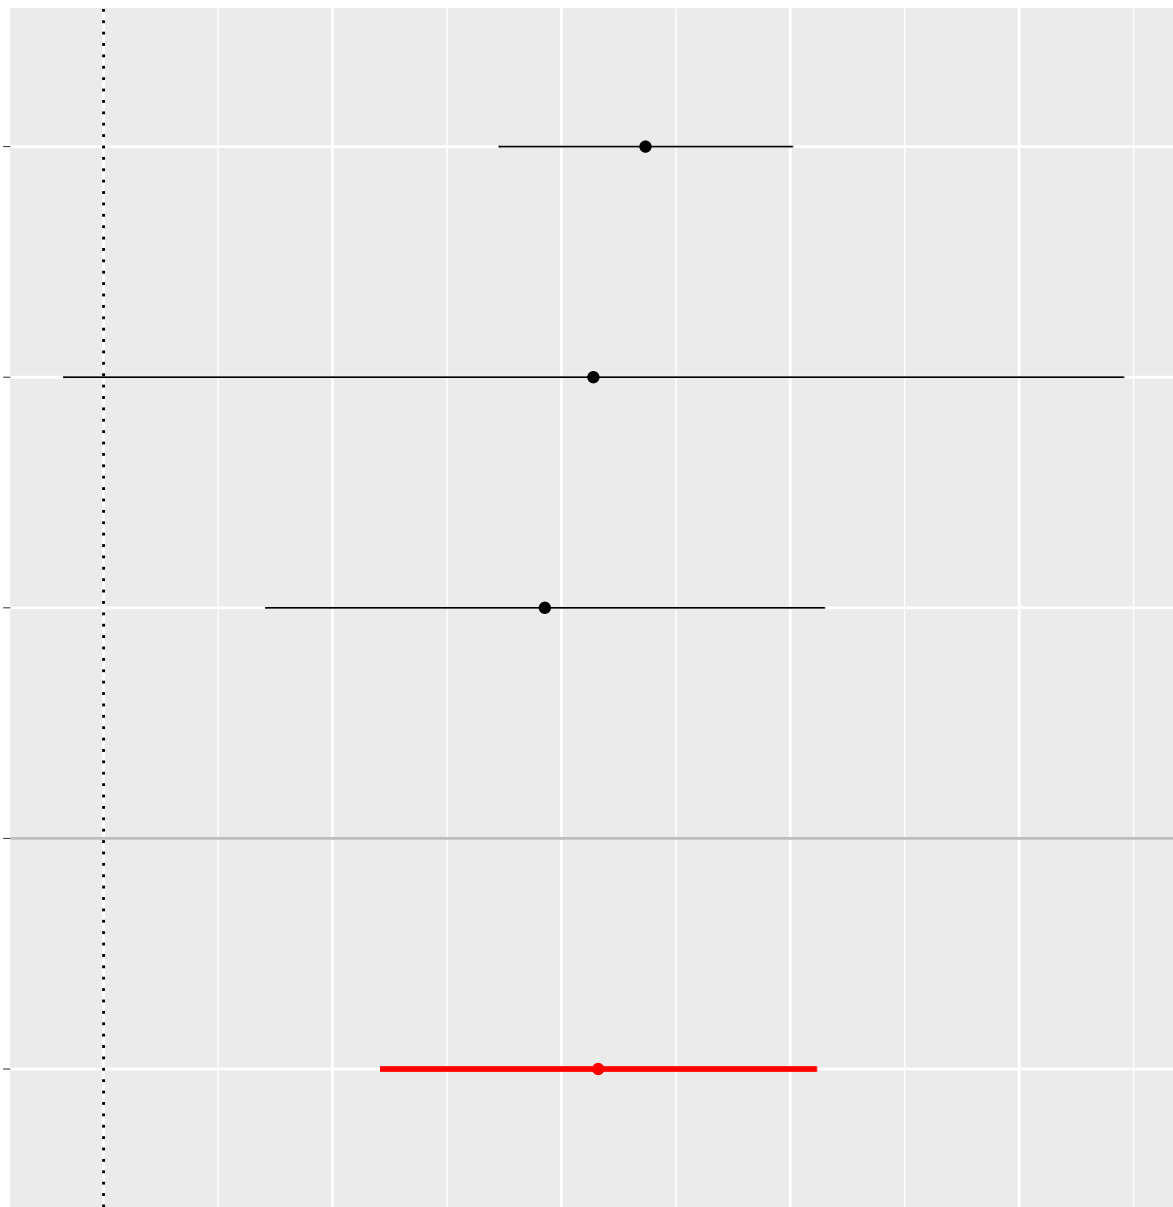

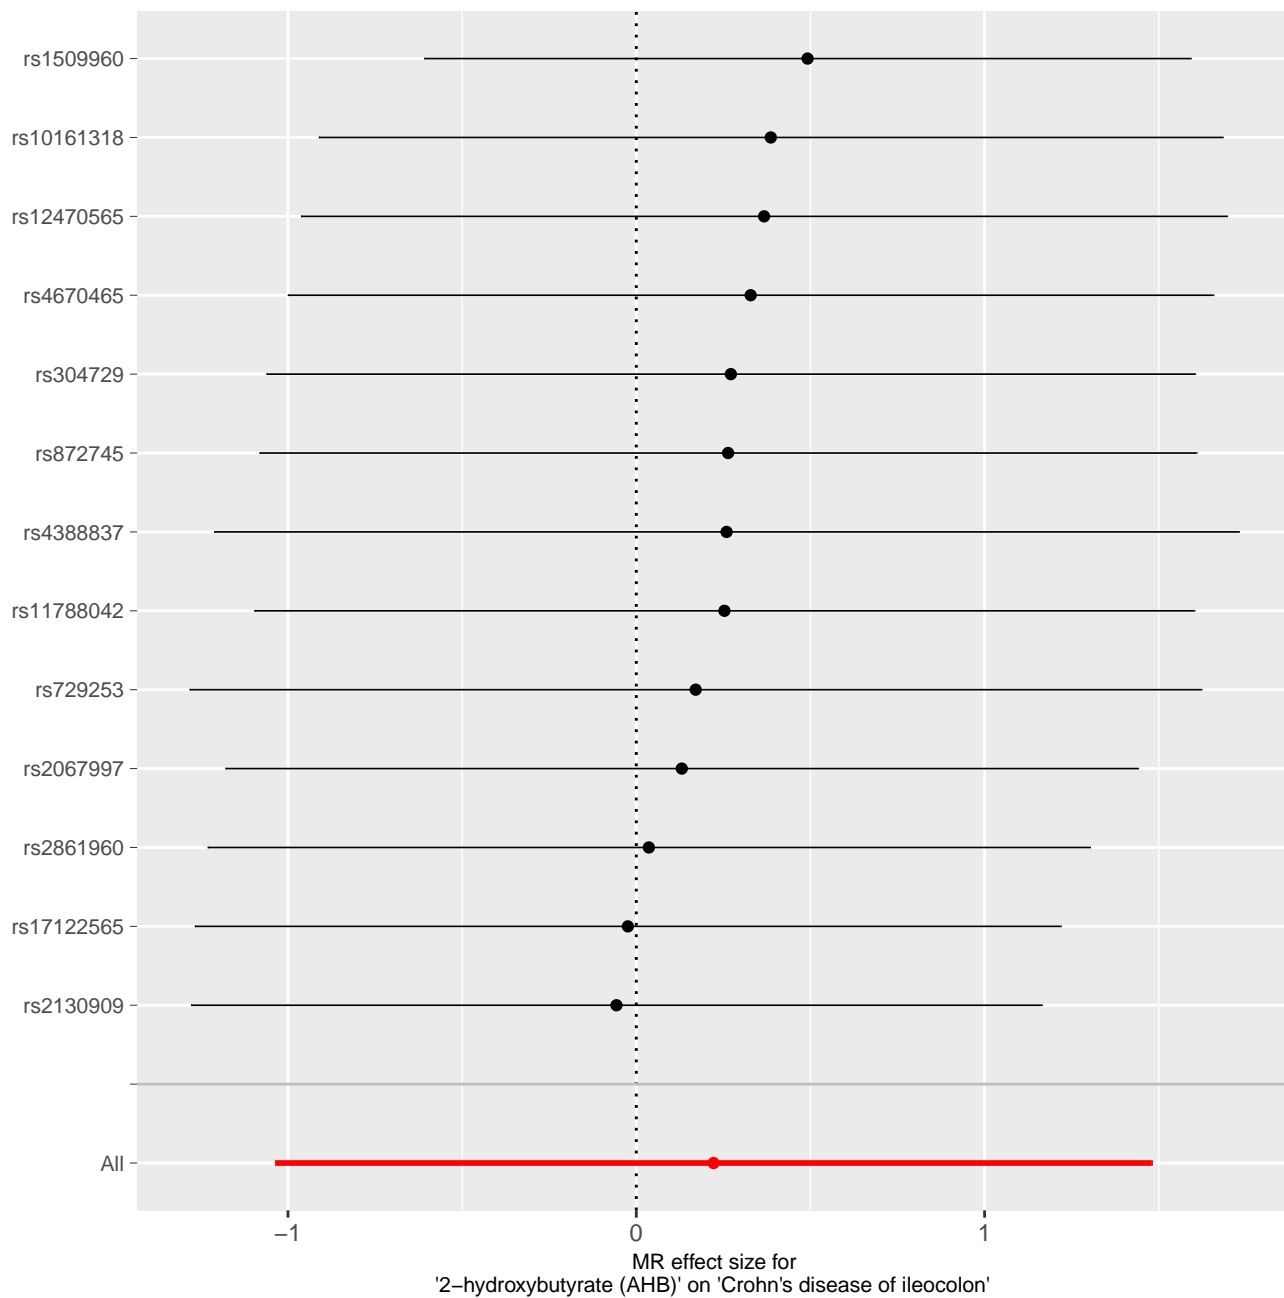

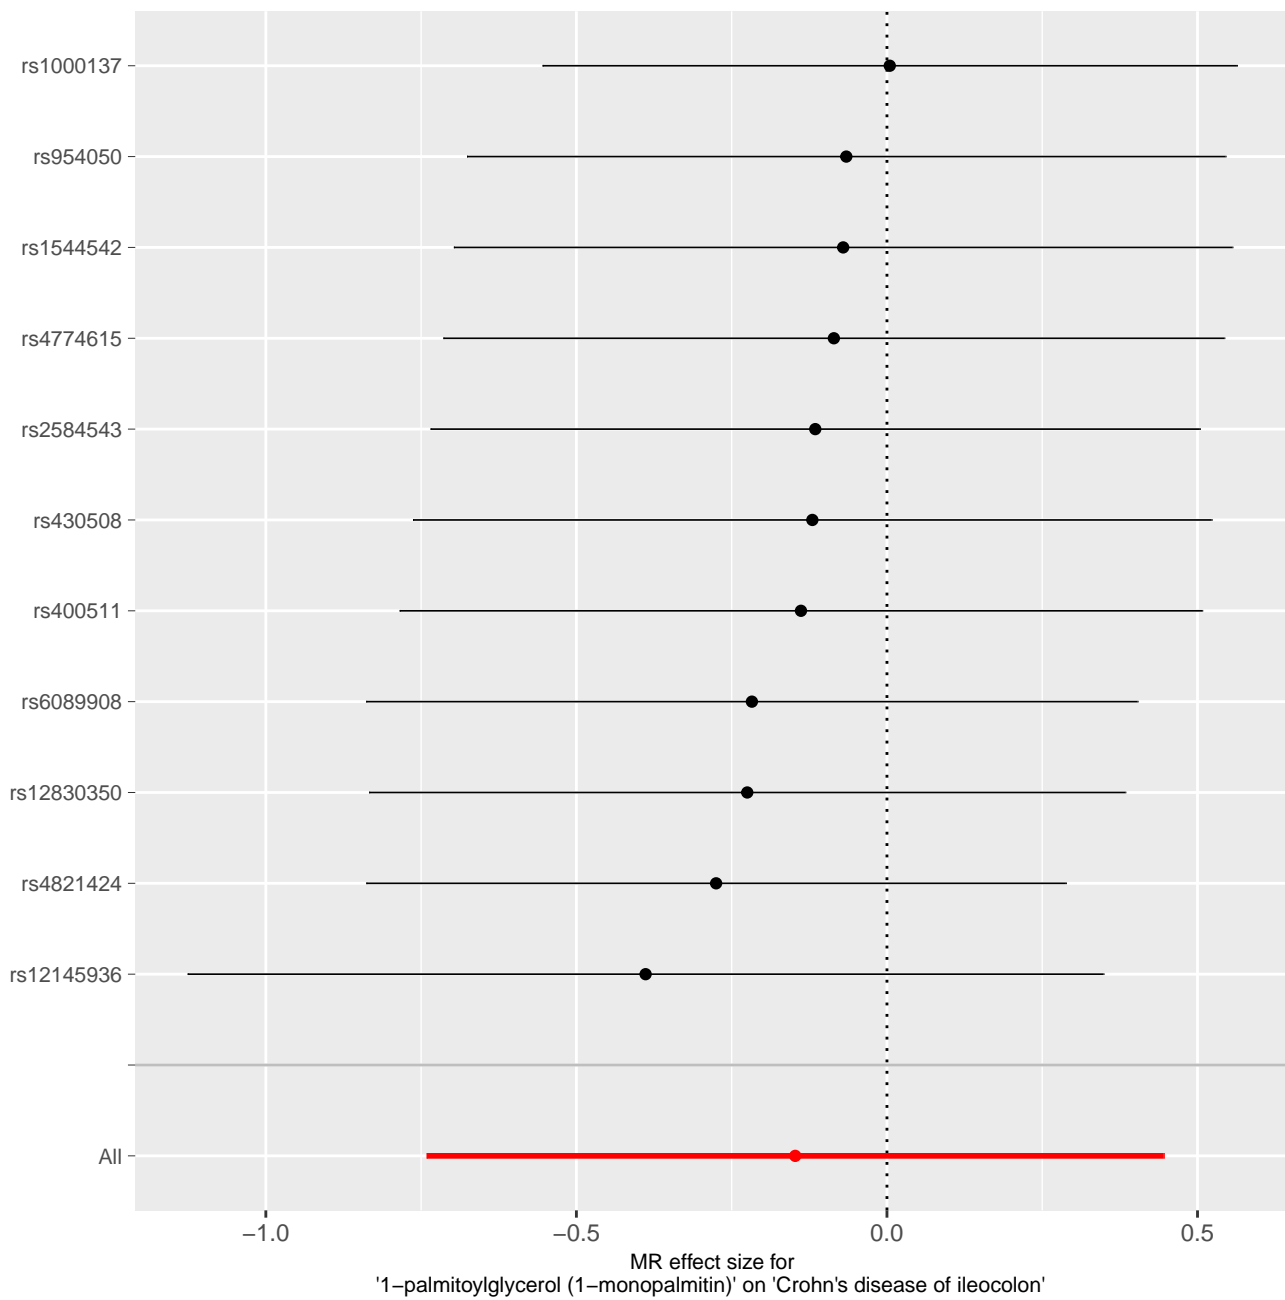

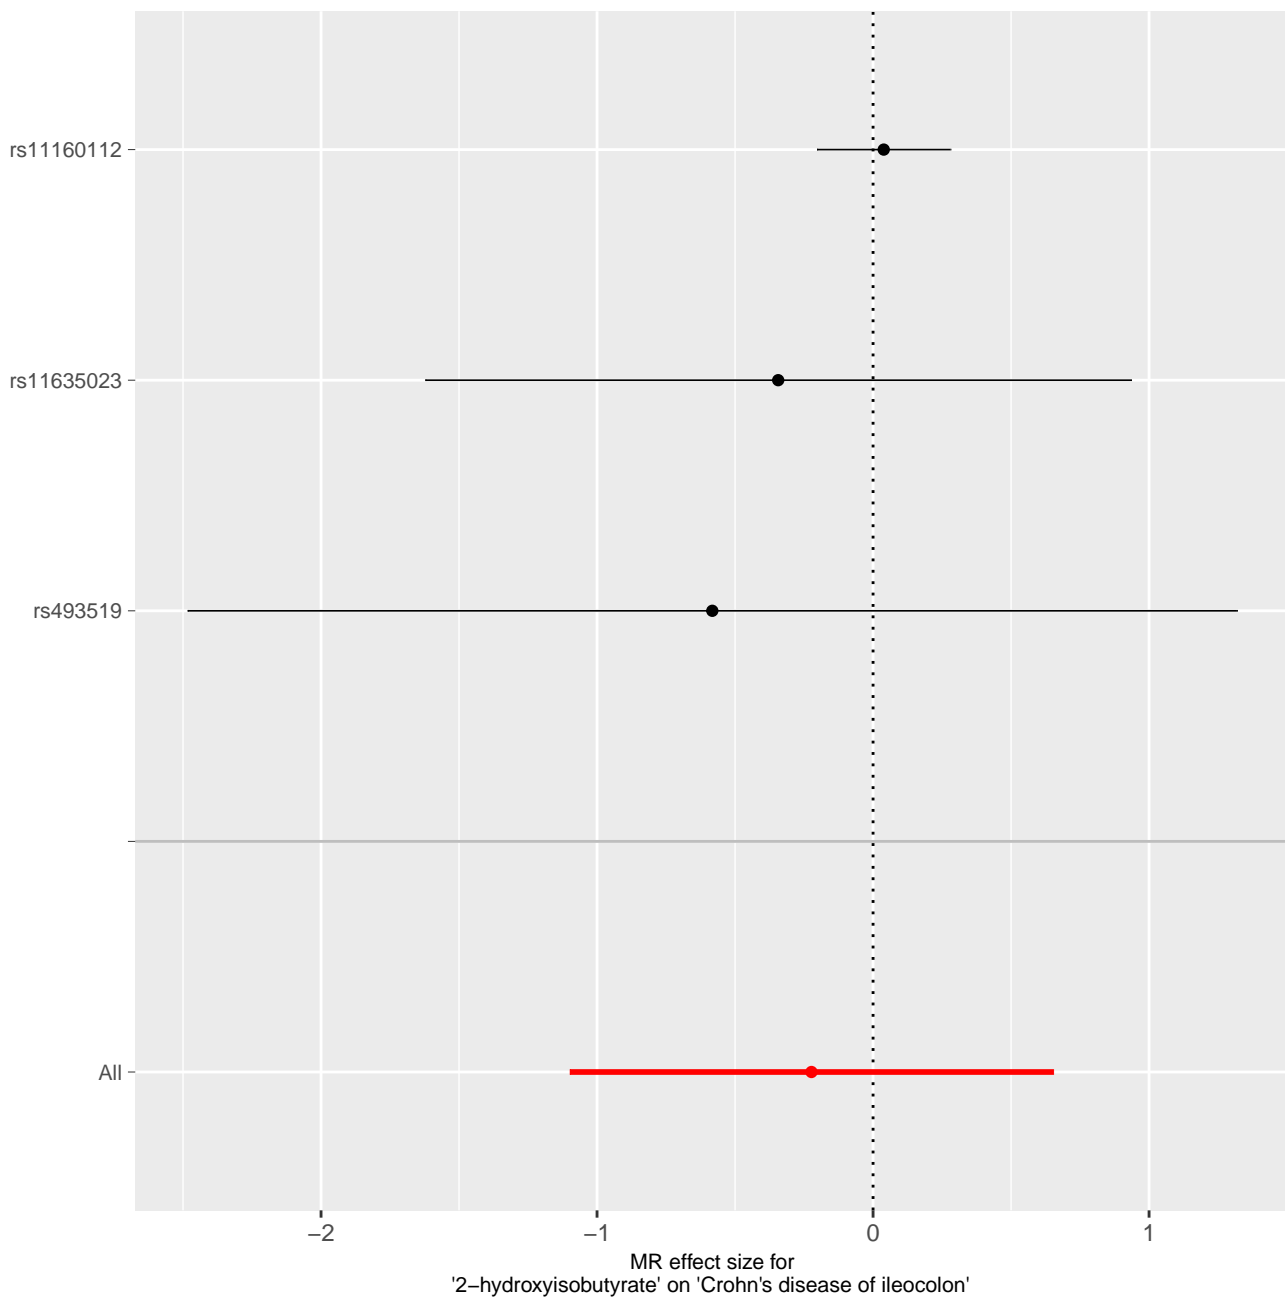



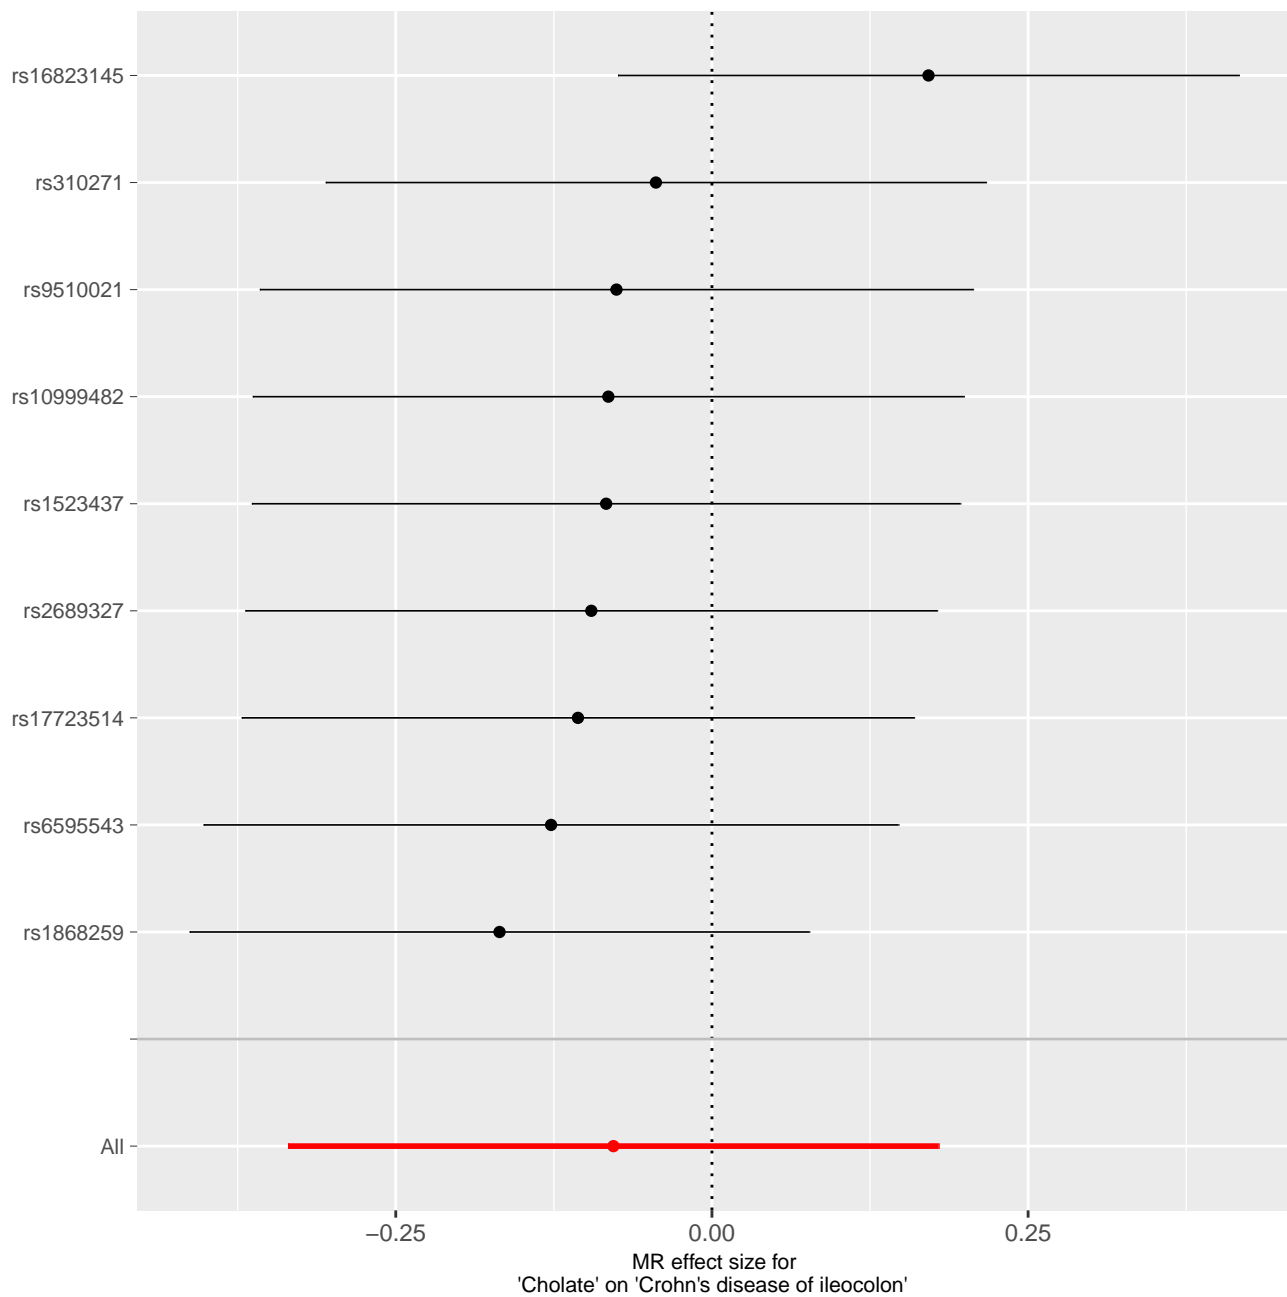

Batch 391 : Hydoxycholates on Crohn's disease of ileocolon

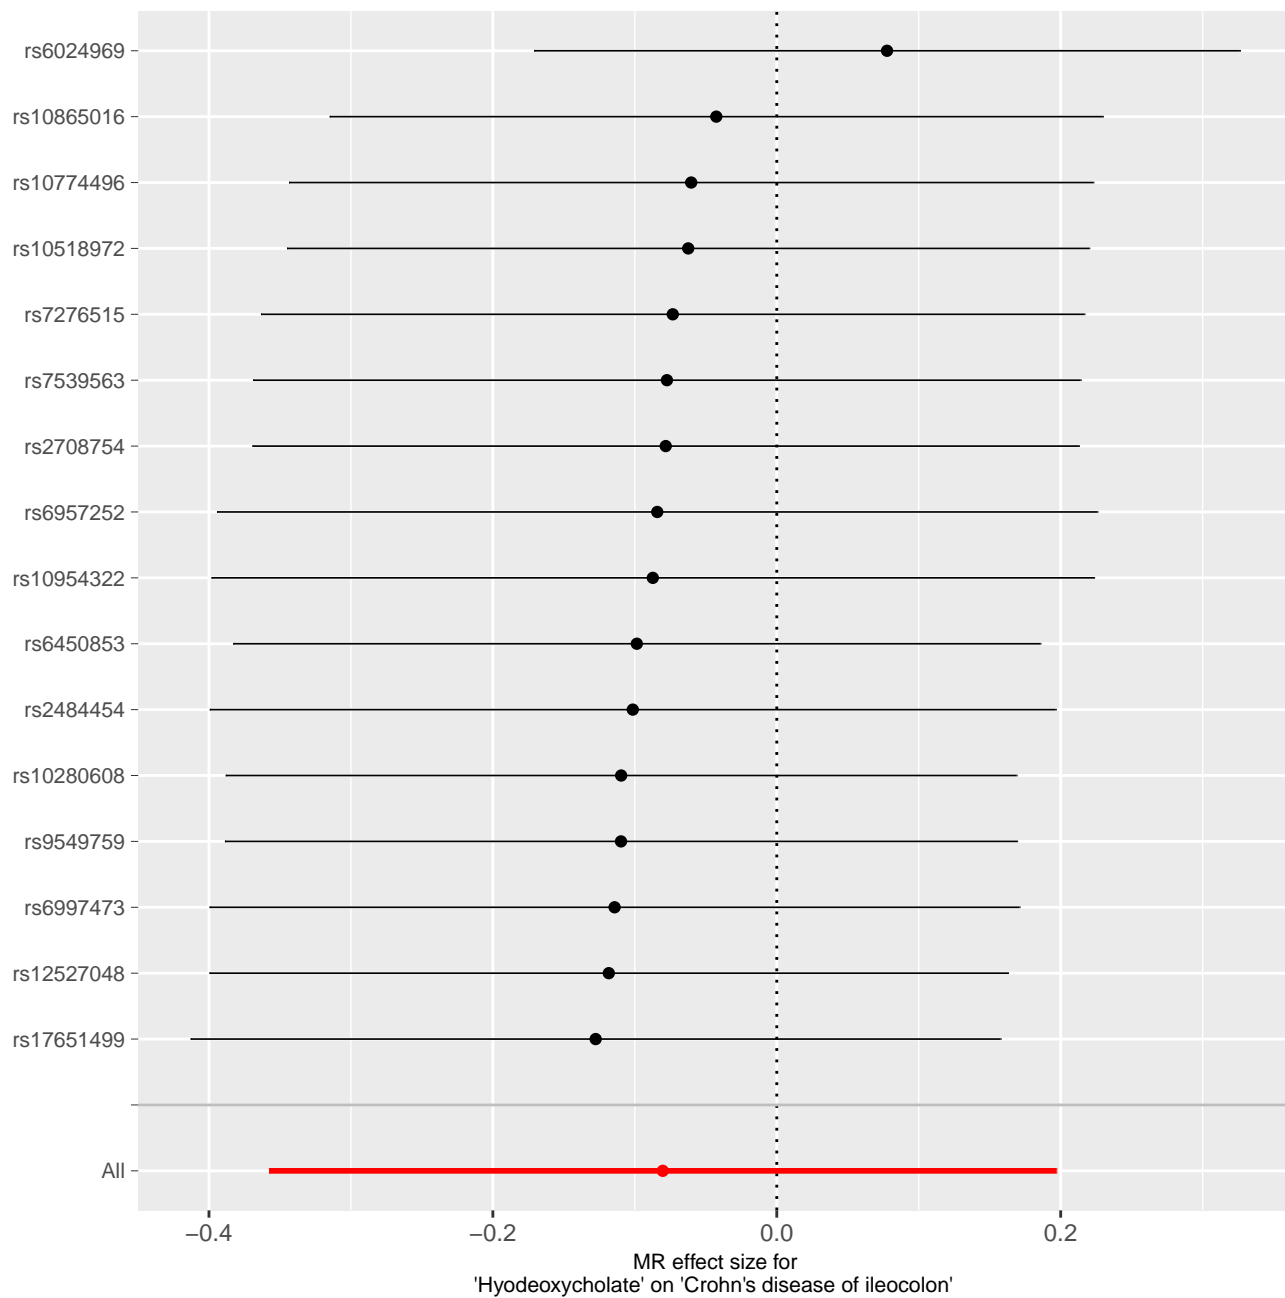

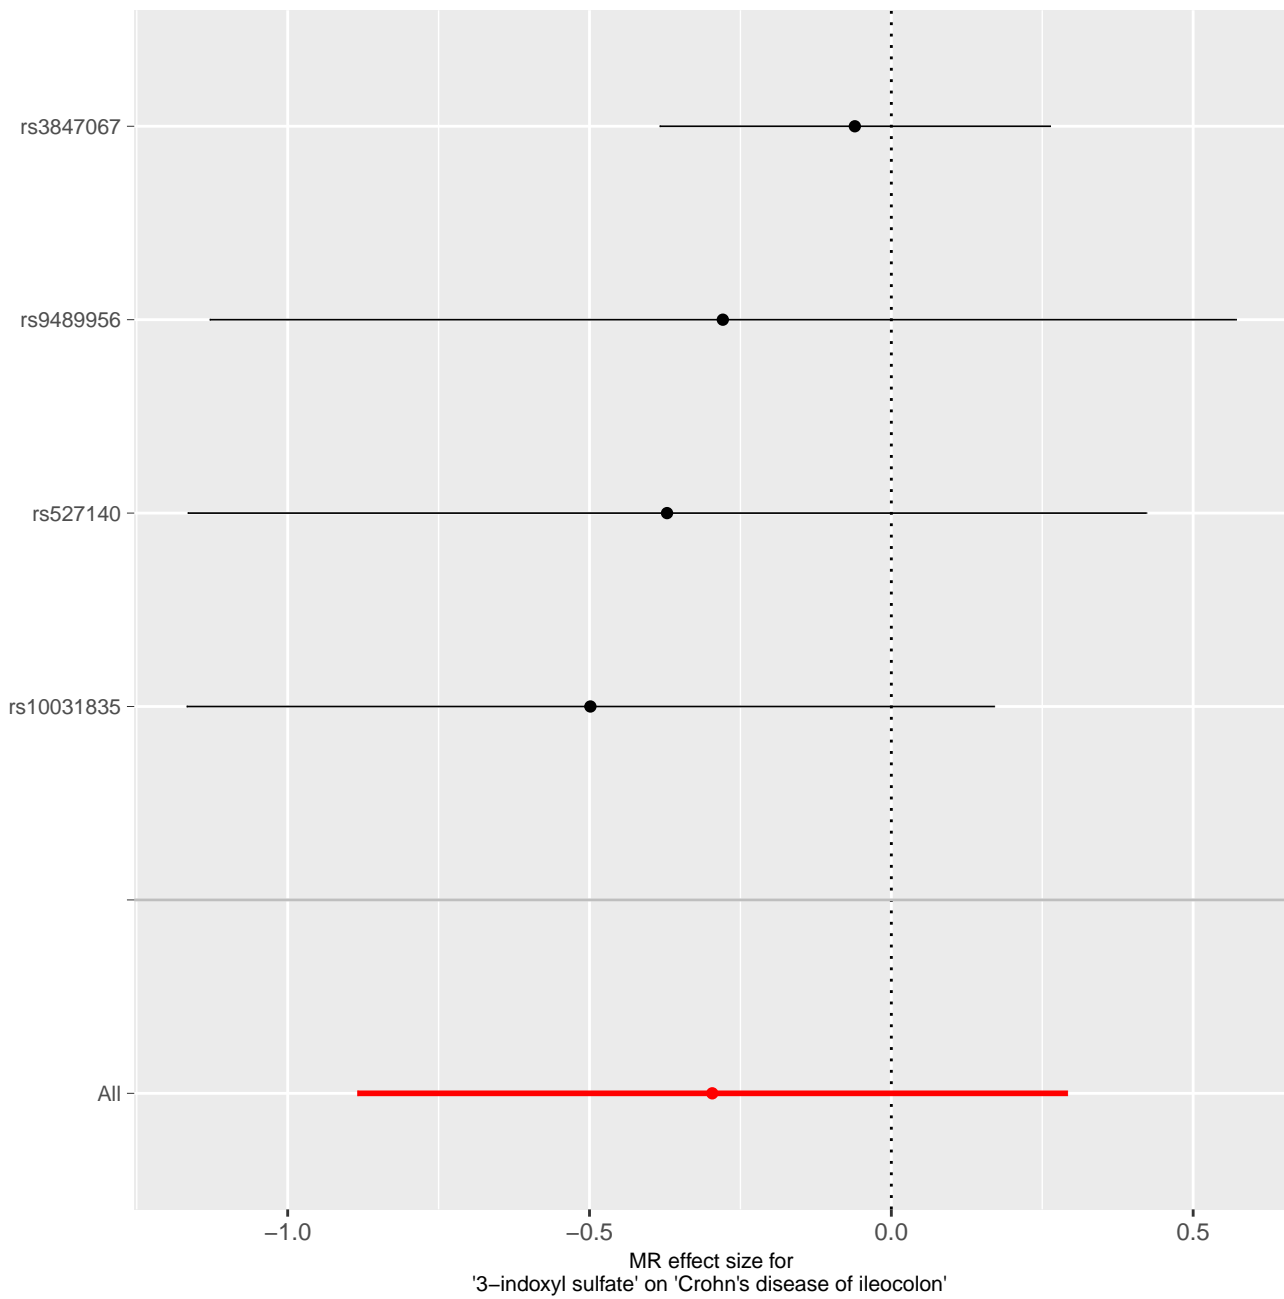

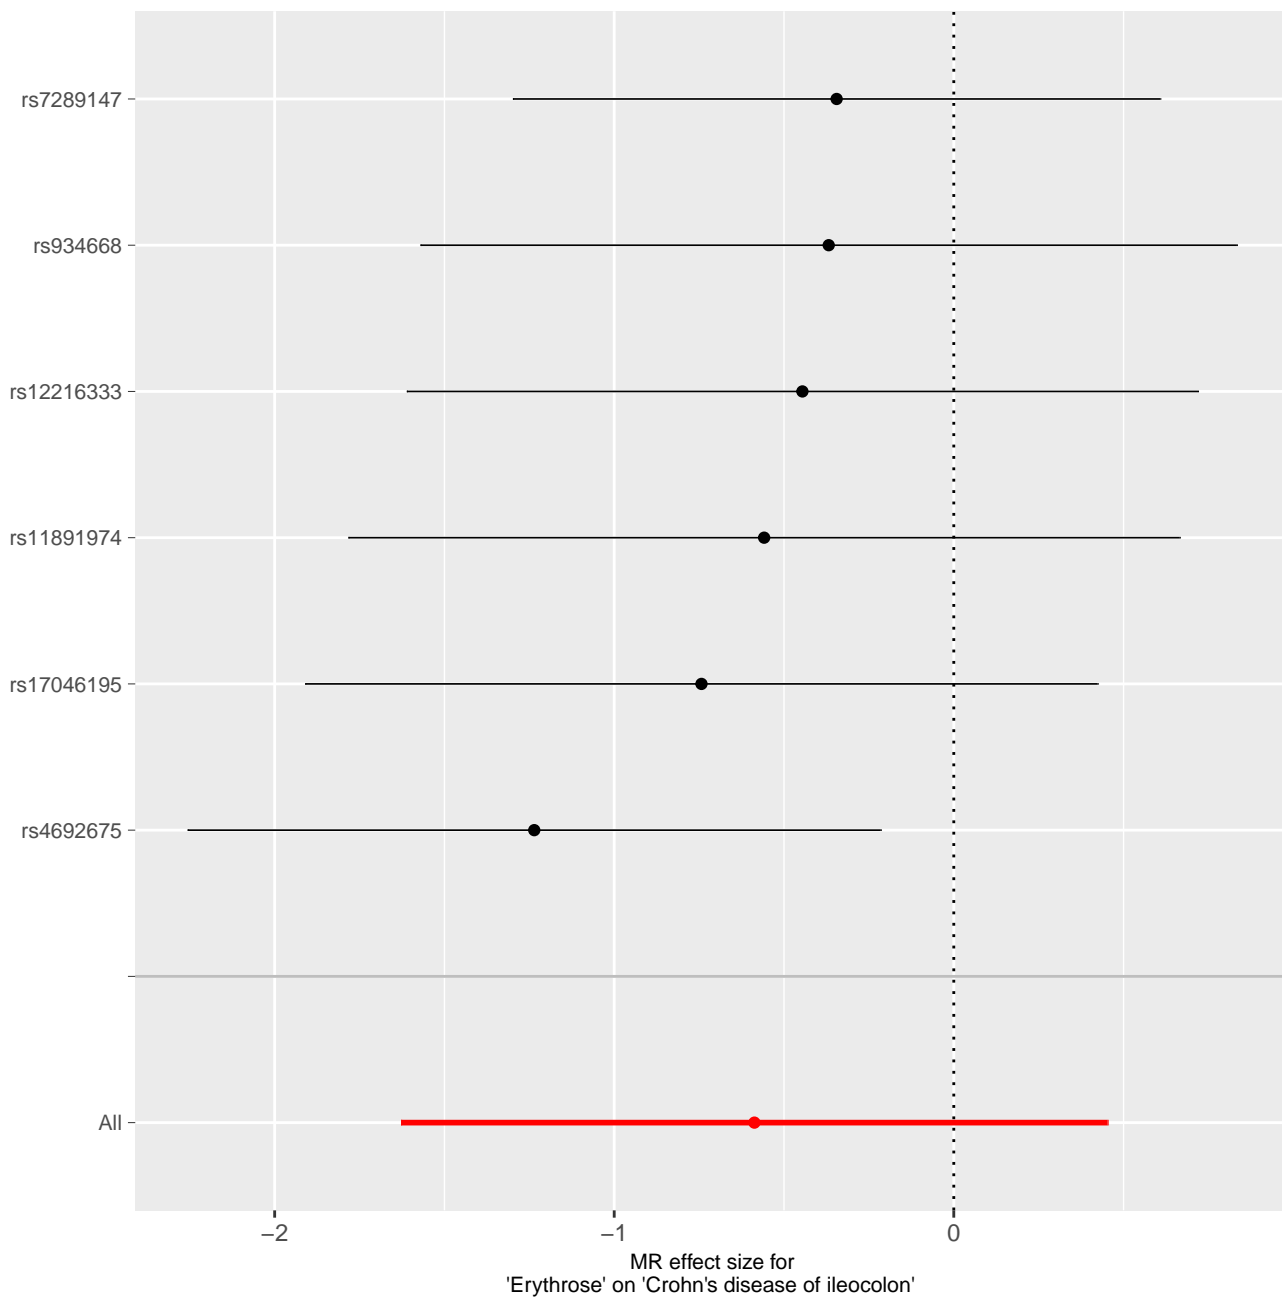

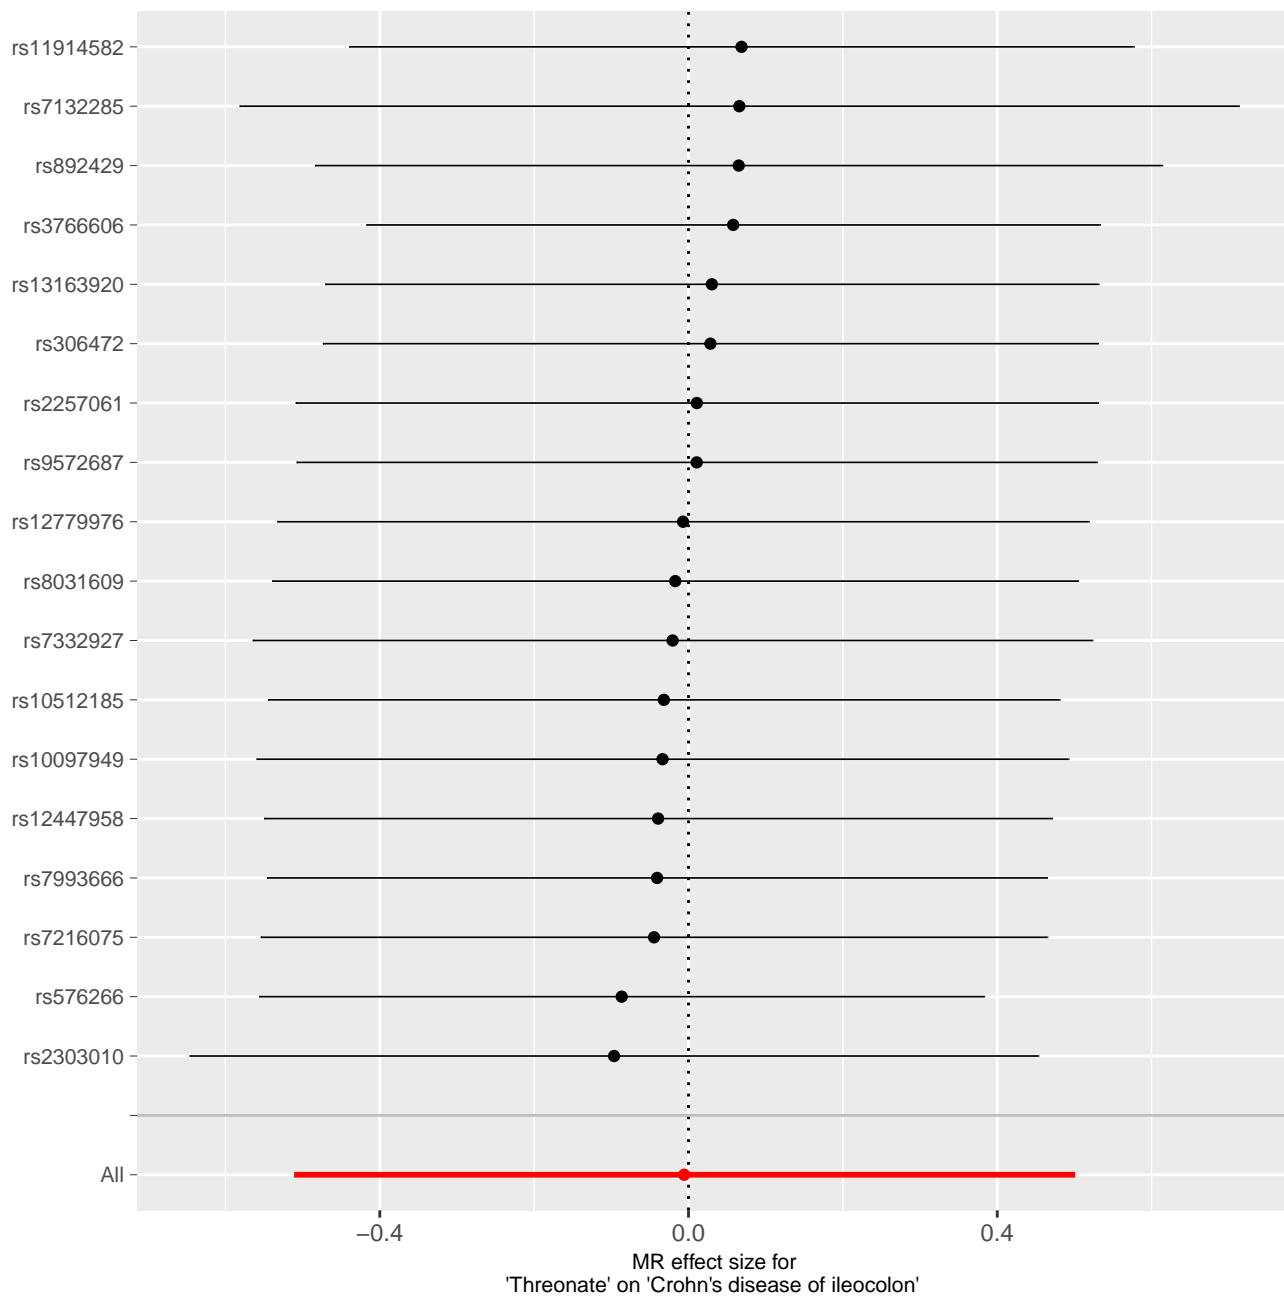

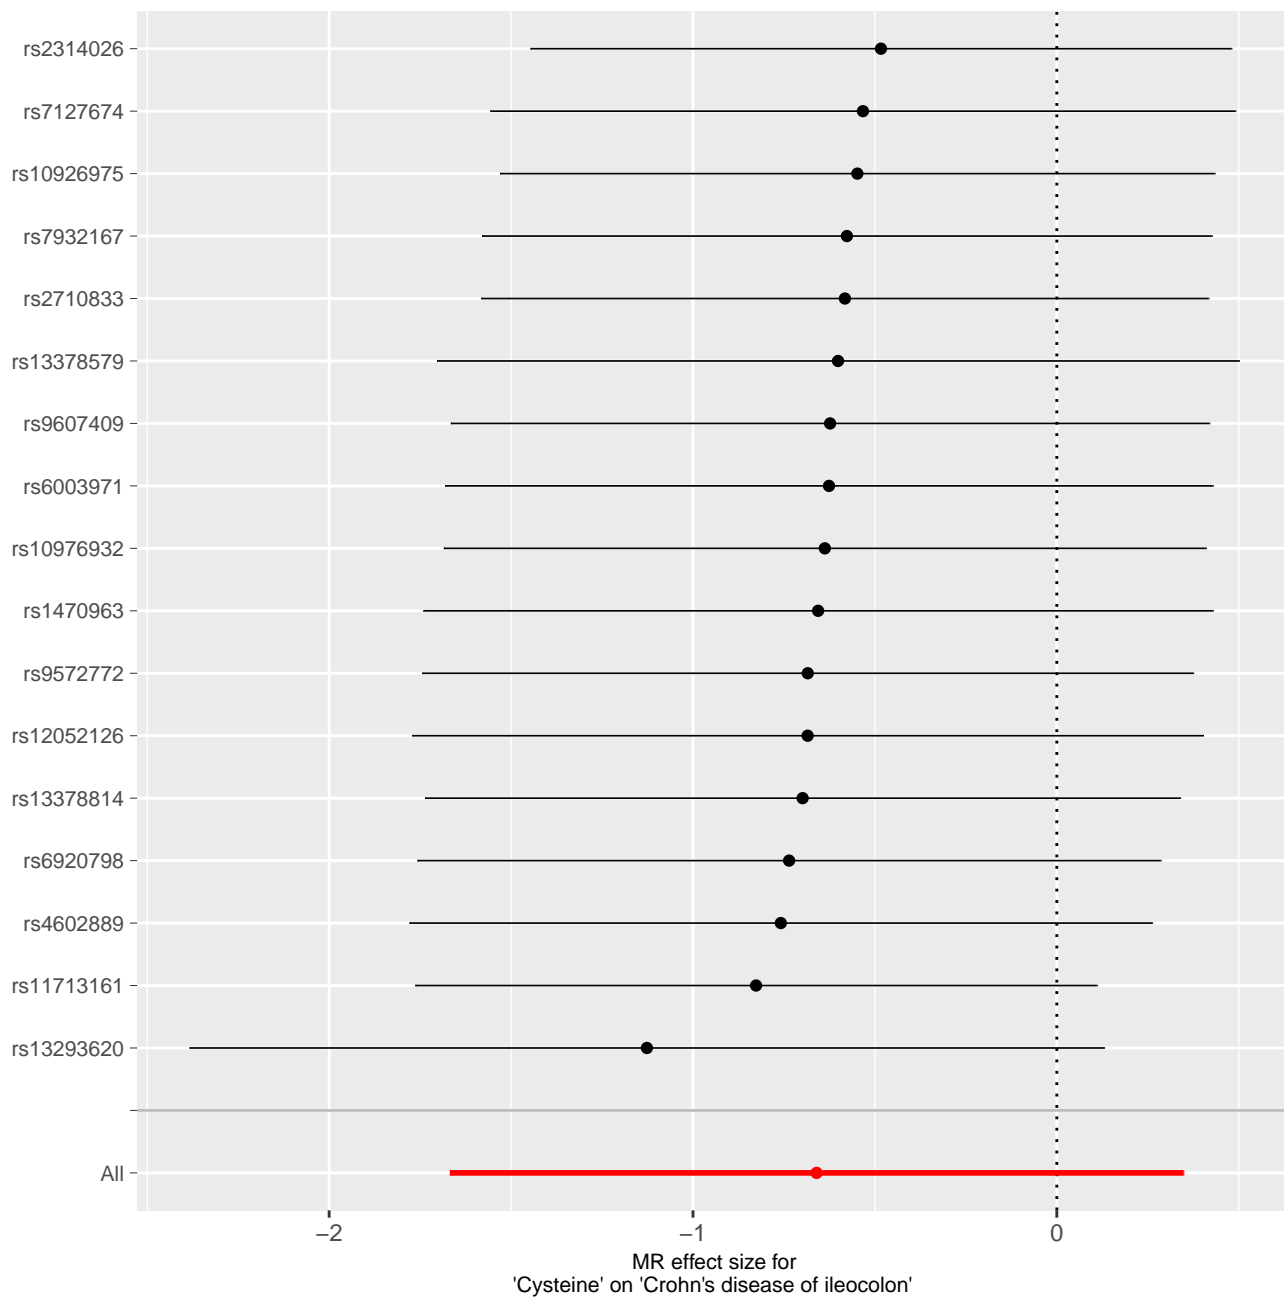

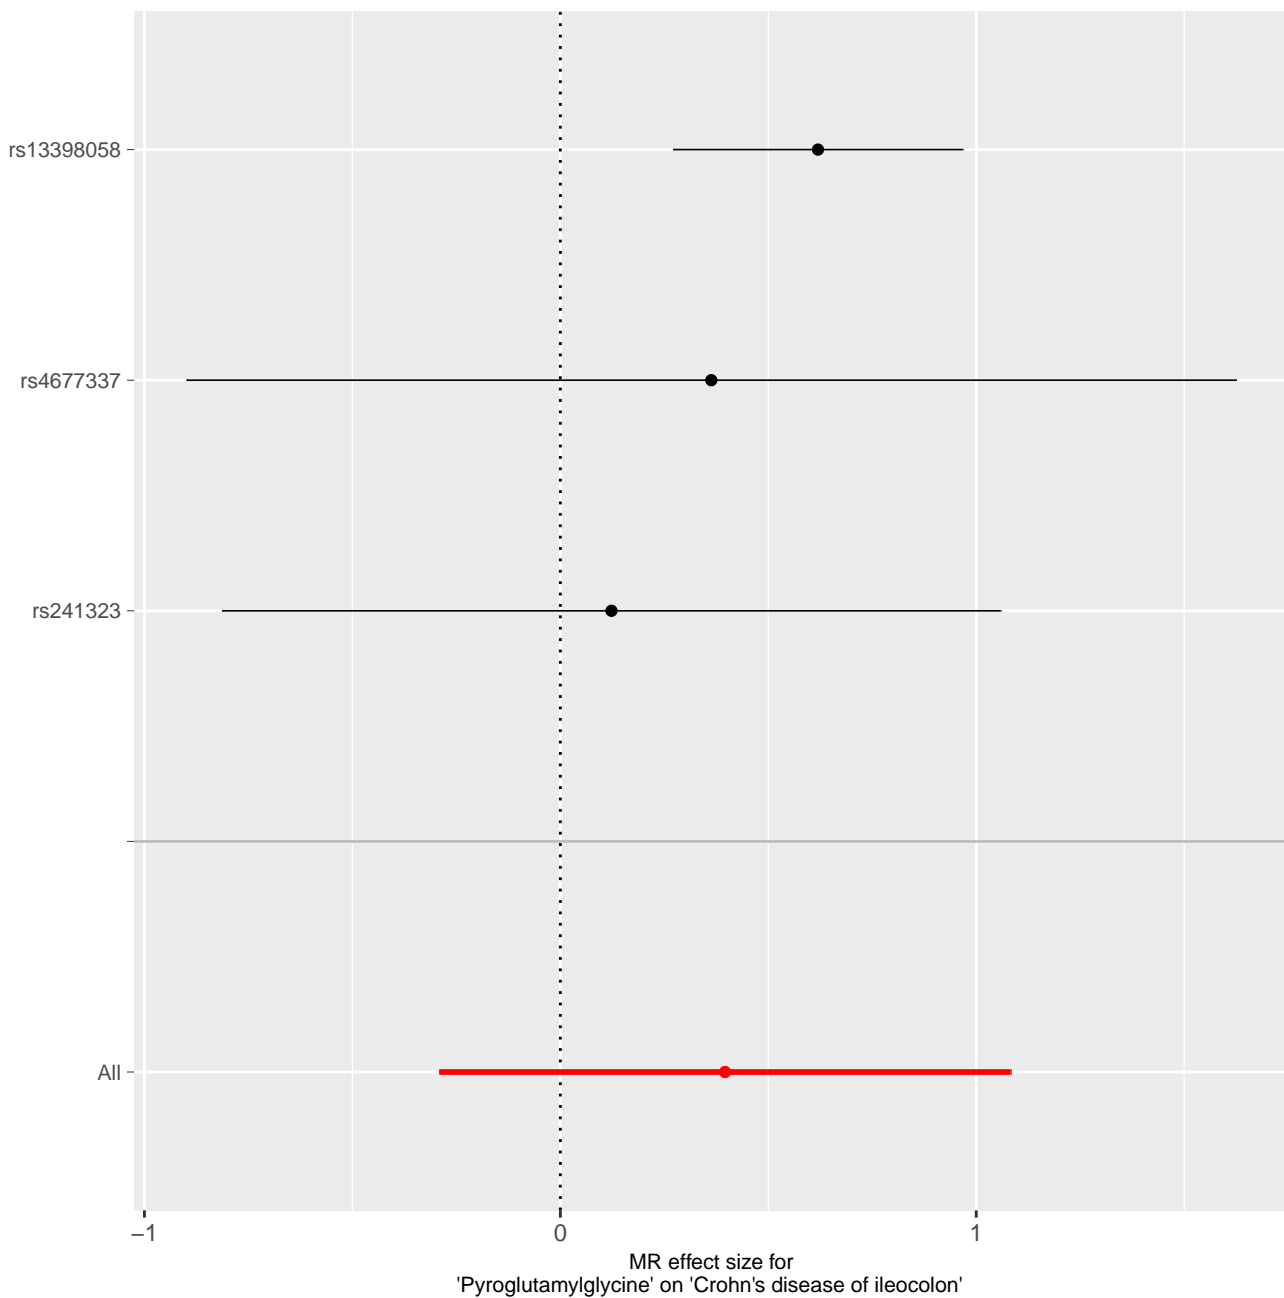

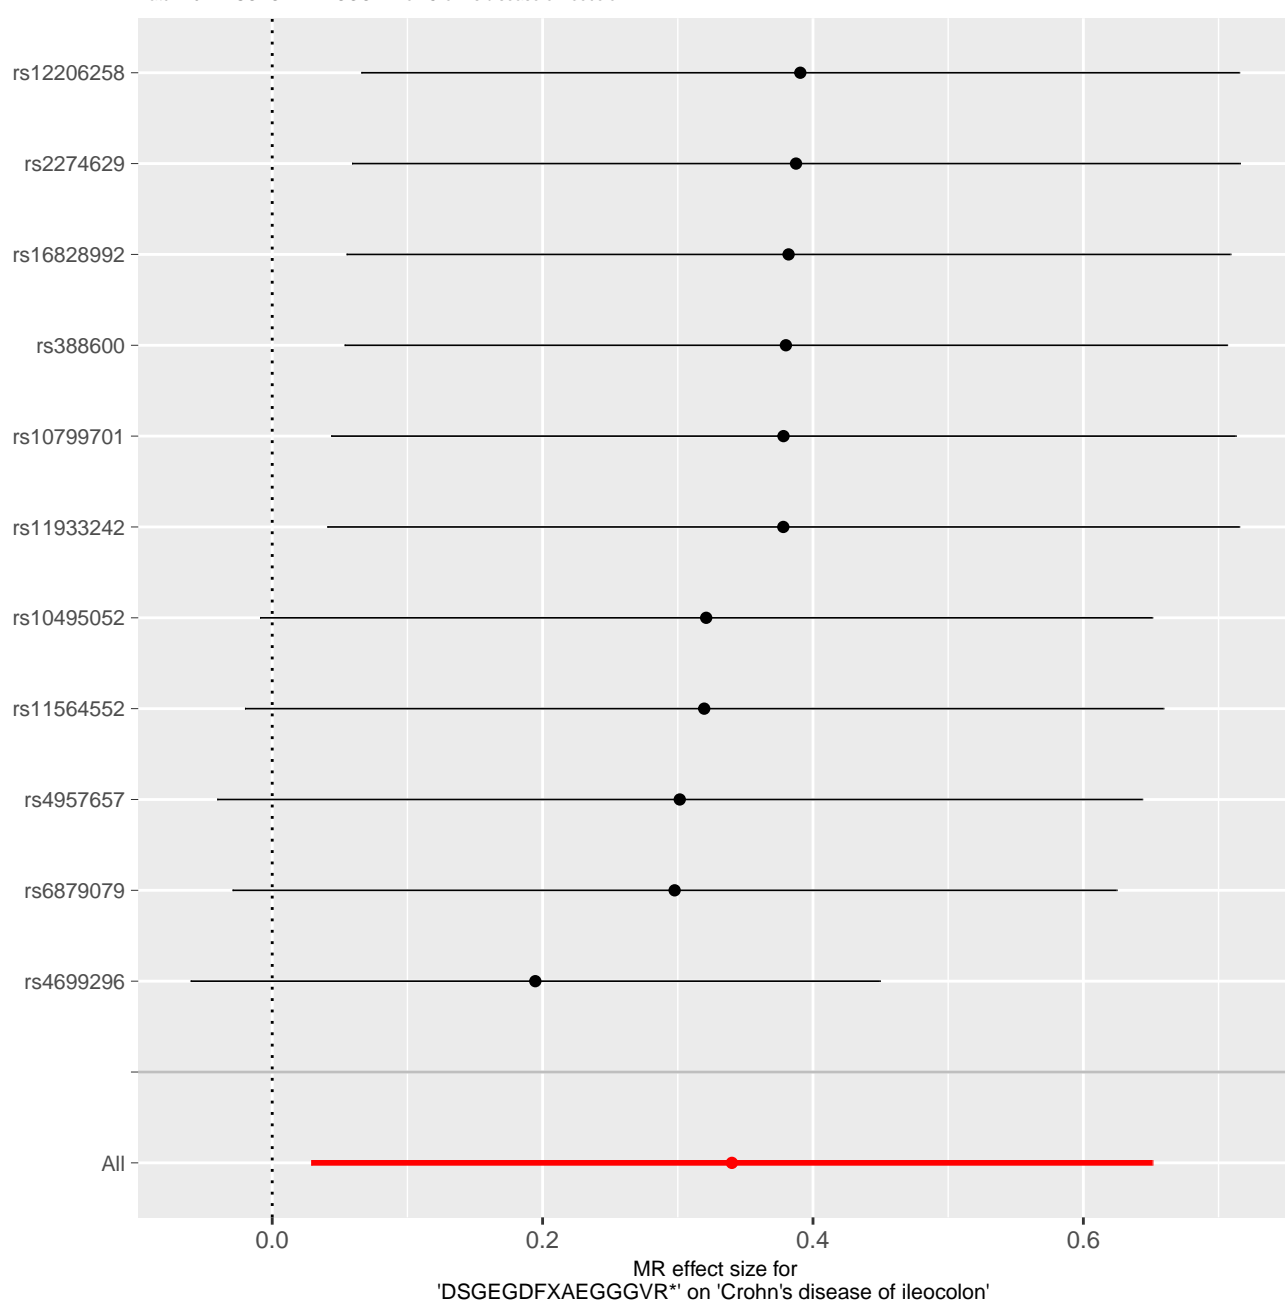



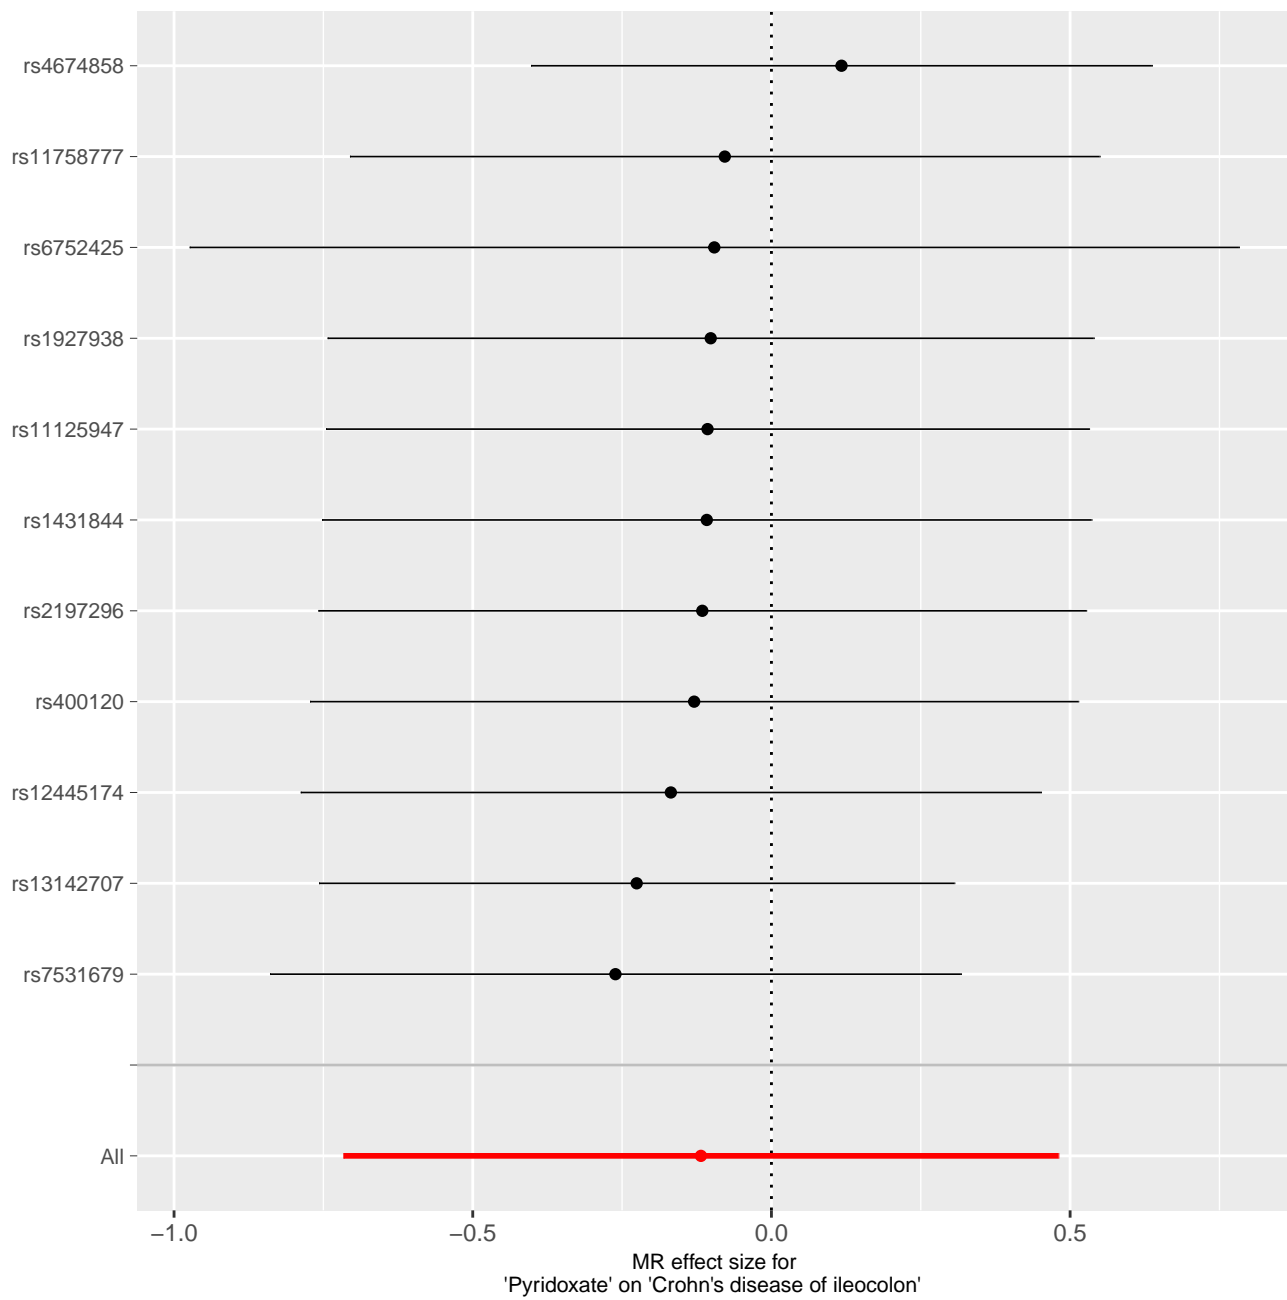

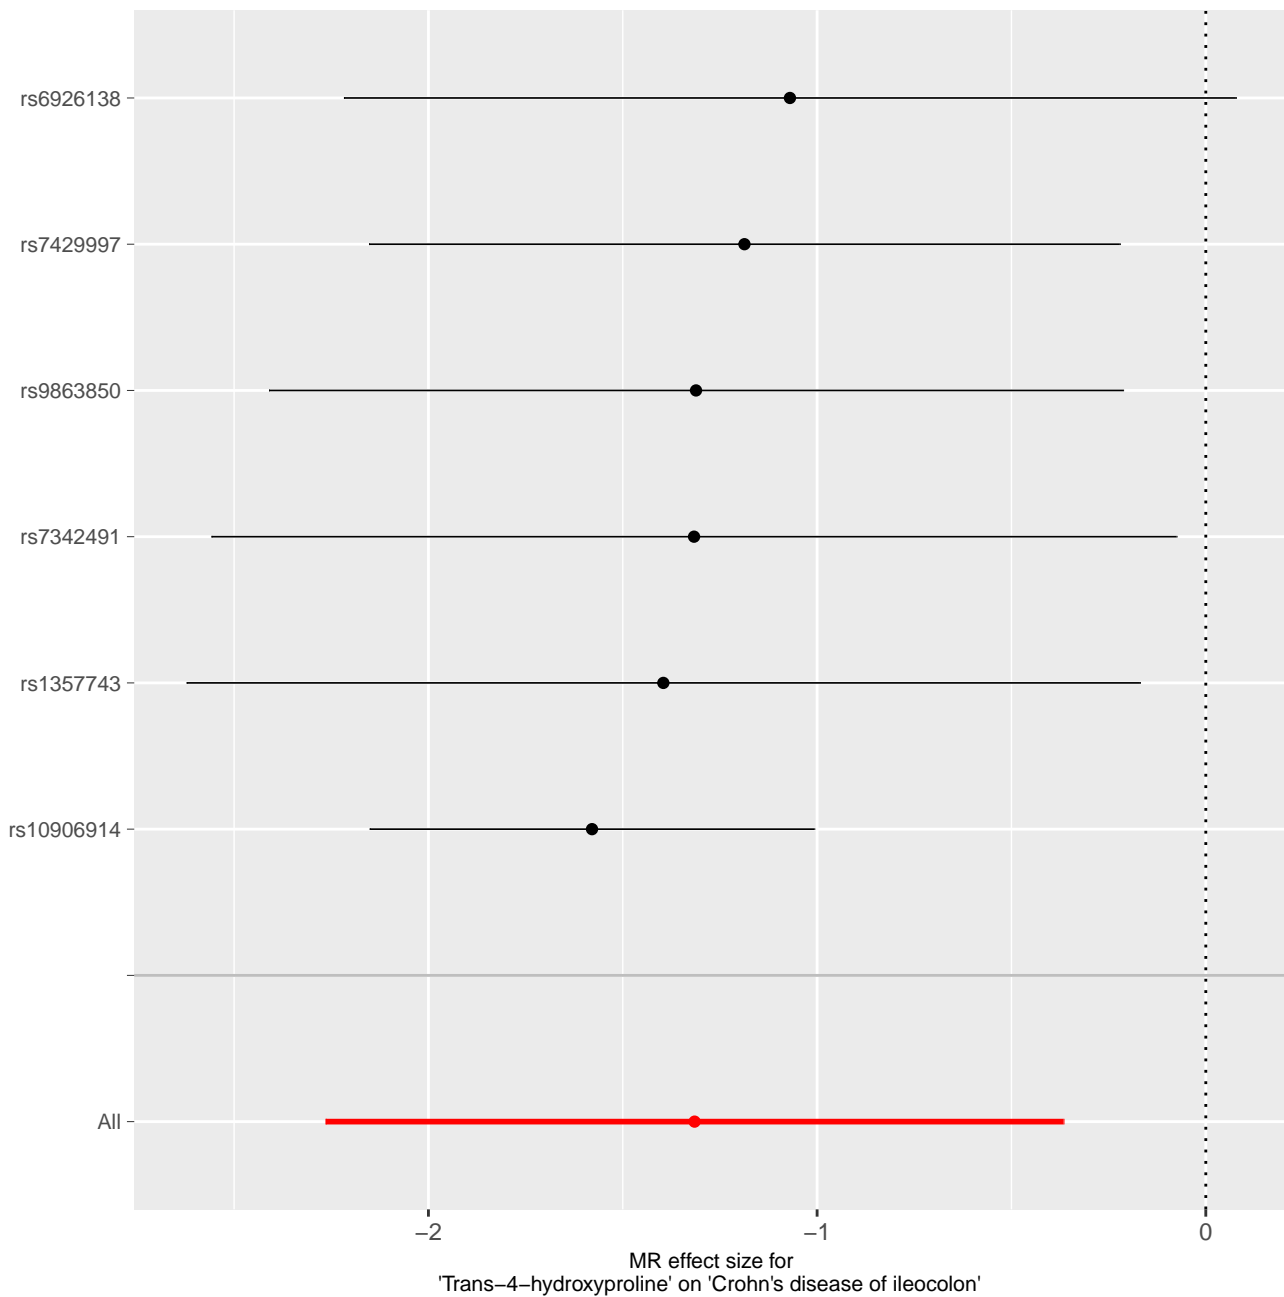

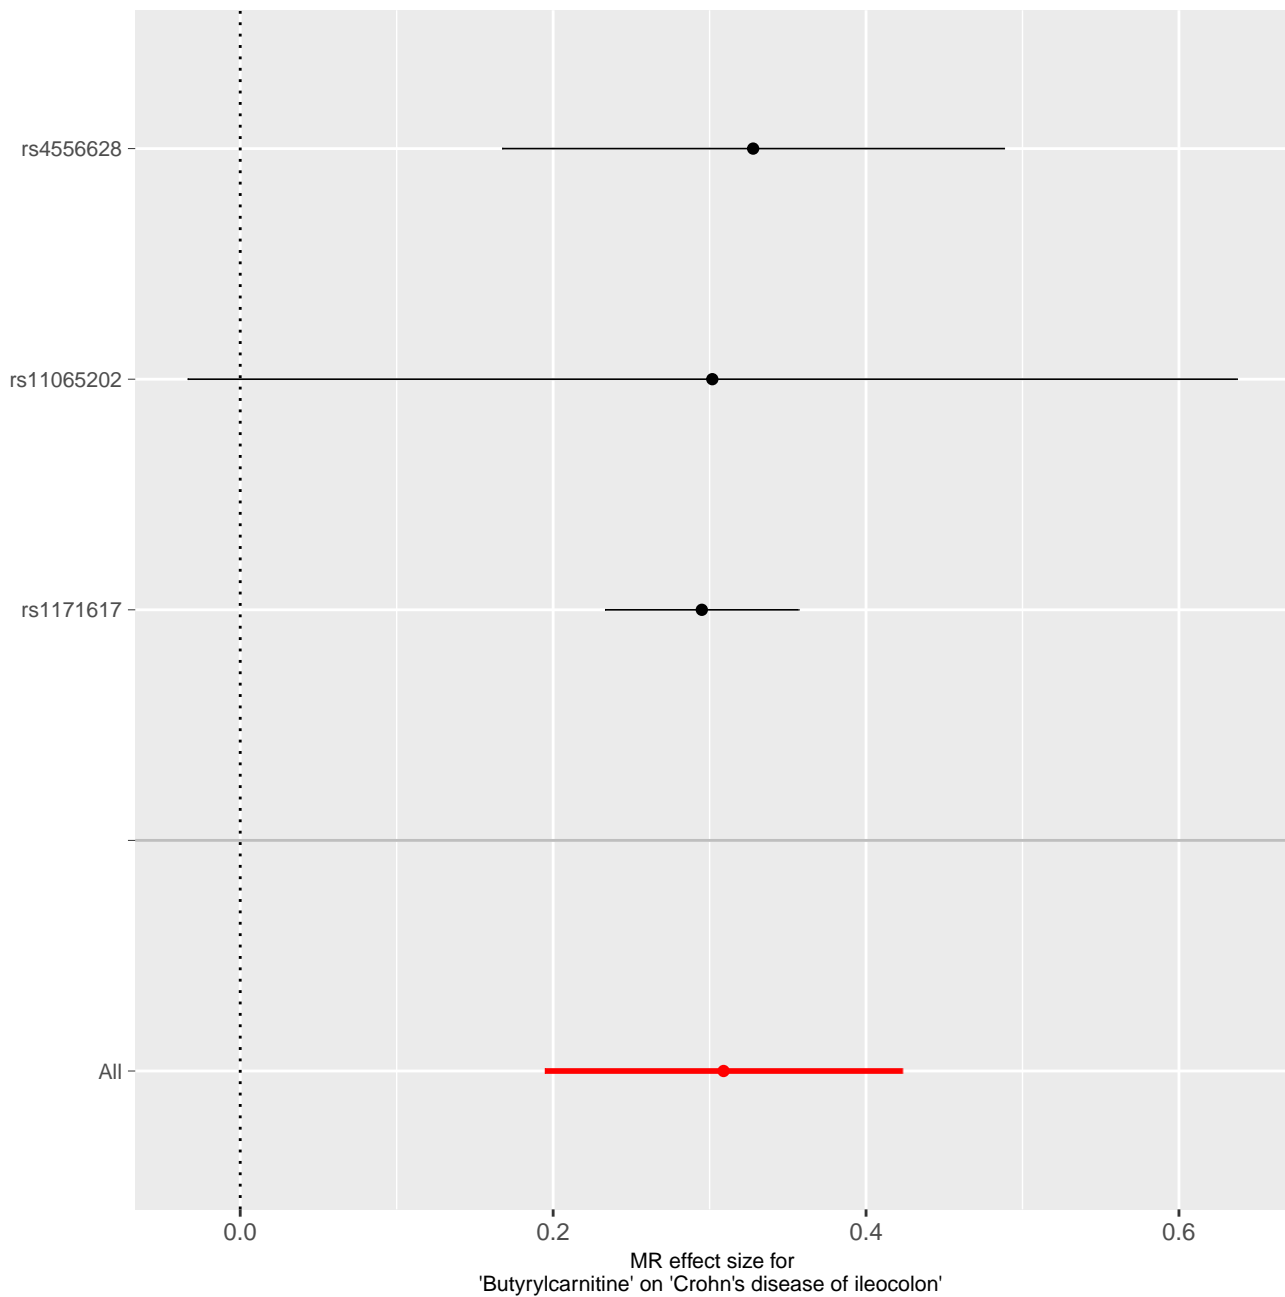

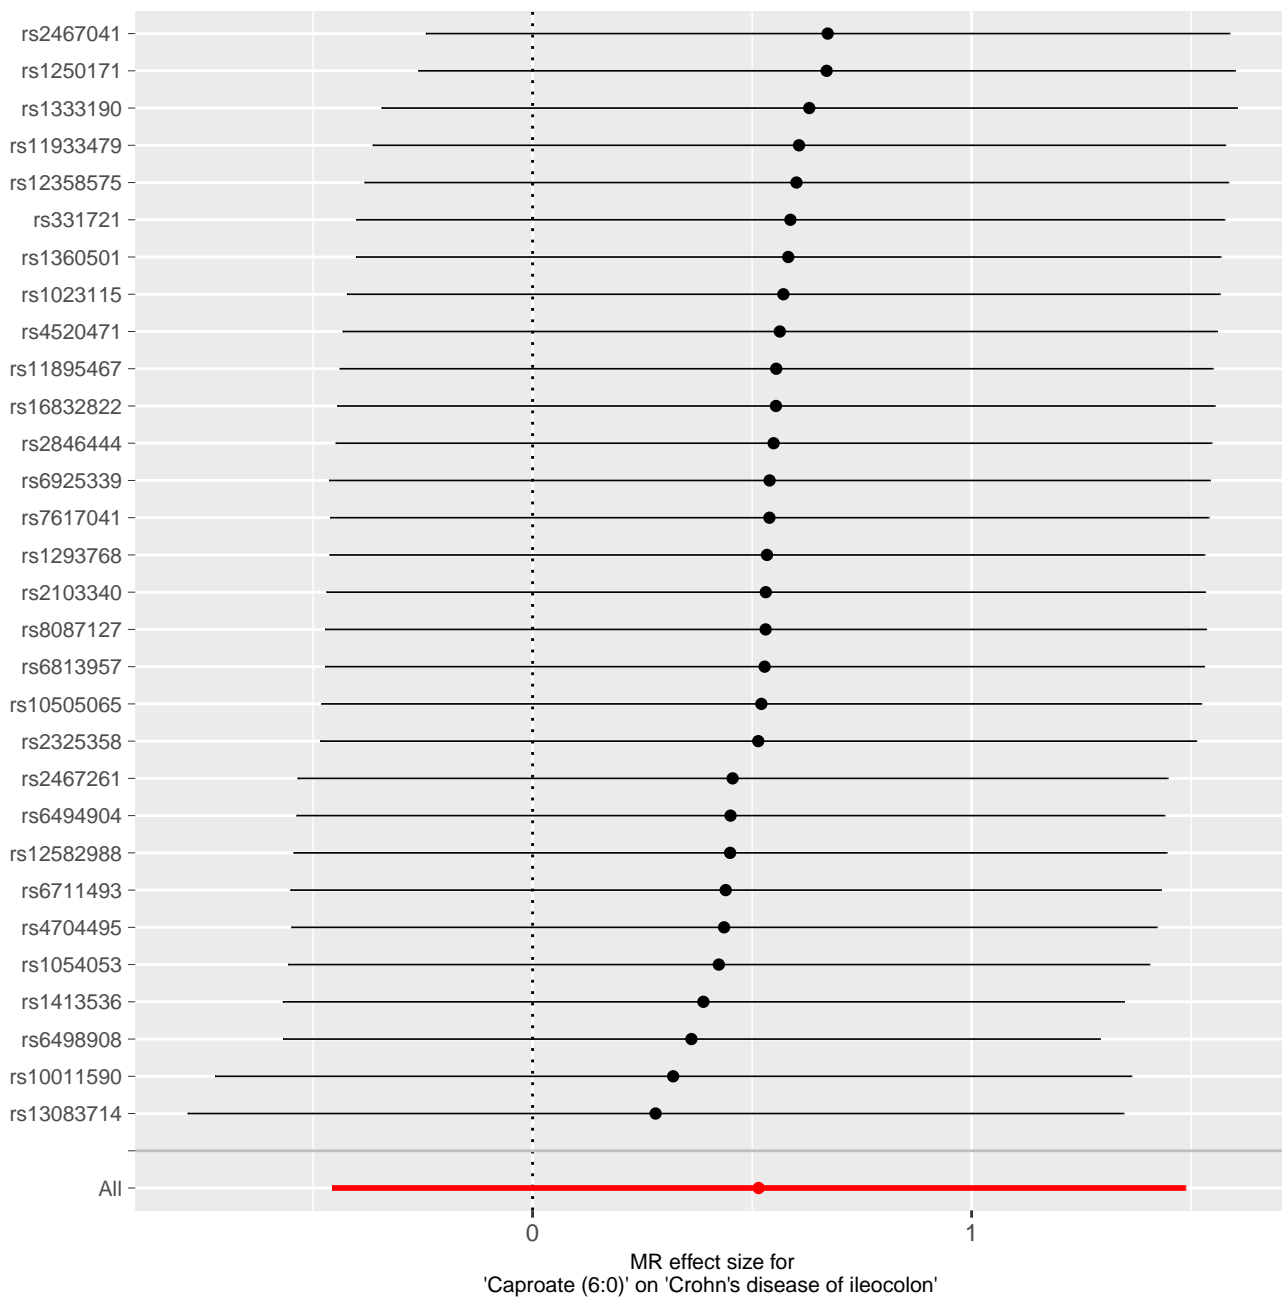

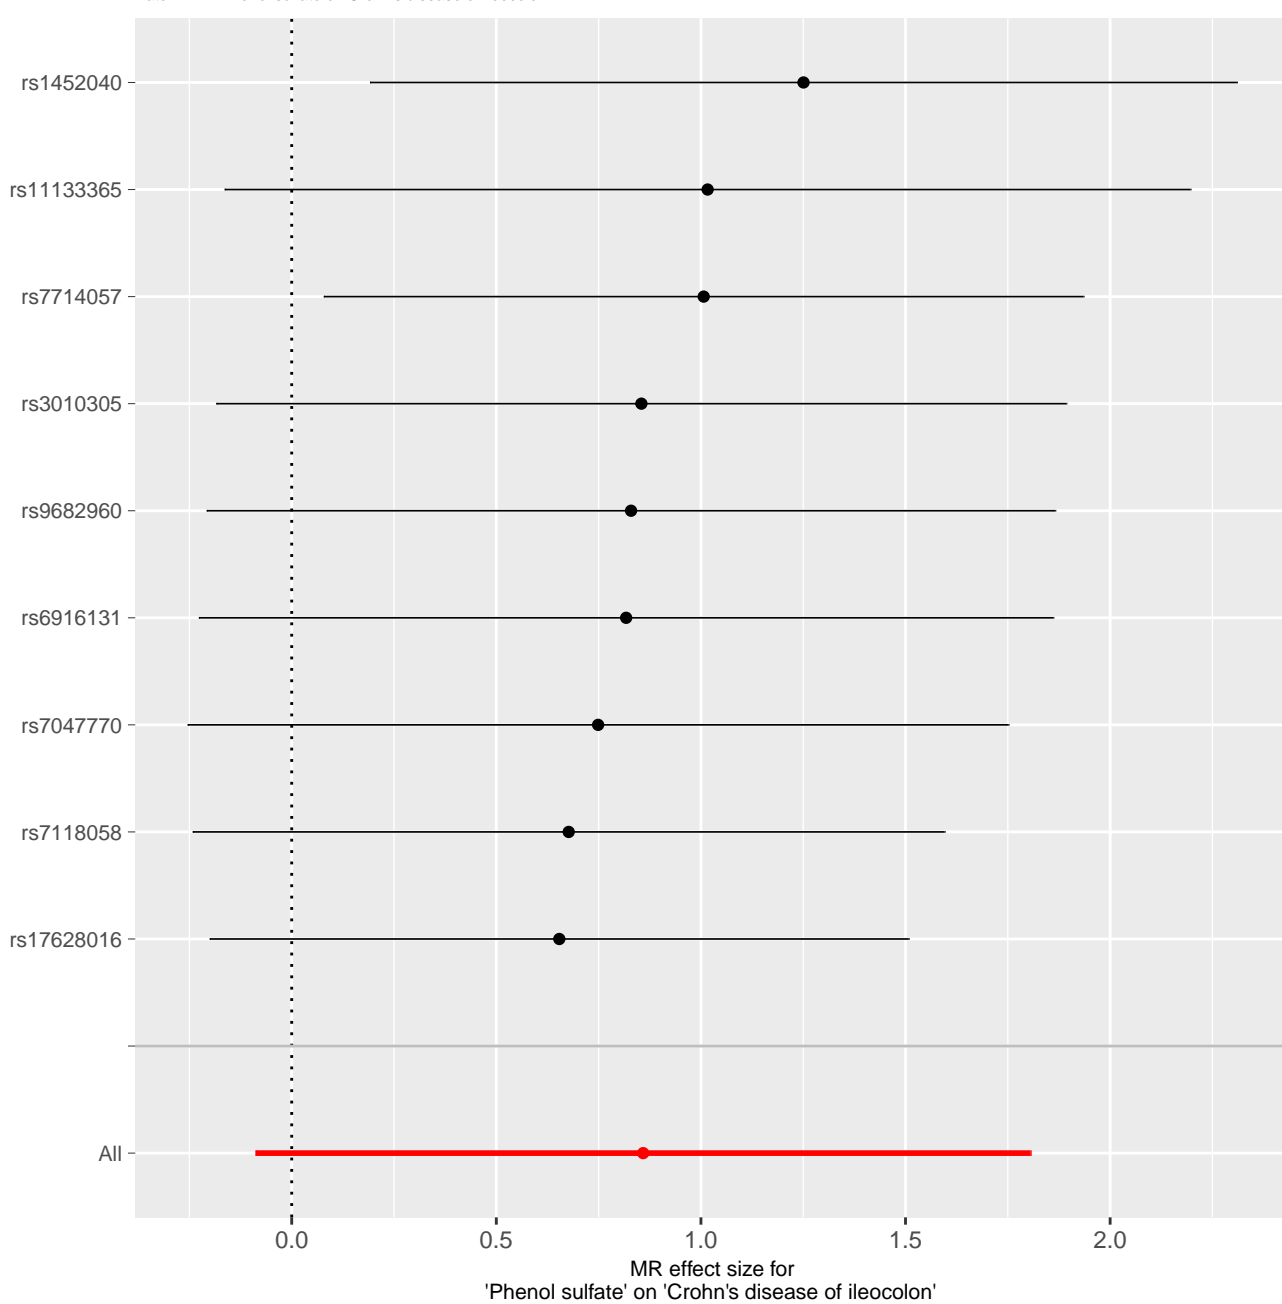

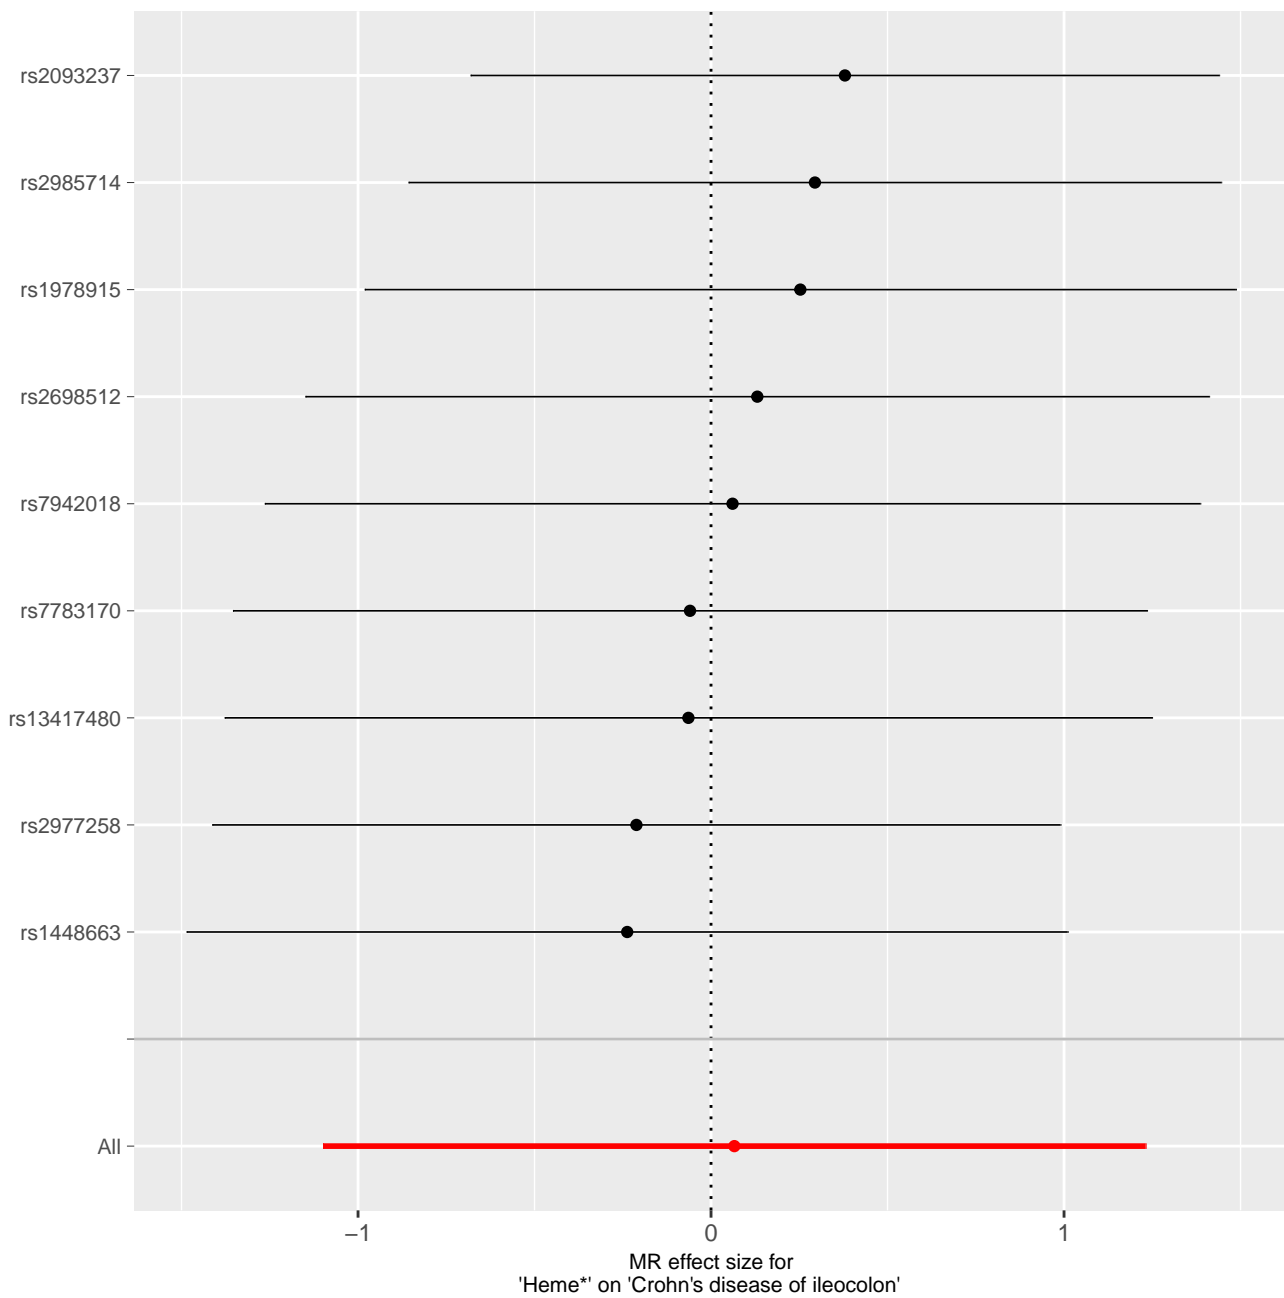

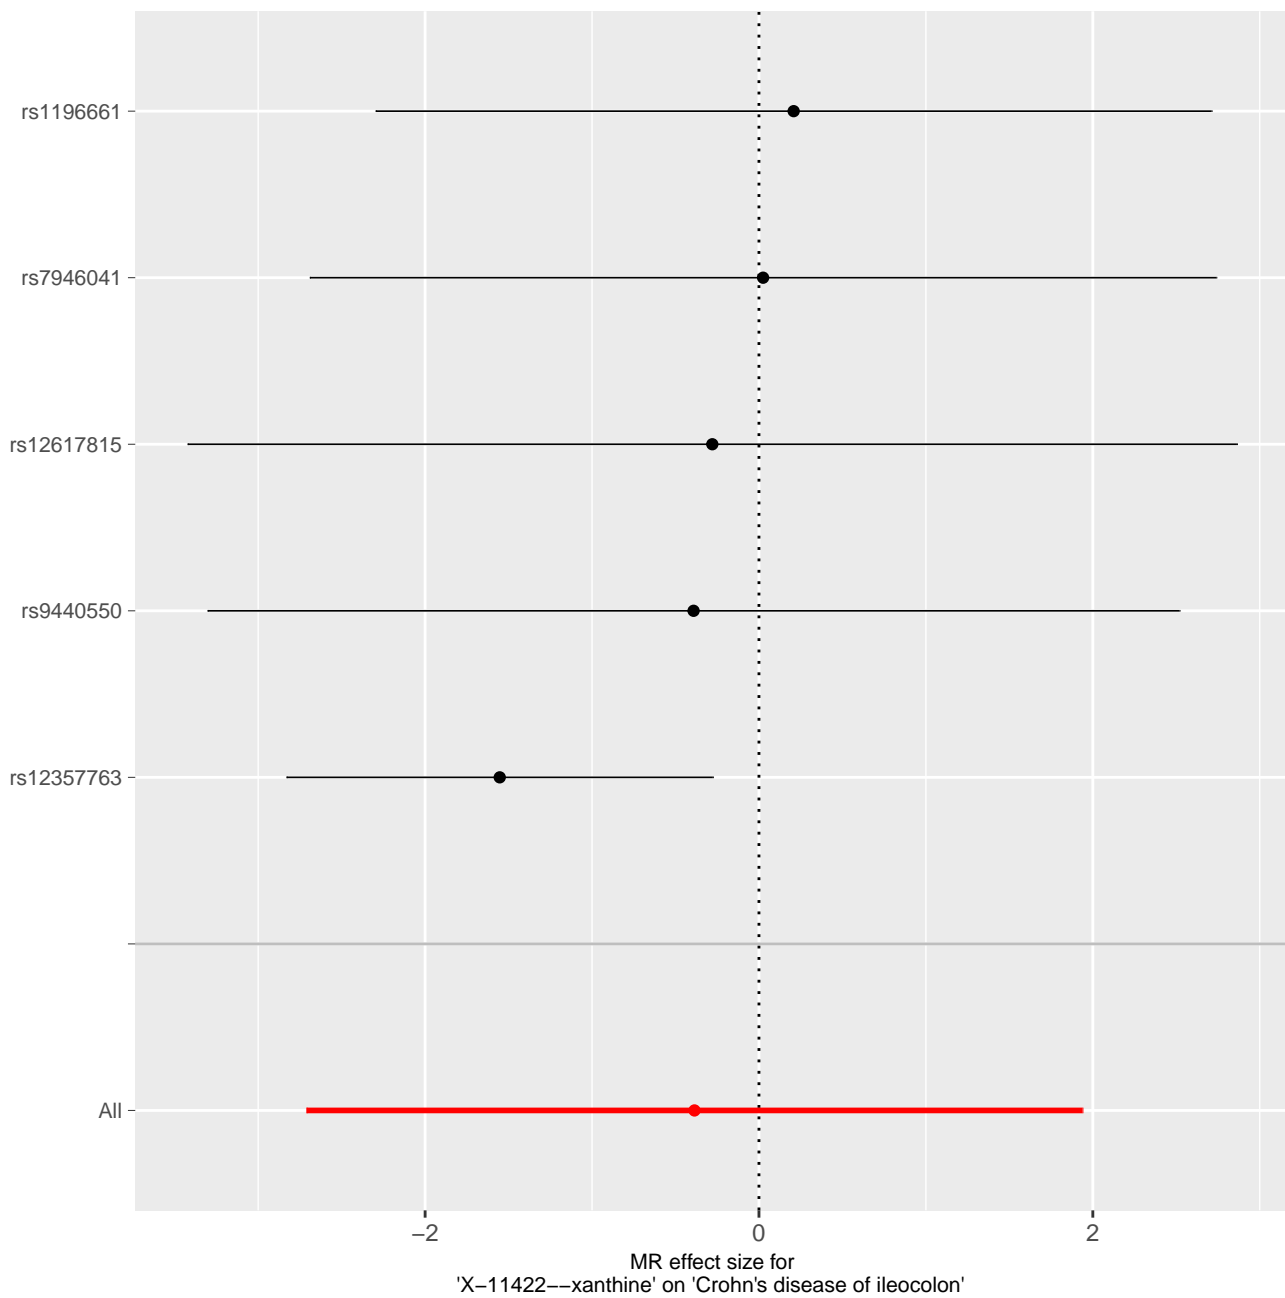

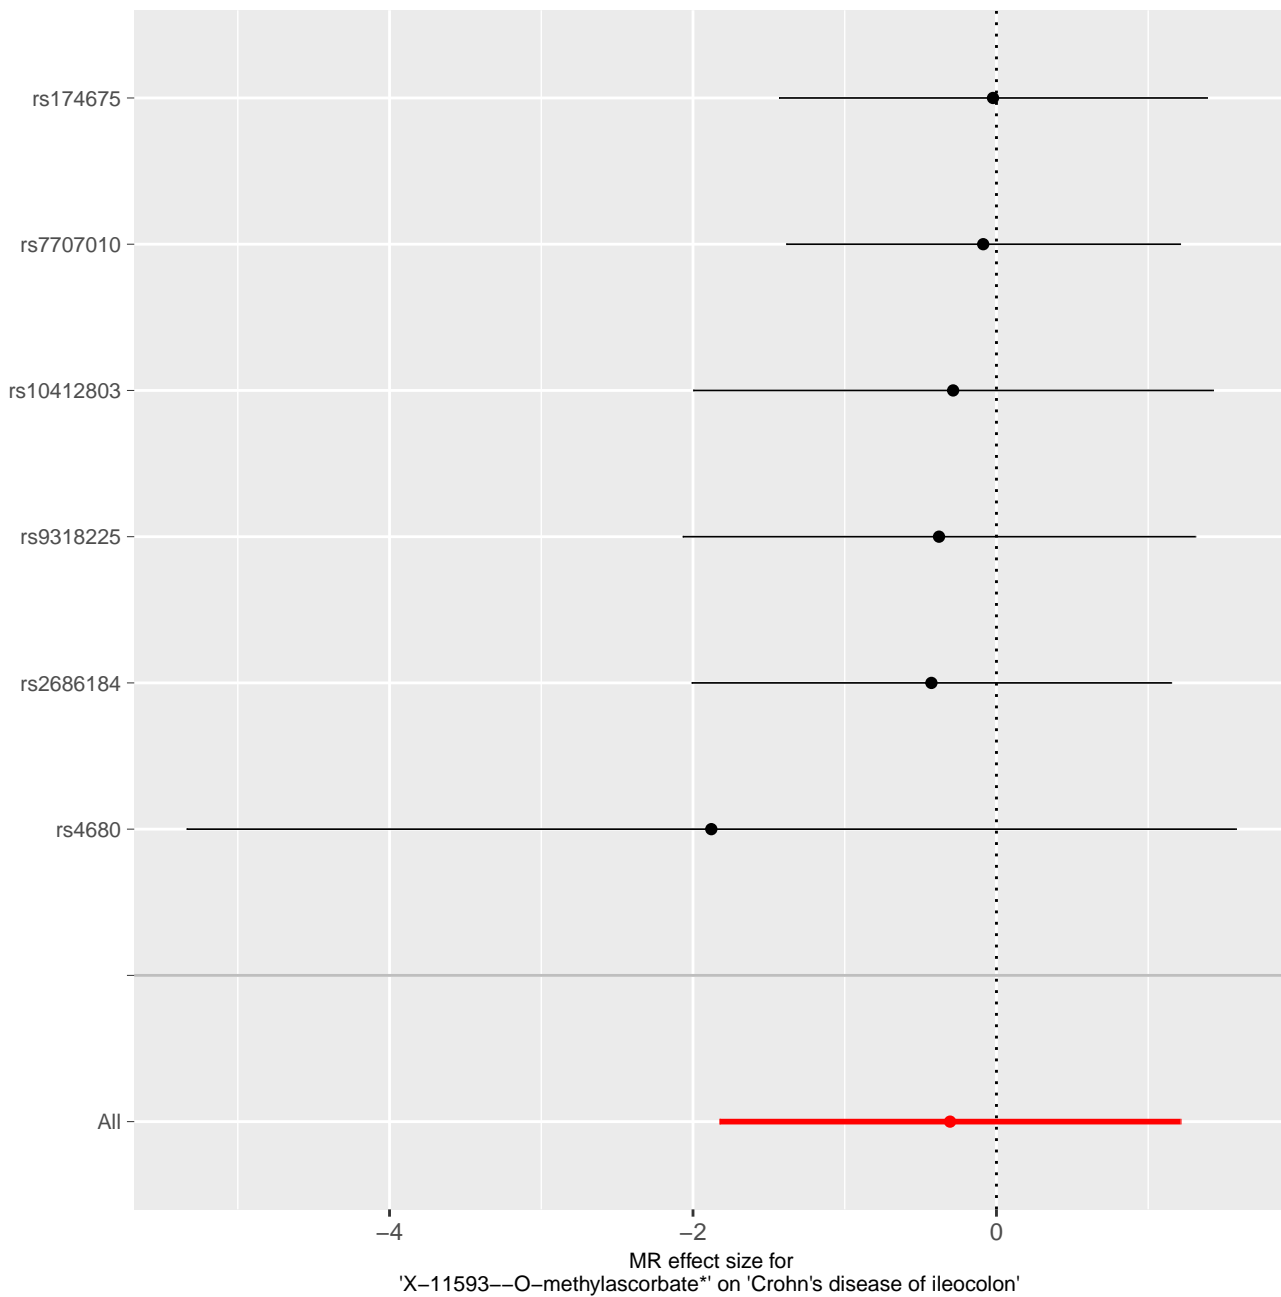



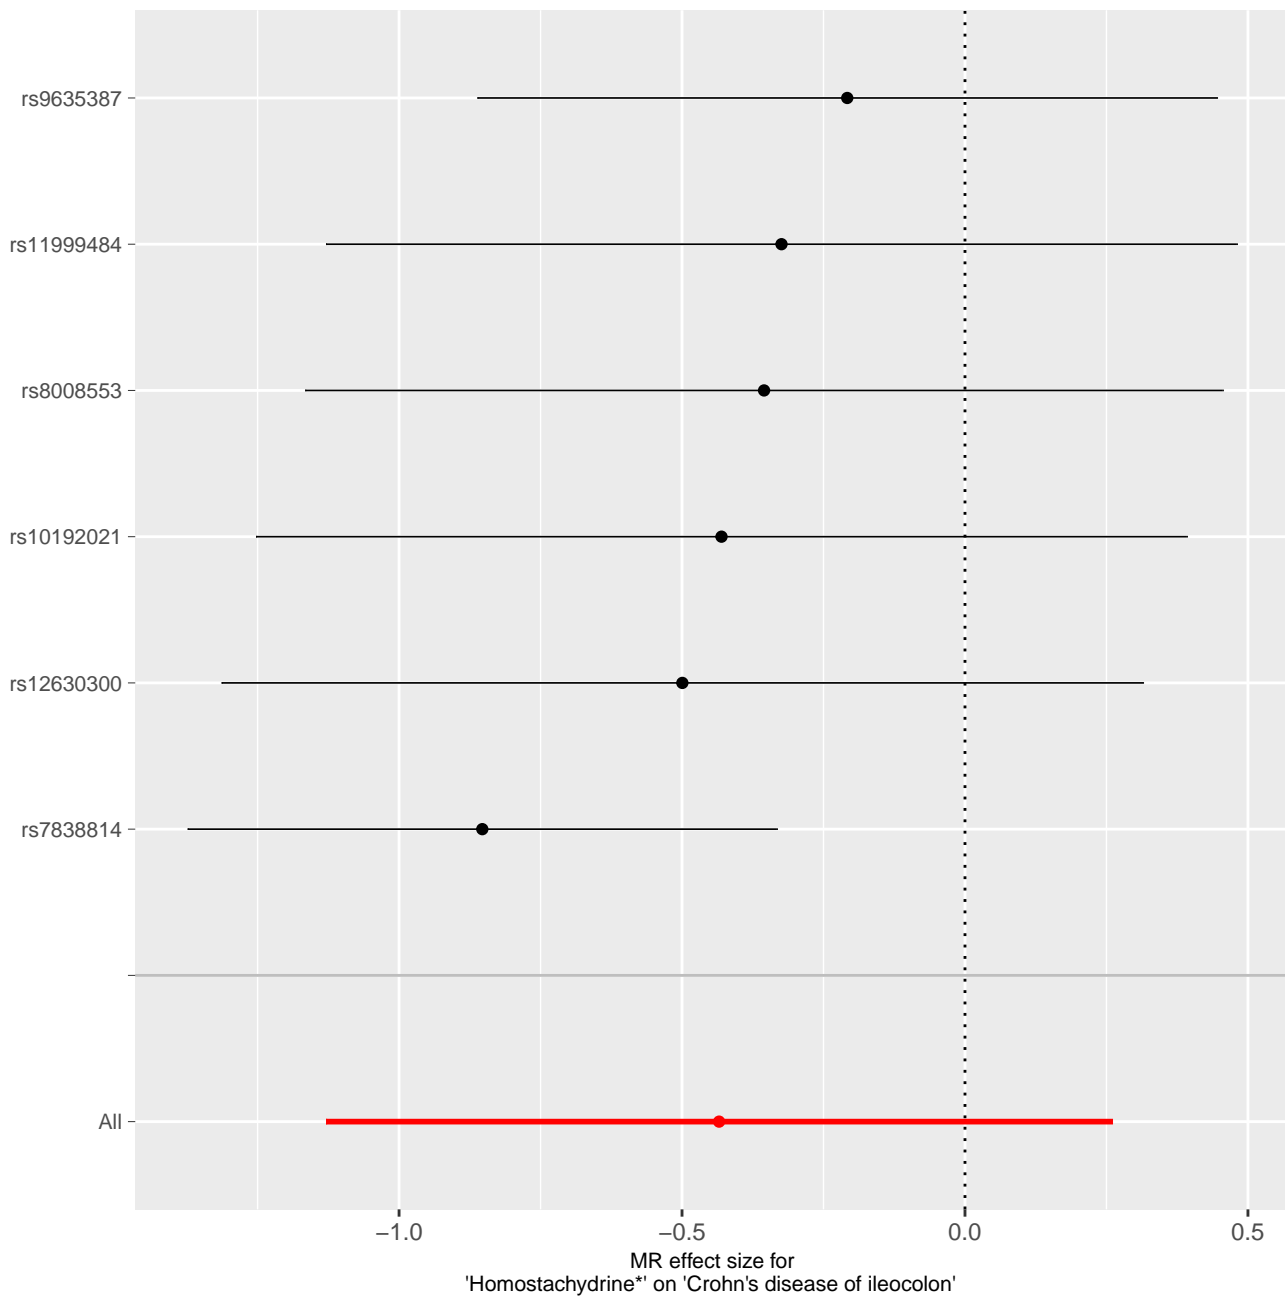

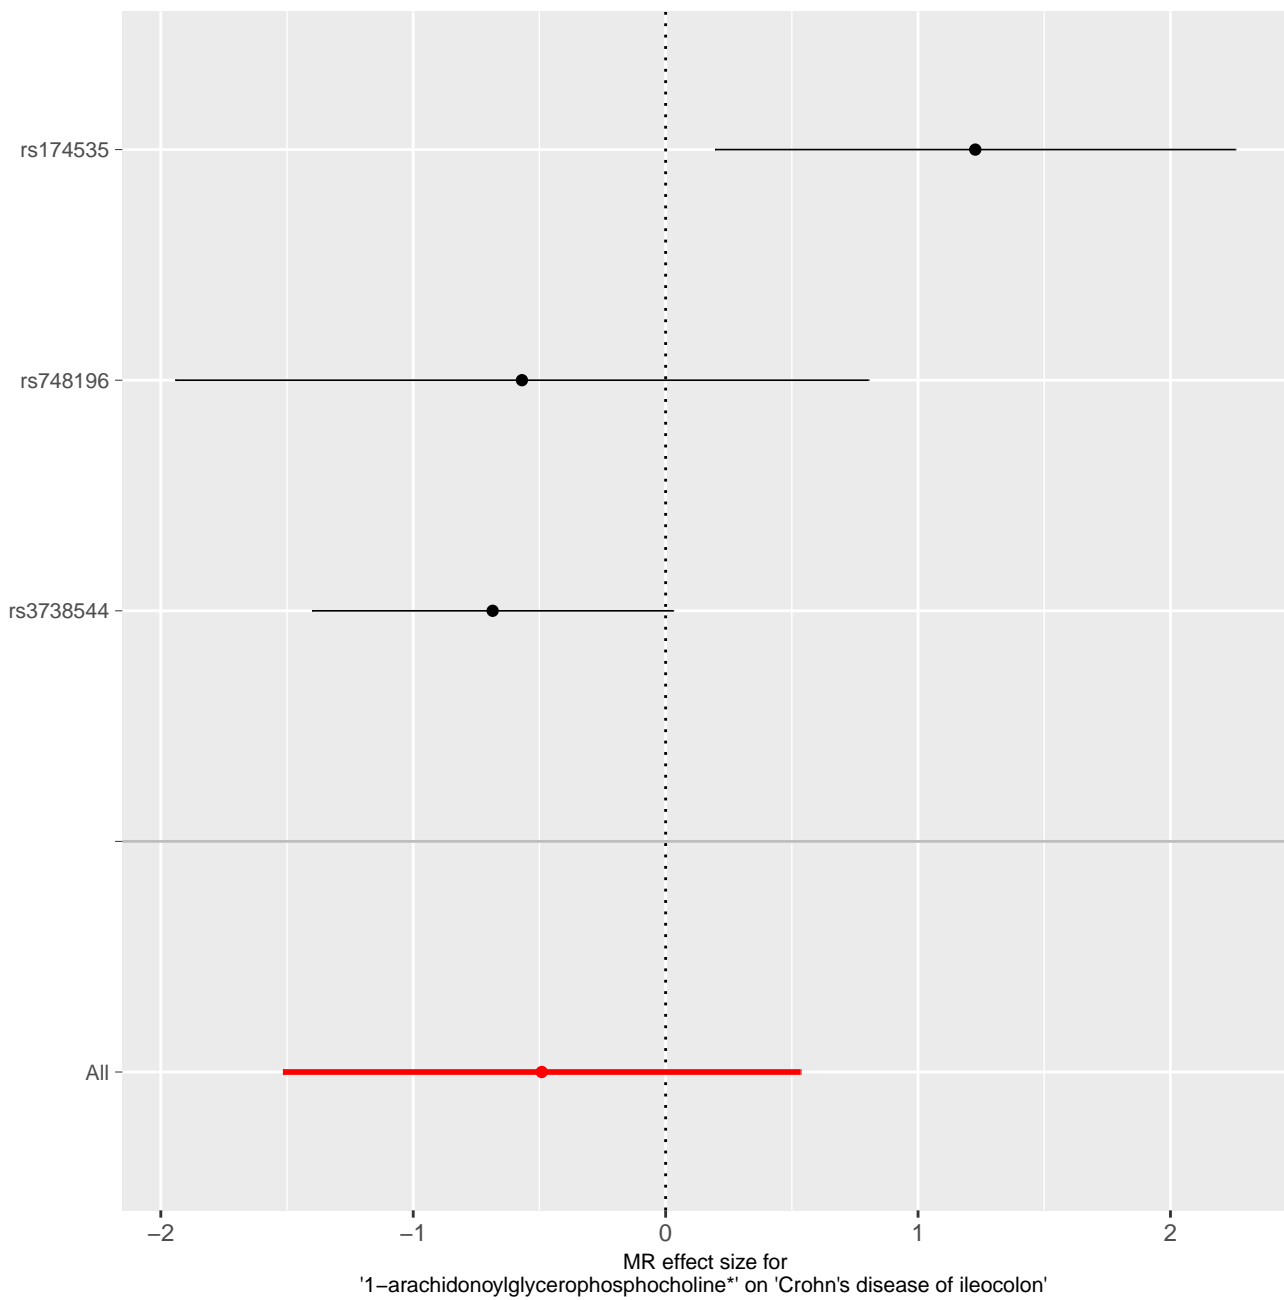

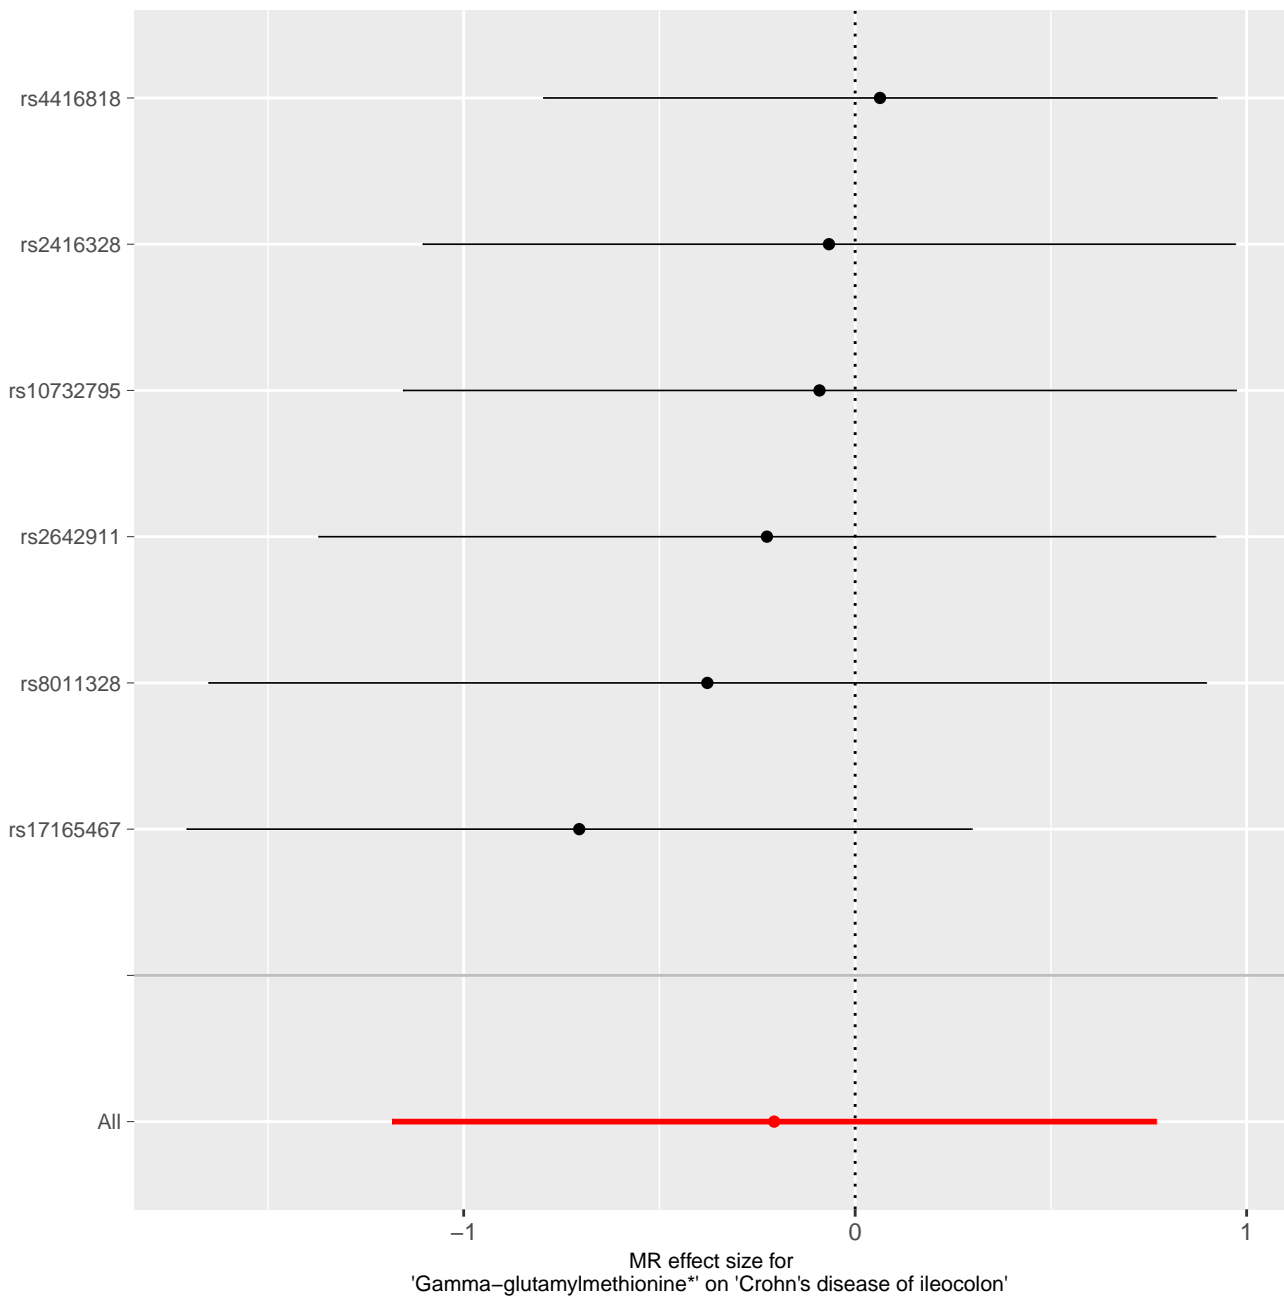

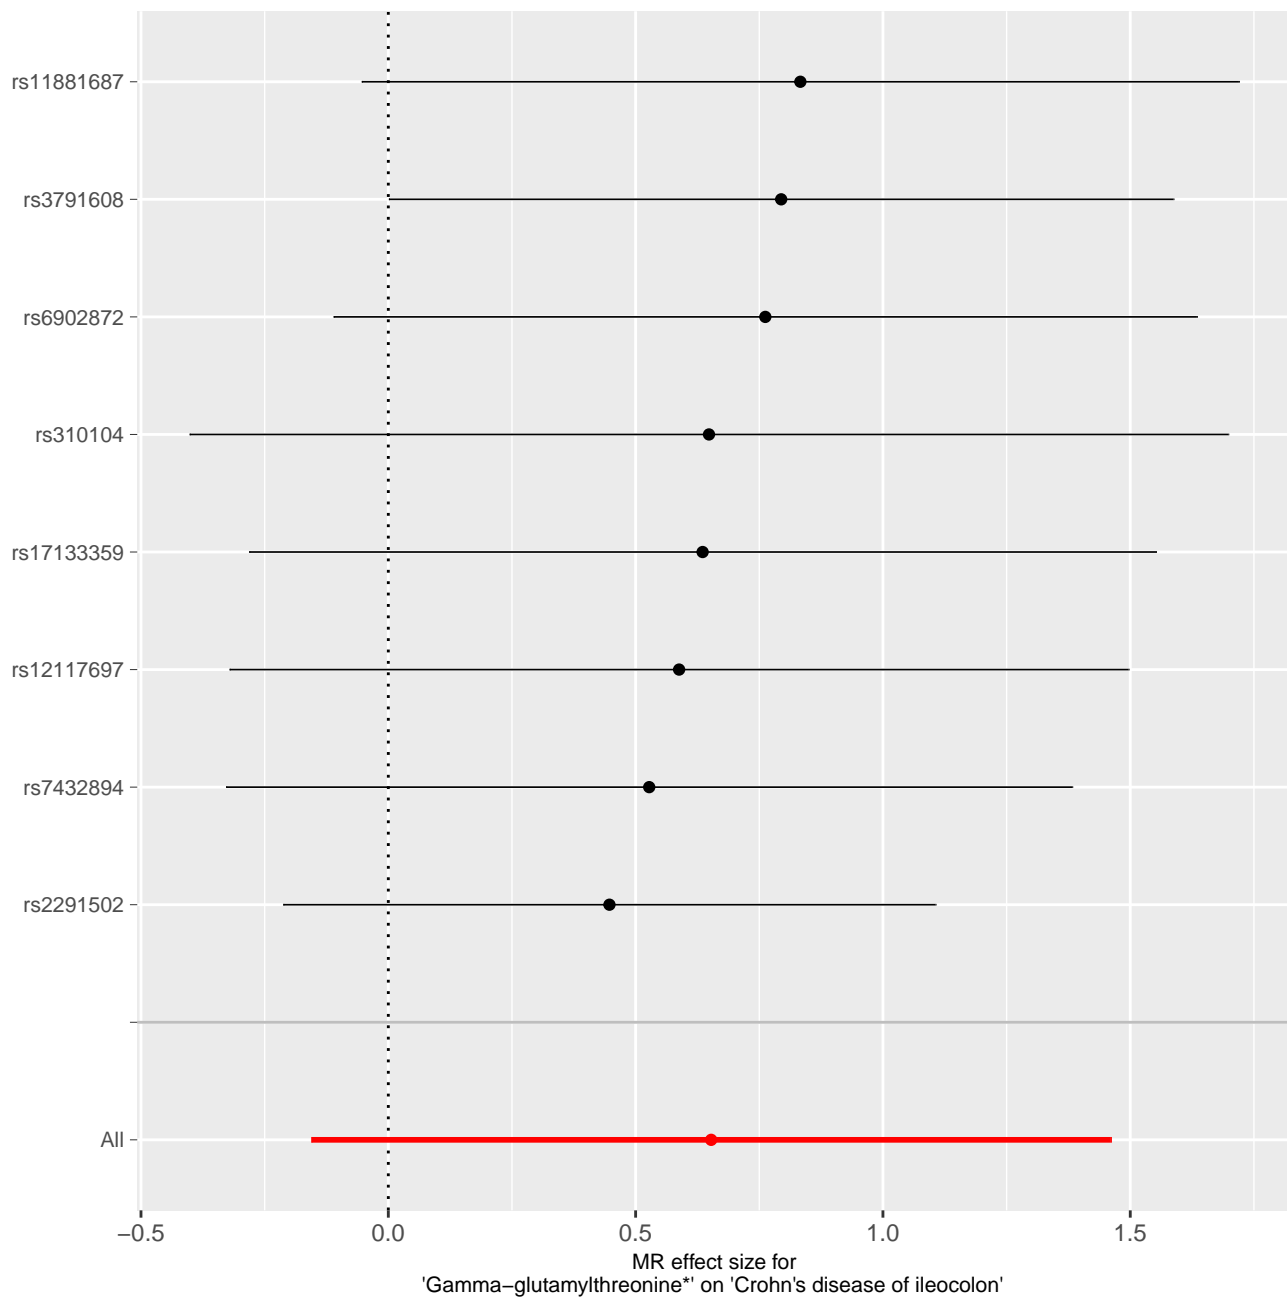

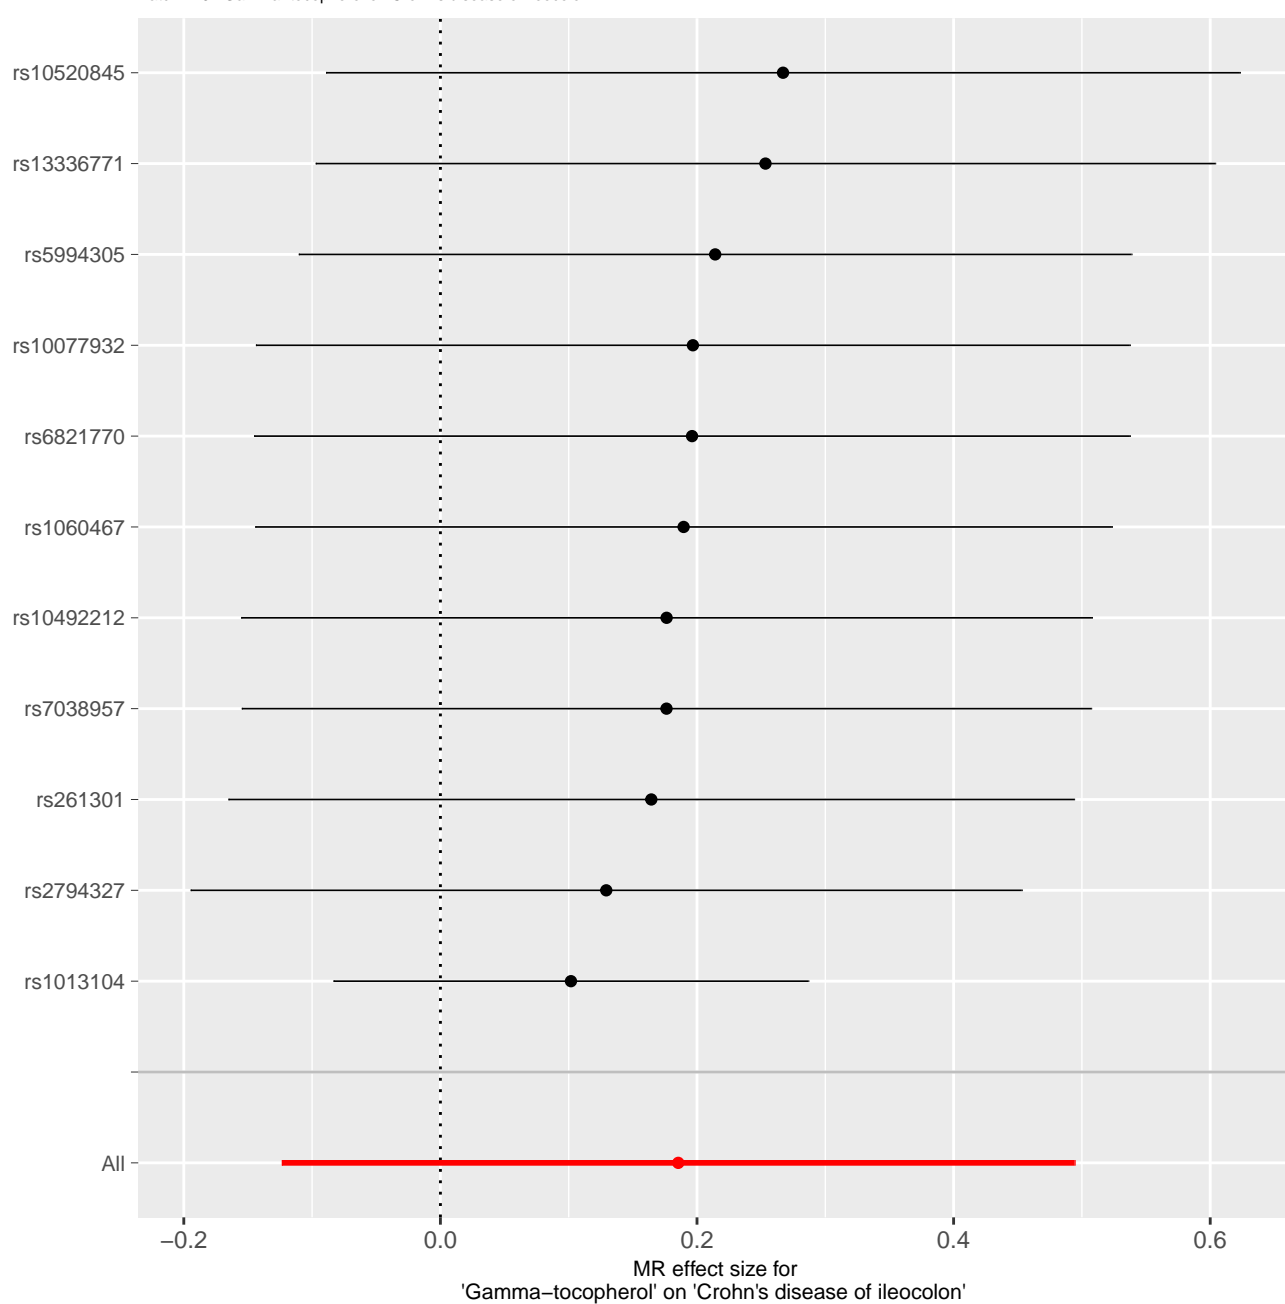

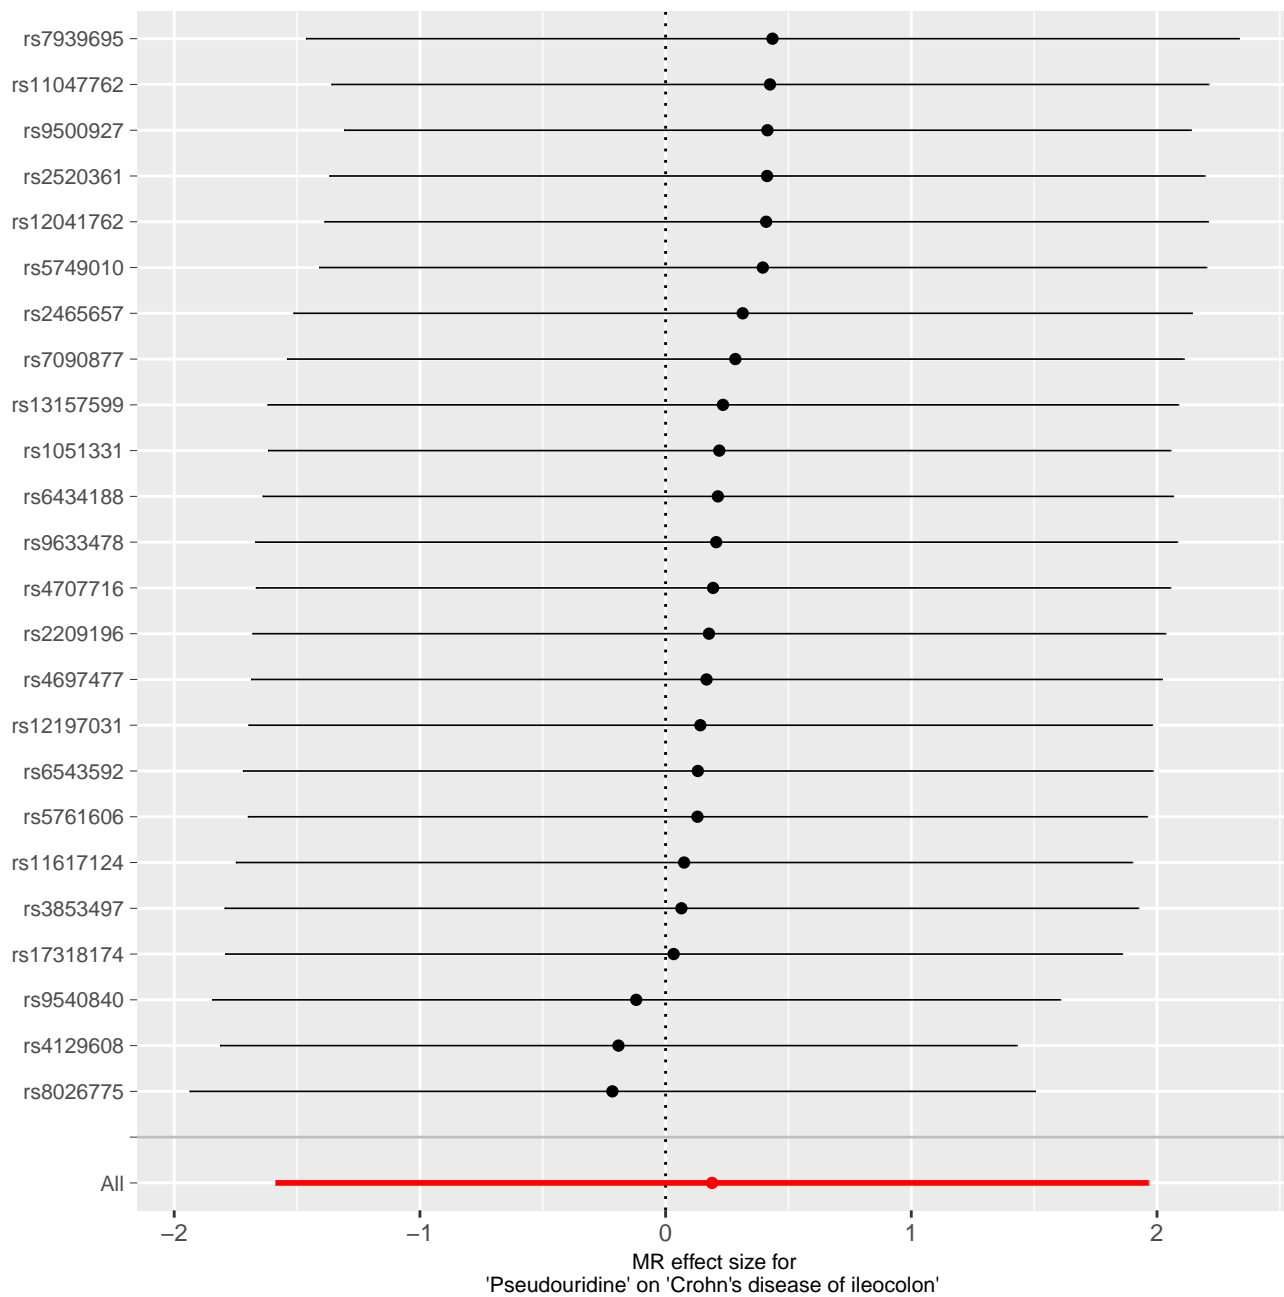

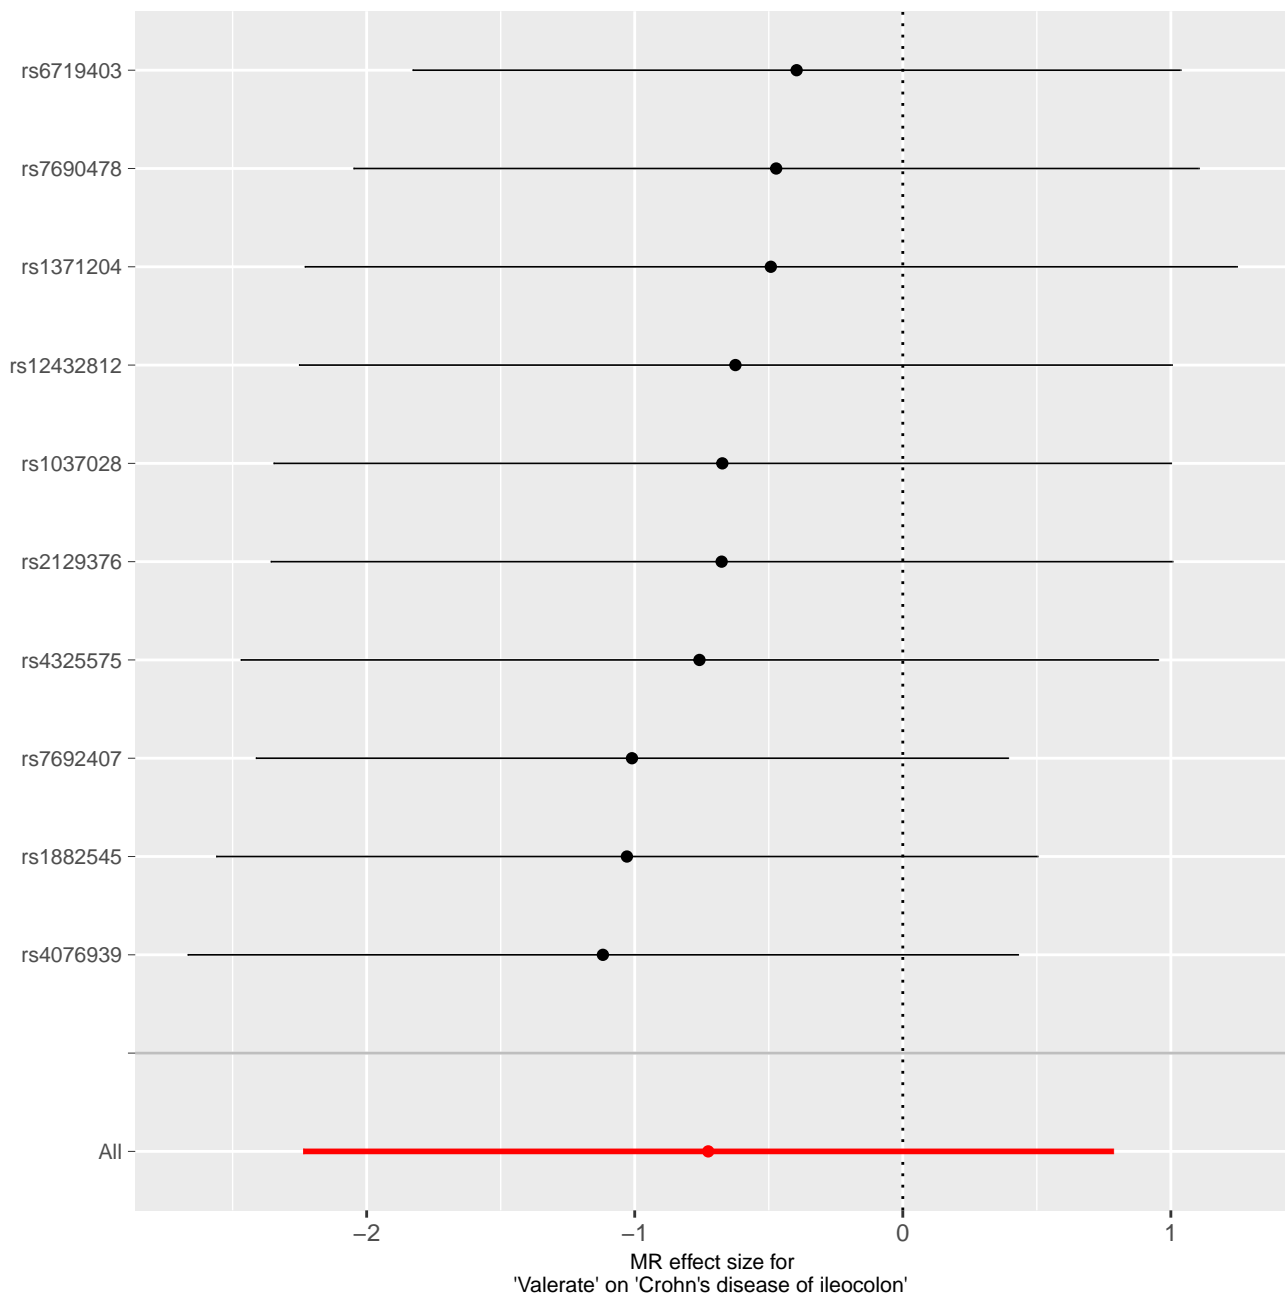

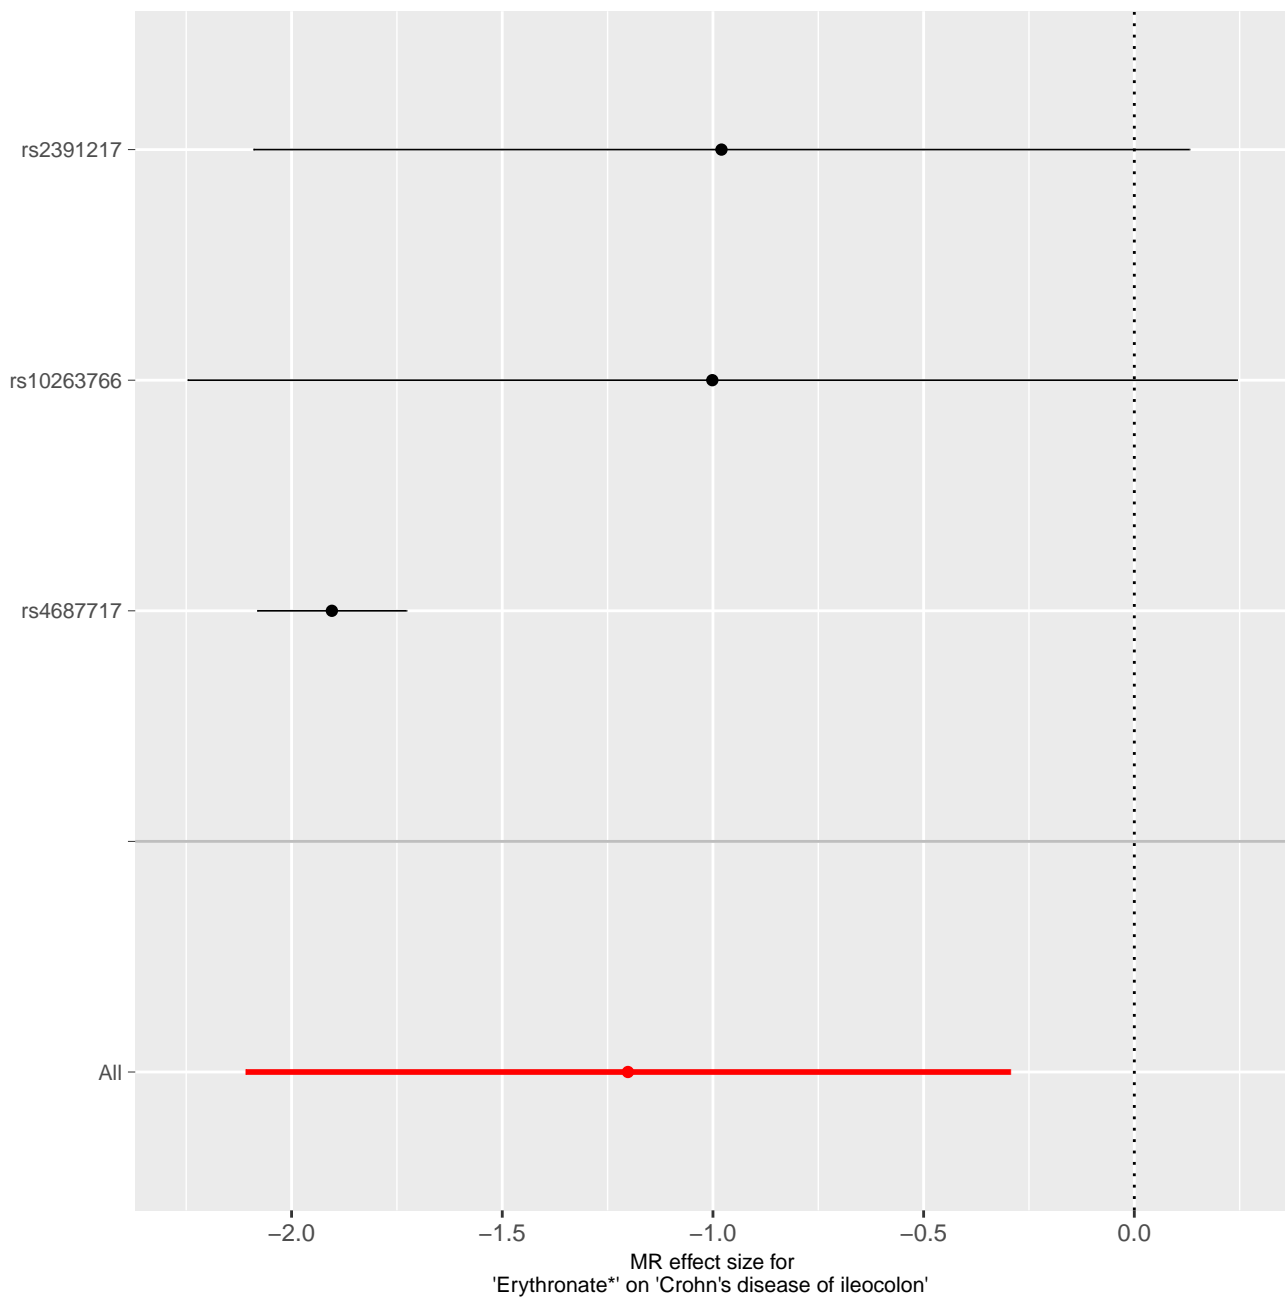



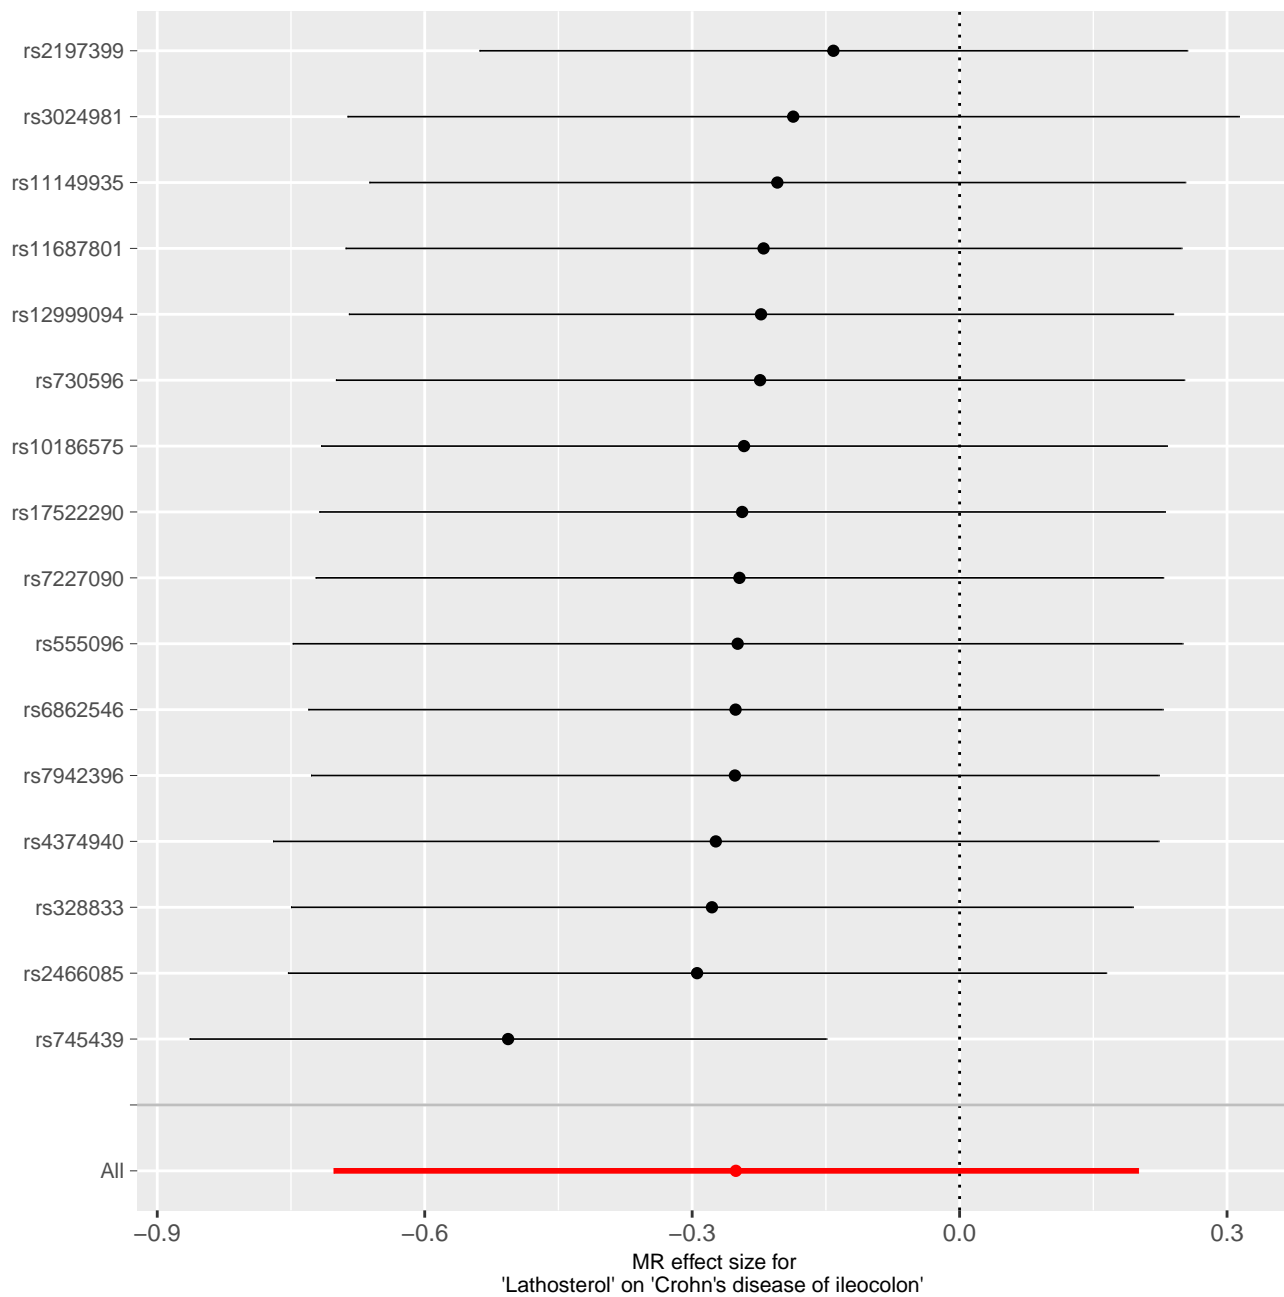

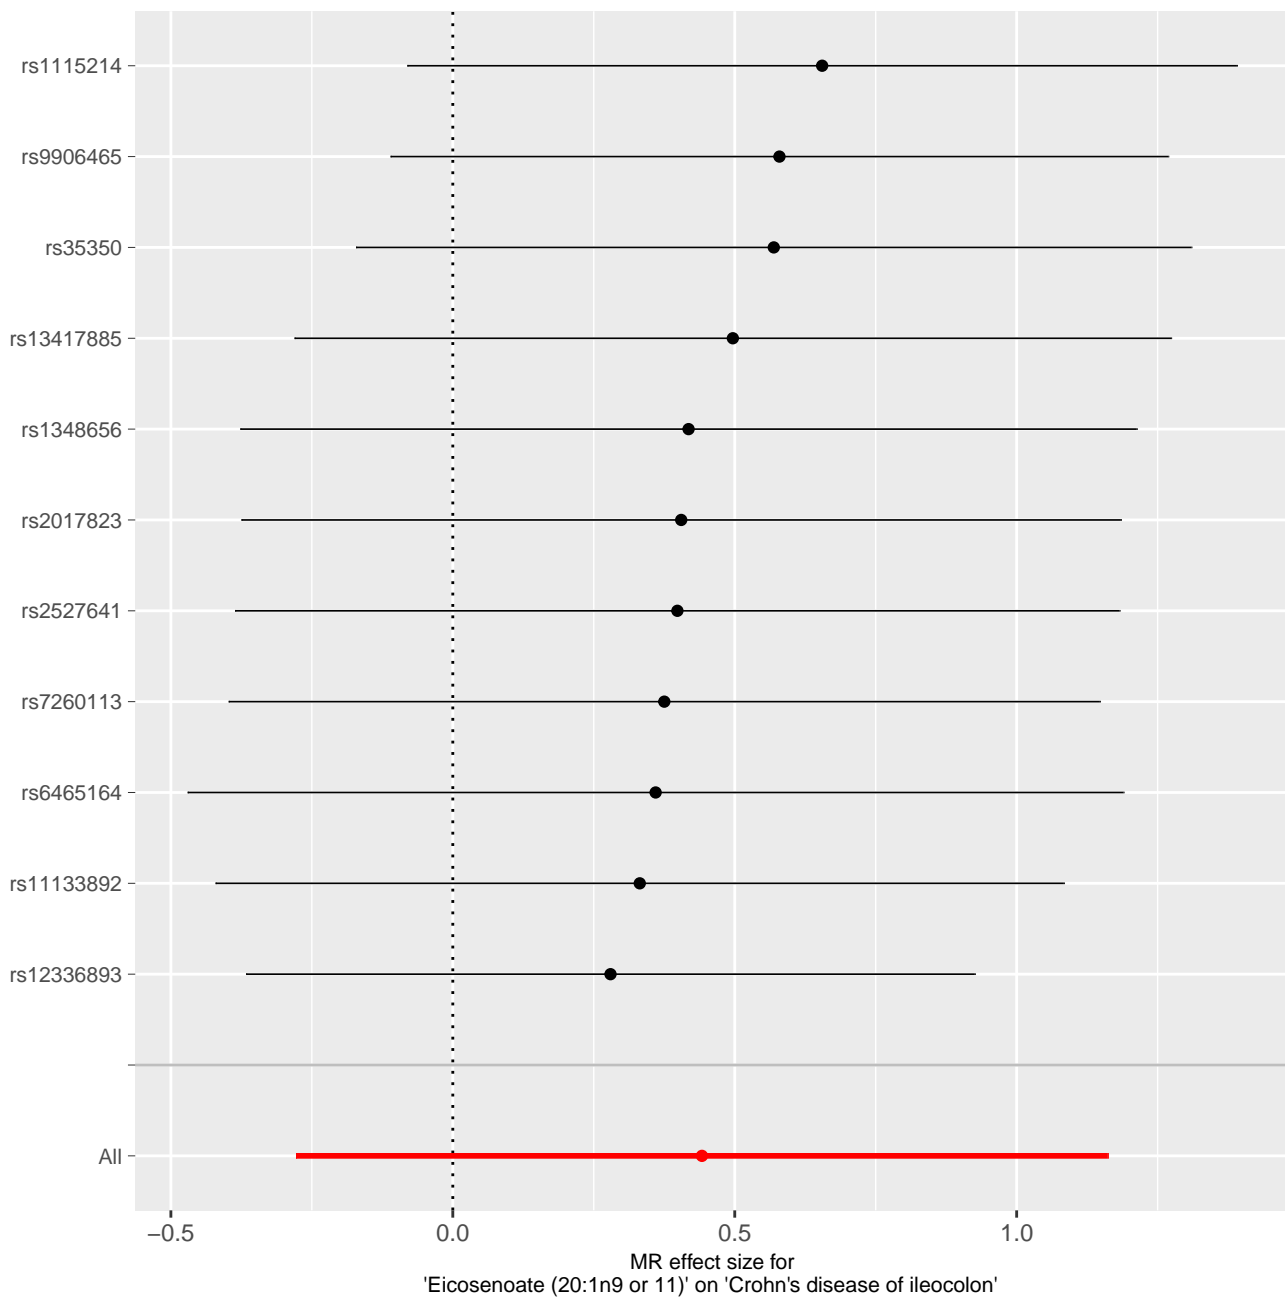

rs8002180

rs7775554

rs6804368

All

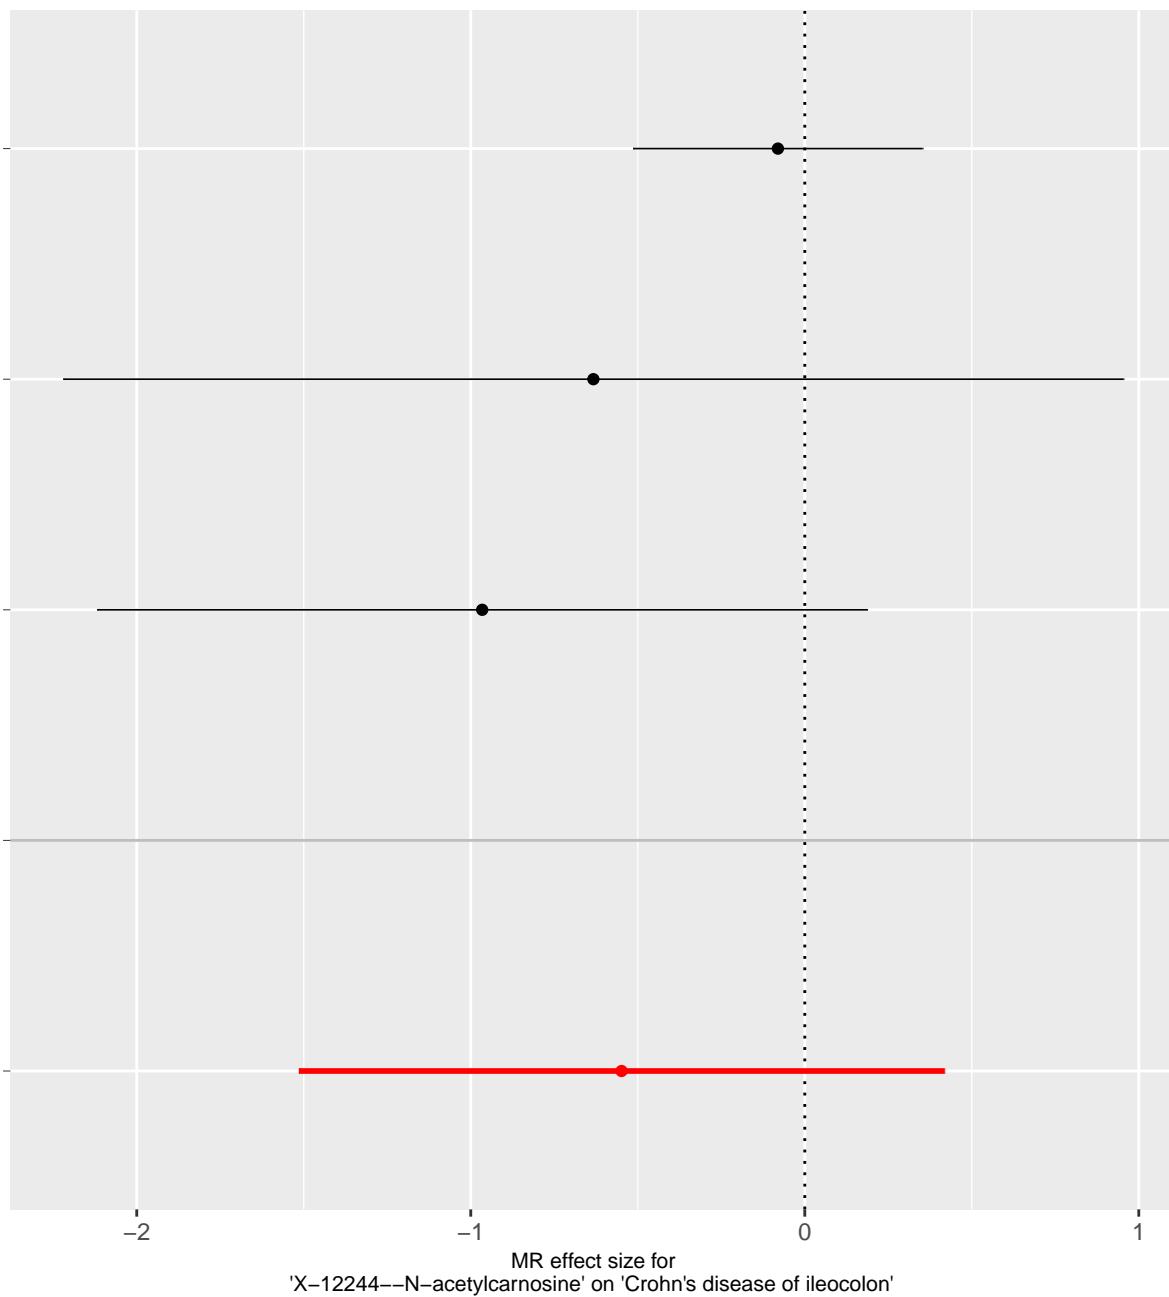

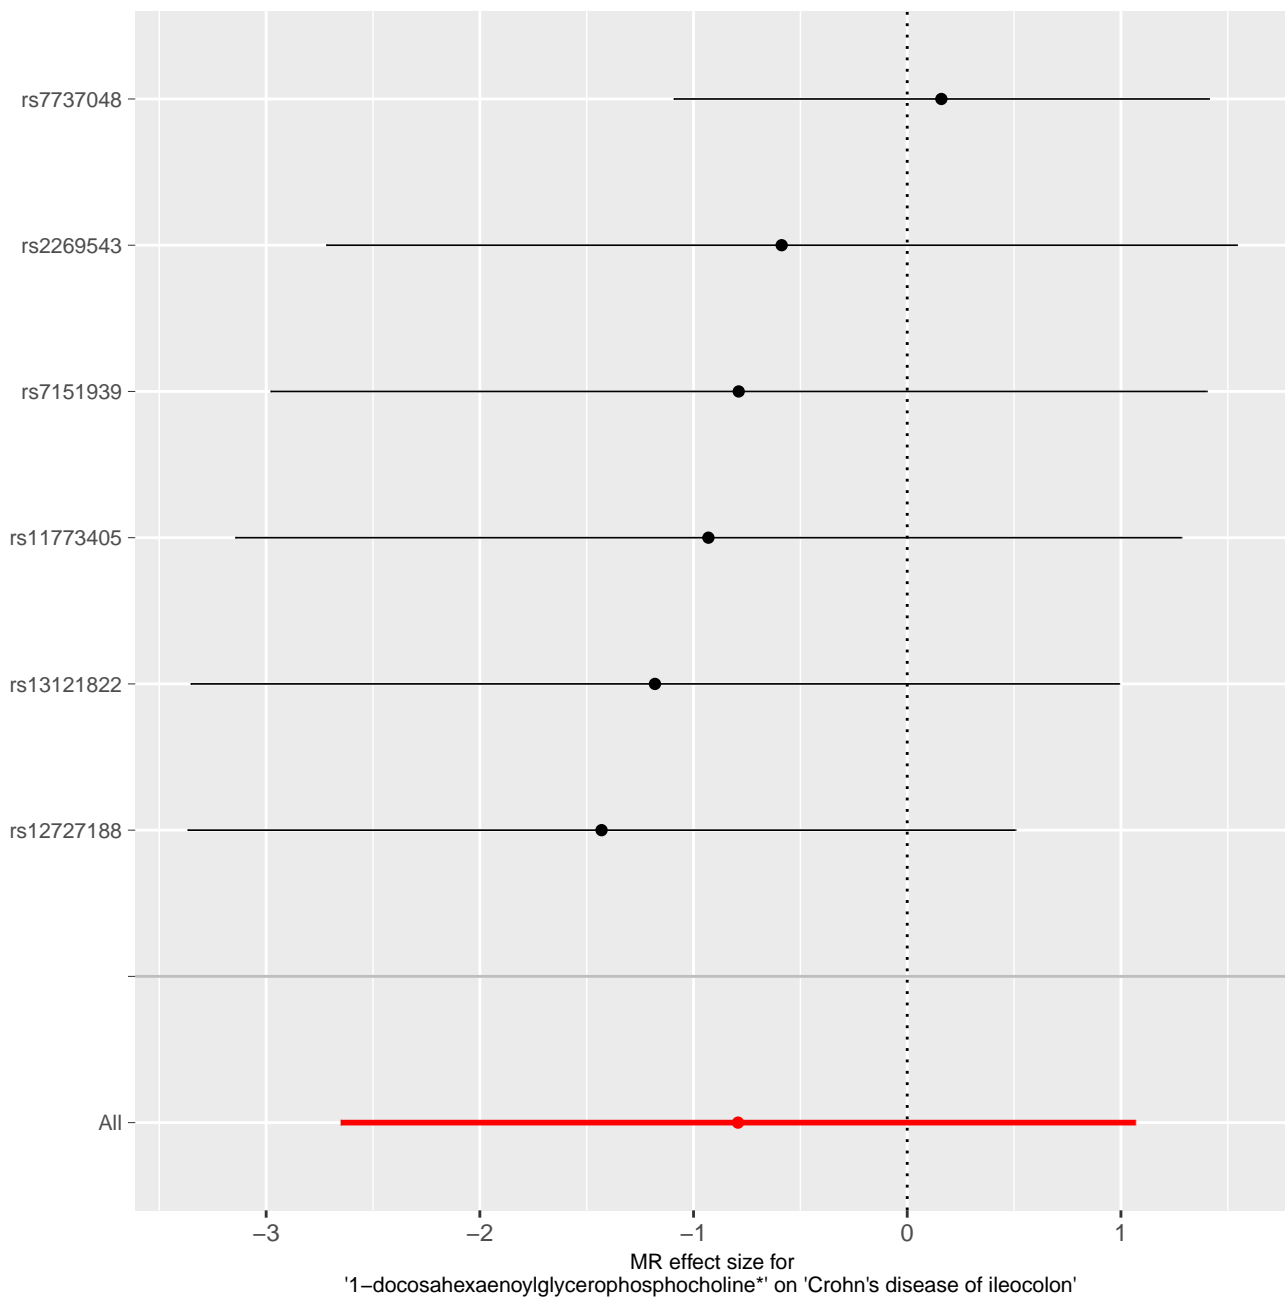

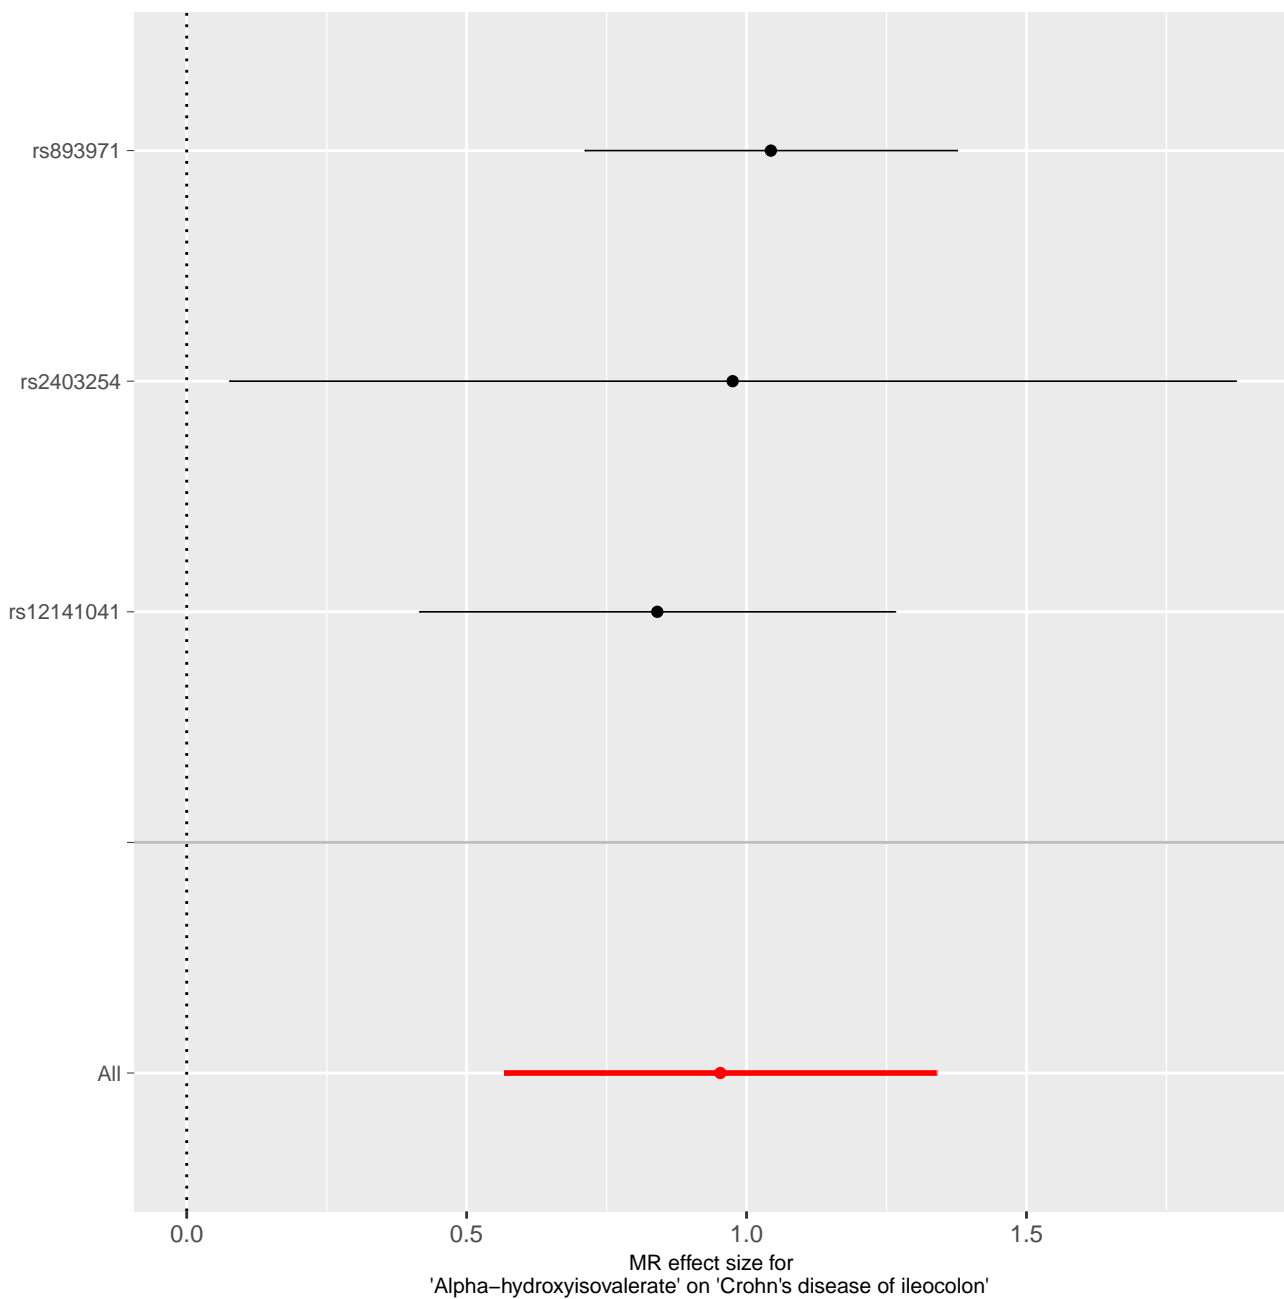

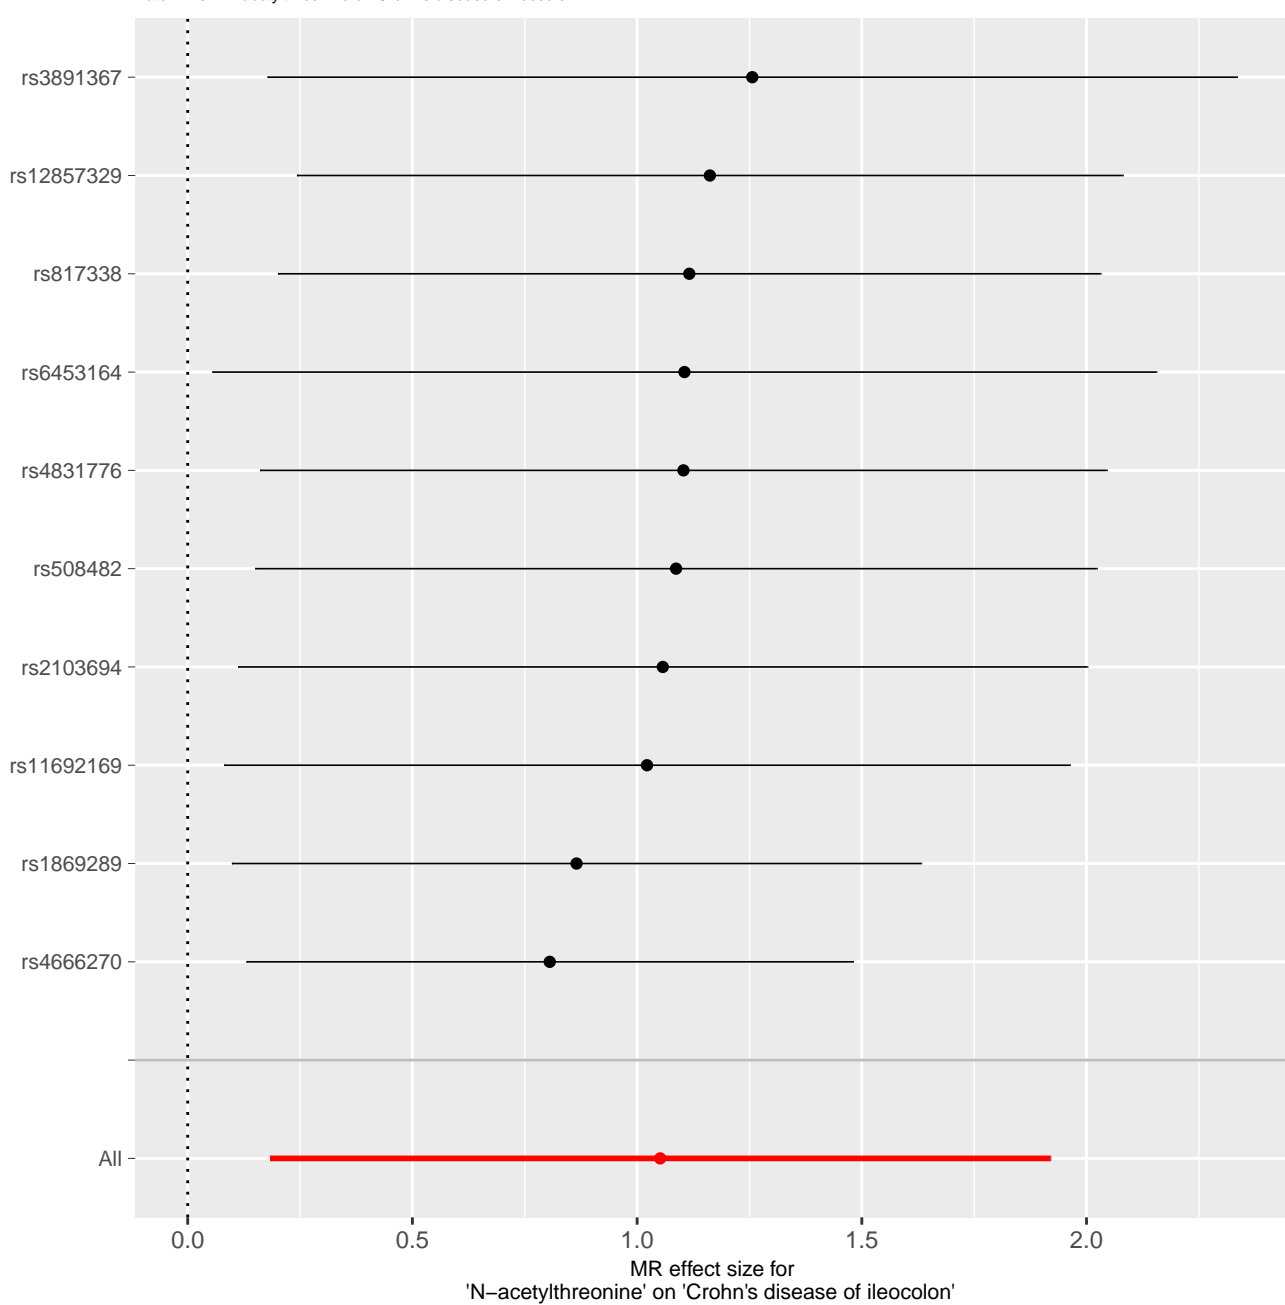

rs7552404

rs2062541

rs8396

All

0.0

0.5

1.0

MR effect size for

'Decanoylcarnitine' on 'Crohn's disease of ileocolon'

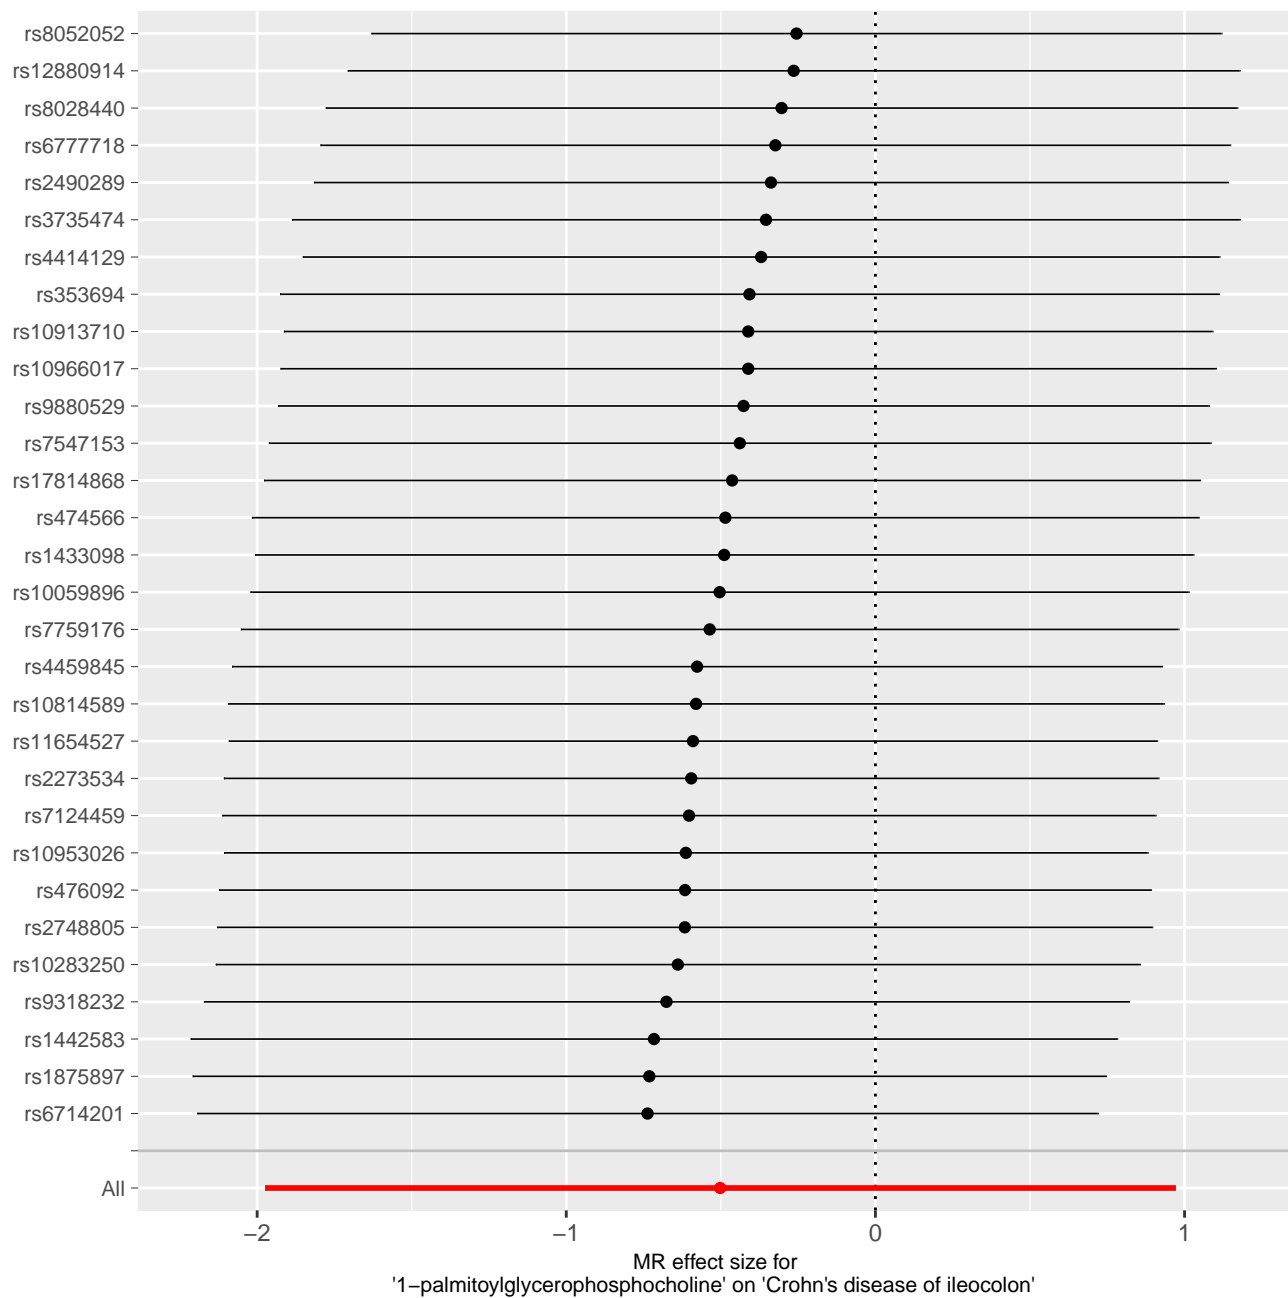

MR effect size for  
'1-palmitoylglycerophosphocholine' on 'Crohn's disease of ileocolon'



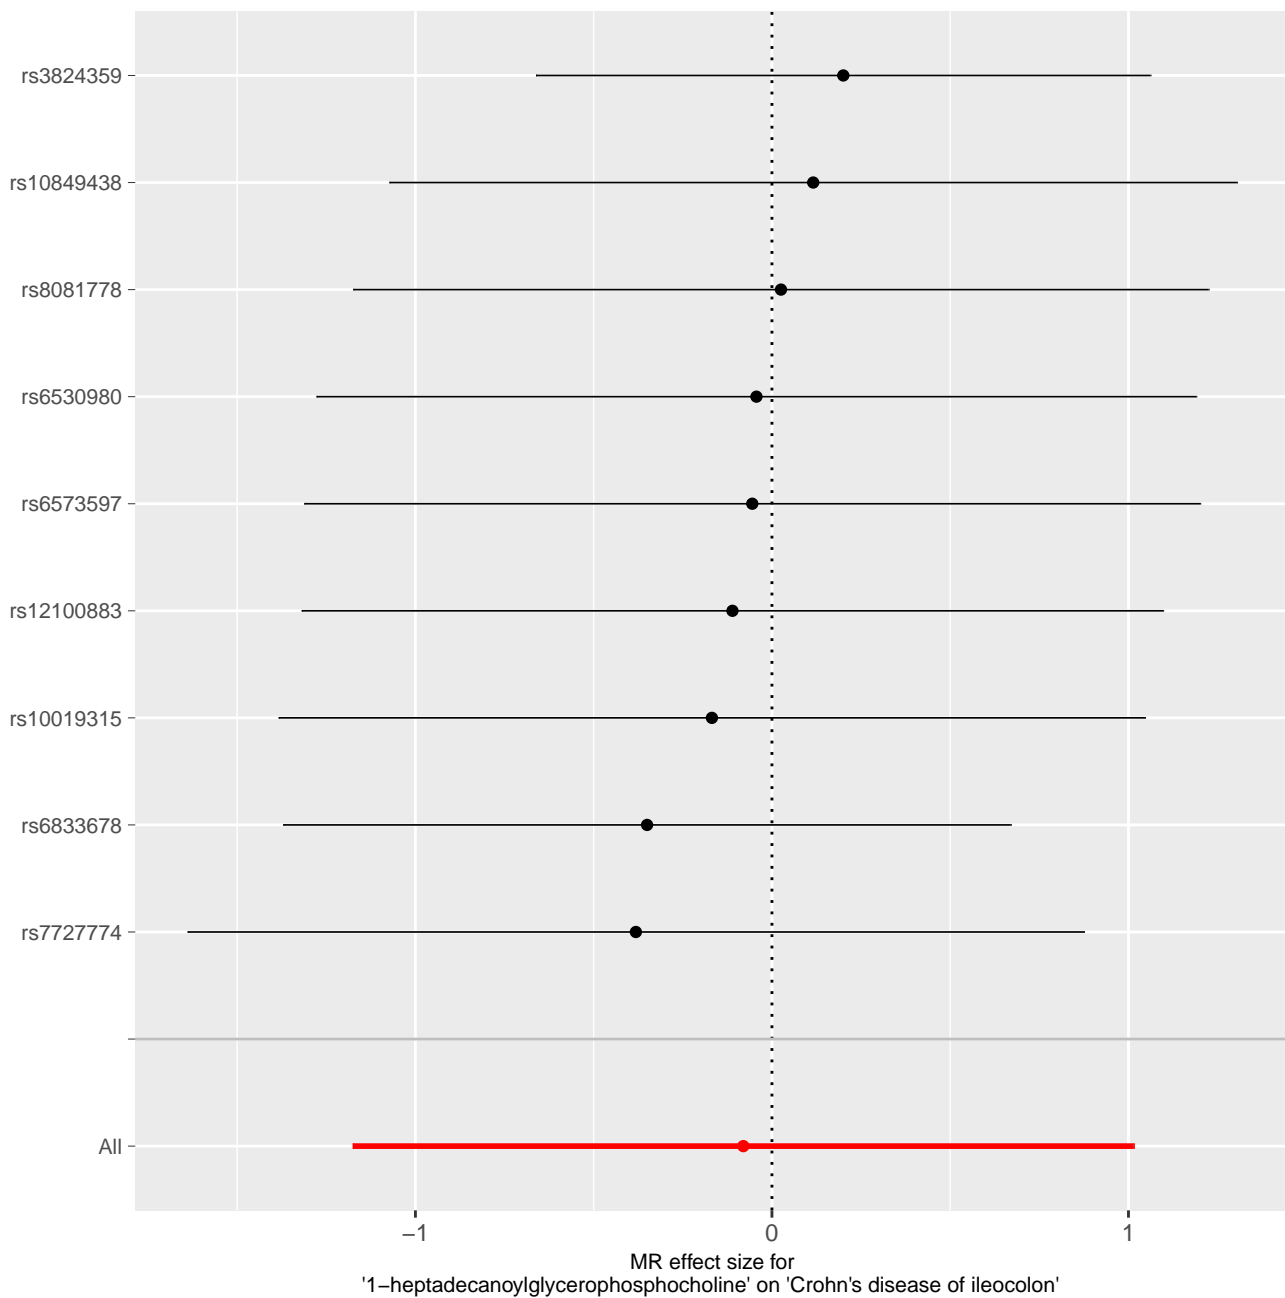

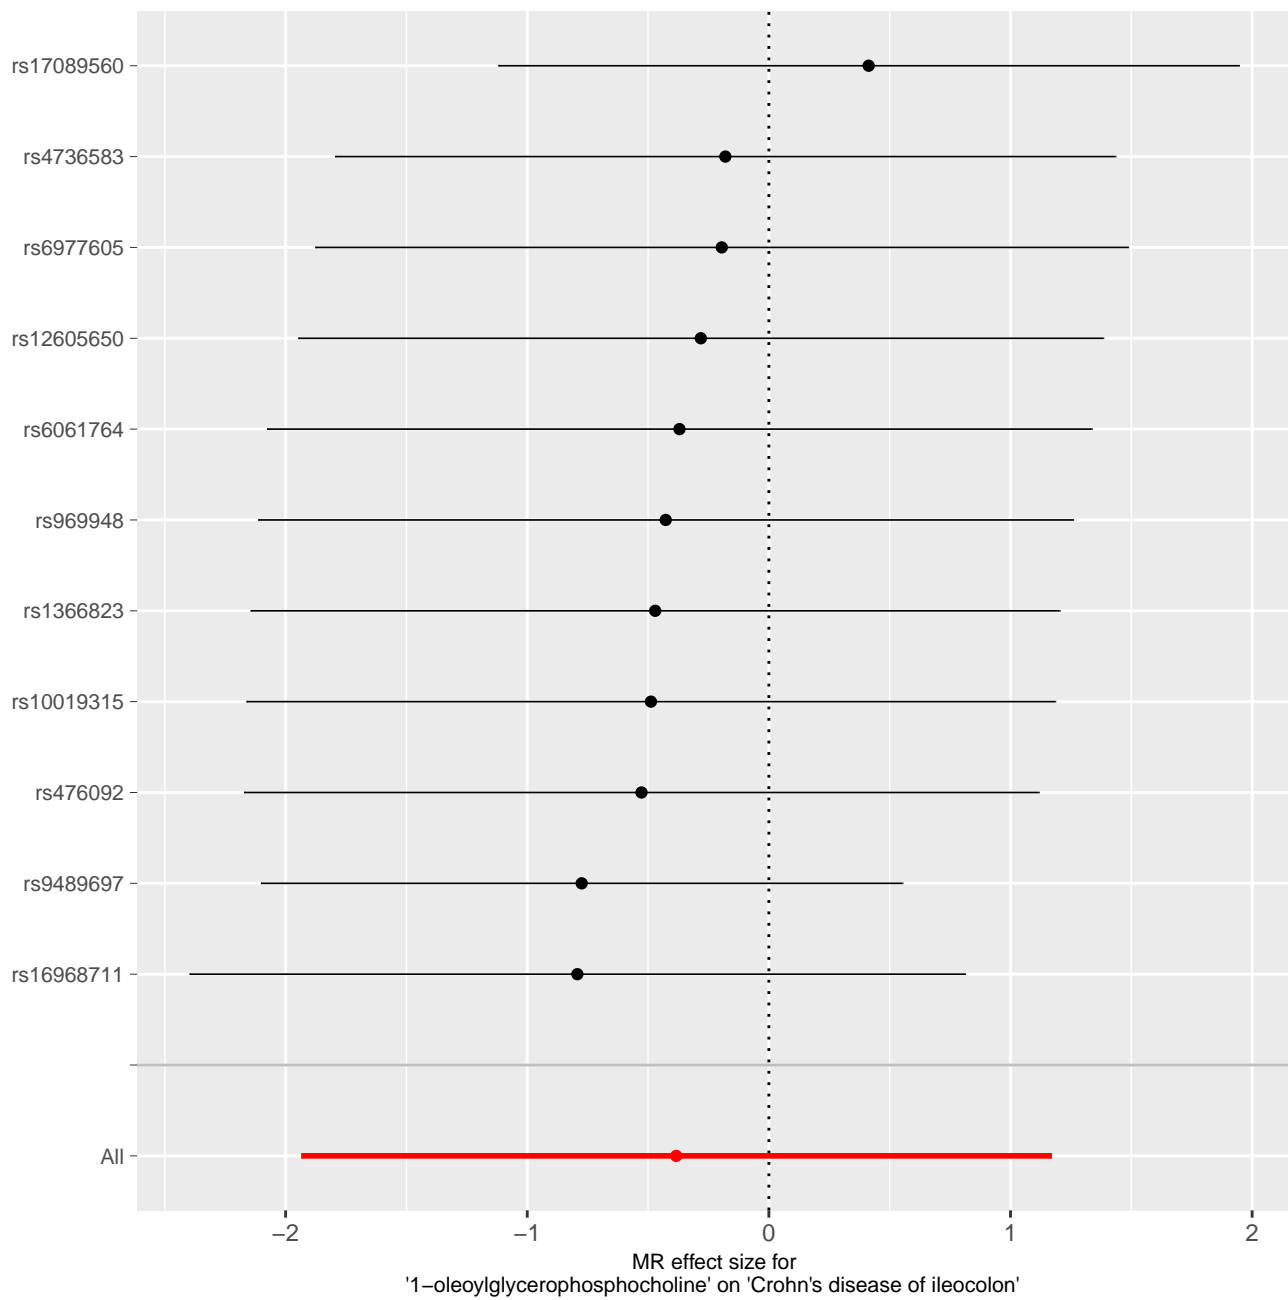

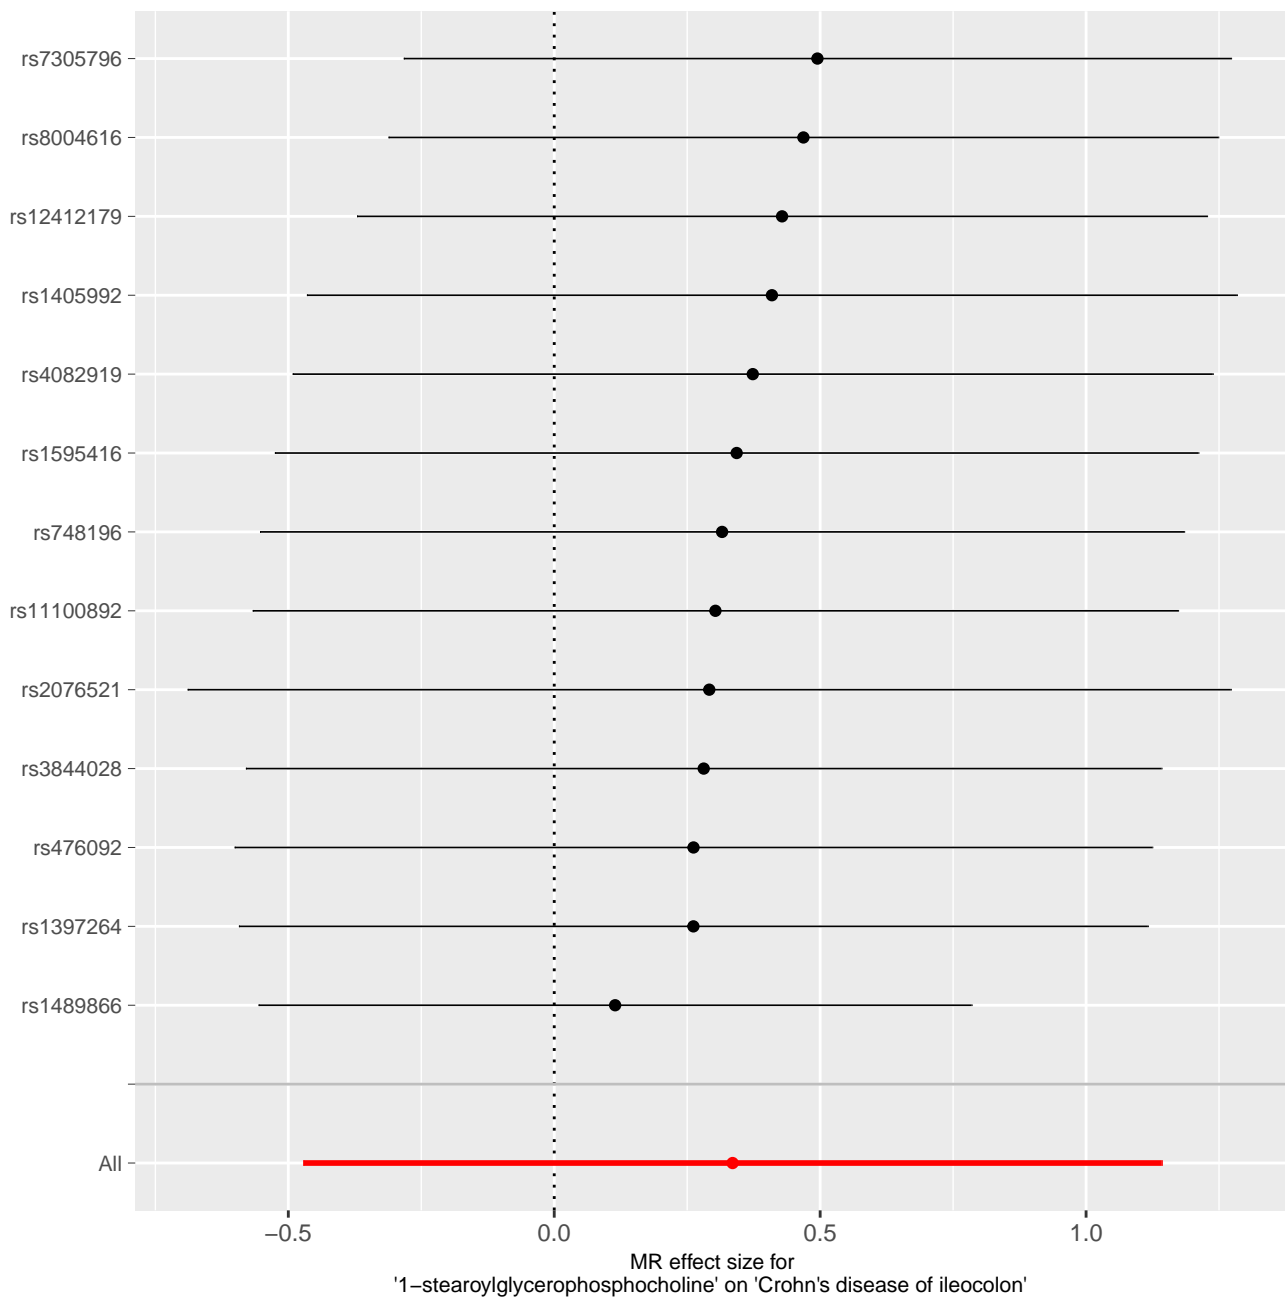

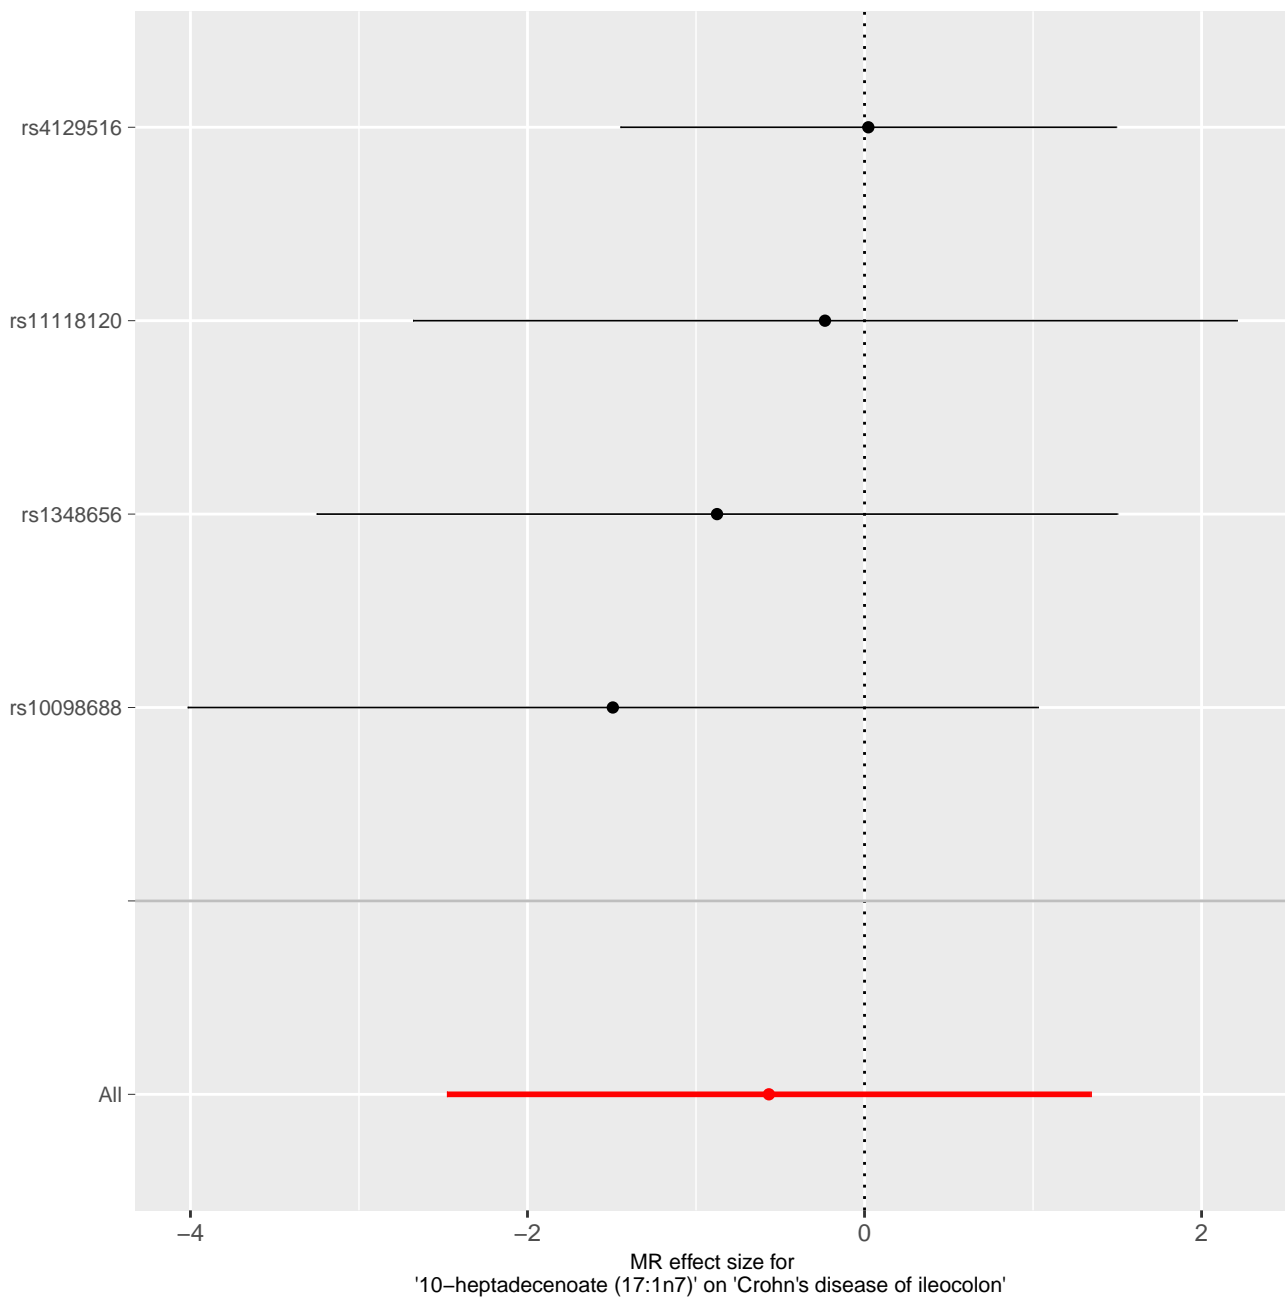

rs2242415

rs1348656

rs1034879

All

-1

0

1

MR effect size for

'Linolenate [alpha or gamma; (18:3n3 or 6)]' on 'Crohn's disease of ileocolon'

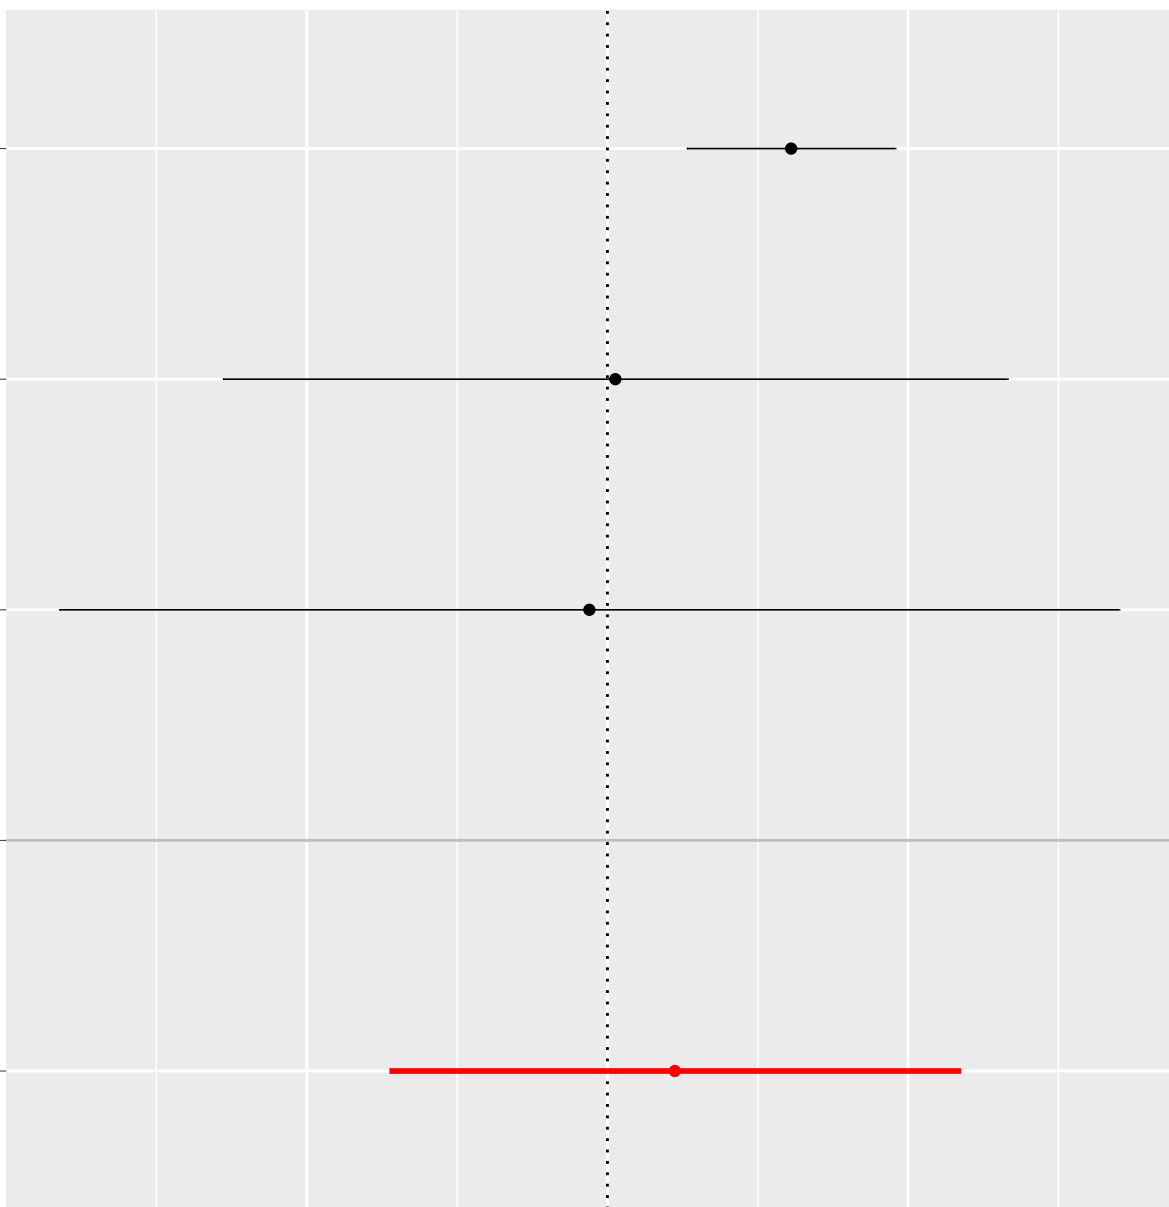

rs1165209

rs1466245

rs13538

All

MR effect size for

'X-12510--2-aminooctanoic acid' on 'Crohn's disease of ileocolon'

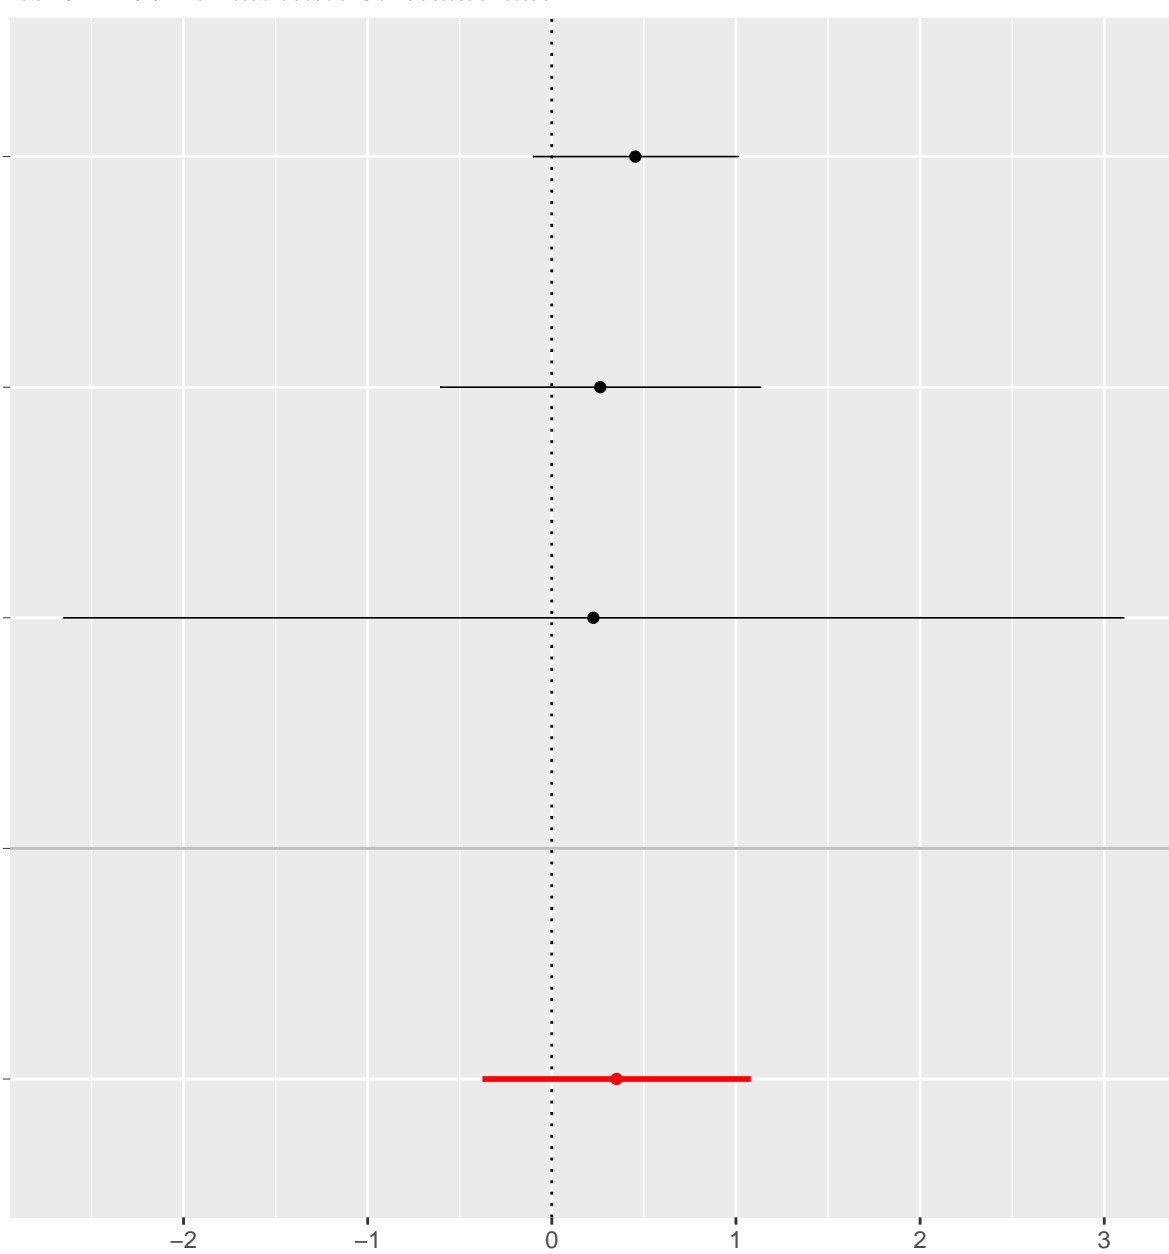

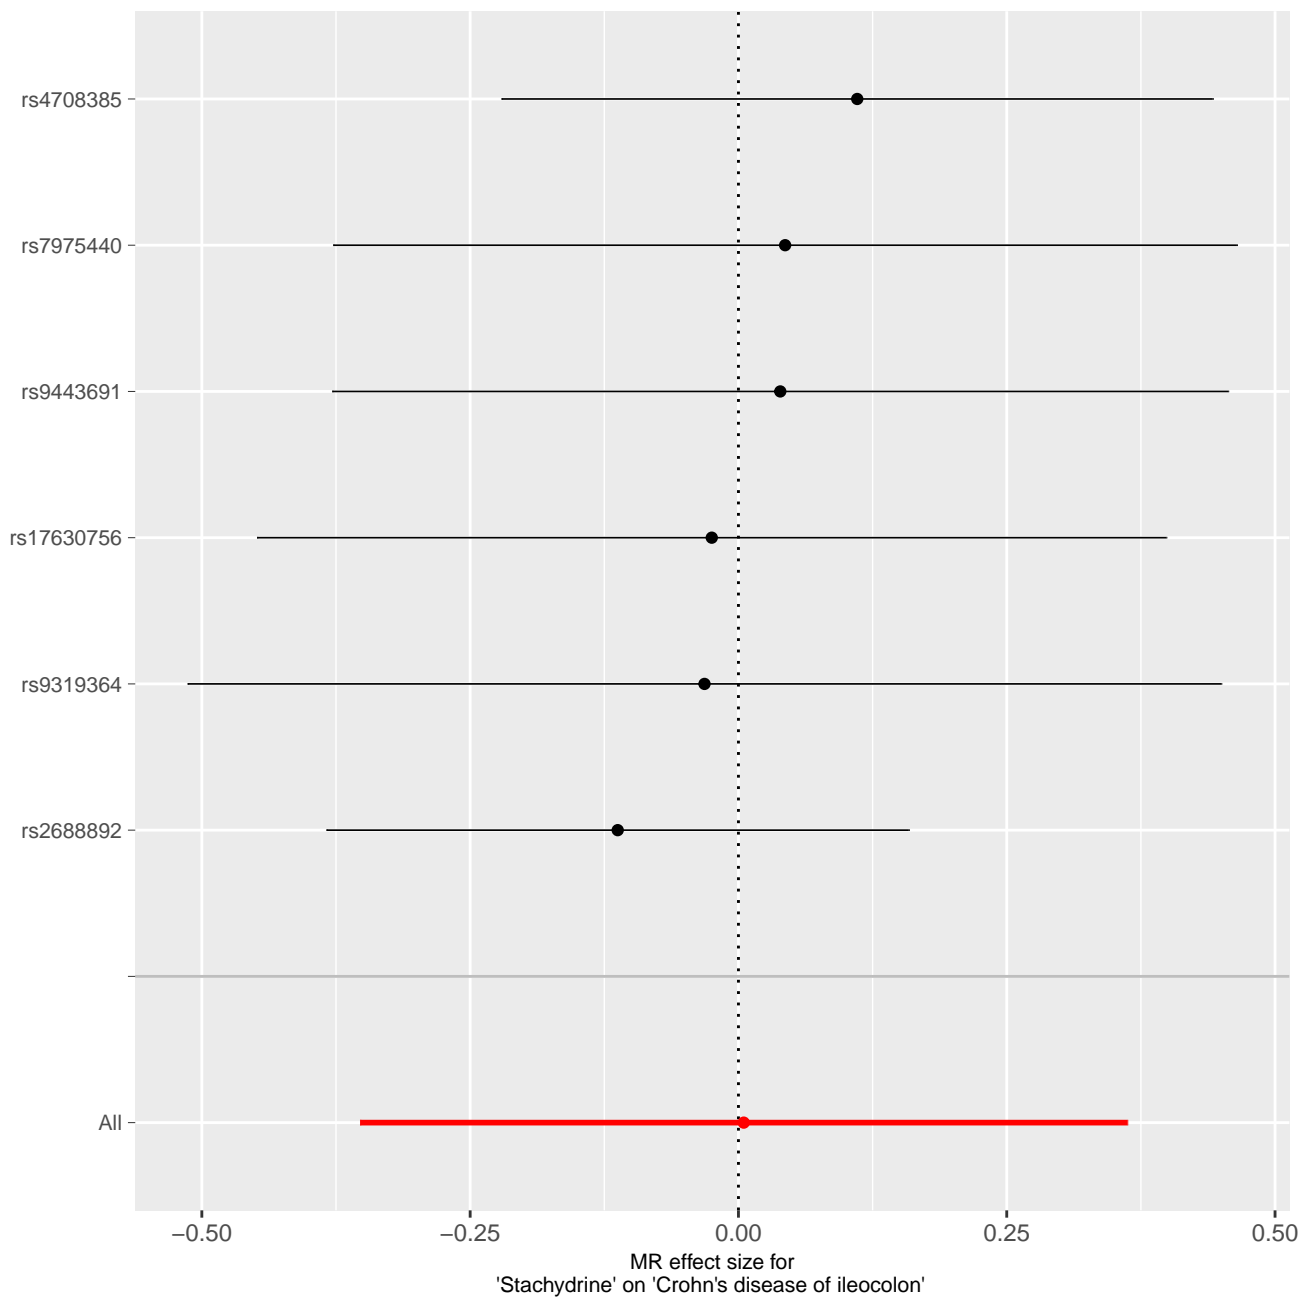

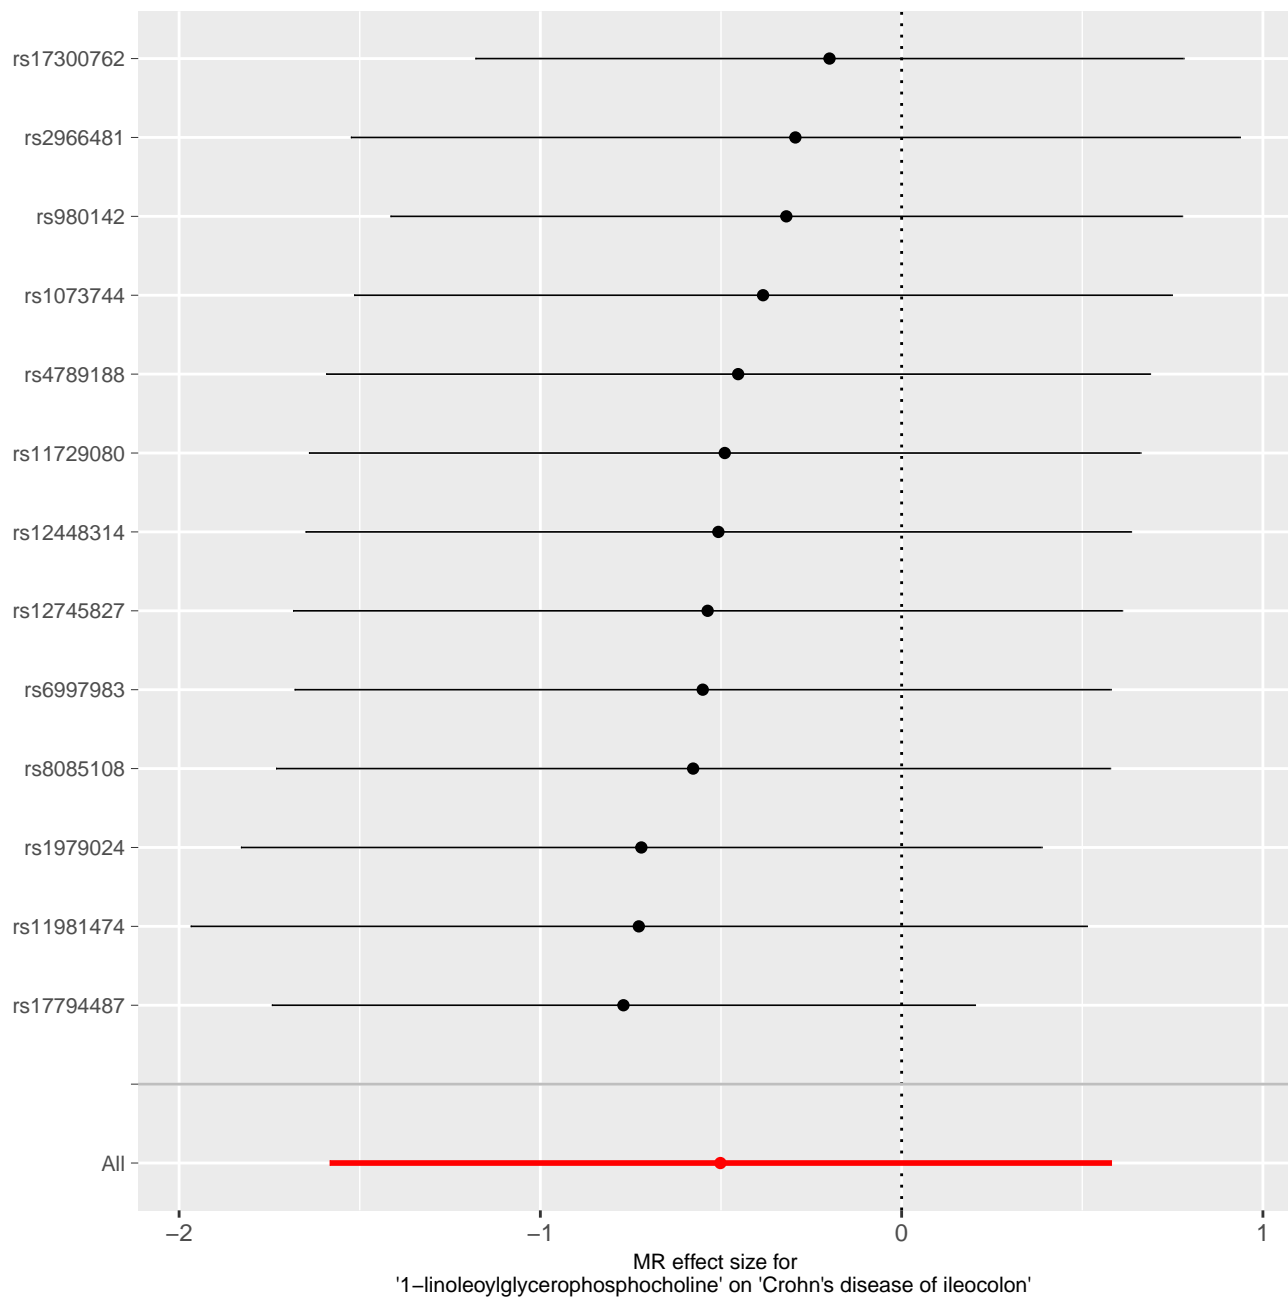



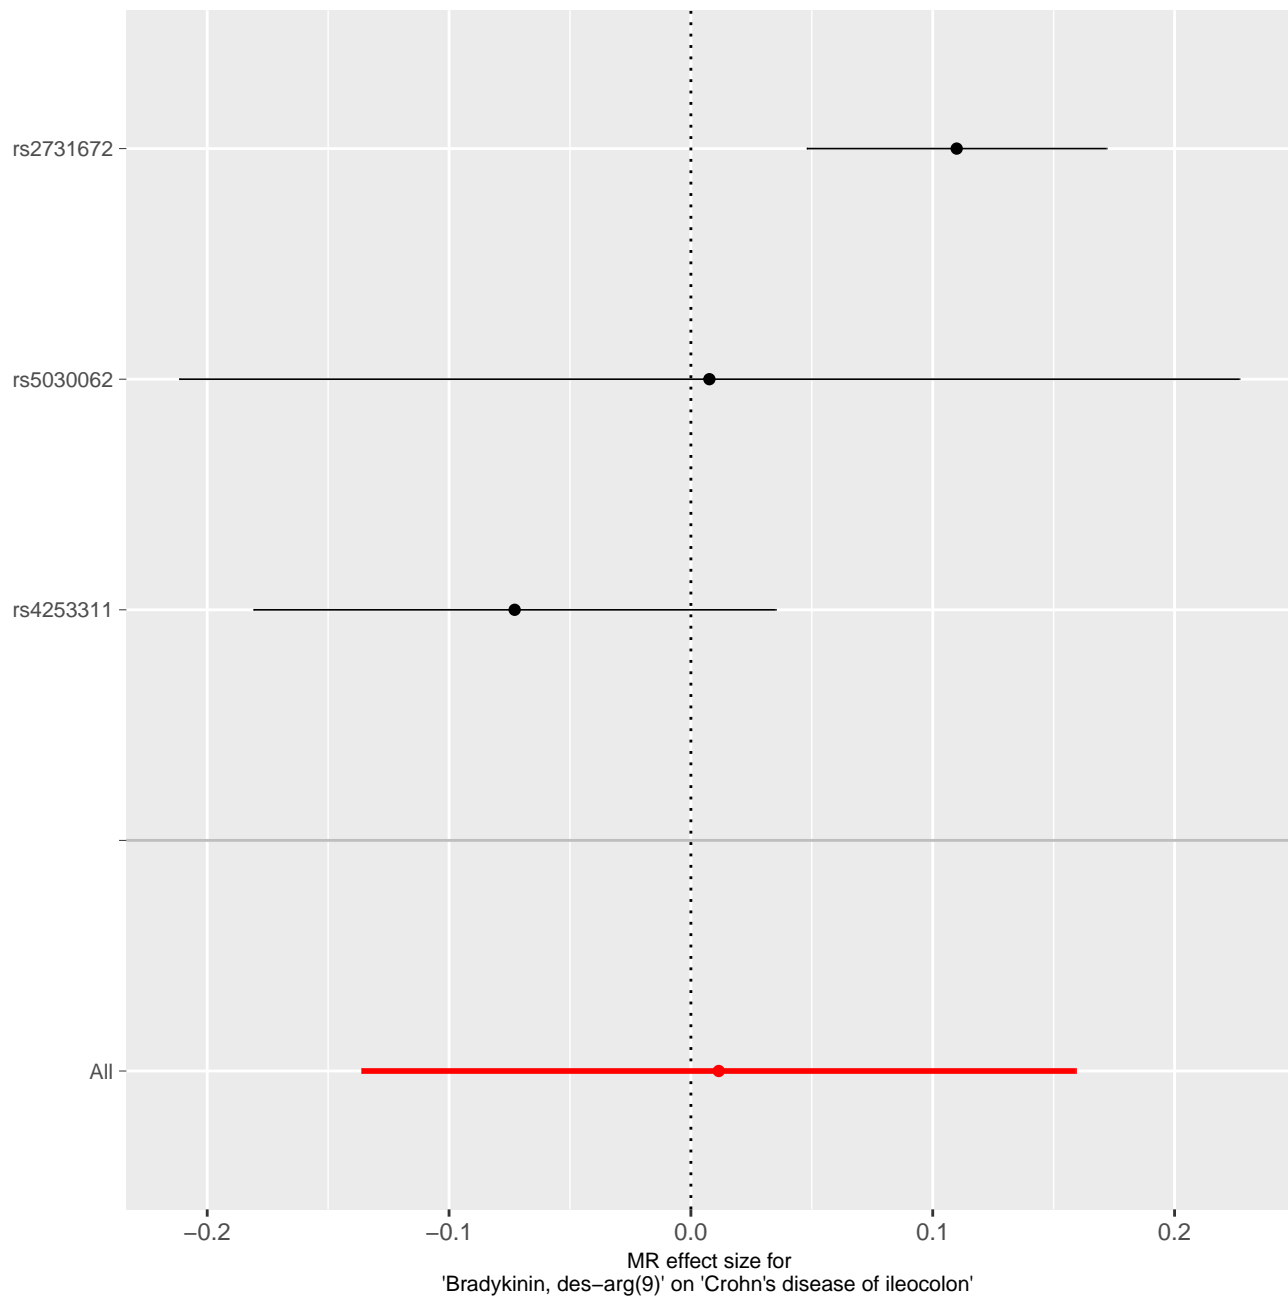

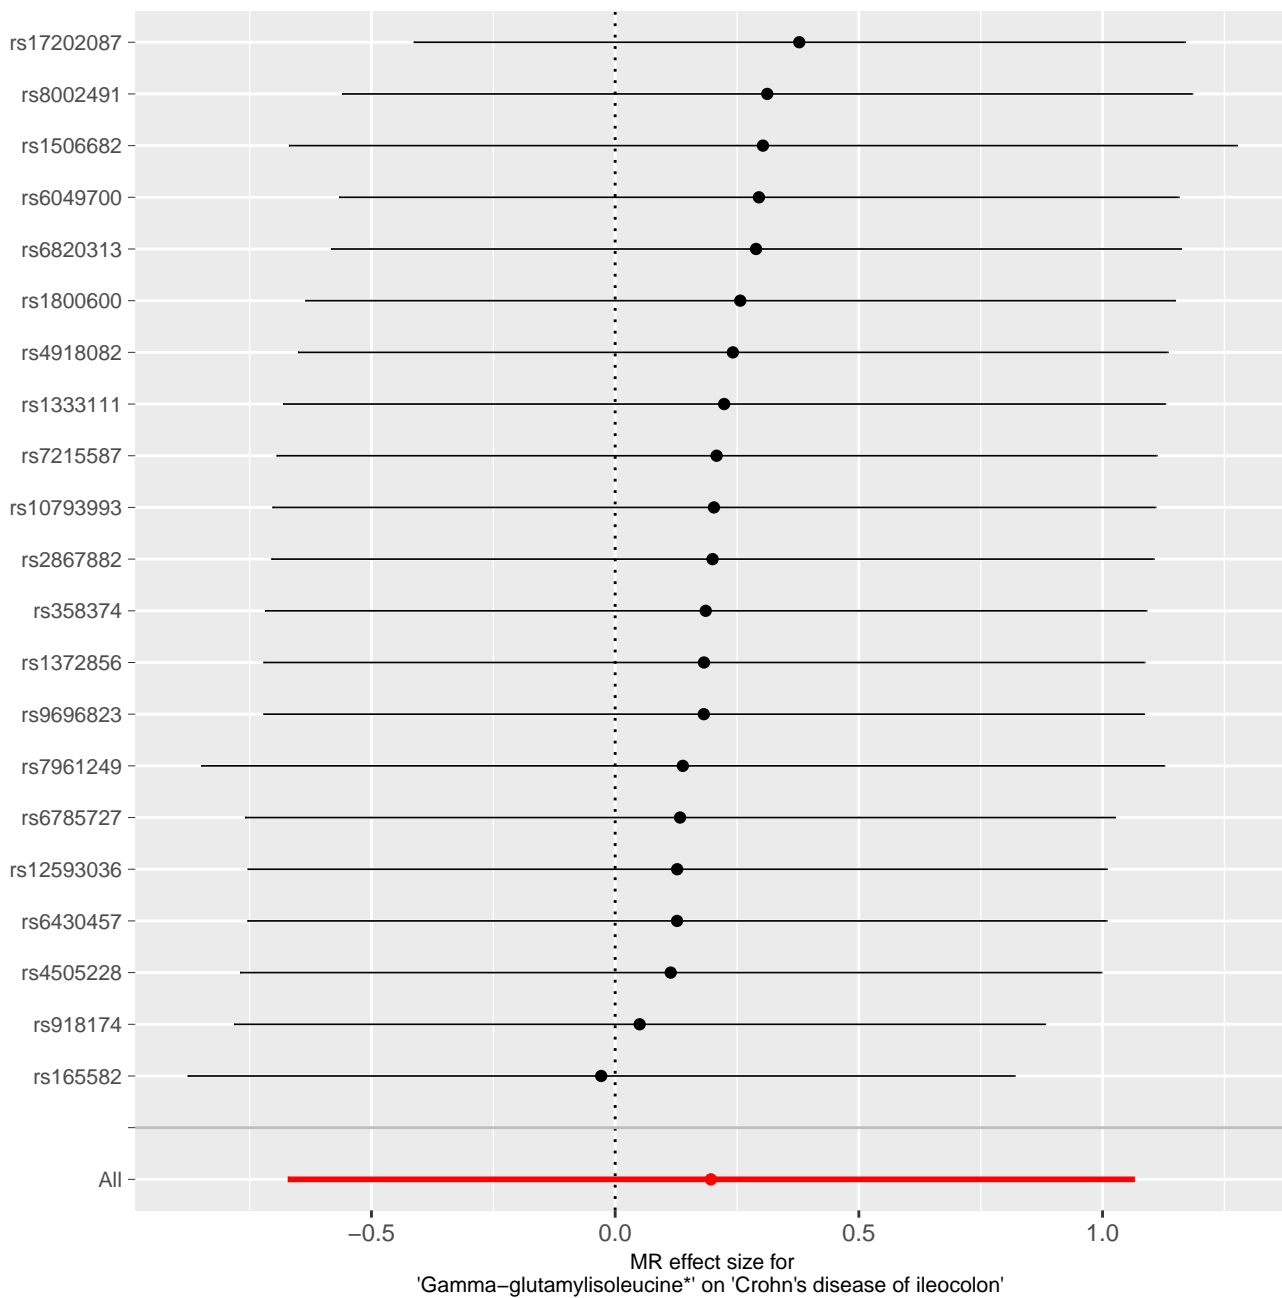

rs6907935

rs1456197

rs4861137

rs4680092

All

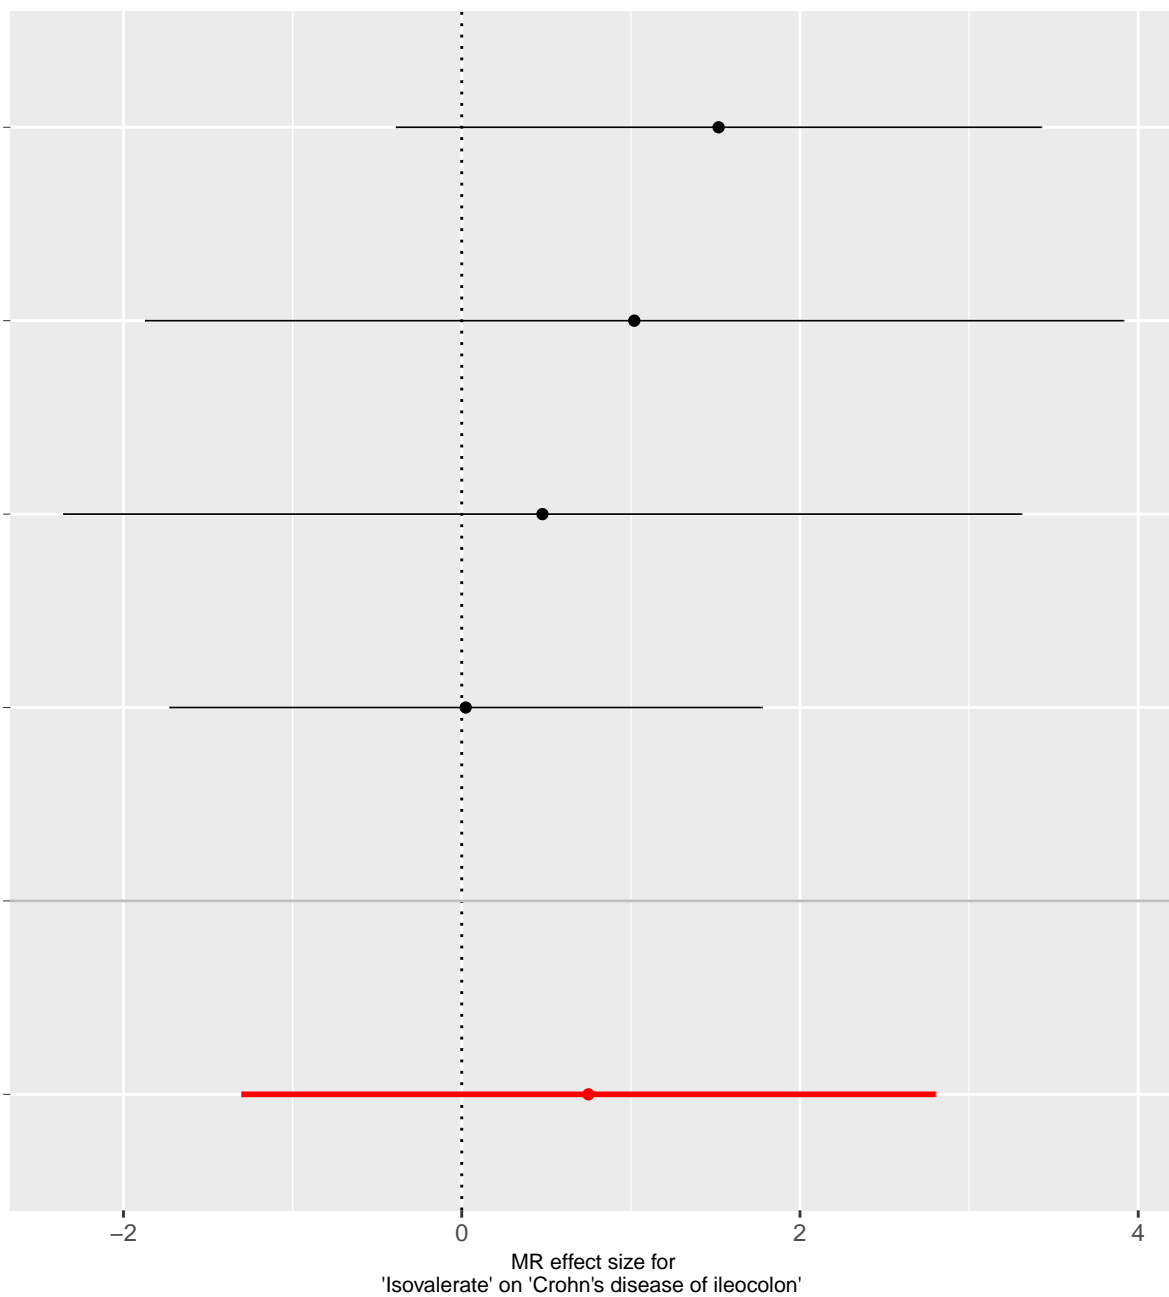

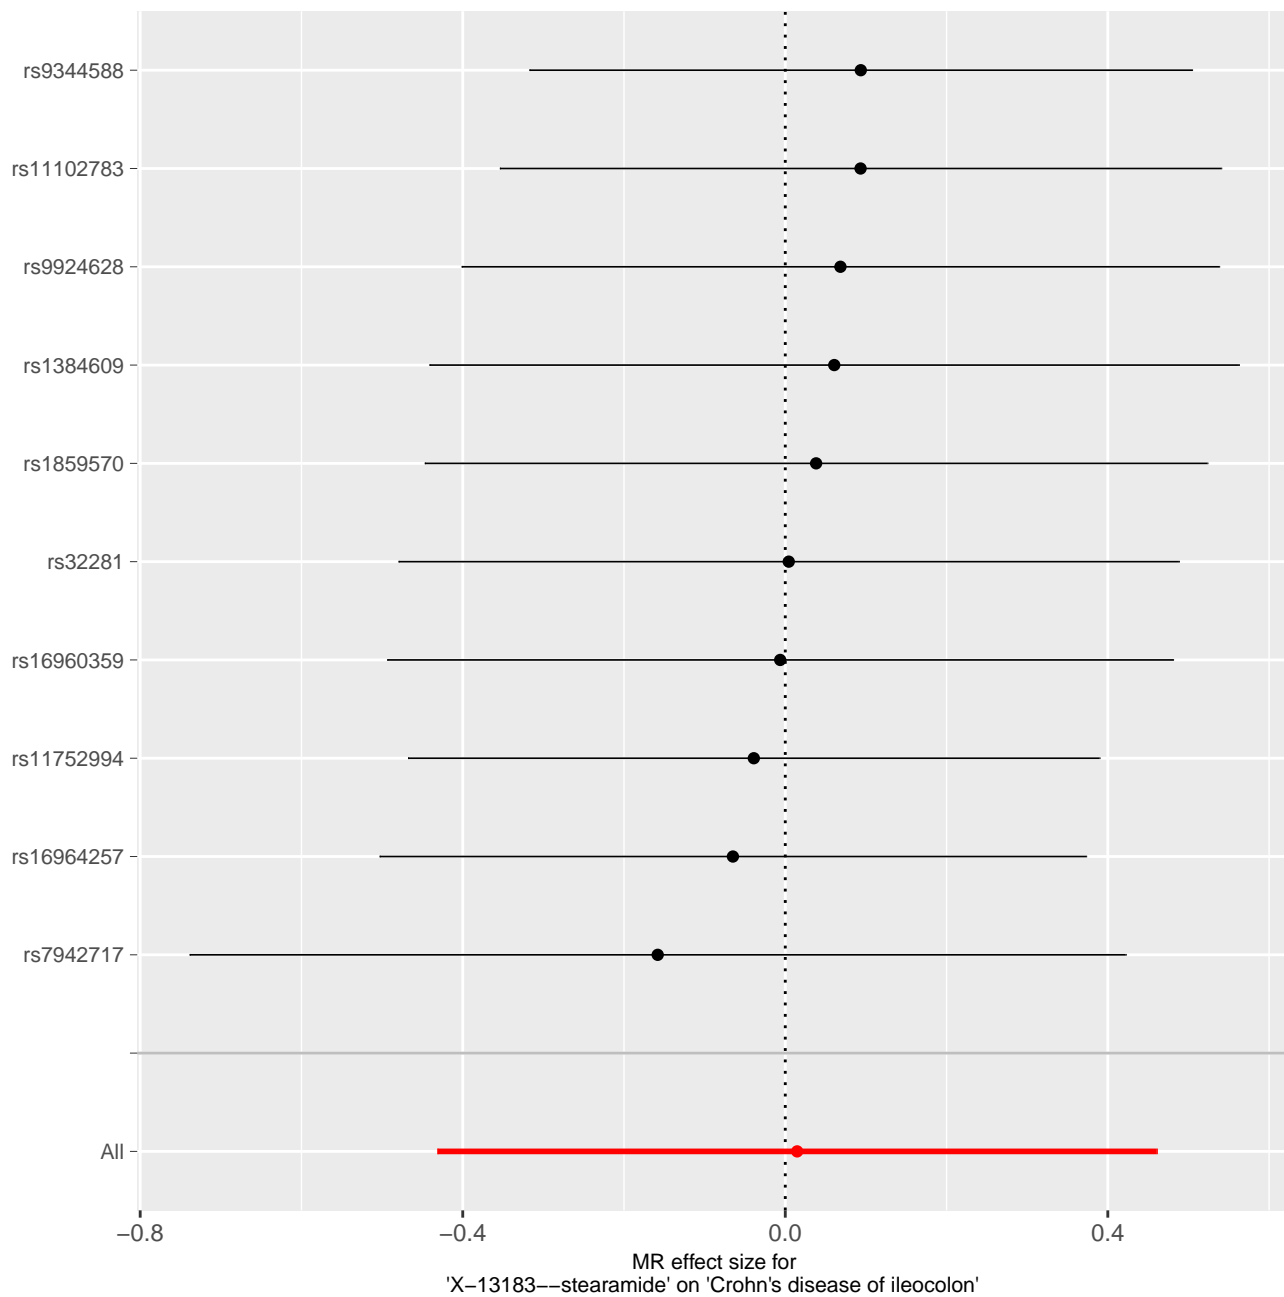

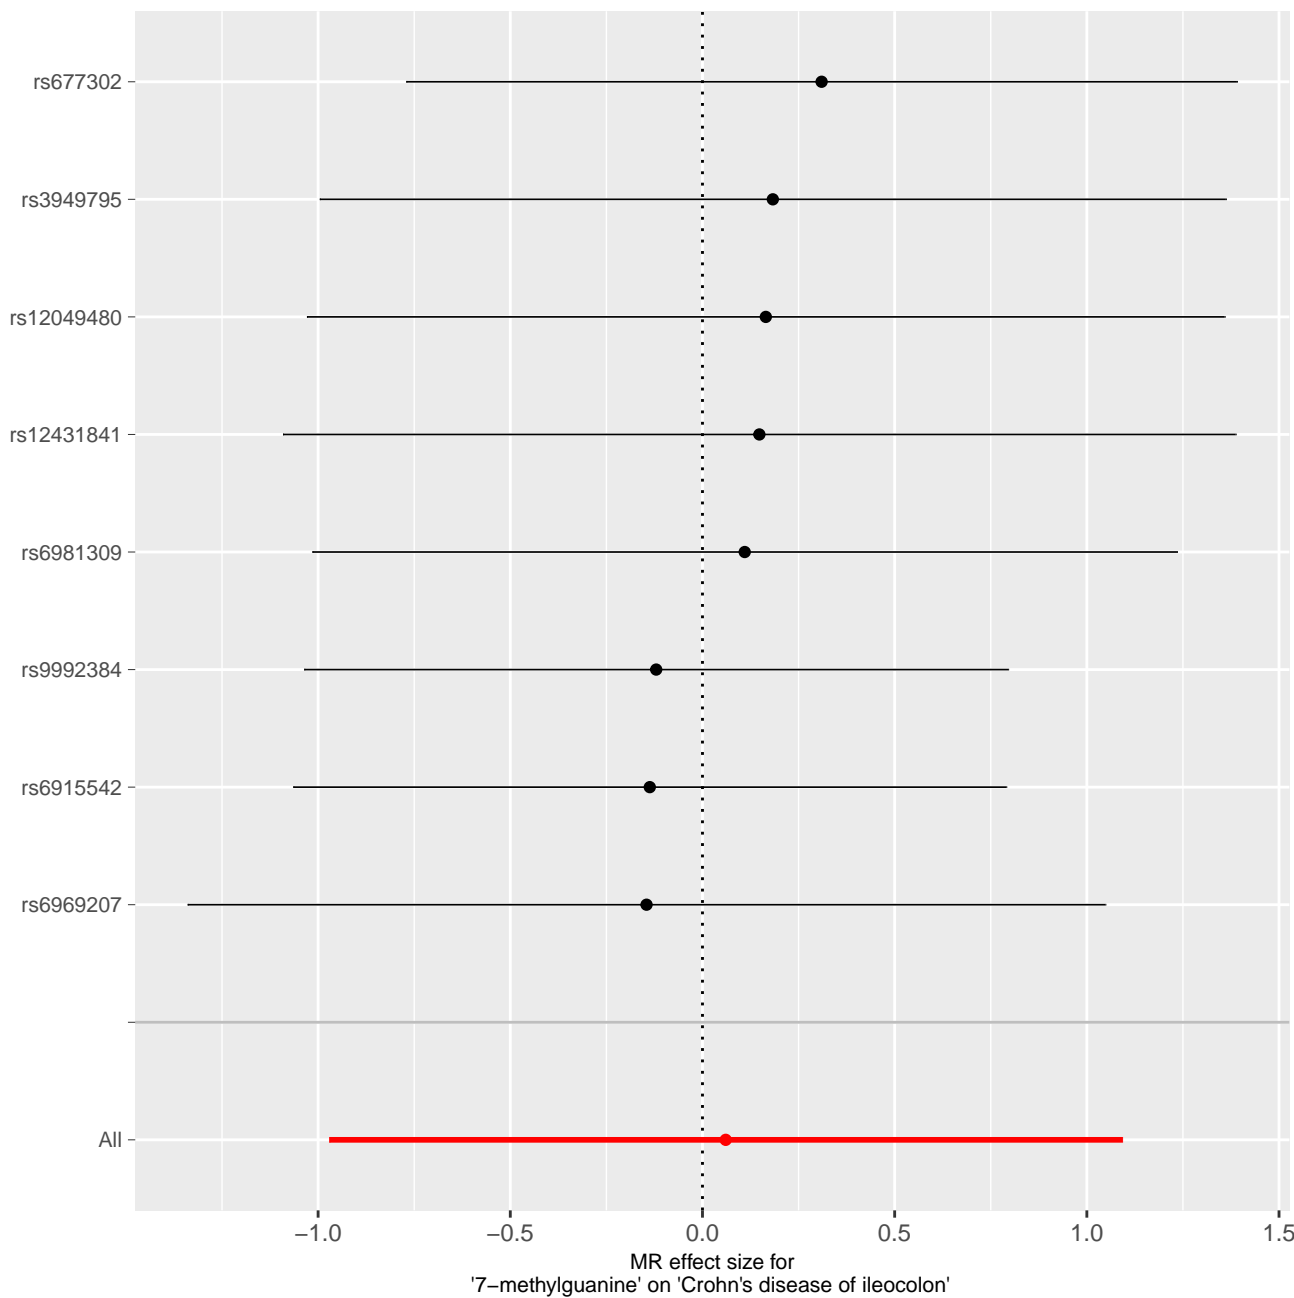

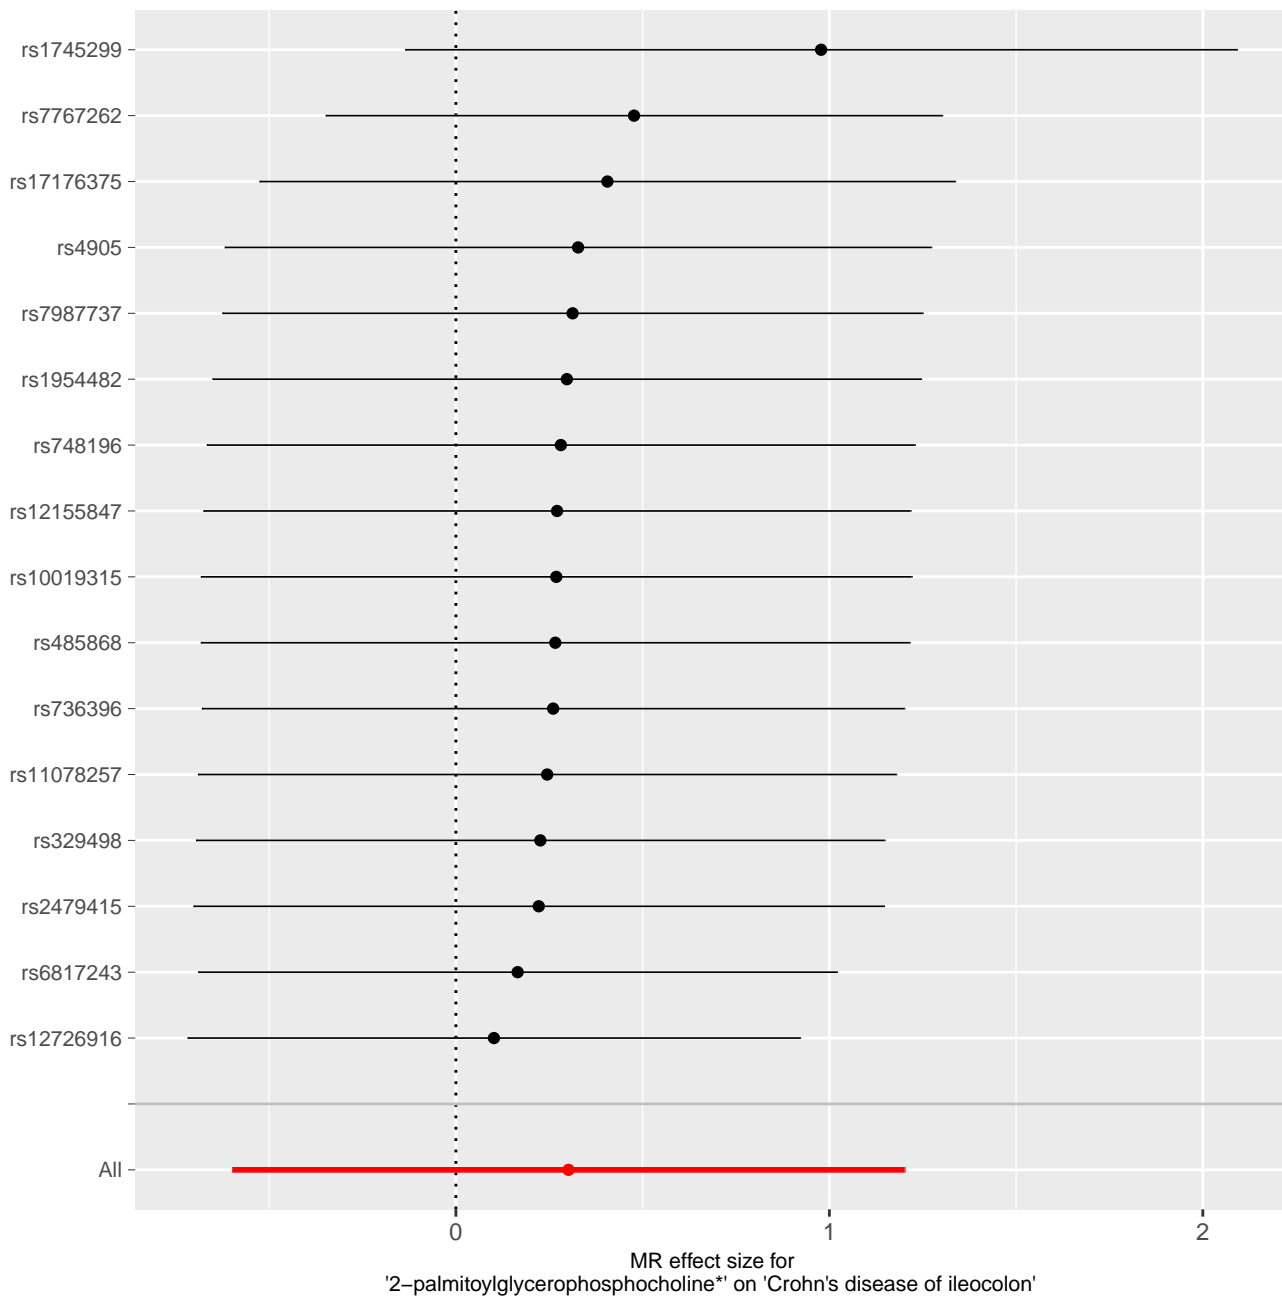

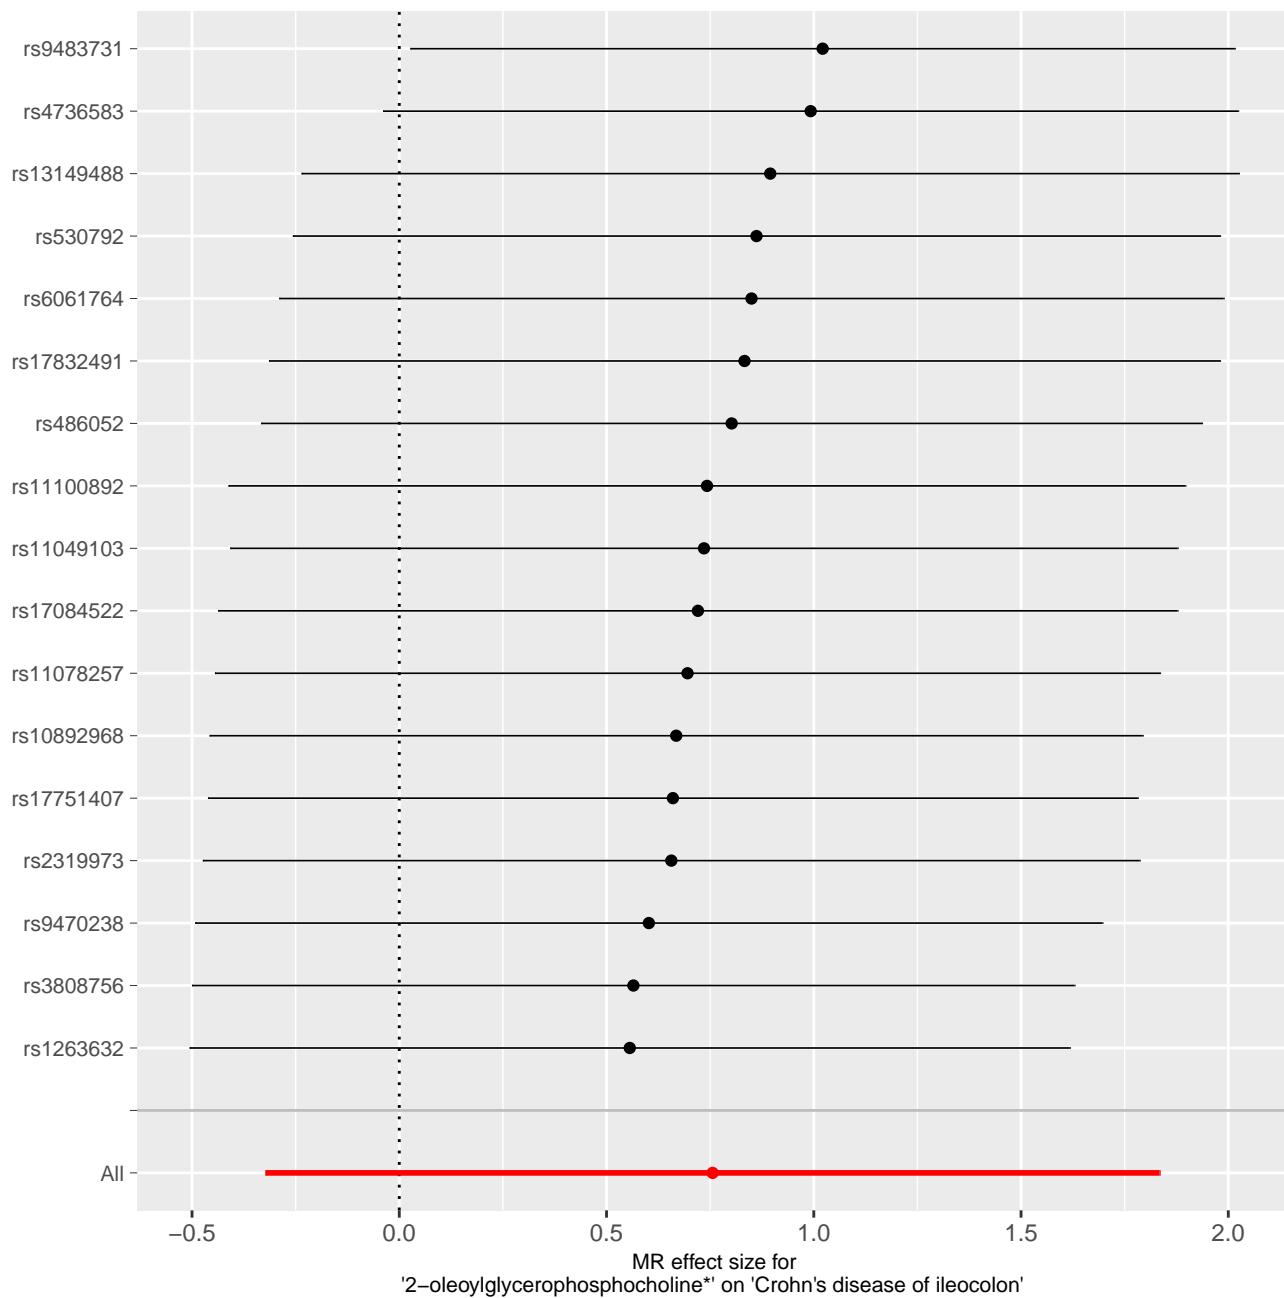

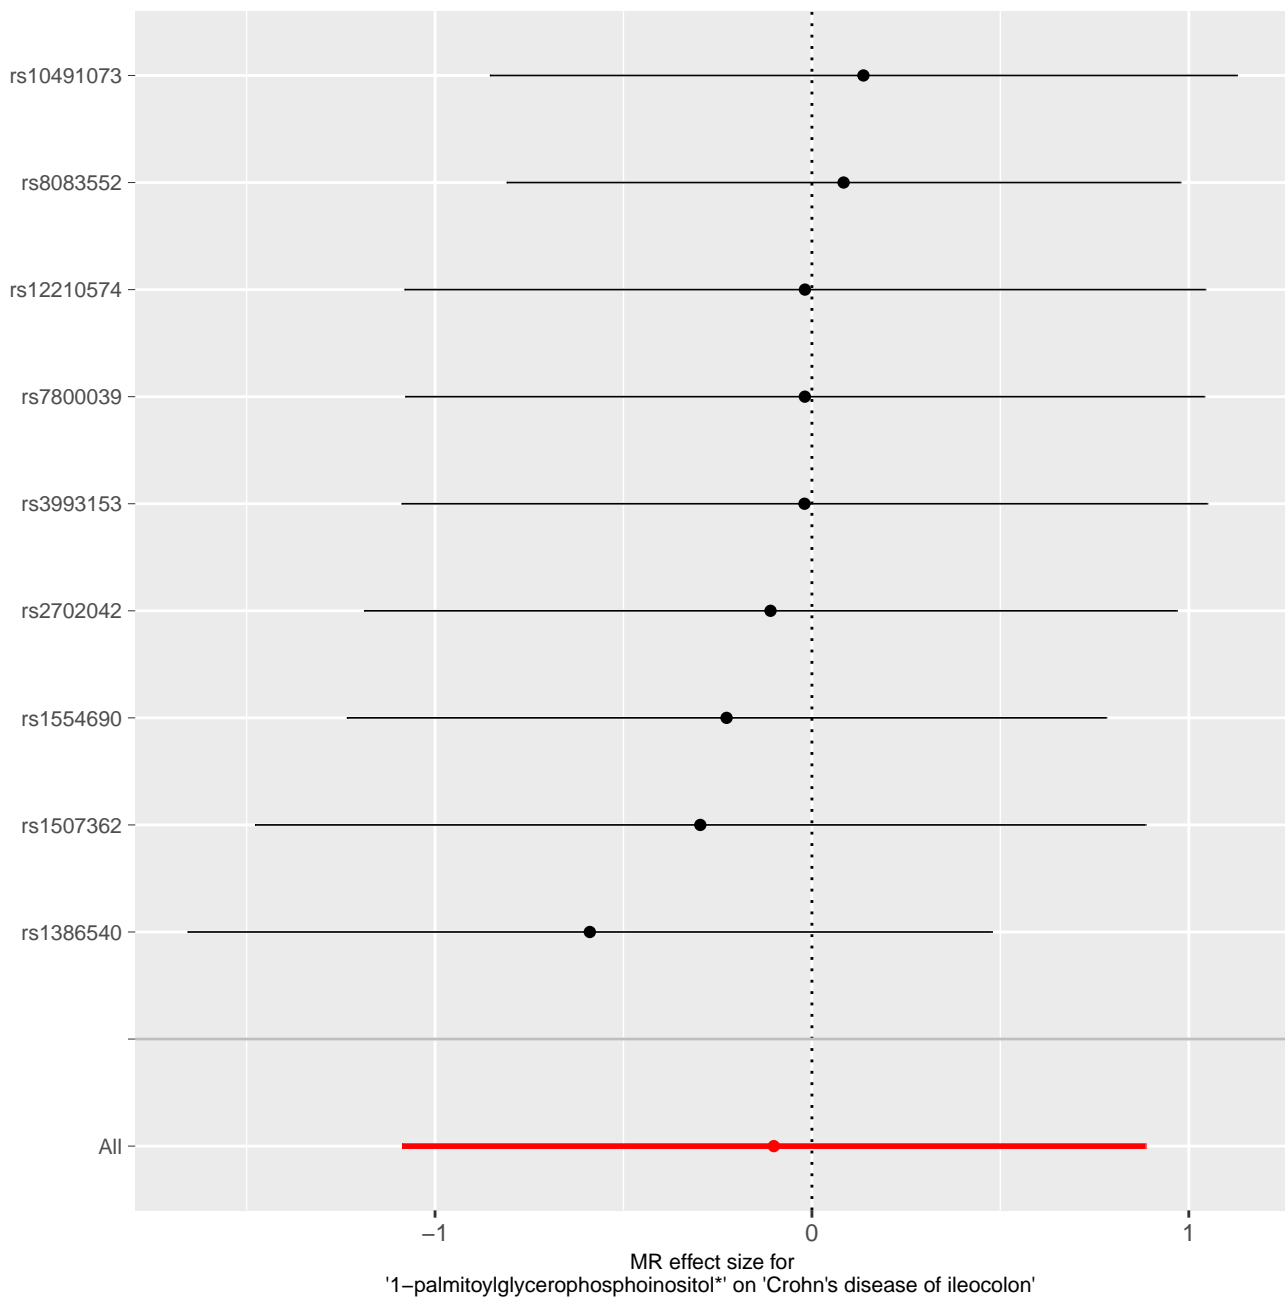



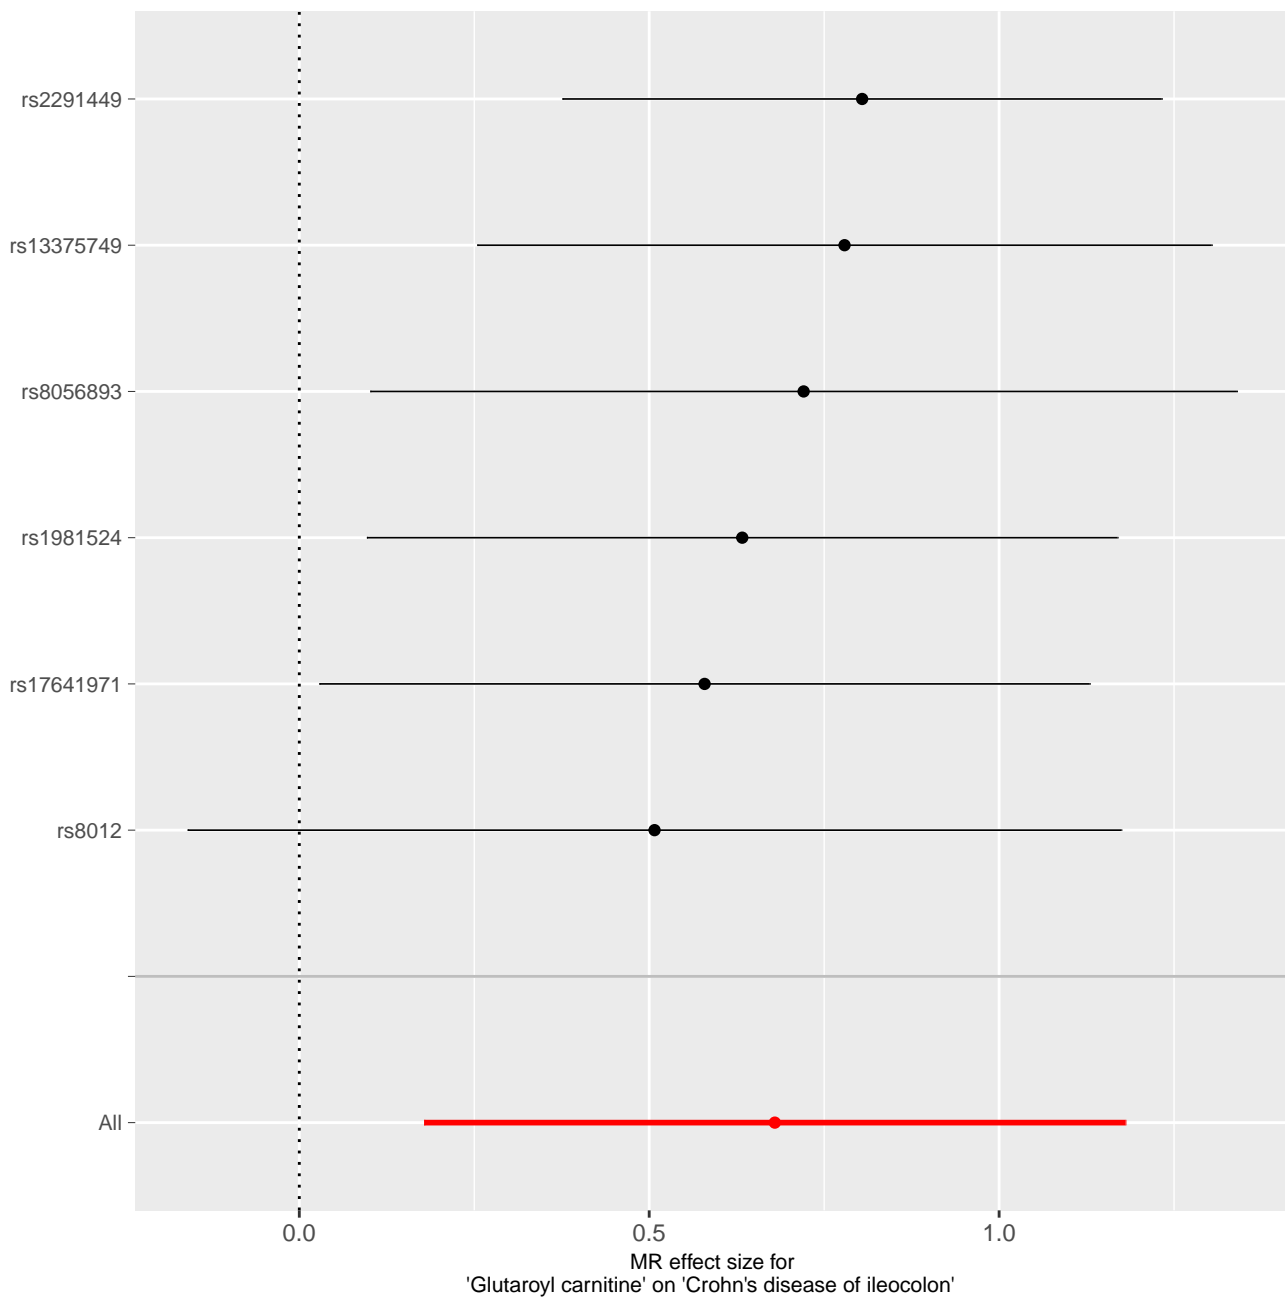

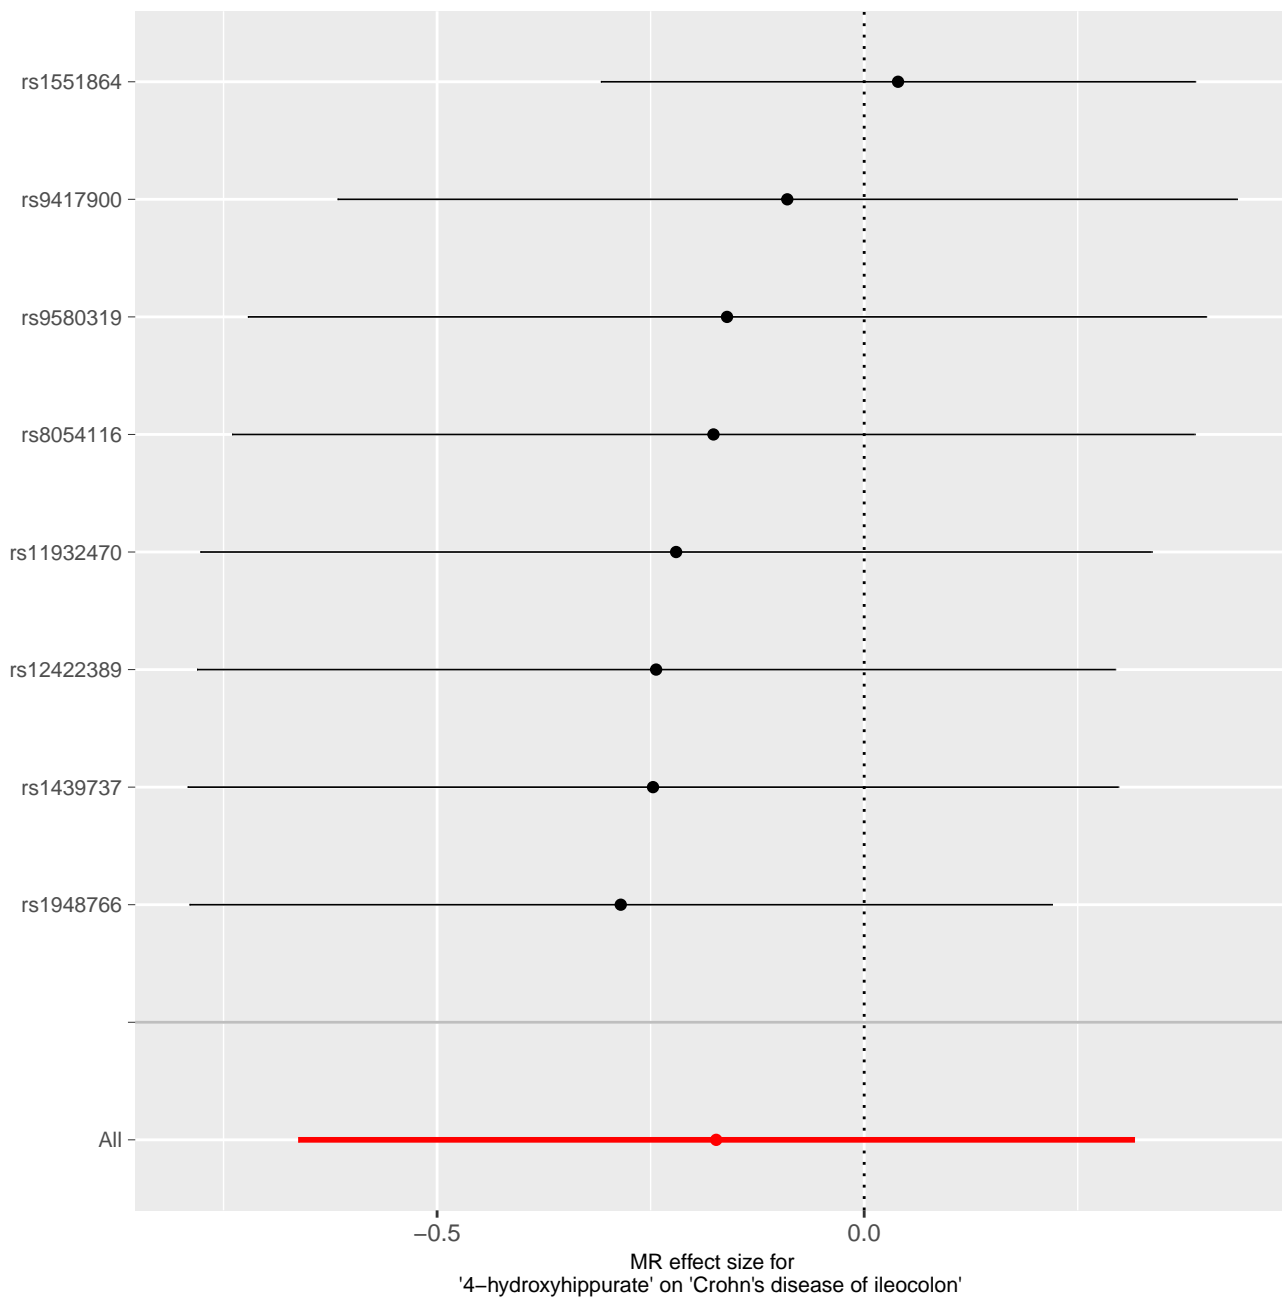

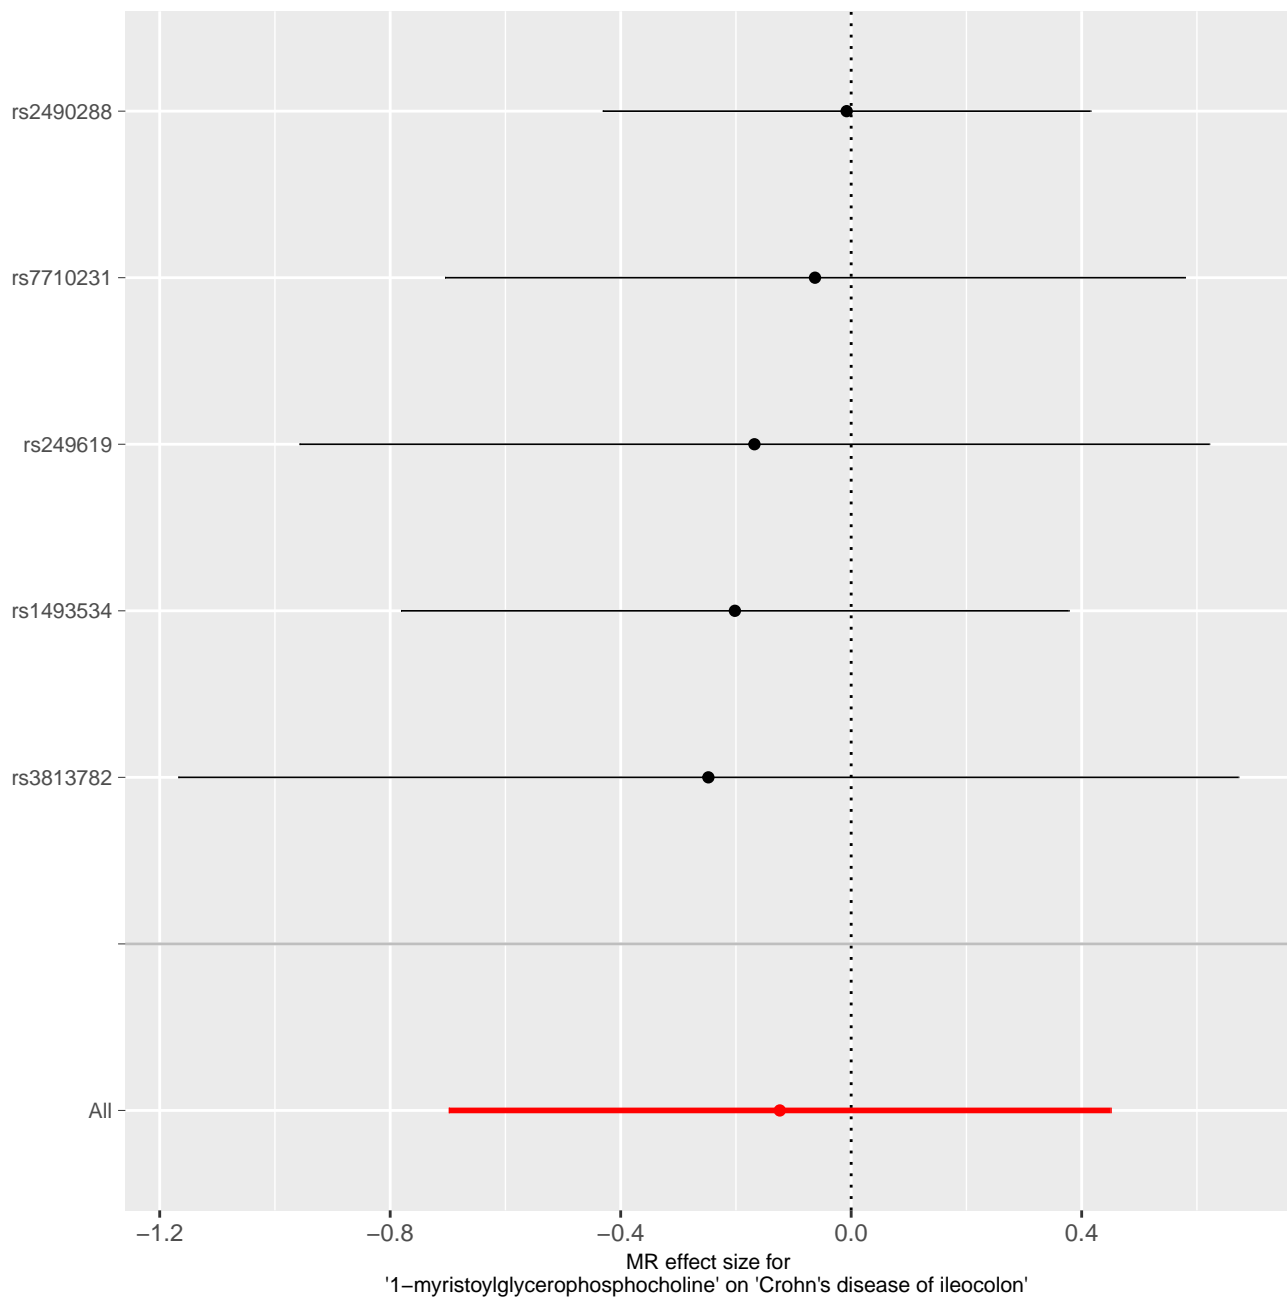

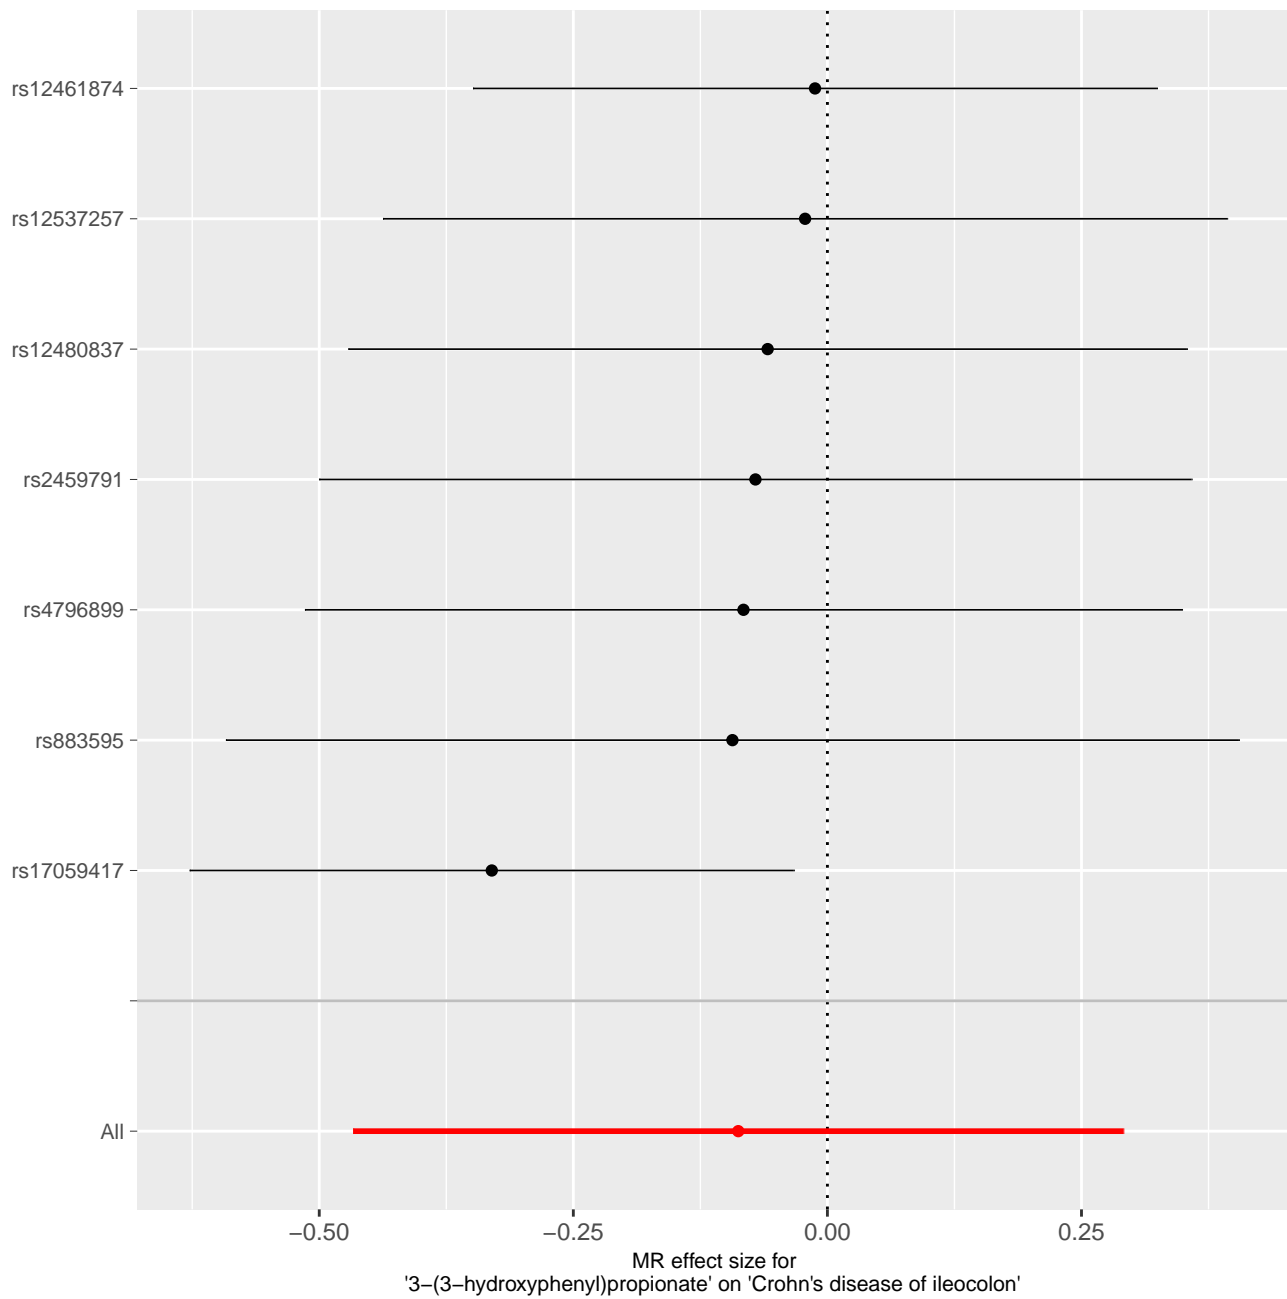

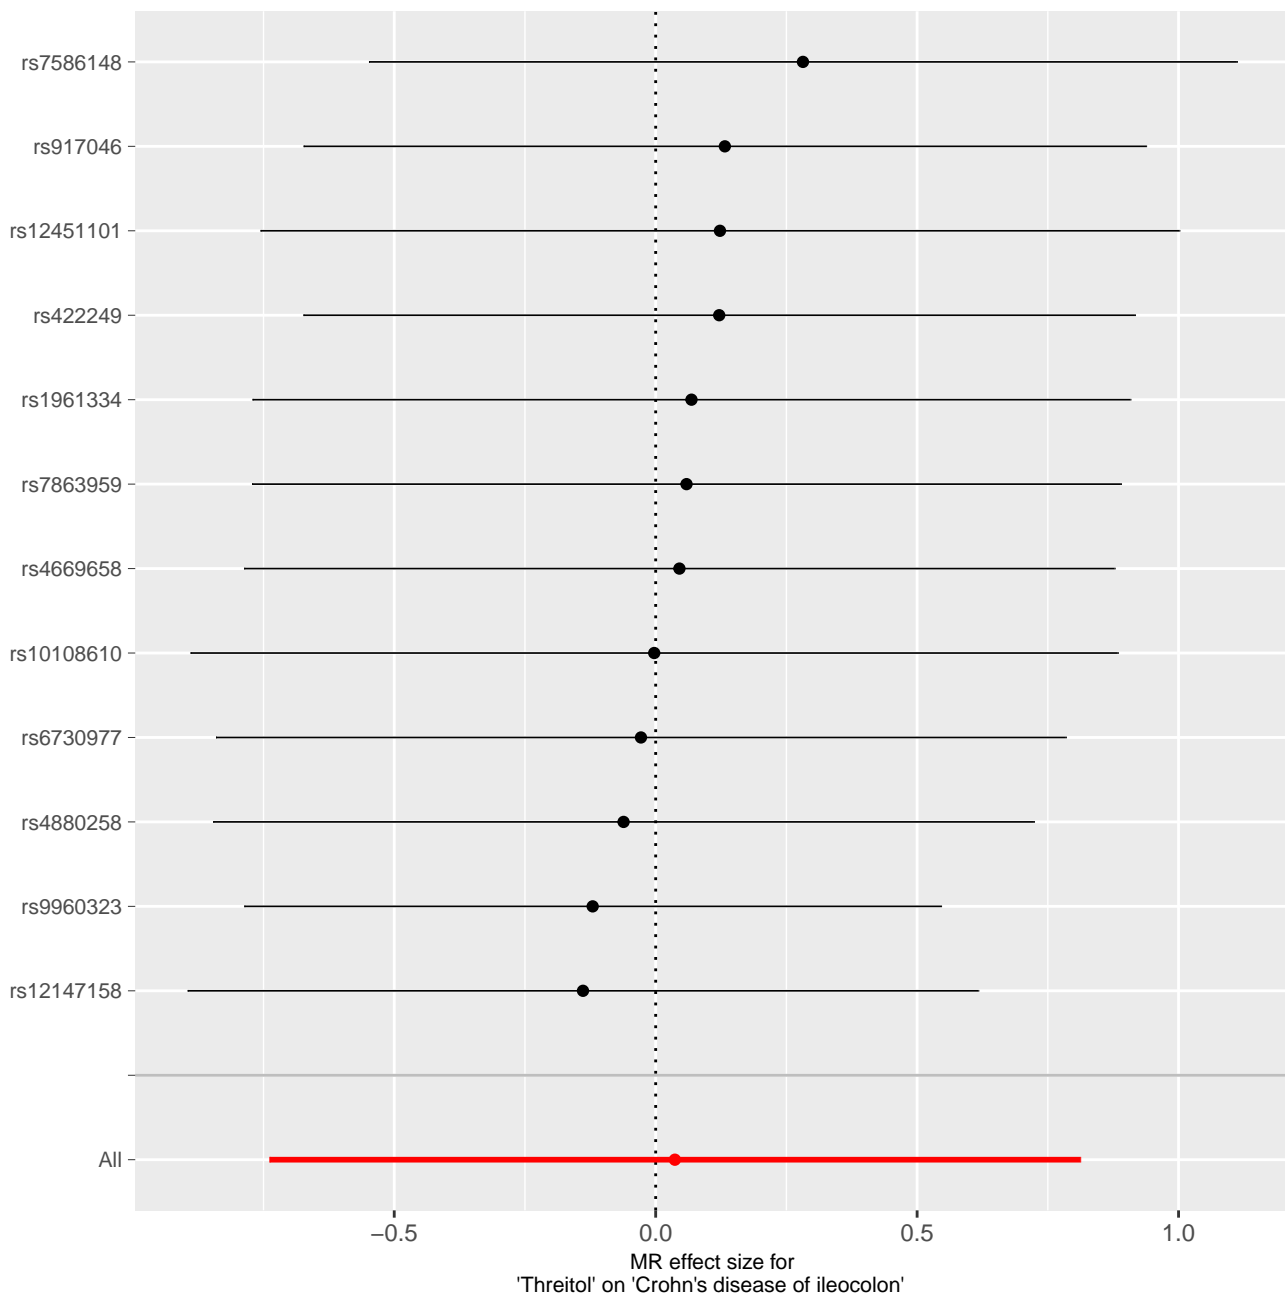

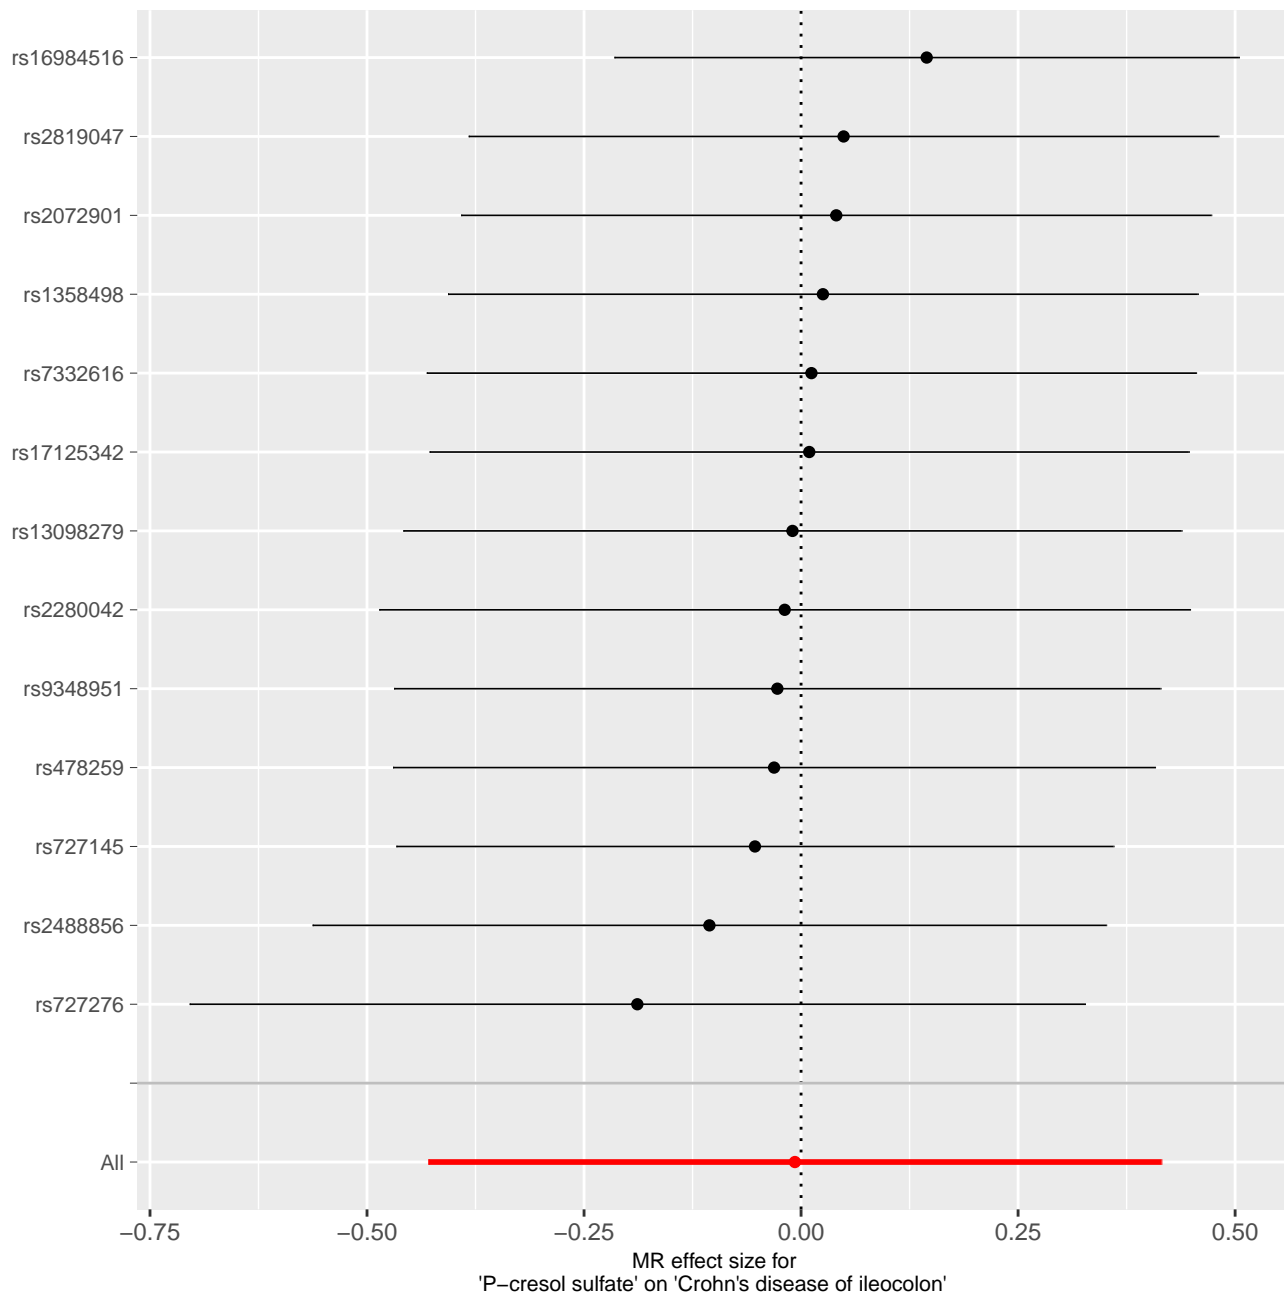

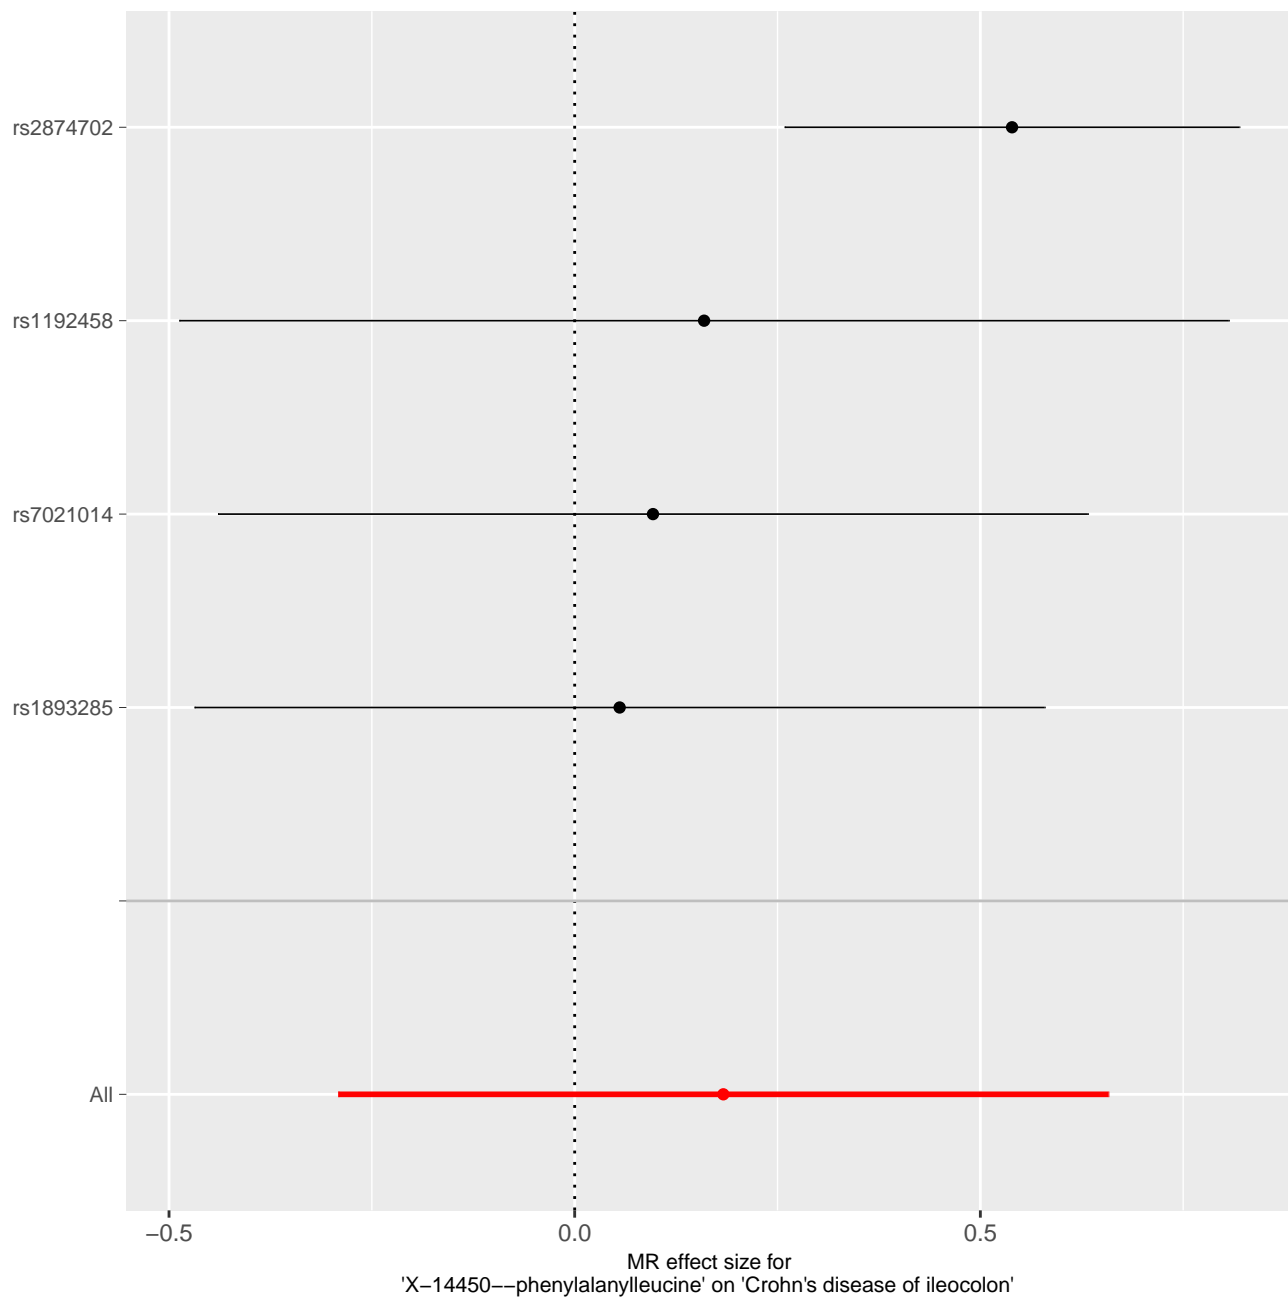

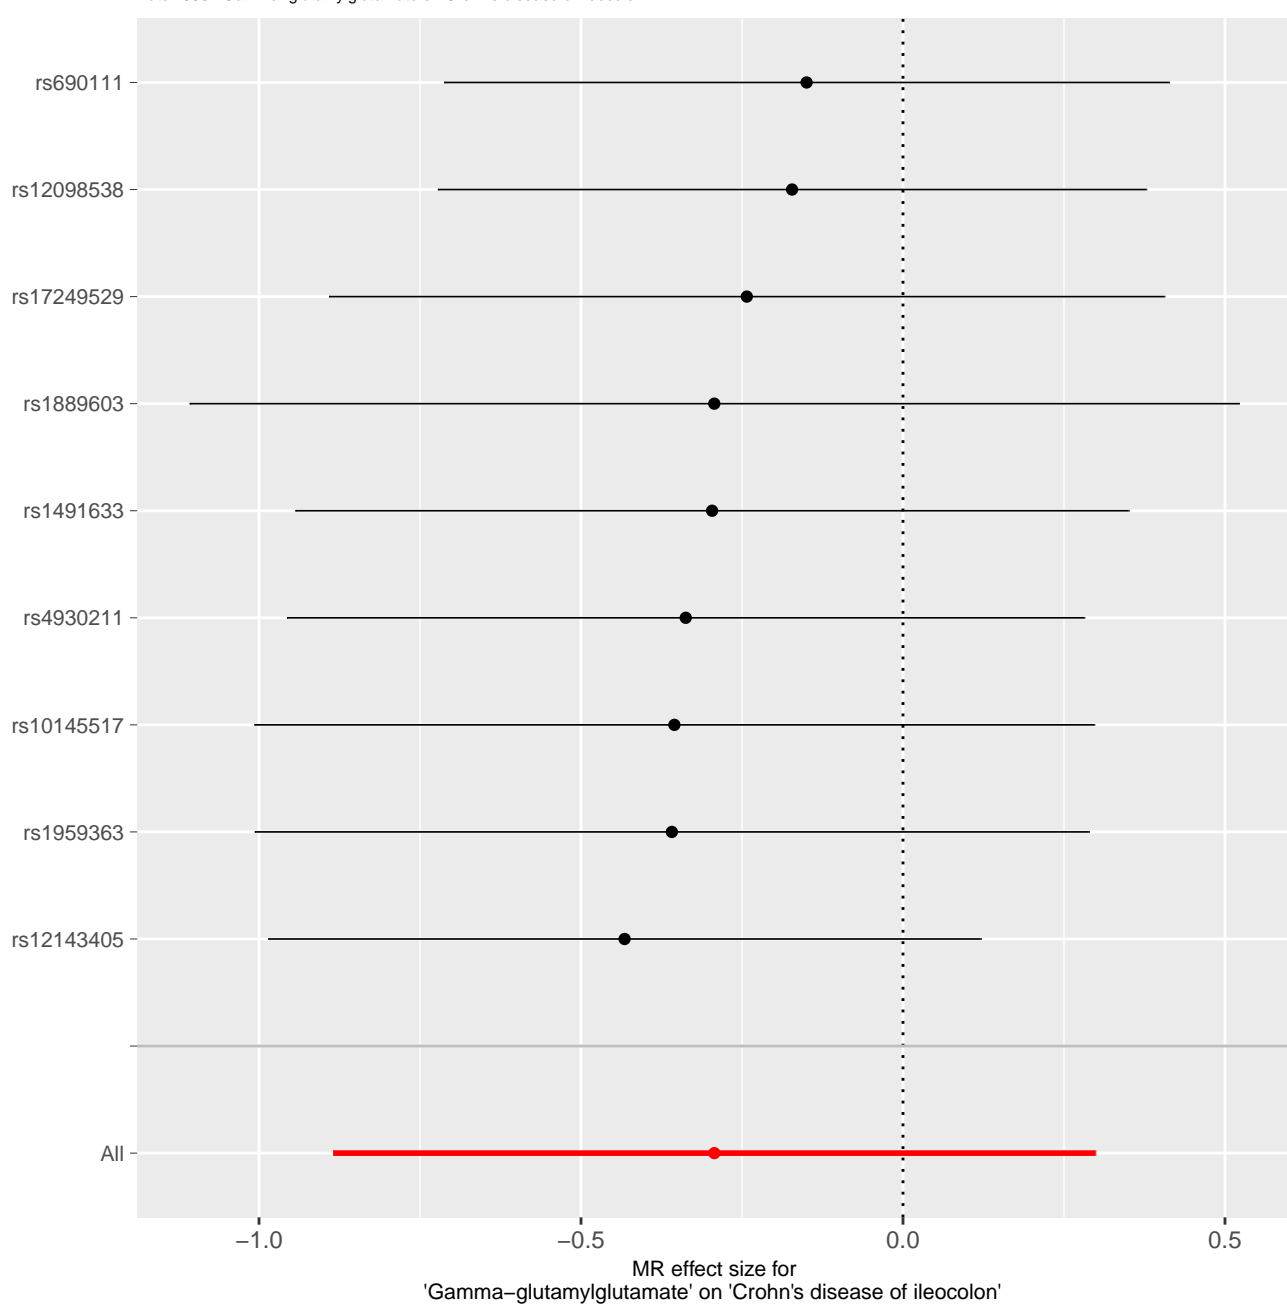



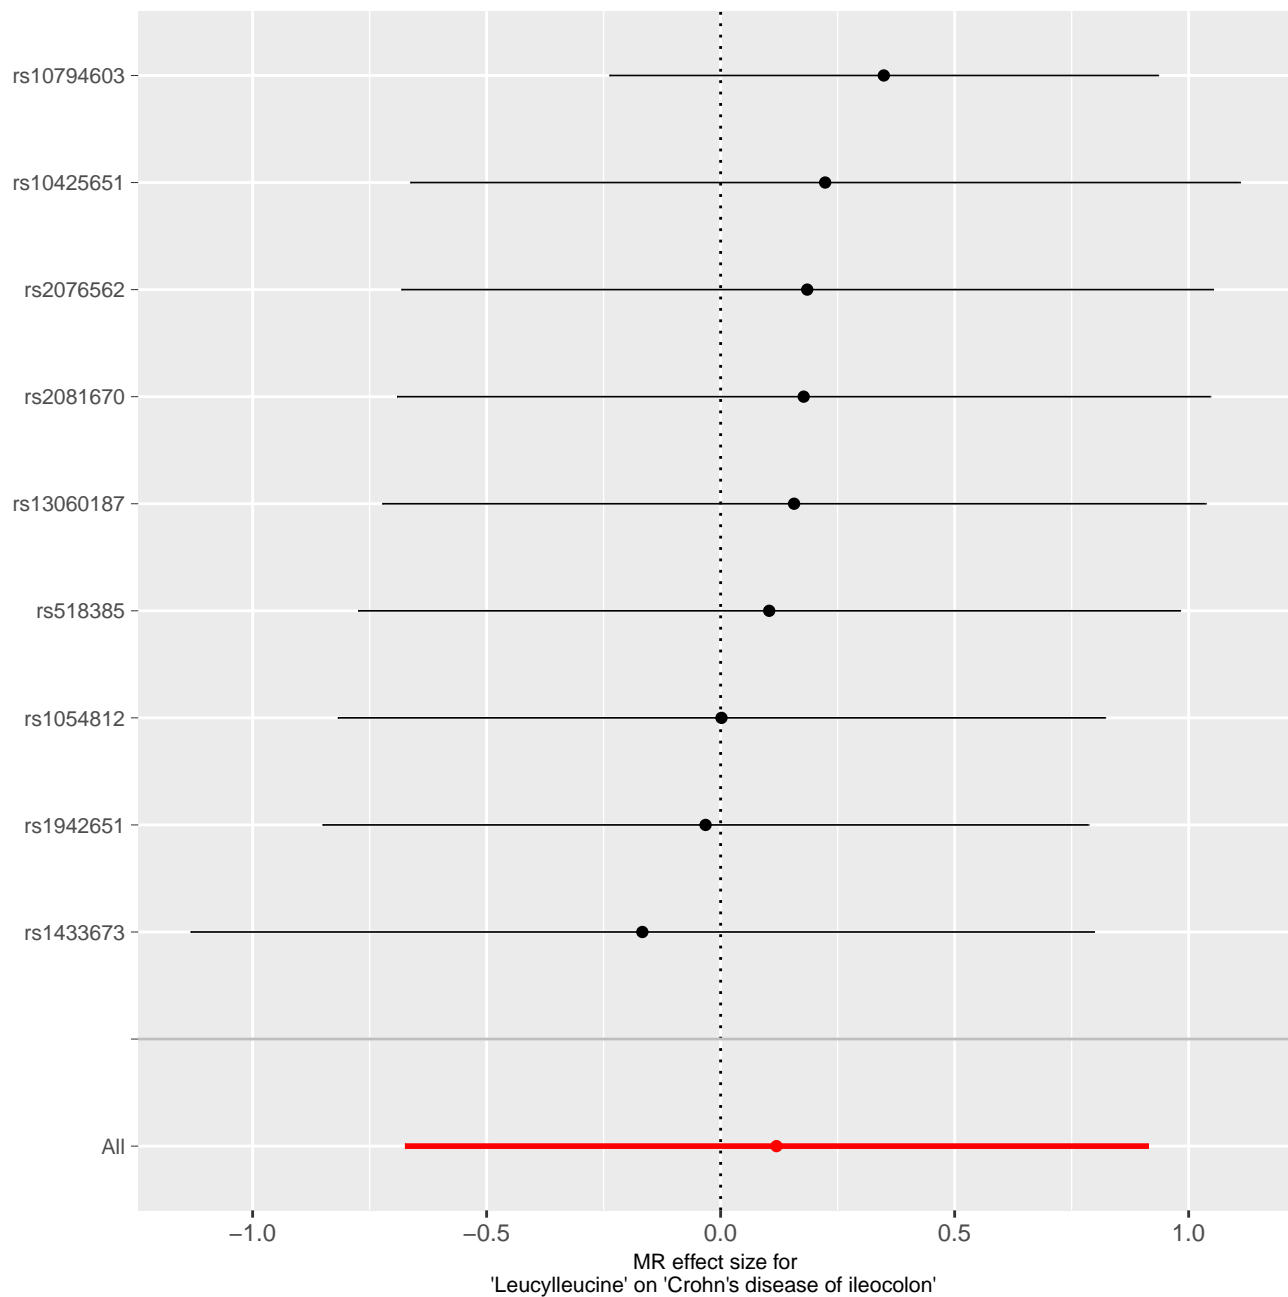

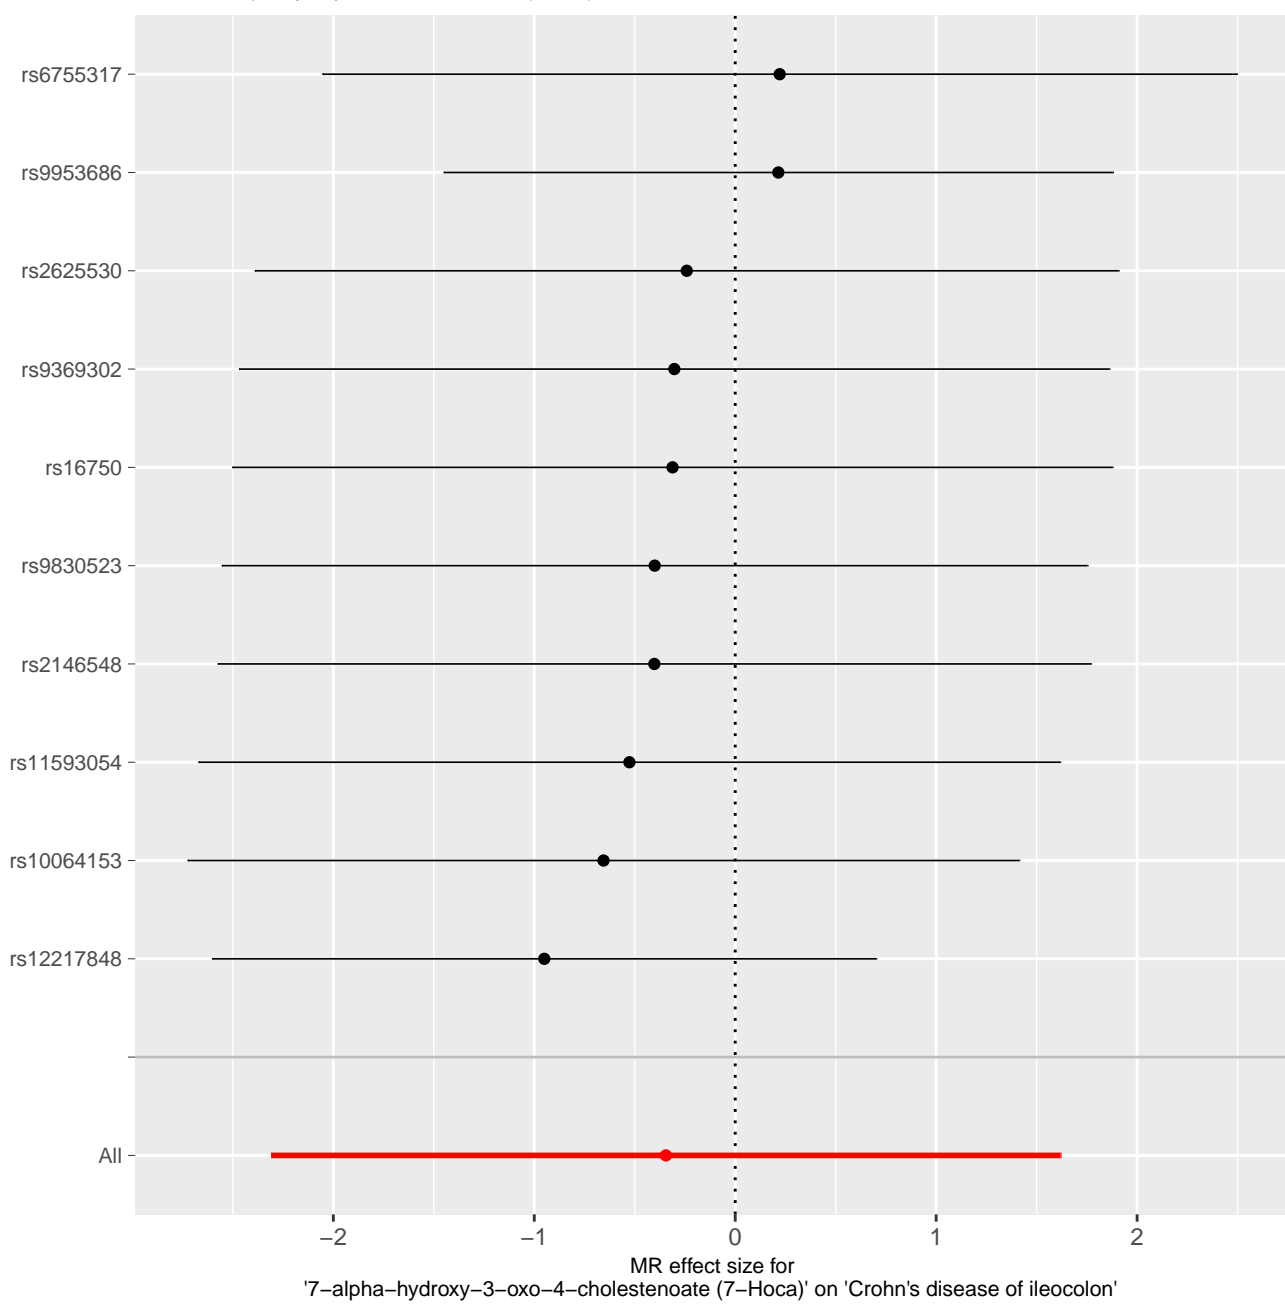

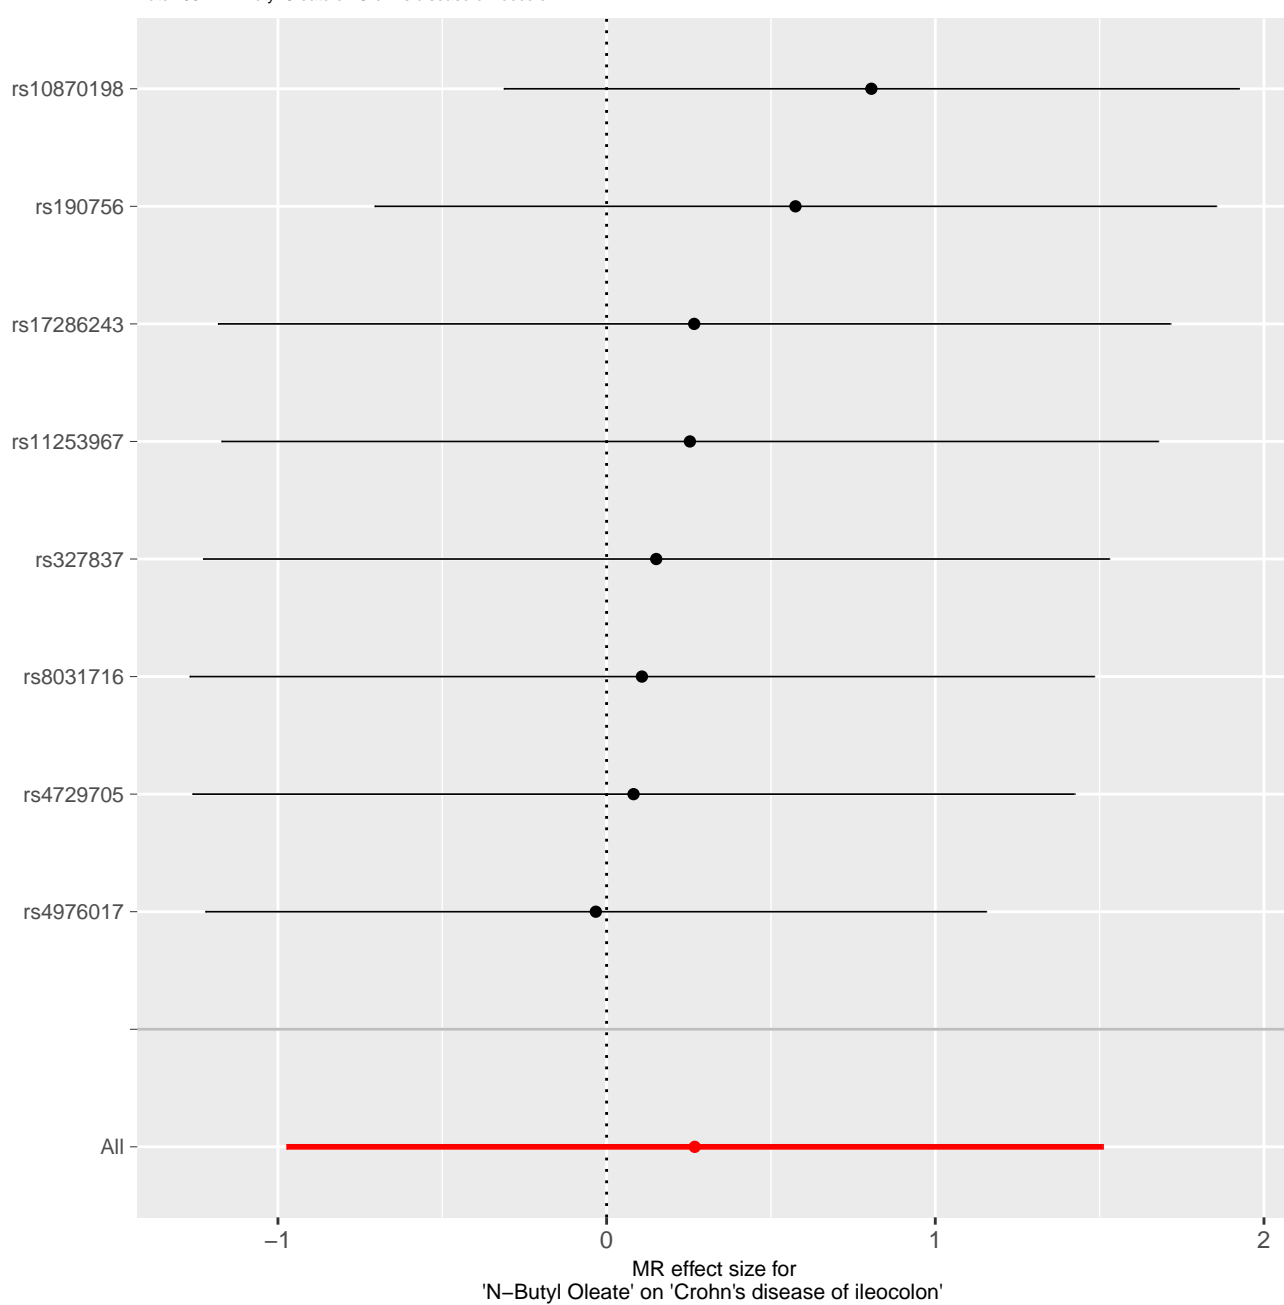

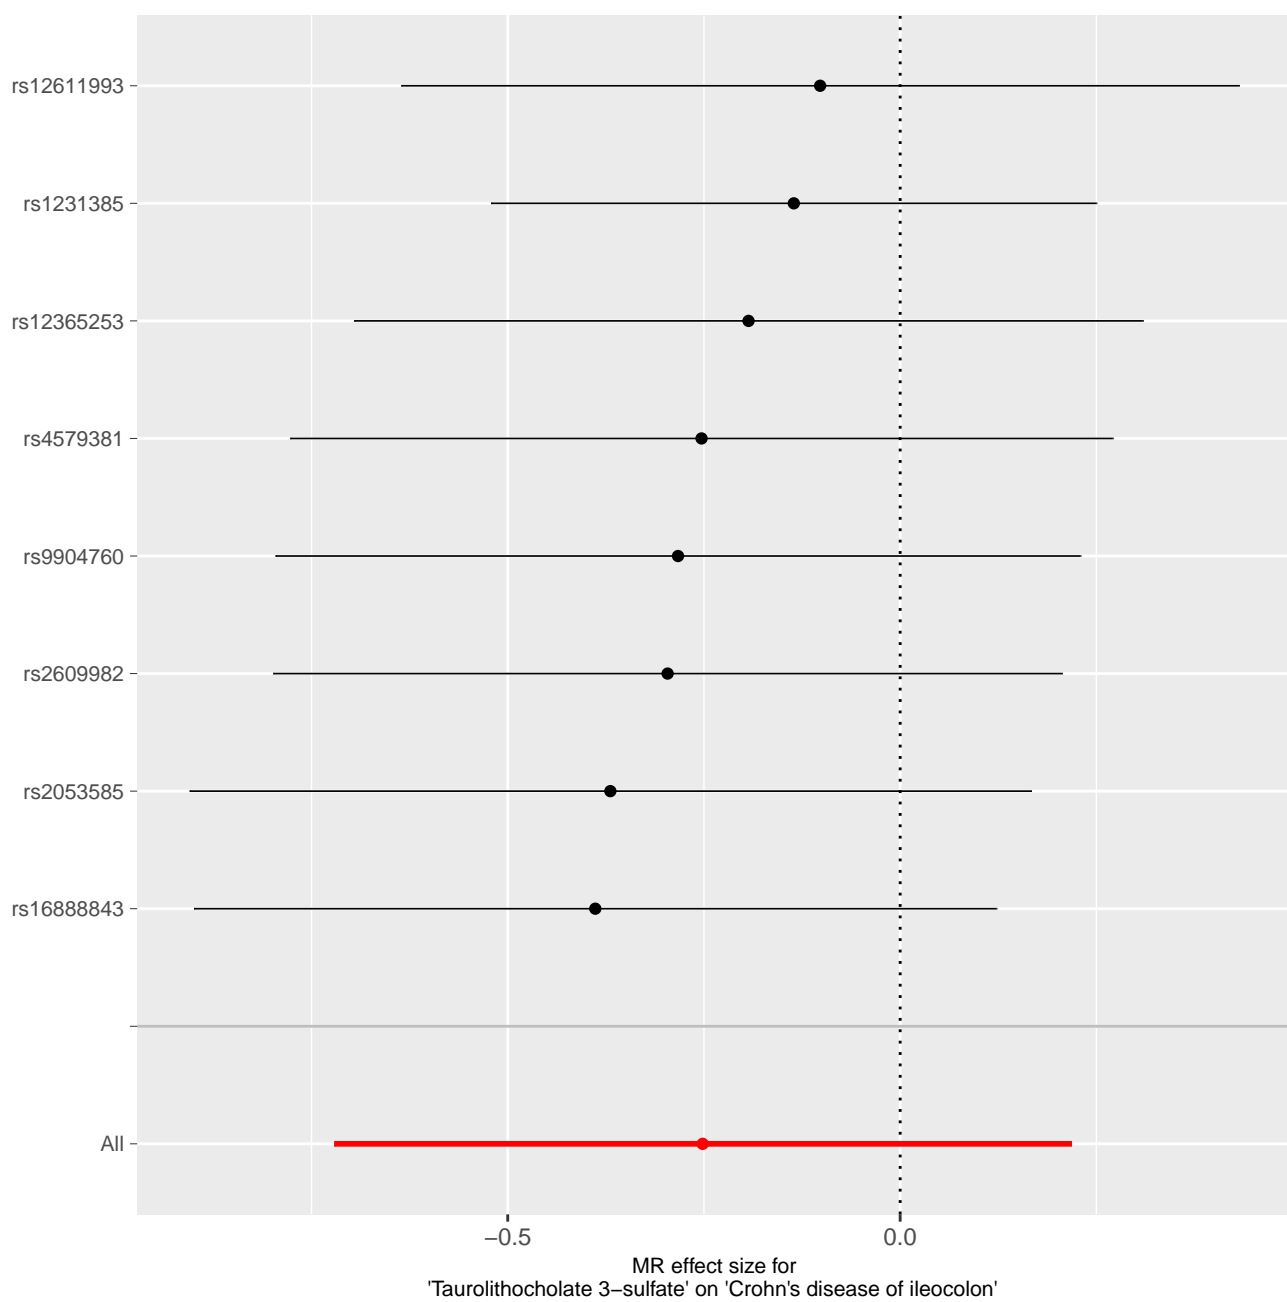

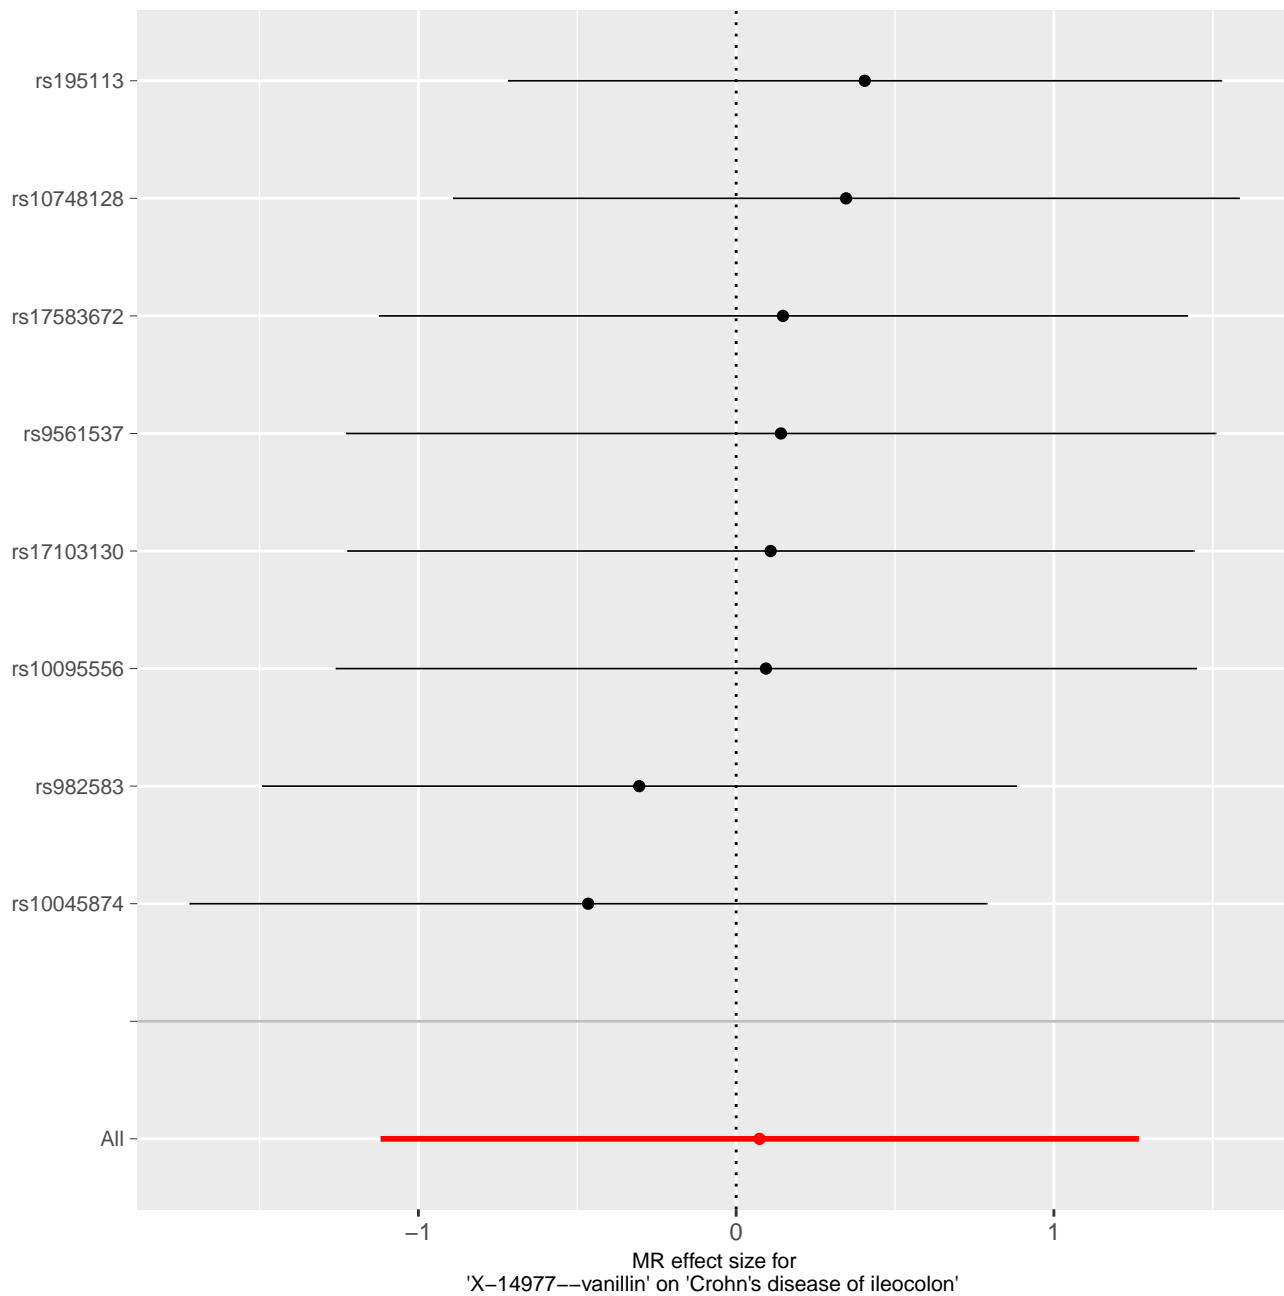

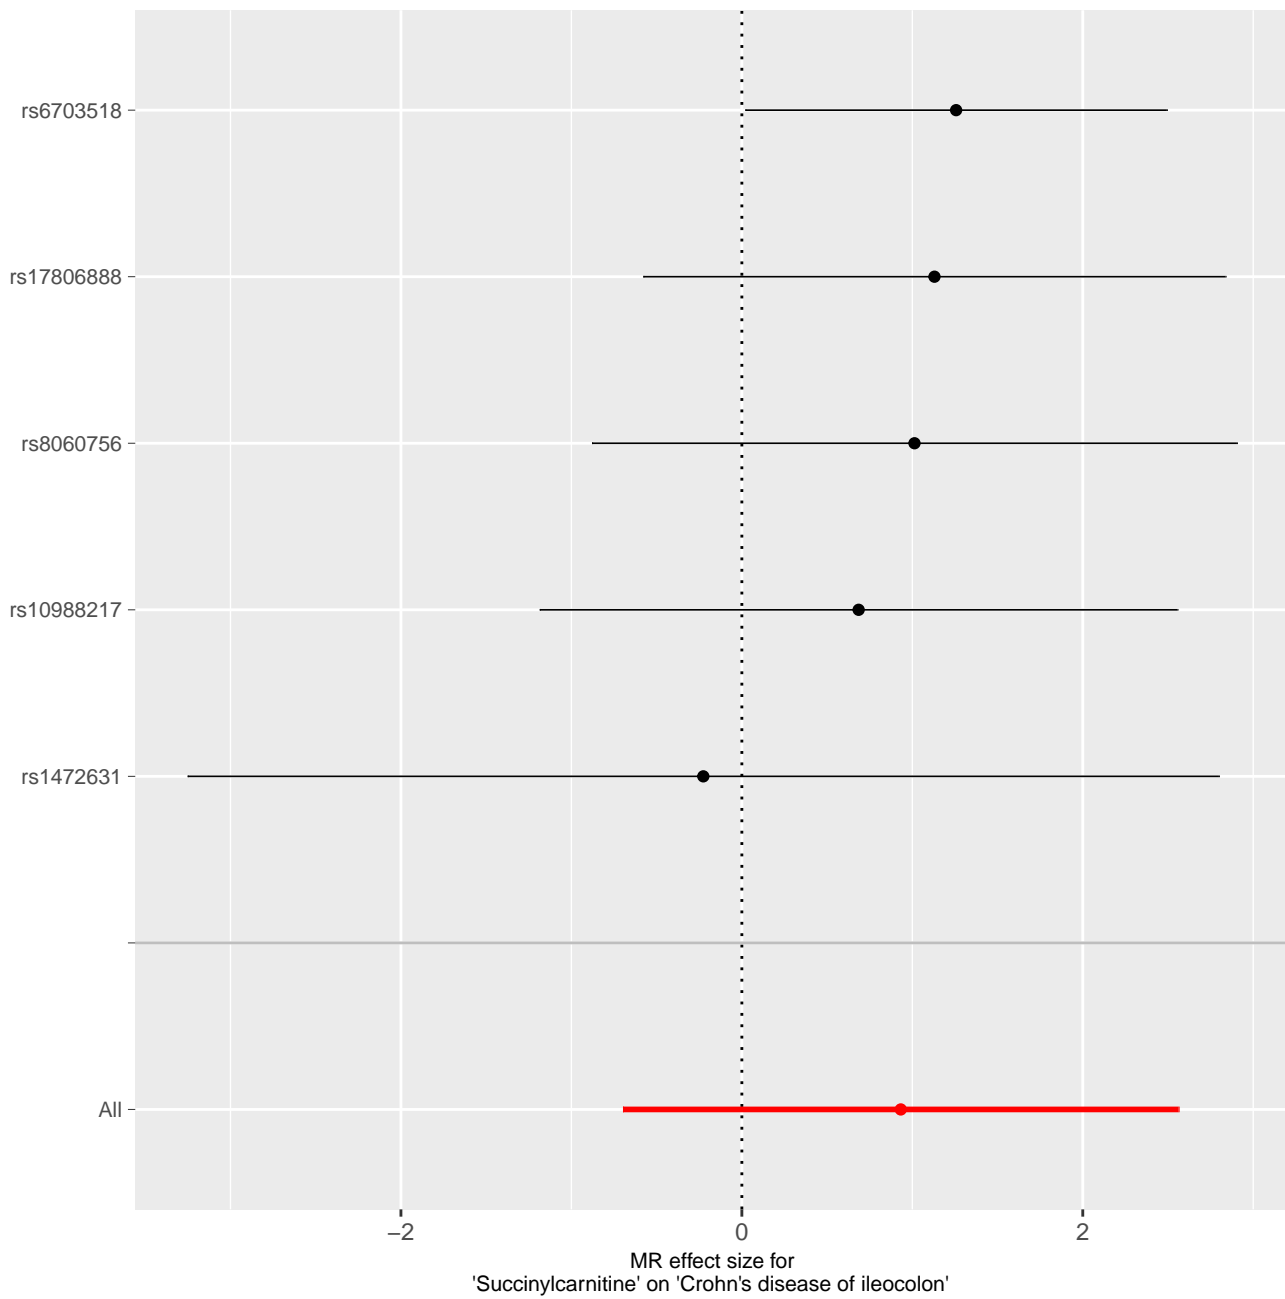

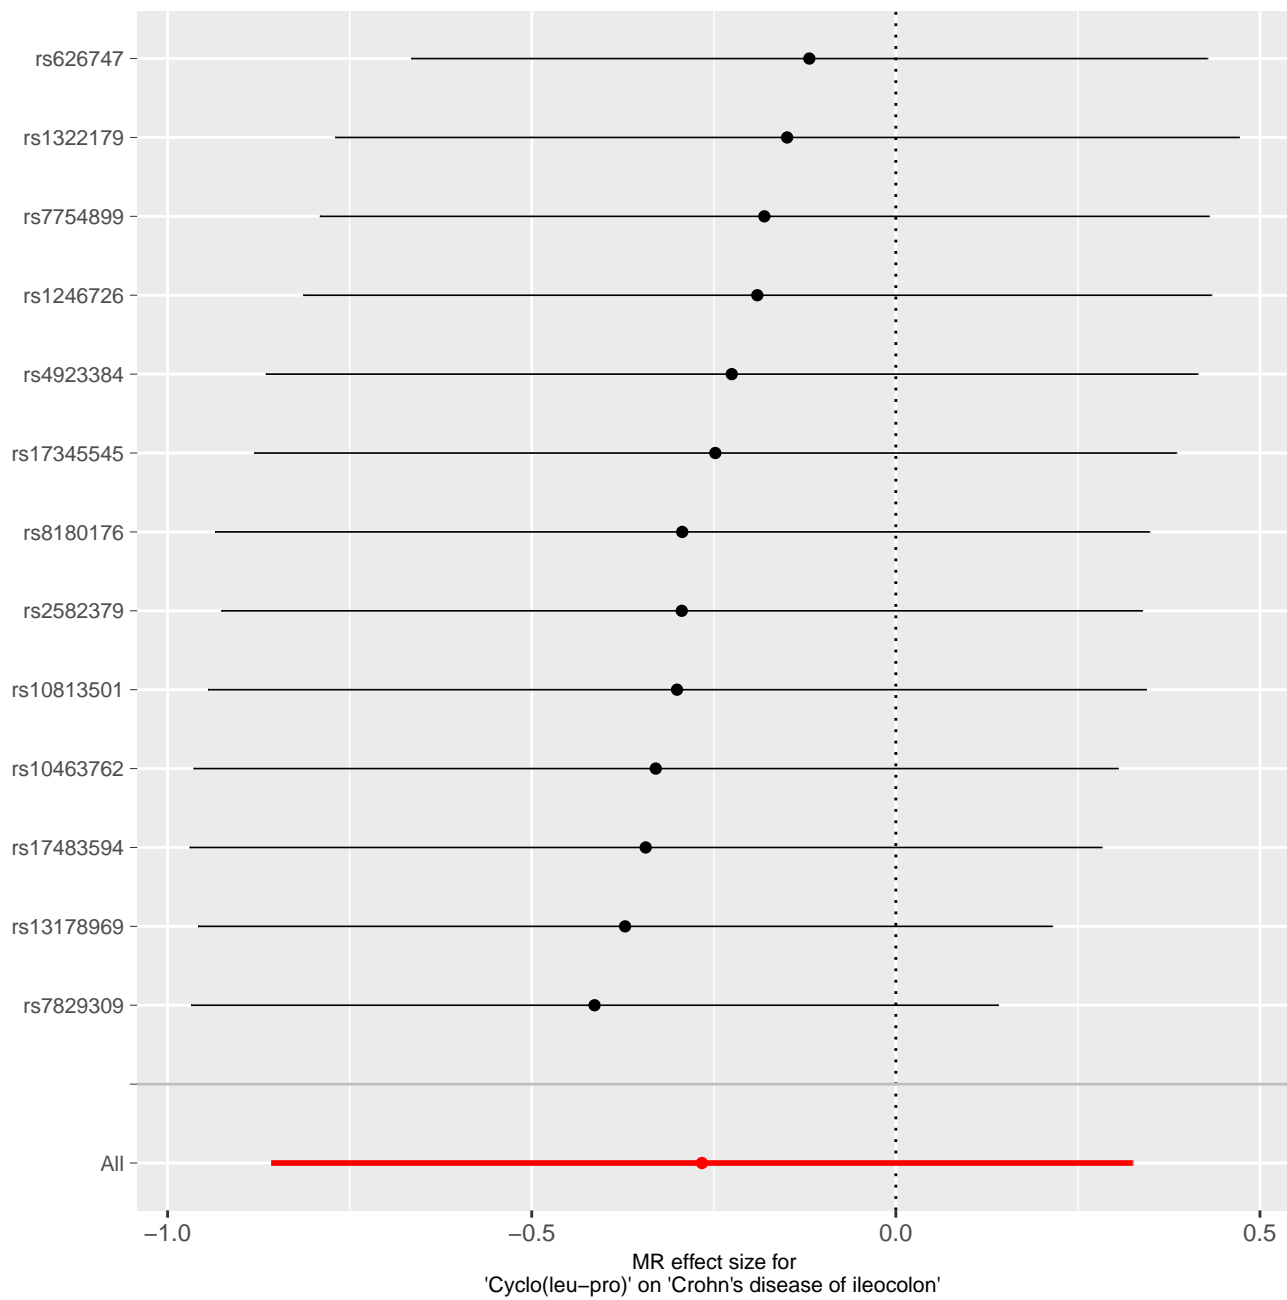

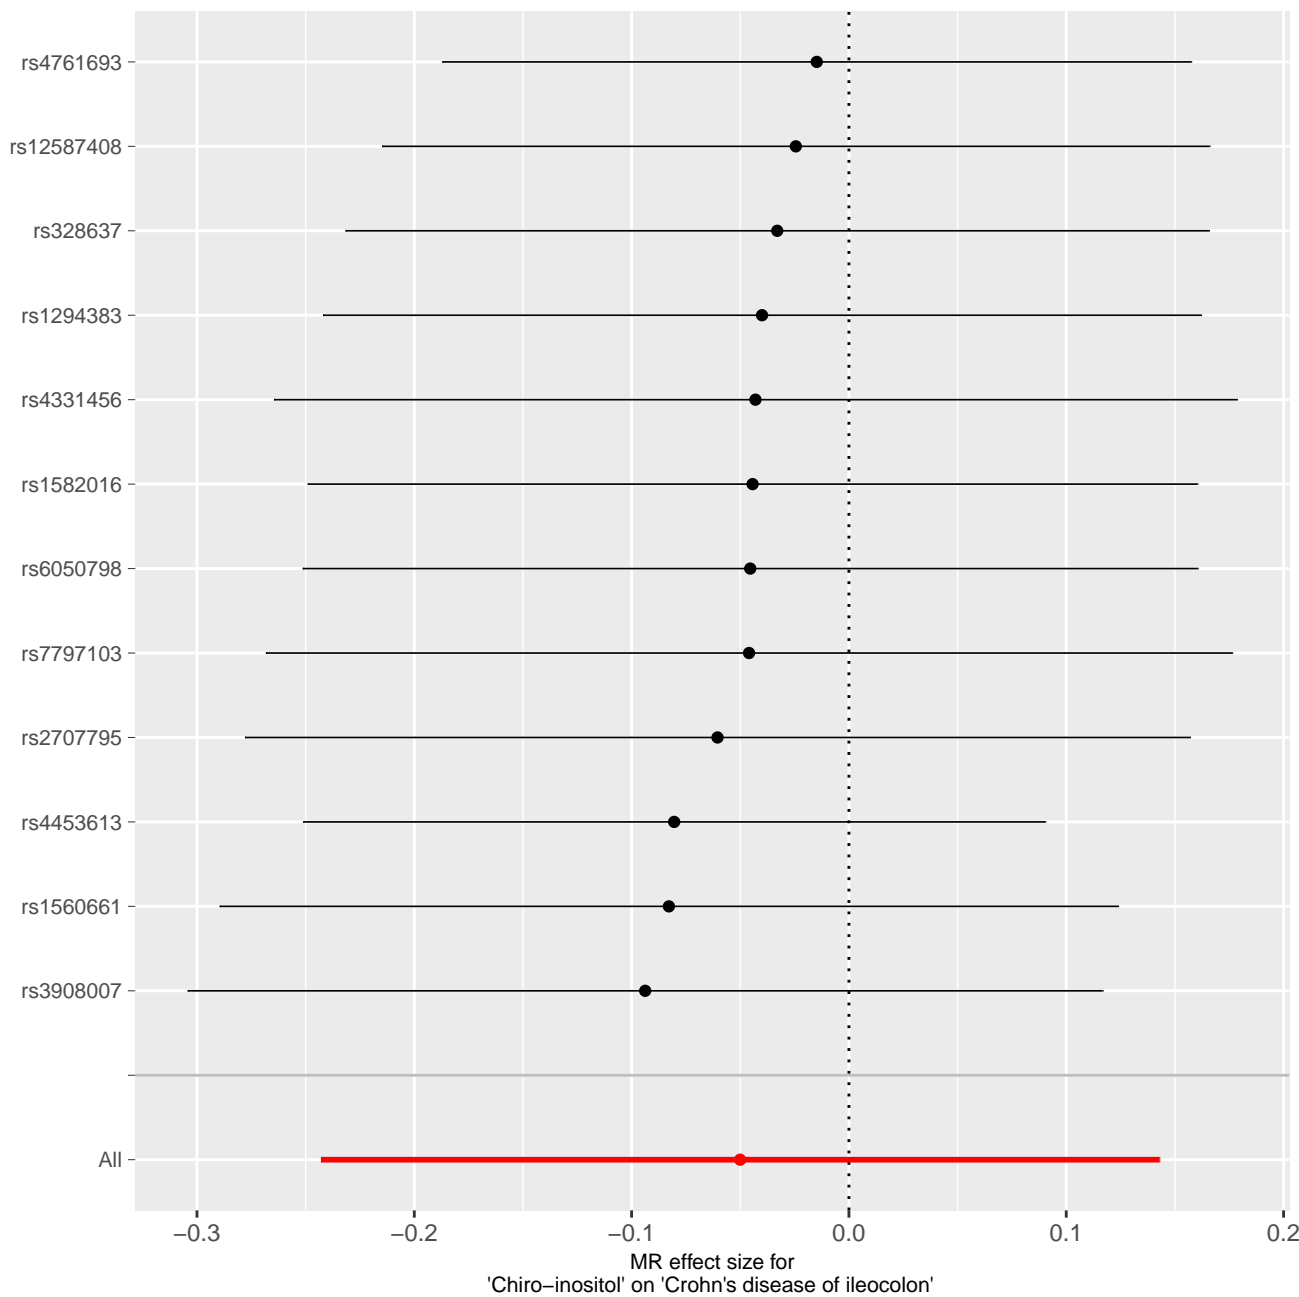



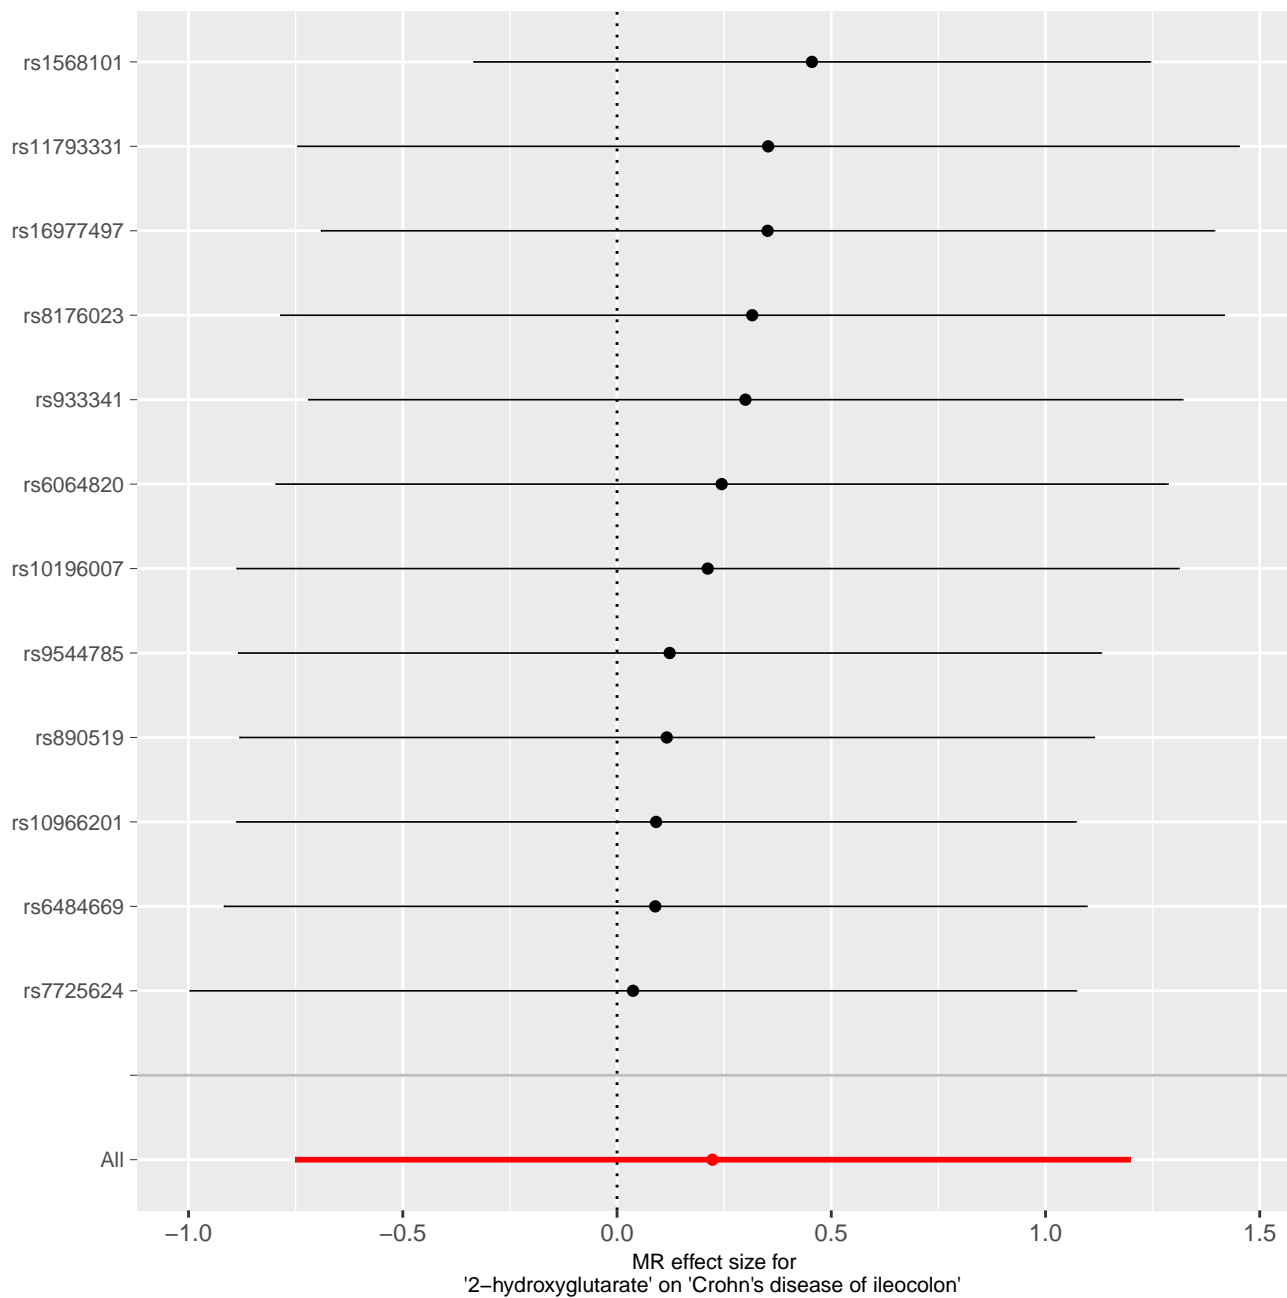

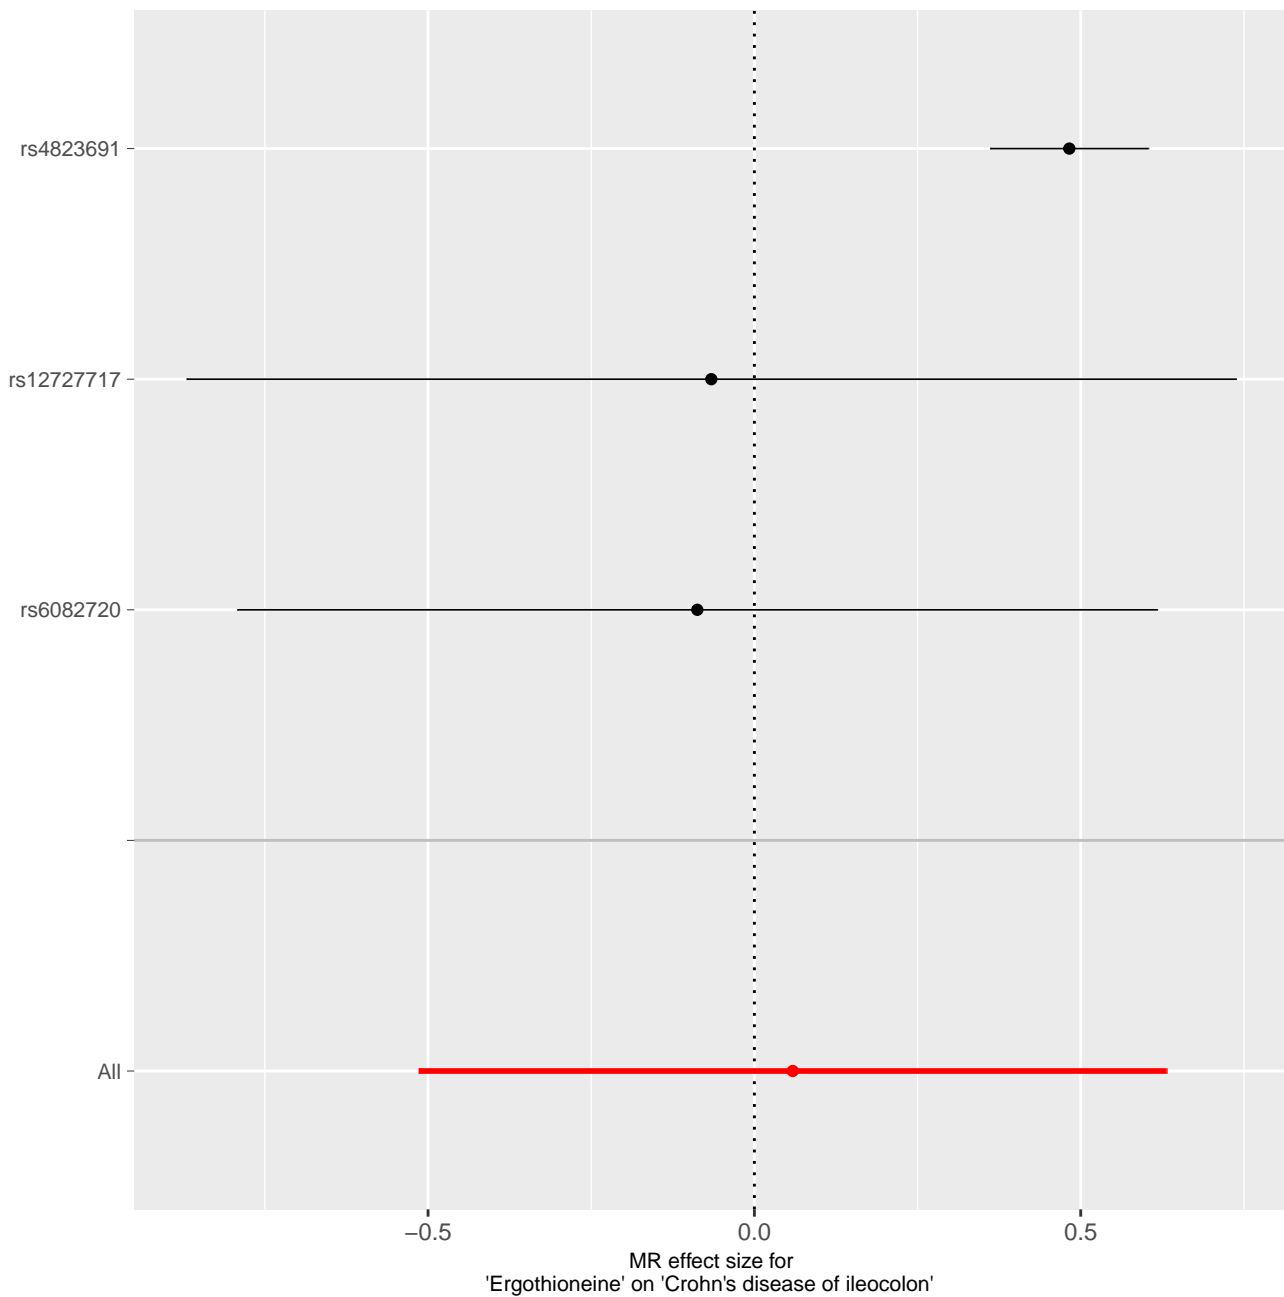

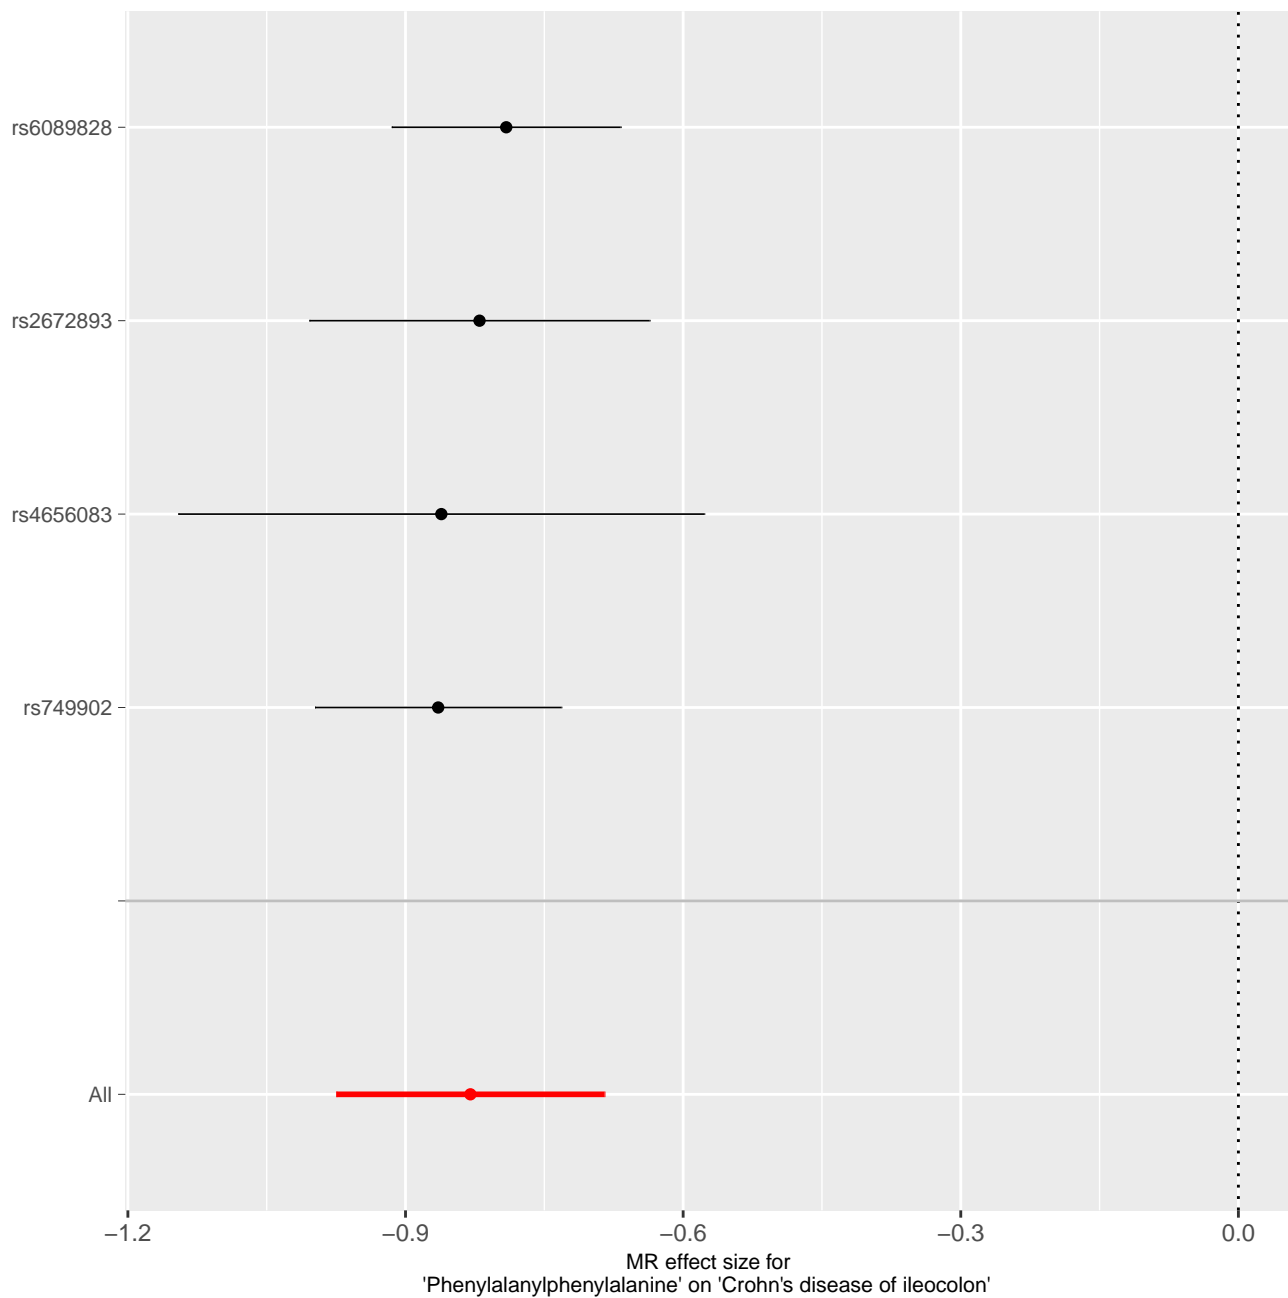

Batch 550 : 15-methylpalmitate (isobar with 2-methylpalmitate) on Crohn's disease of ileocolon

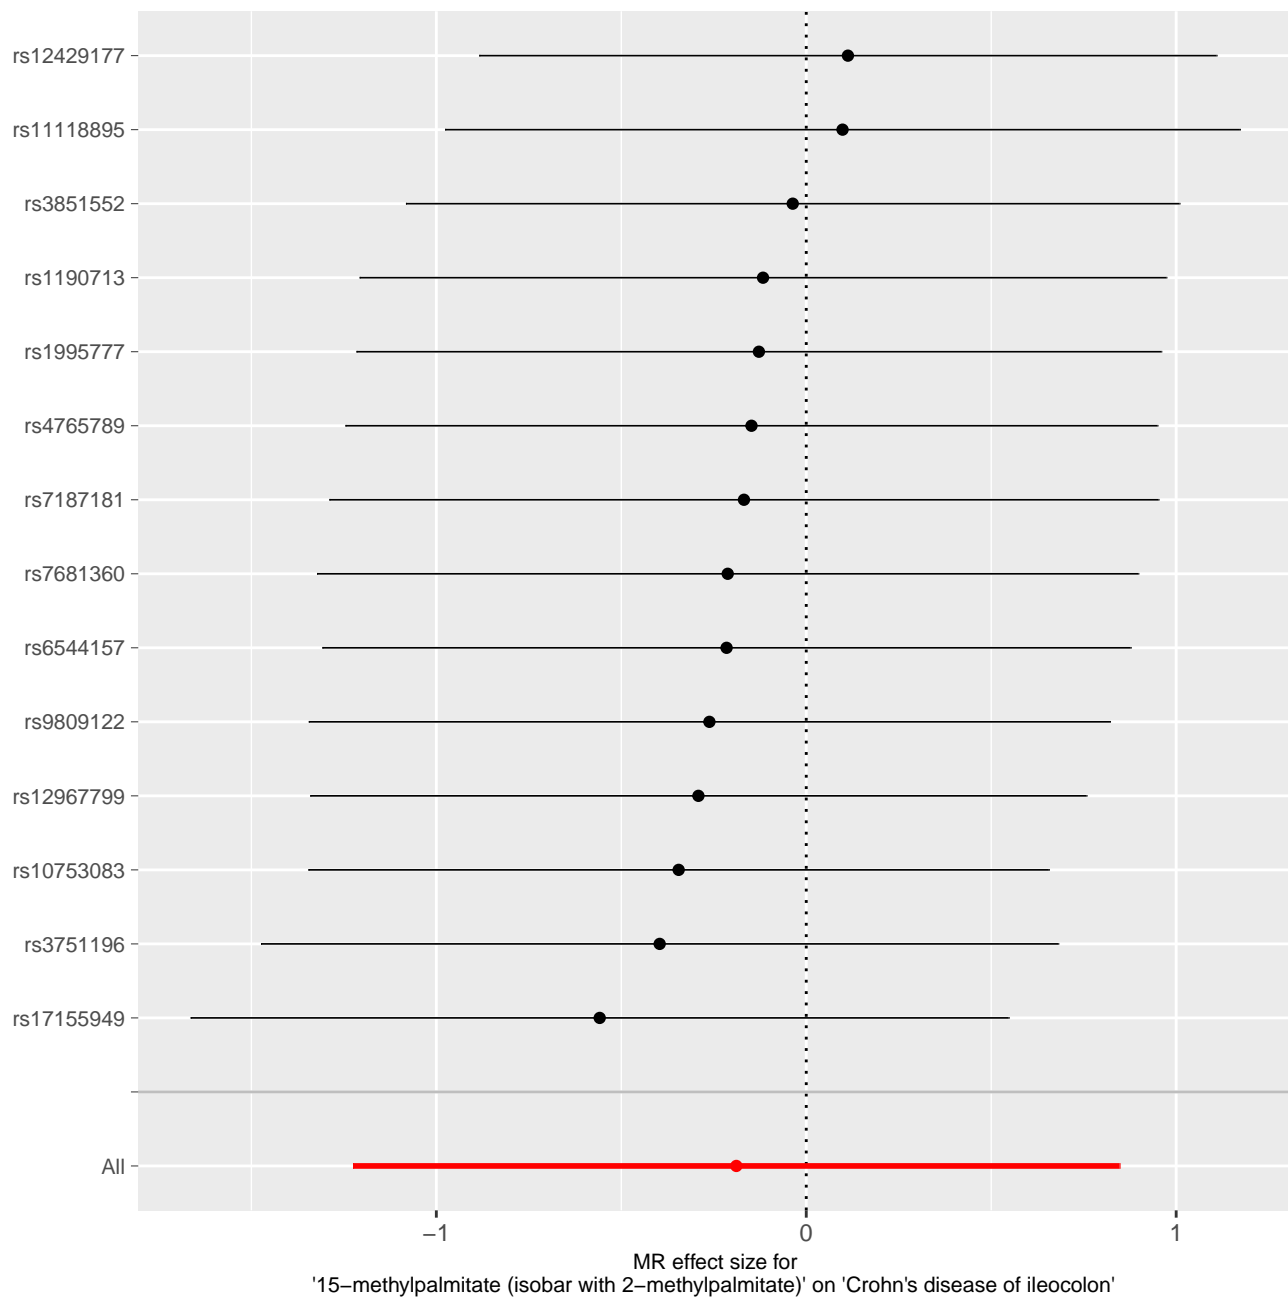

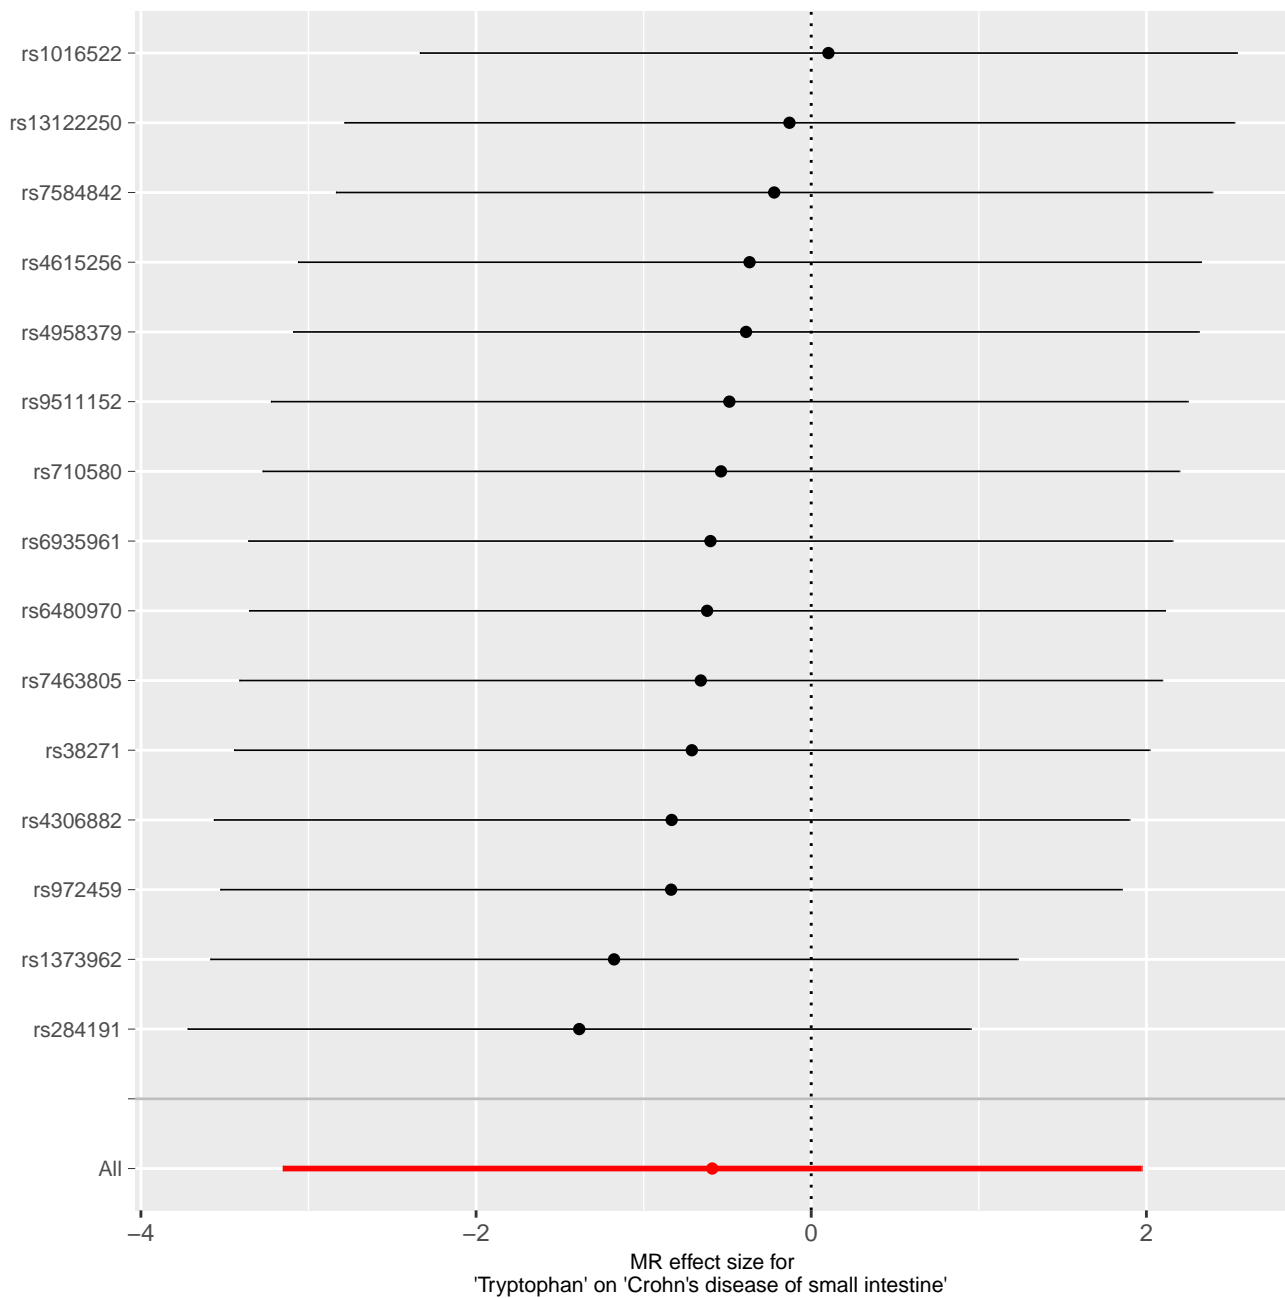

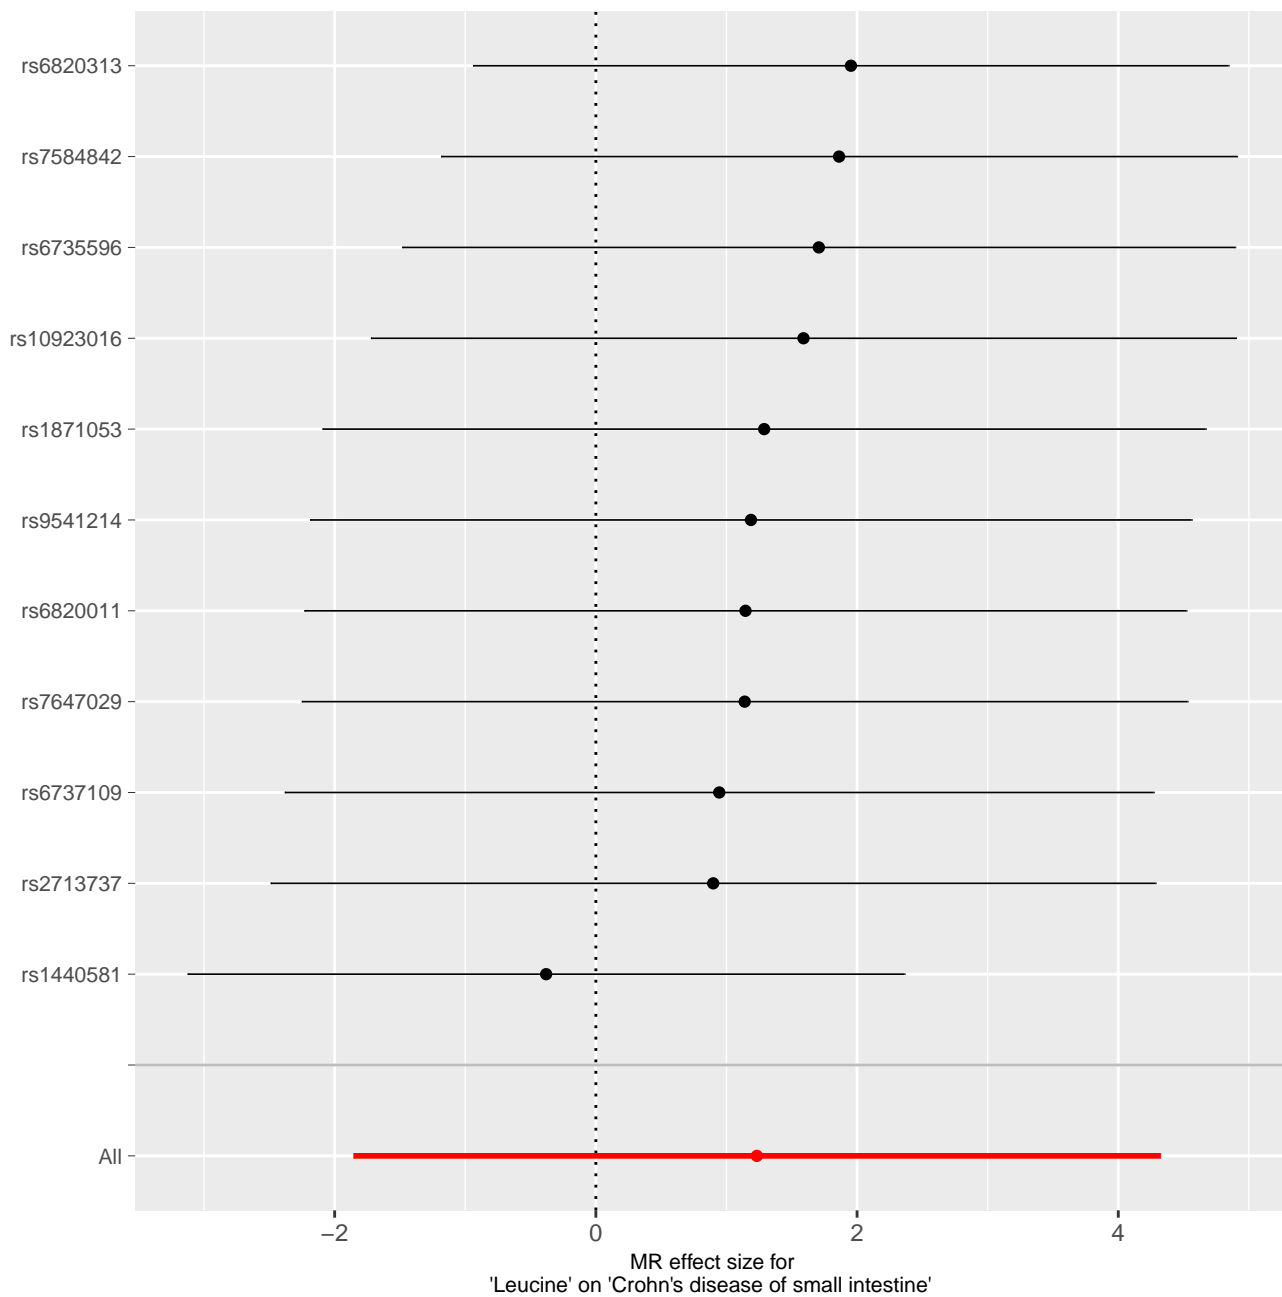

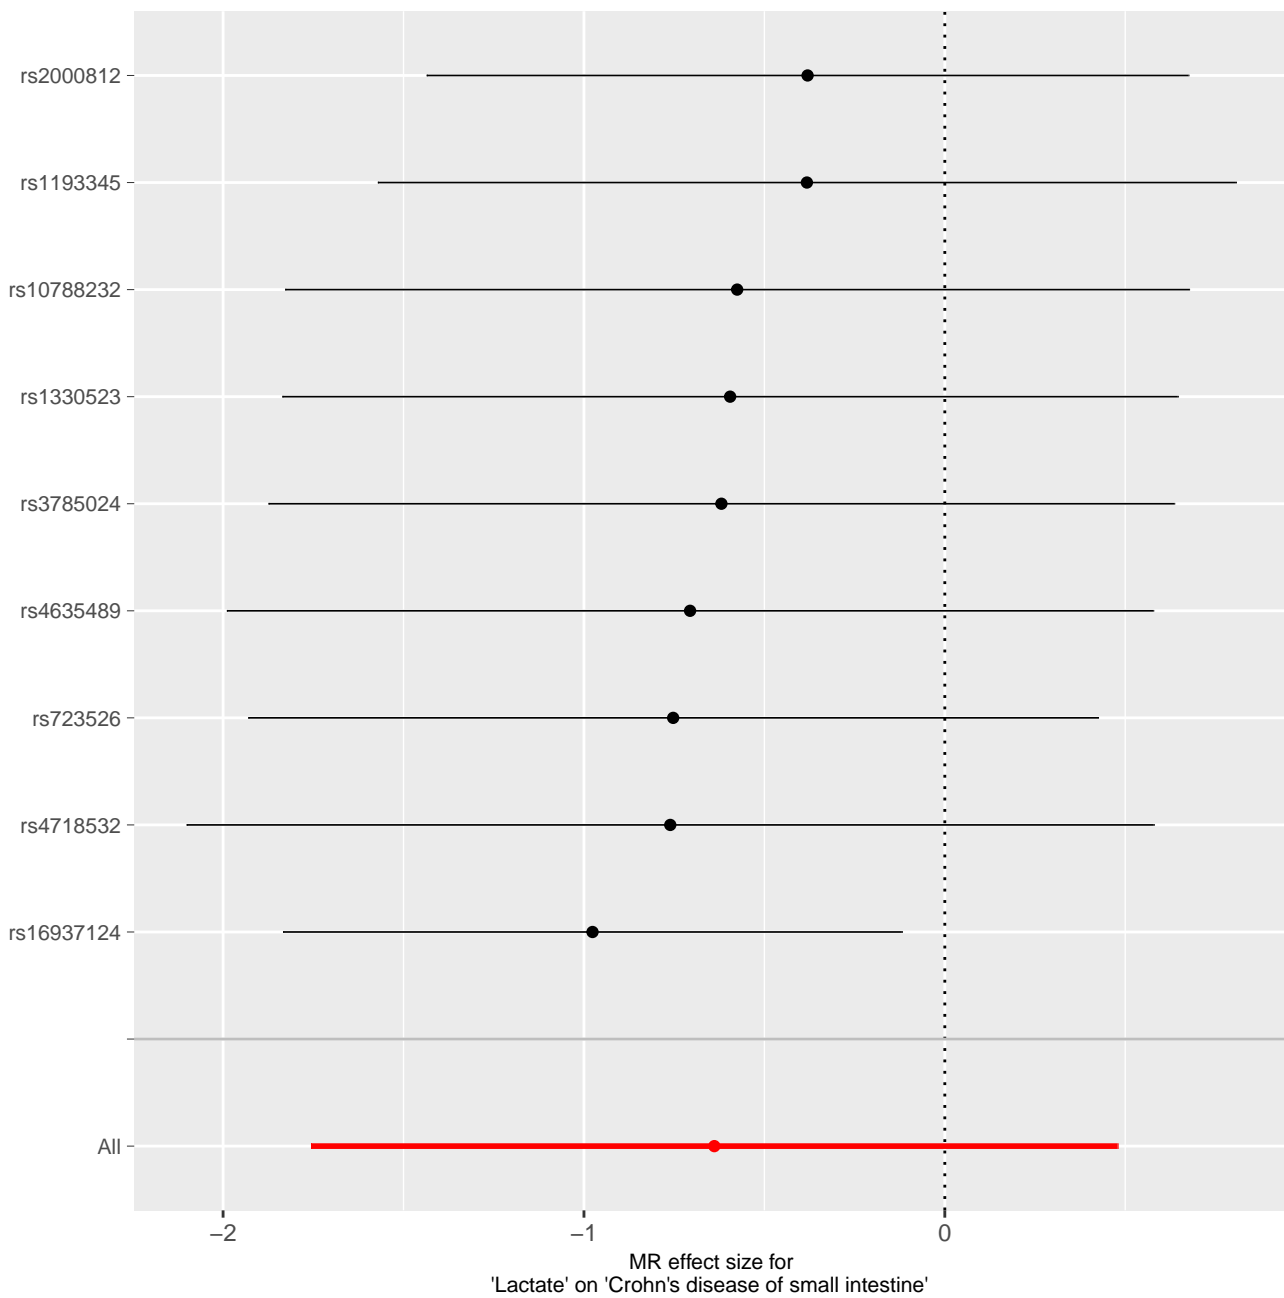

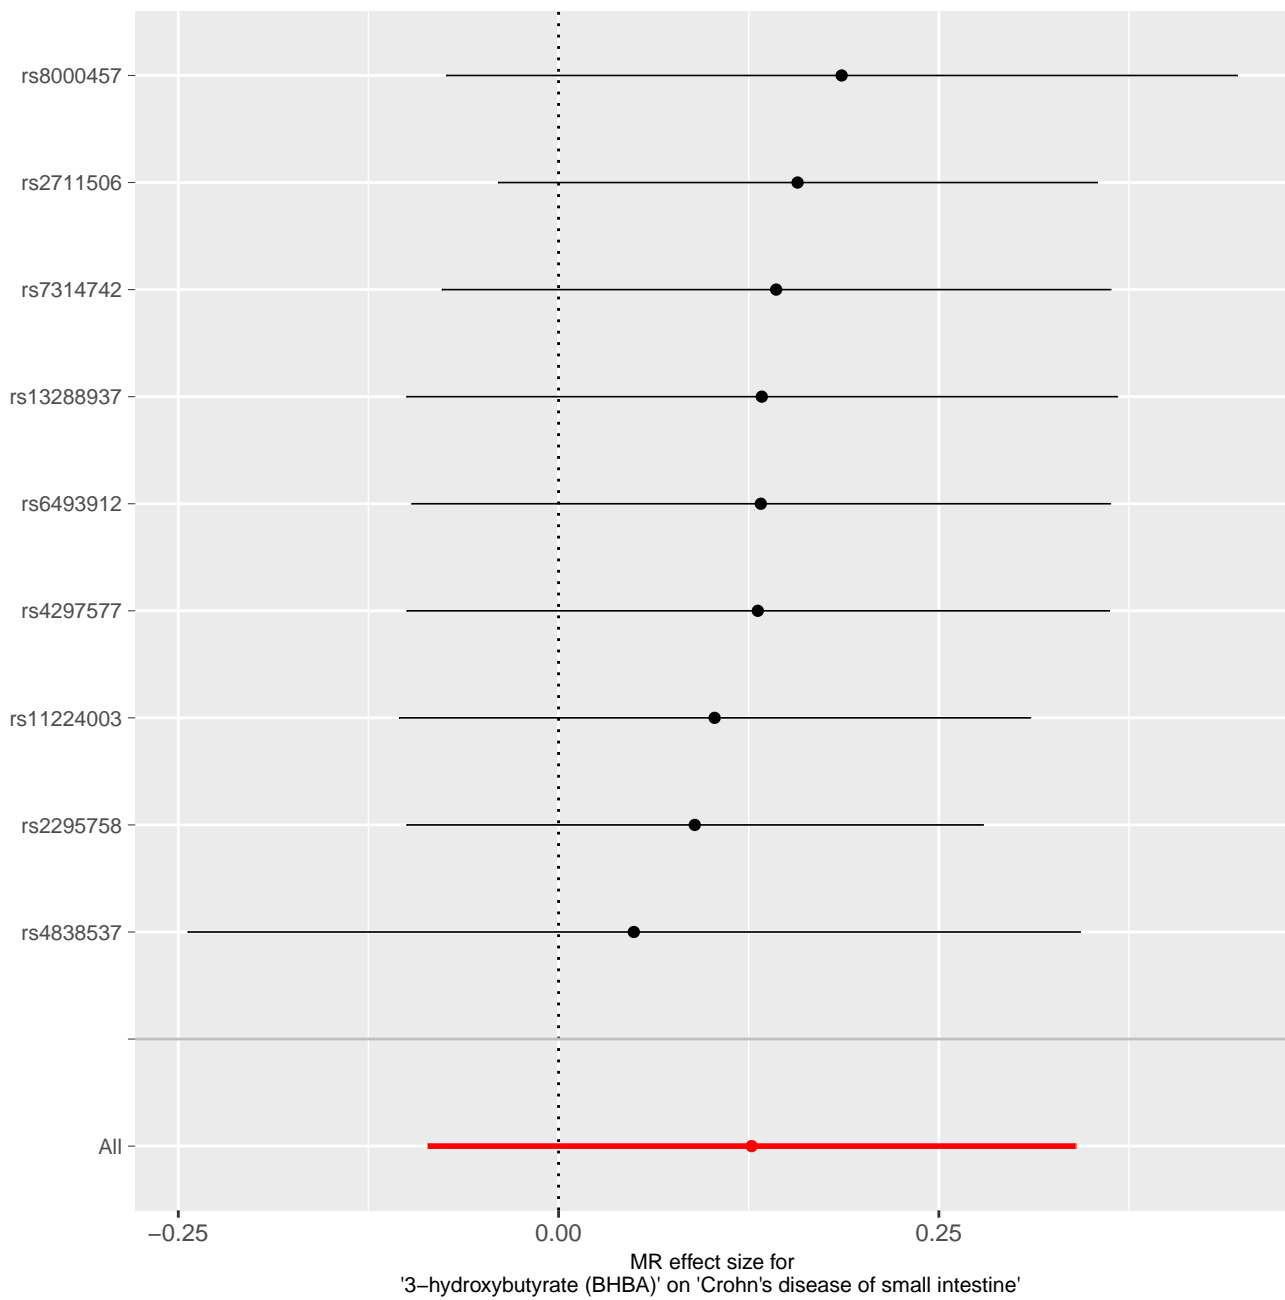



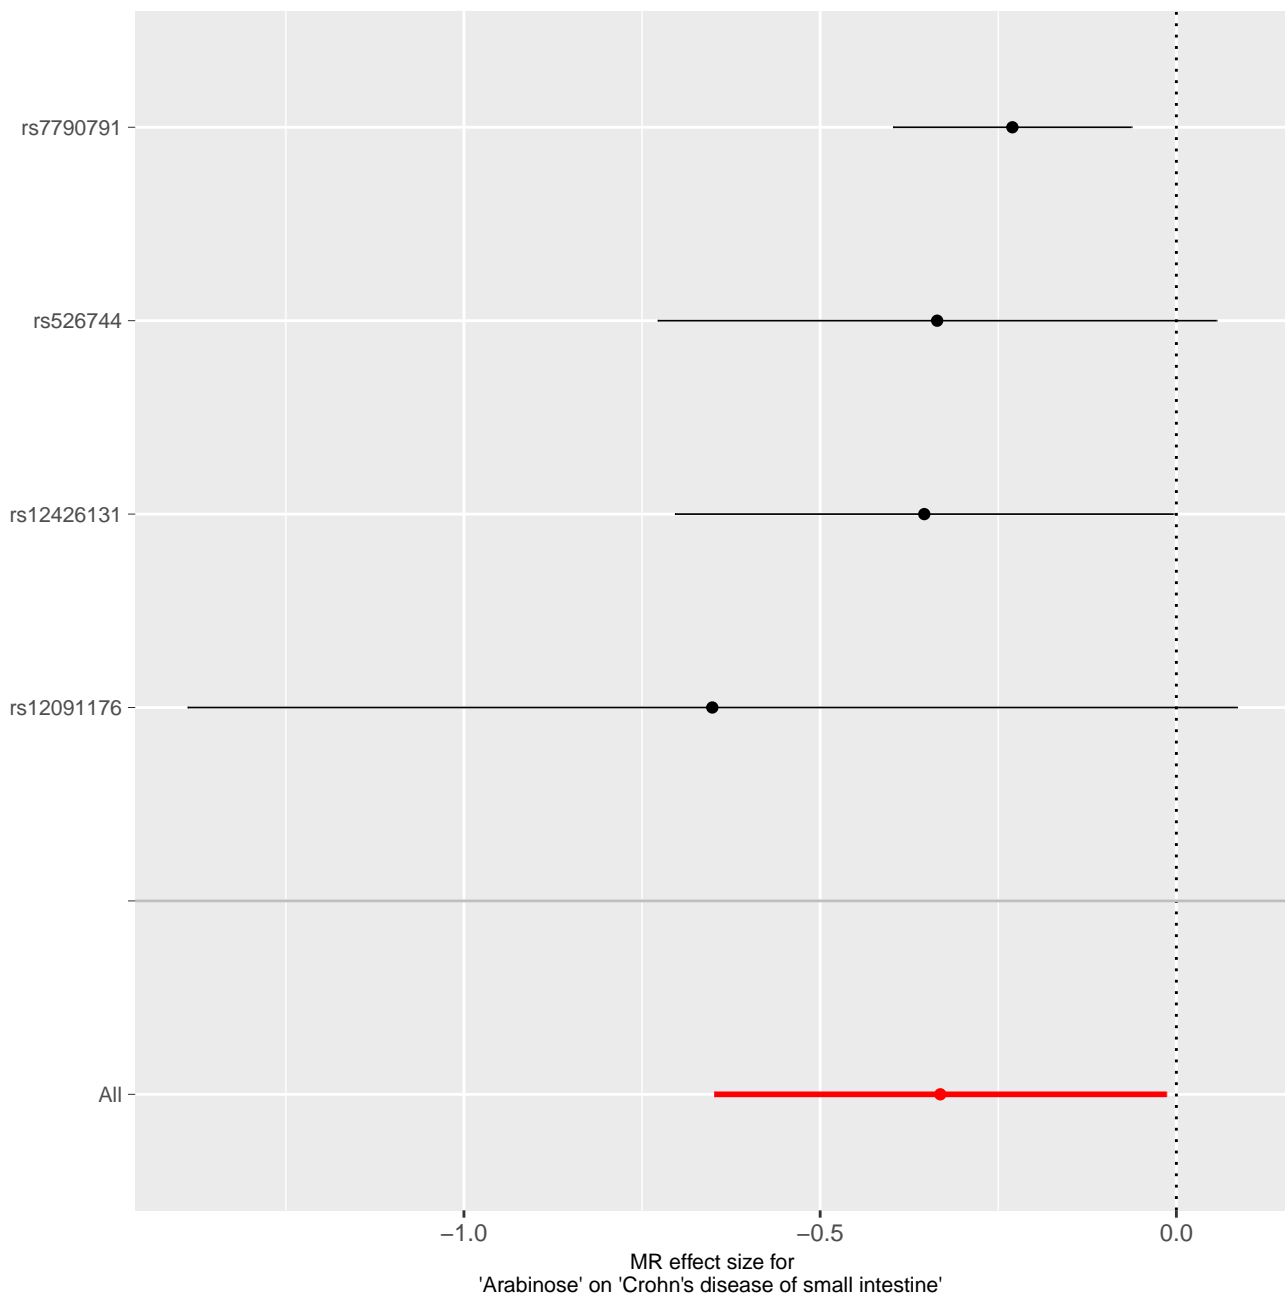

rs661454

rs4663119

rs2456584

All

-1

0

1

2

3

MR effect size for  
'Fructose' on 'Crohn's disease of small intestine'

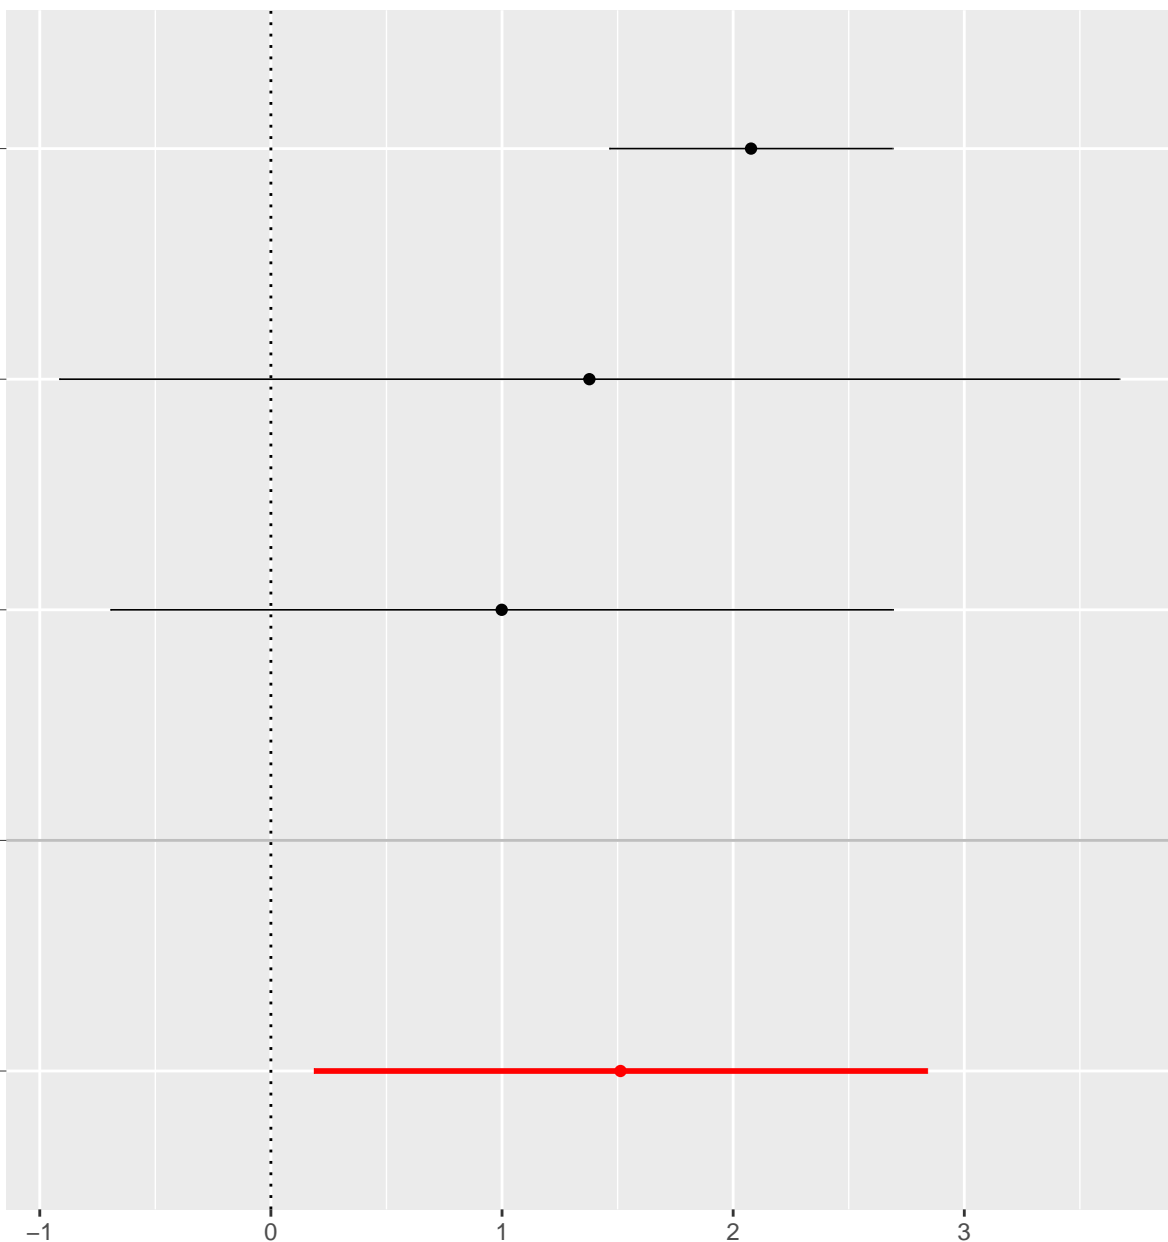

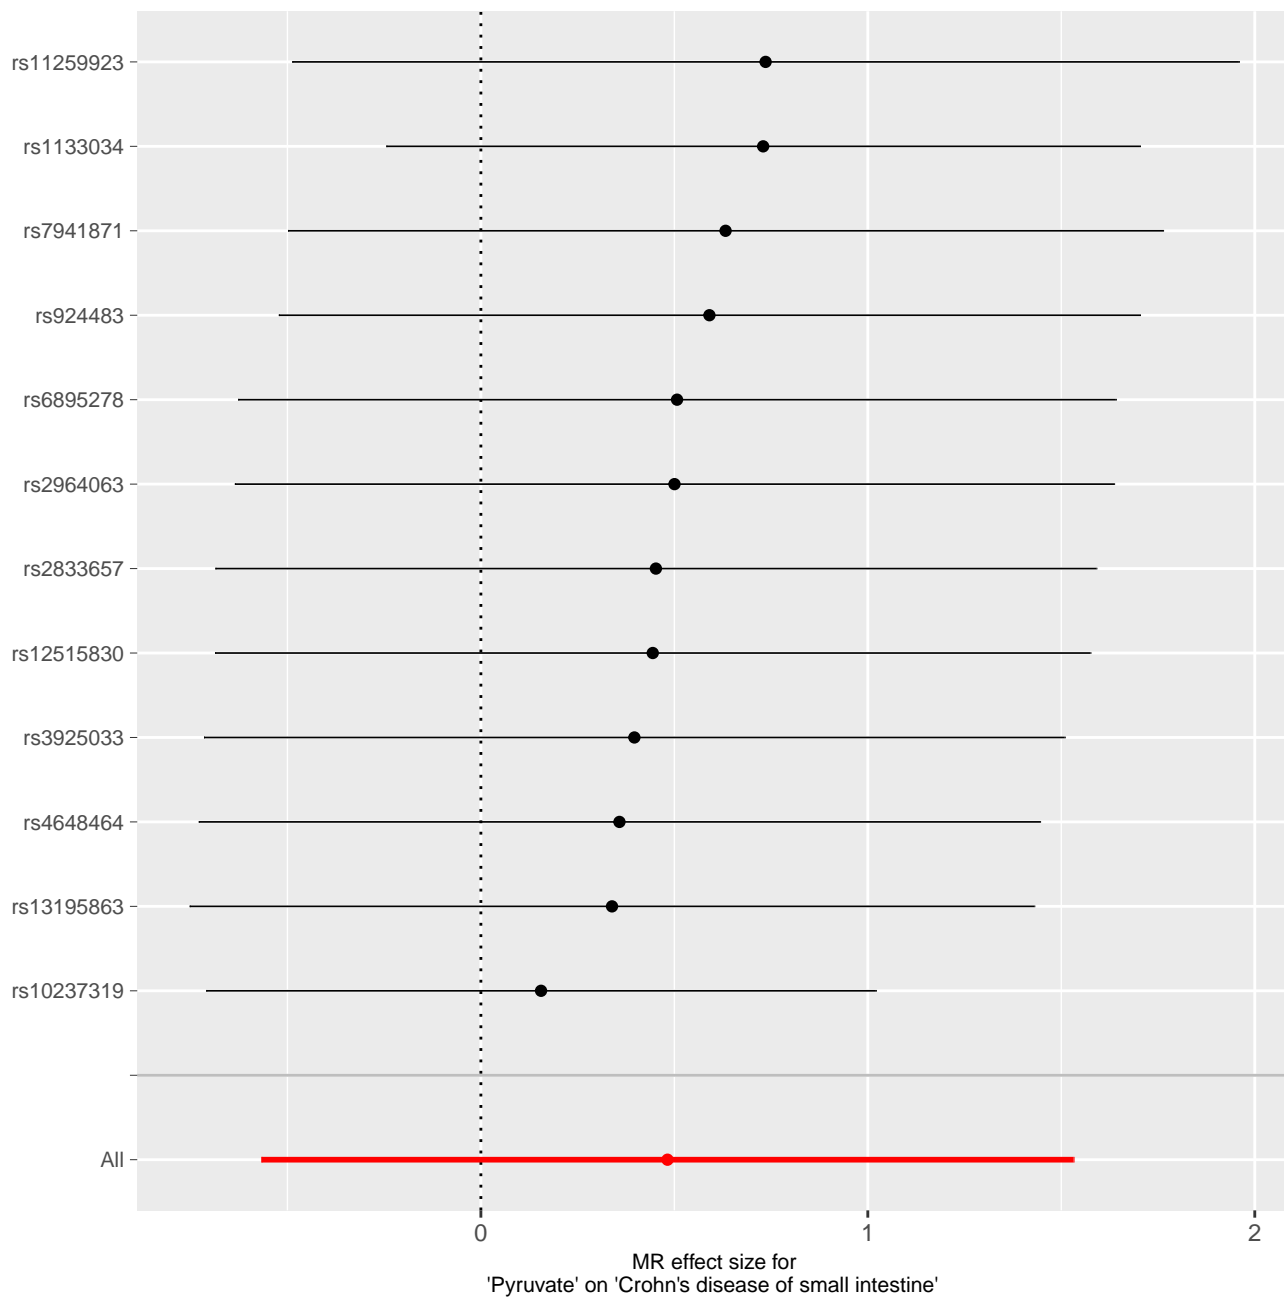

Batch 565 : Linoleate (18:2n6) on Crohn's disease of small intestine

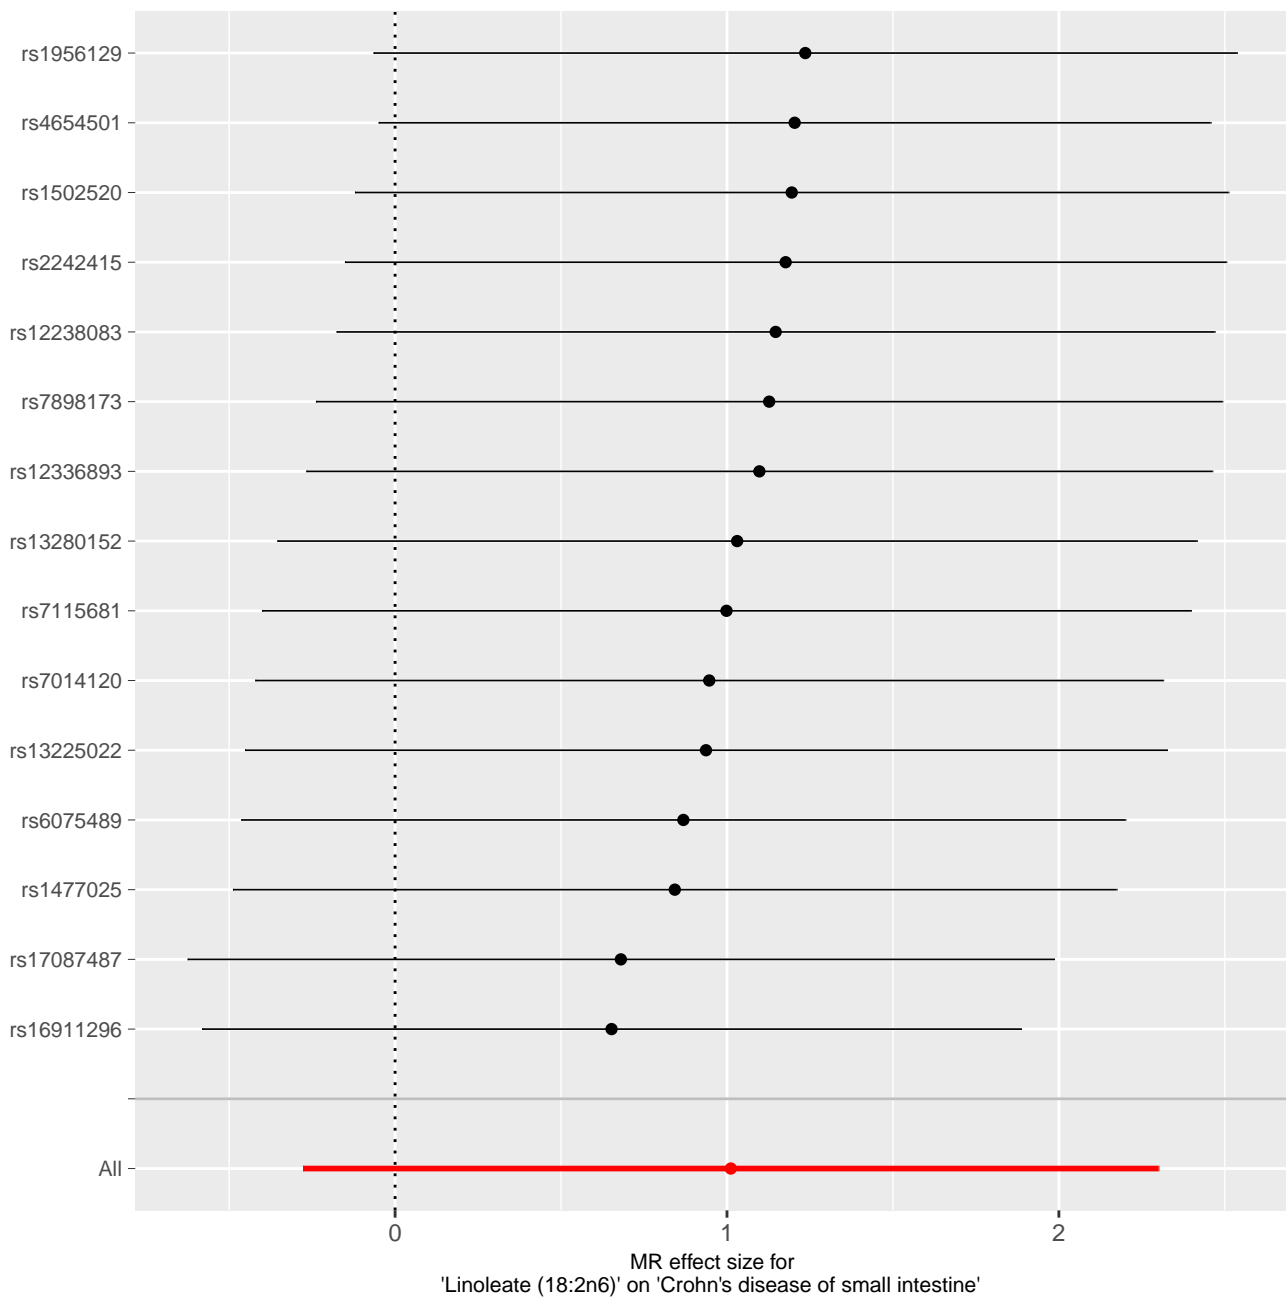

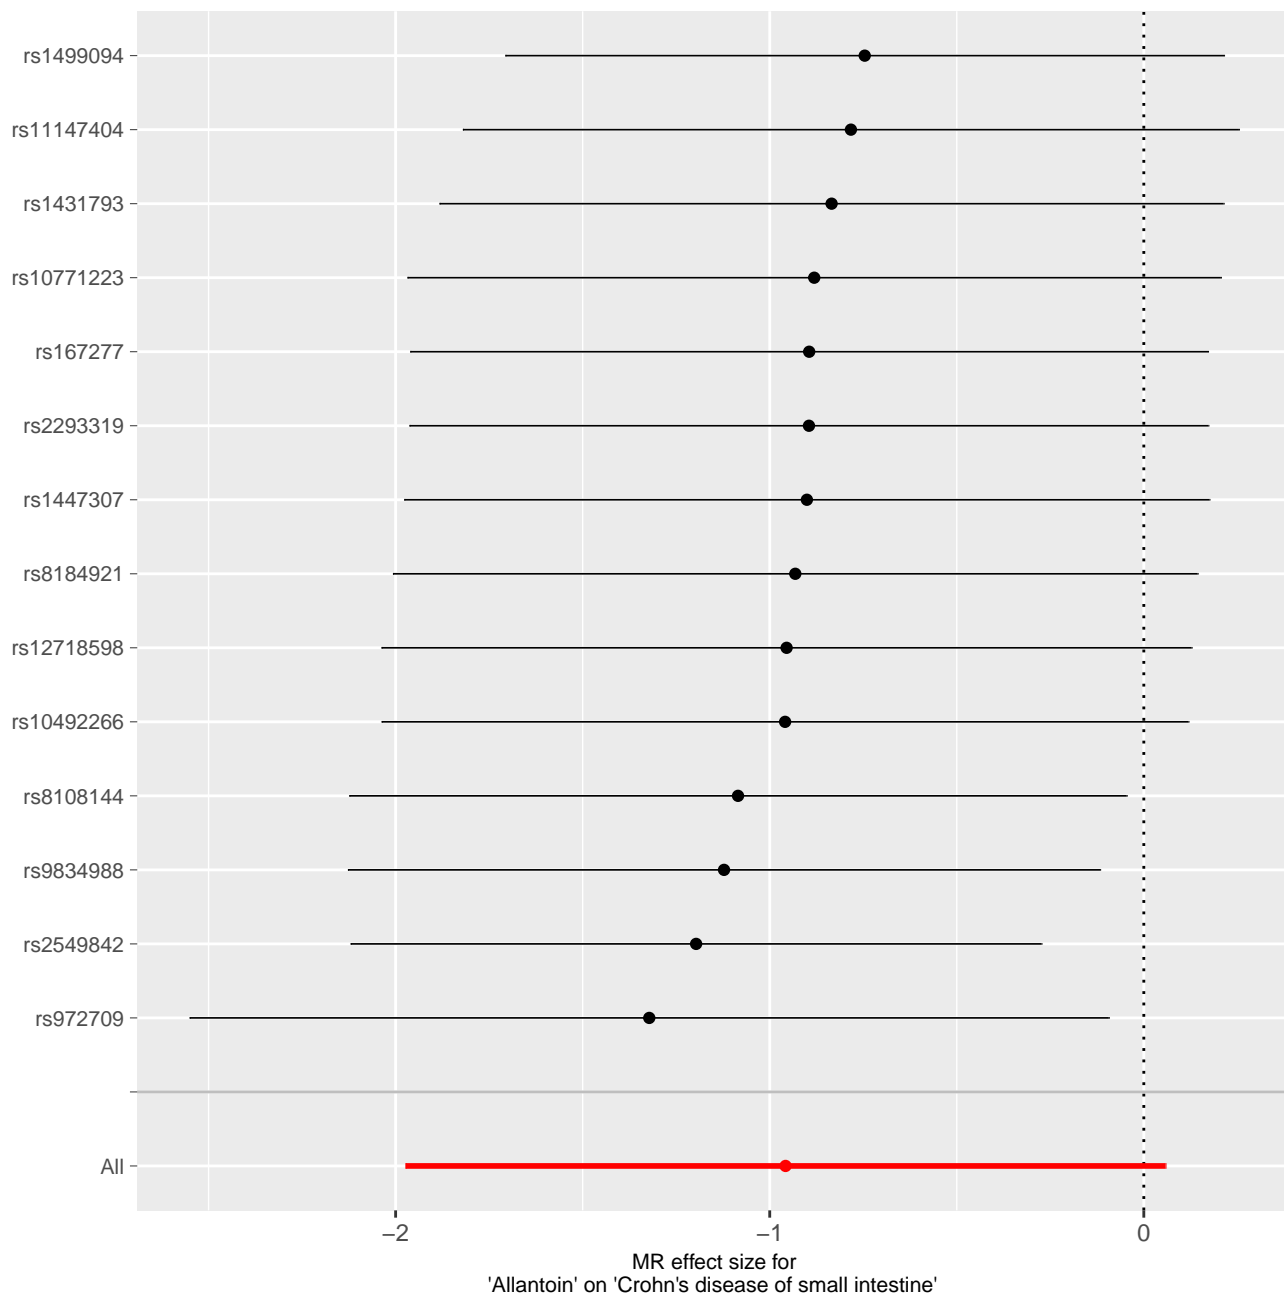

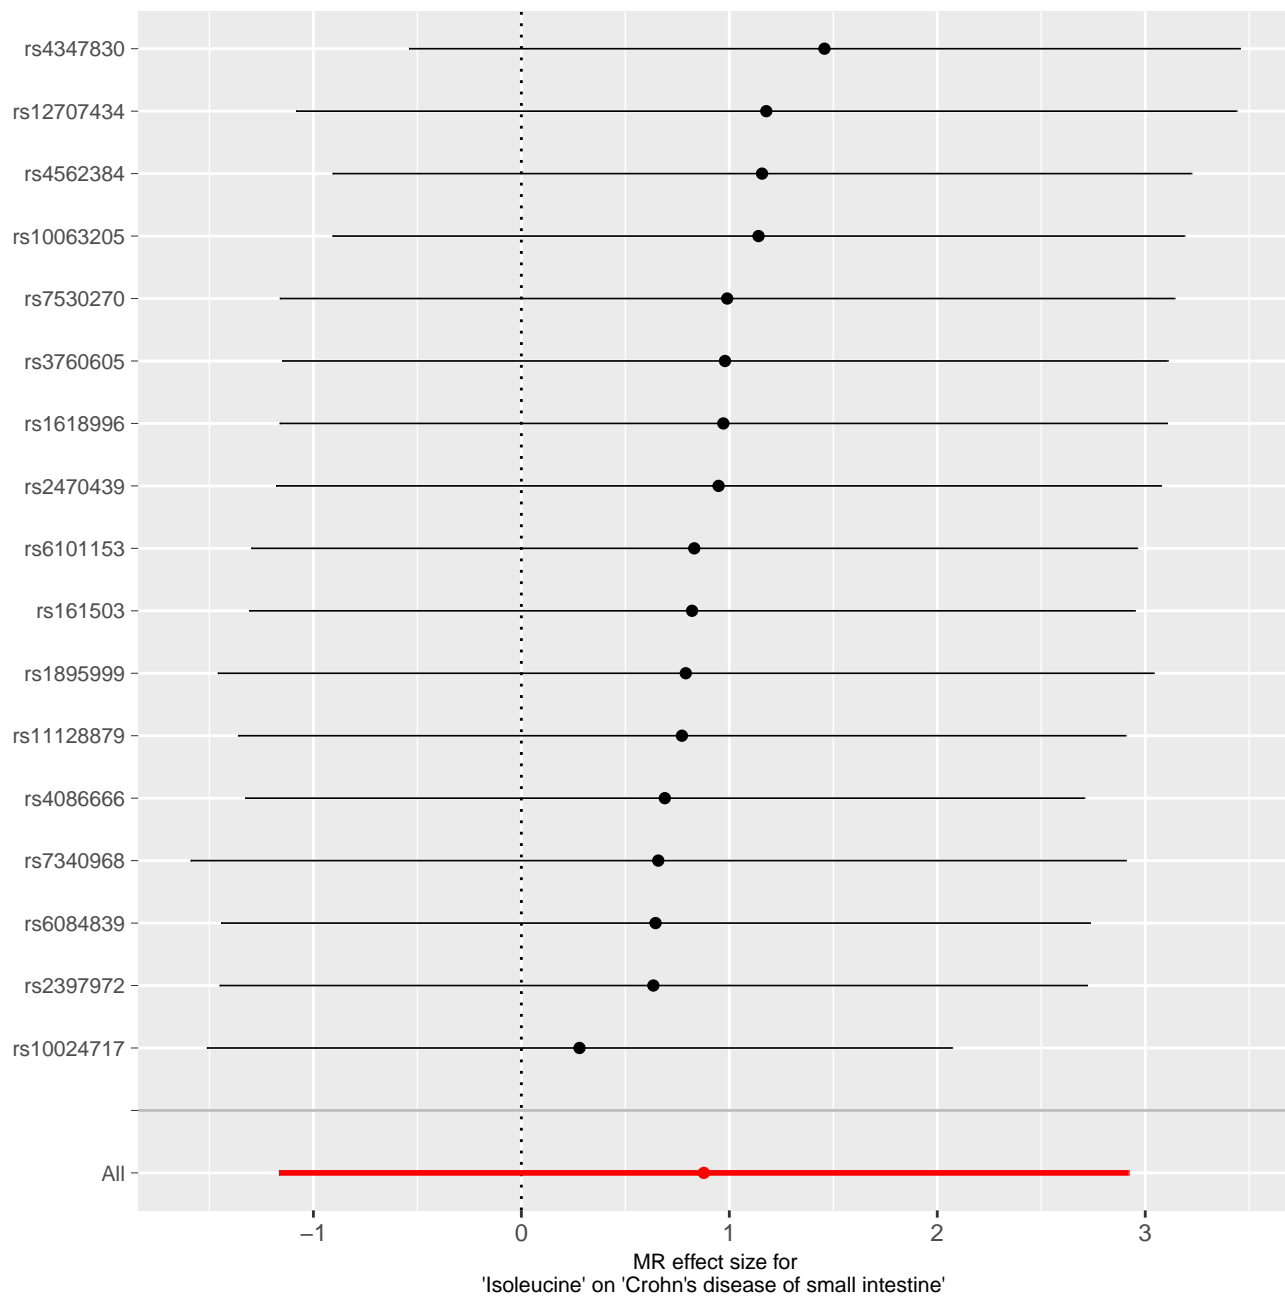

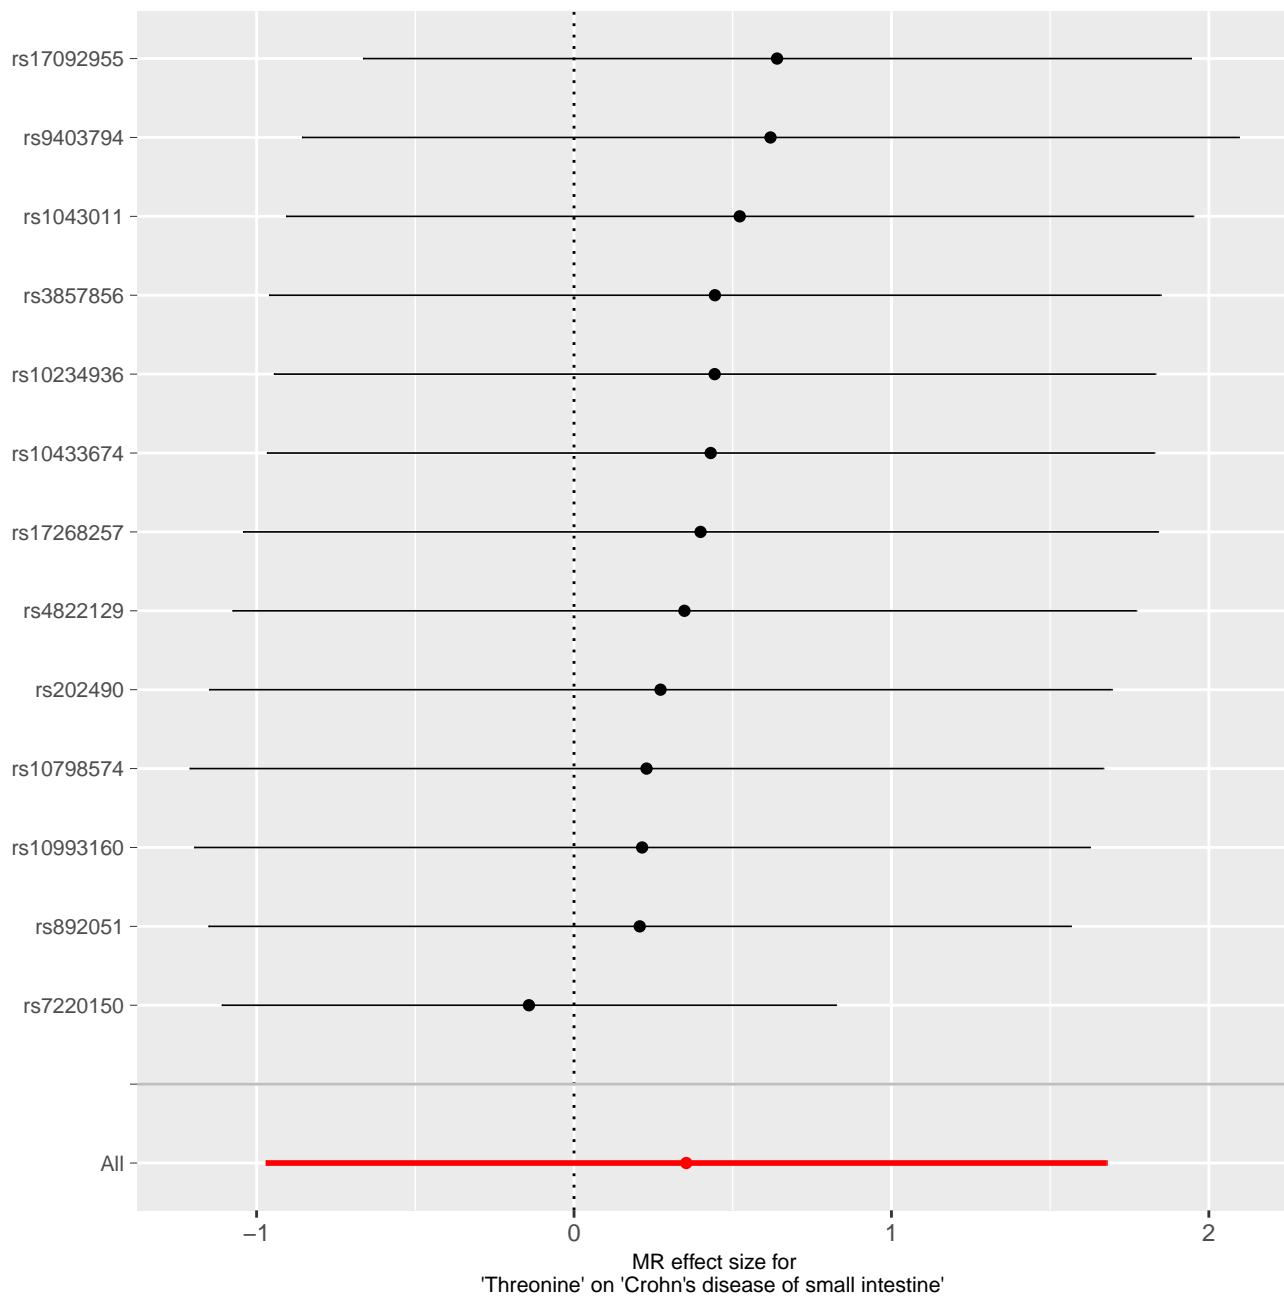

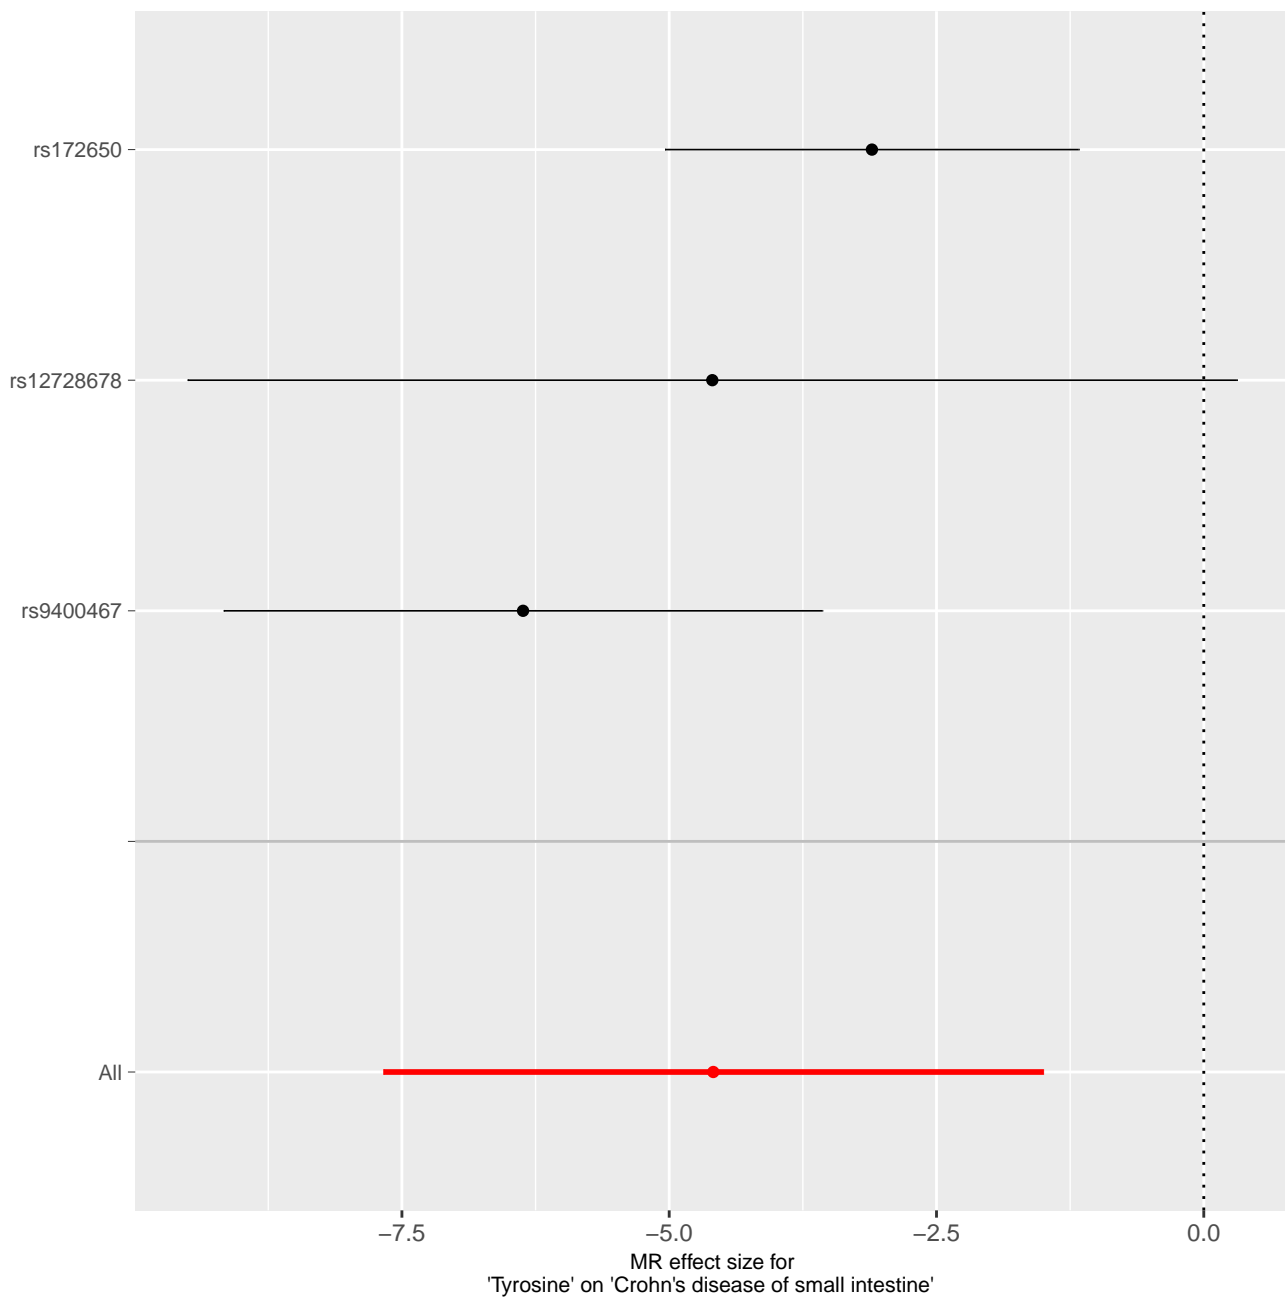



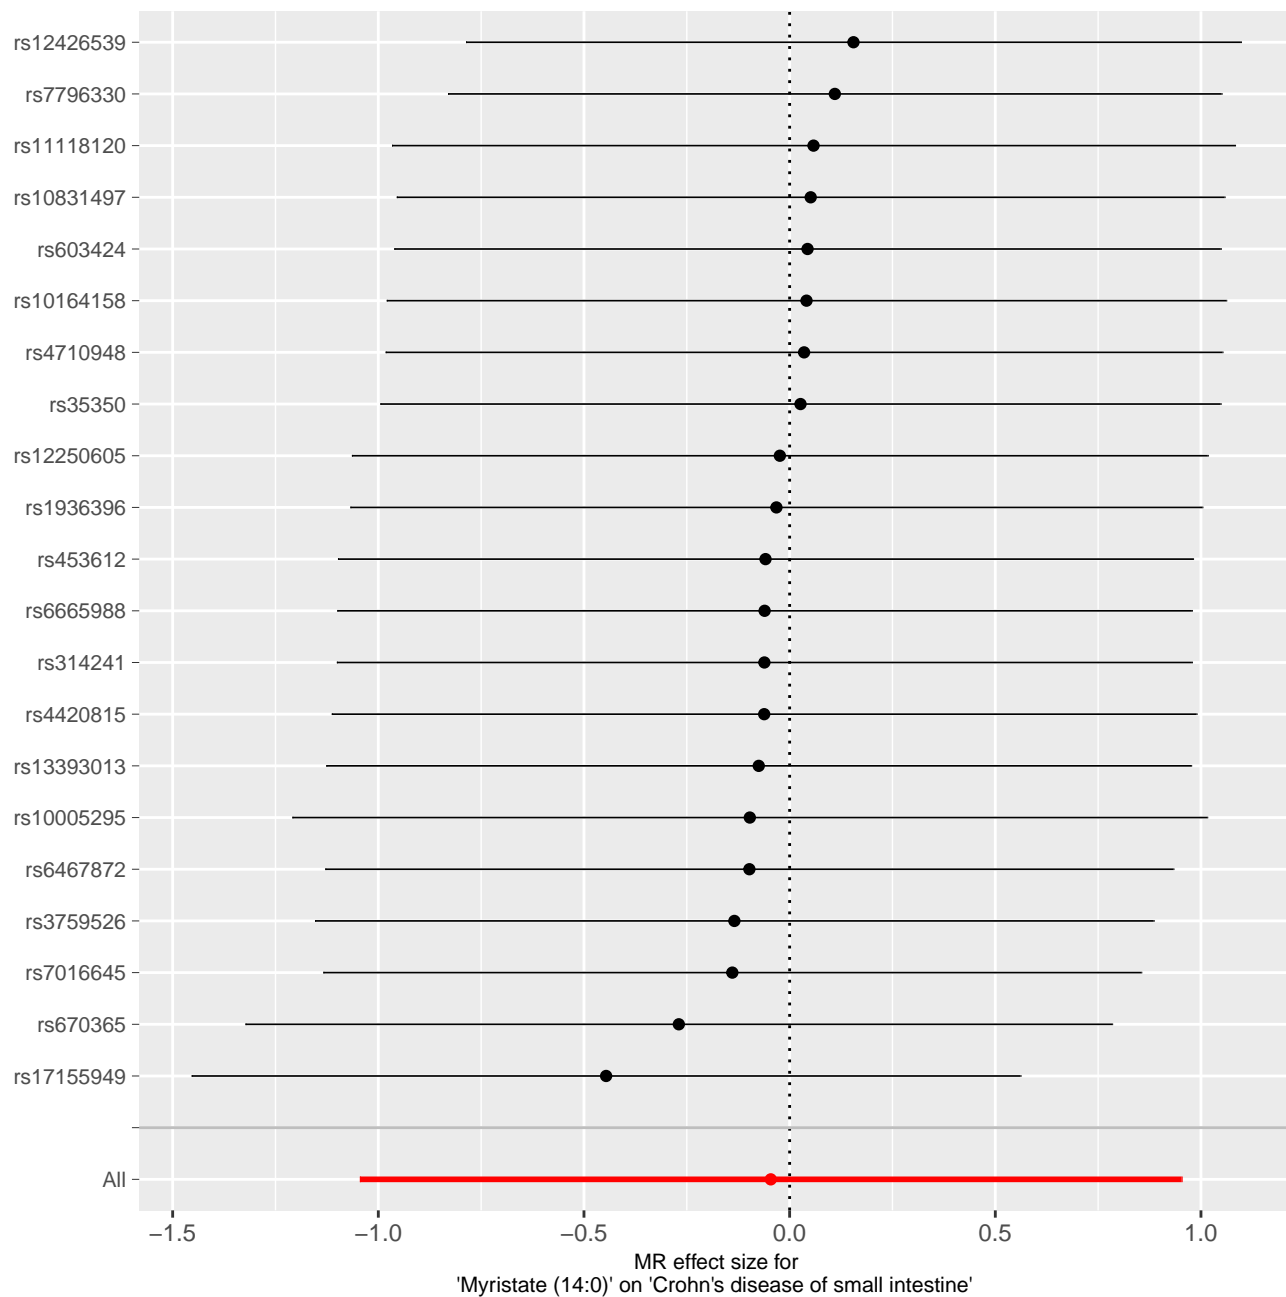

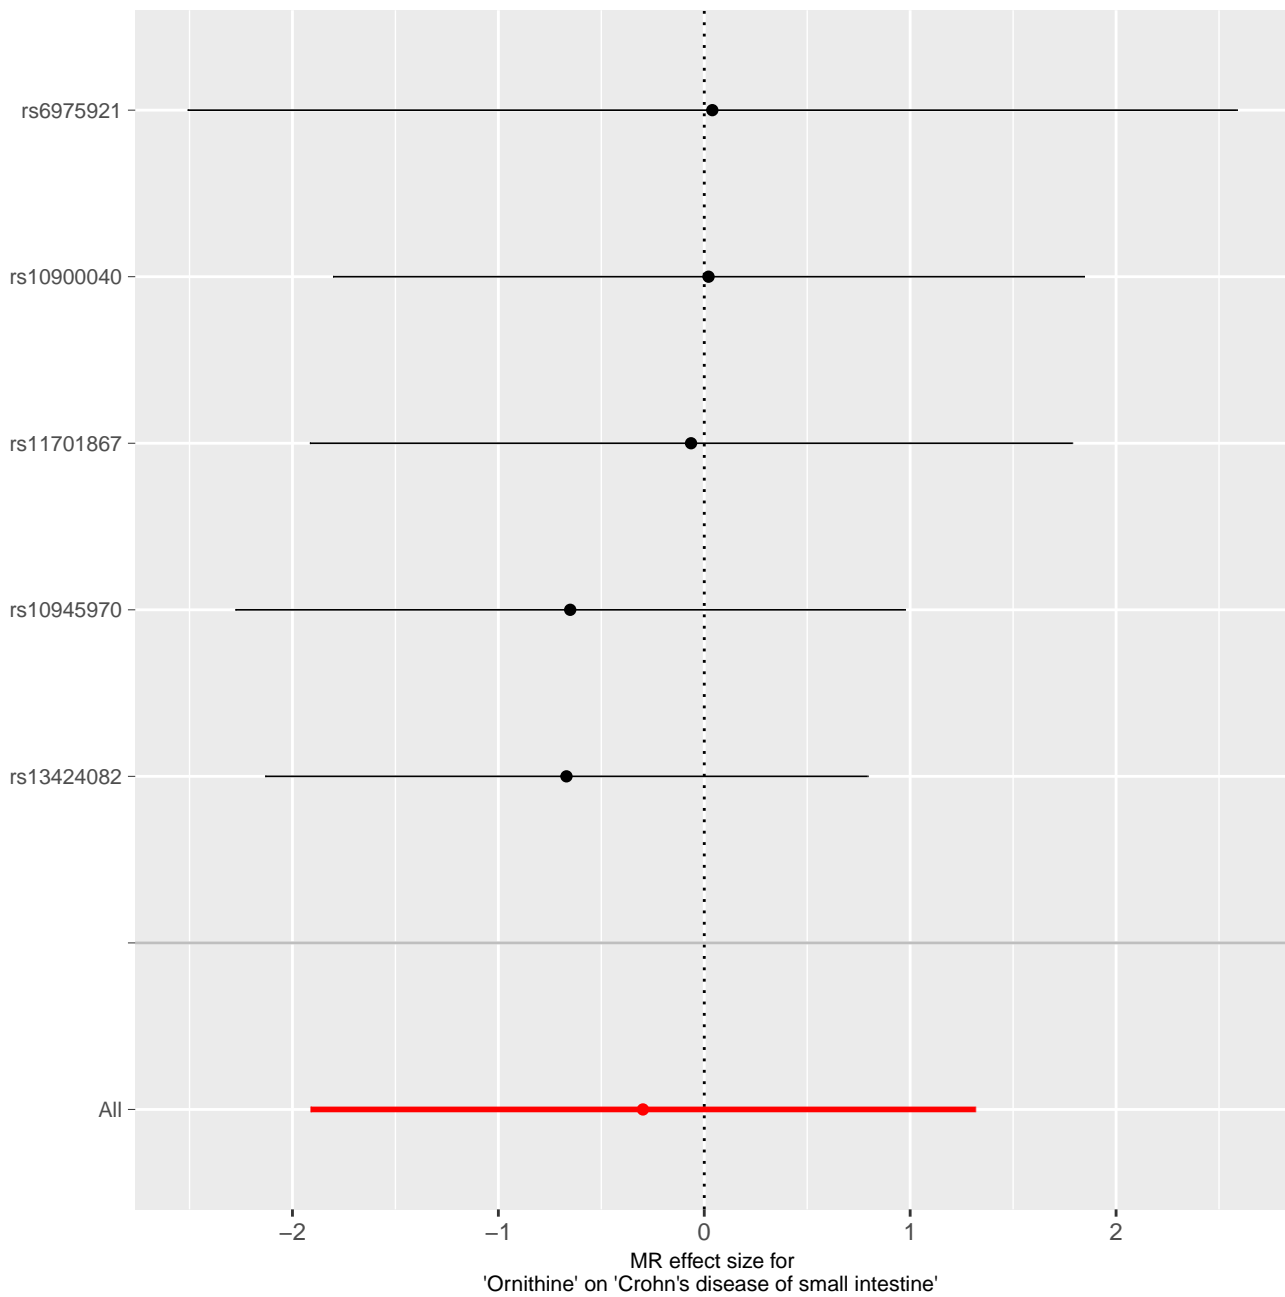

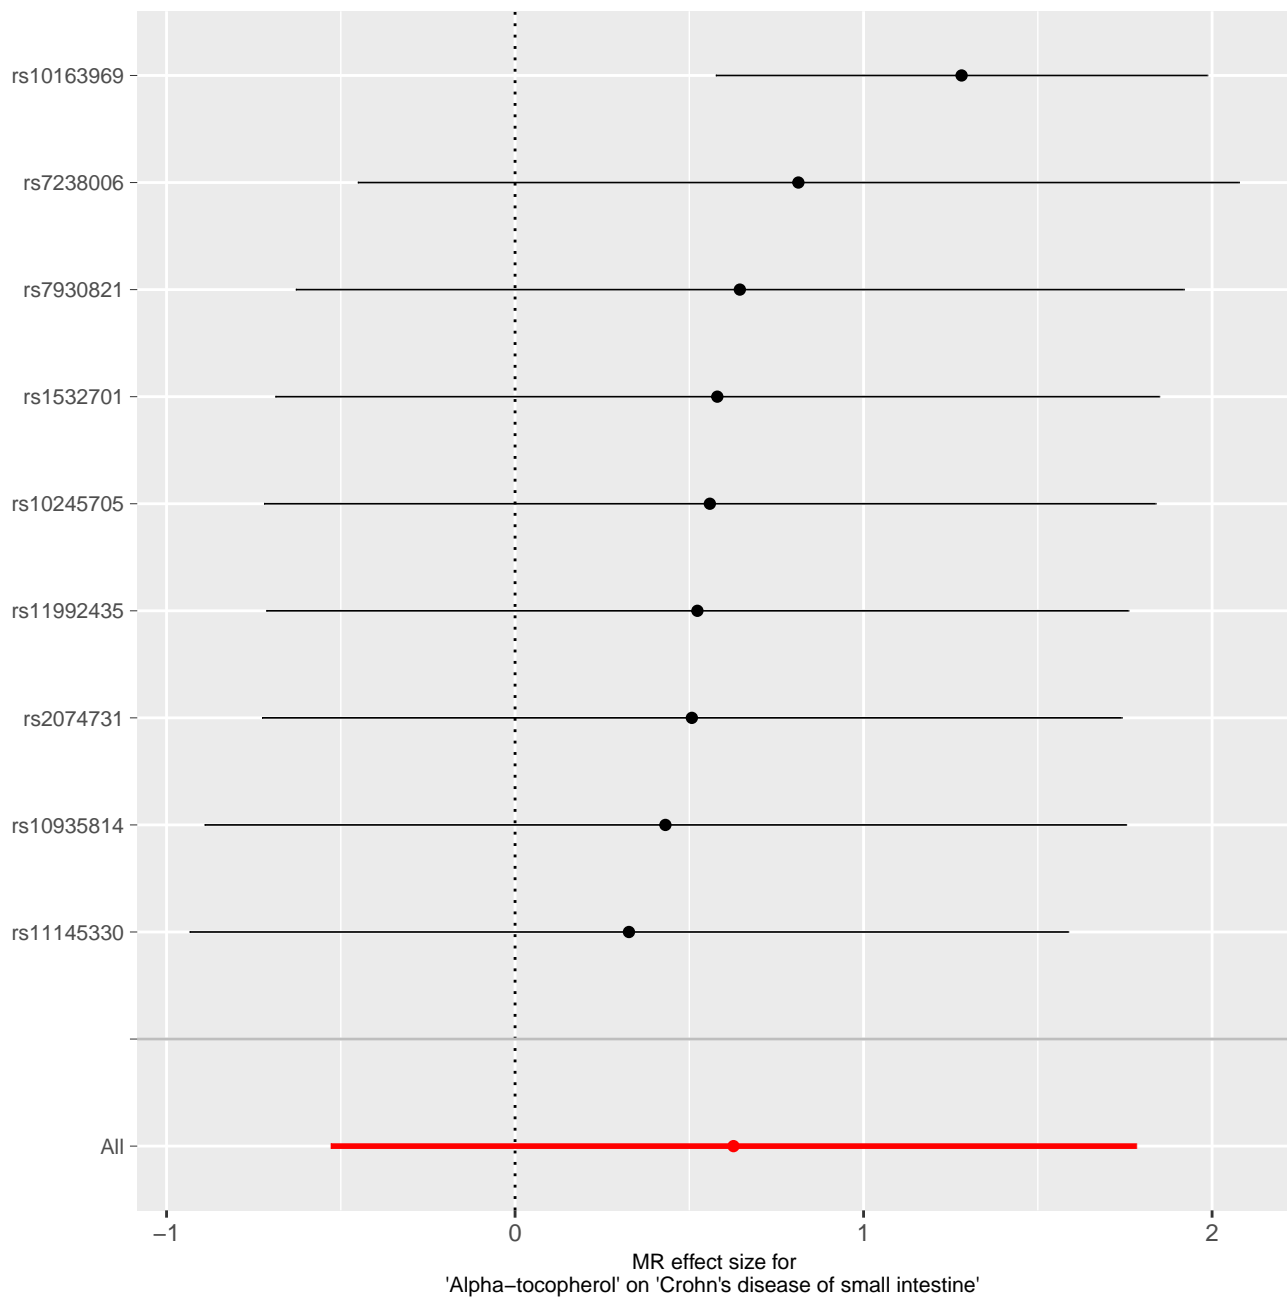

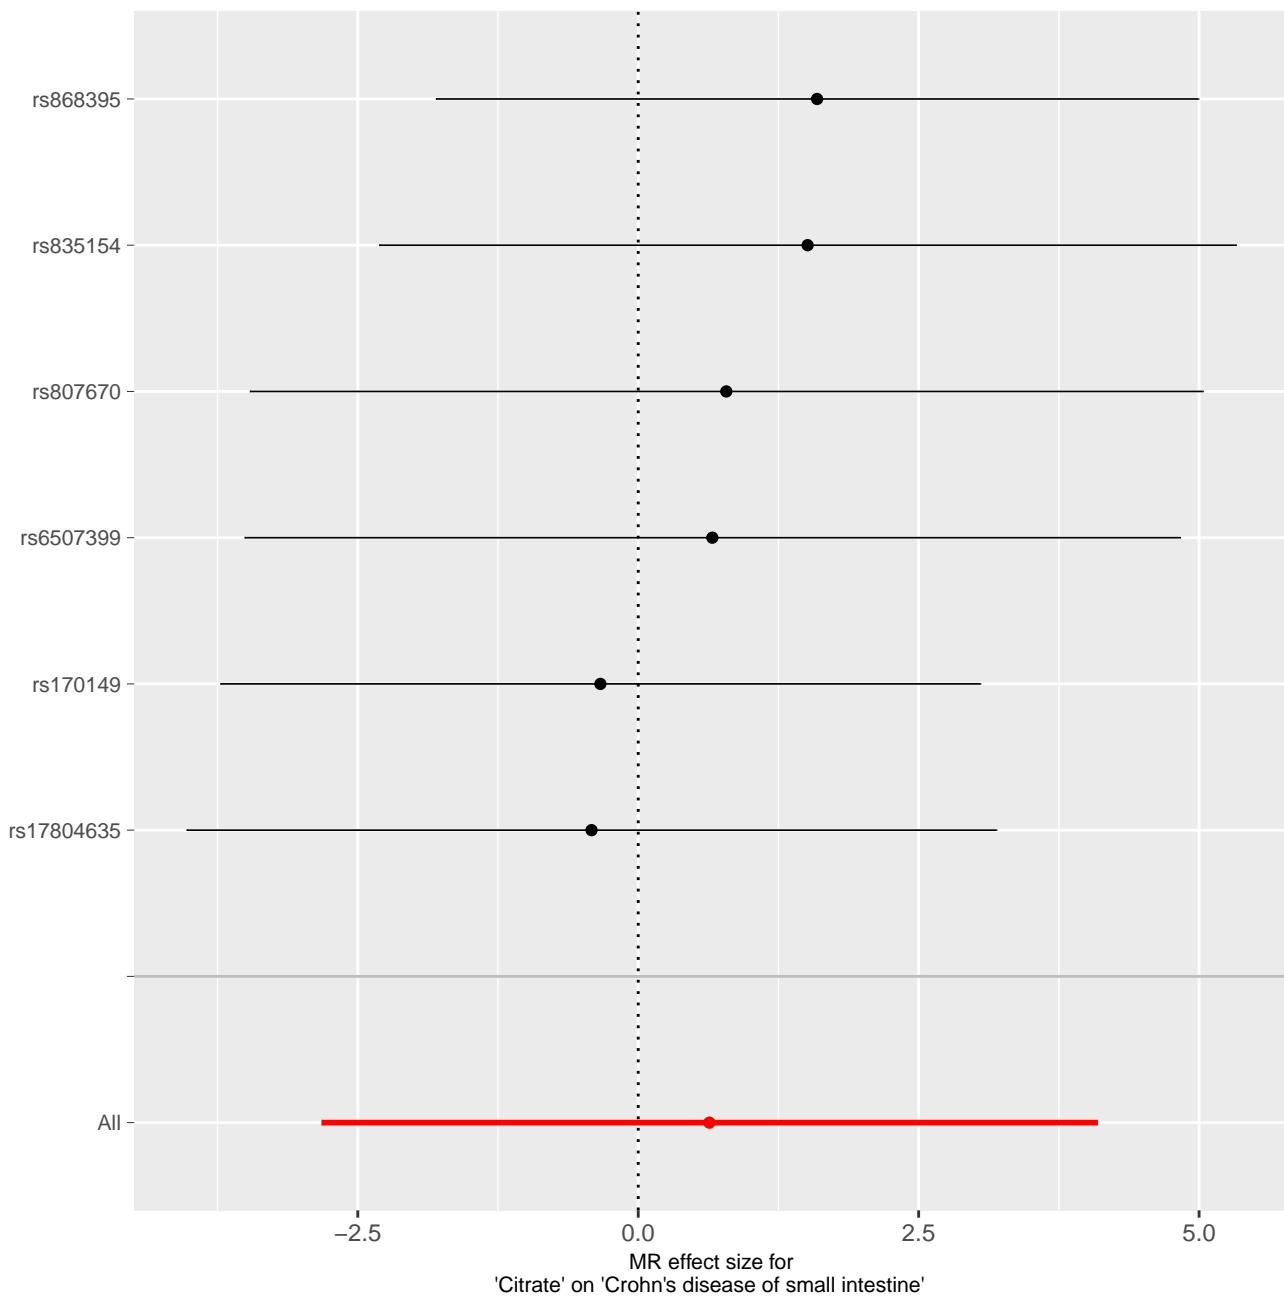

Batch 590 : Glycerate on Crohn's disease of small intestine

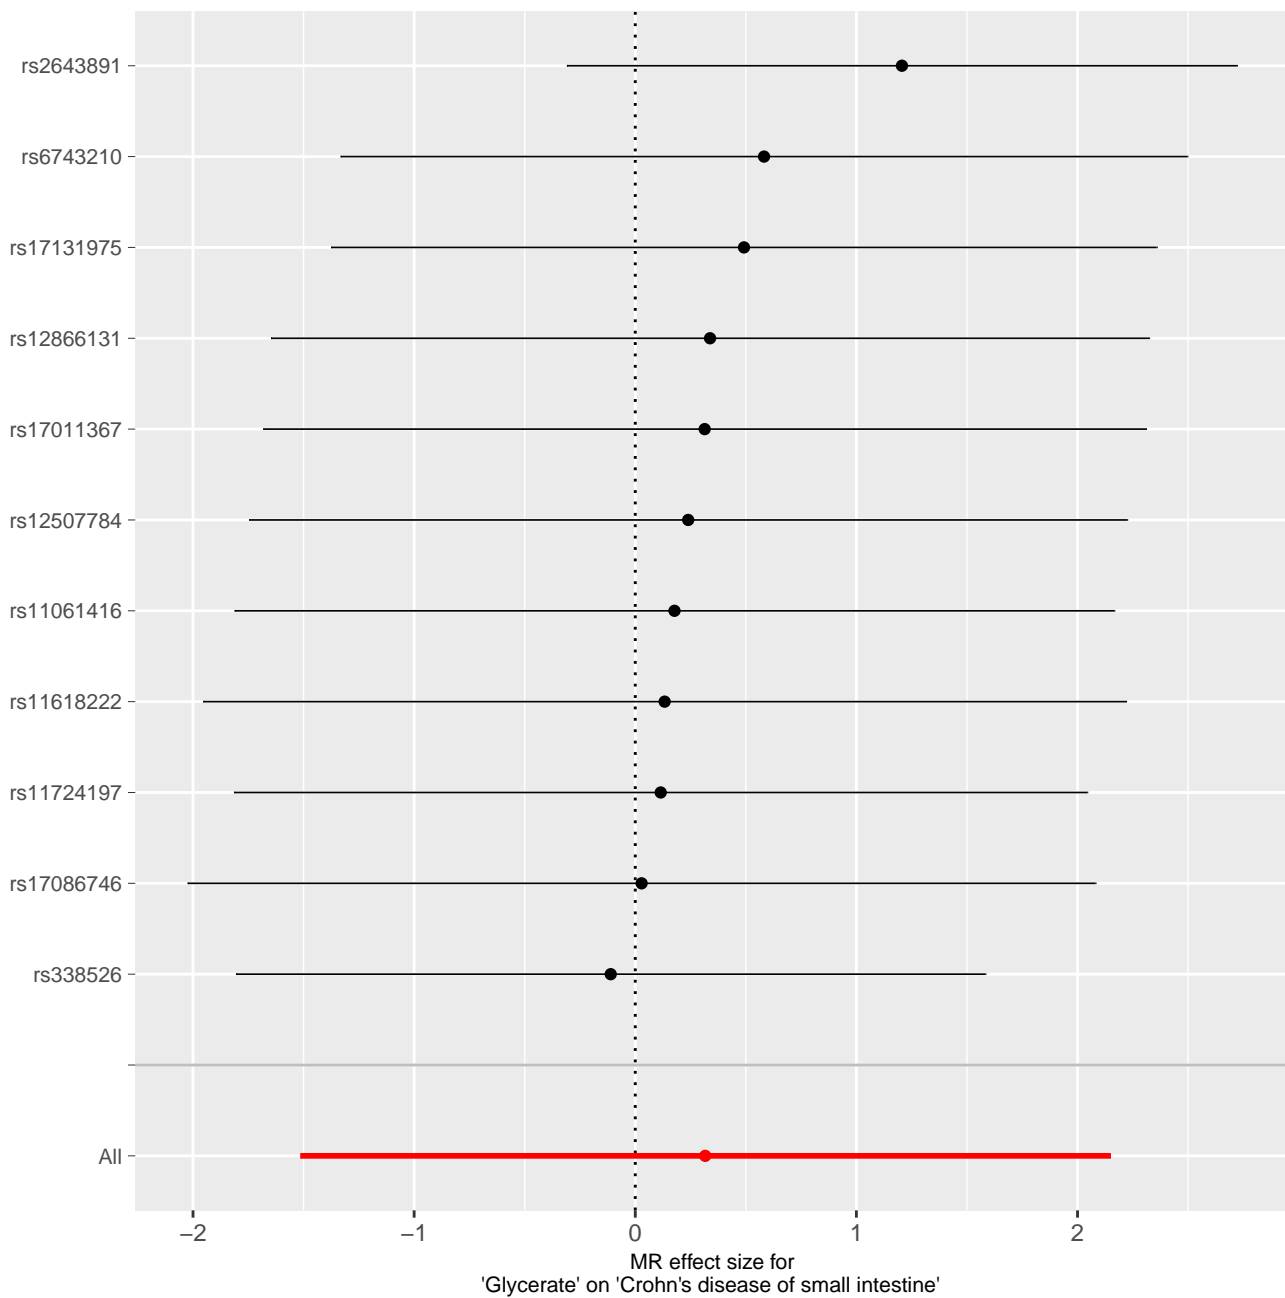

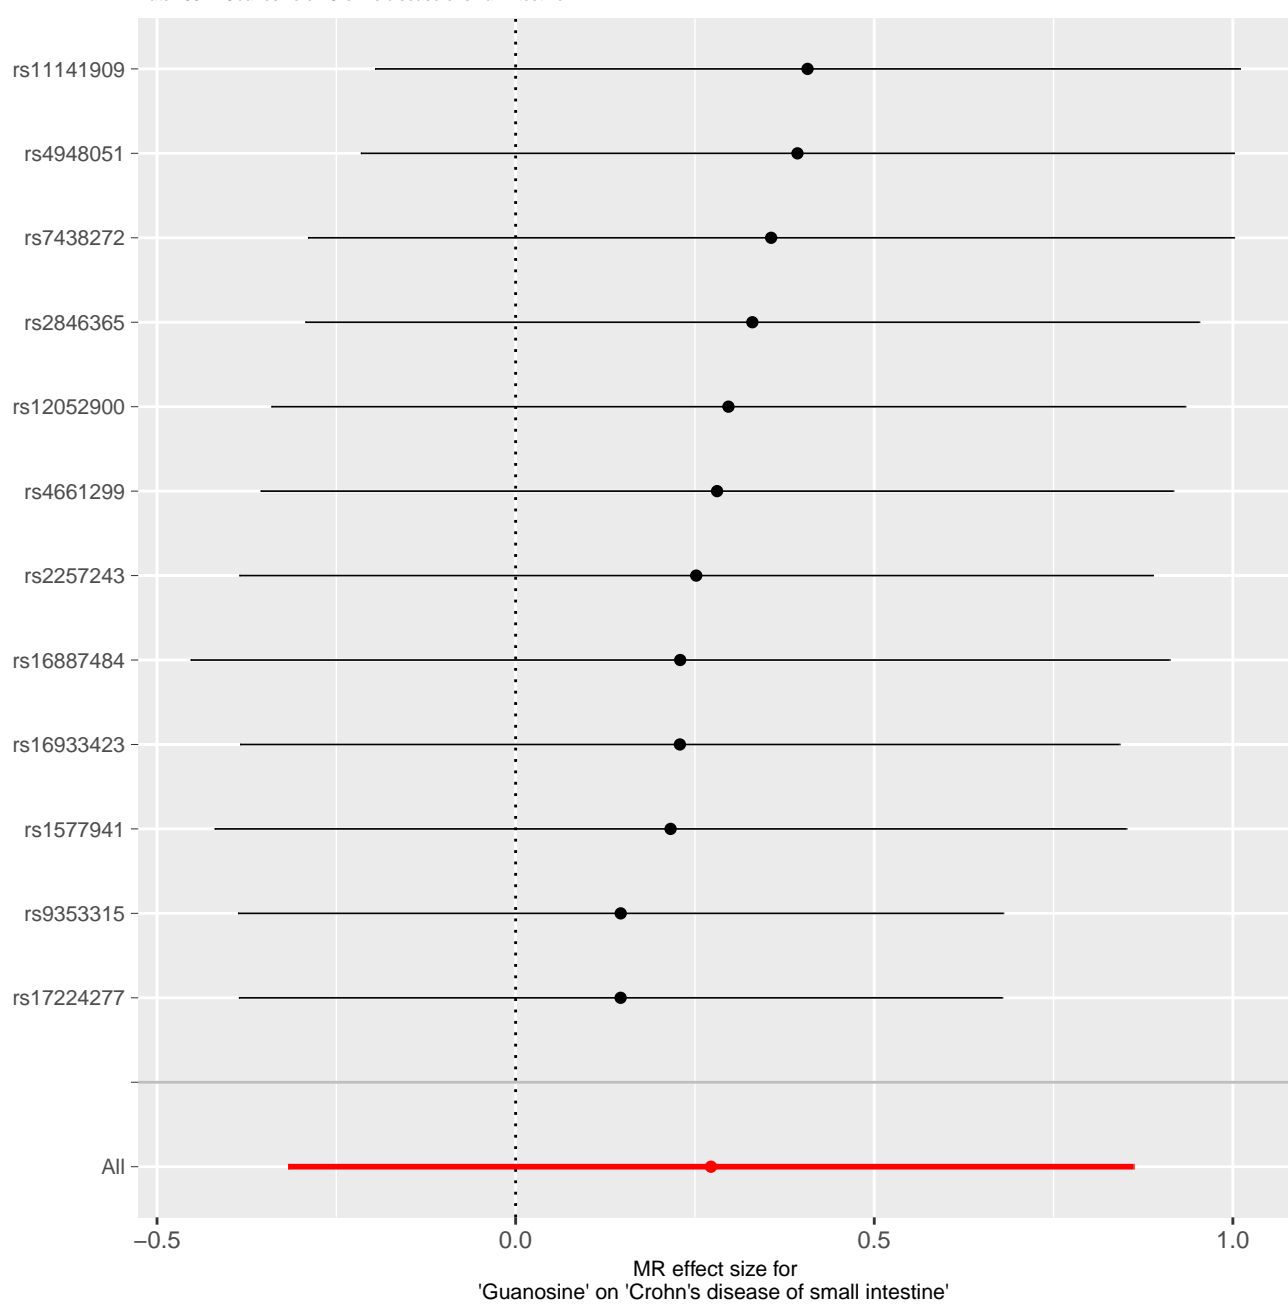

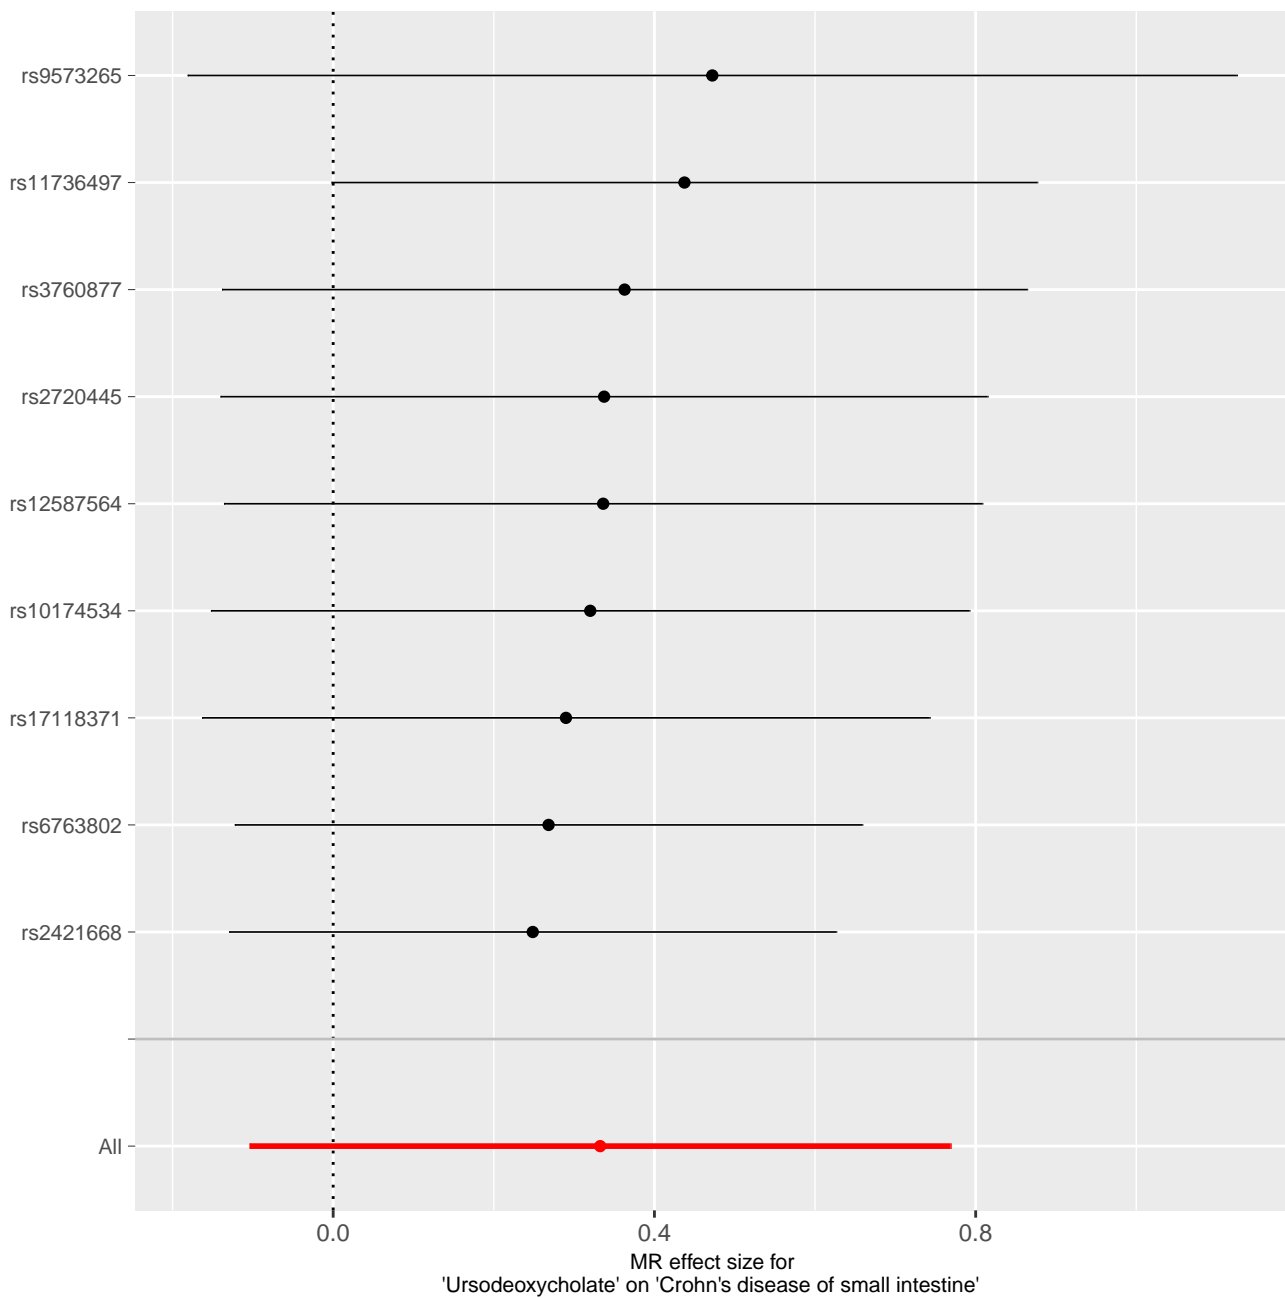

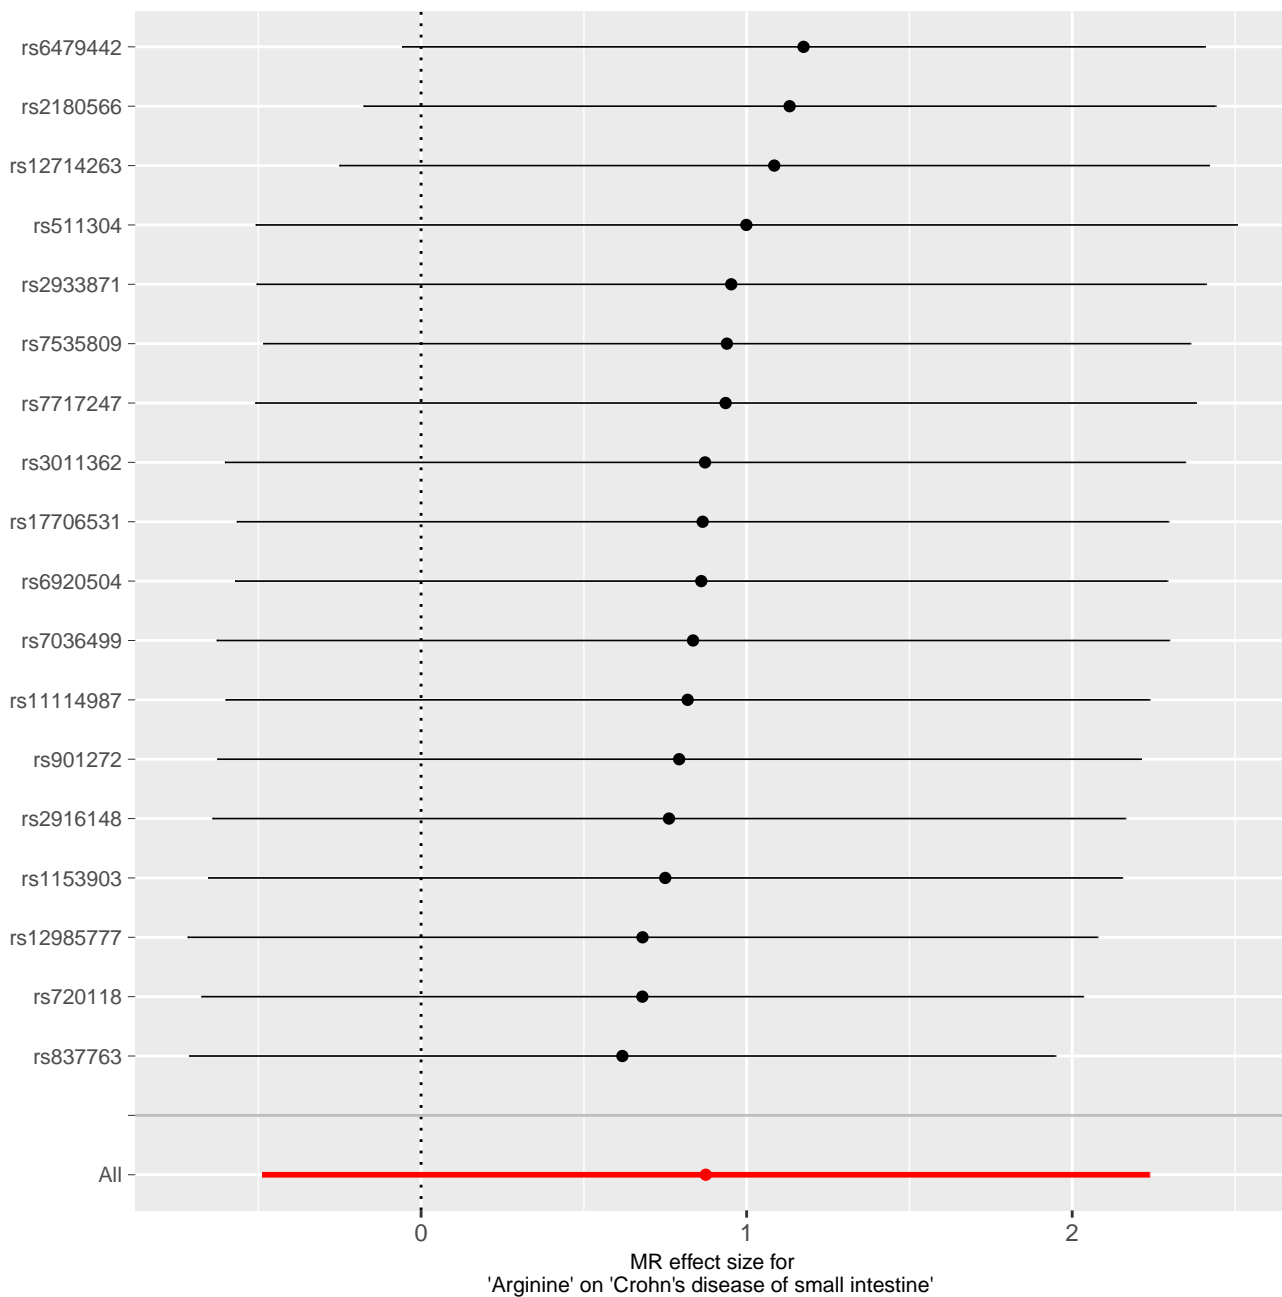



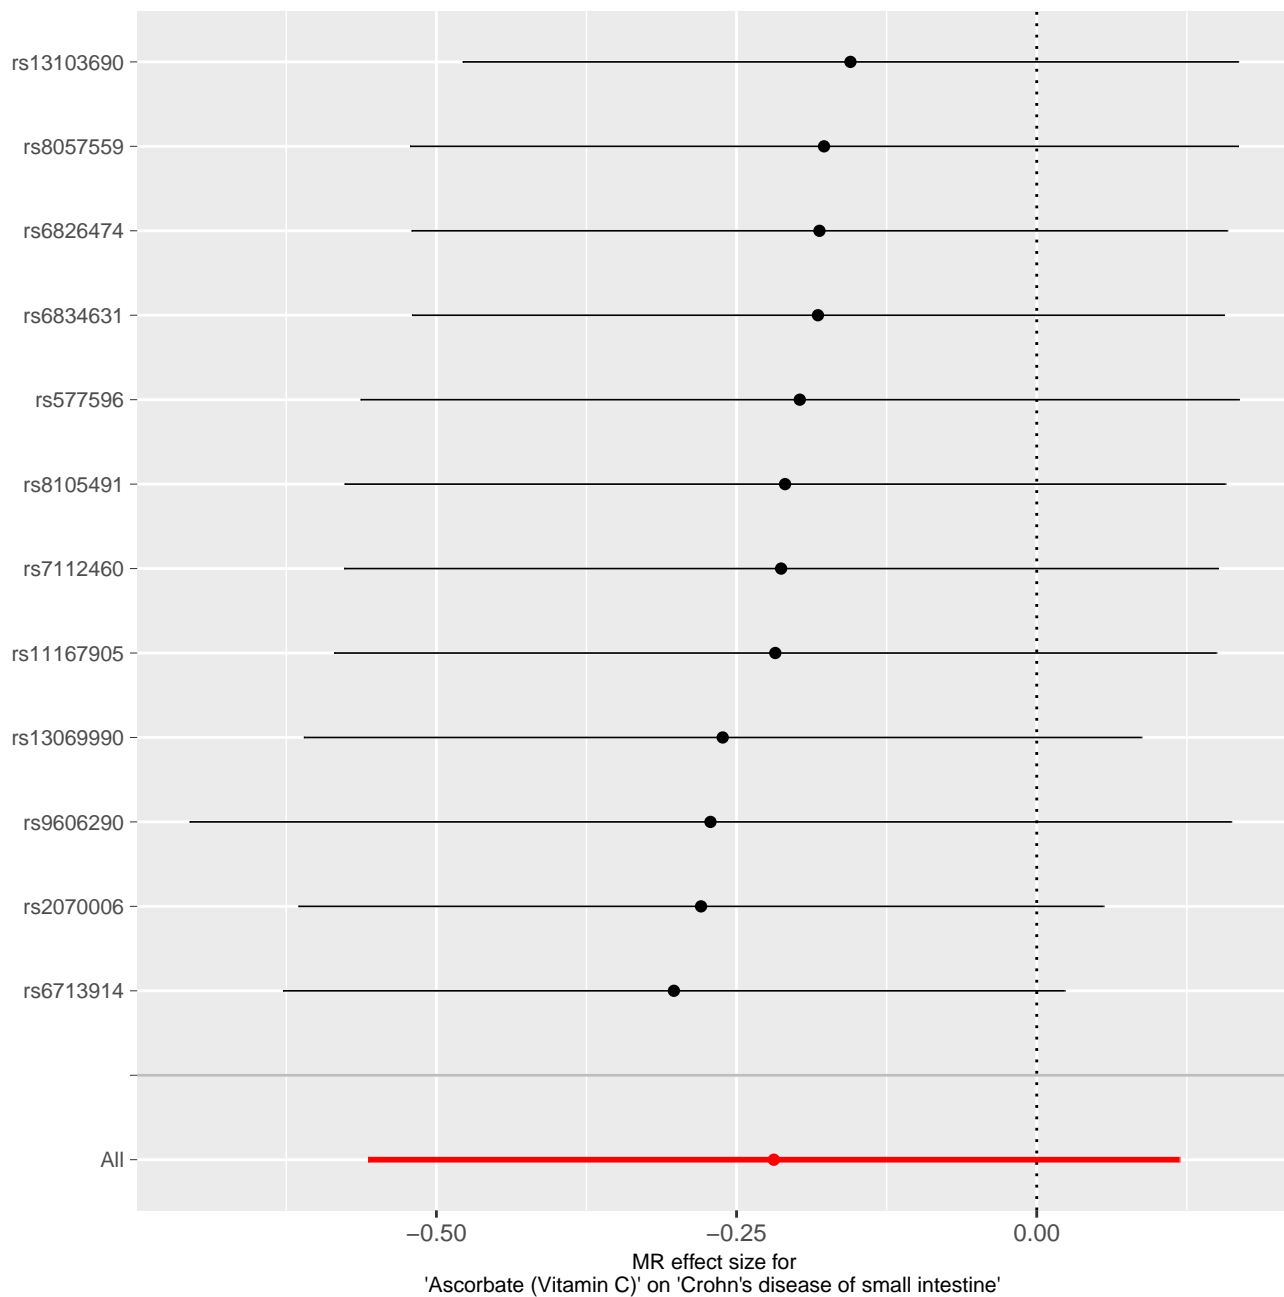

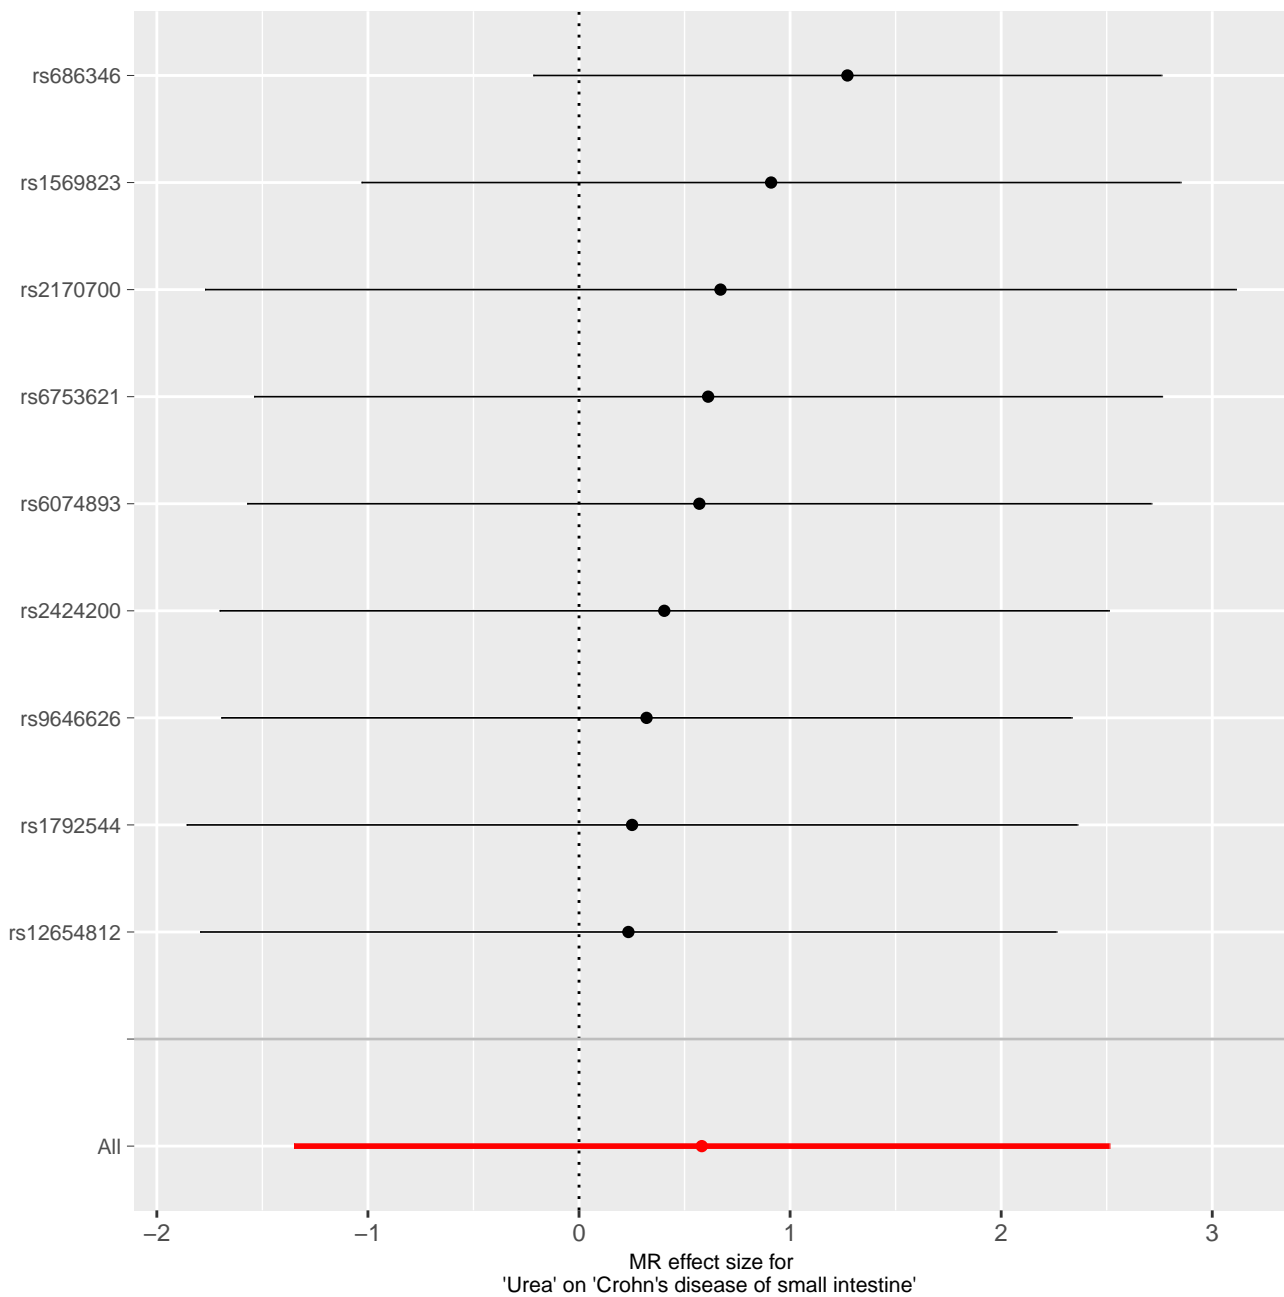

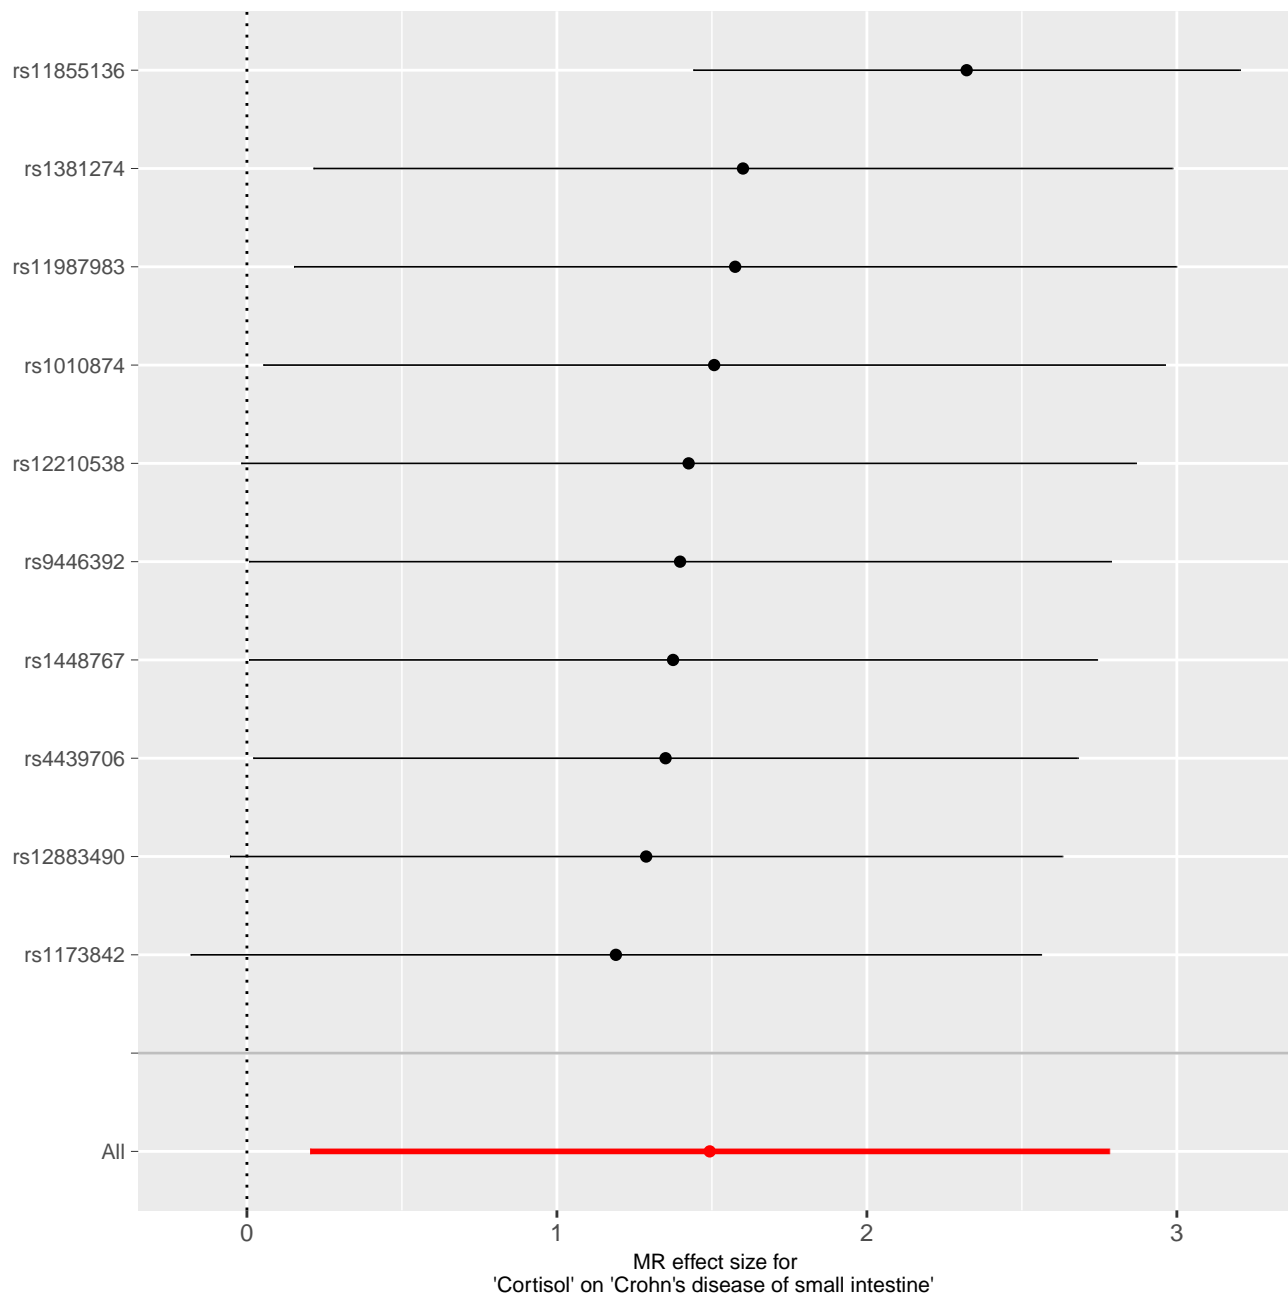

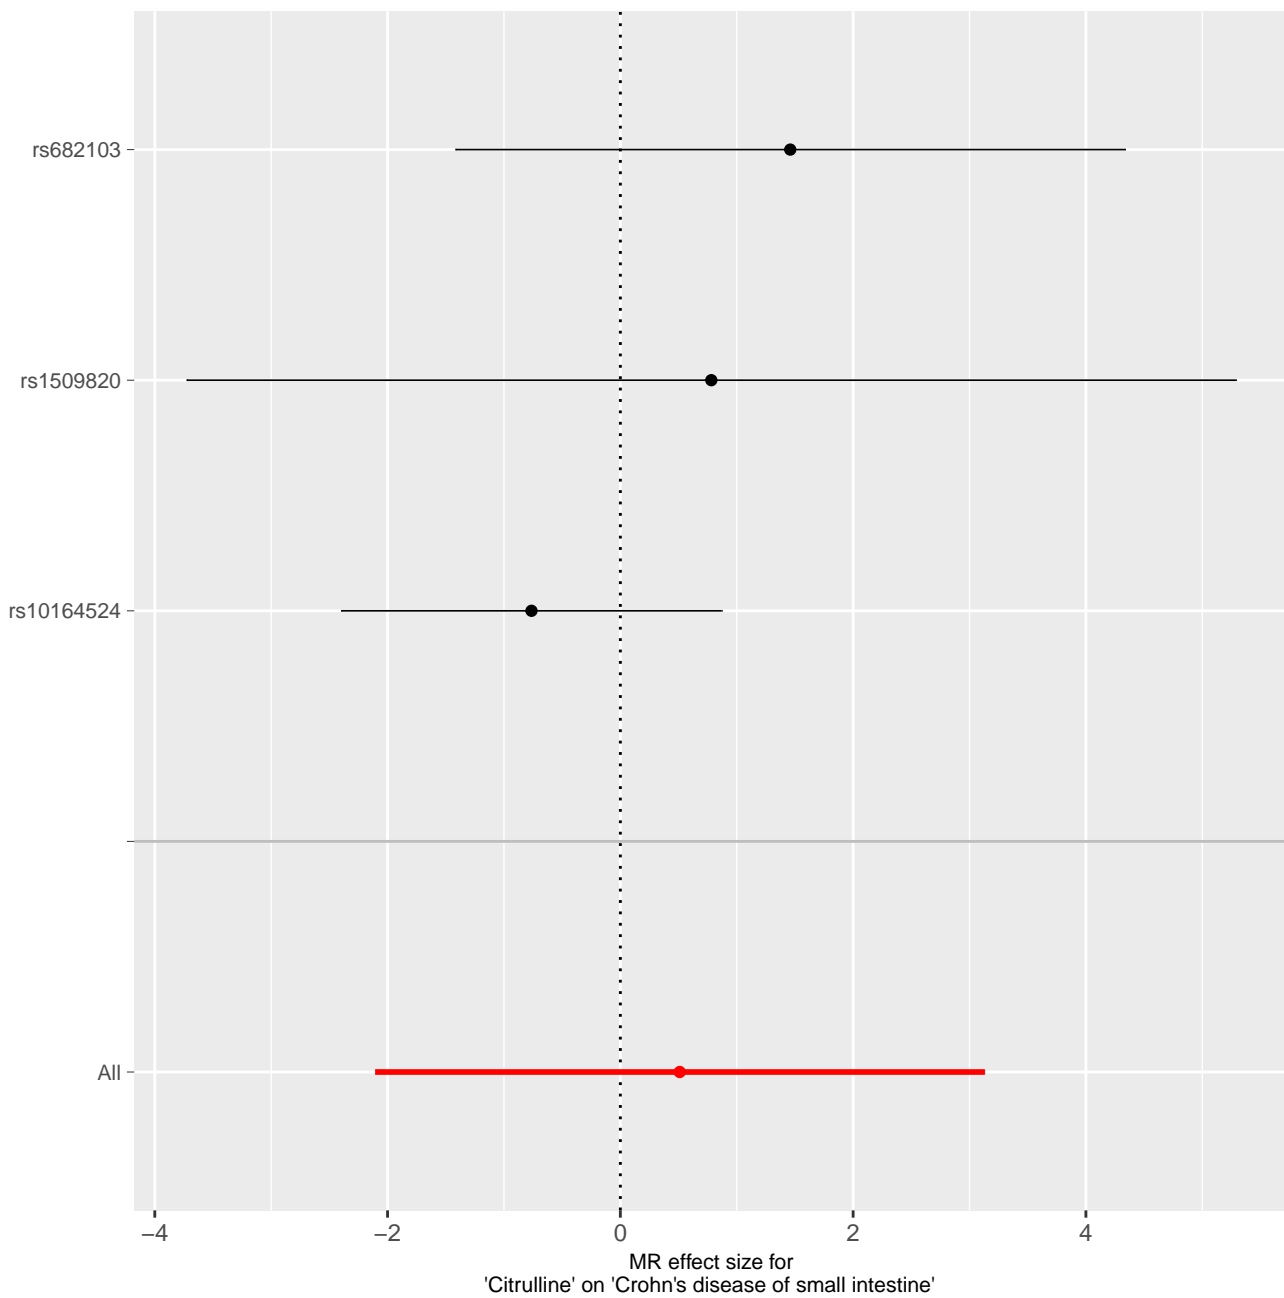

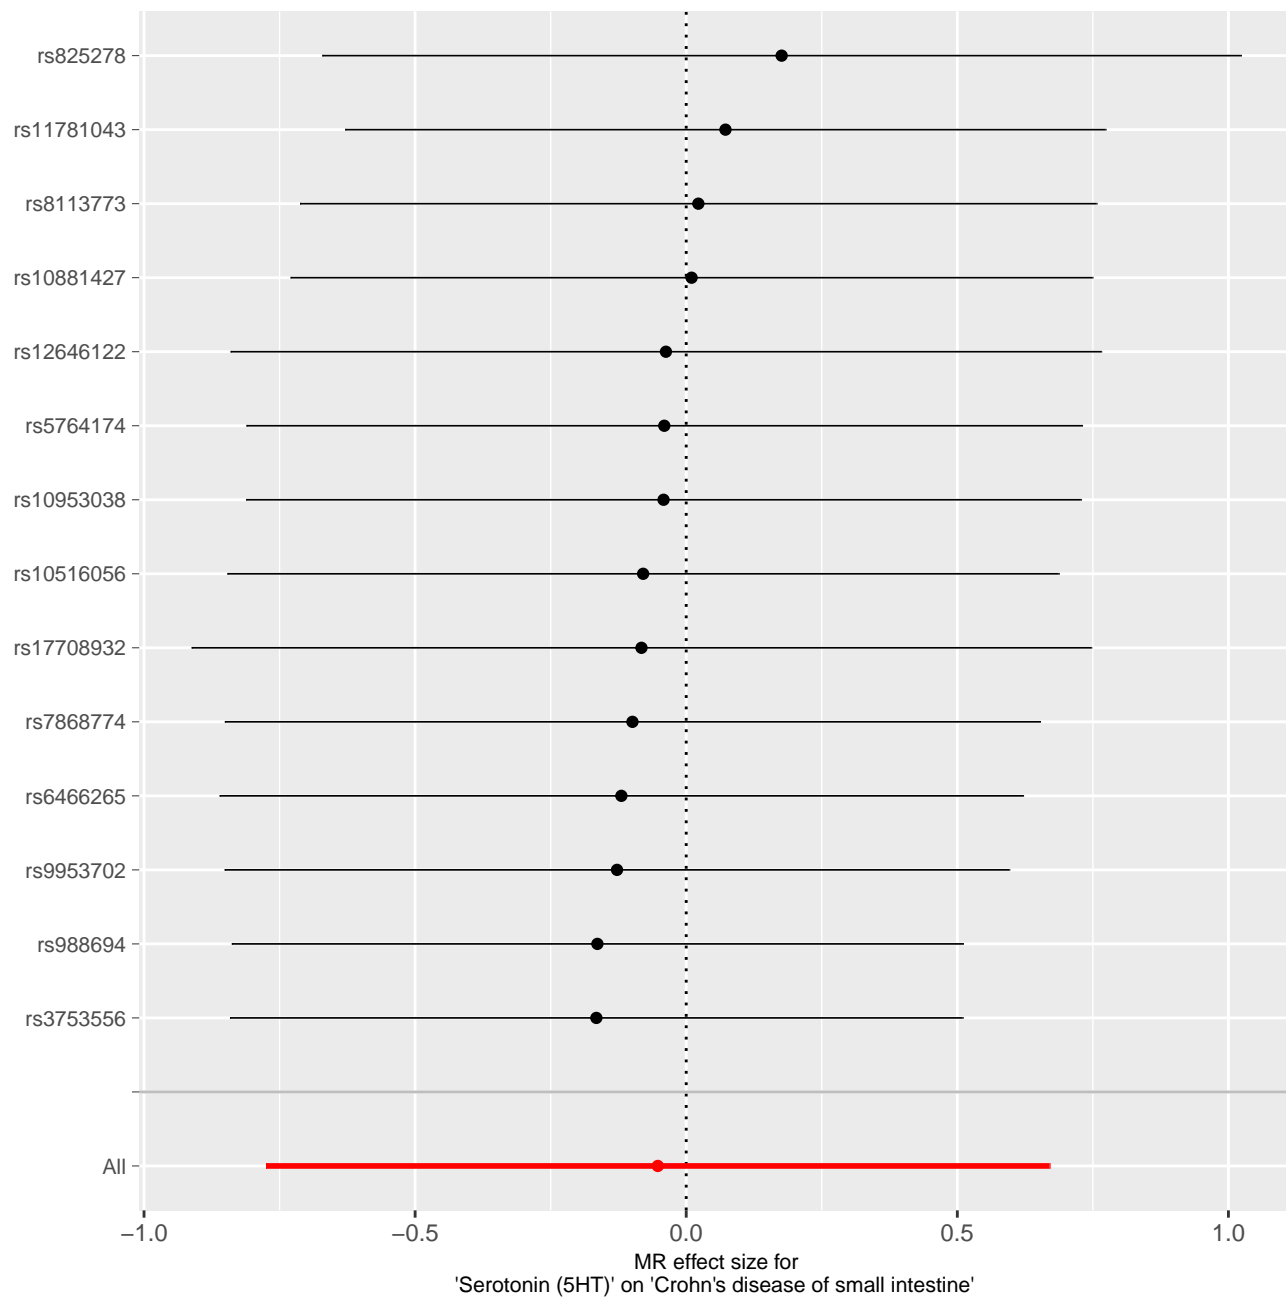

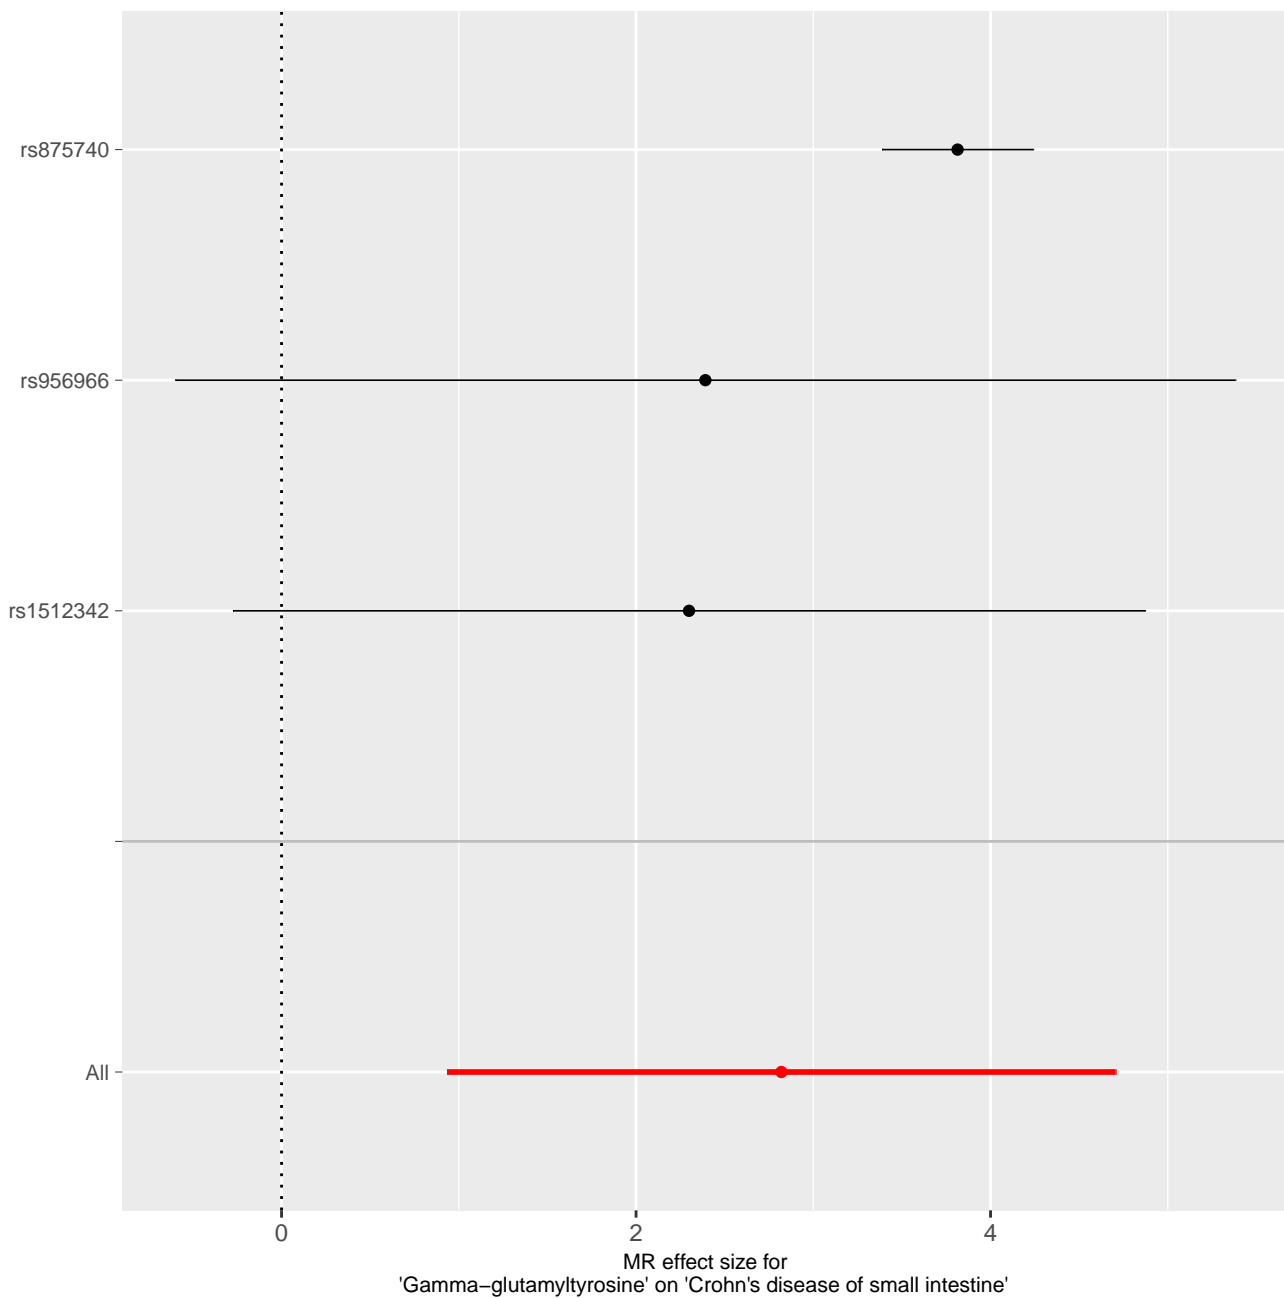

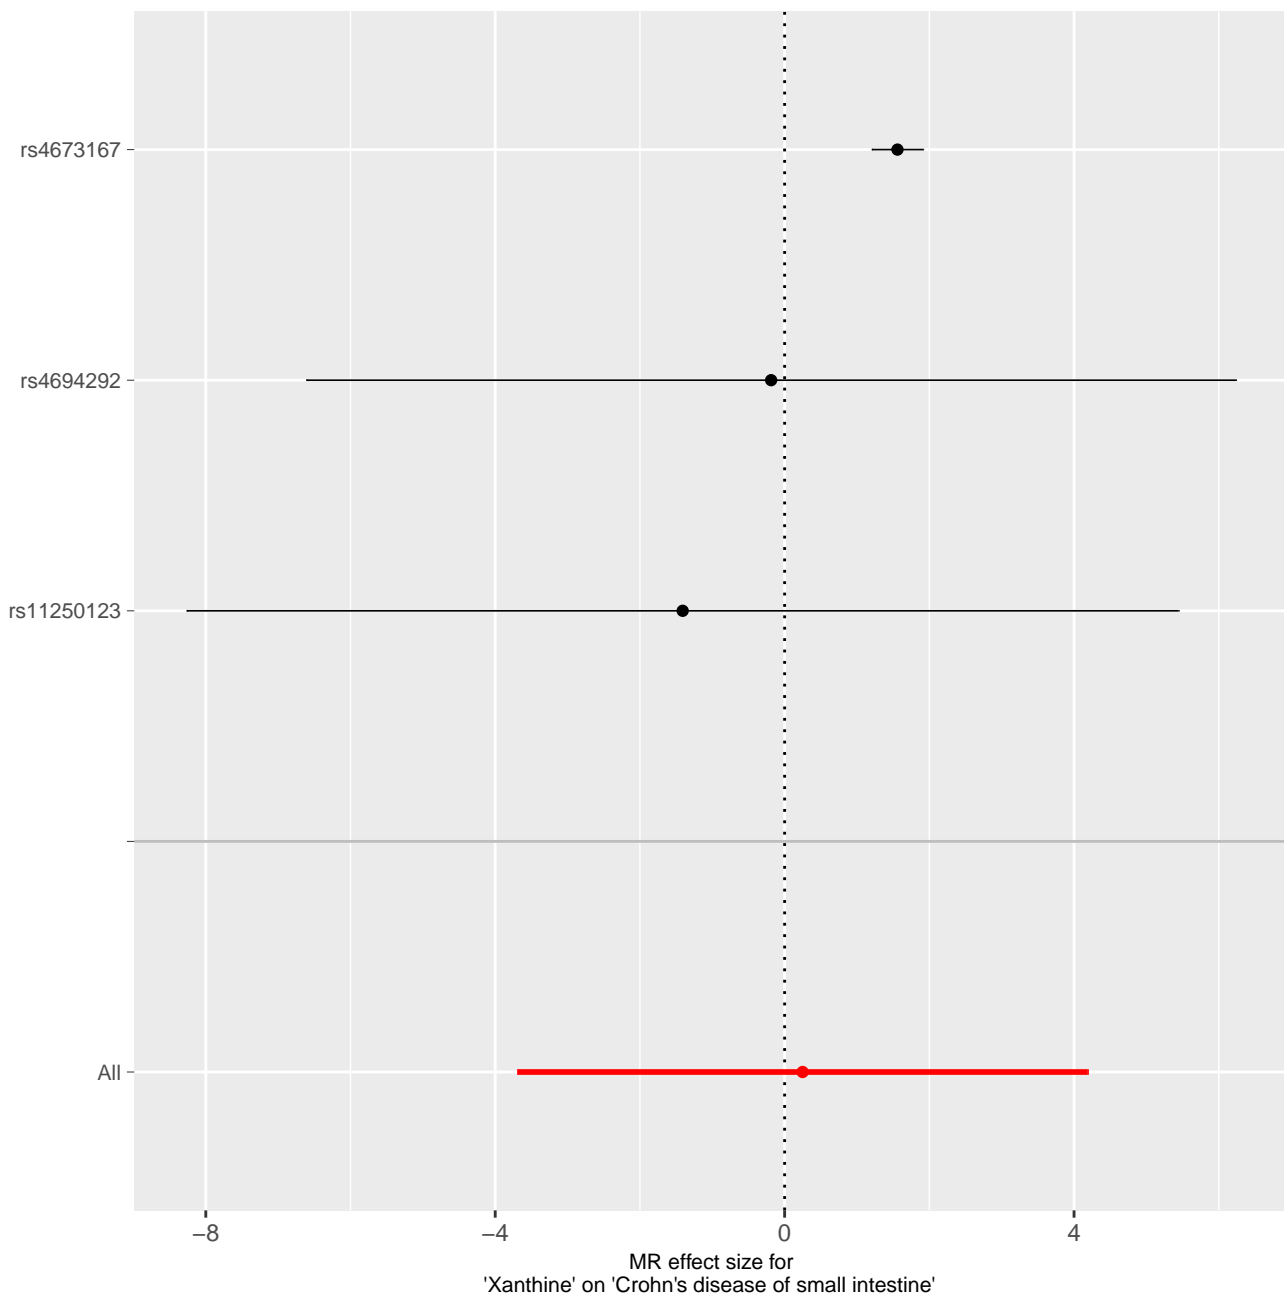

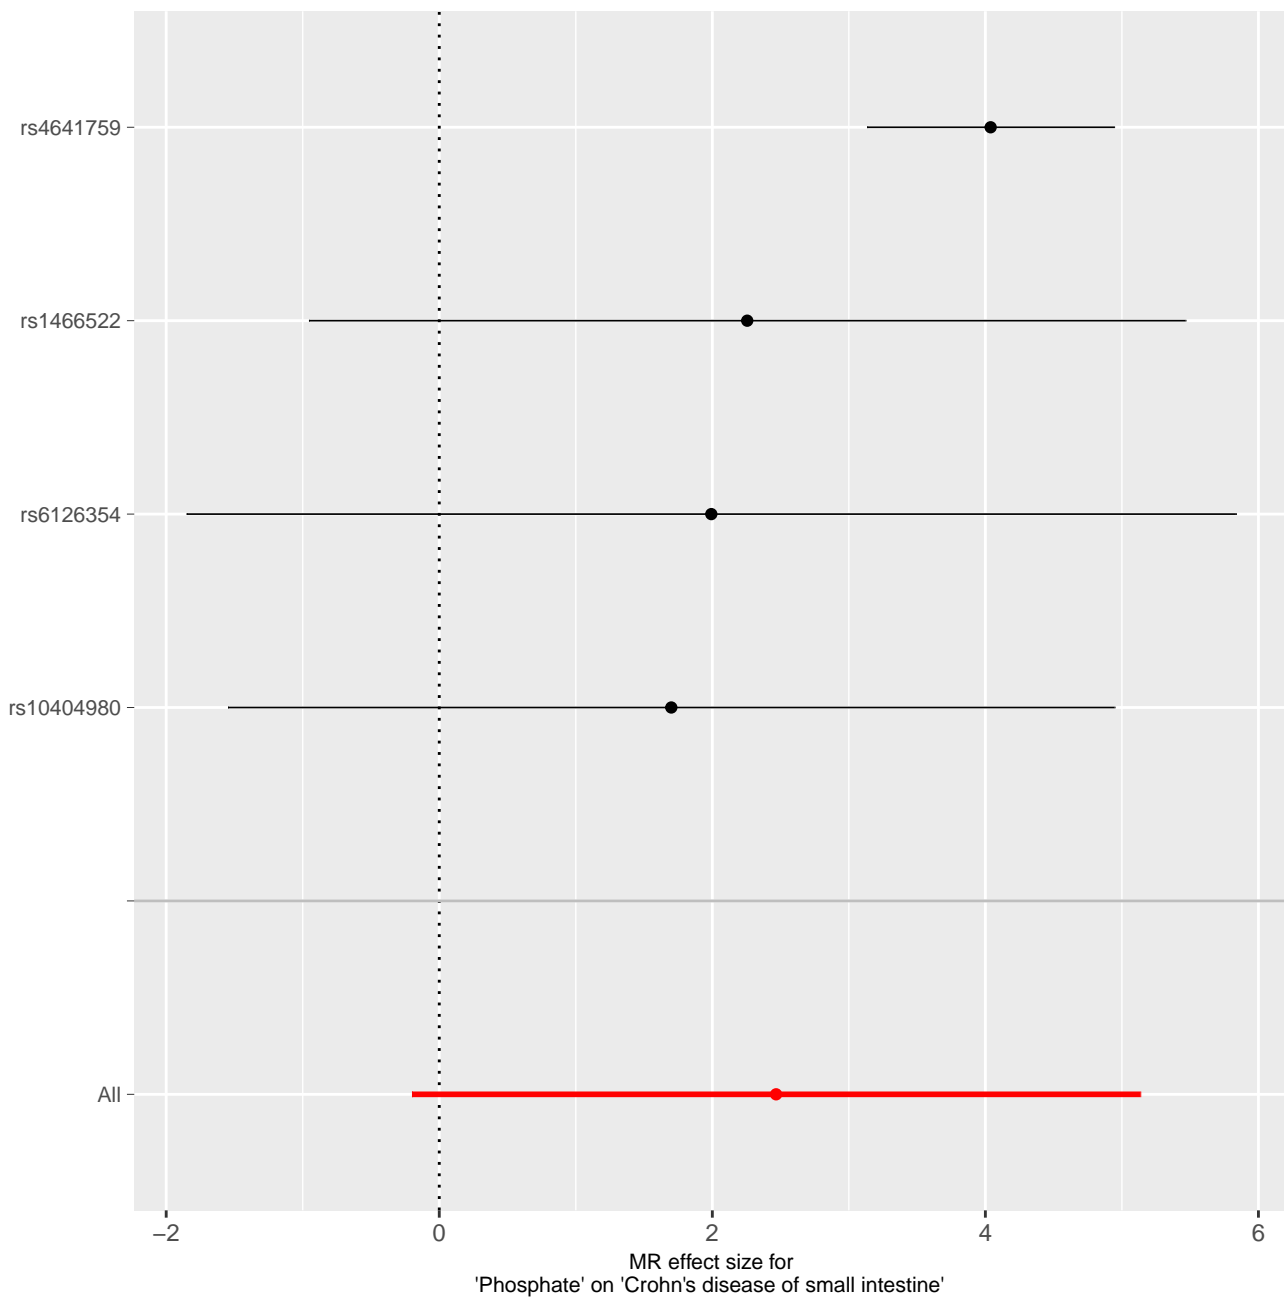



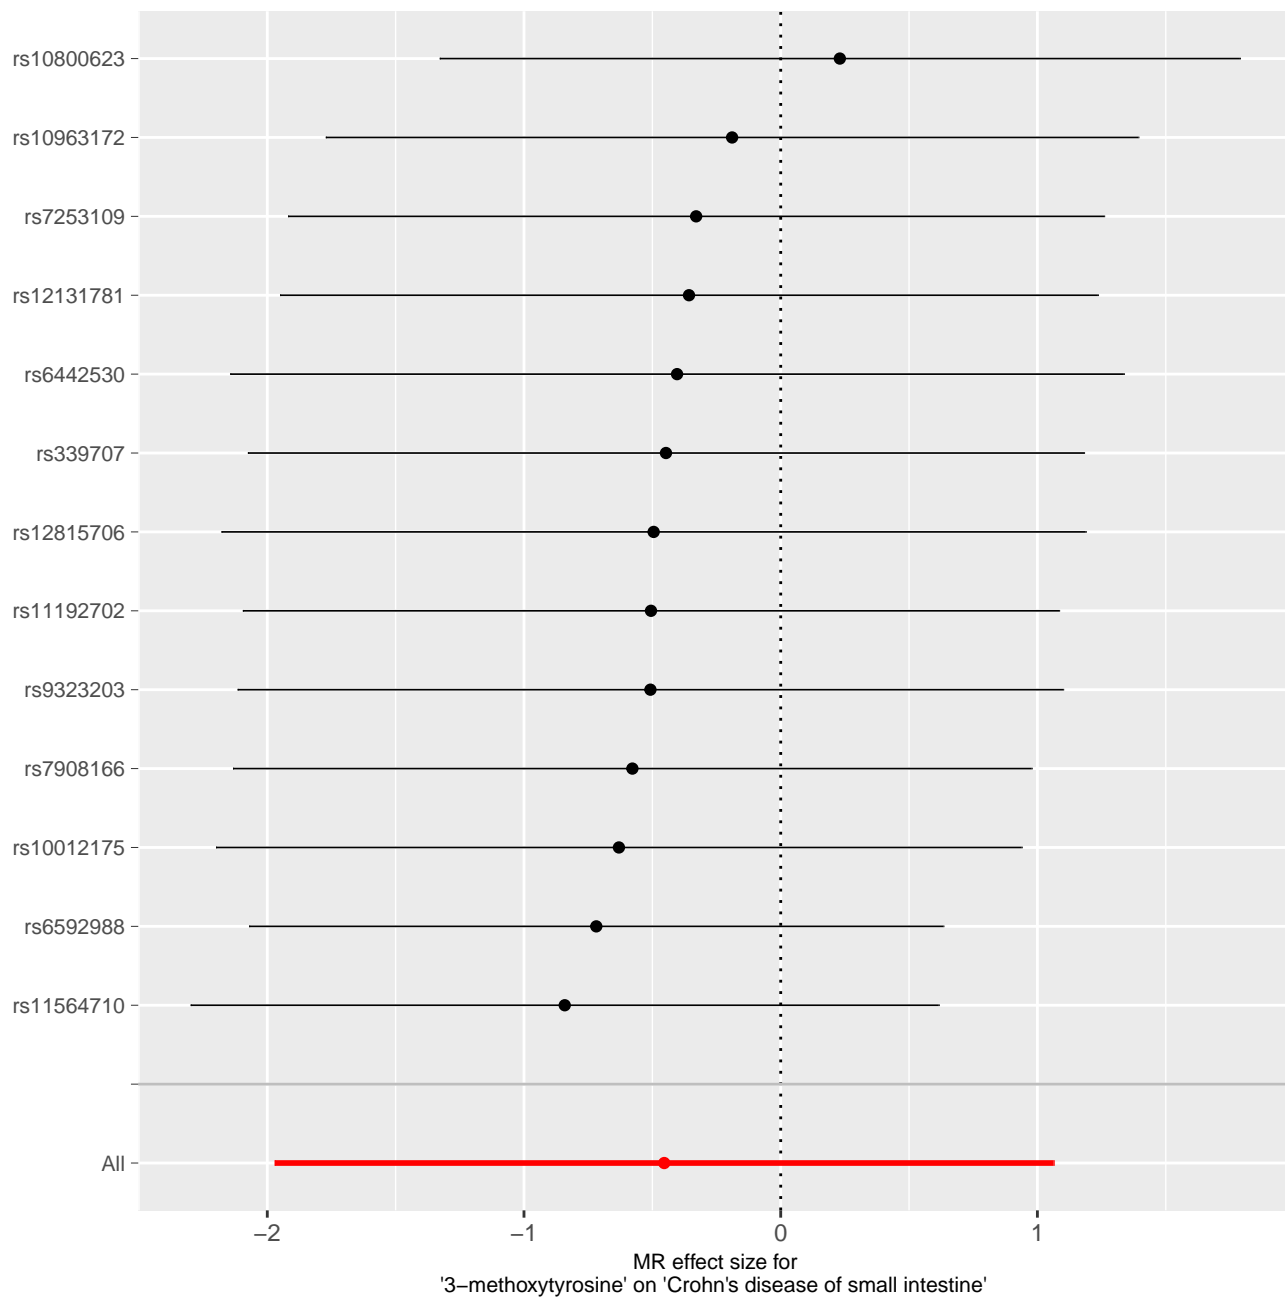

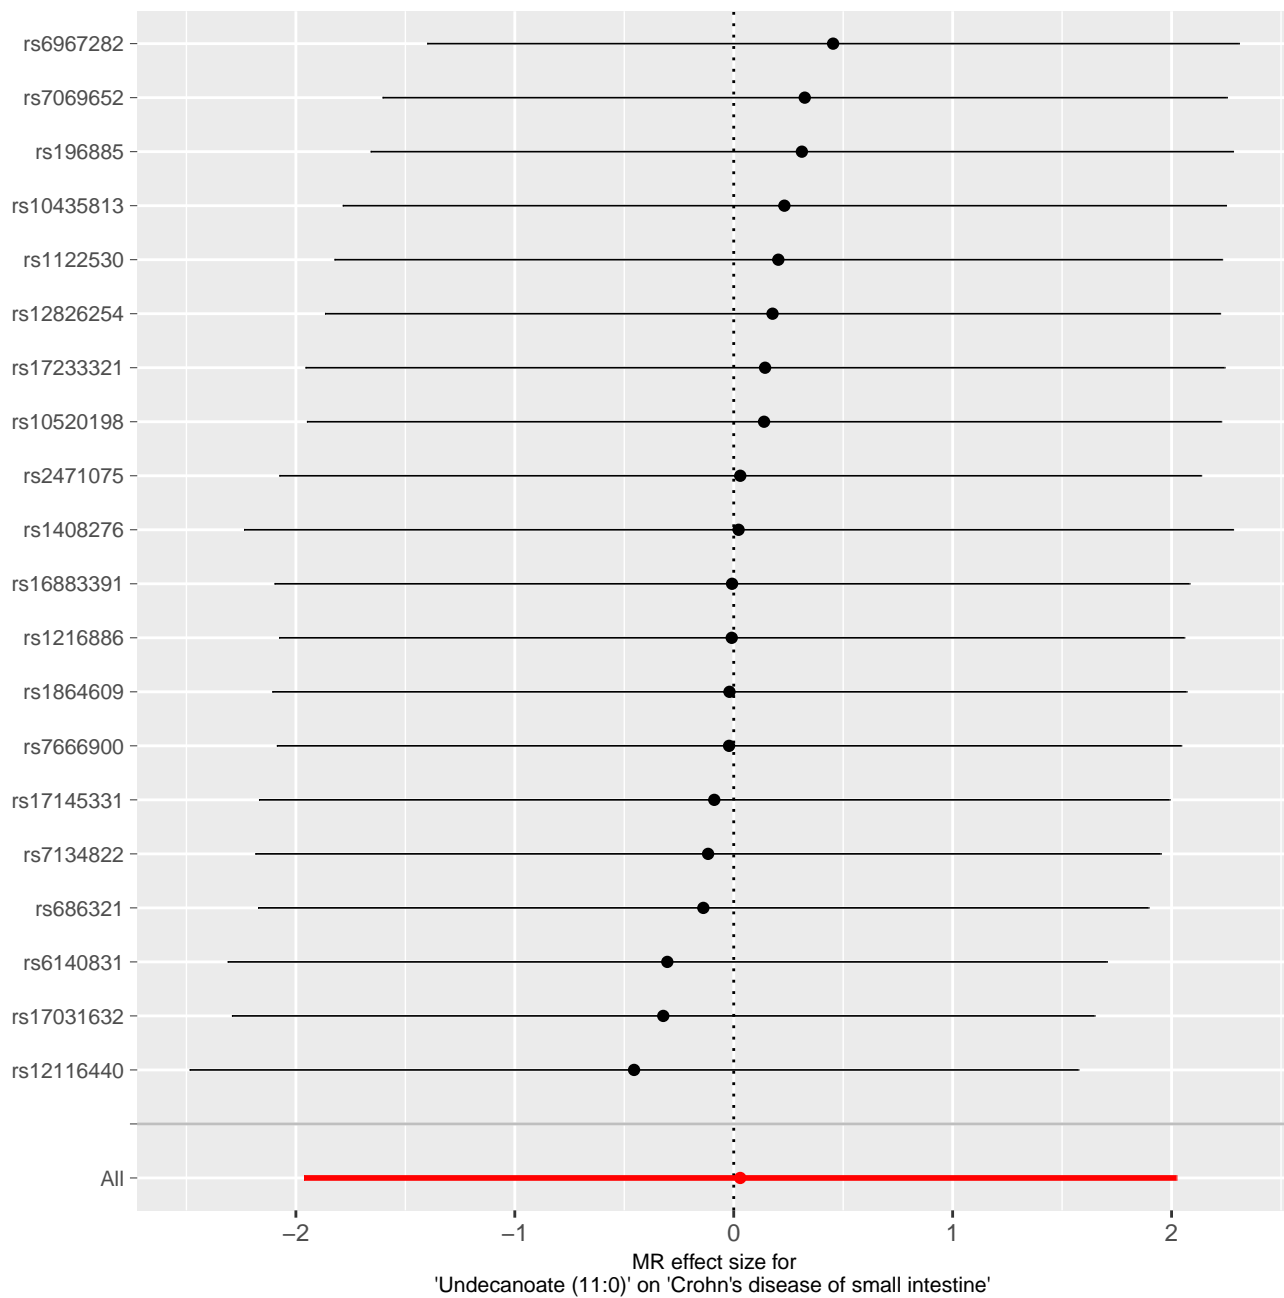

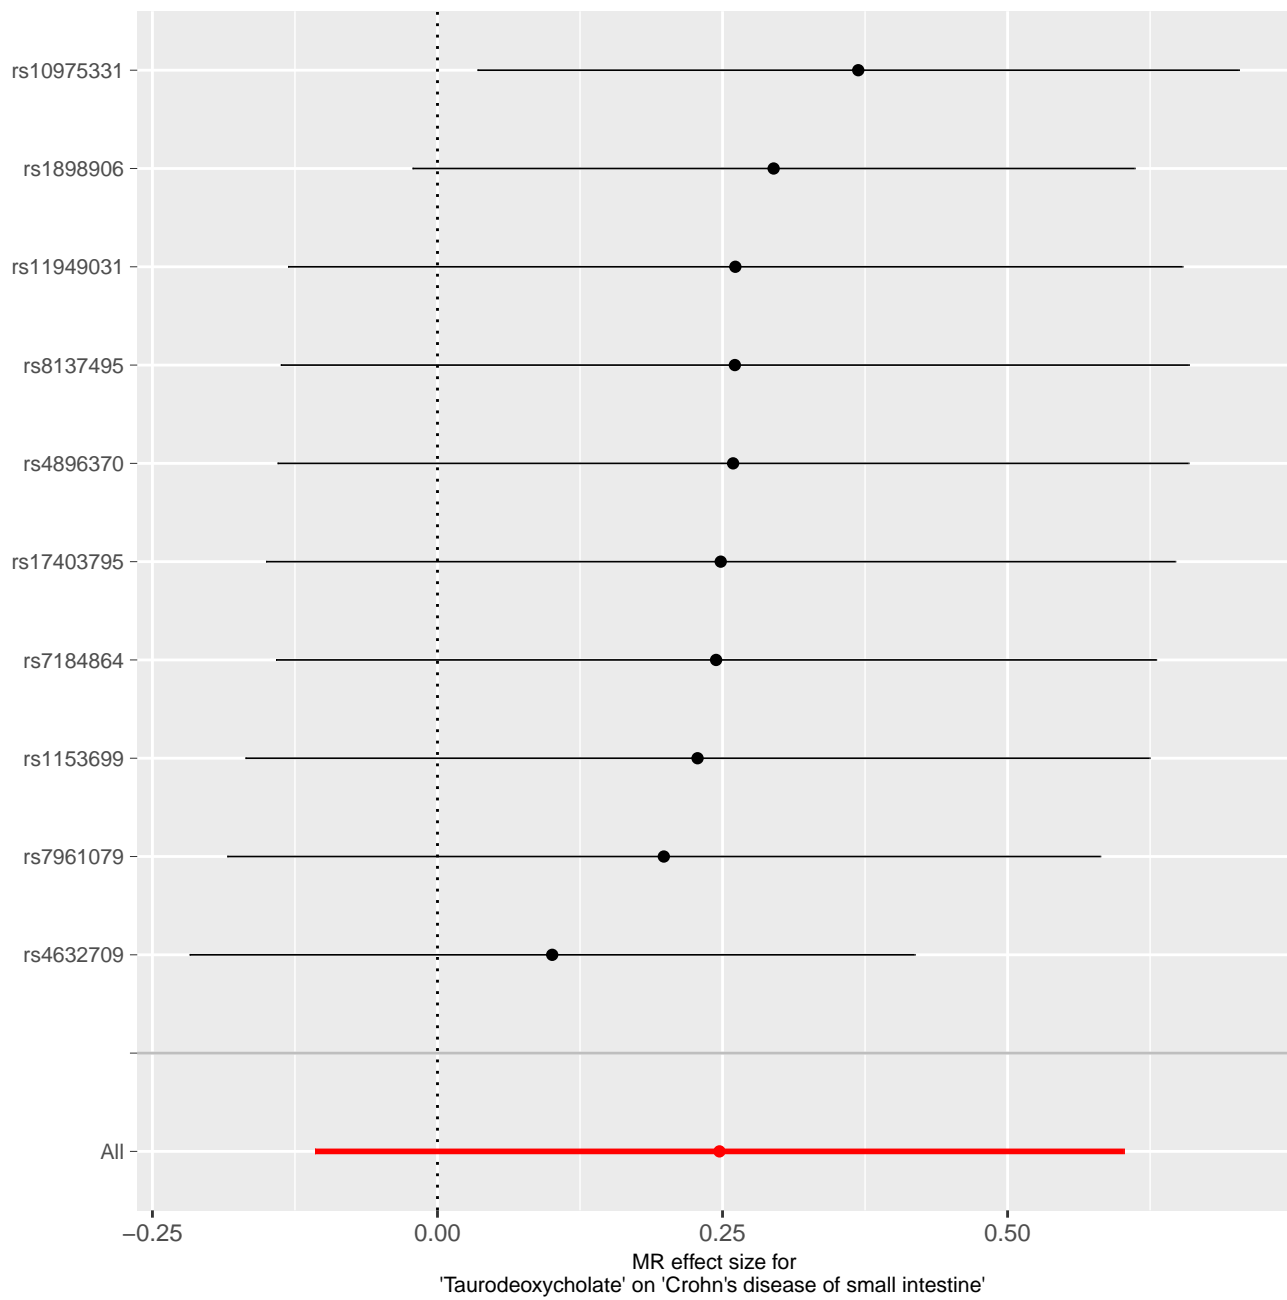

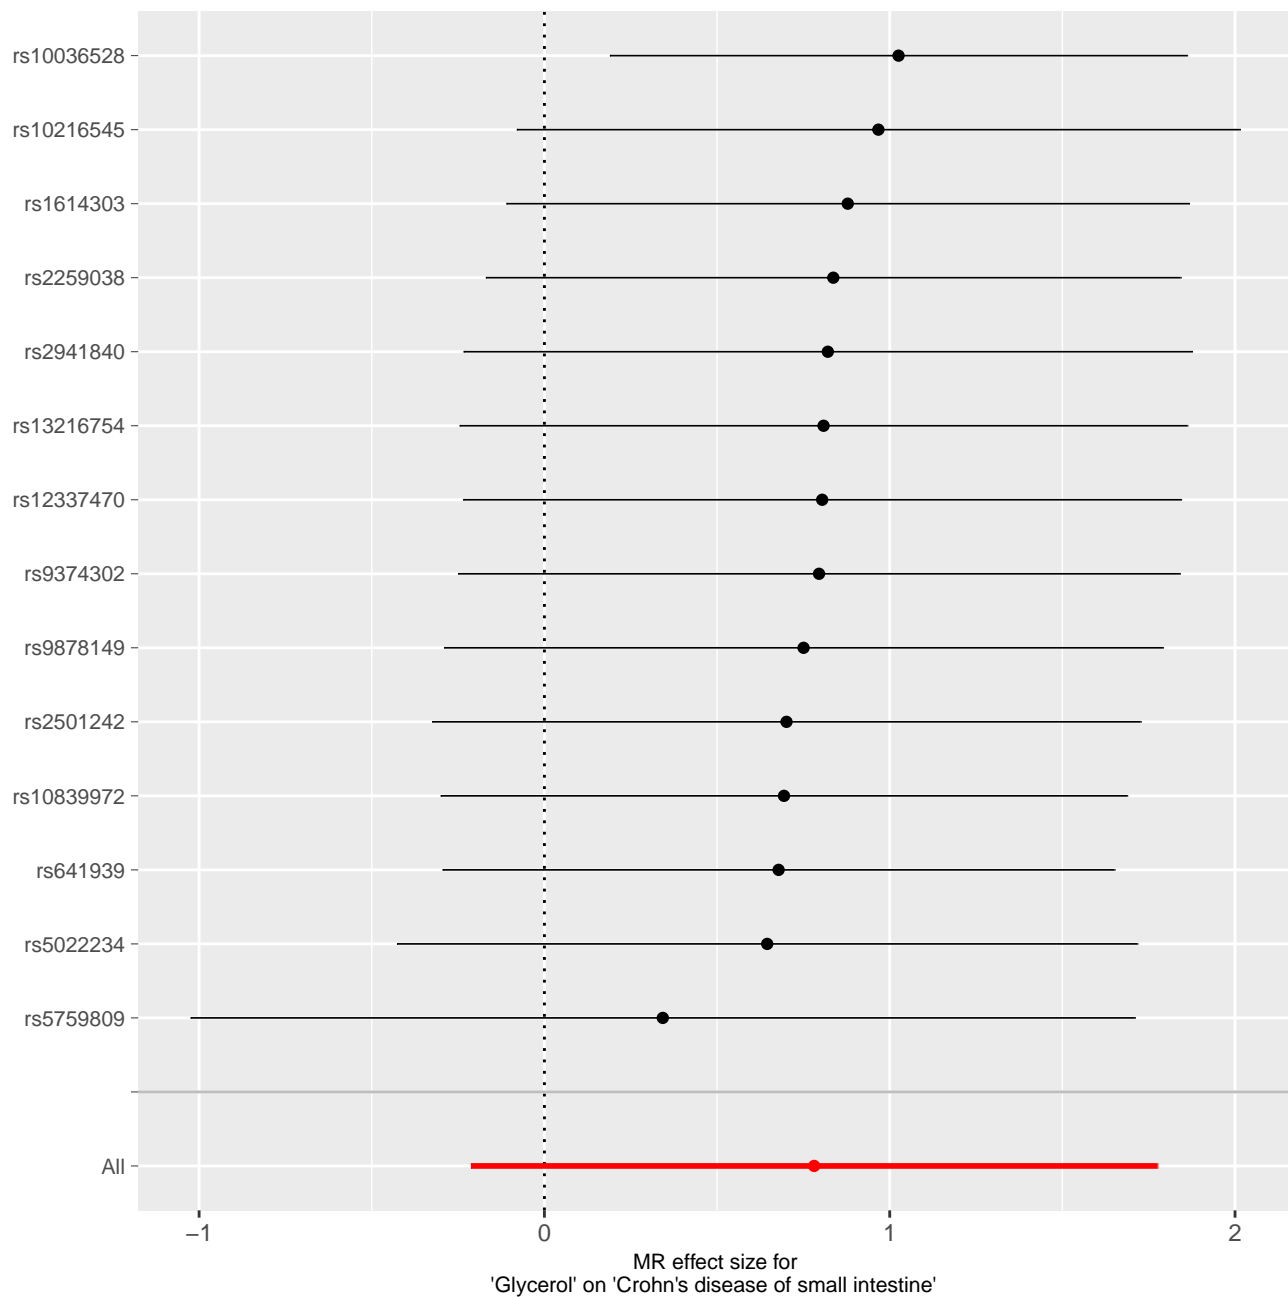

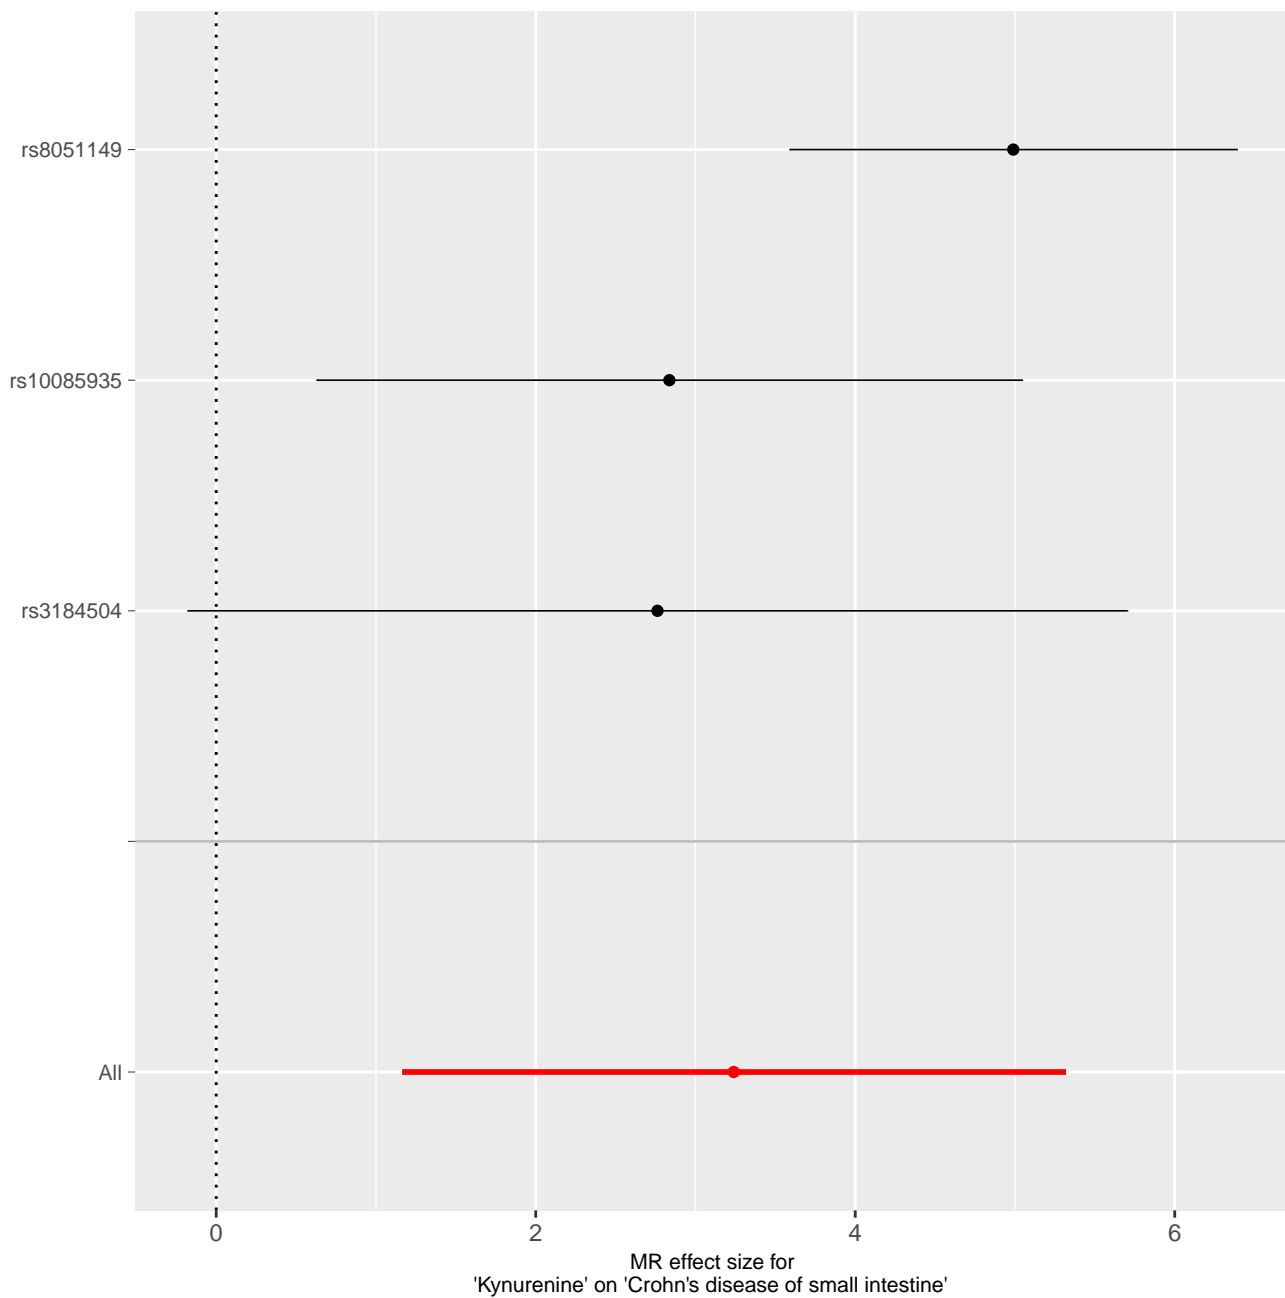

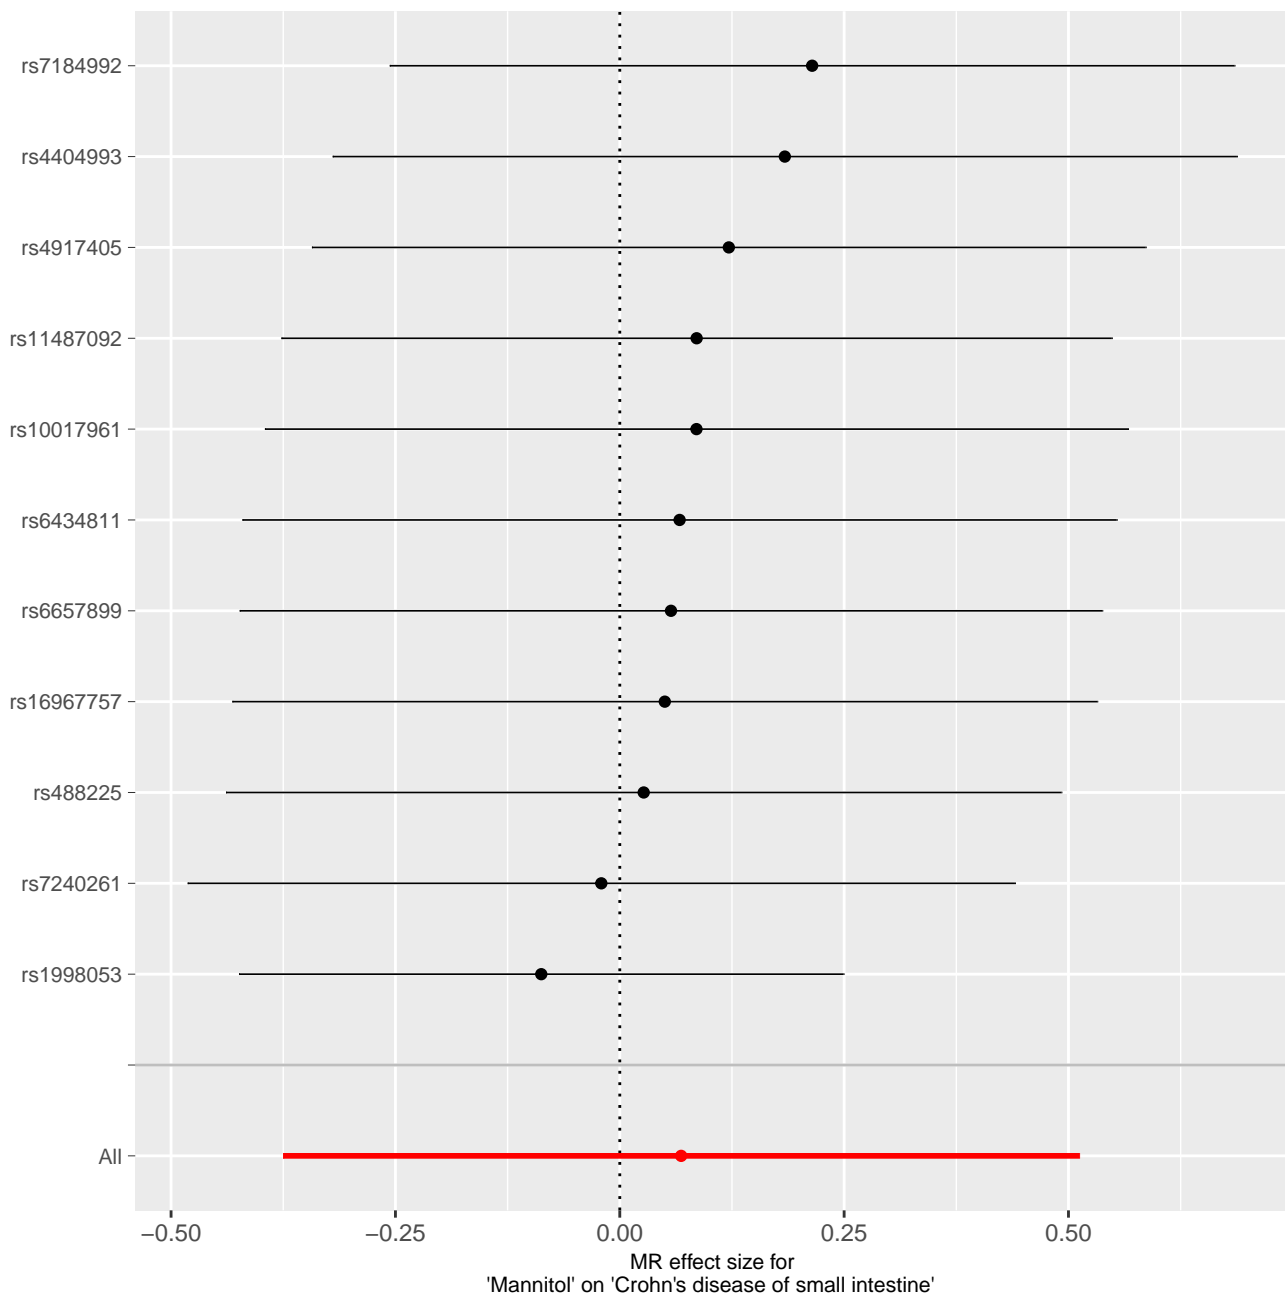

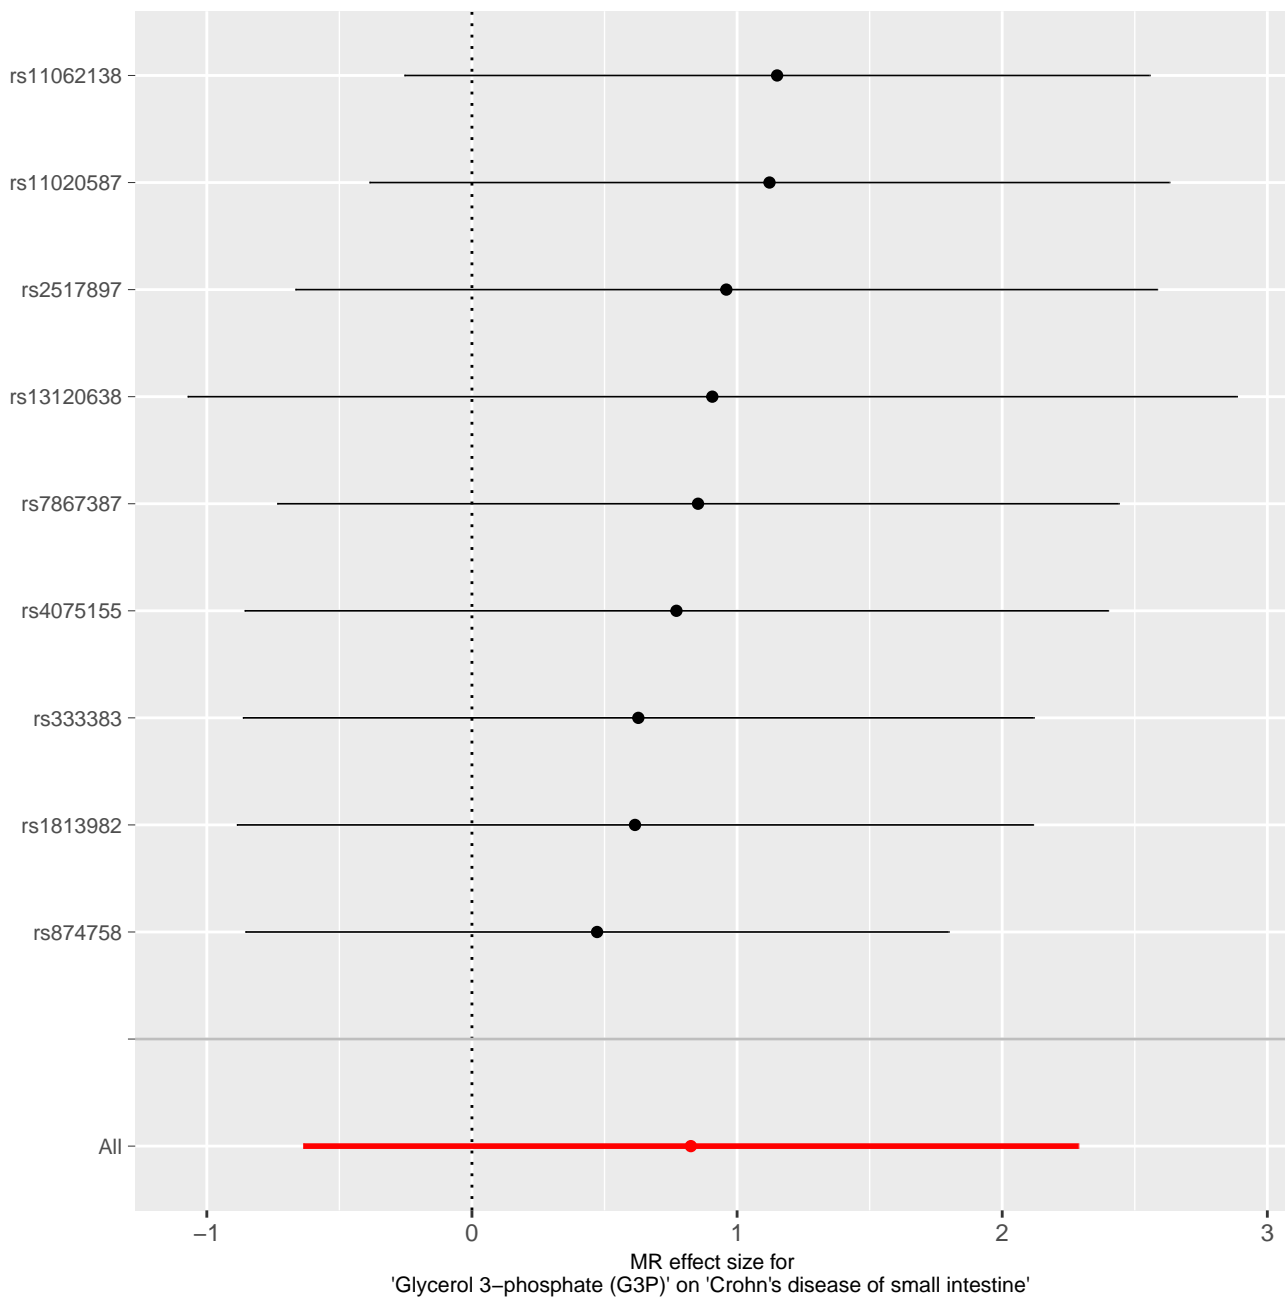

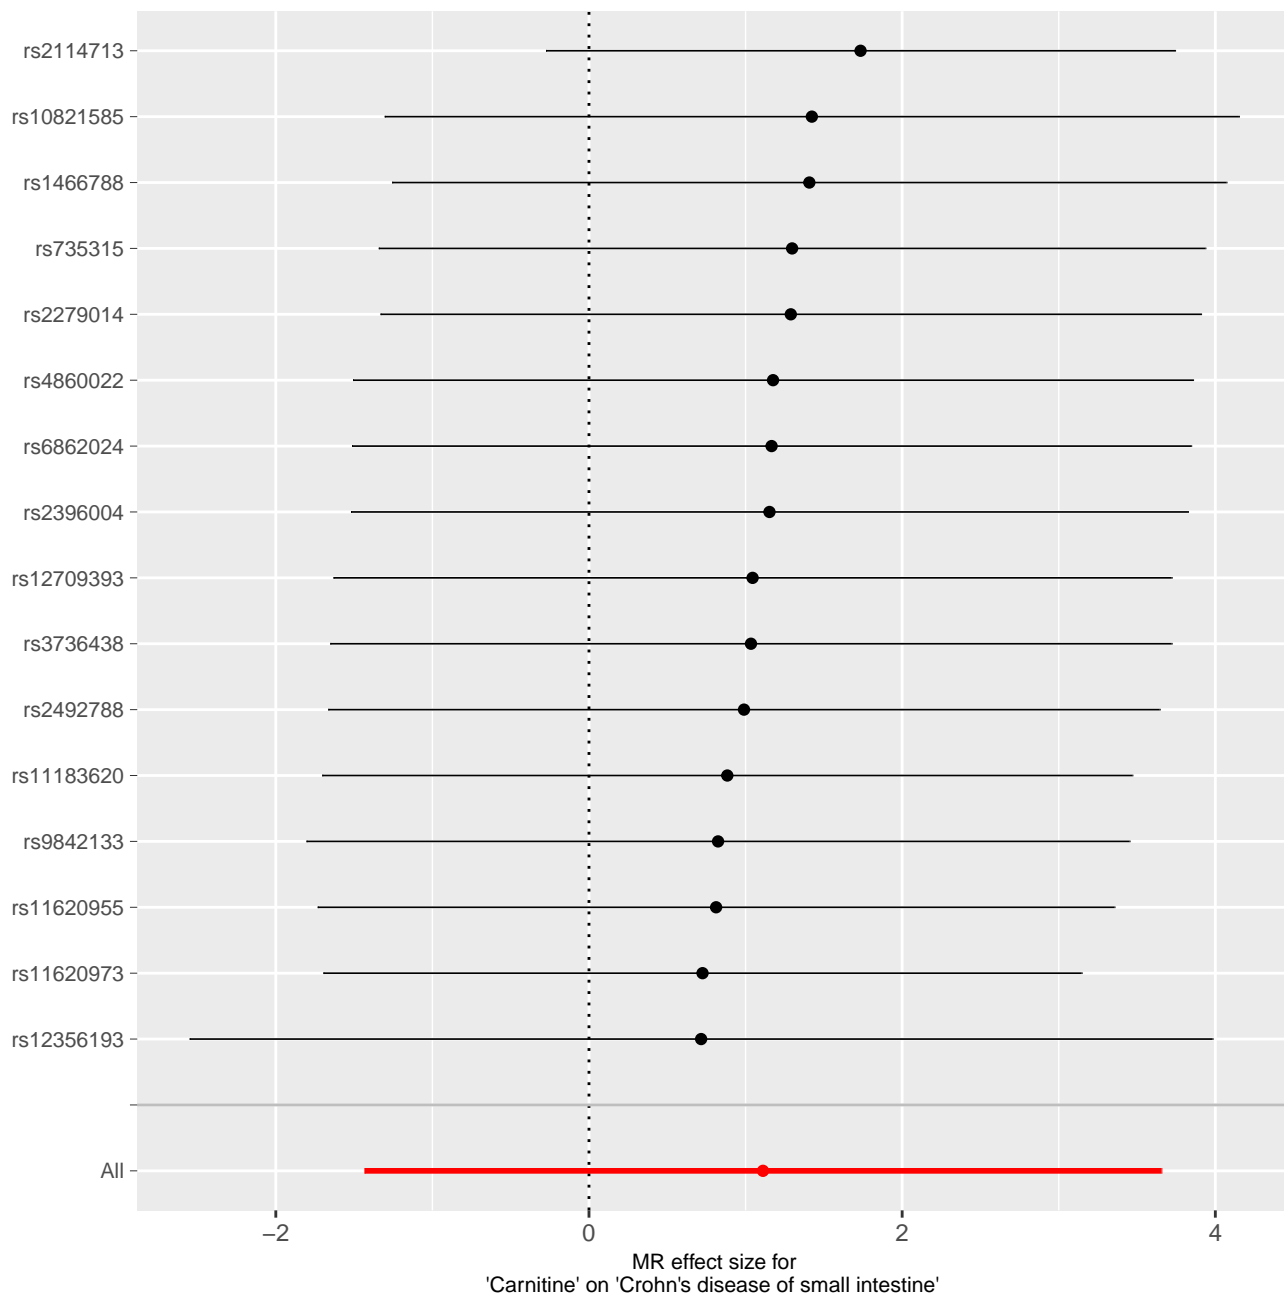



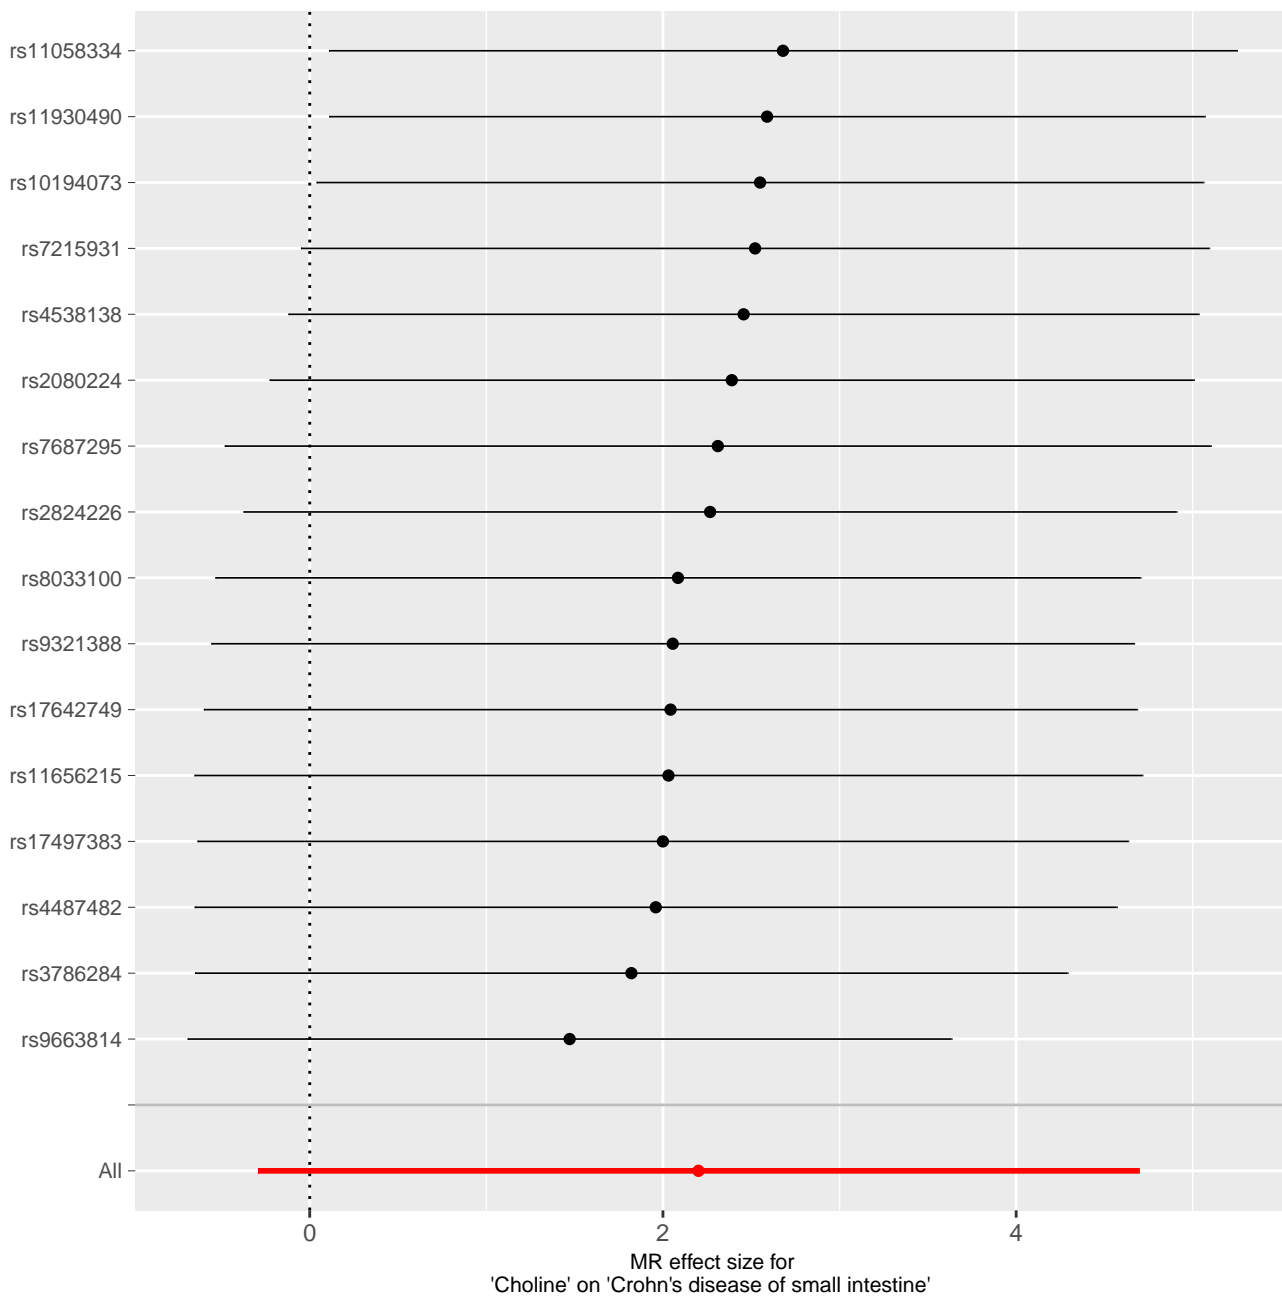

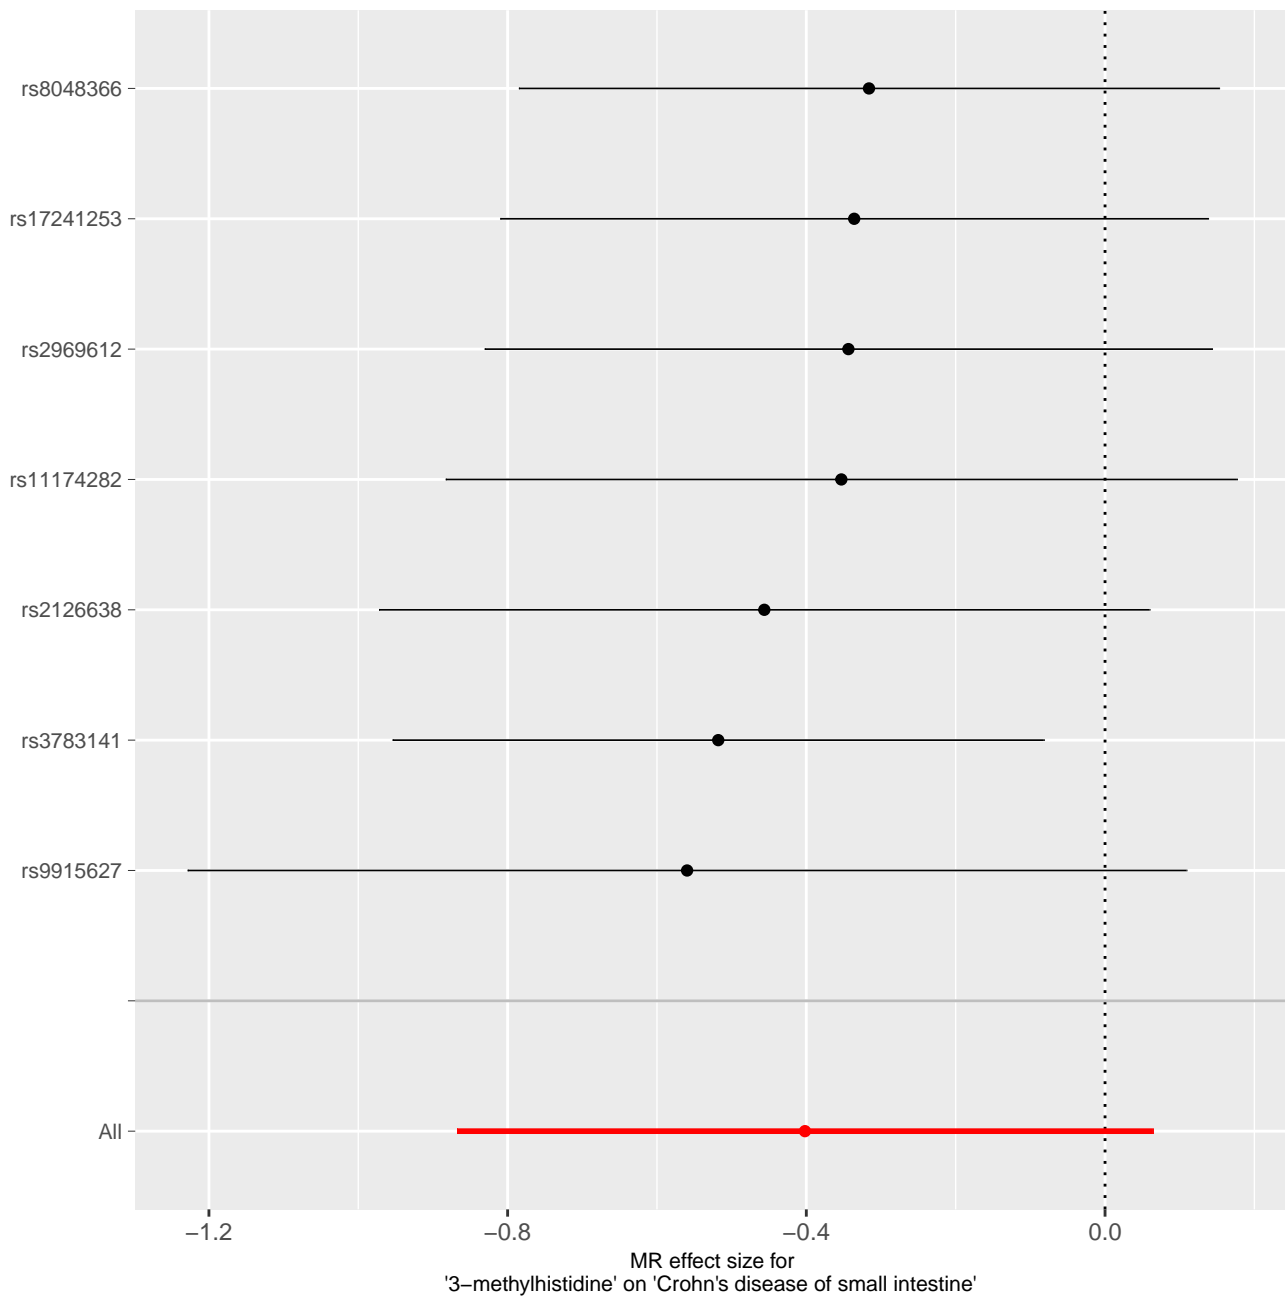

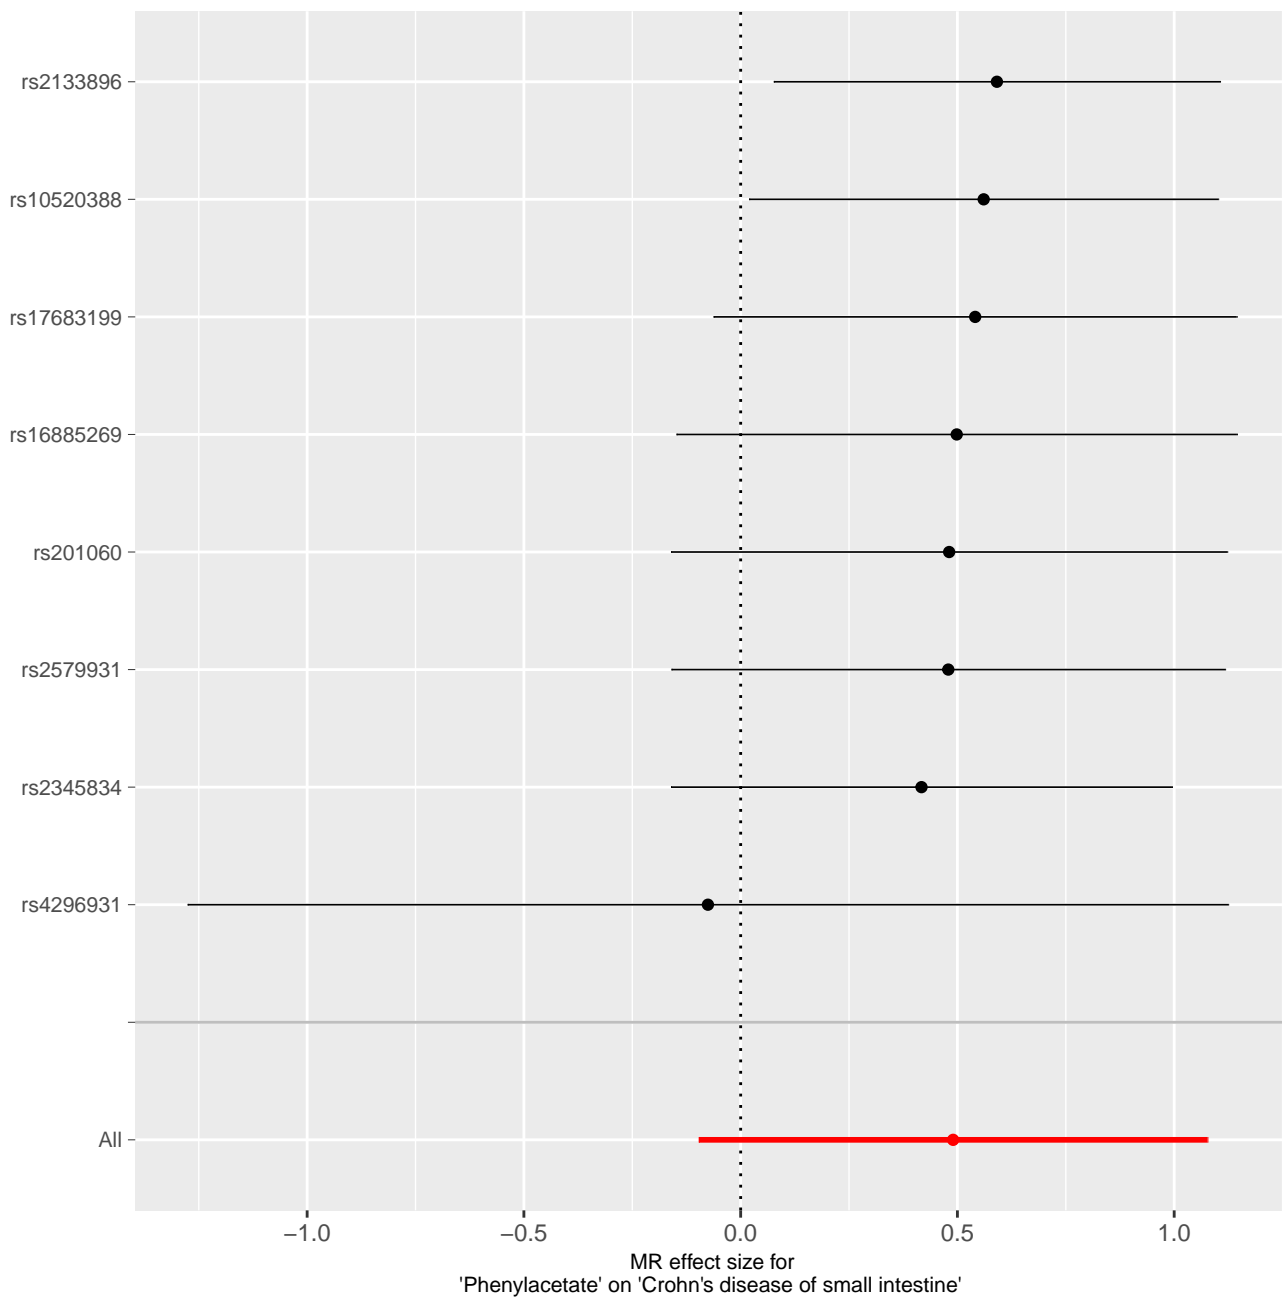

Batch 631 : Glycerophosphorylcholine (GPC) on Crohn's disease of small intestine

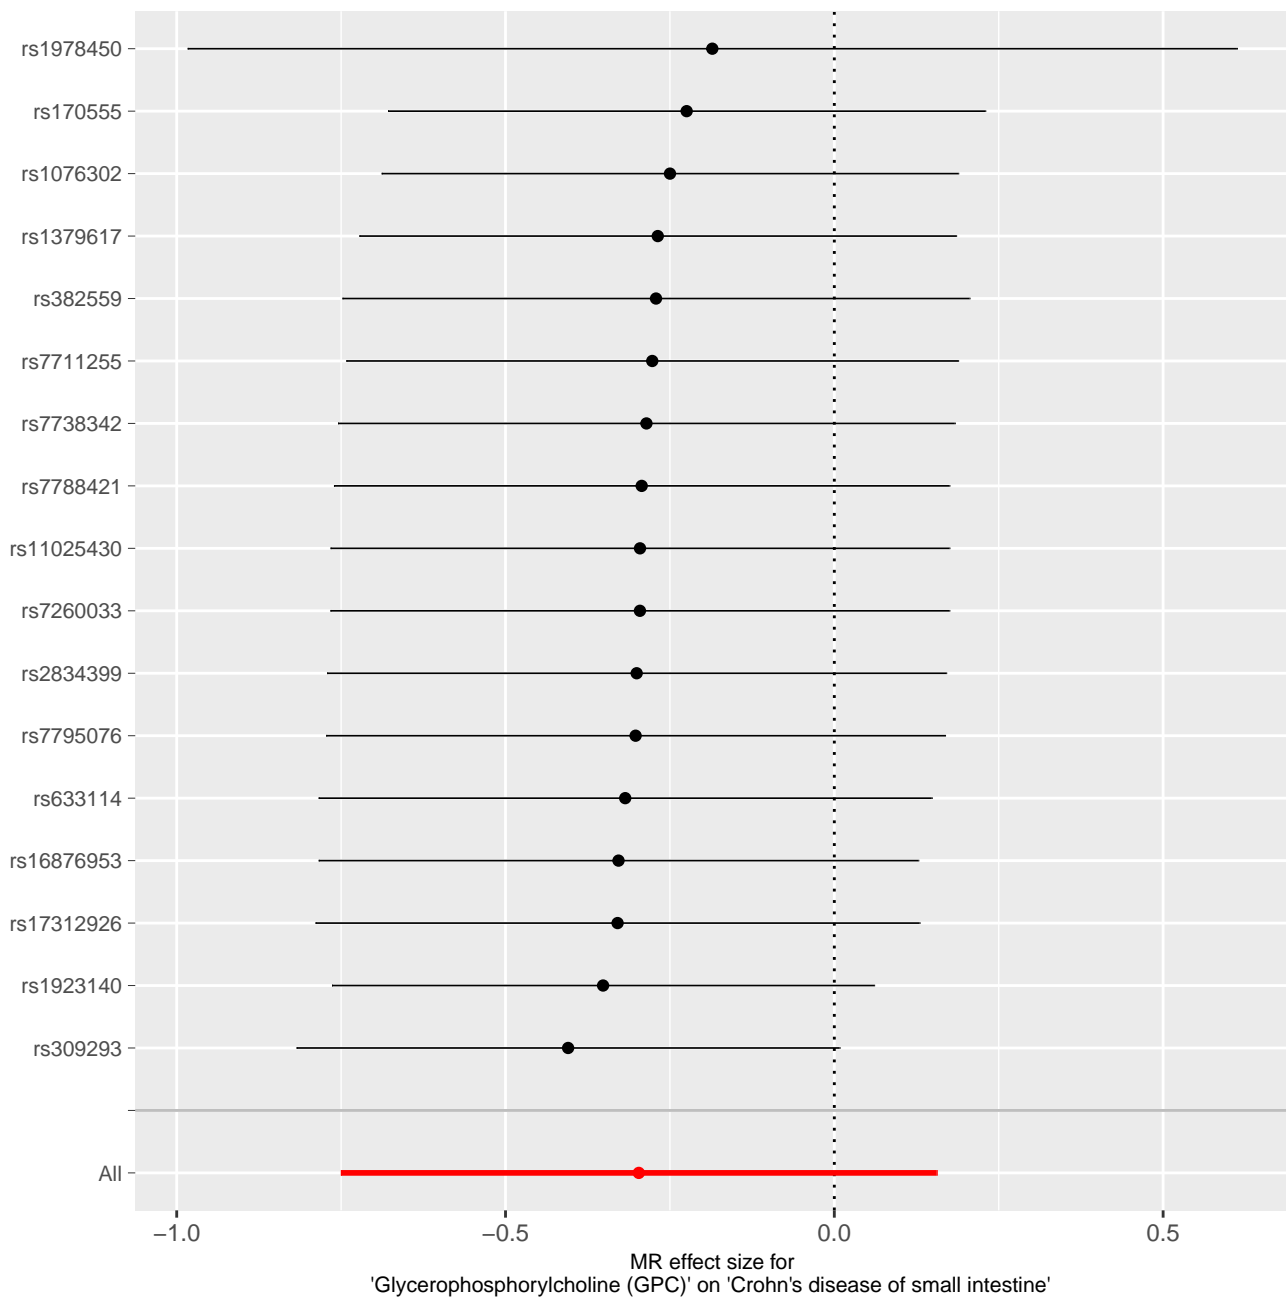

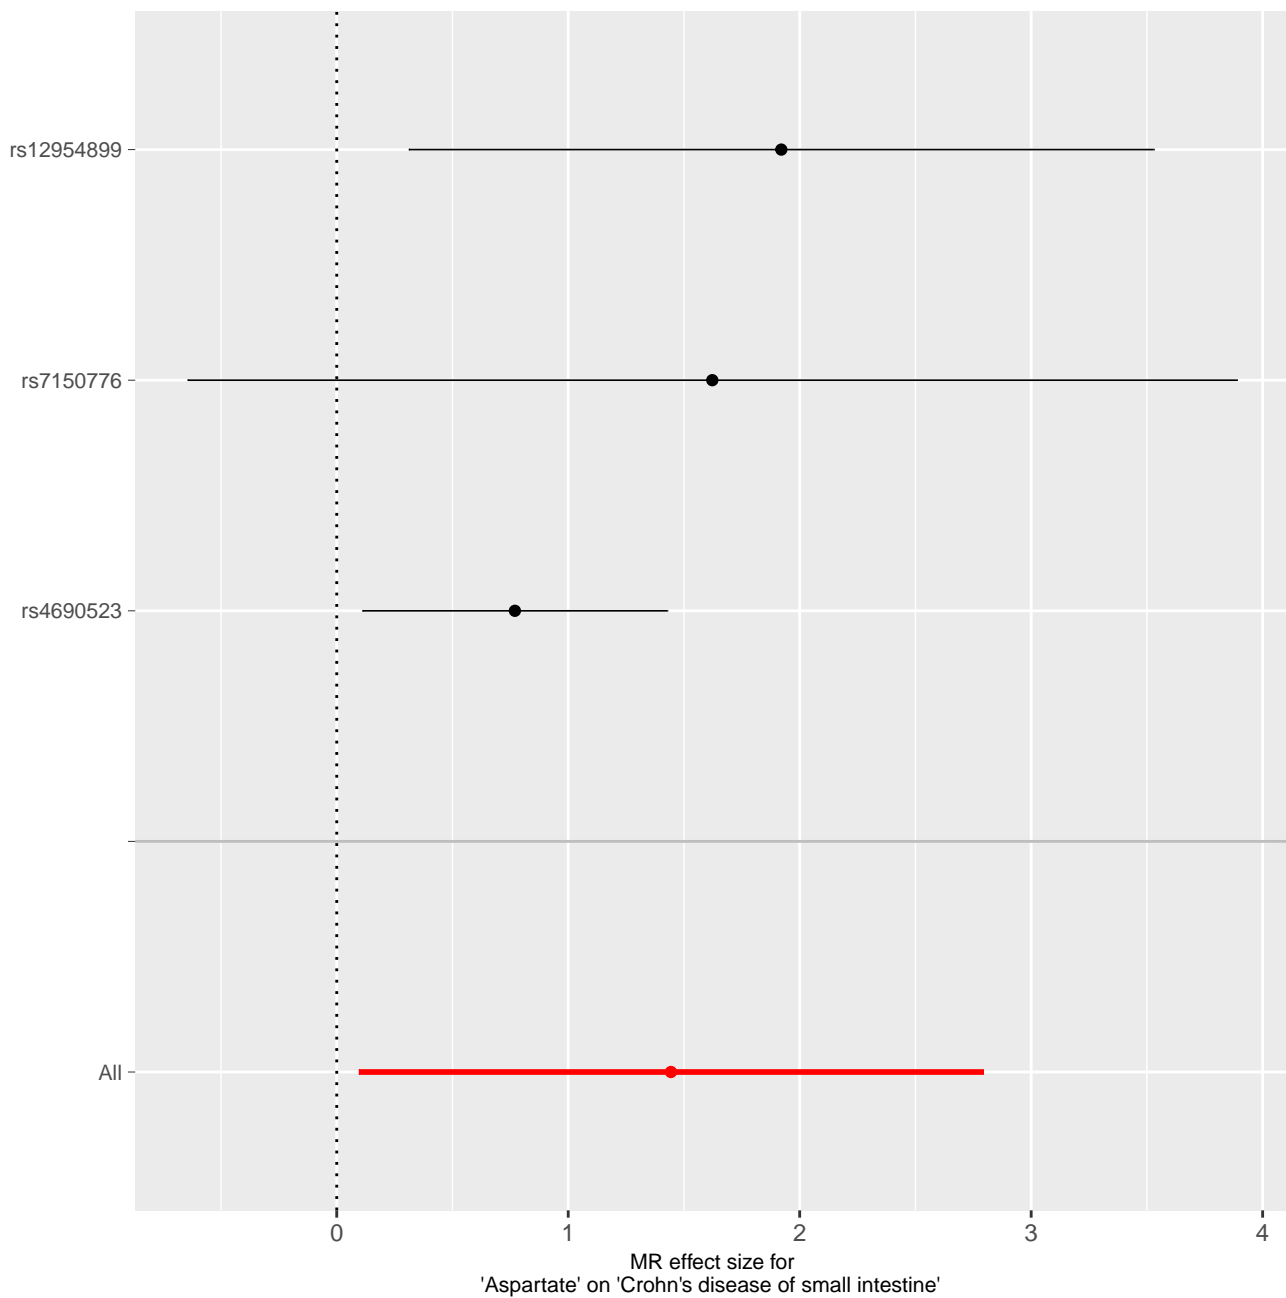

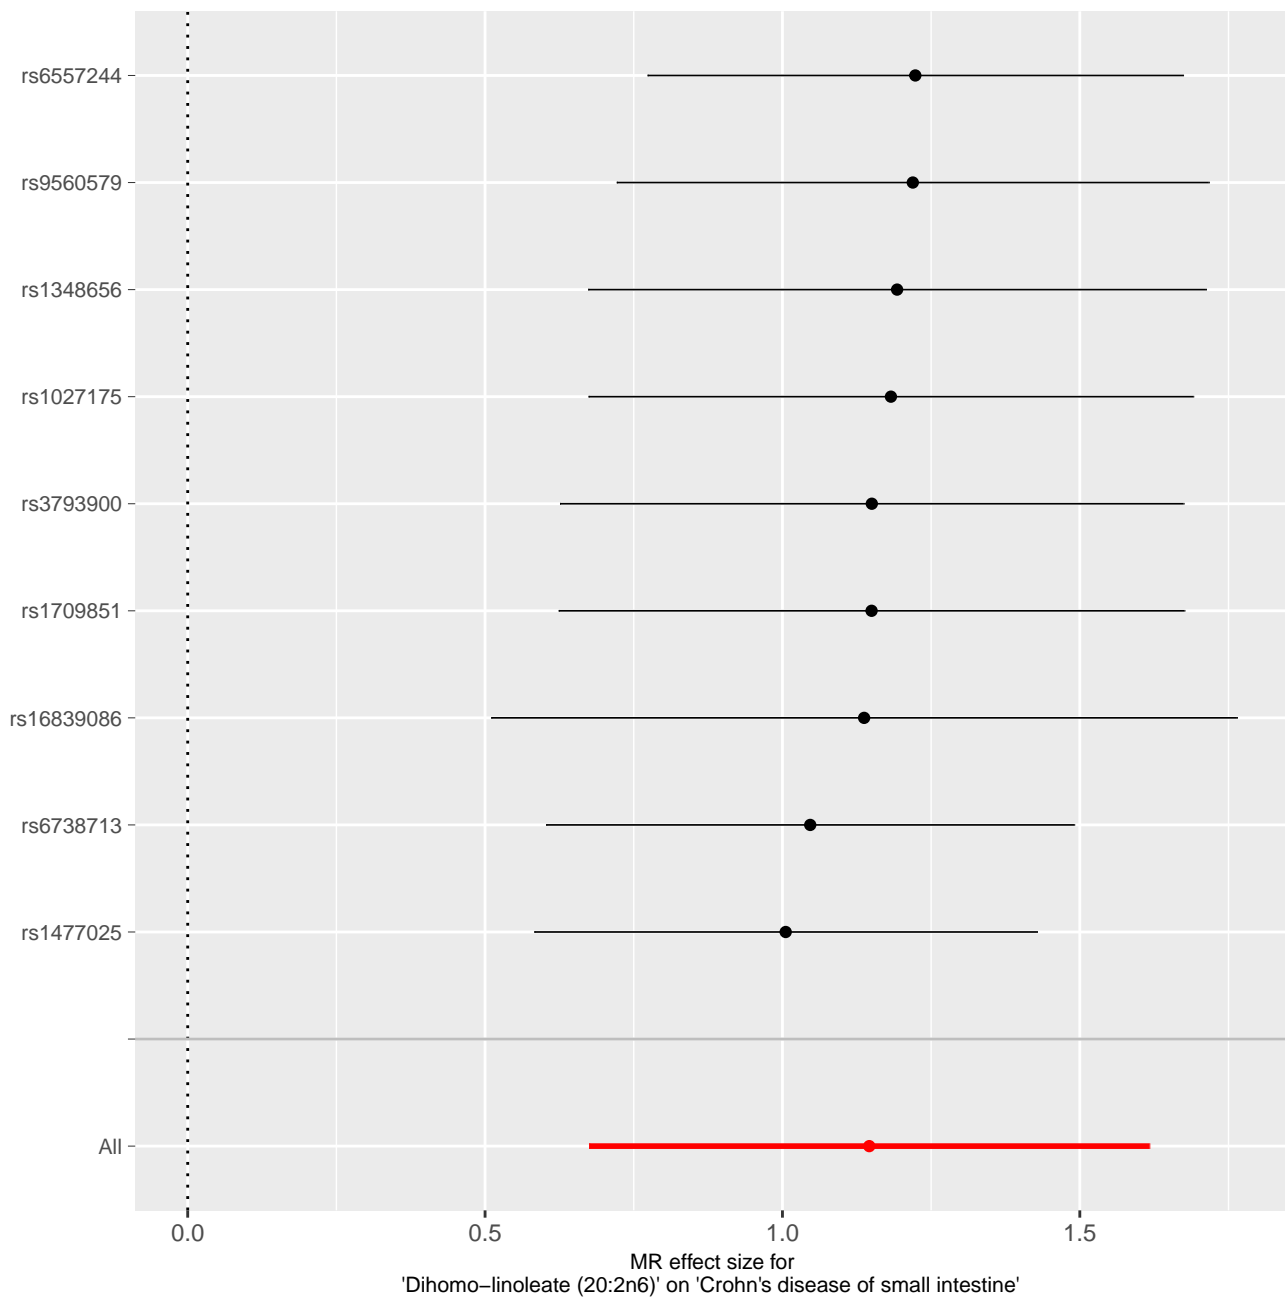

Batch 635 : 2-hydroxystearate on Crohn's disease of small intestine

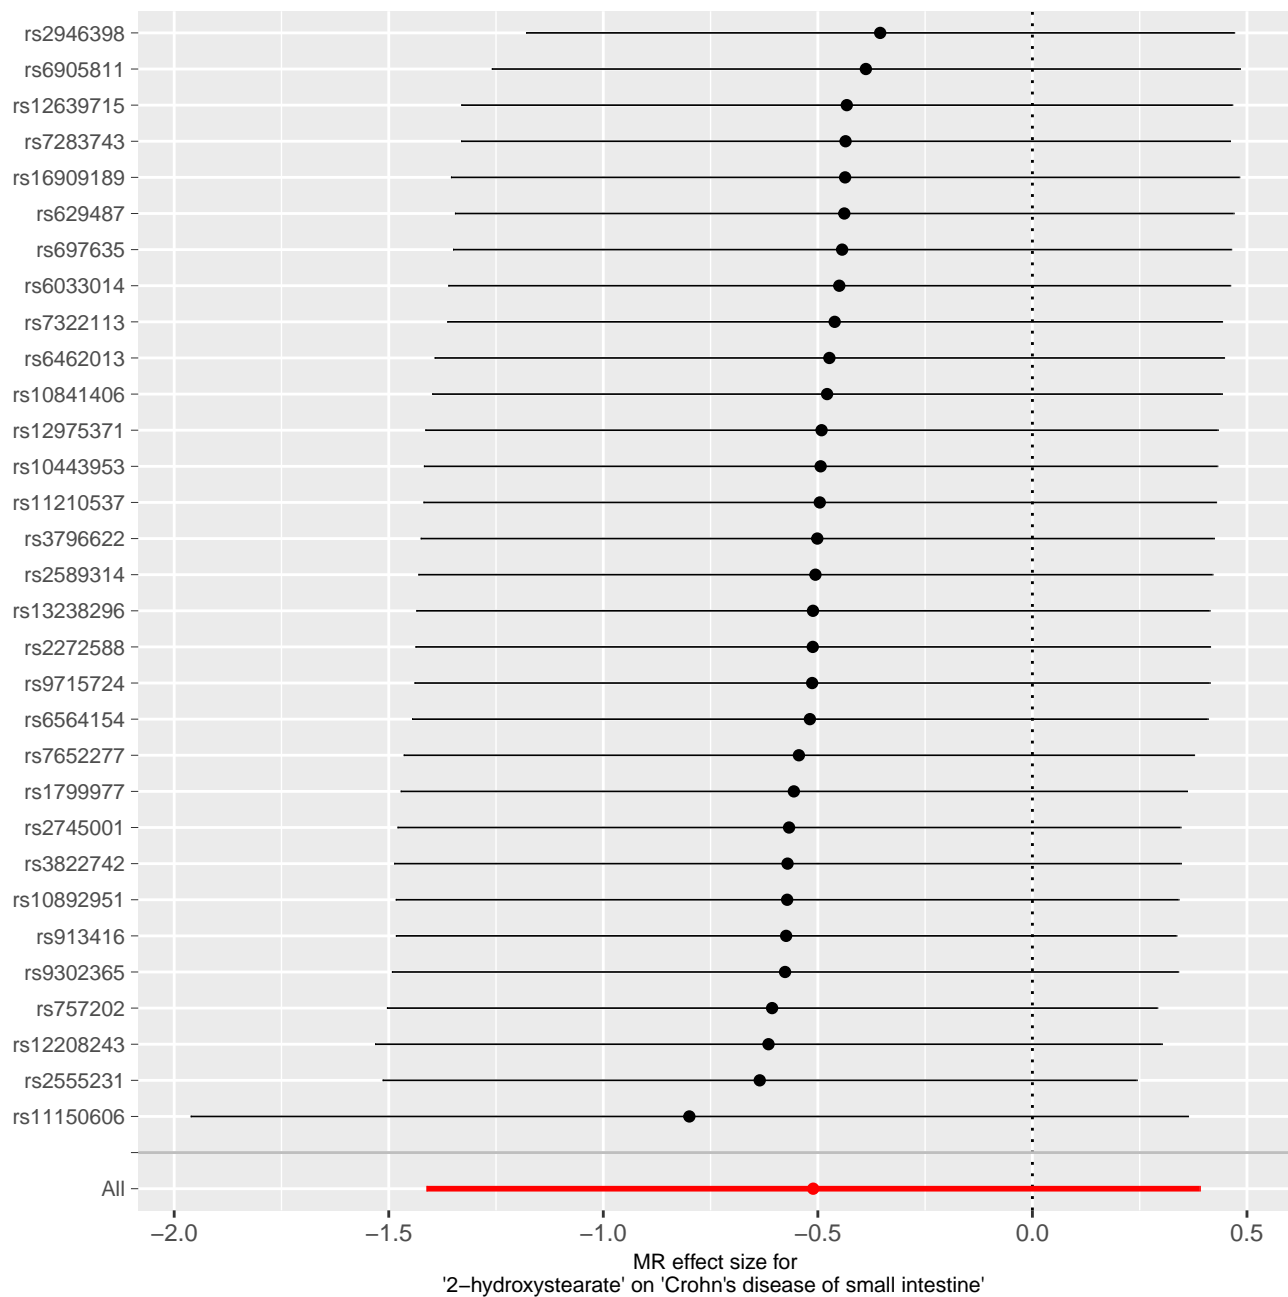

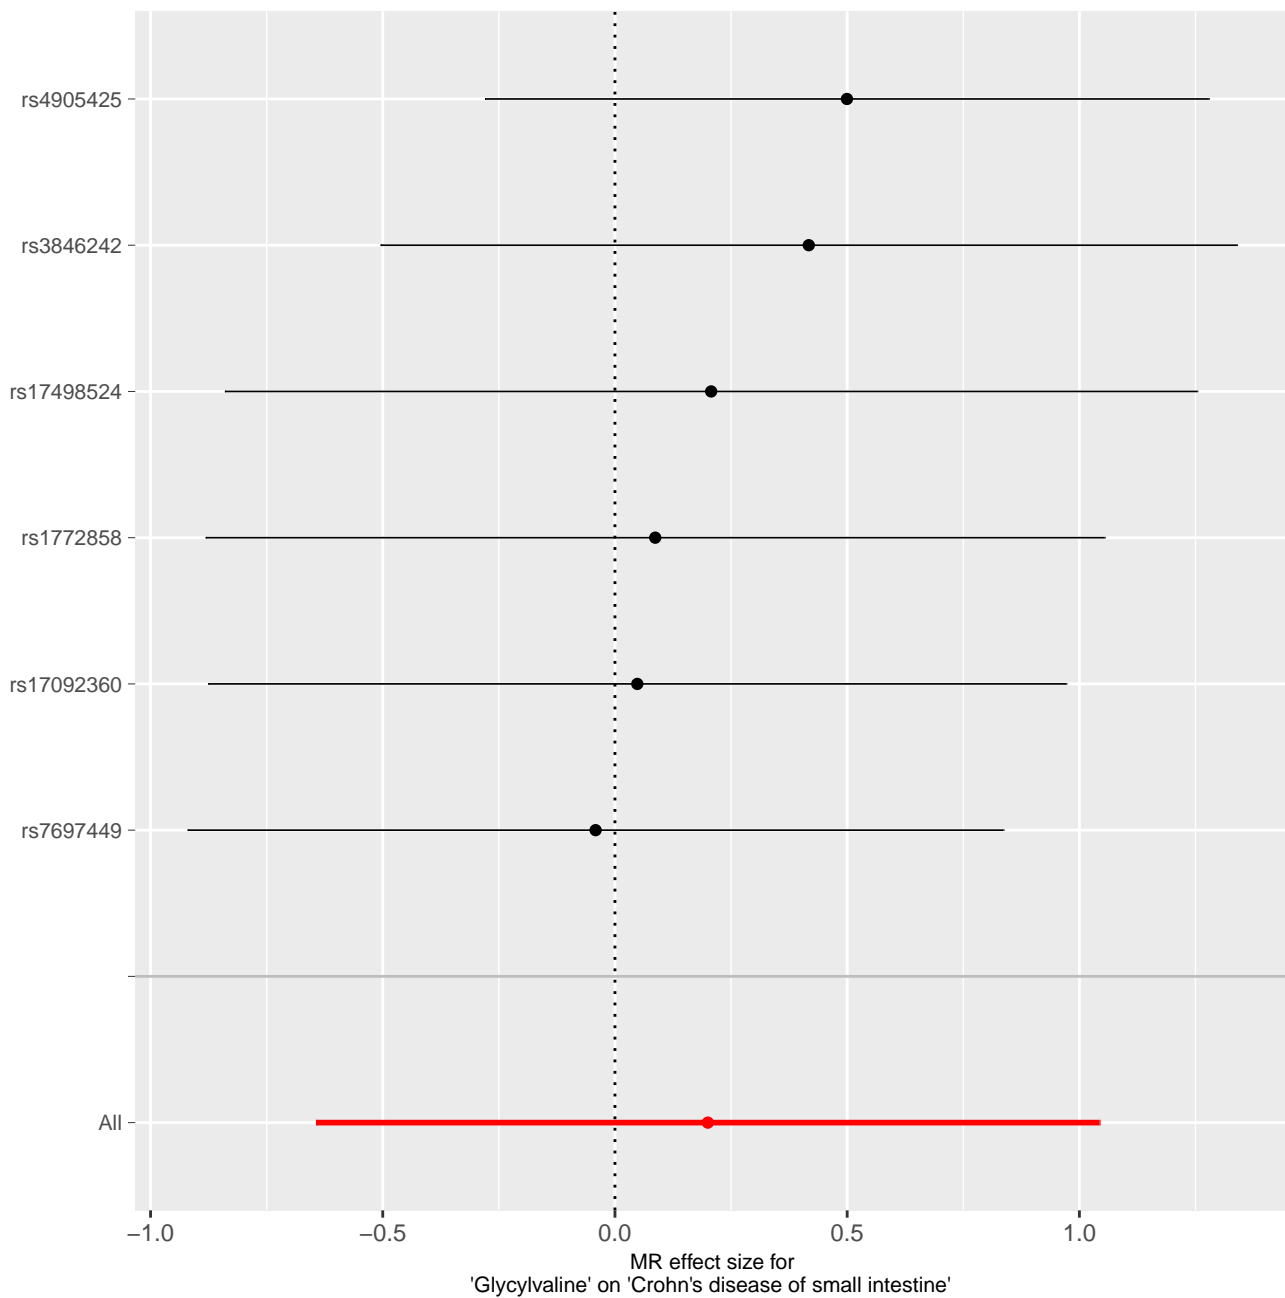



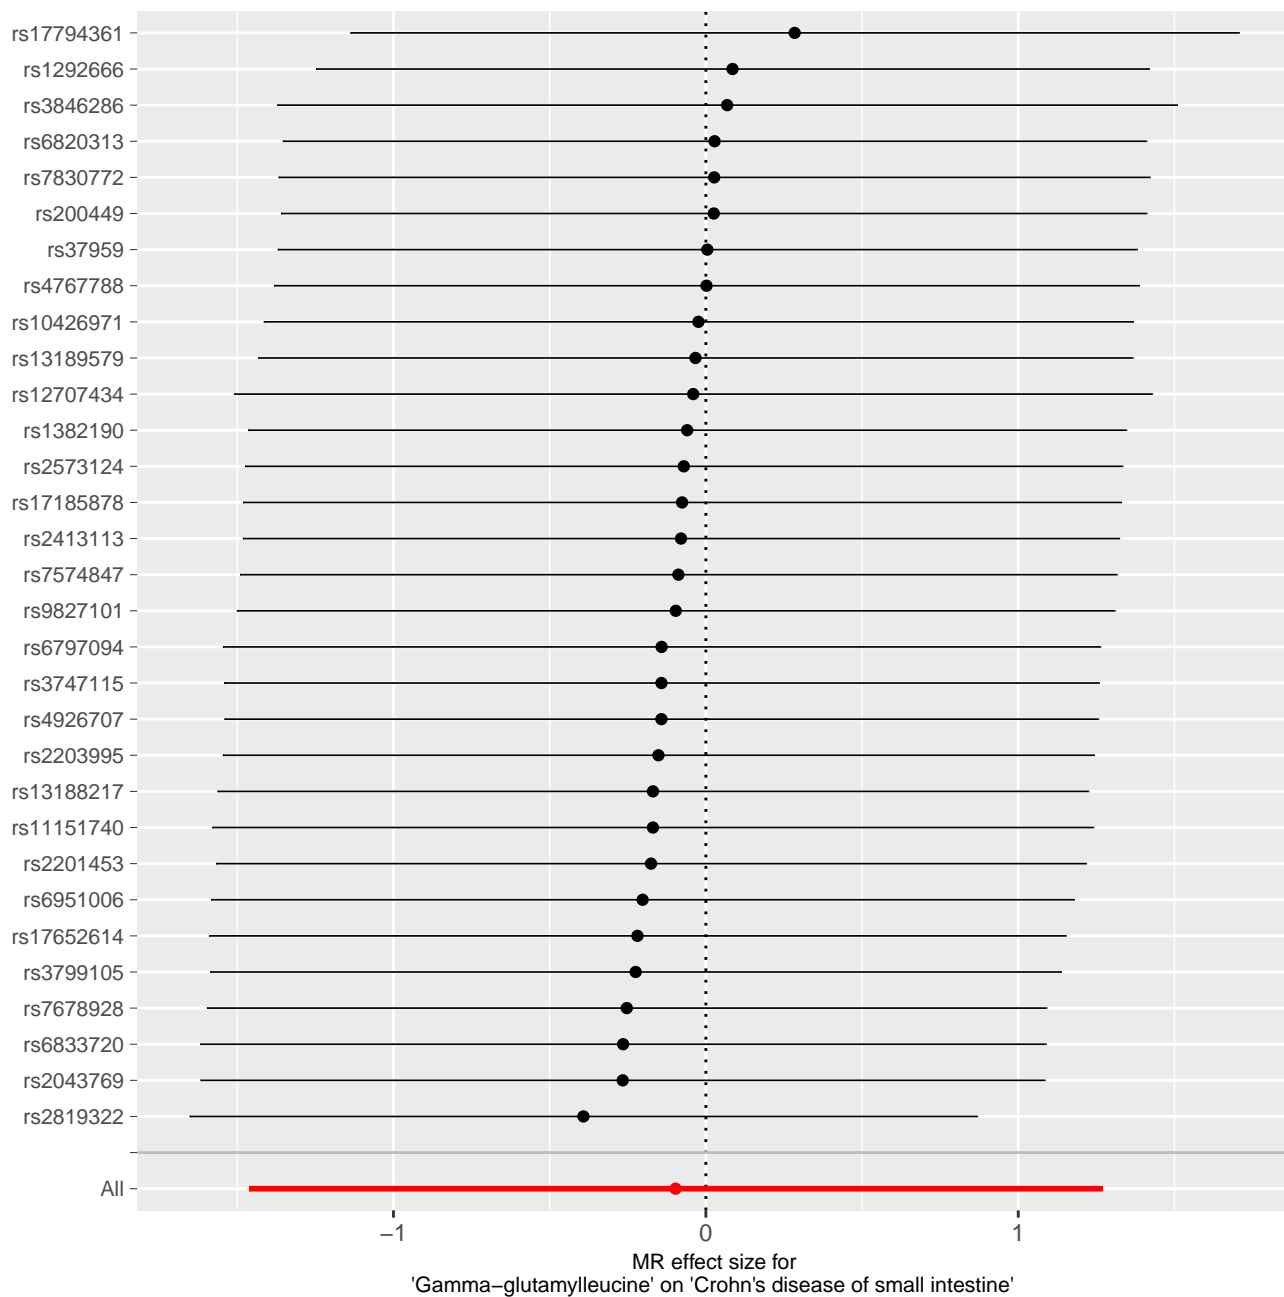

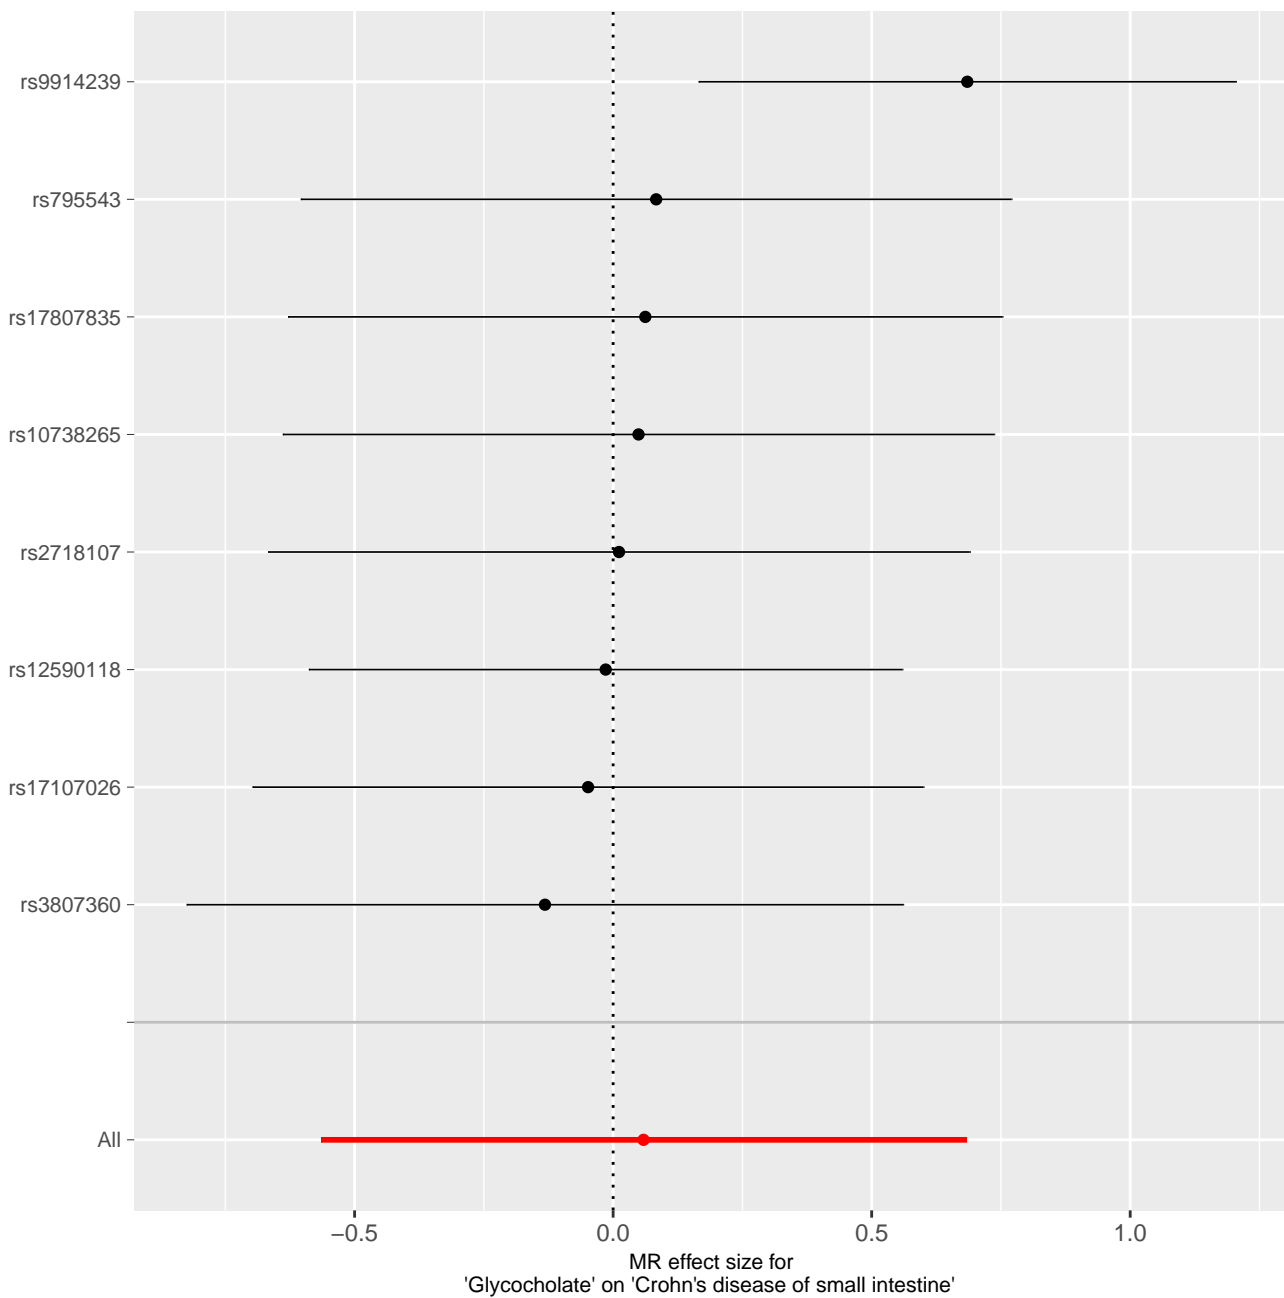

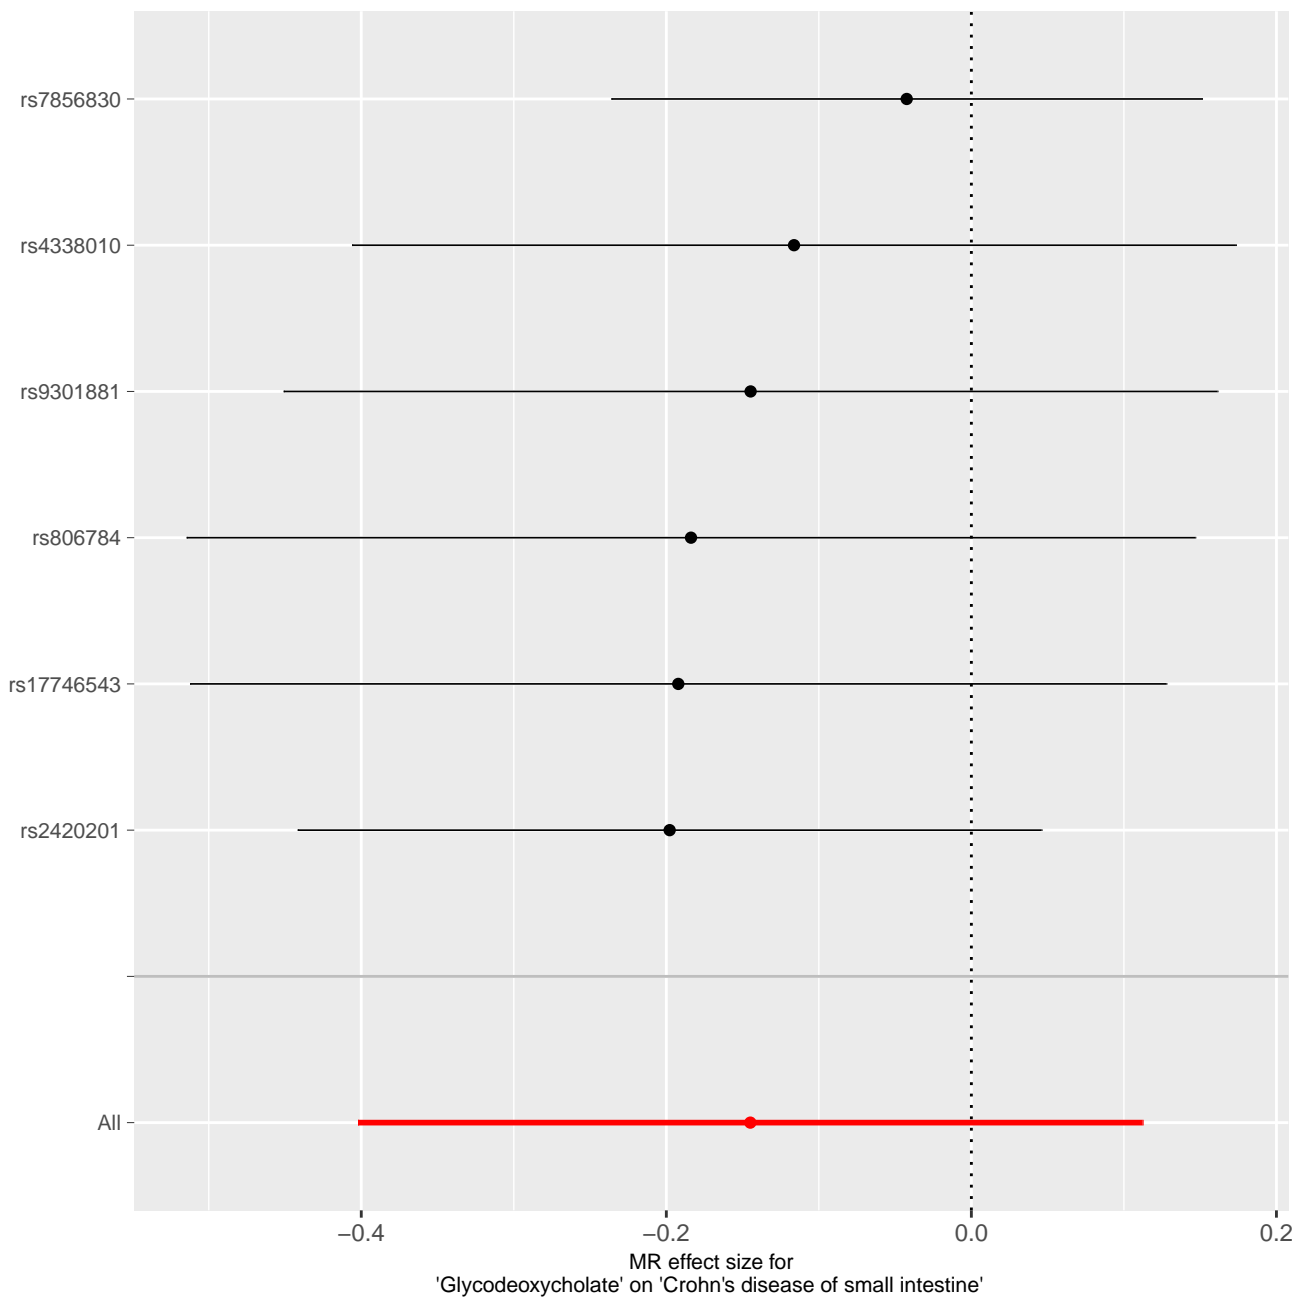

Batch 643 : Taurochenodeoxycholate on Crohn's disease of small intestine

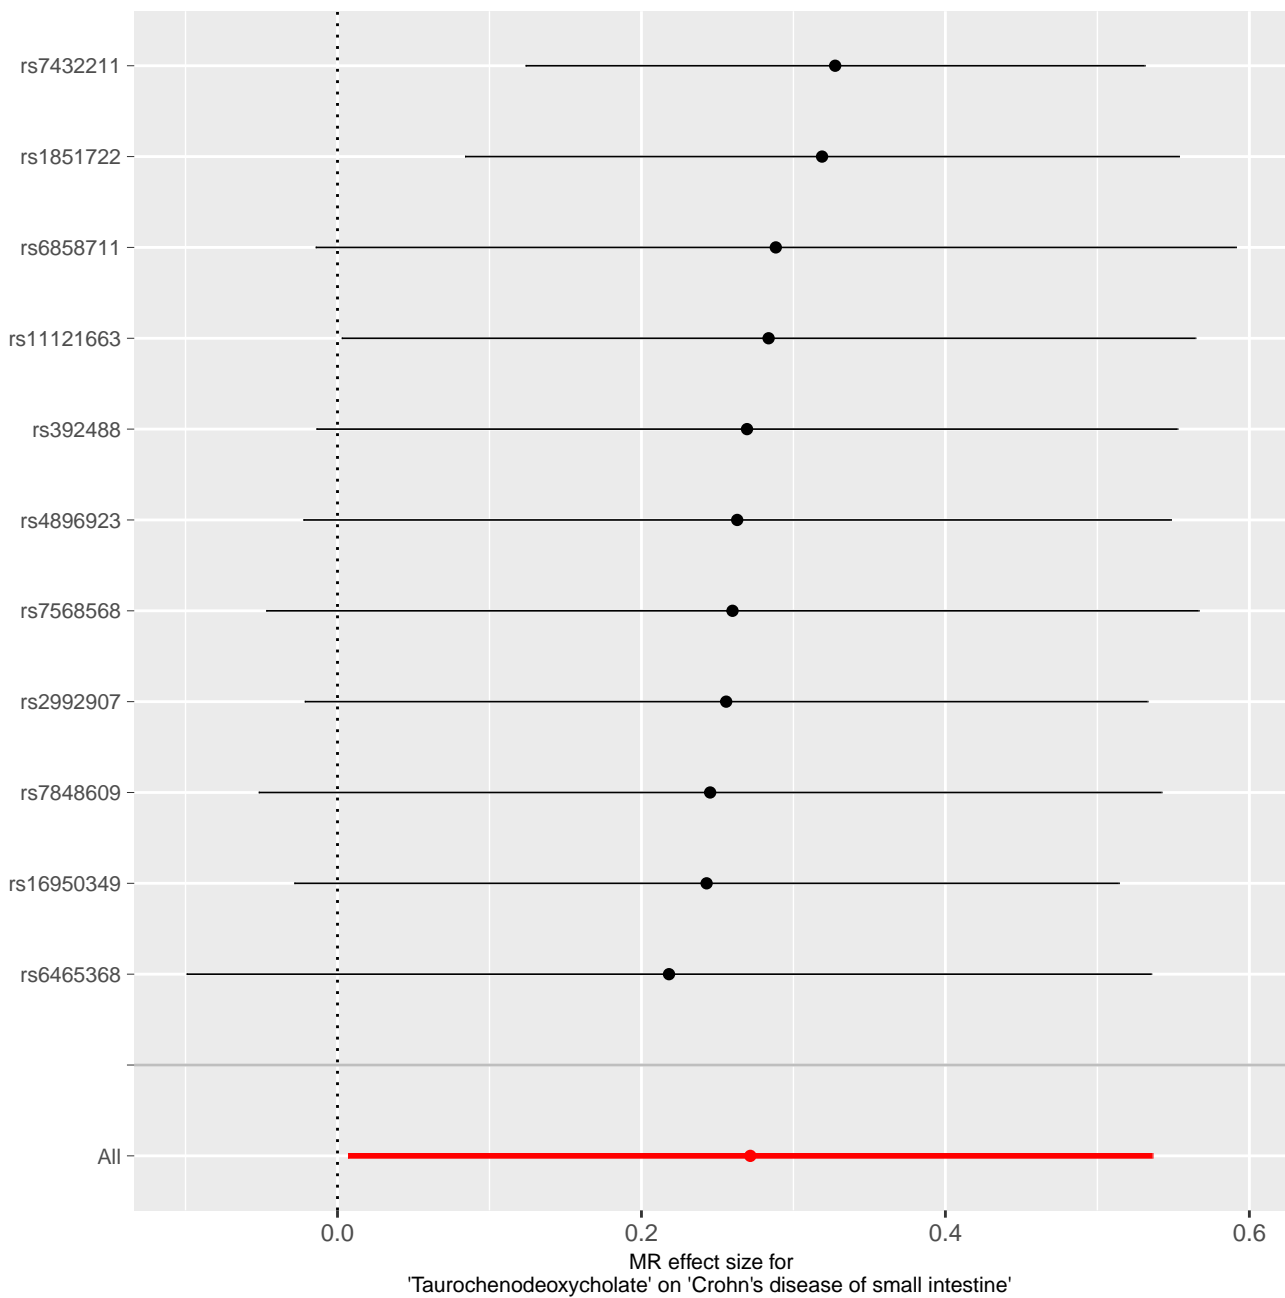

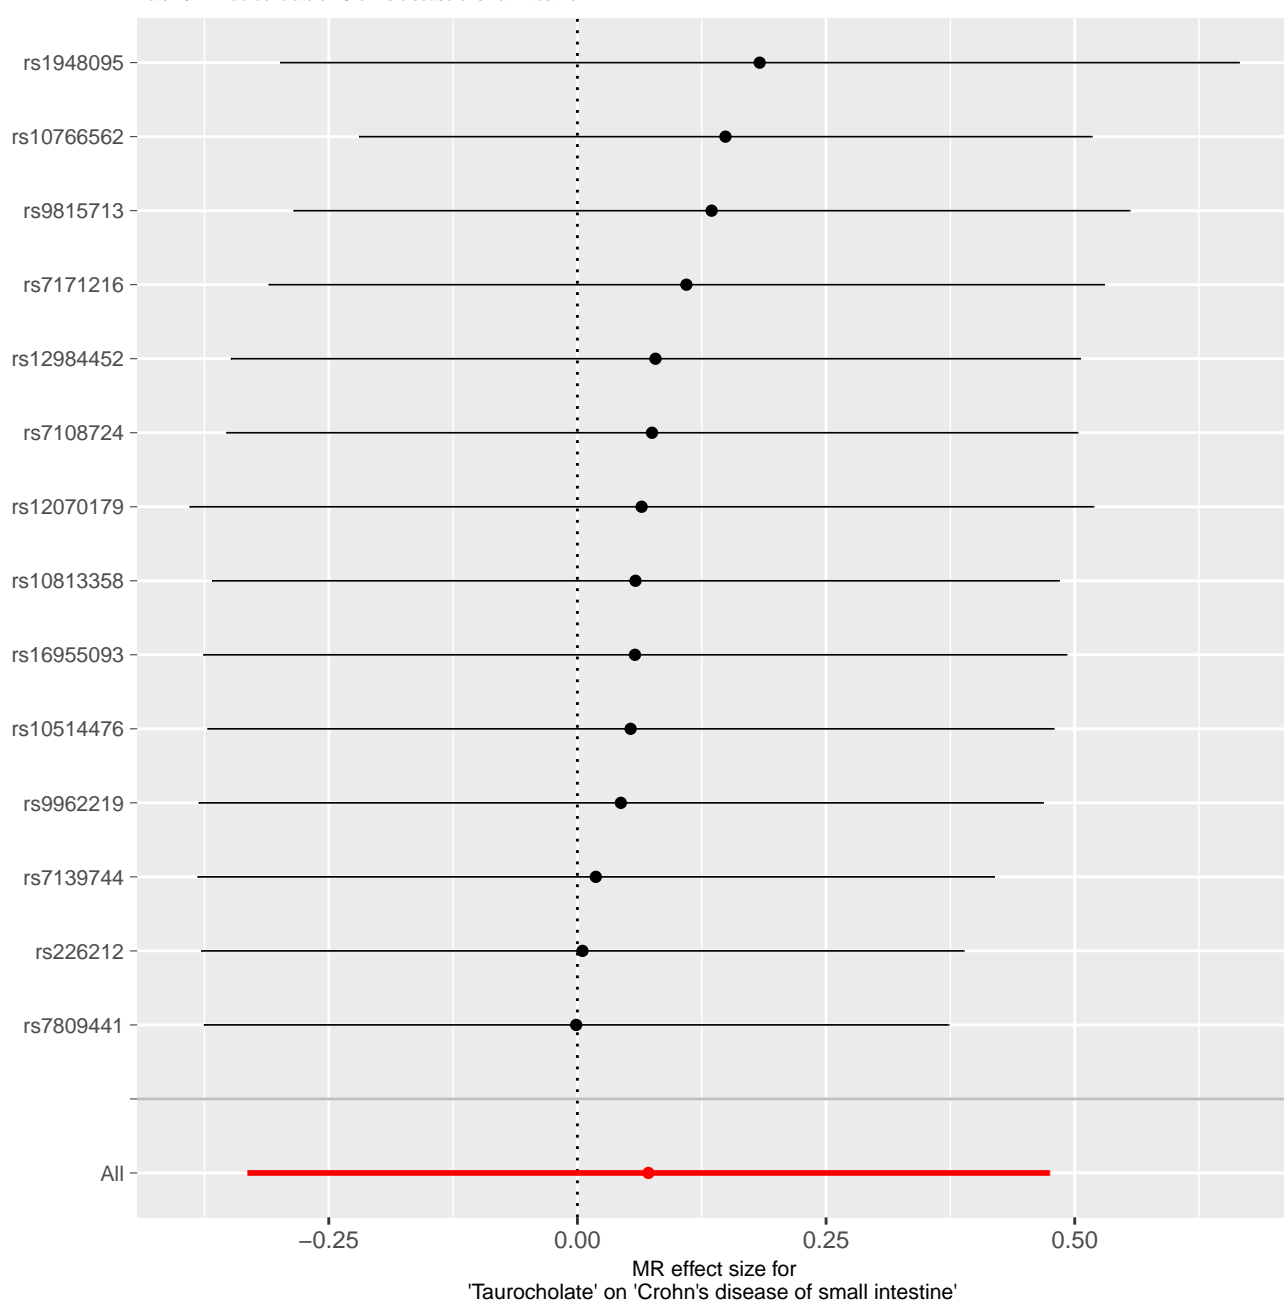

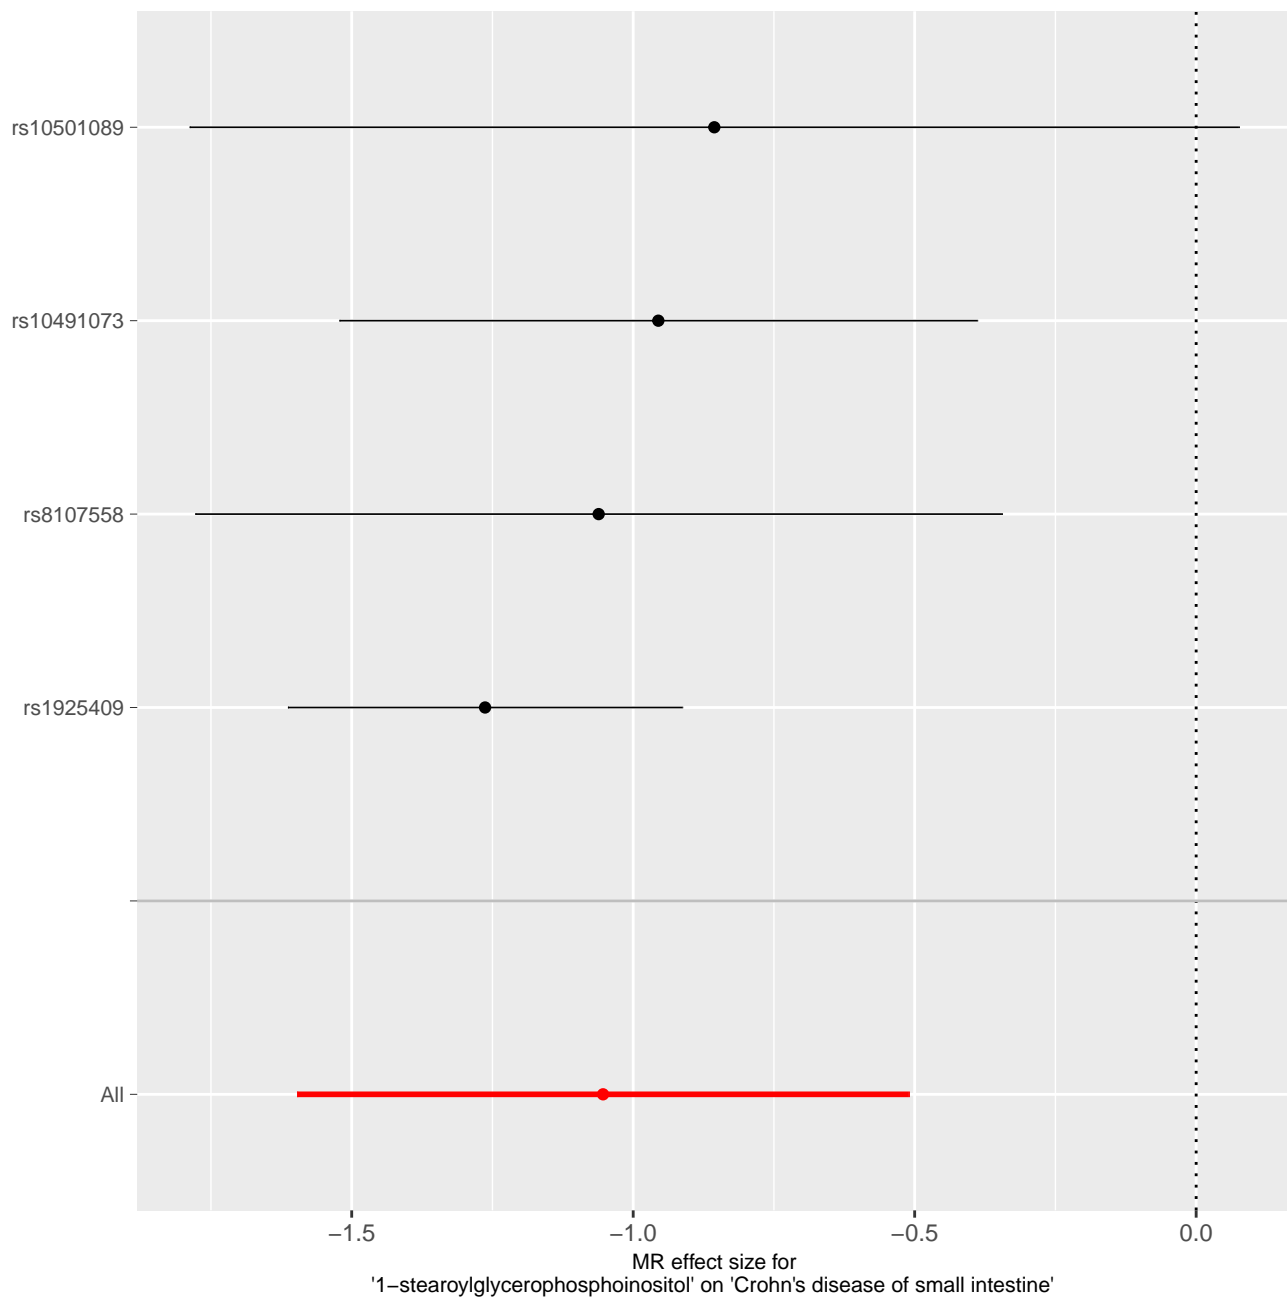

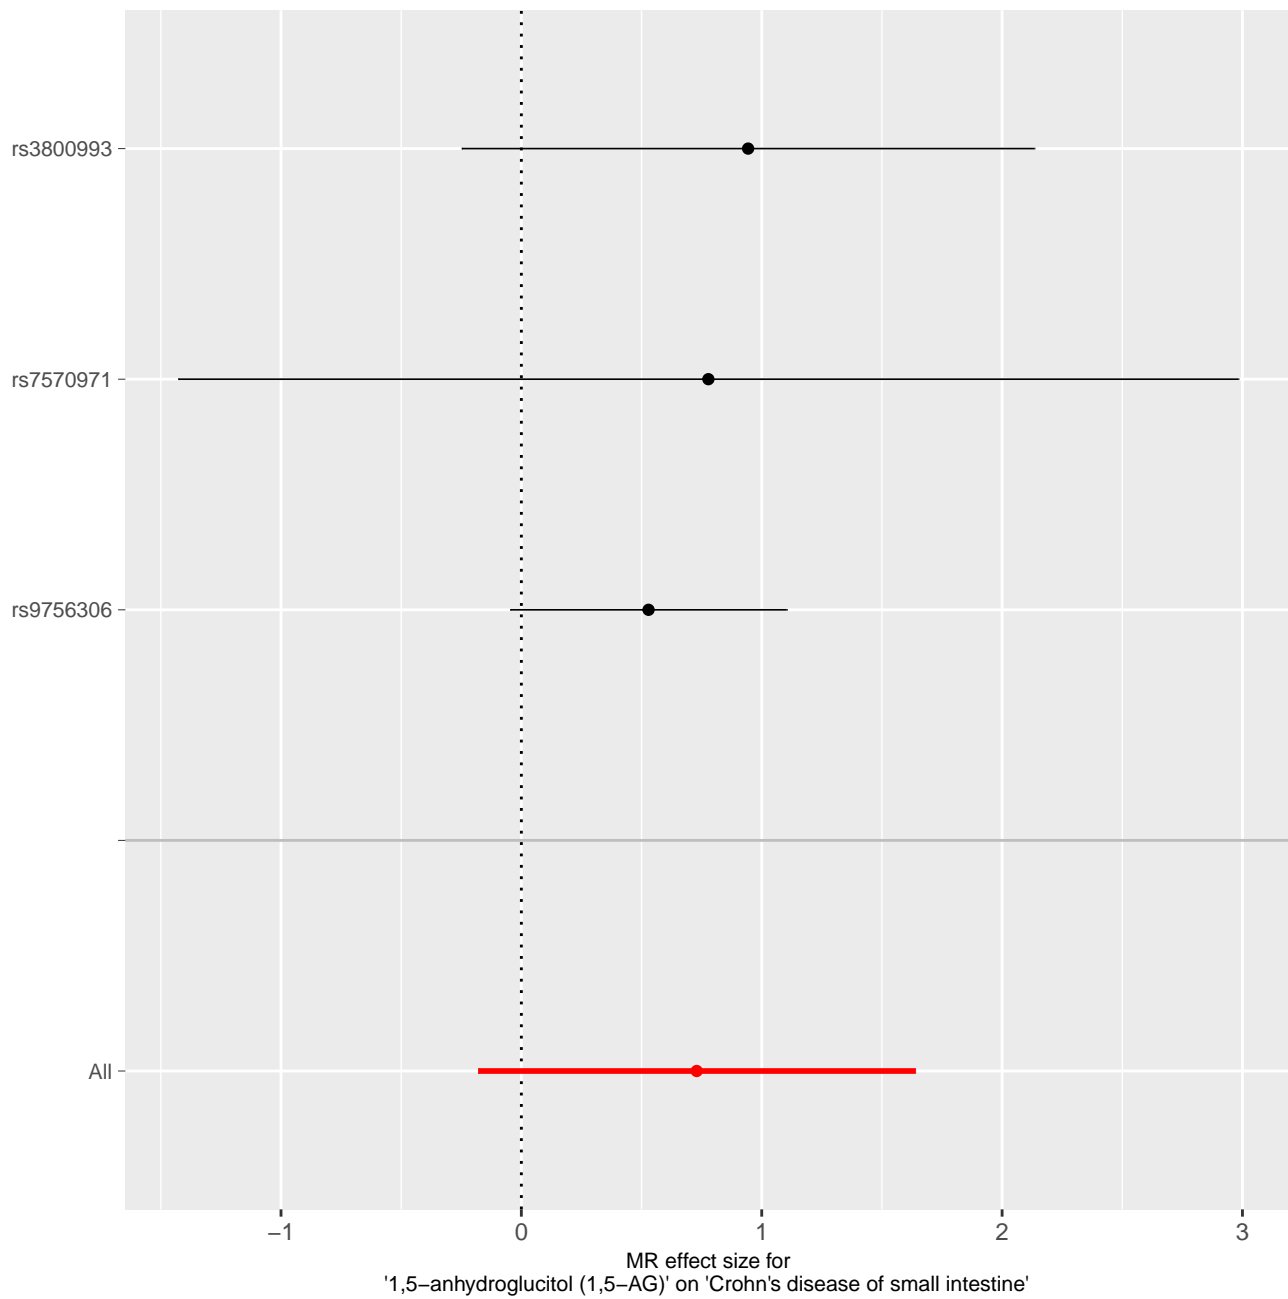

Batch 650 : 2-hydroxybutyrate (AHB) on Crohn's disease of small intestine

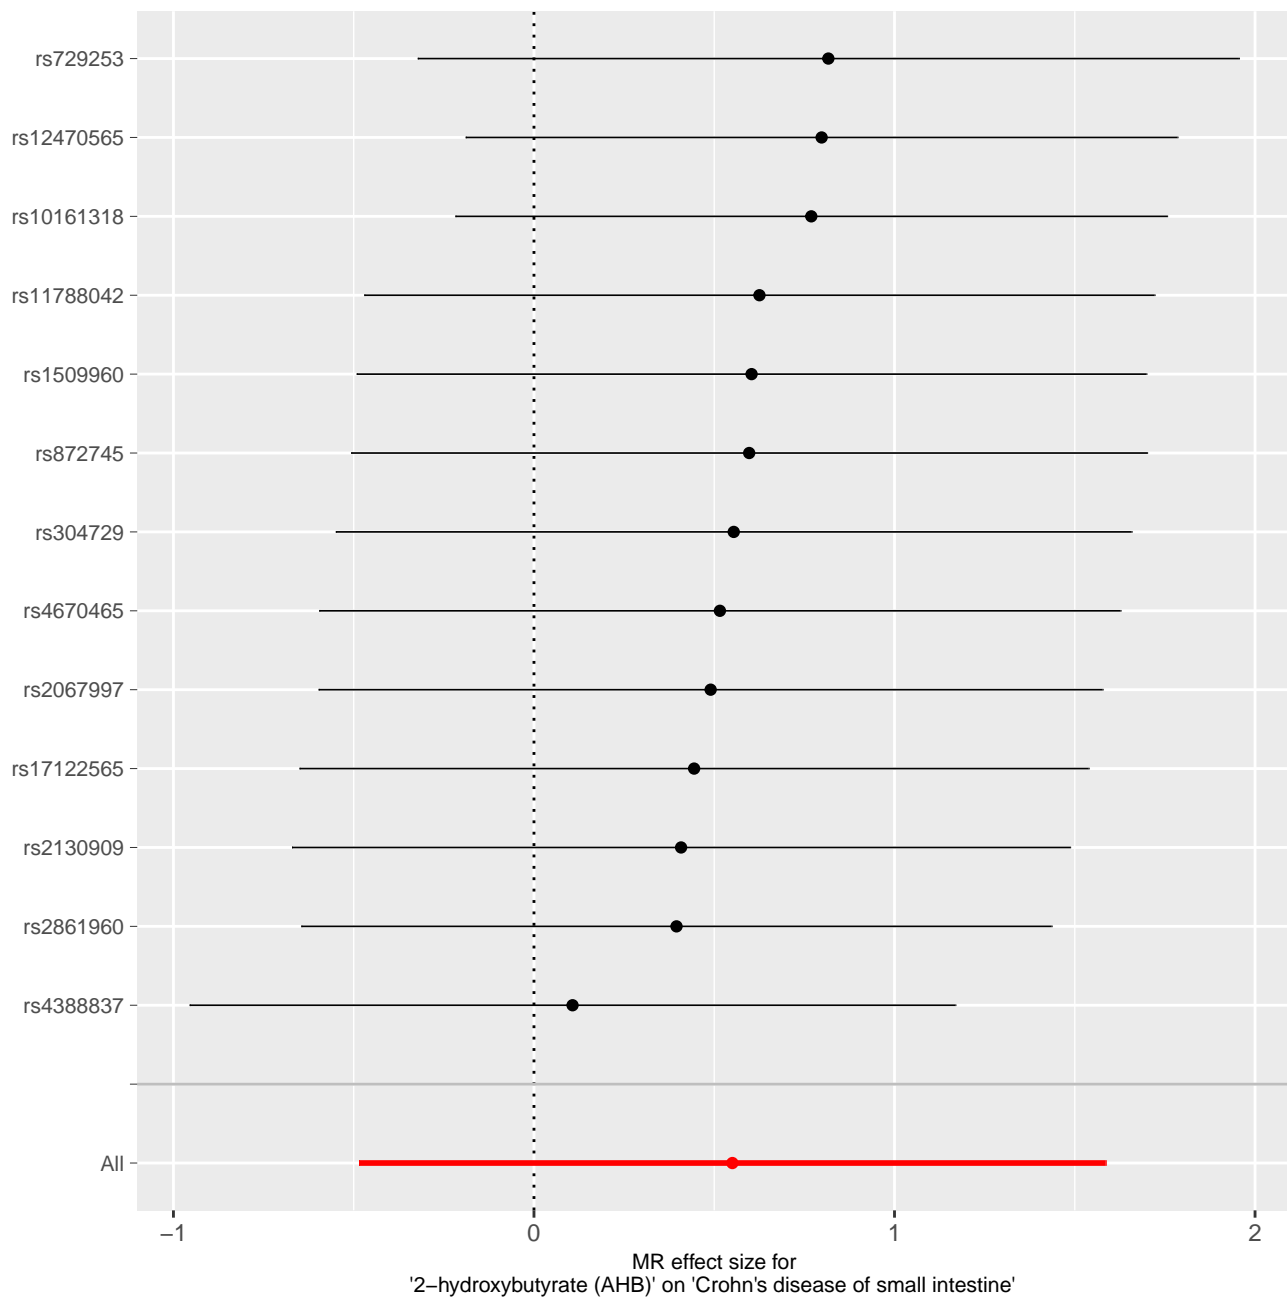



Batch 653 : 1-palmitoylglycerol (1-monopalmitin) on Crohn's disease of small intestine

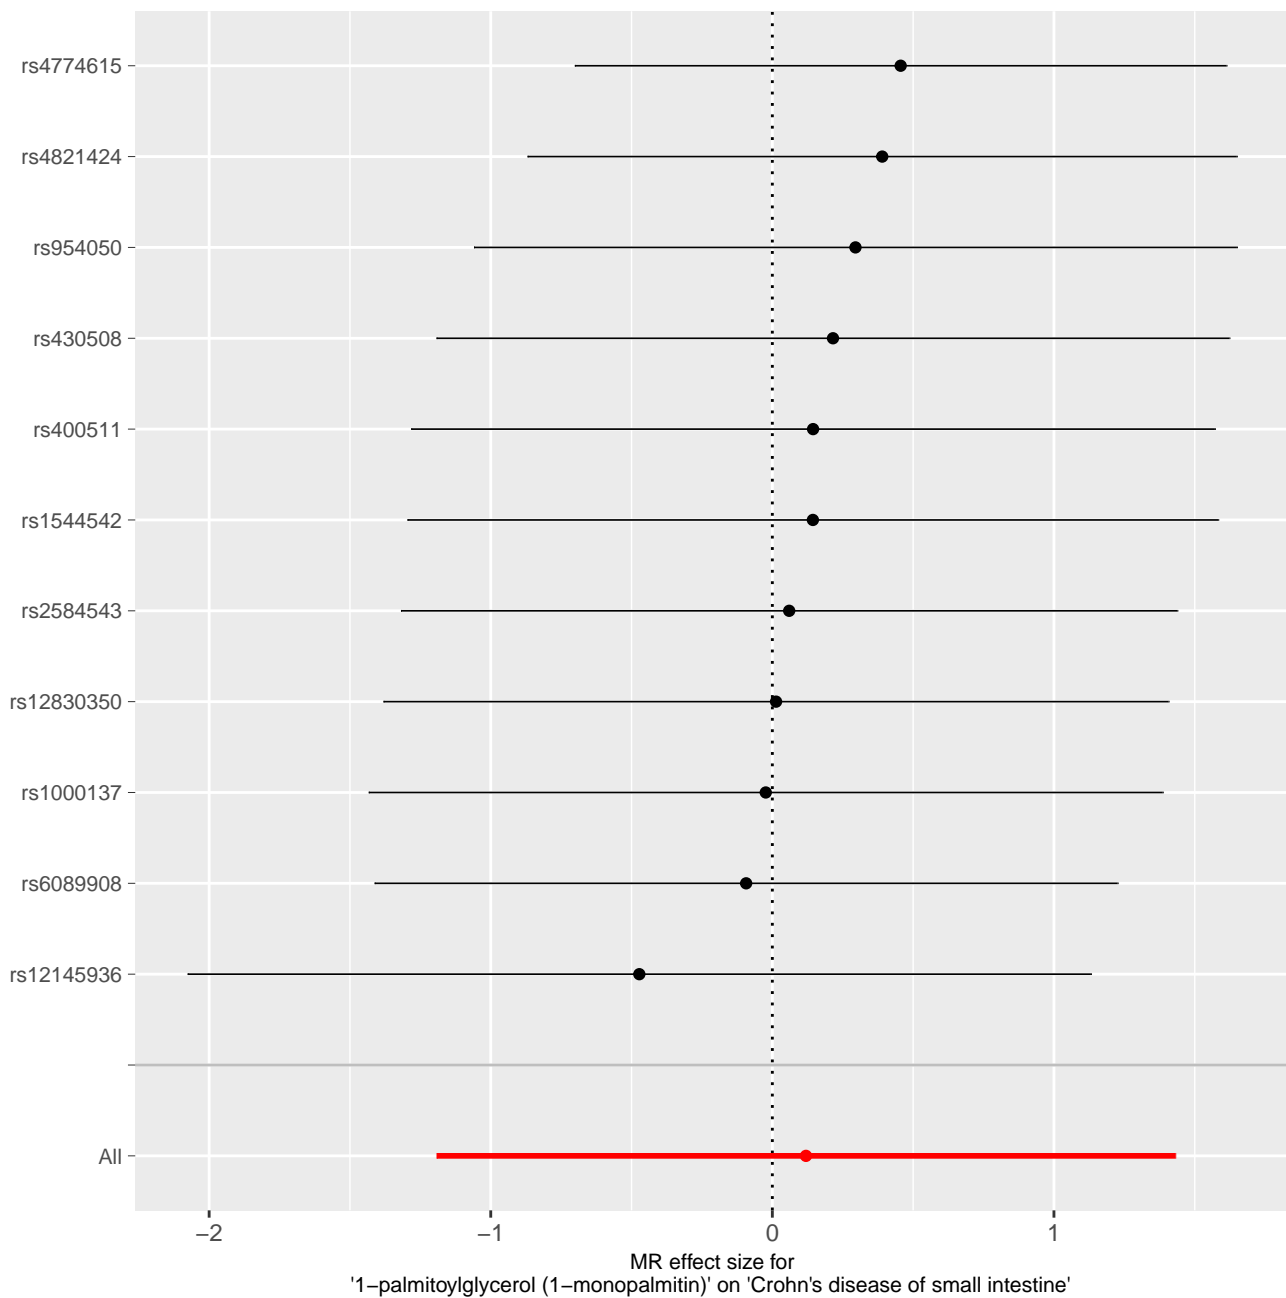

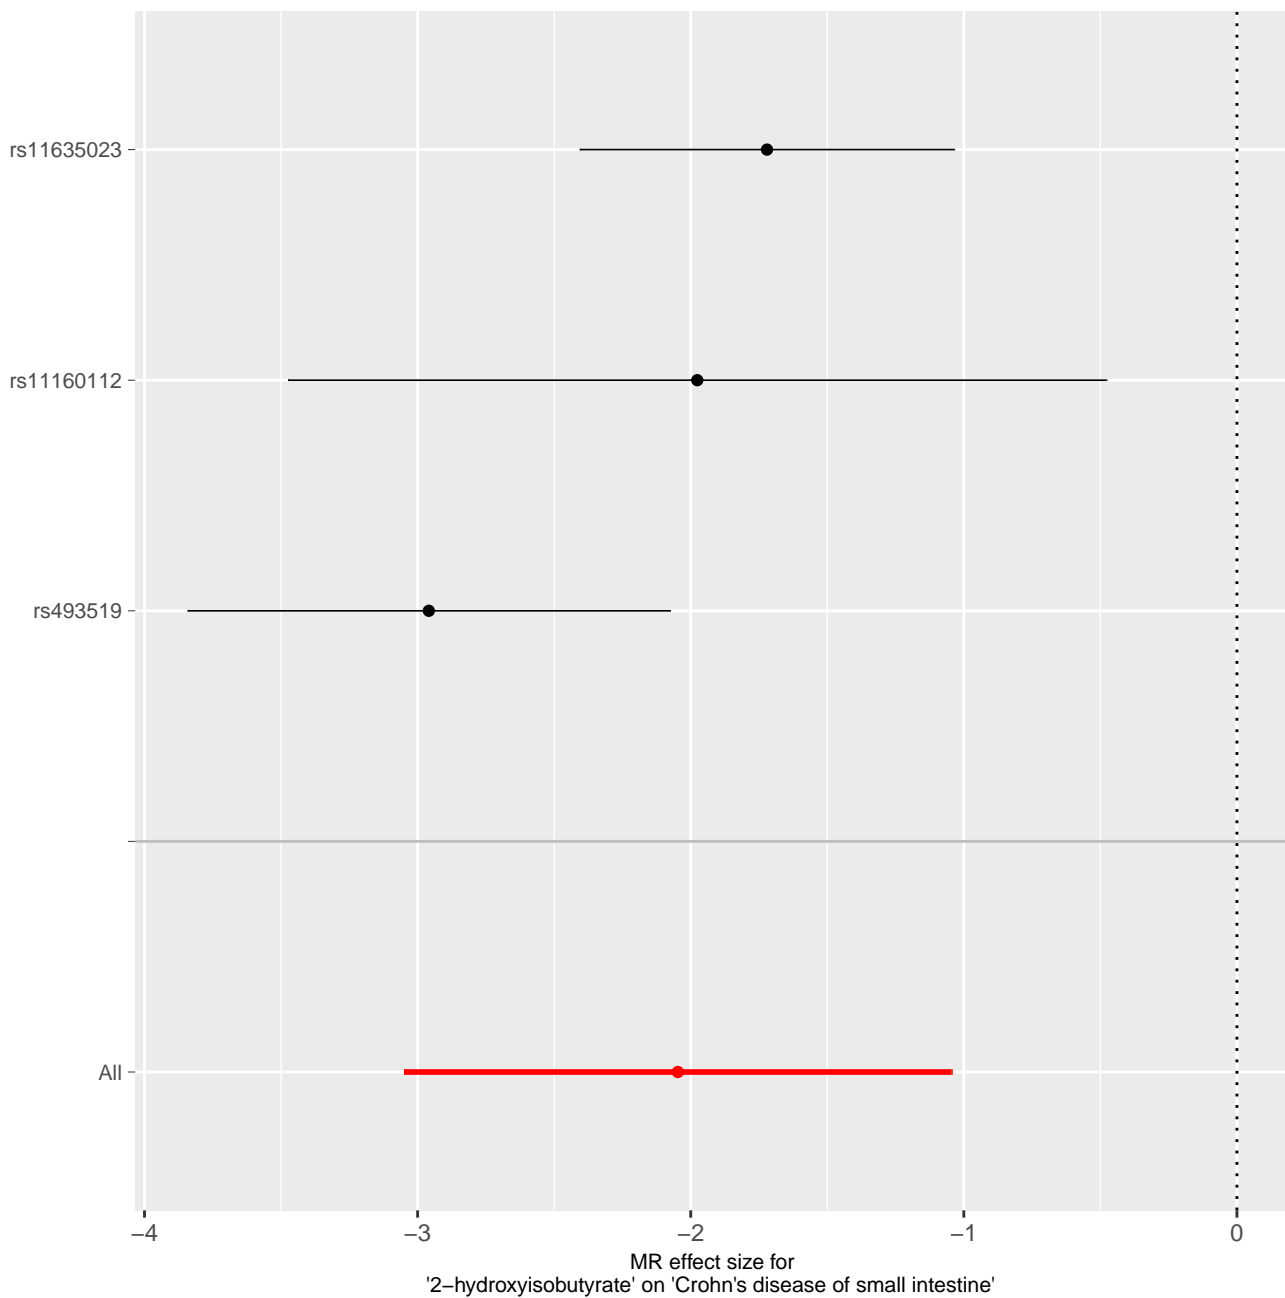

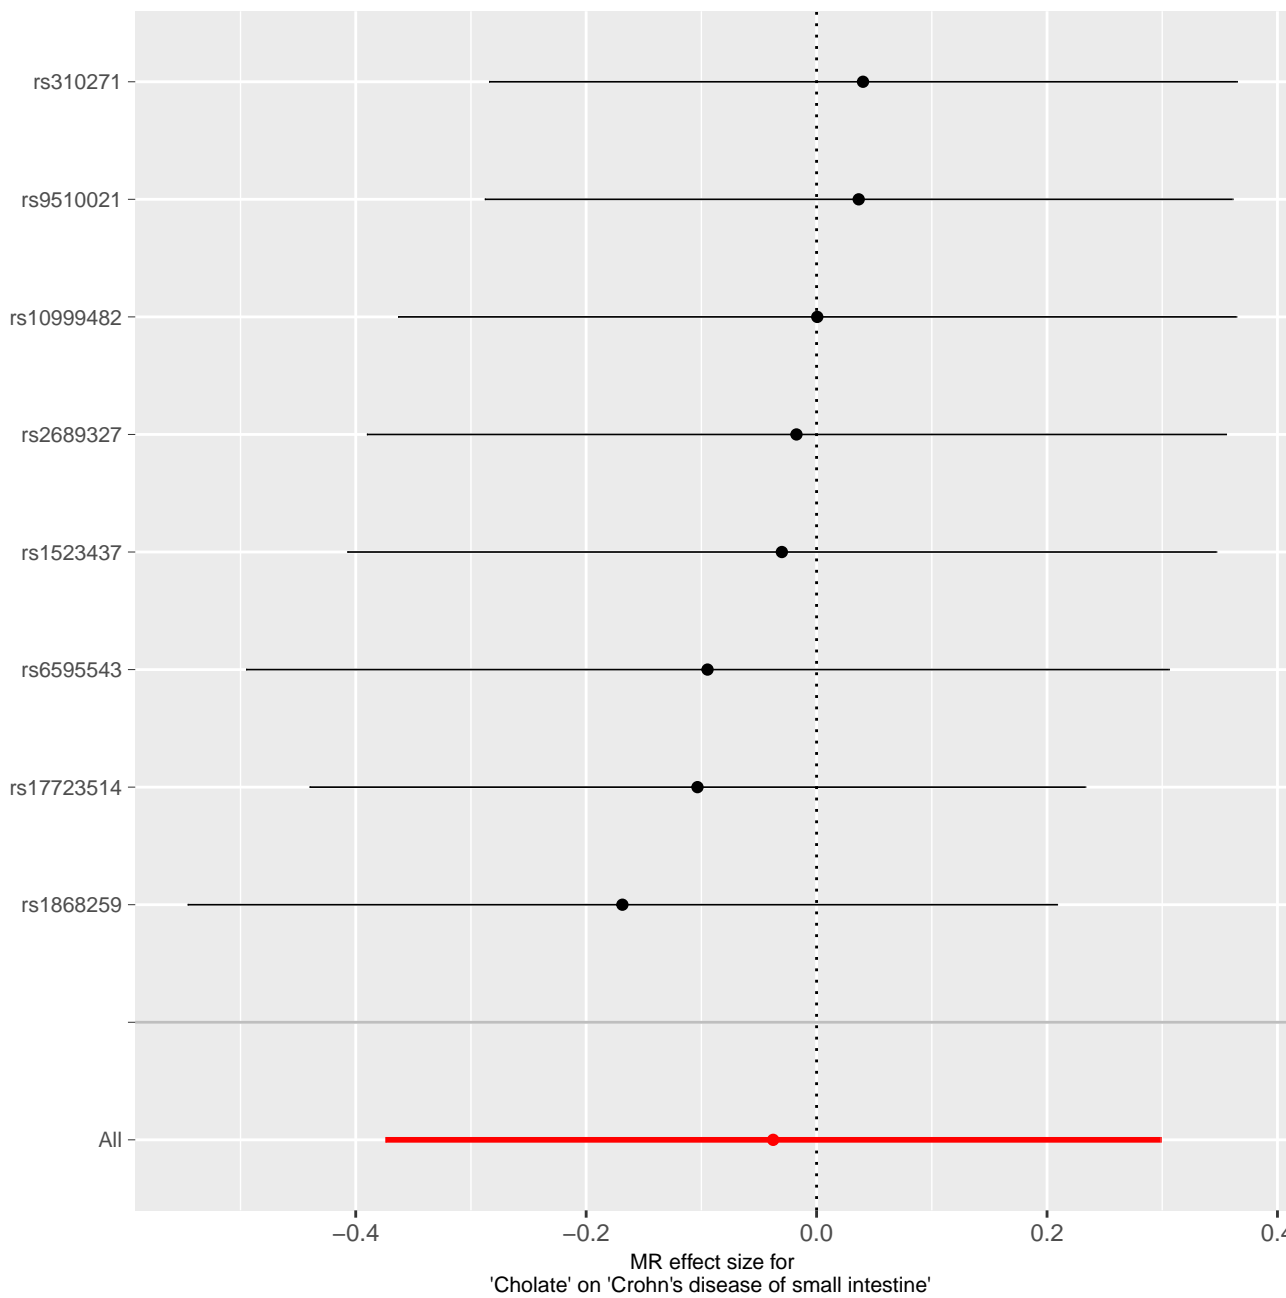

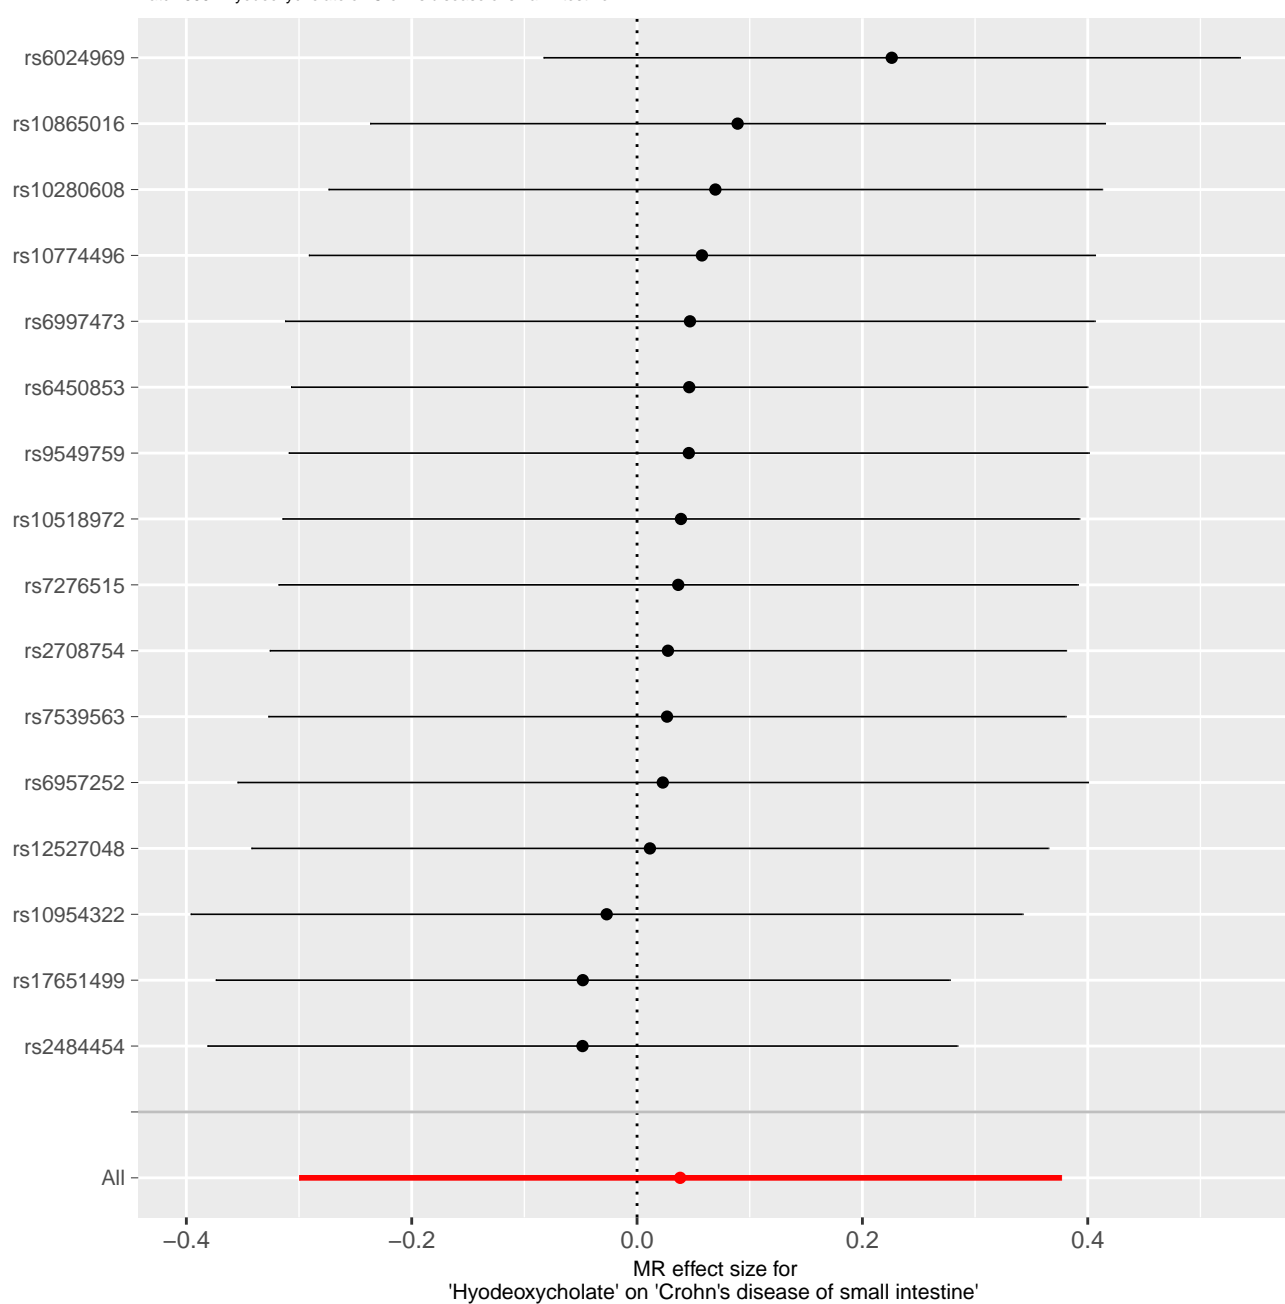

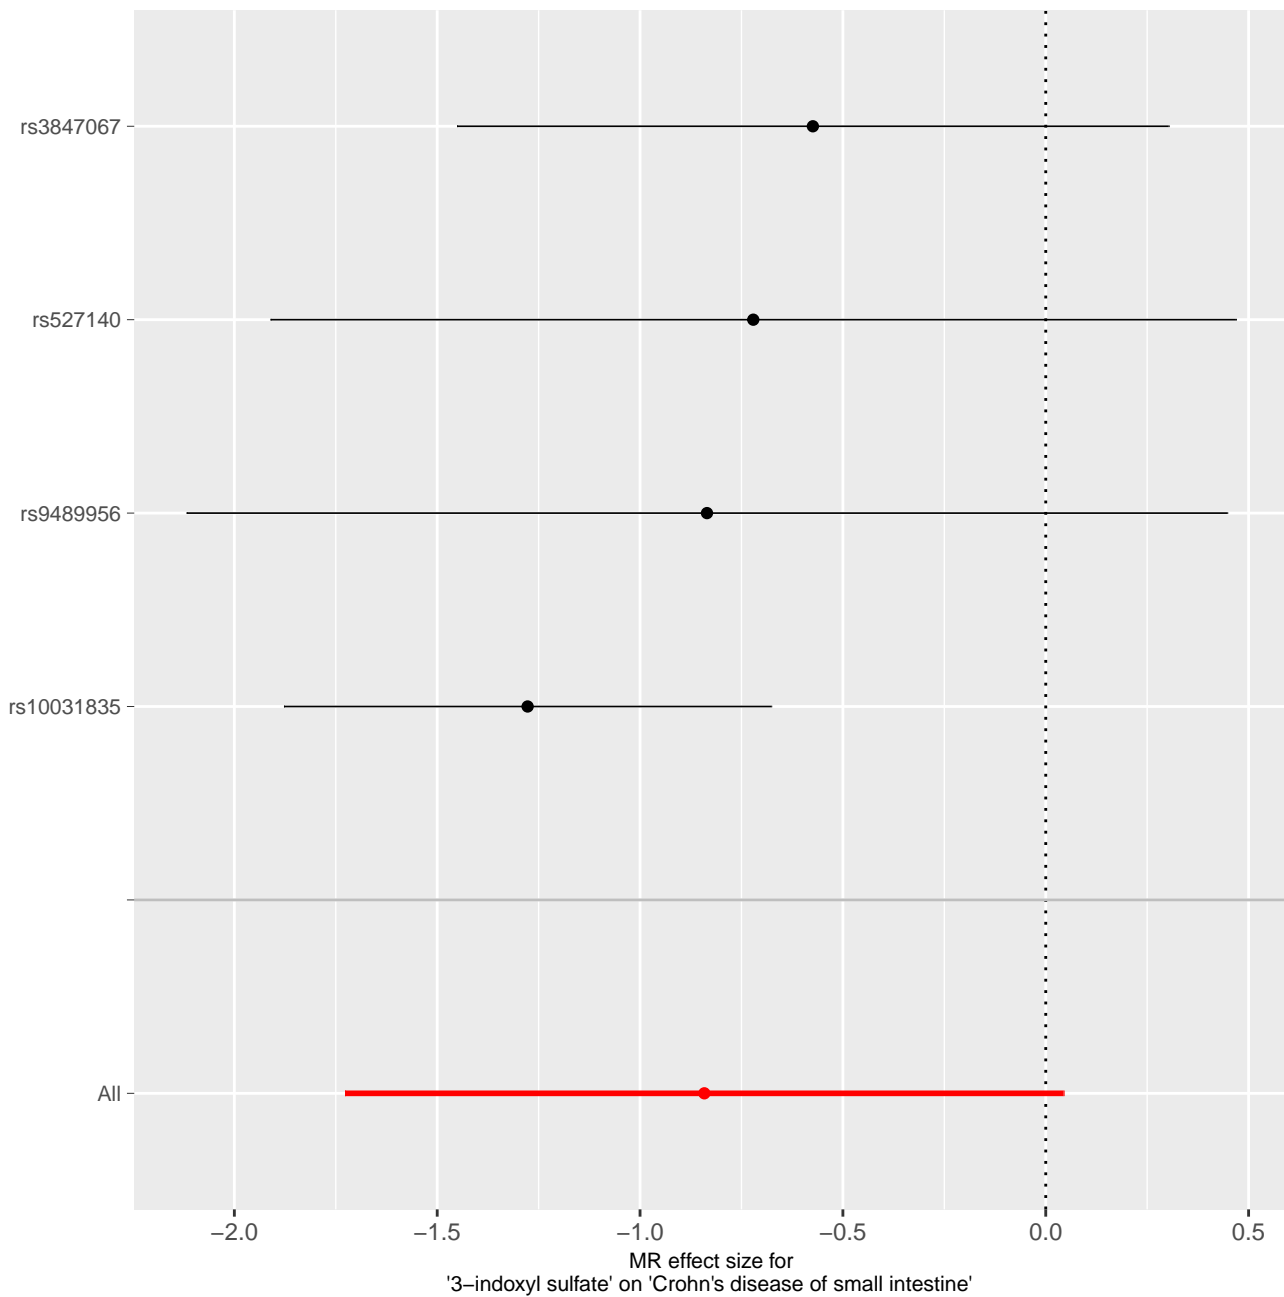

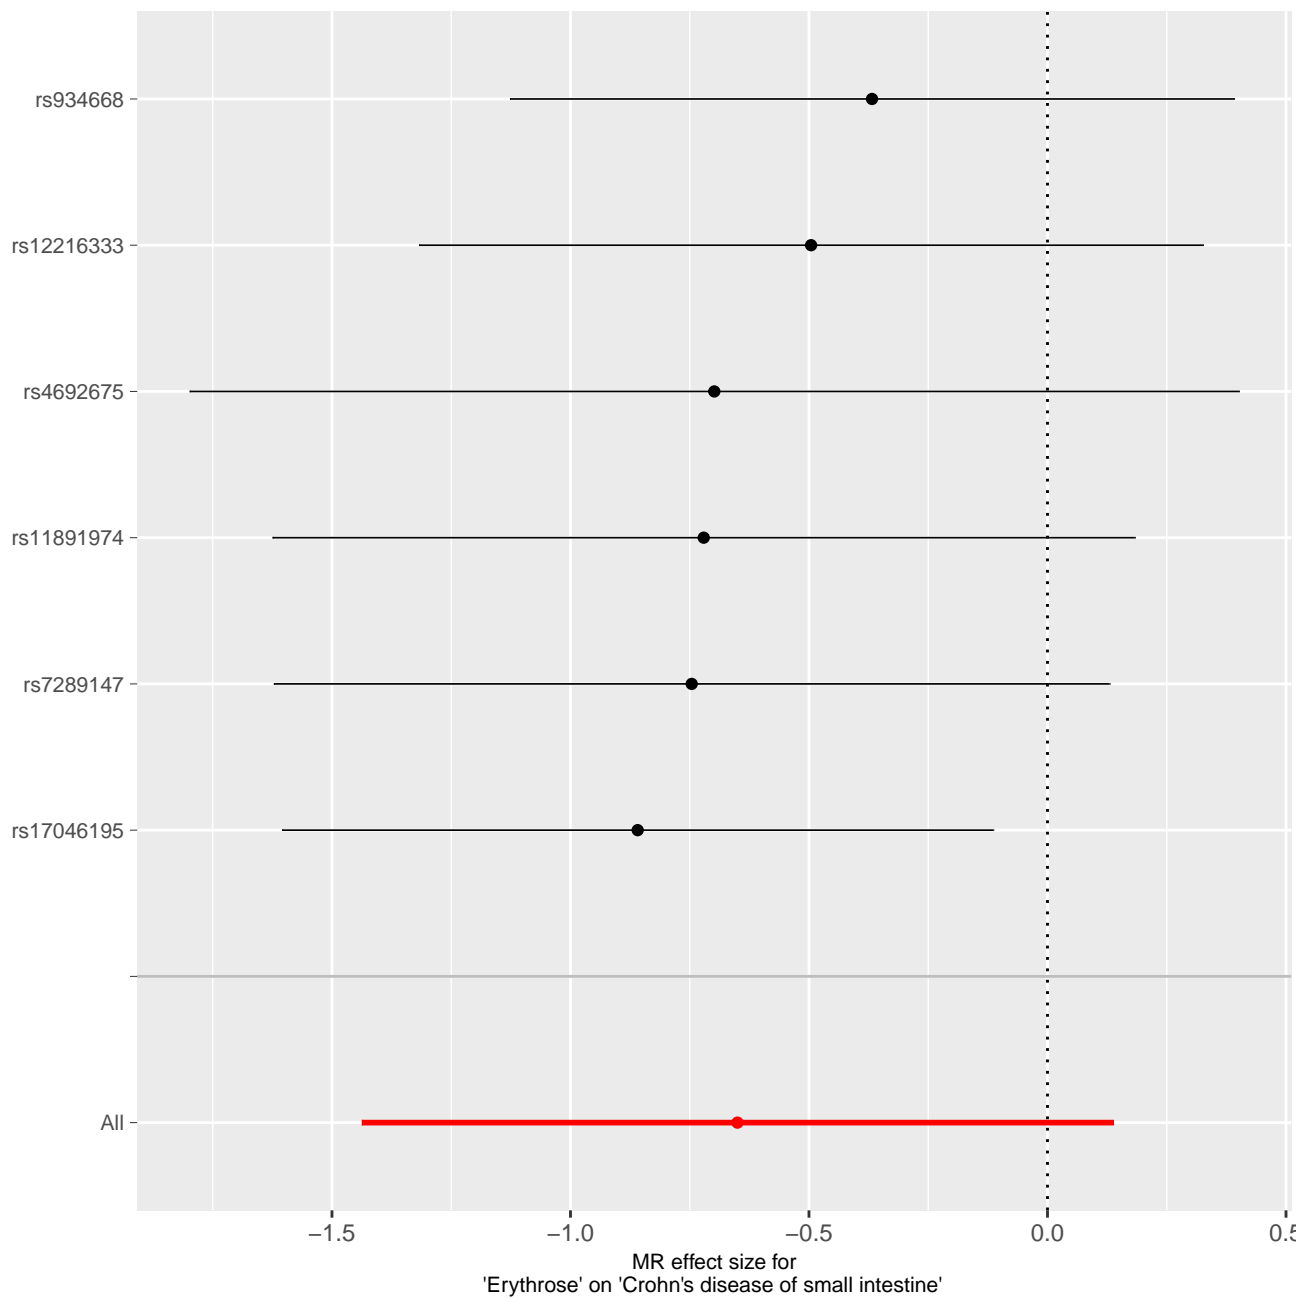

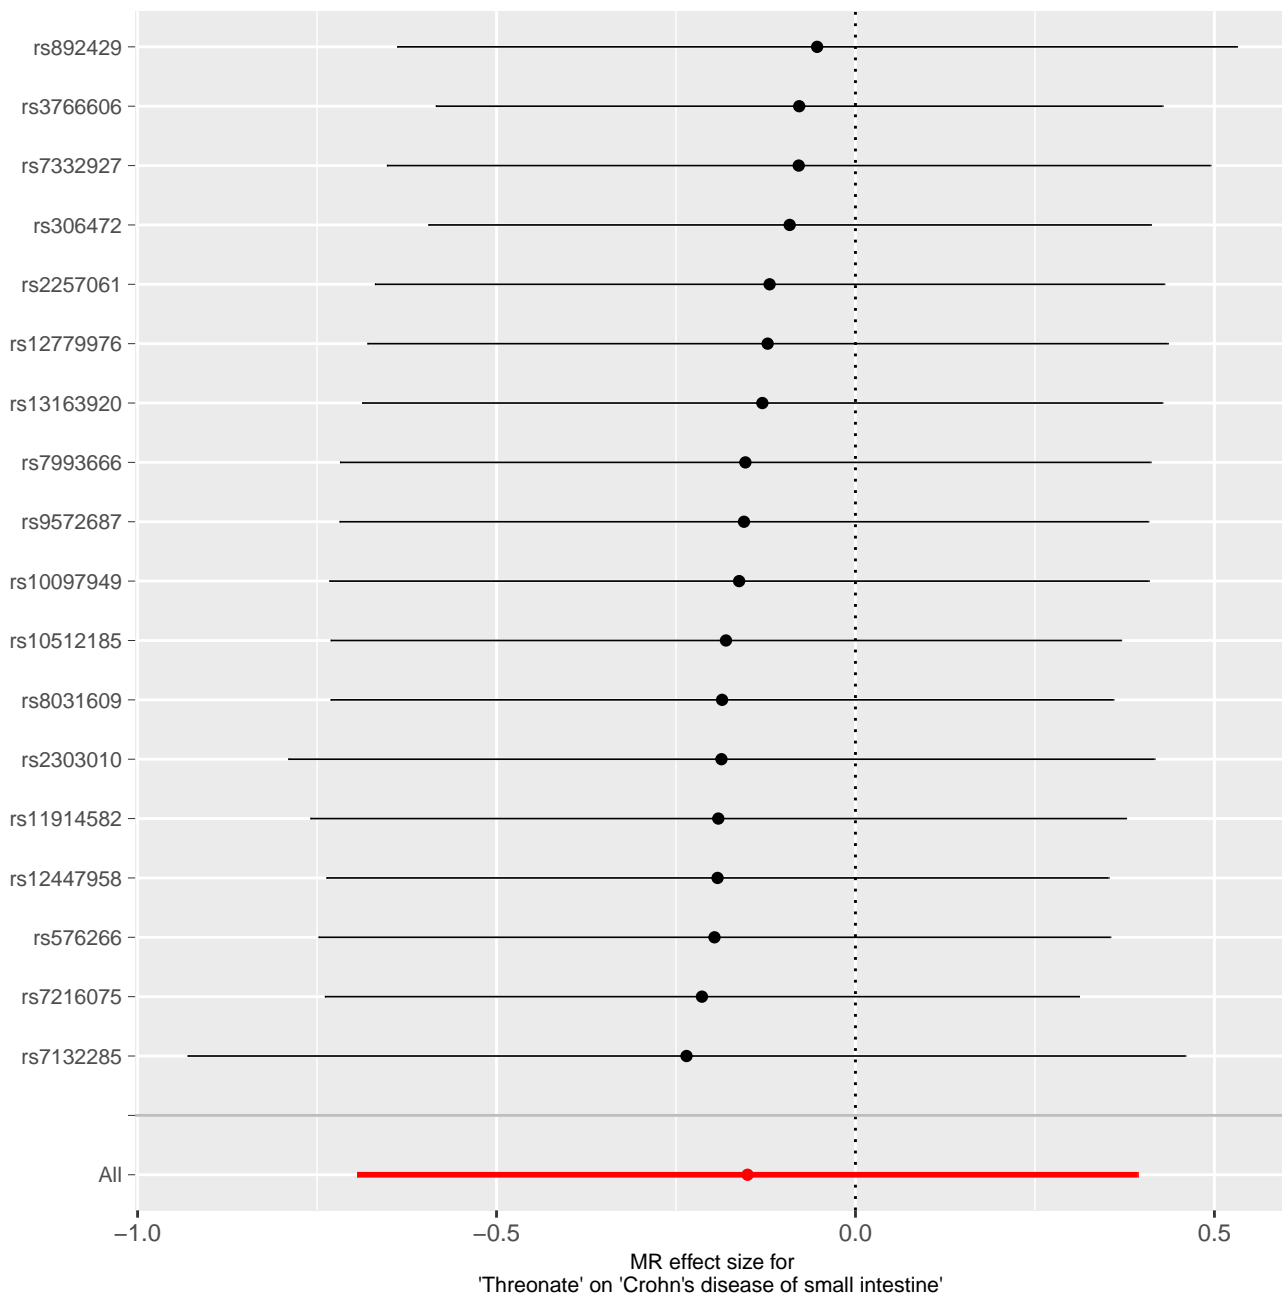

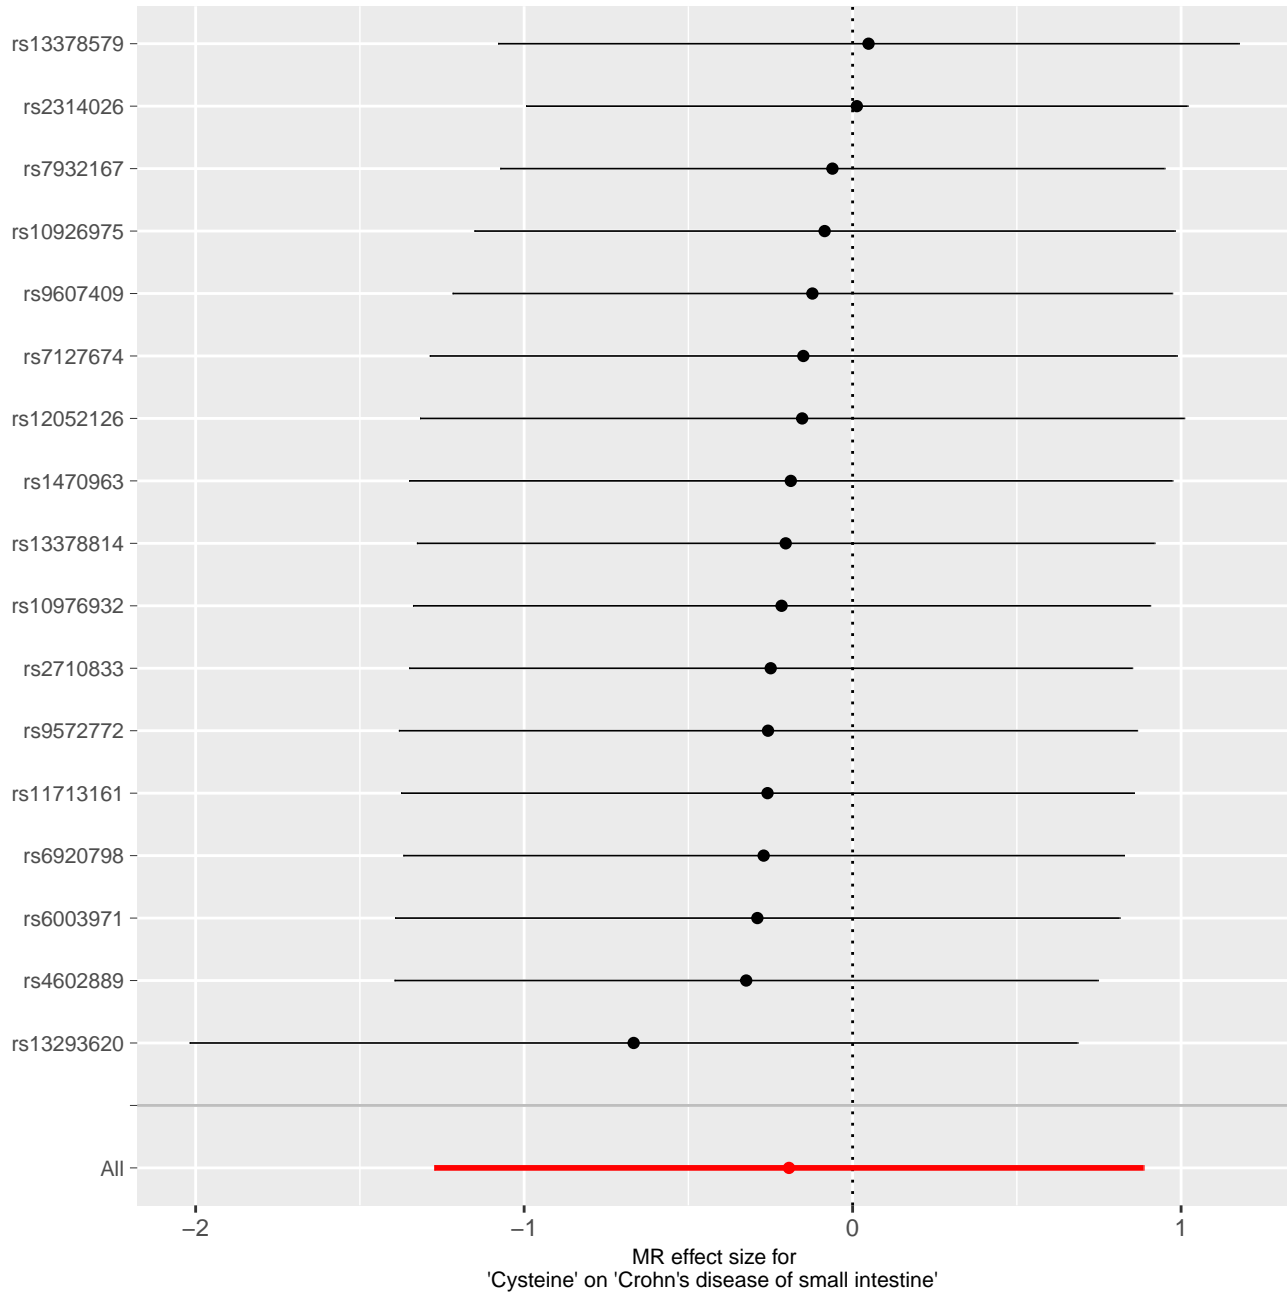



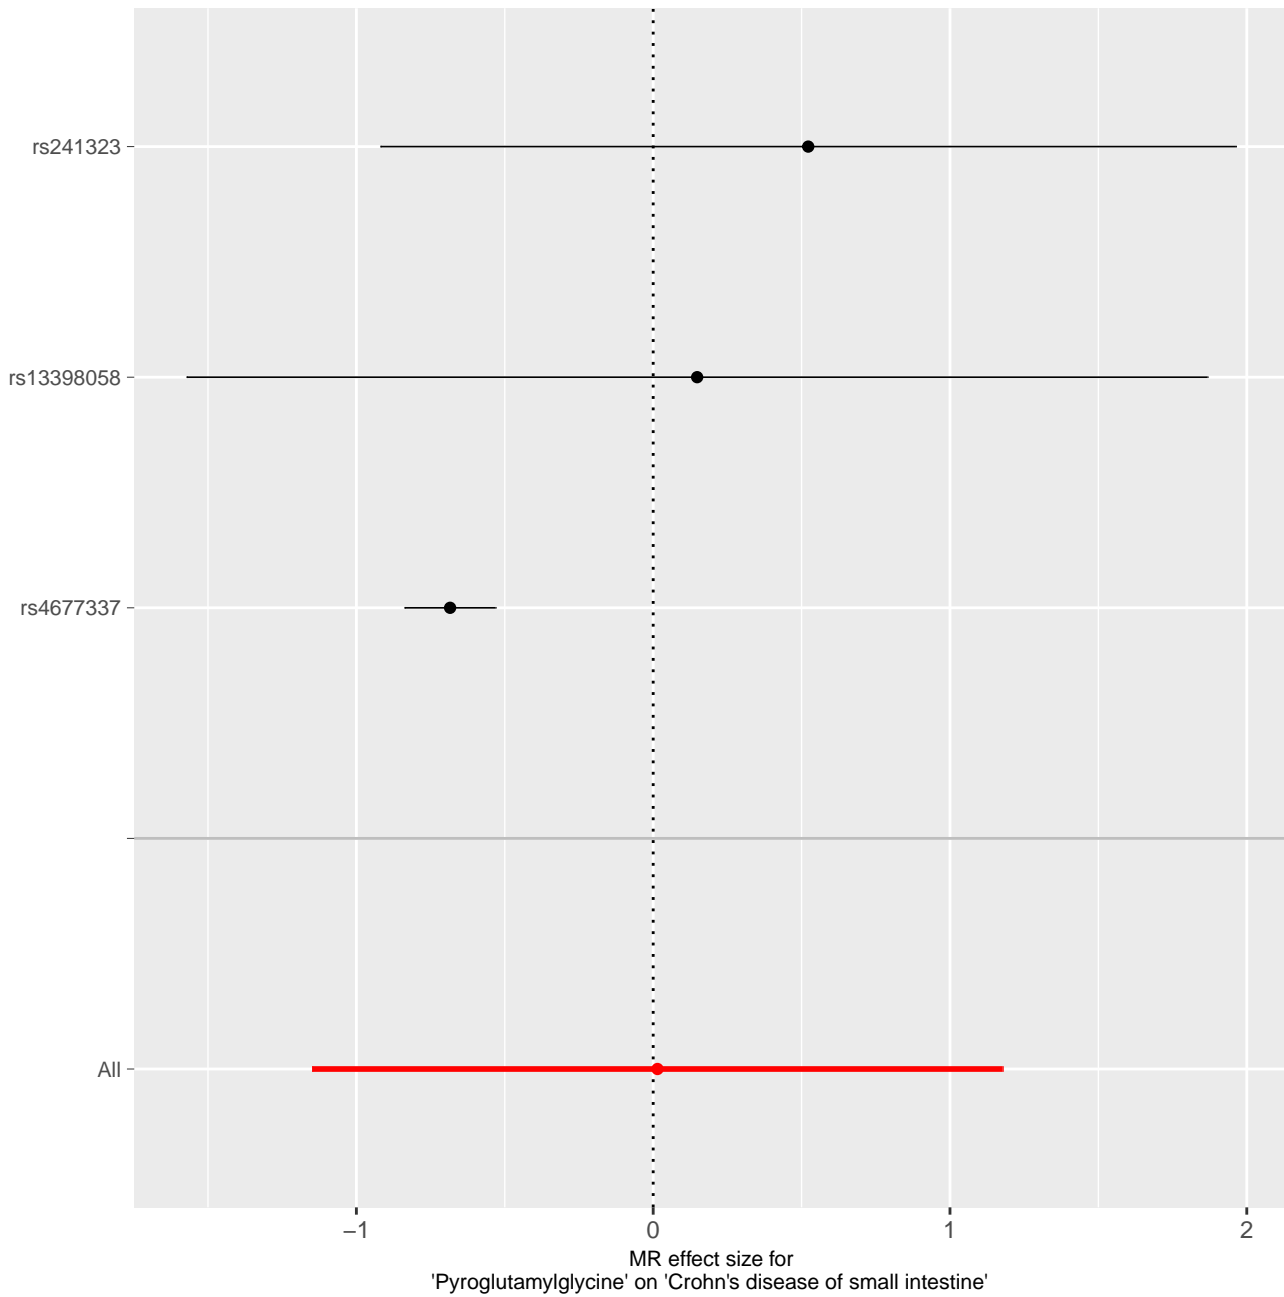

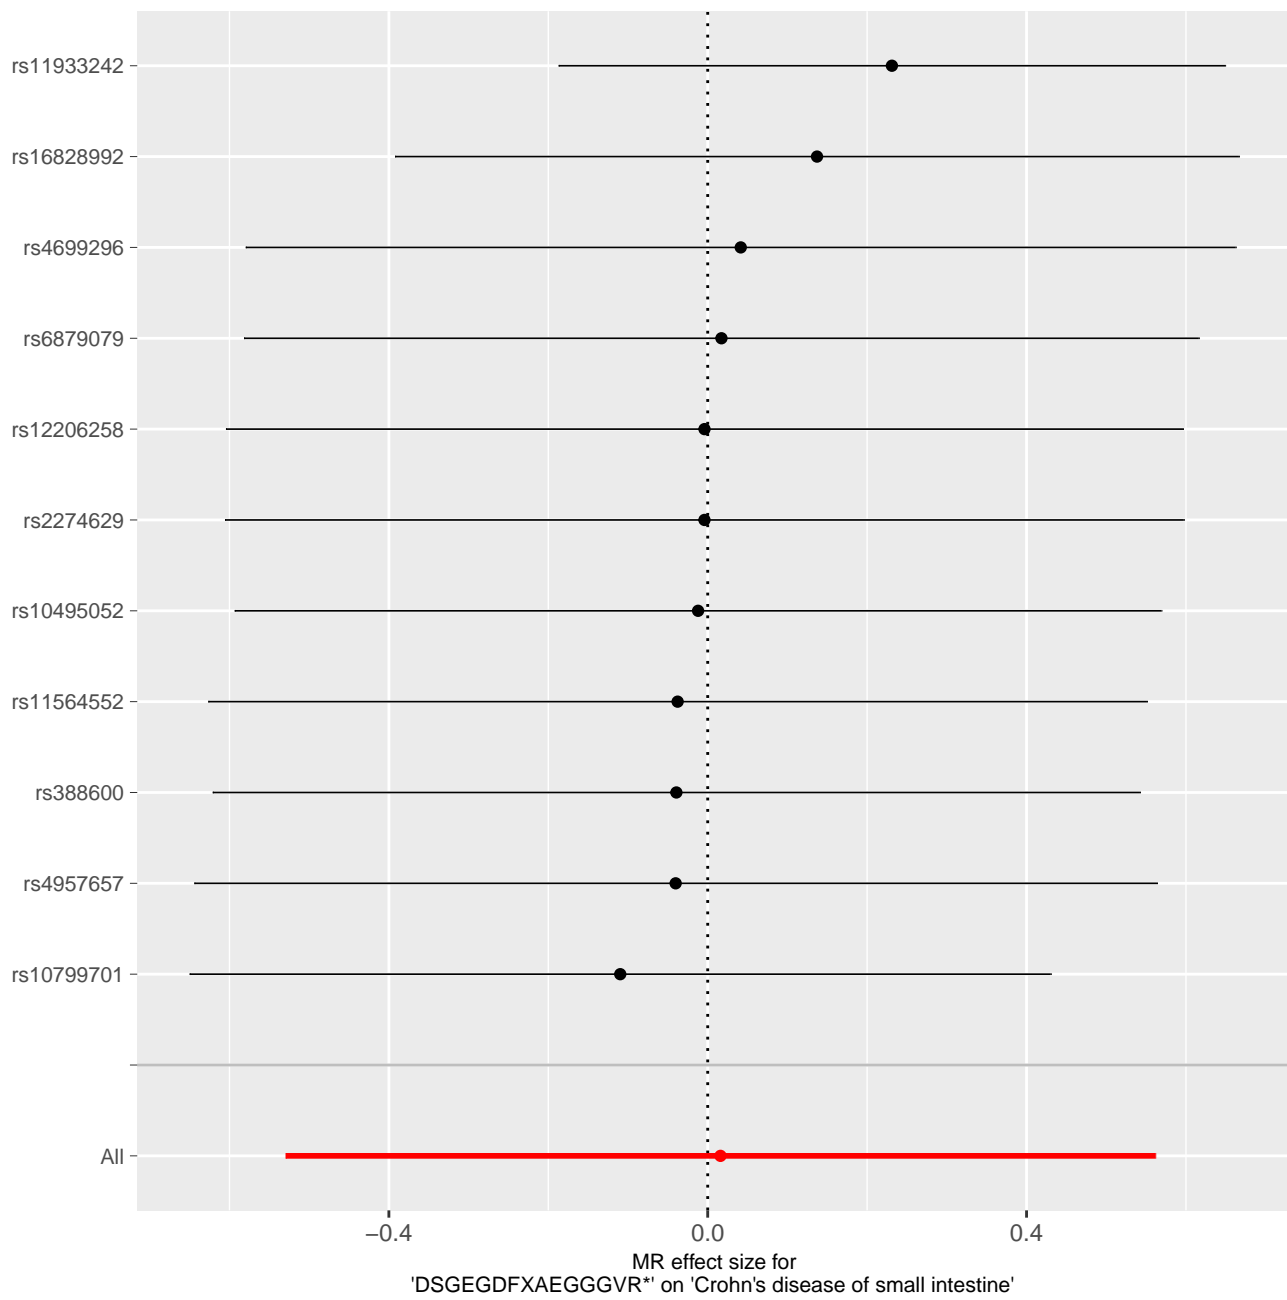

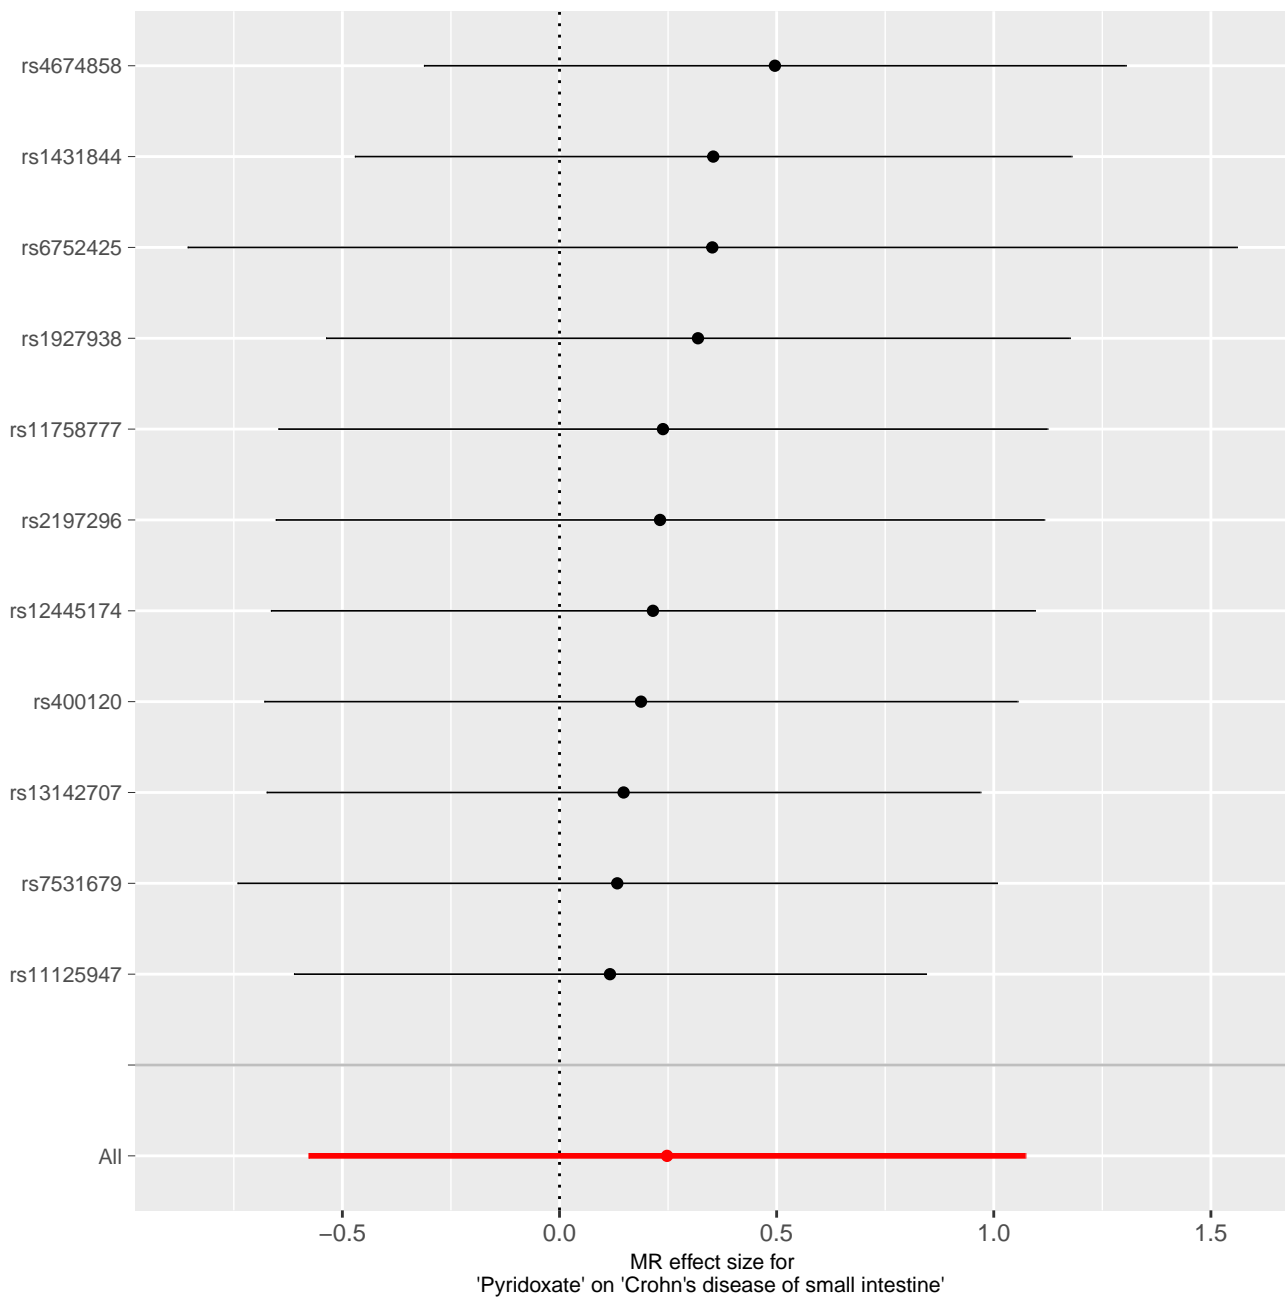

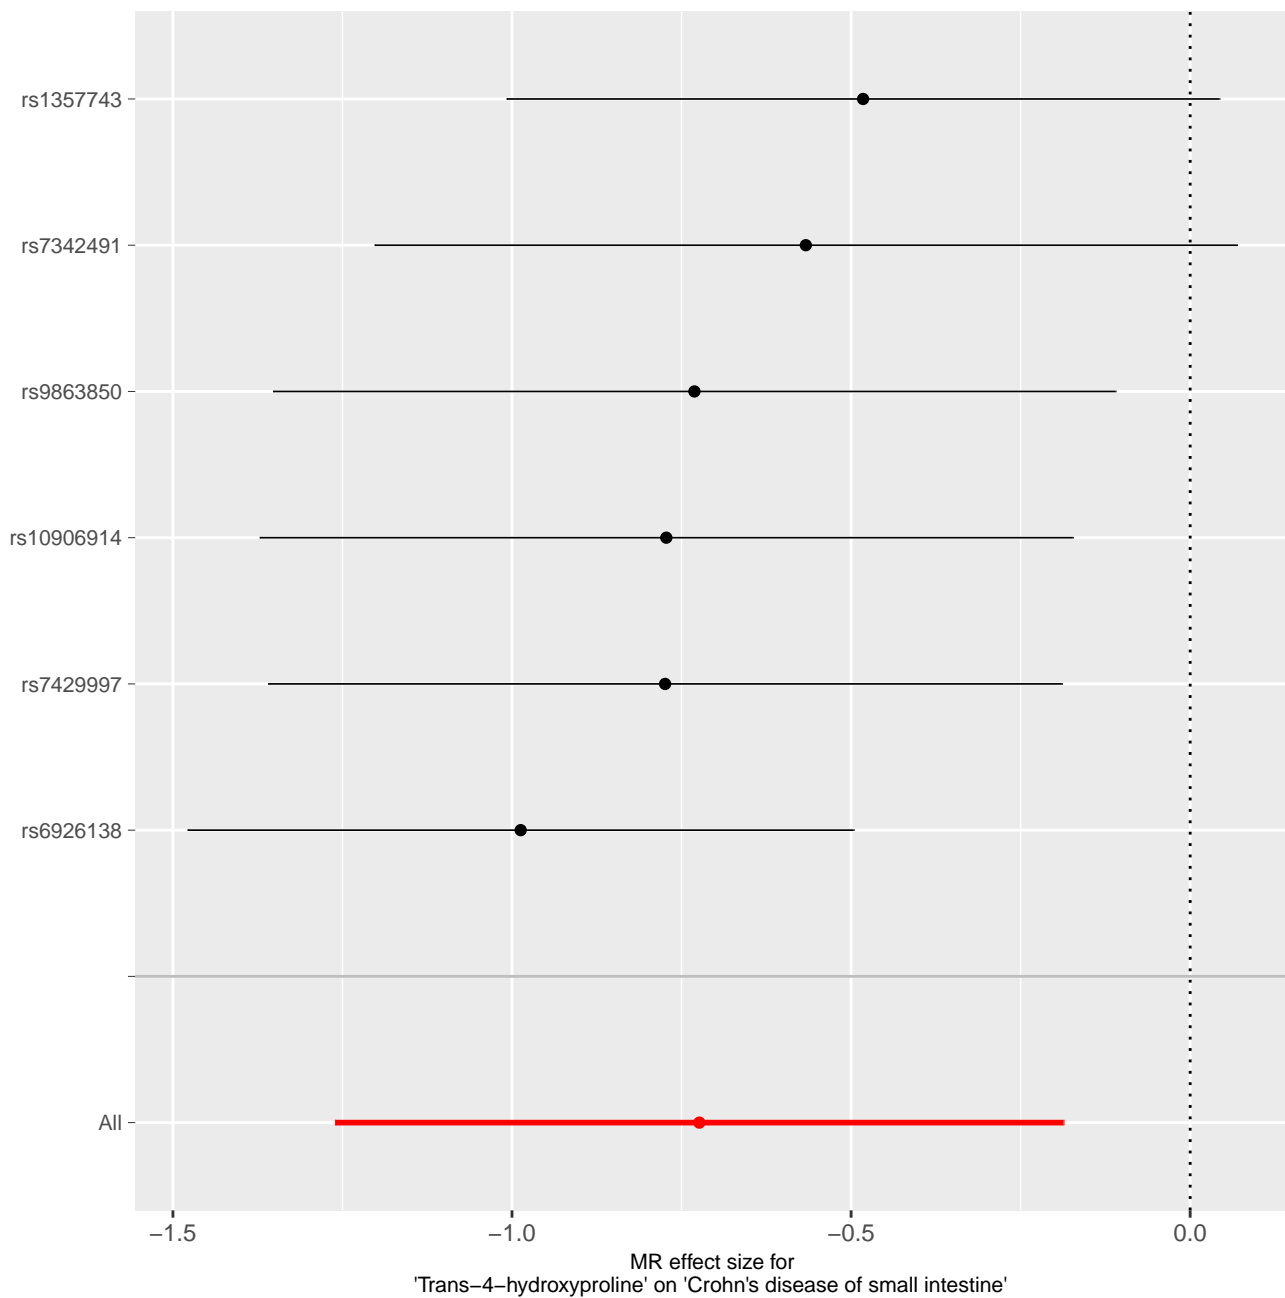

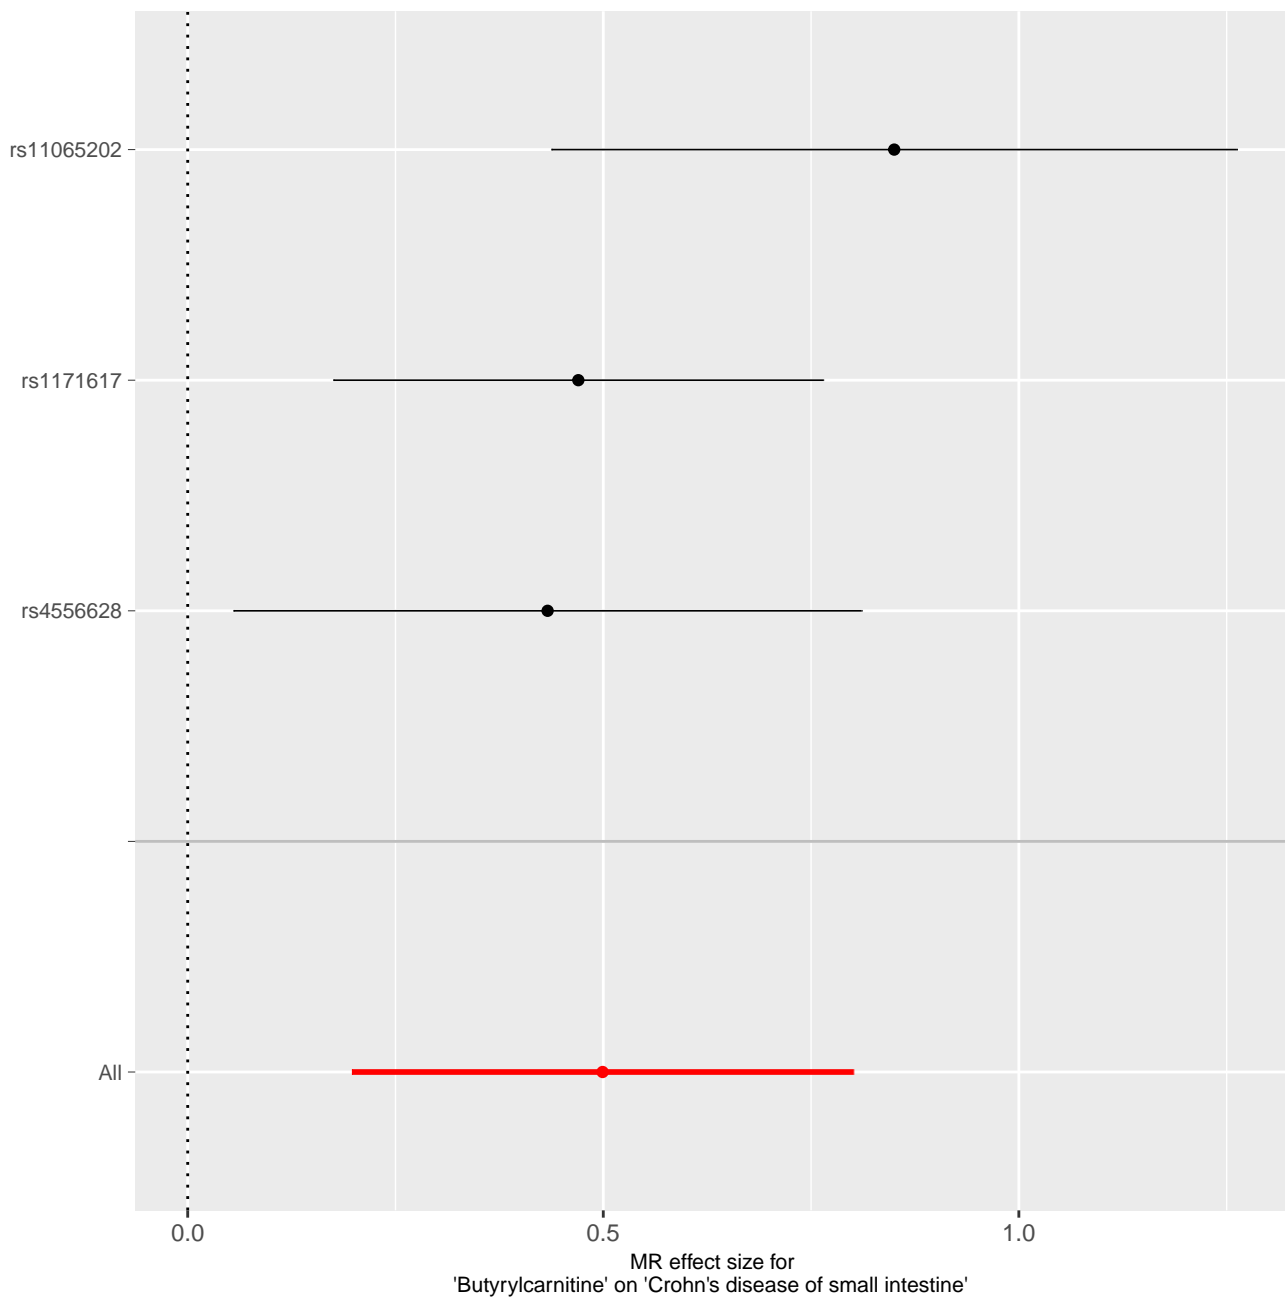

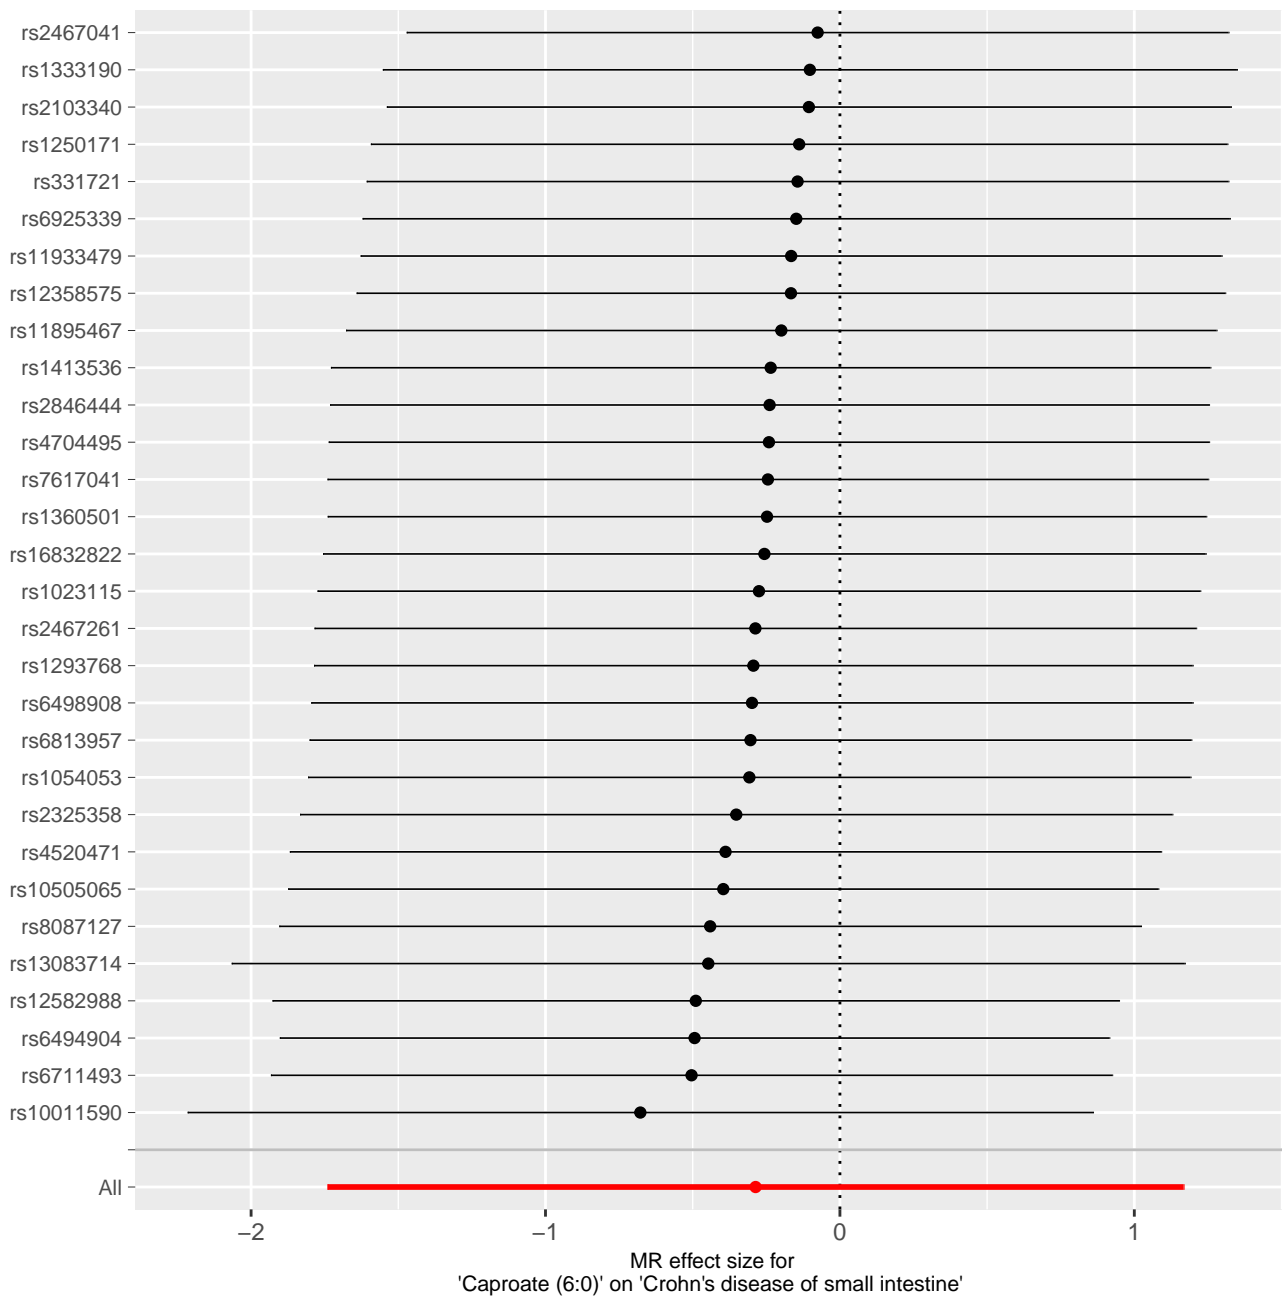

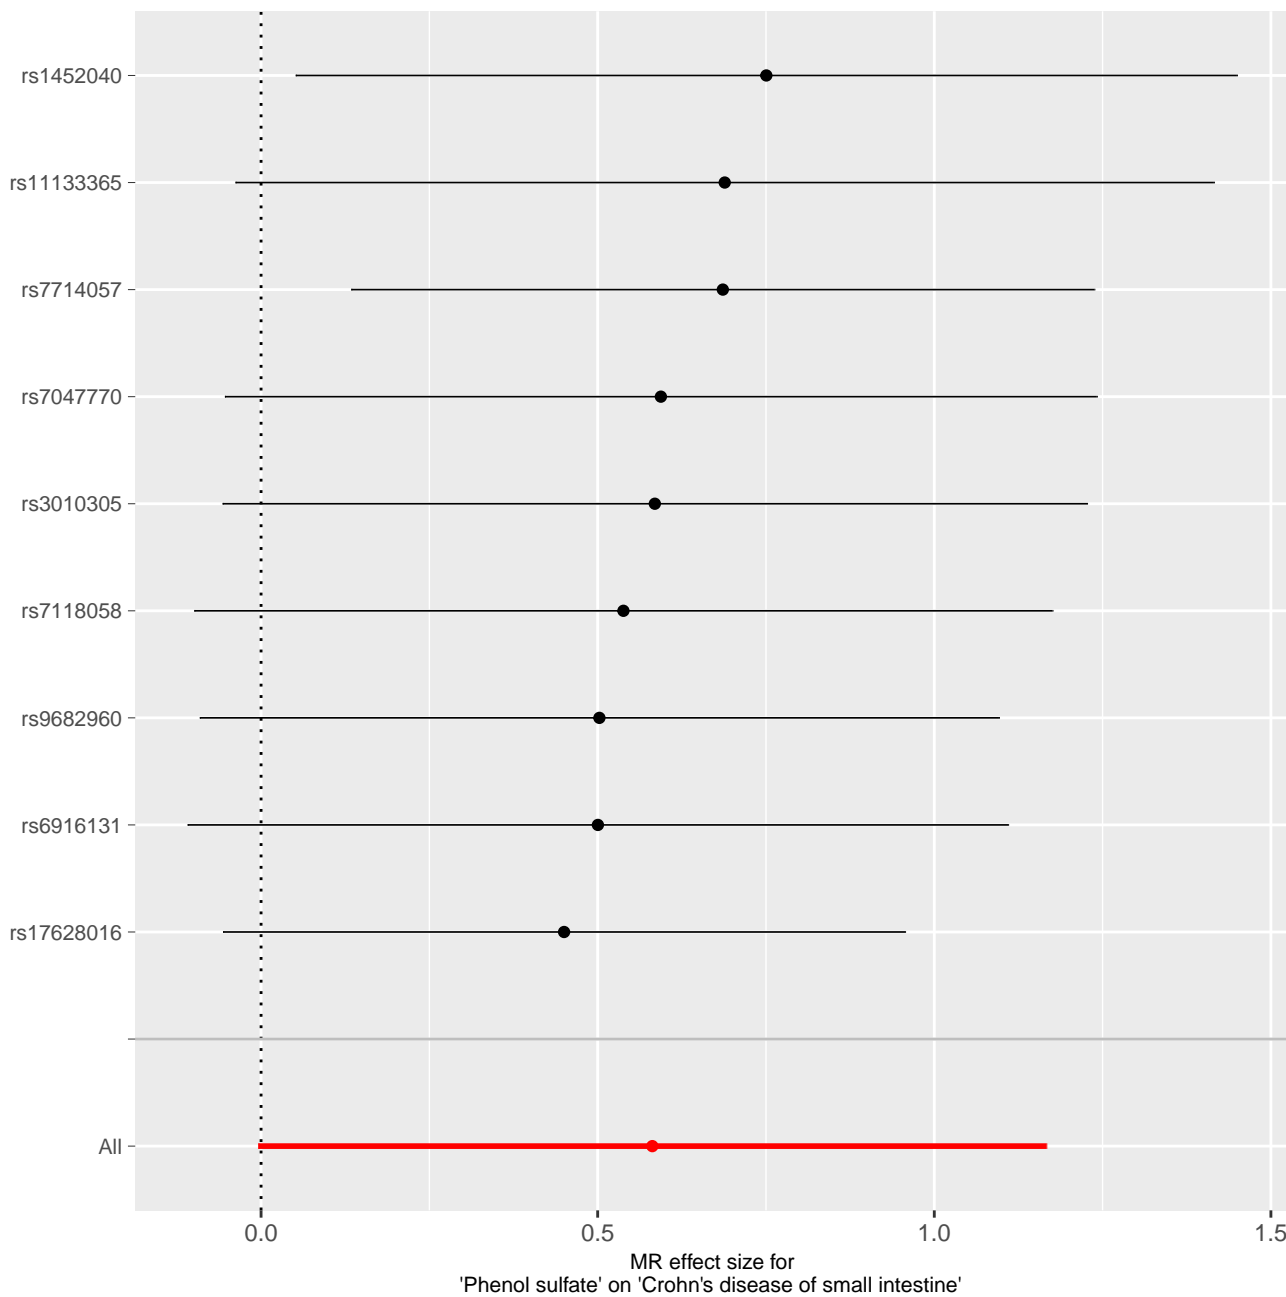

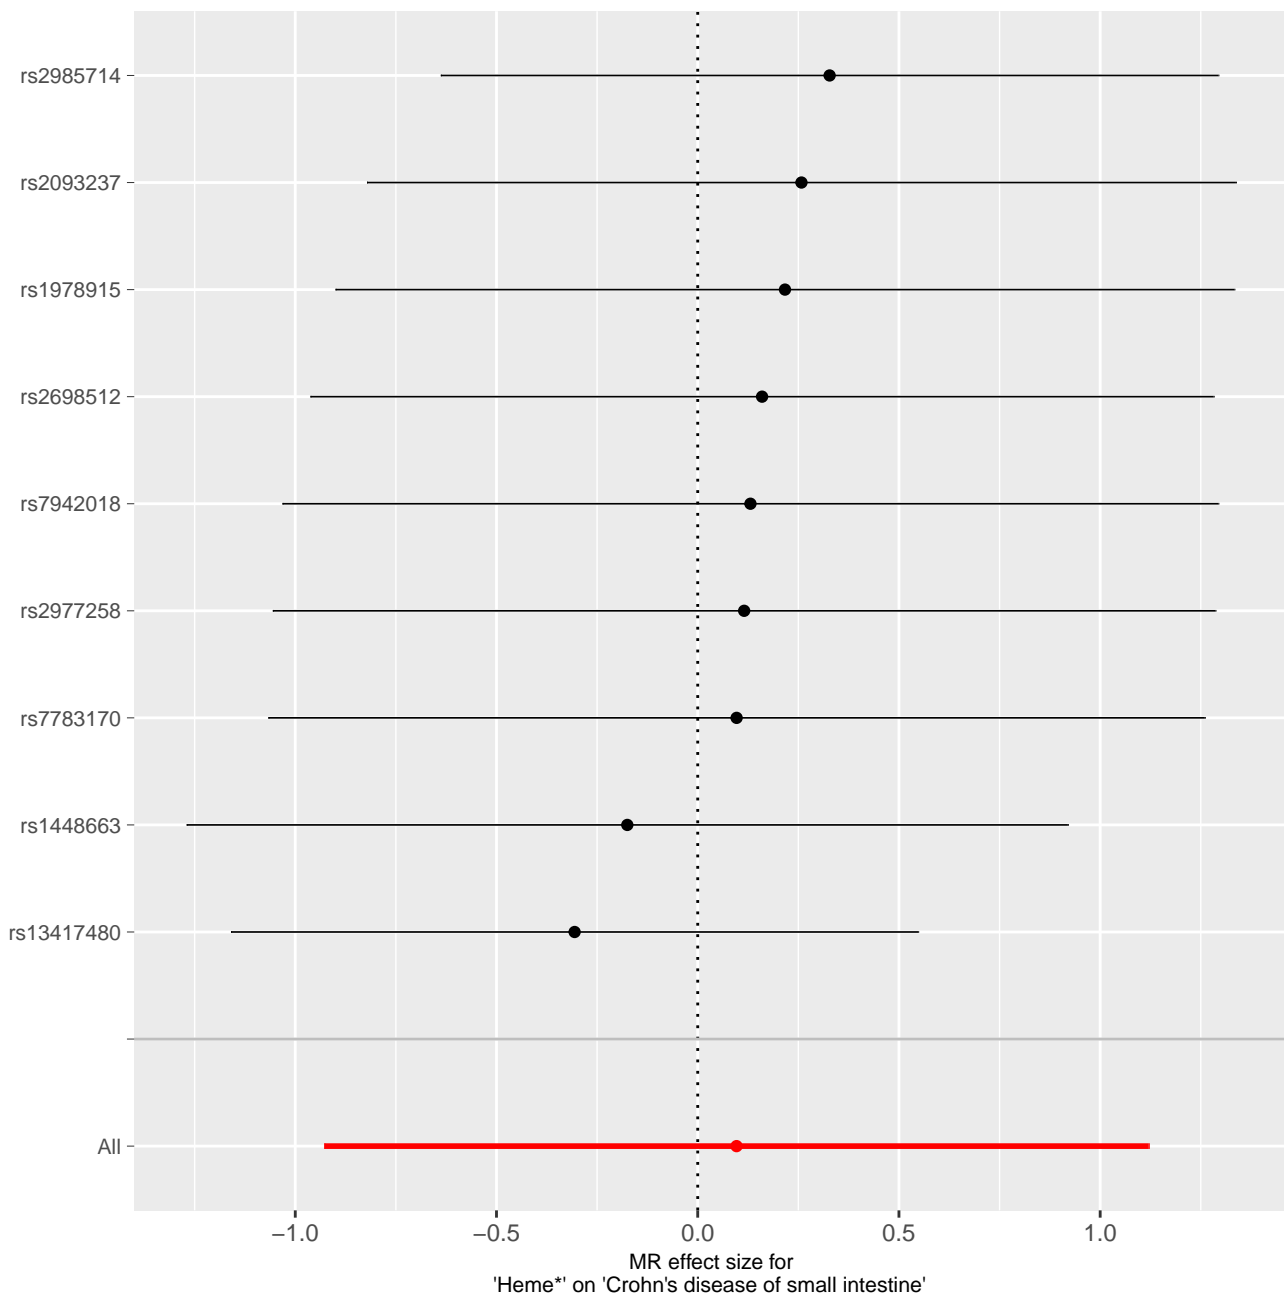



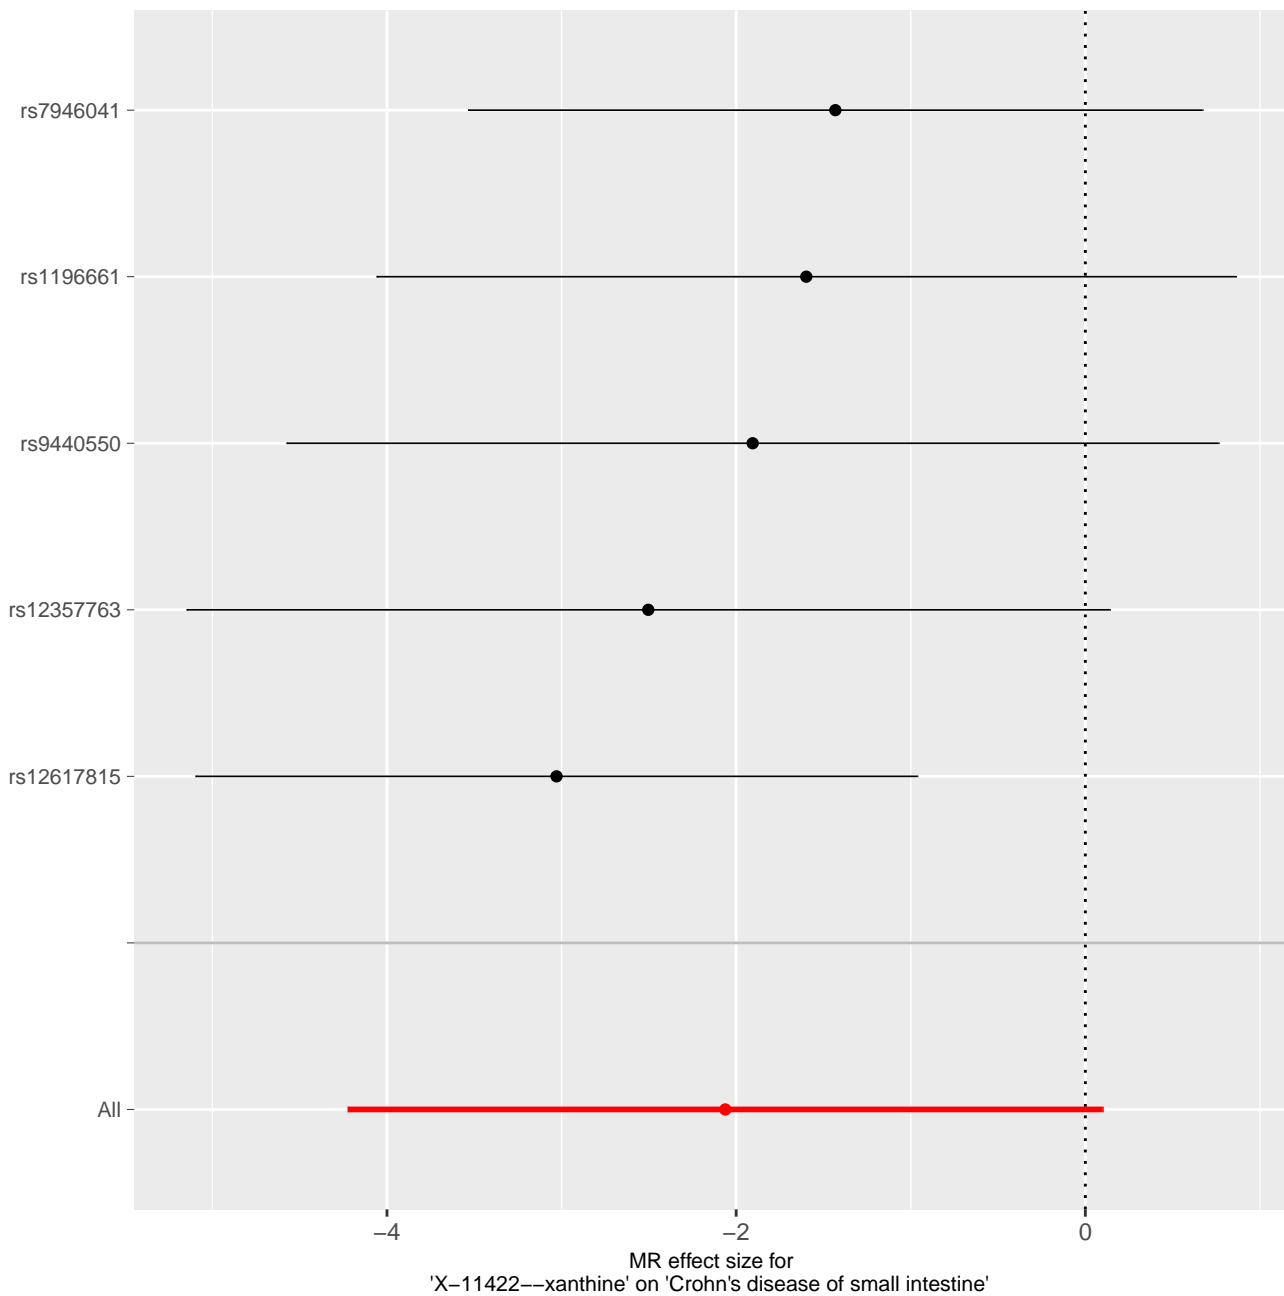

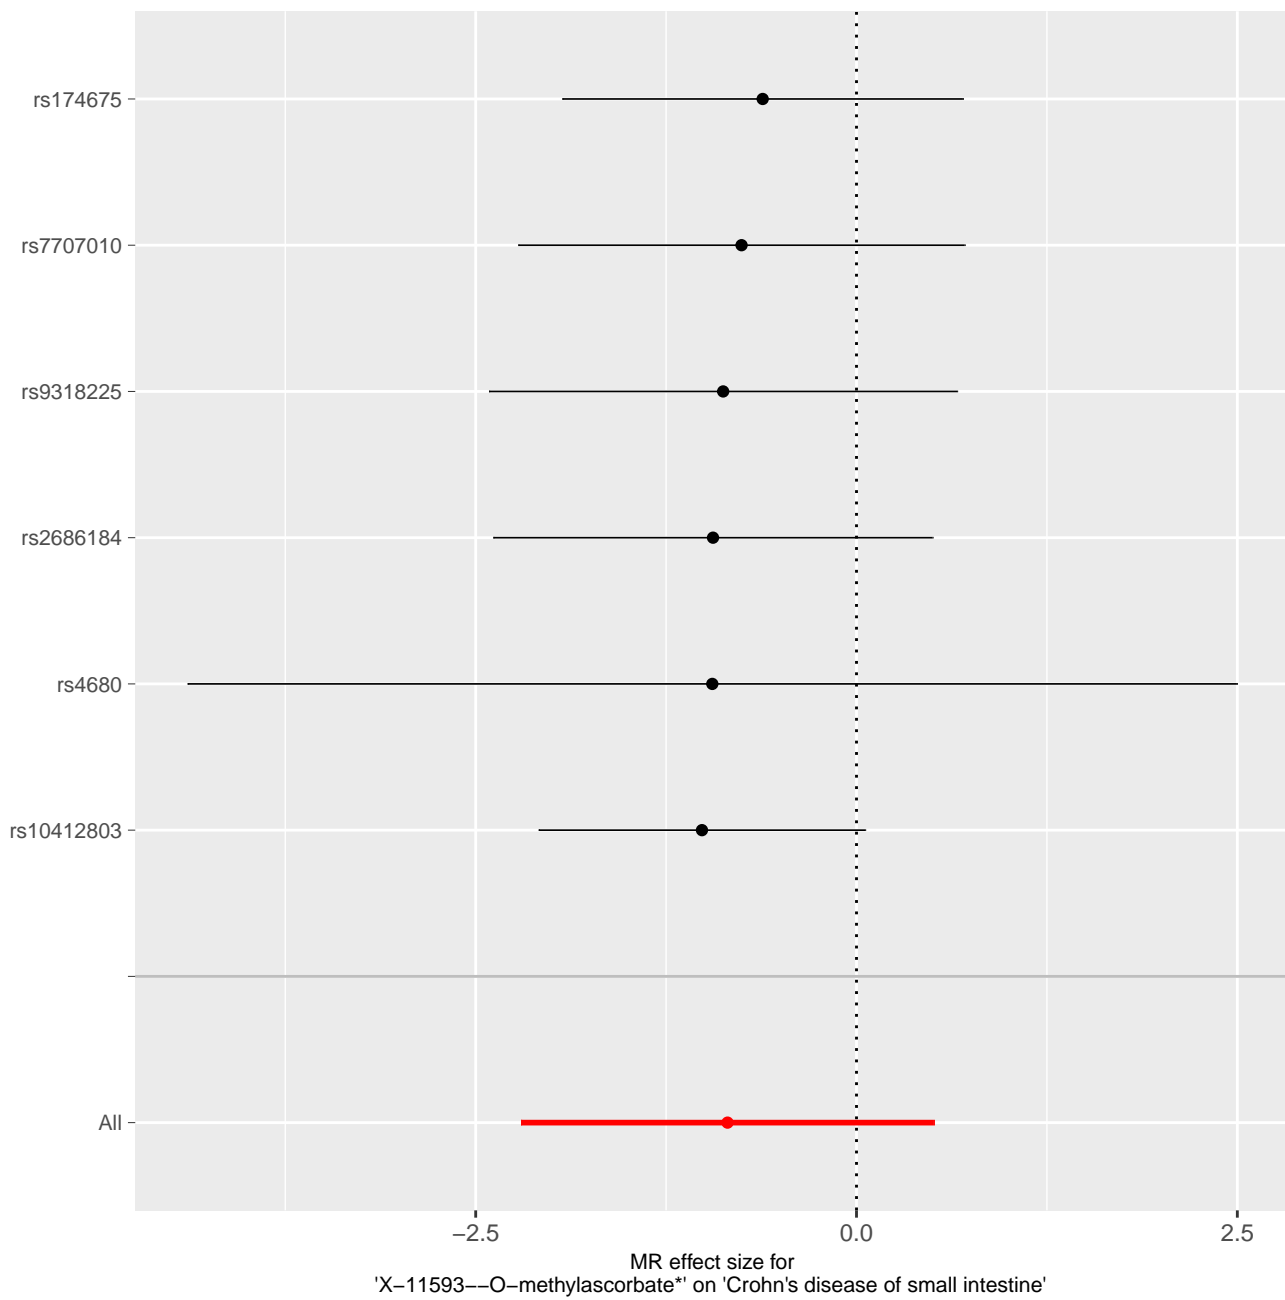

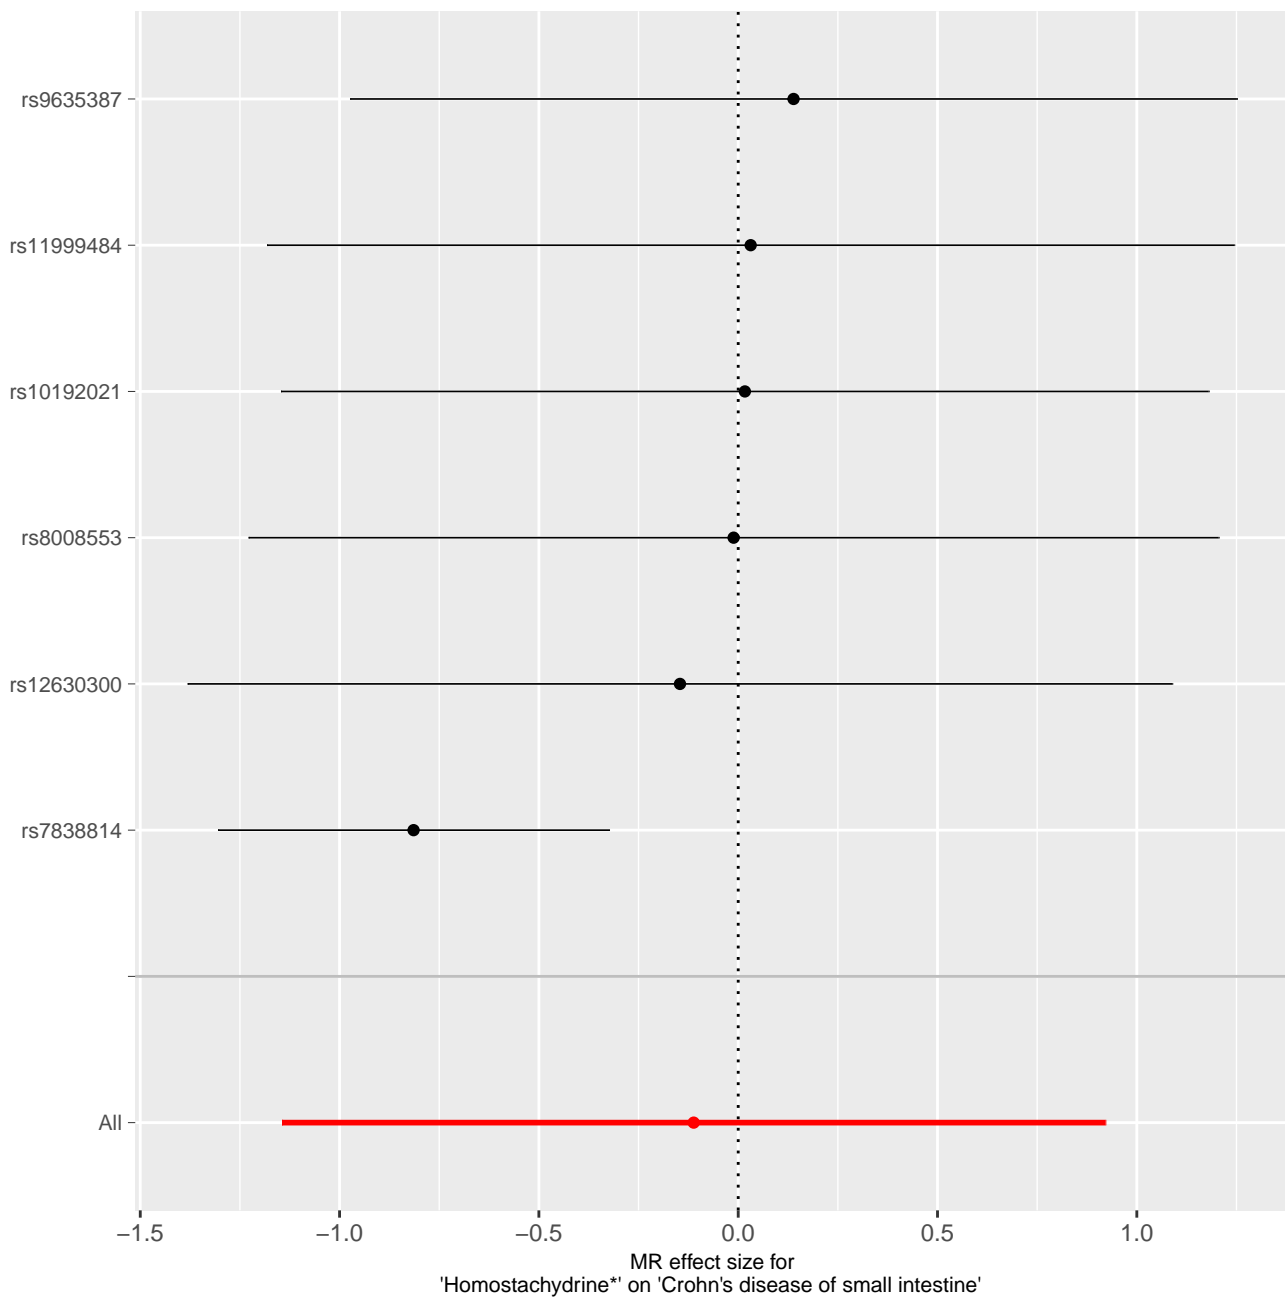

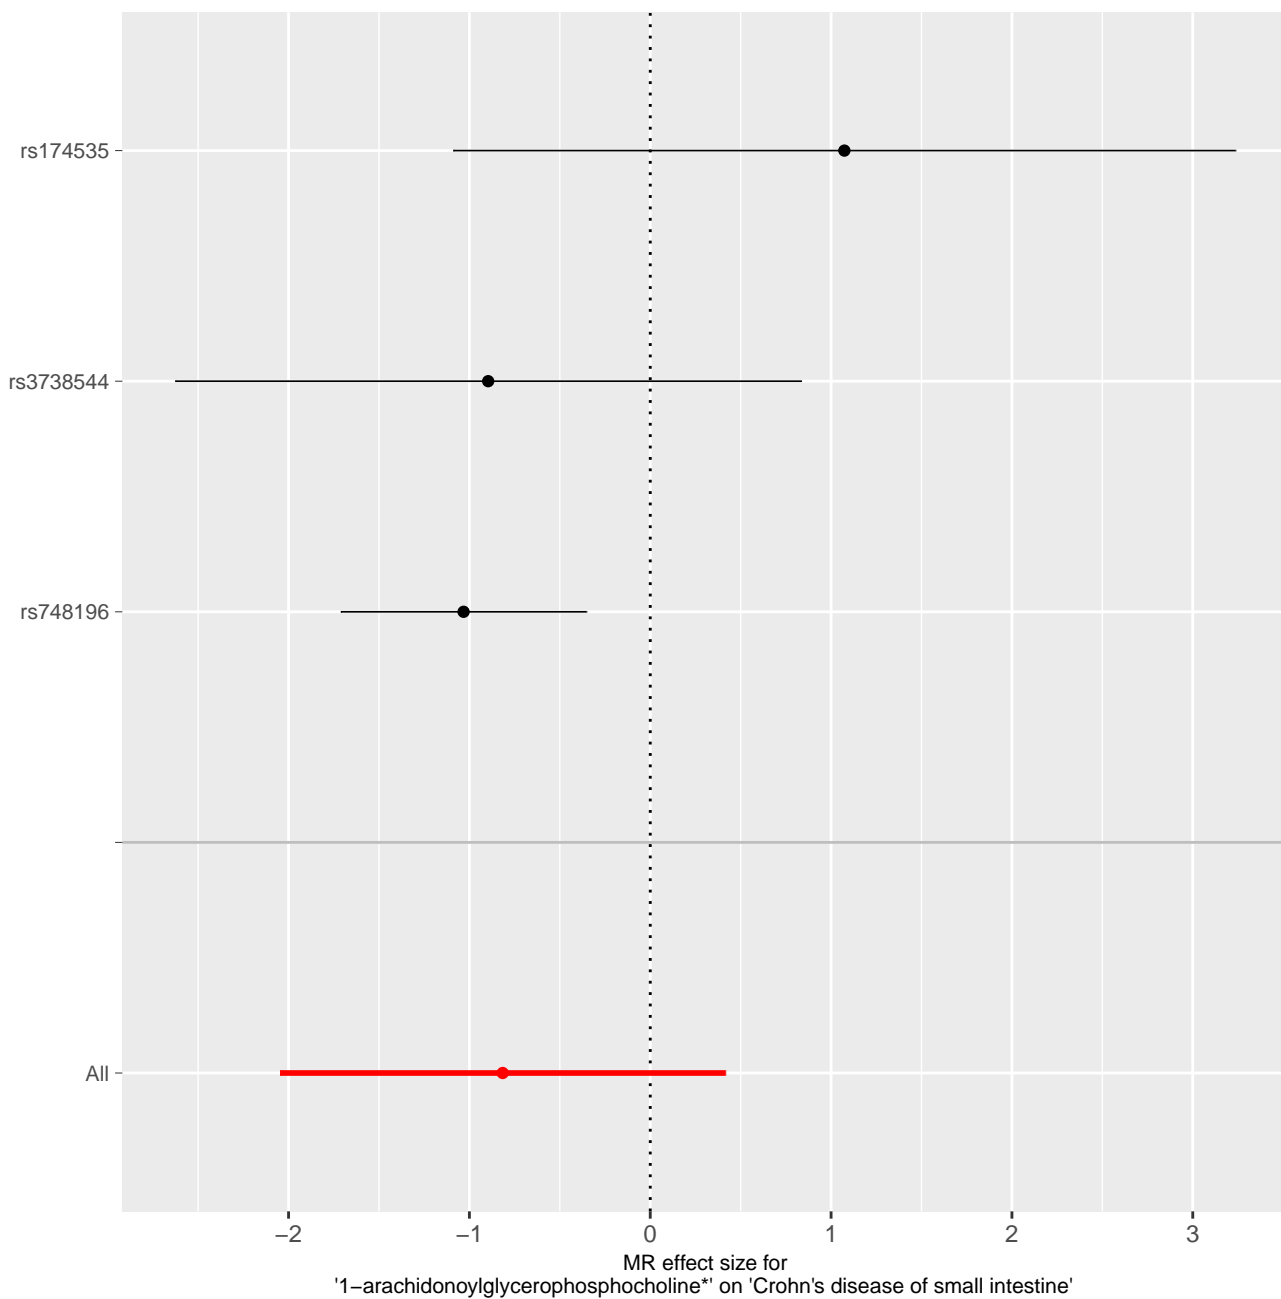

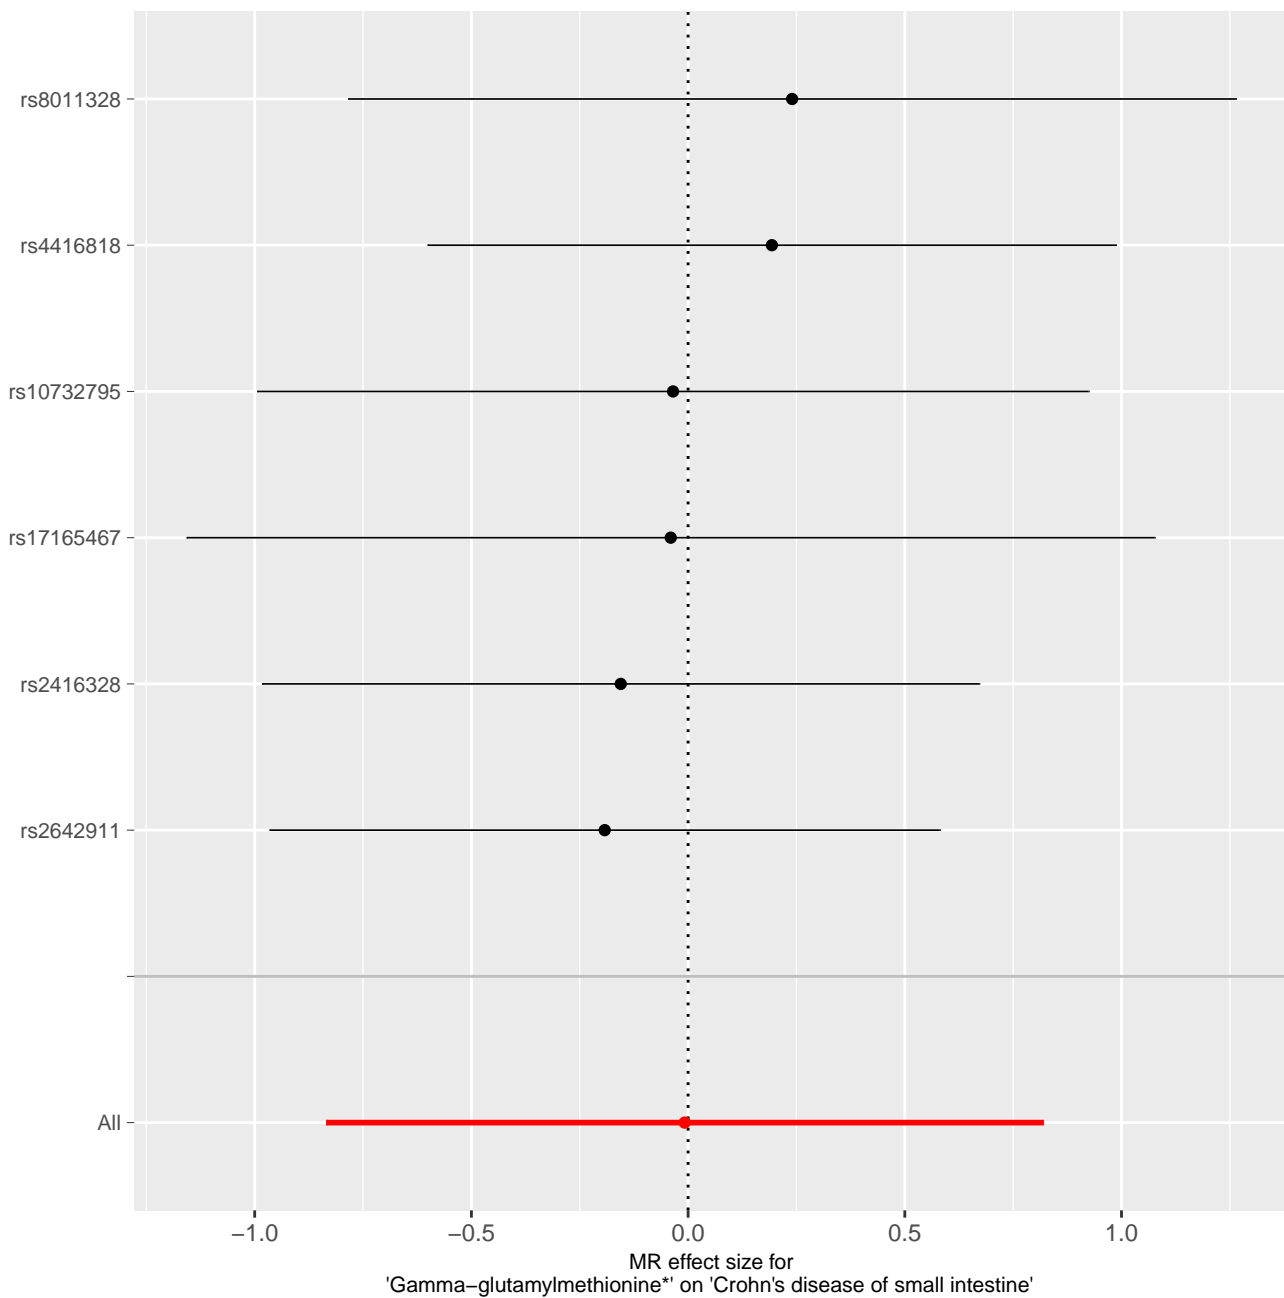

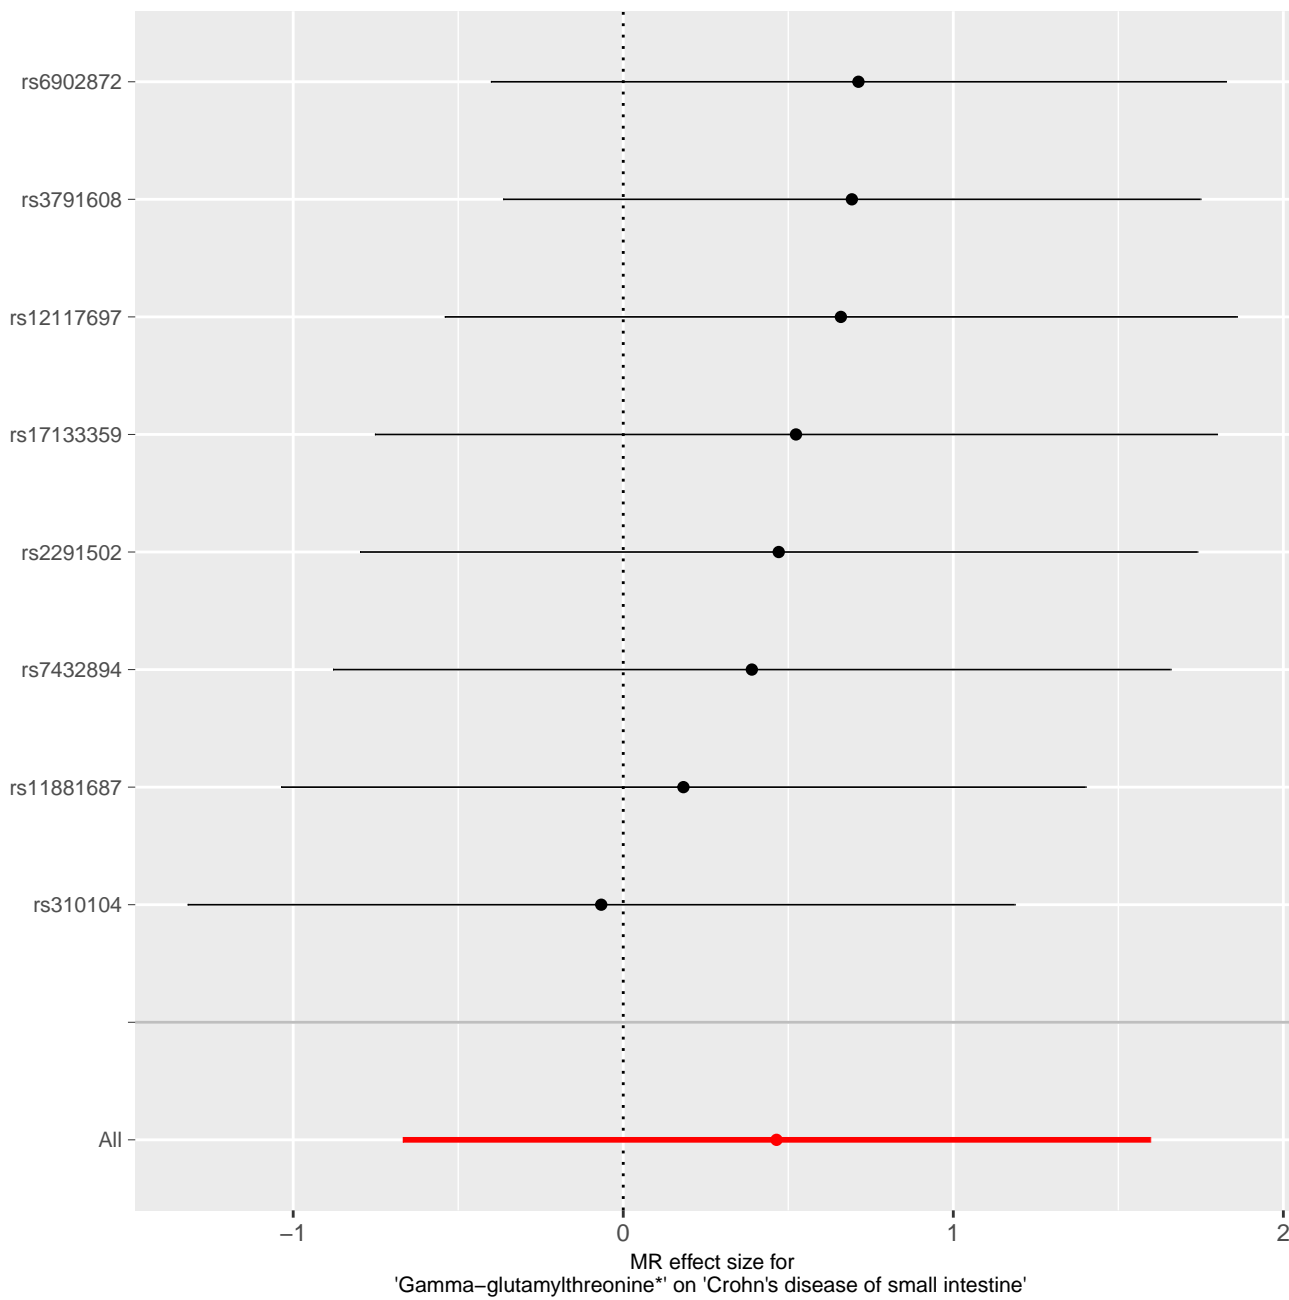

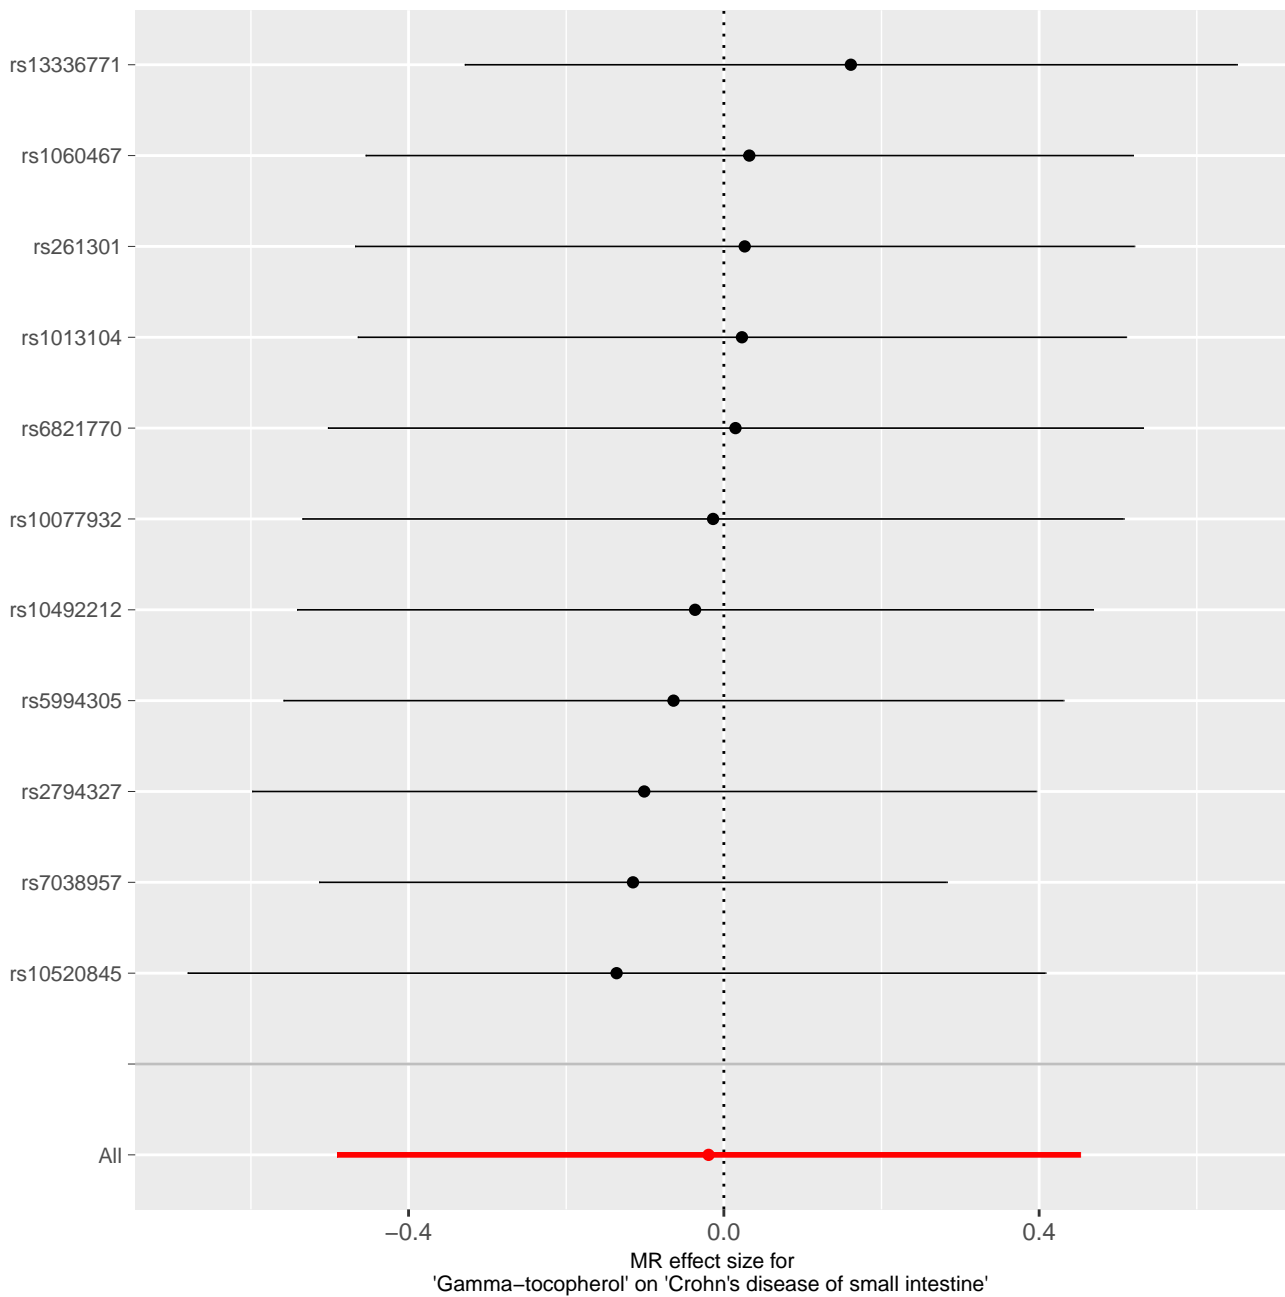

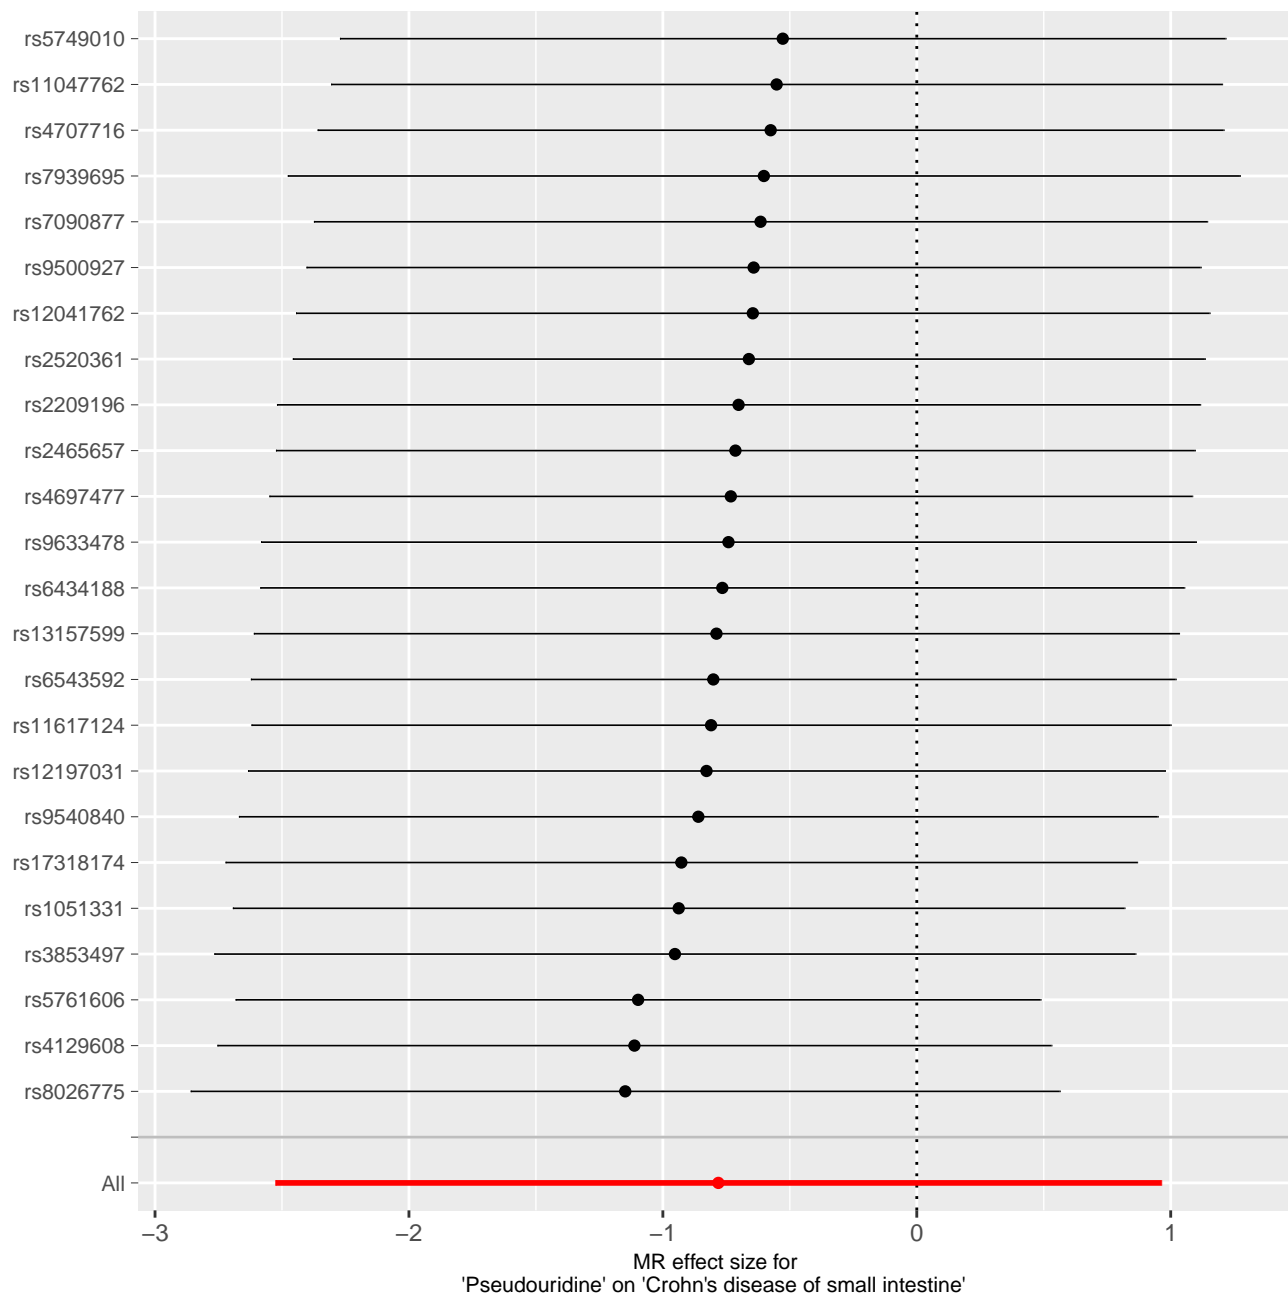



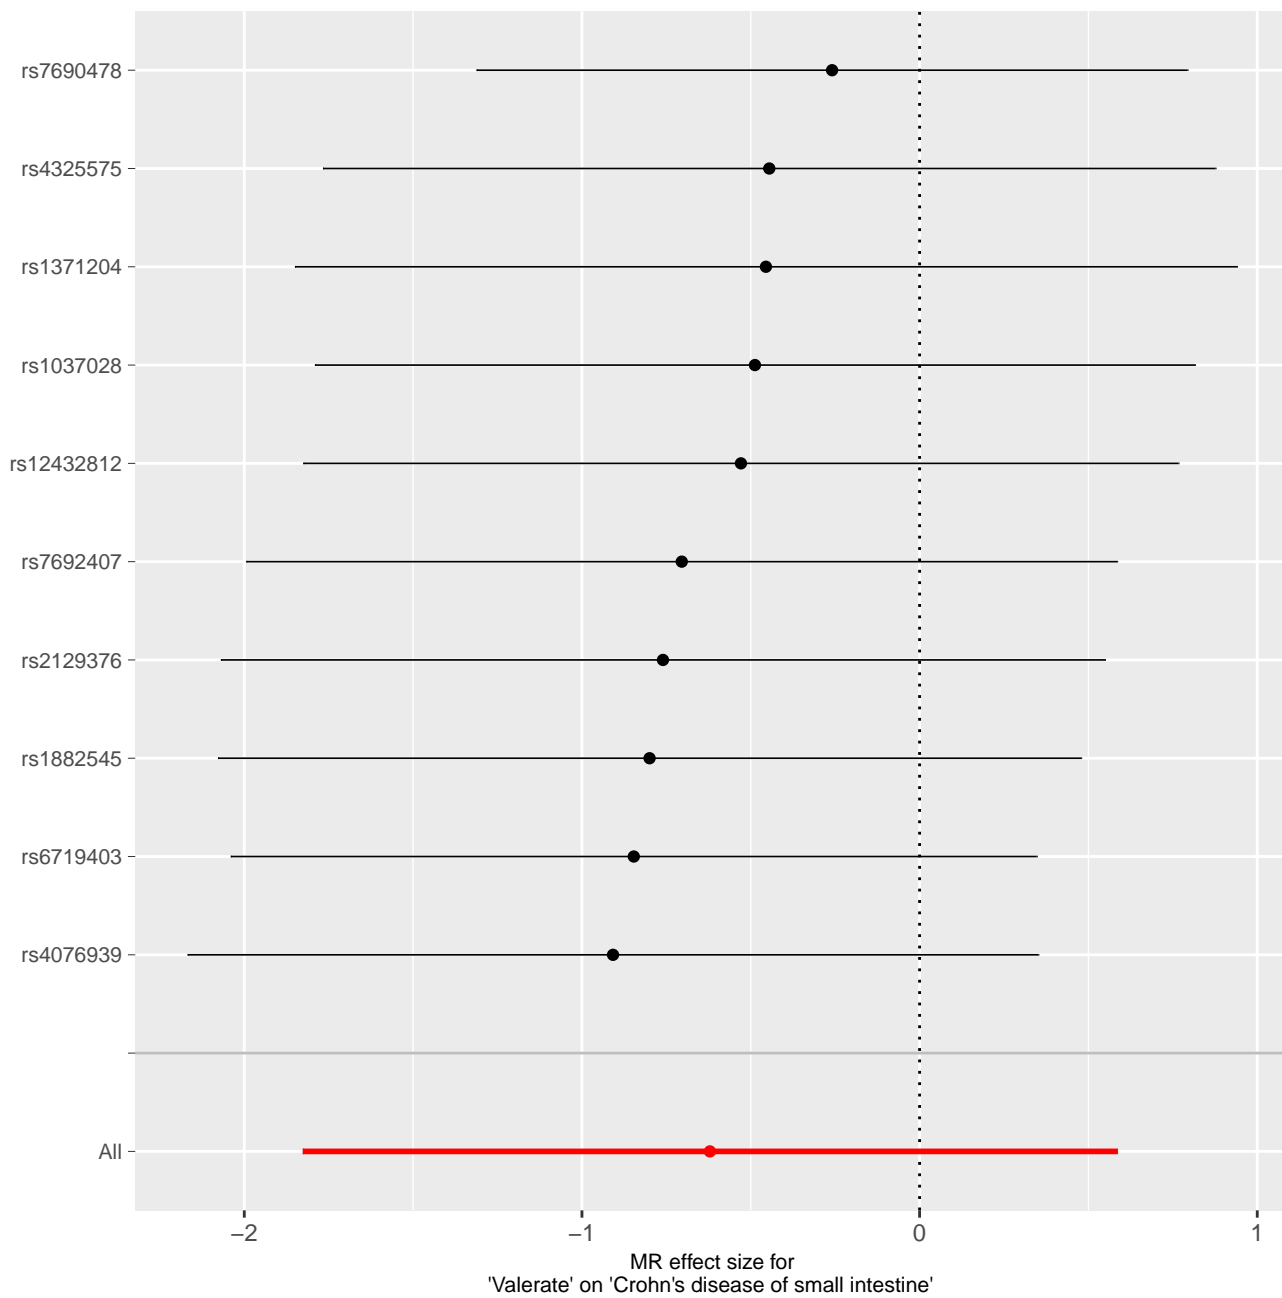

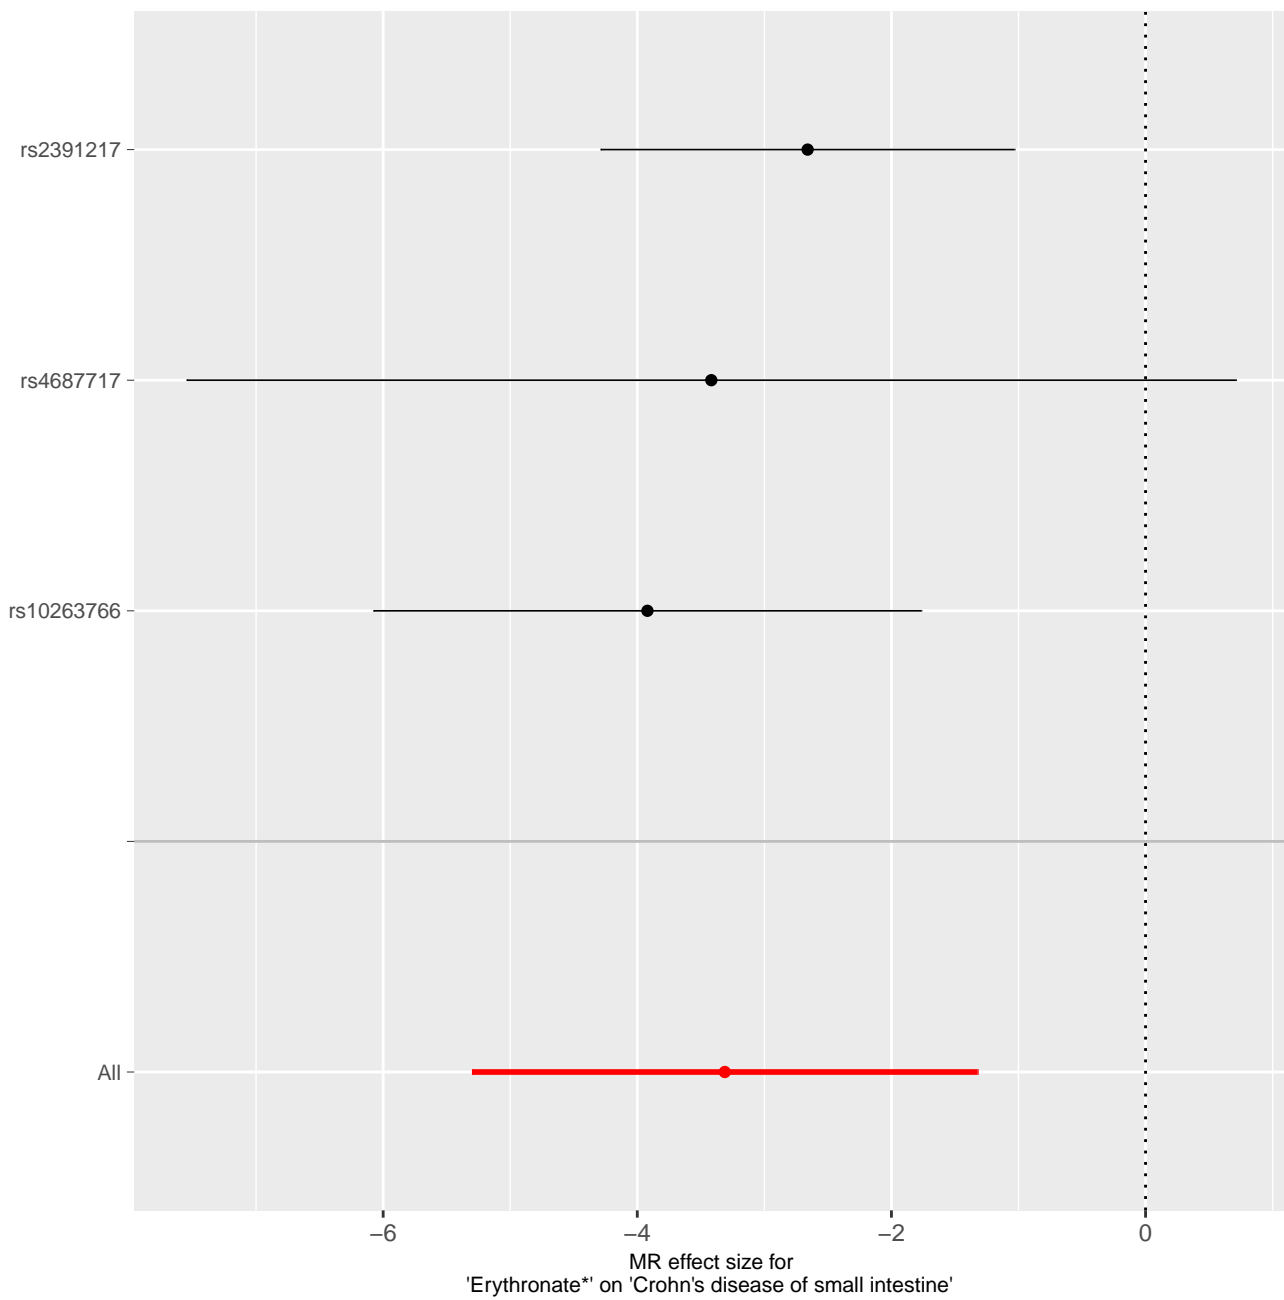

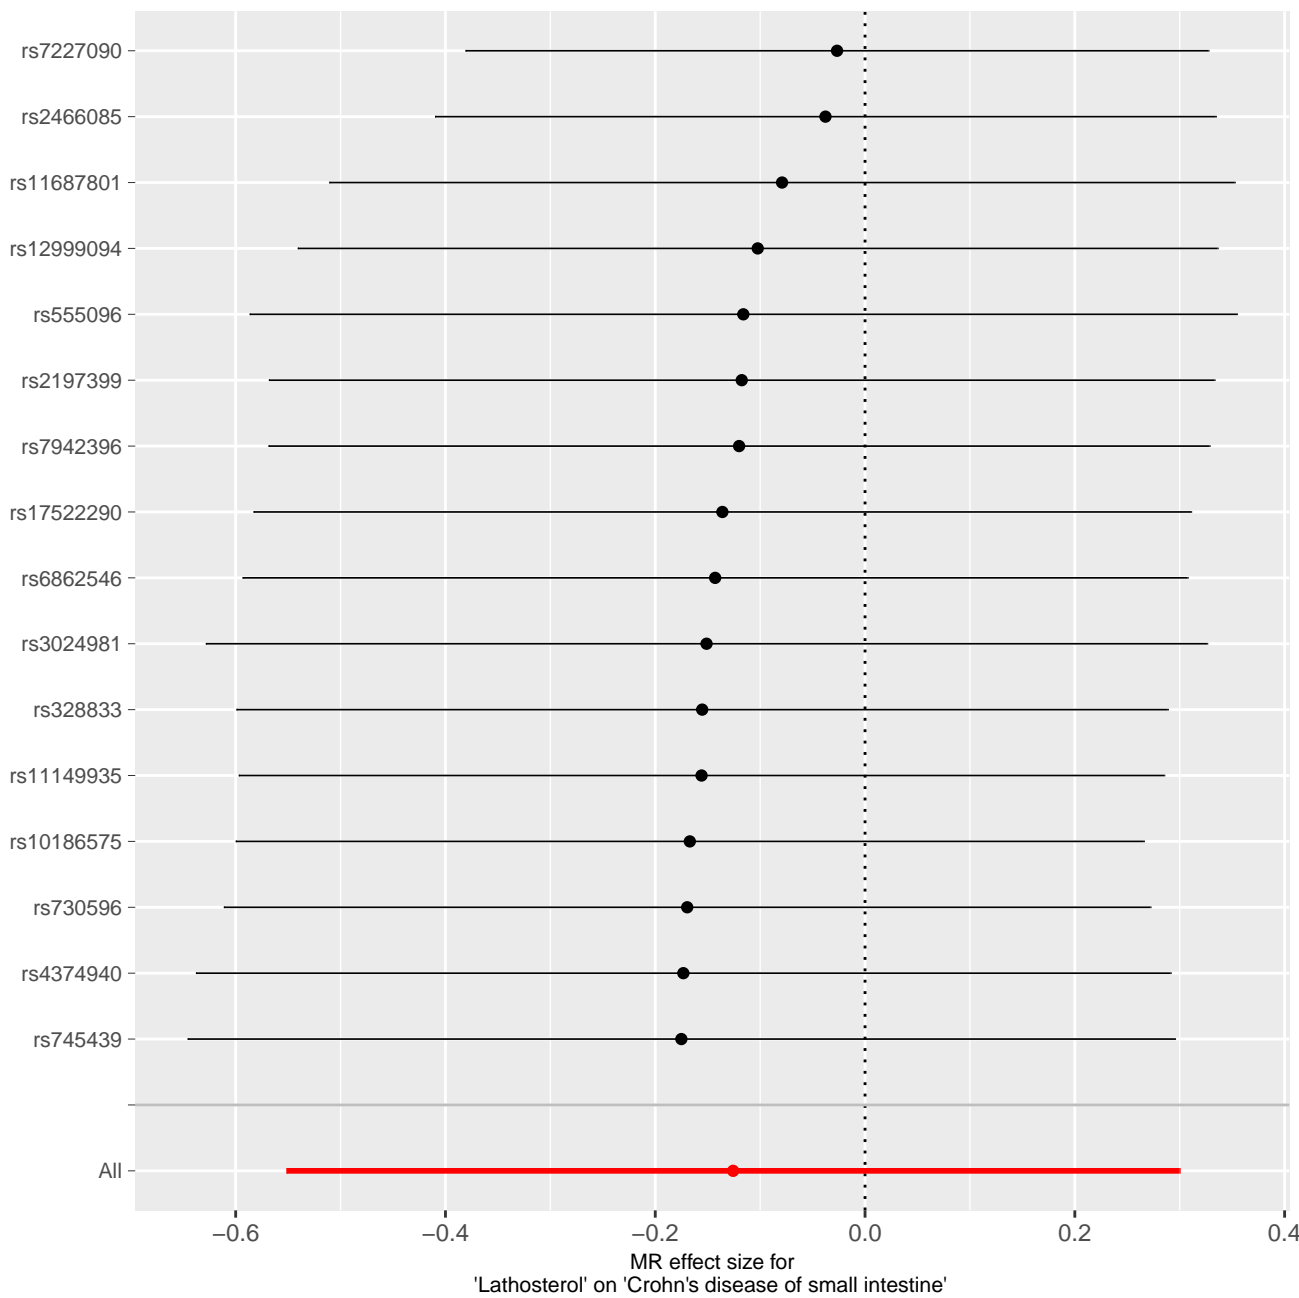

Batch 735 : Eicosenoate (20:1n9 or 11) on Crohn's disease of small intestine

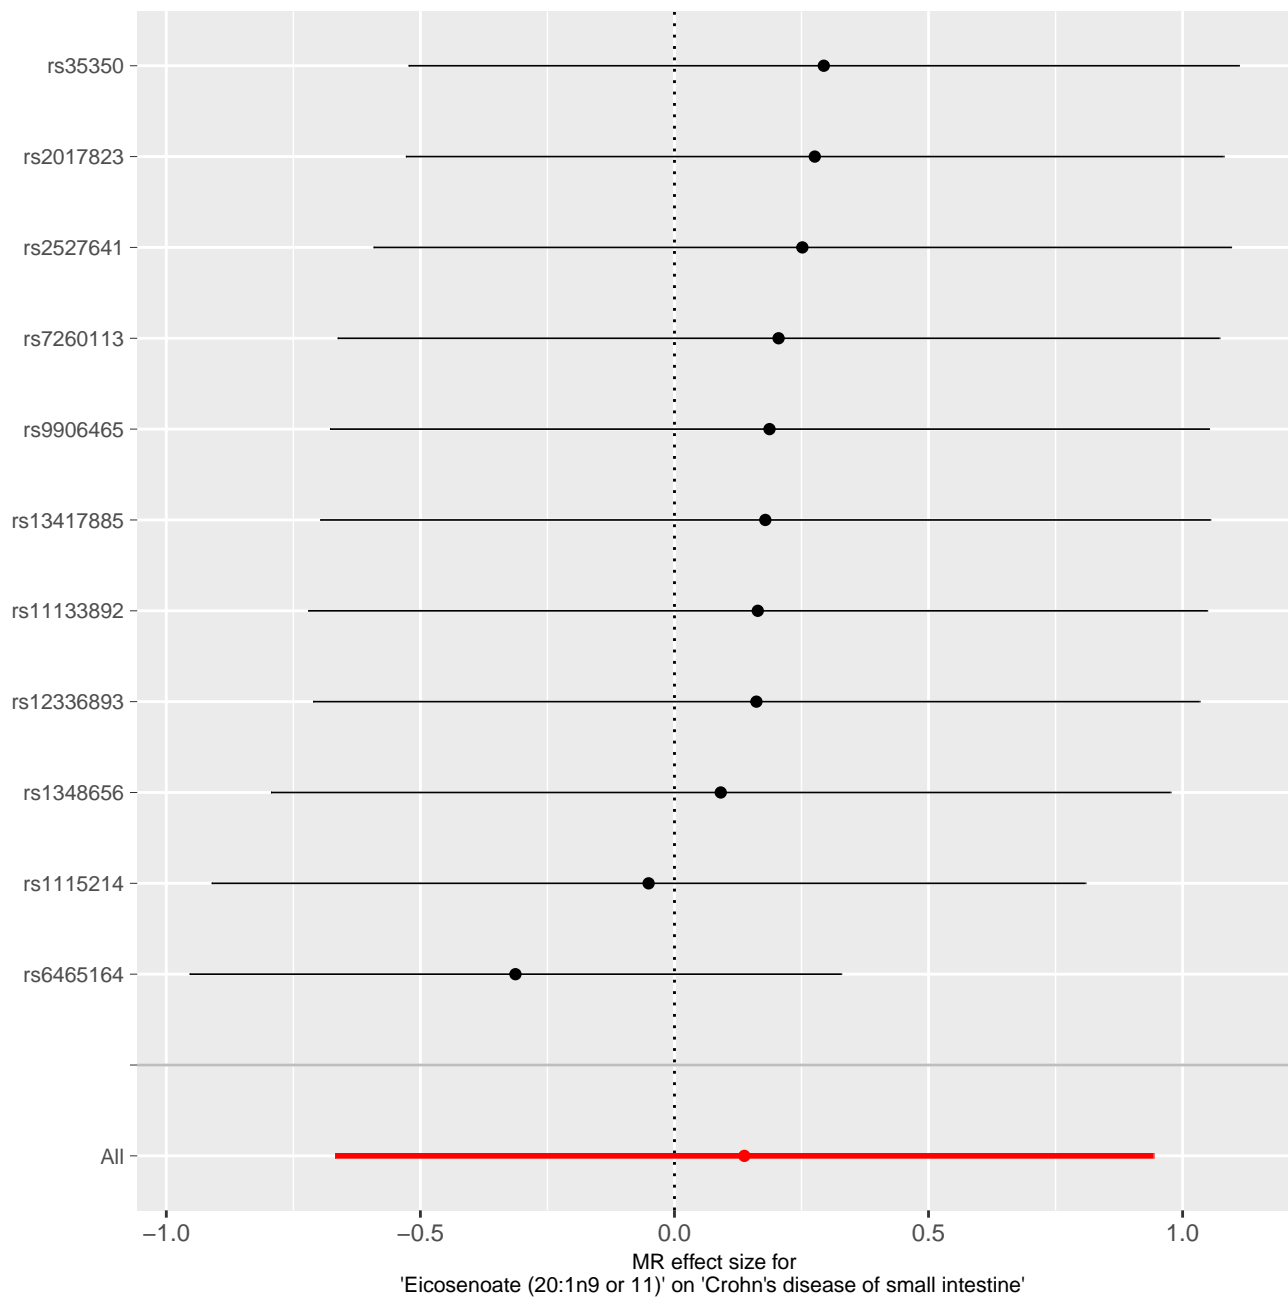

rs8002180

rs7775554

rs6804368

All

0.0

0.5

1.0

1.5

2.0

MR effect size for

'X-12244--N-acetylcarnosine' on 'Crohn's disease of small intestine'

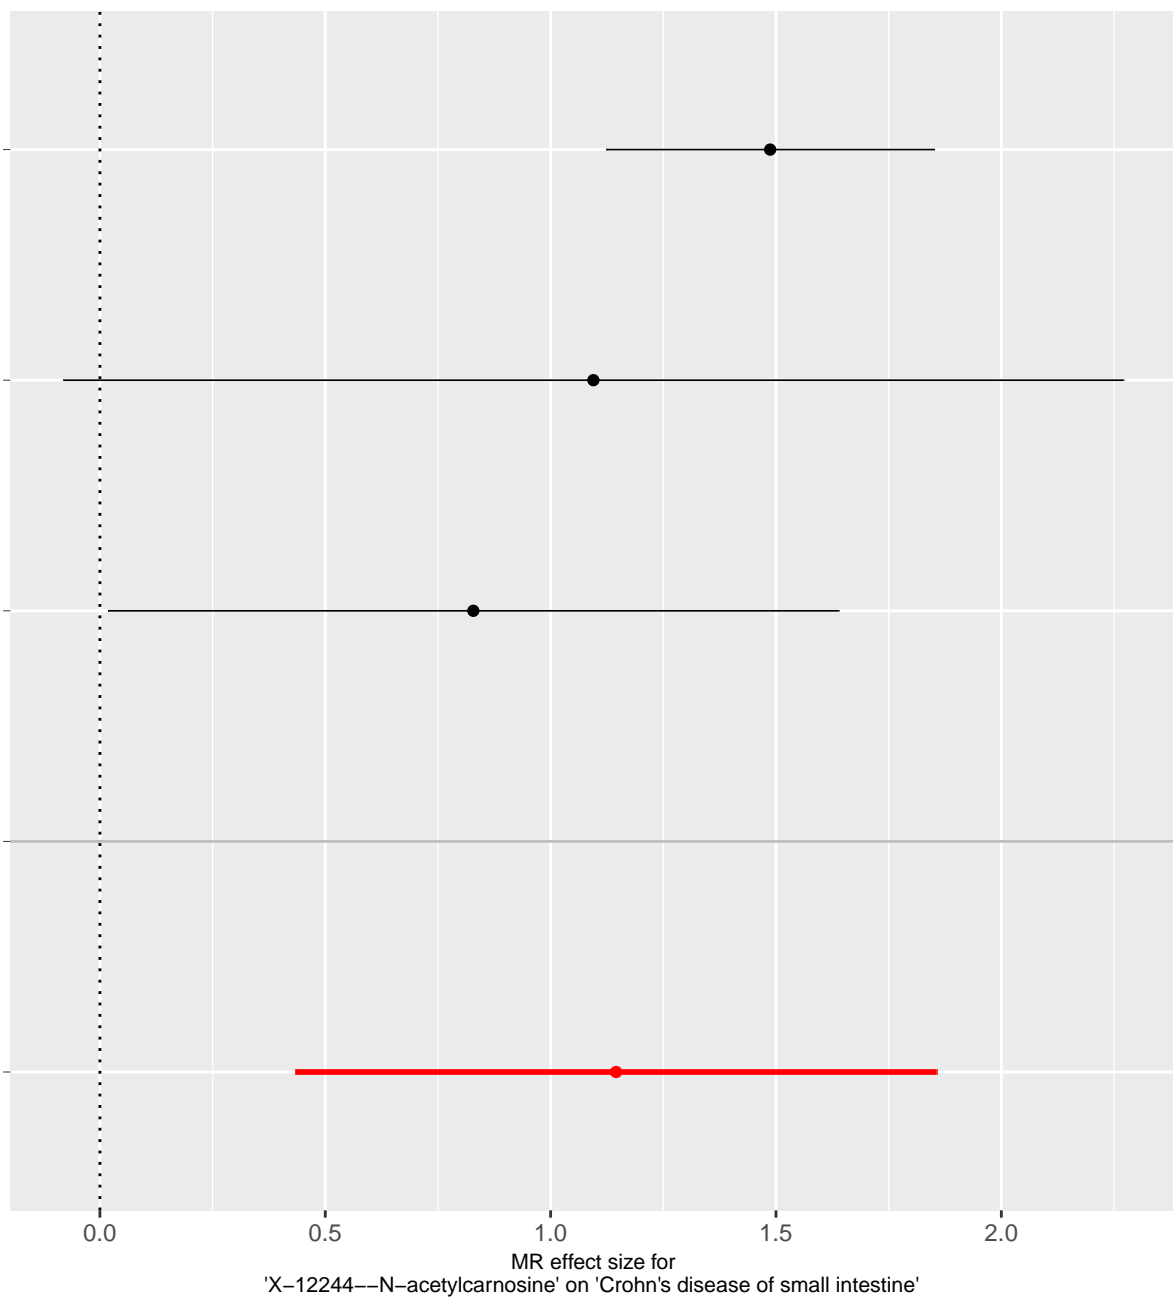

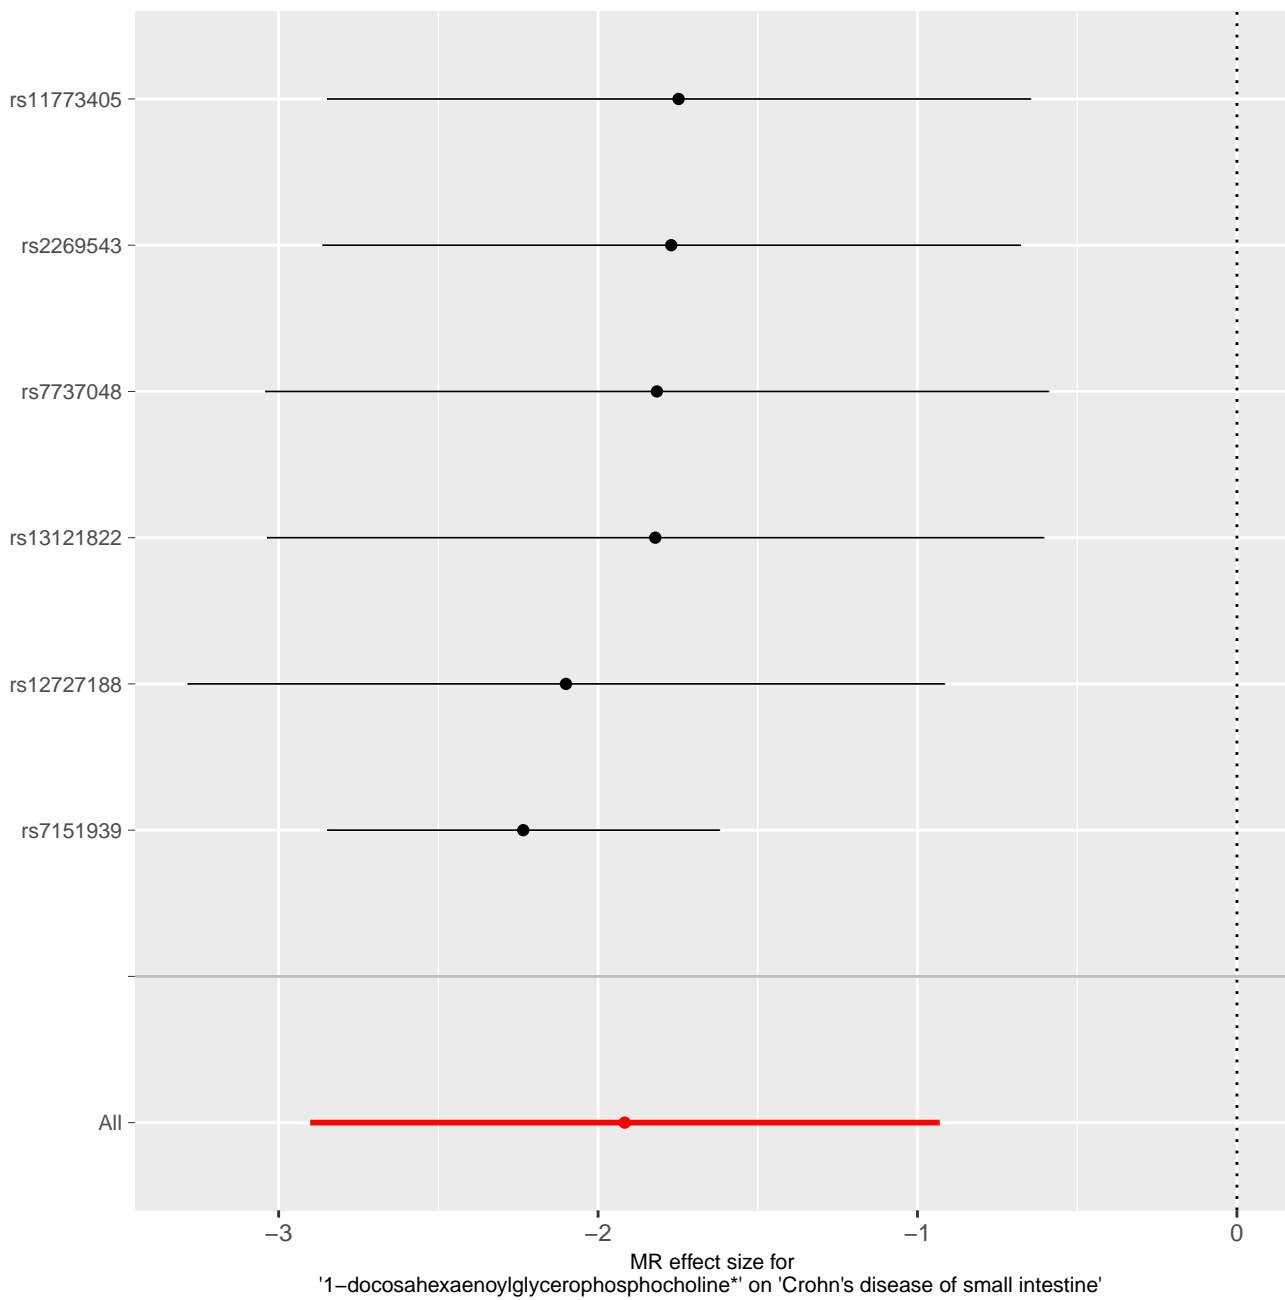

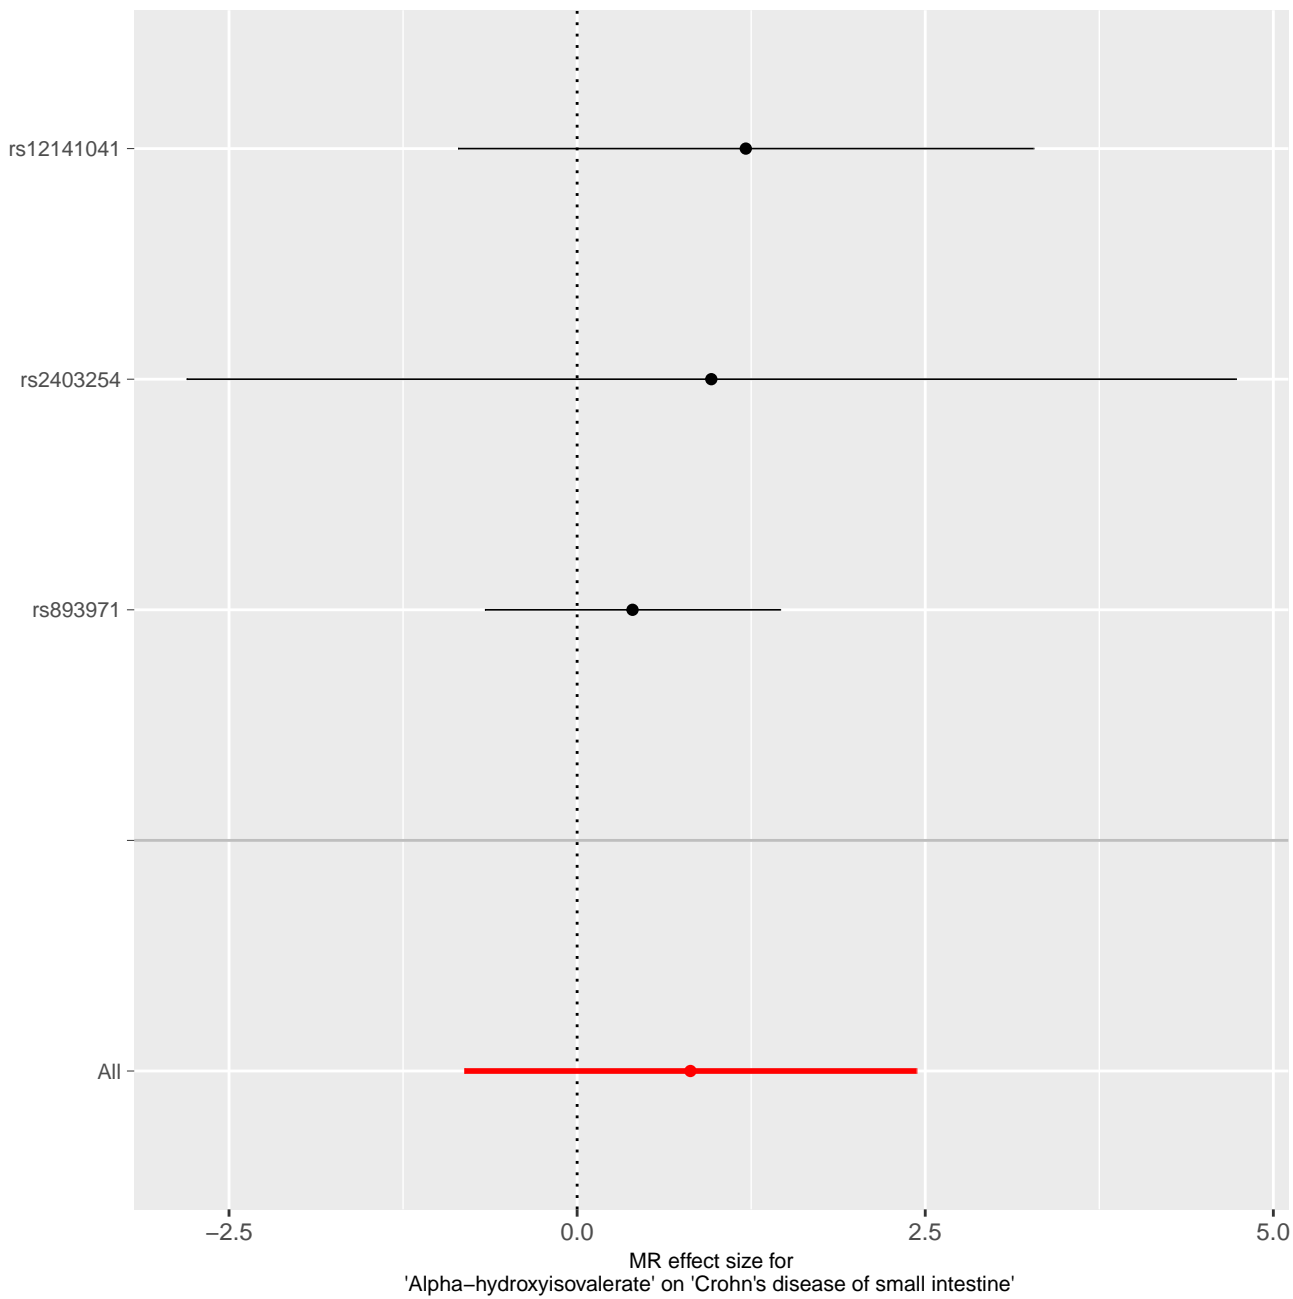

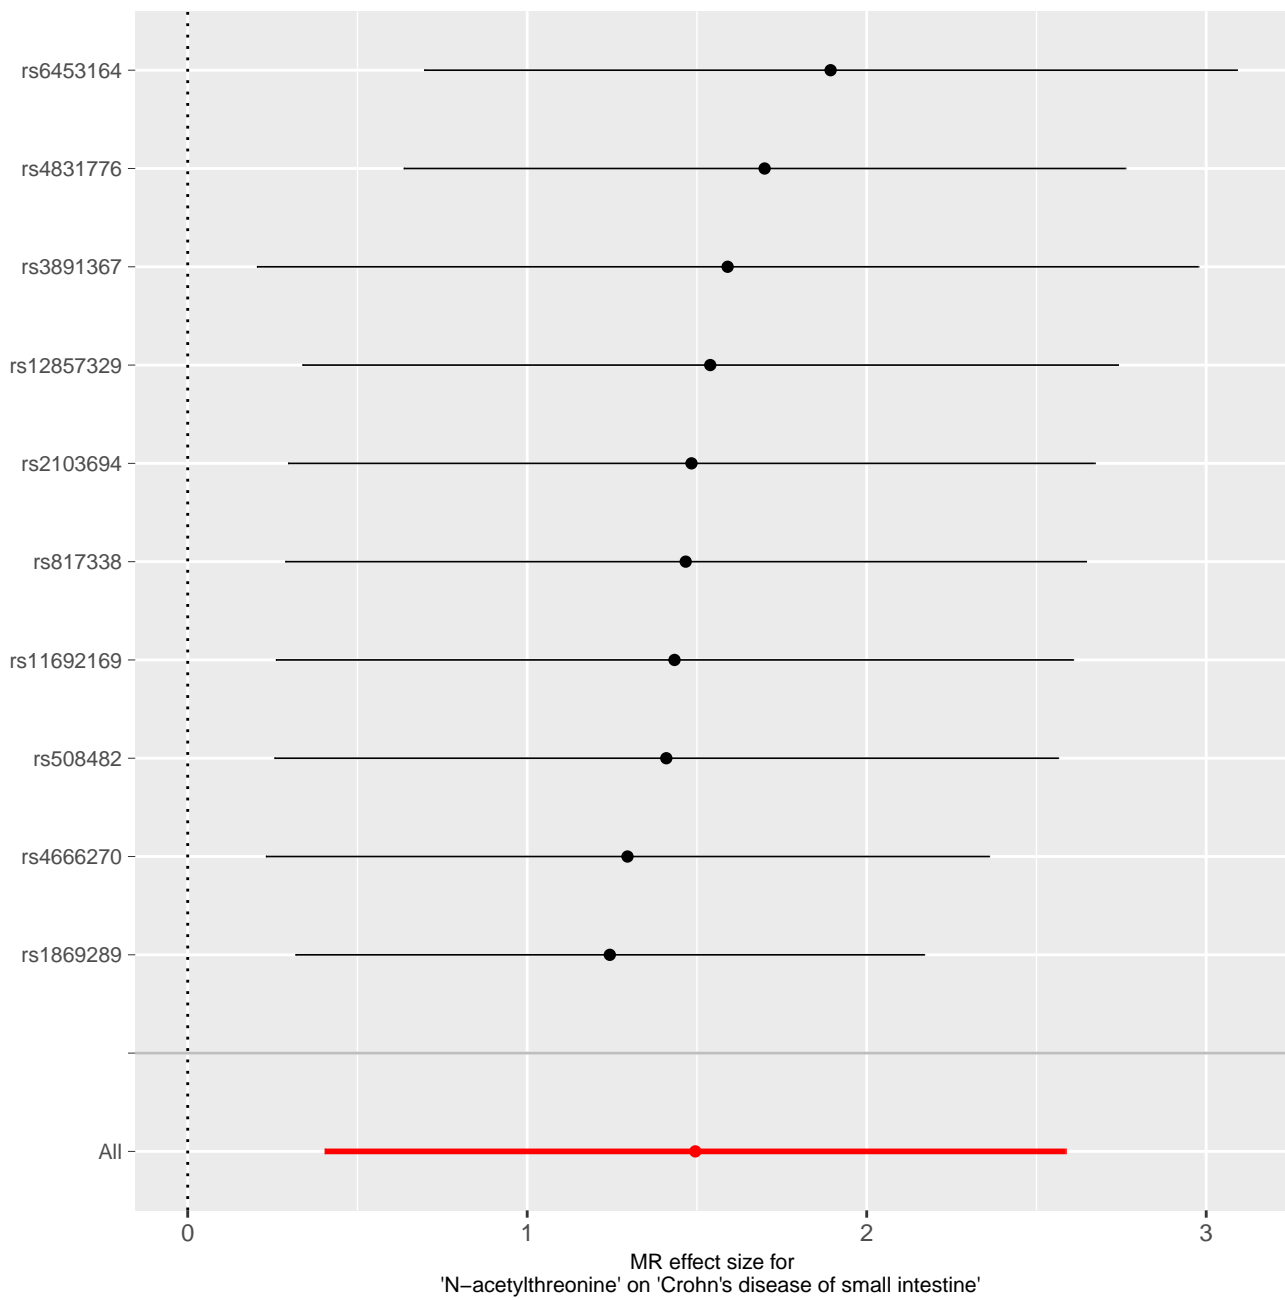



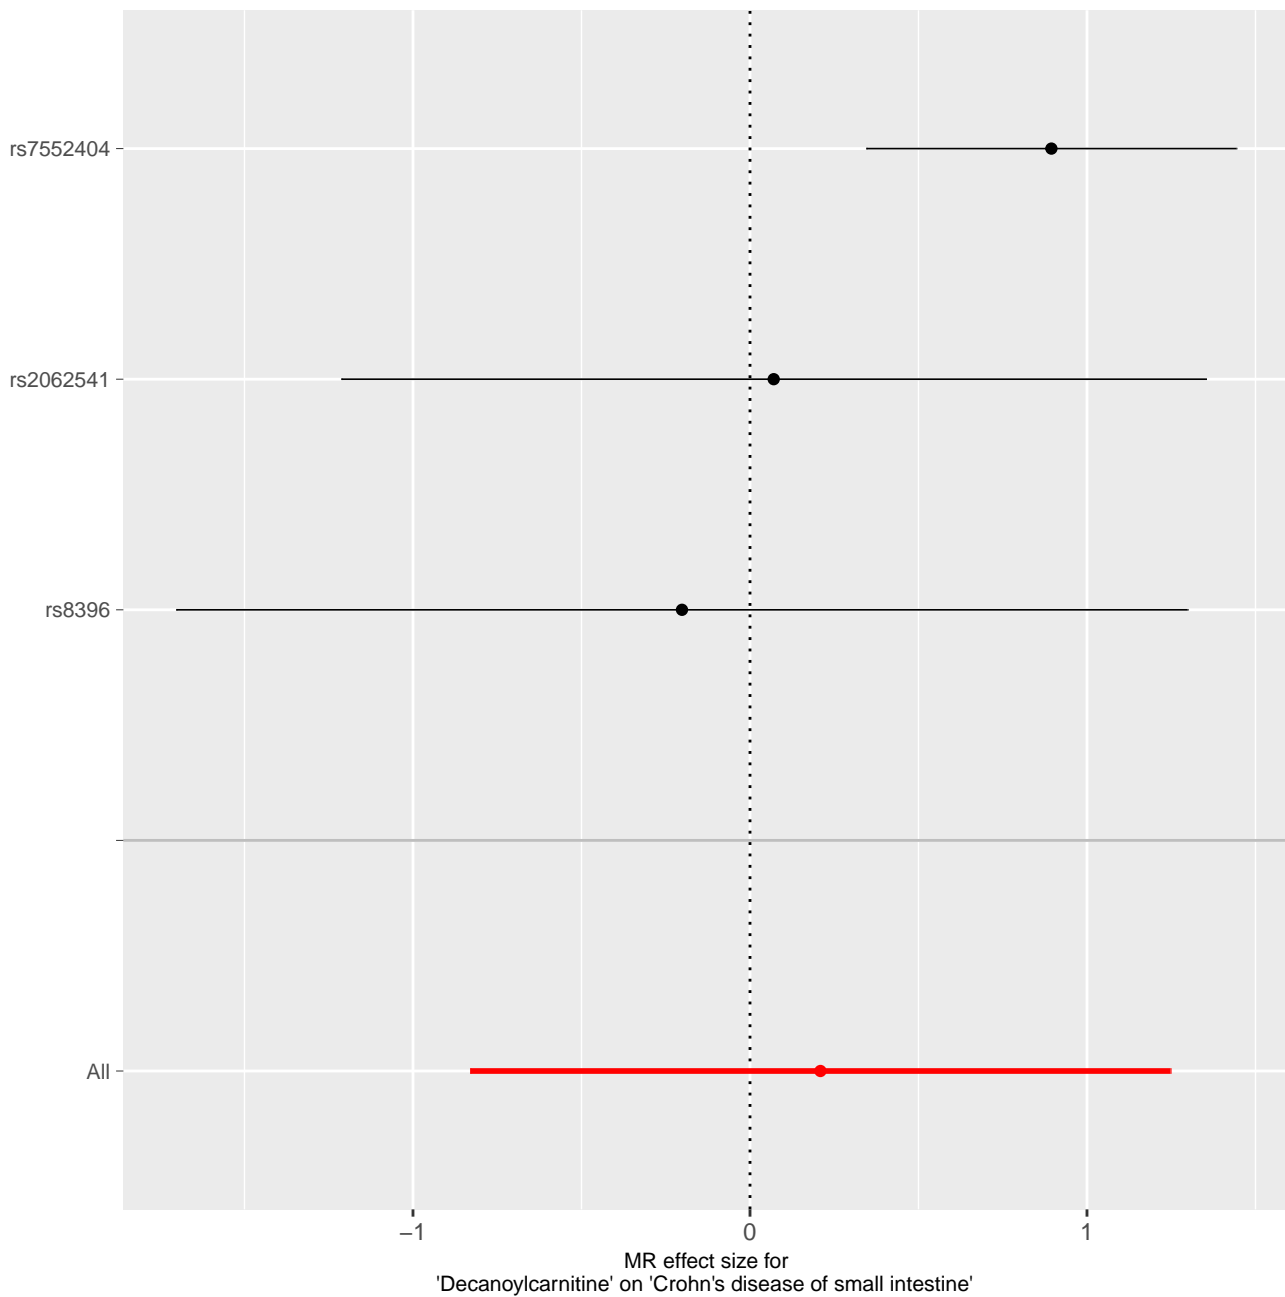

Batch 747 : 1-palmitoylglycerophosphocholine on Crohn's disease of small intestine

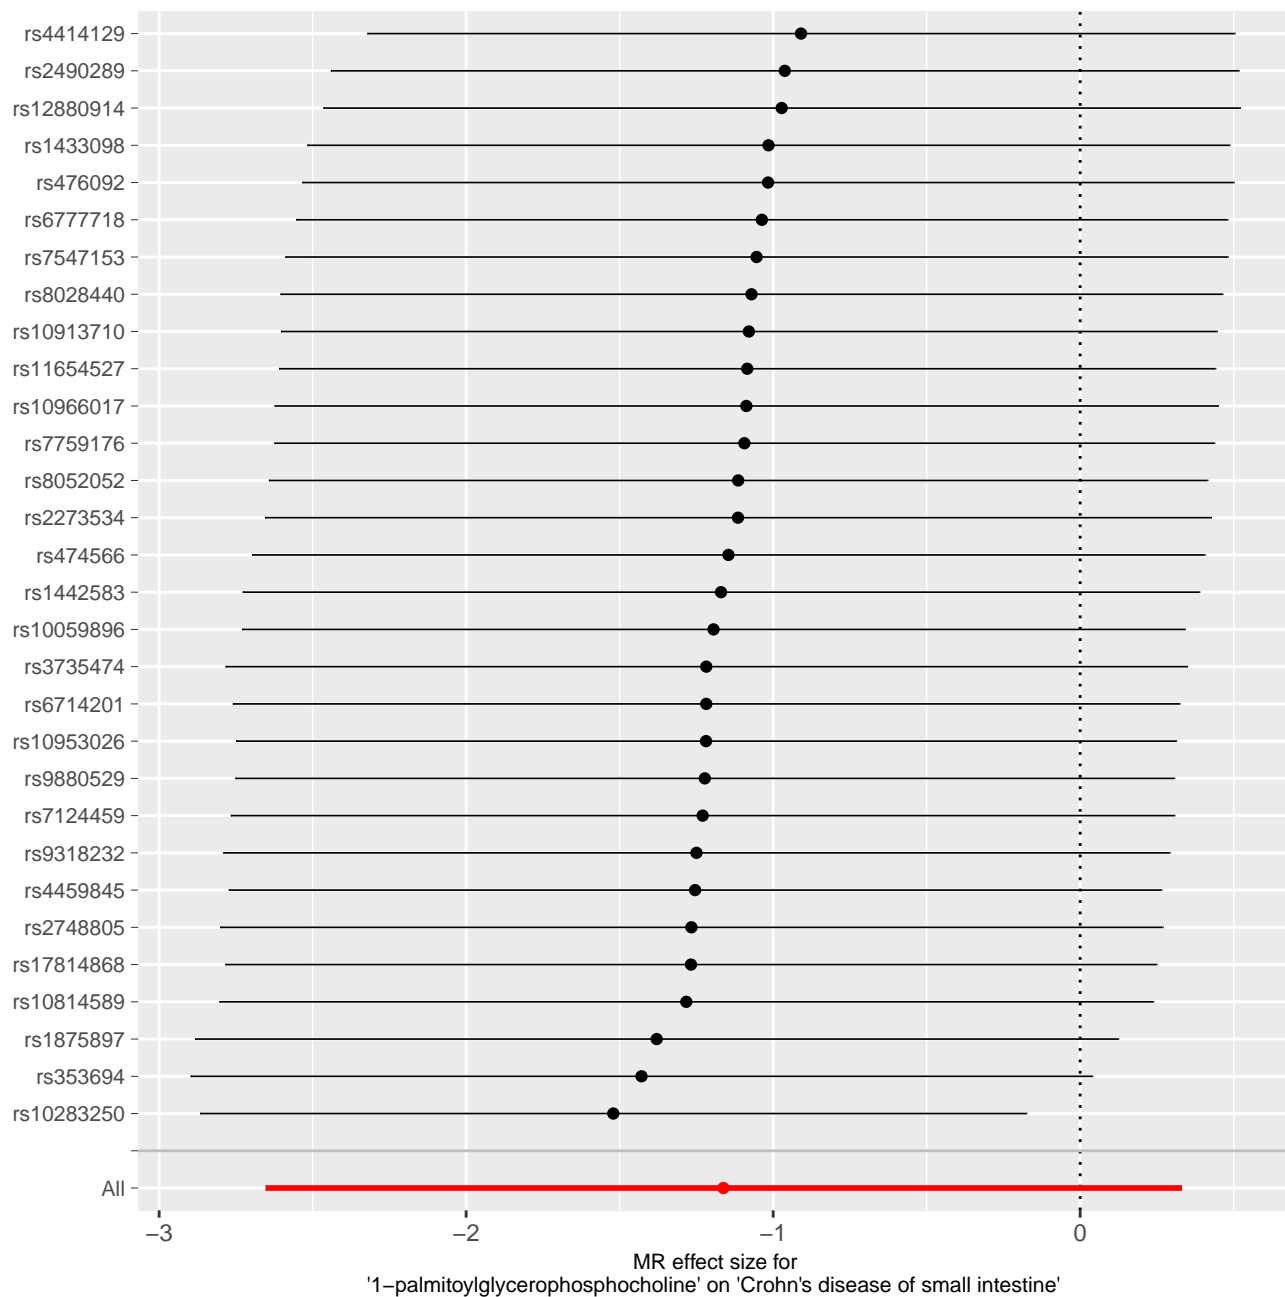

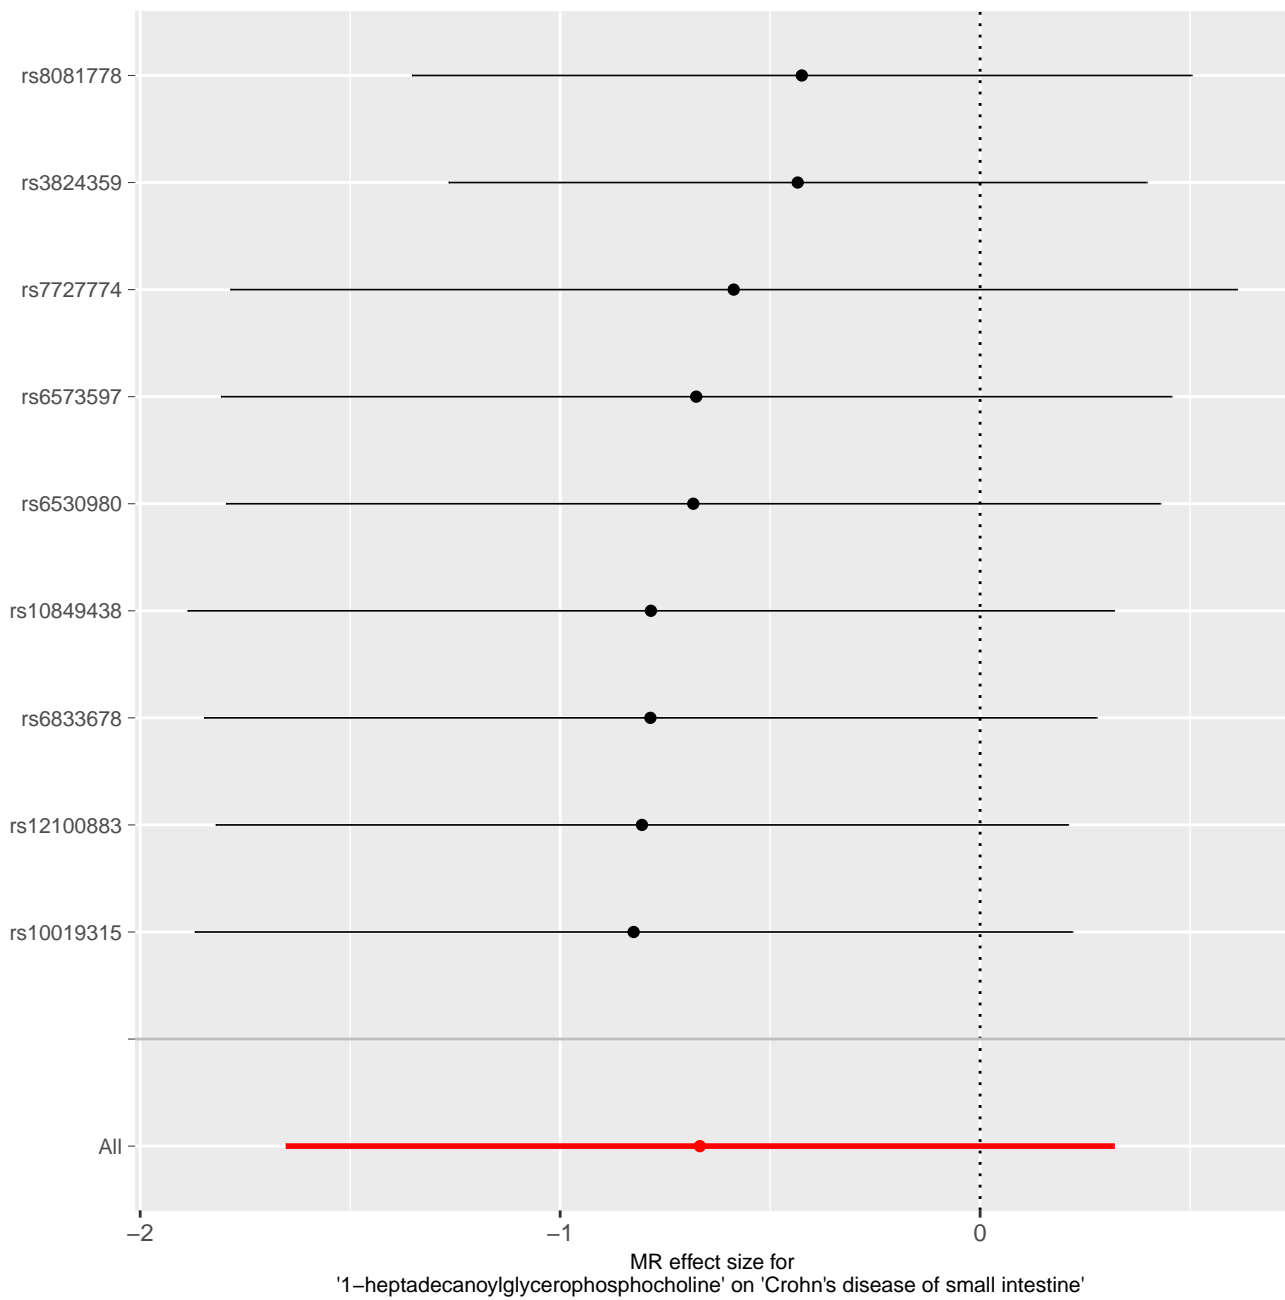

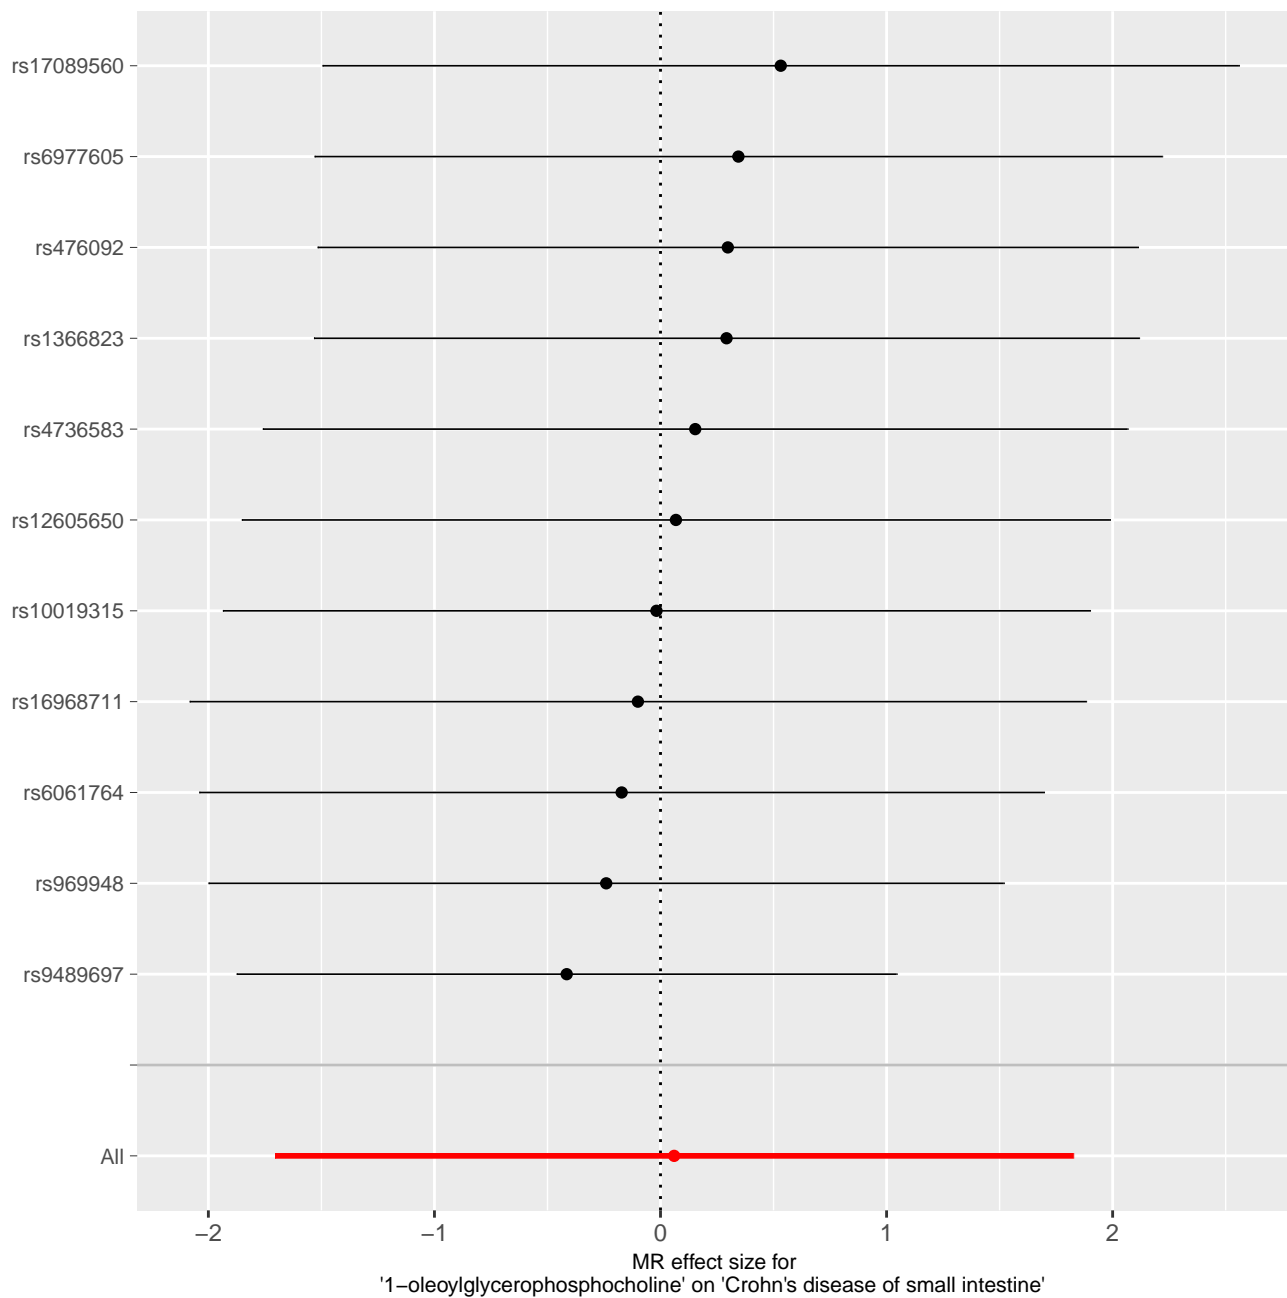

Batch 750 : 1-stearoylglycerophosphocholine on Crohn's disease of small intestine

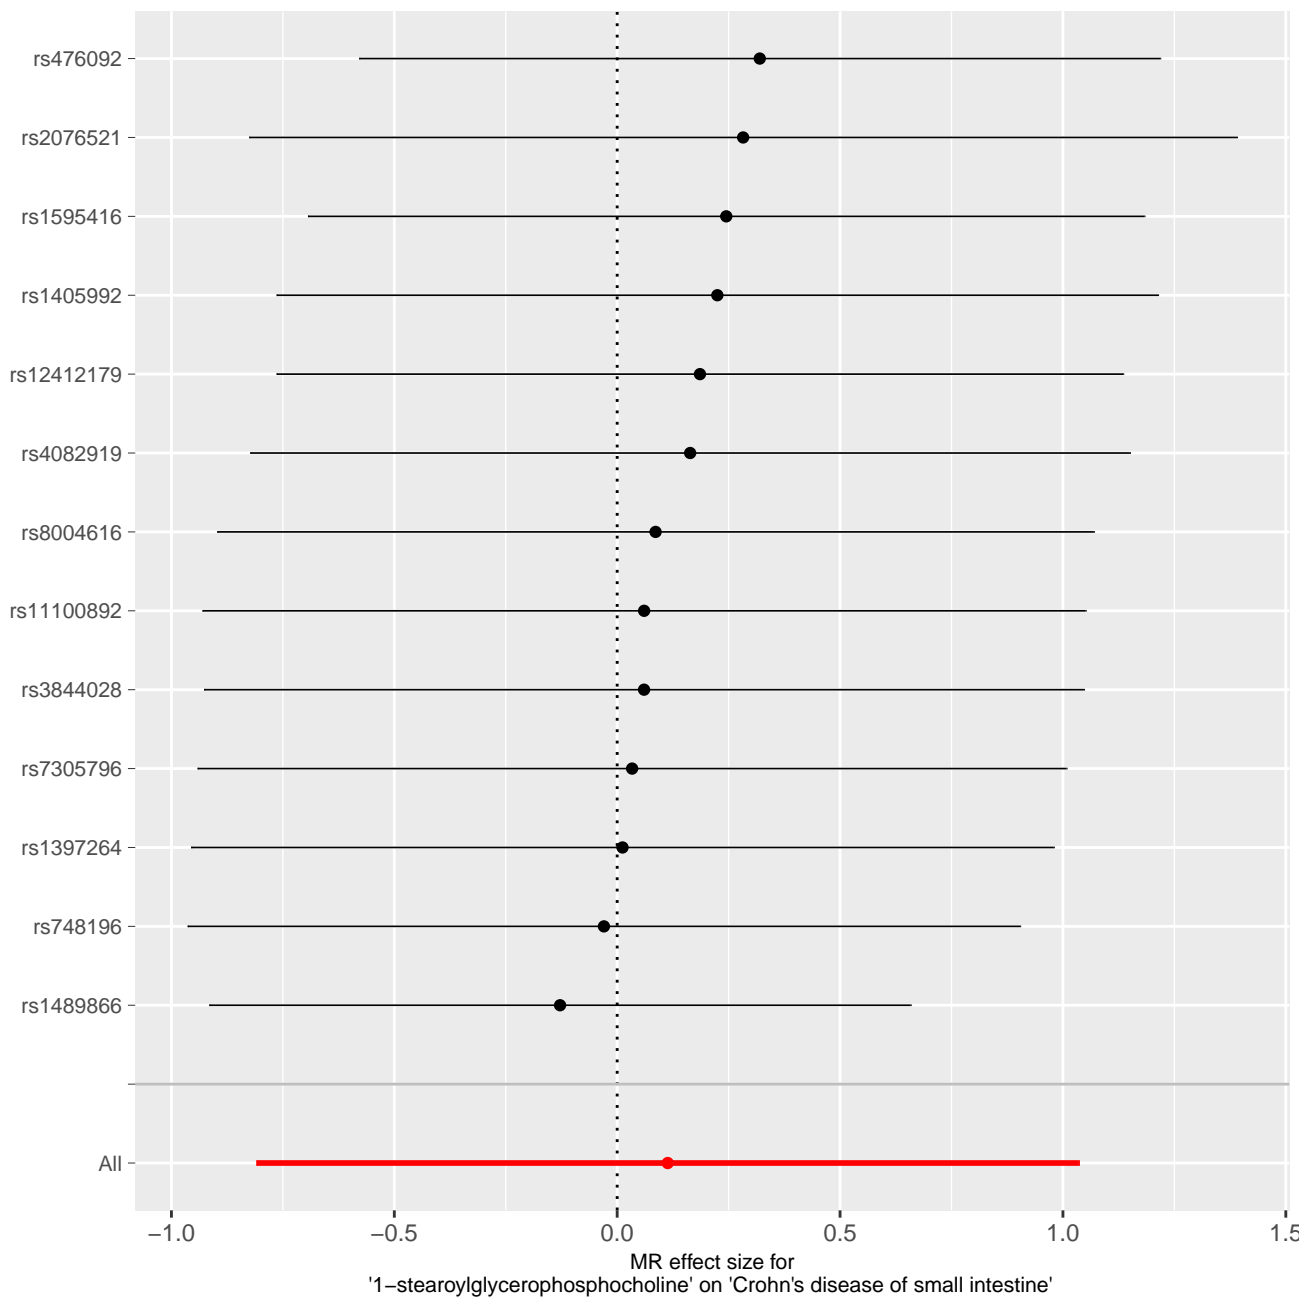

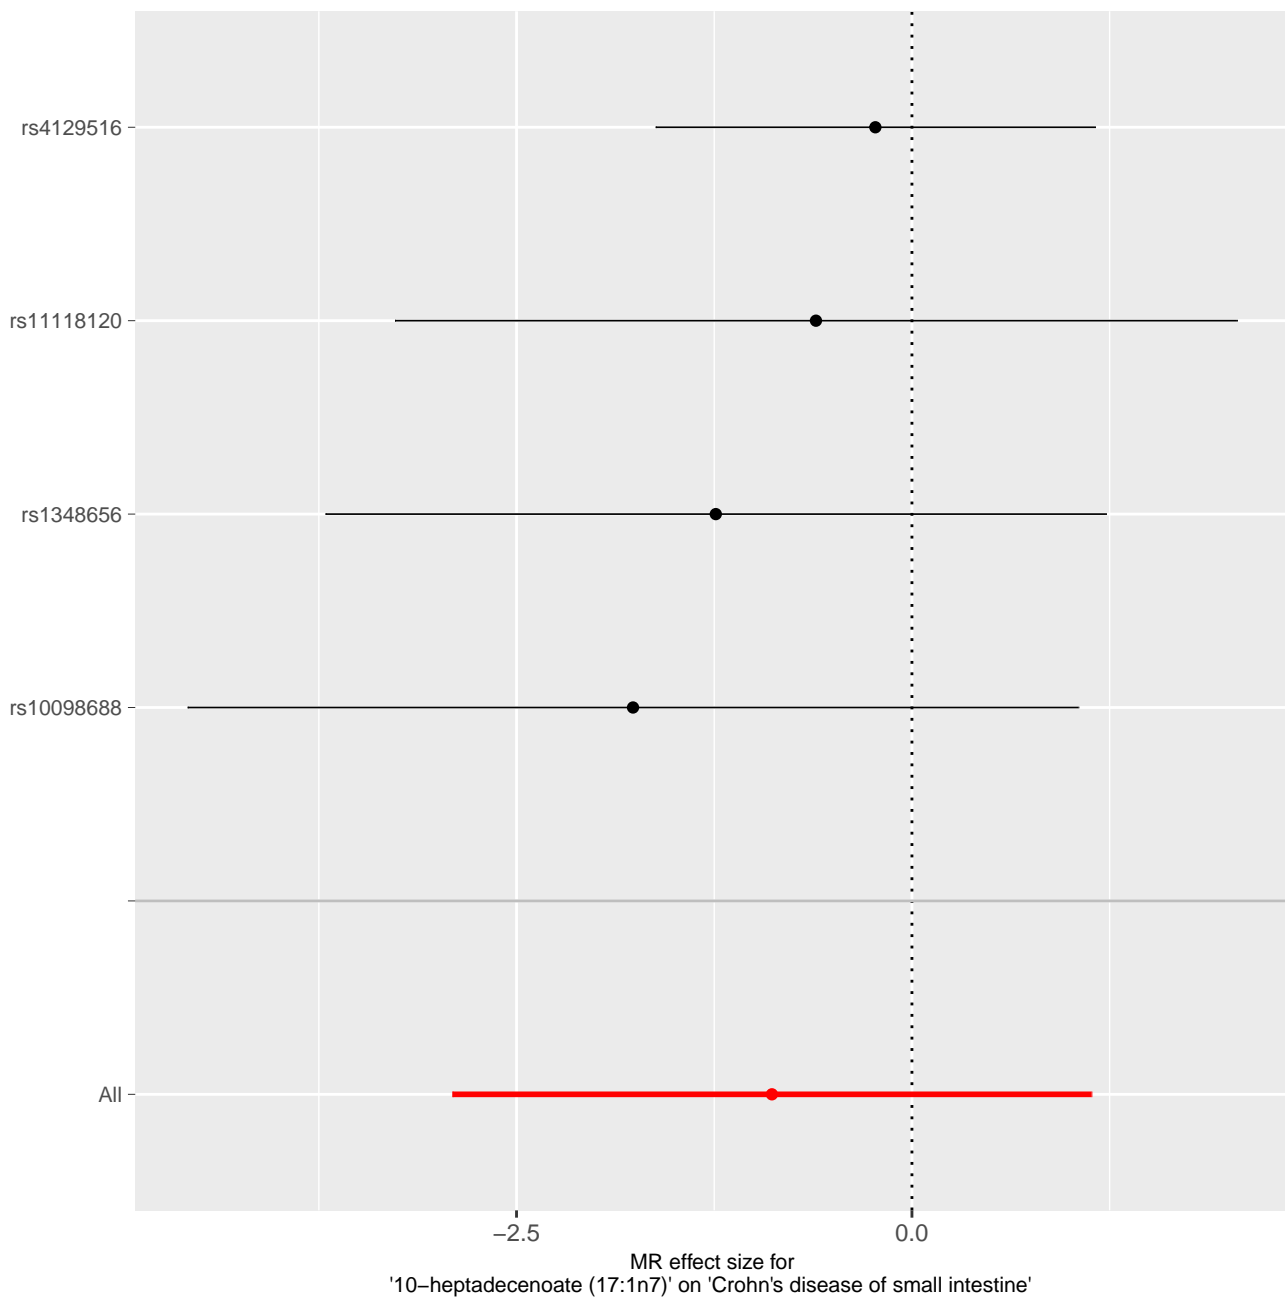

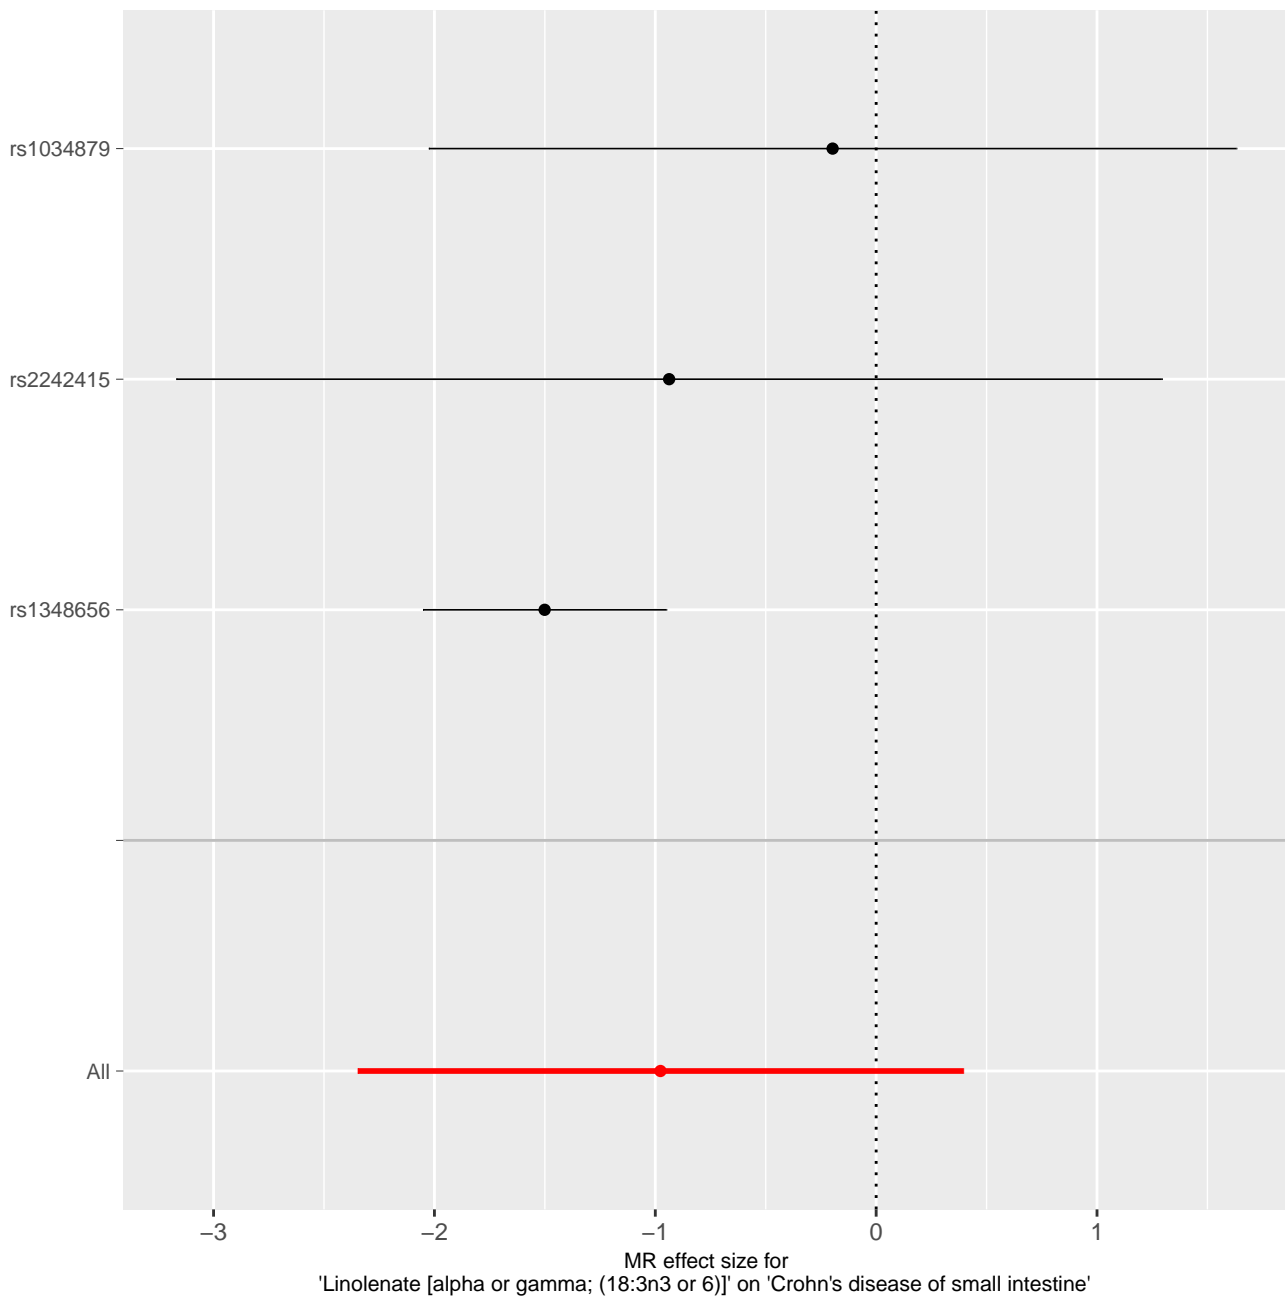

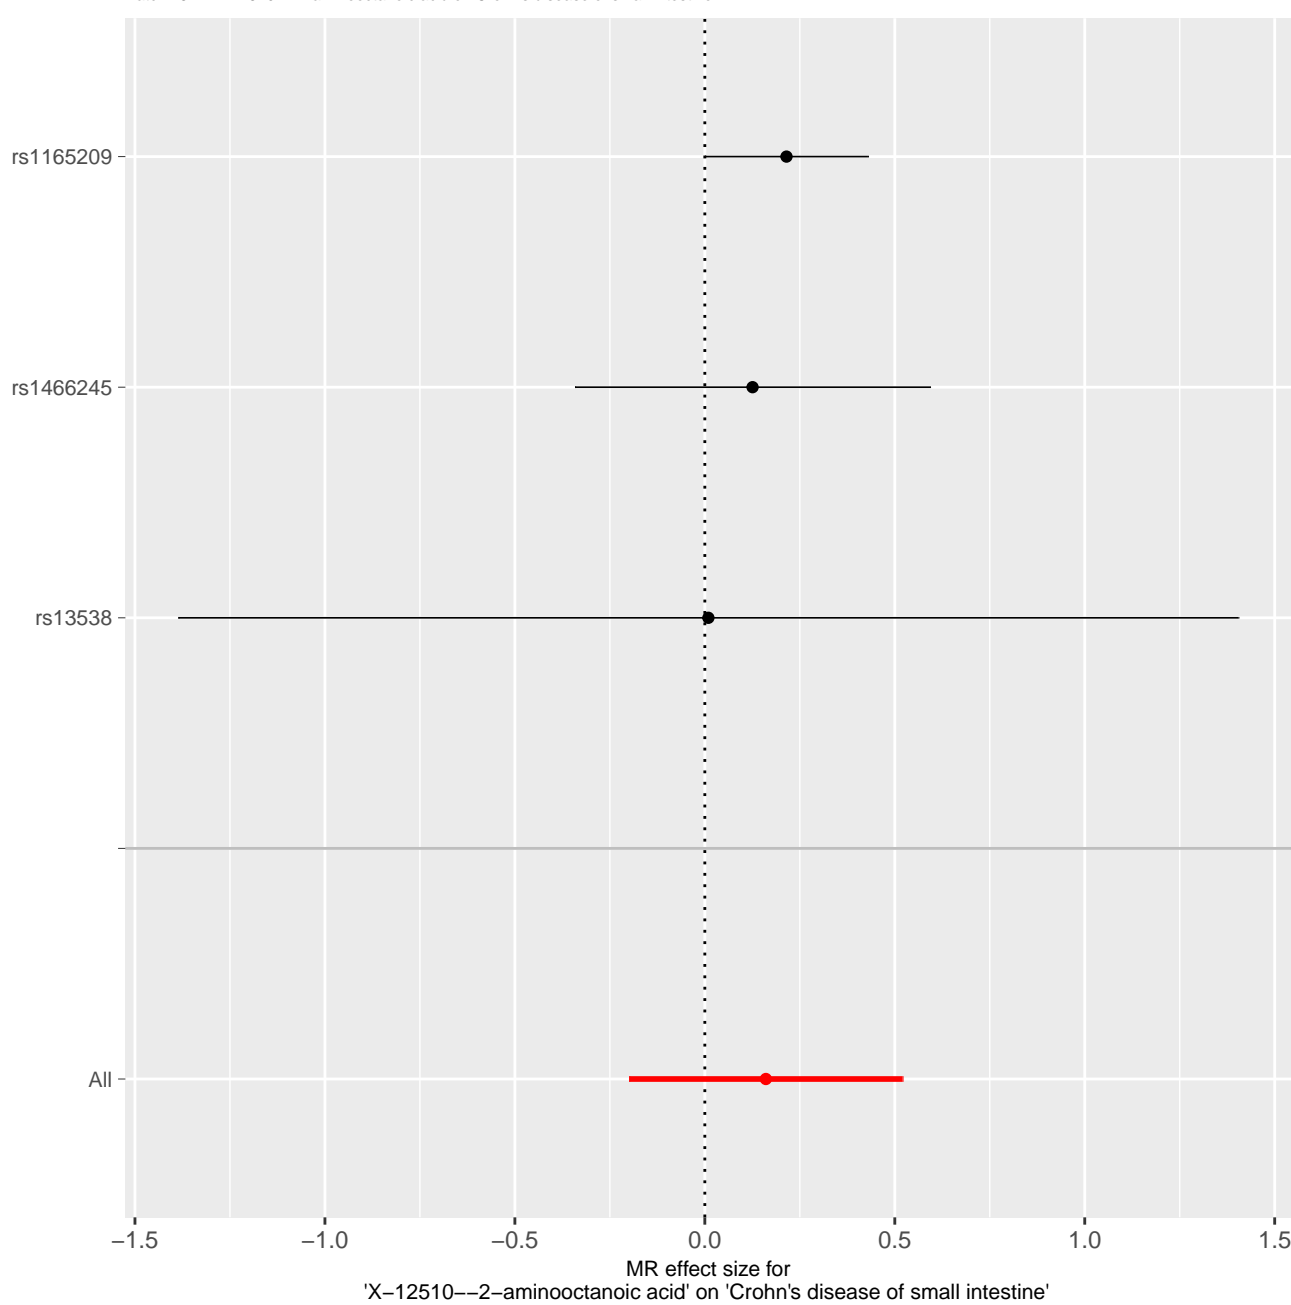



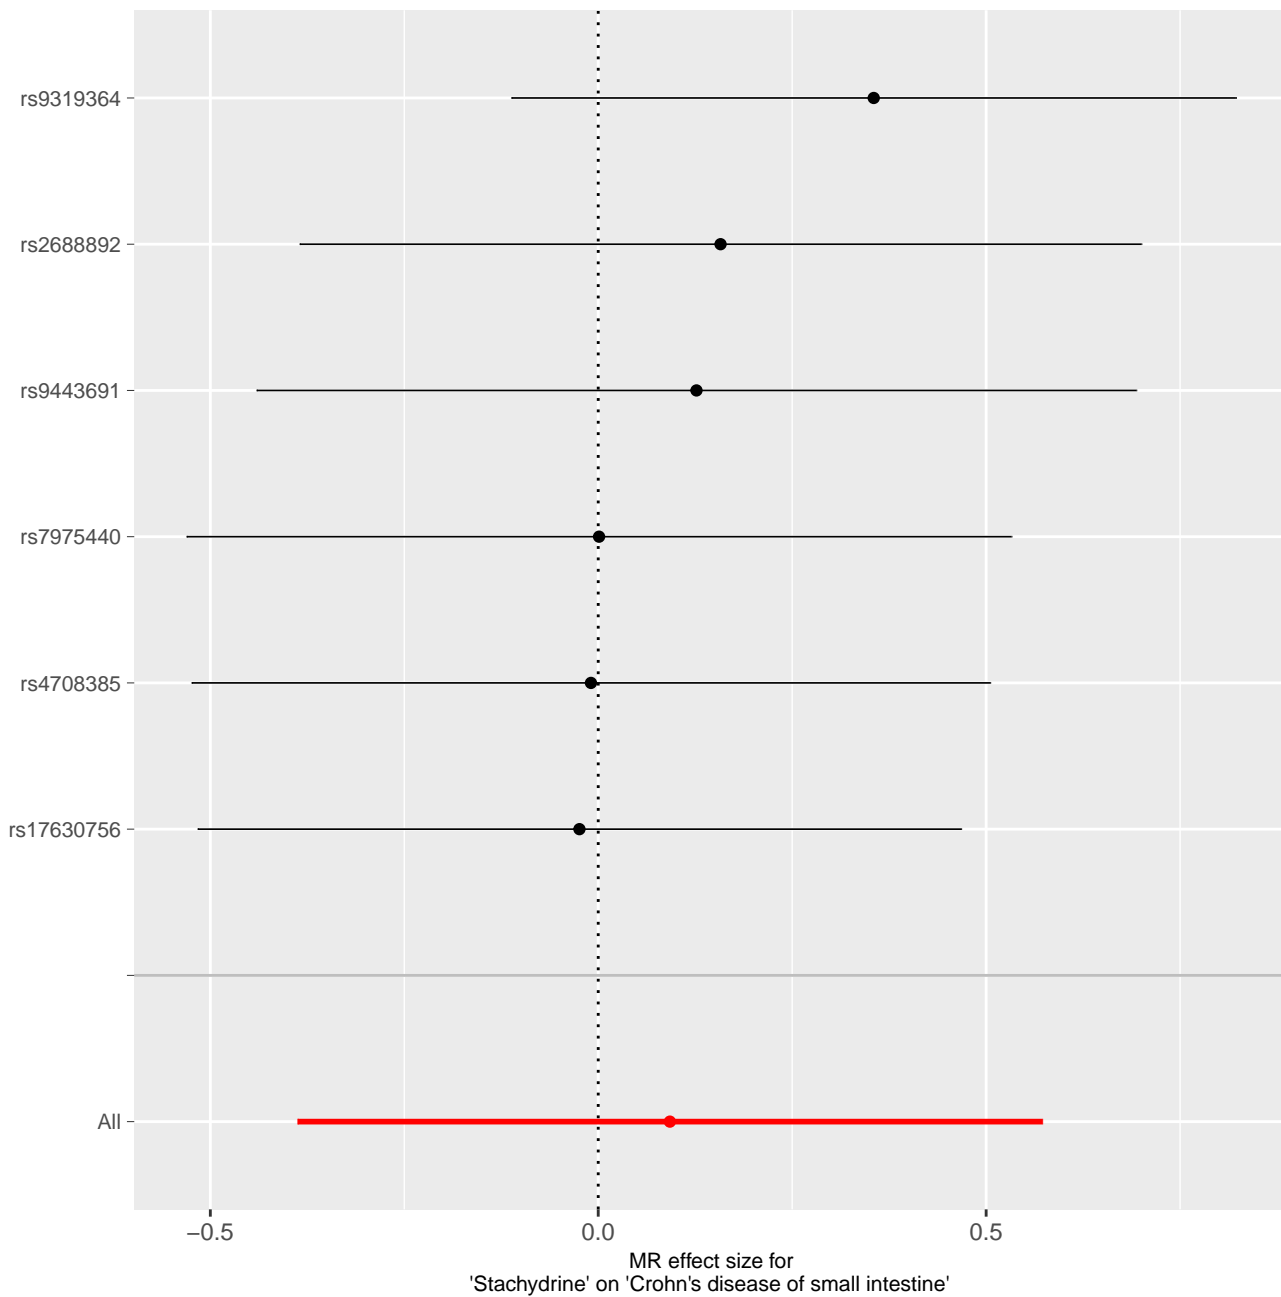

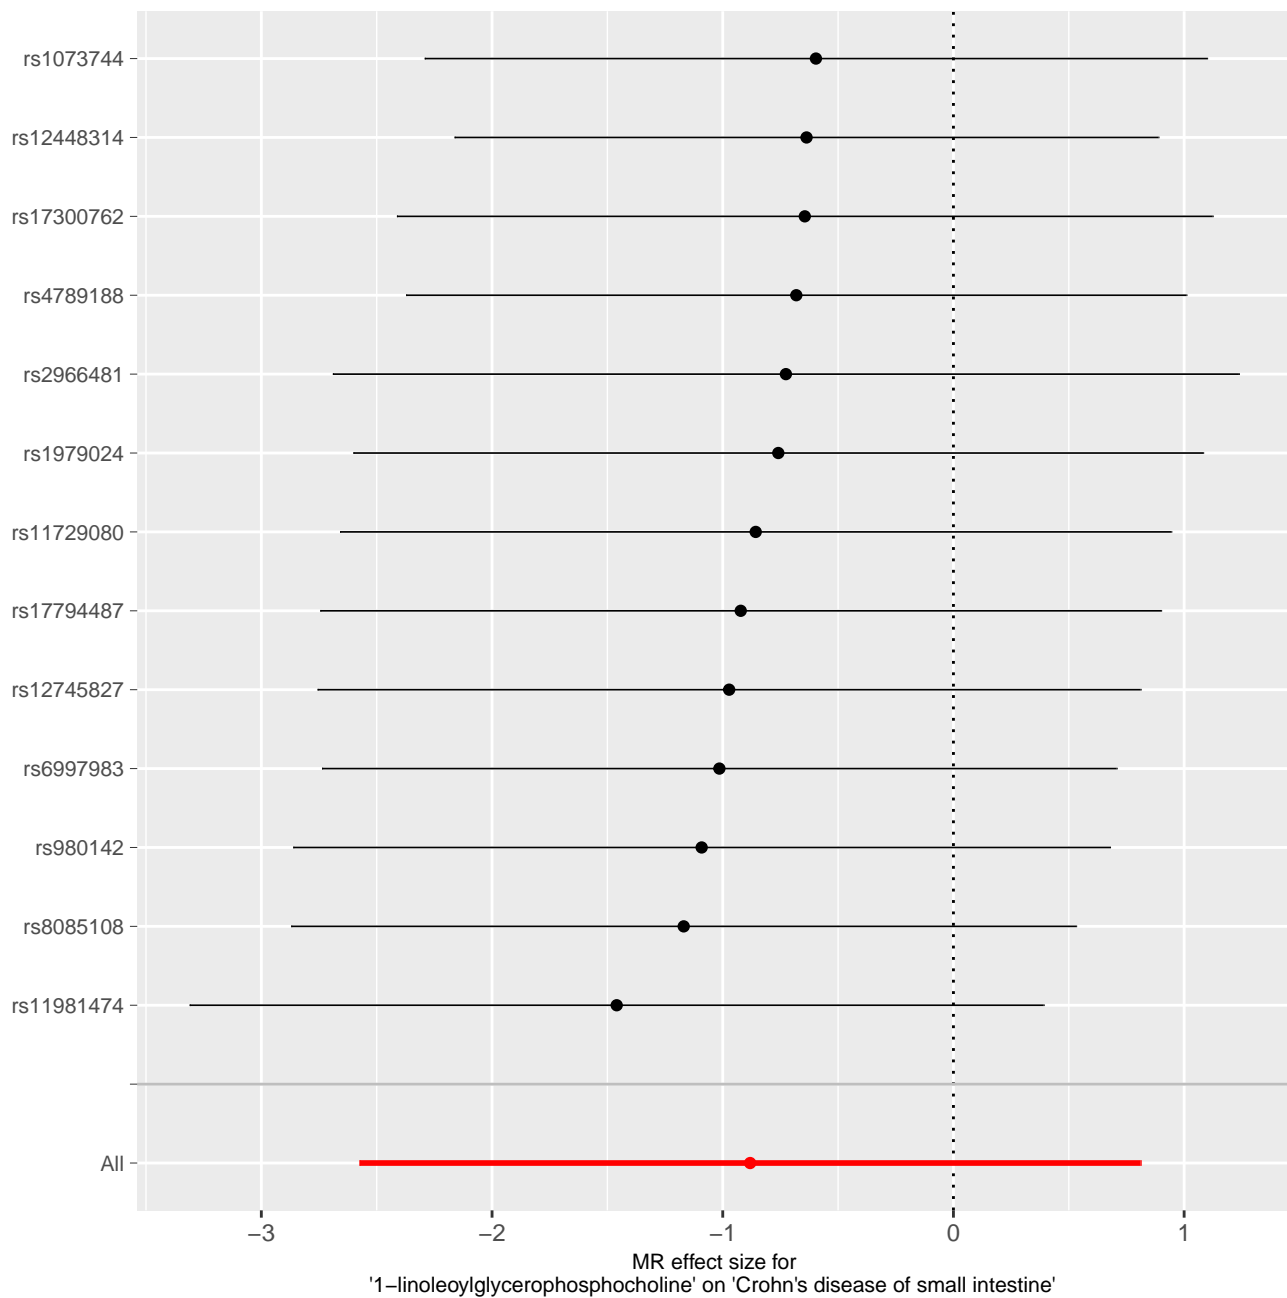

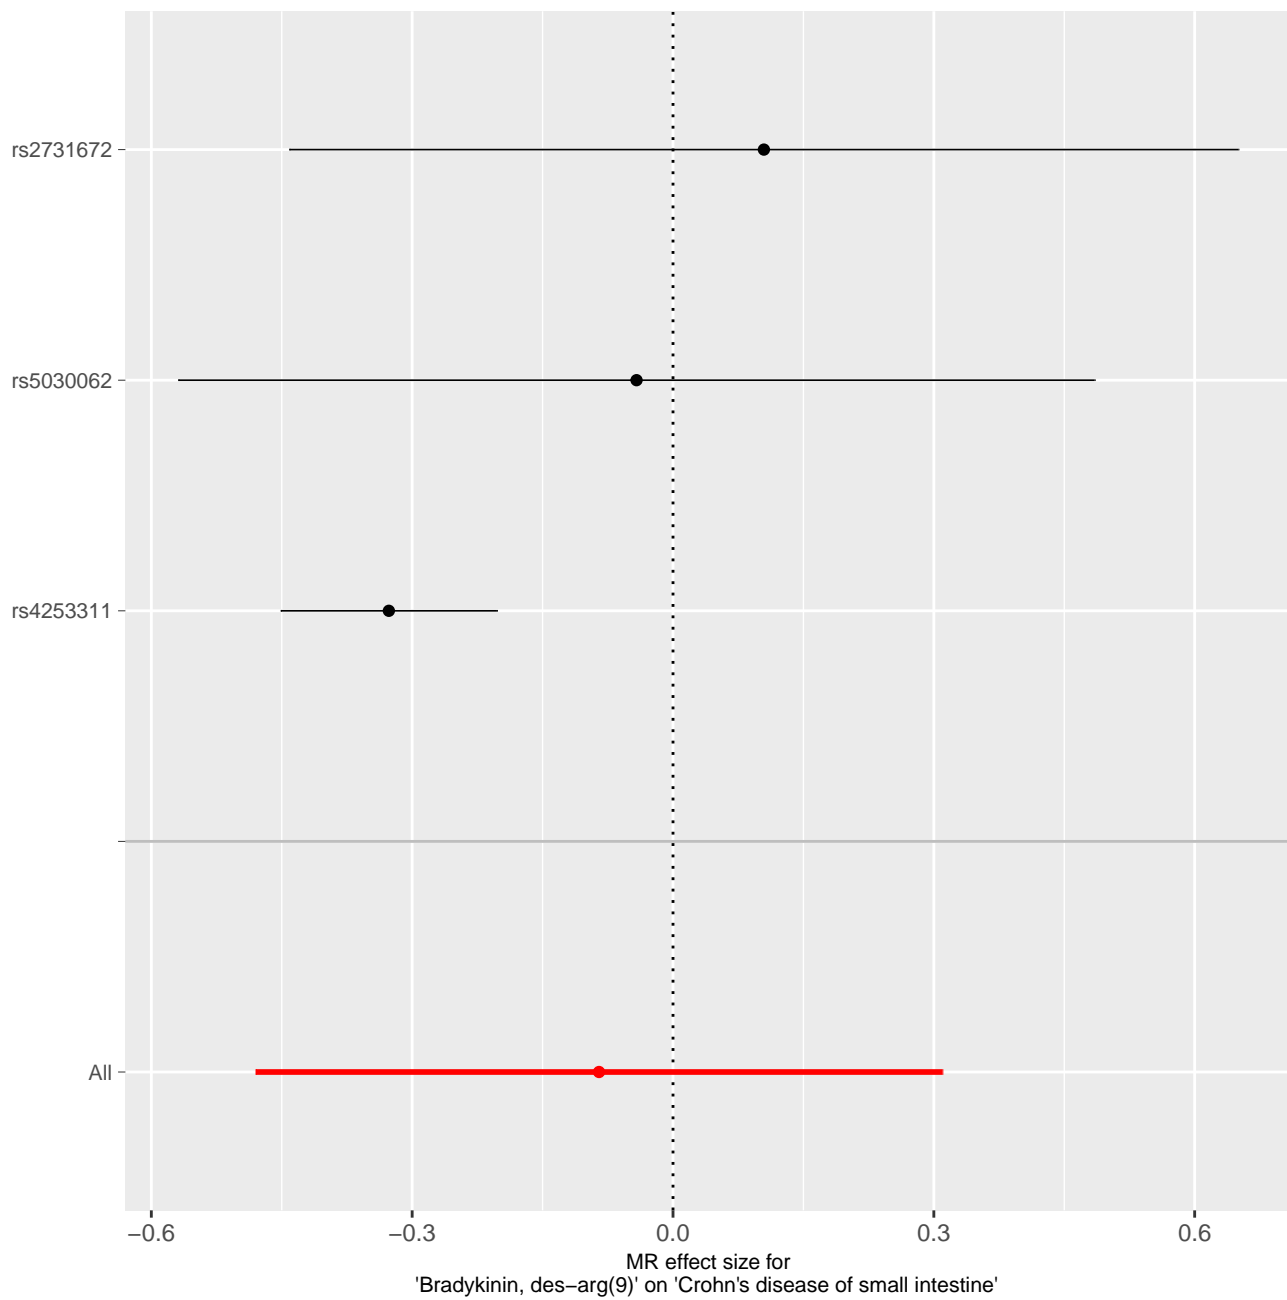

Batch 767 : Gamma-glutamylisoleucine\* on Crohn's disease of small intestine

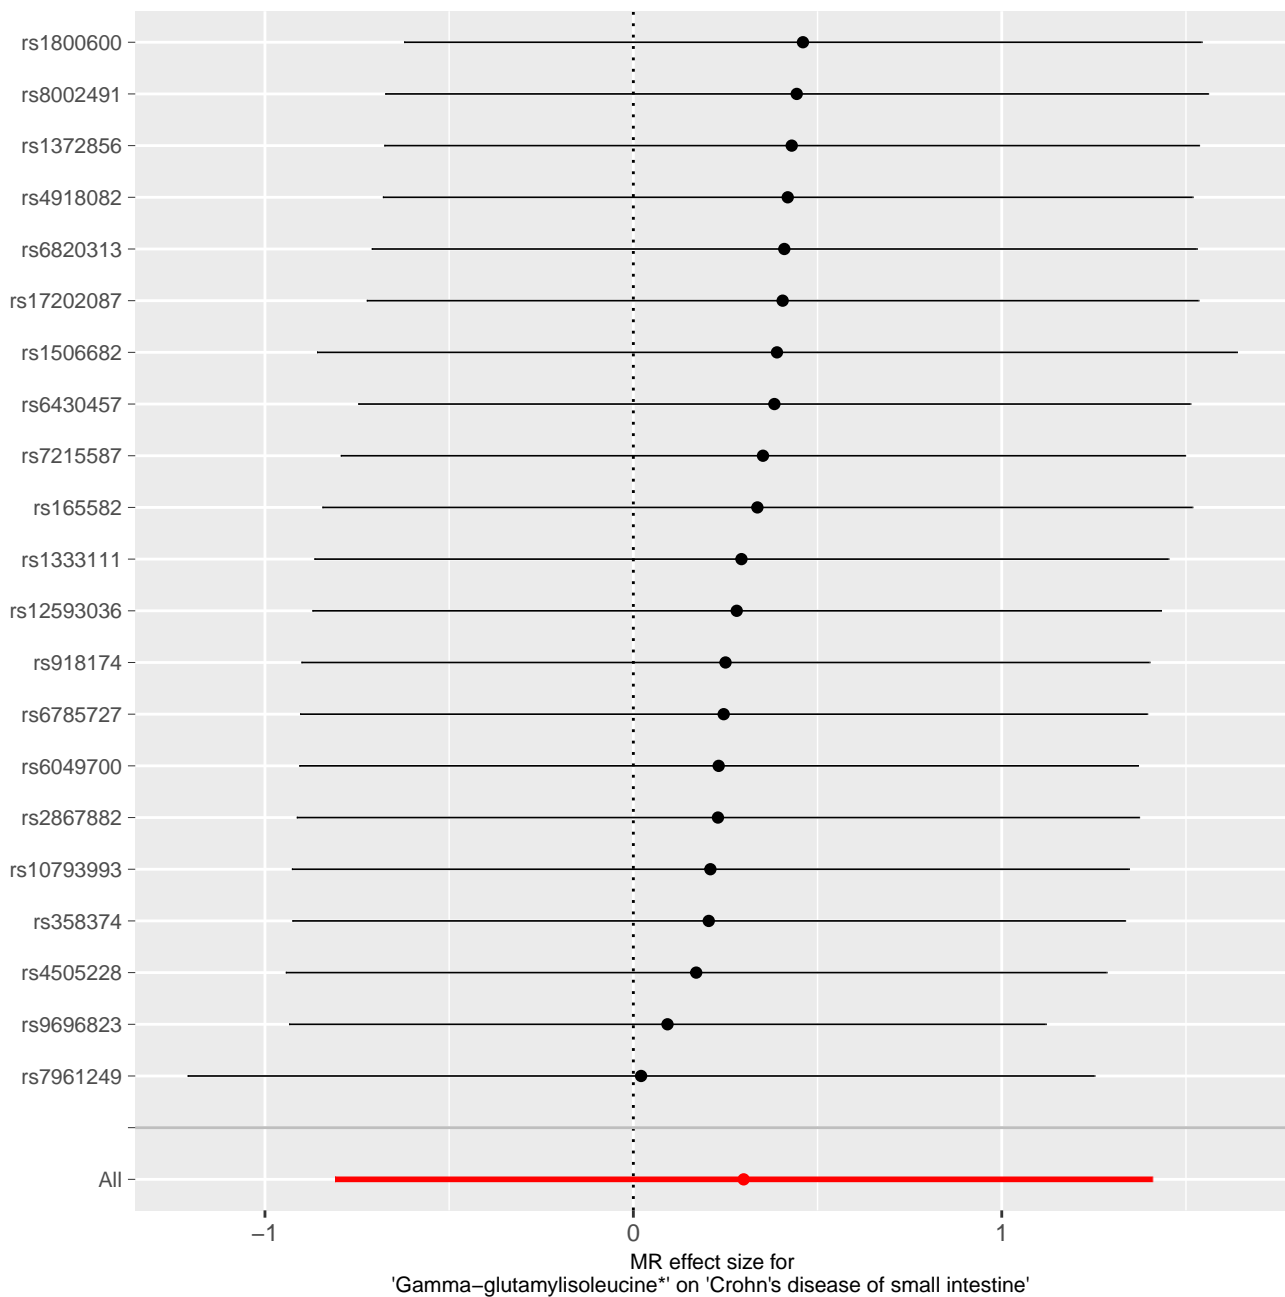

rs6907935

rs4680092

rs4861137

rs1456197

All

-4

-2

0

2

MR effect size for  
'Isovalerate' on 'Crohn's disease of small intestine'

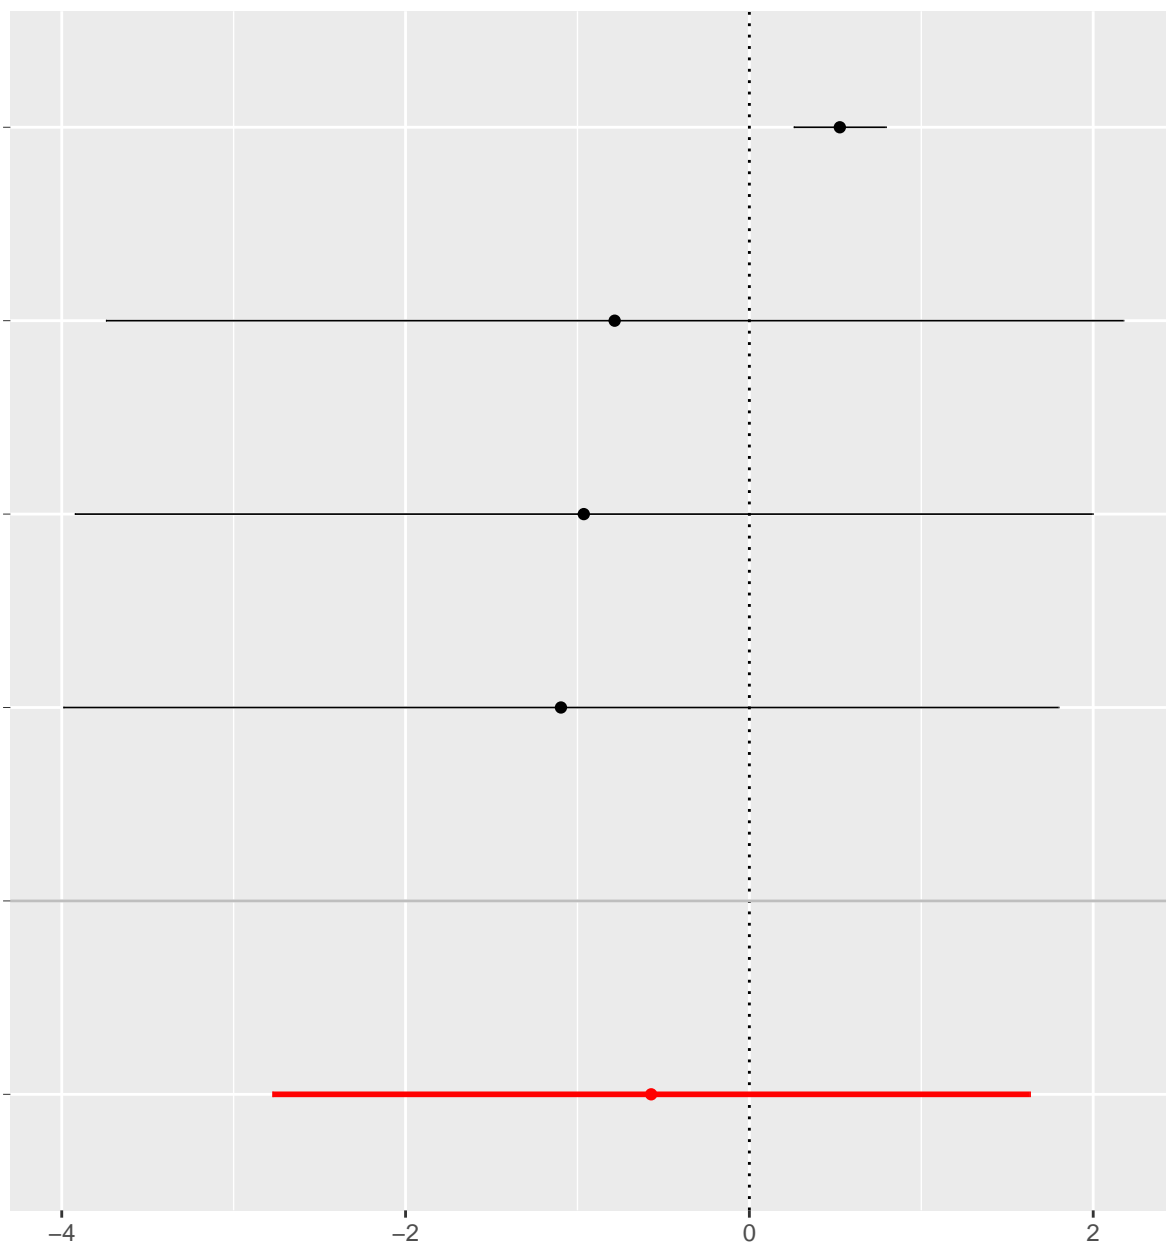

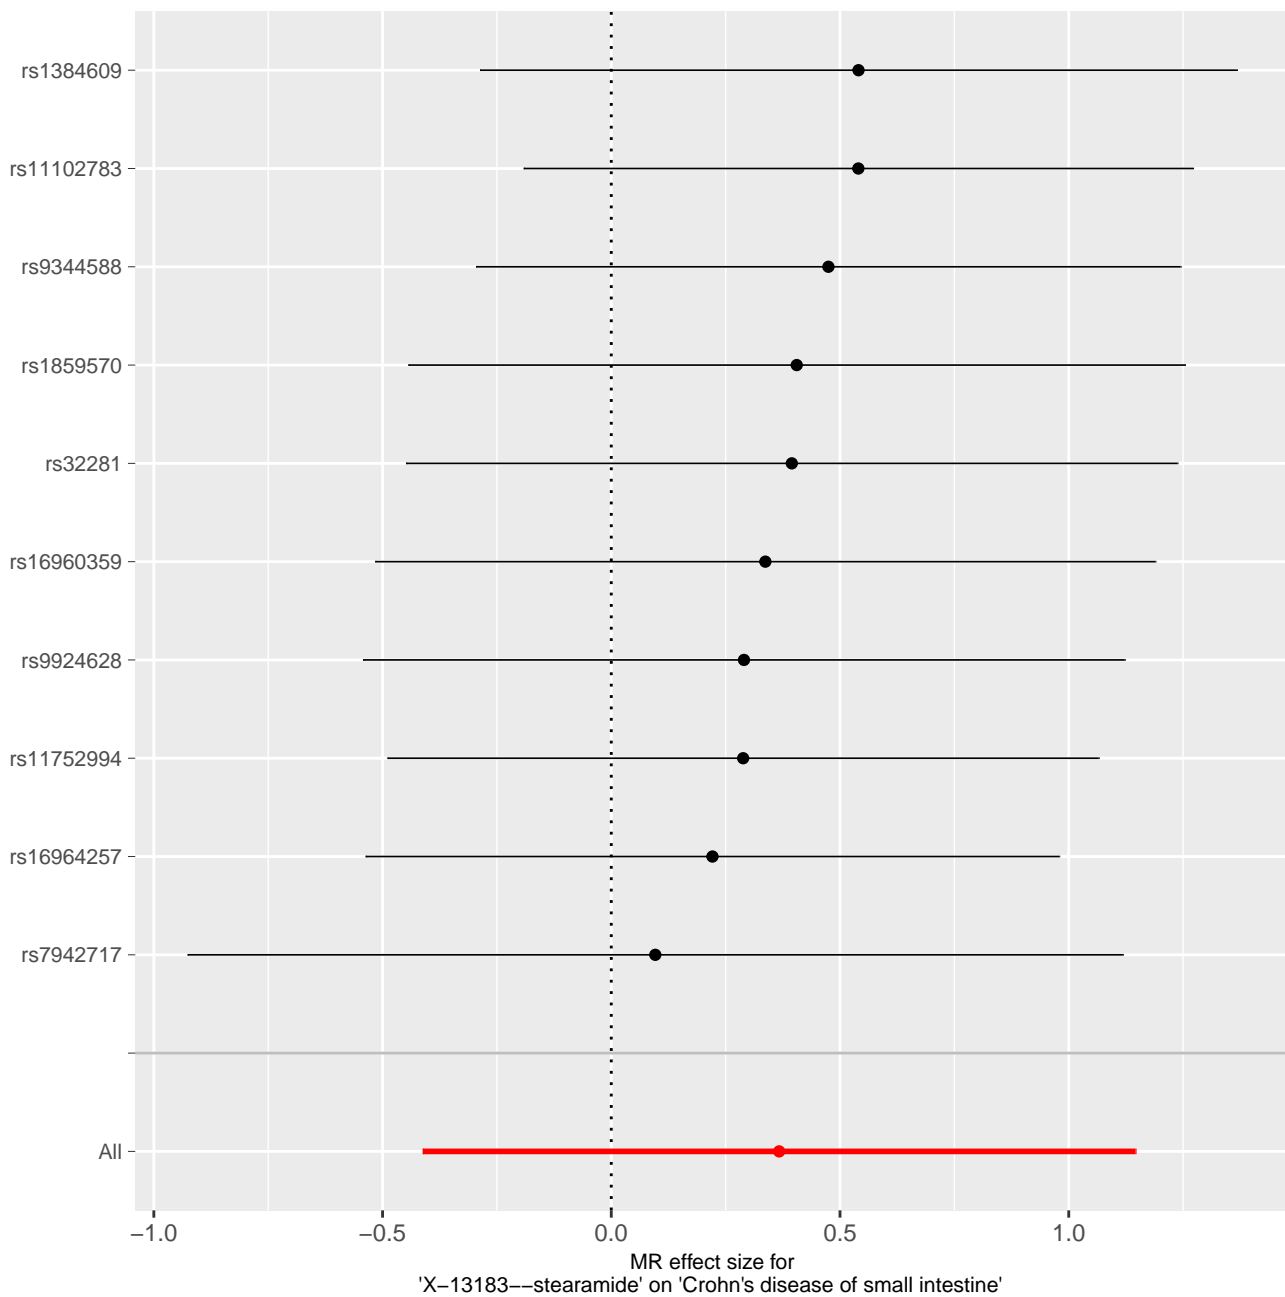

Batch 772 : 7-methylguanine on Crohn's disease of small intestine

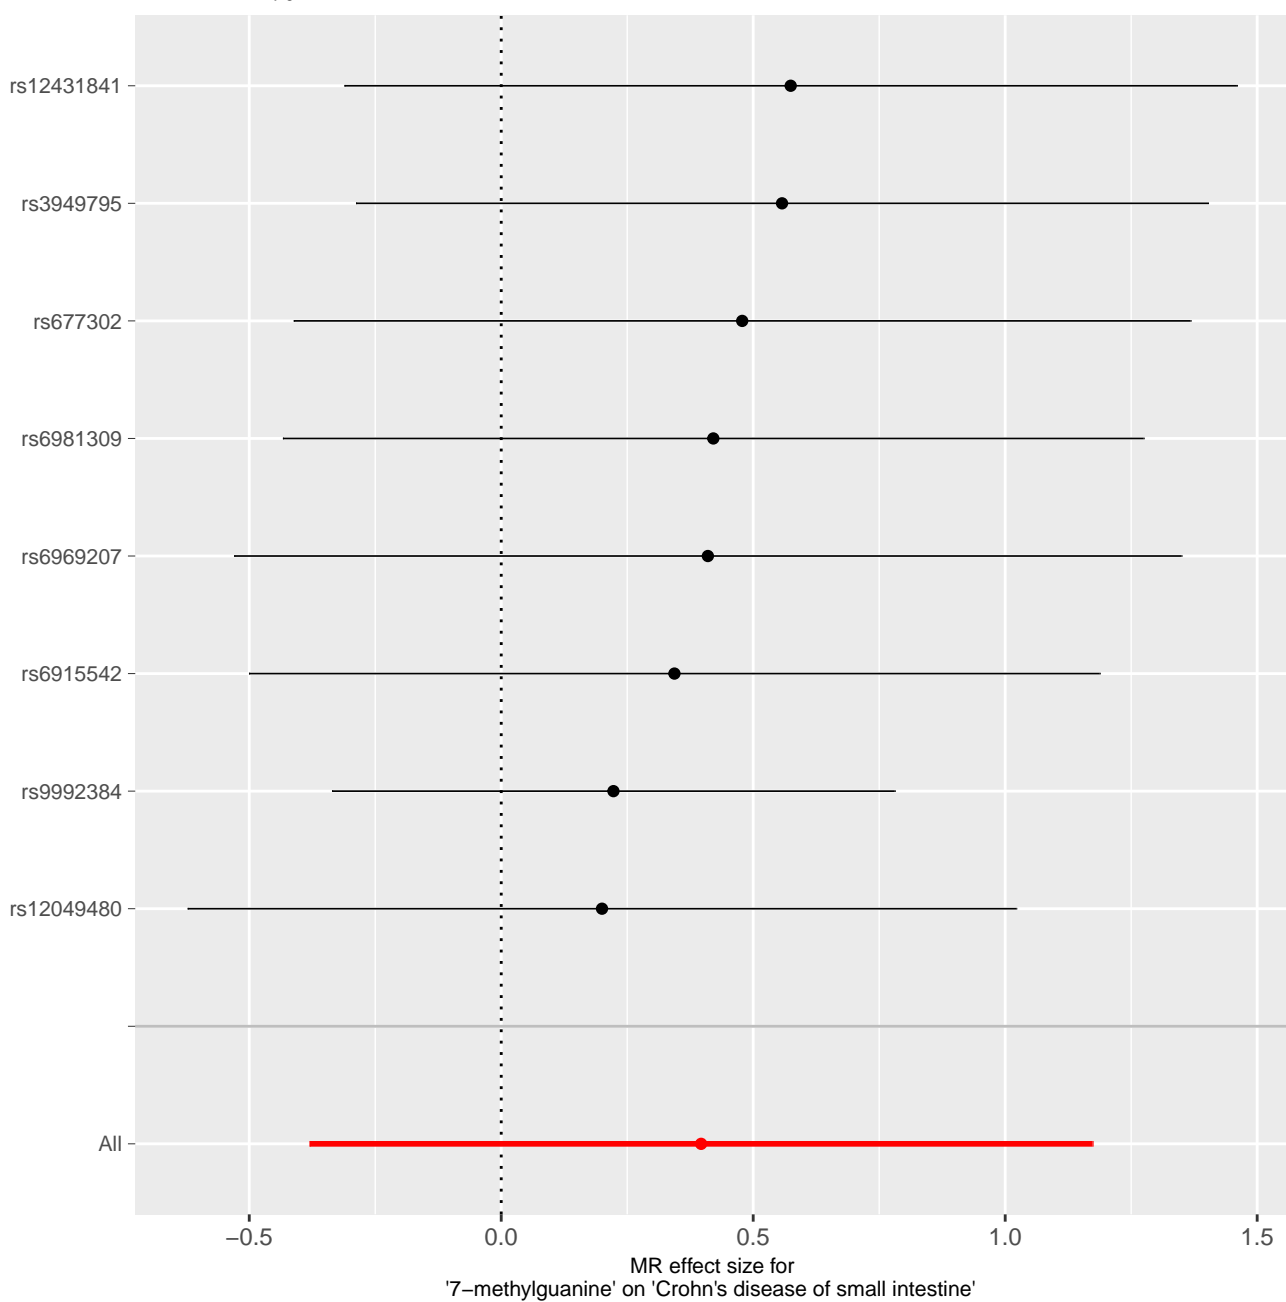

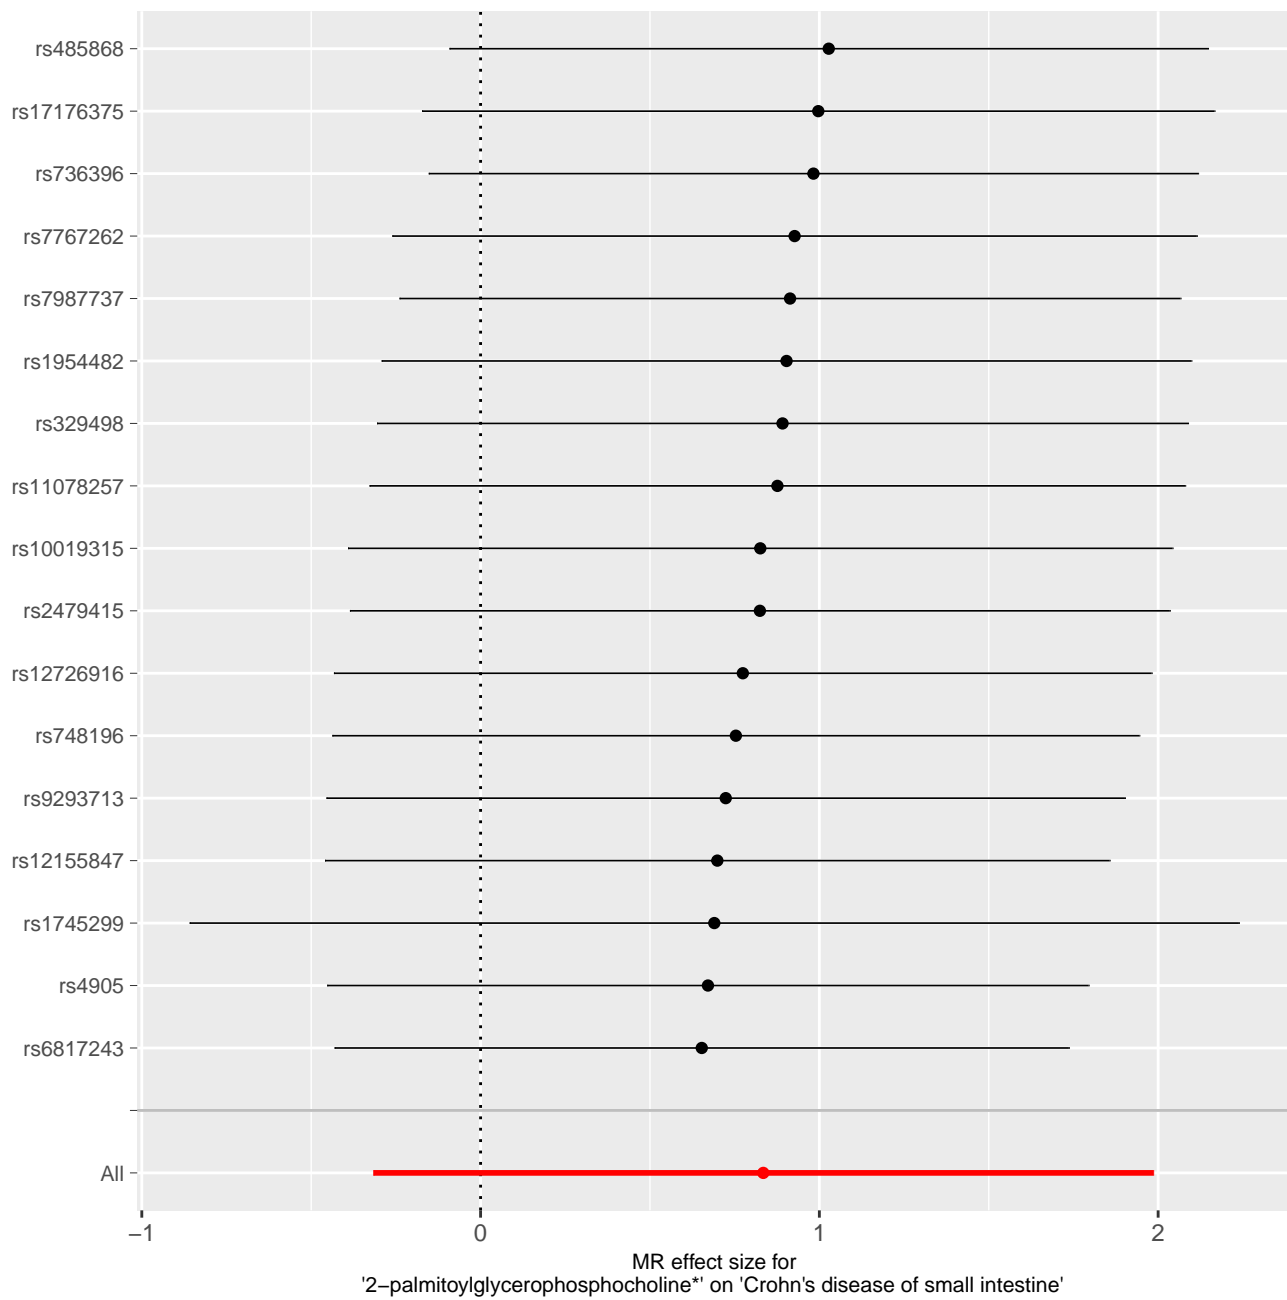



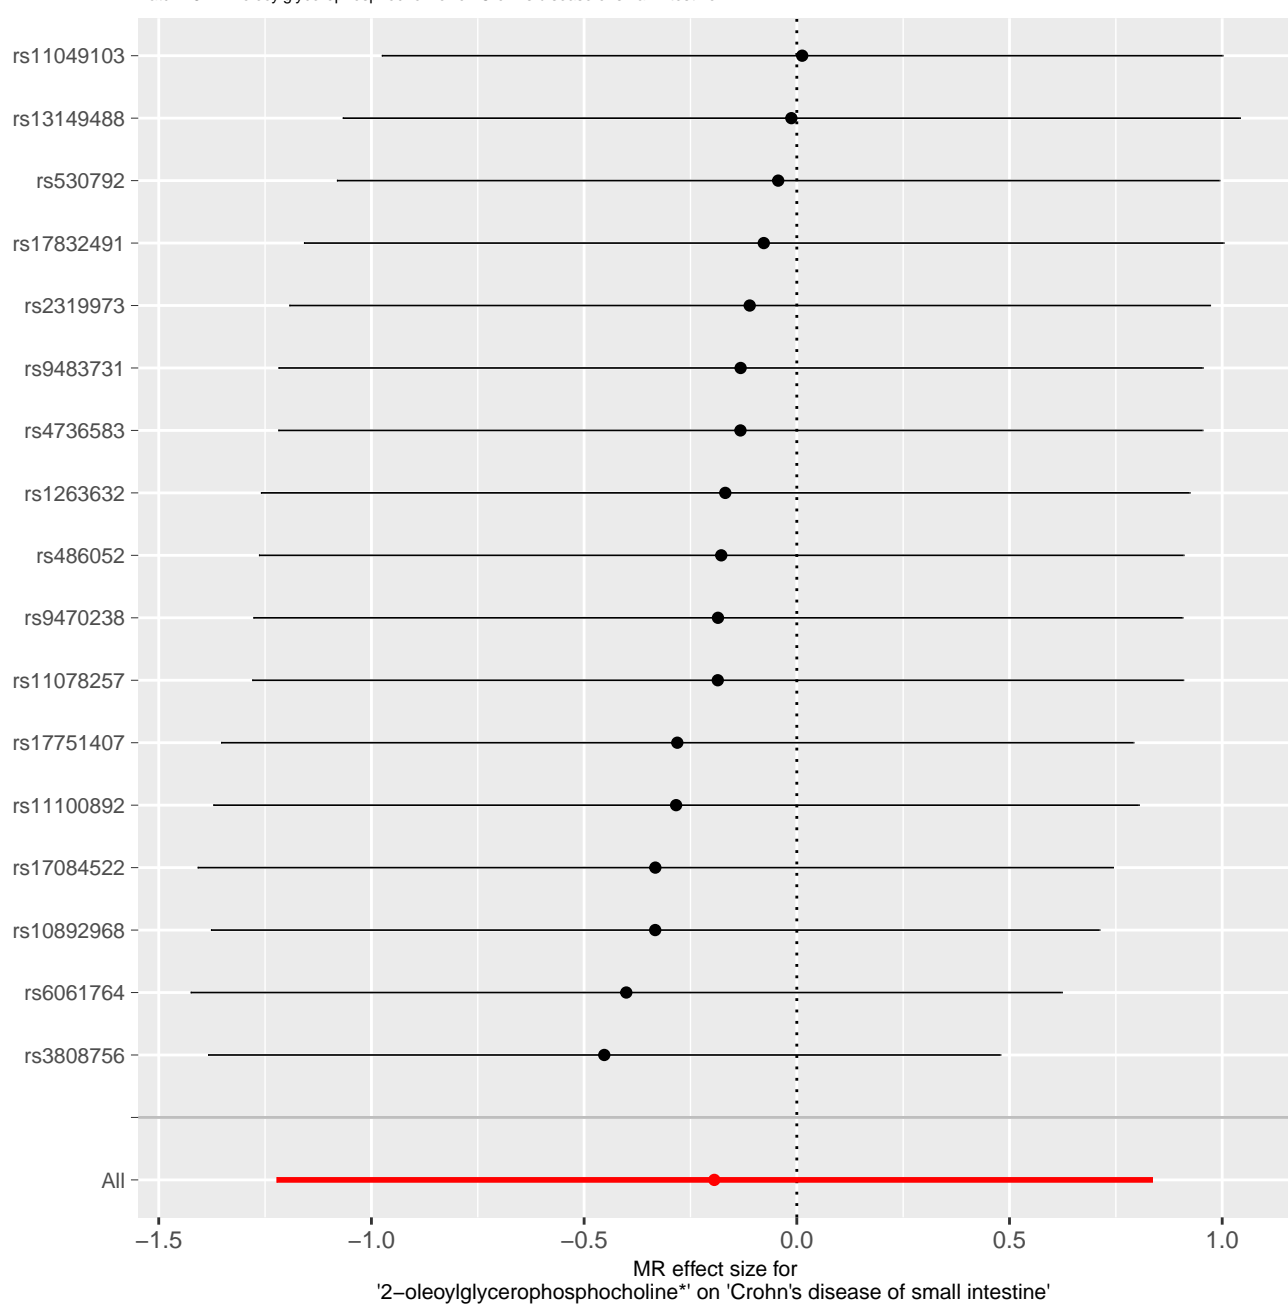

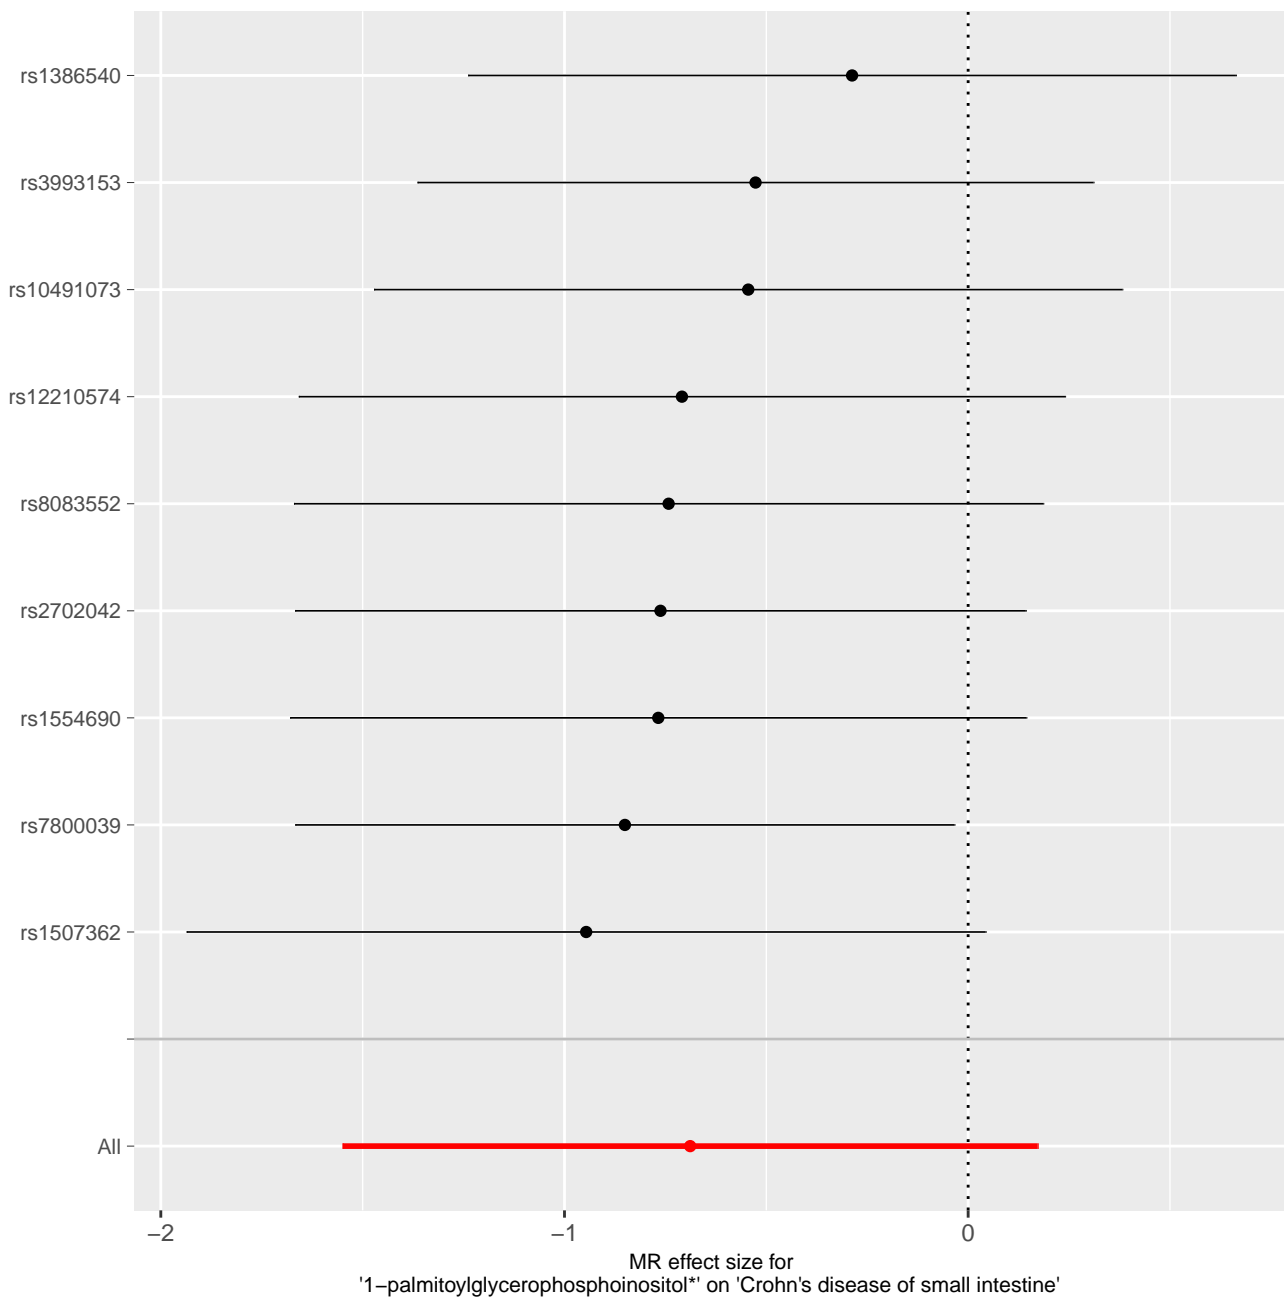

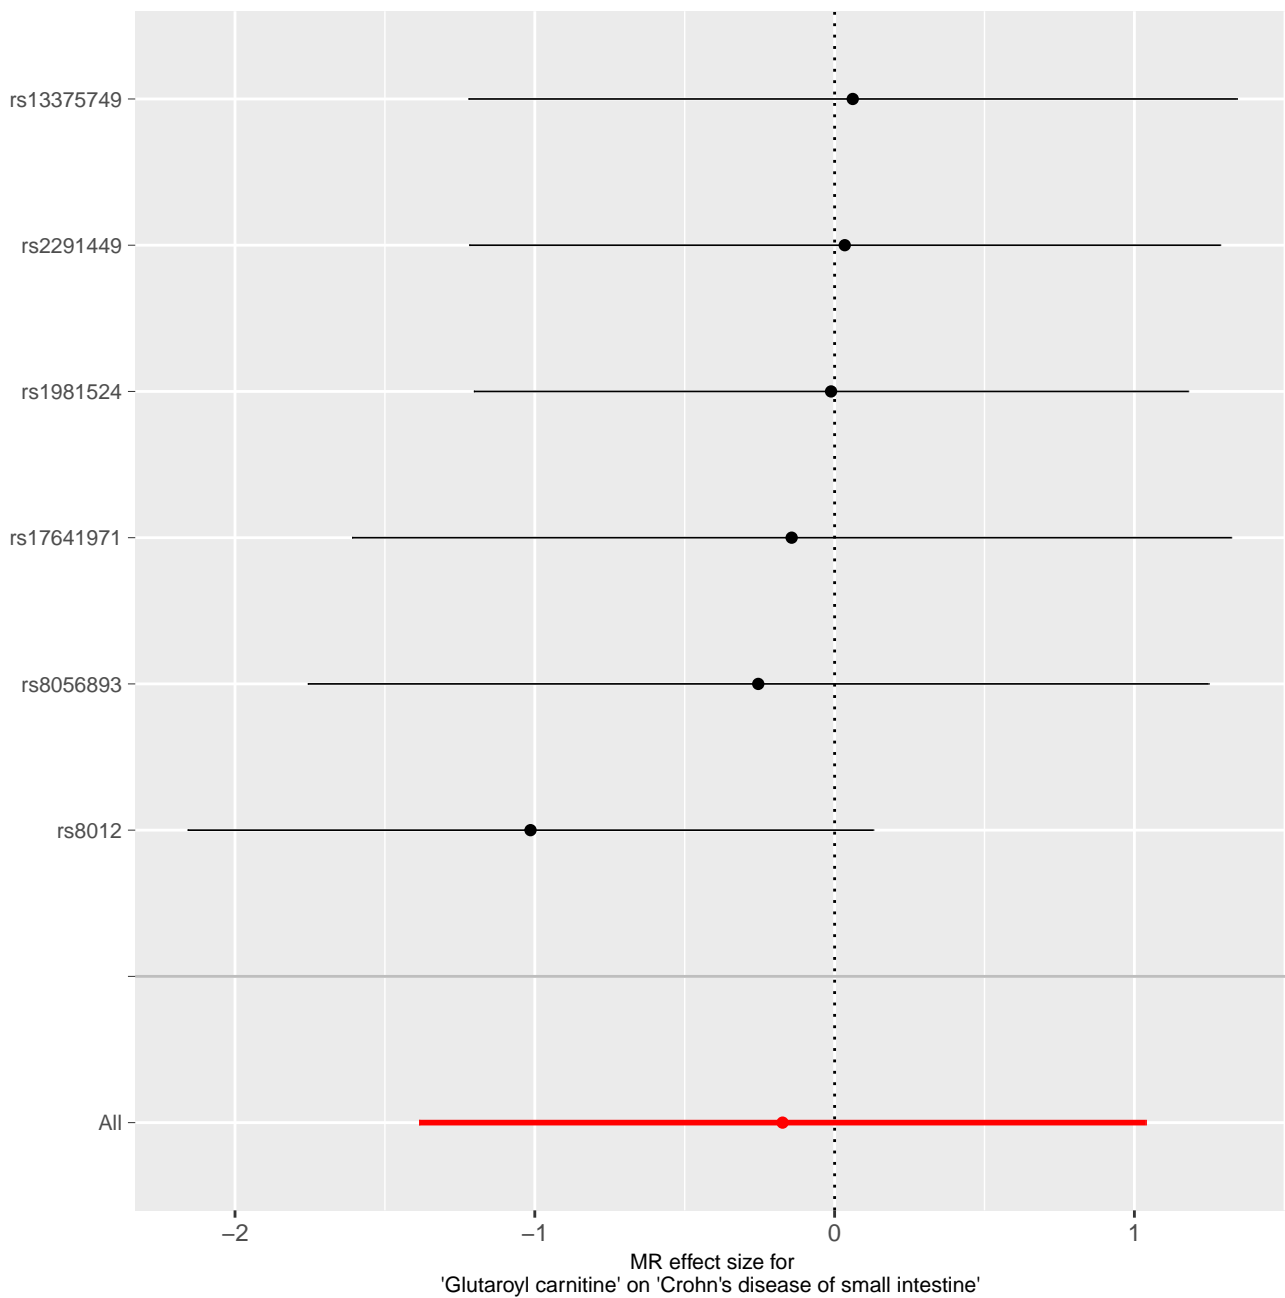

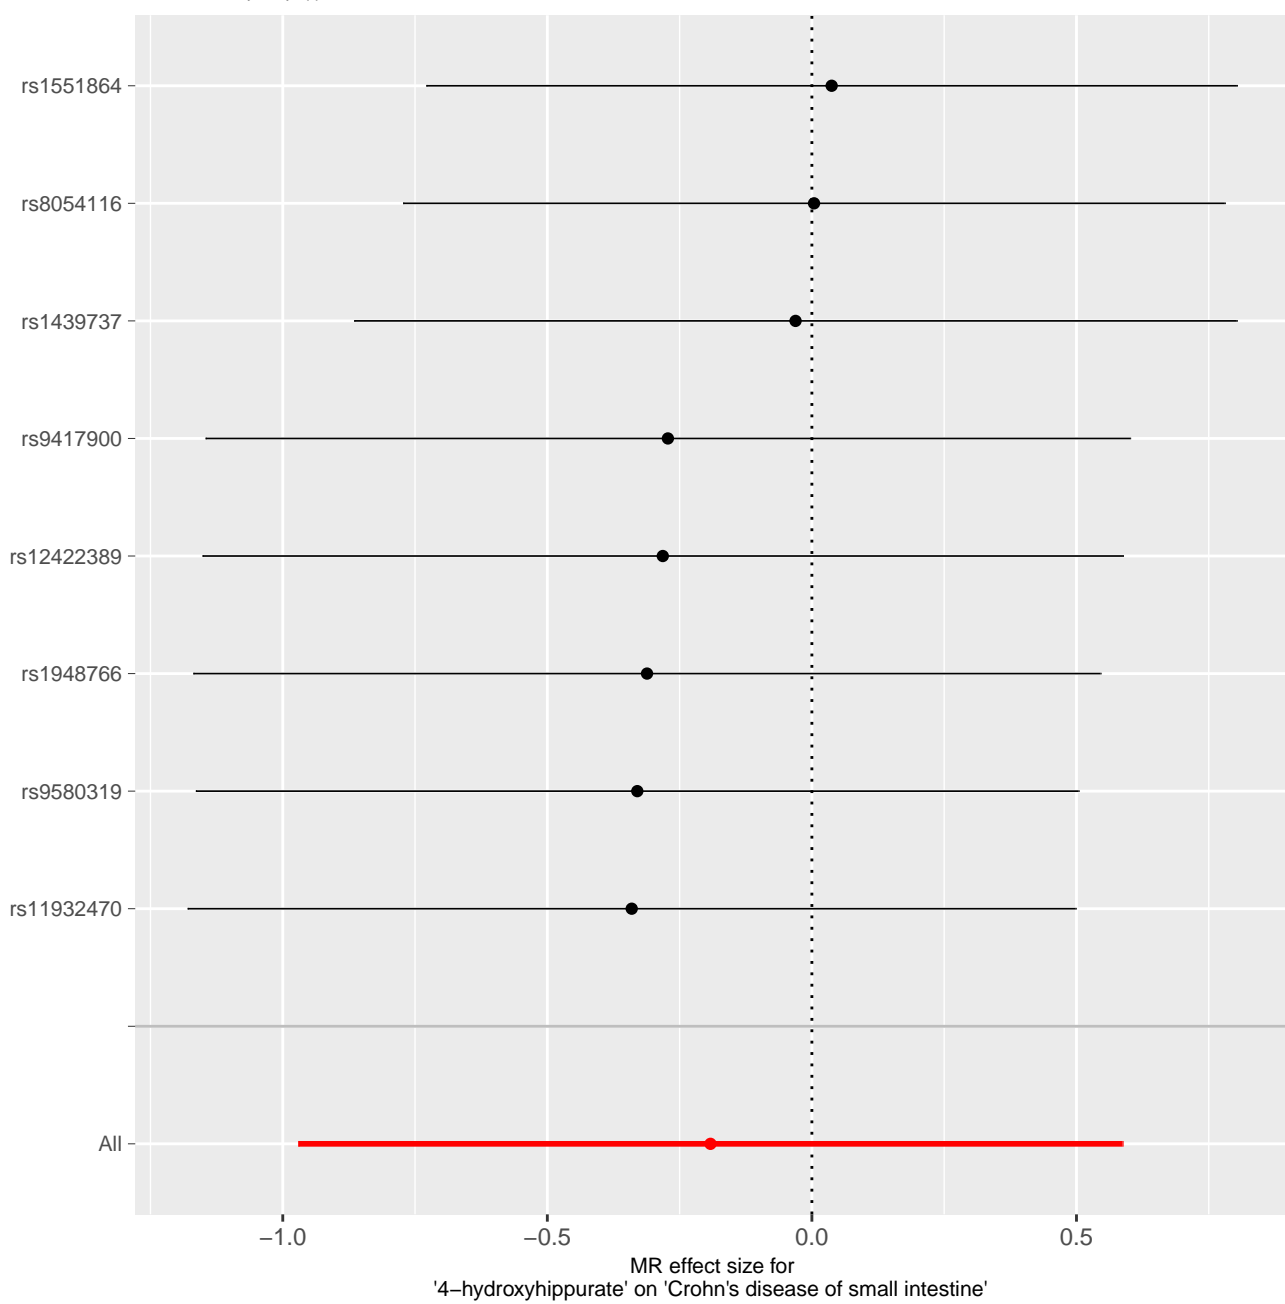

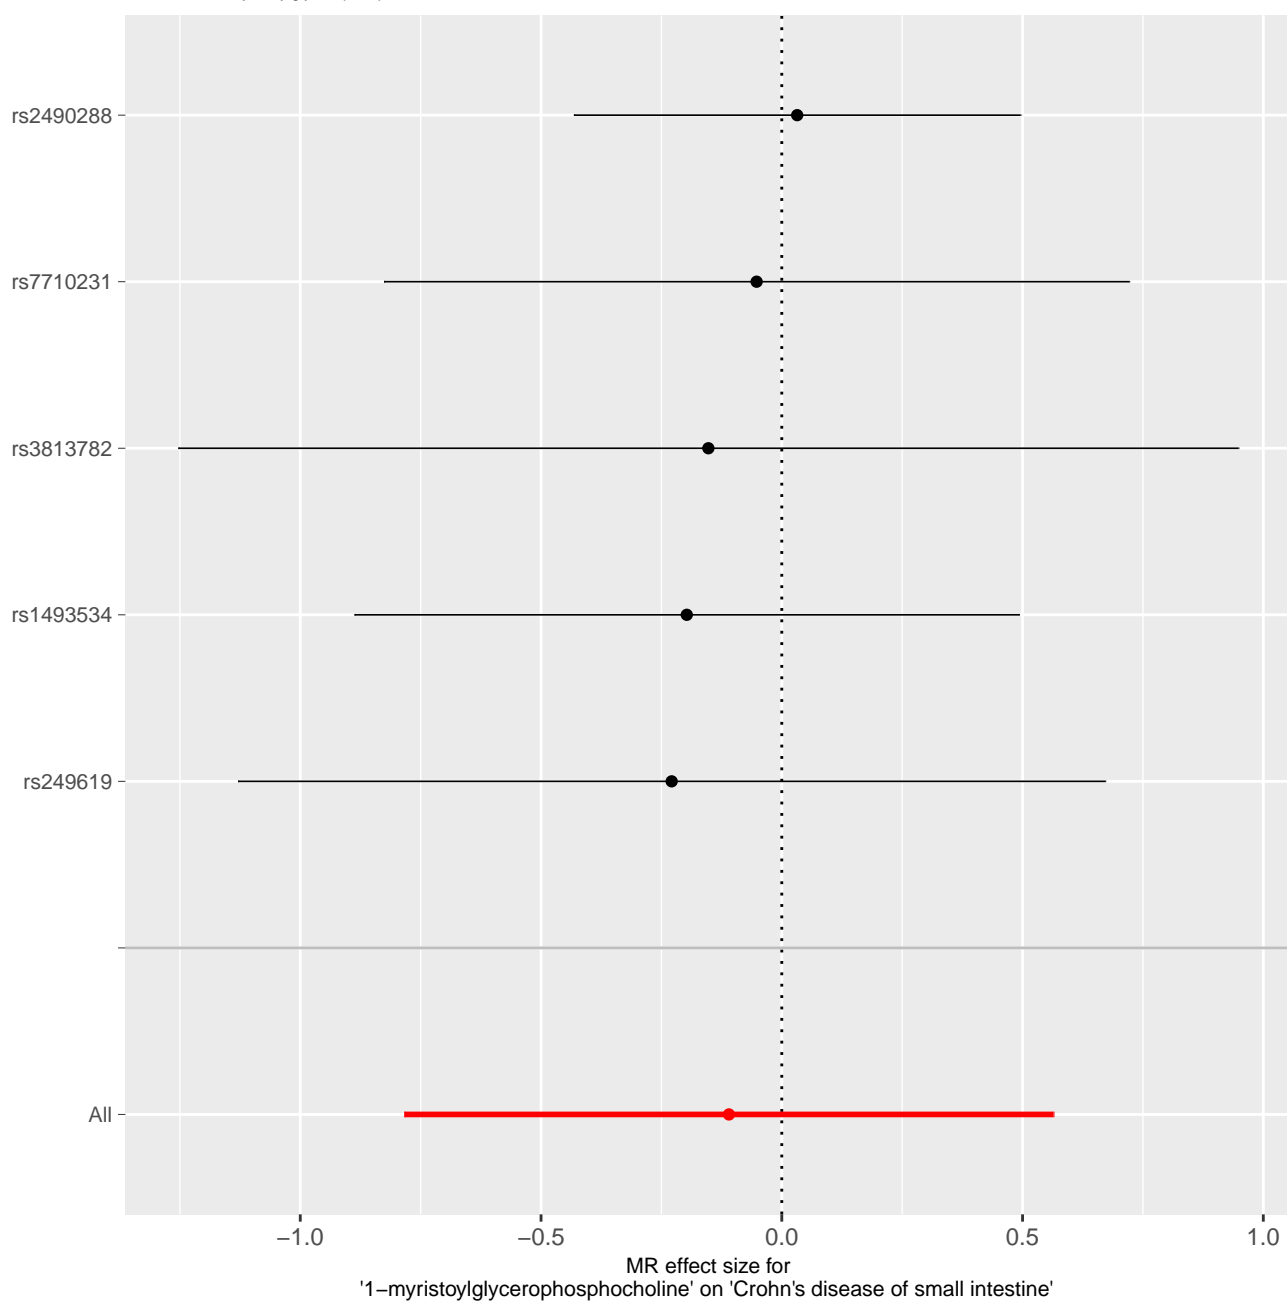

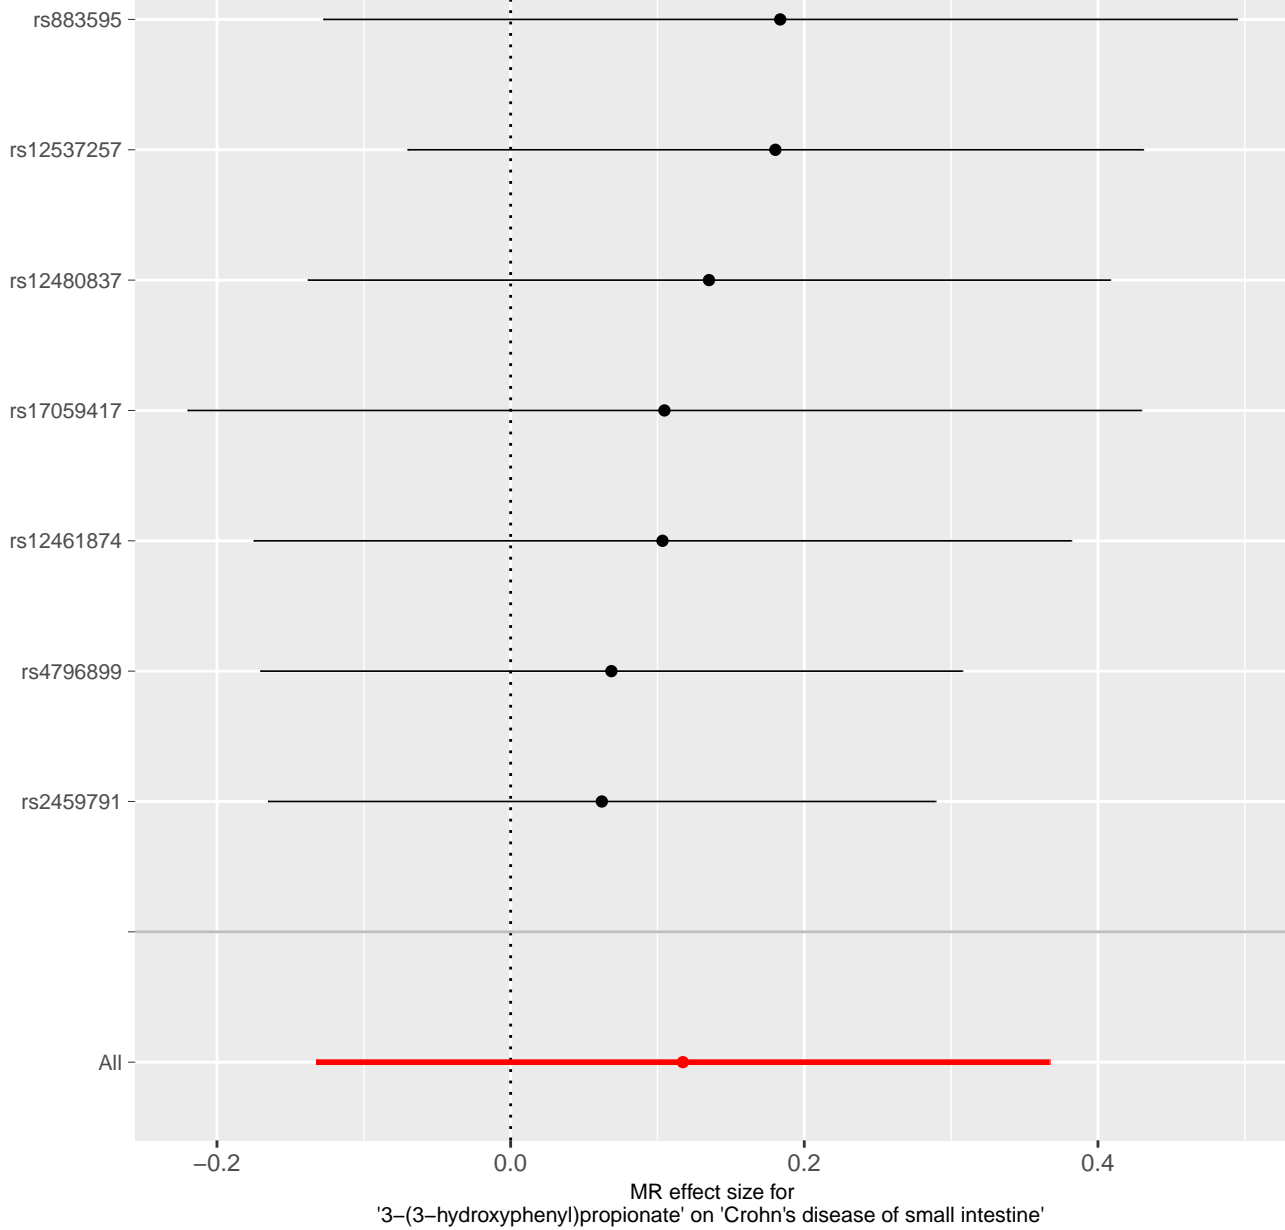

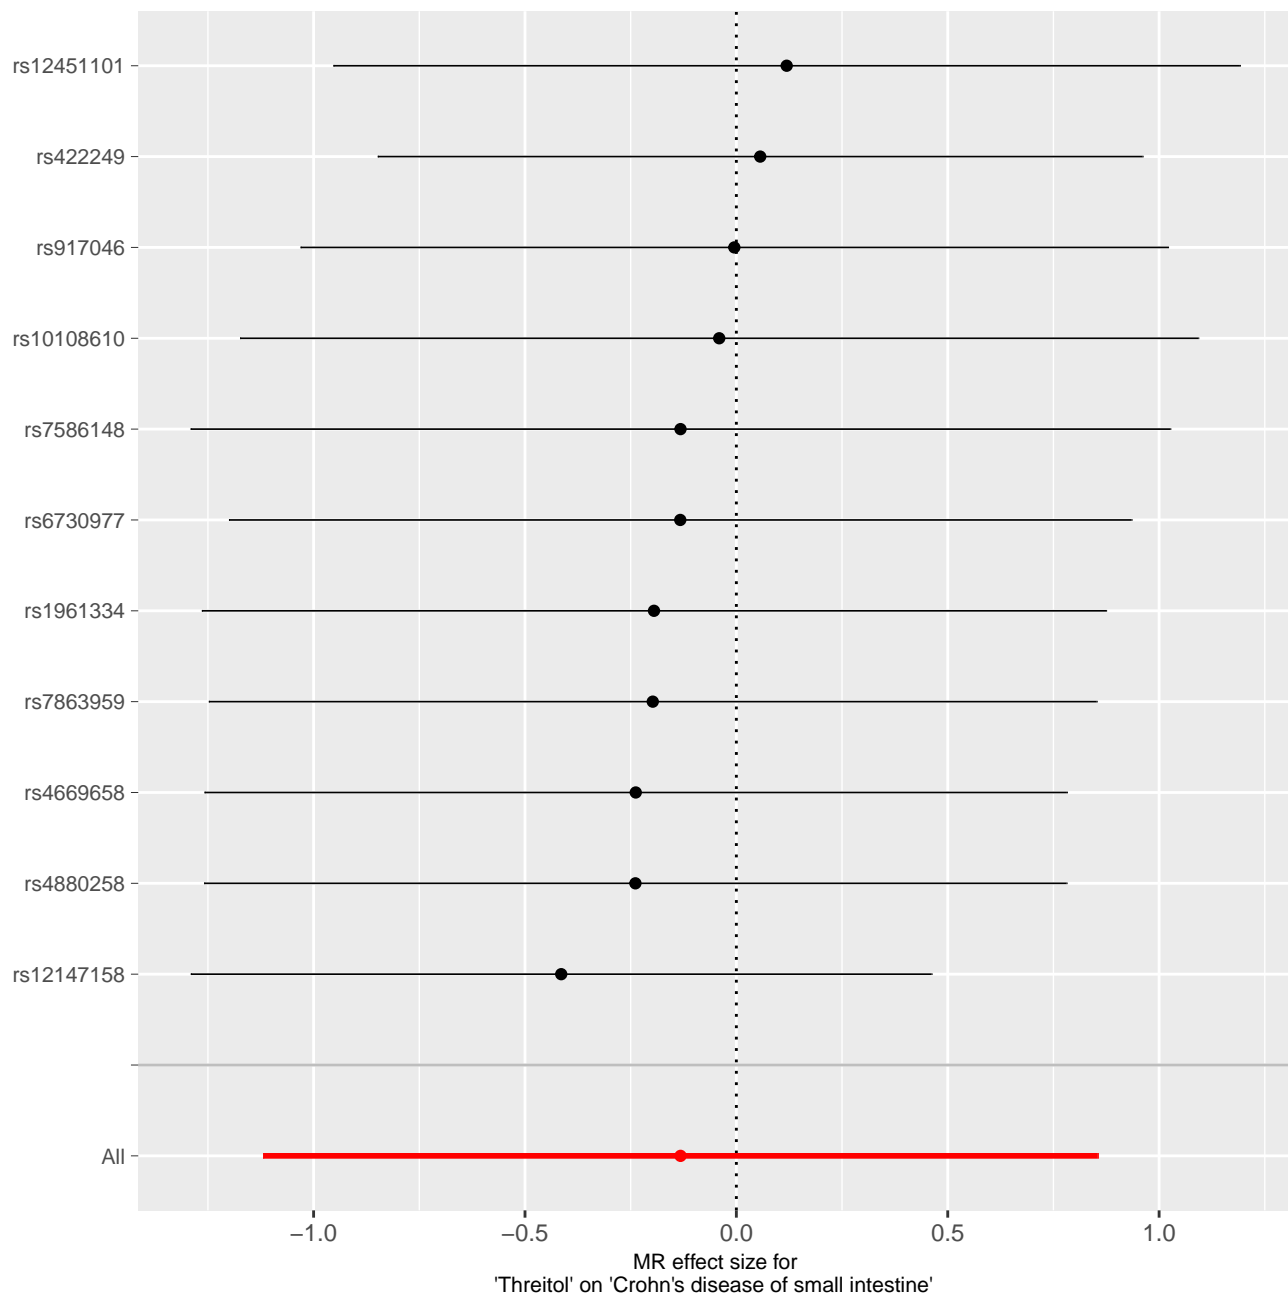

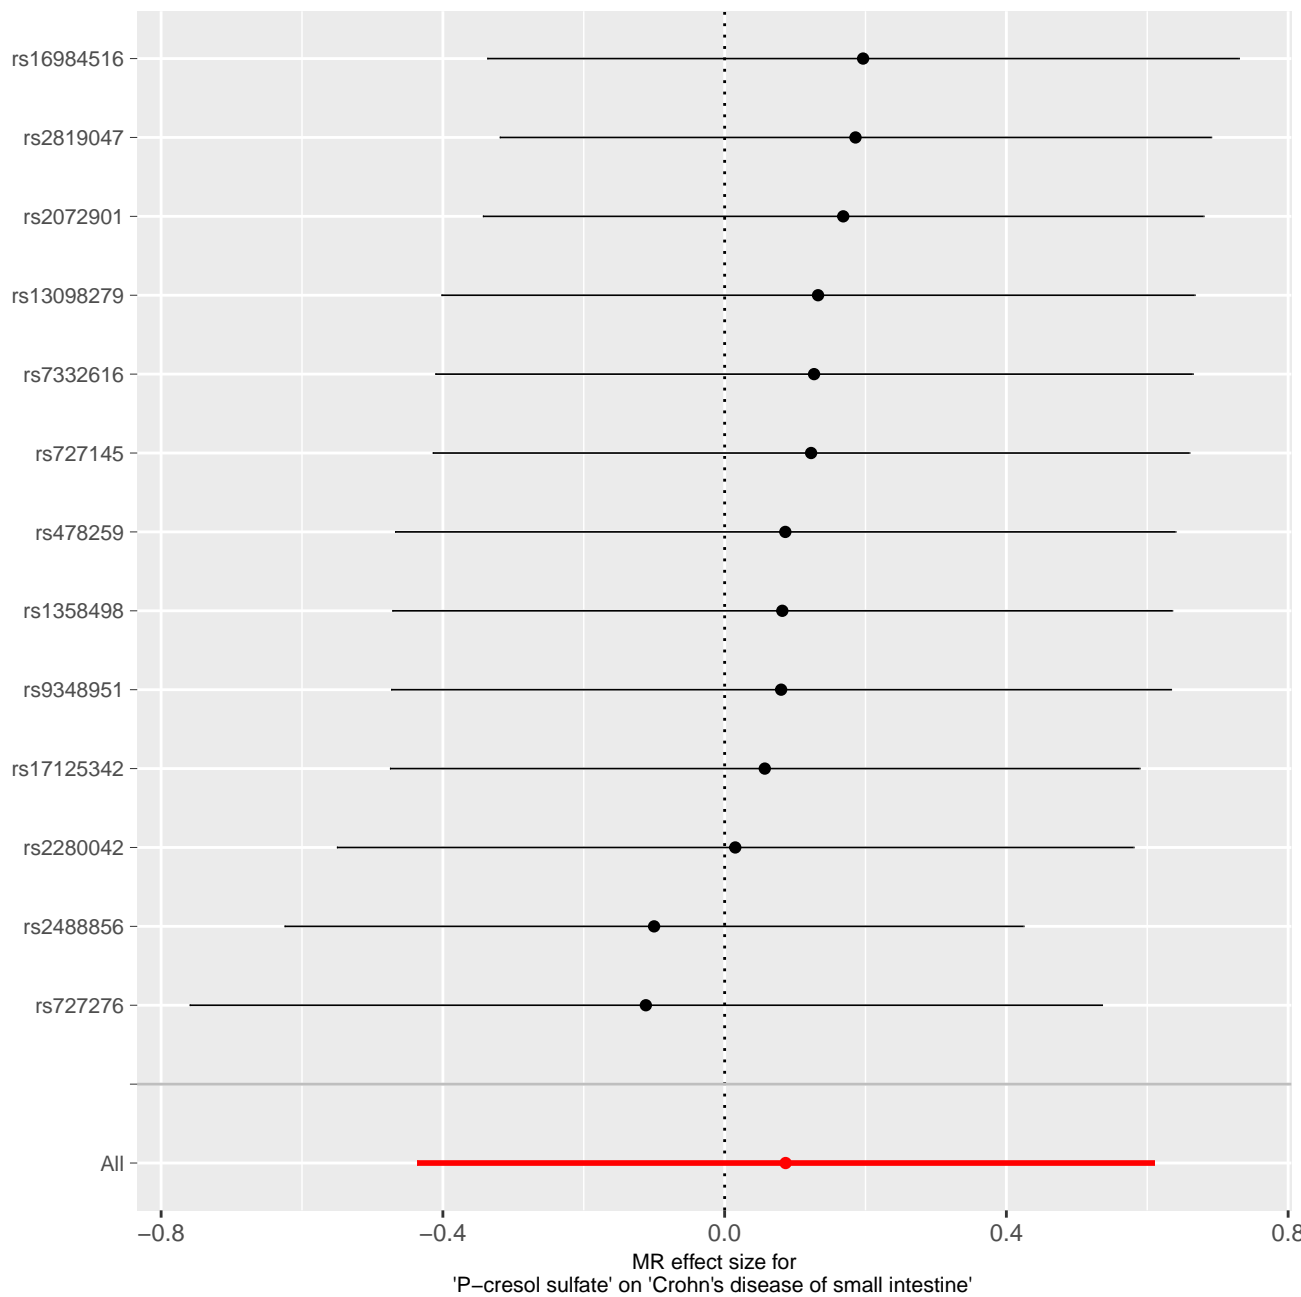



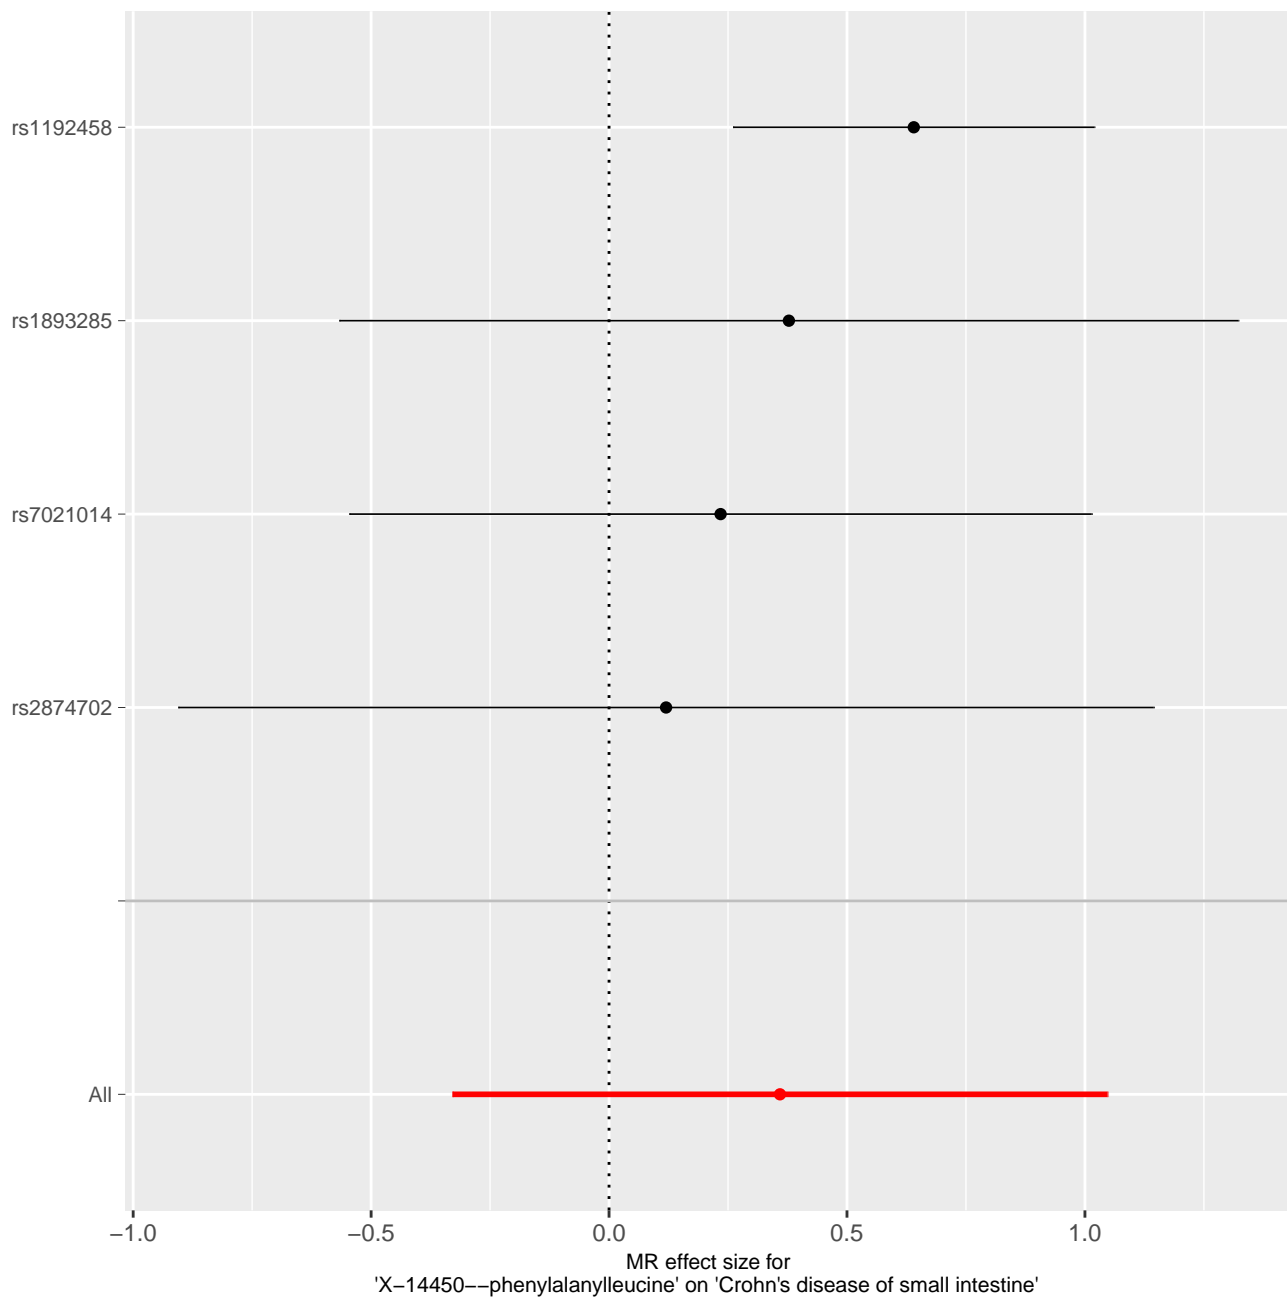

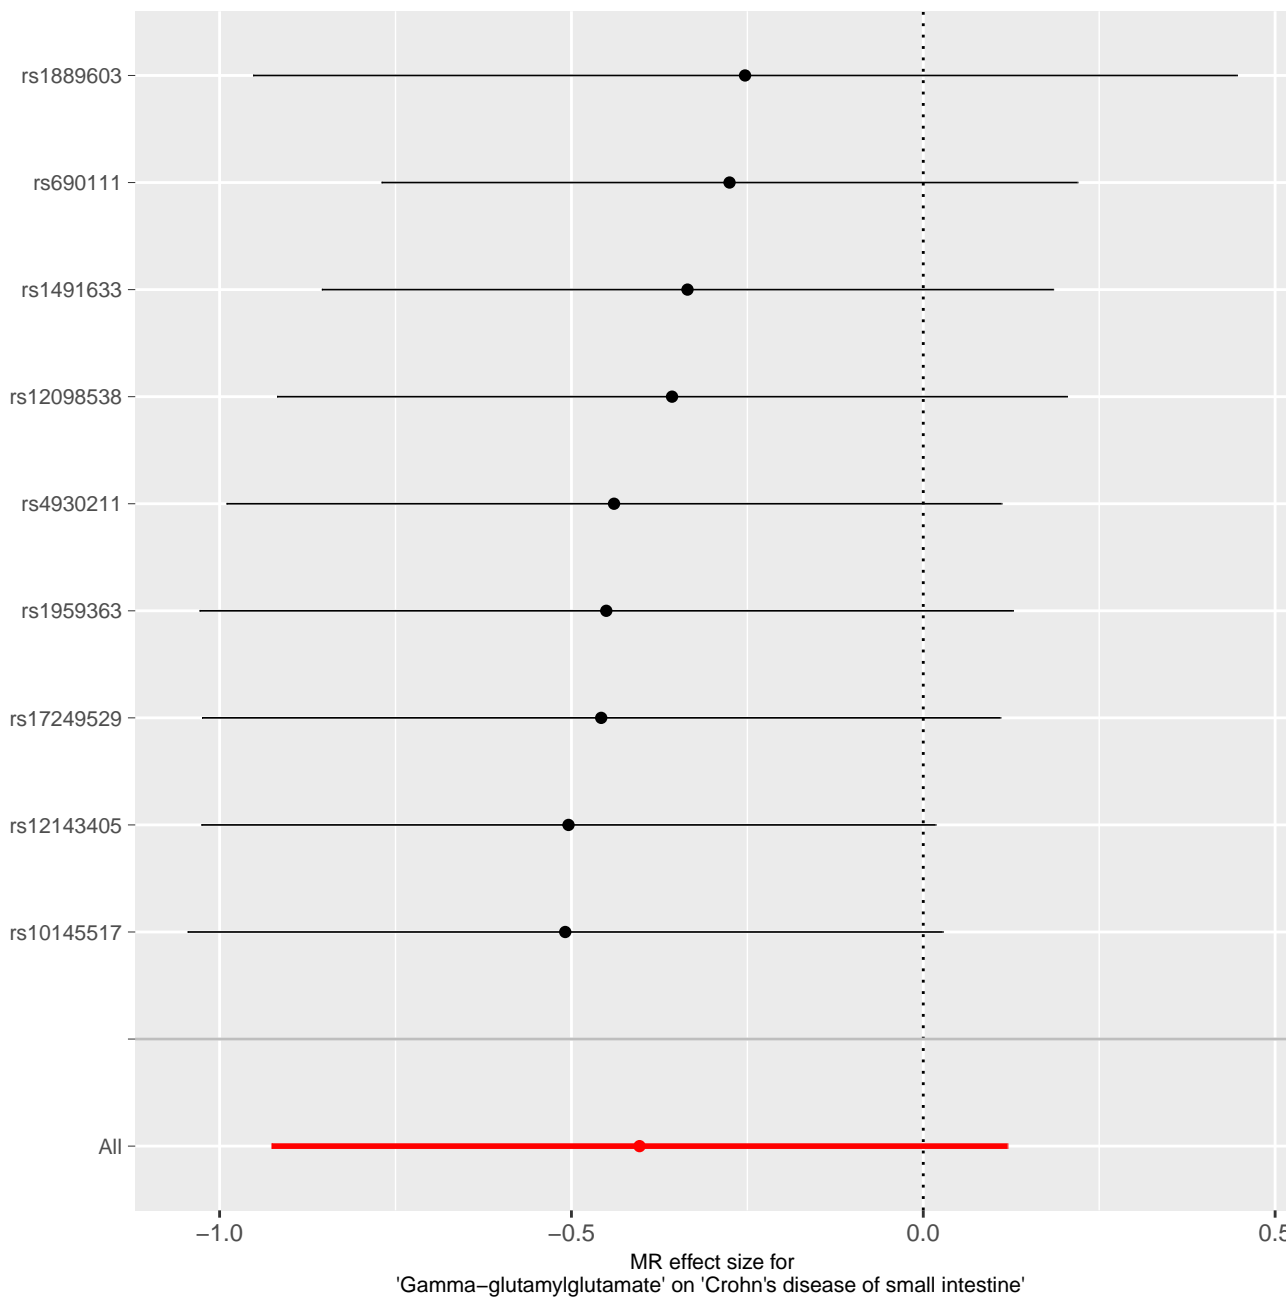

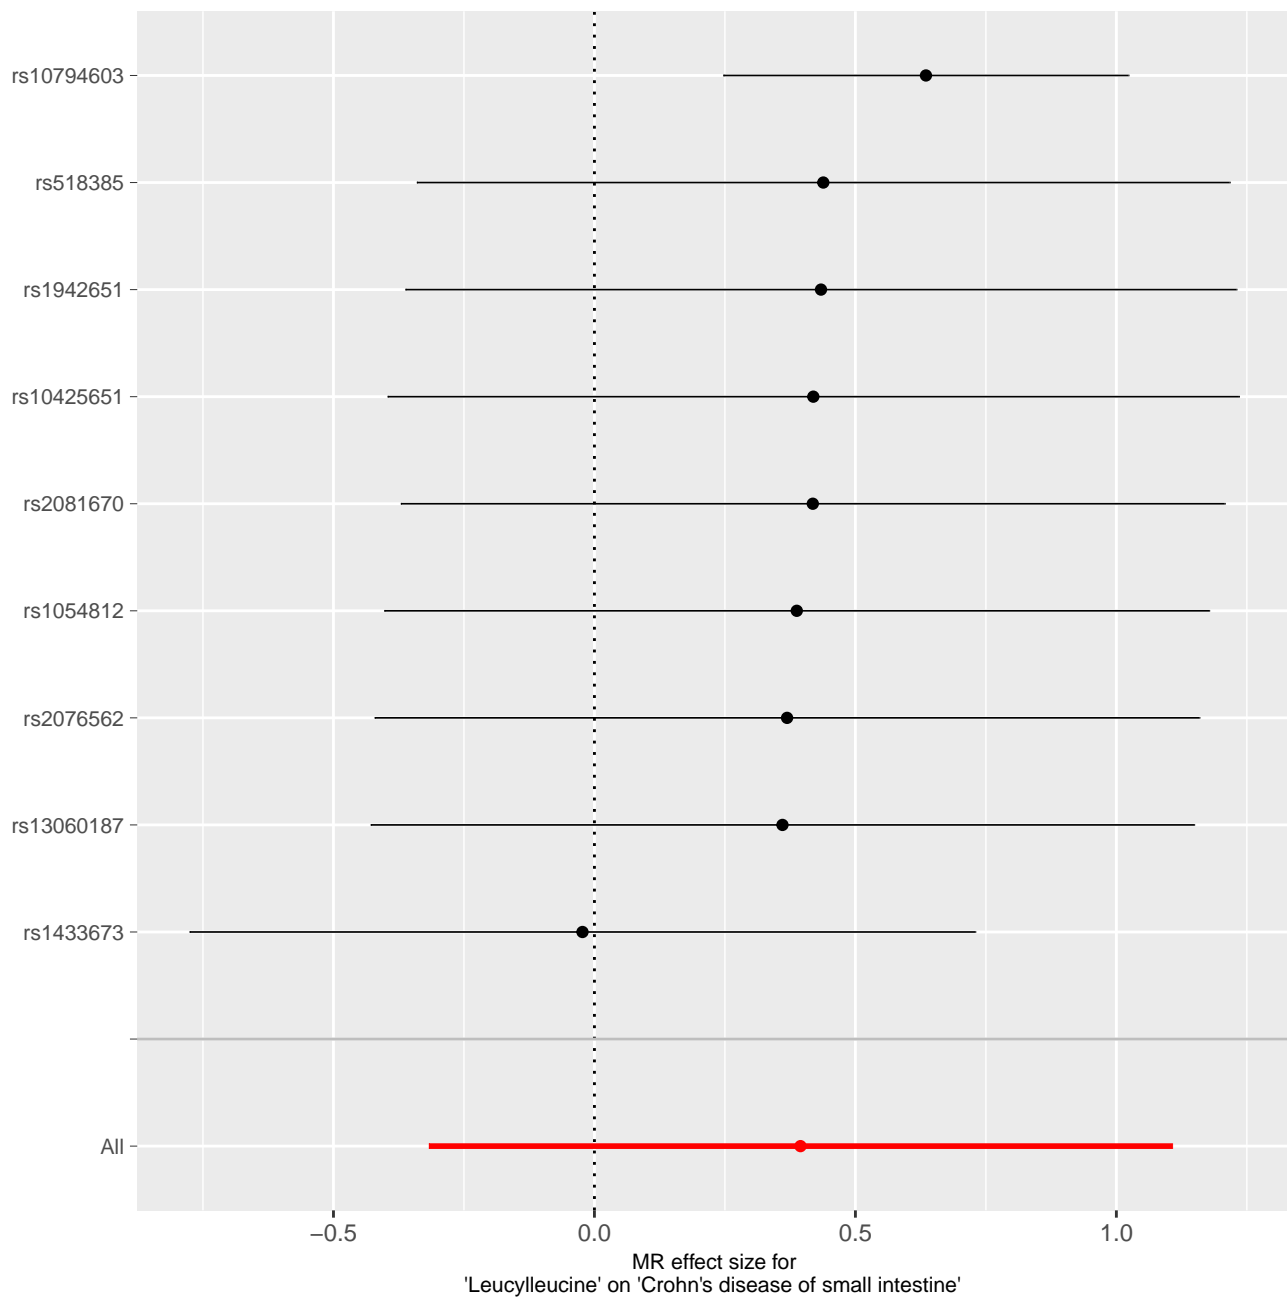

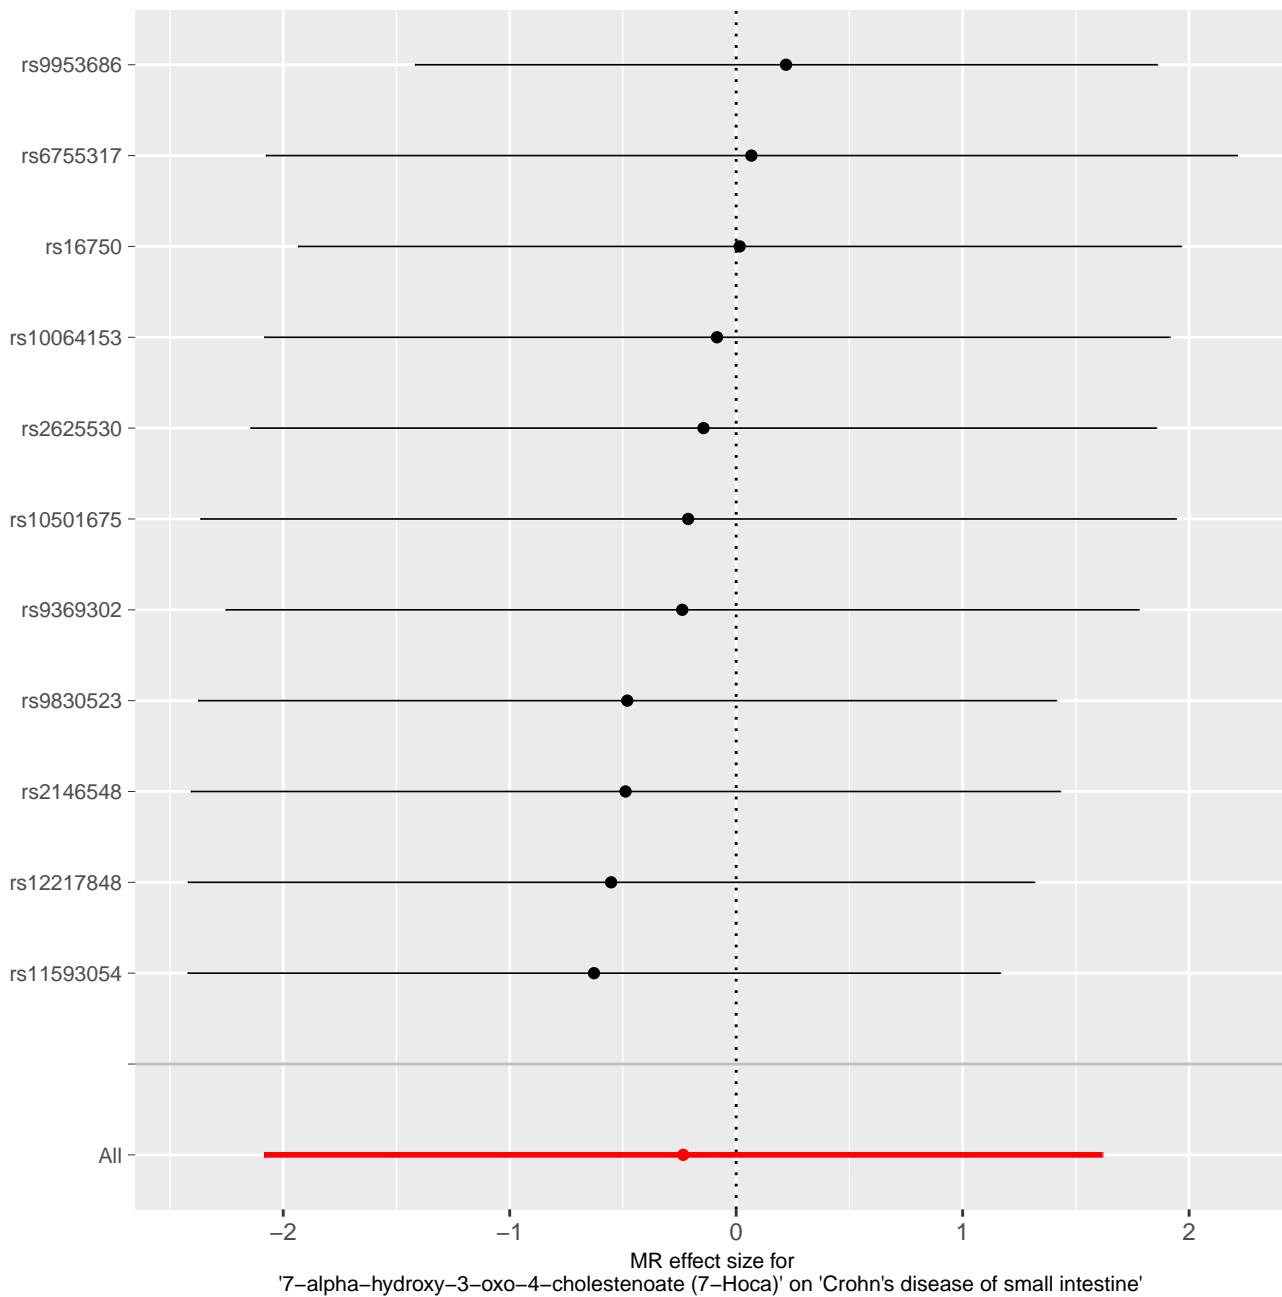

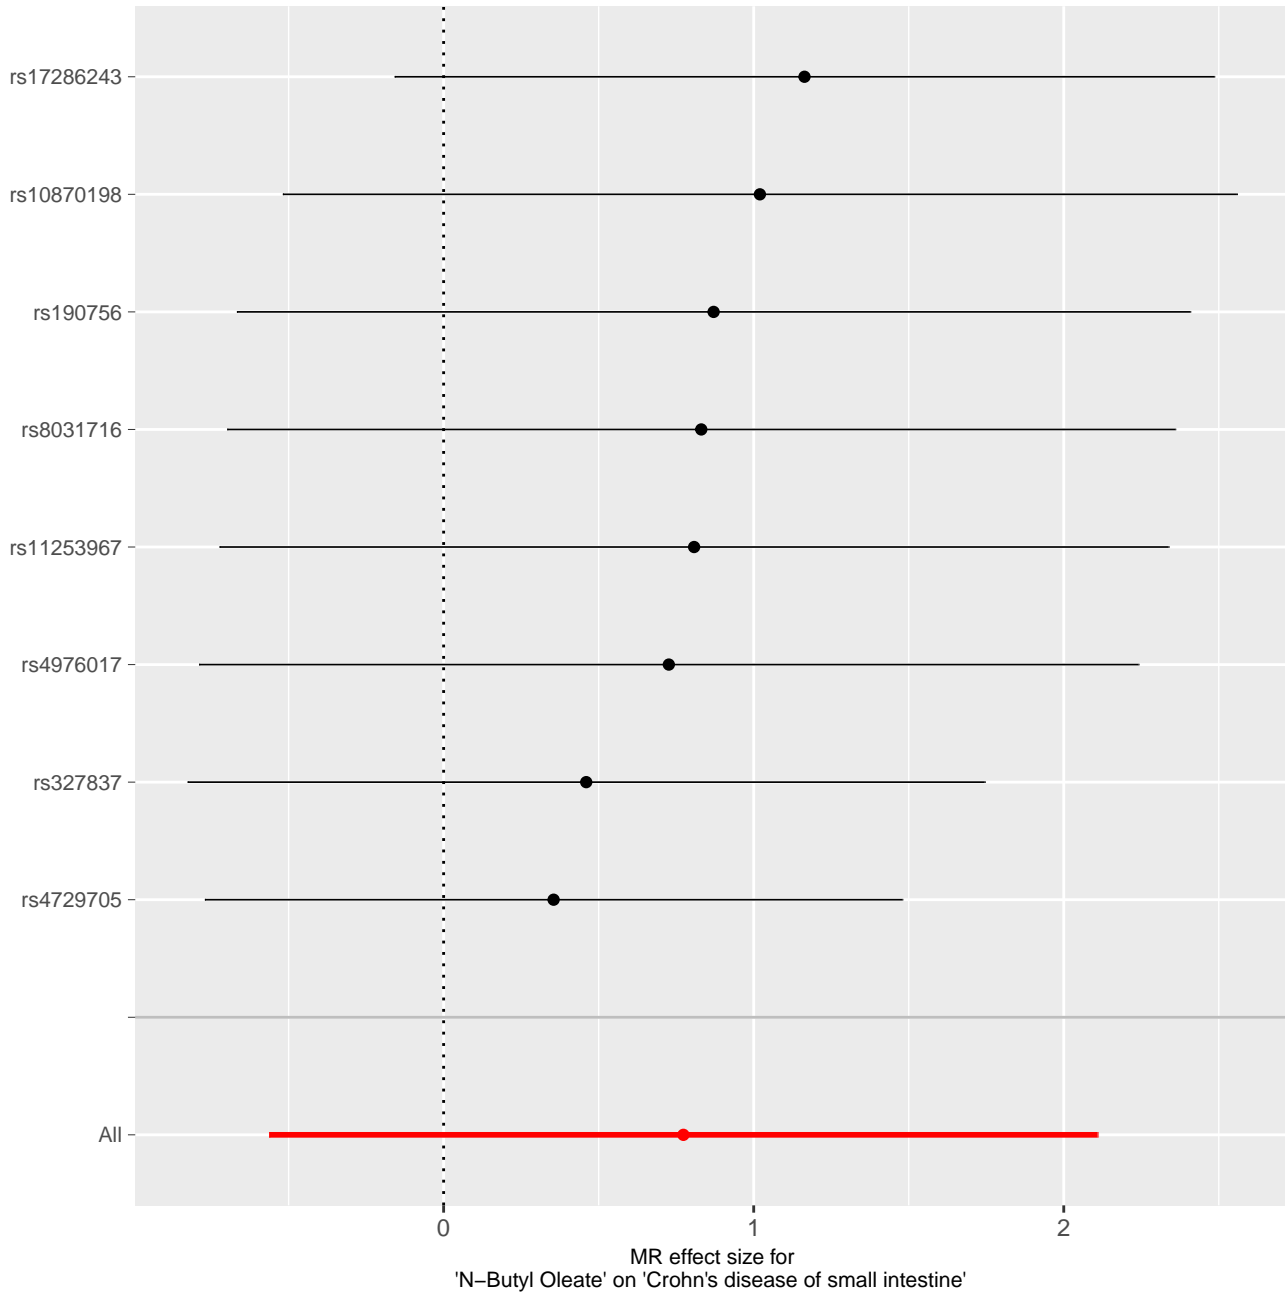

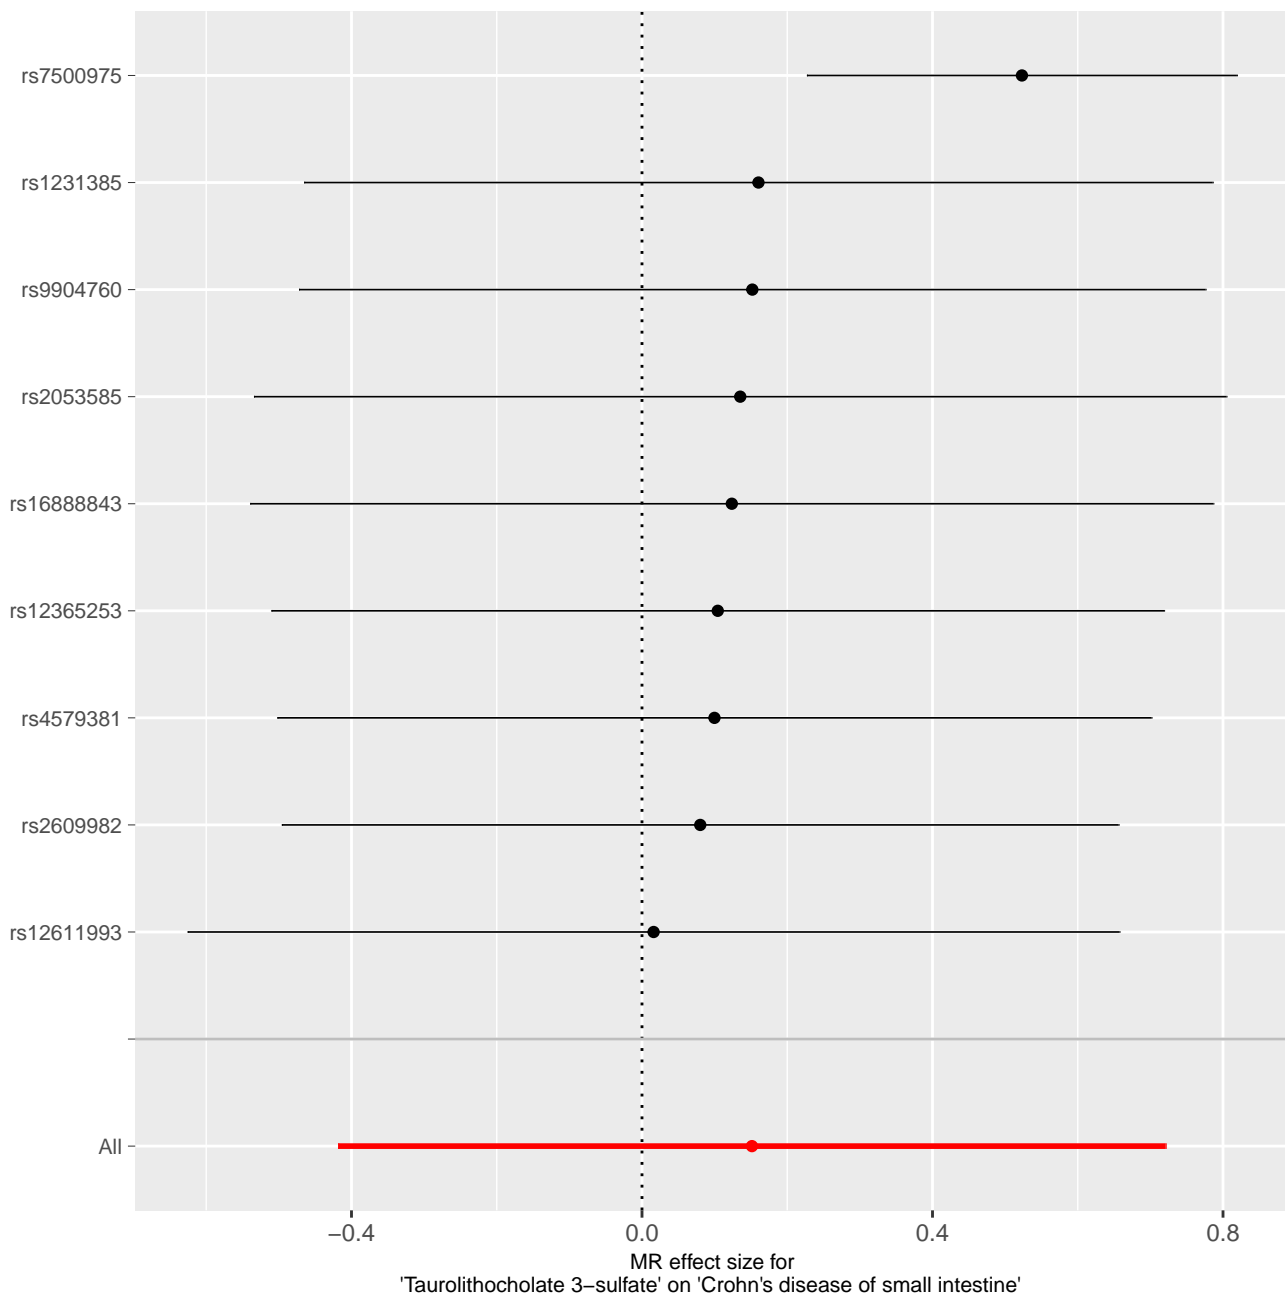

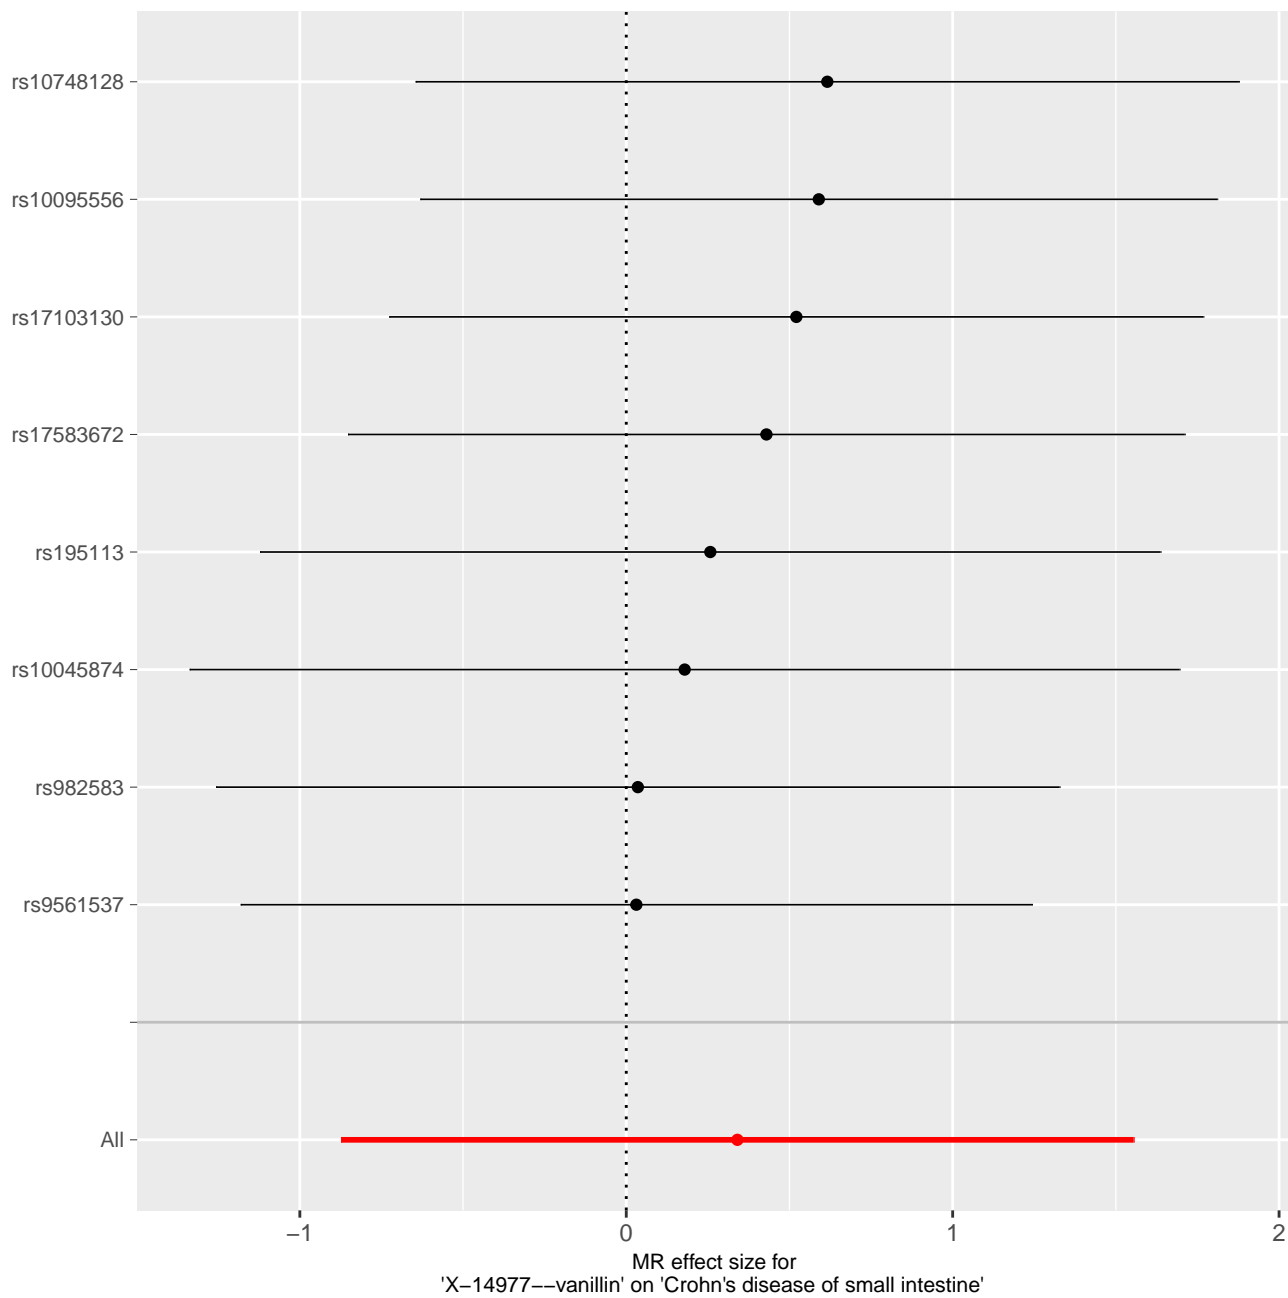

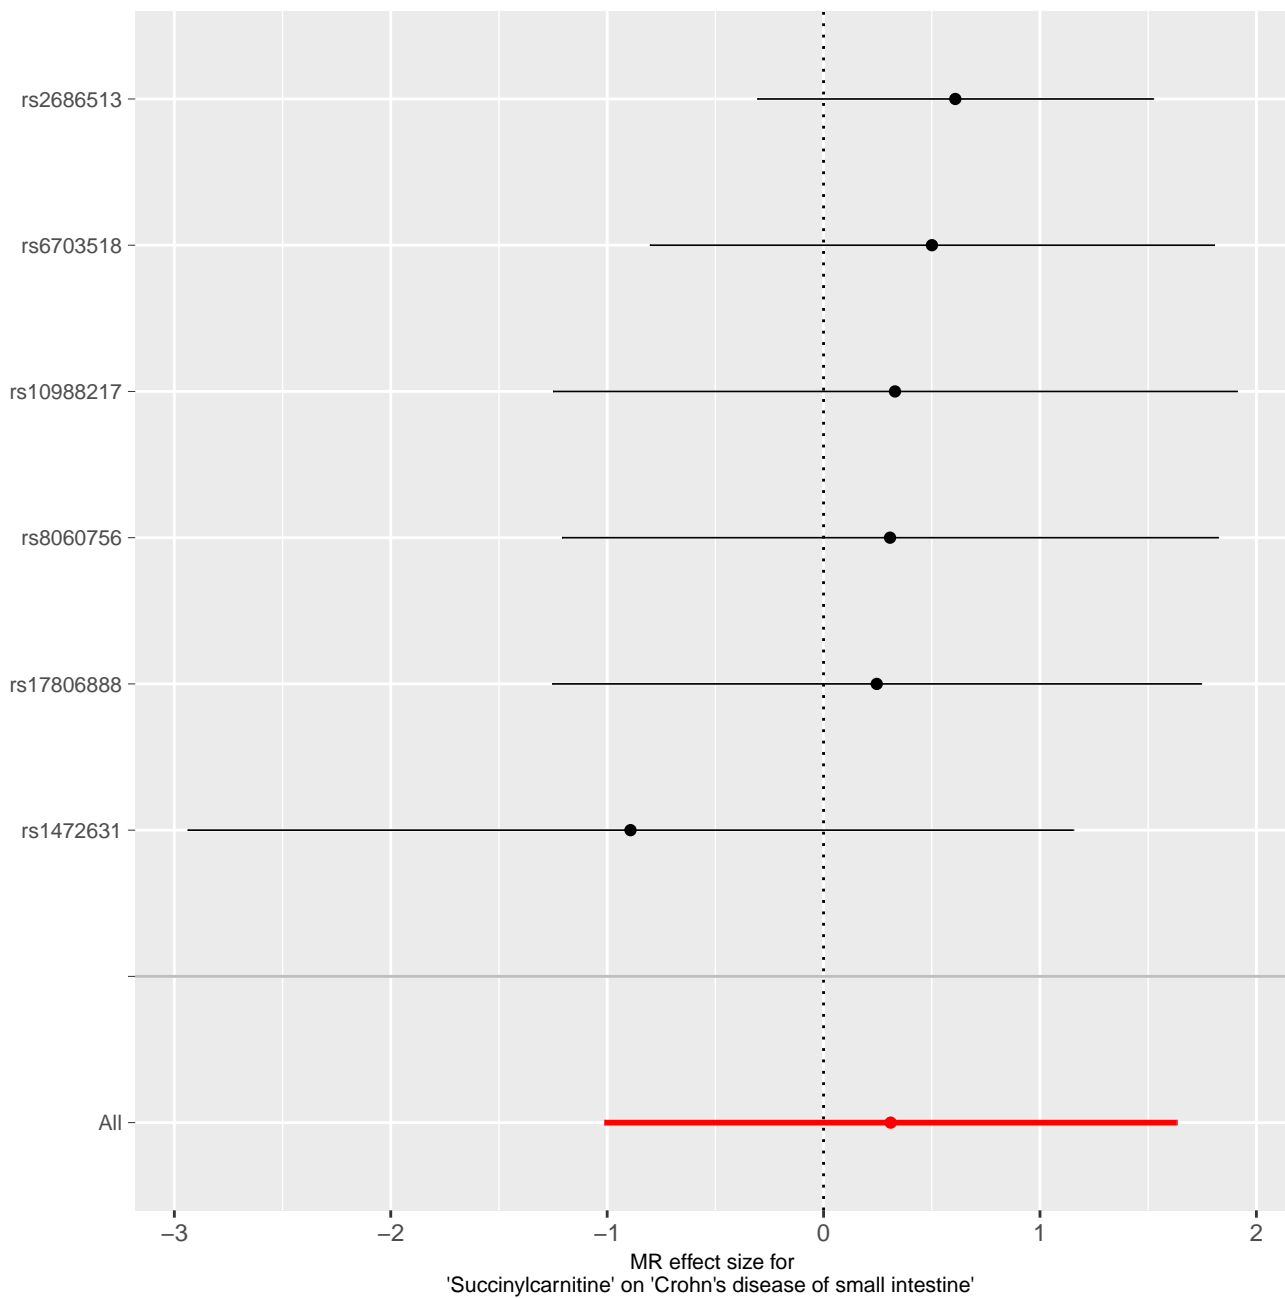



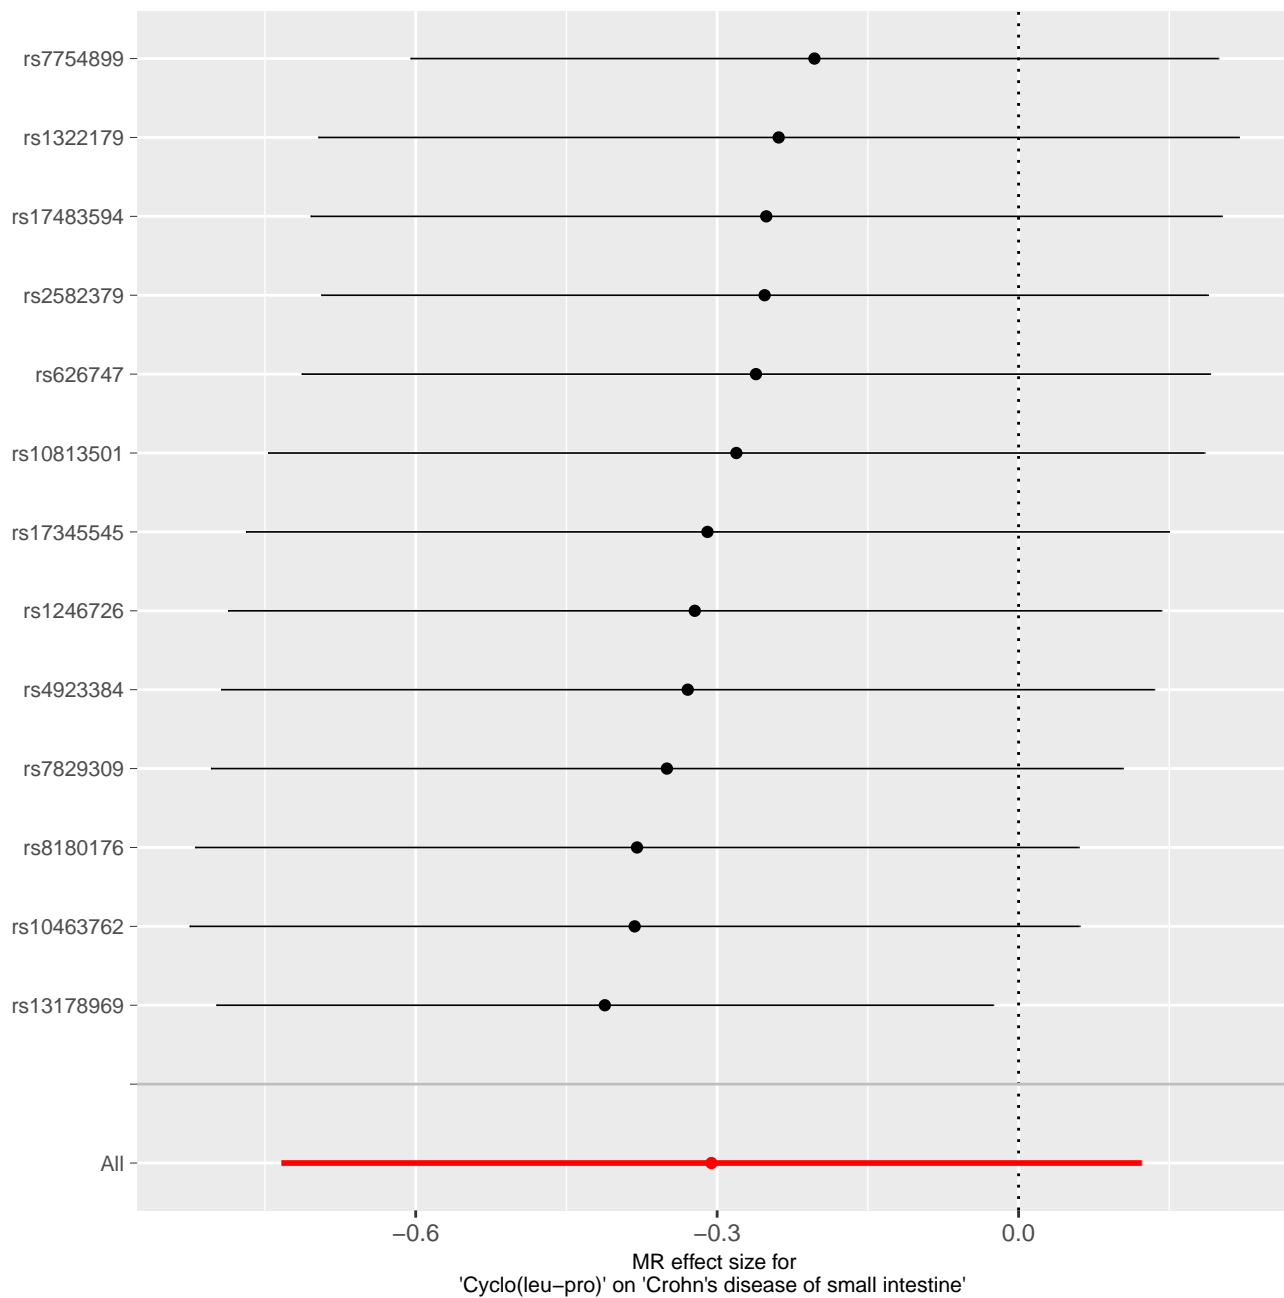

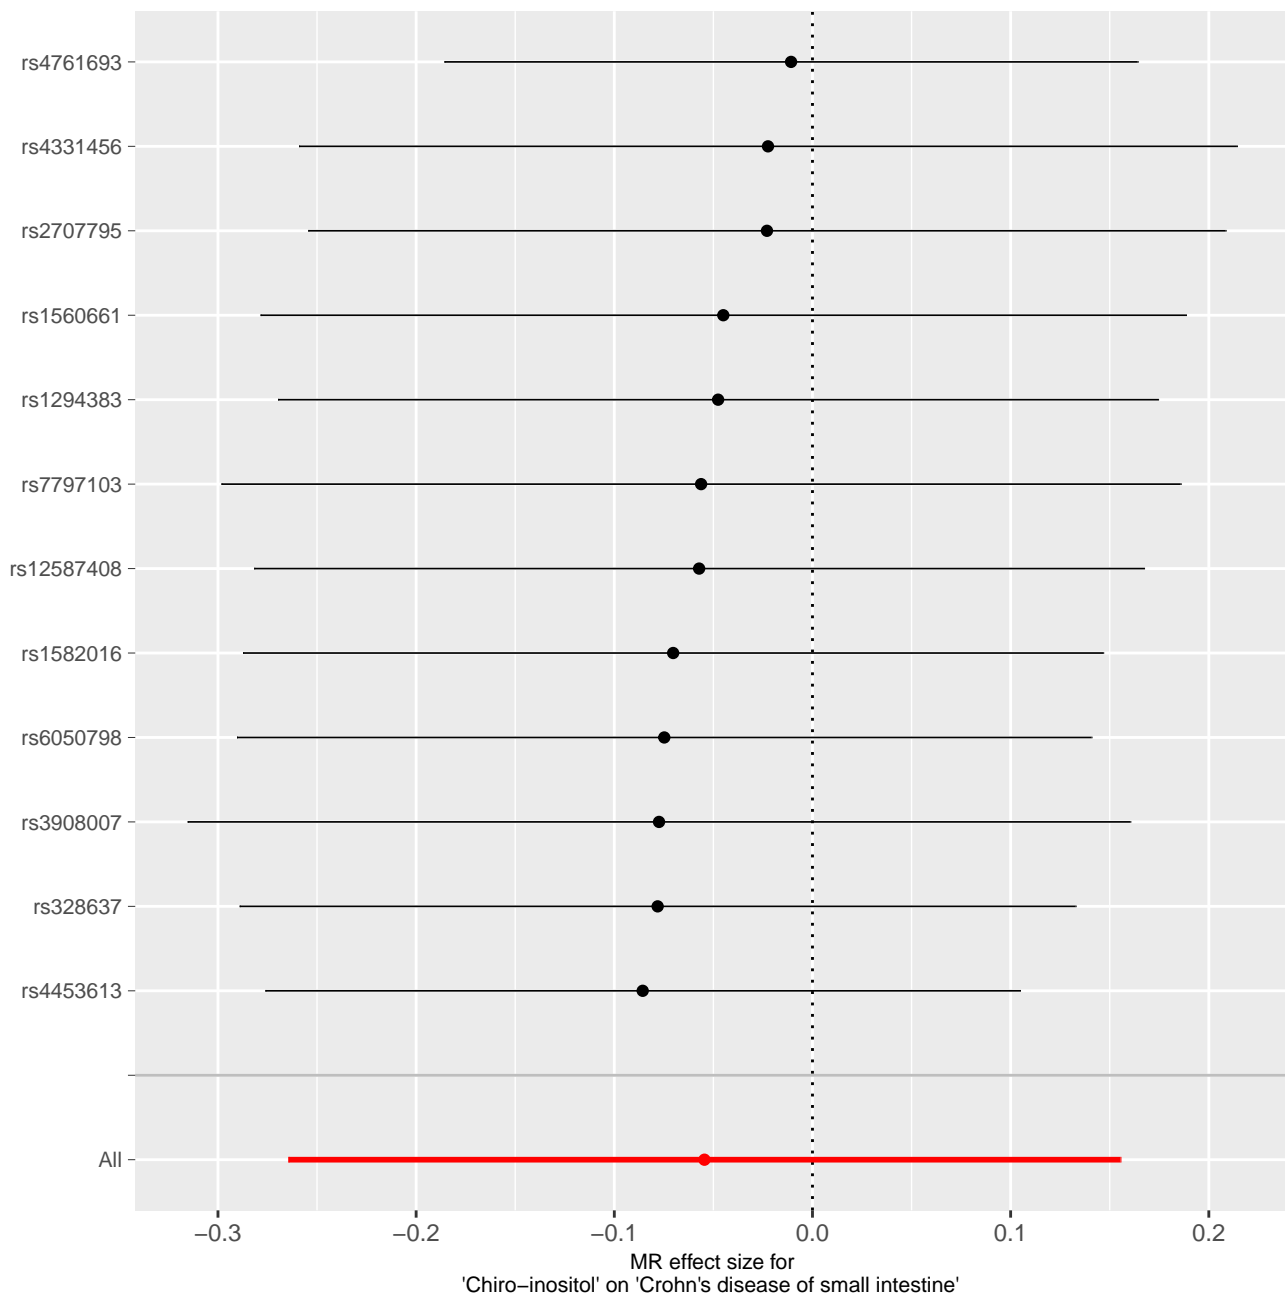

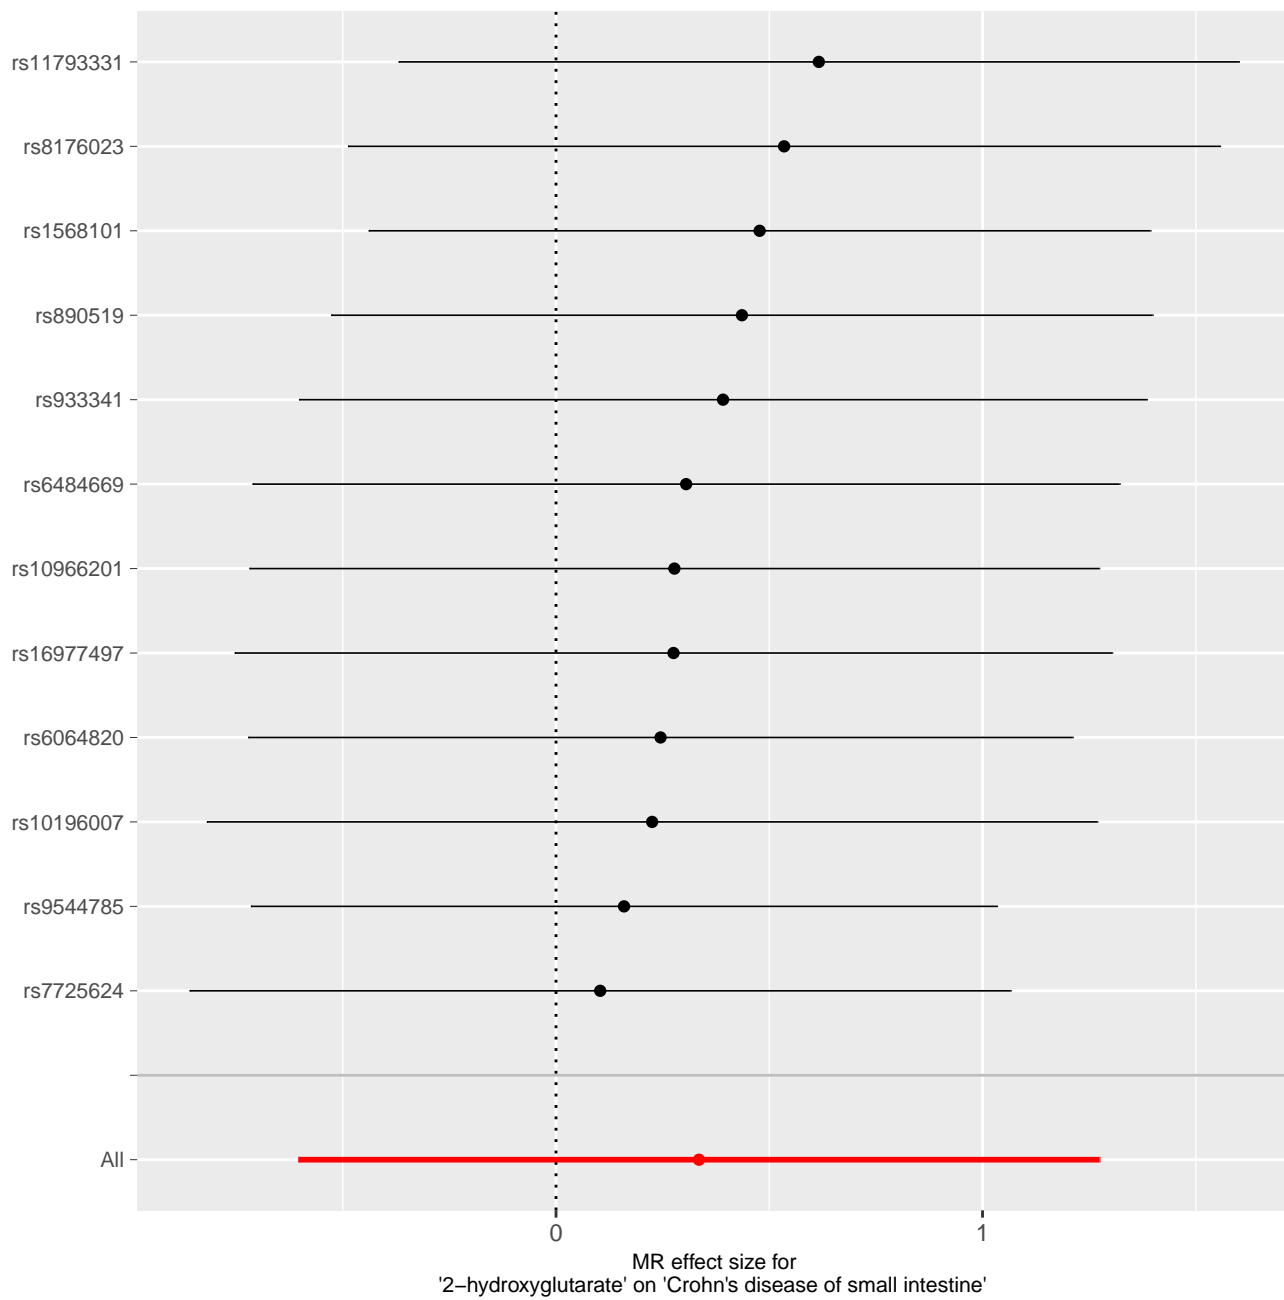

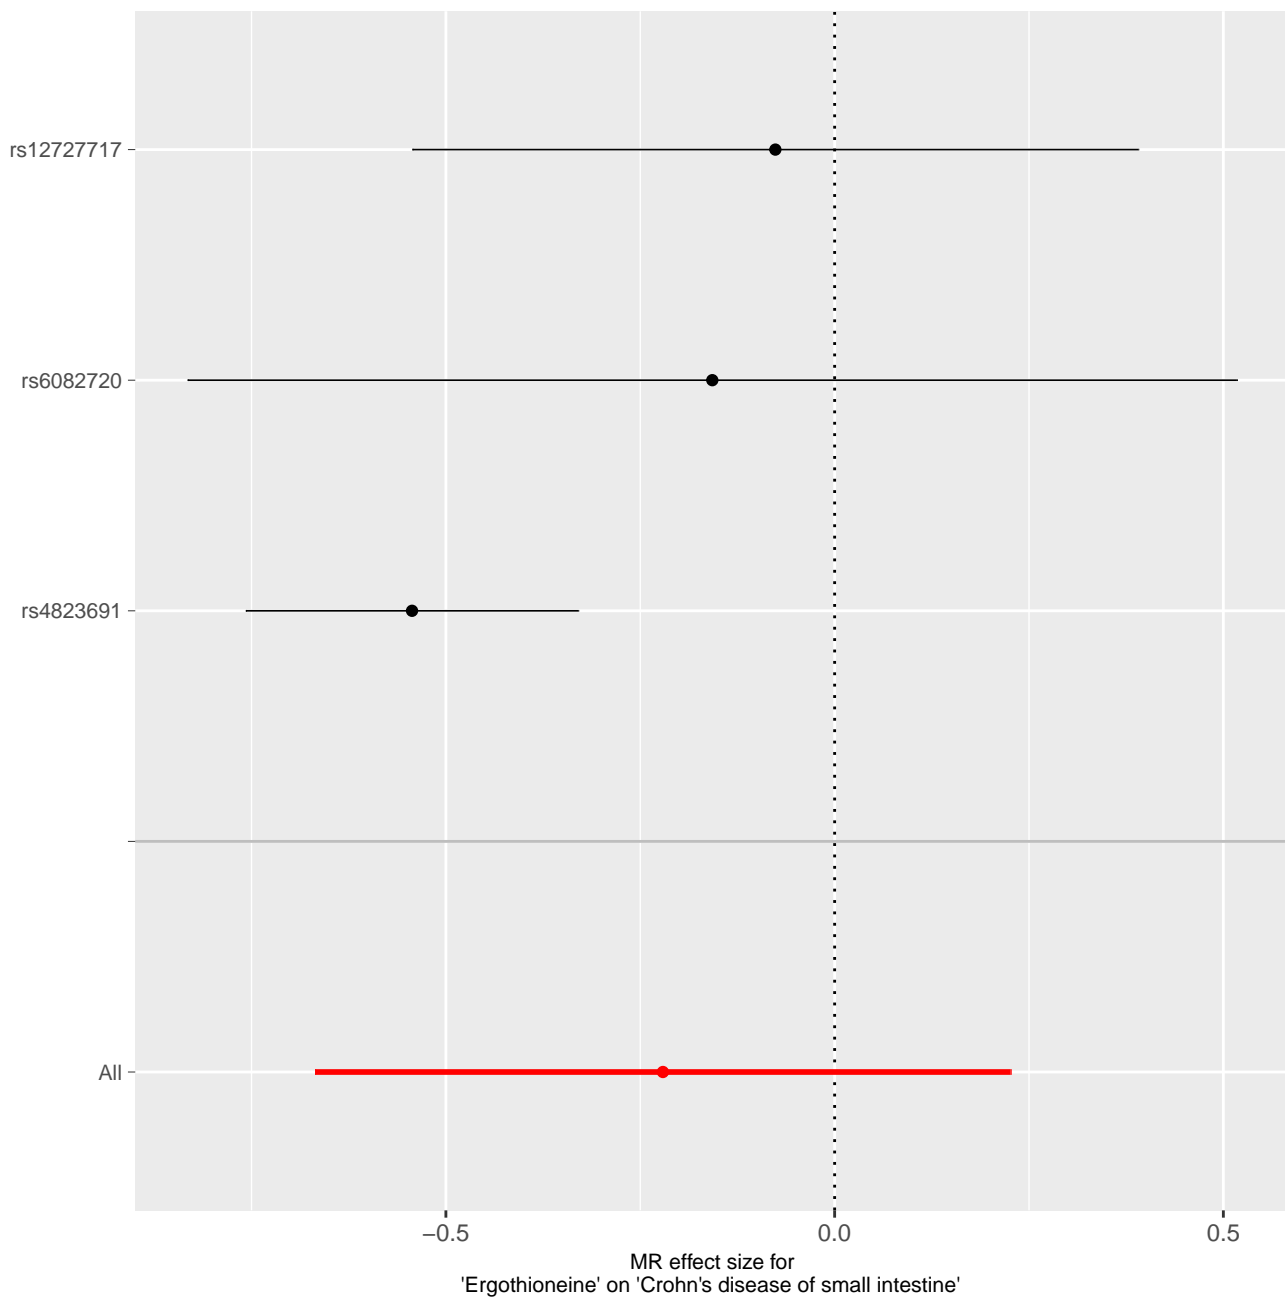

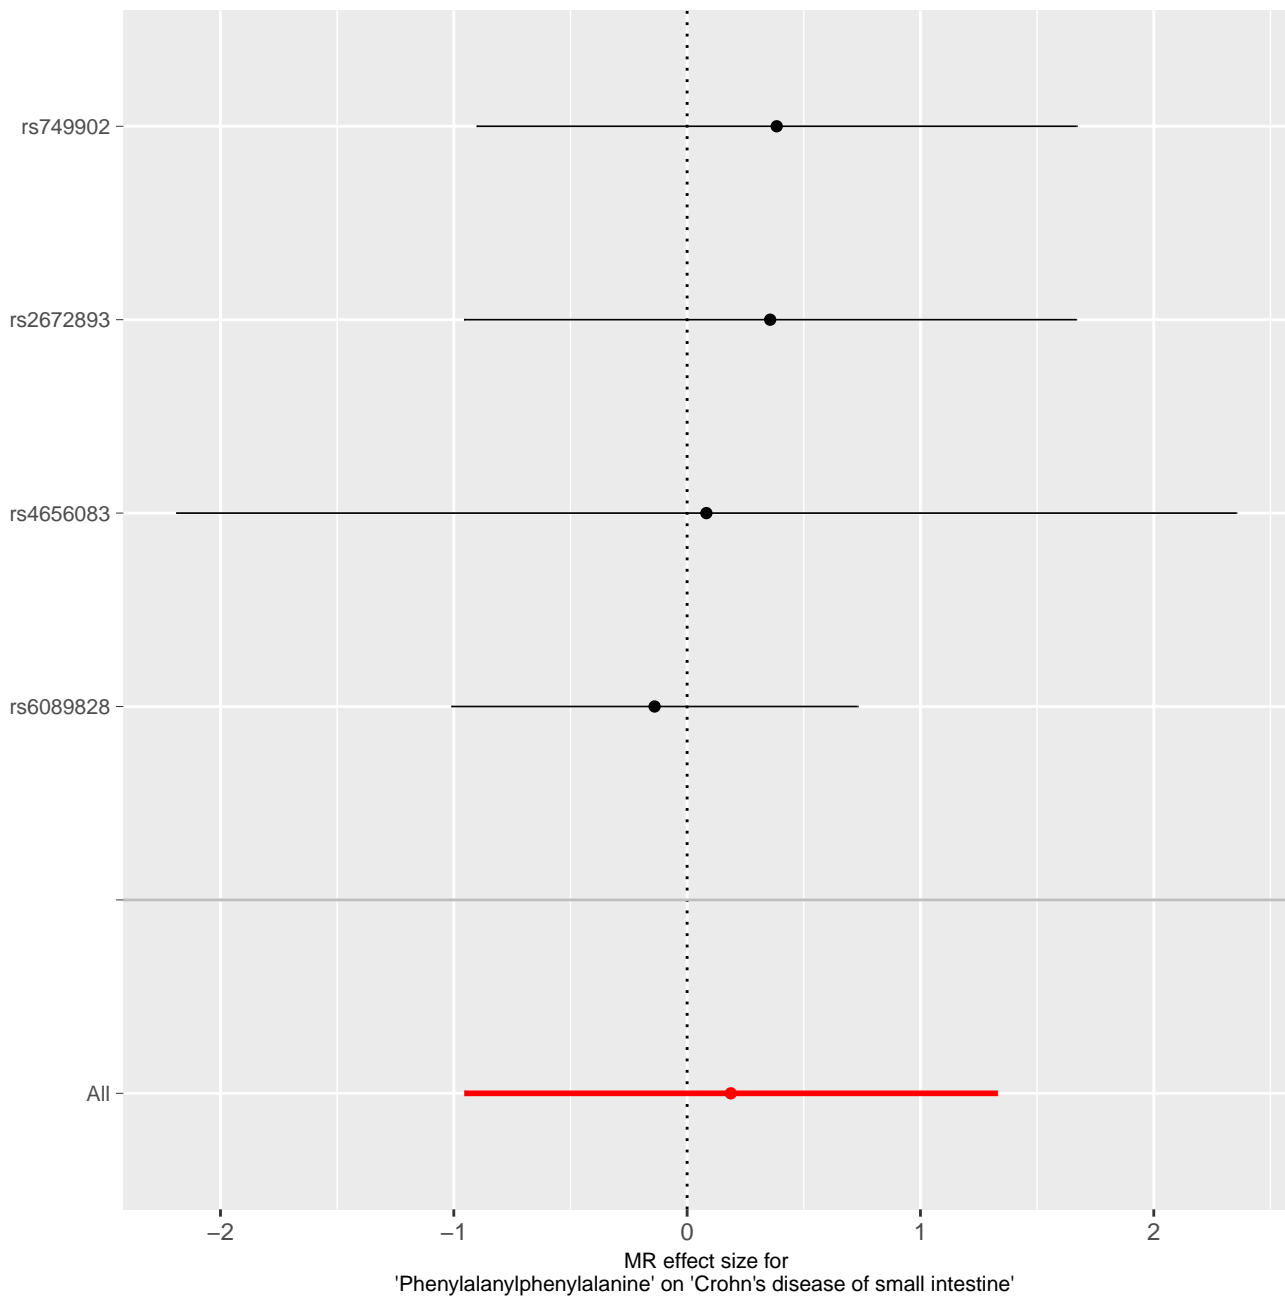

Batch 825 : 15-methylpalmitate (isobar with 2-methylpalmitate) on Crohn's disease of small intestine

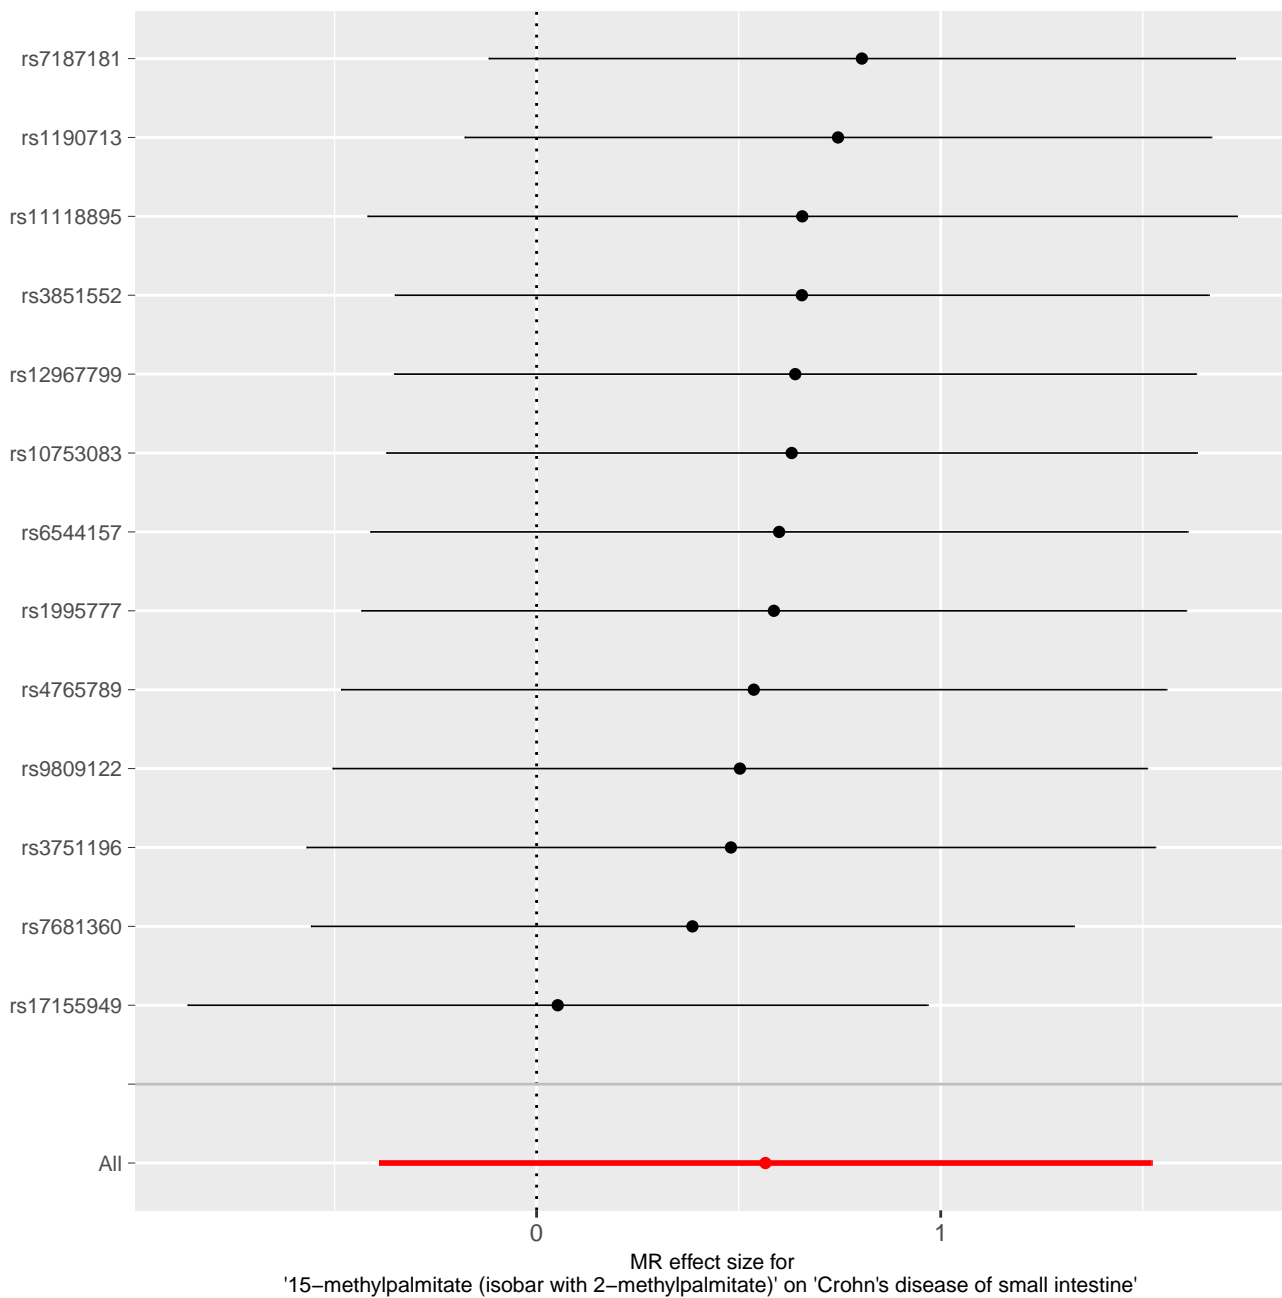

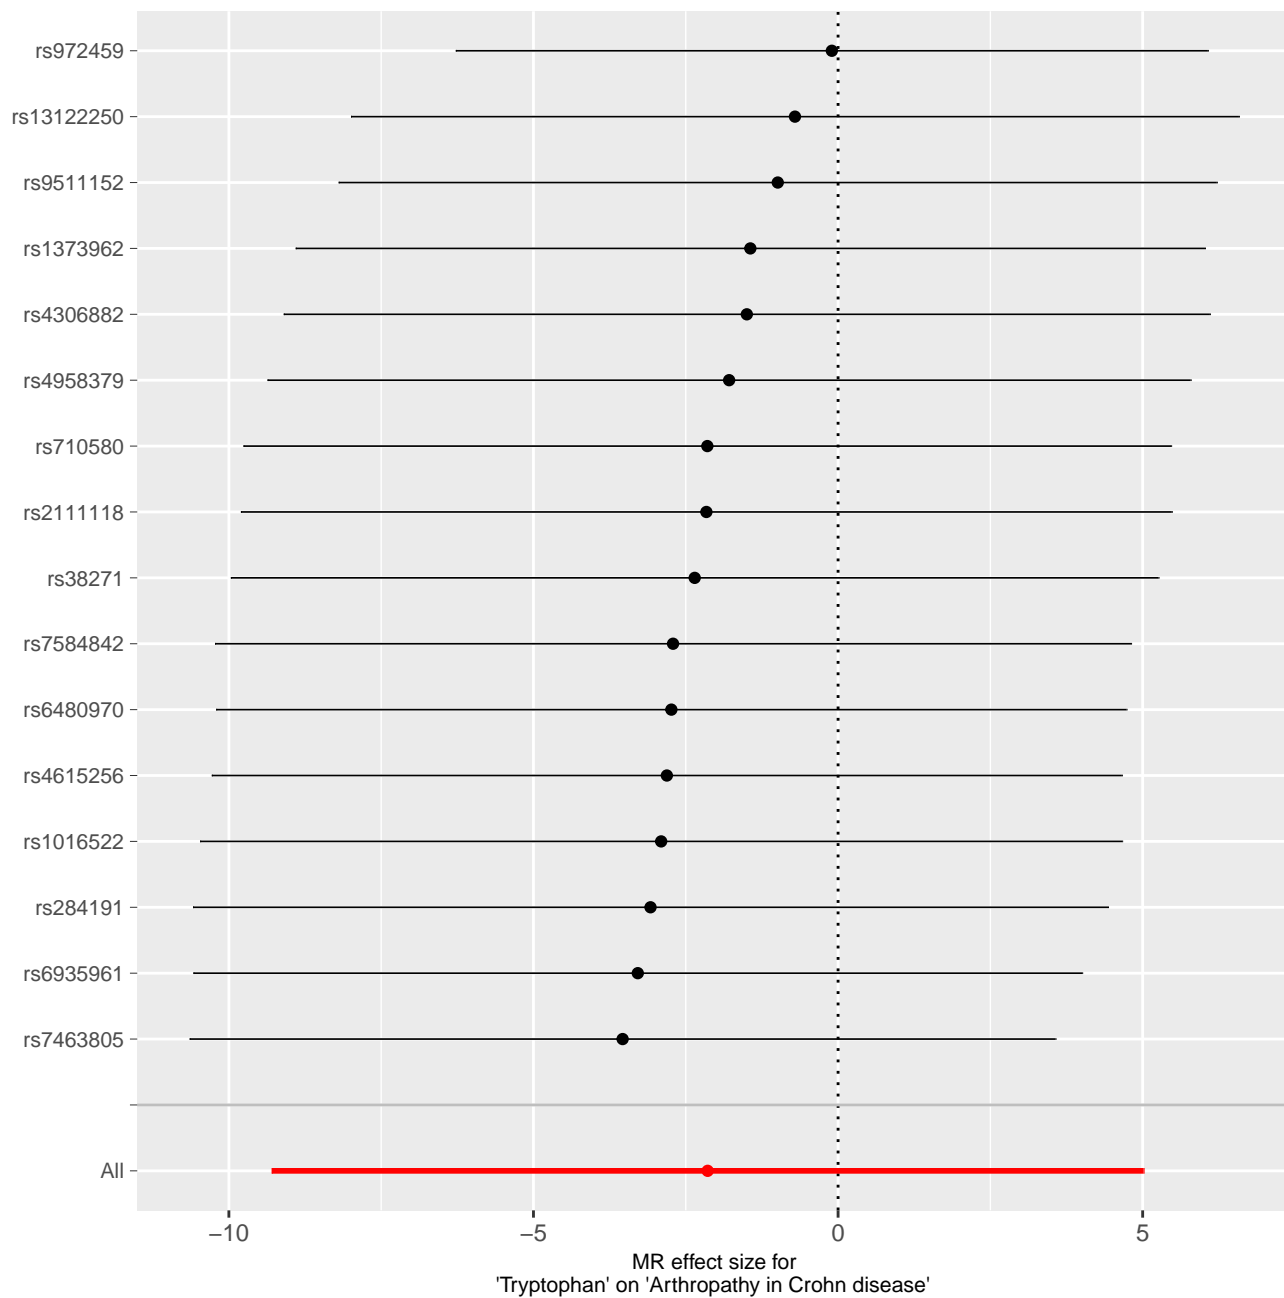

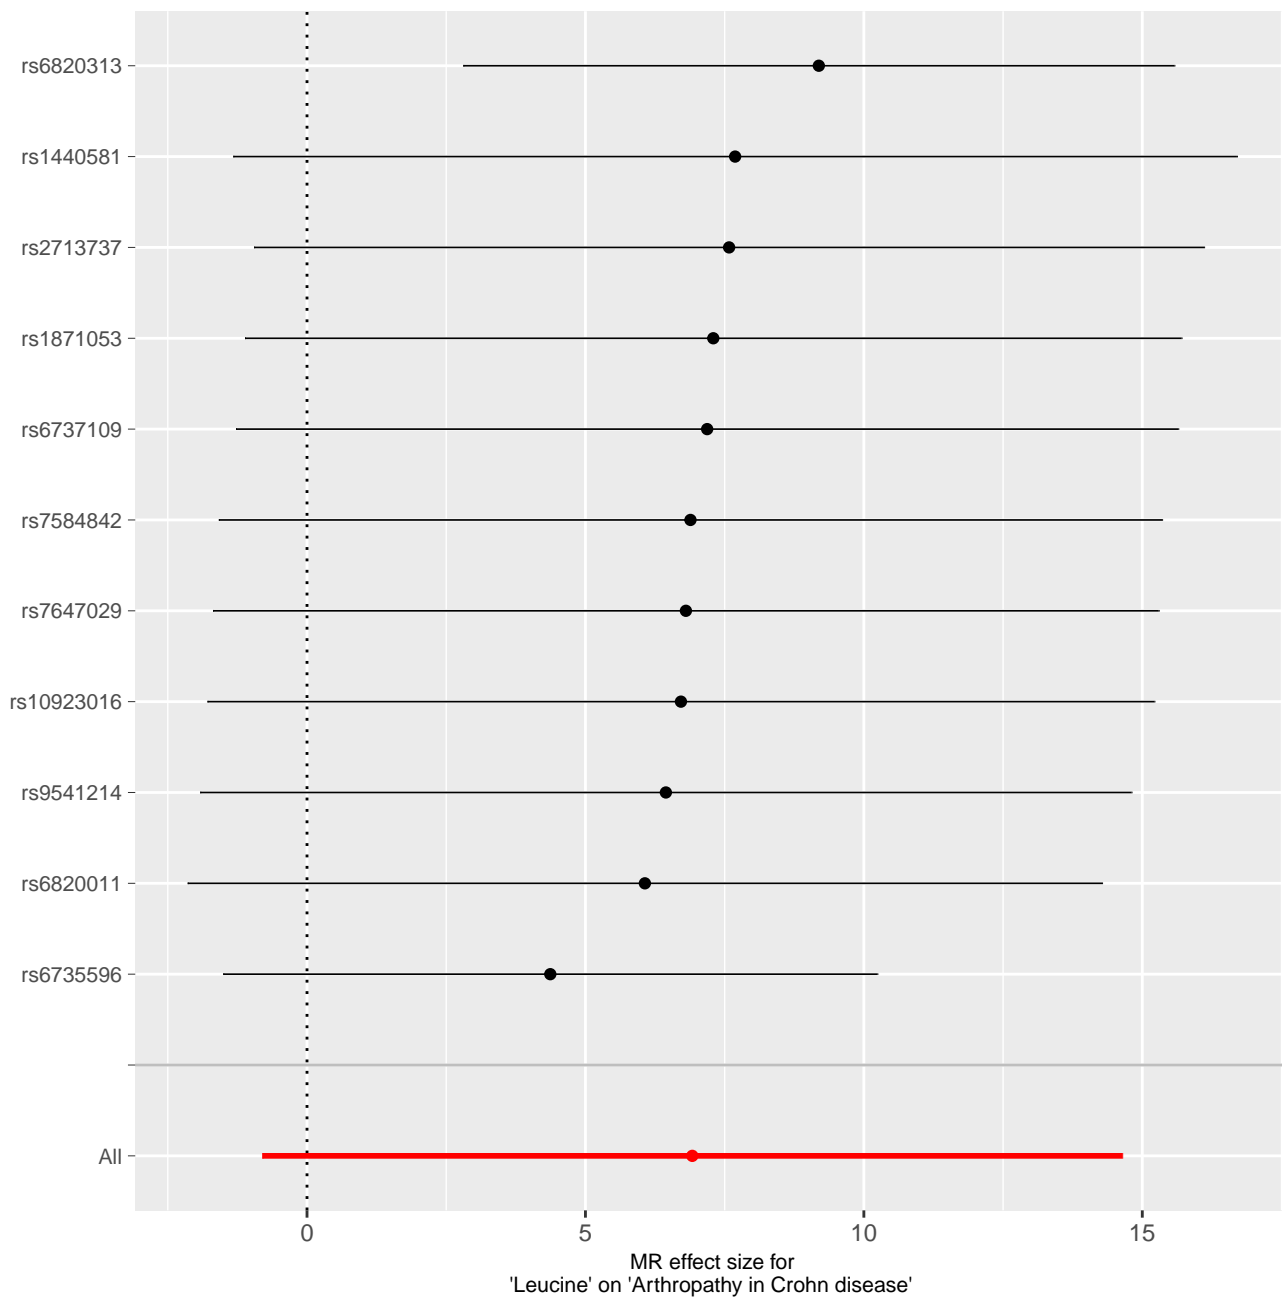



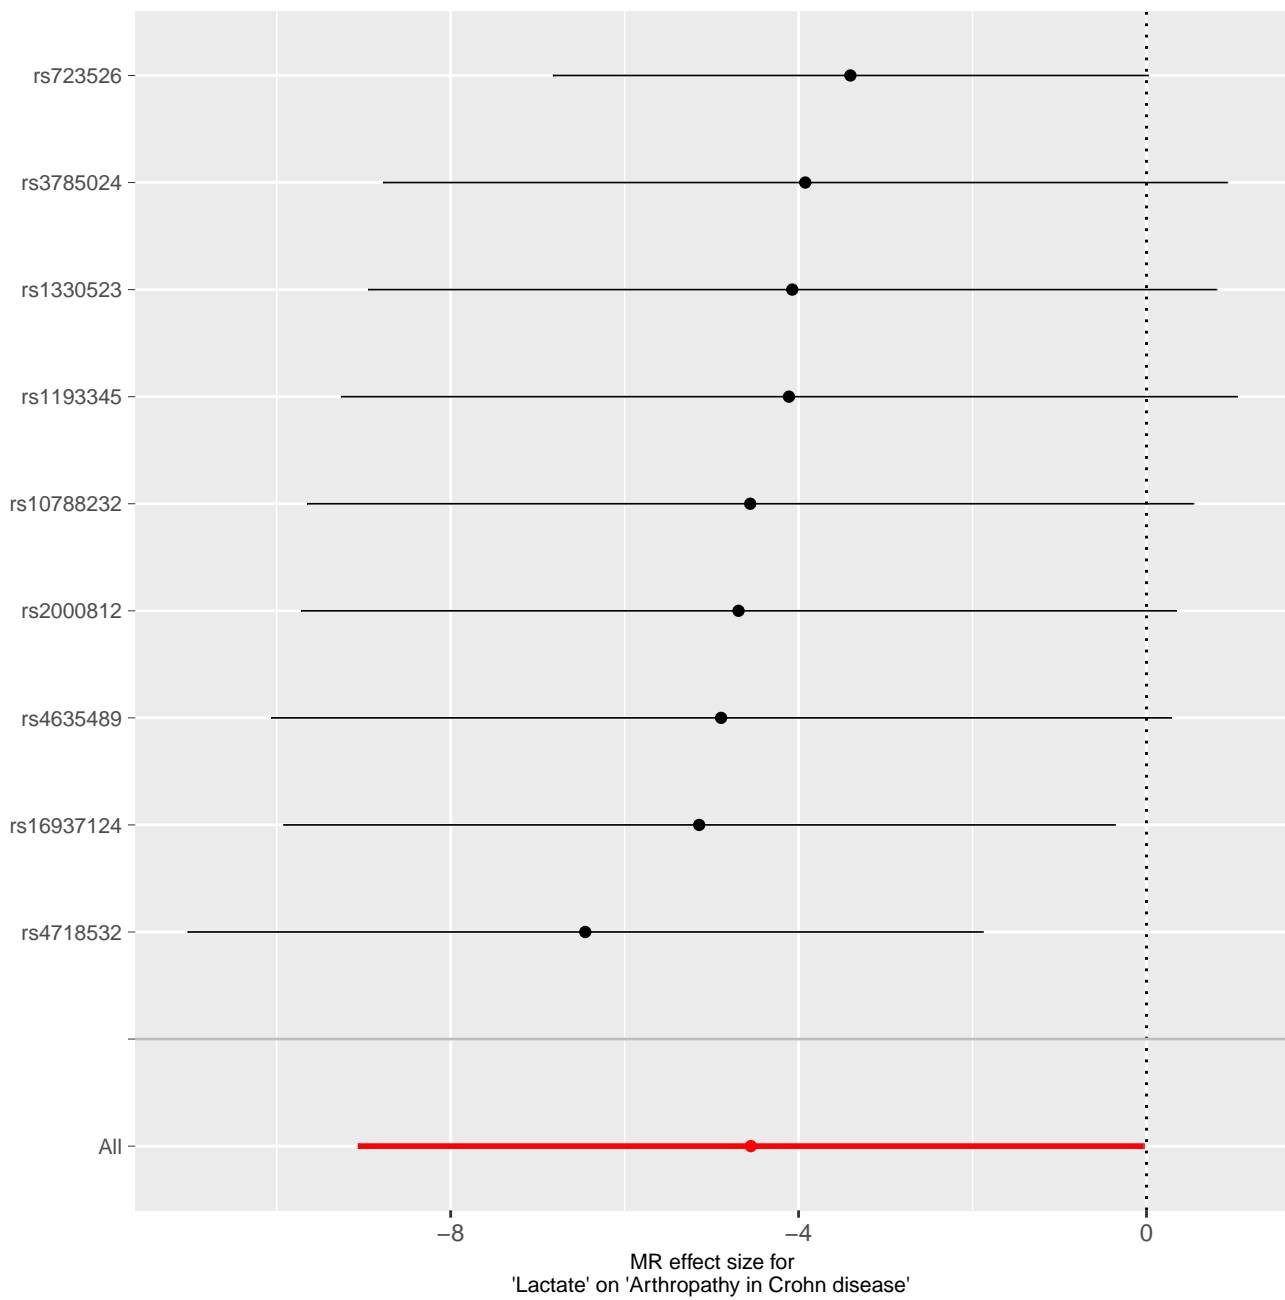

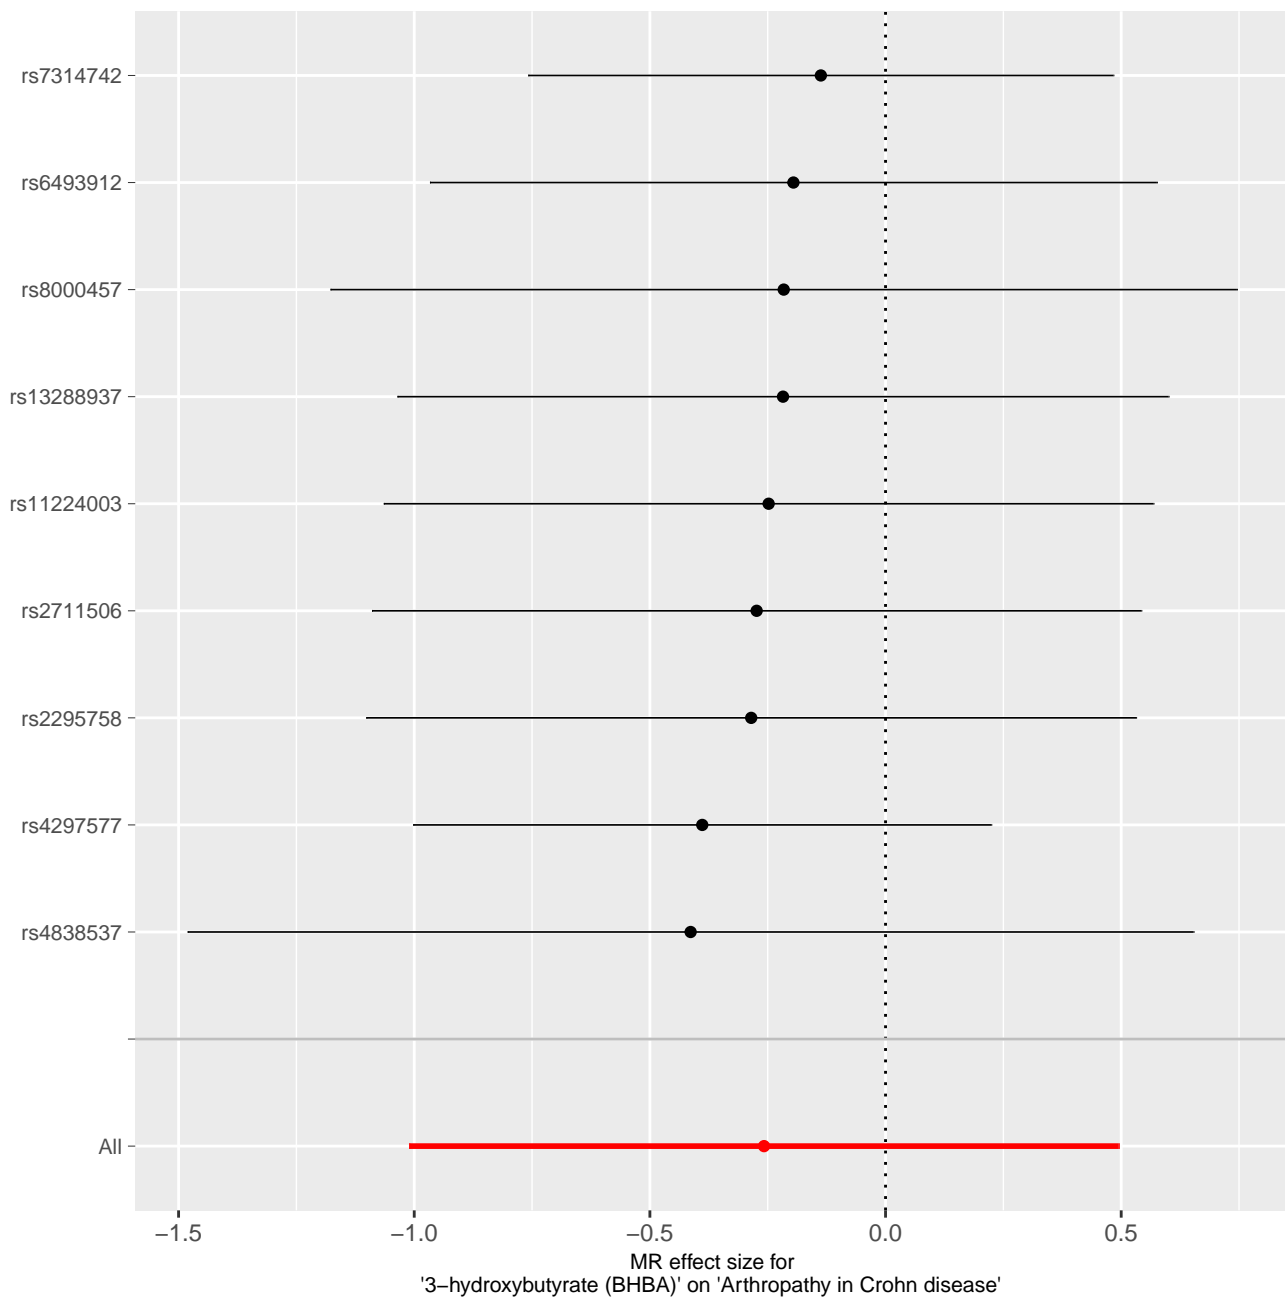

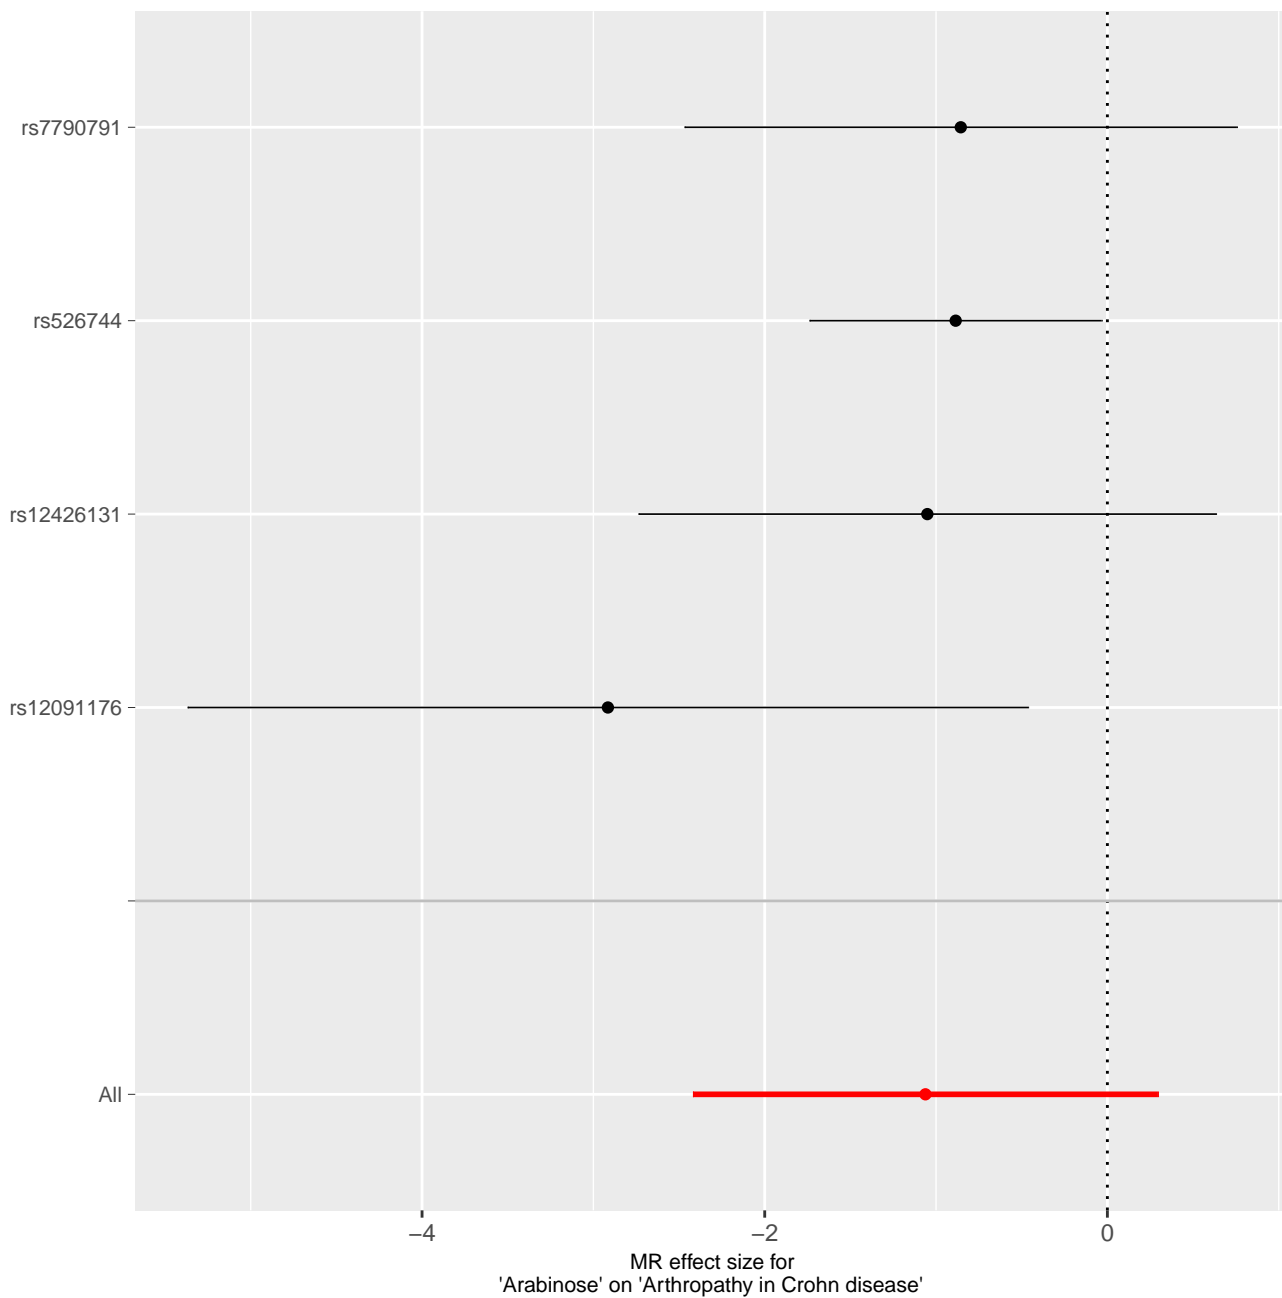

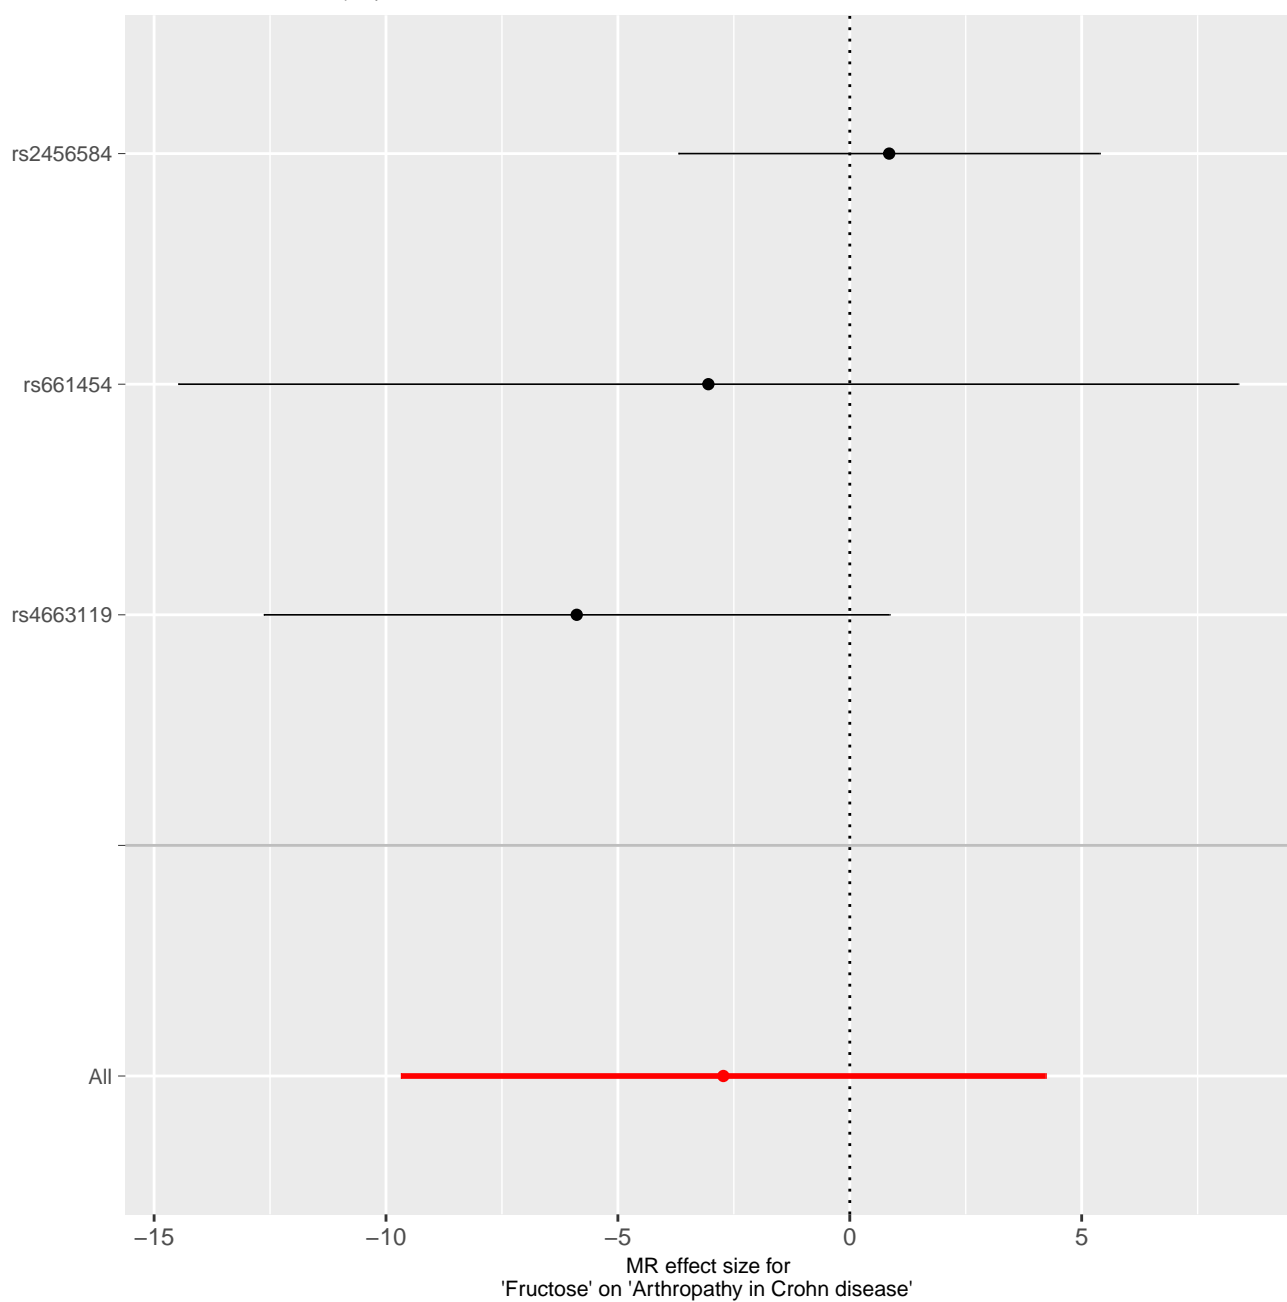

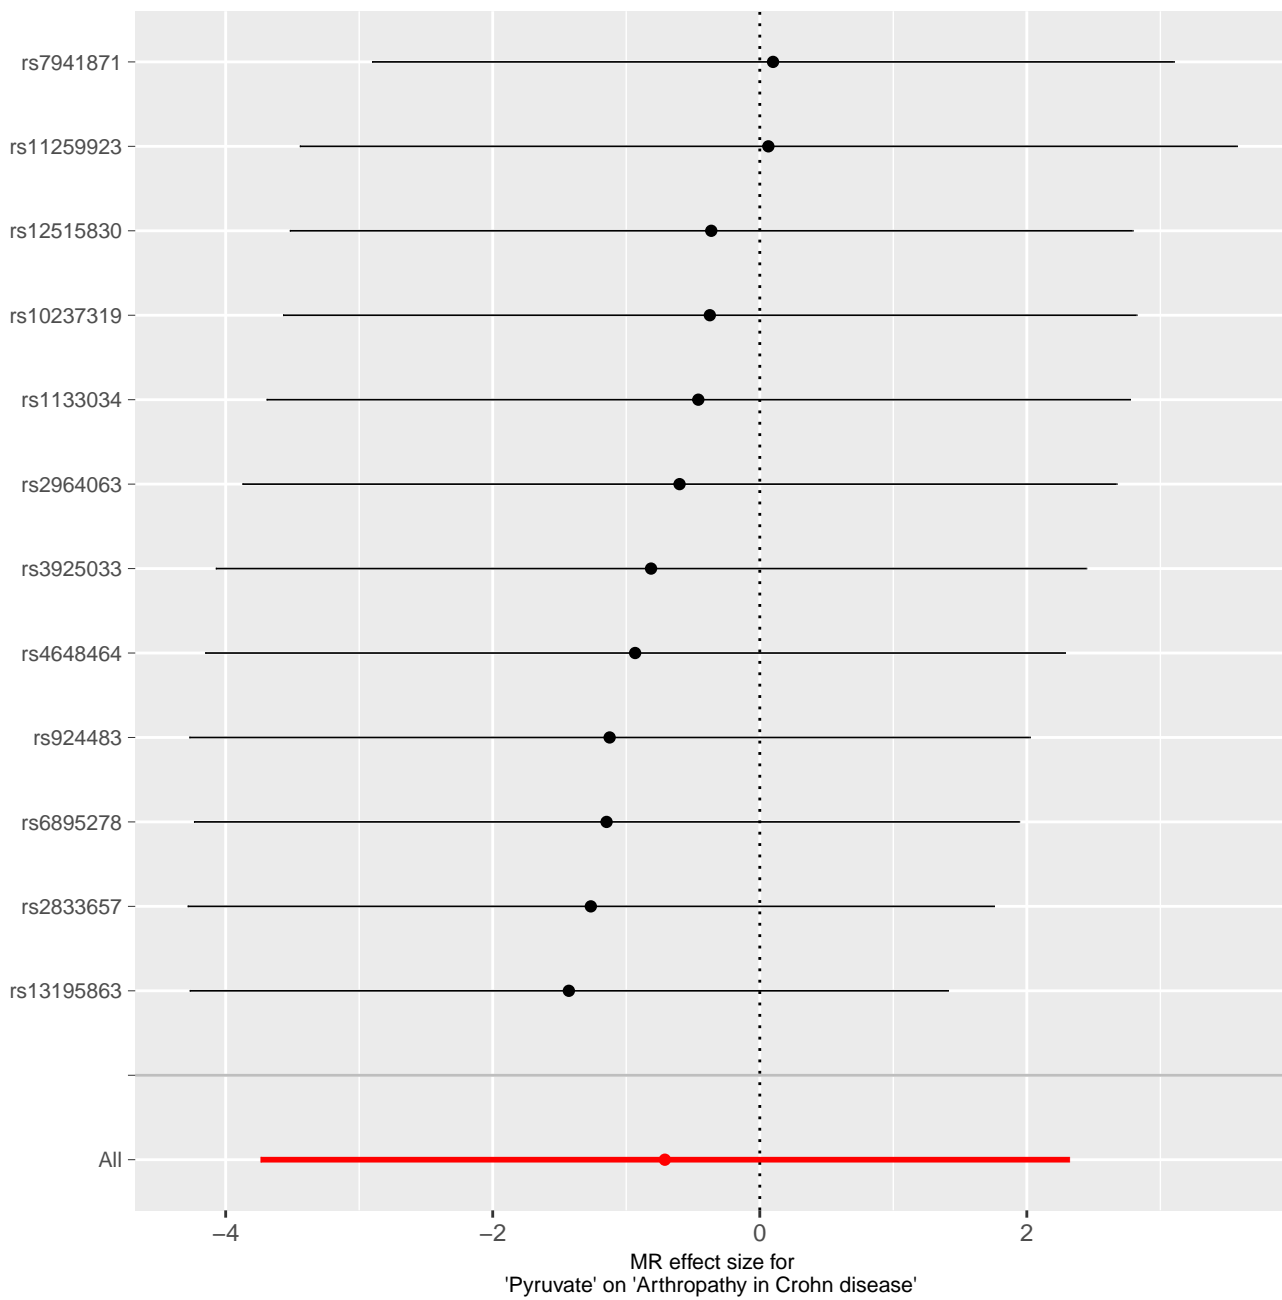

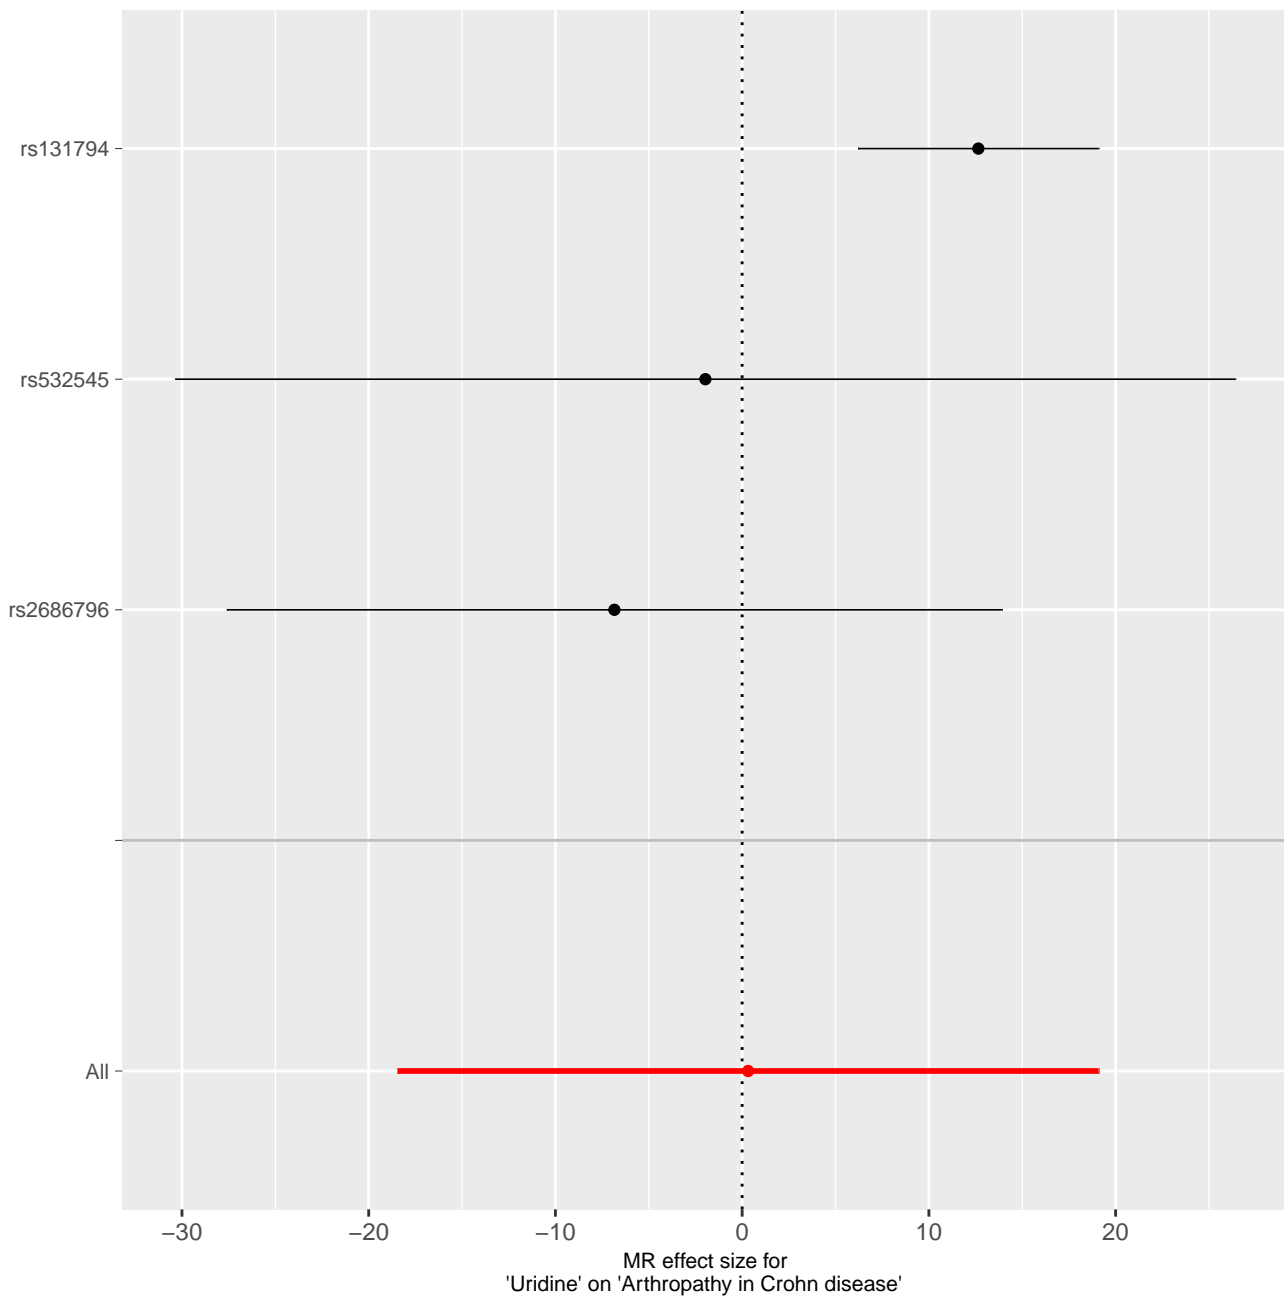

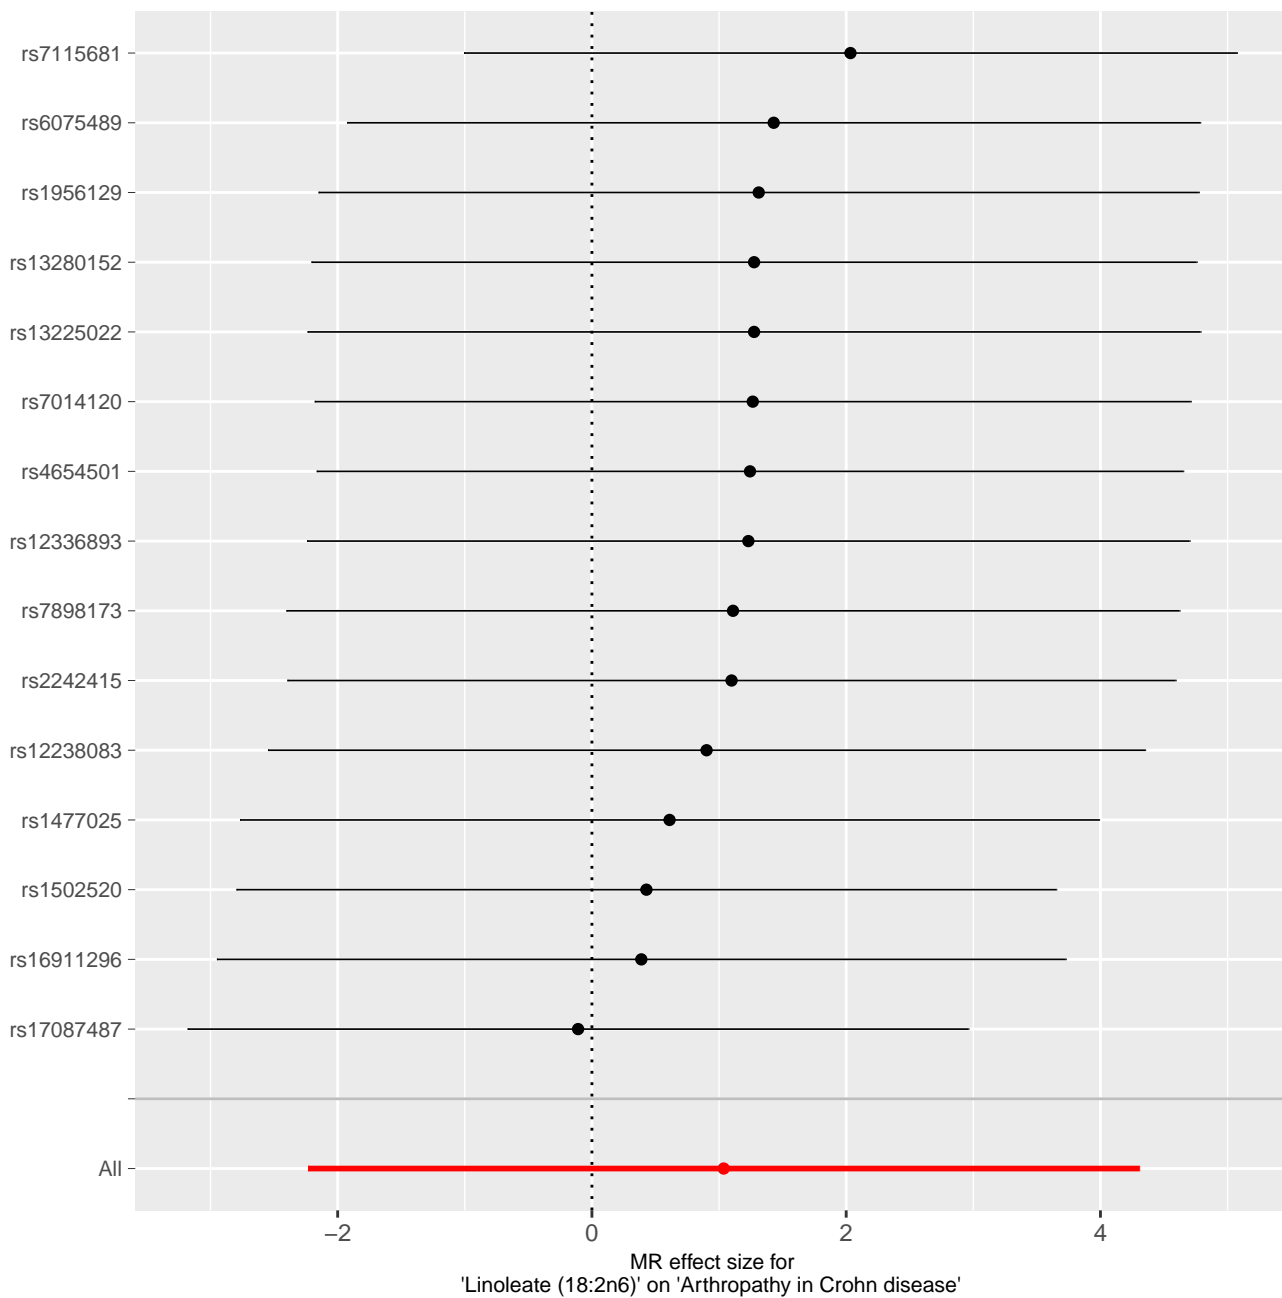

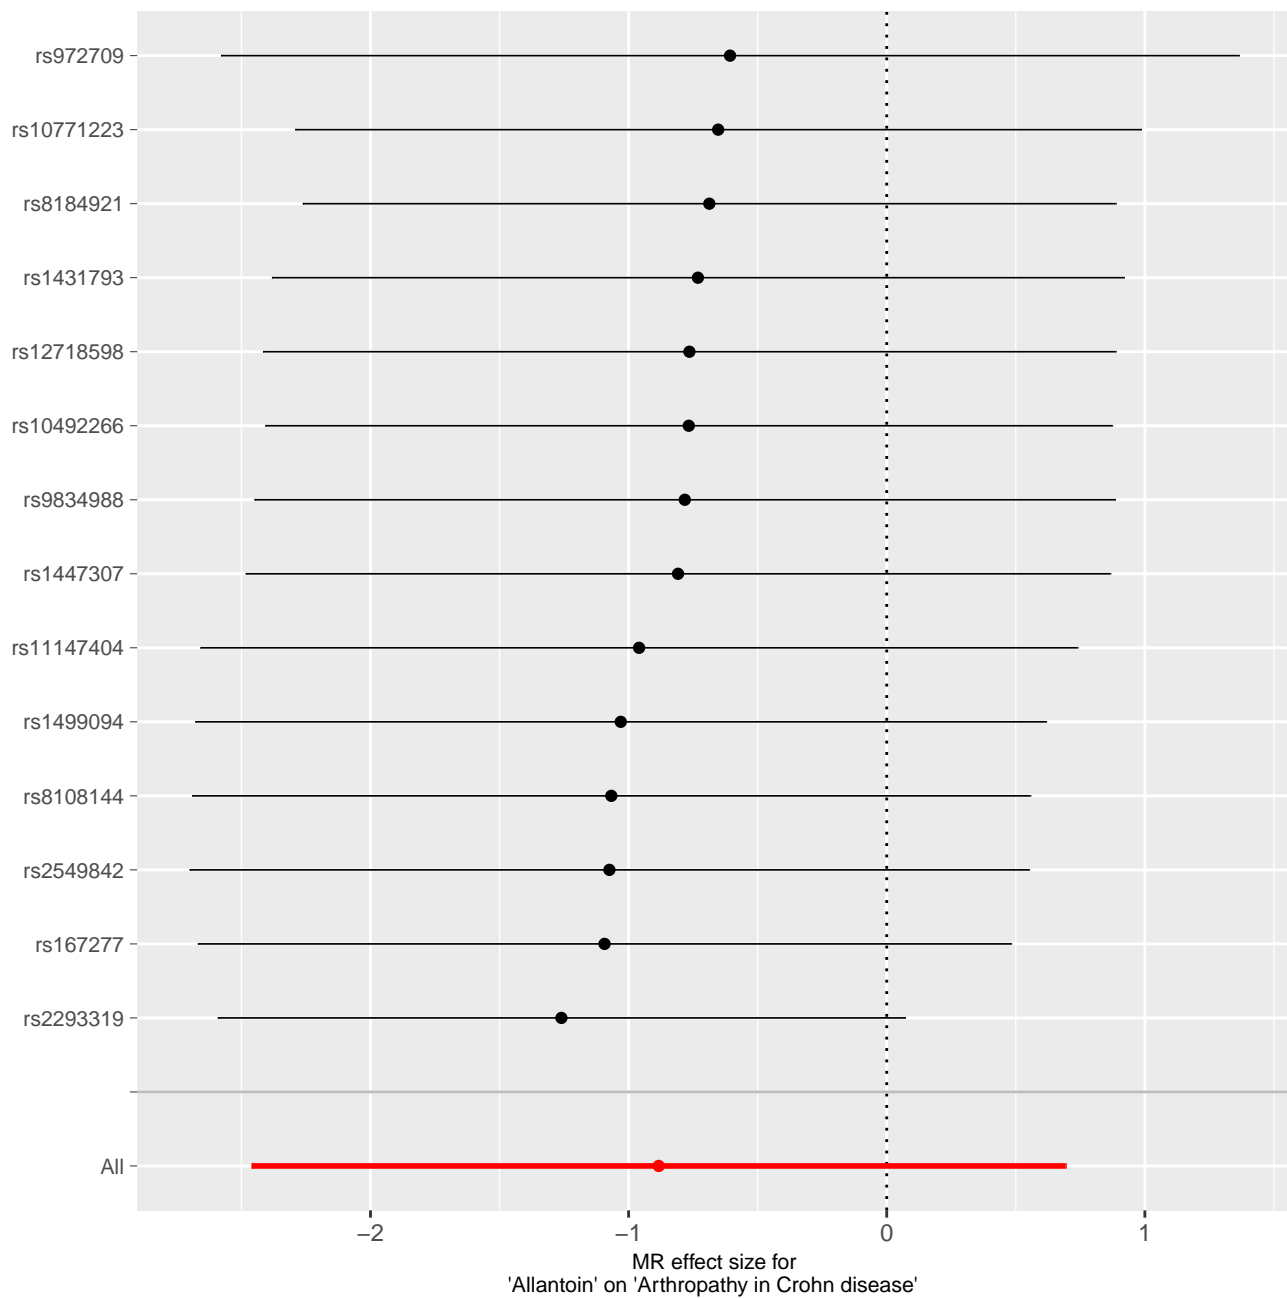



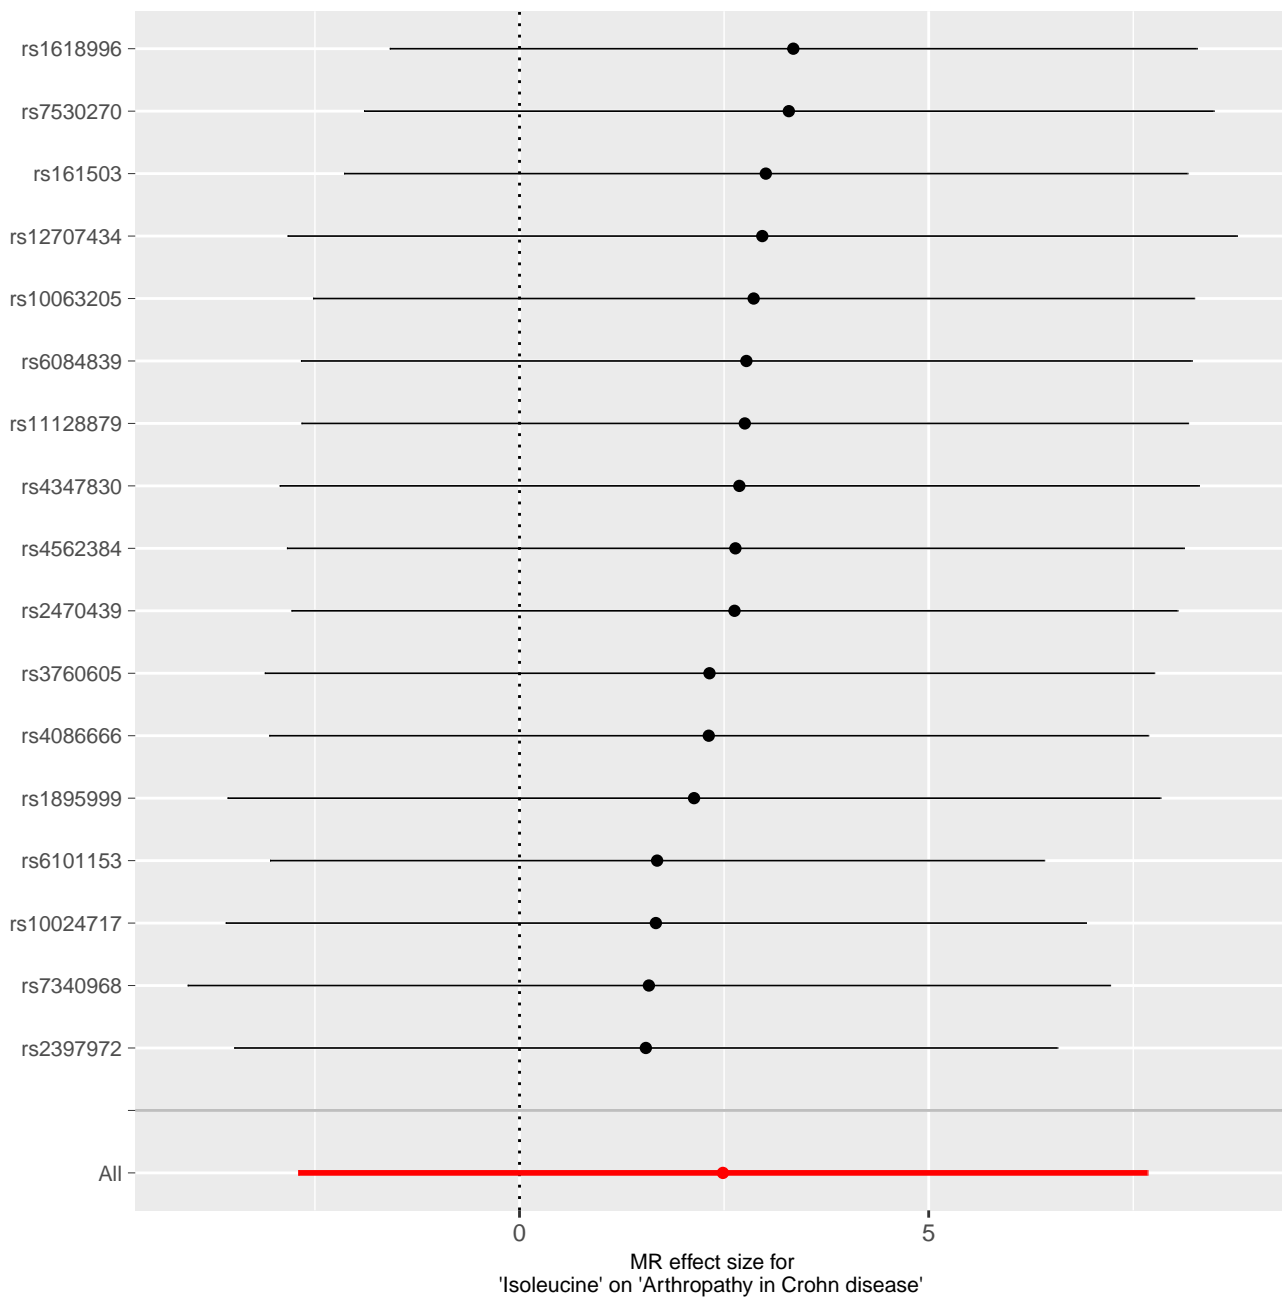

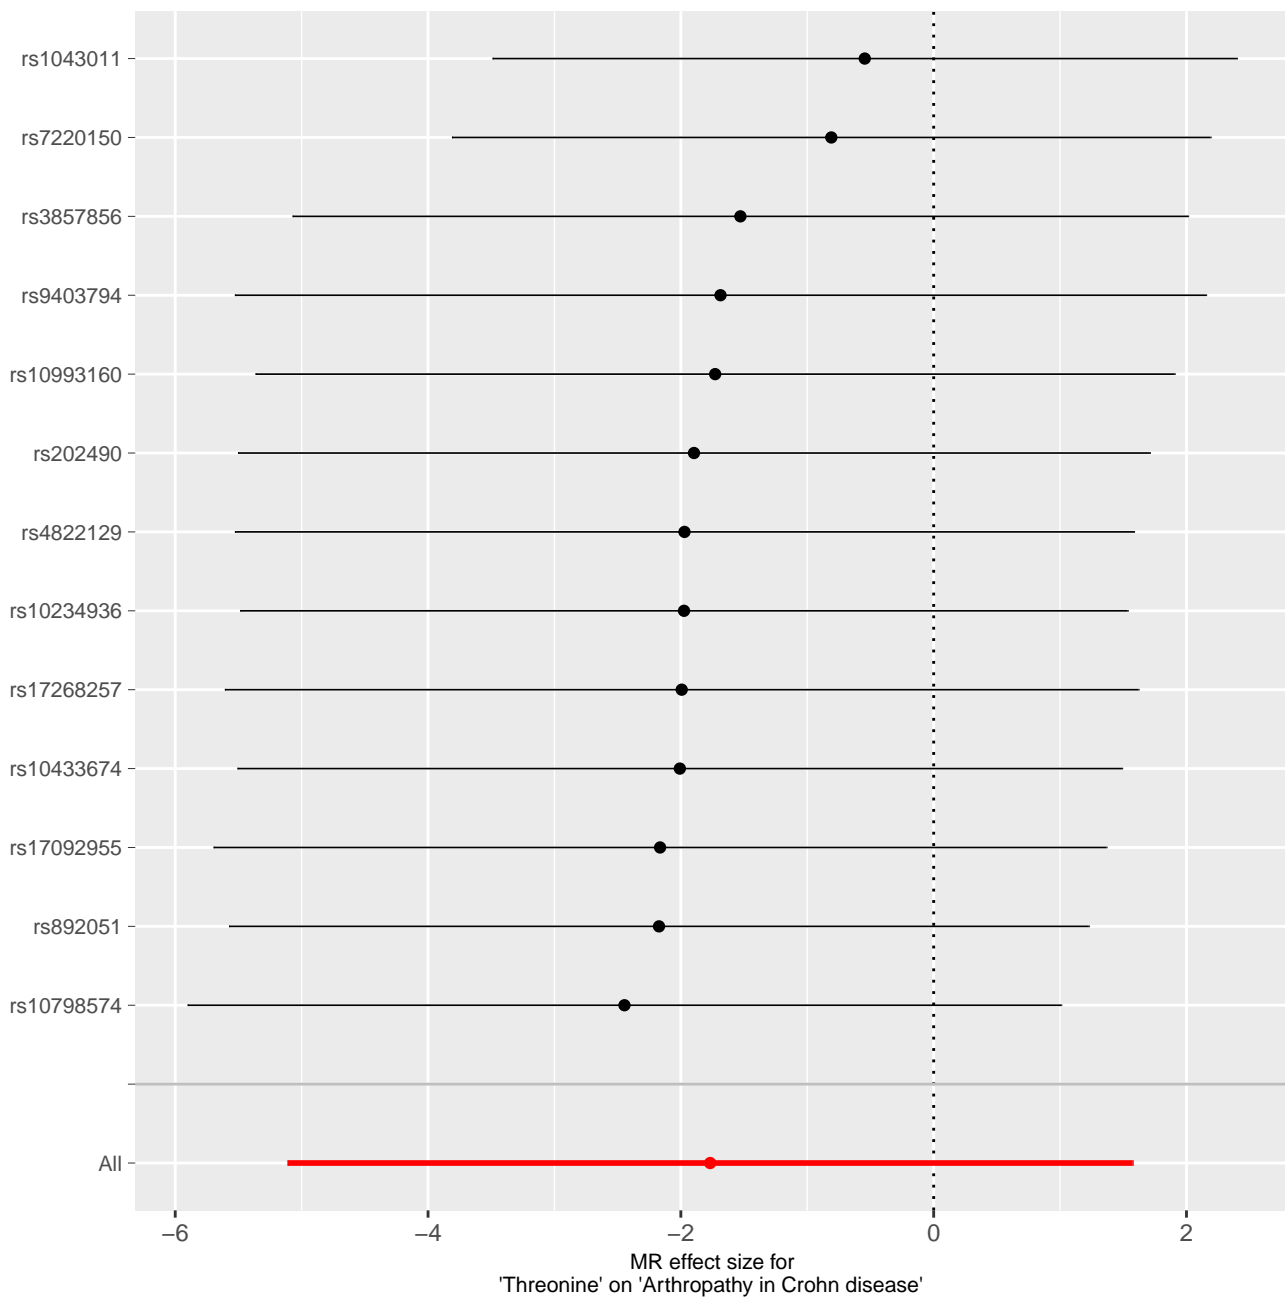

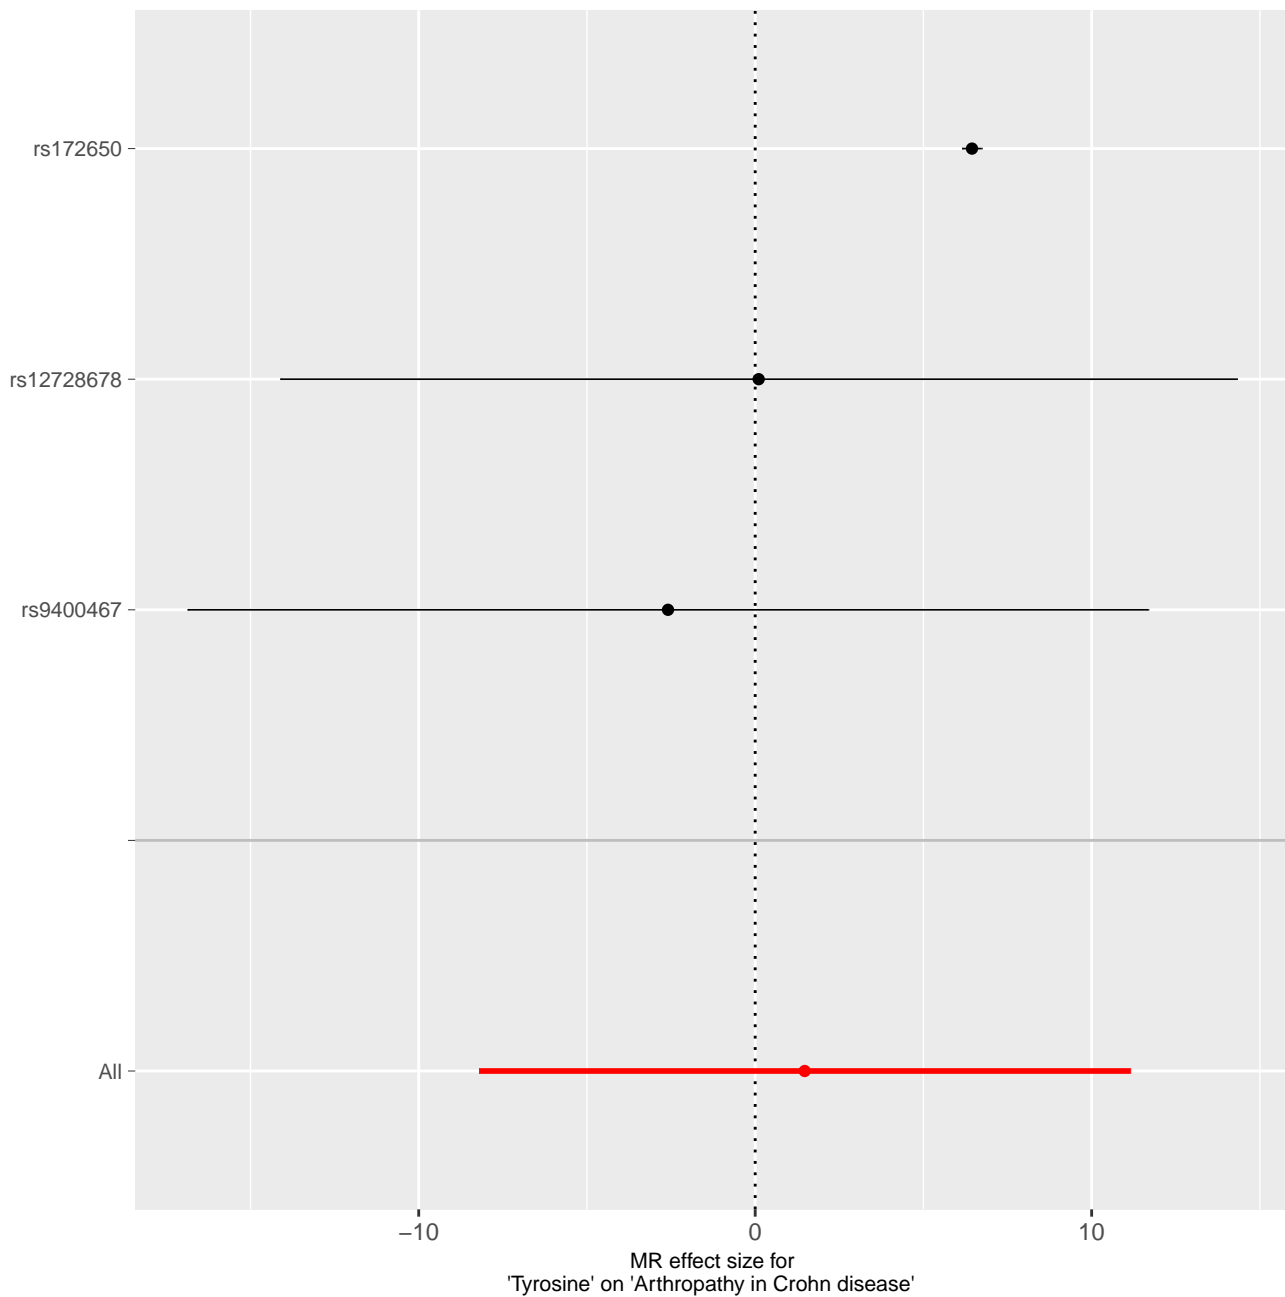

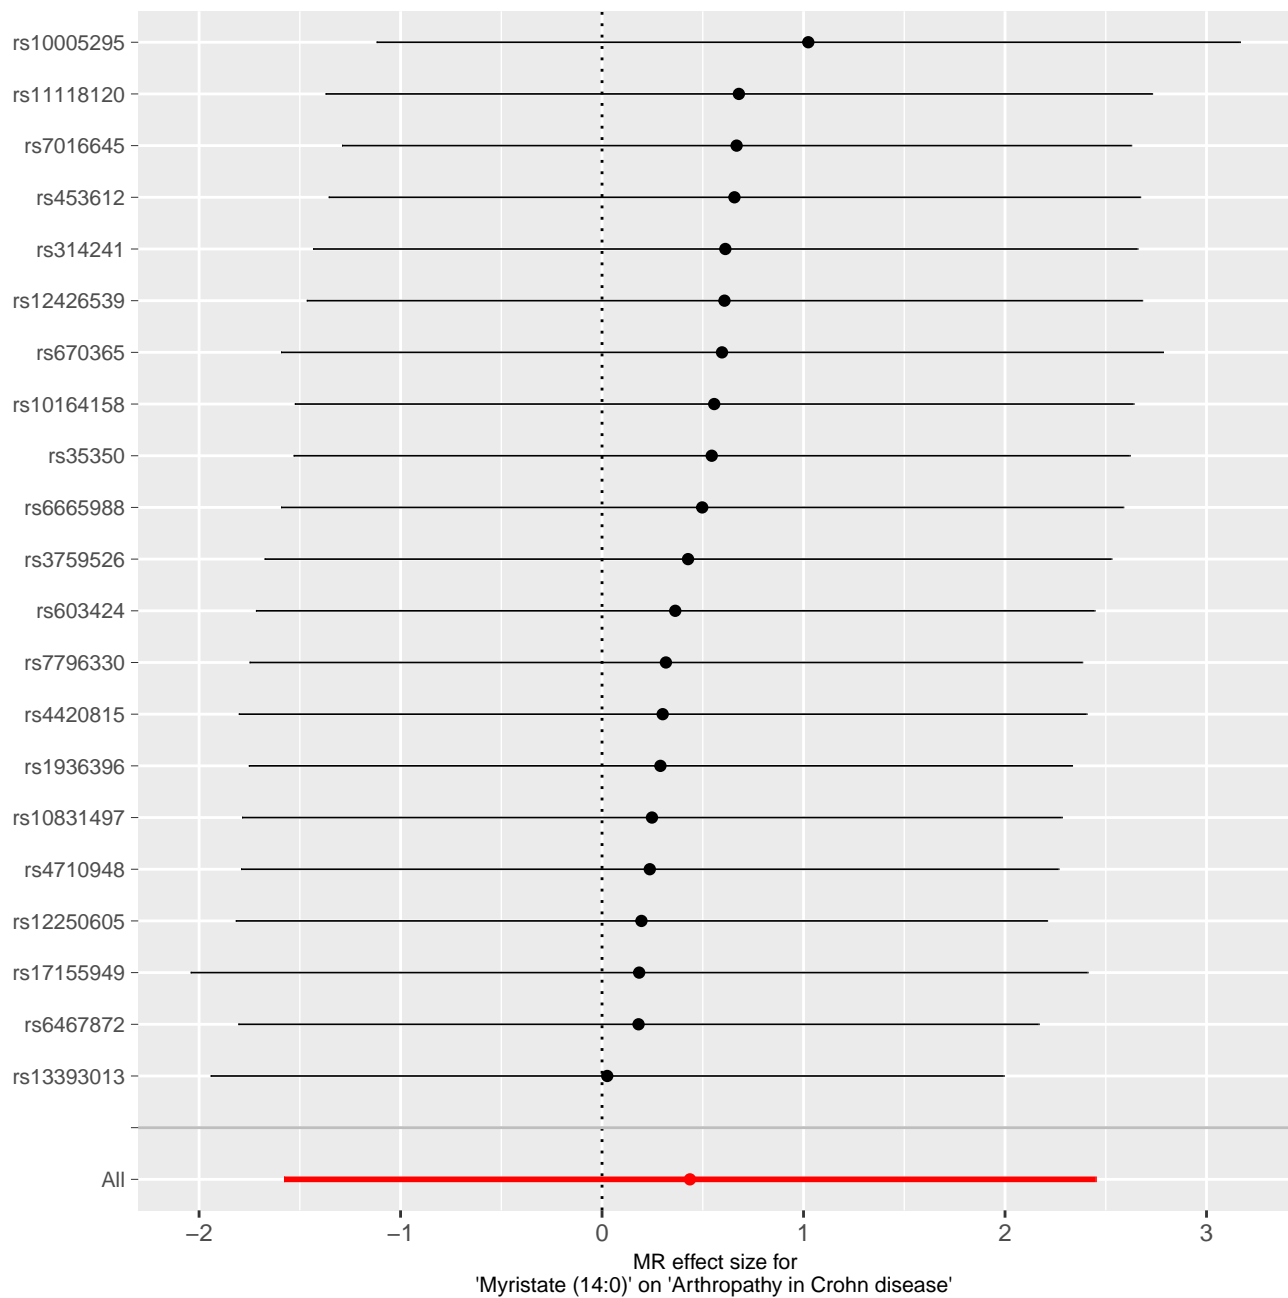

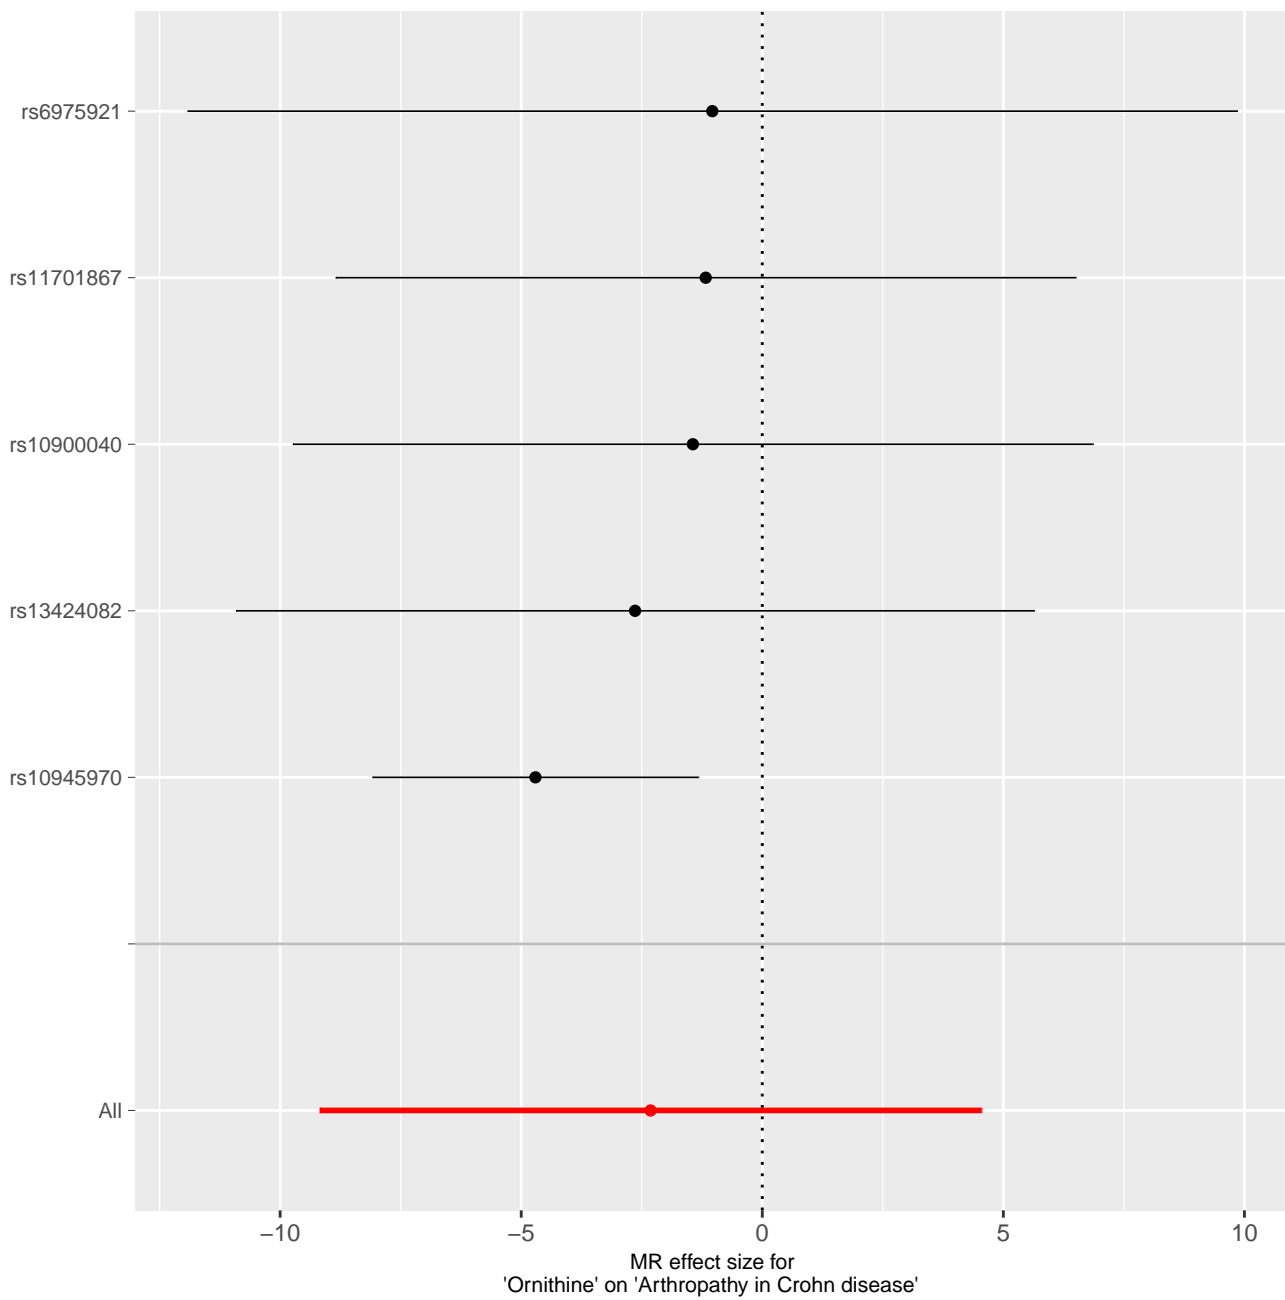

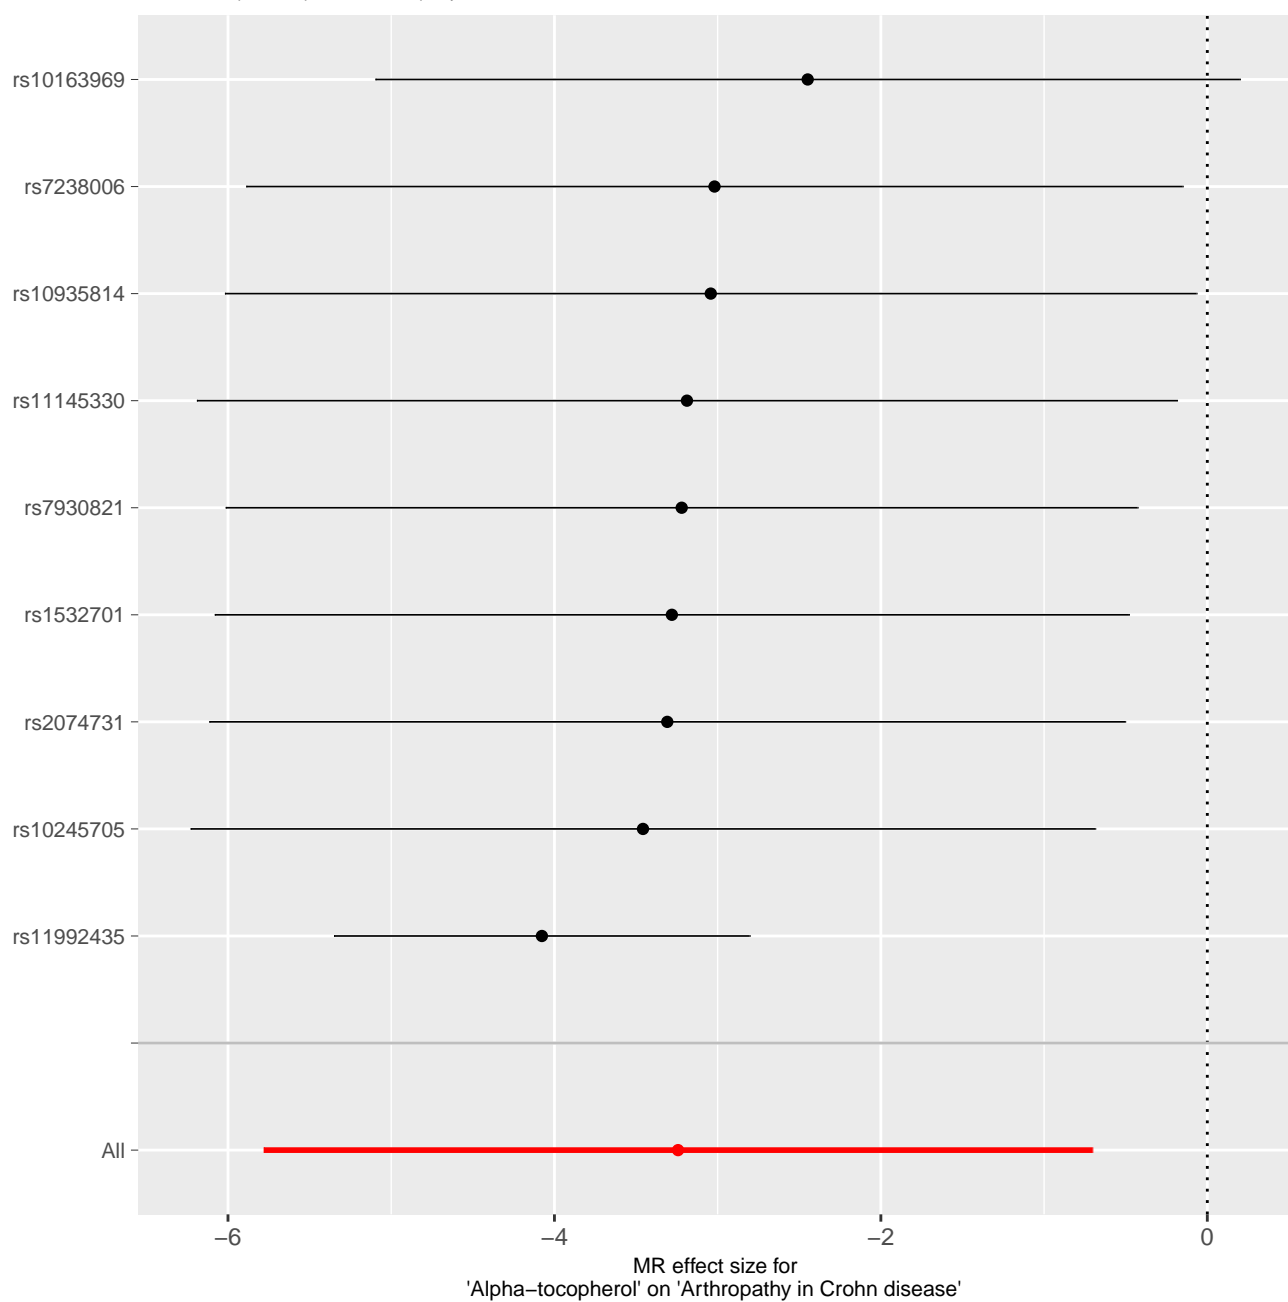

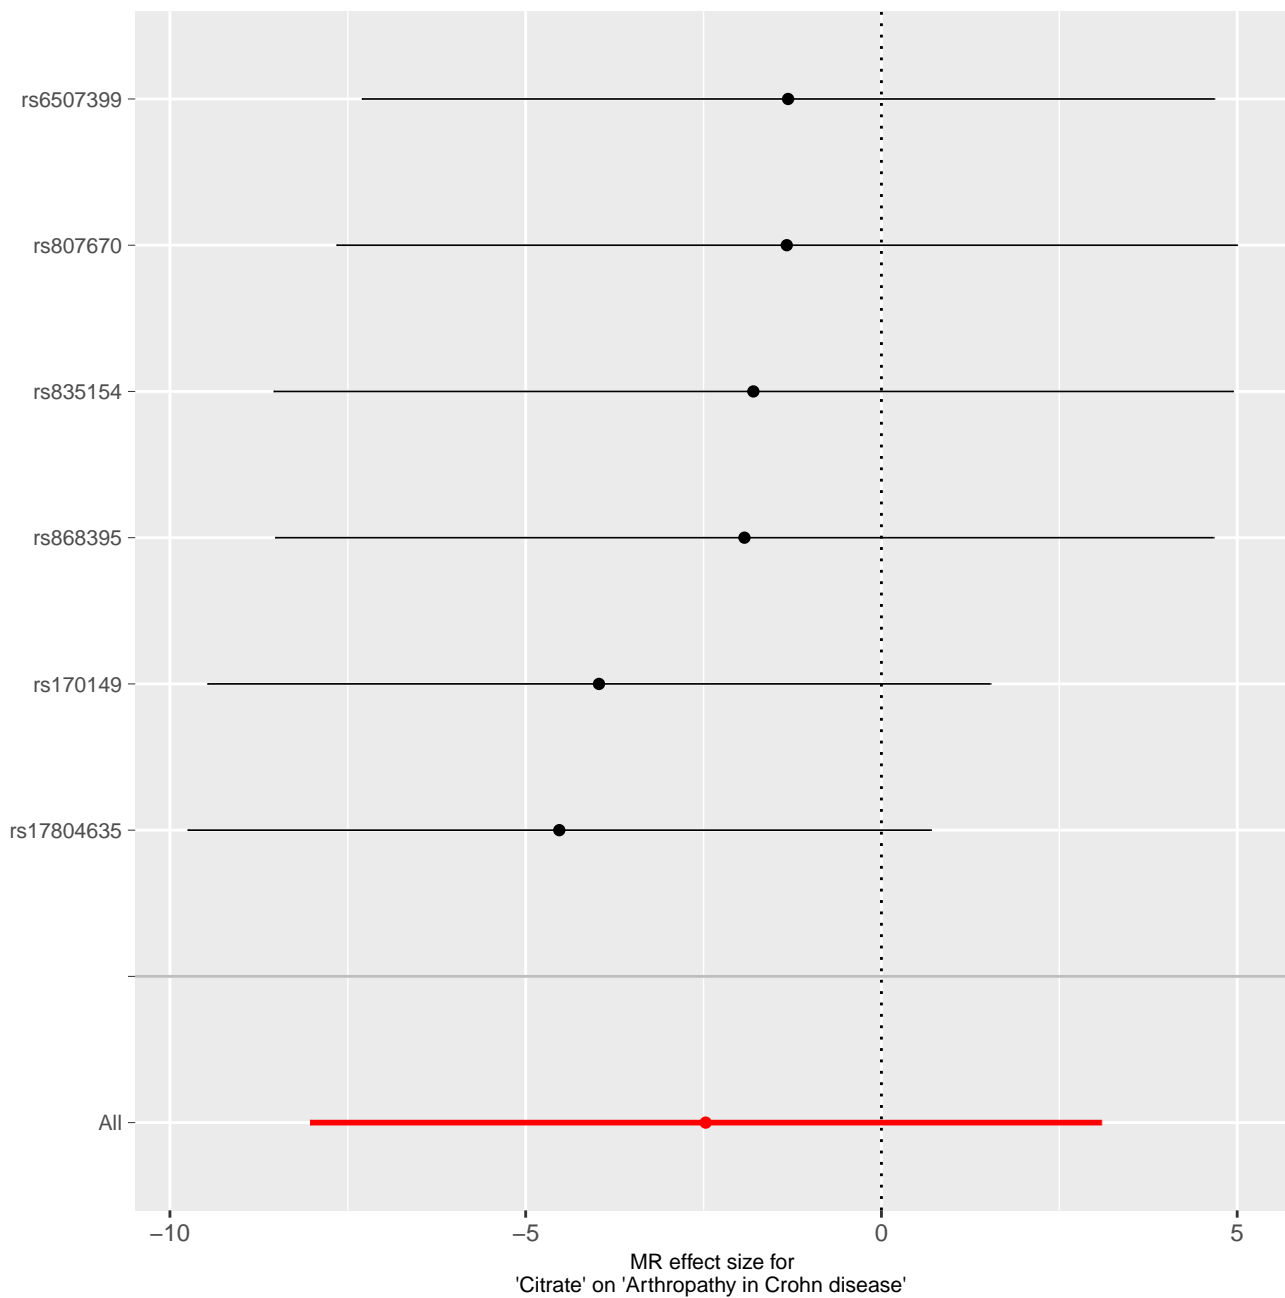

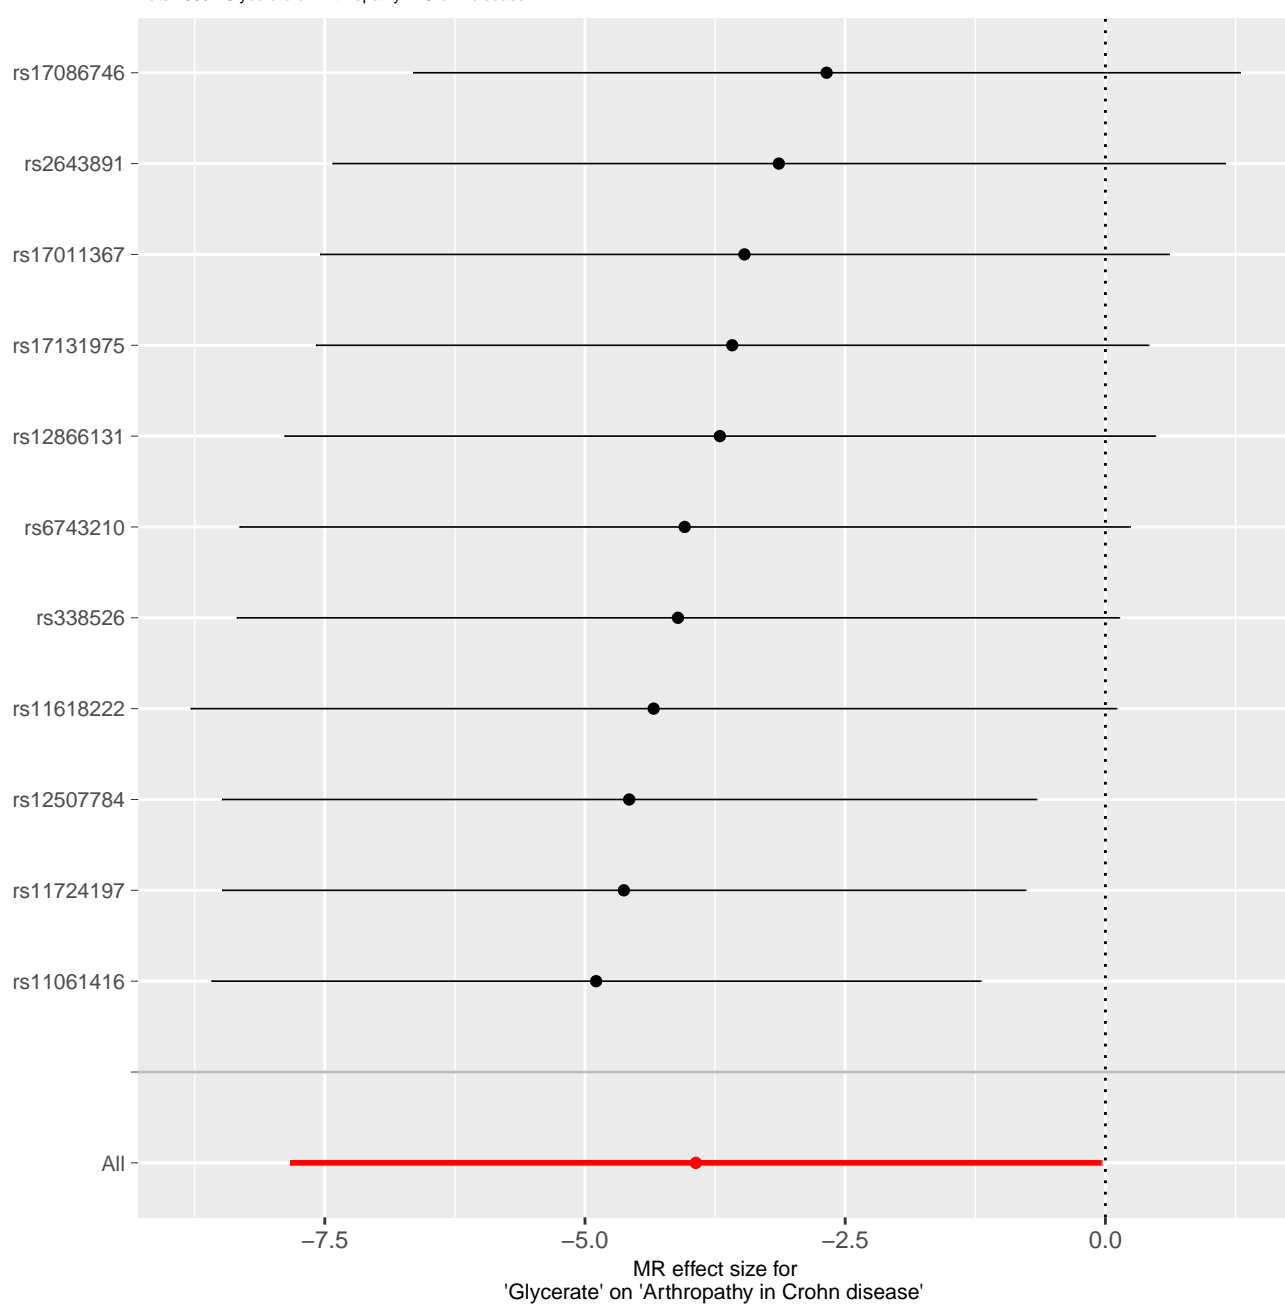



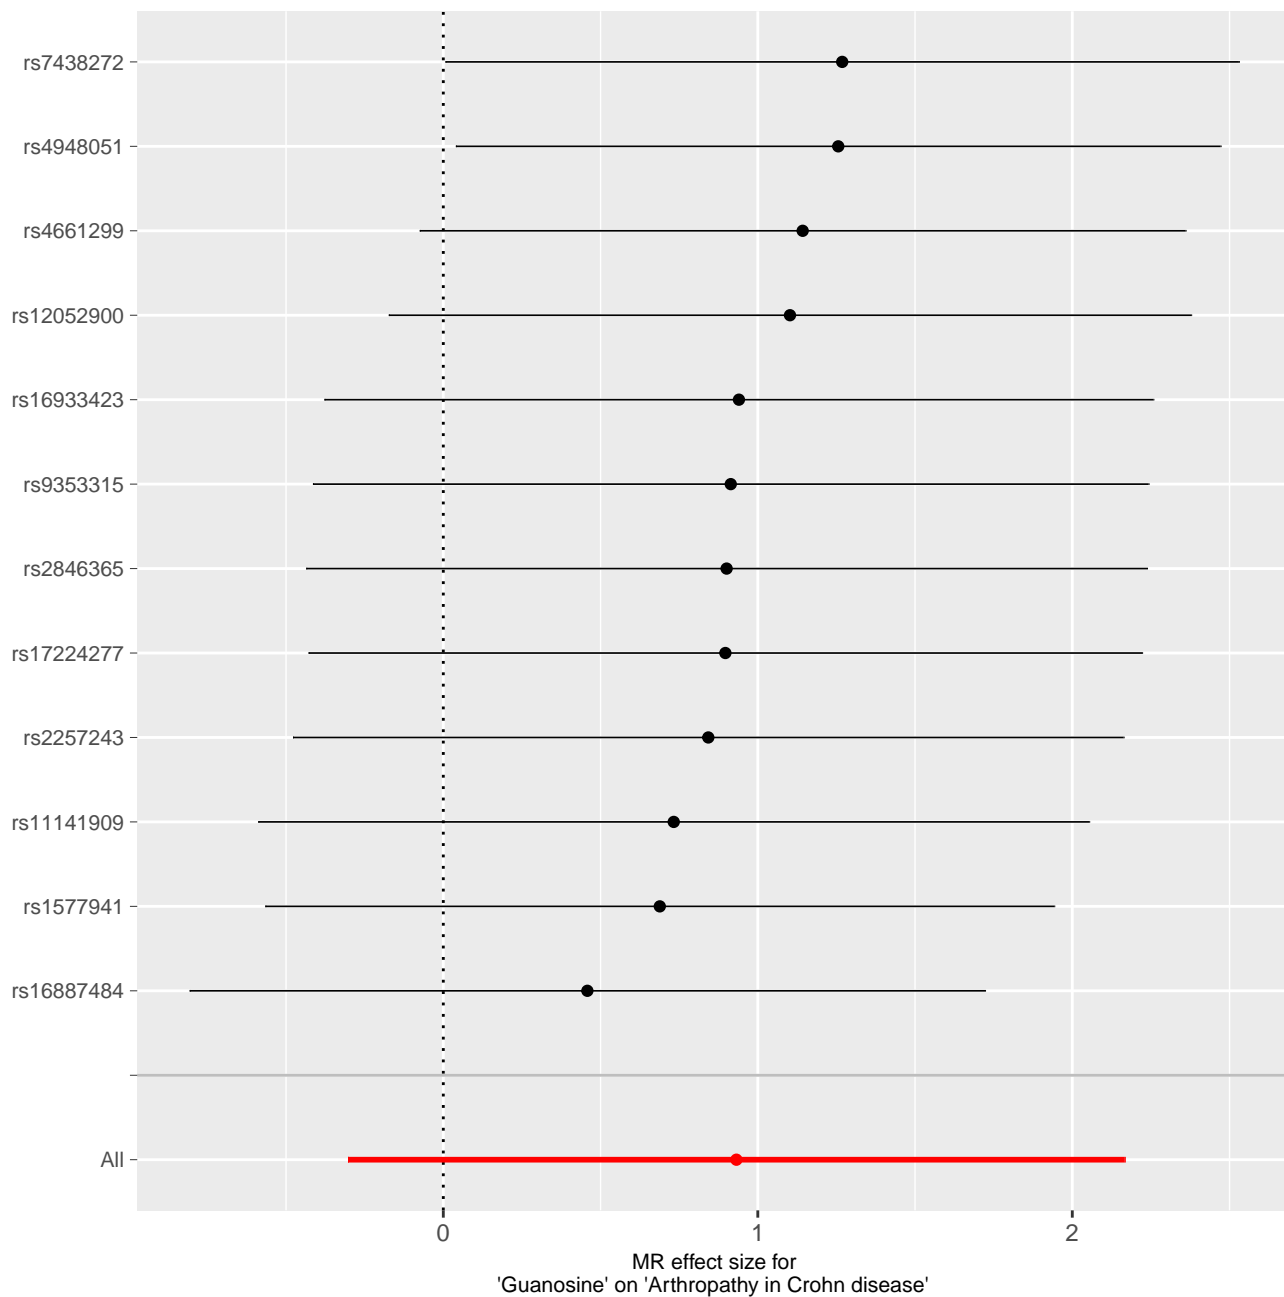

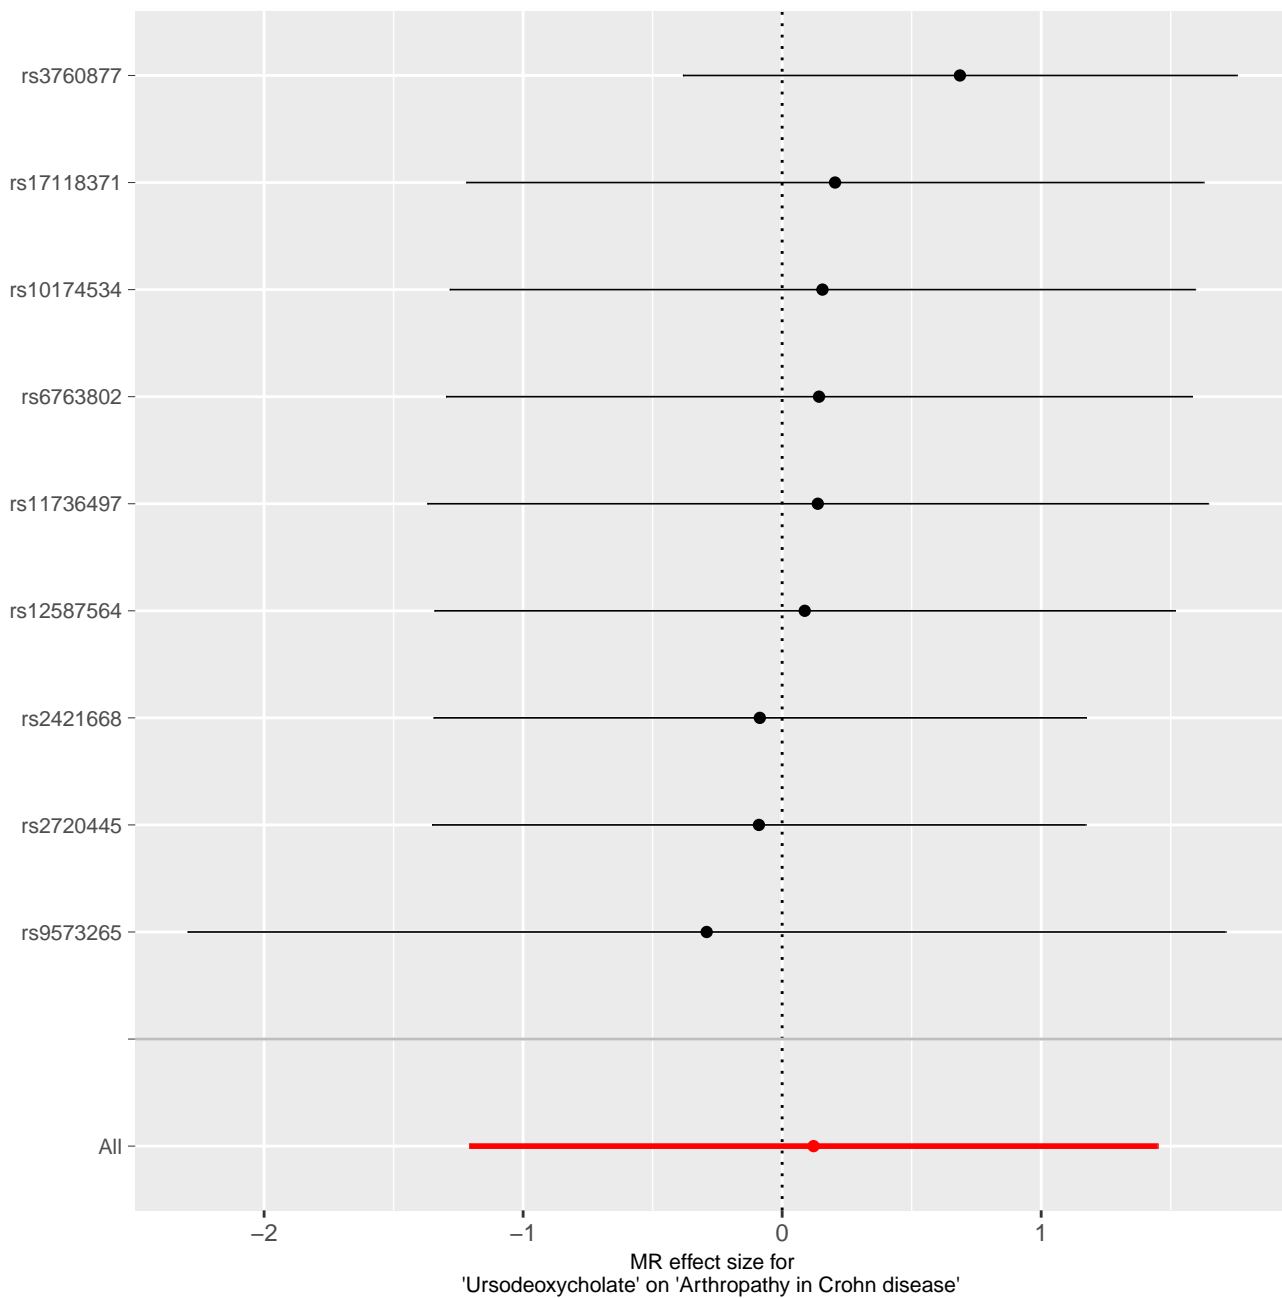

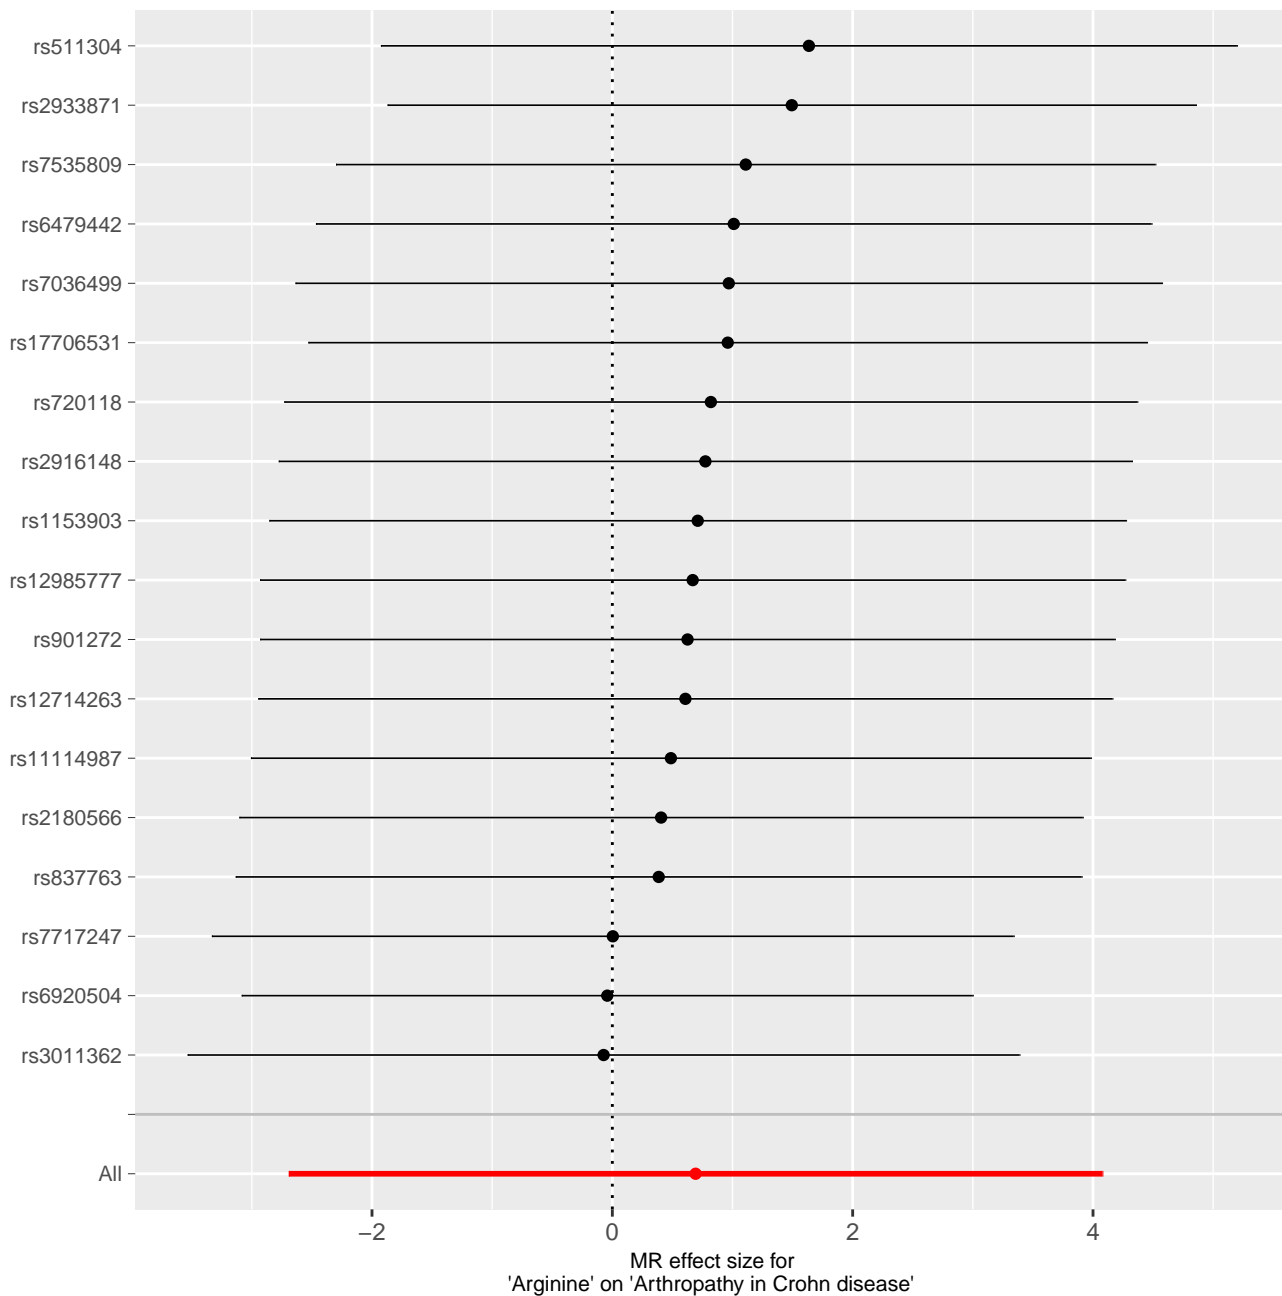

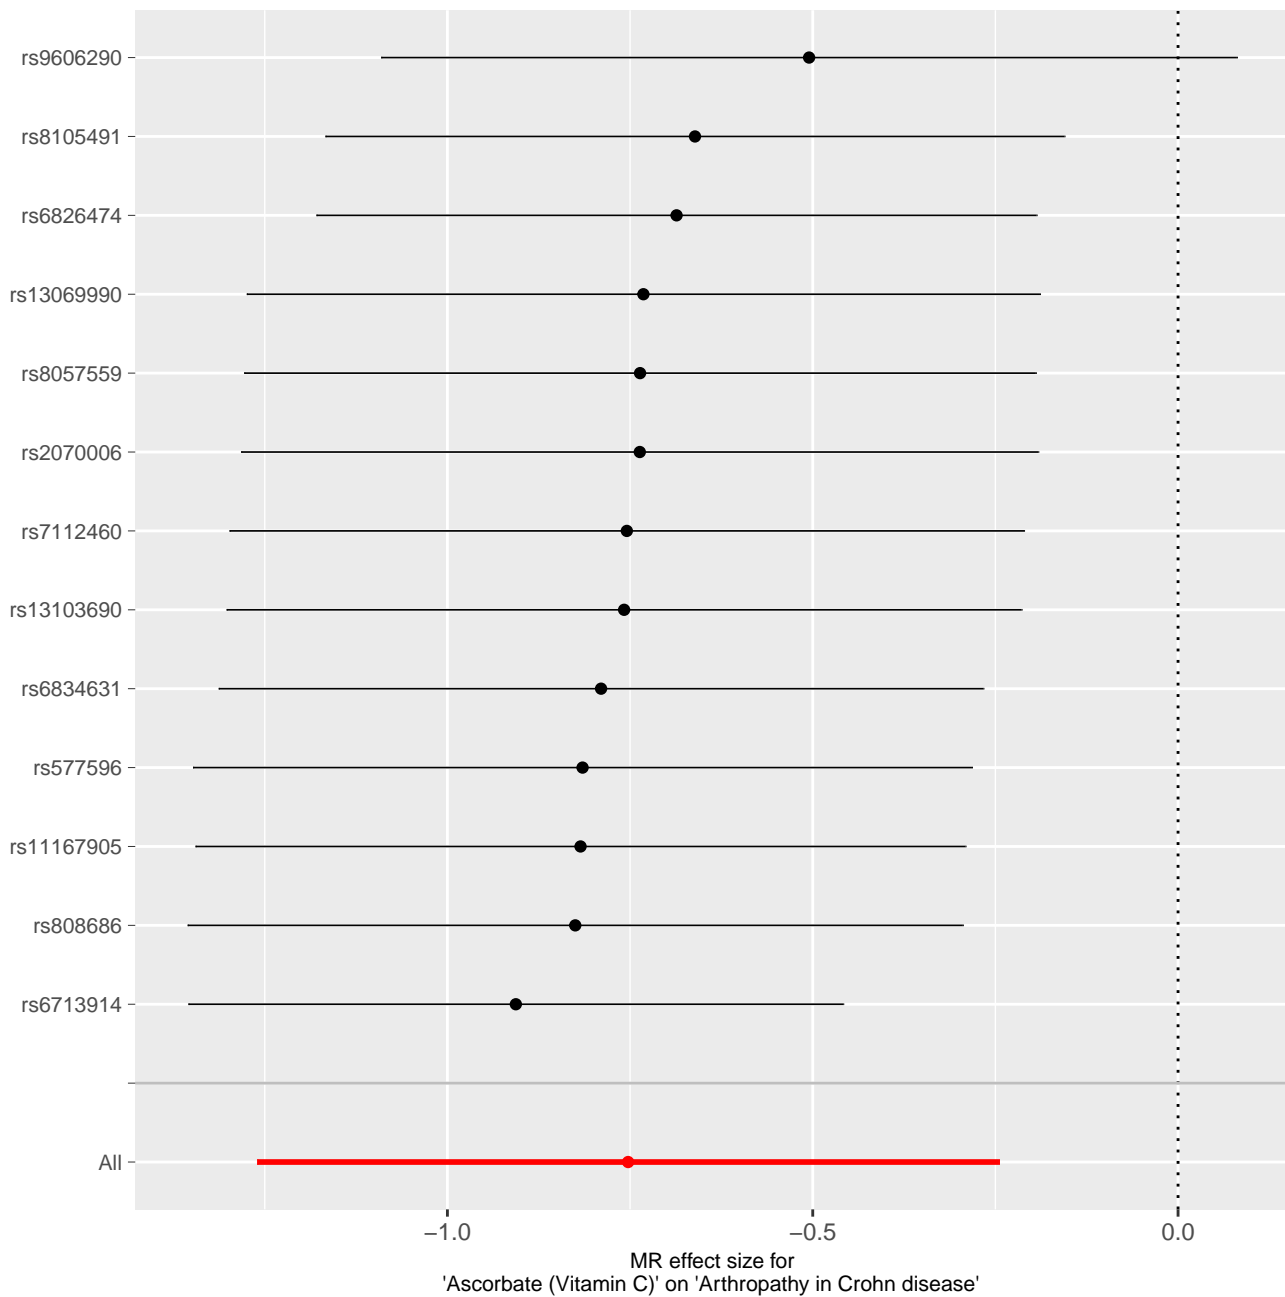

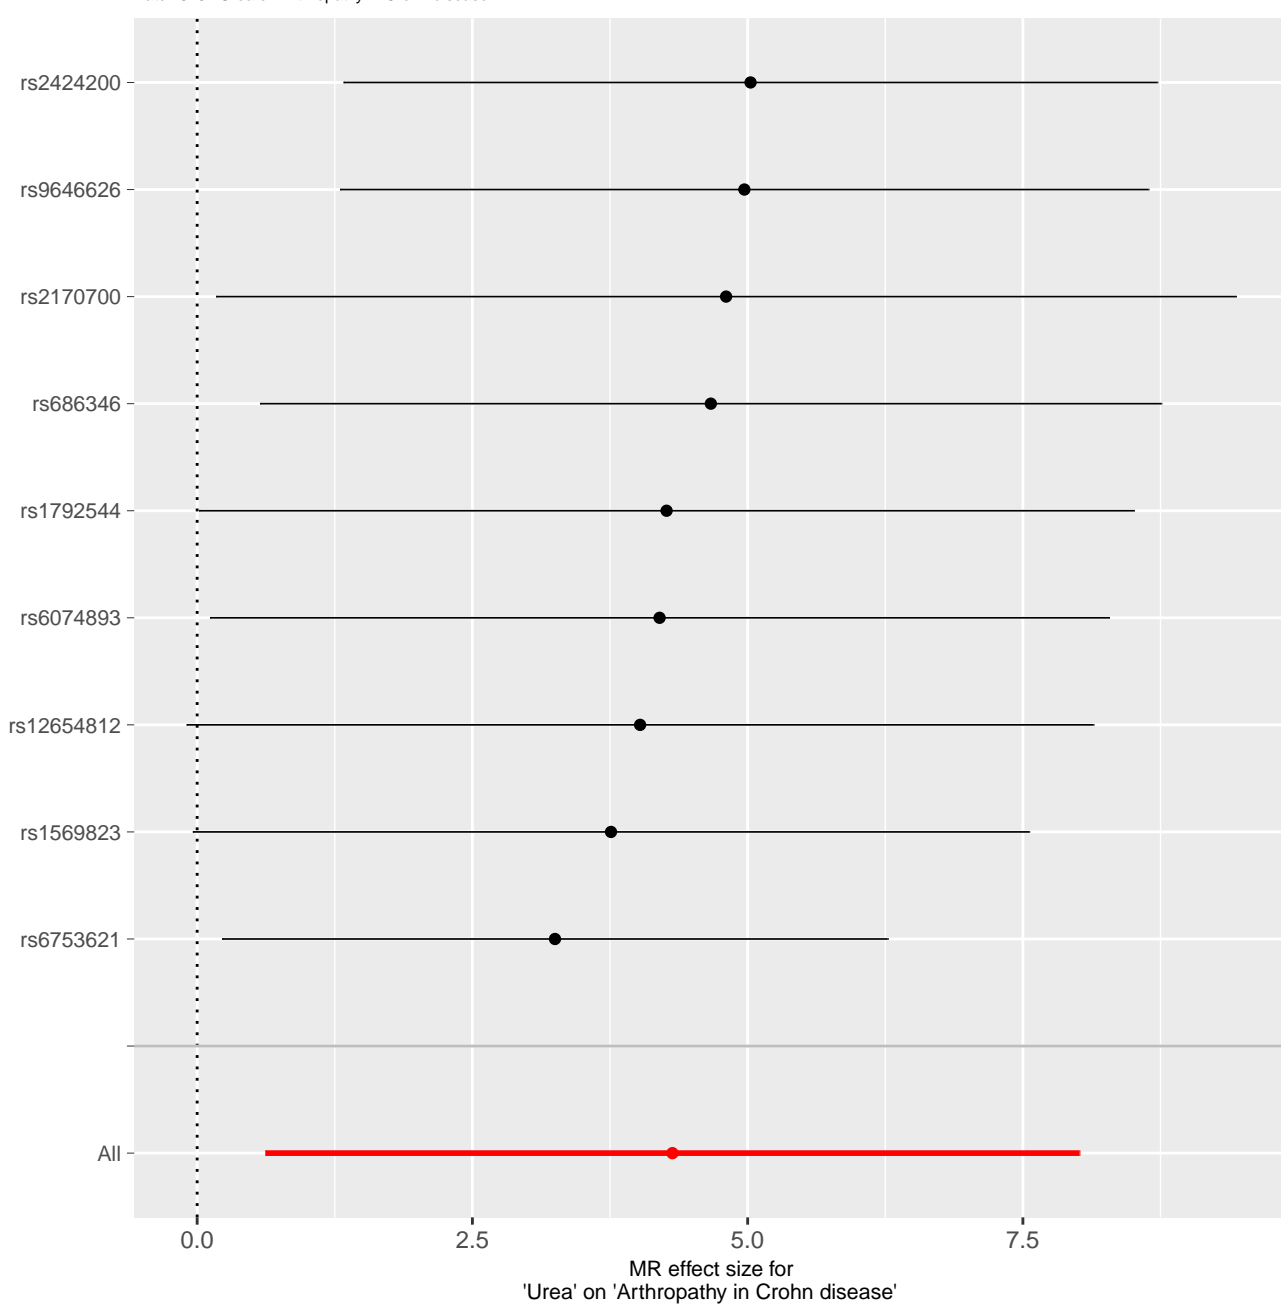

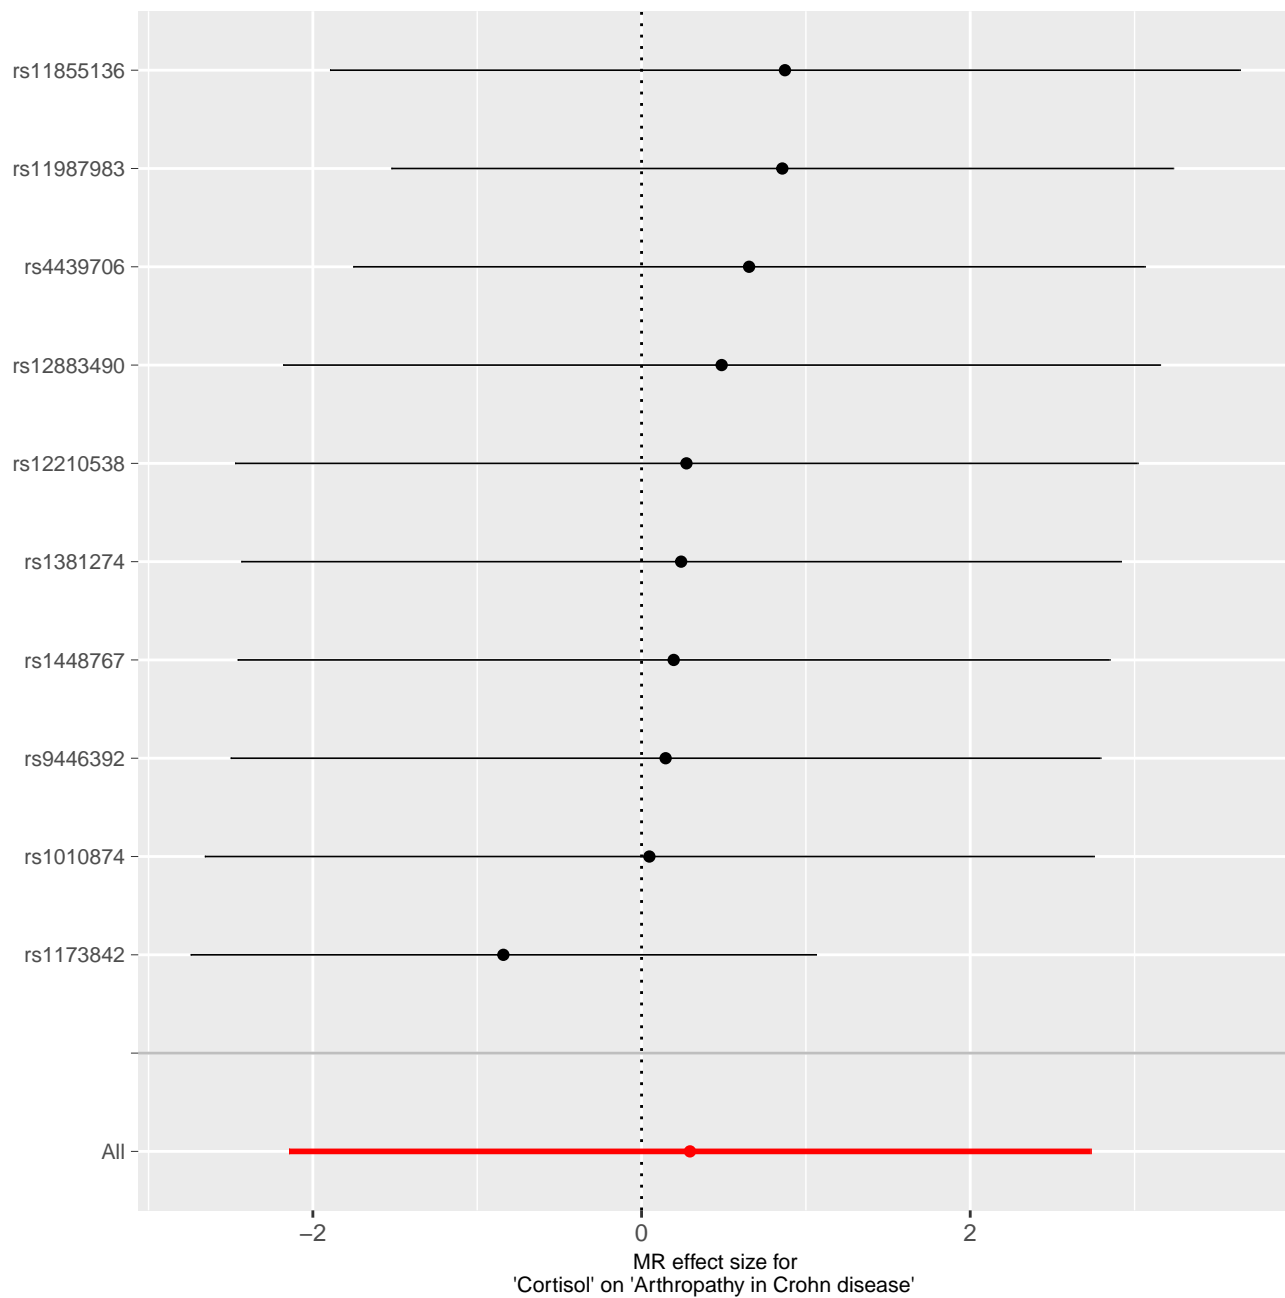

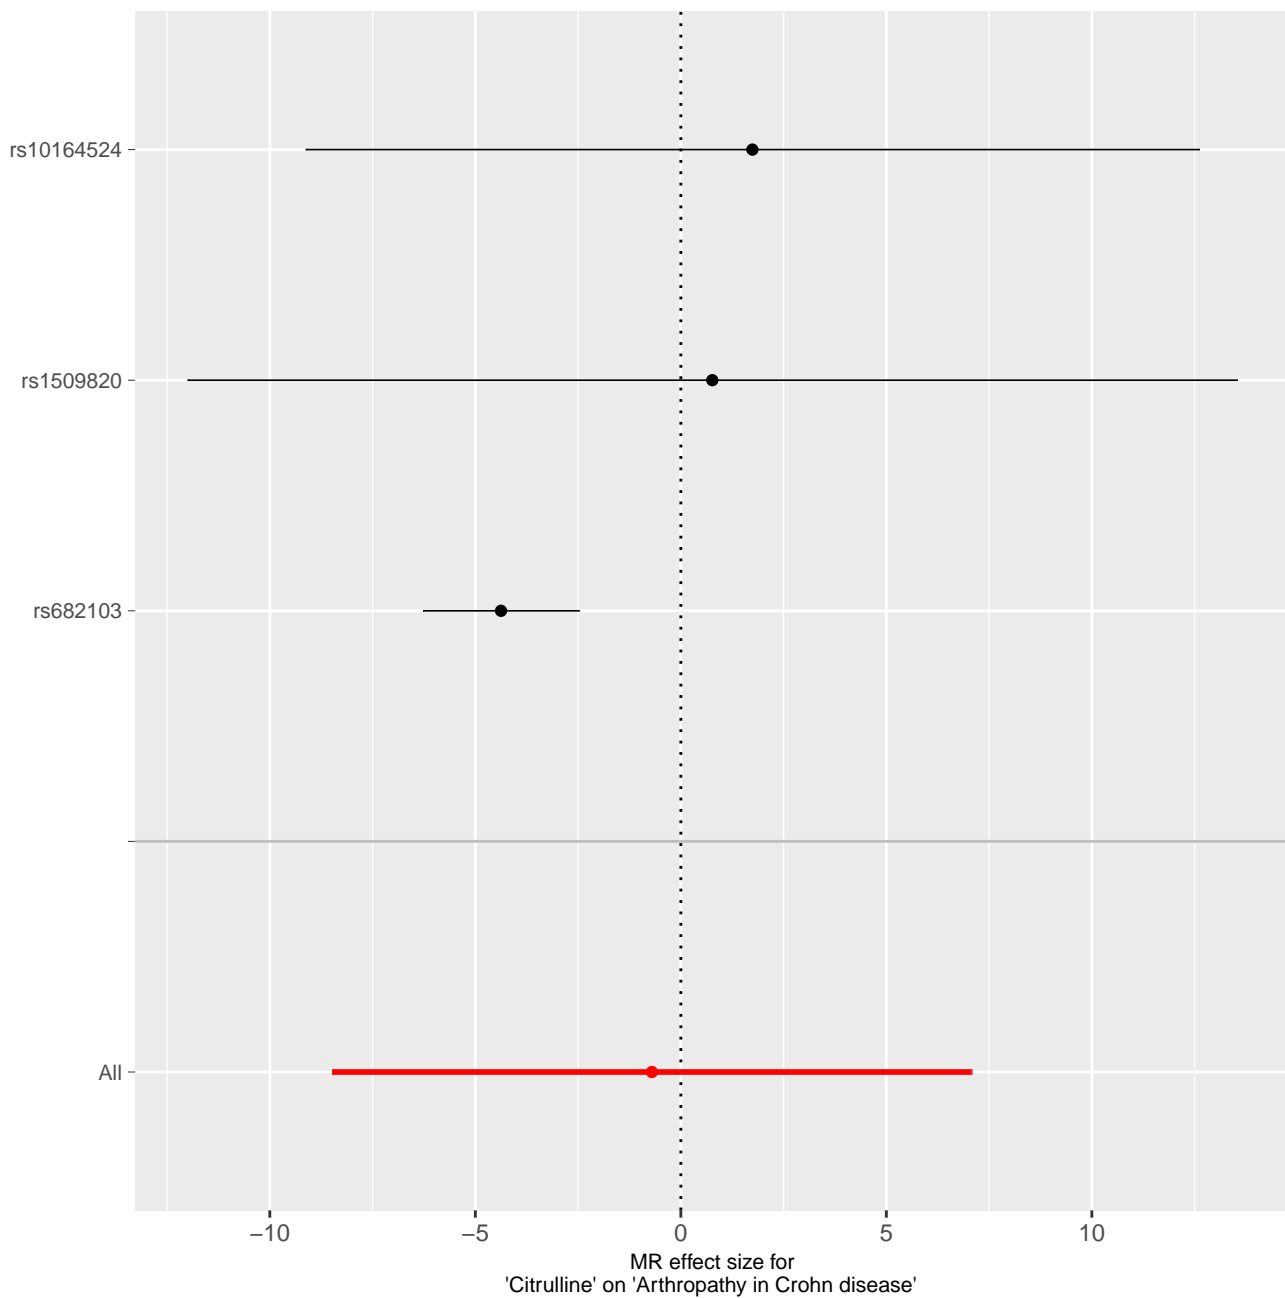

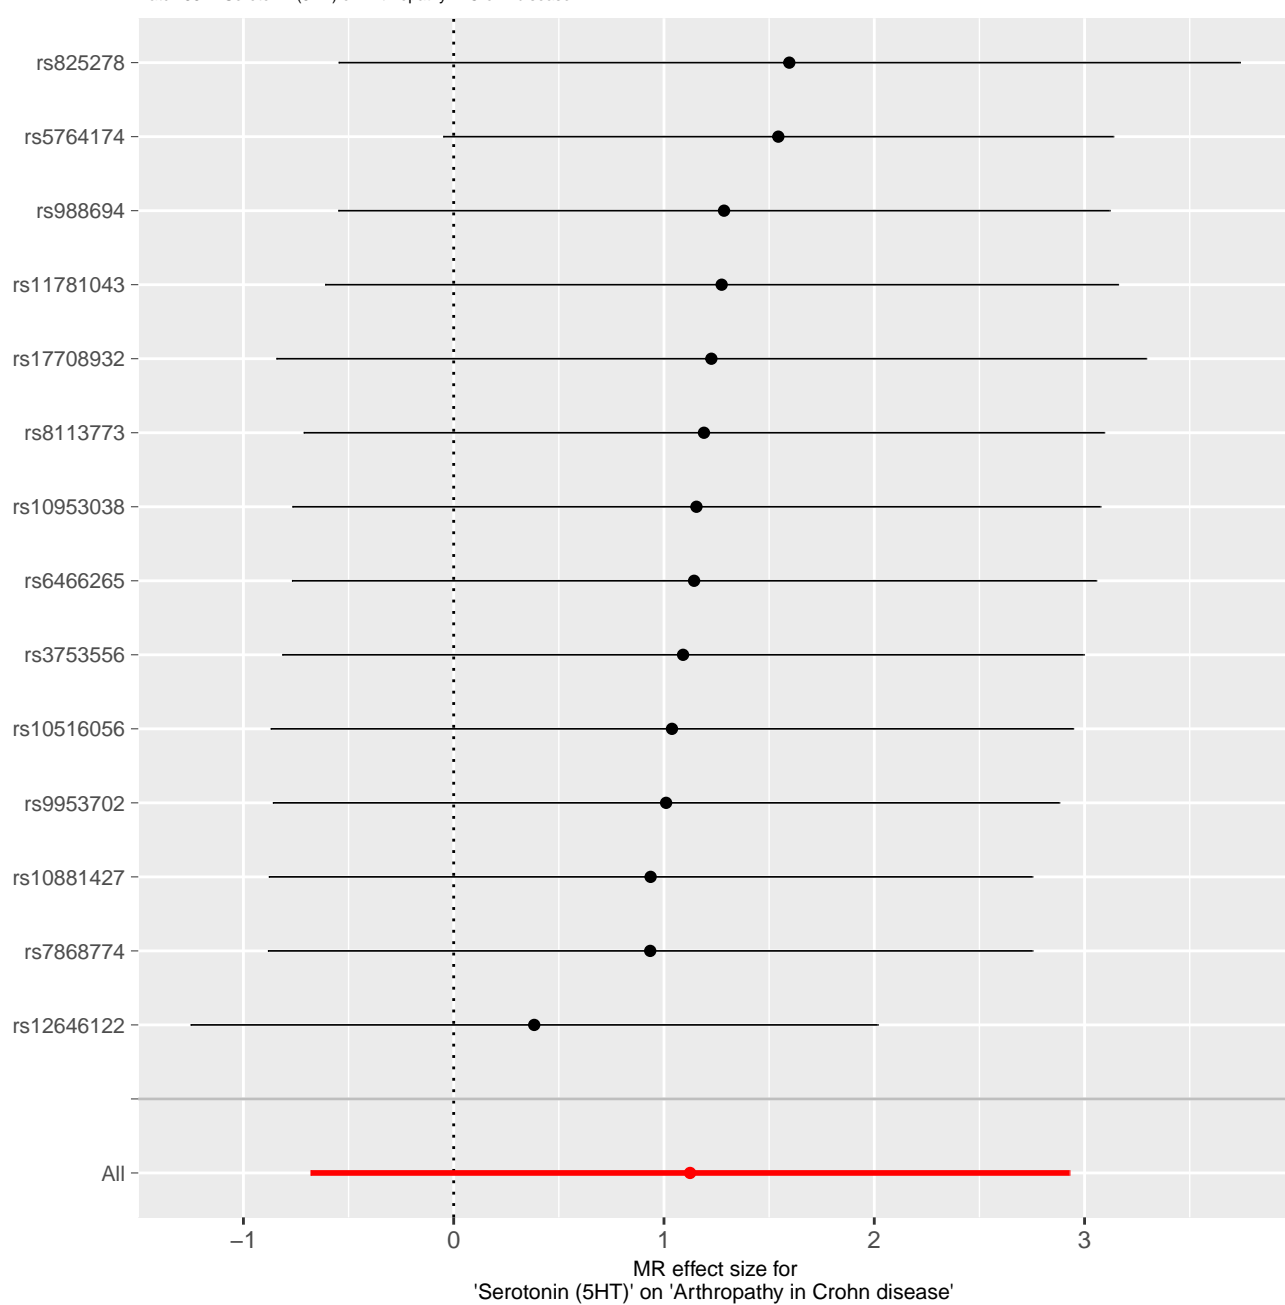



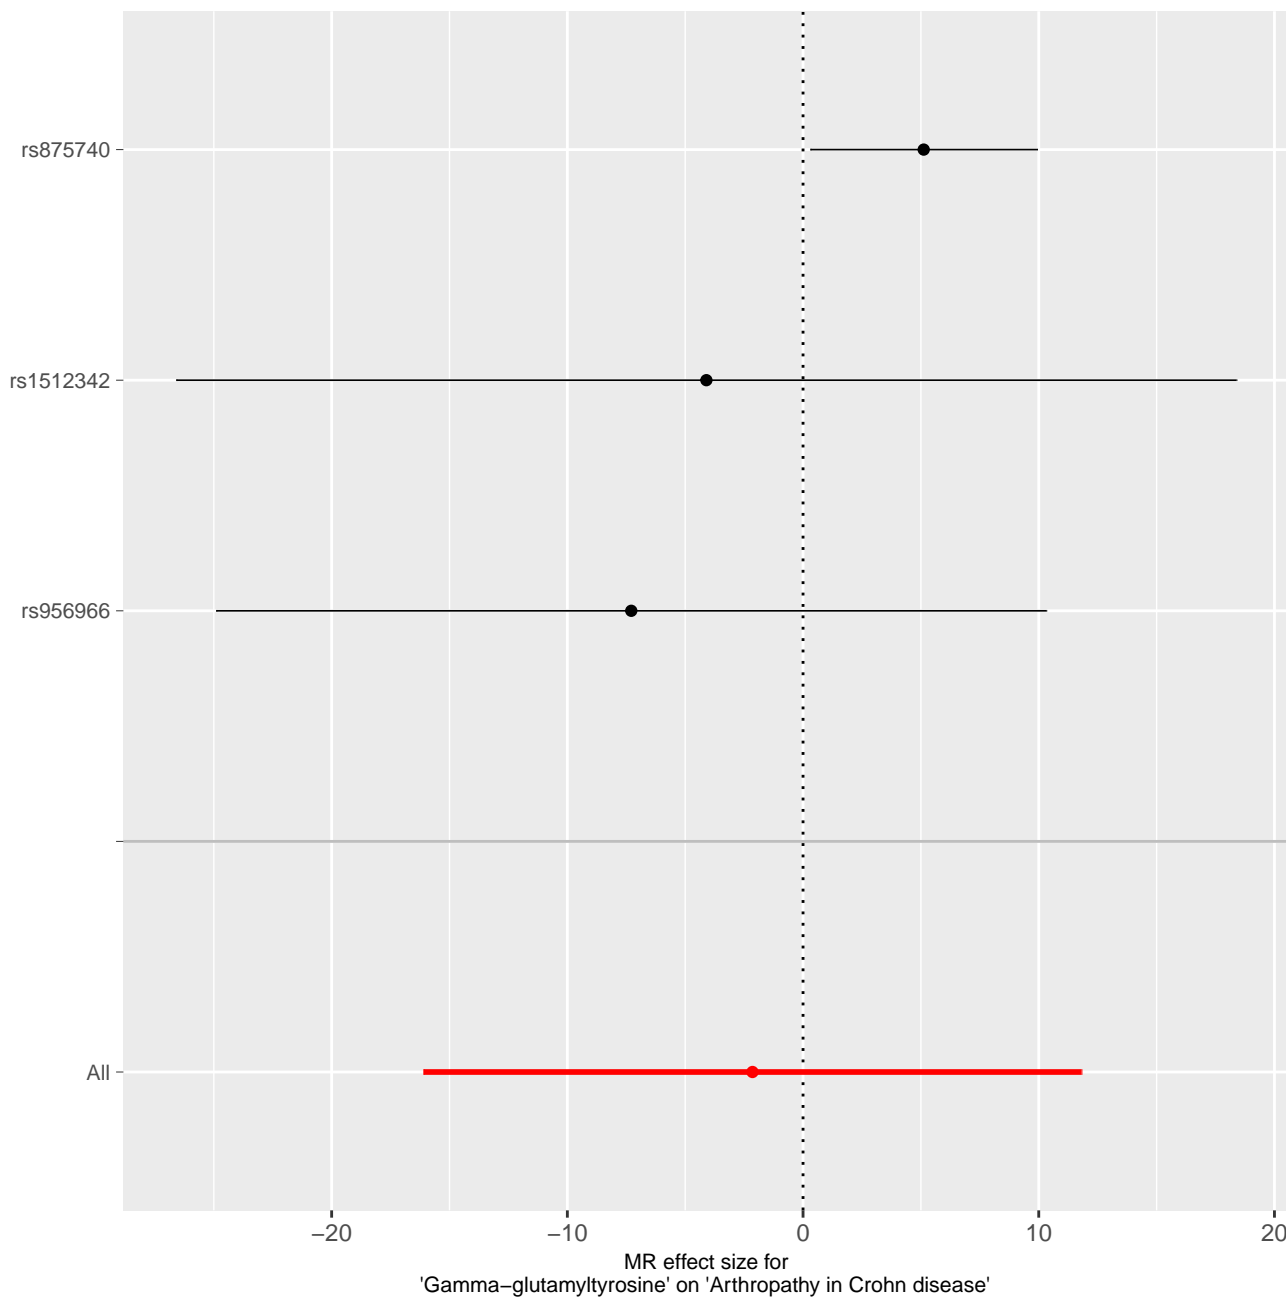

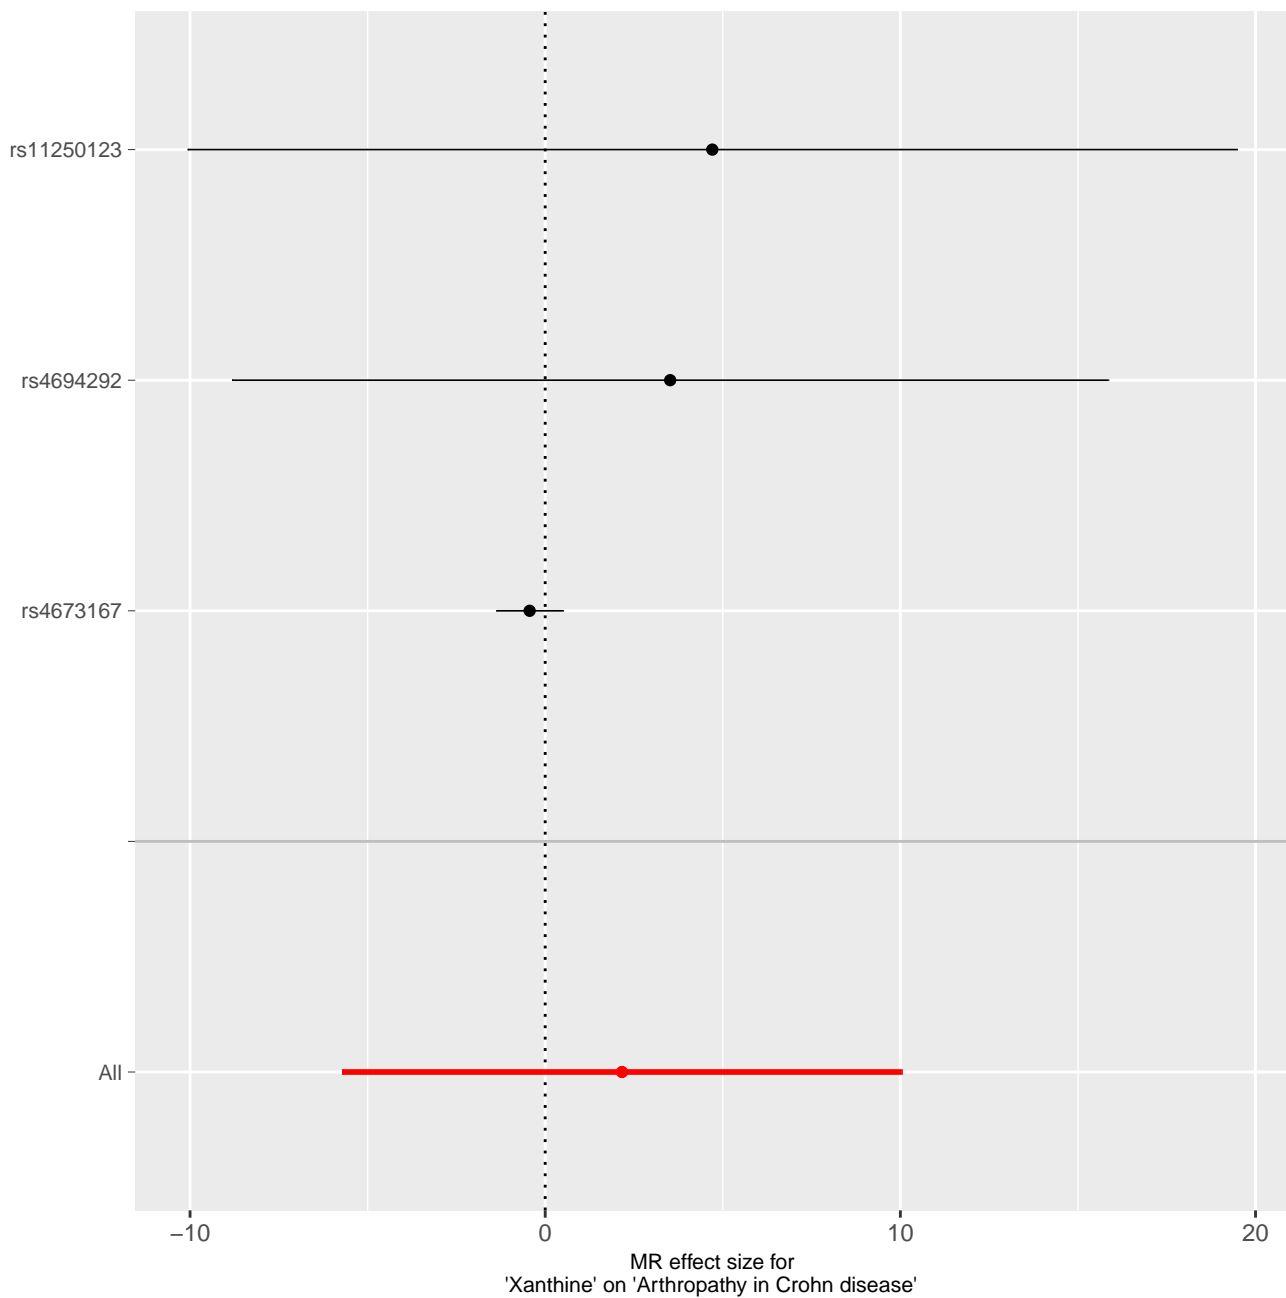

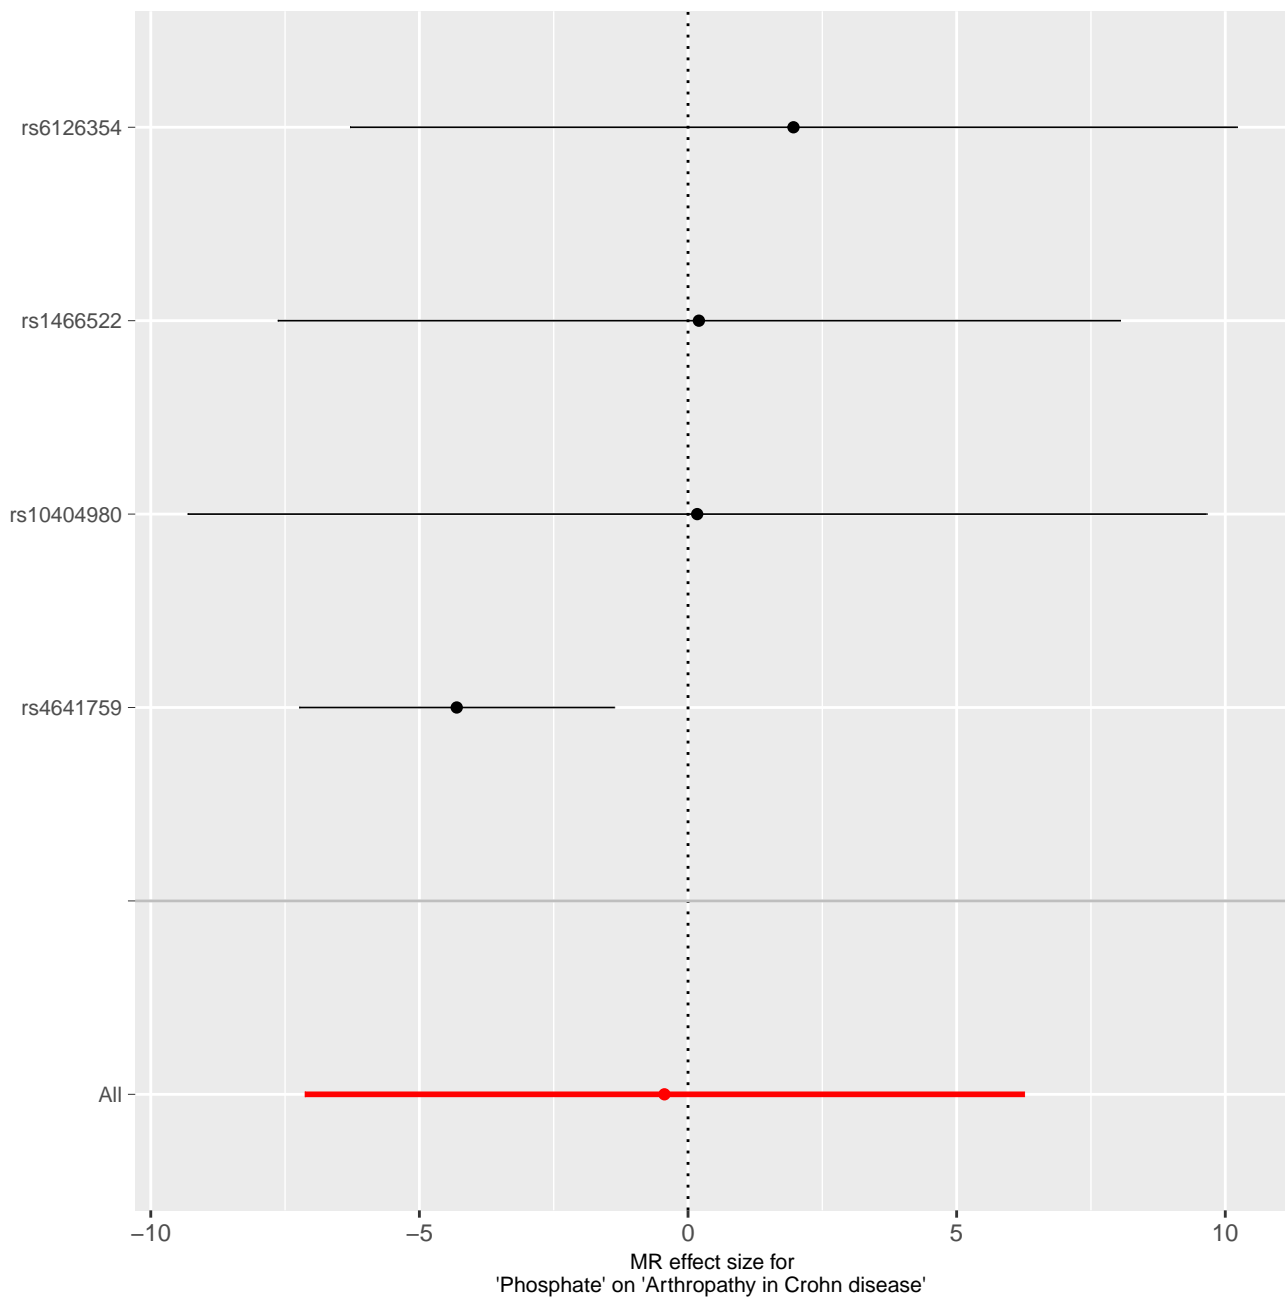

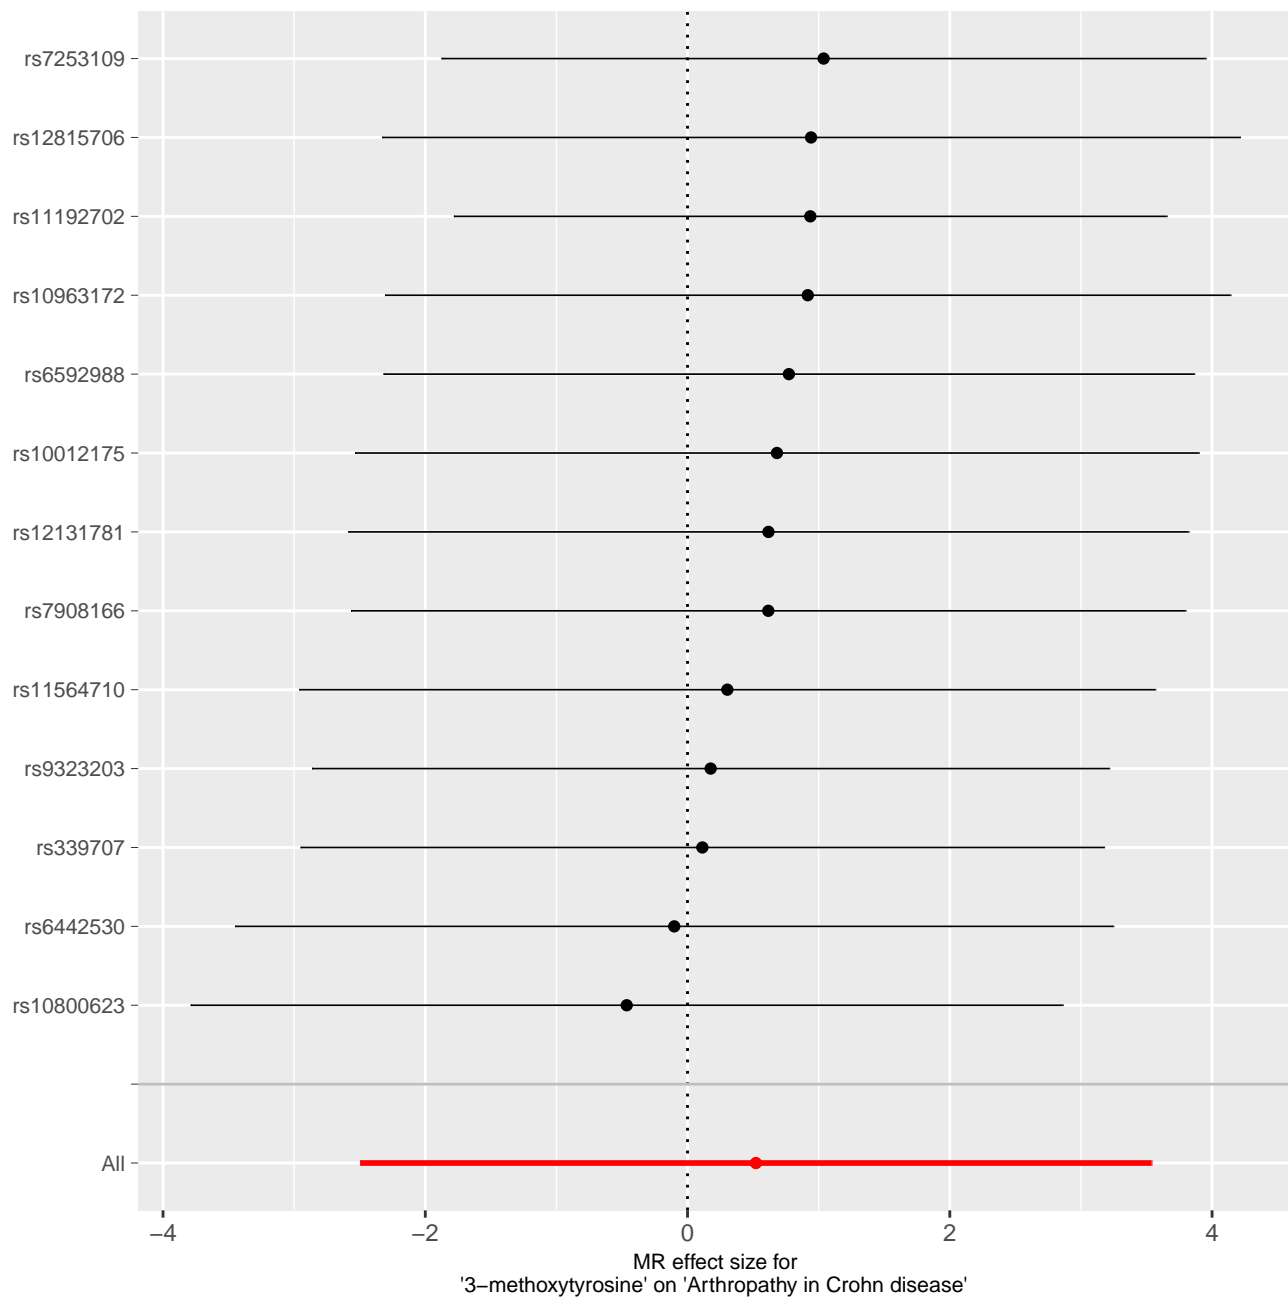

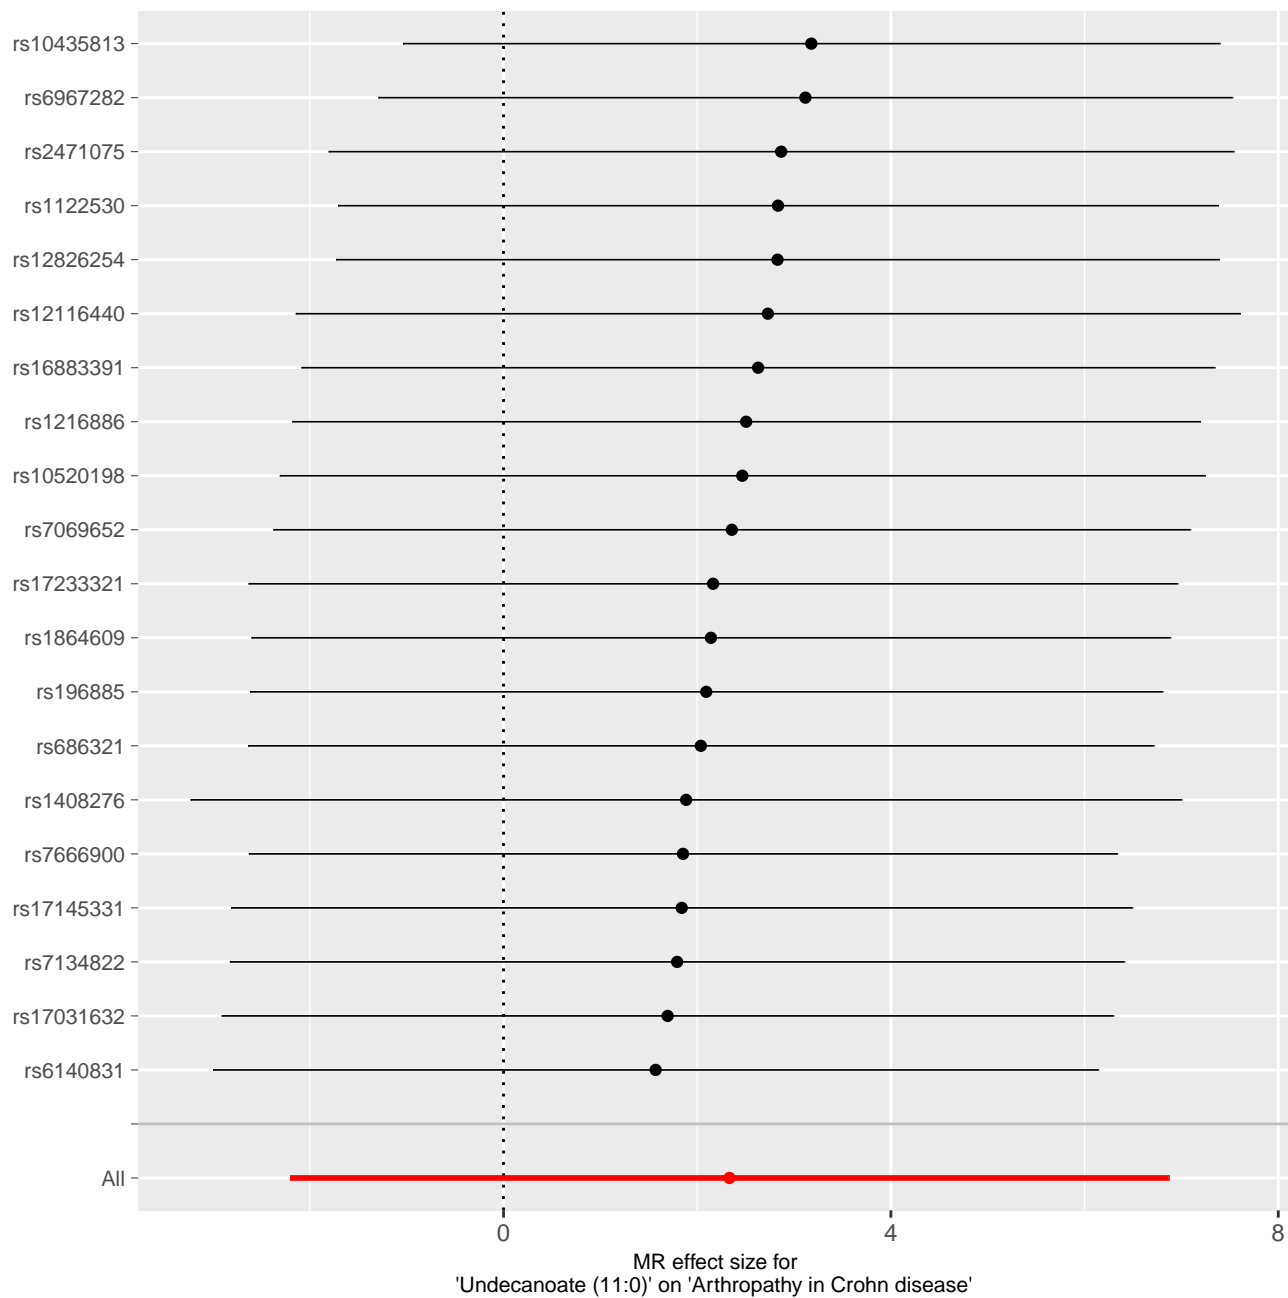

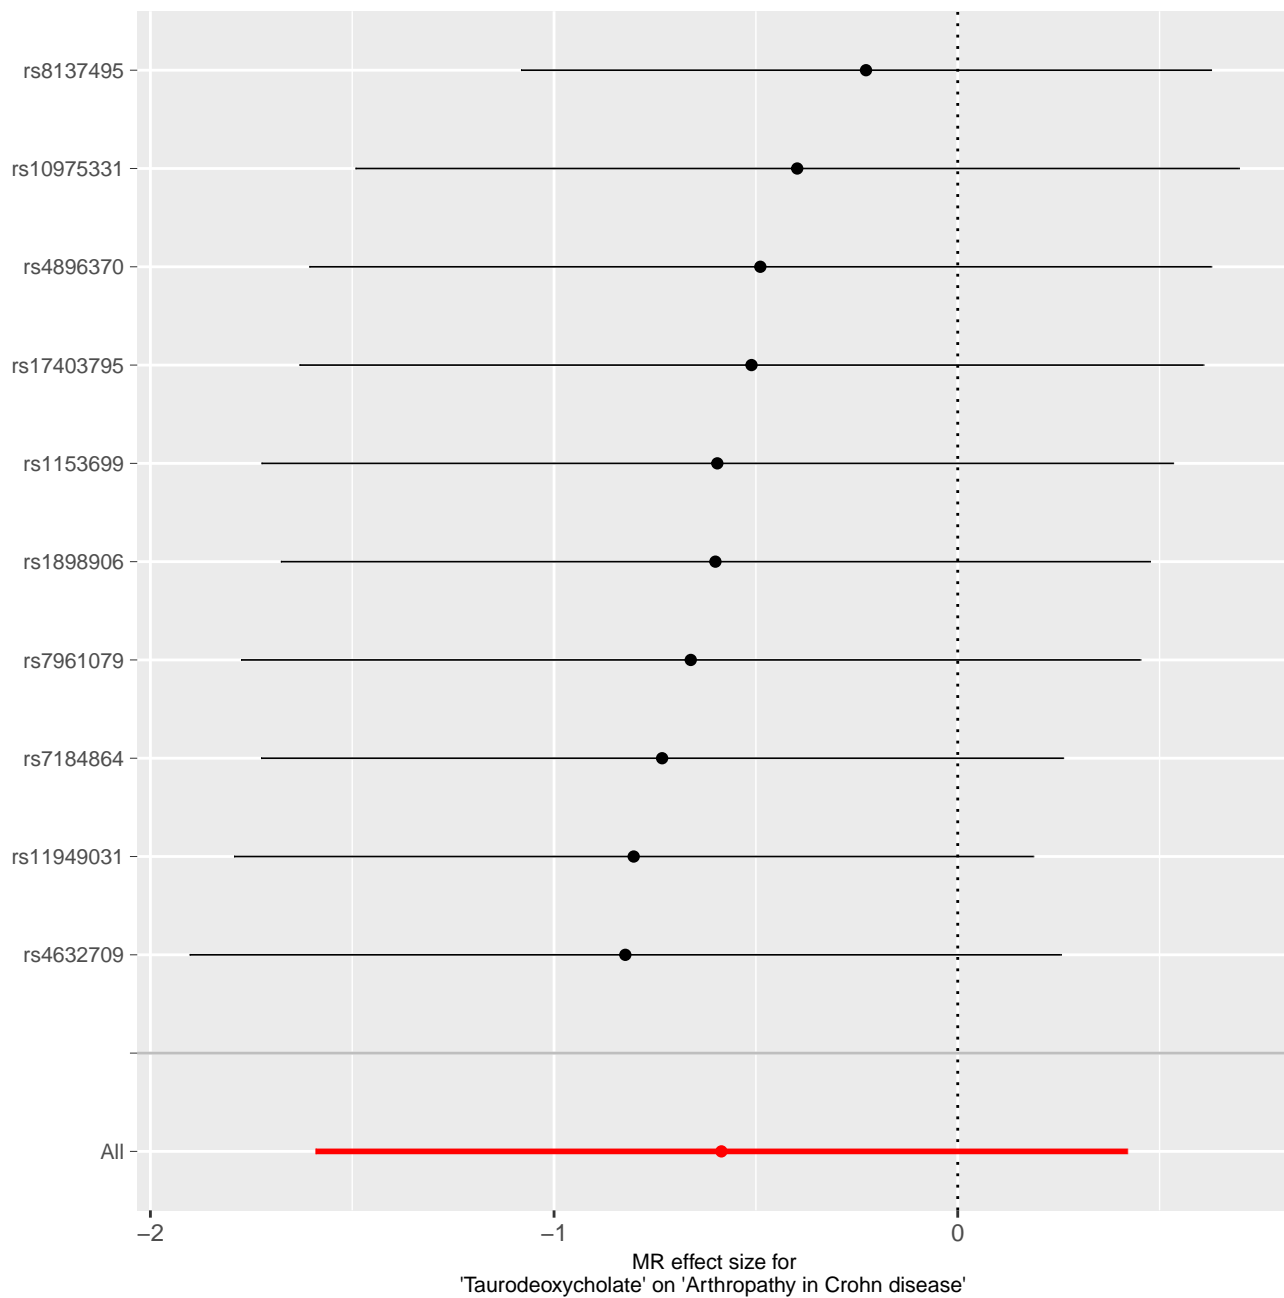

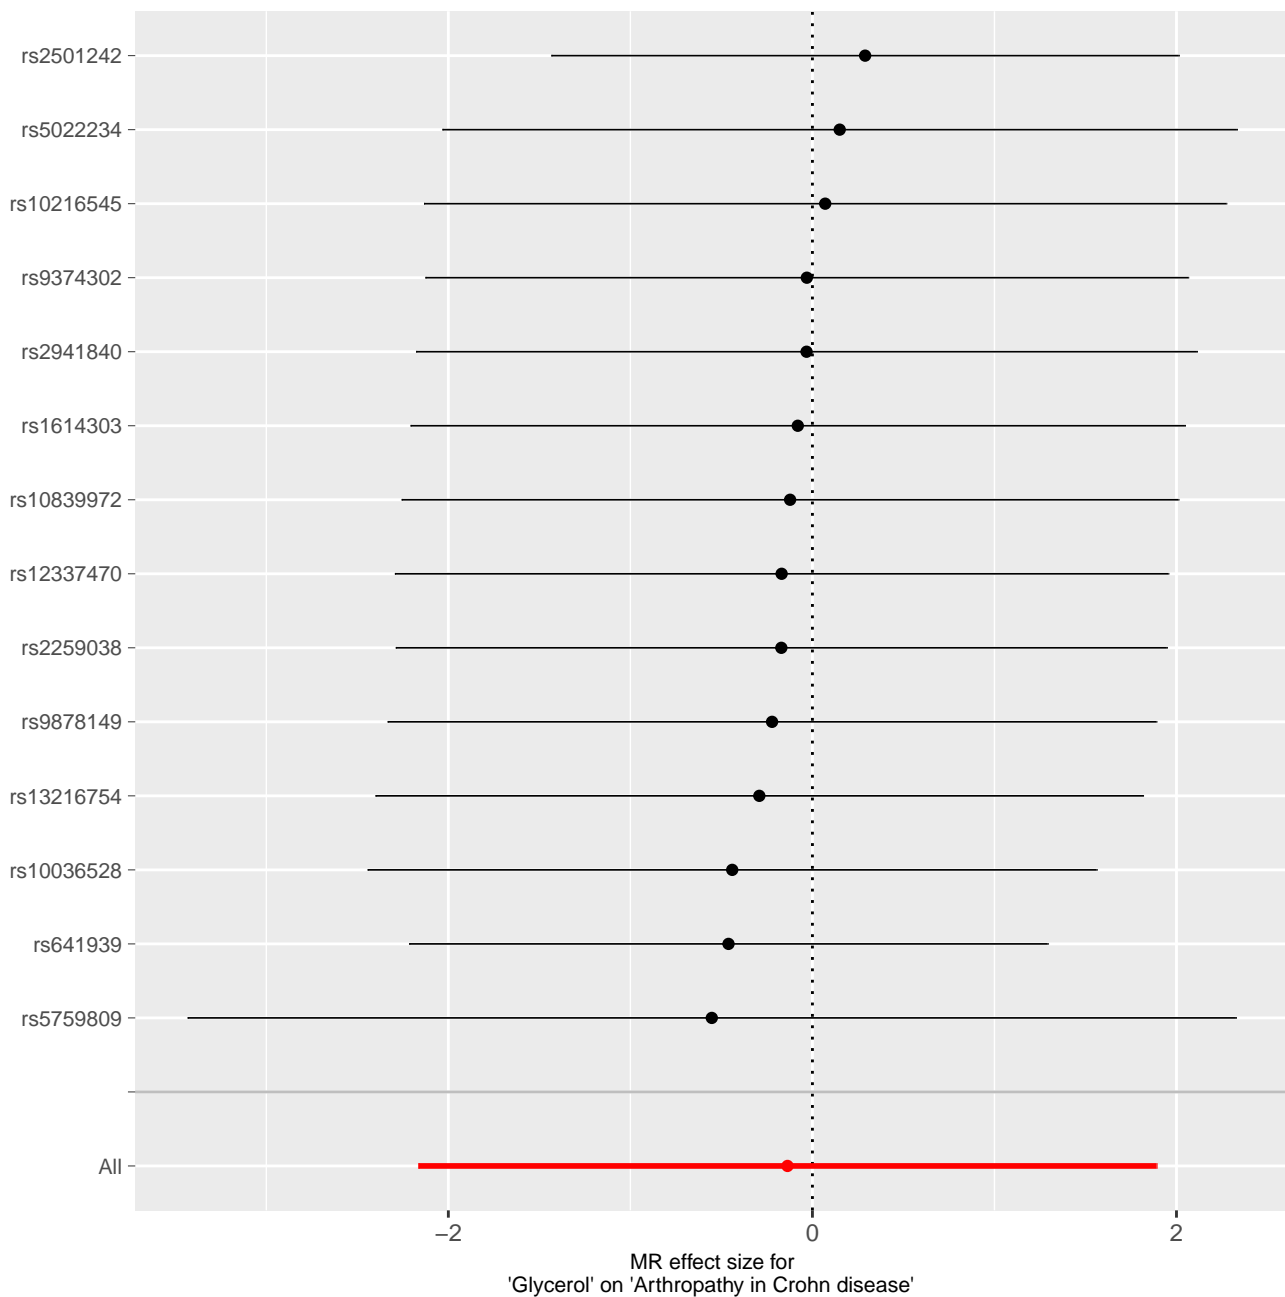

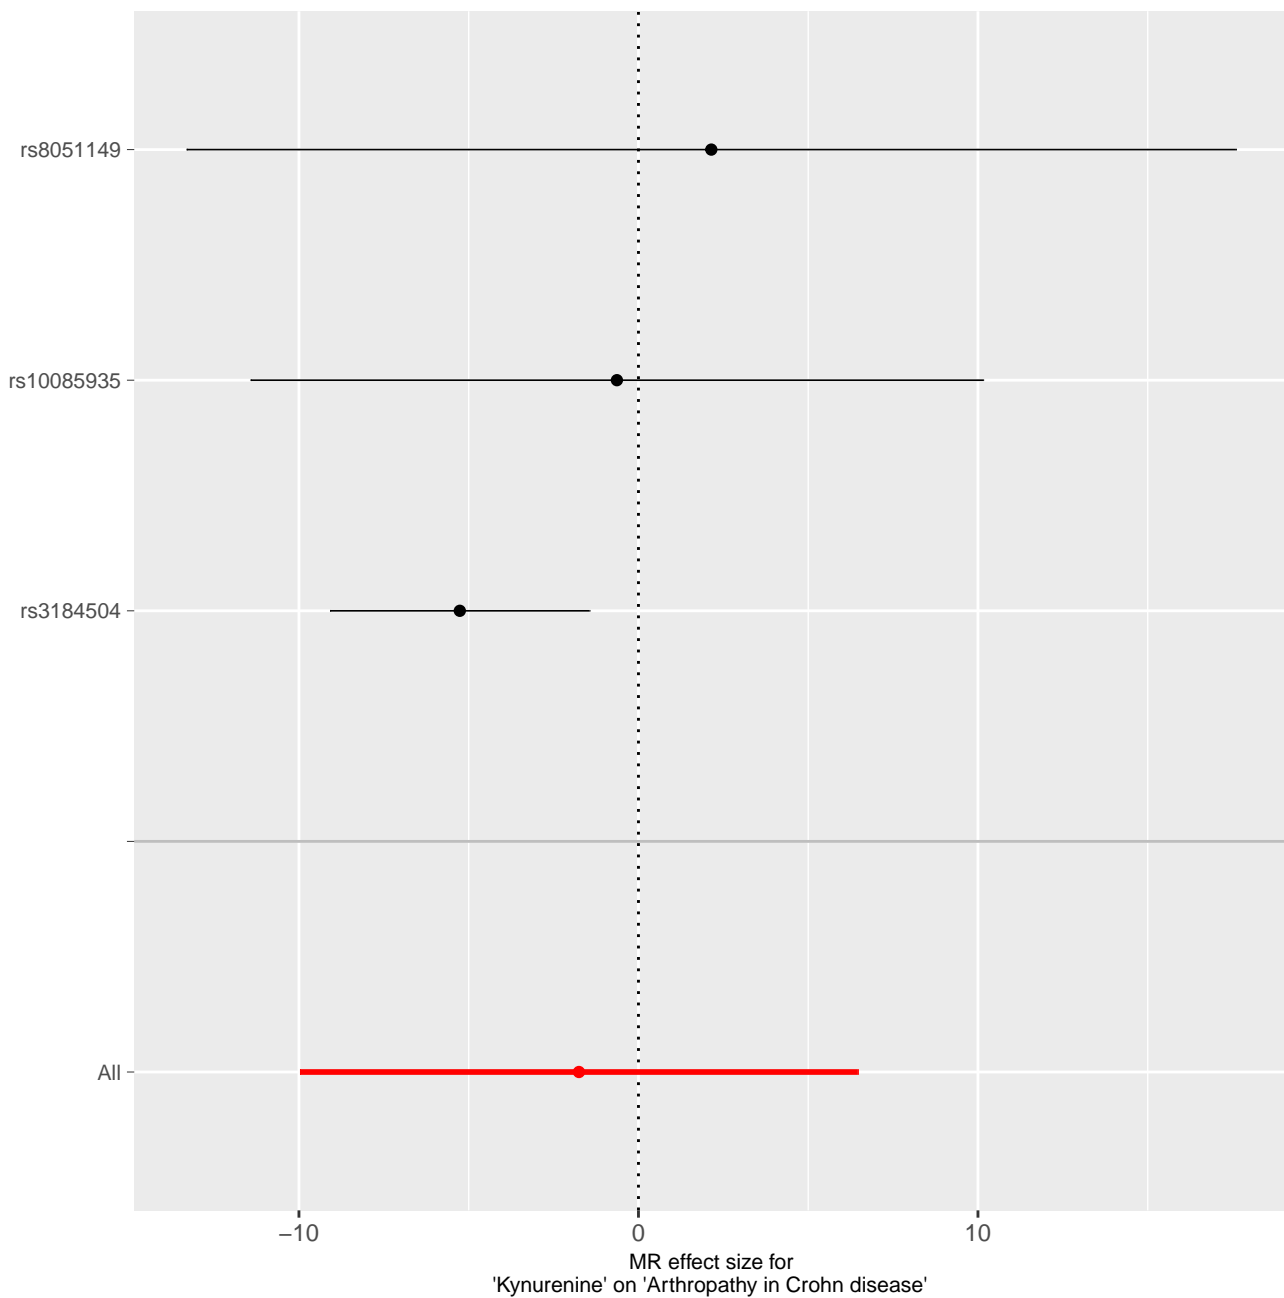



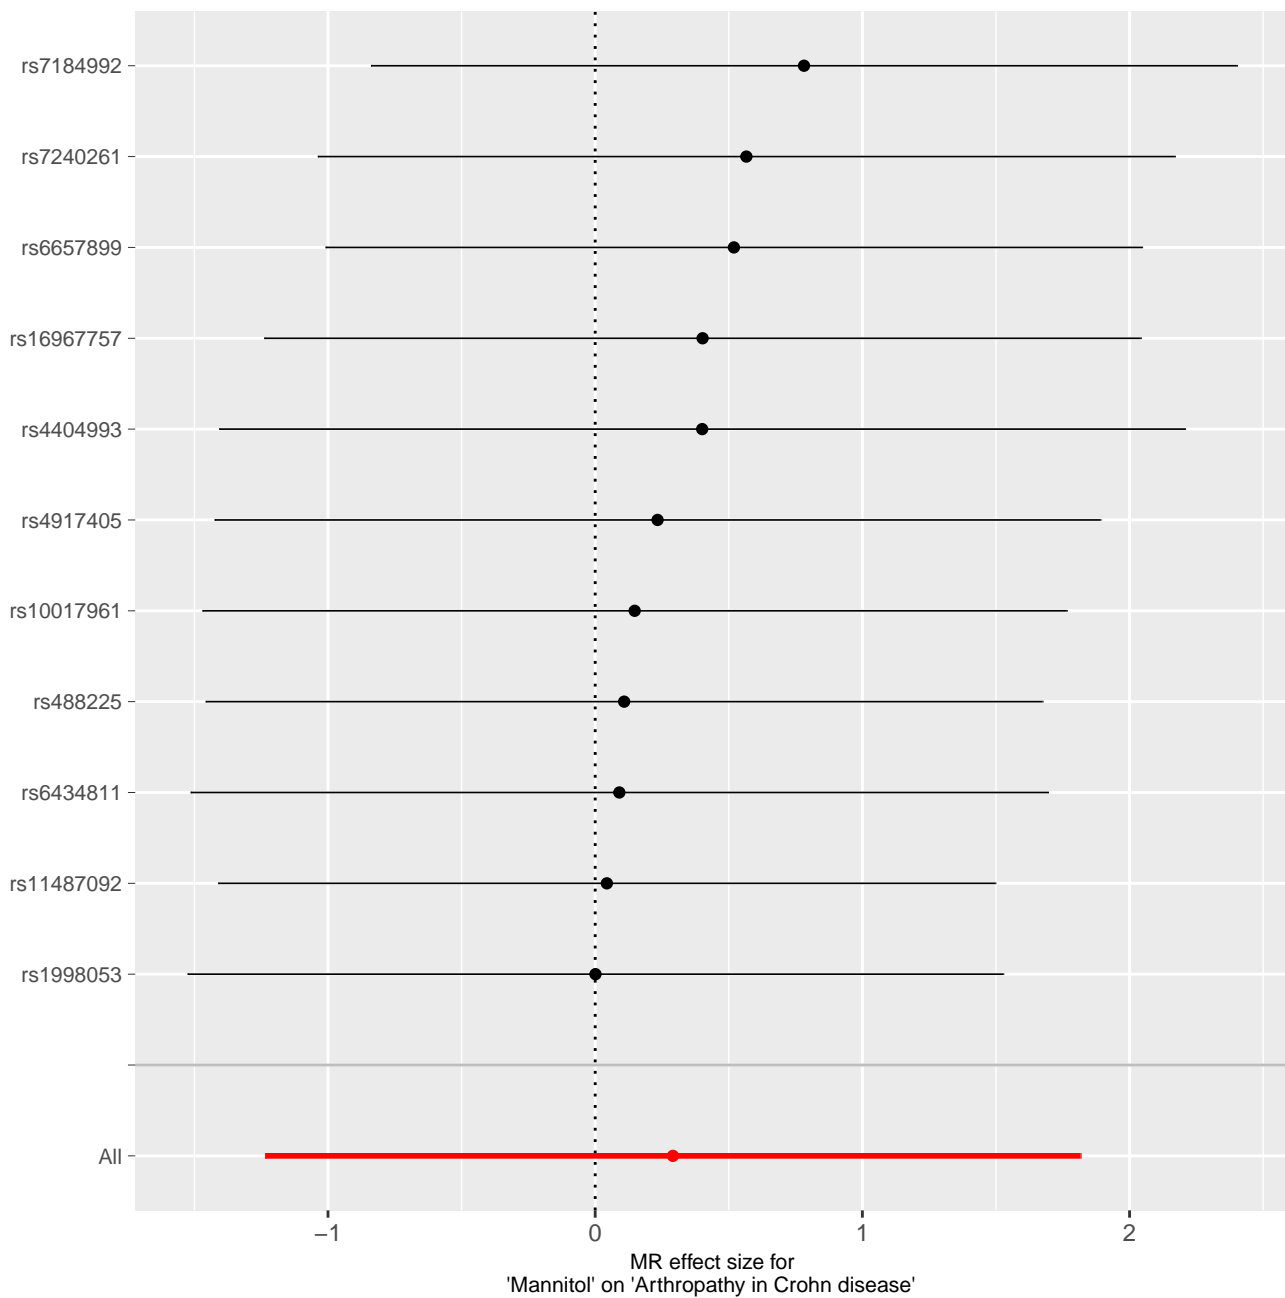

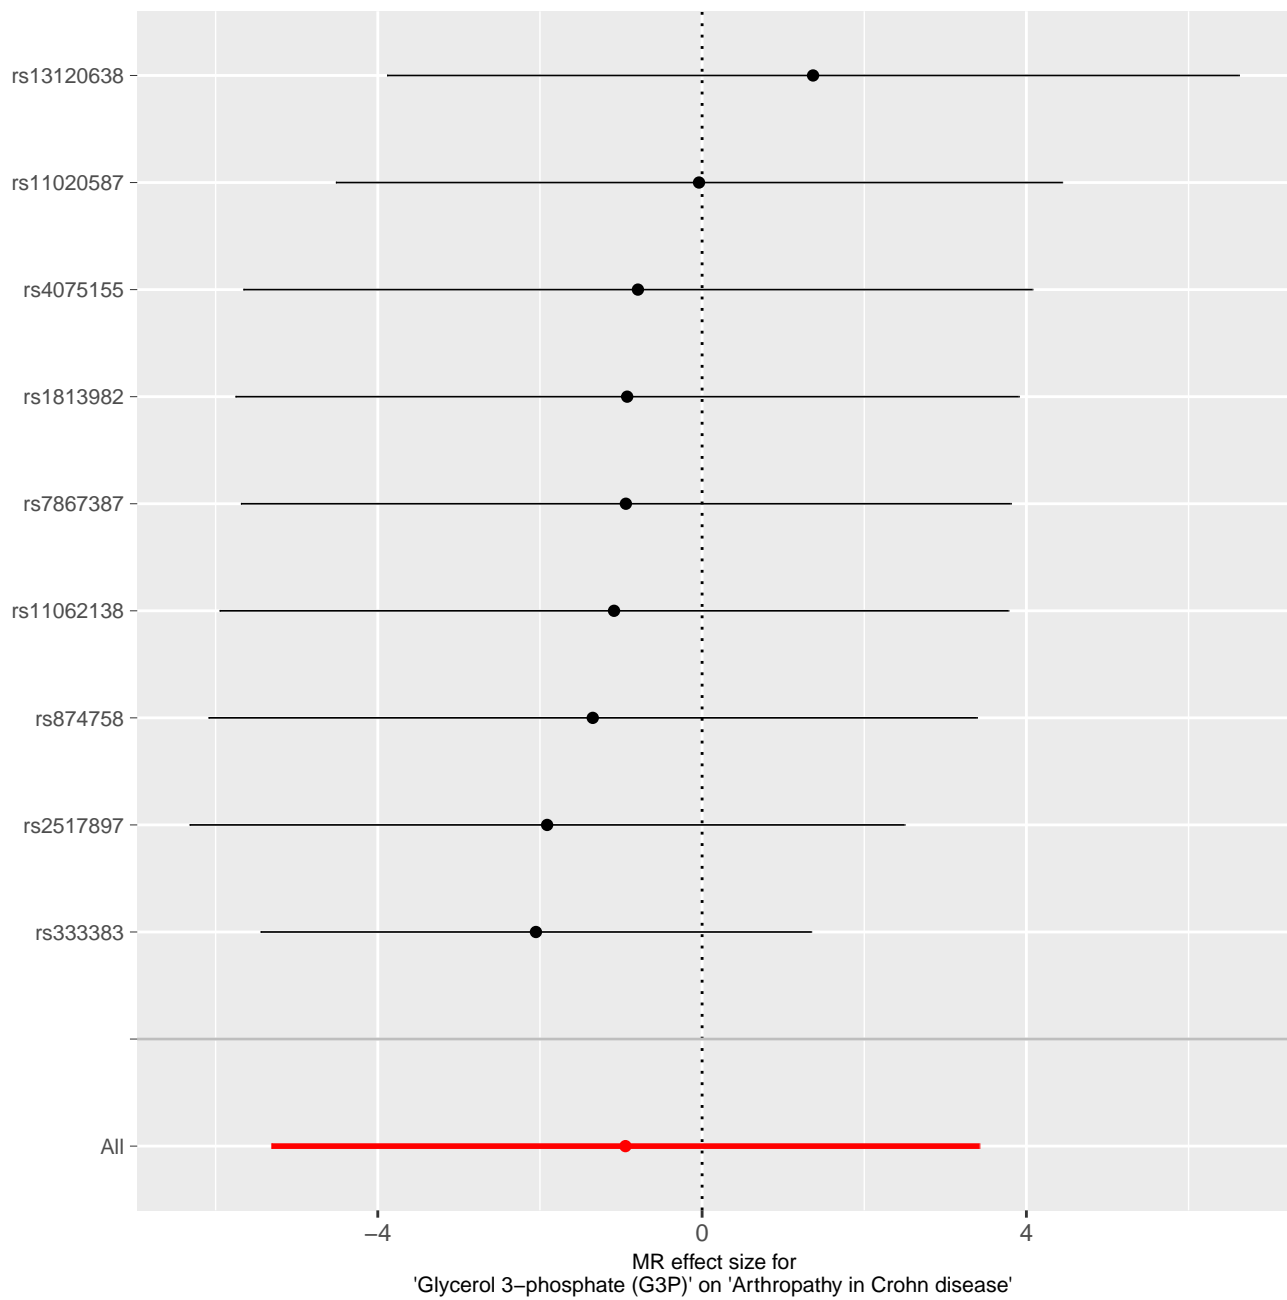

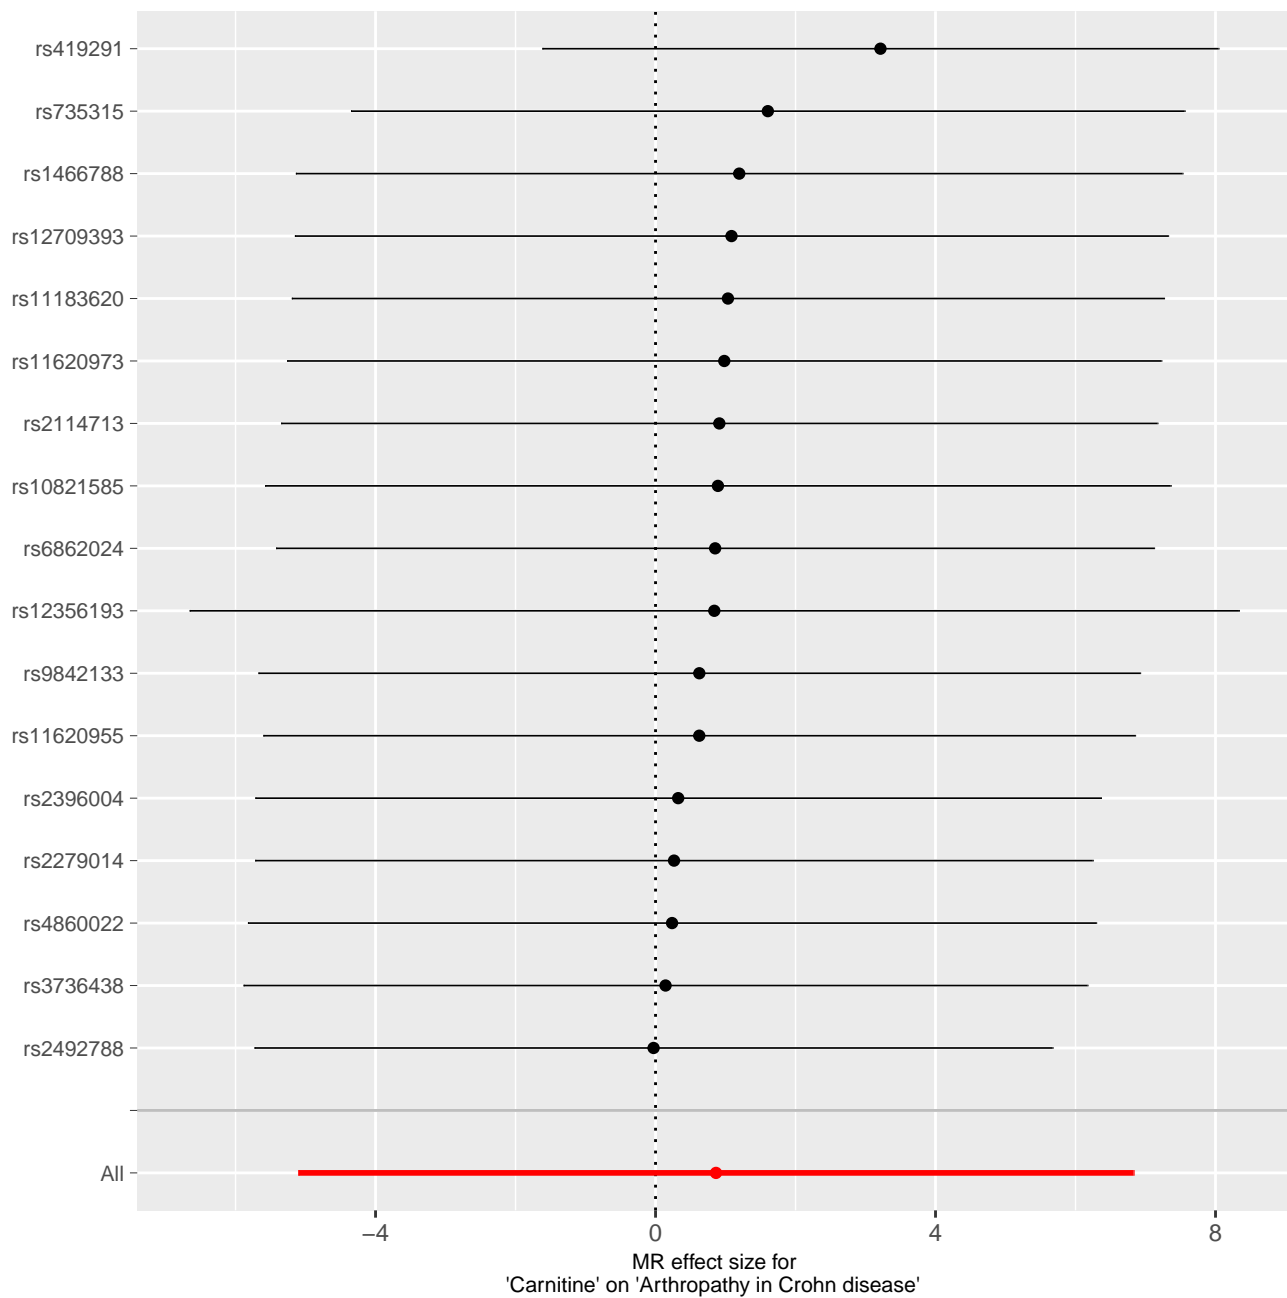

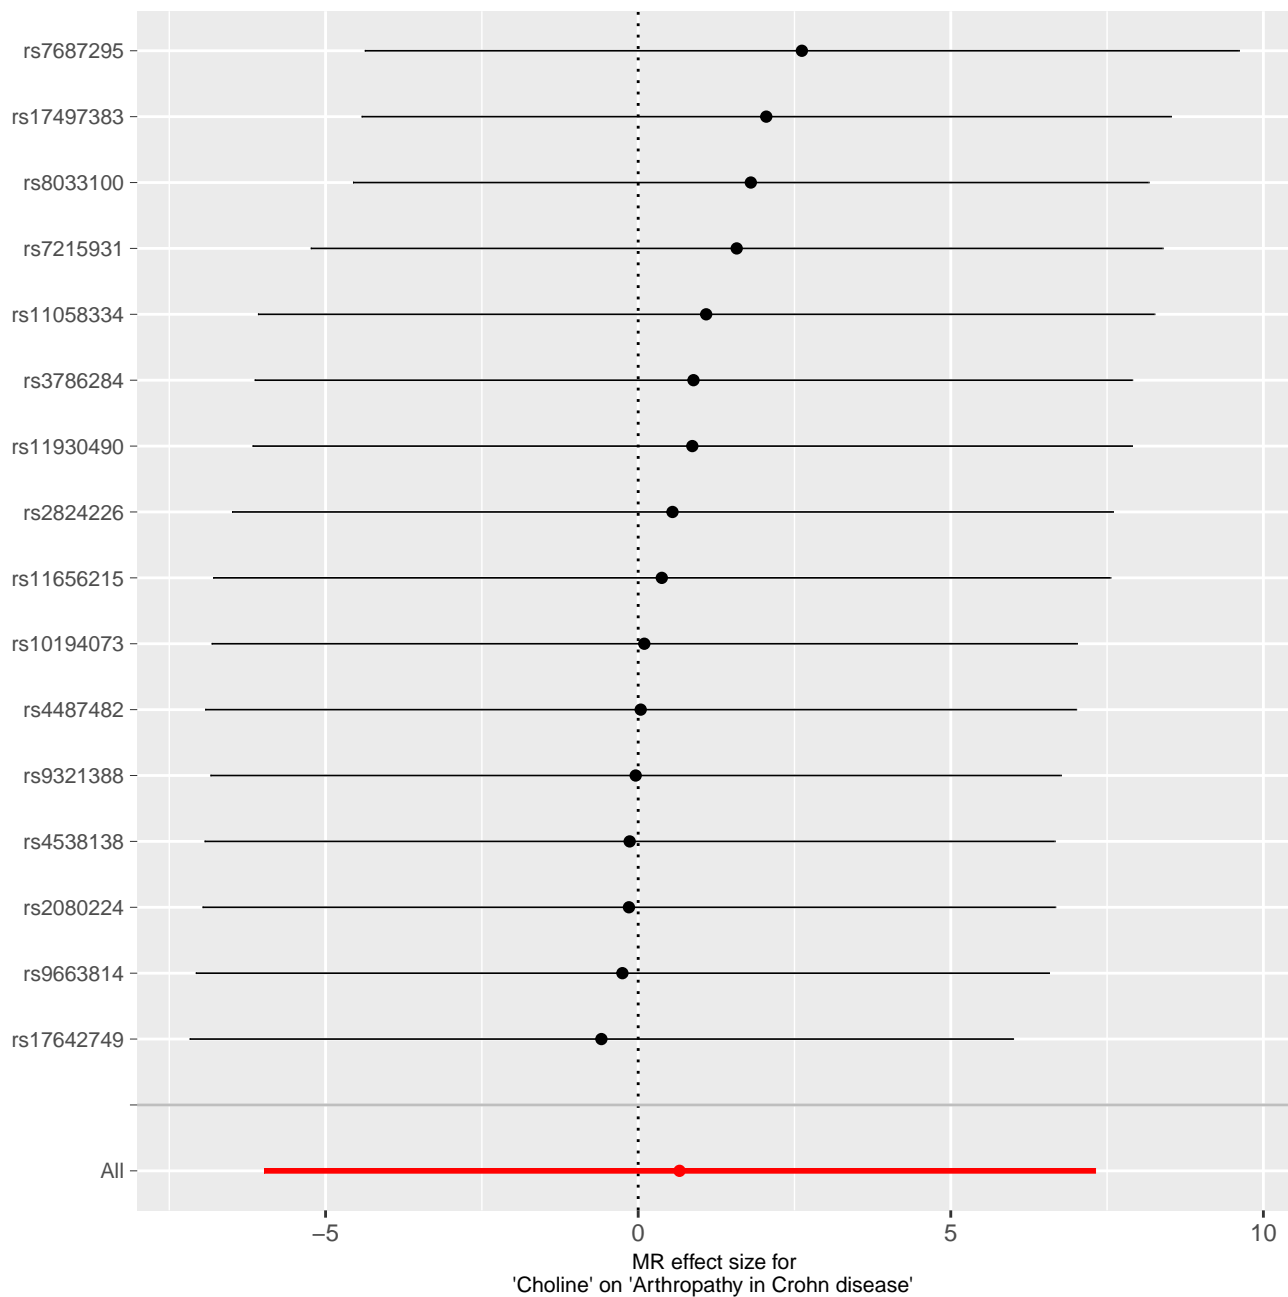

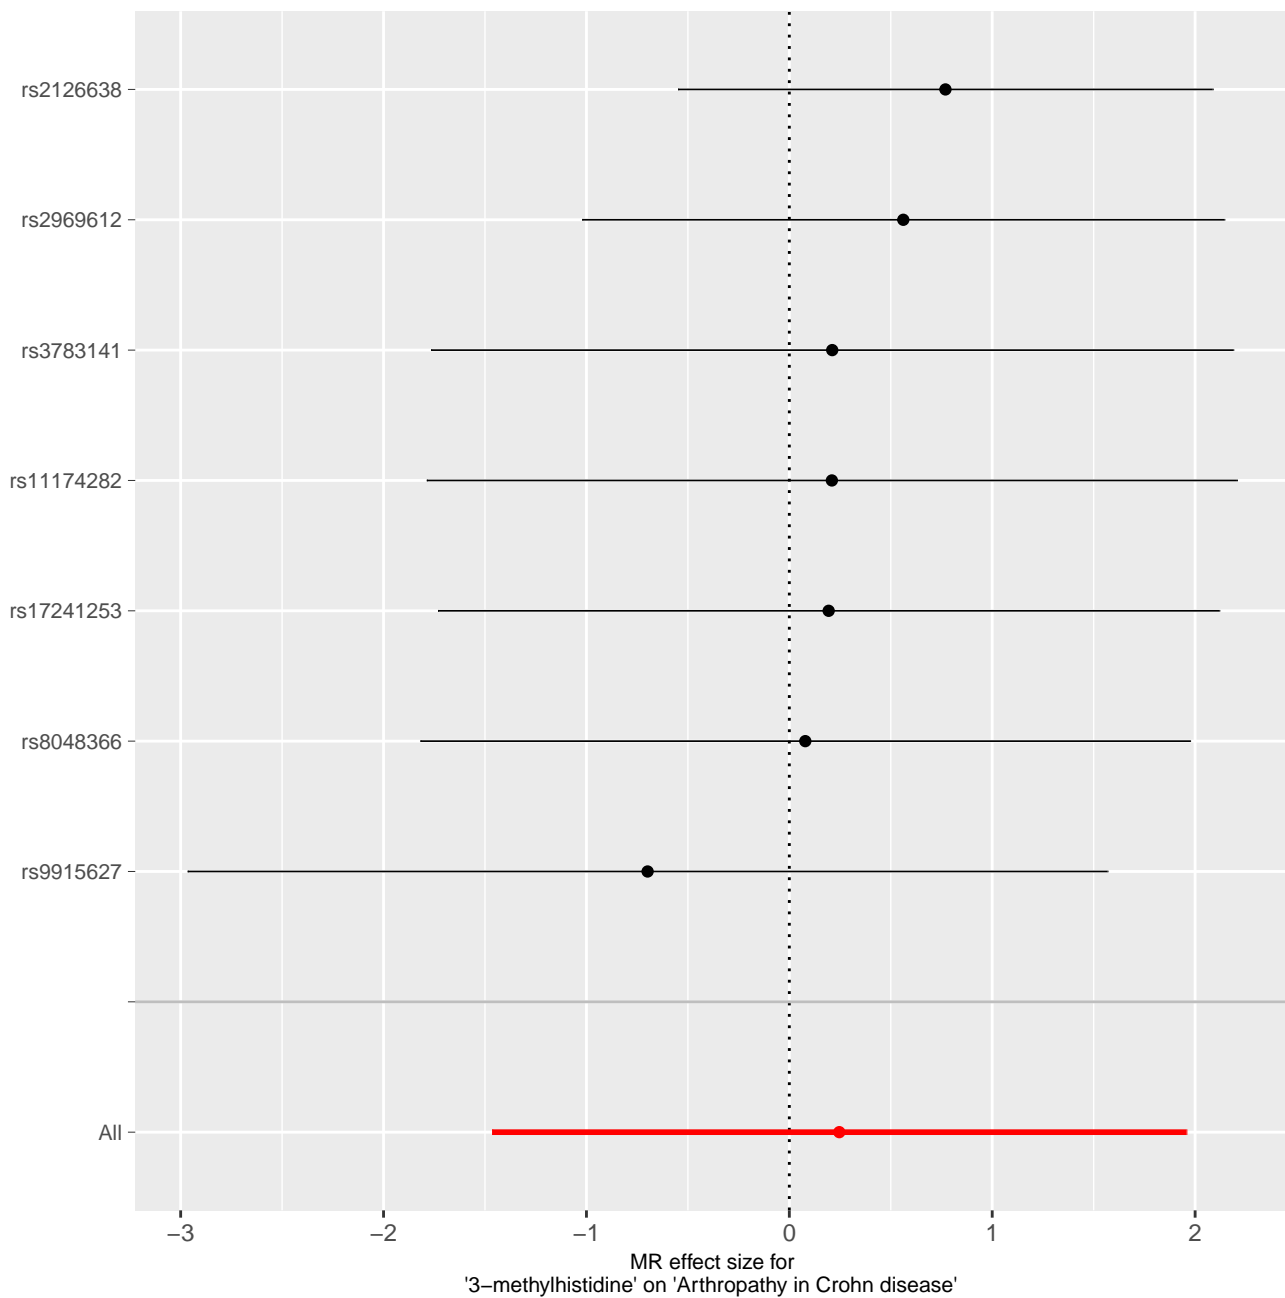

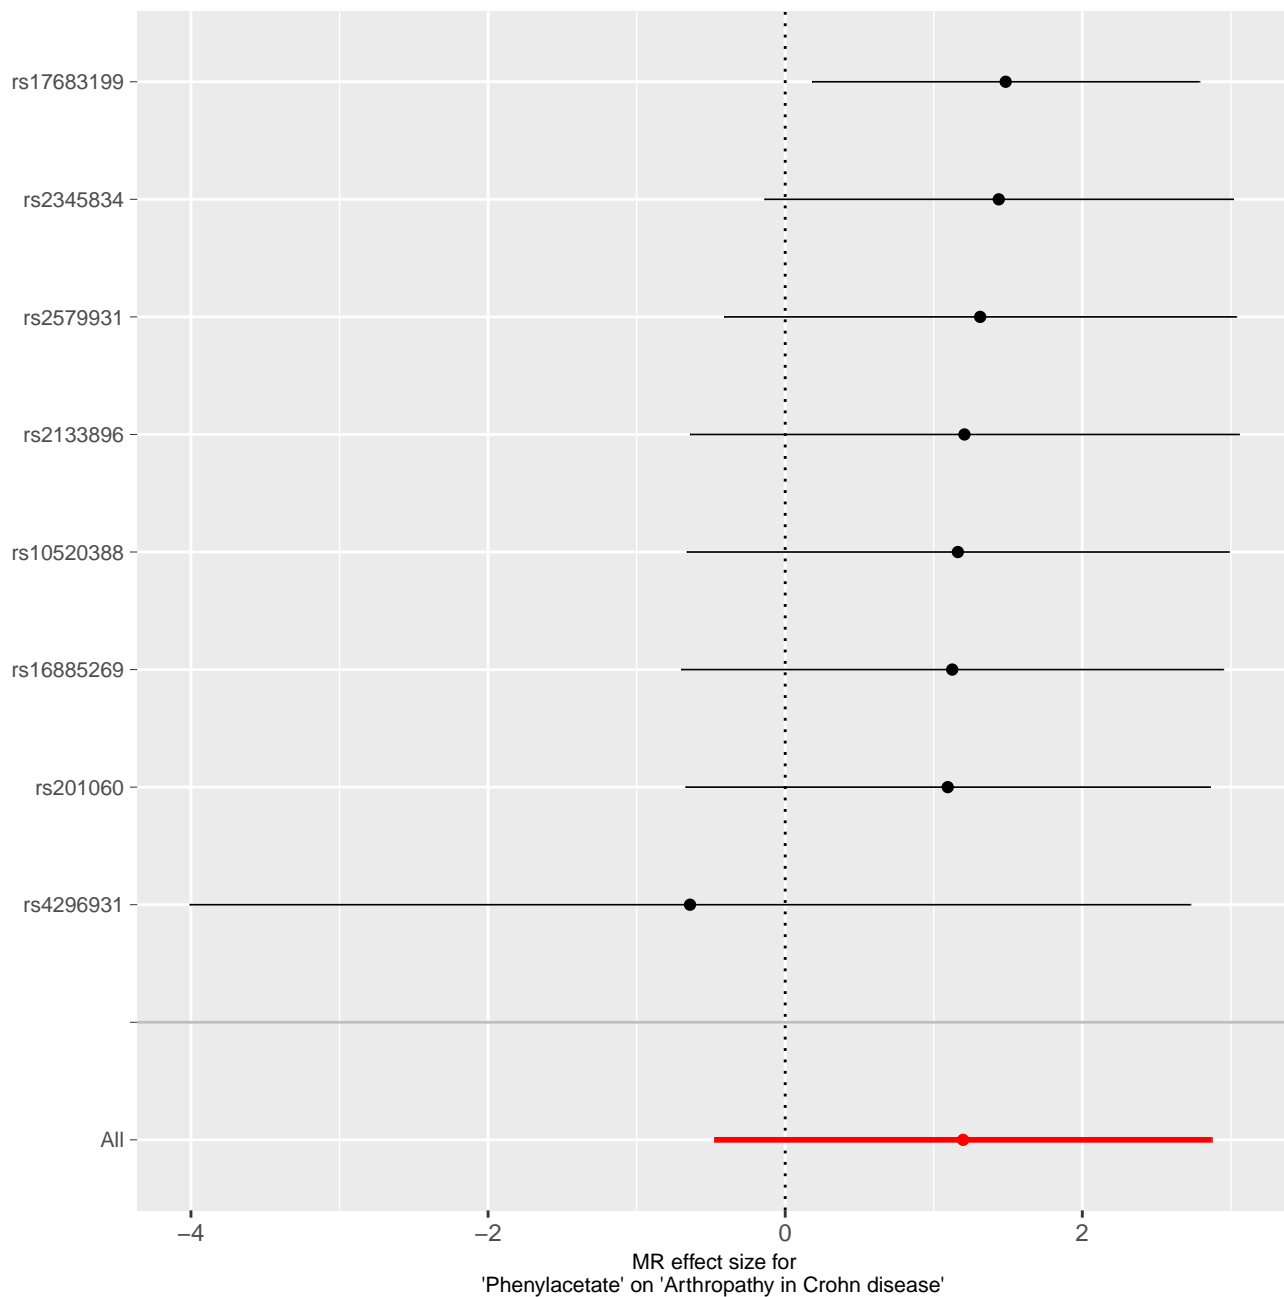

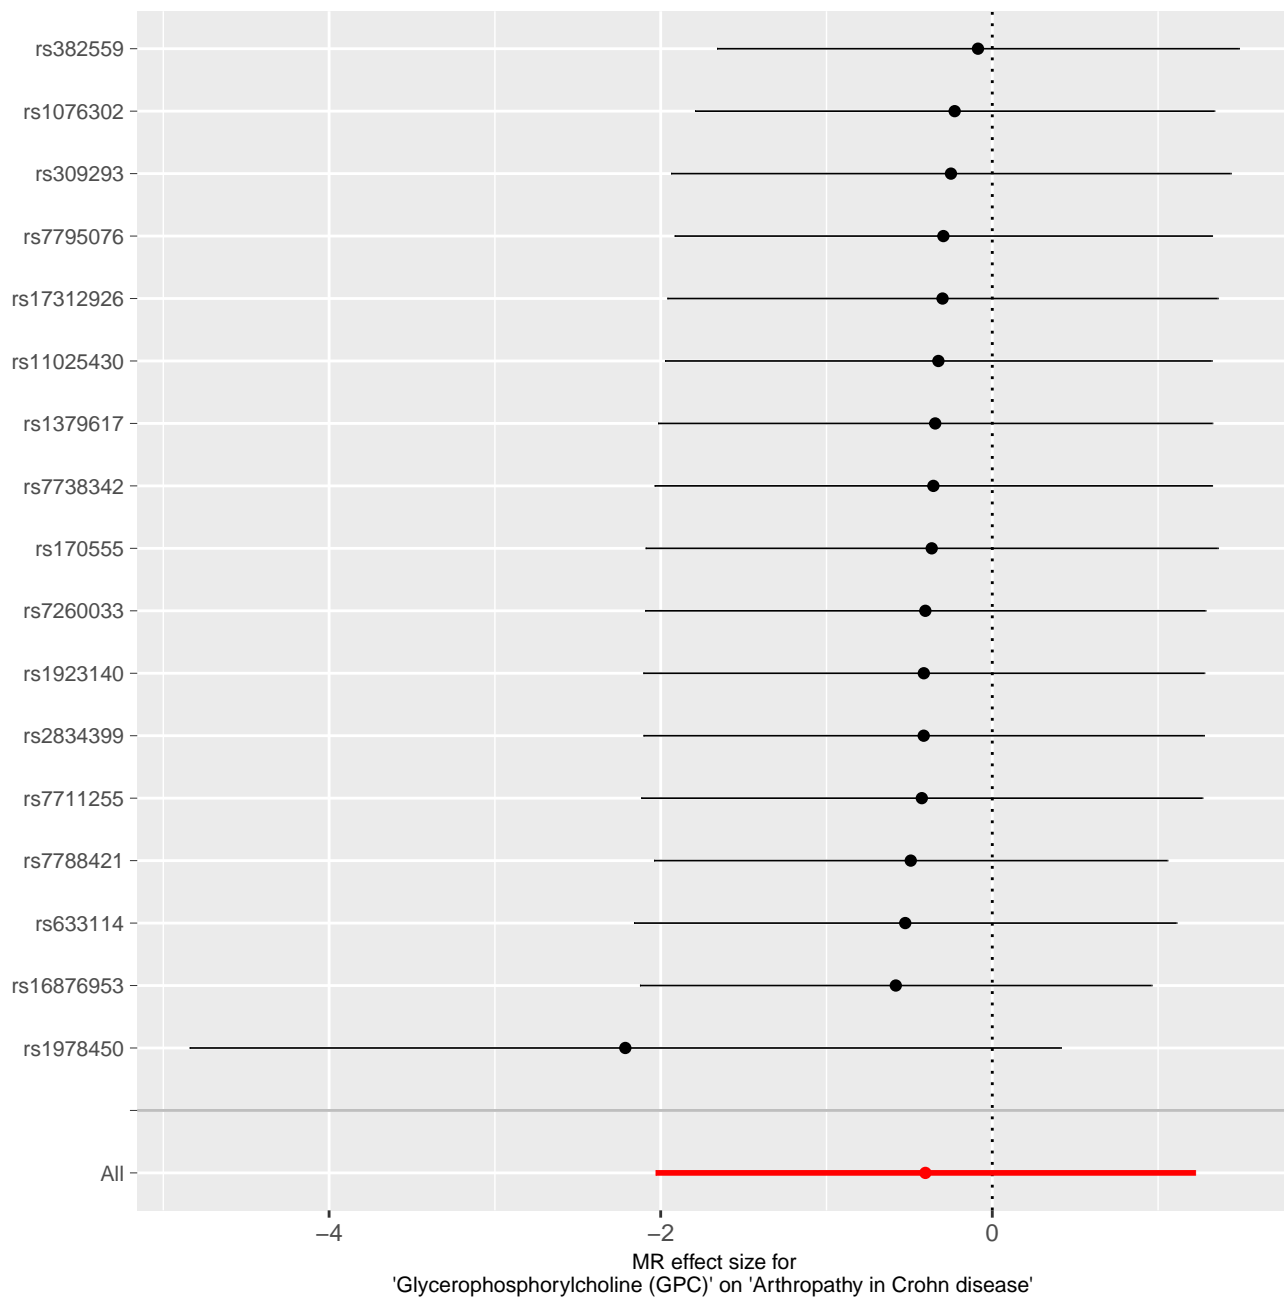

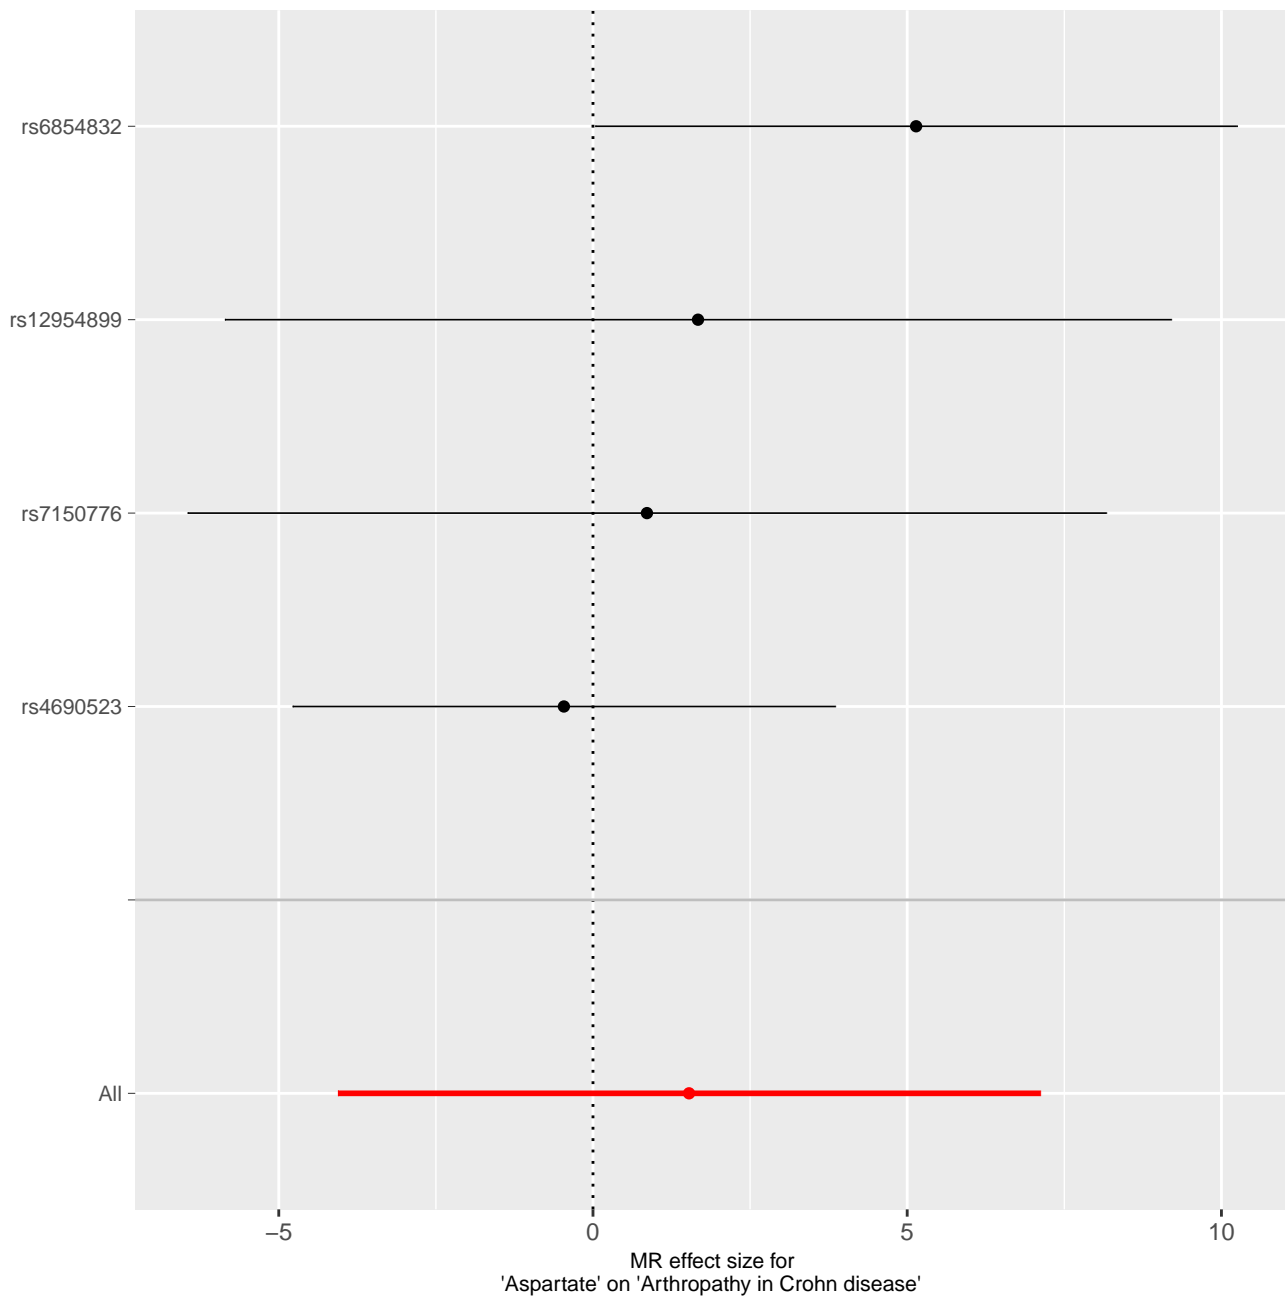



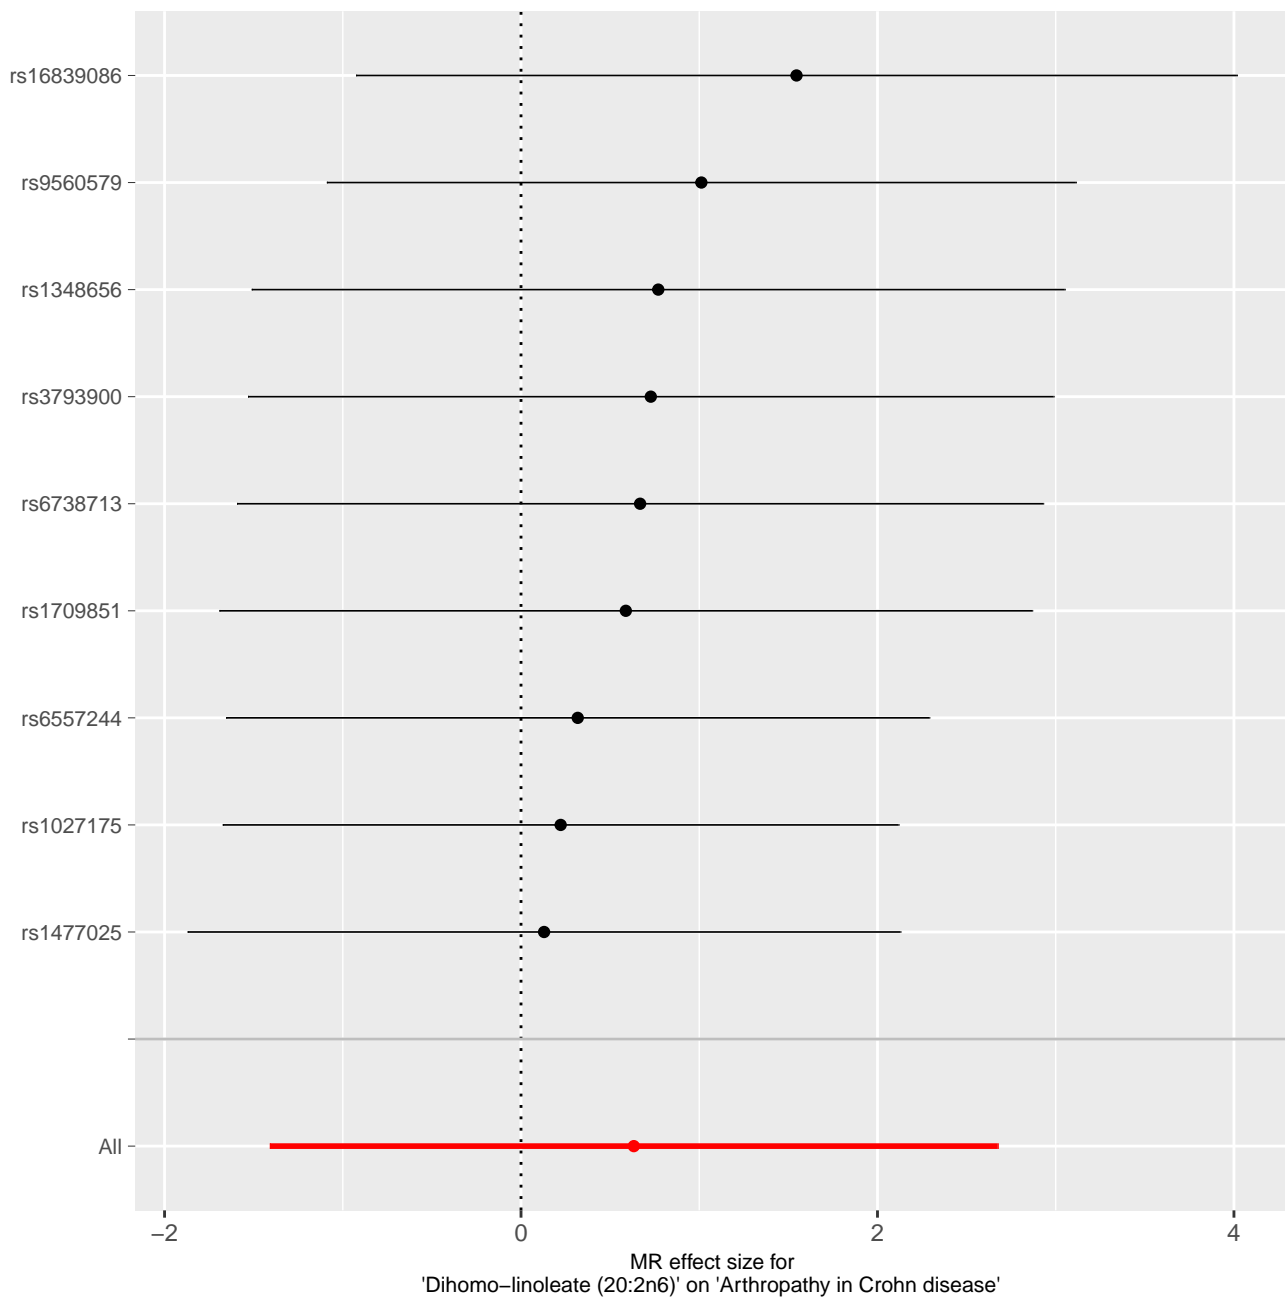

Batch 910 : 2-hydroxystearate on Arthropathy in Crohn disease

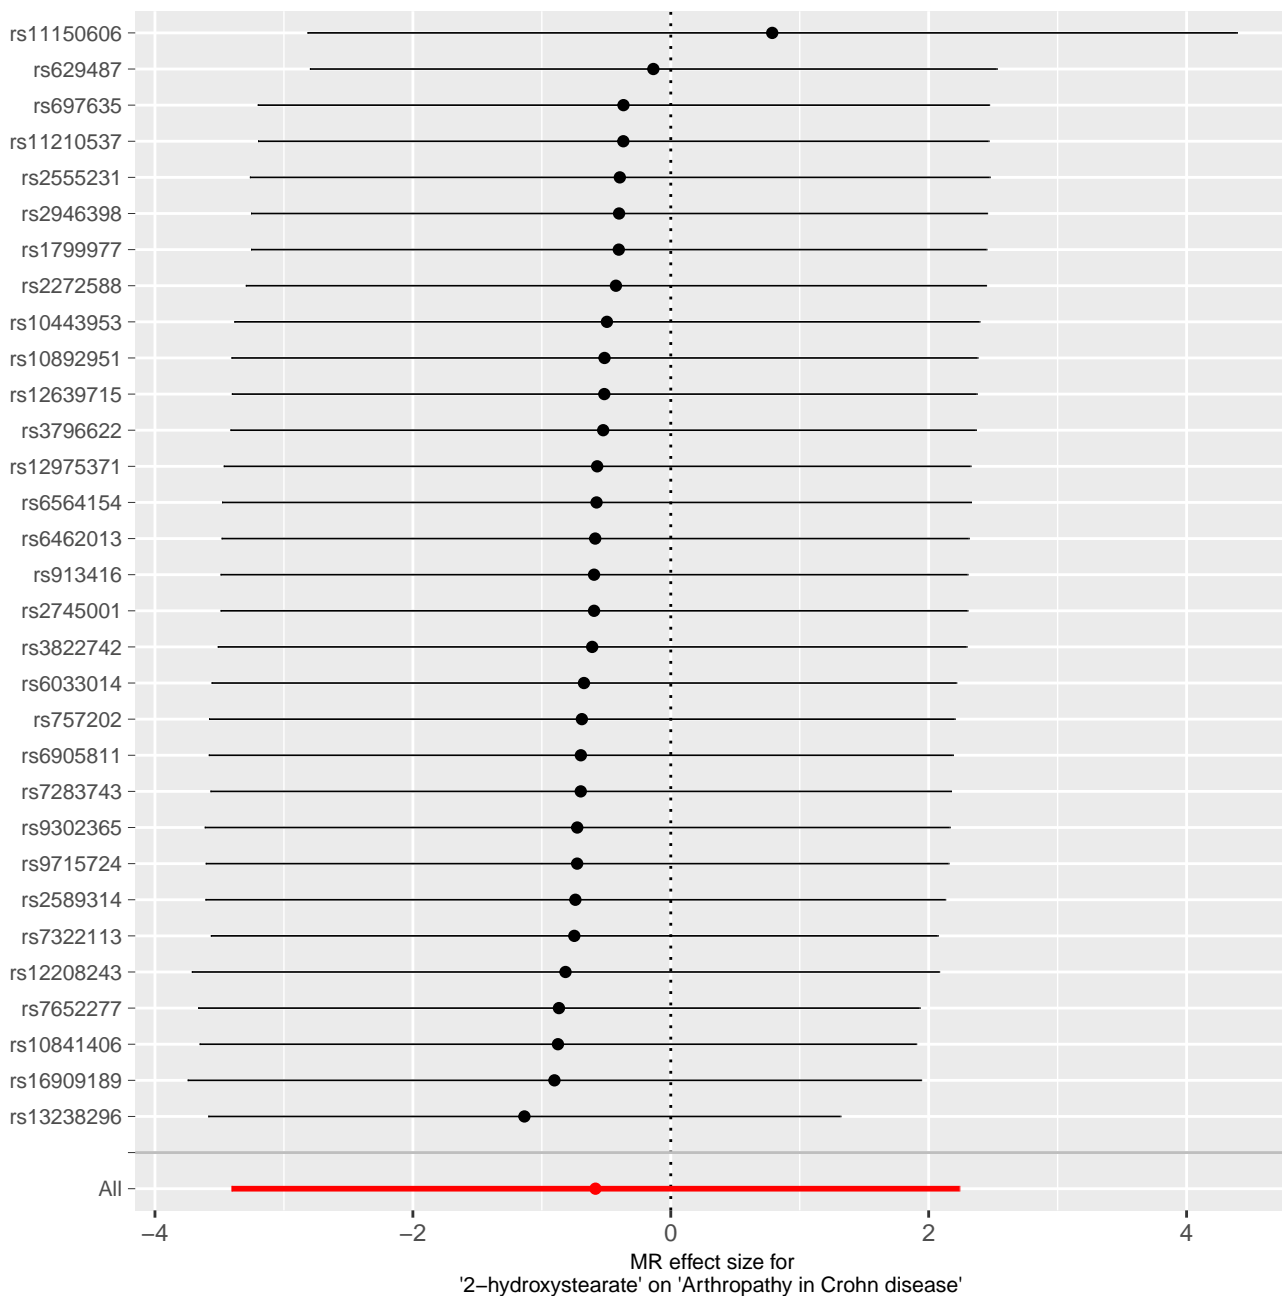

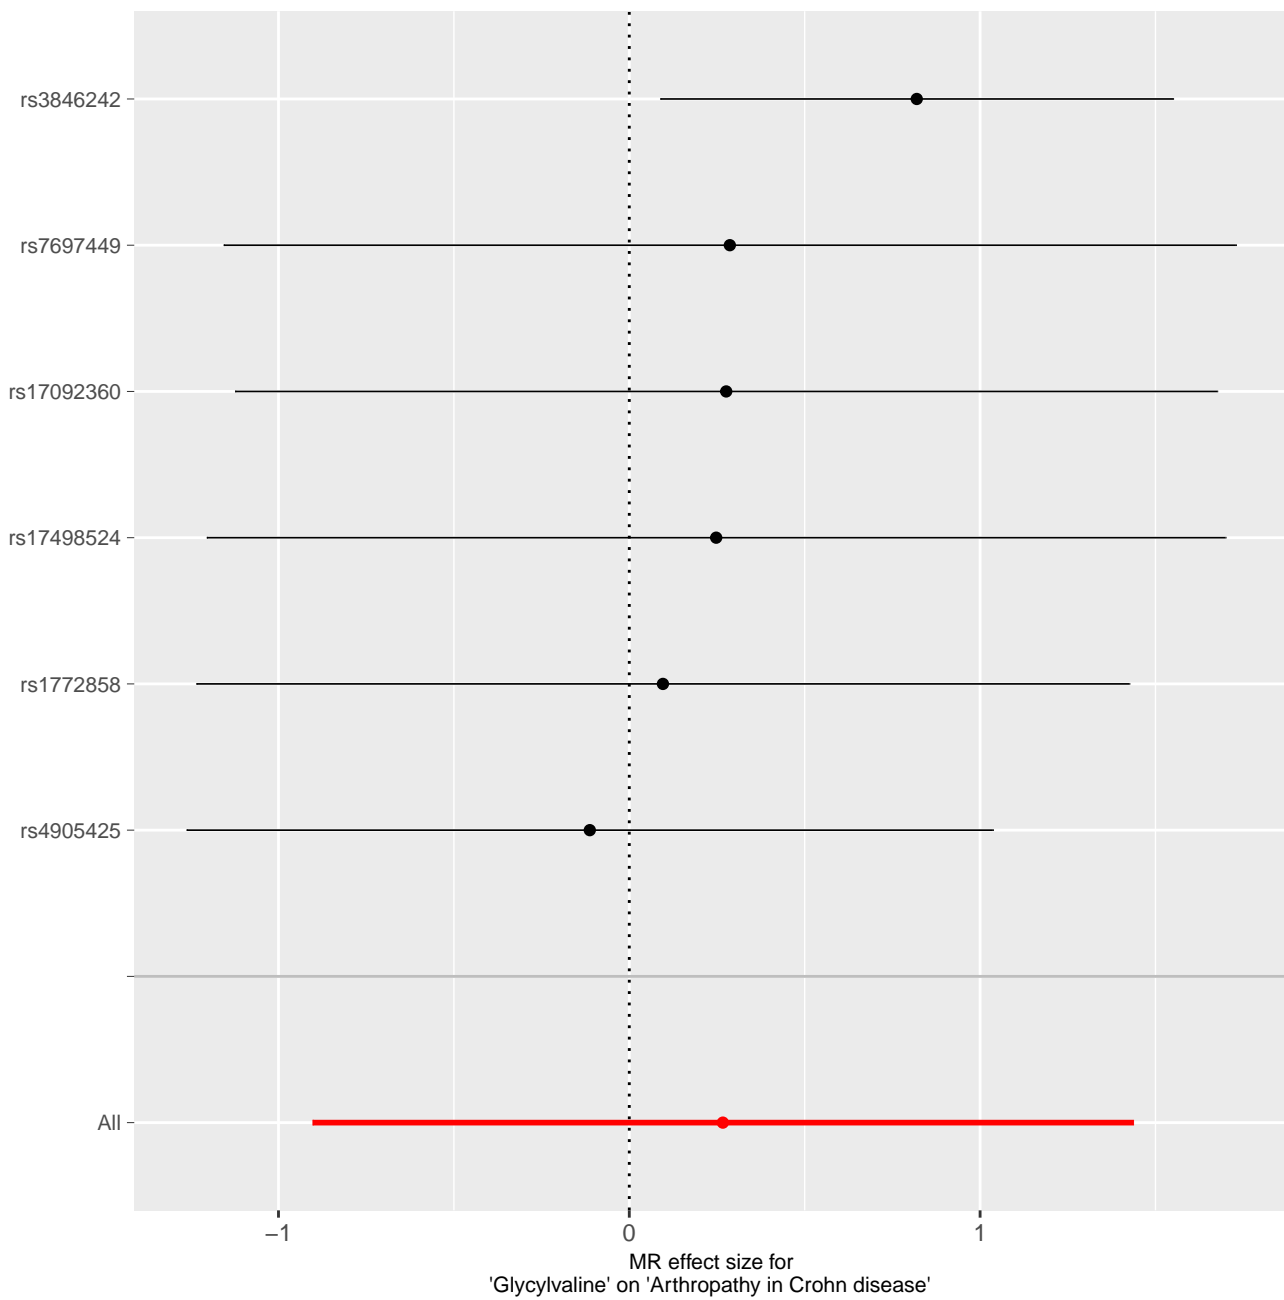

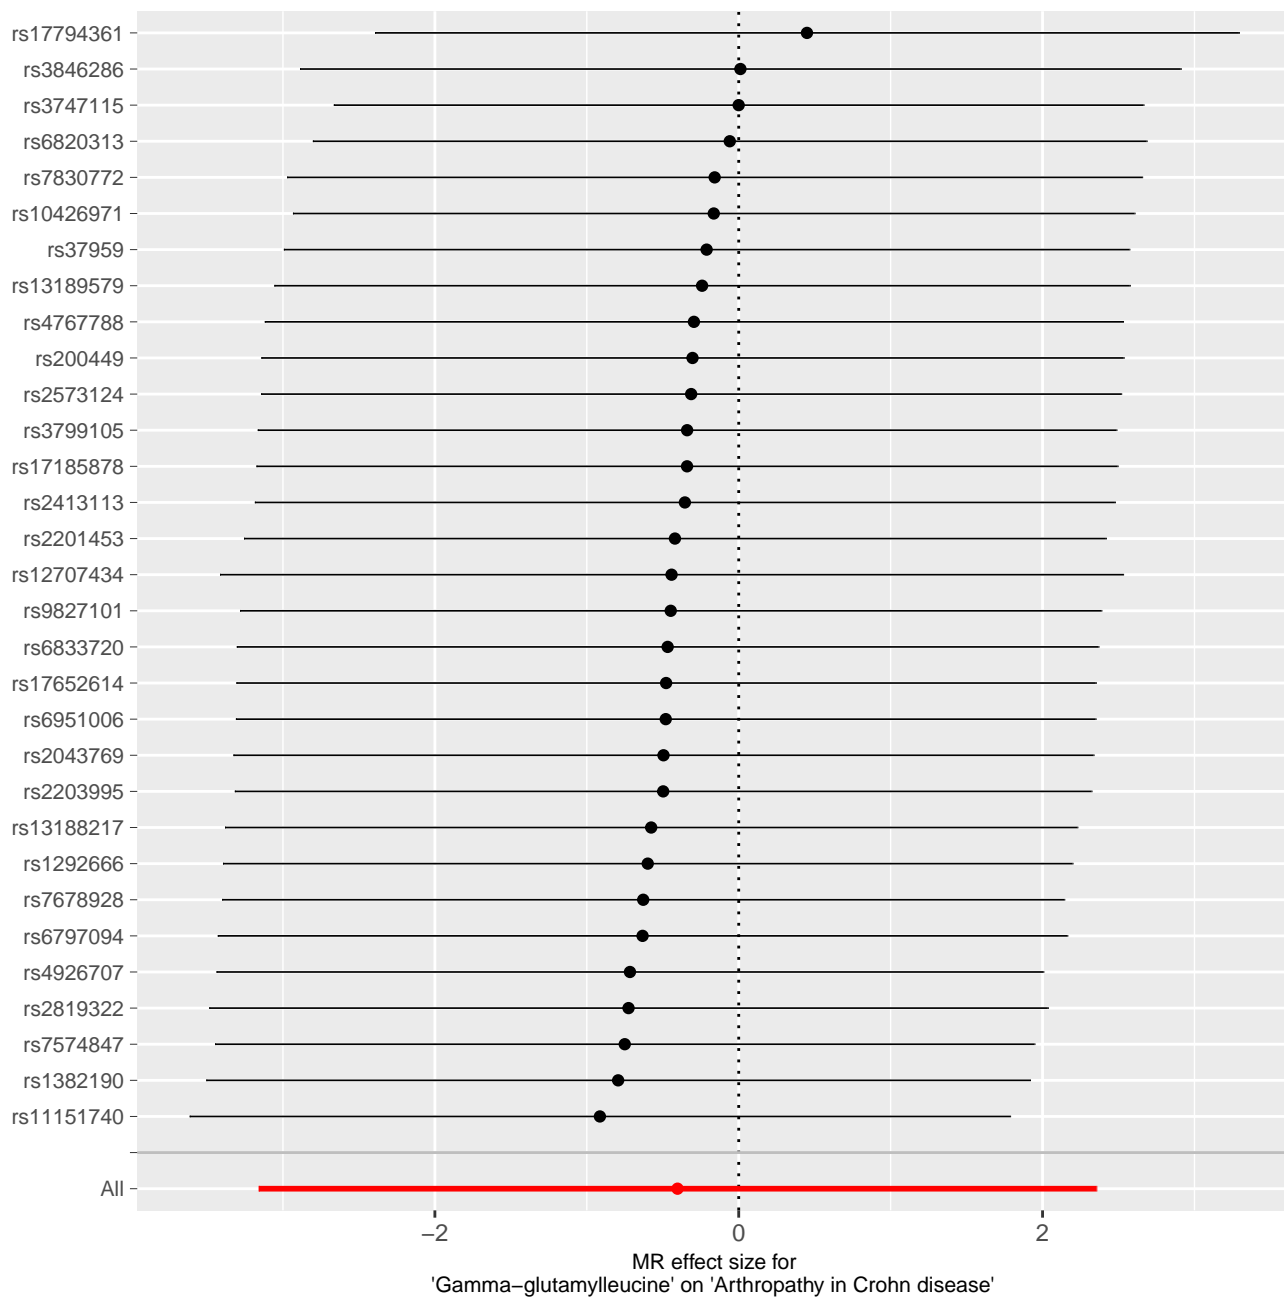

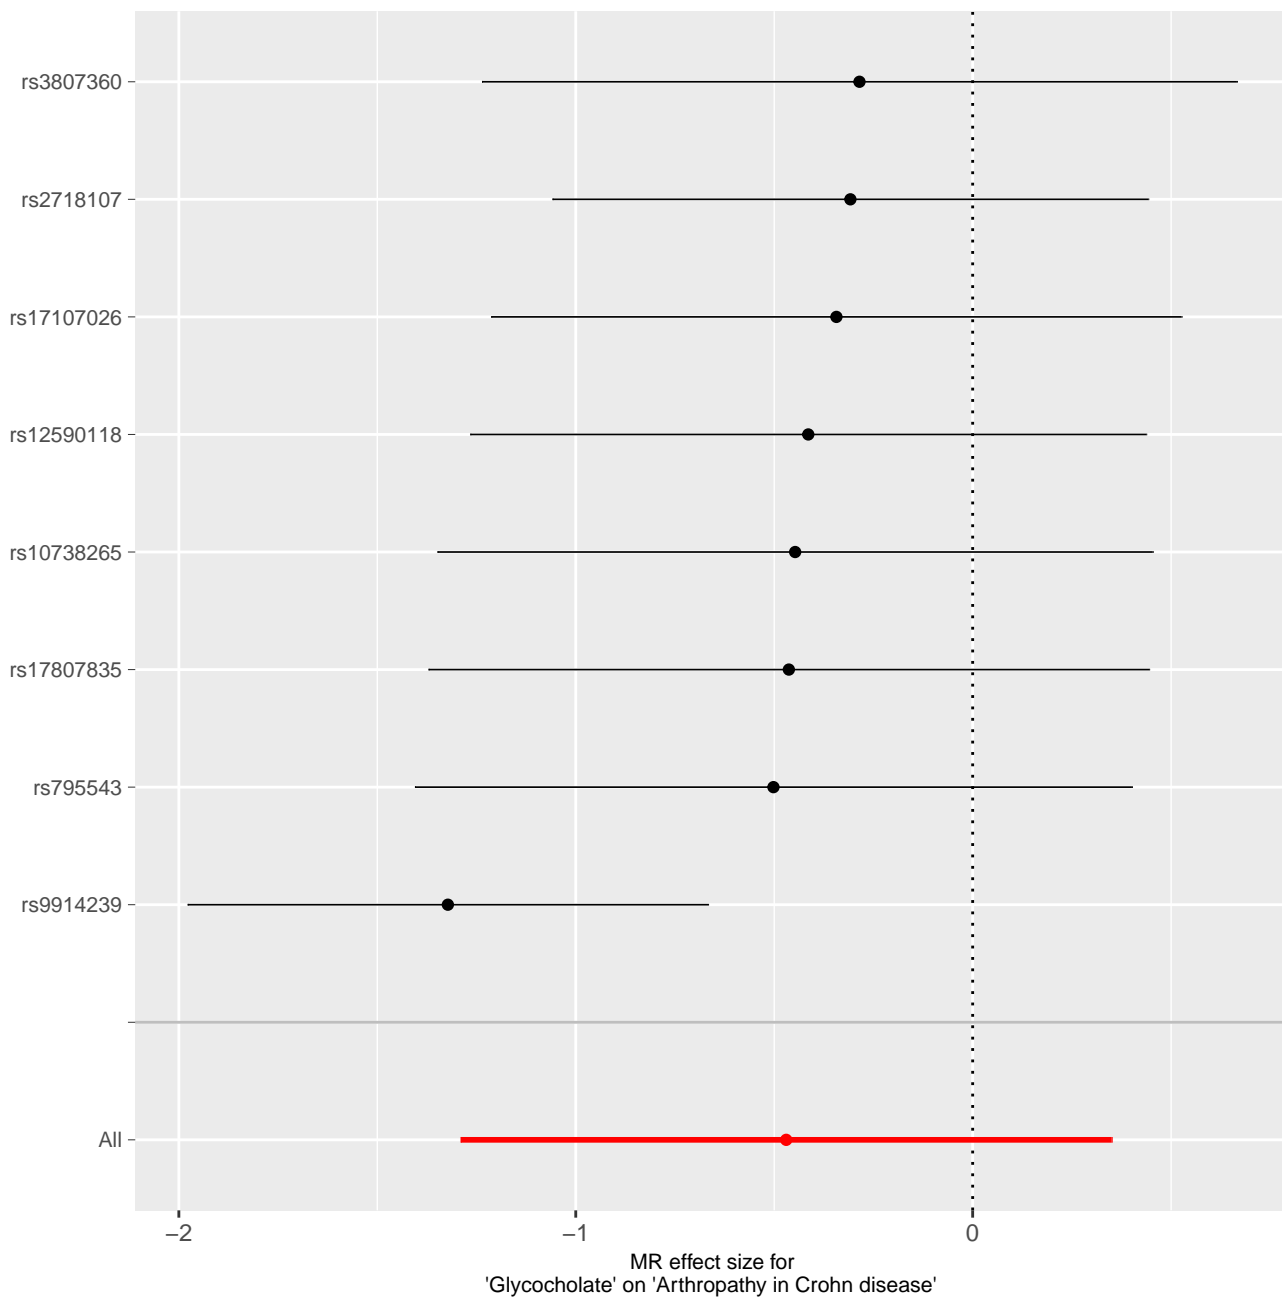

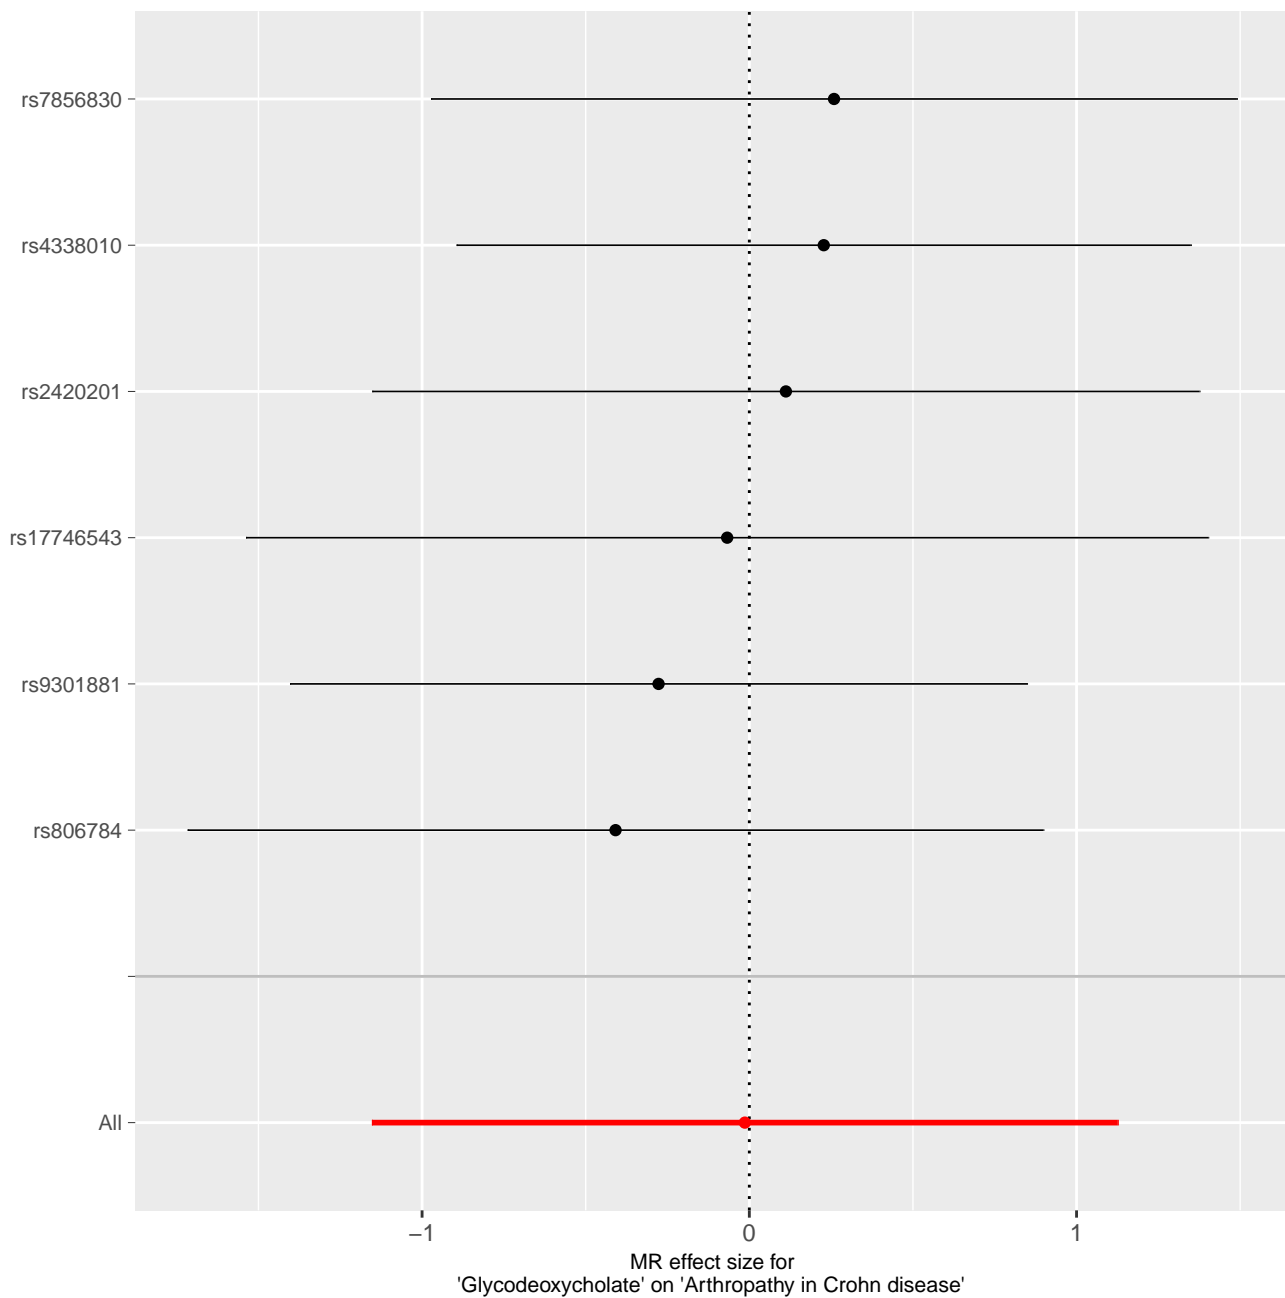

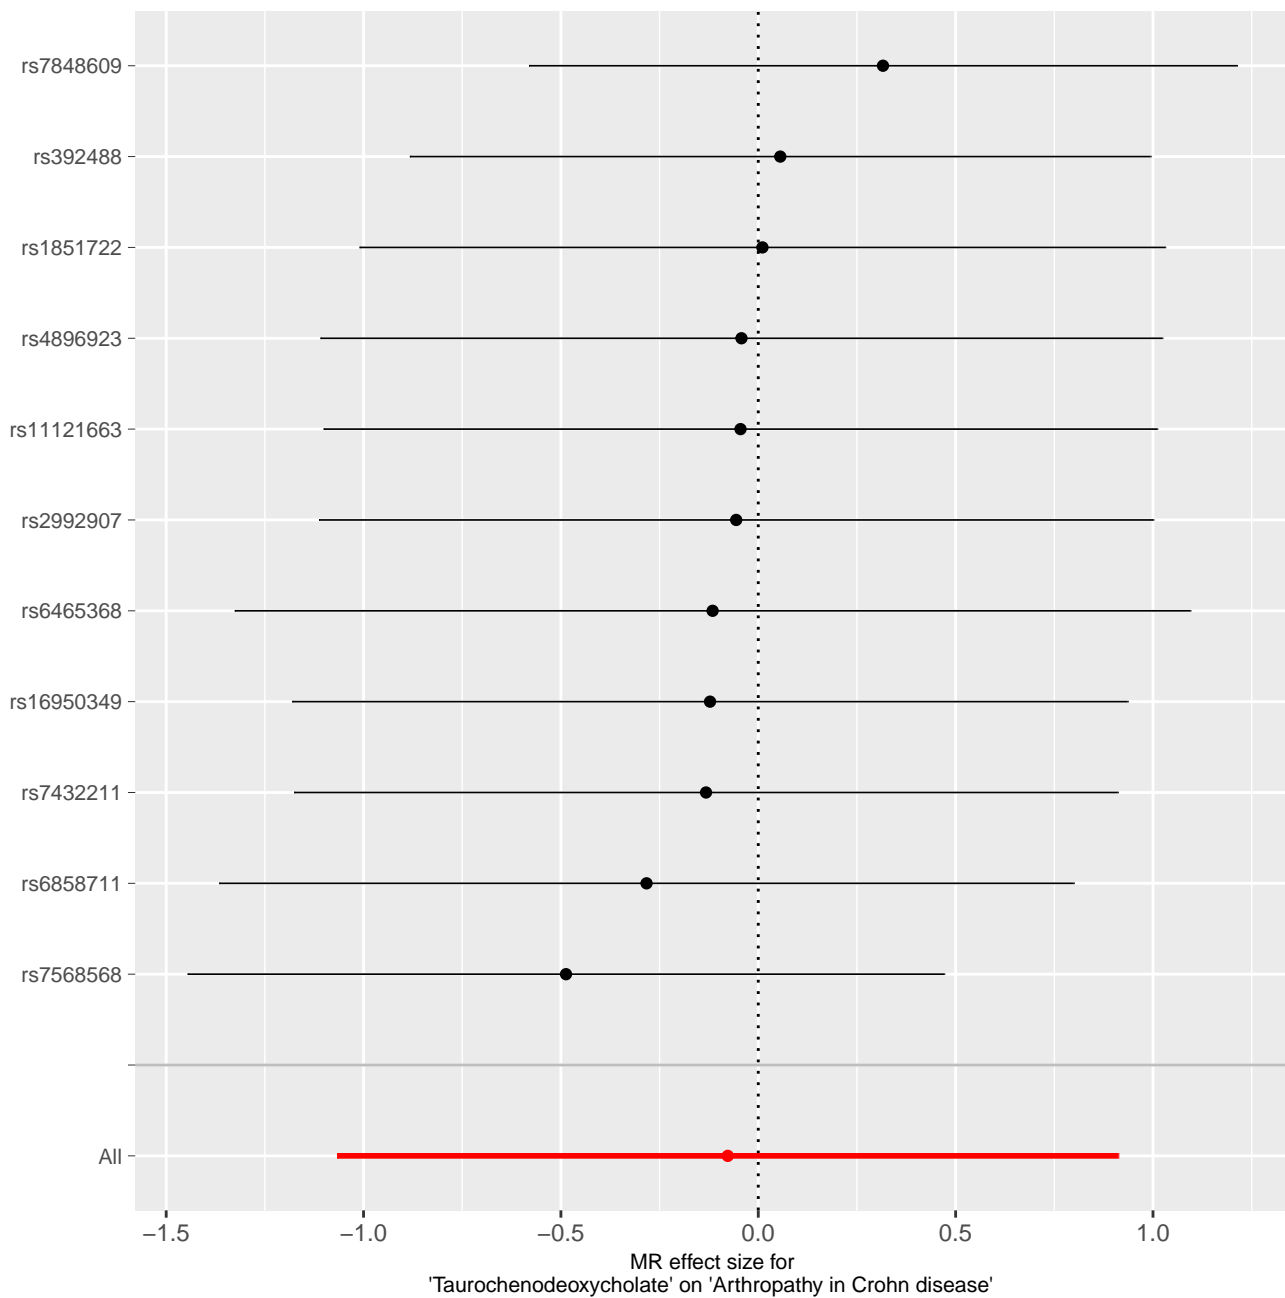

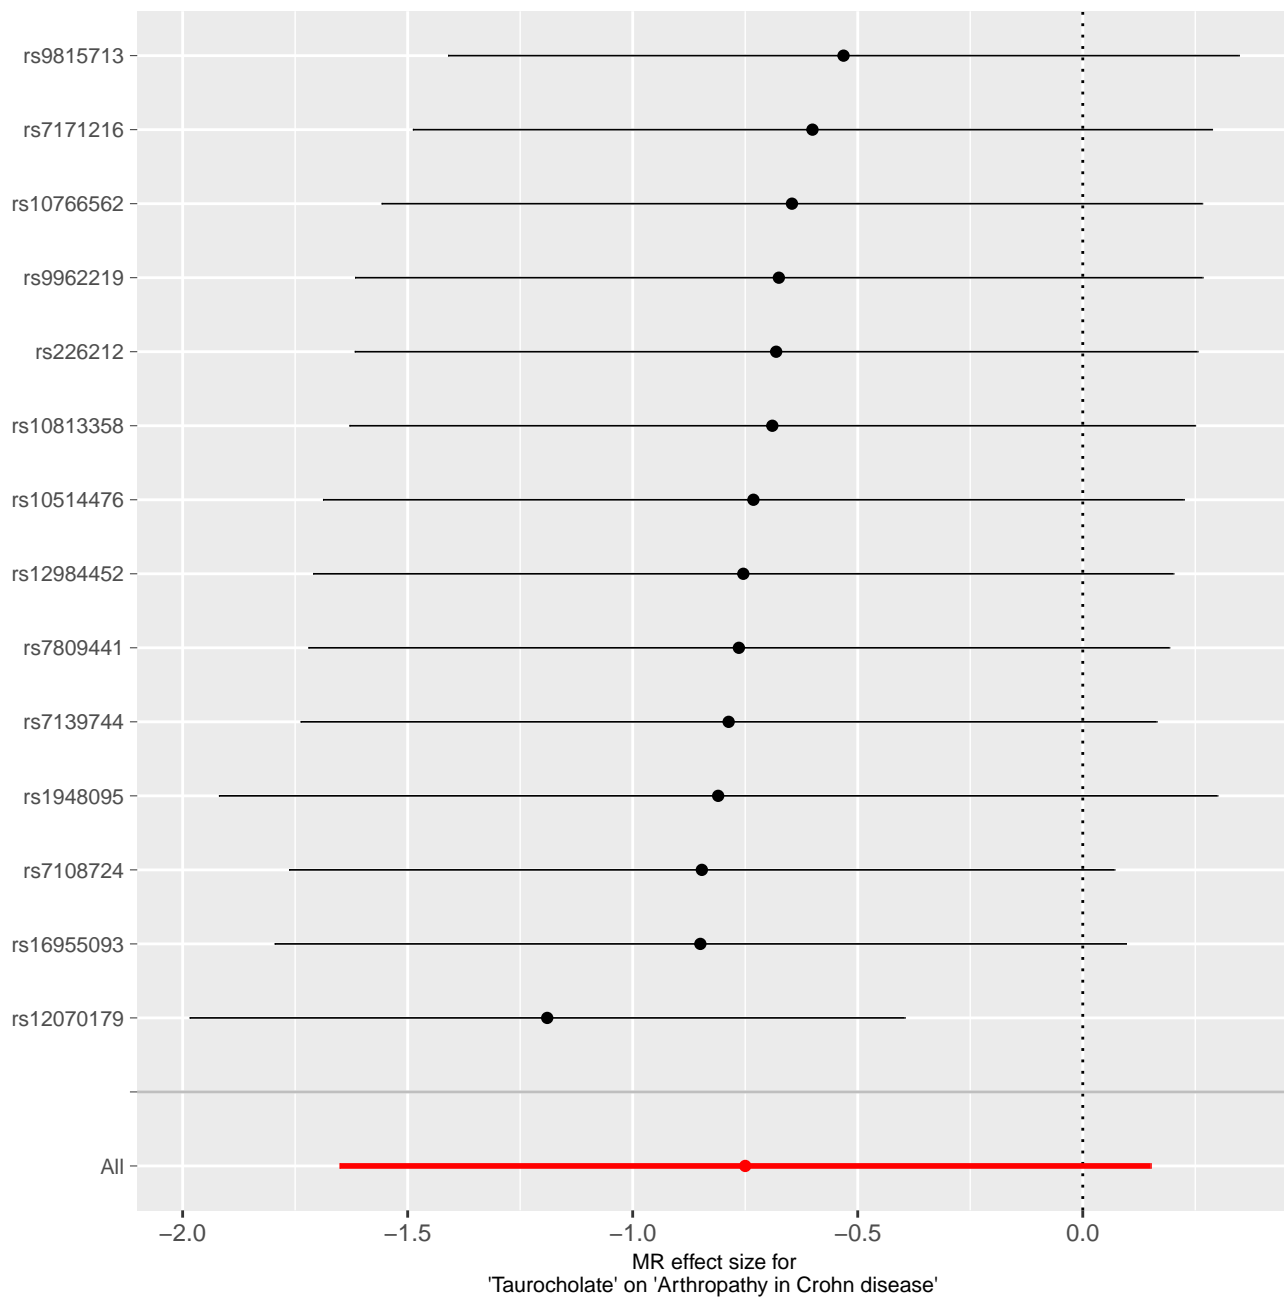



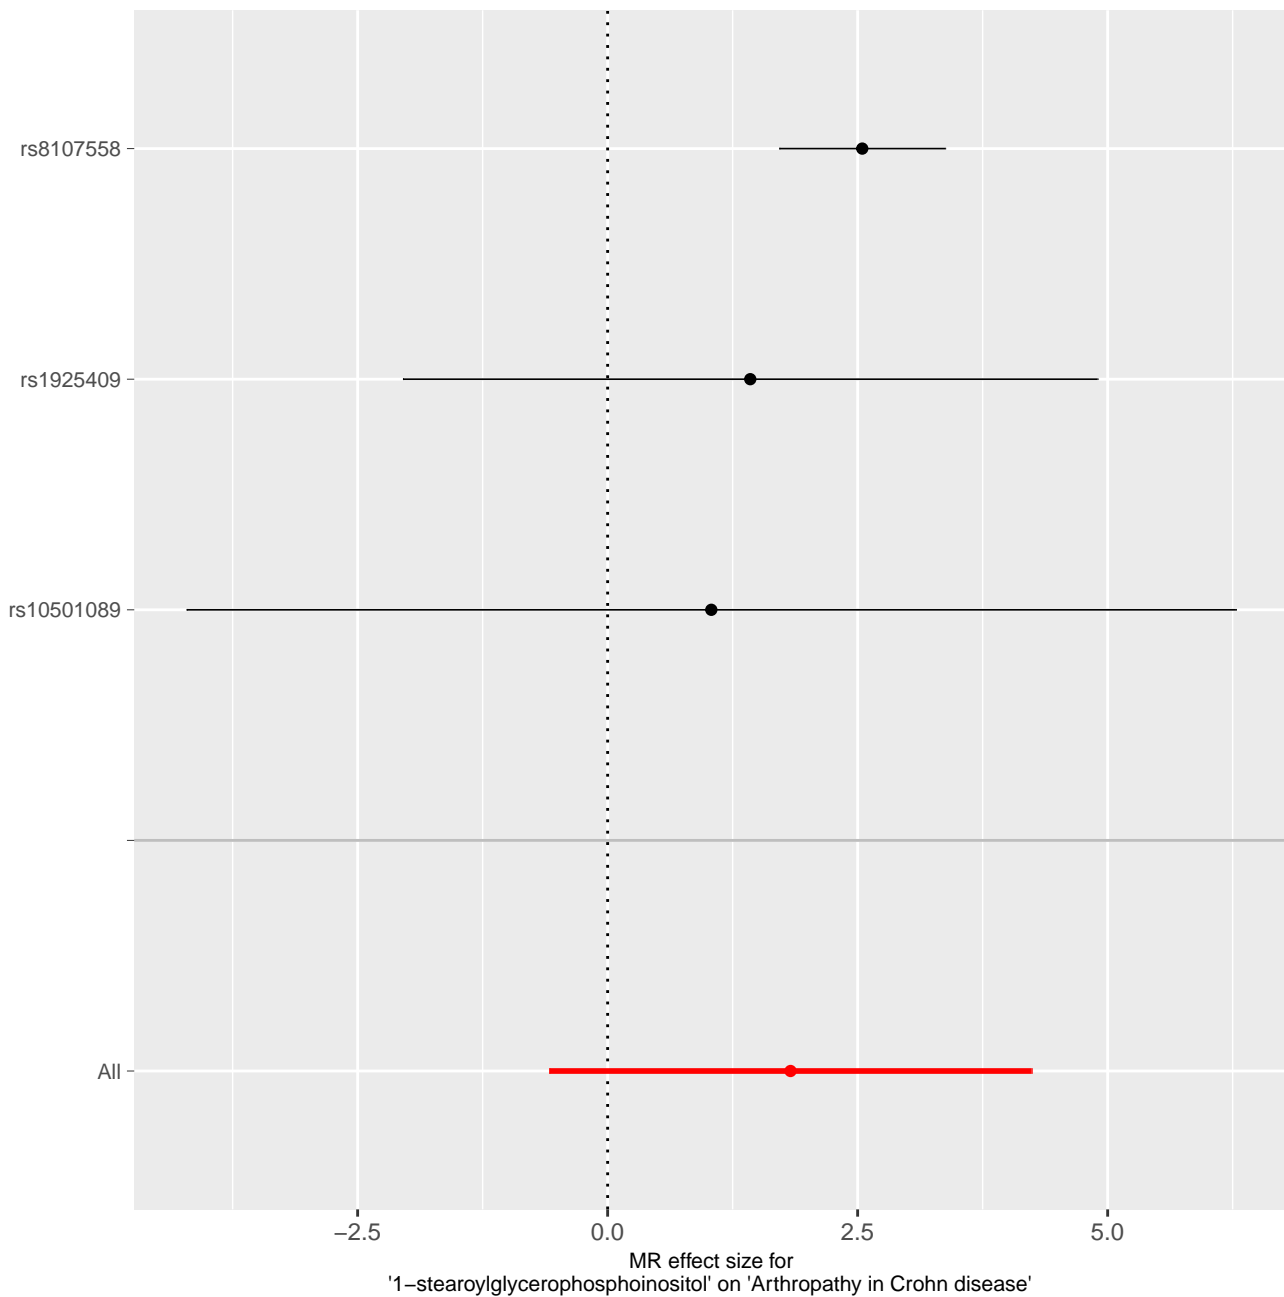

rs9756306

rs7570971

rs3800993

All

-5

0

5

10

MR effect size for  
'1,5-anhydroglucitol (1,5-AG)' on 'Arthropathy in Crohn disease'

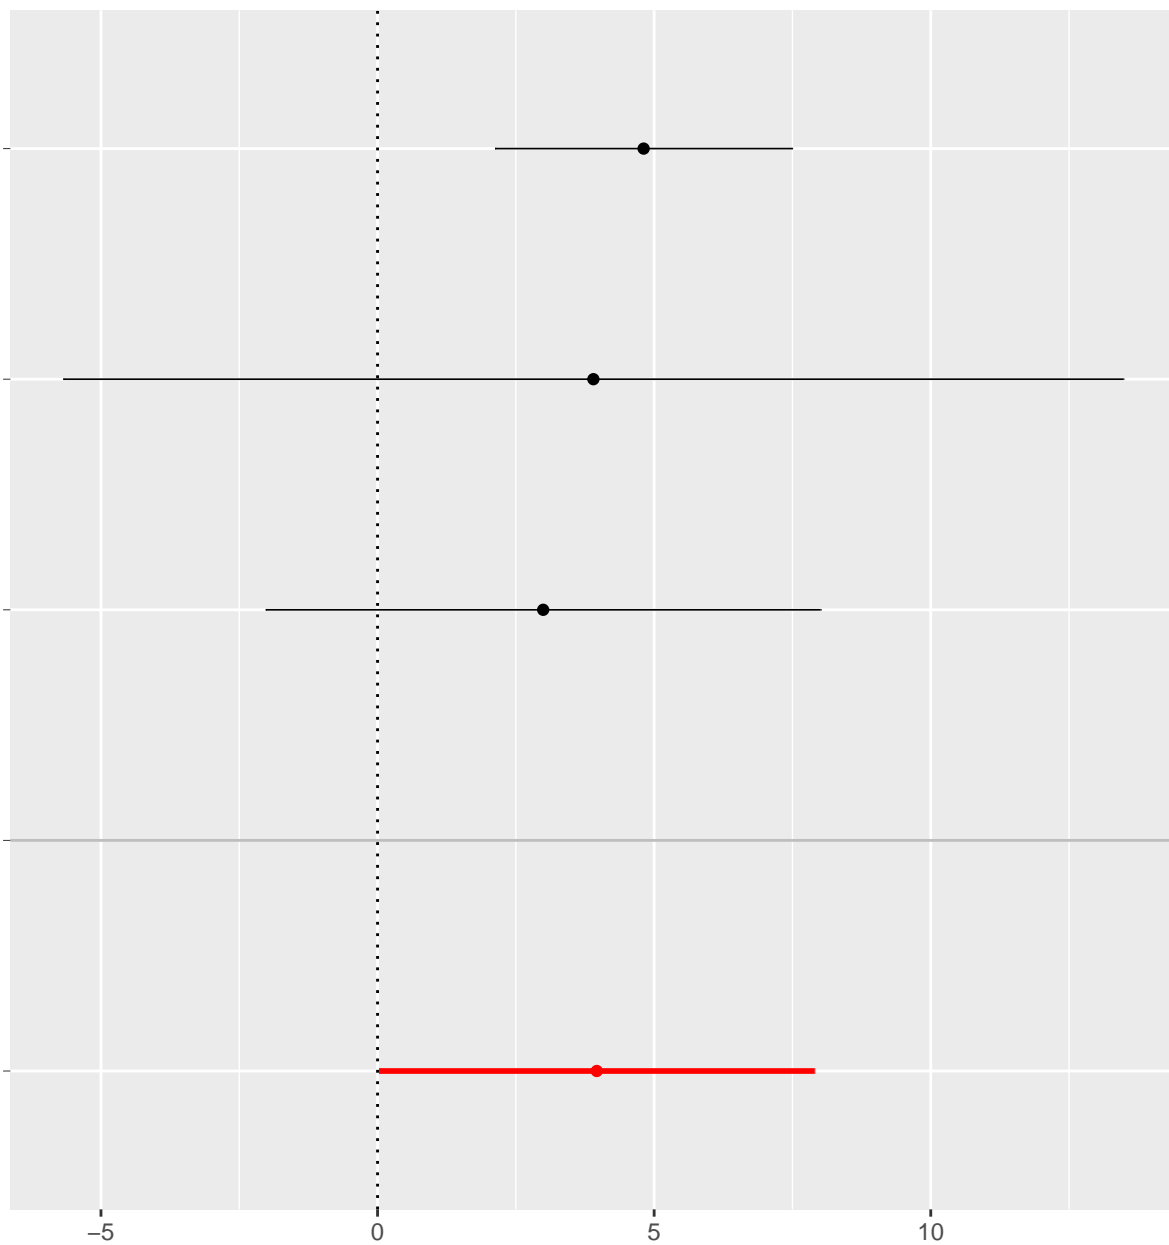

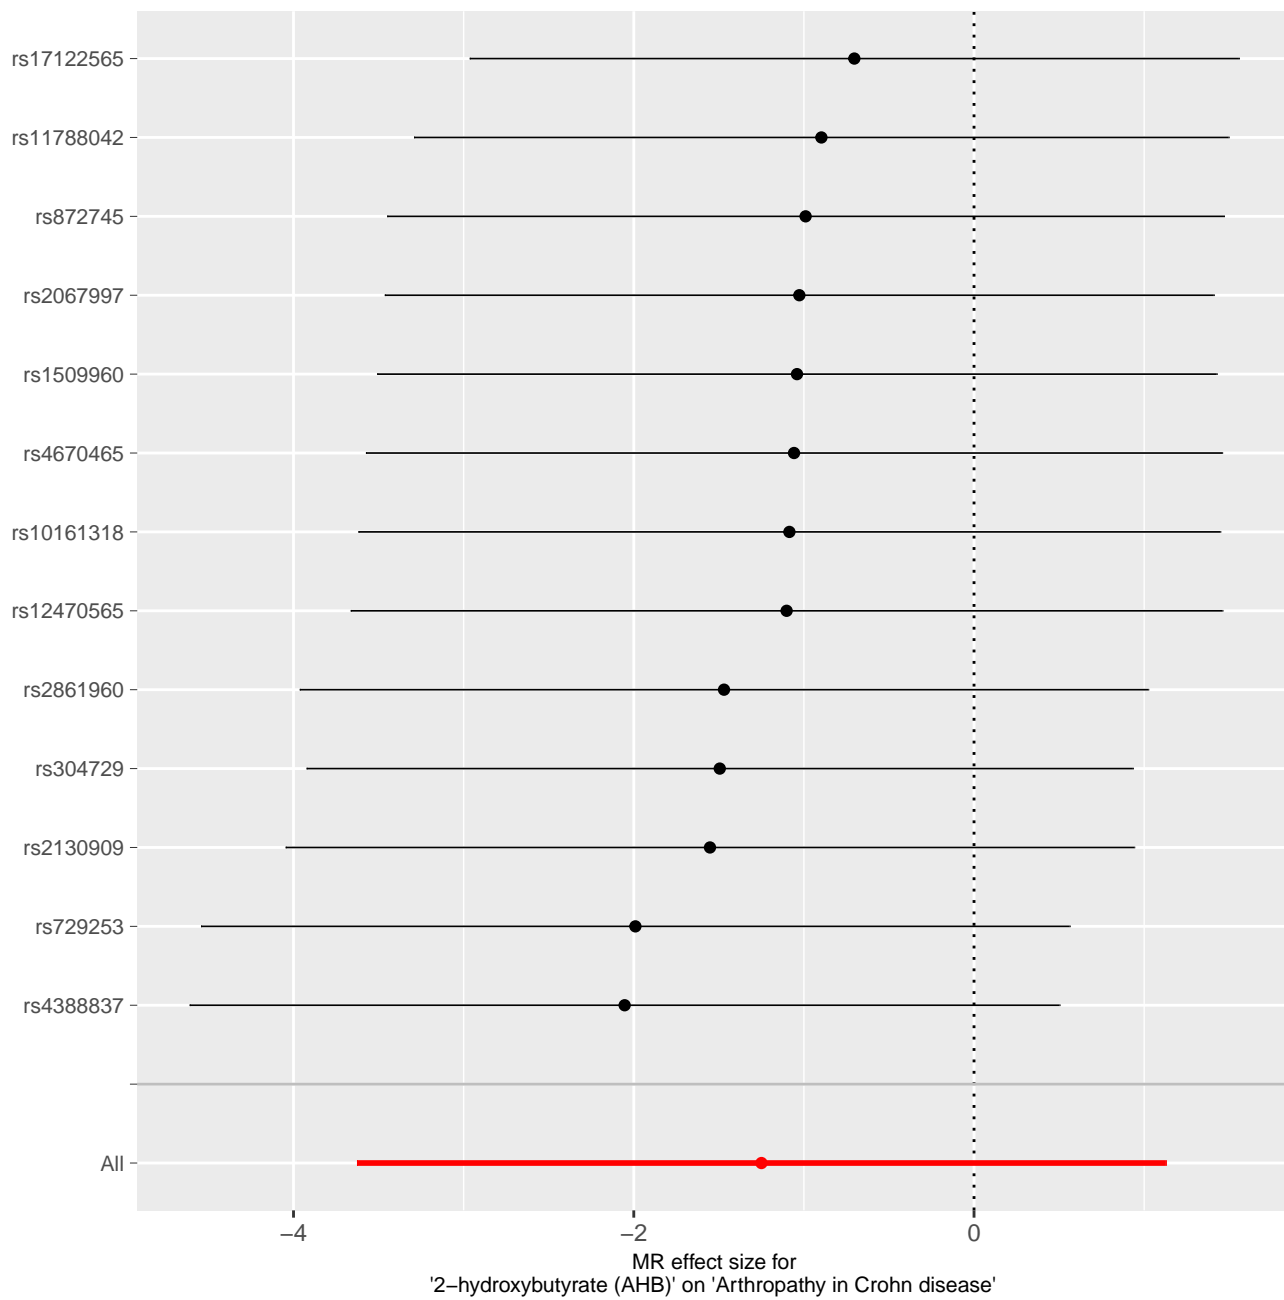

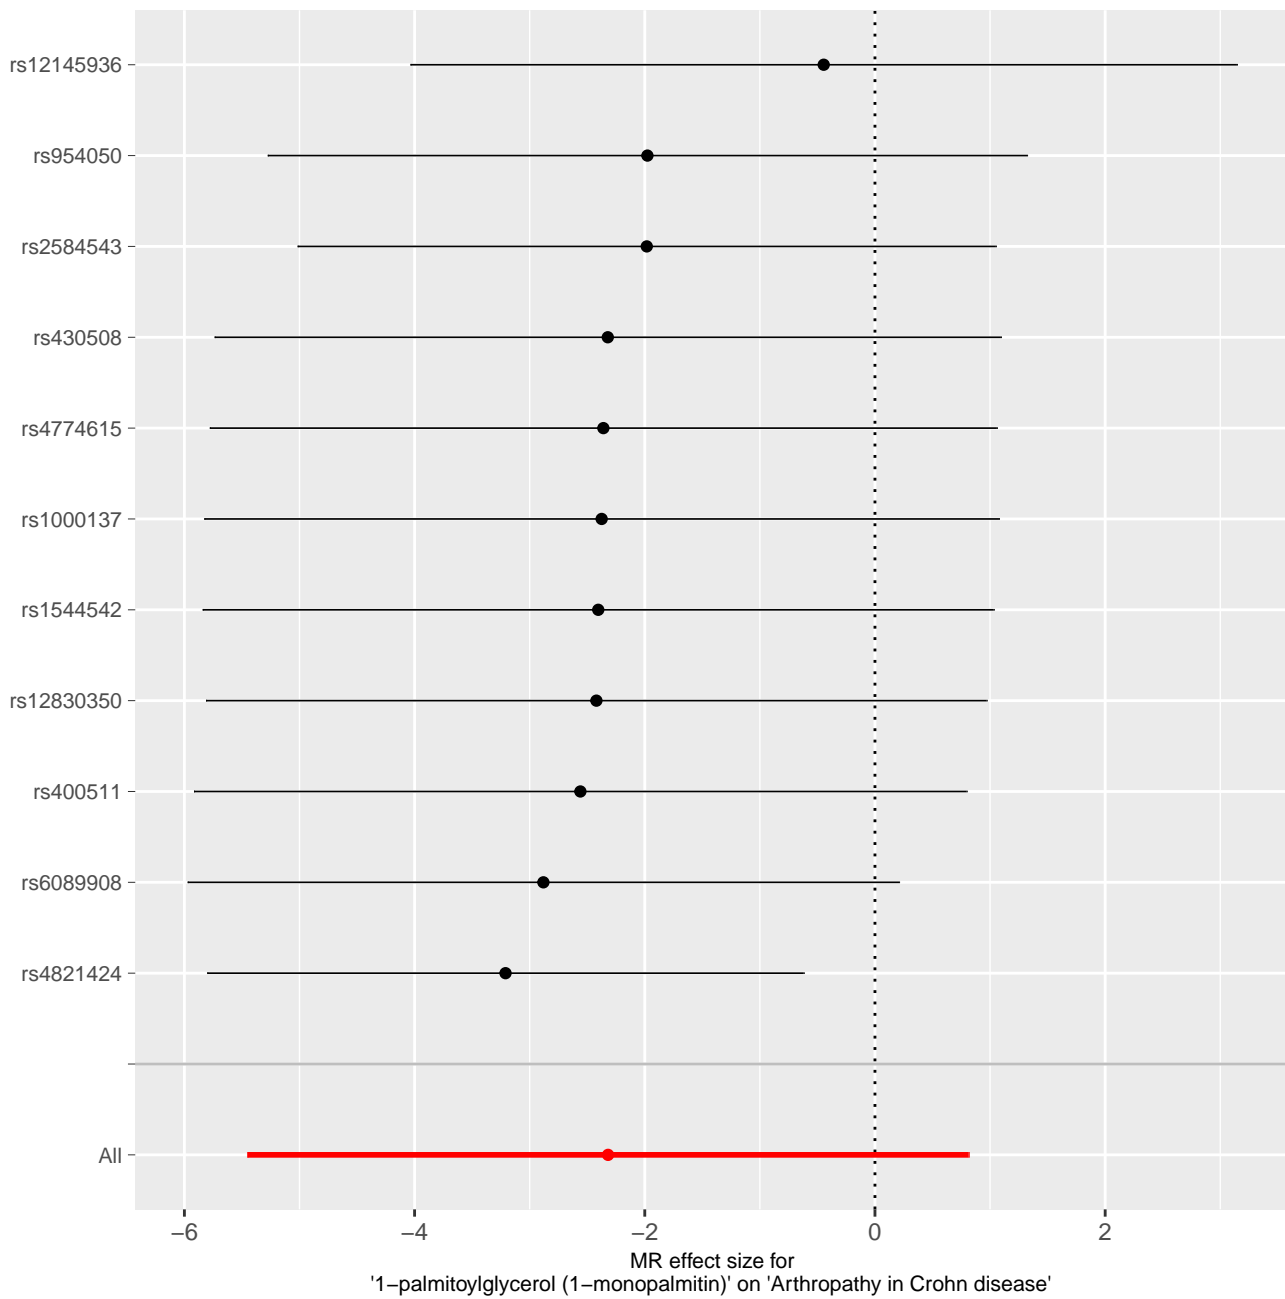

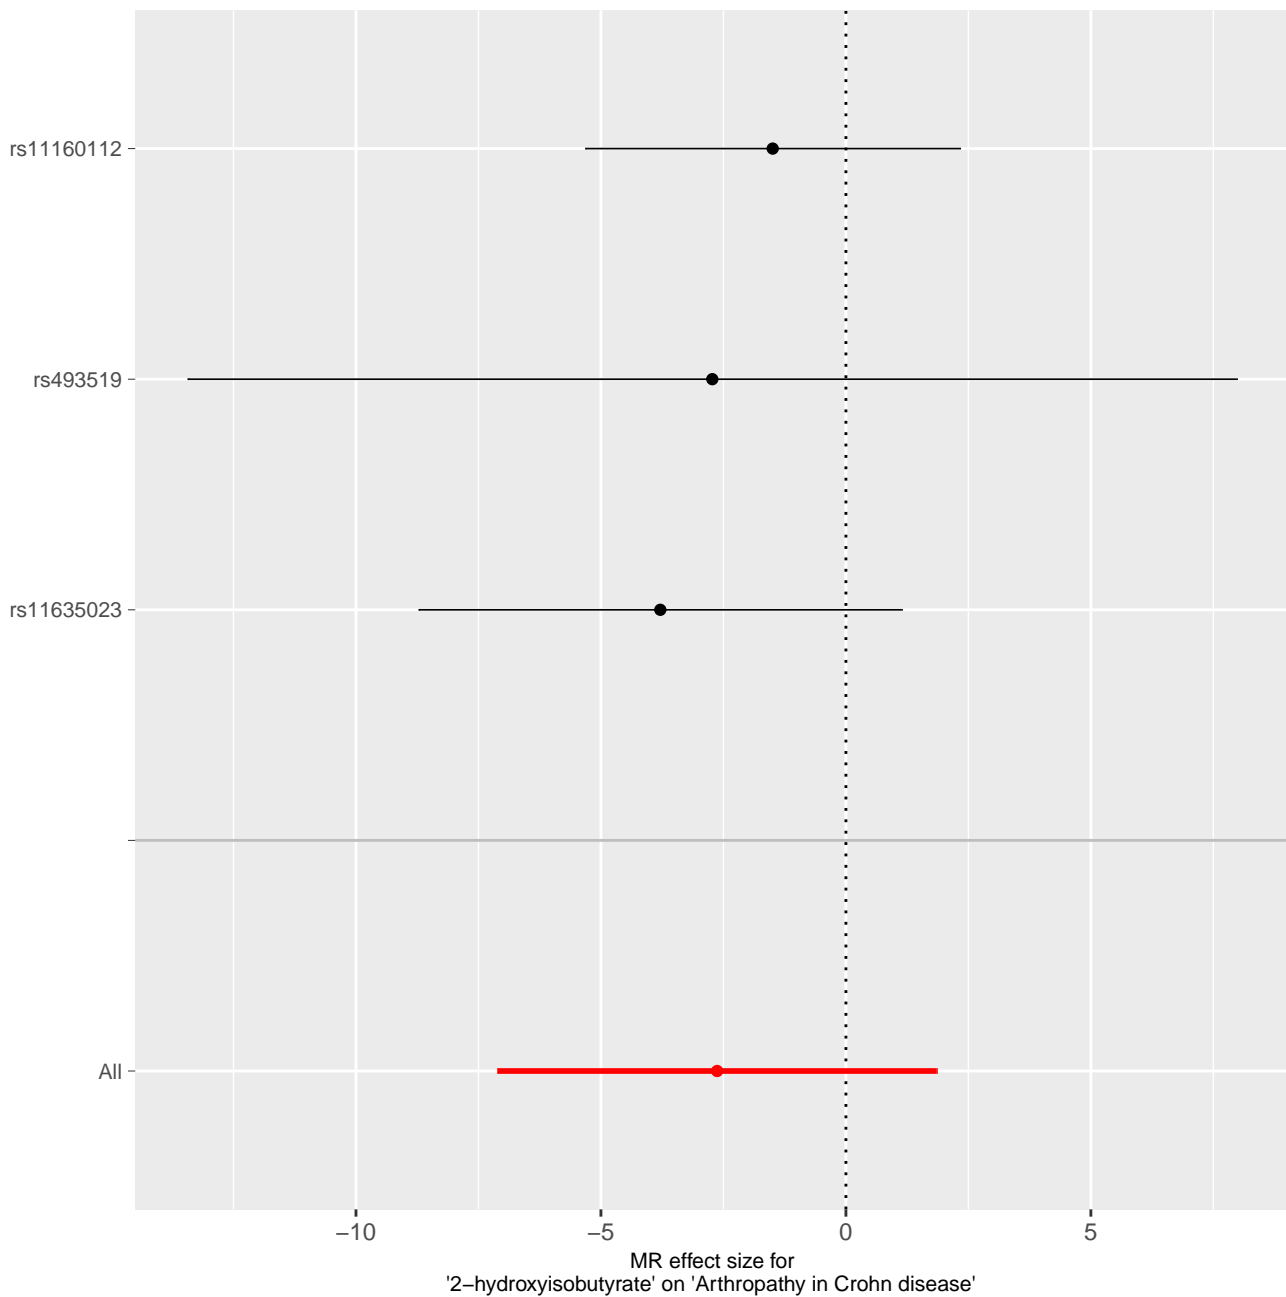

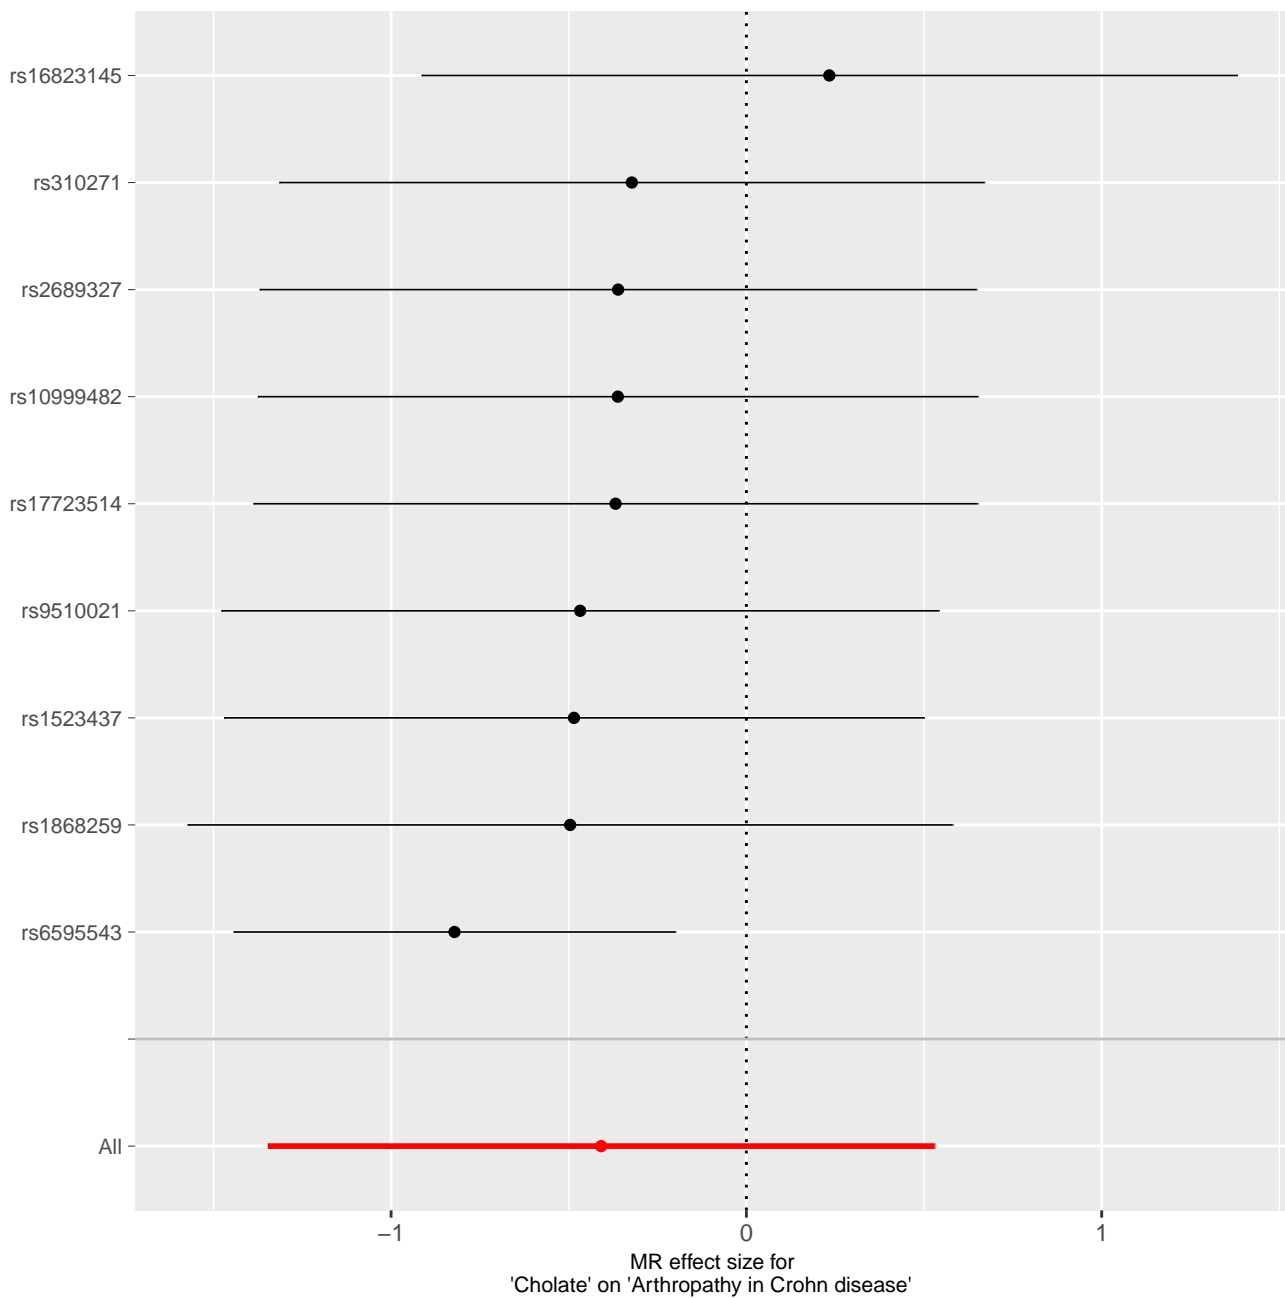

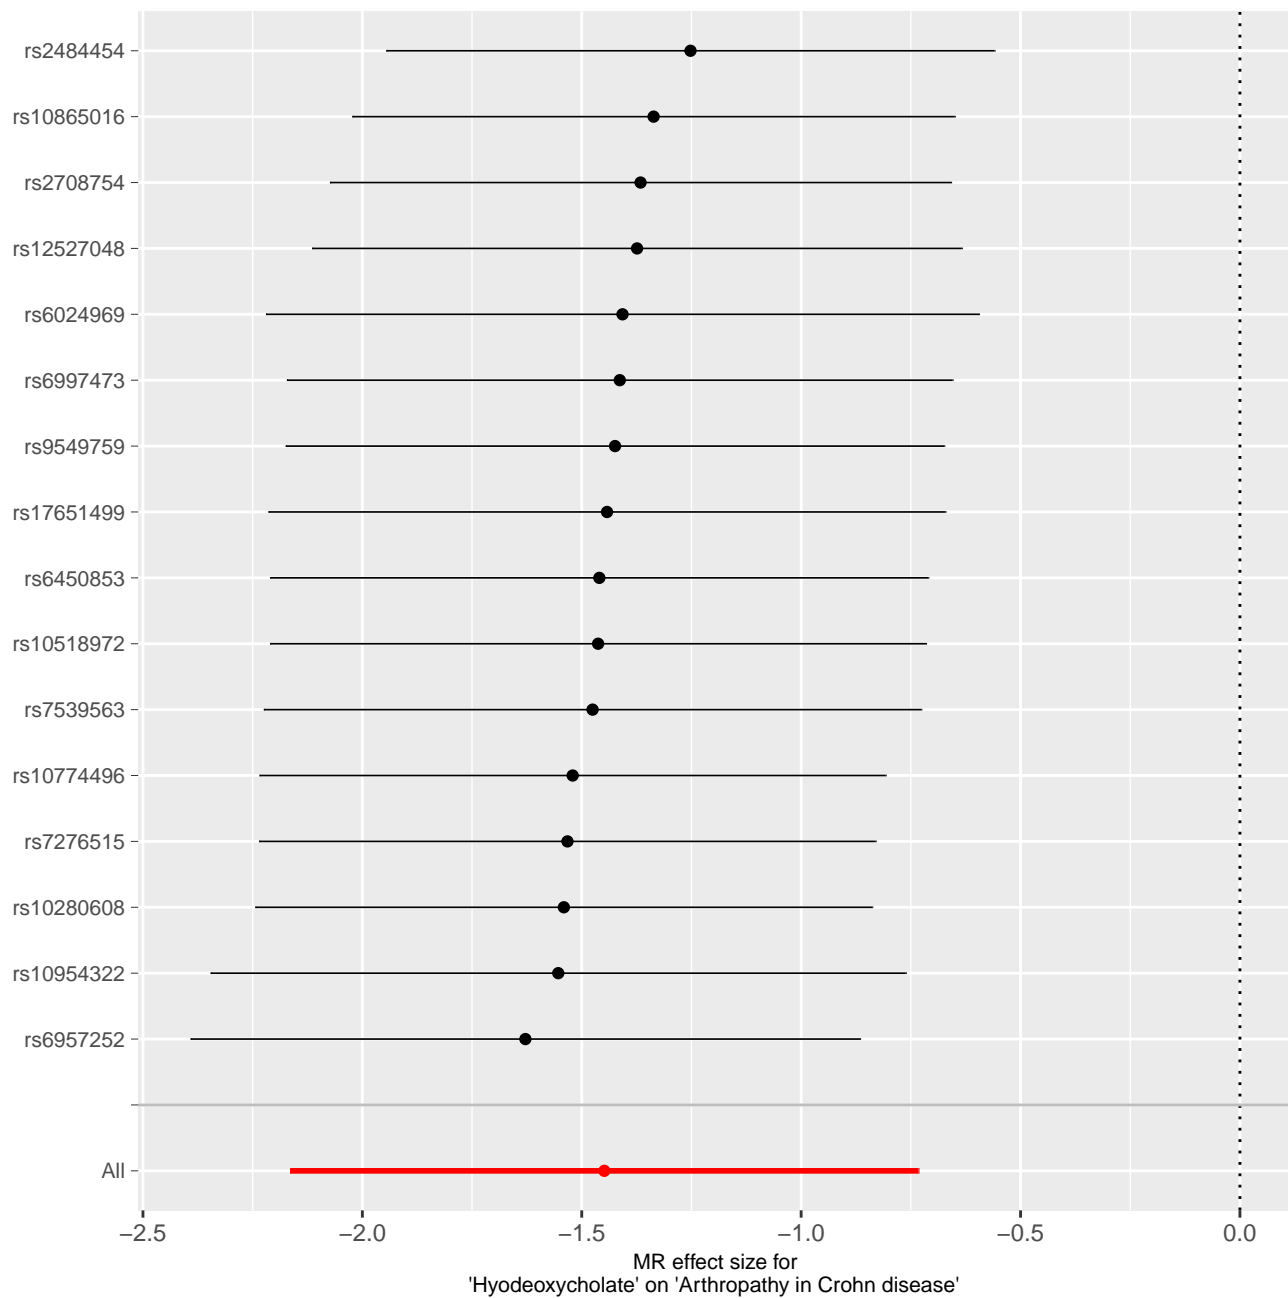

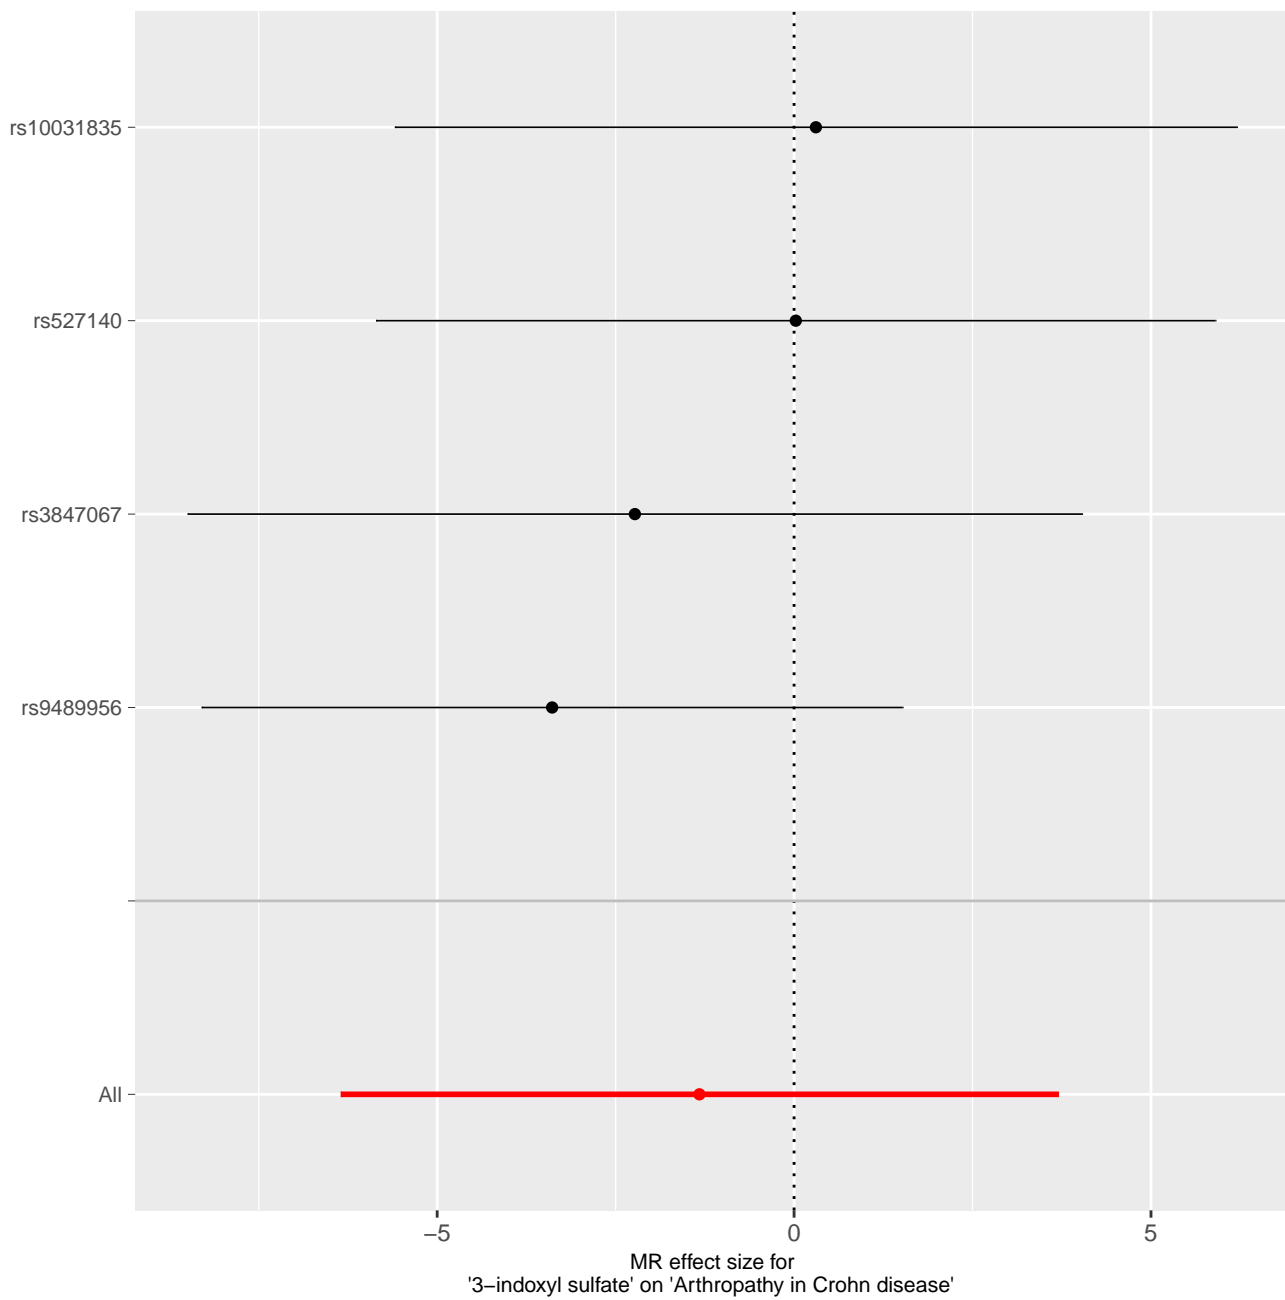



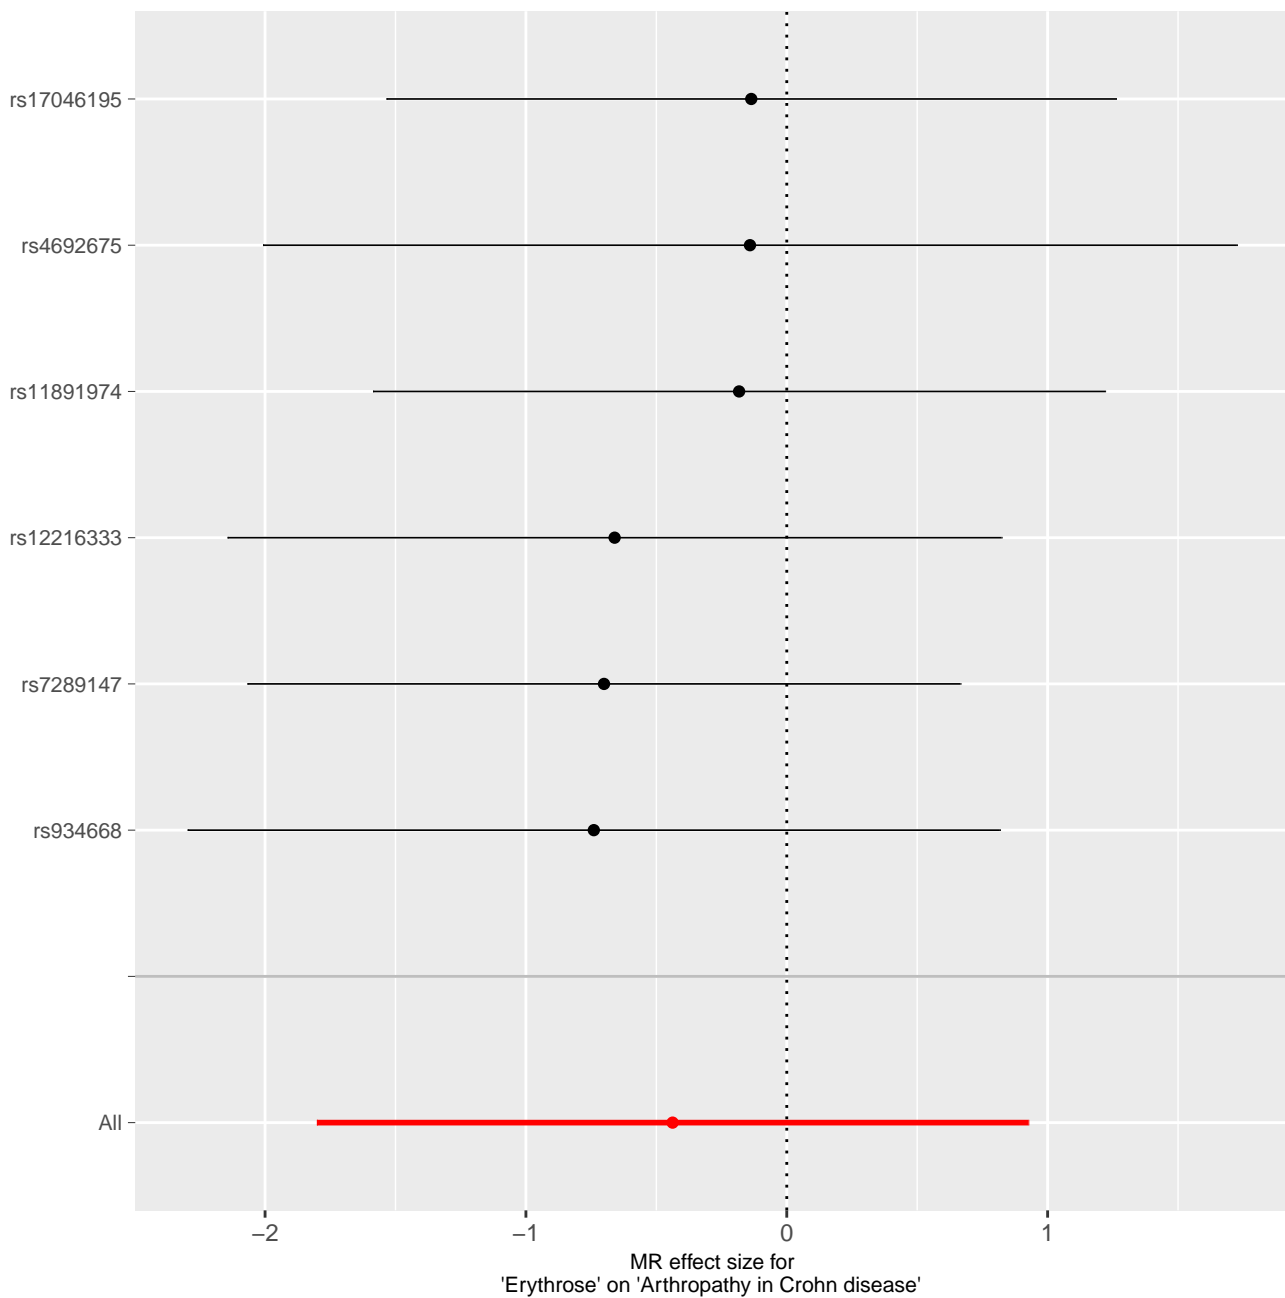

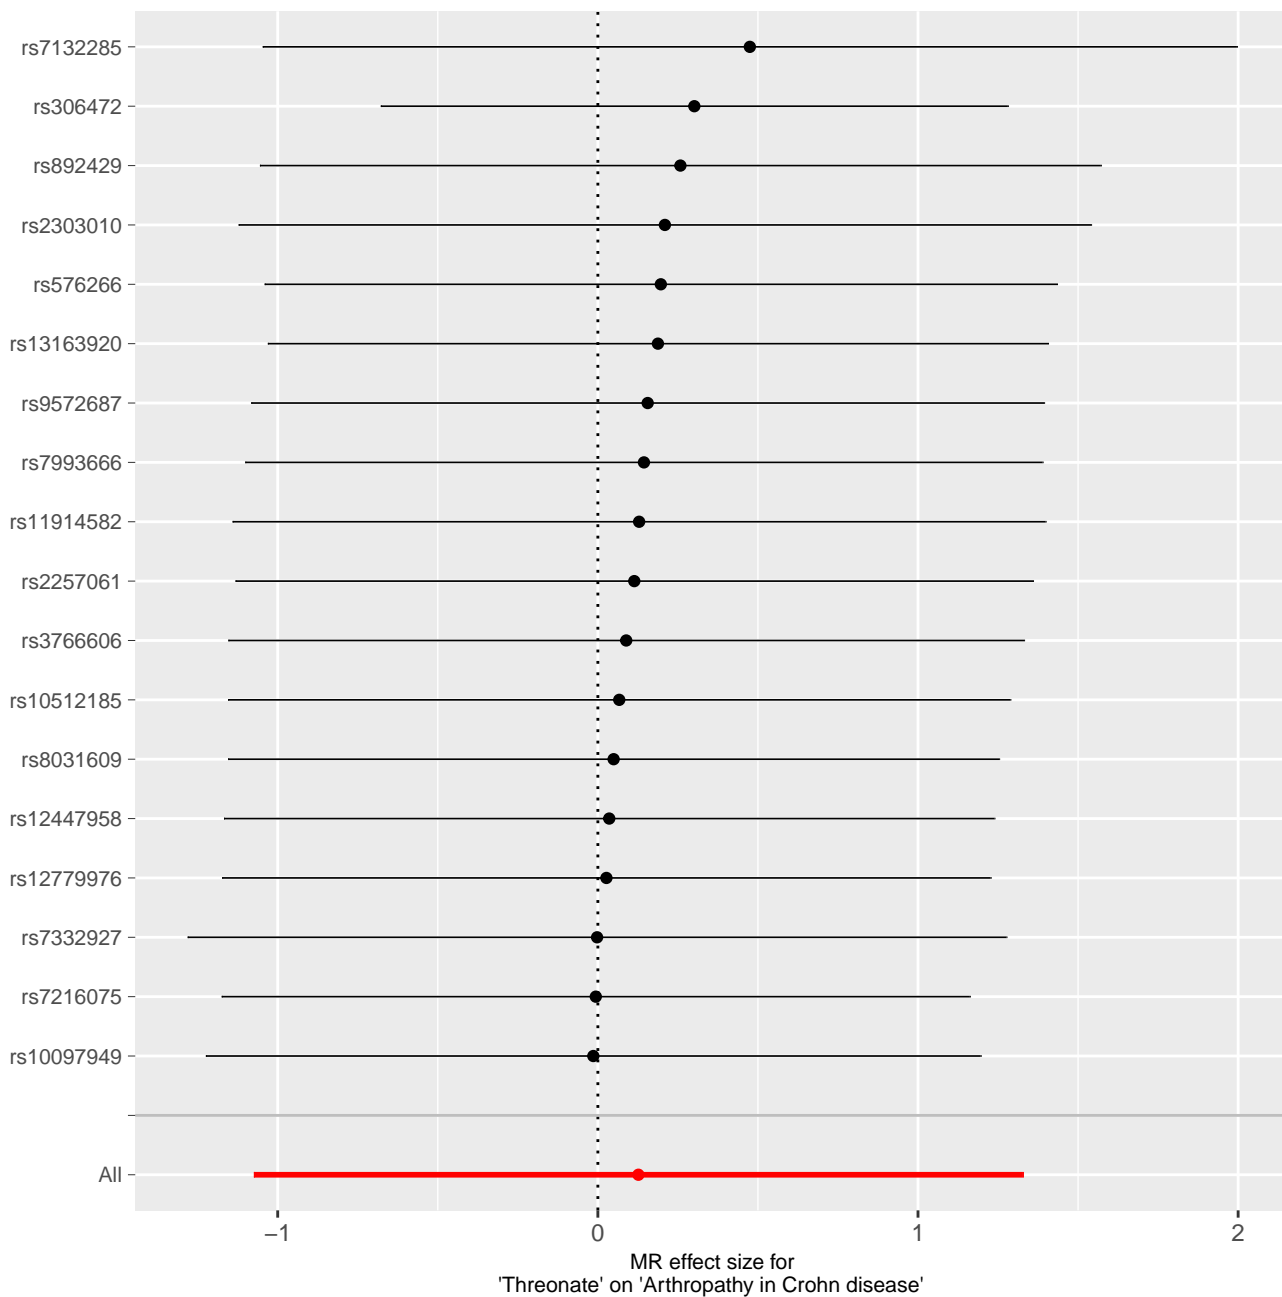

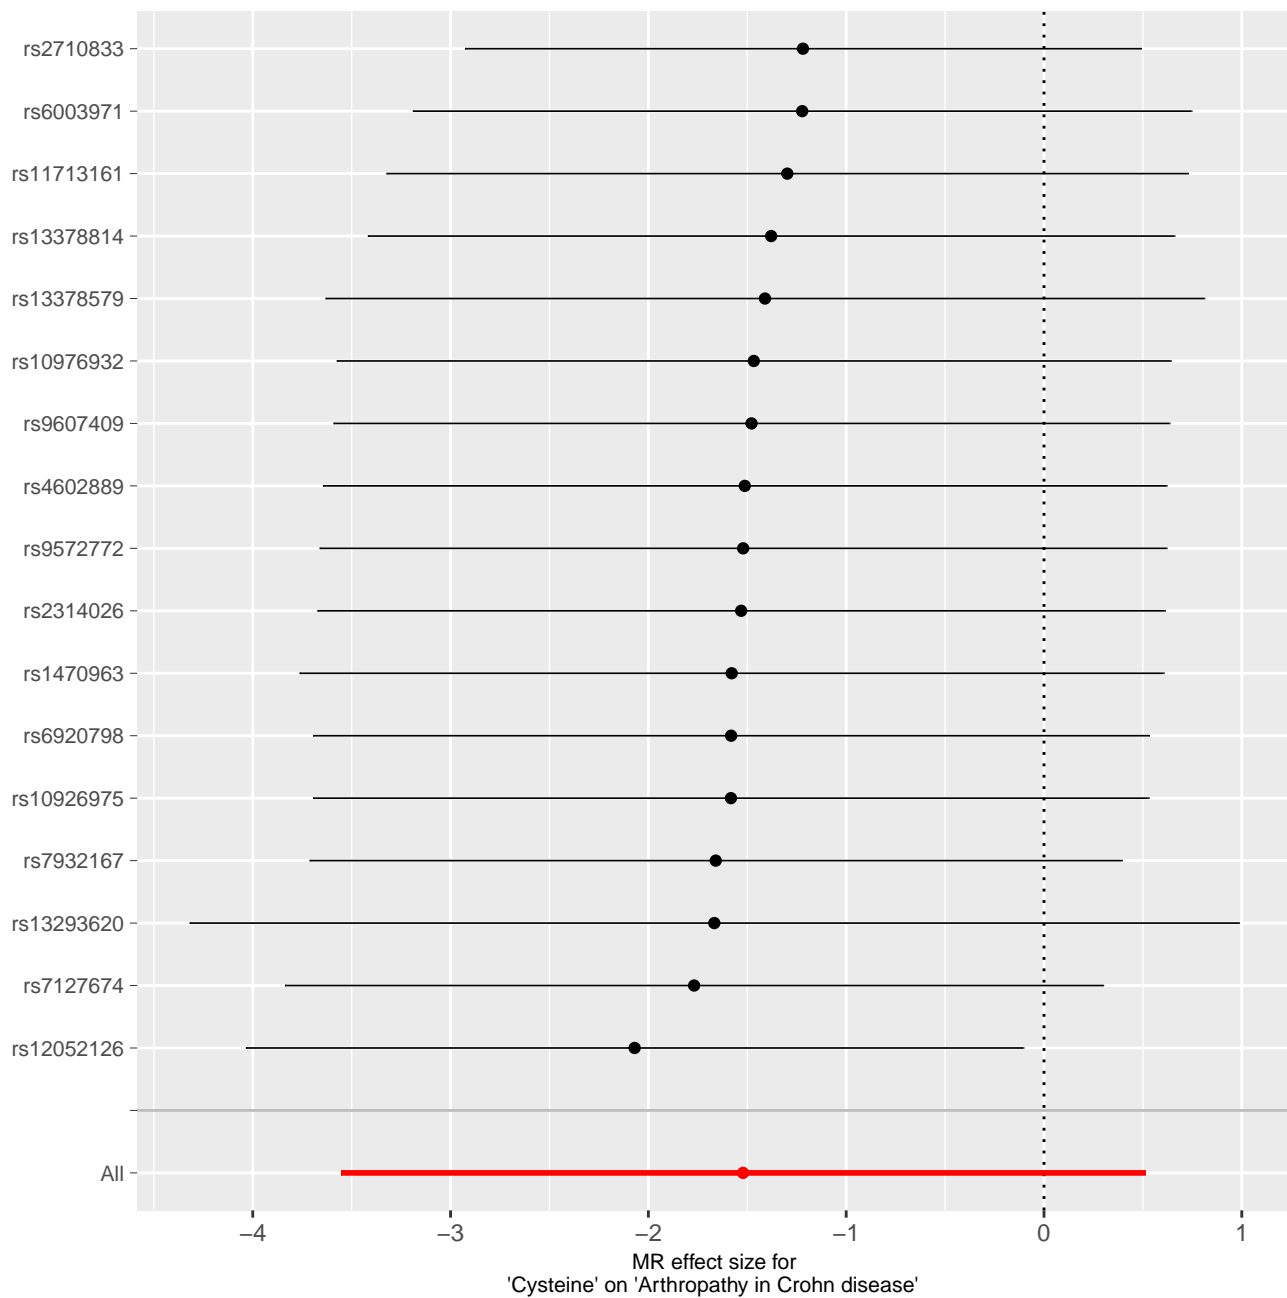

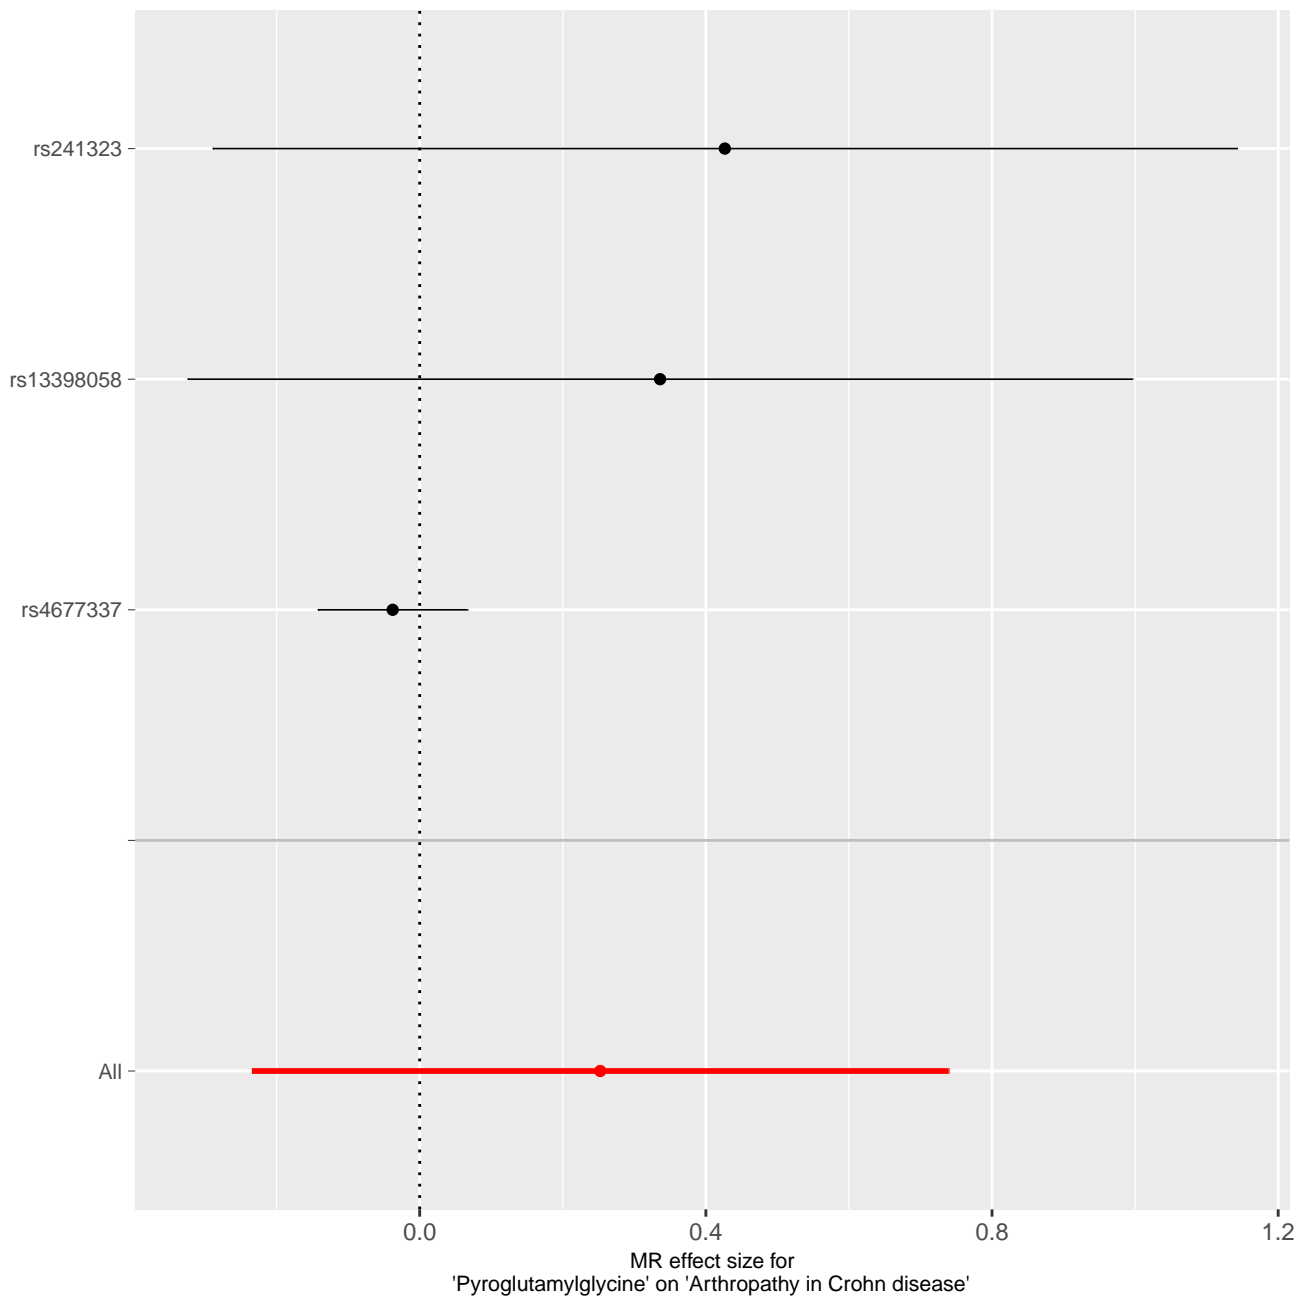

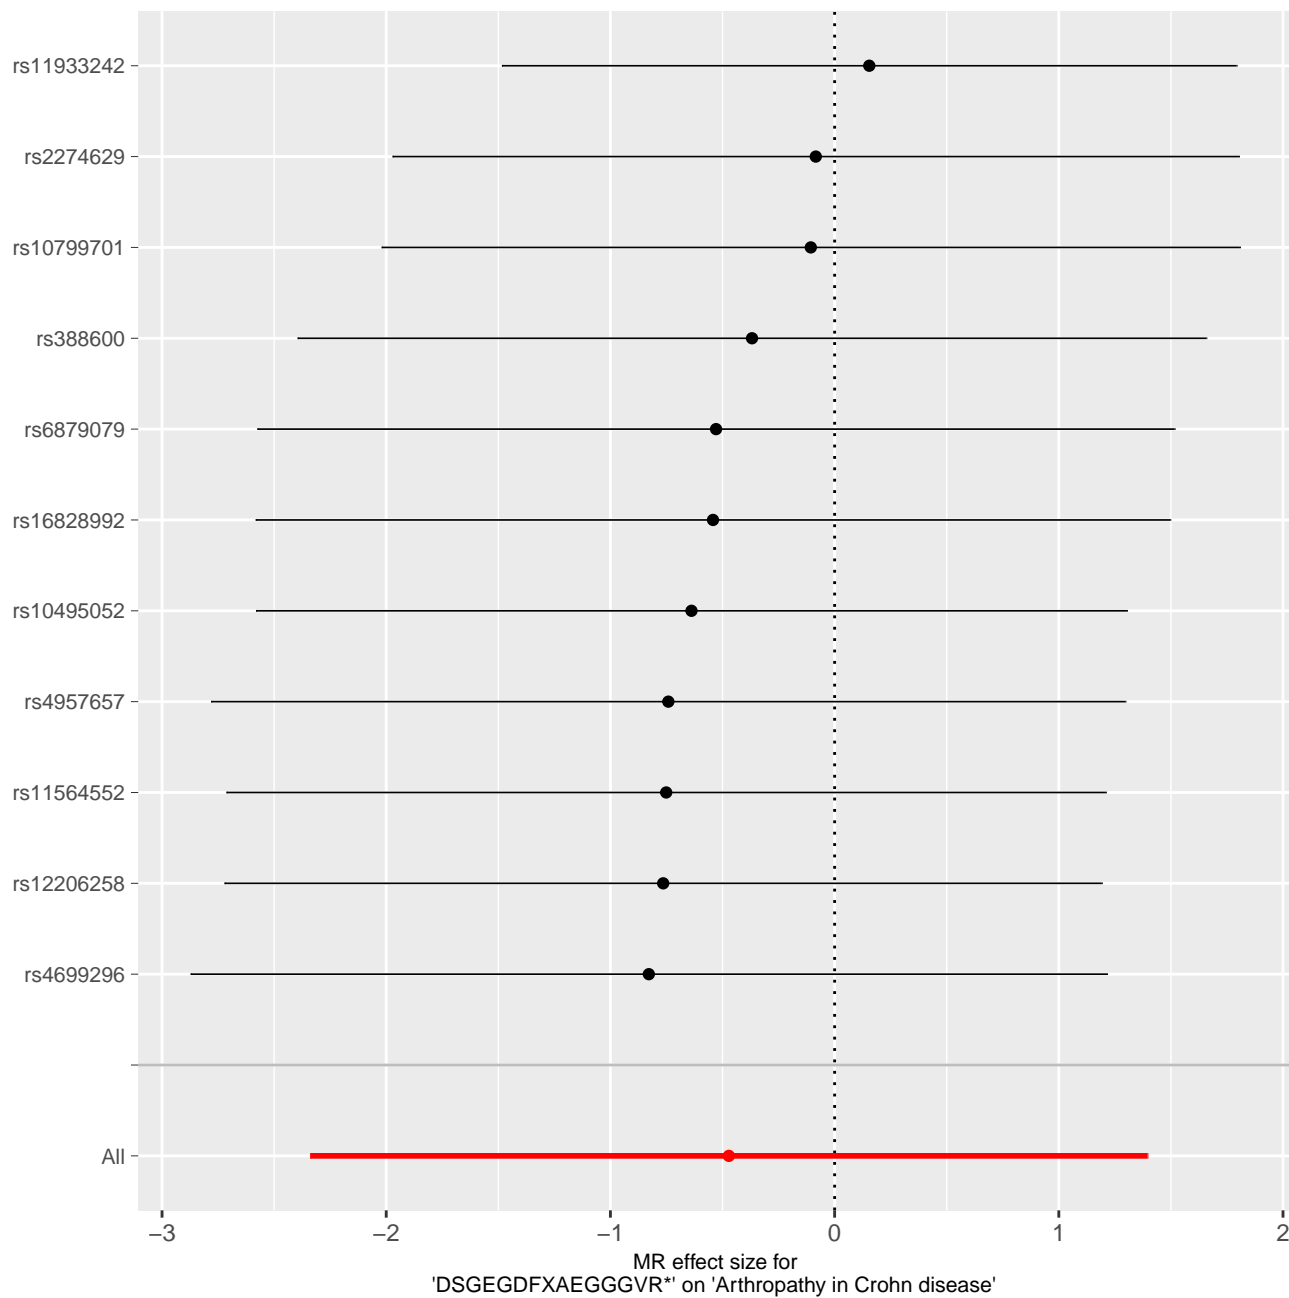

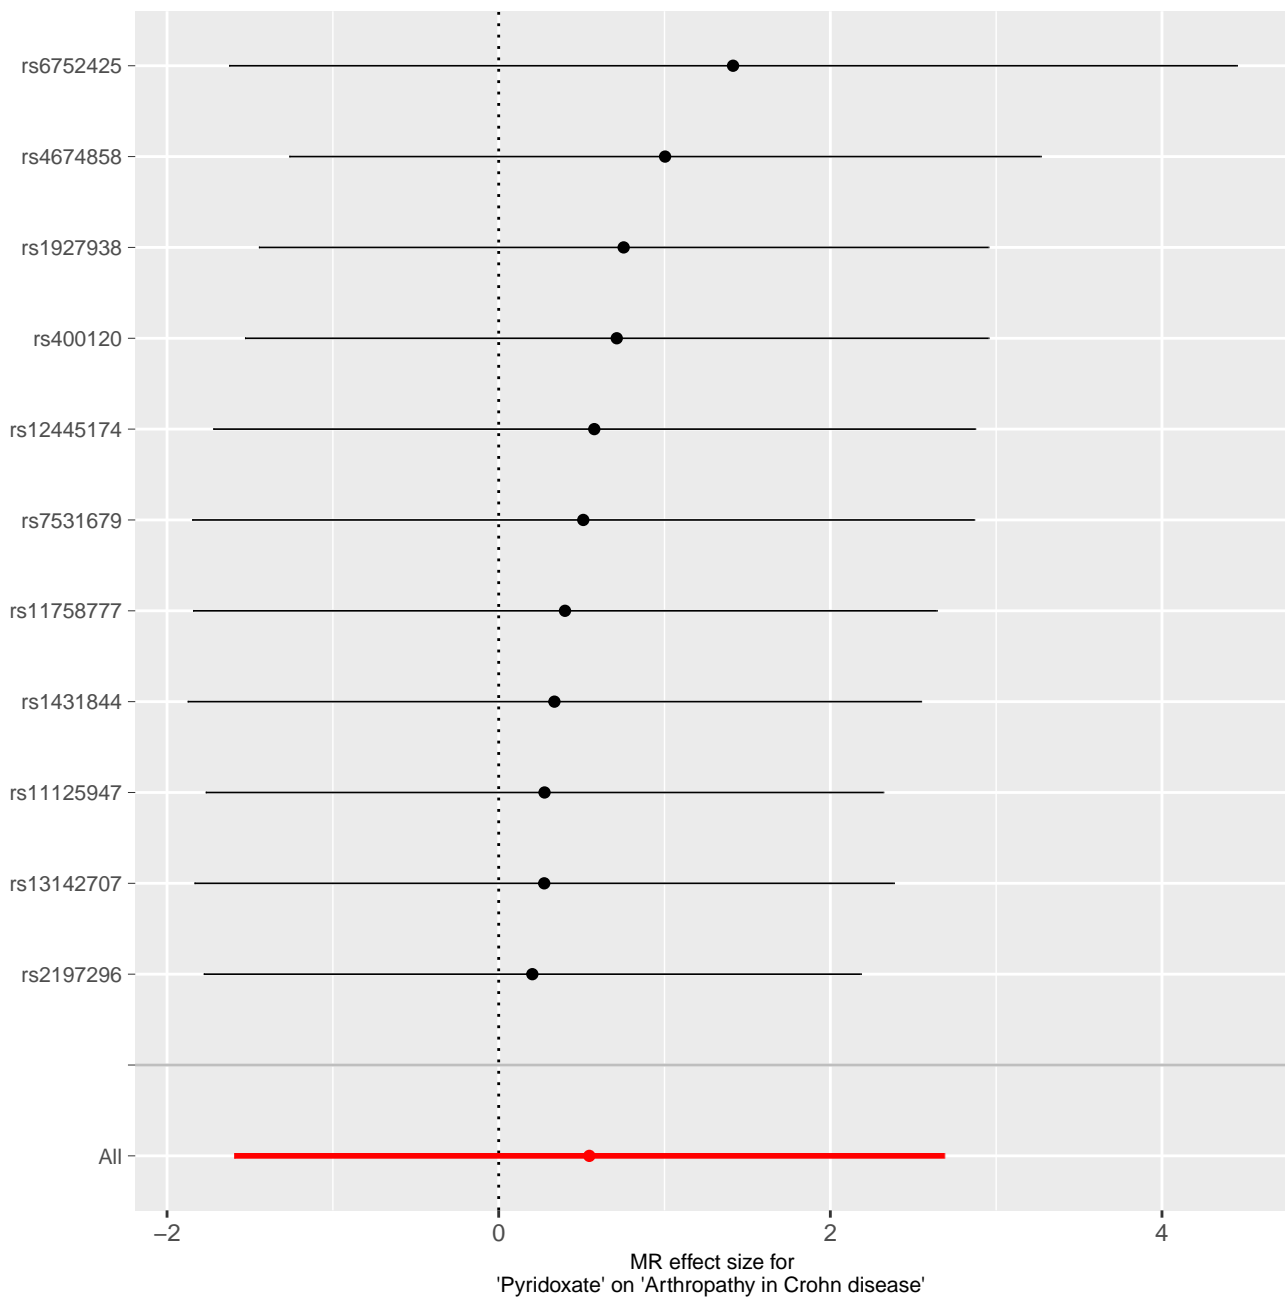

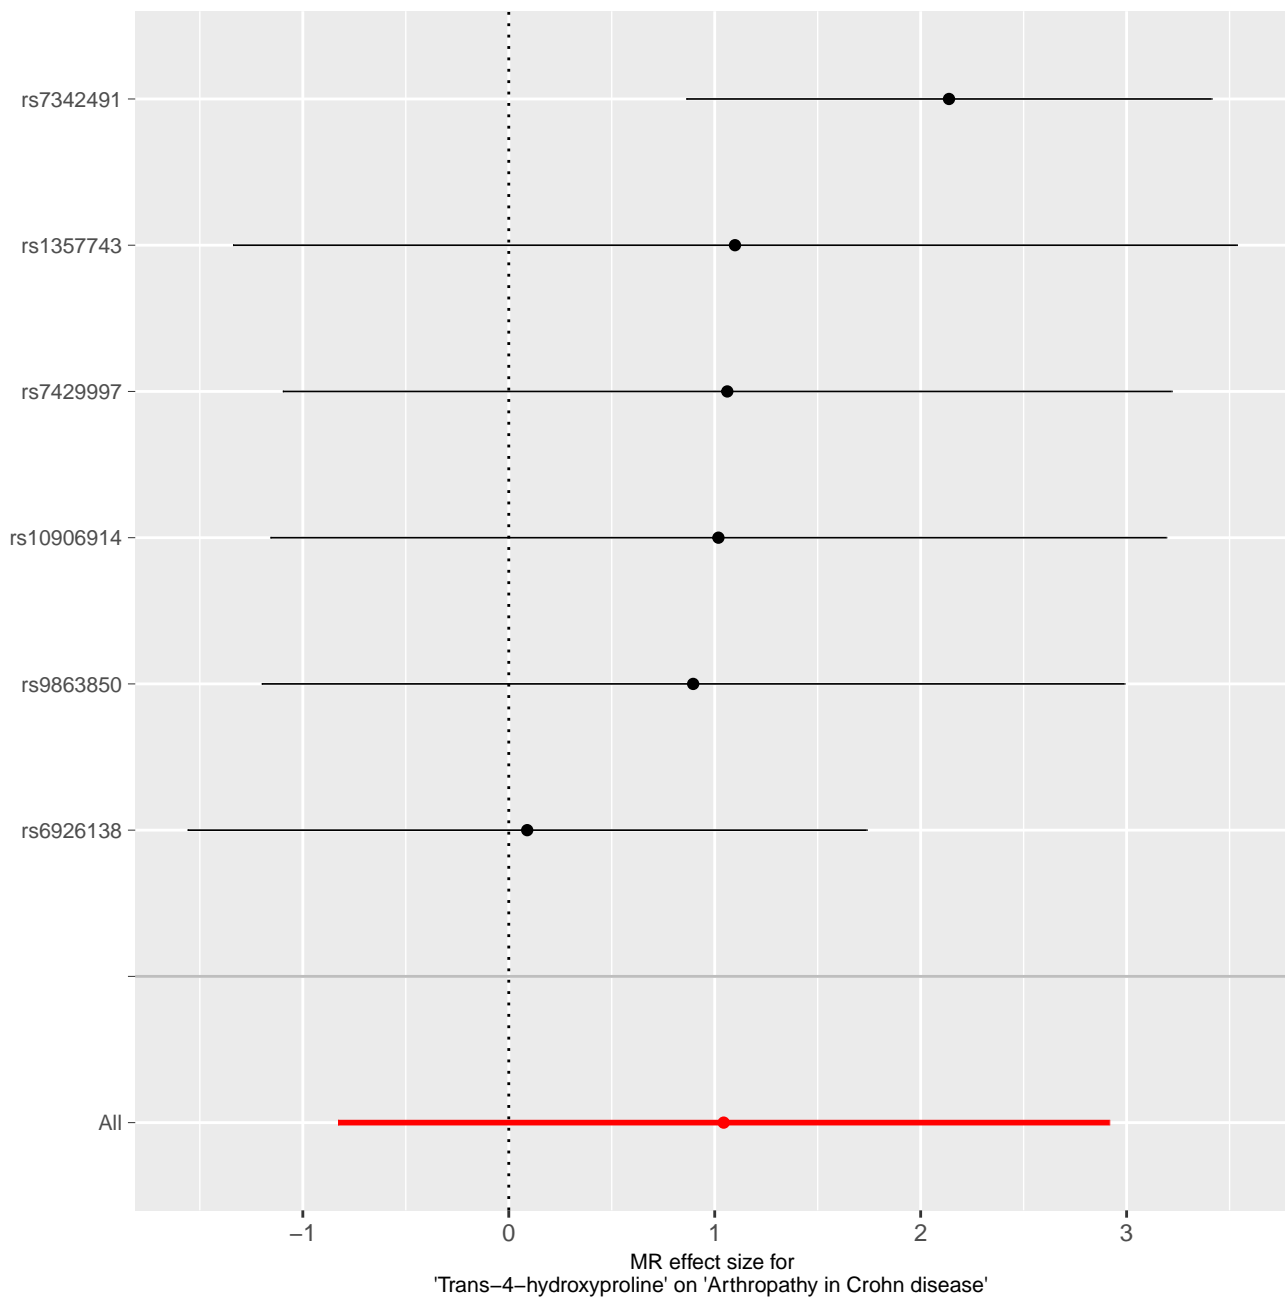

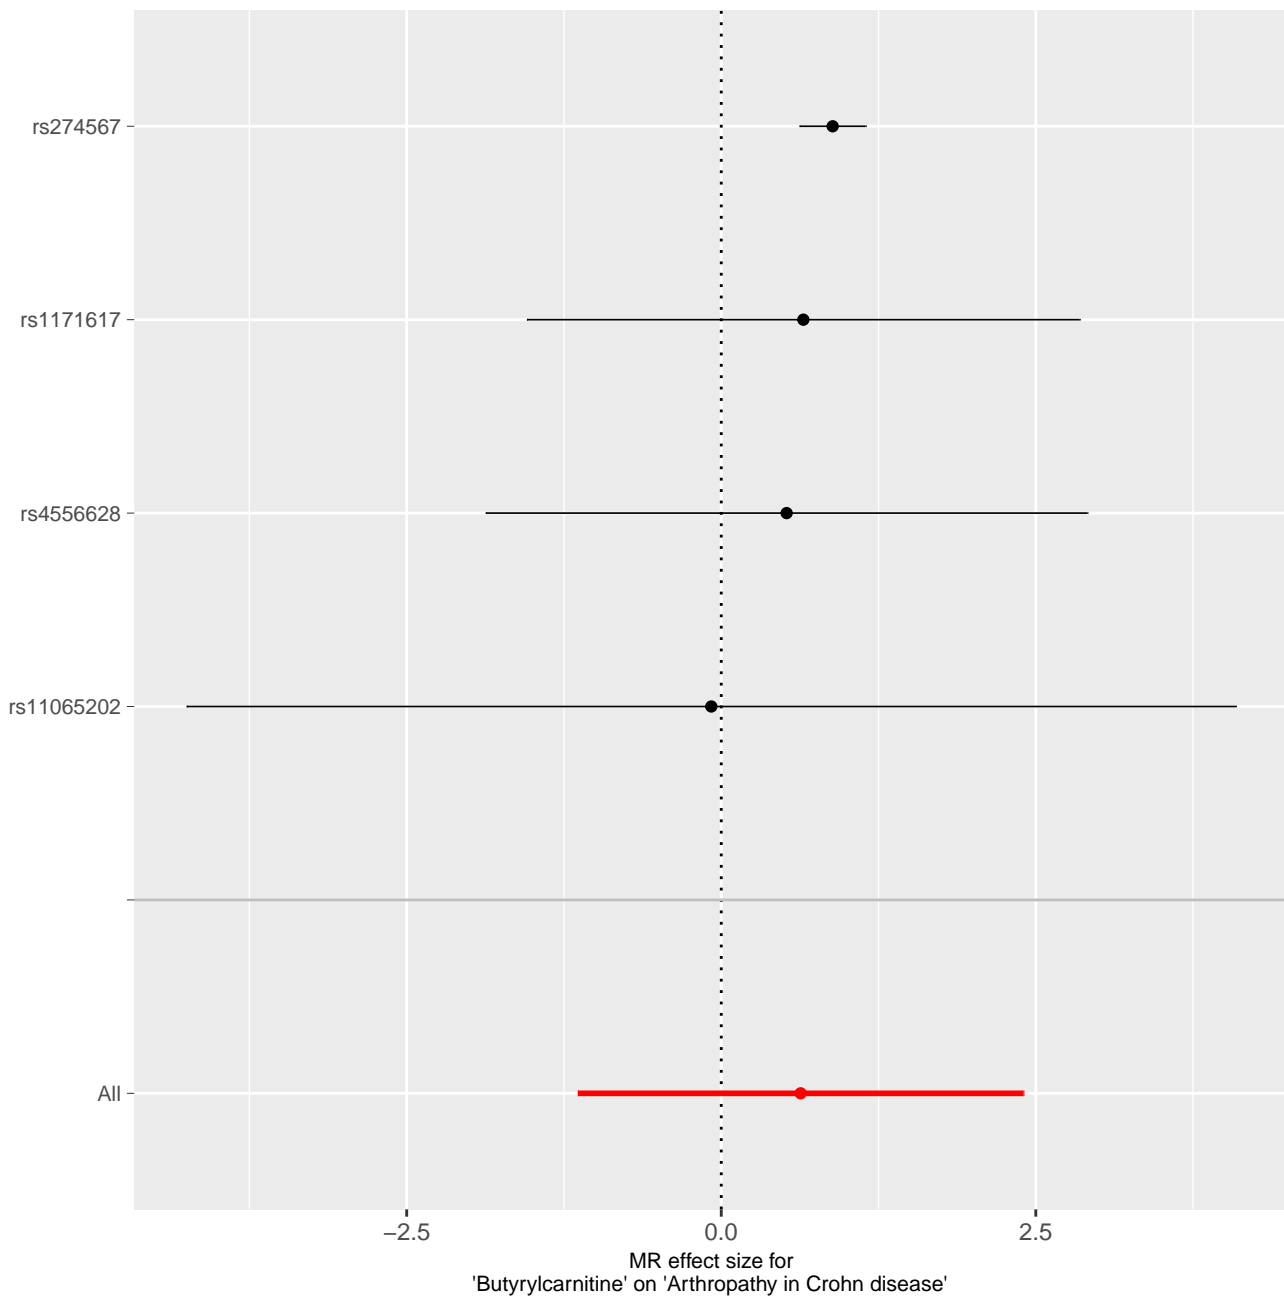



Batch 973 : Caproate (6:0) on Arthropathy in Crohn disease

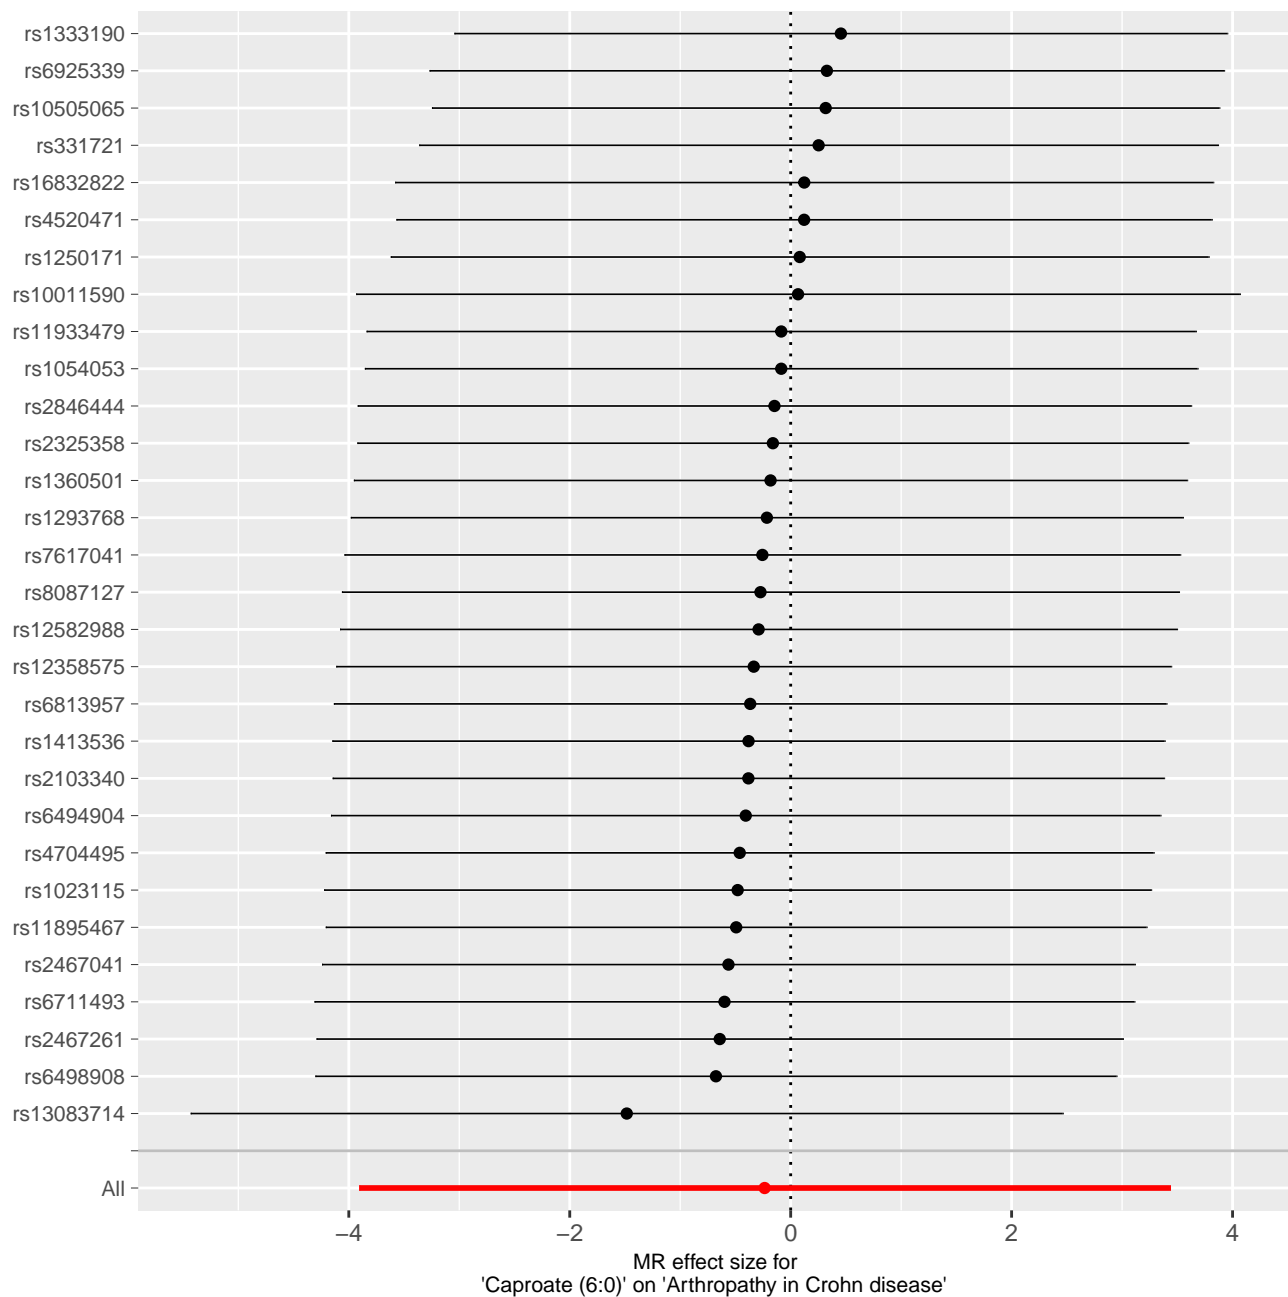

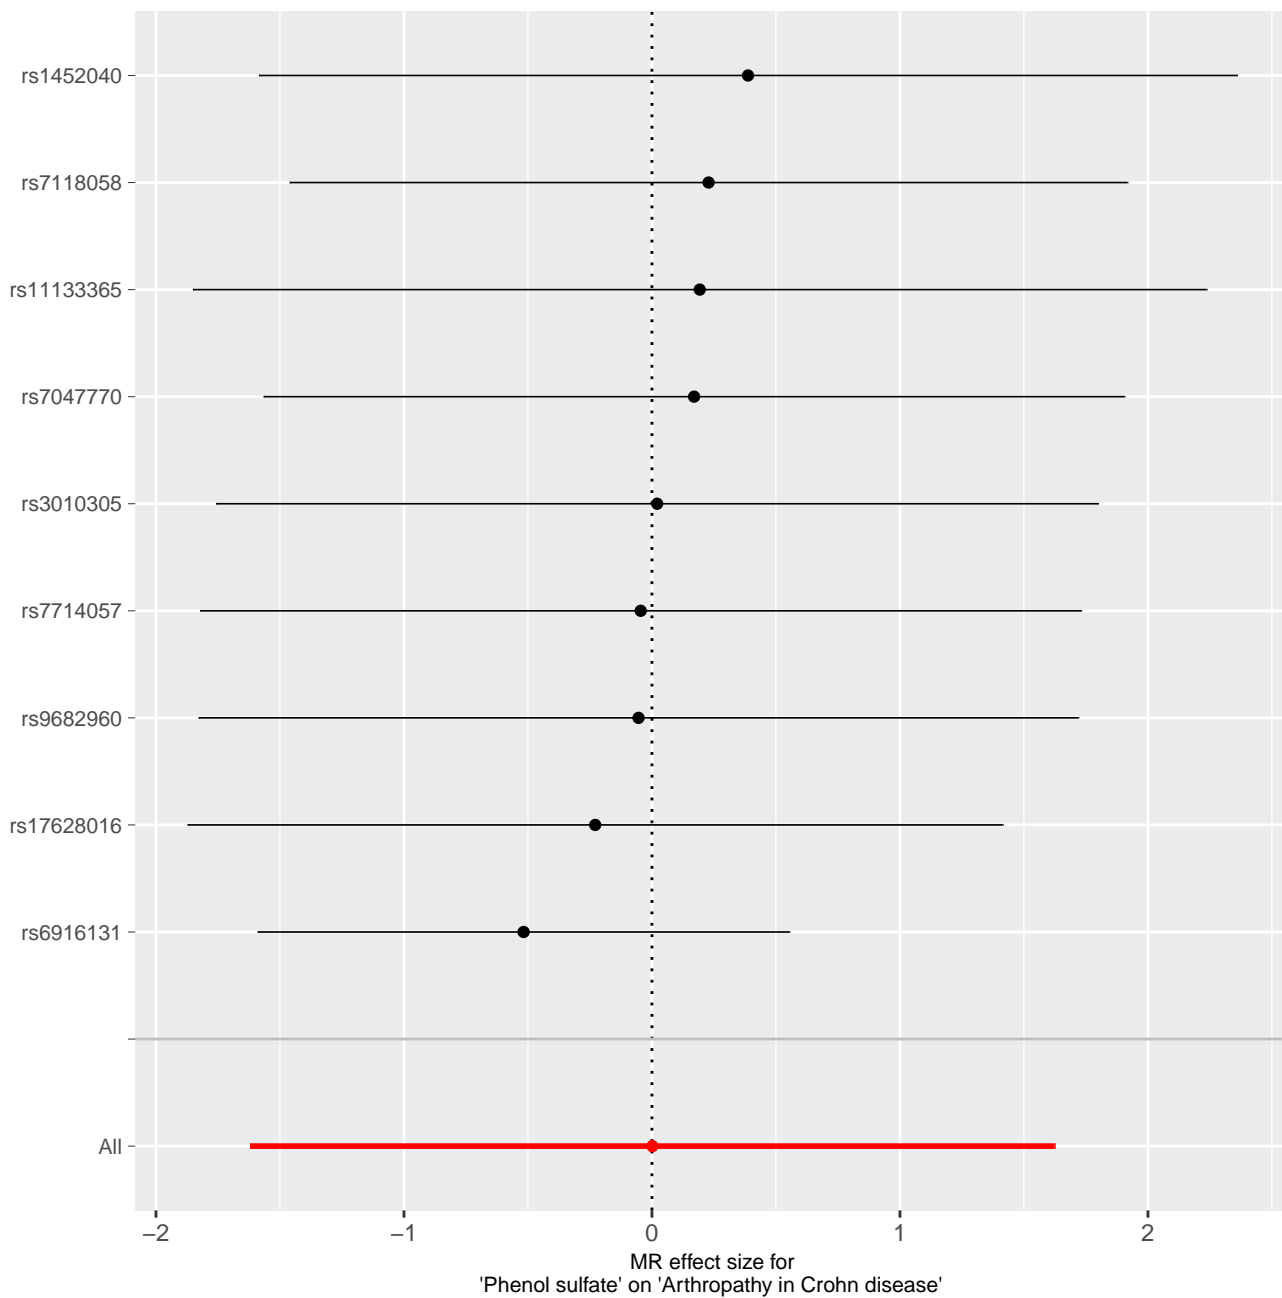

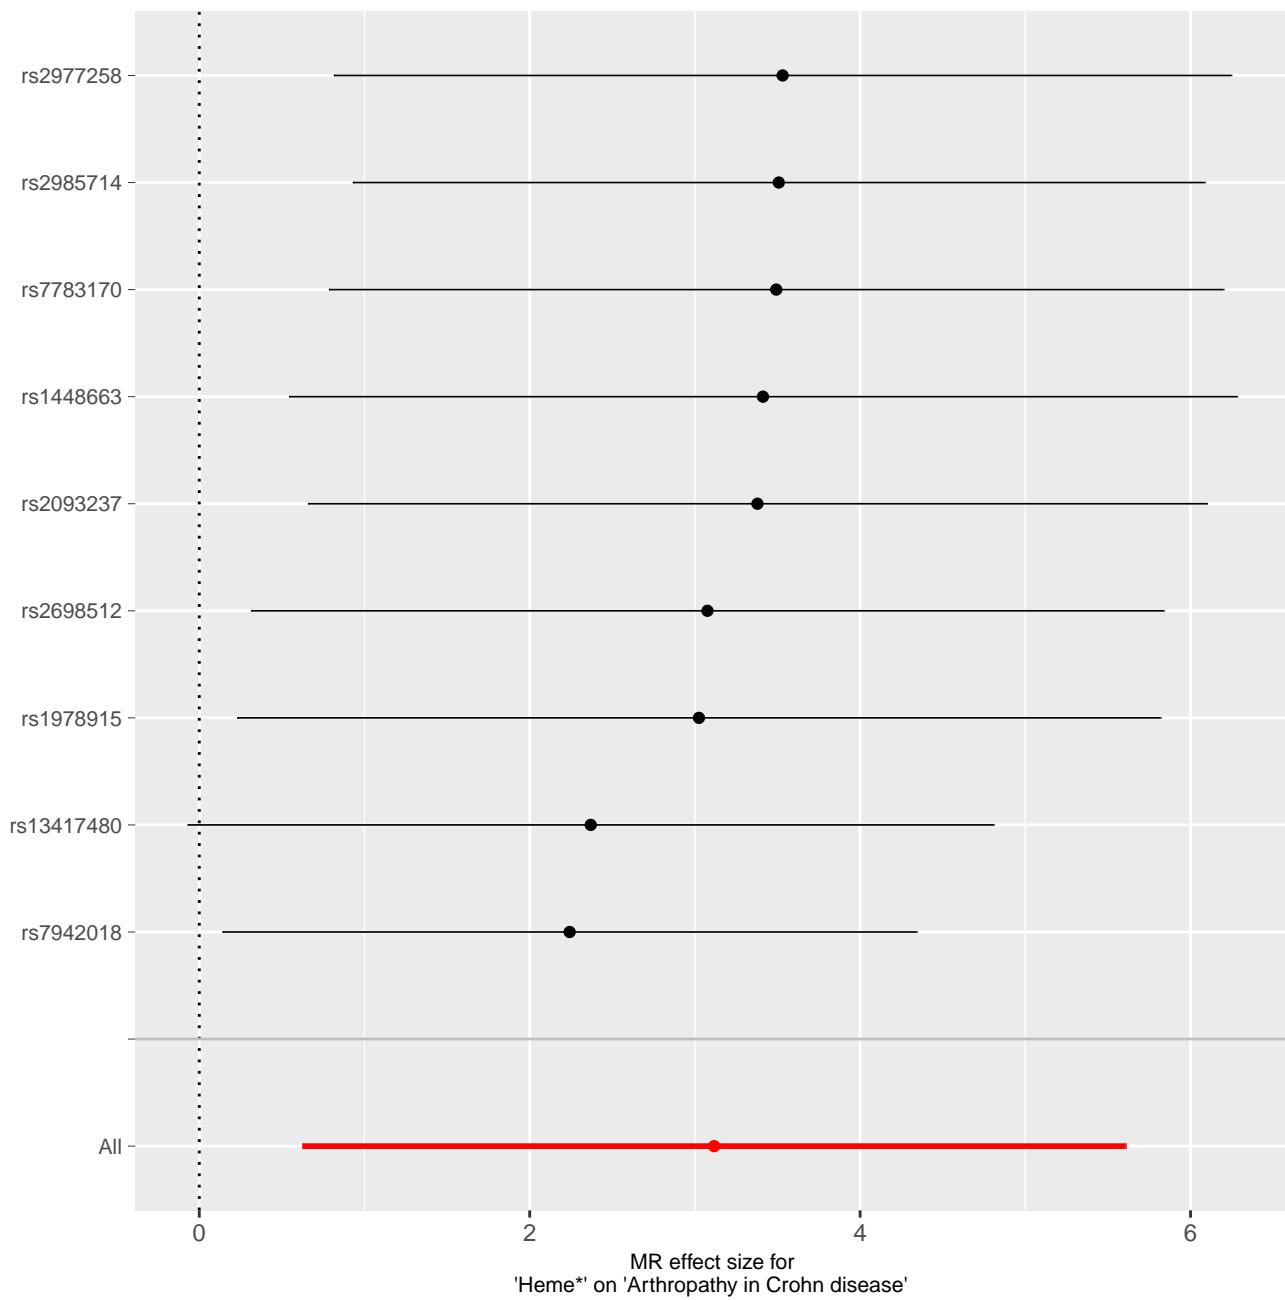

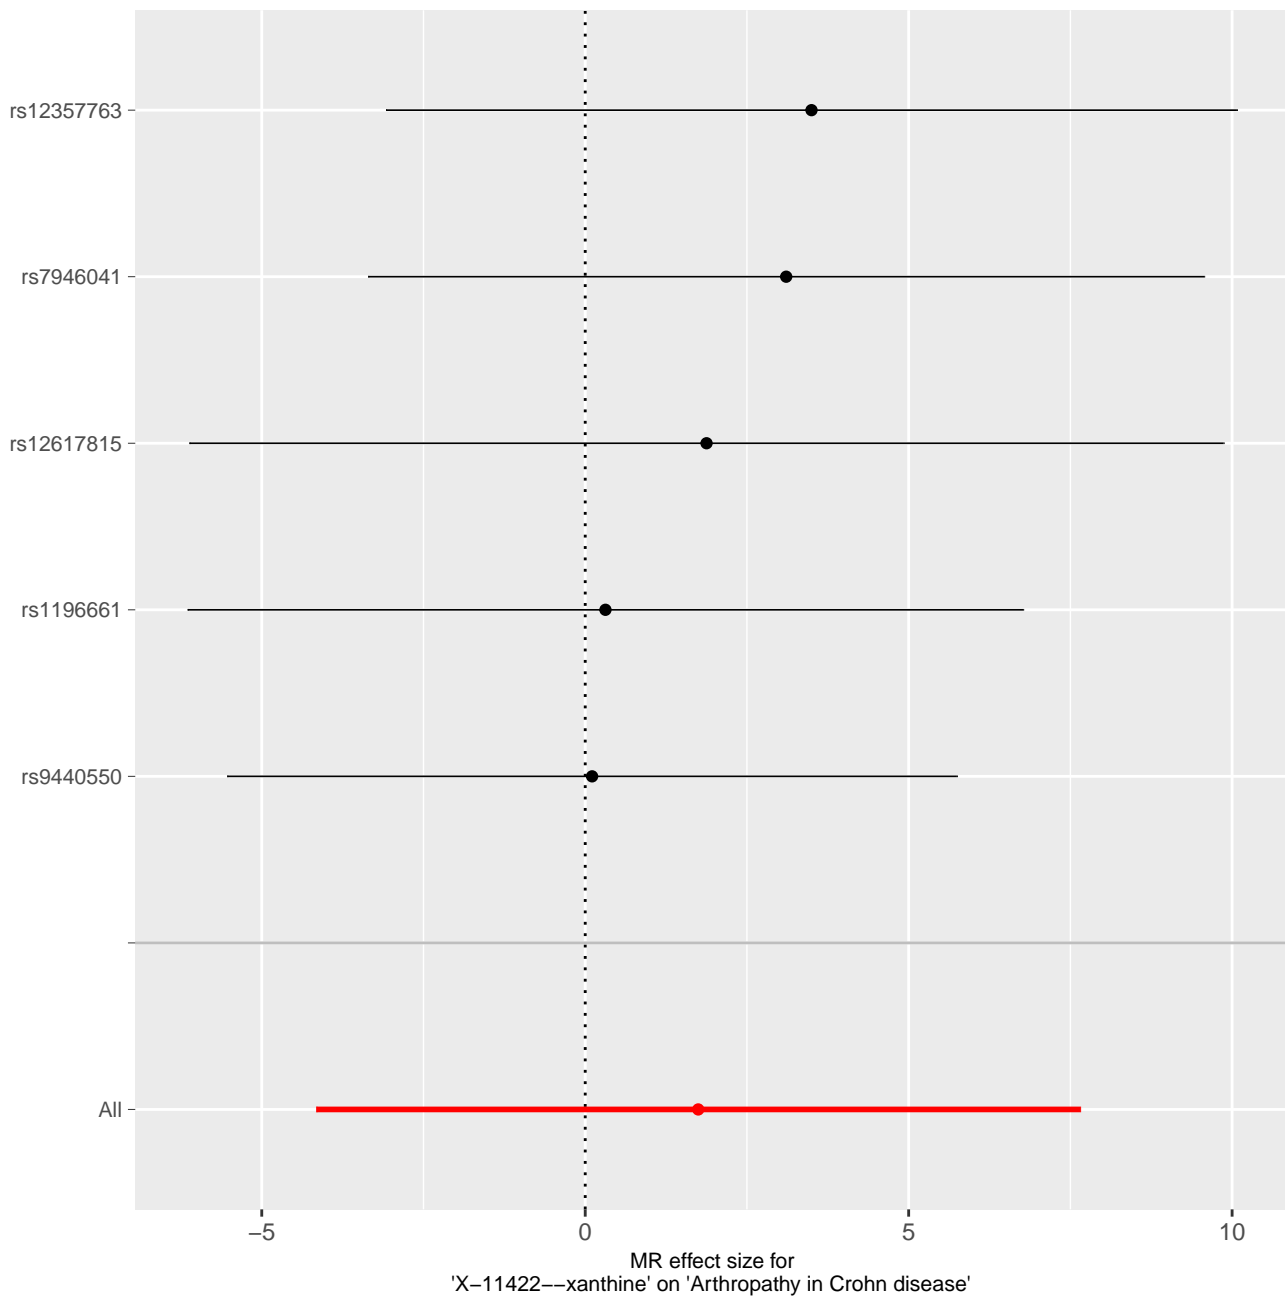

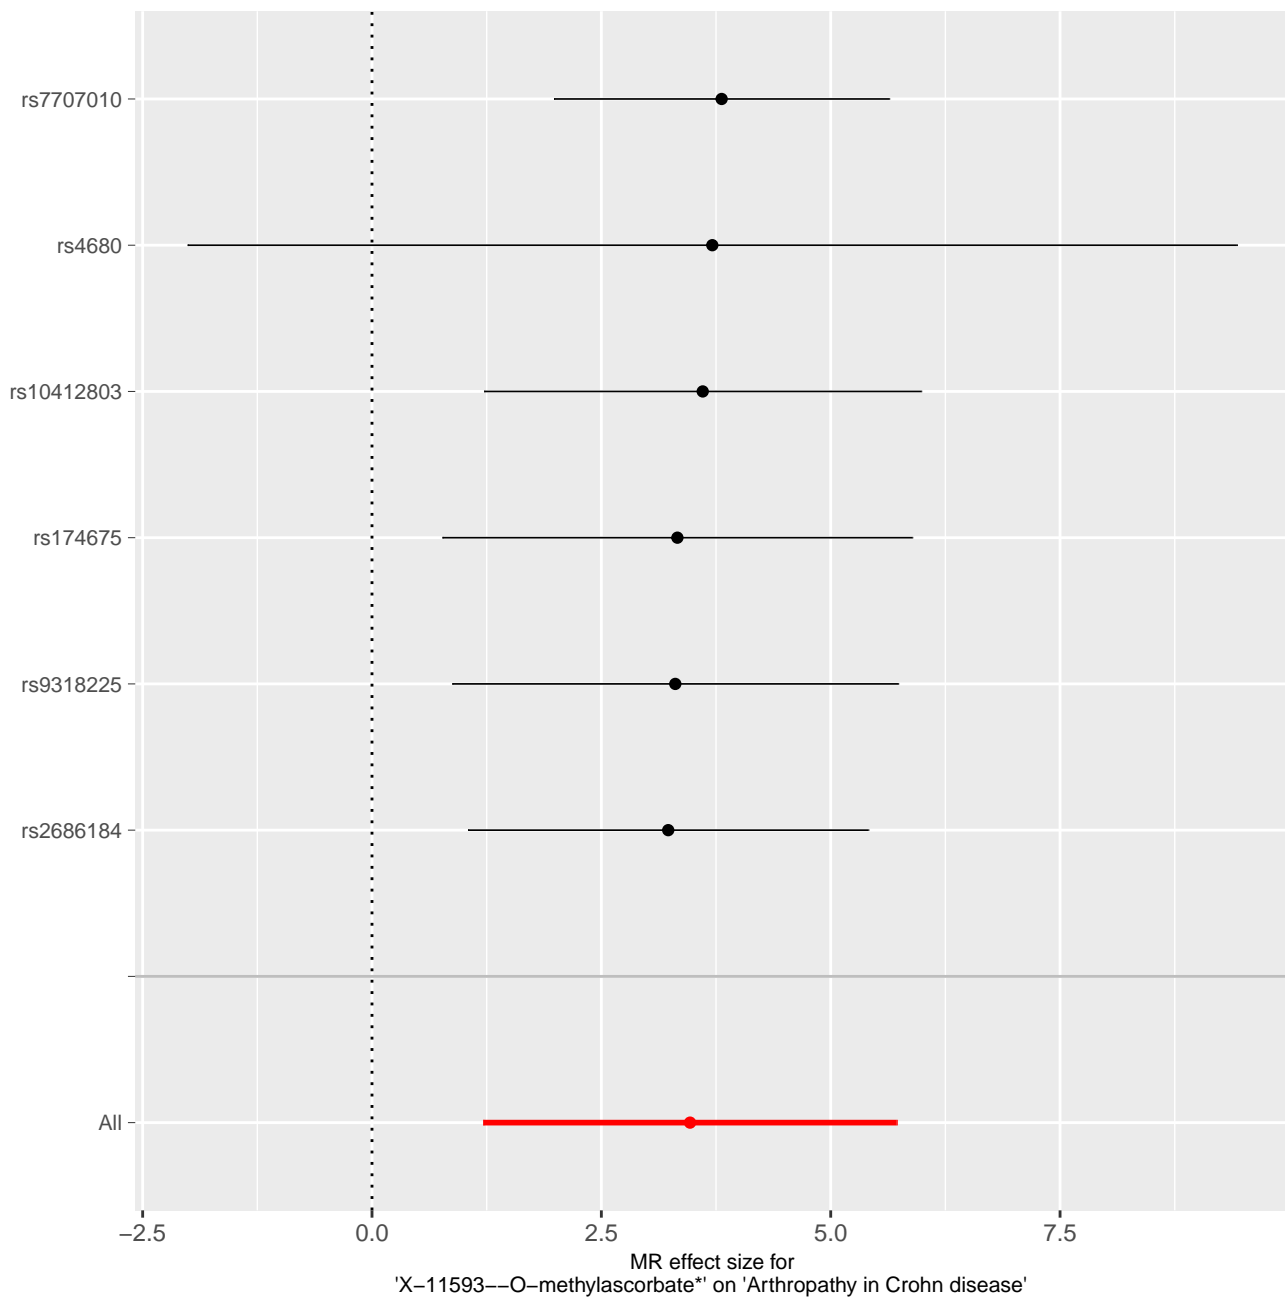

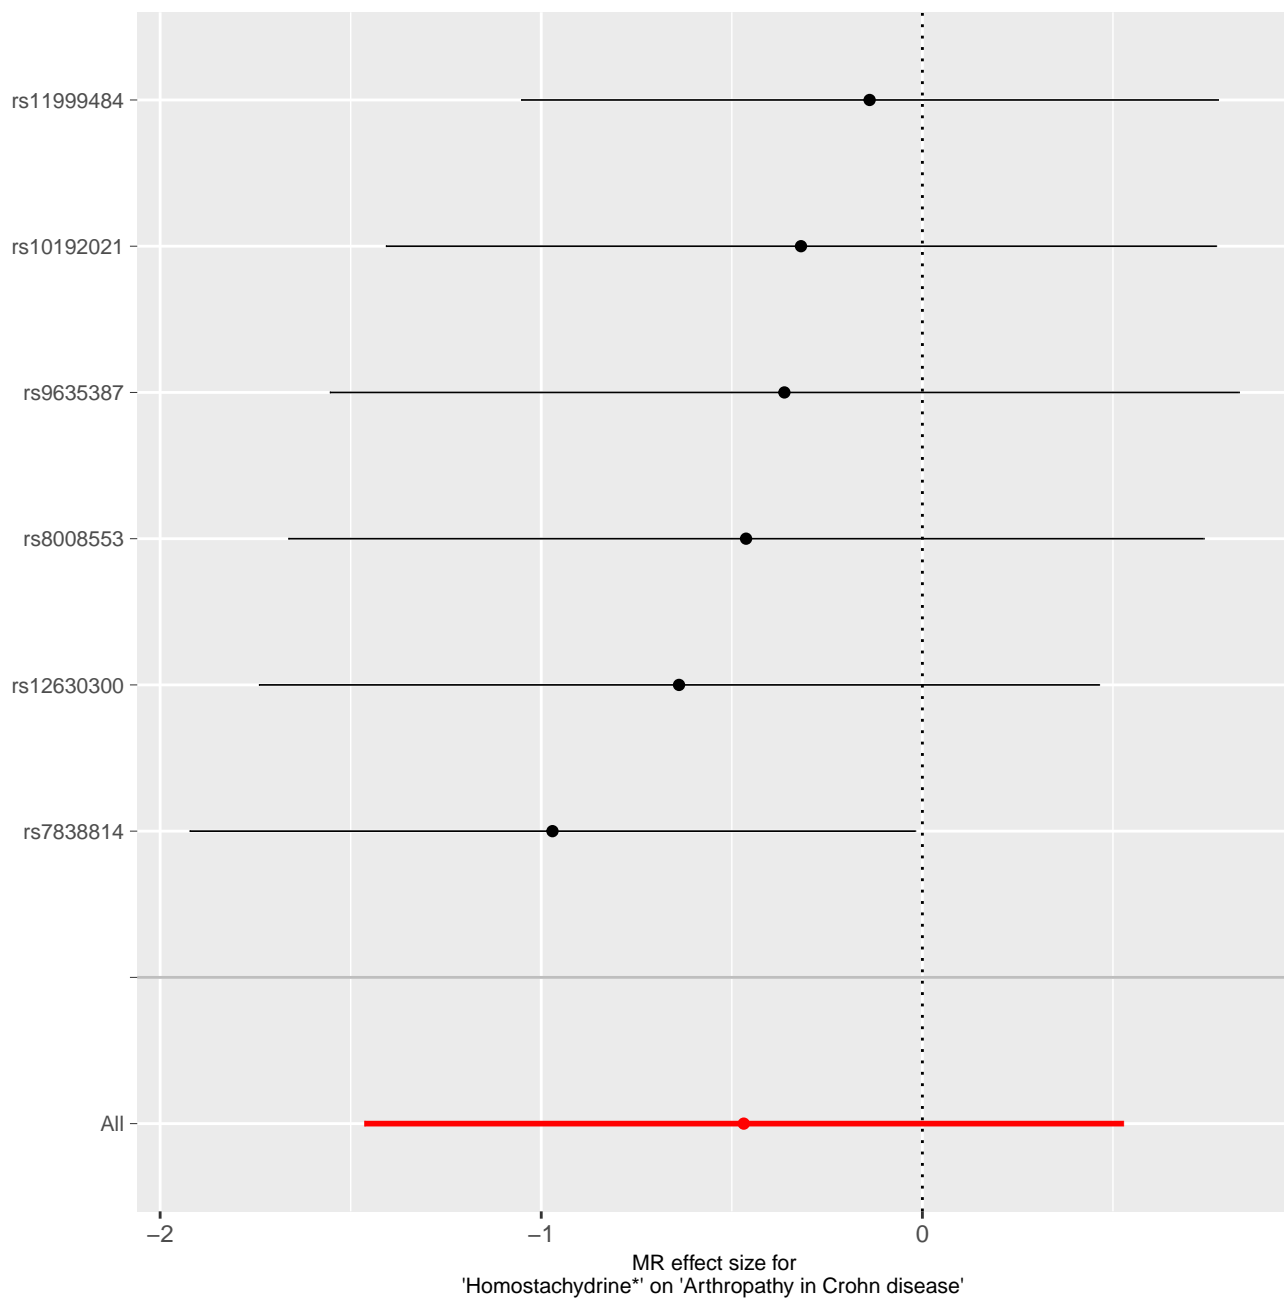

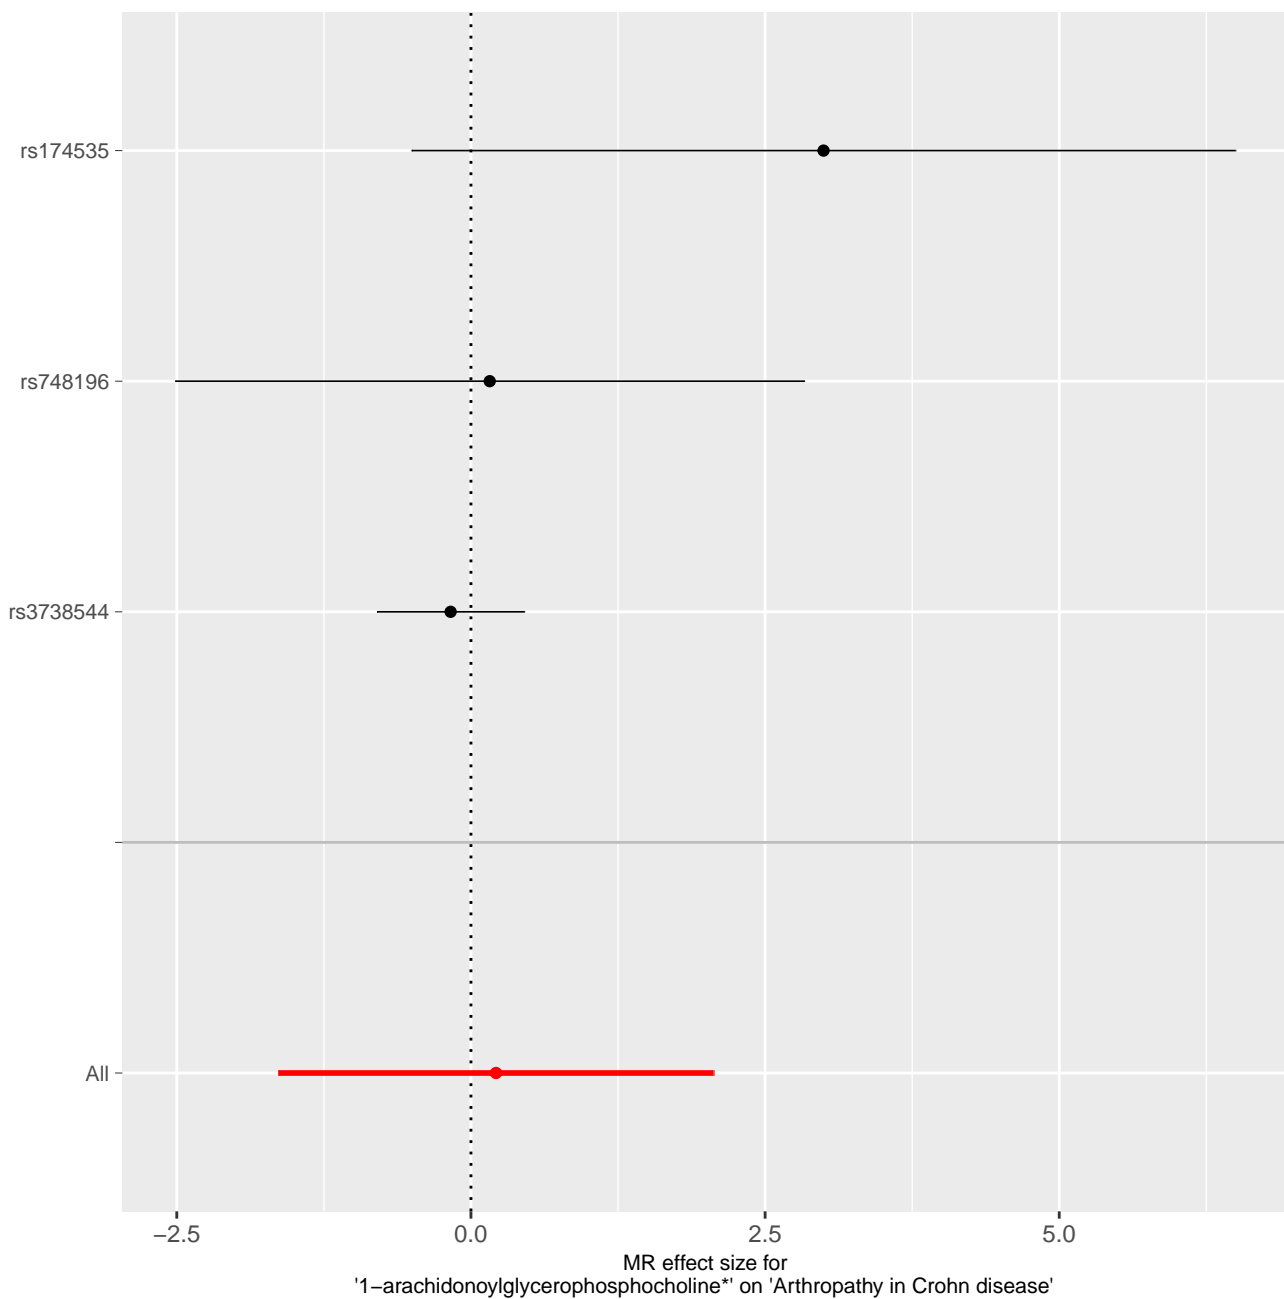

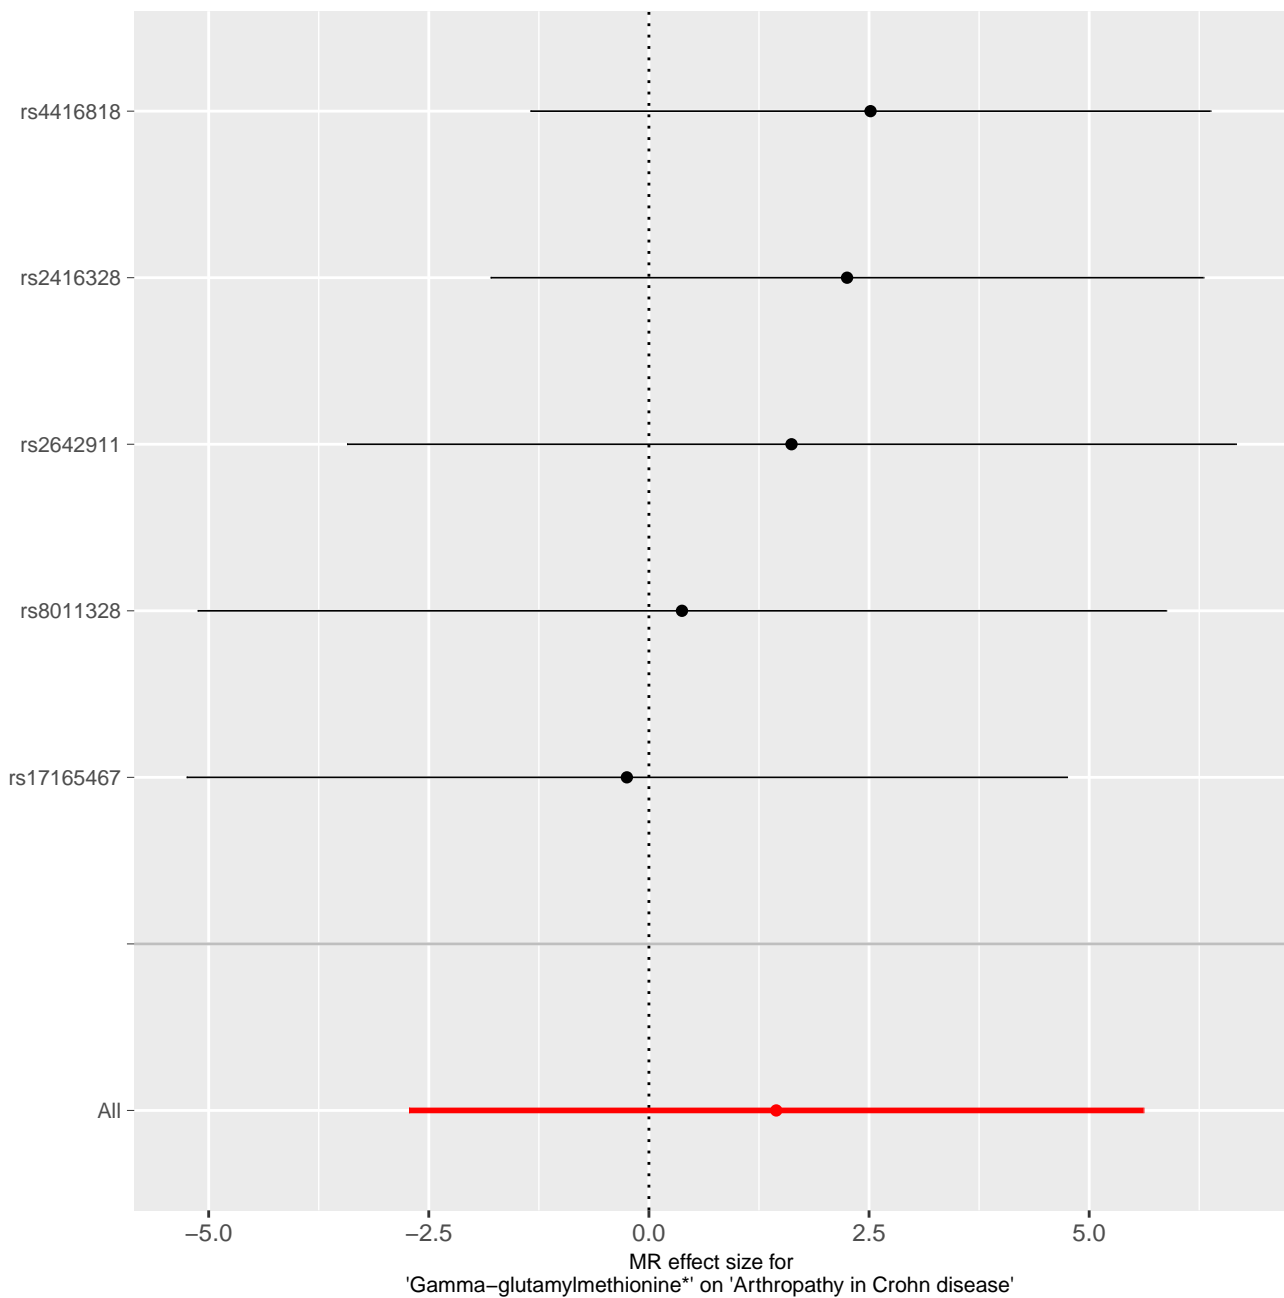



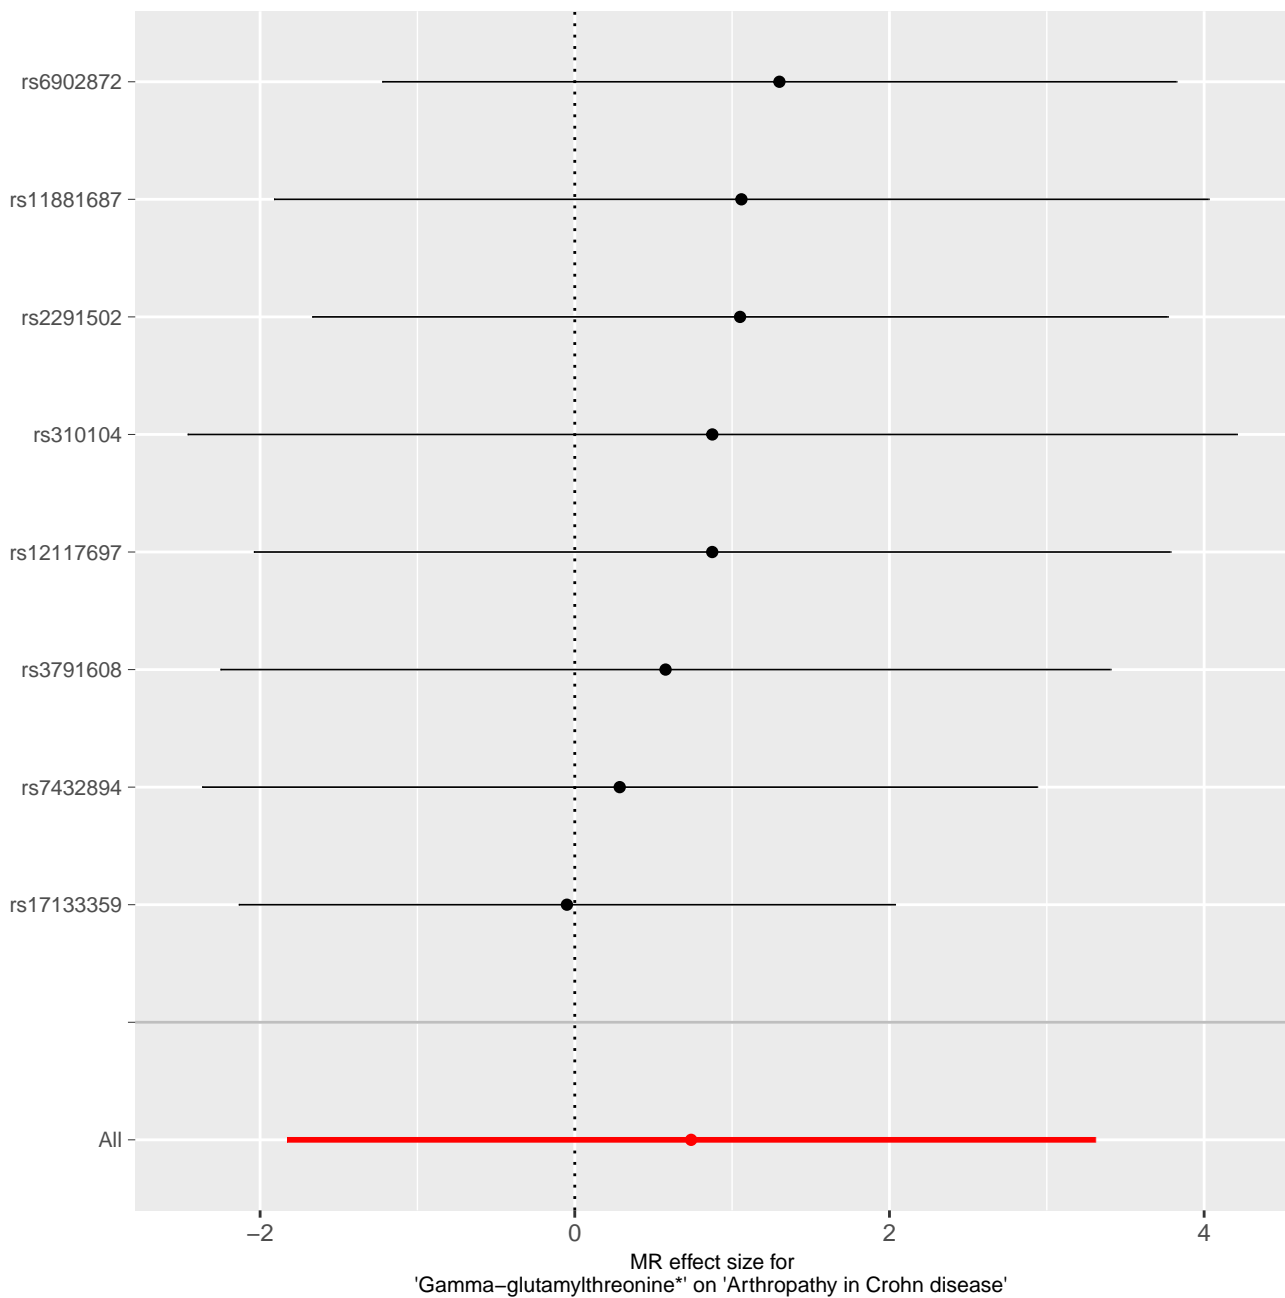

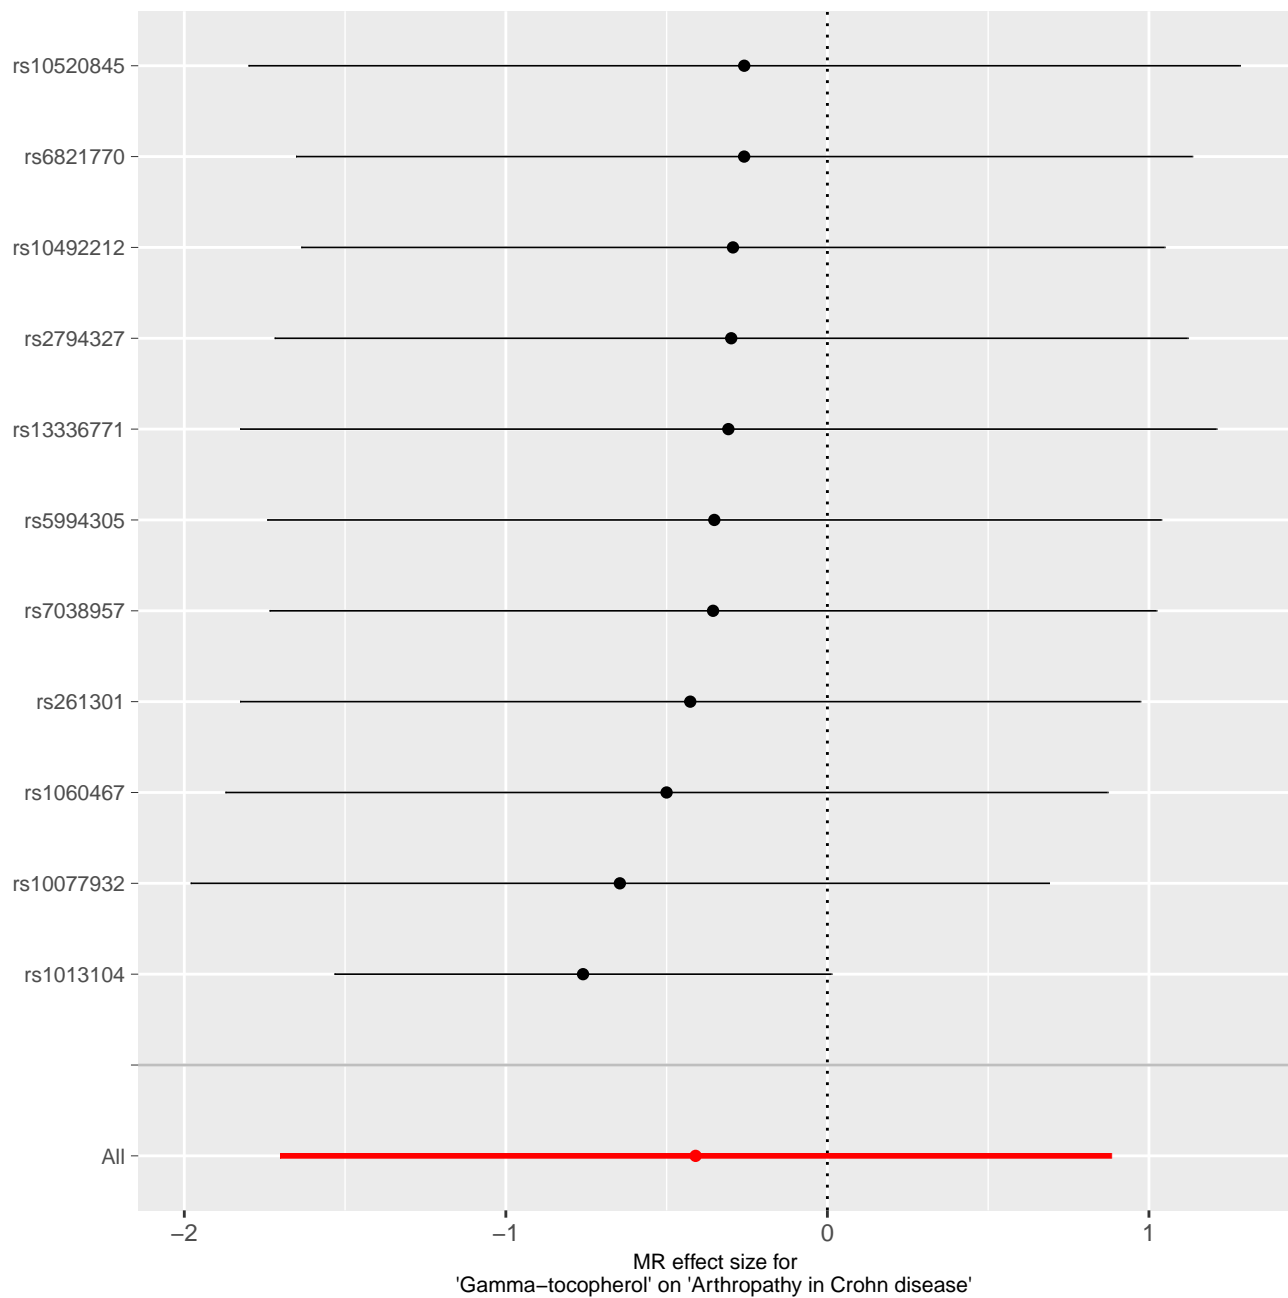

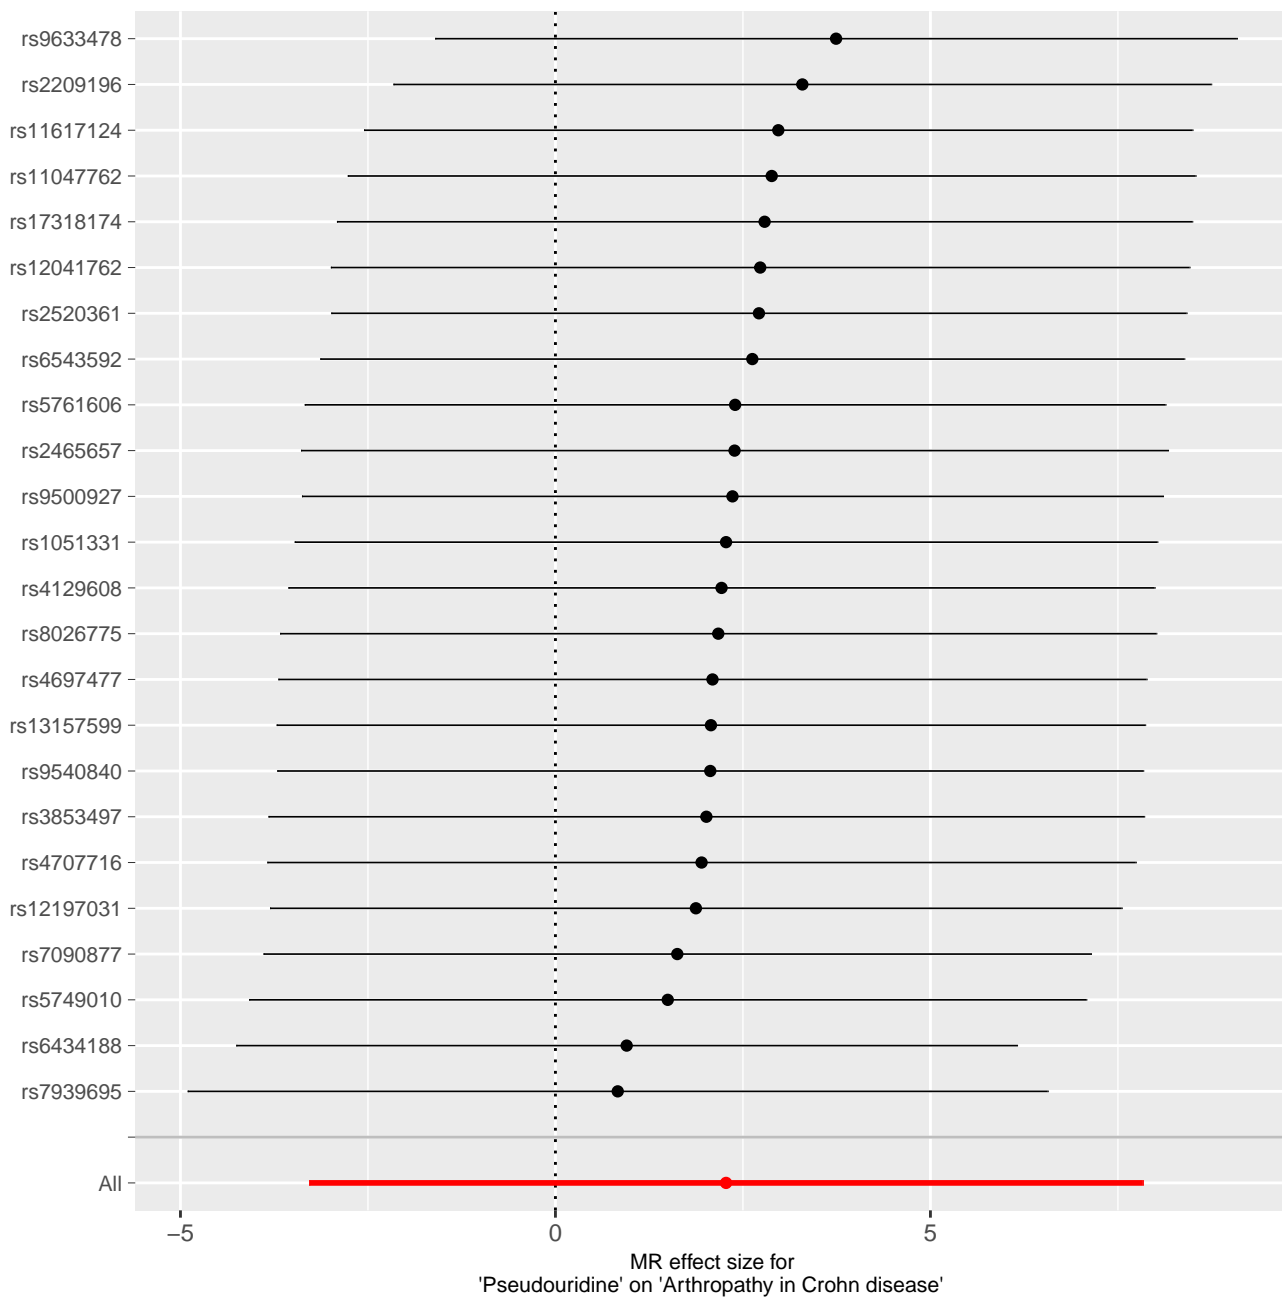

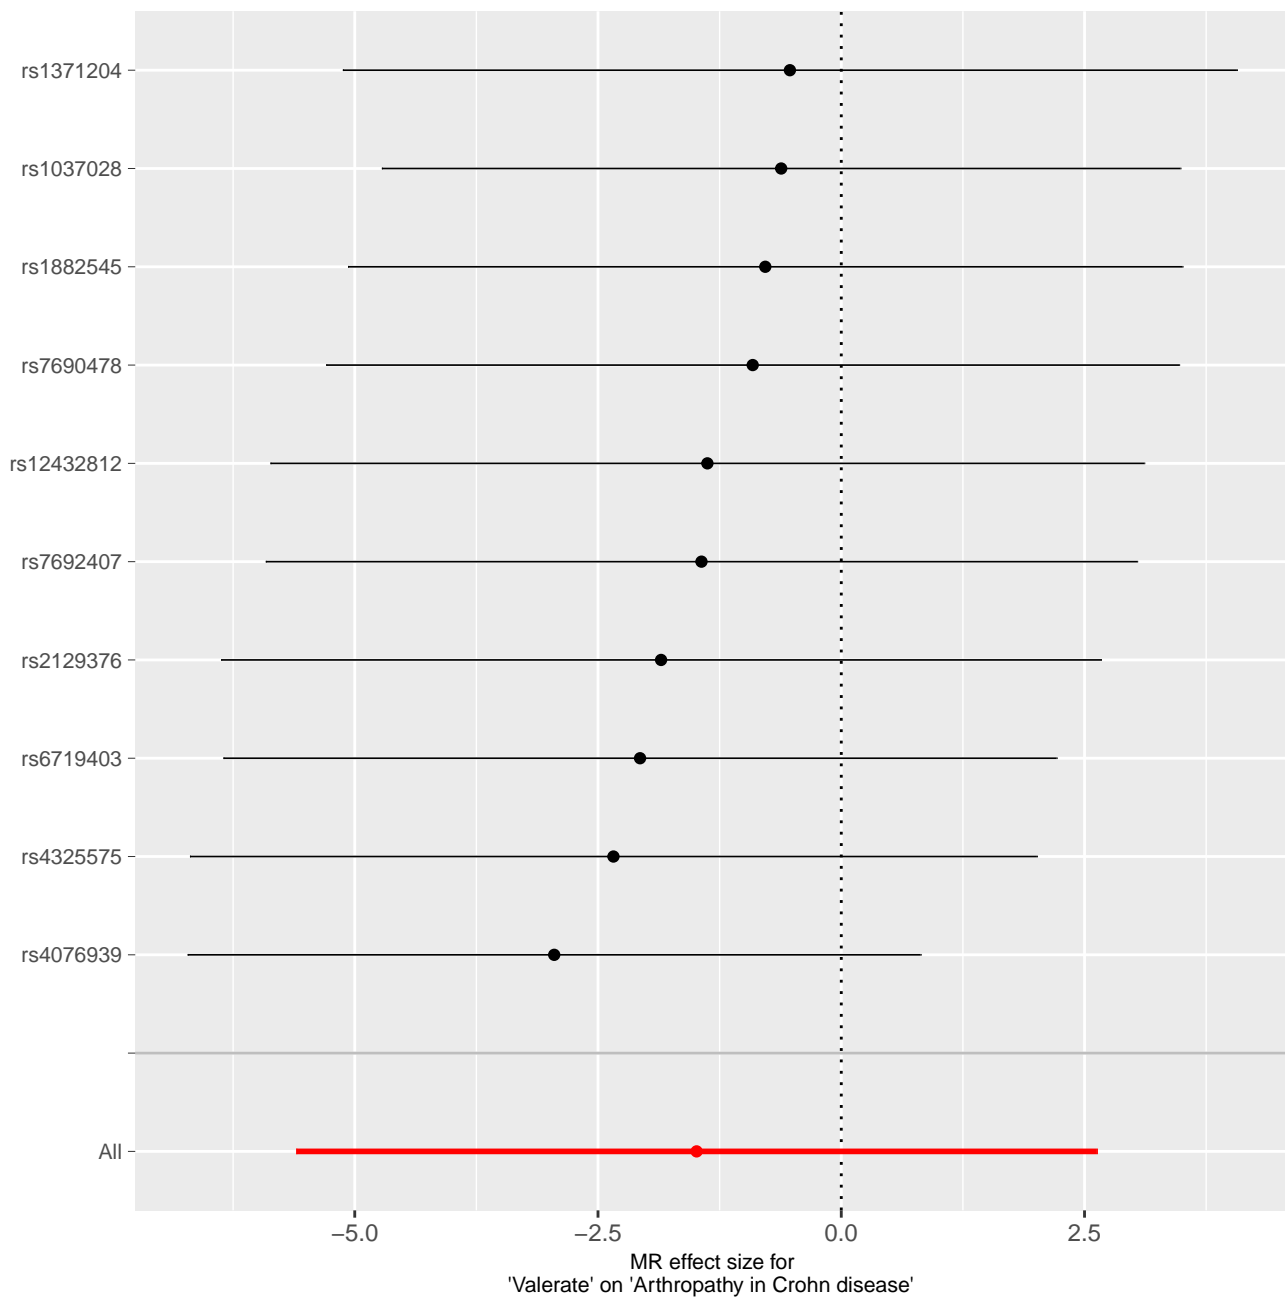

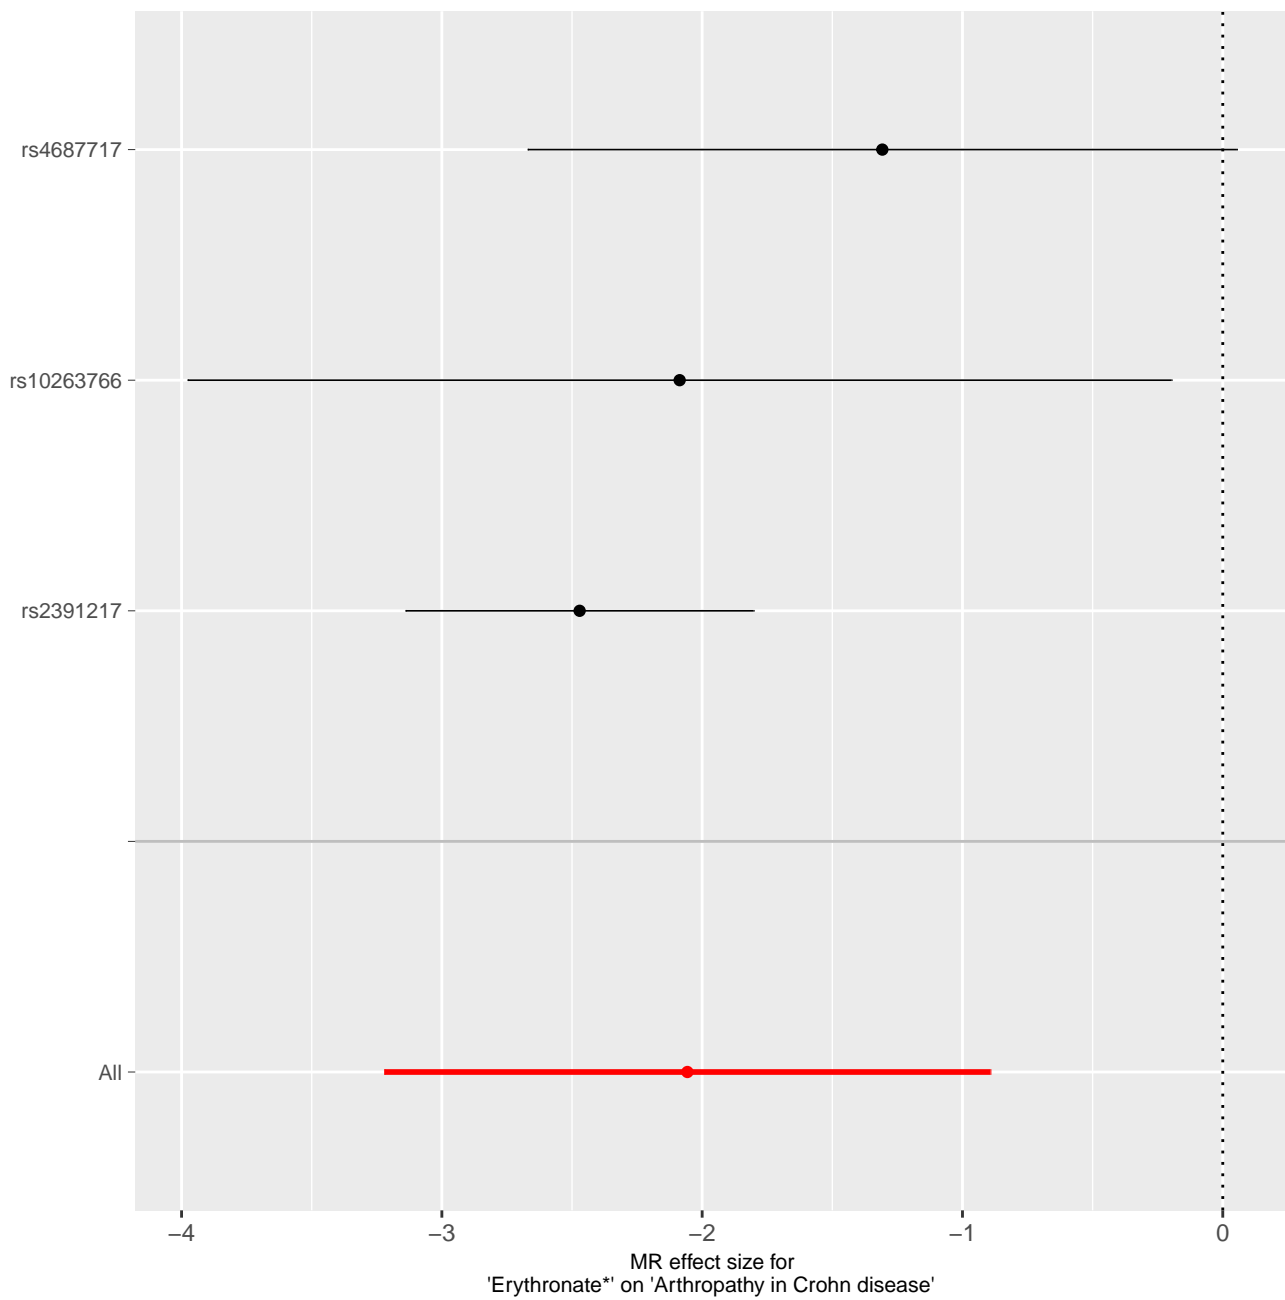

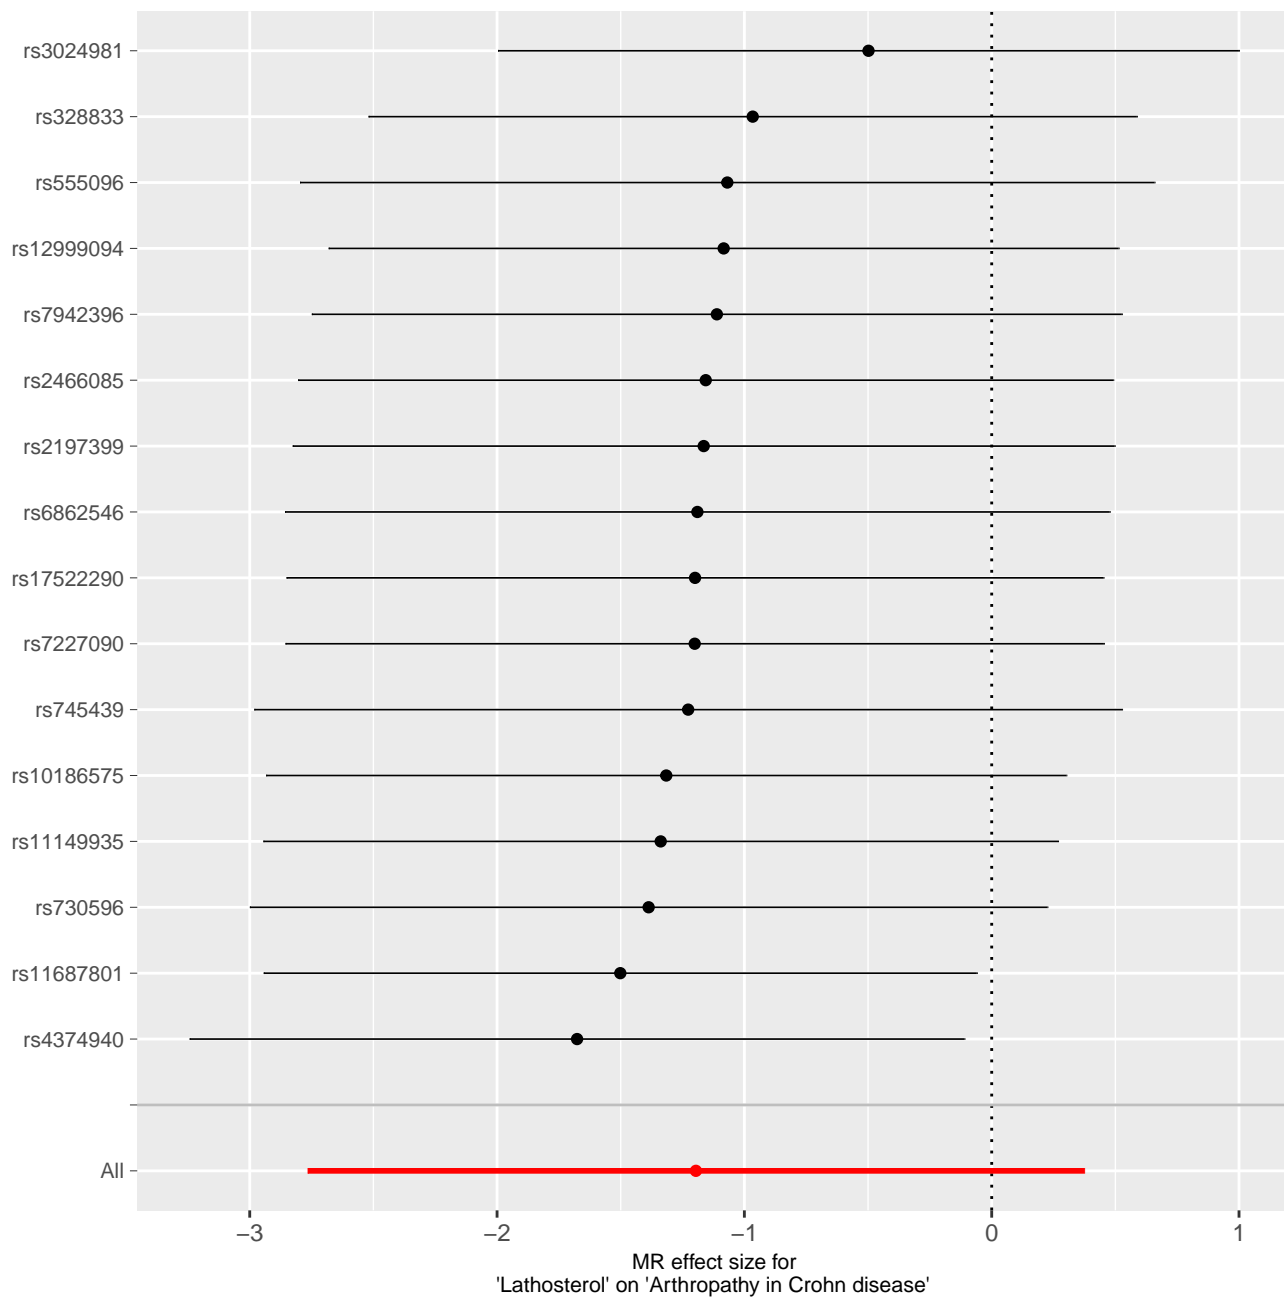

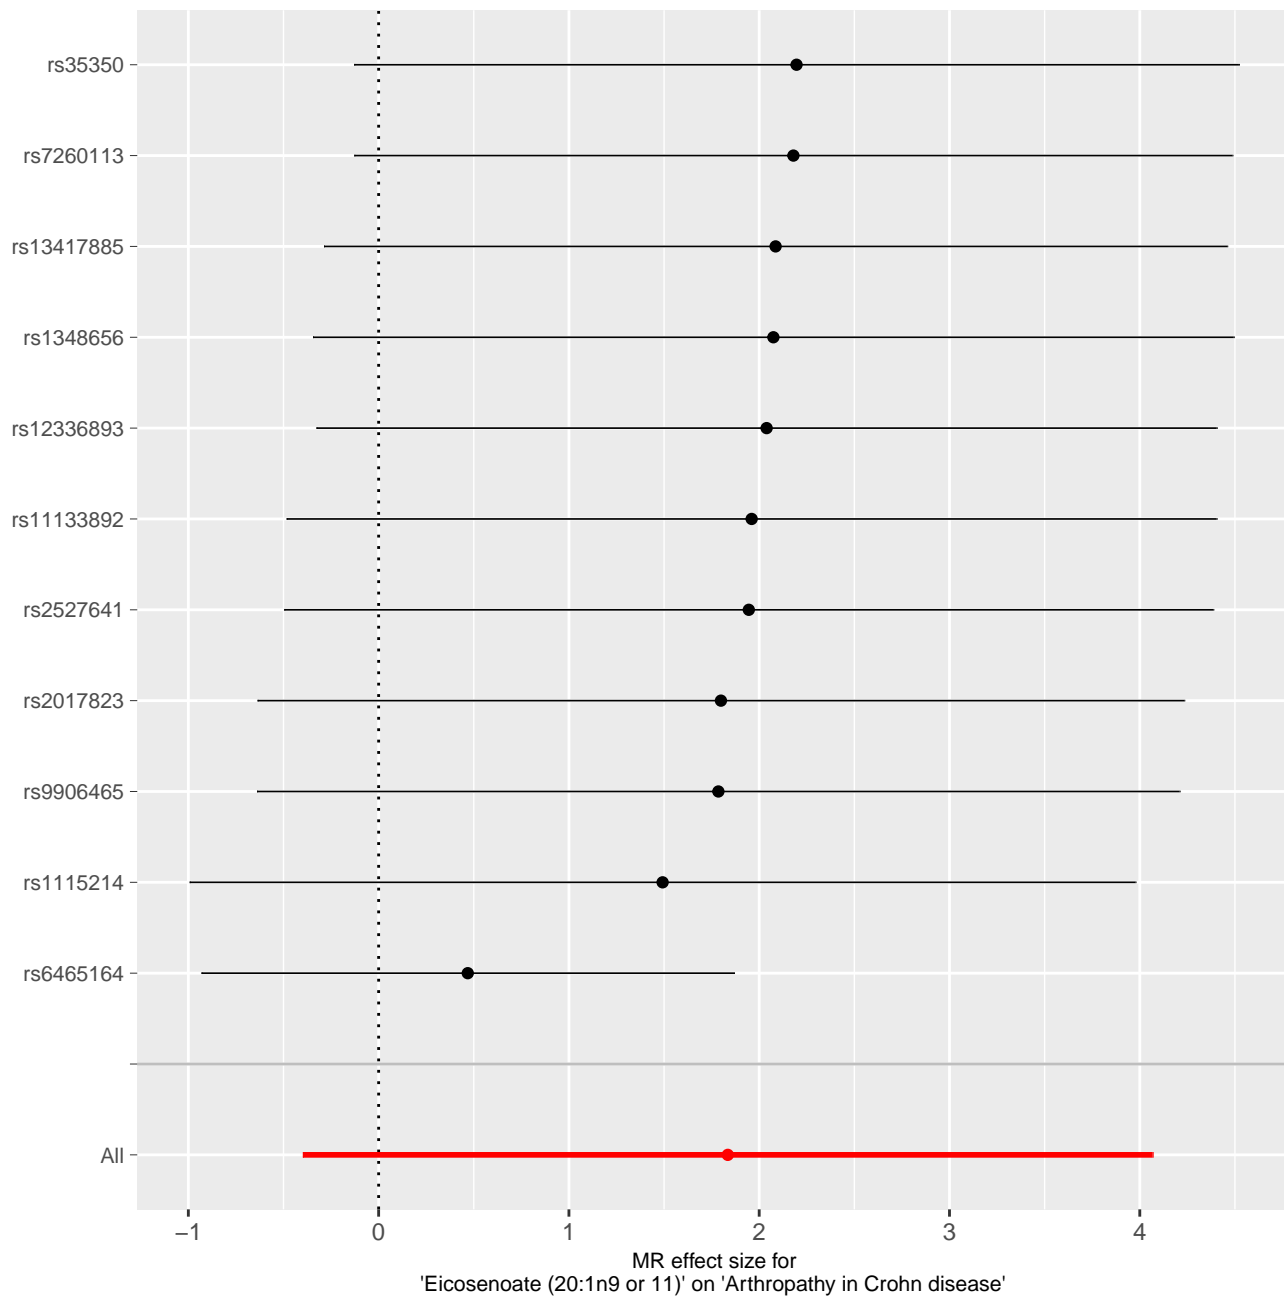

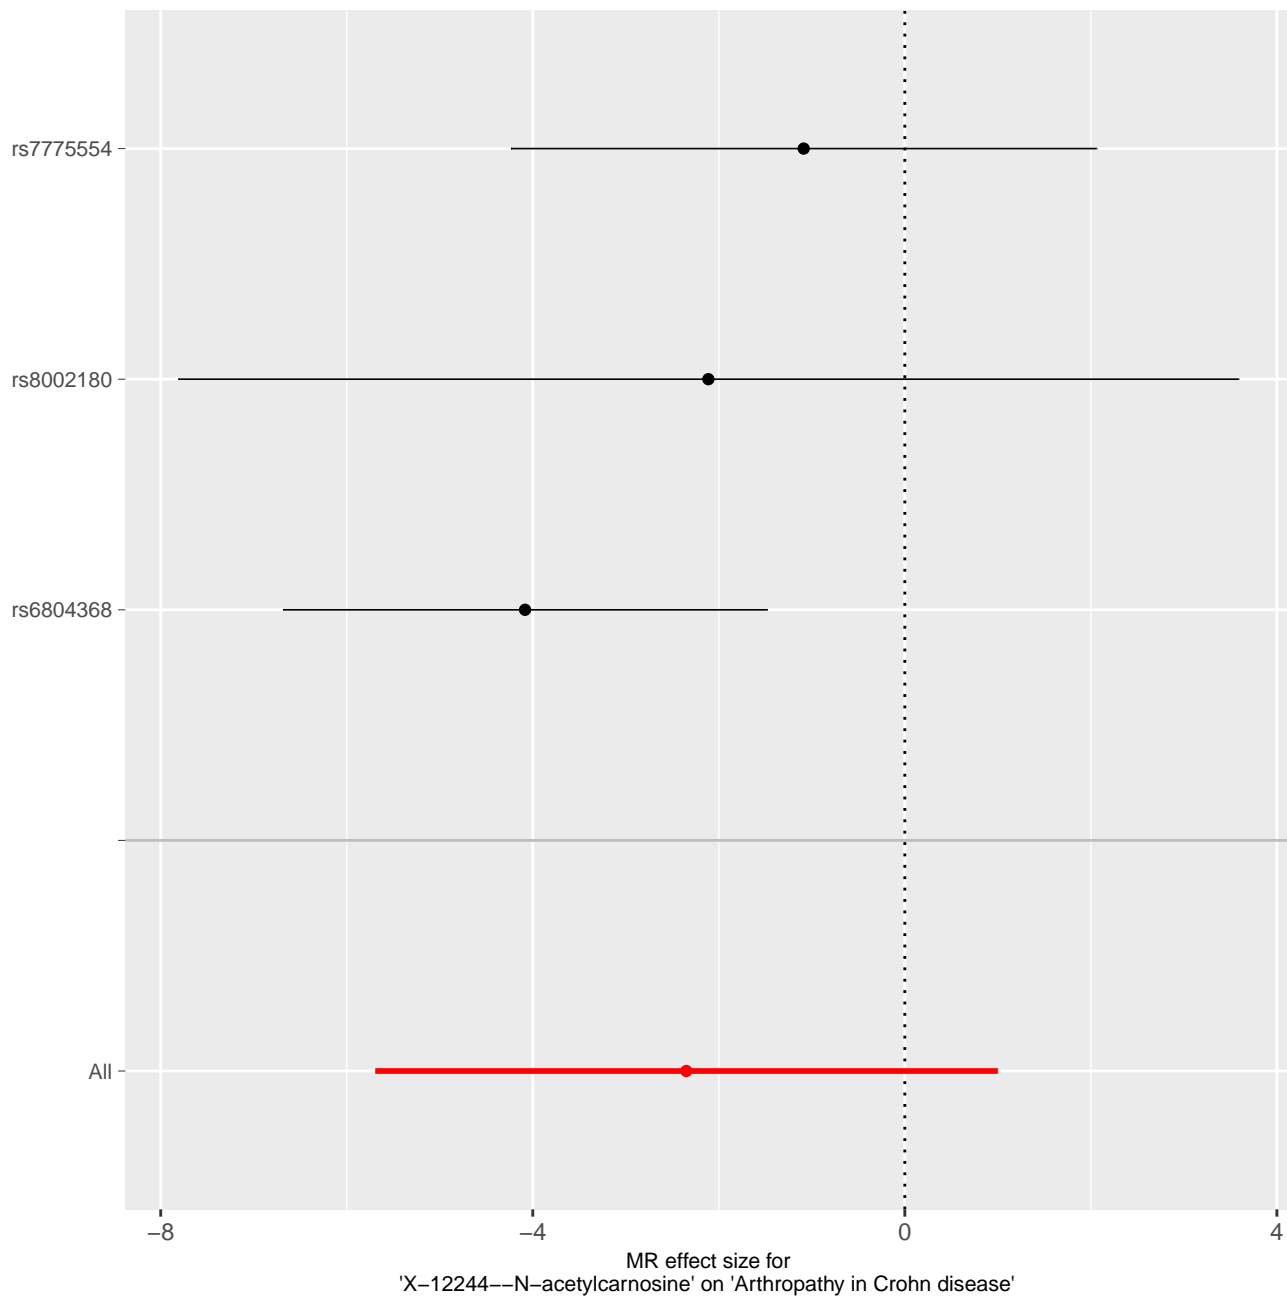



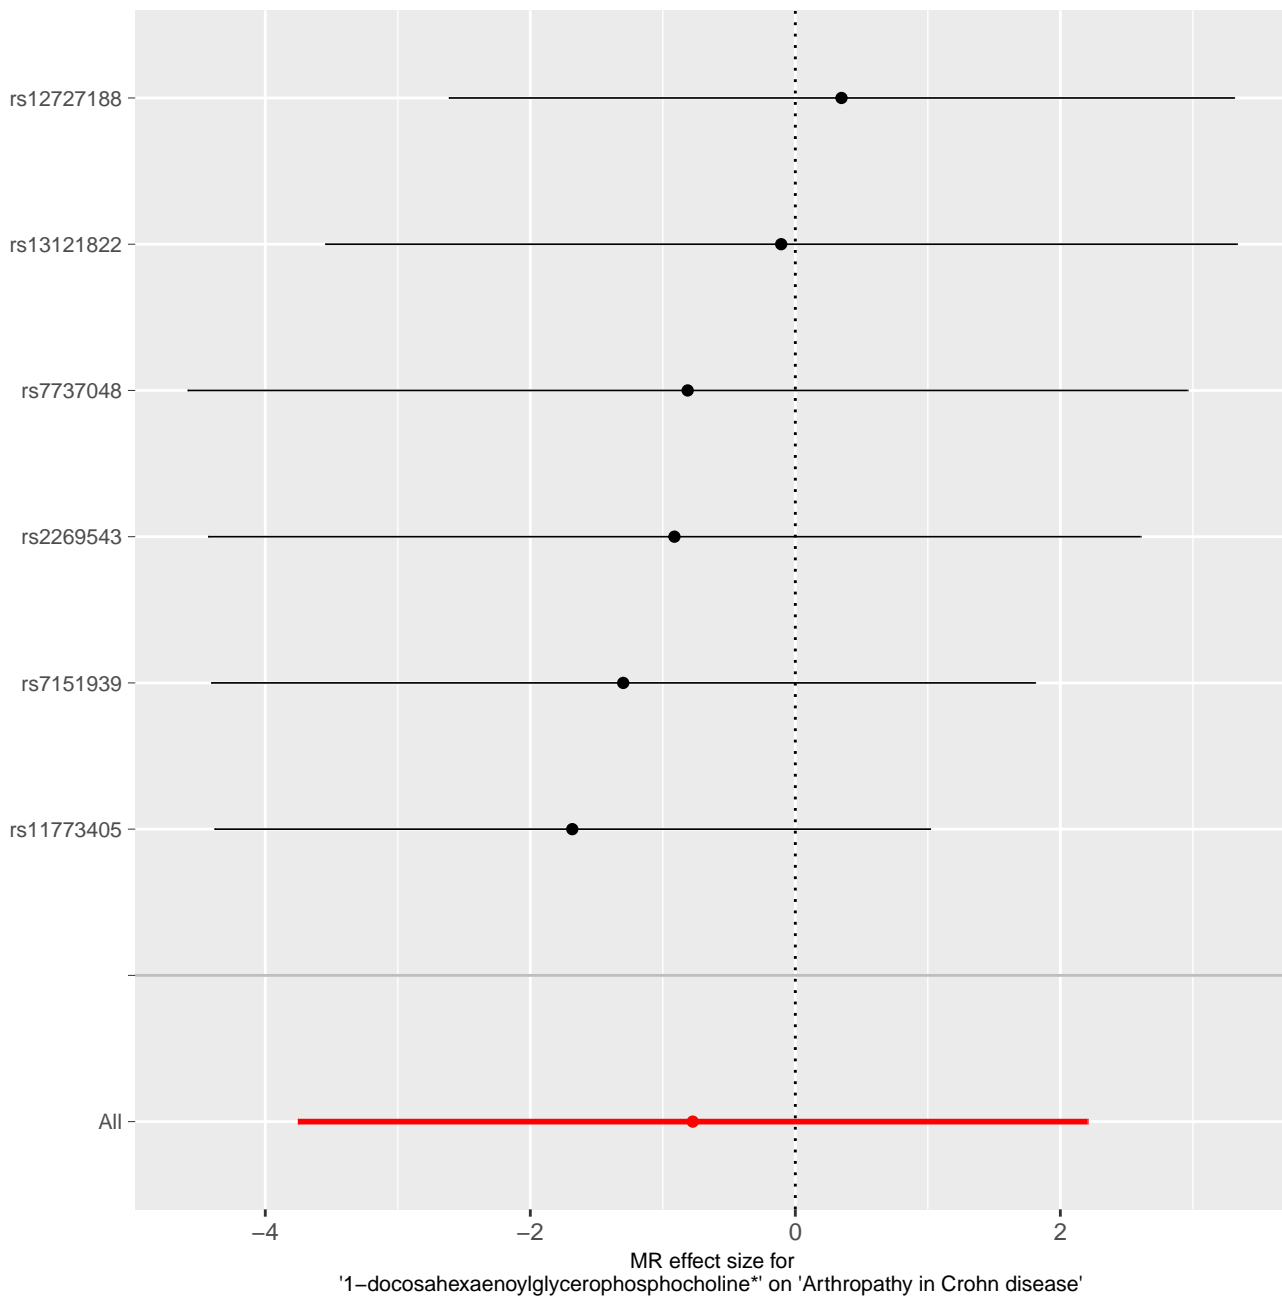

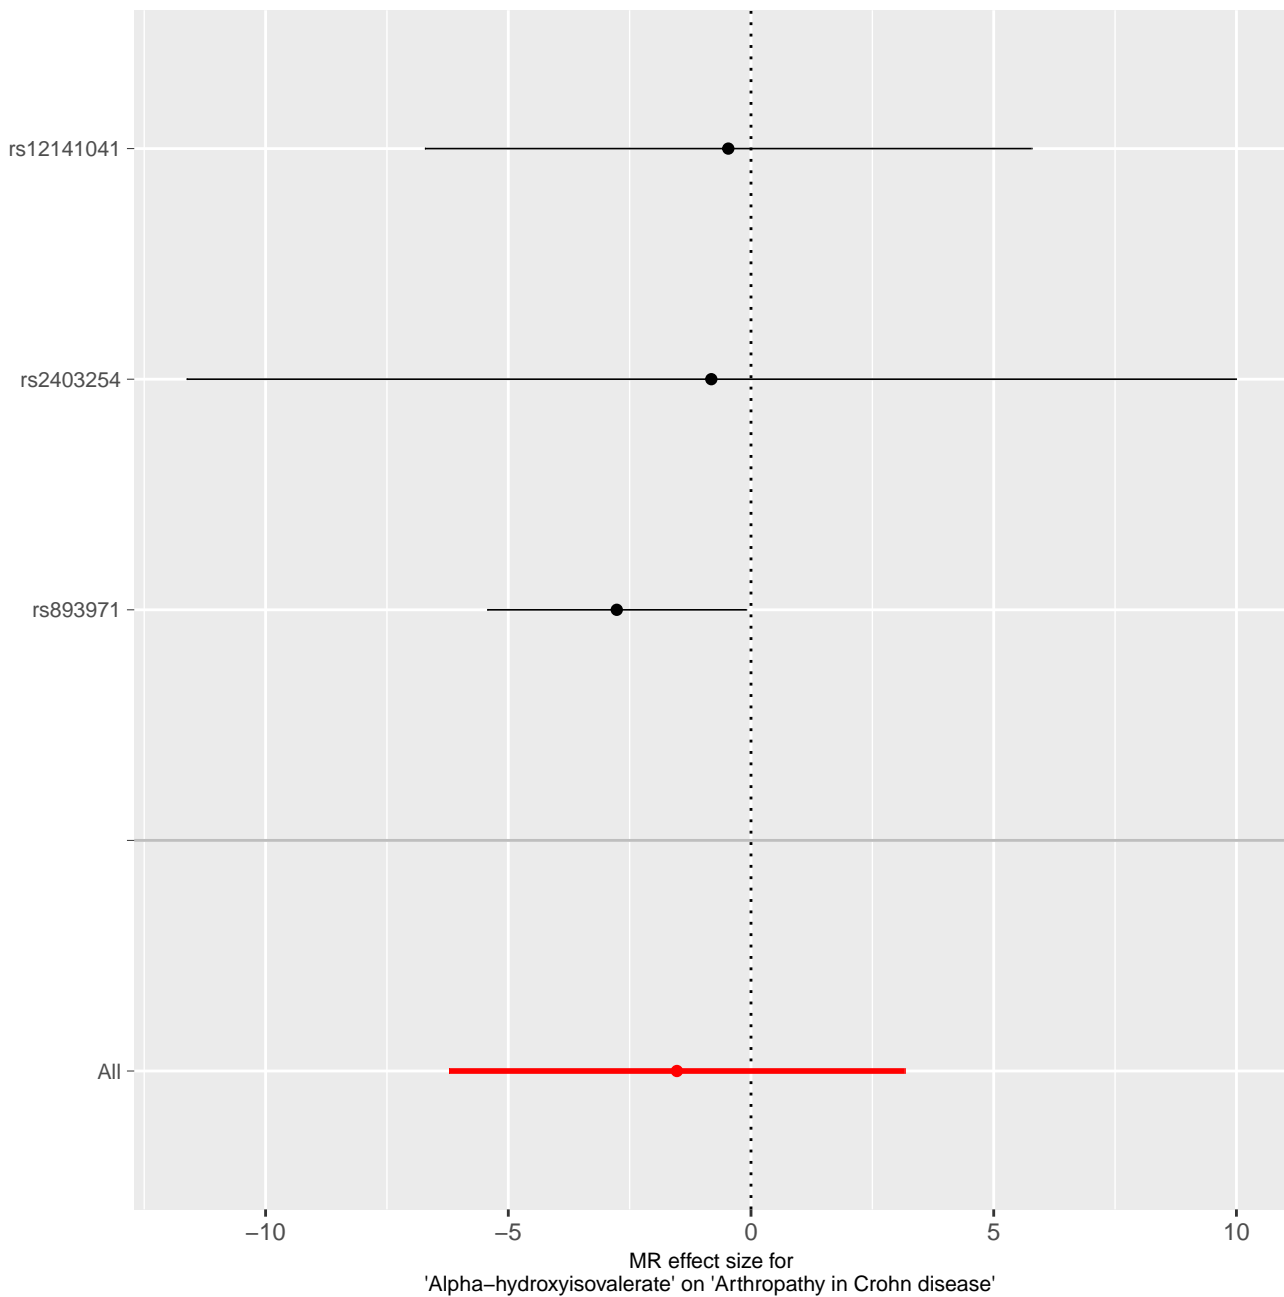

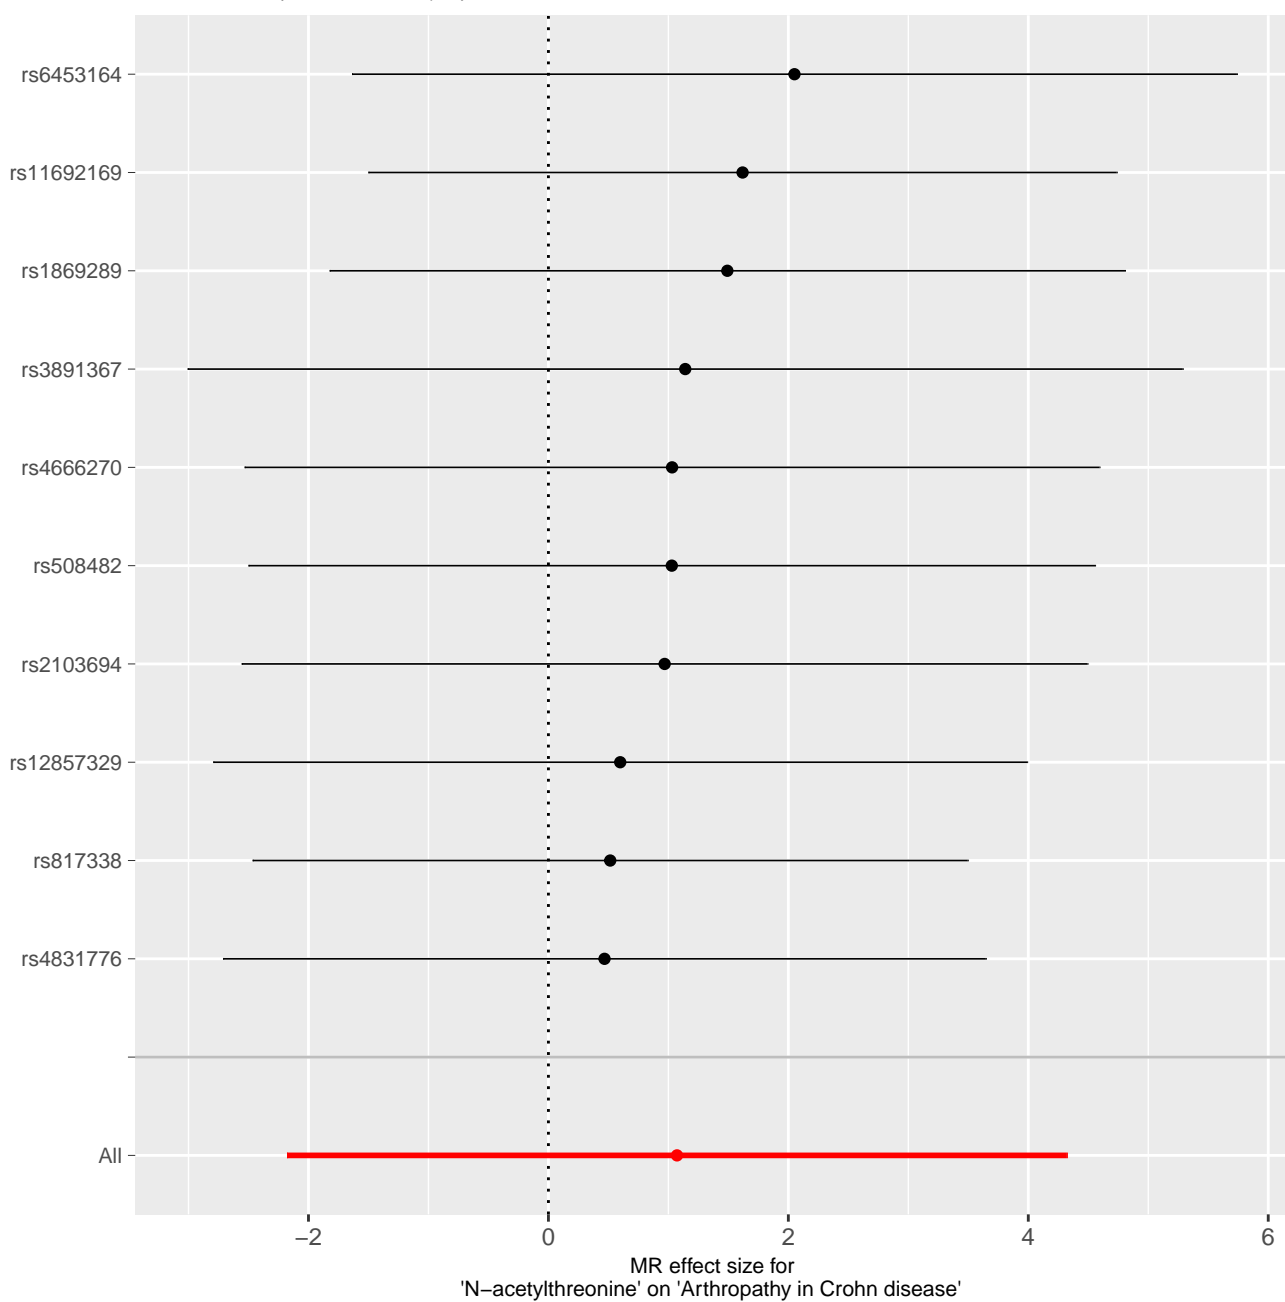

rs2062541

rs7552404

rs8396

All

-4

-2

0

2

MR effect size for

'Decanoylcarnitine' on 'Arthropathy in Crohn disease'

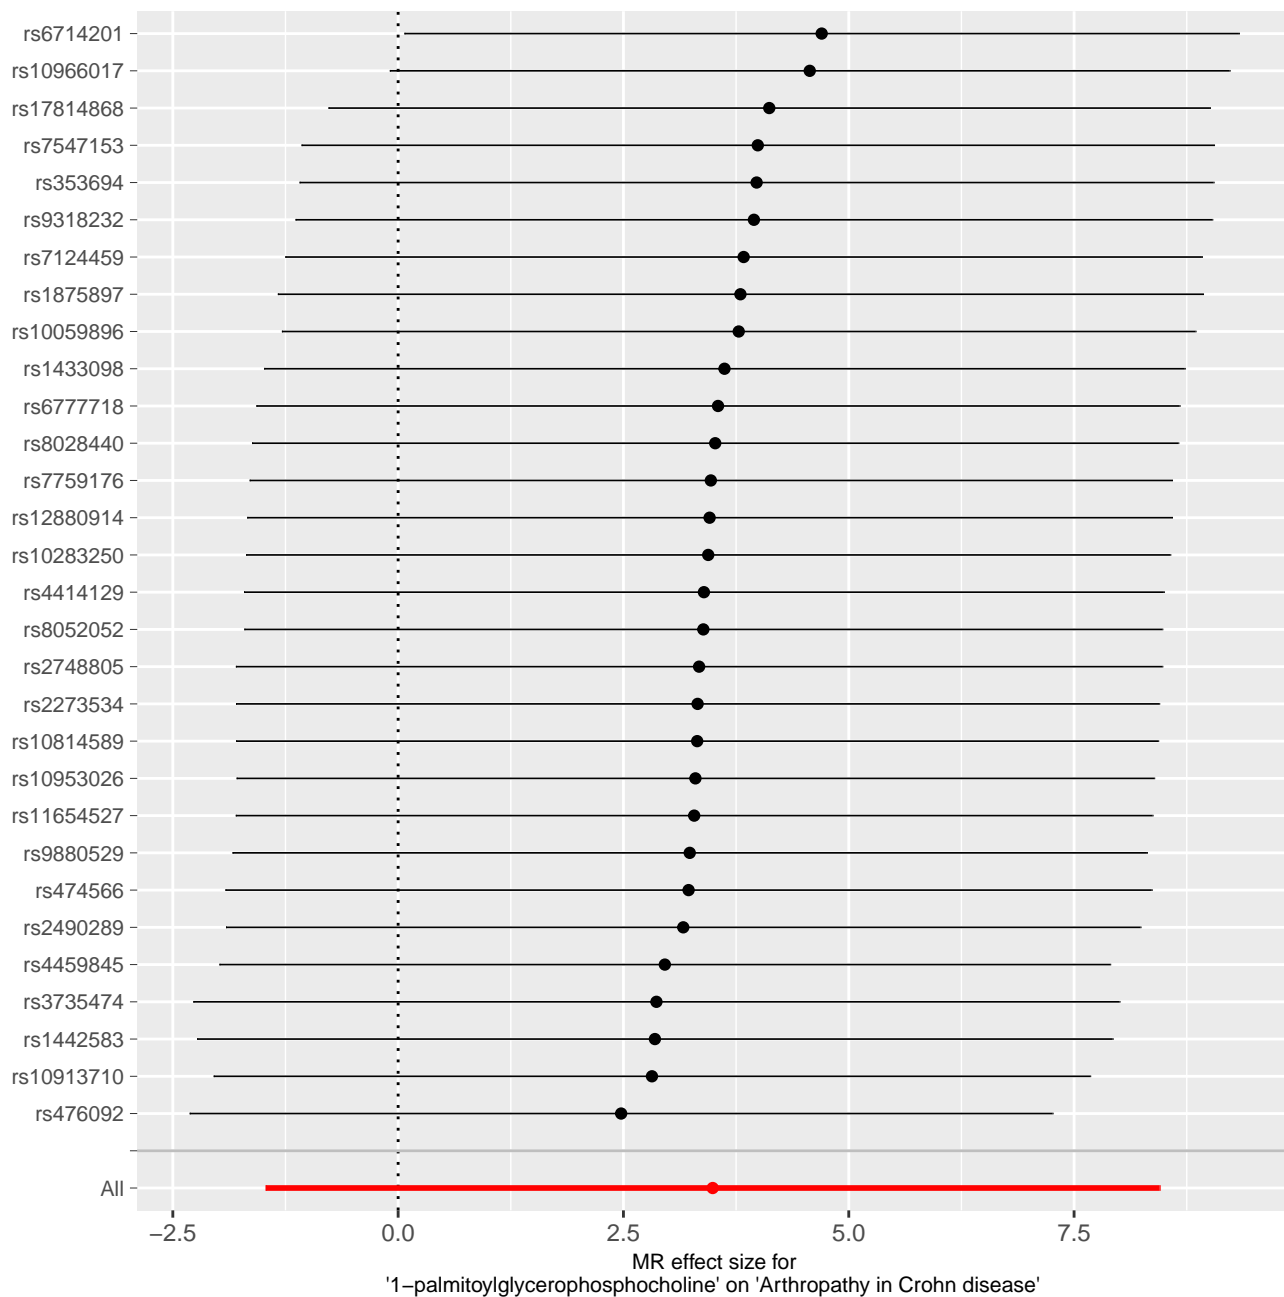

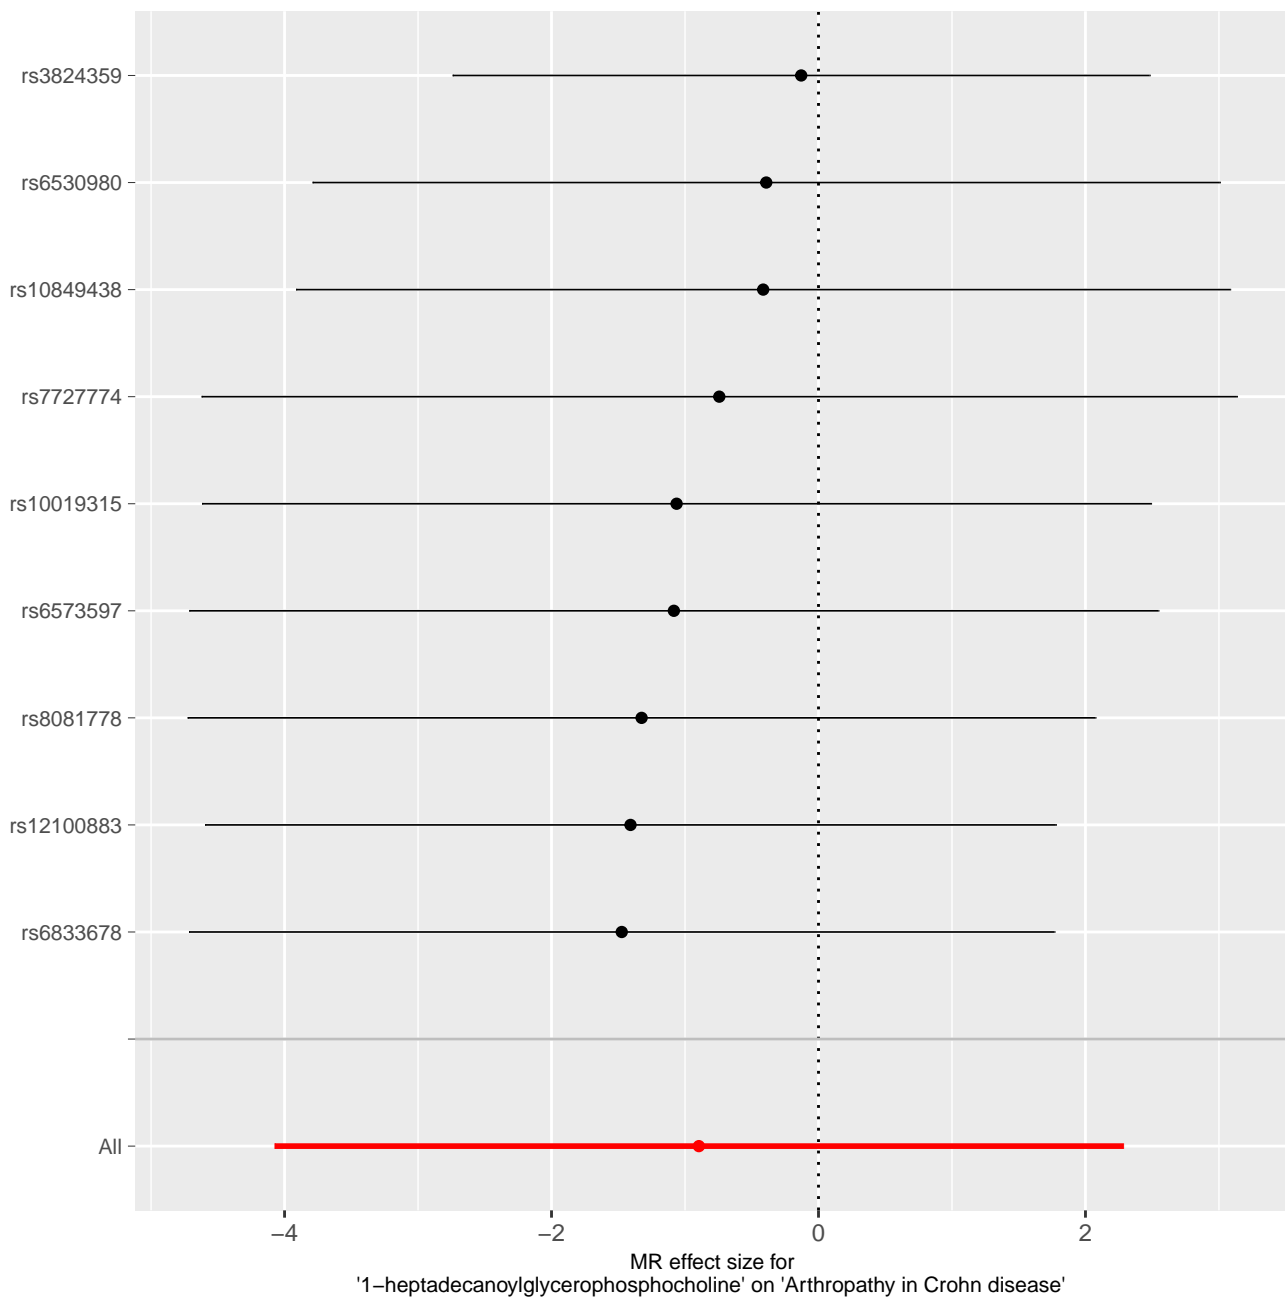

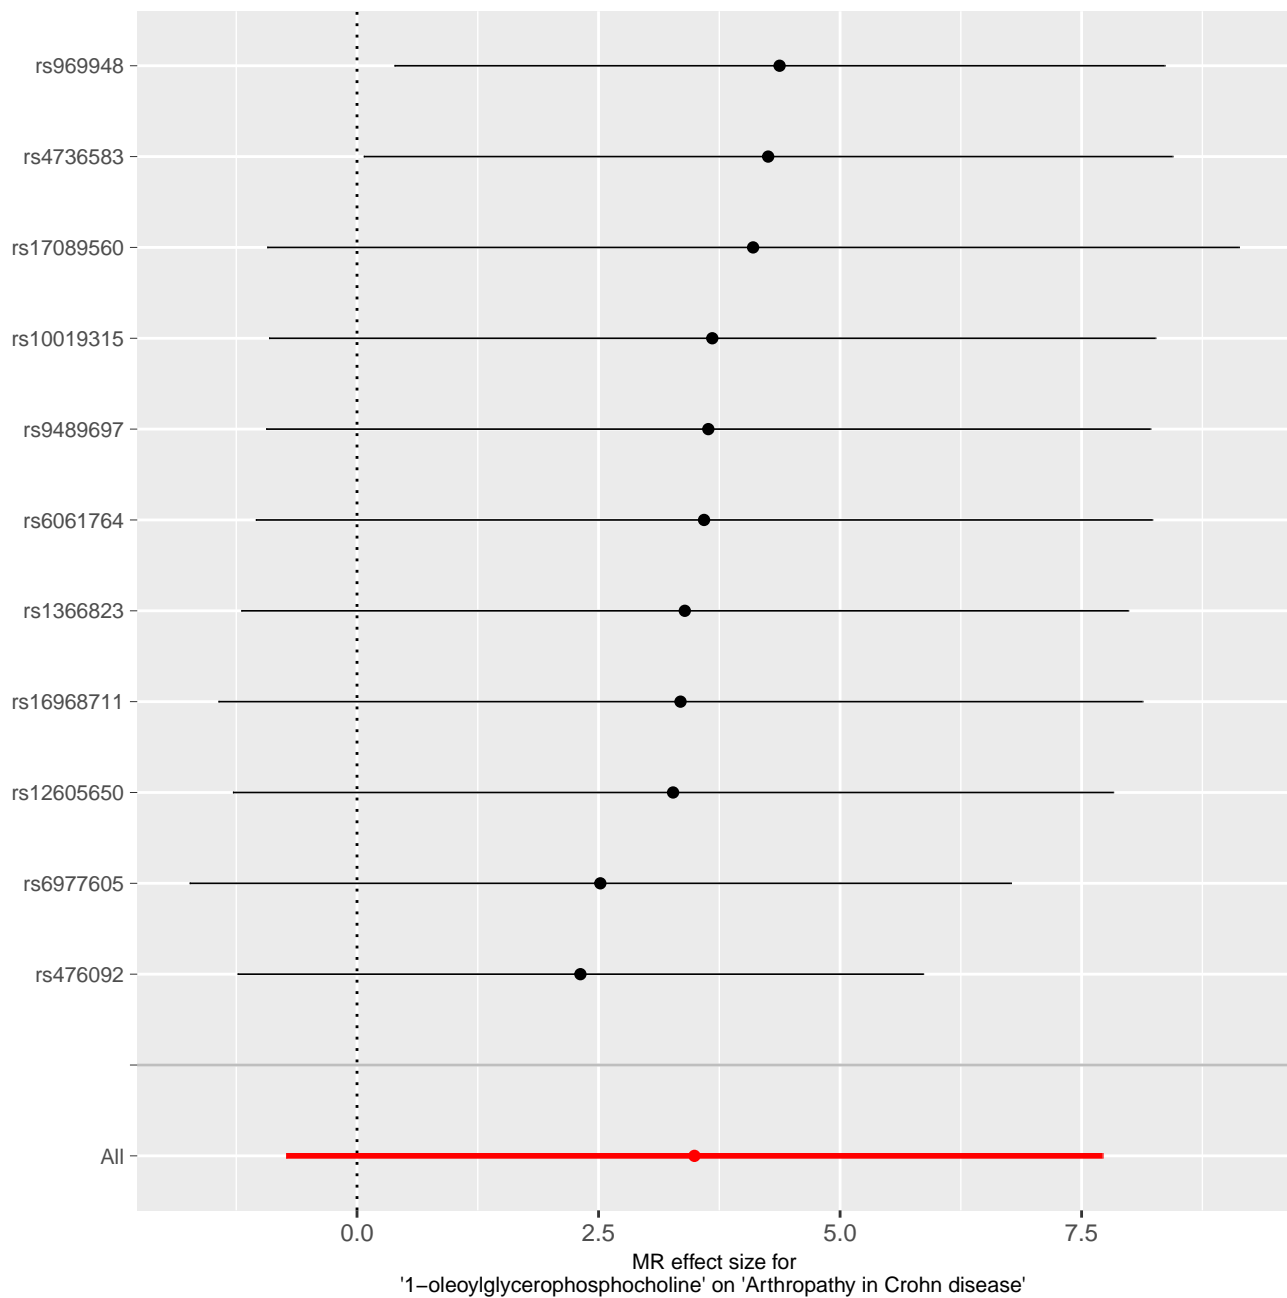

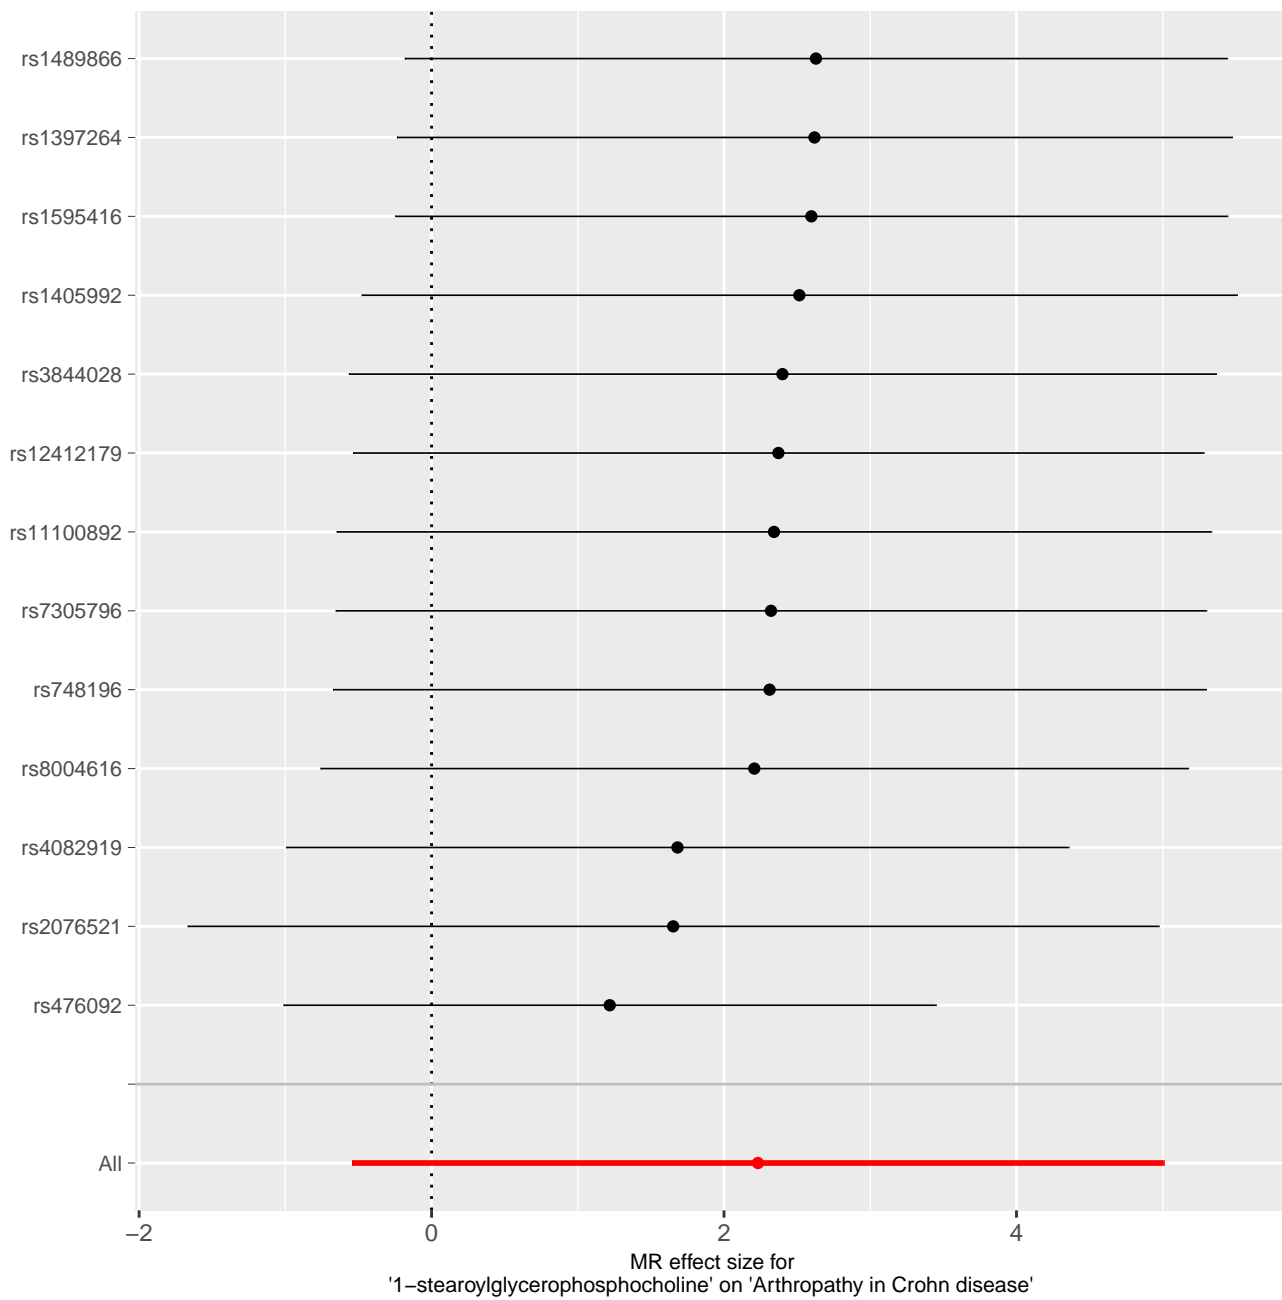



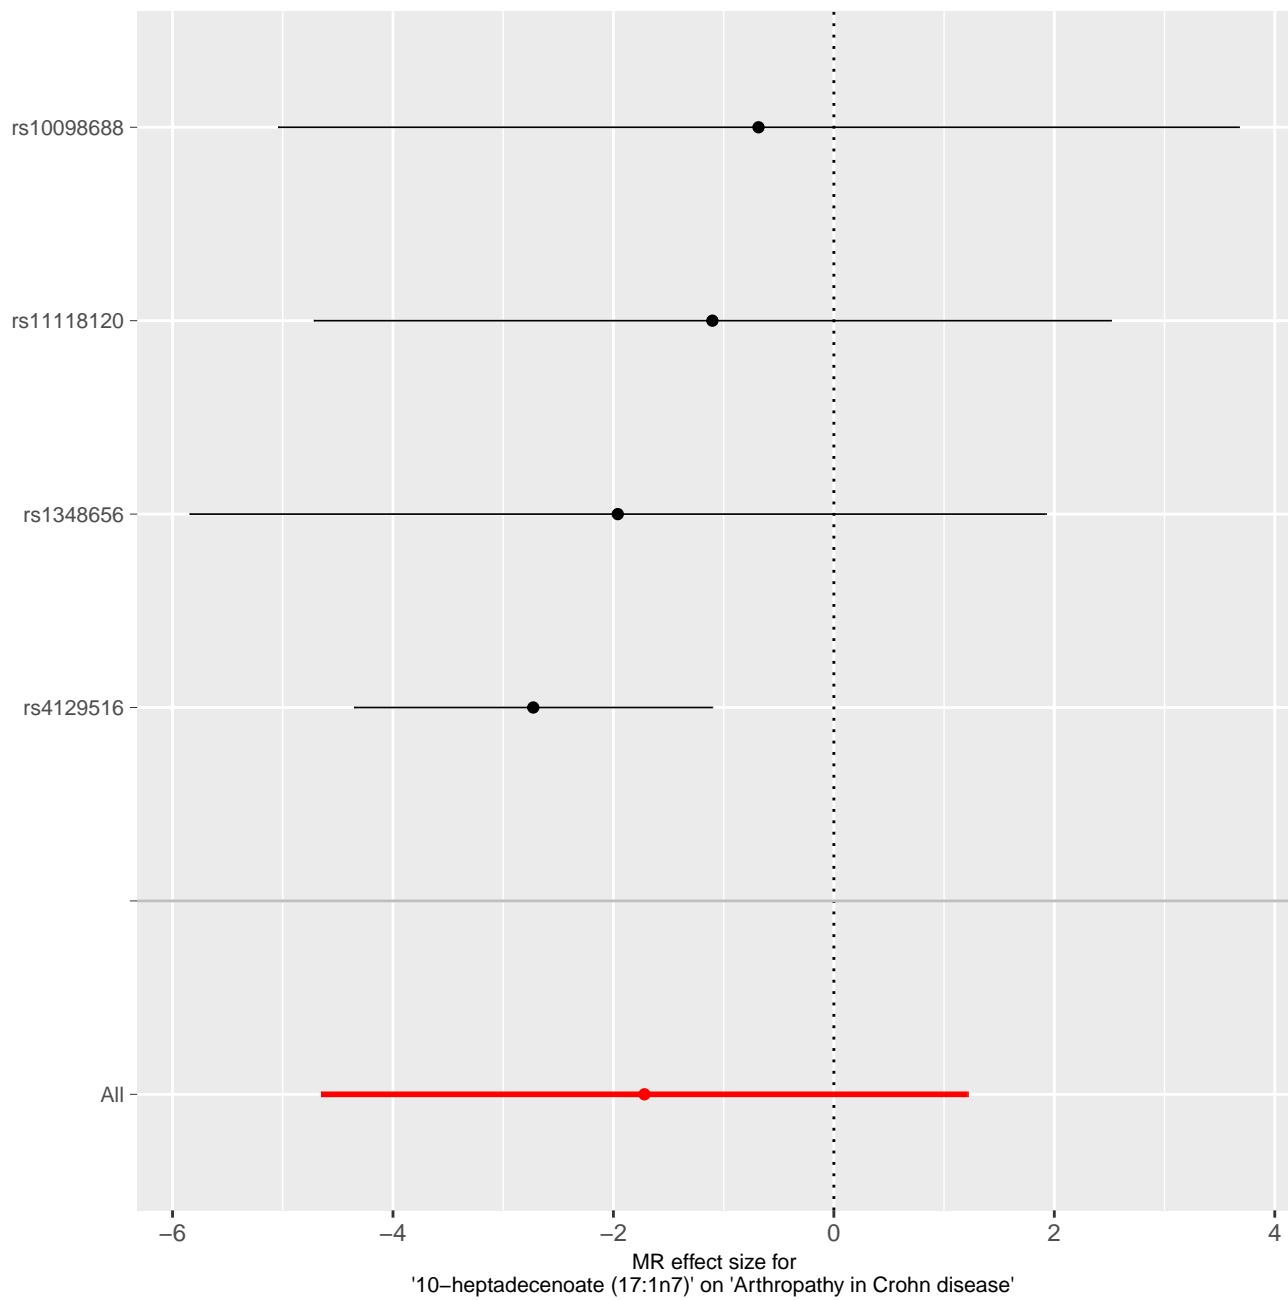

rs1034879

rs1348656

rs2242415

All

-12

-8

-4

0

MR effect size for  
'Linolenate [alpha or gamma; (18:3n3 or 6)]' on 'Arthropathy in Crohn disease'

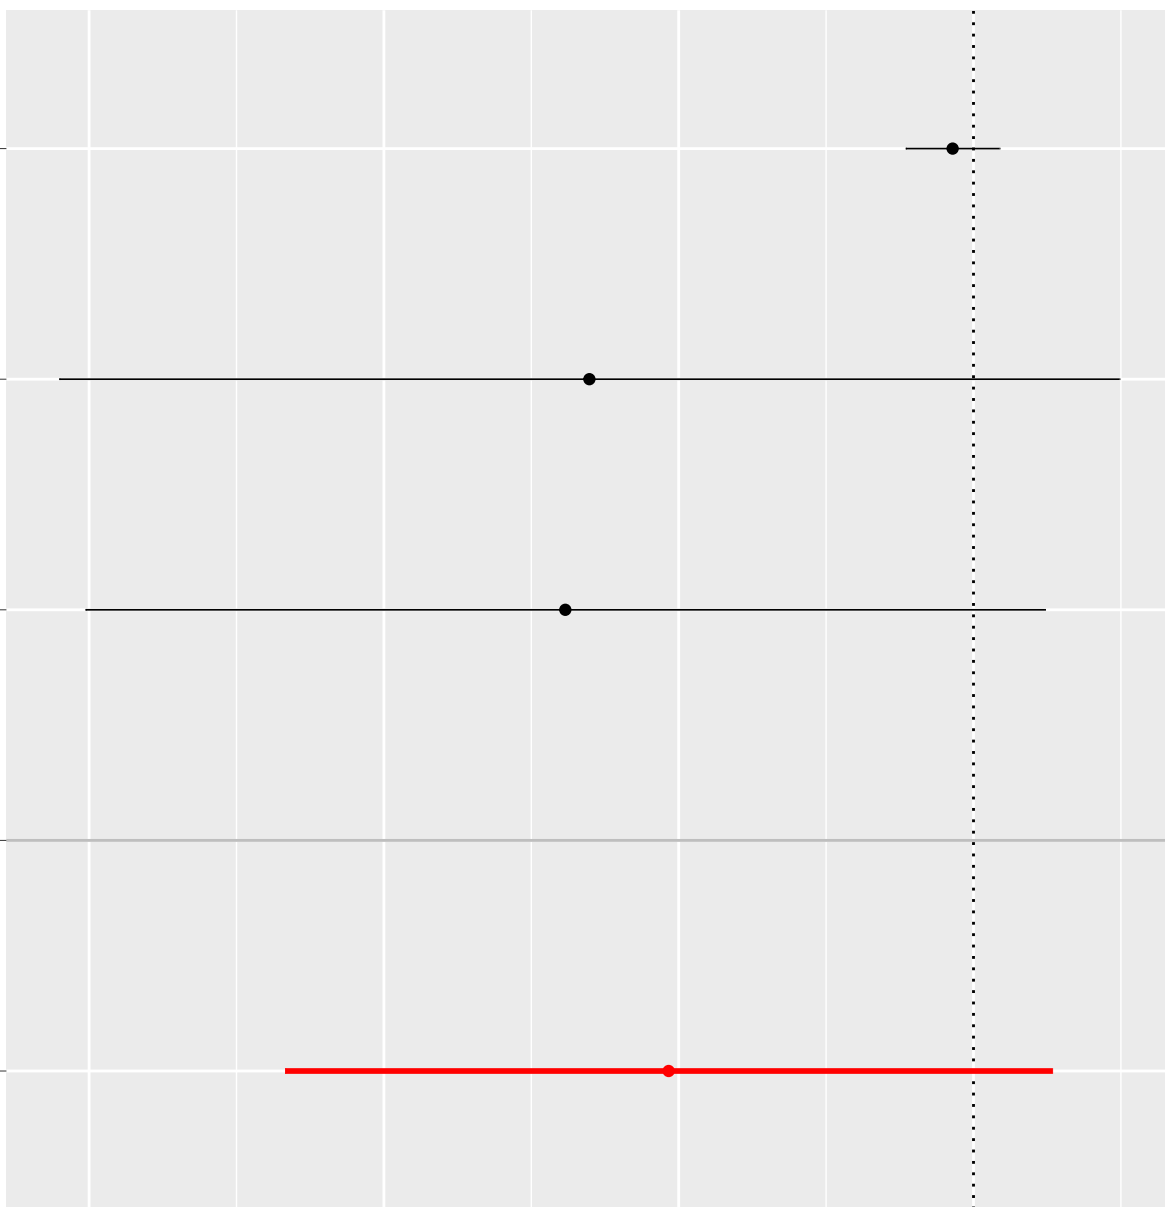

rs1165209

rs13538

rs1466245

All

-1

0

1

2

MR effect size for

'X-12510--2-aminooctanoic acid' on 'Arthropathy in Crohn disease'

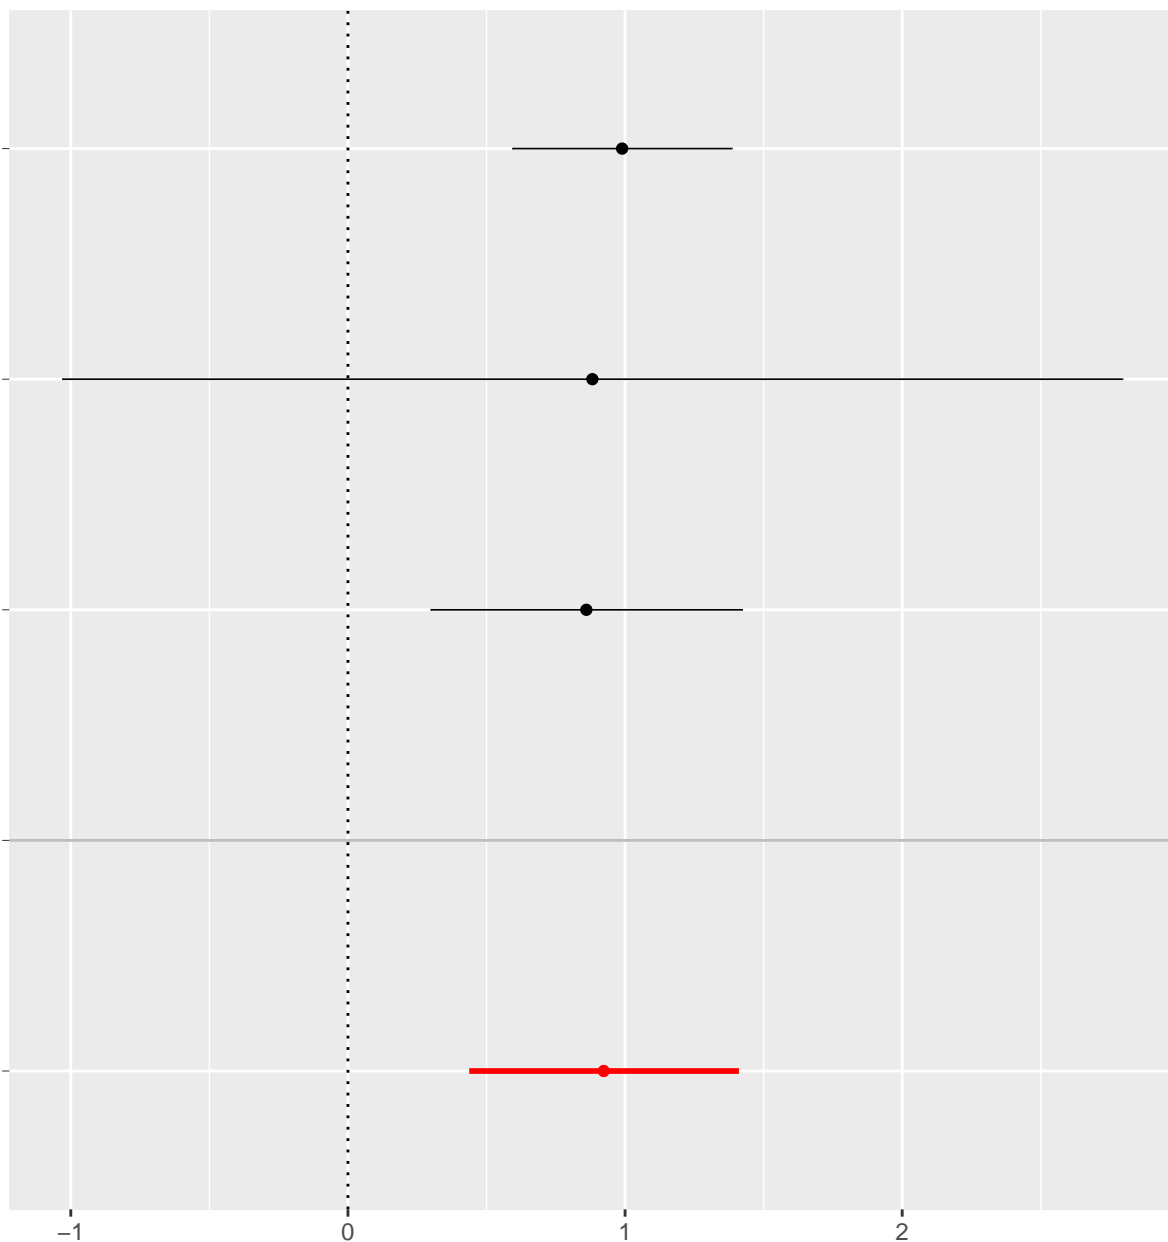

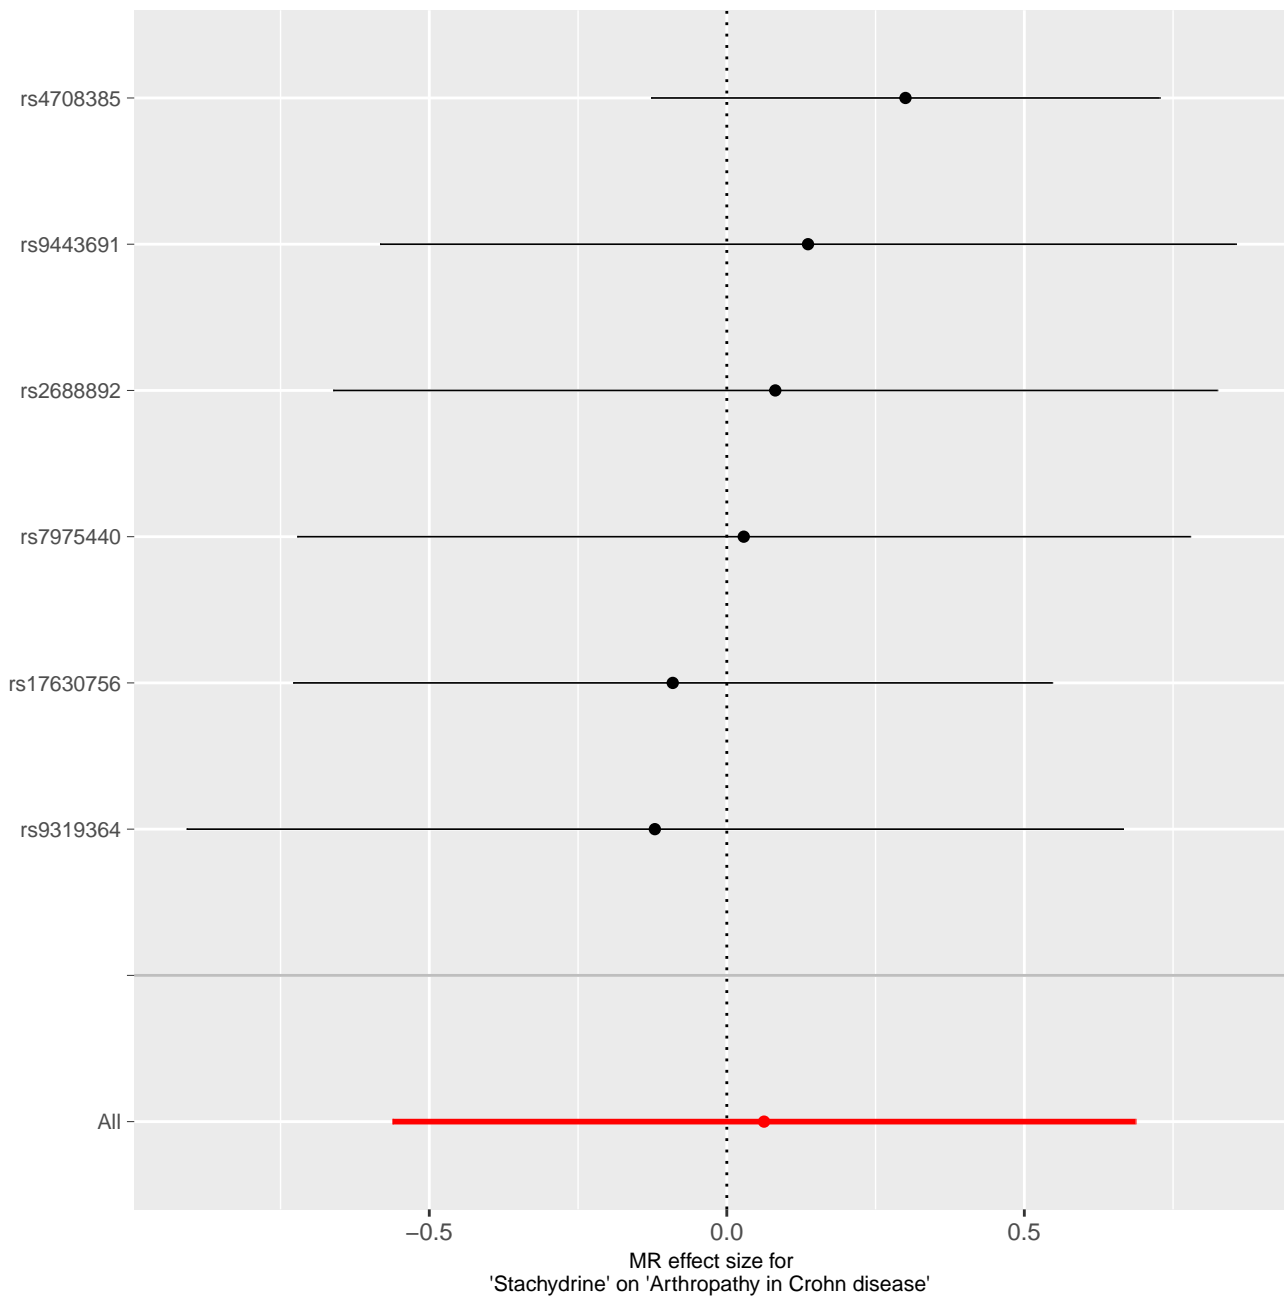

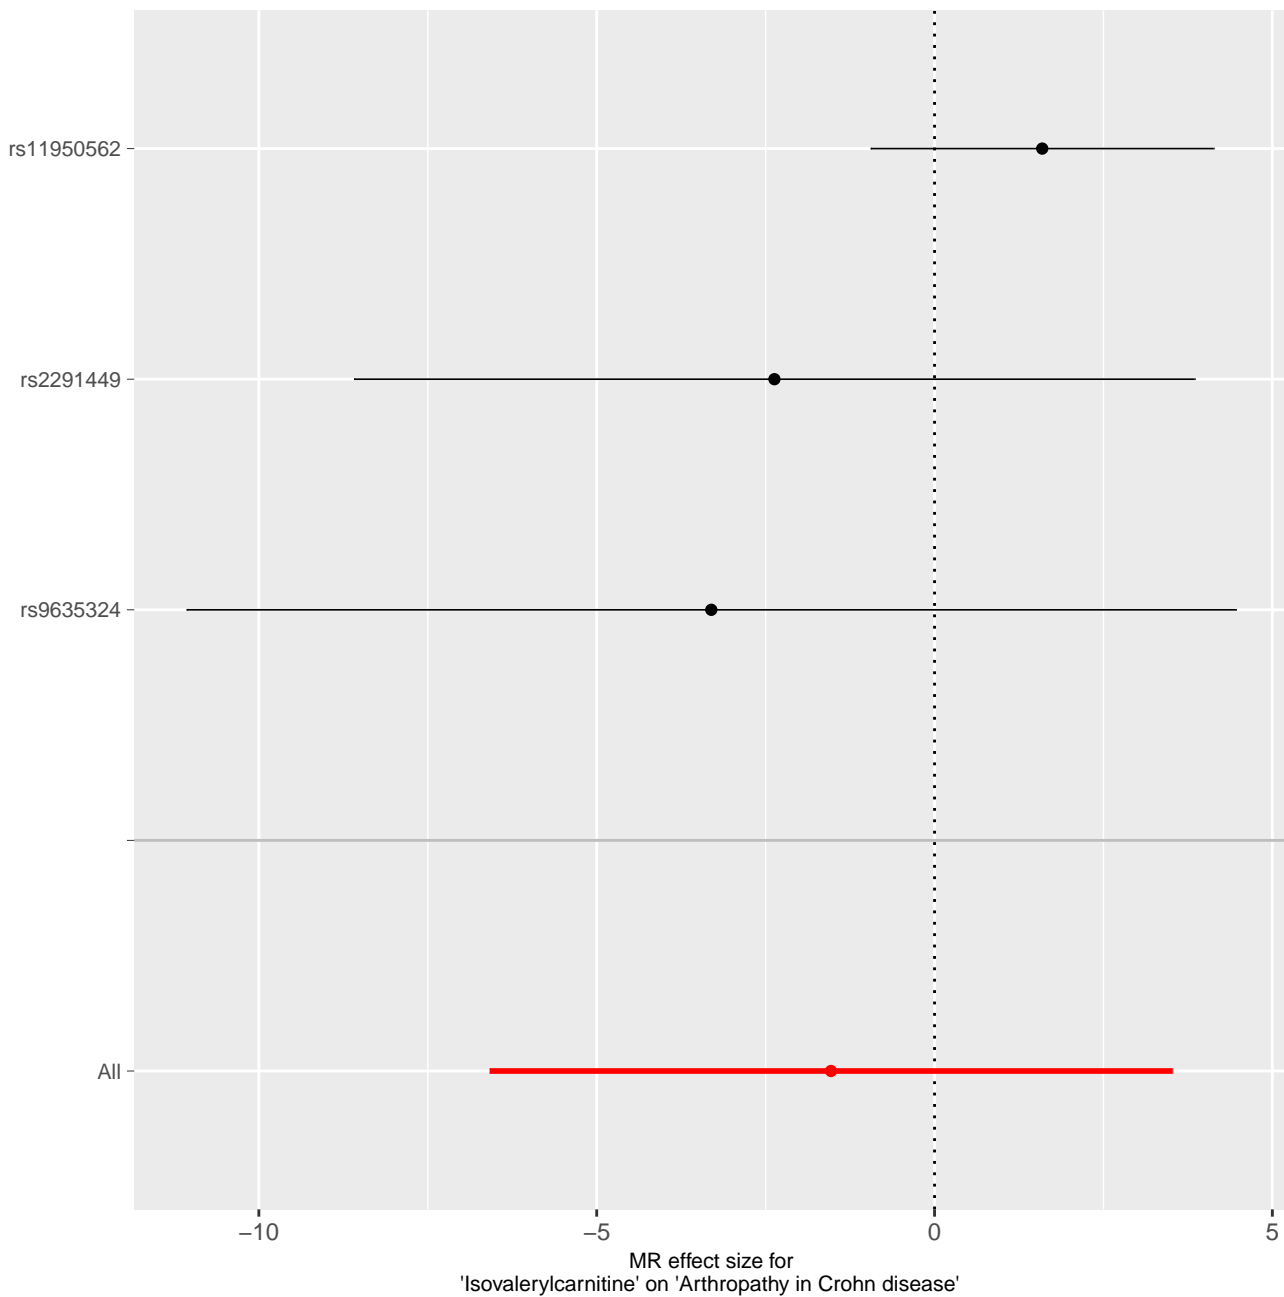

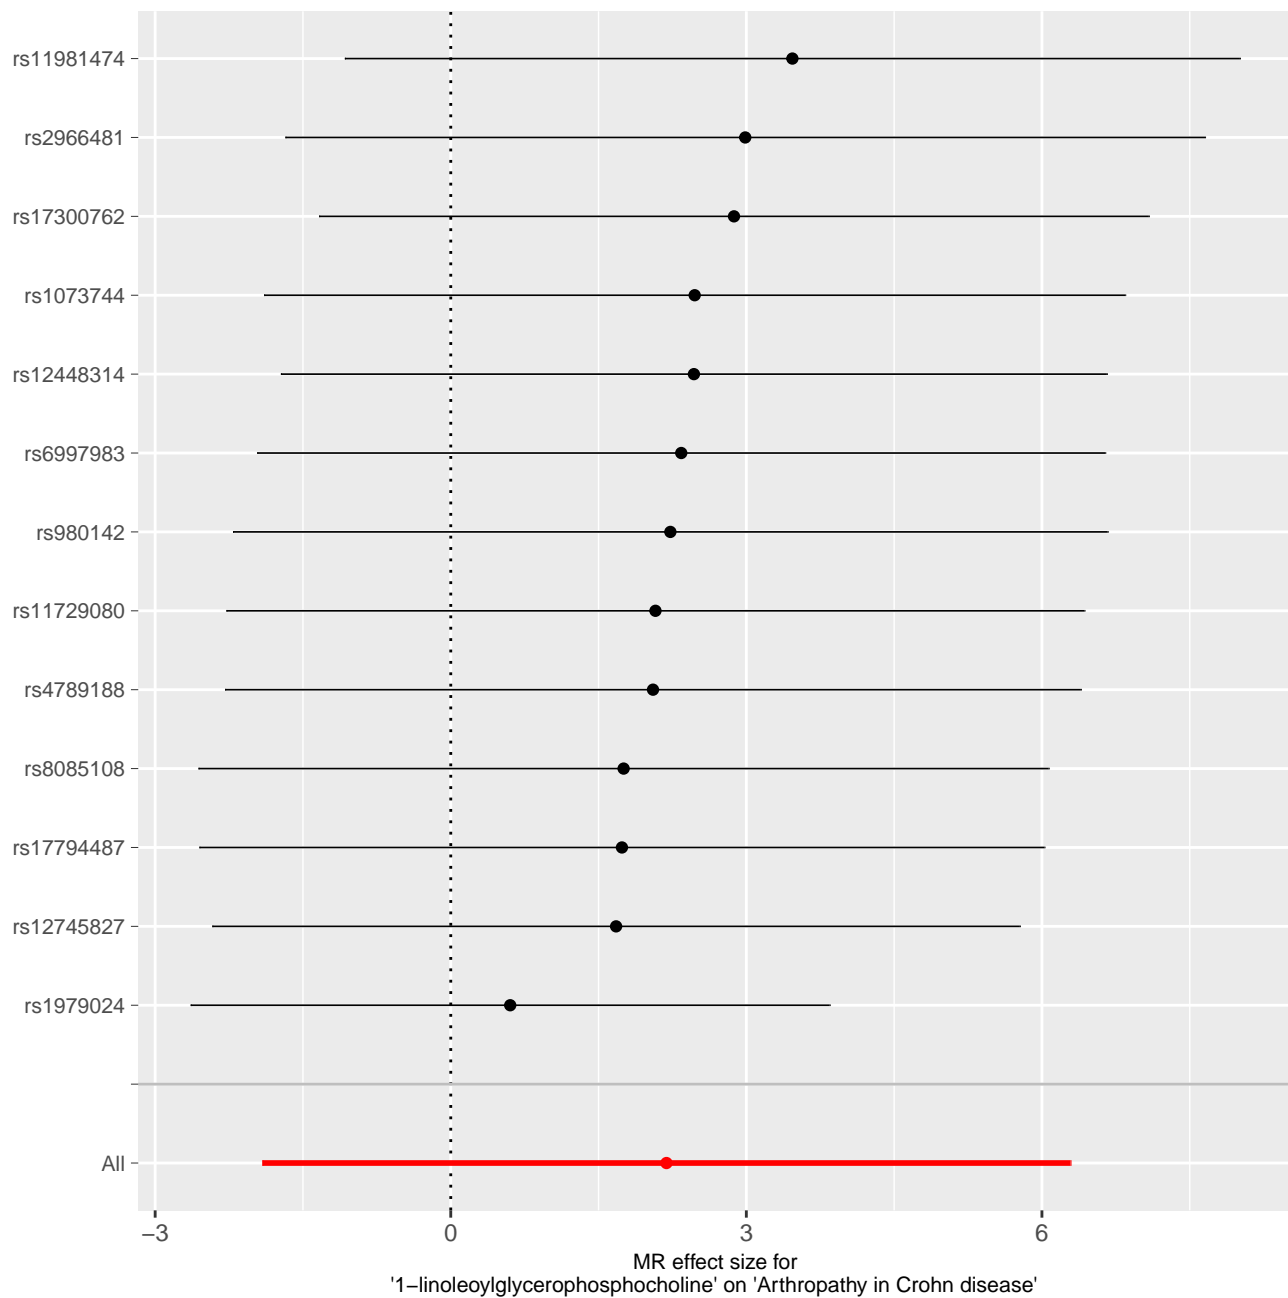

rs4253311

rs5030062

rs2731672

All

-2

-1

0

1

MR effect size for  
'Bradykinin, des-arg(9)' on 'Arthropathy in Crohn disease'

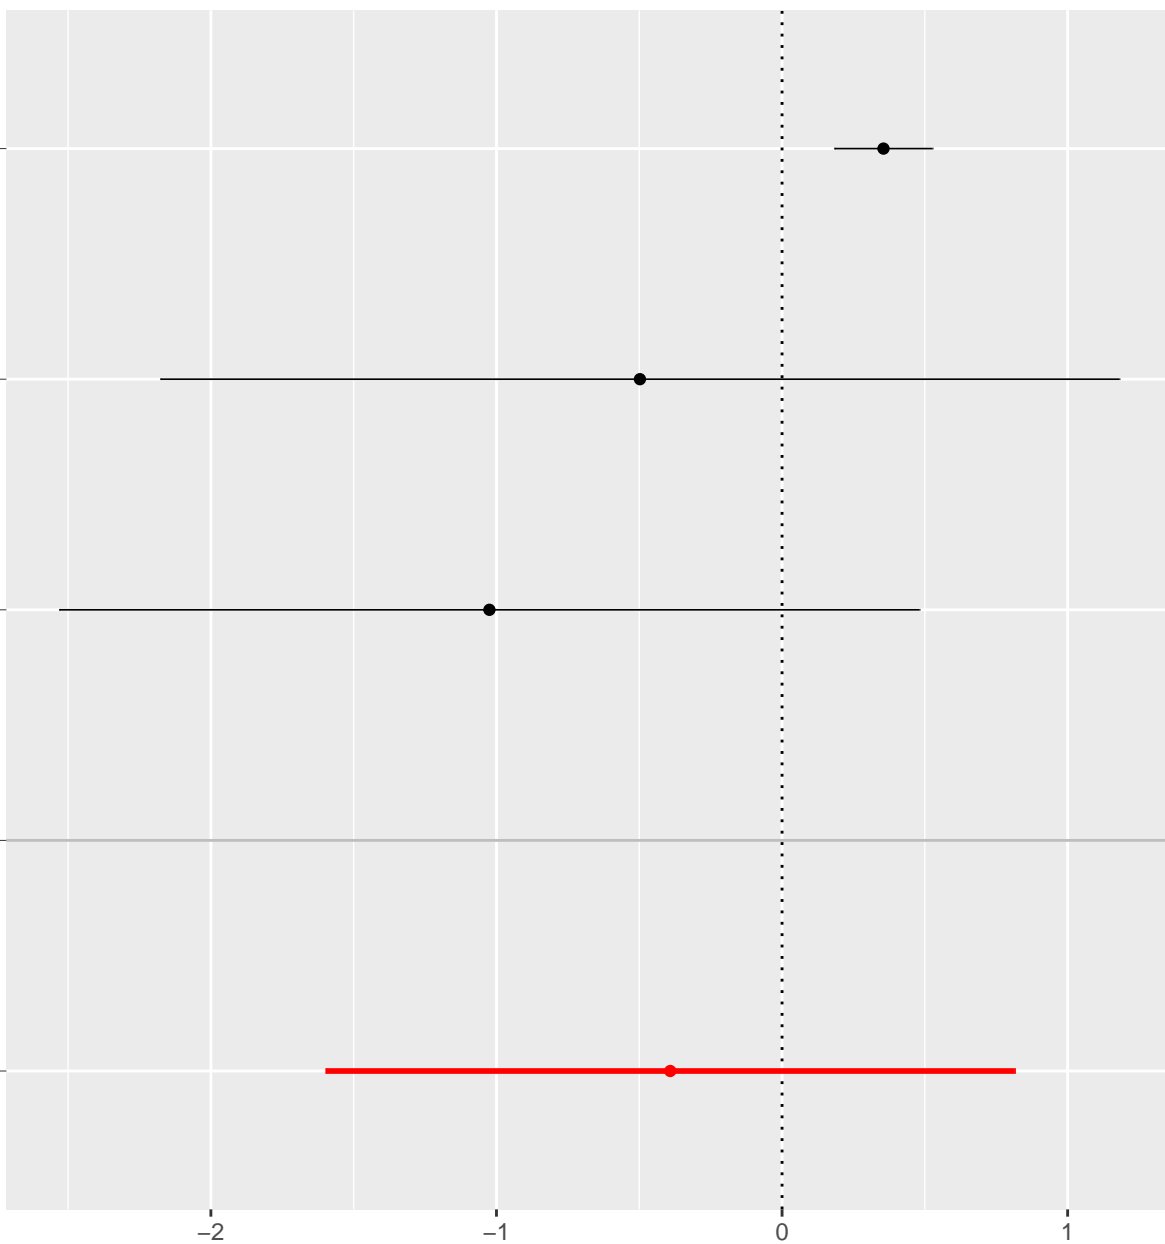

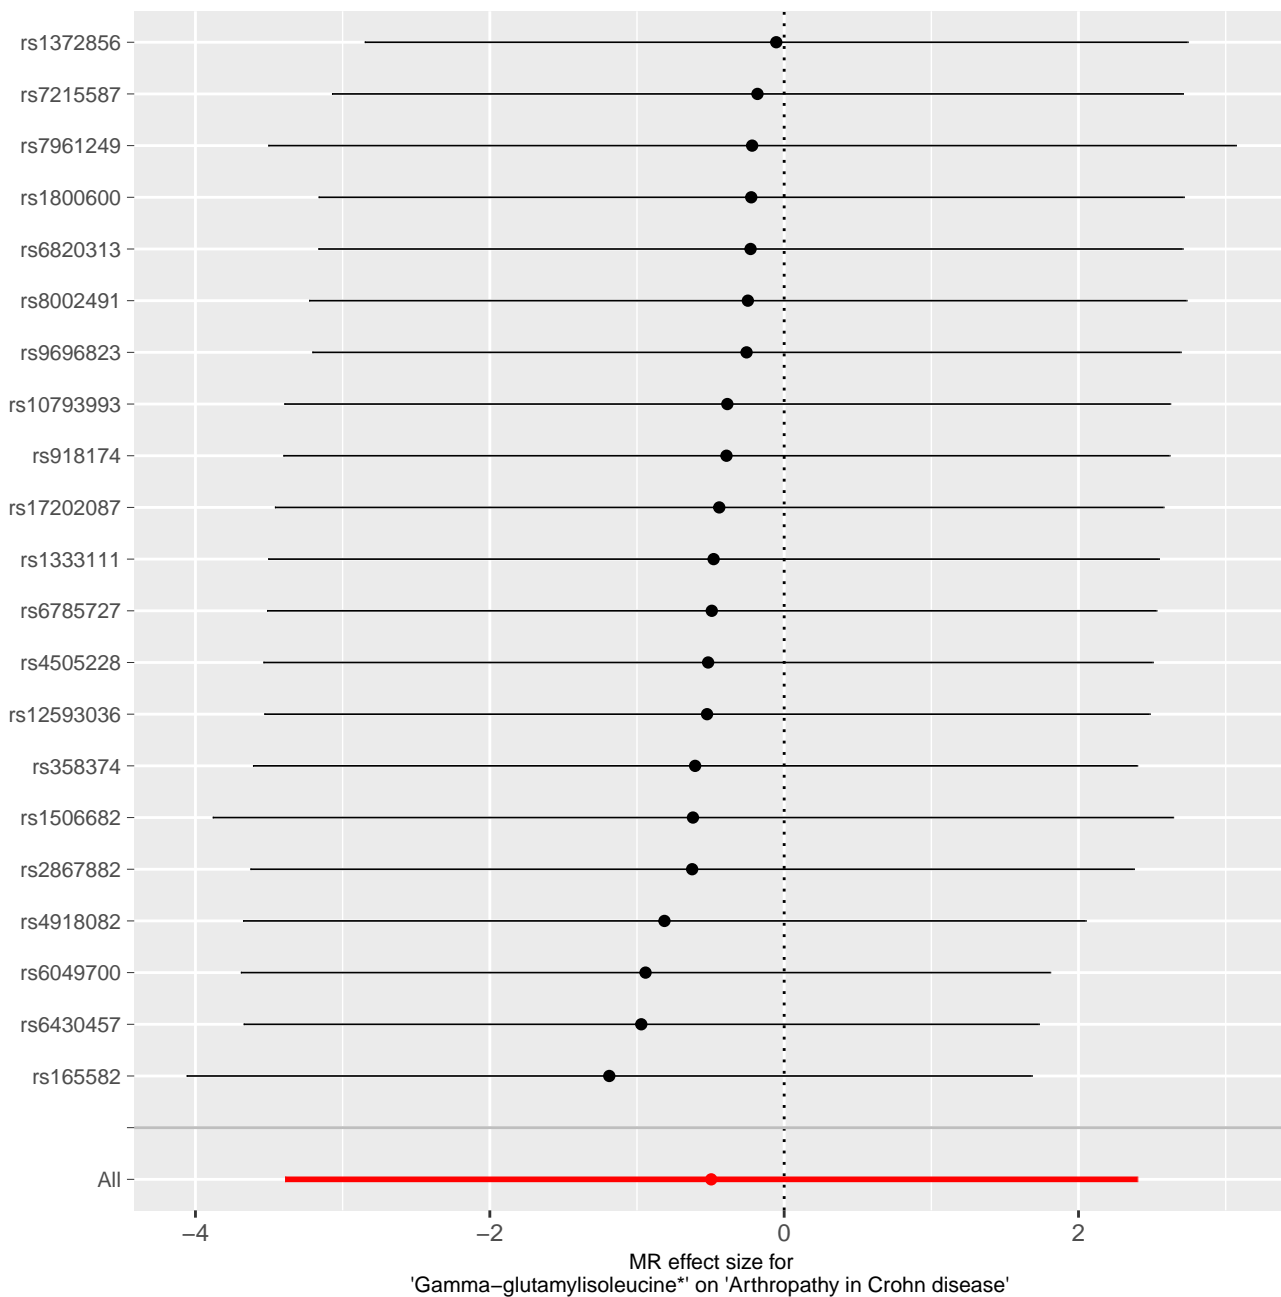



rs6907935

rs4680092

rs1456197

rs4861137

All

-10

-5

0

MR effect size for  
'Isovalerate' on 'Arthropathy in Crohn disease'

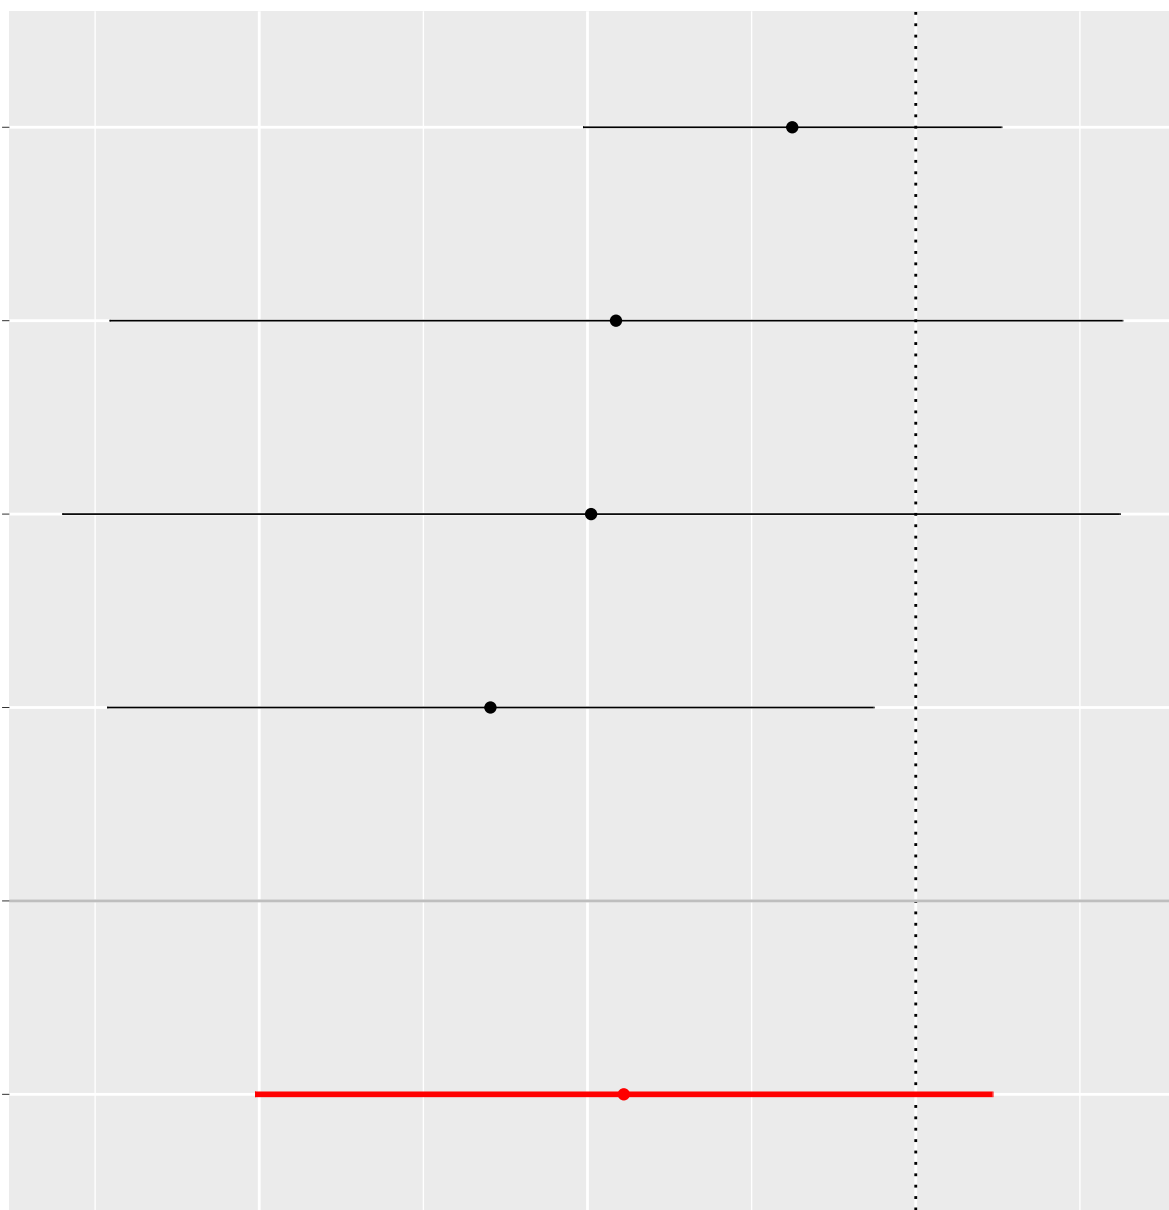

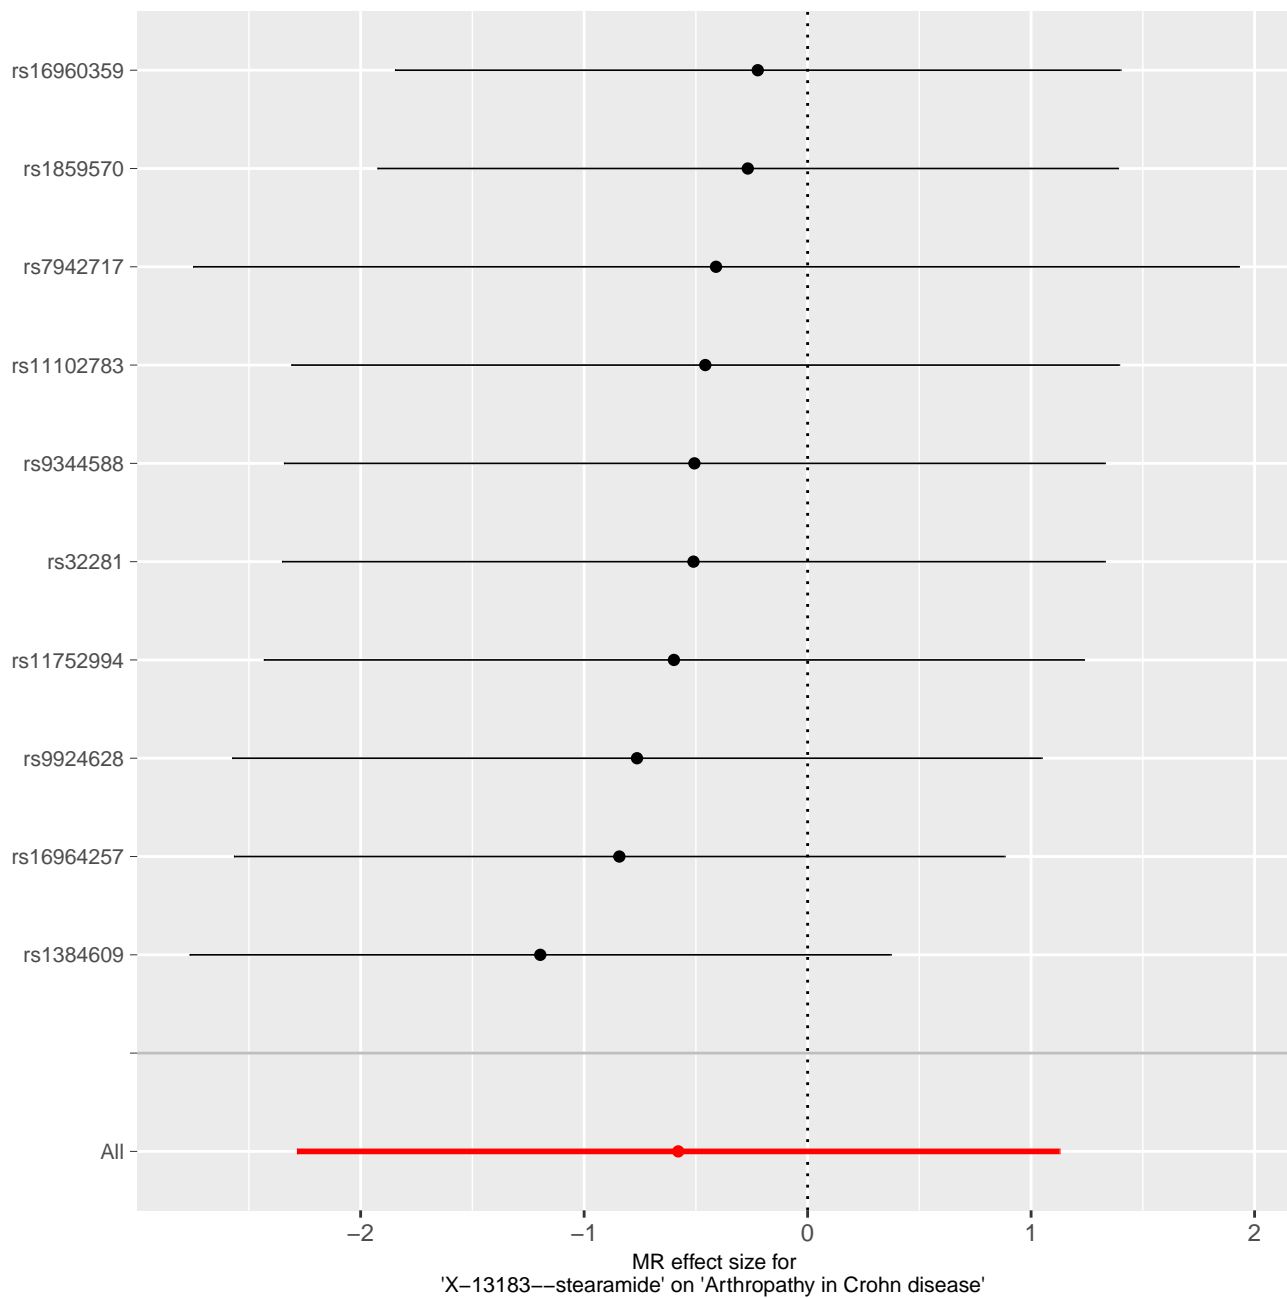

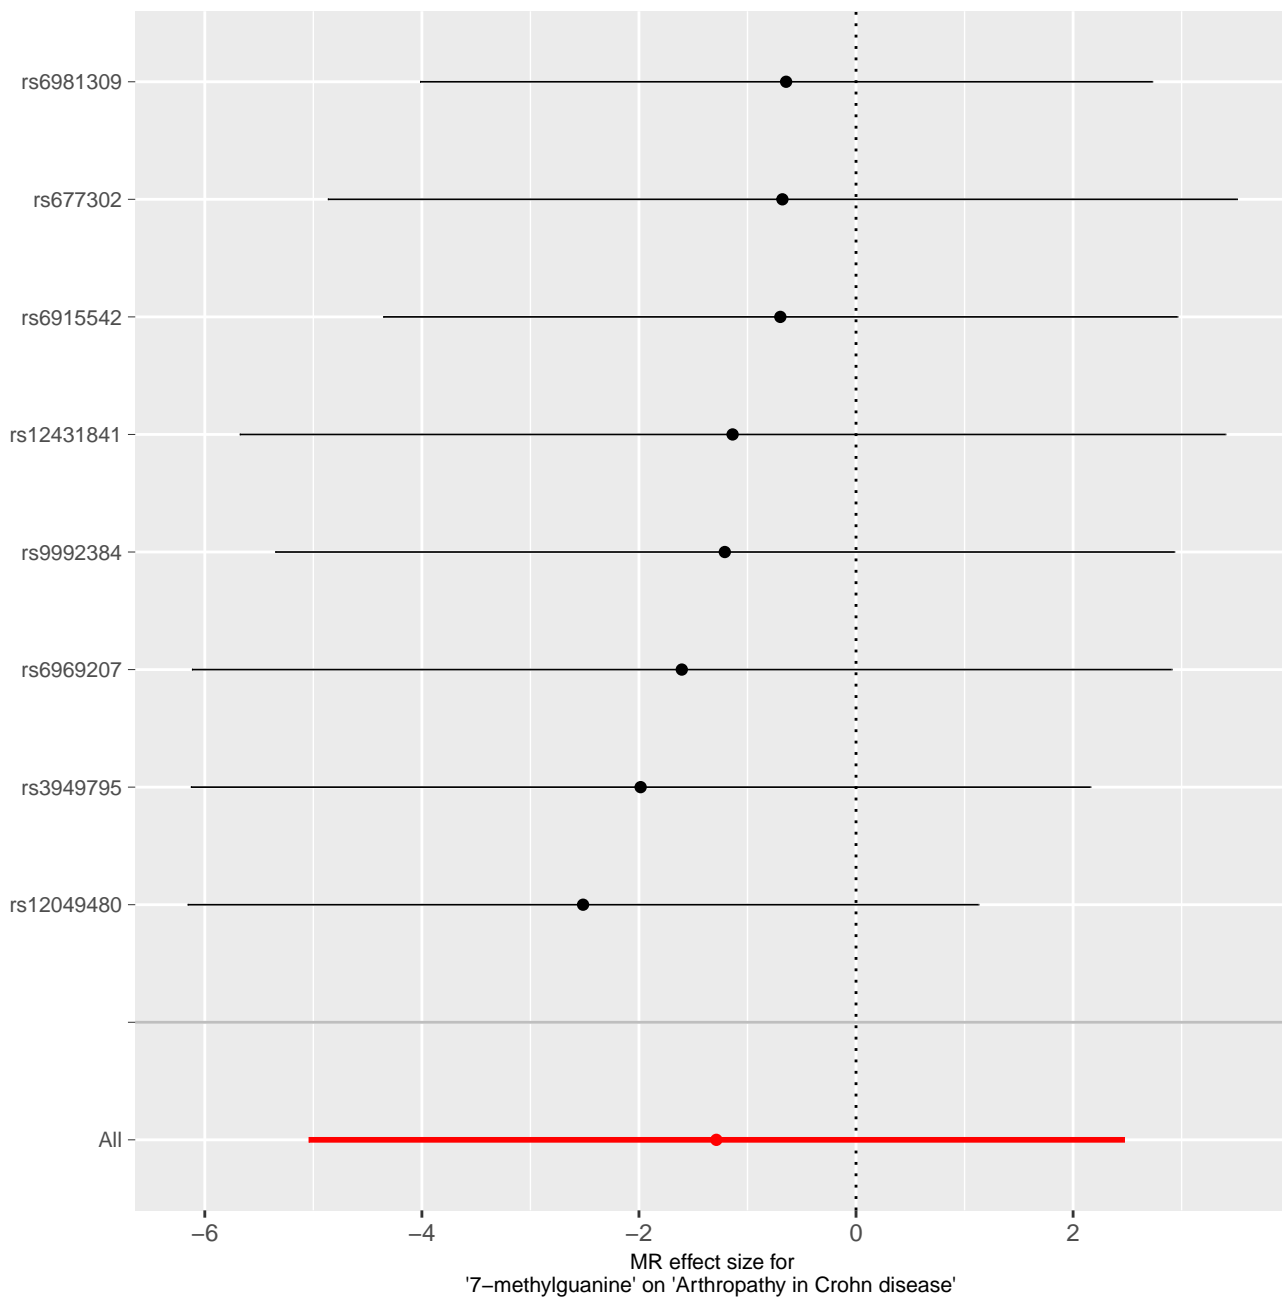

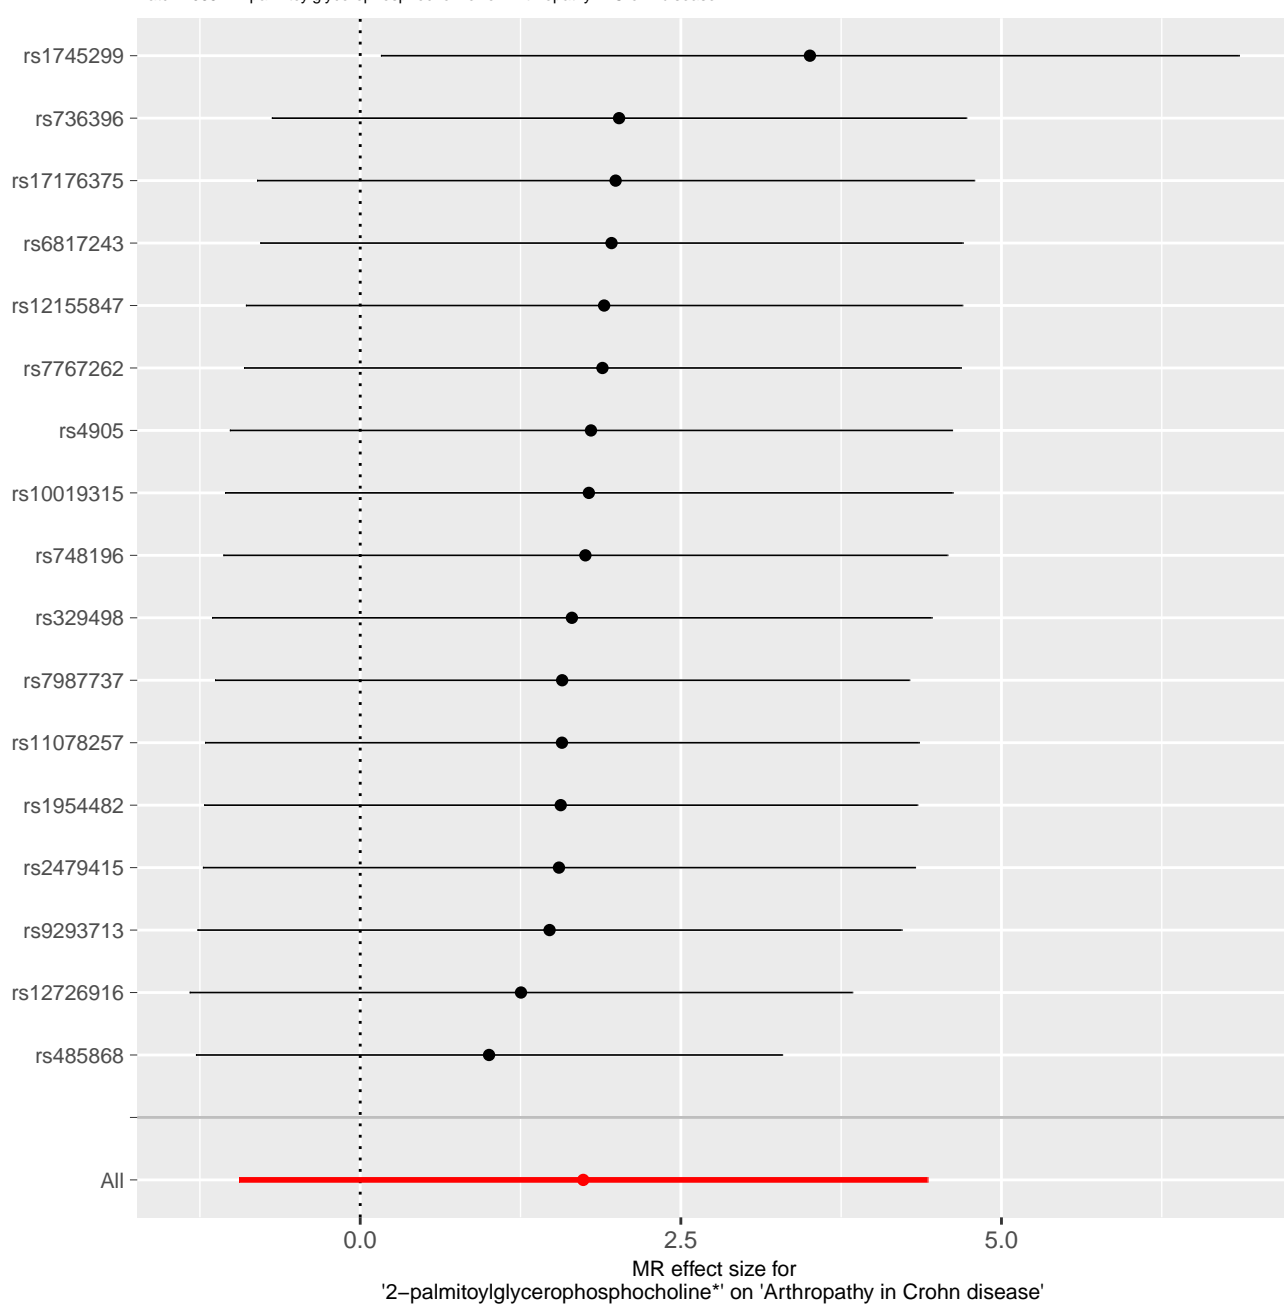

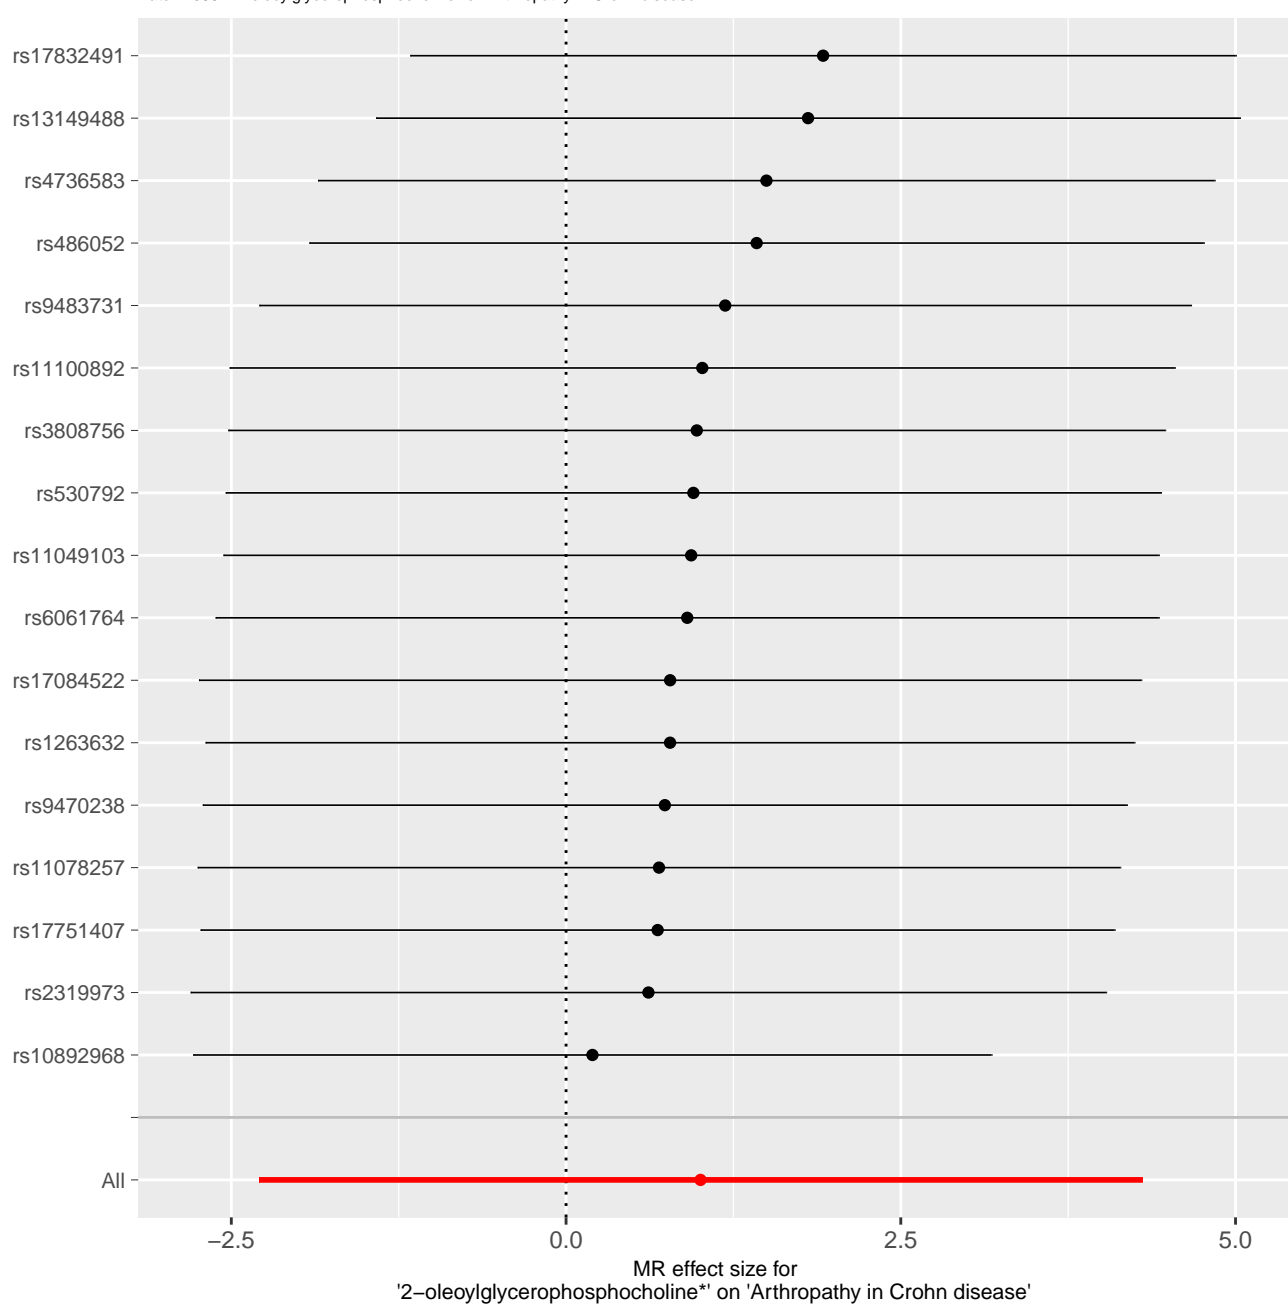

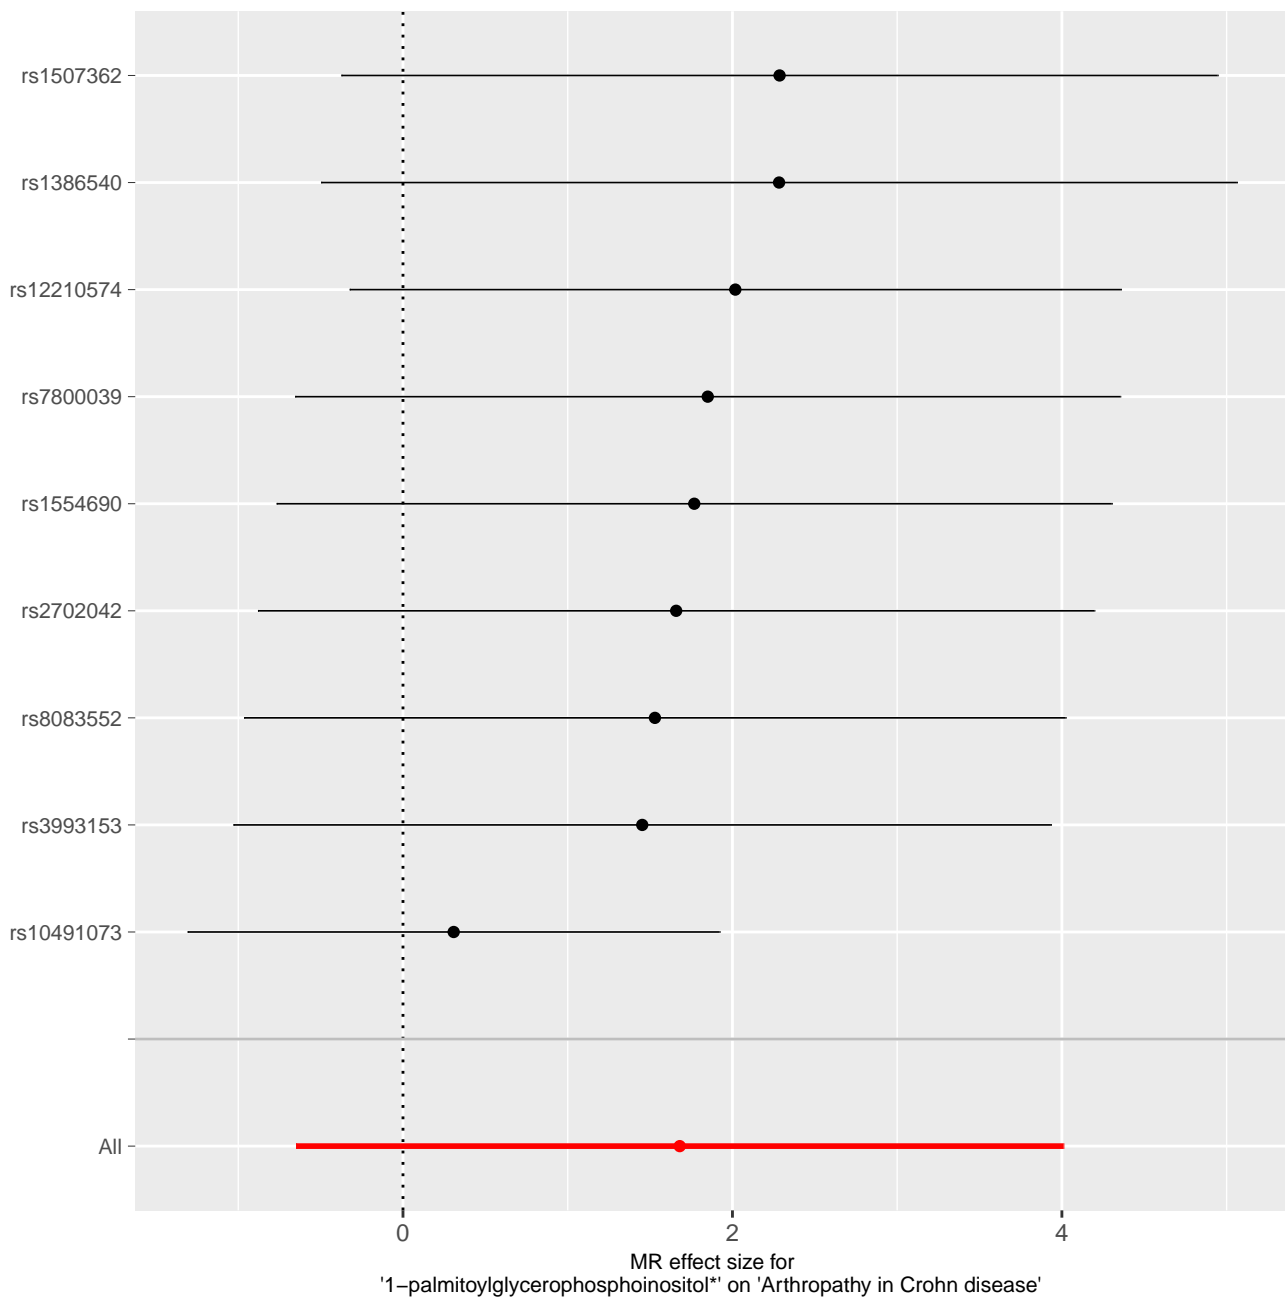

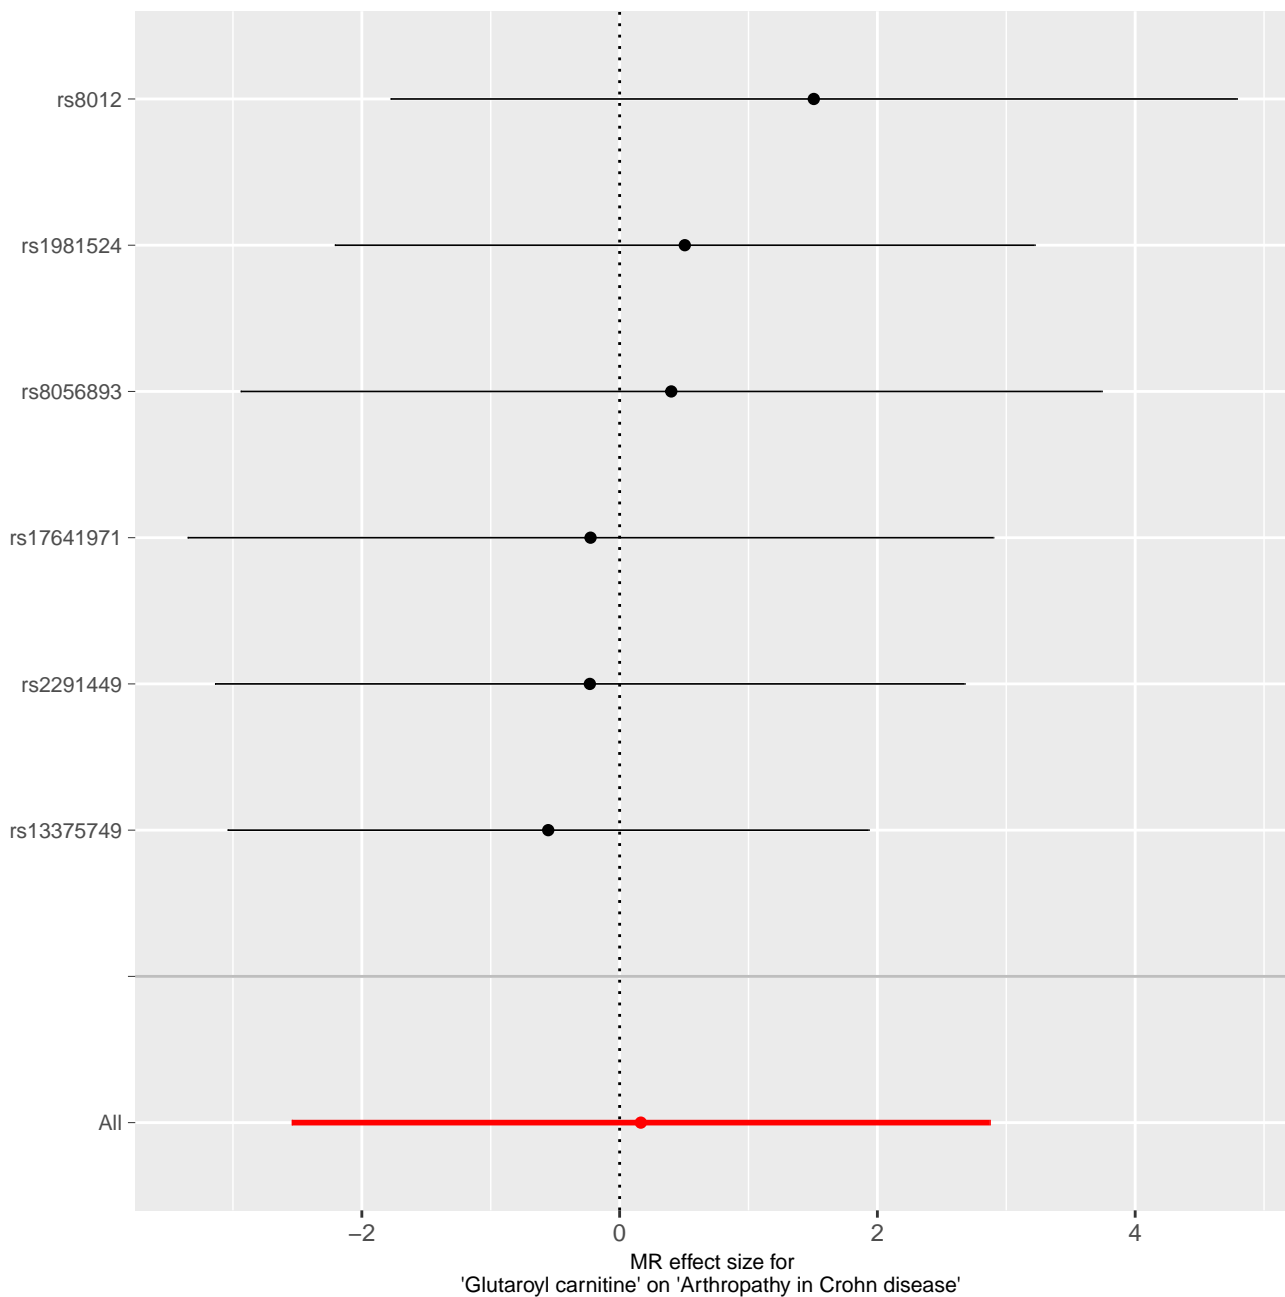

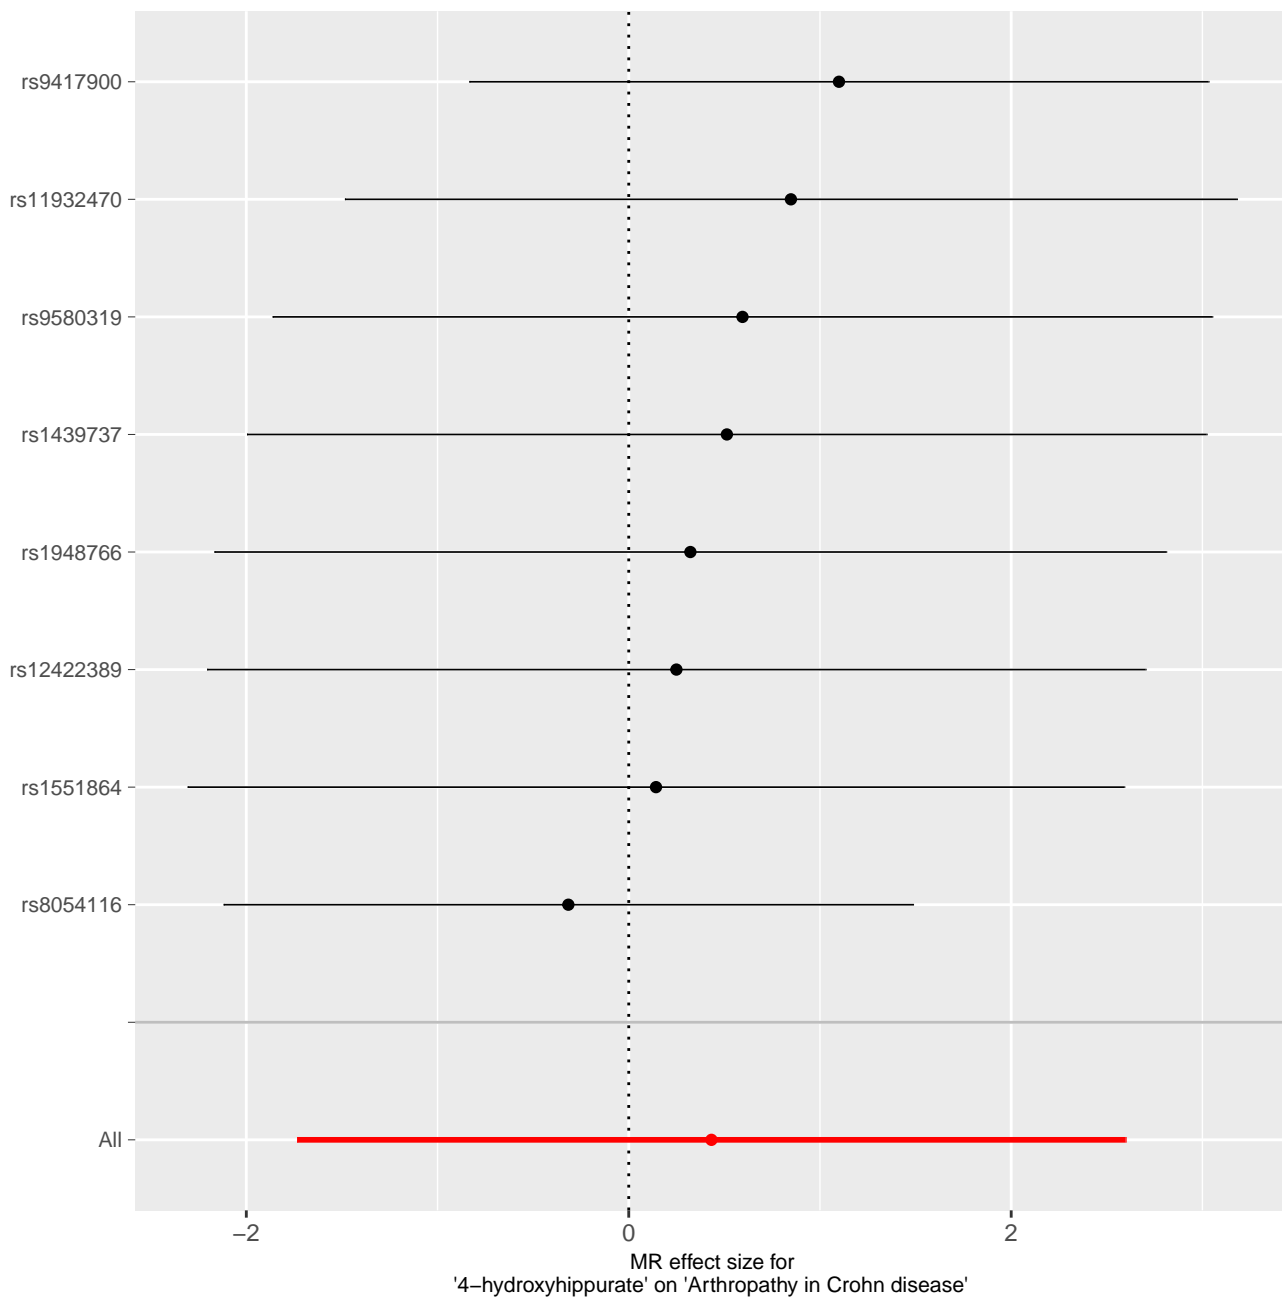



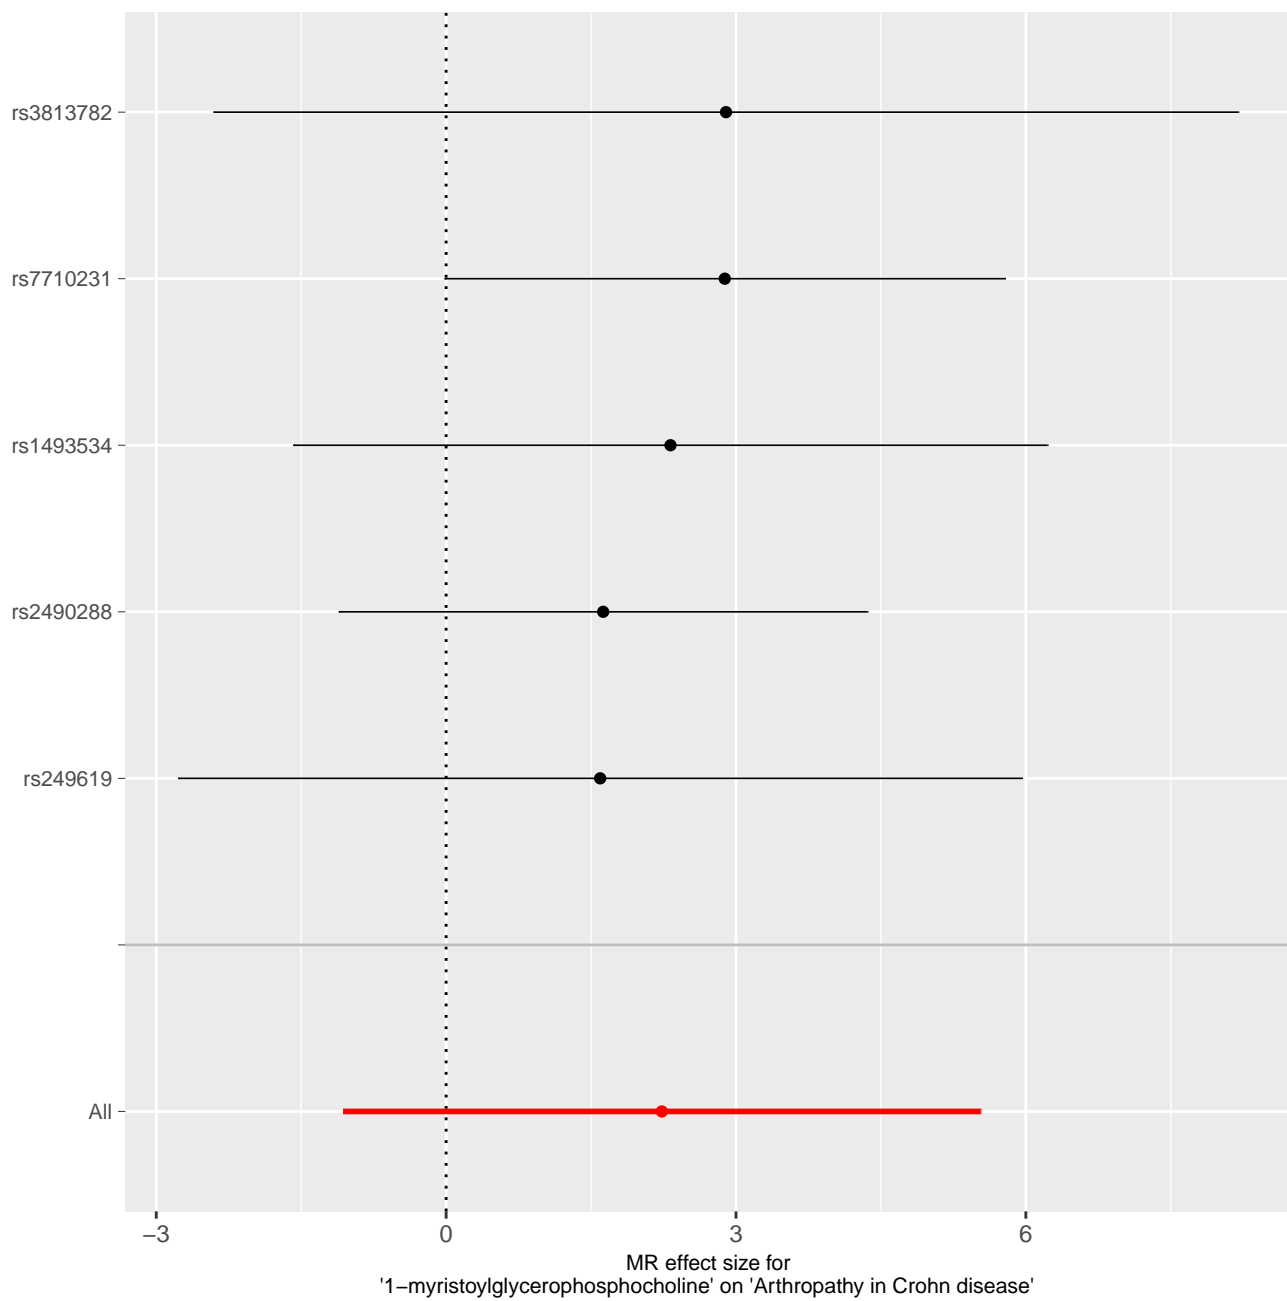

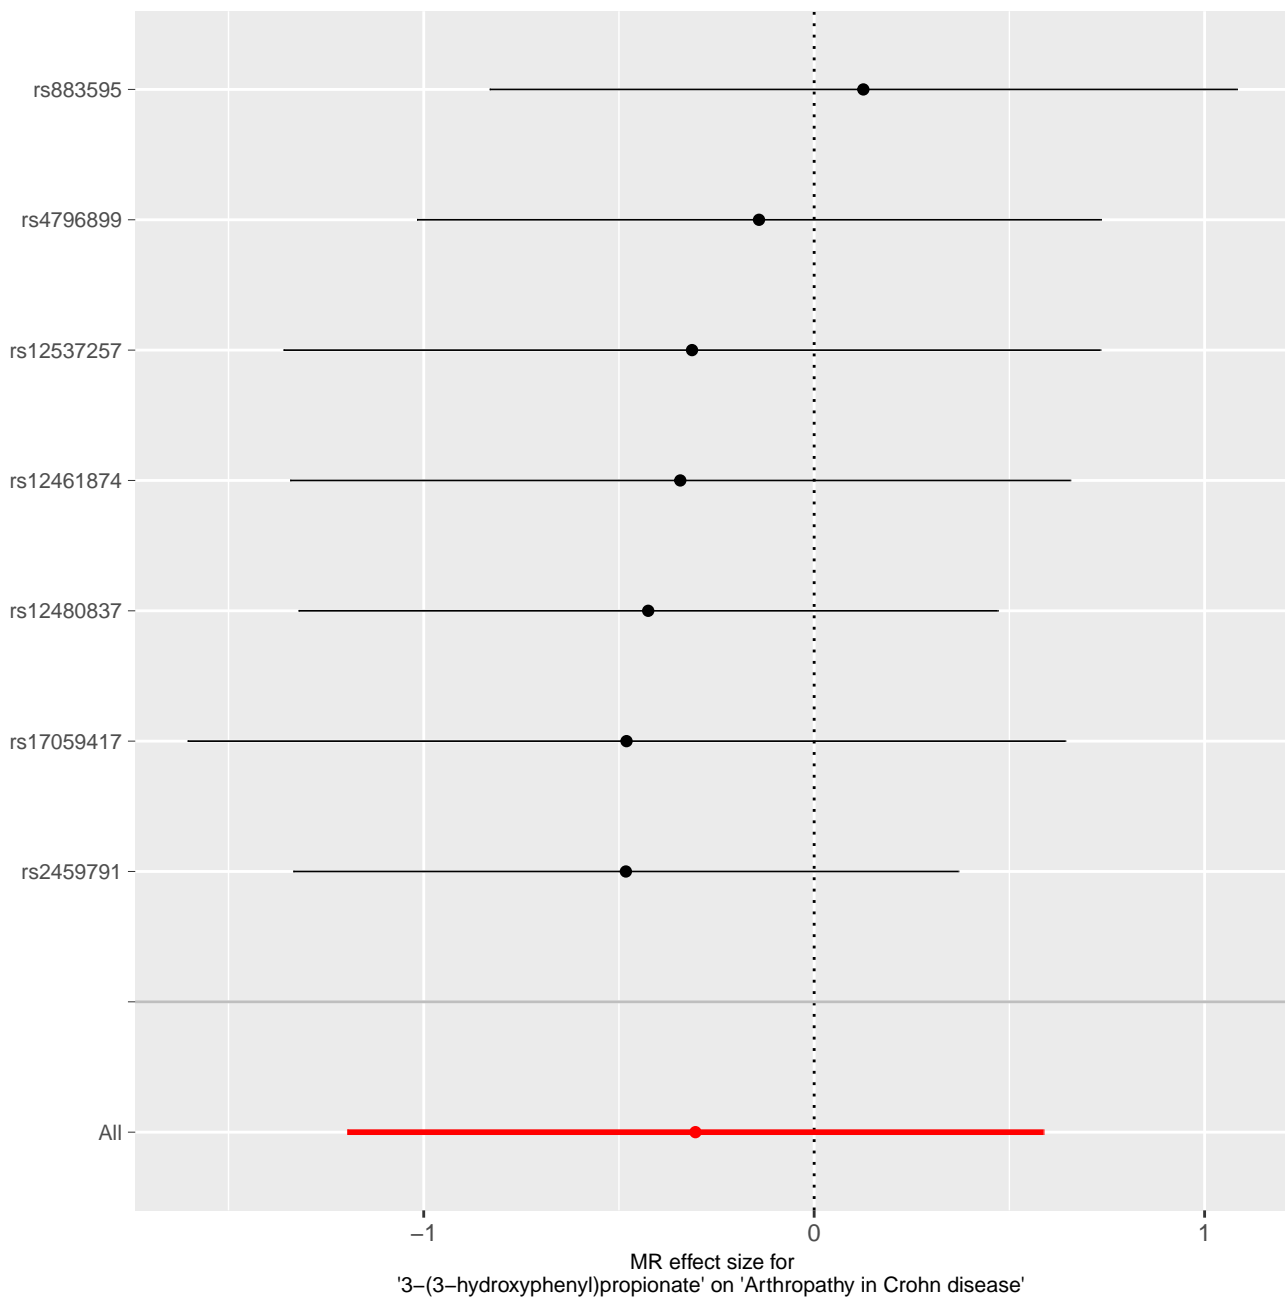

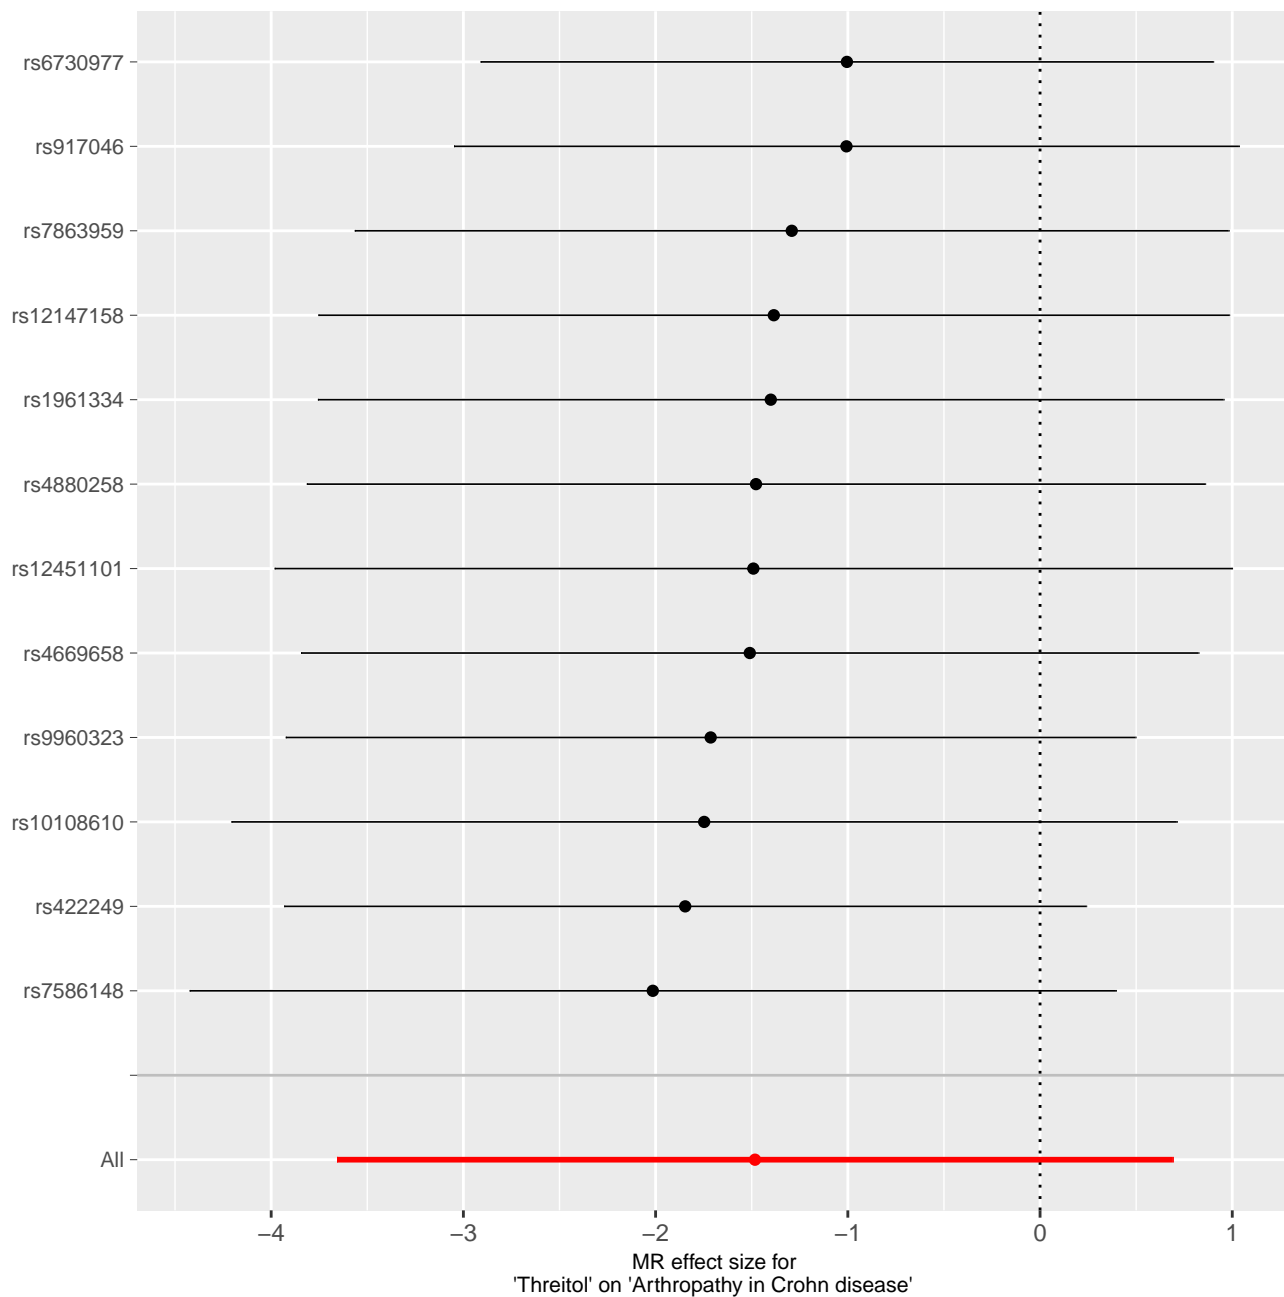

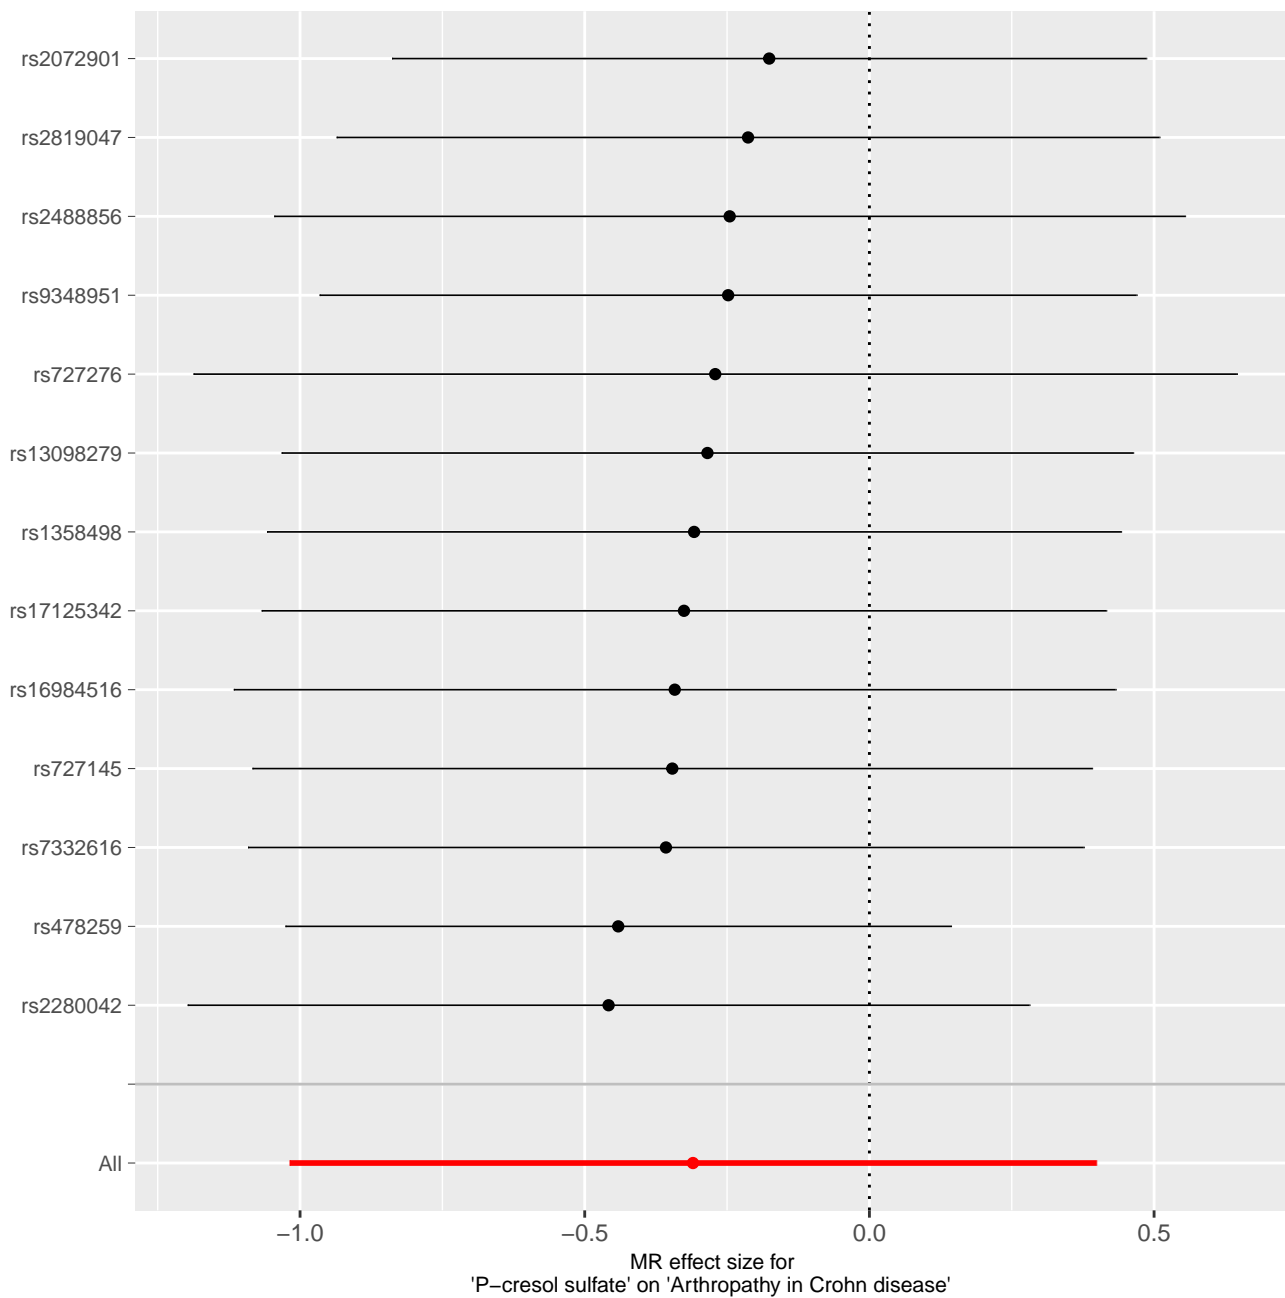

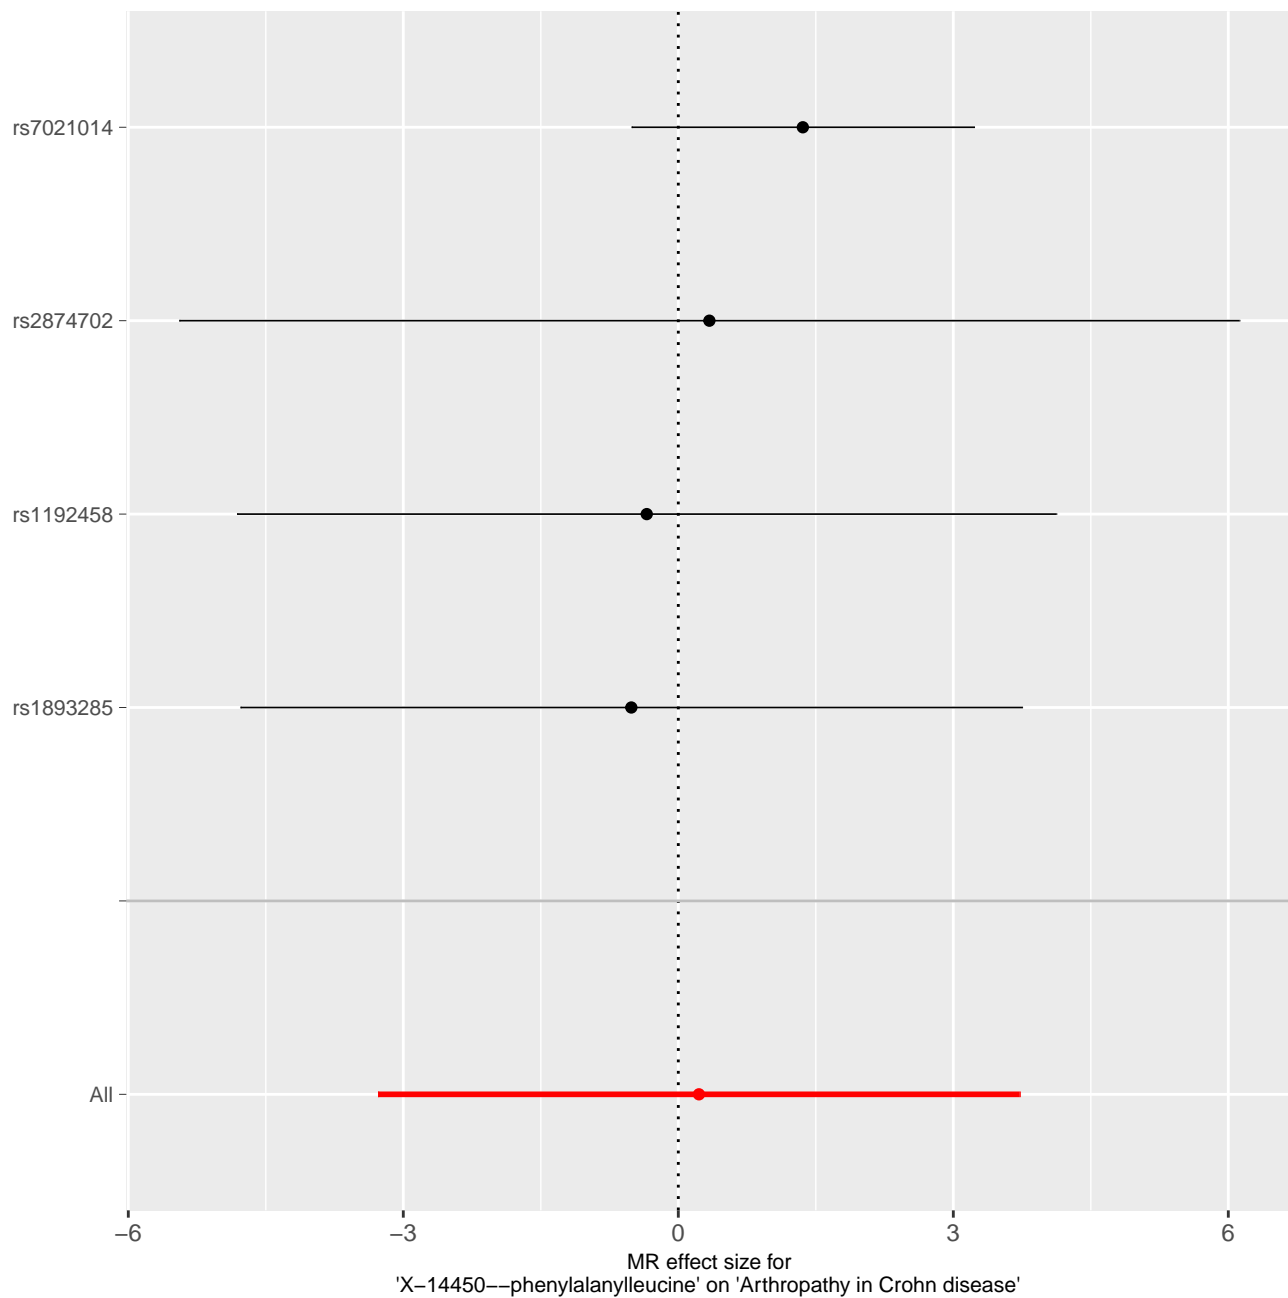

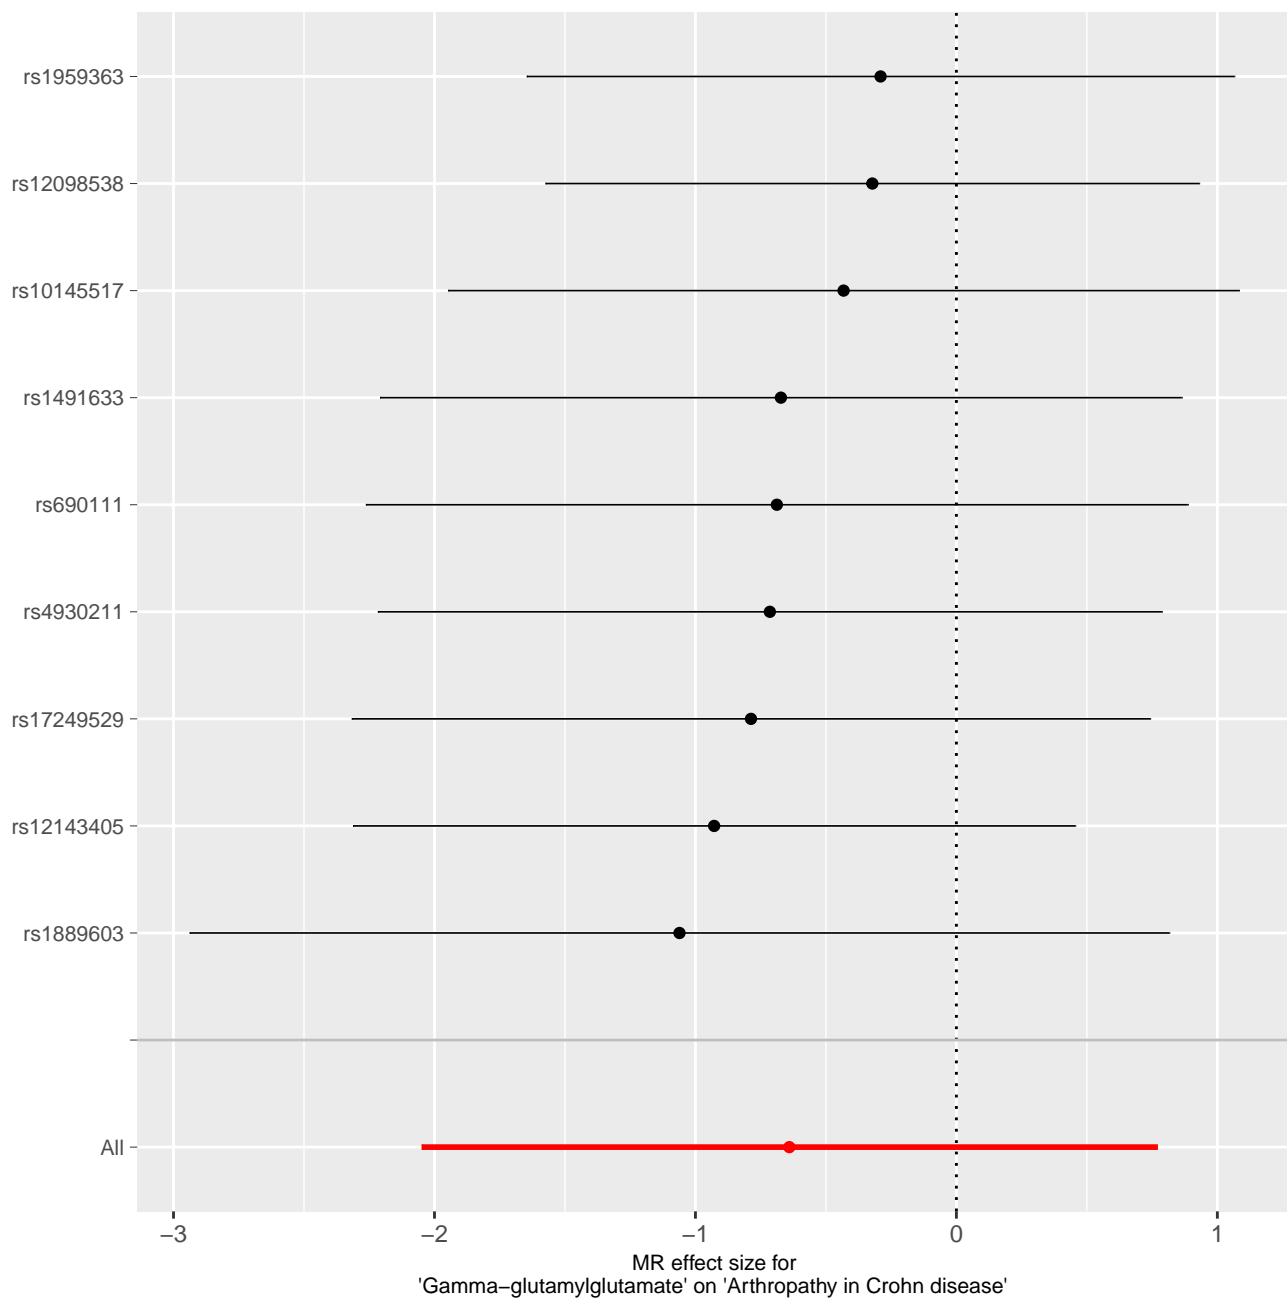

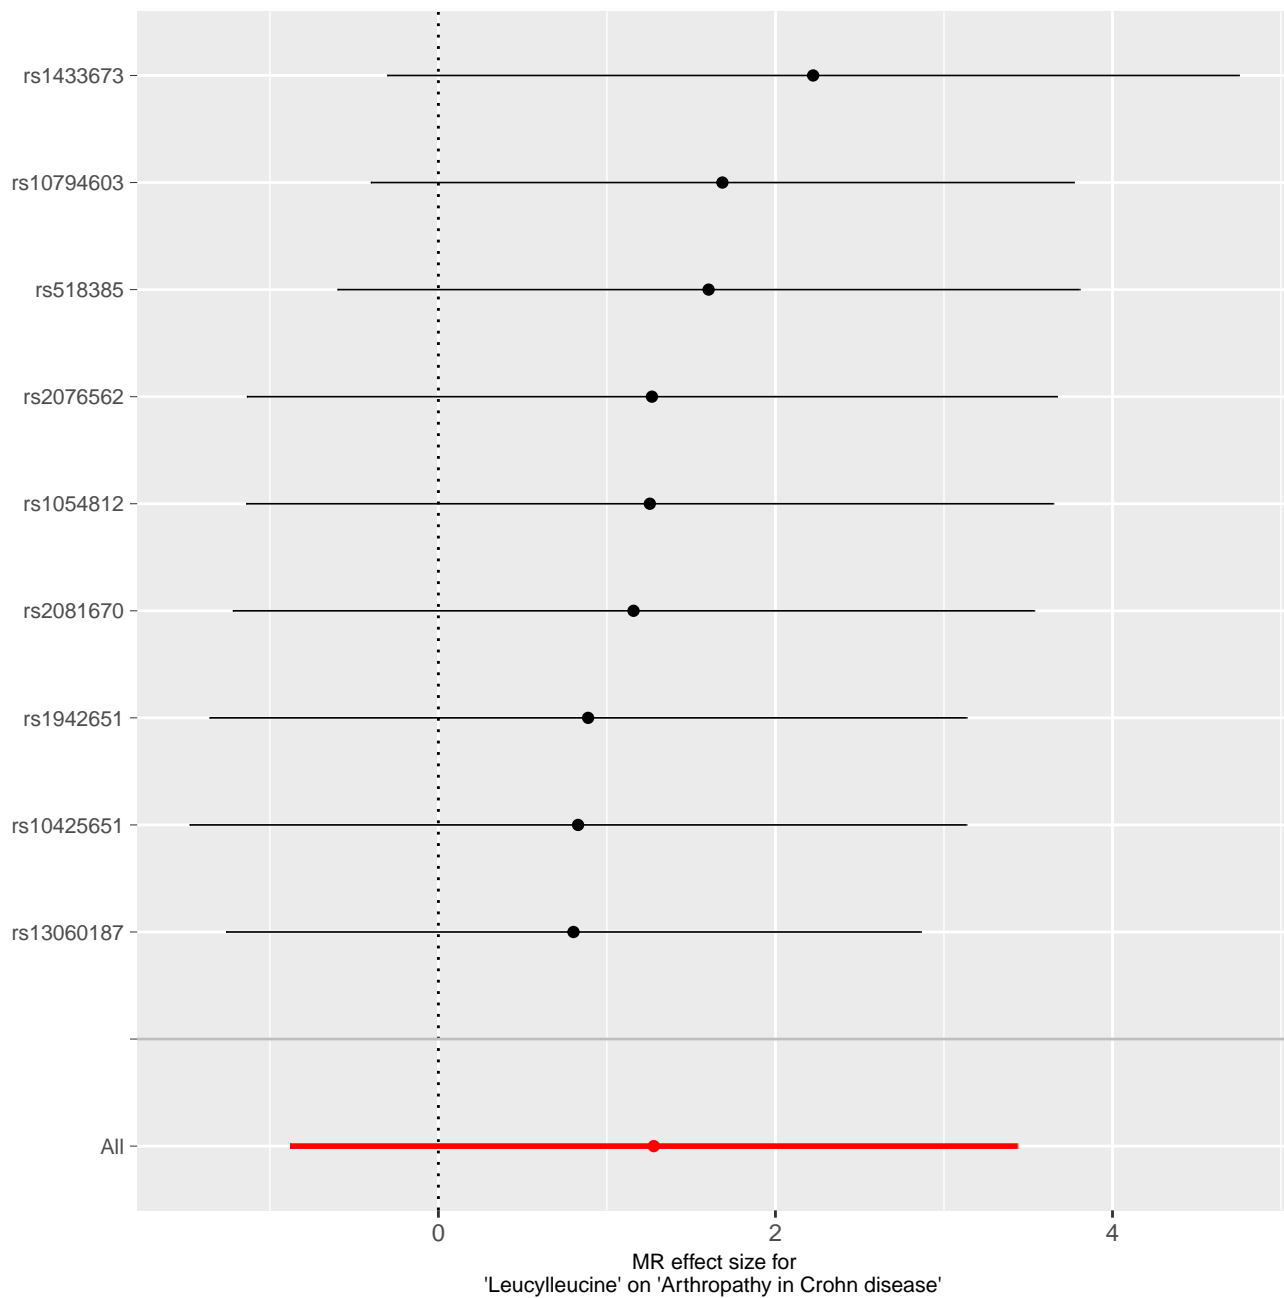

Batch 1083 : 7- $\alpha$ -hydroxy-3-oxo-4-cholestenoate (7-Hoca) on Arthropathy in Crohn disease

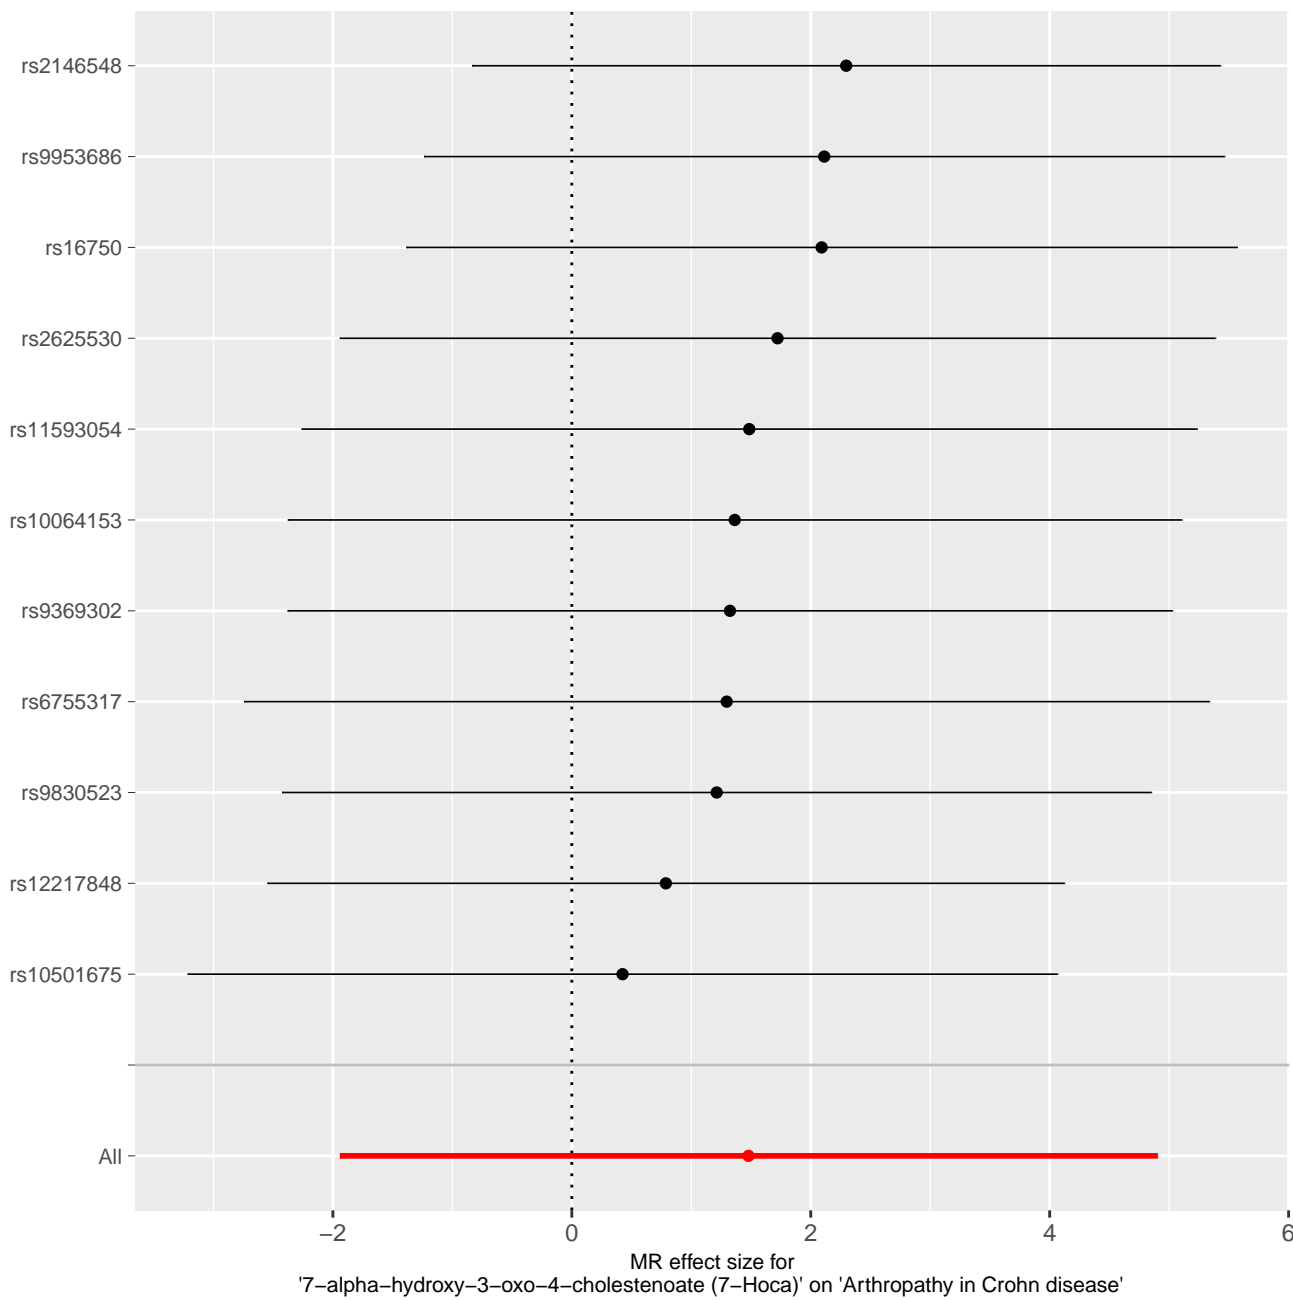



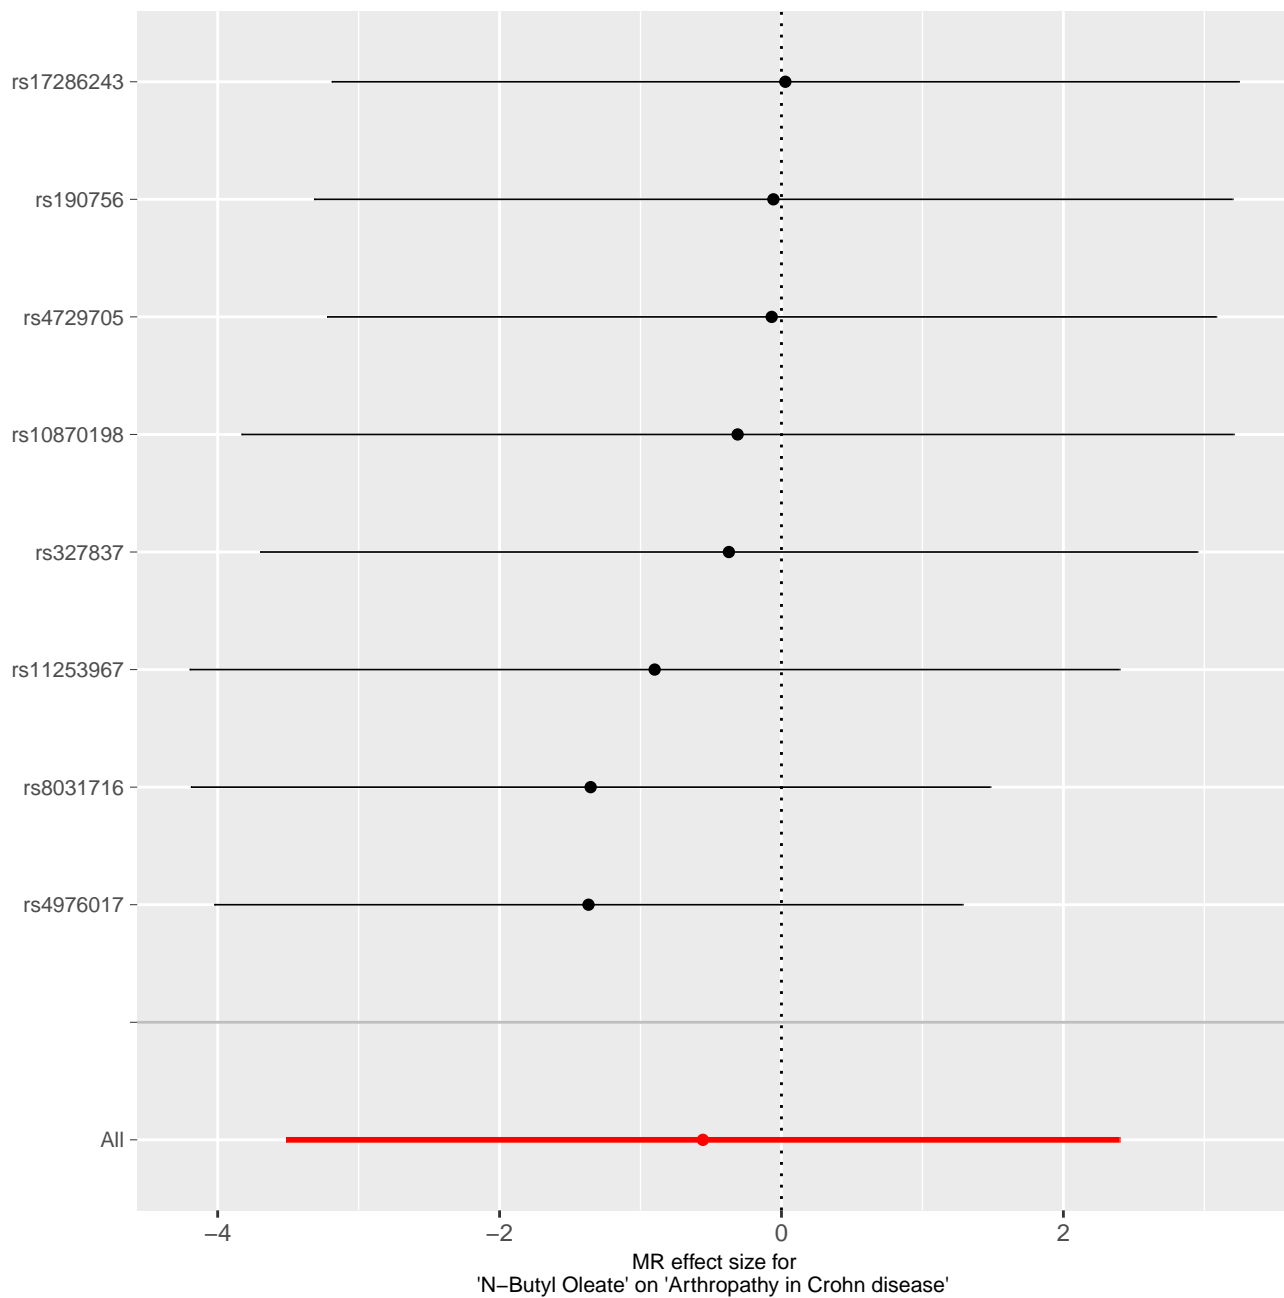

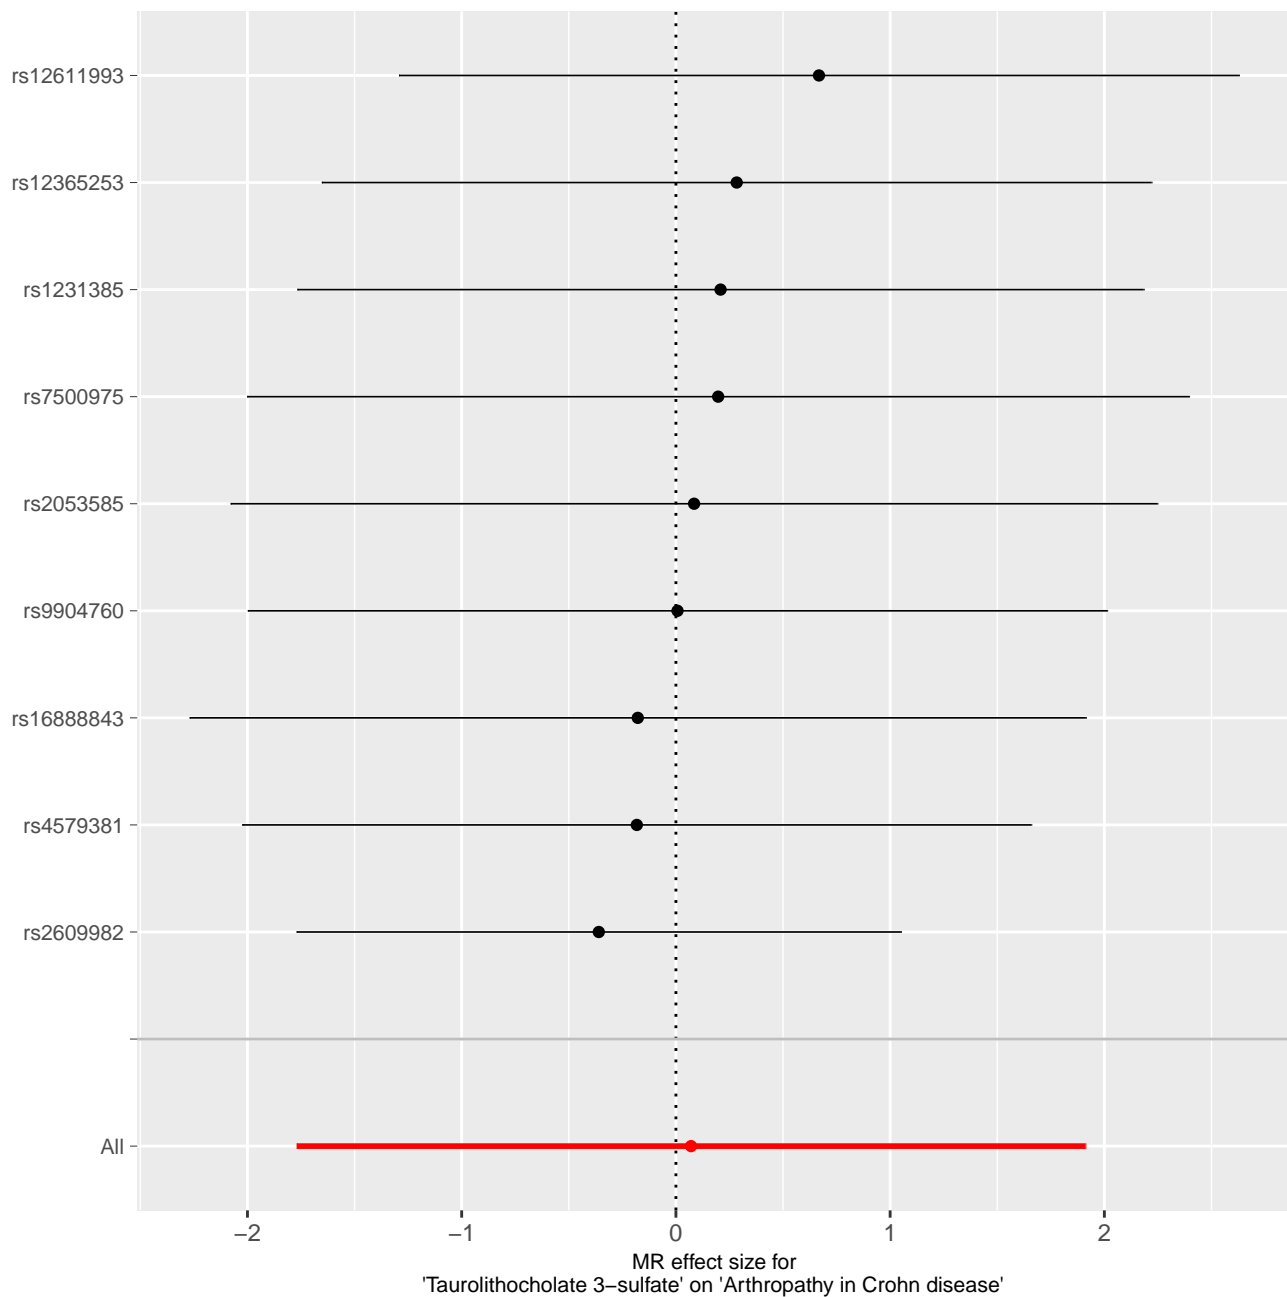

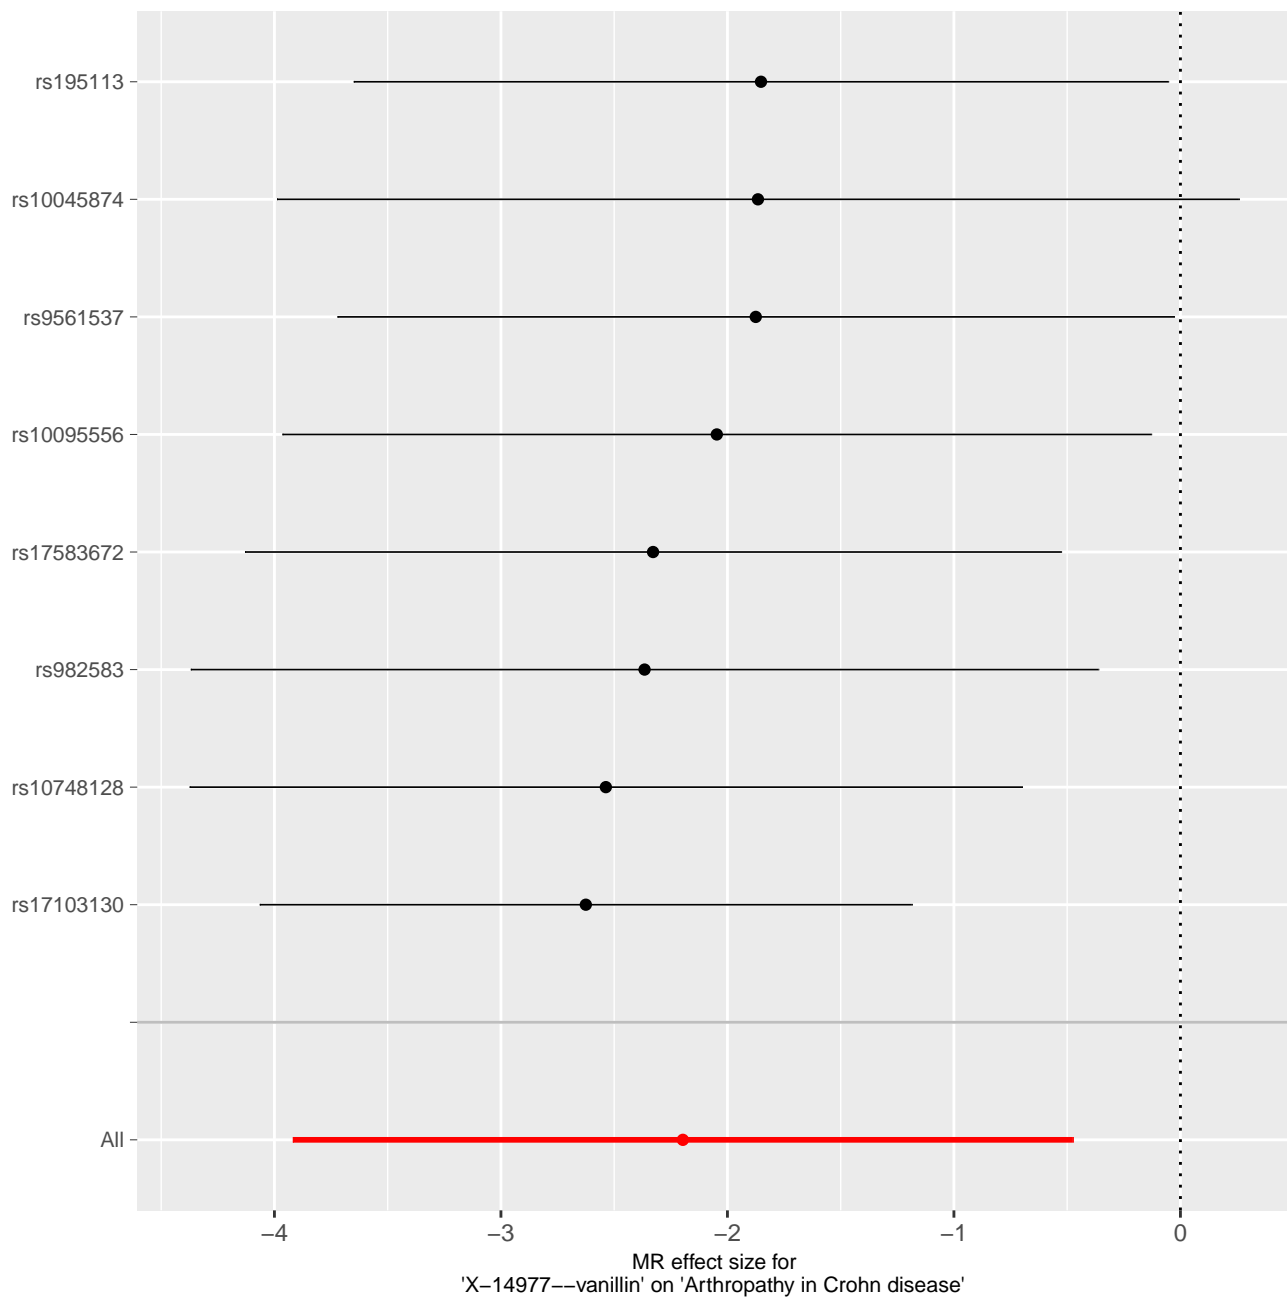

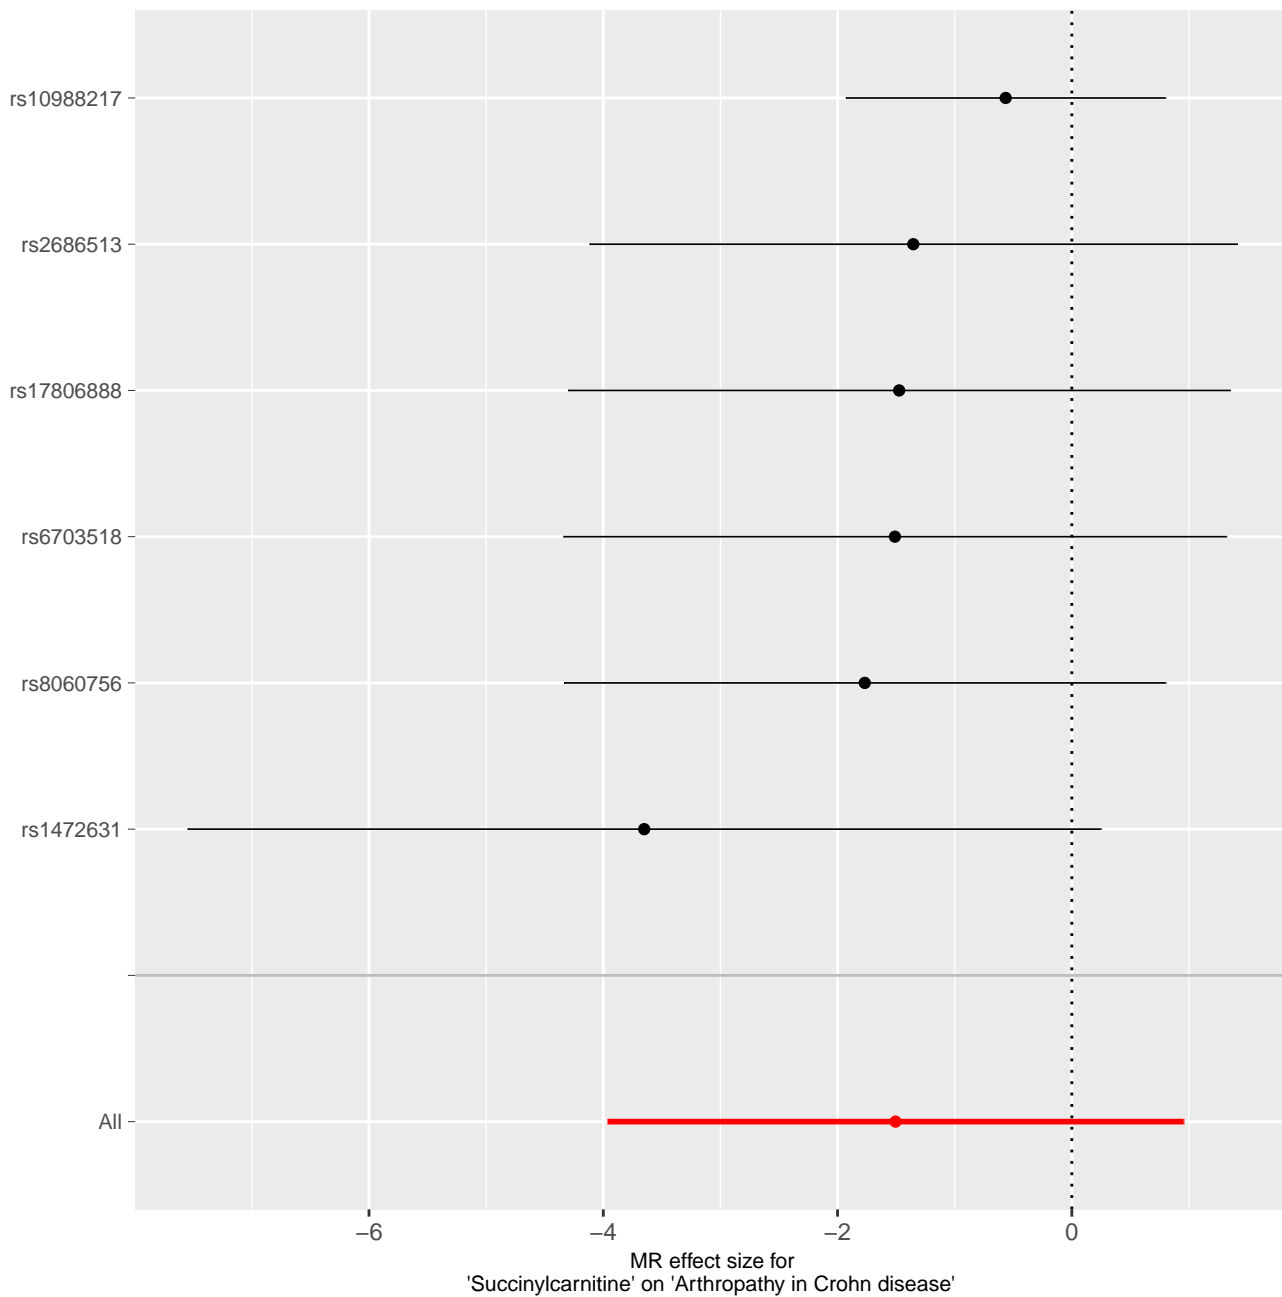

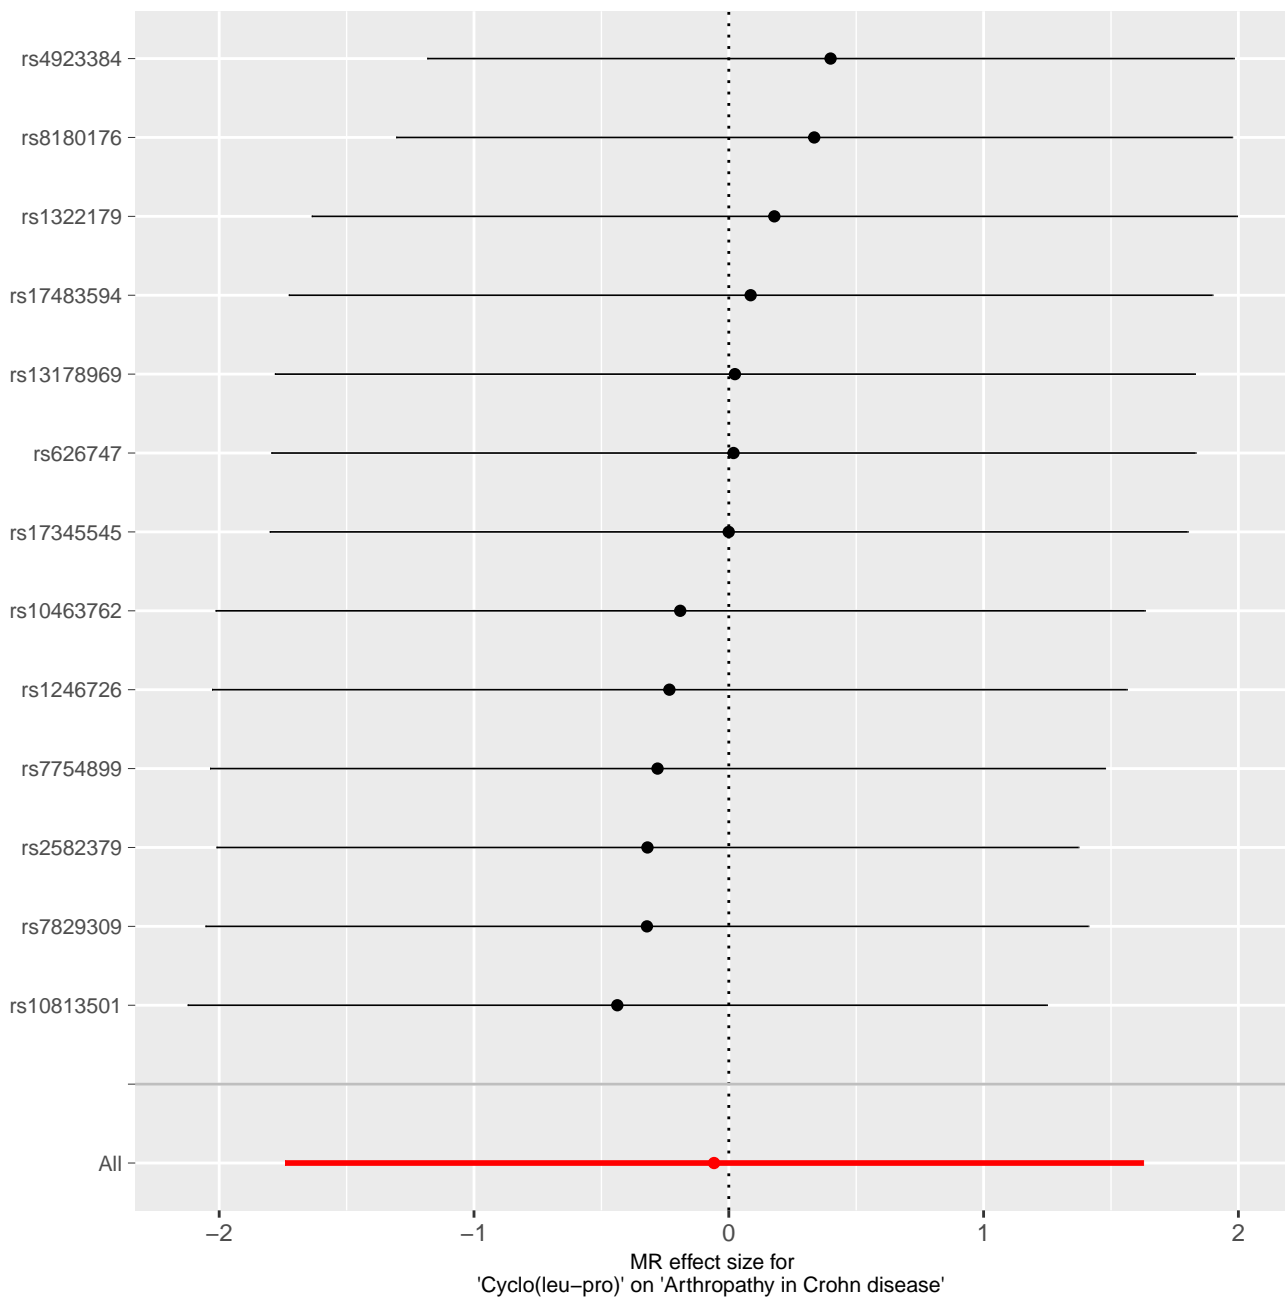

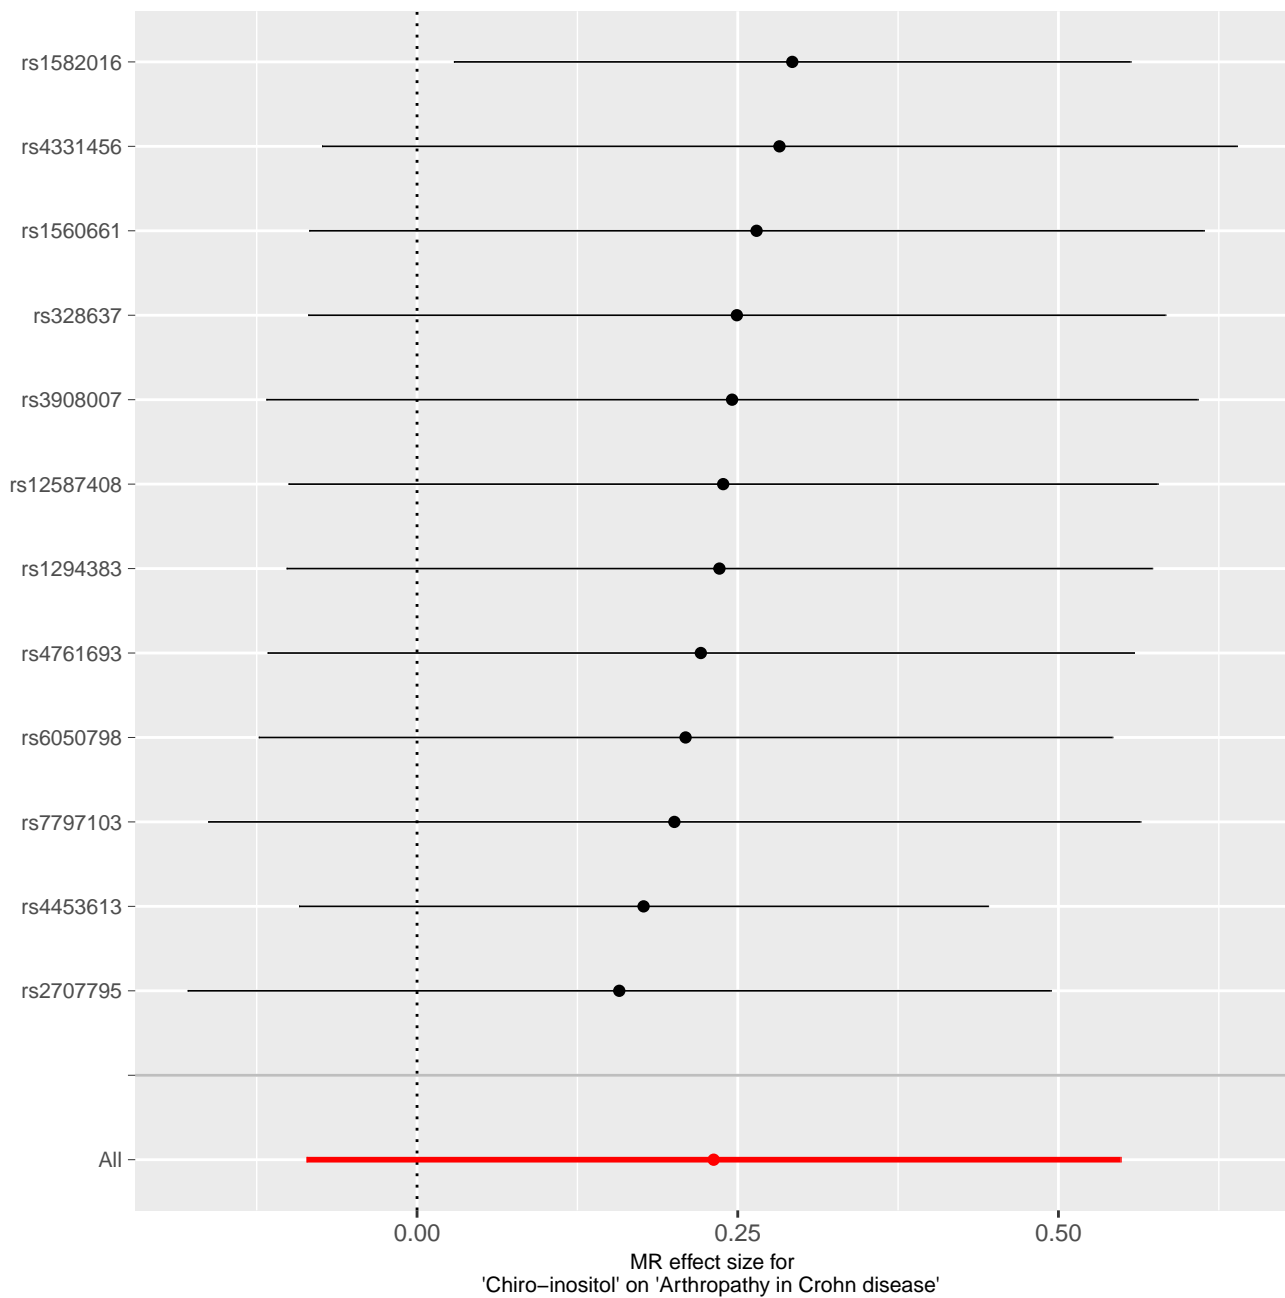

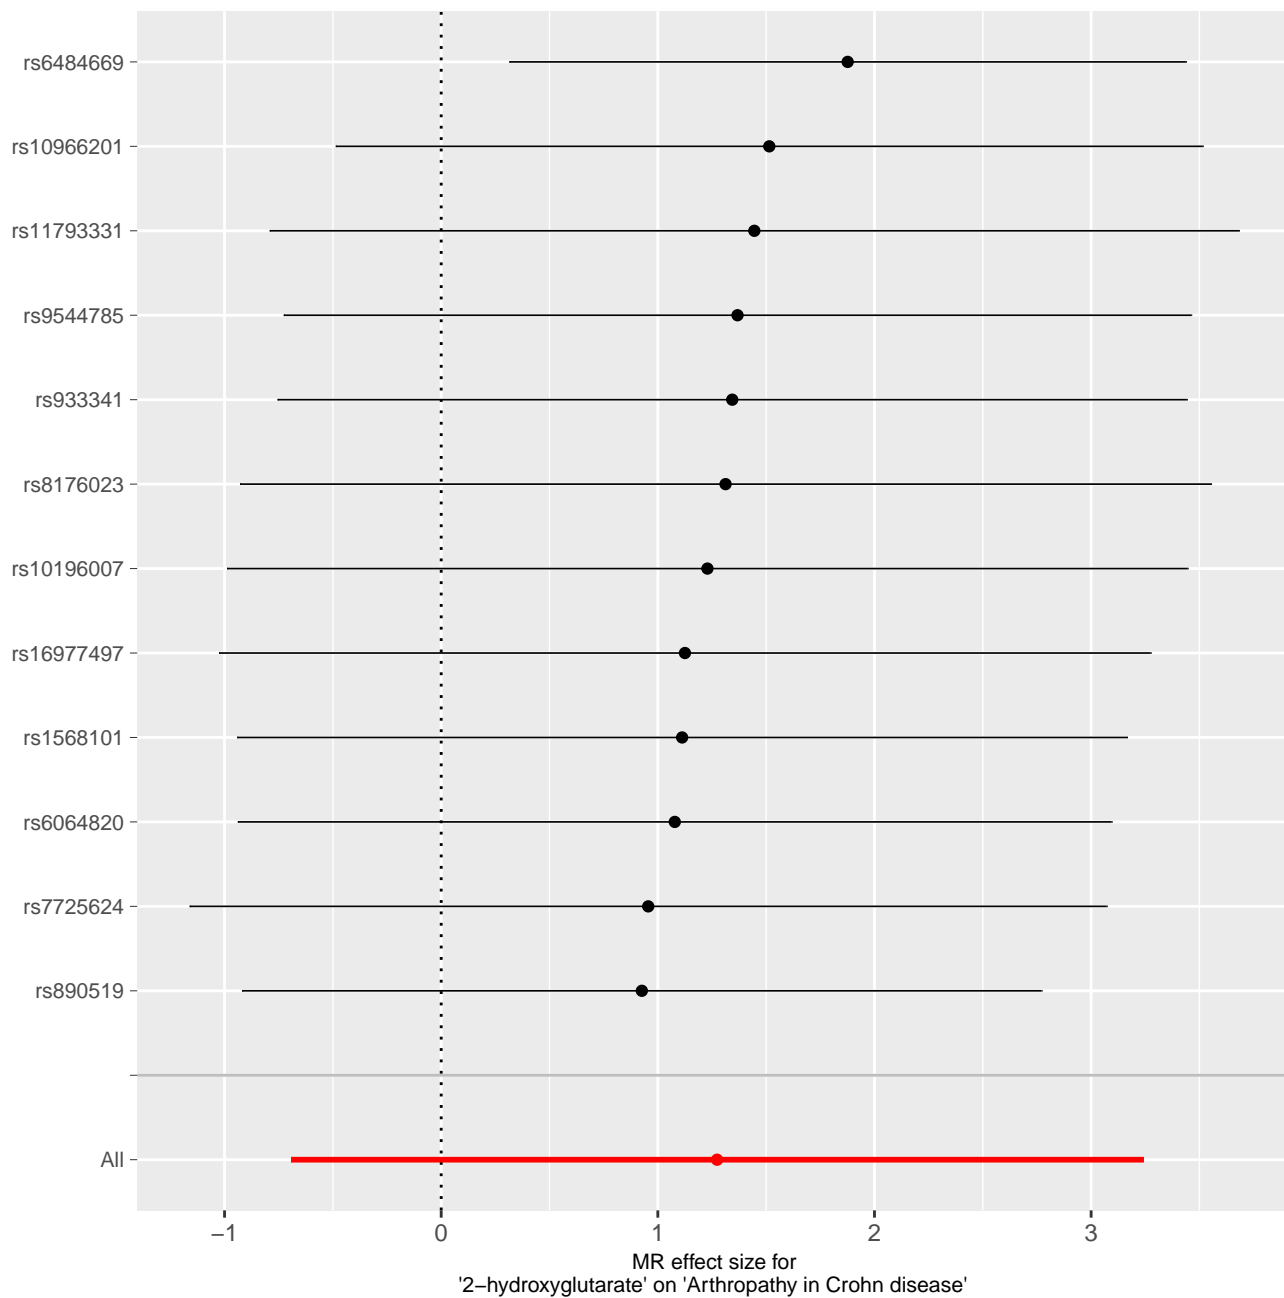

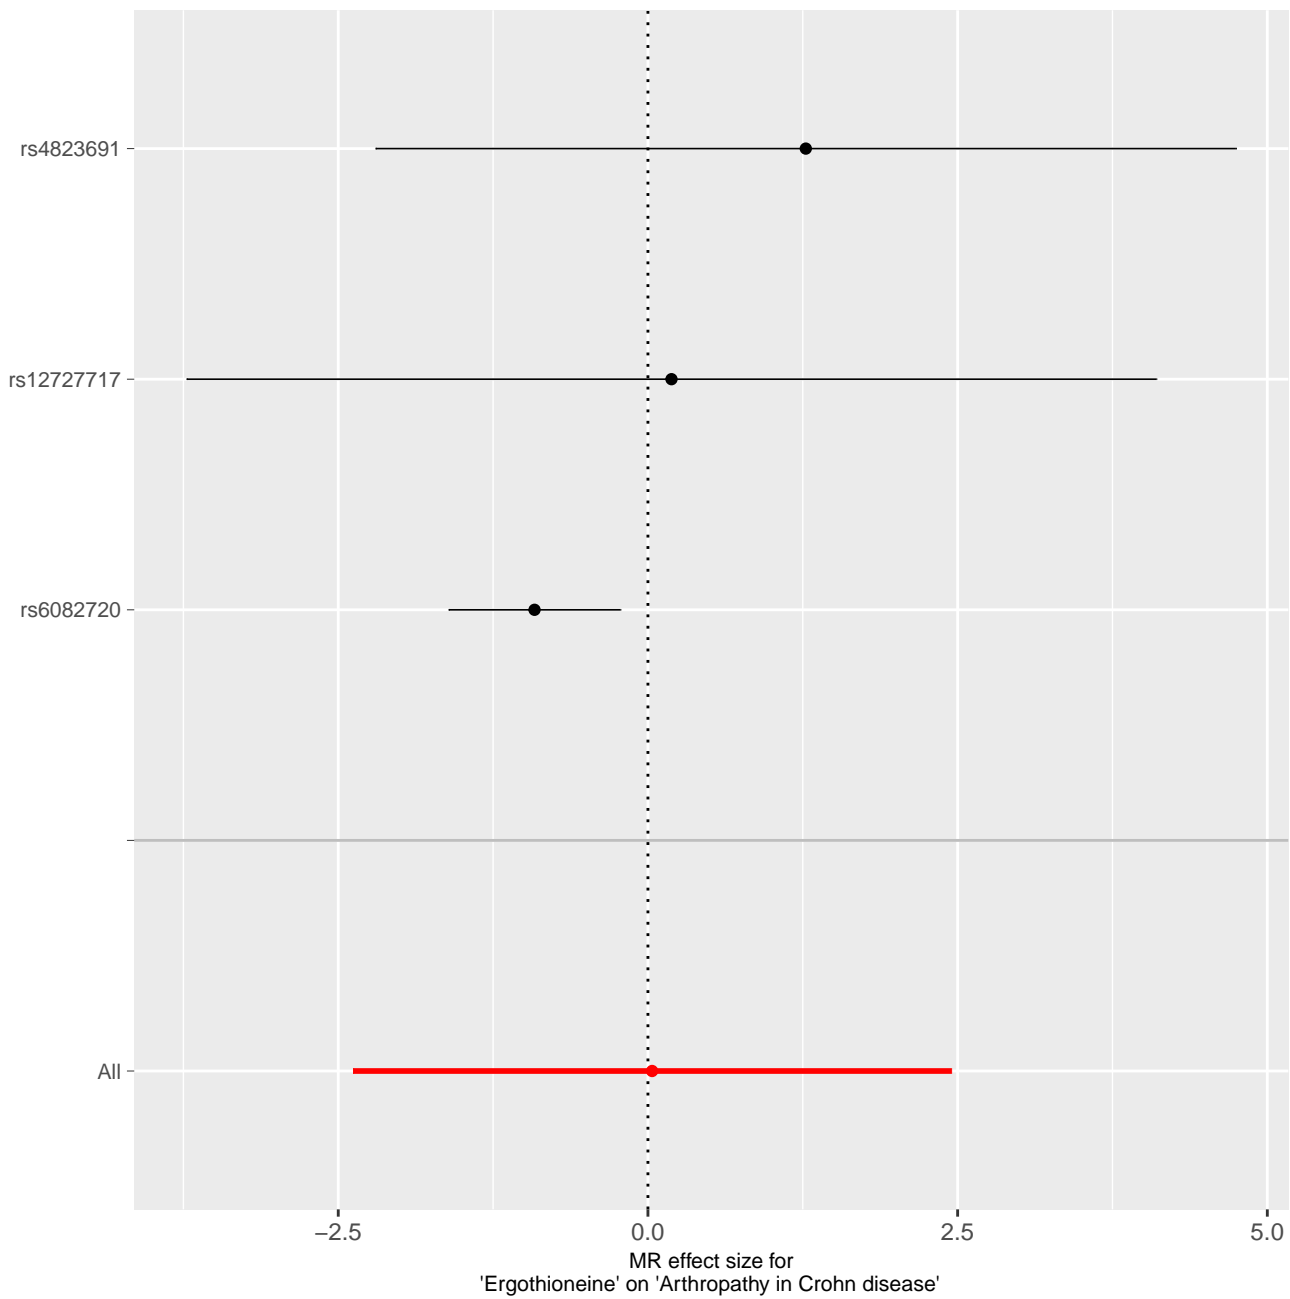



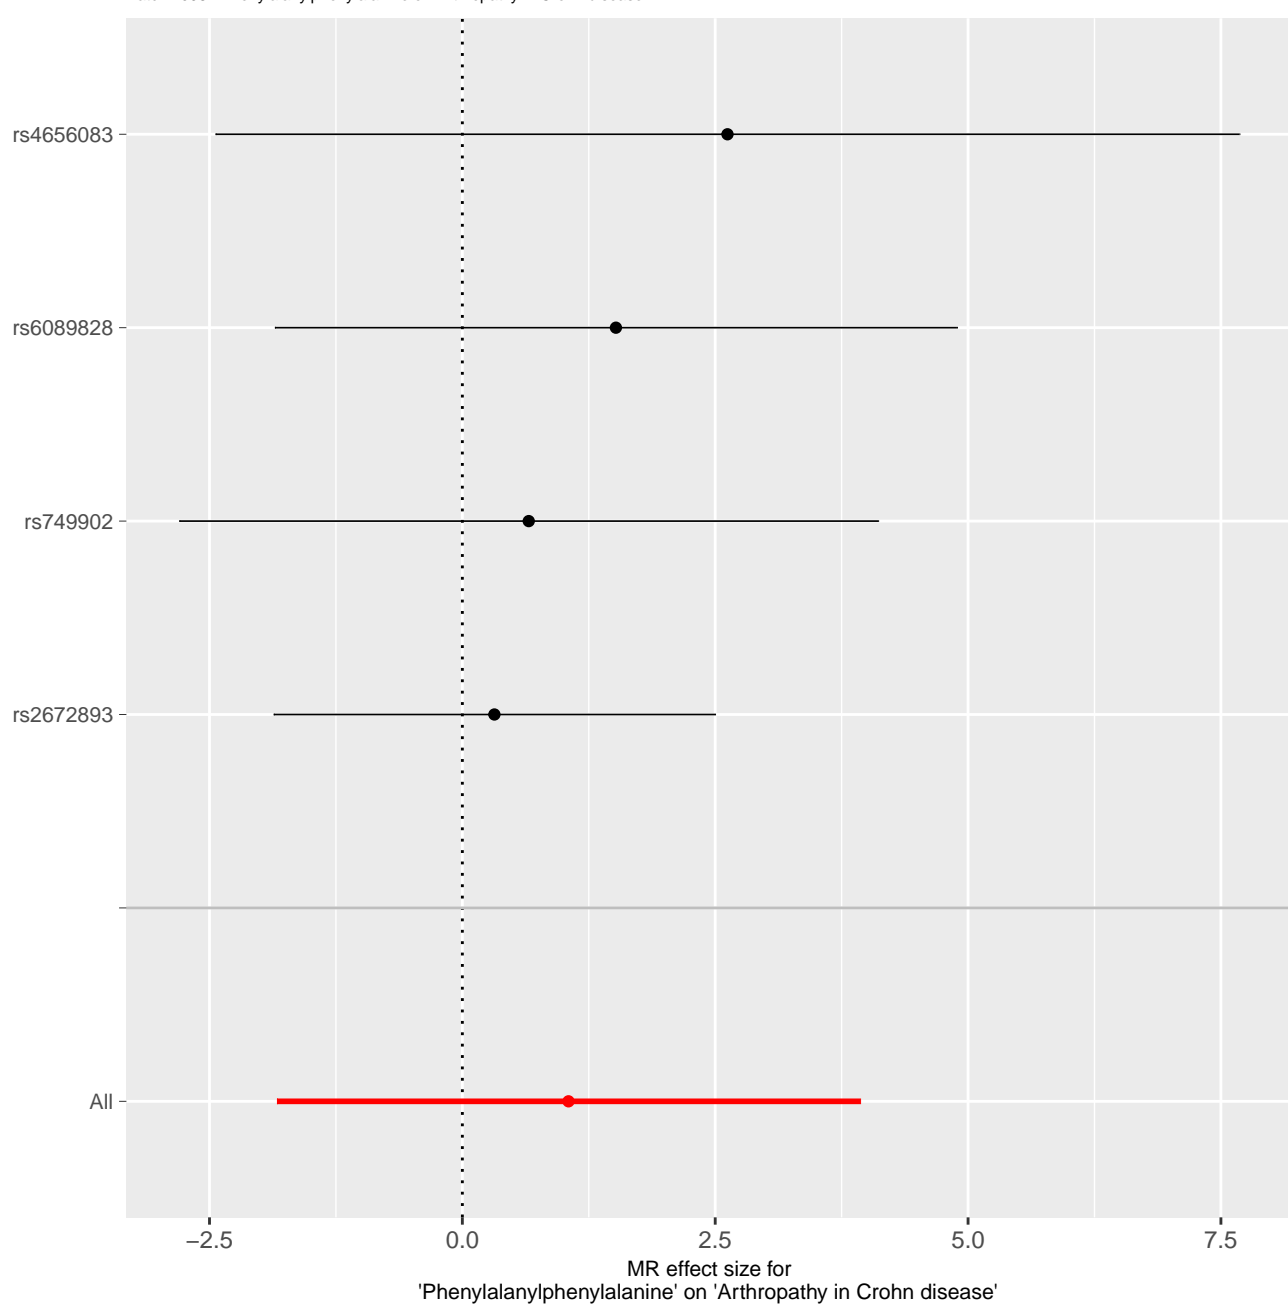

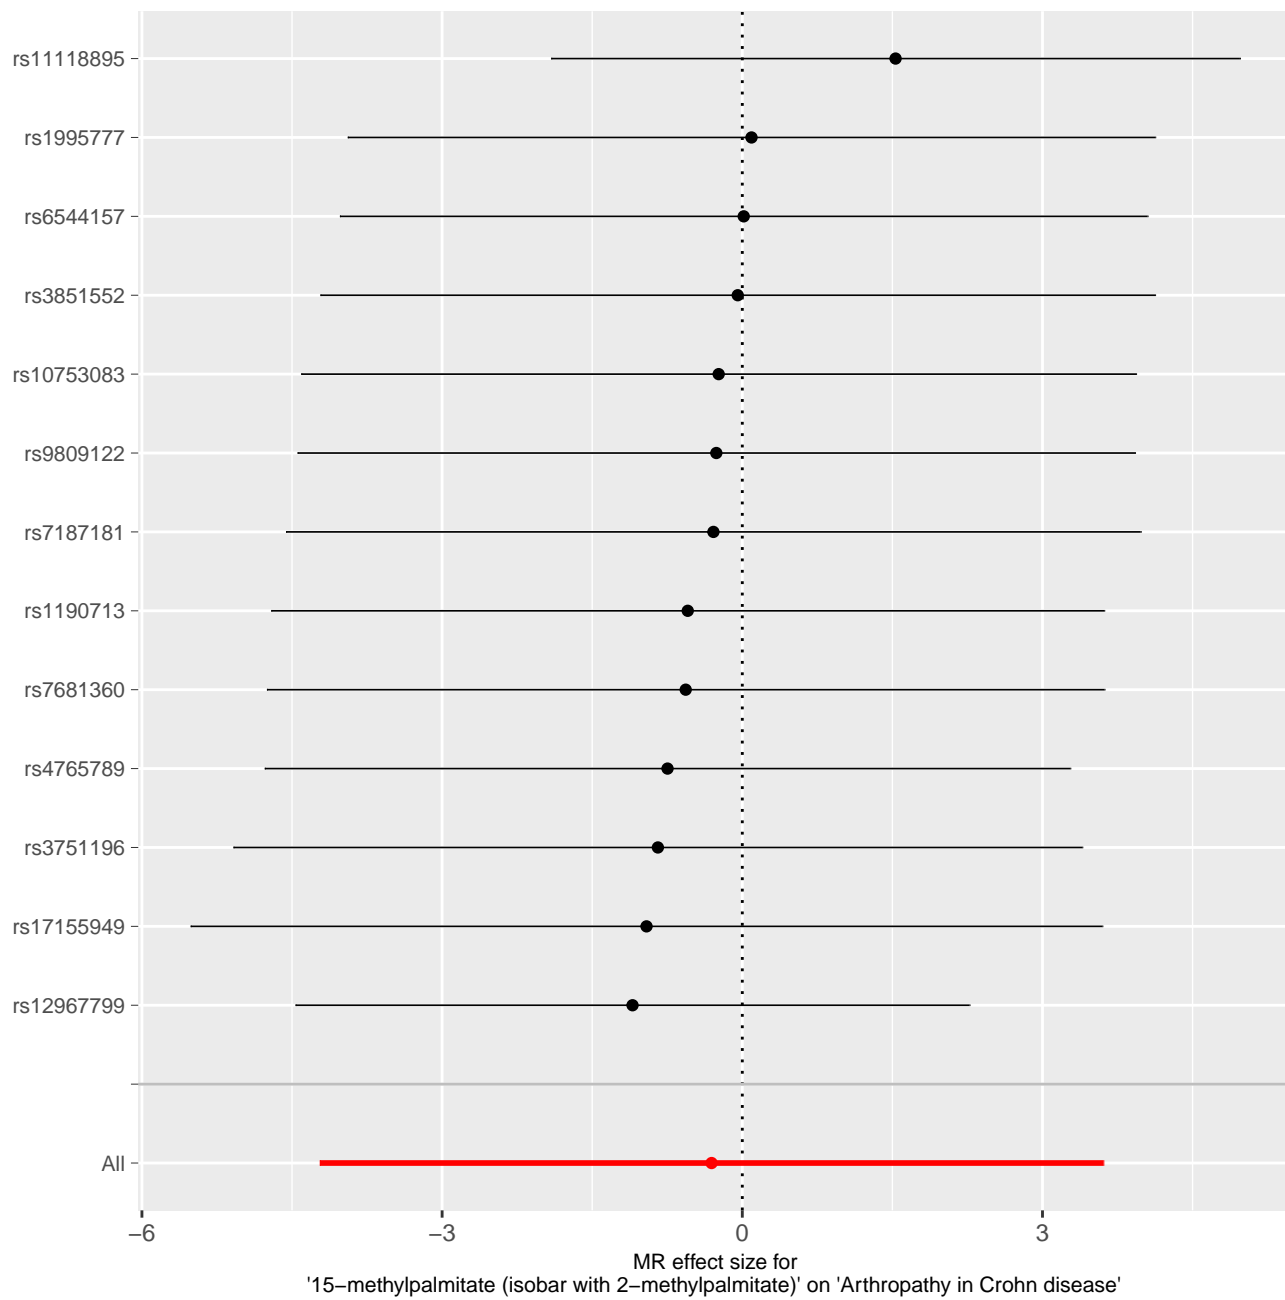

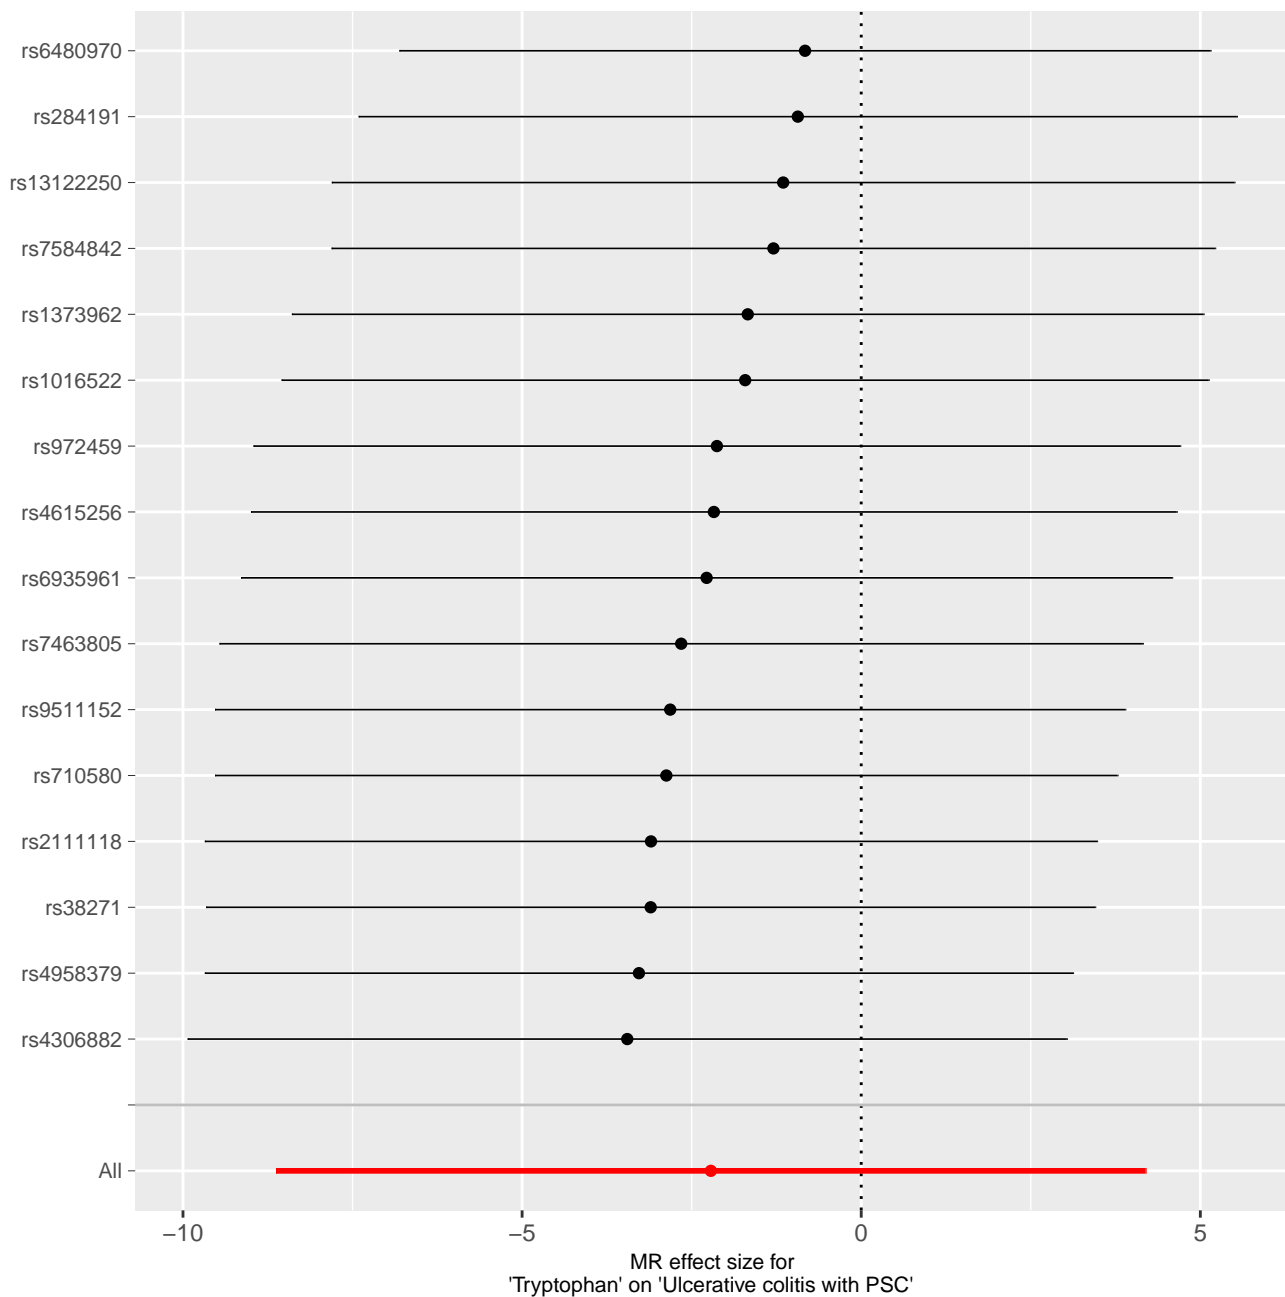

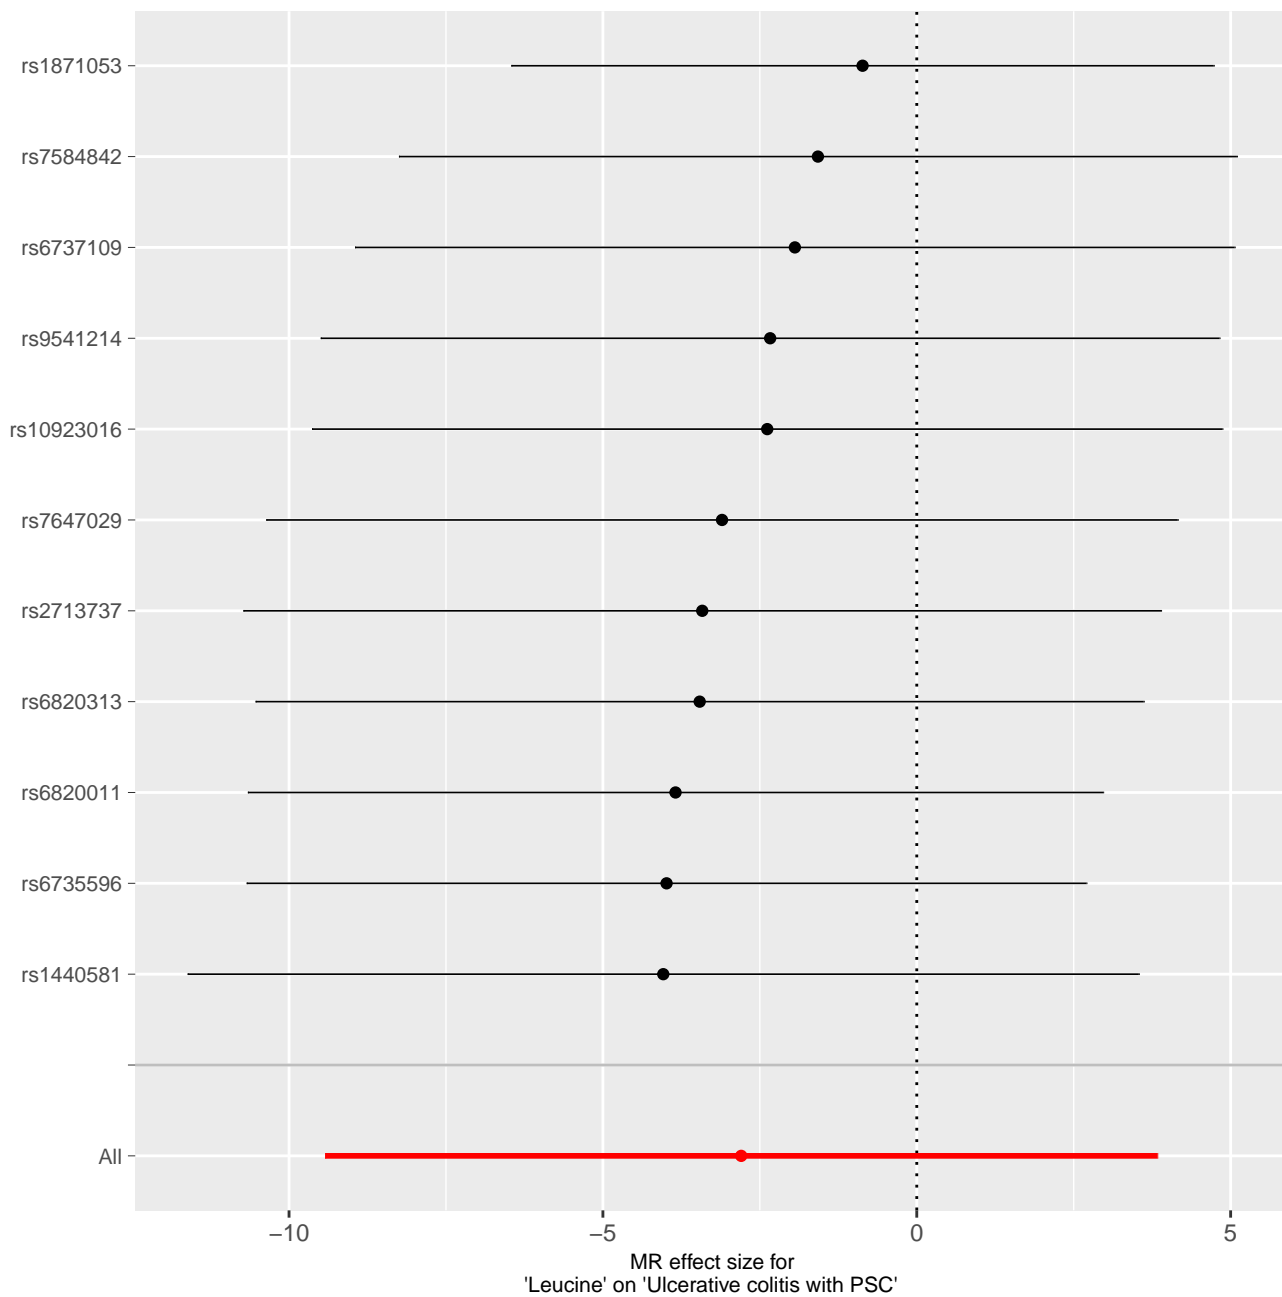

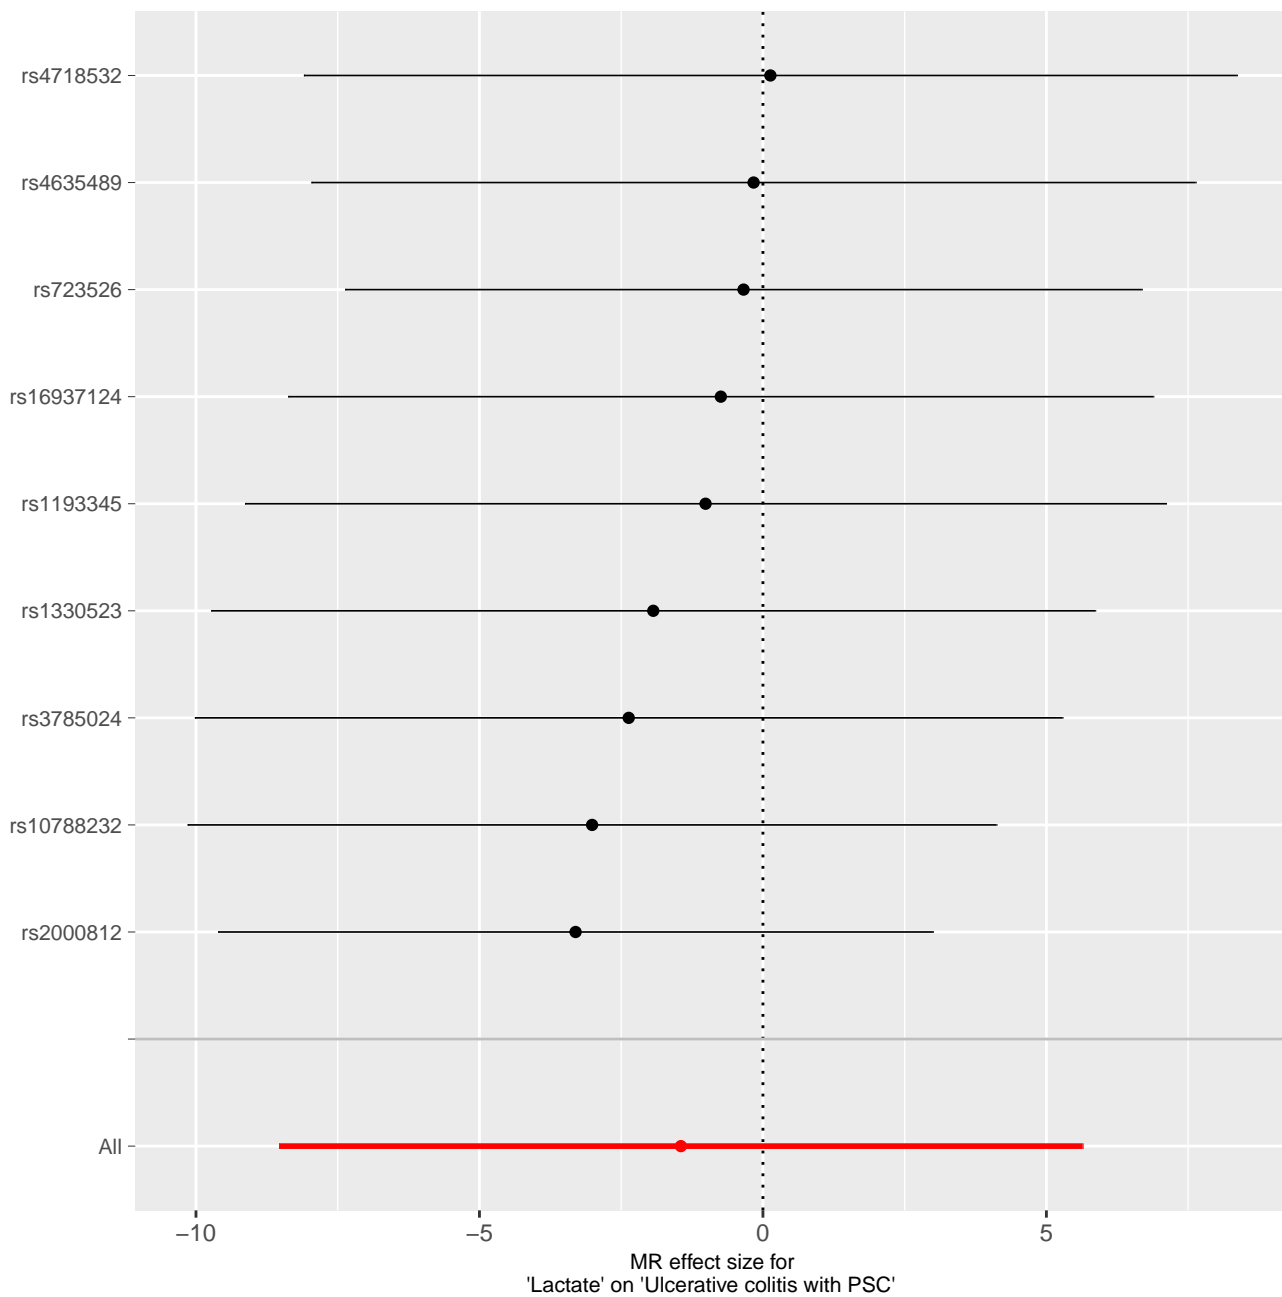

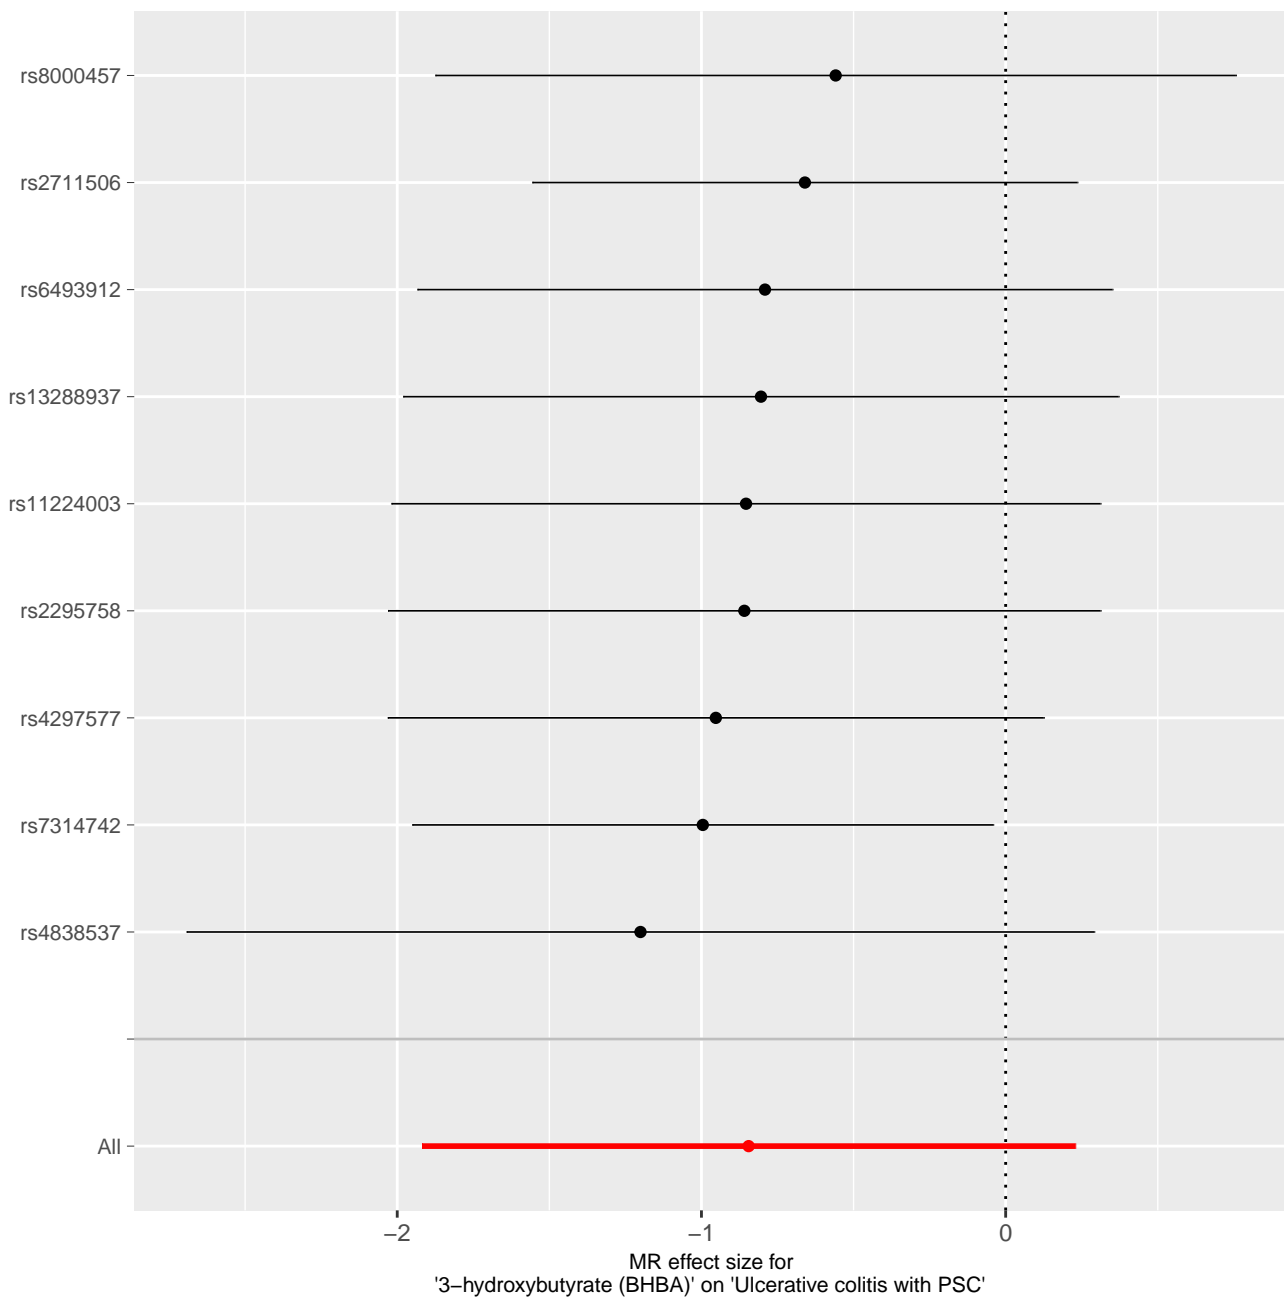

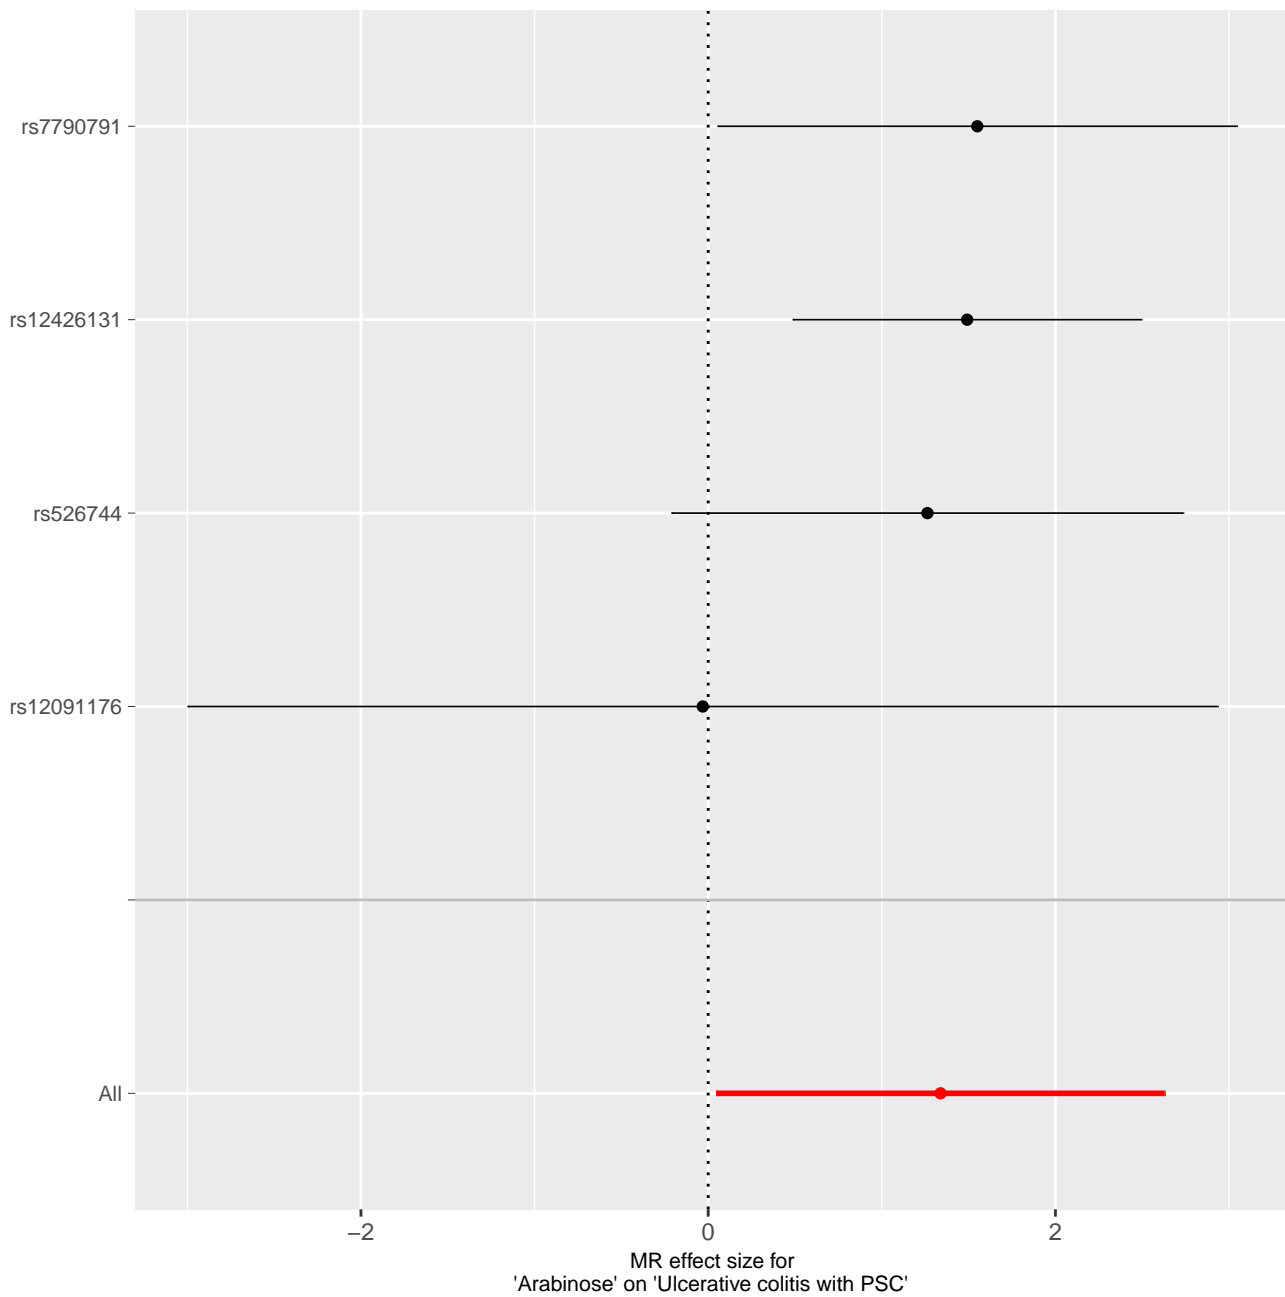

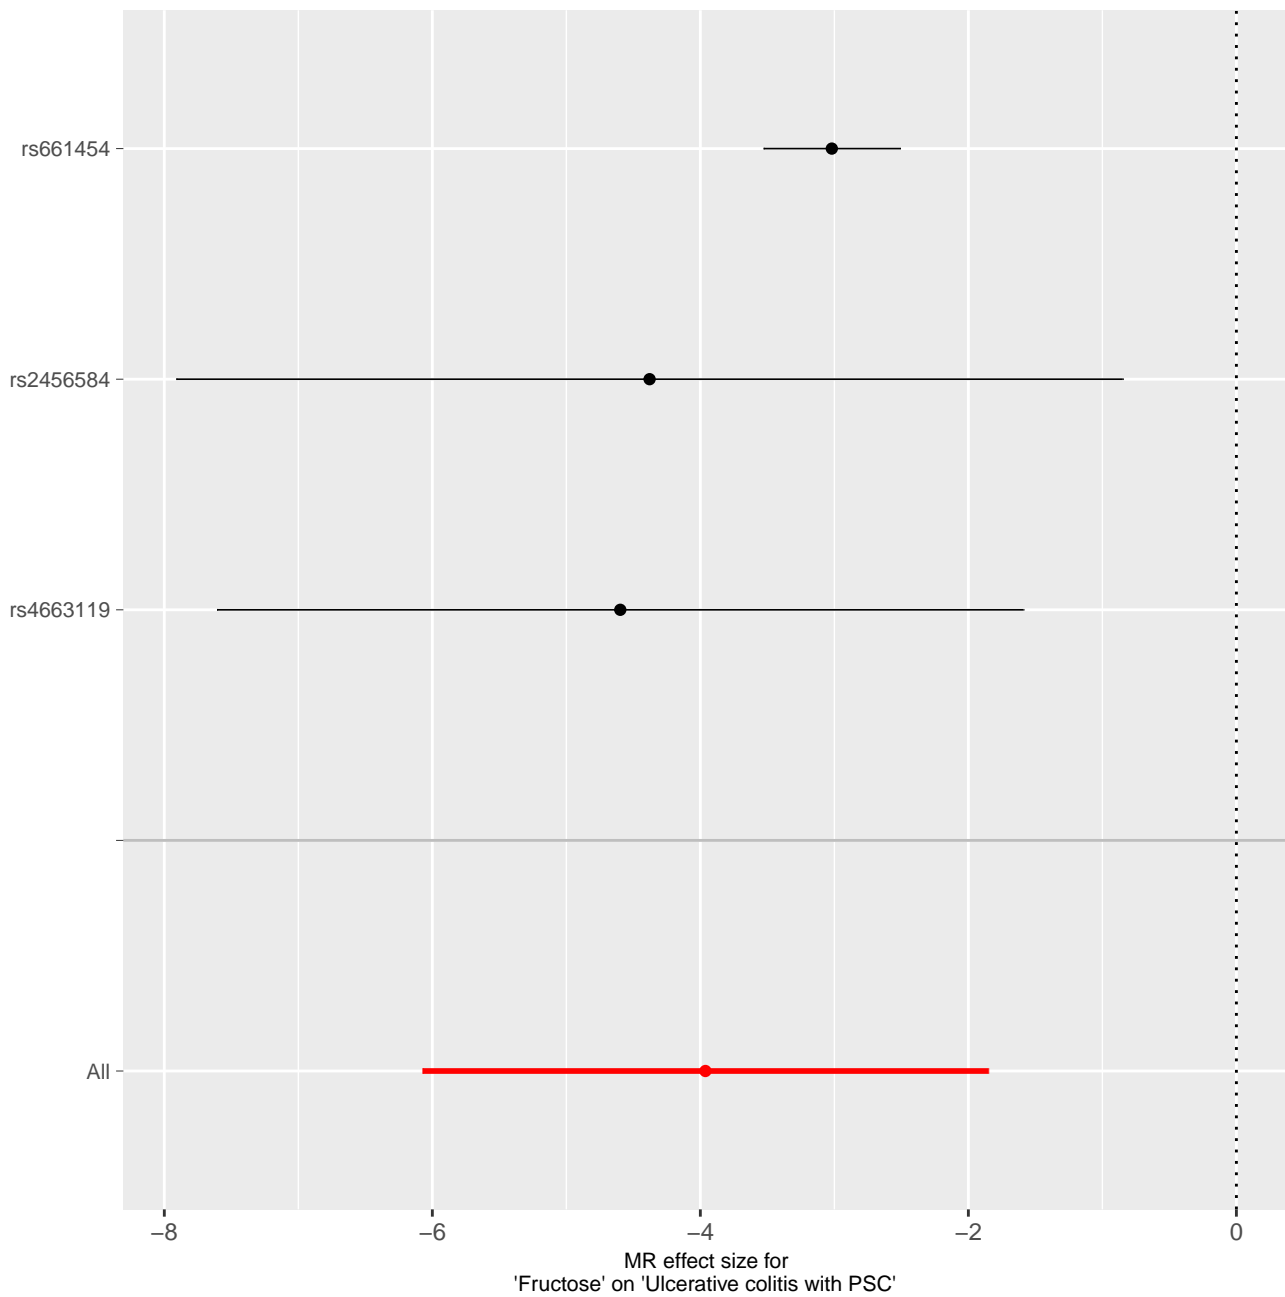



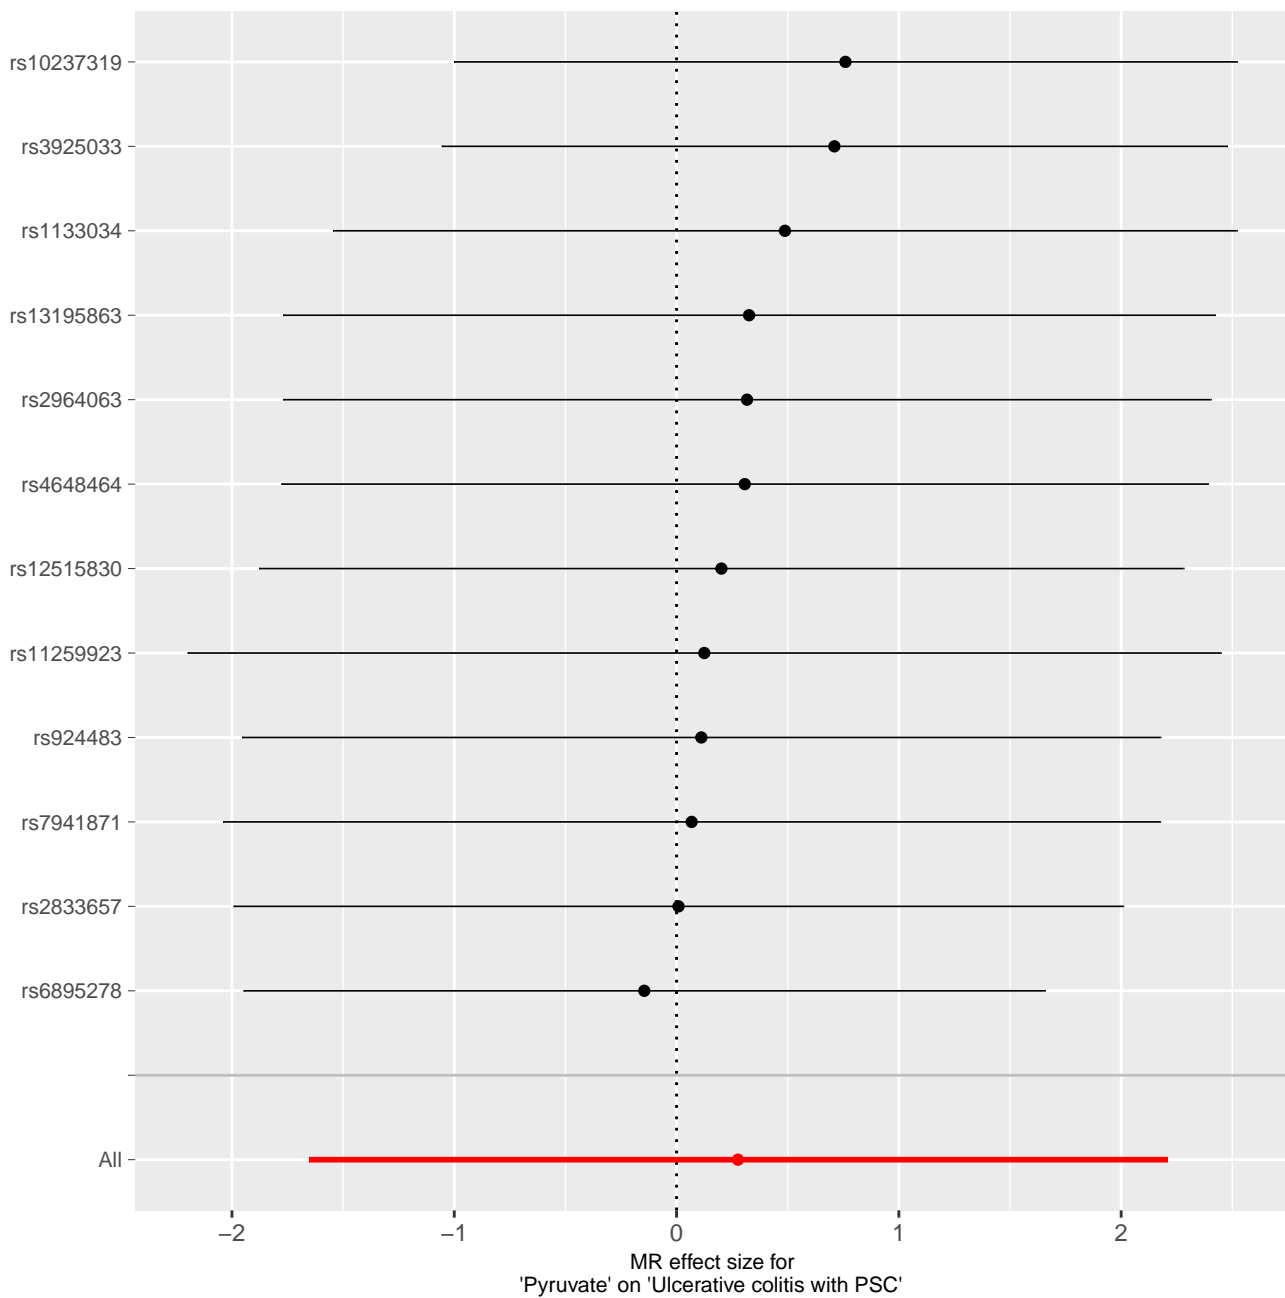

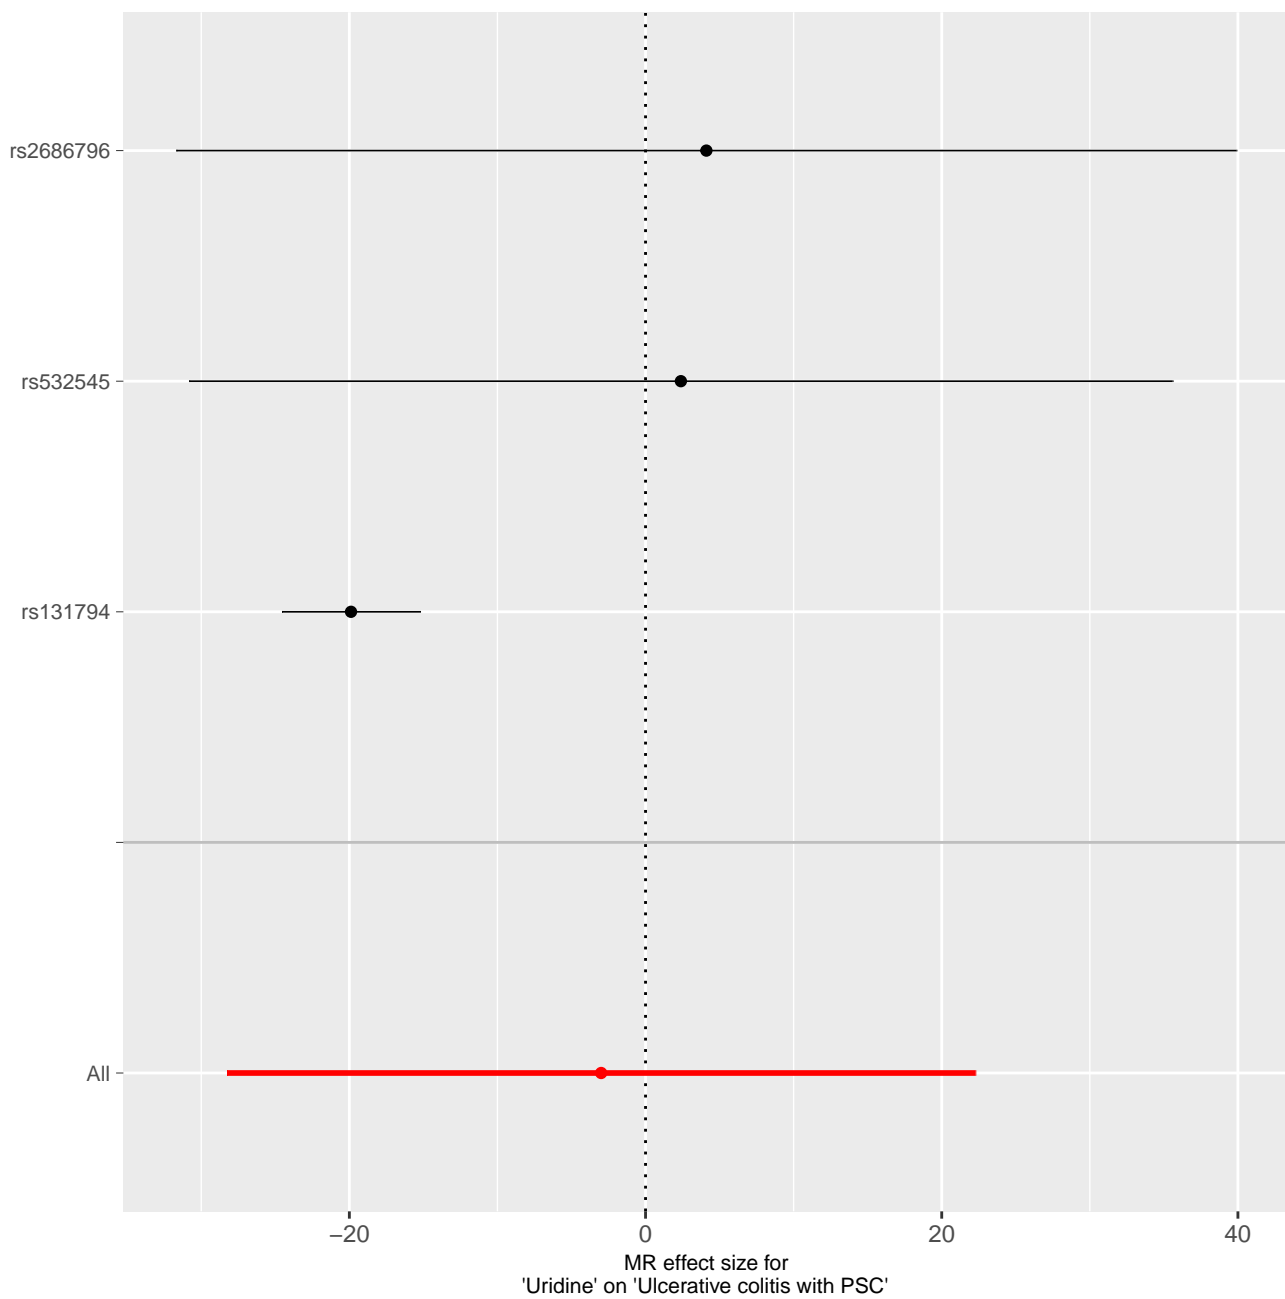

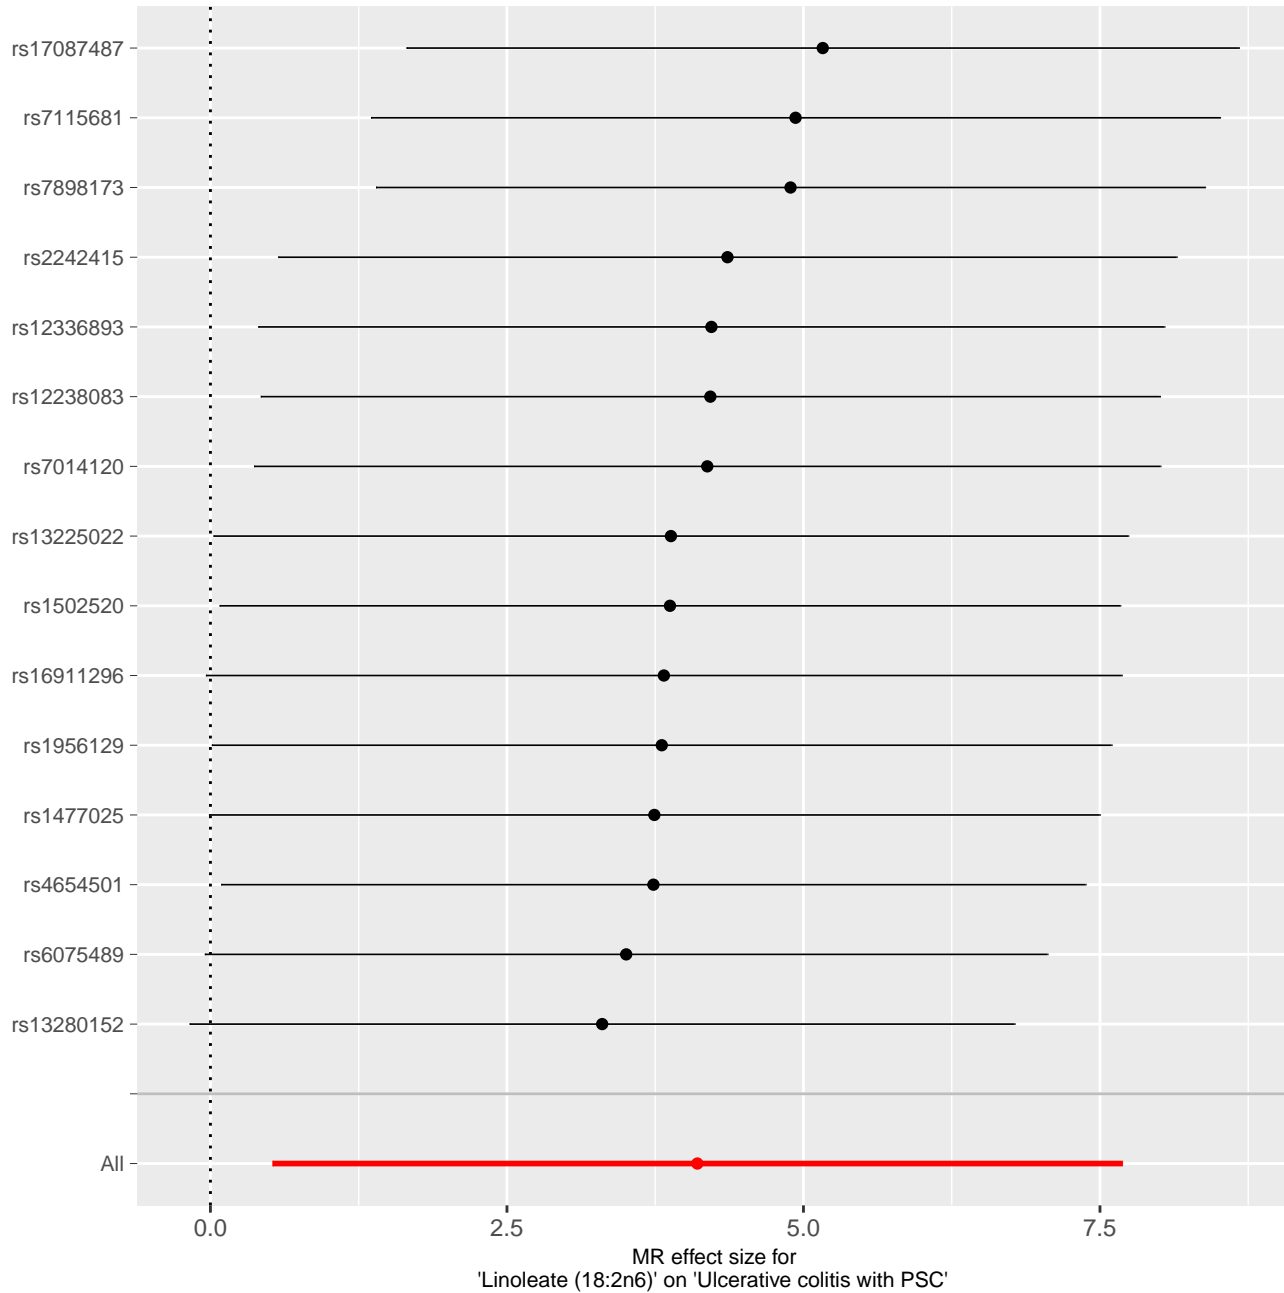

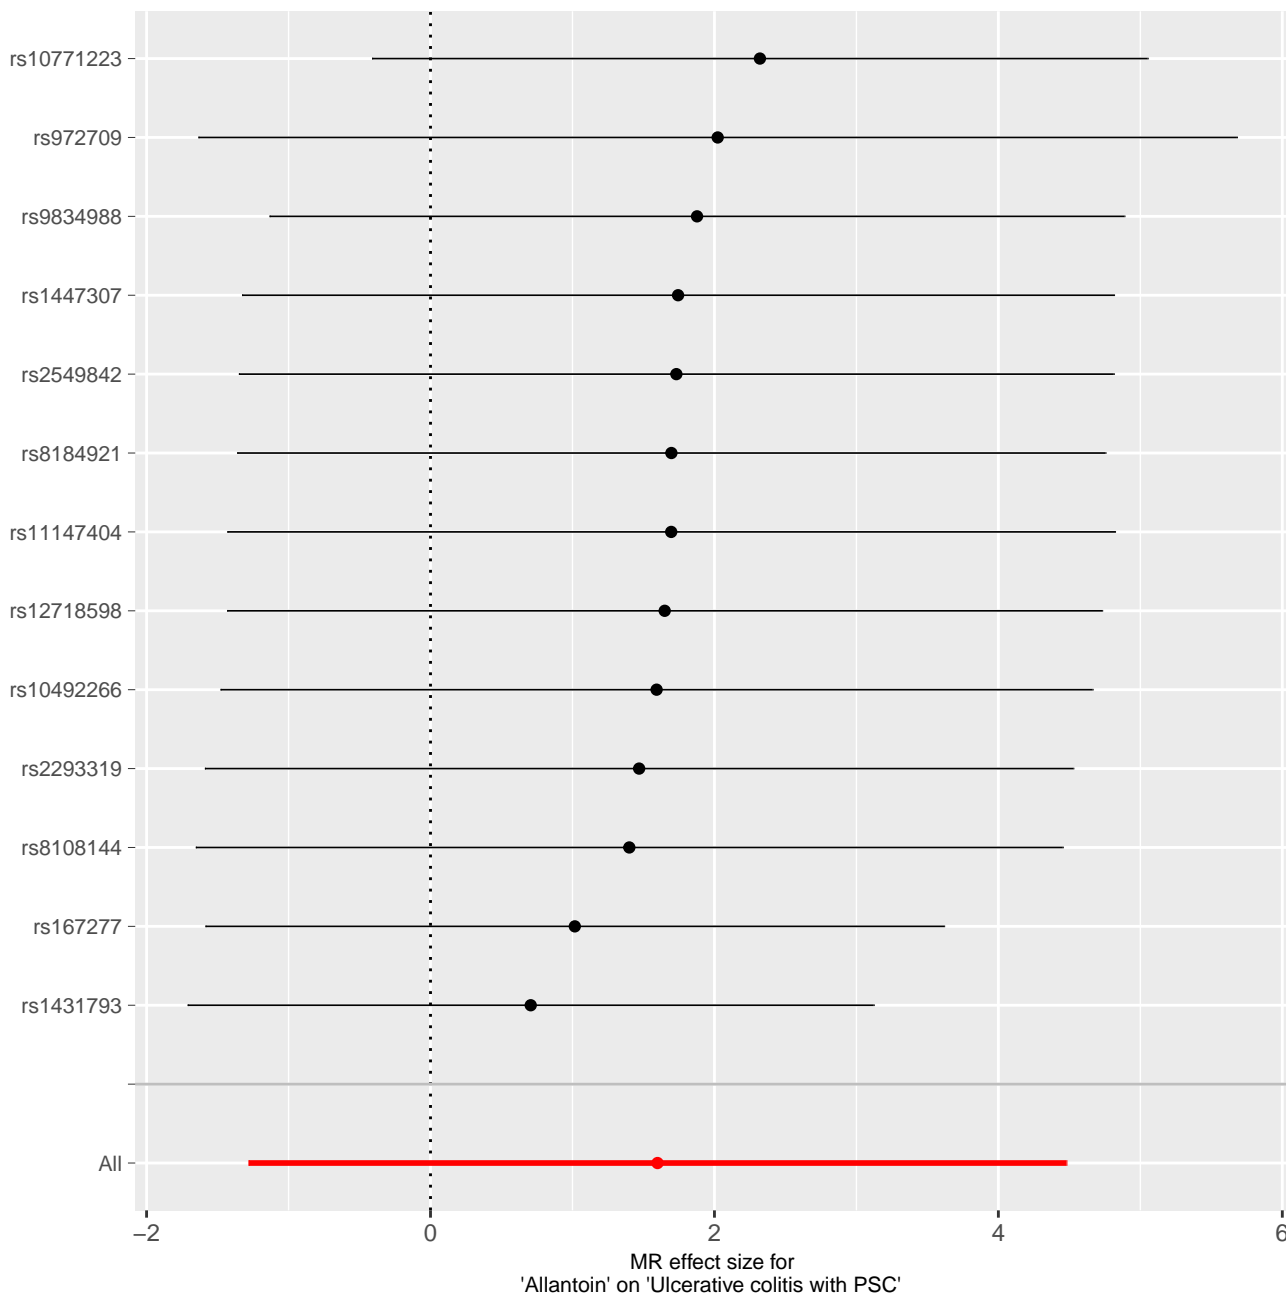

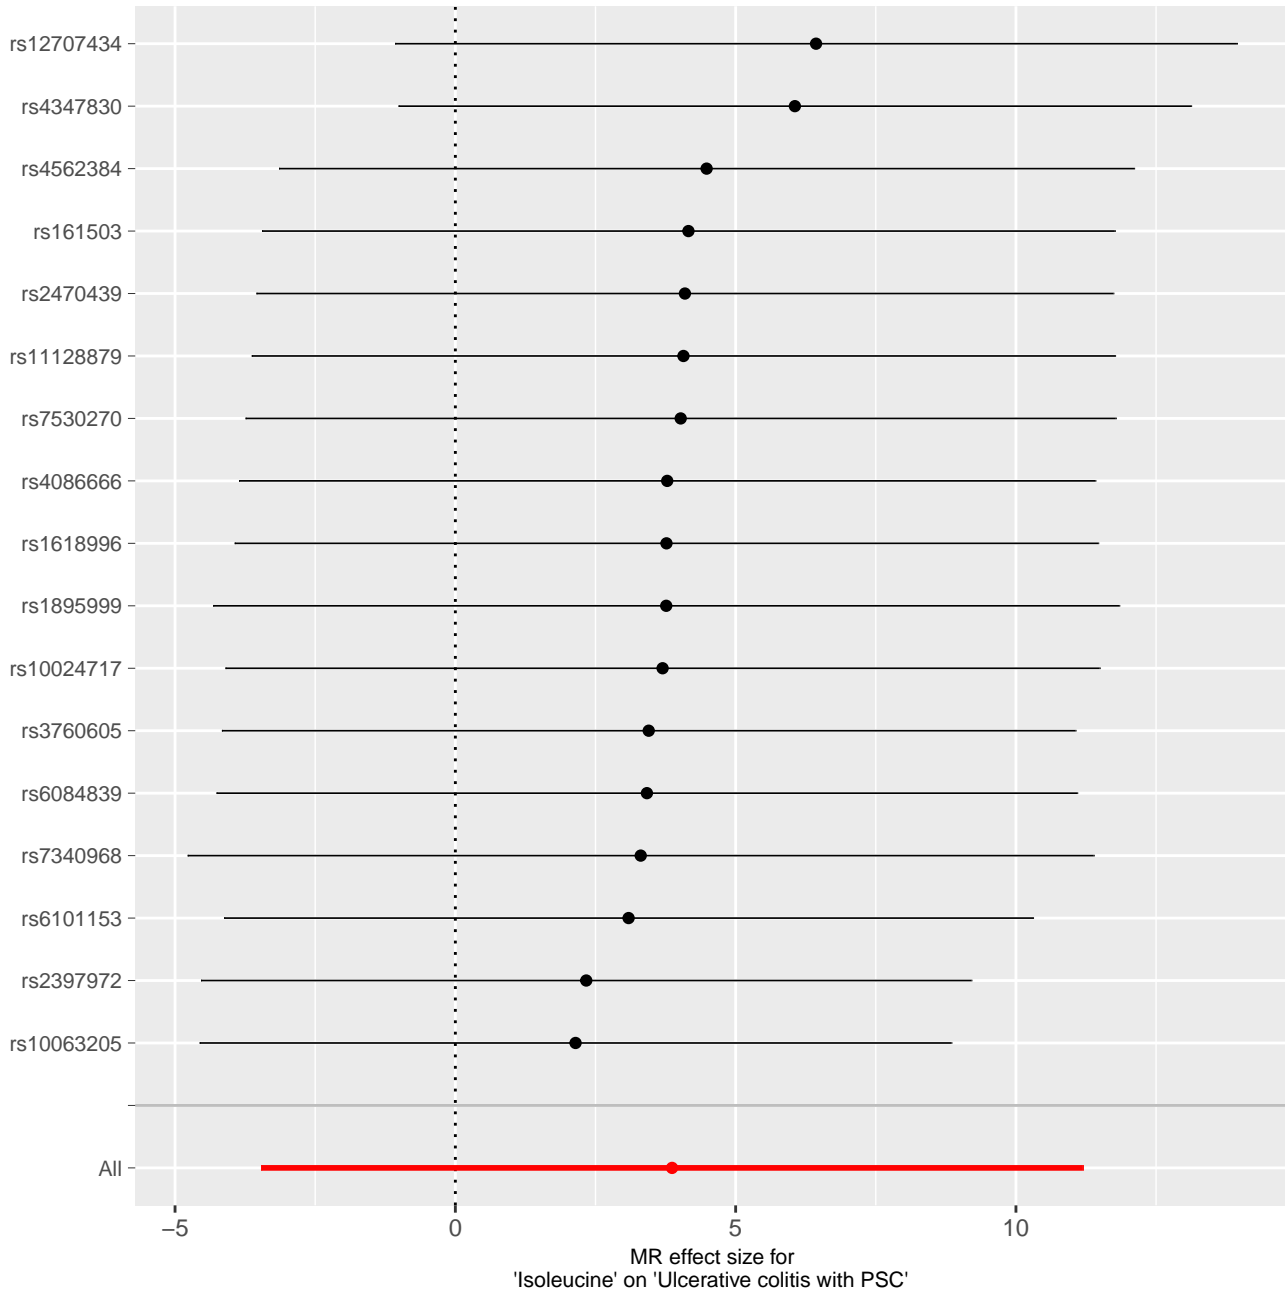

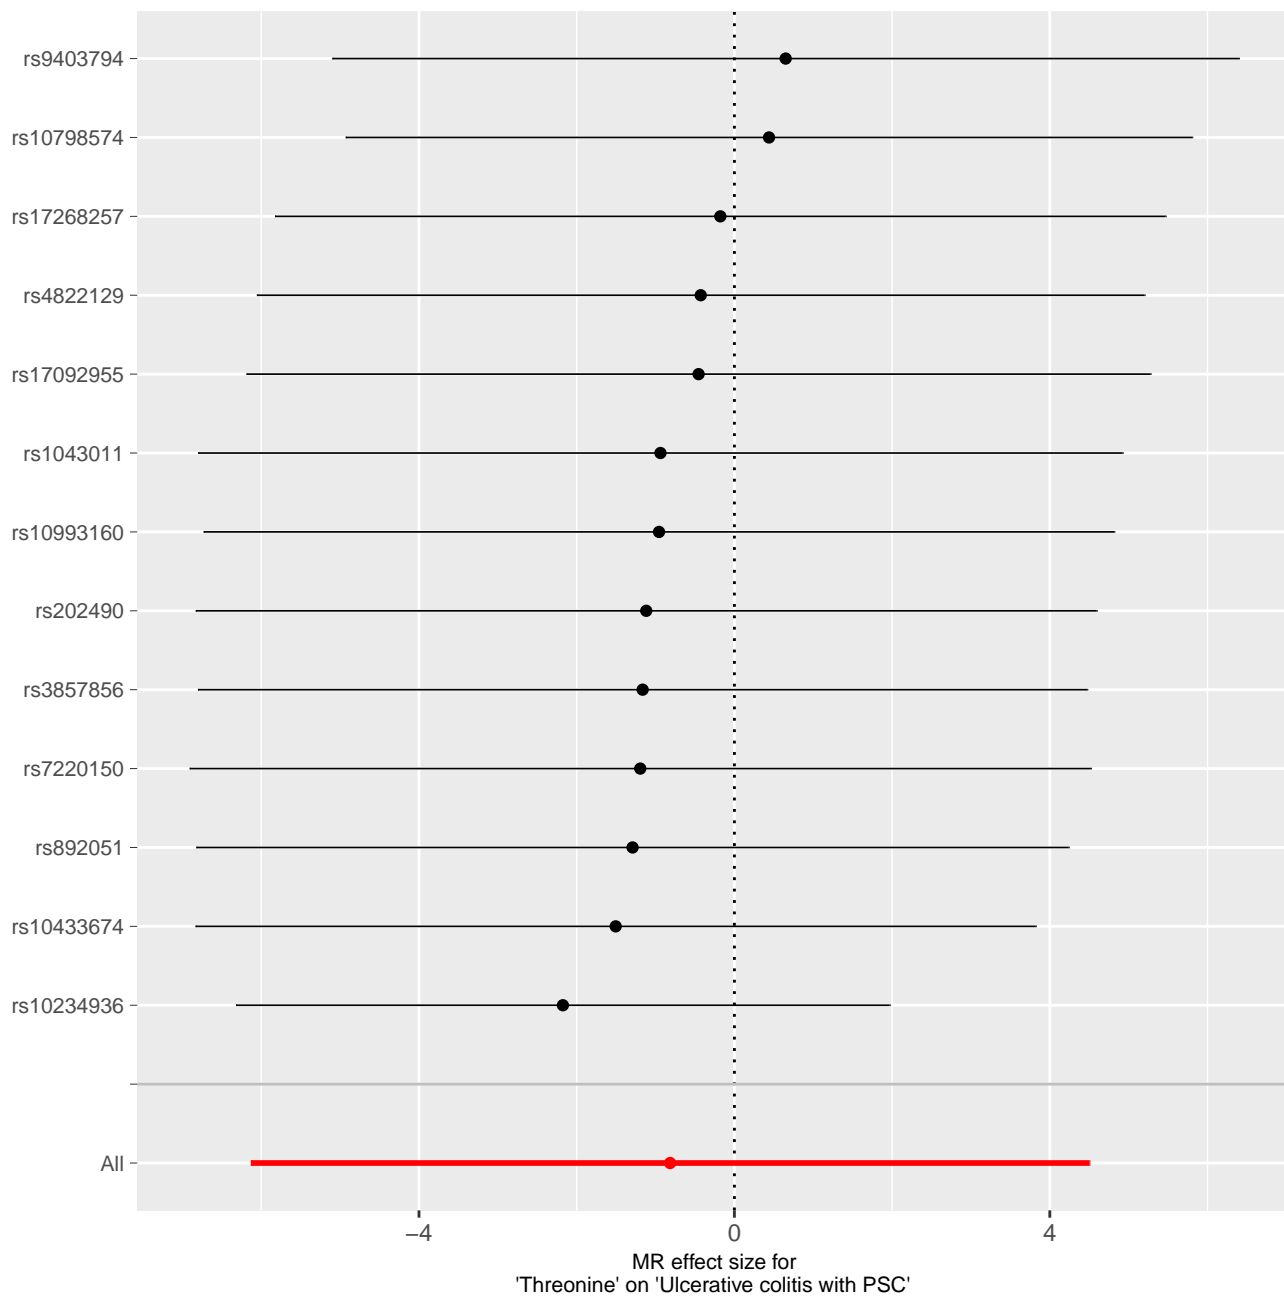

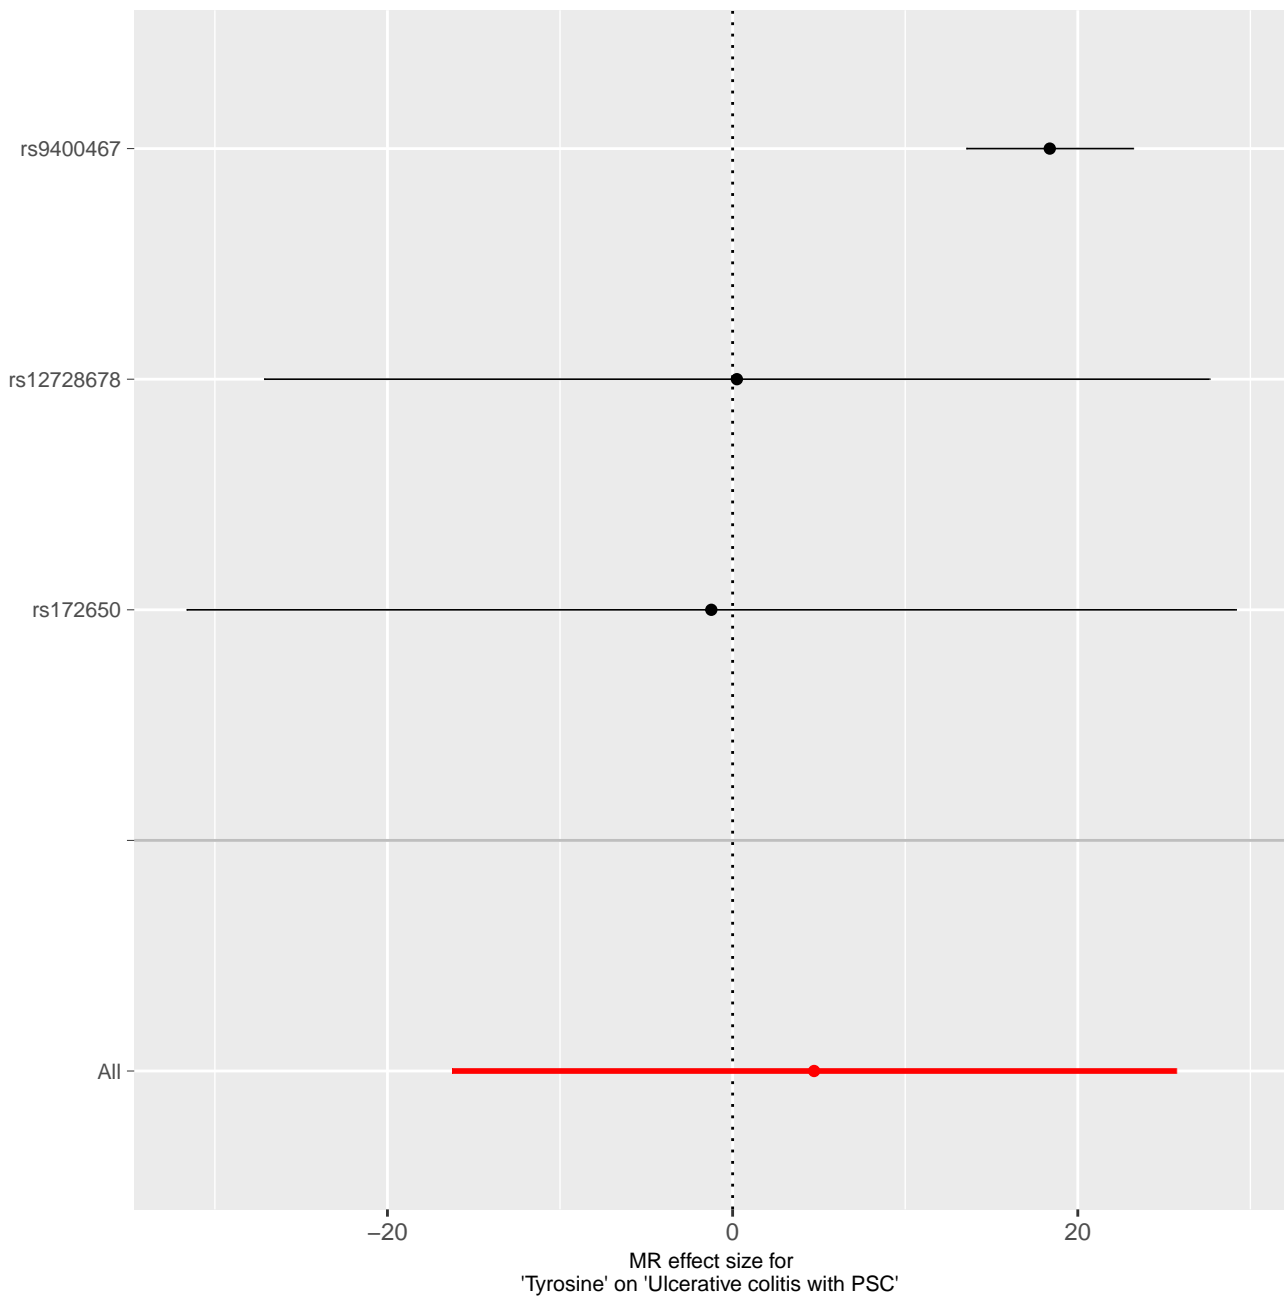

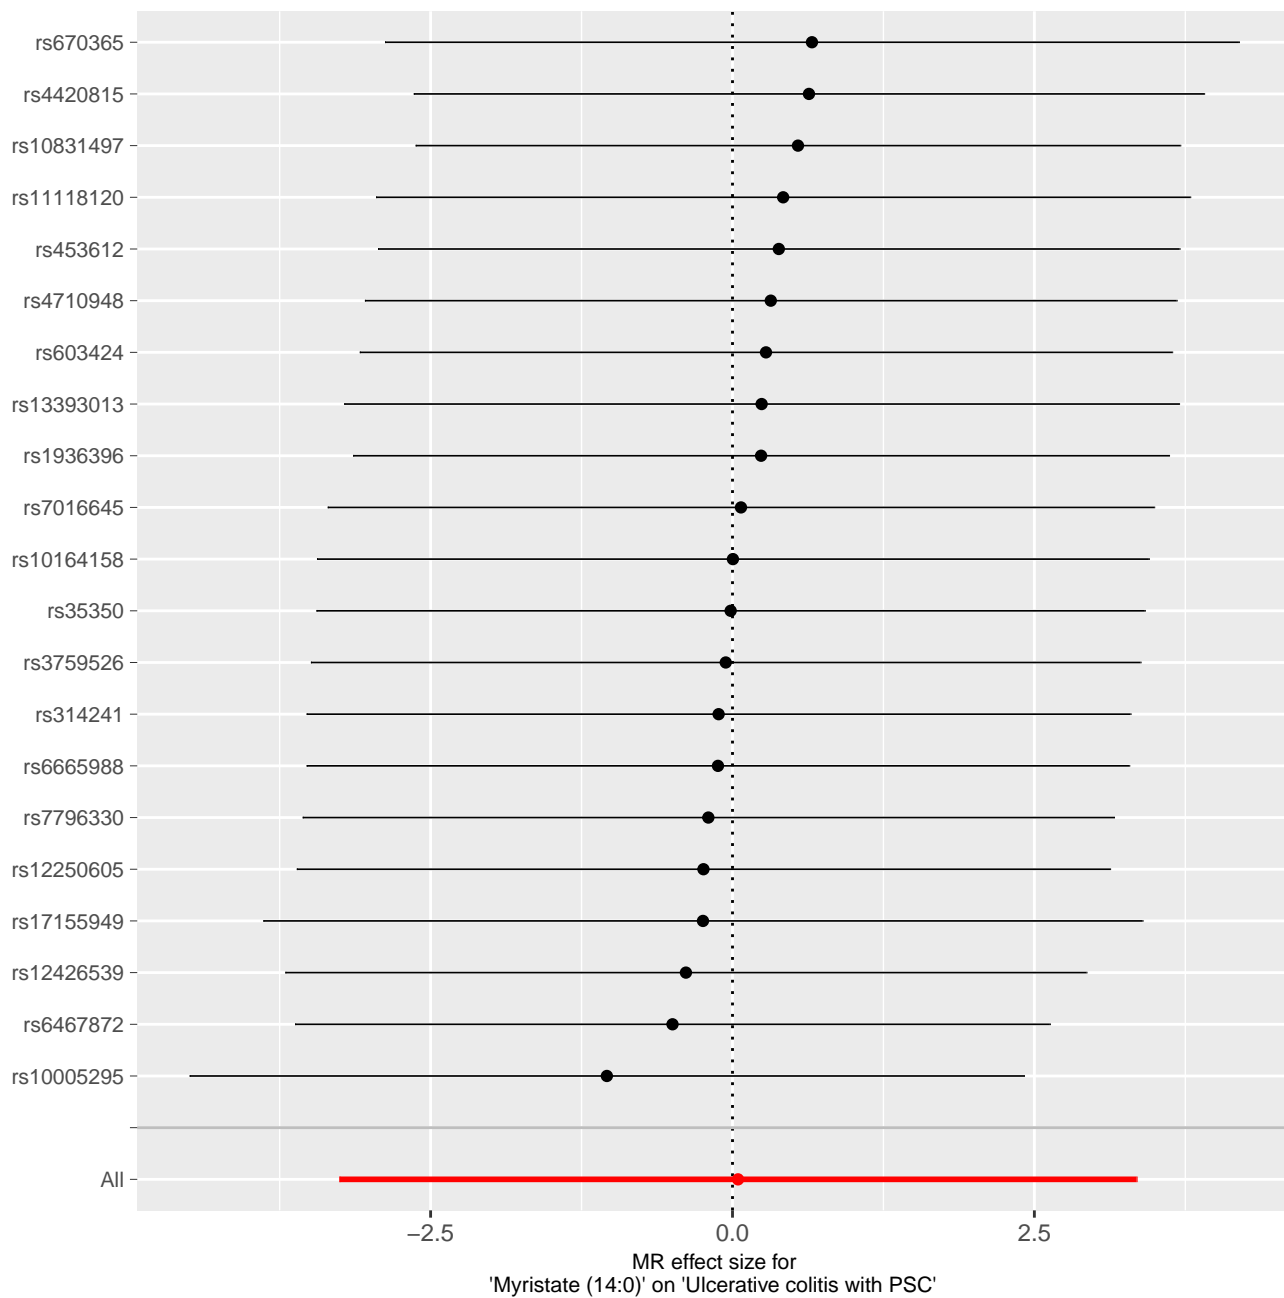



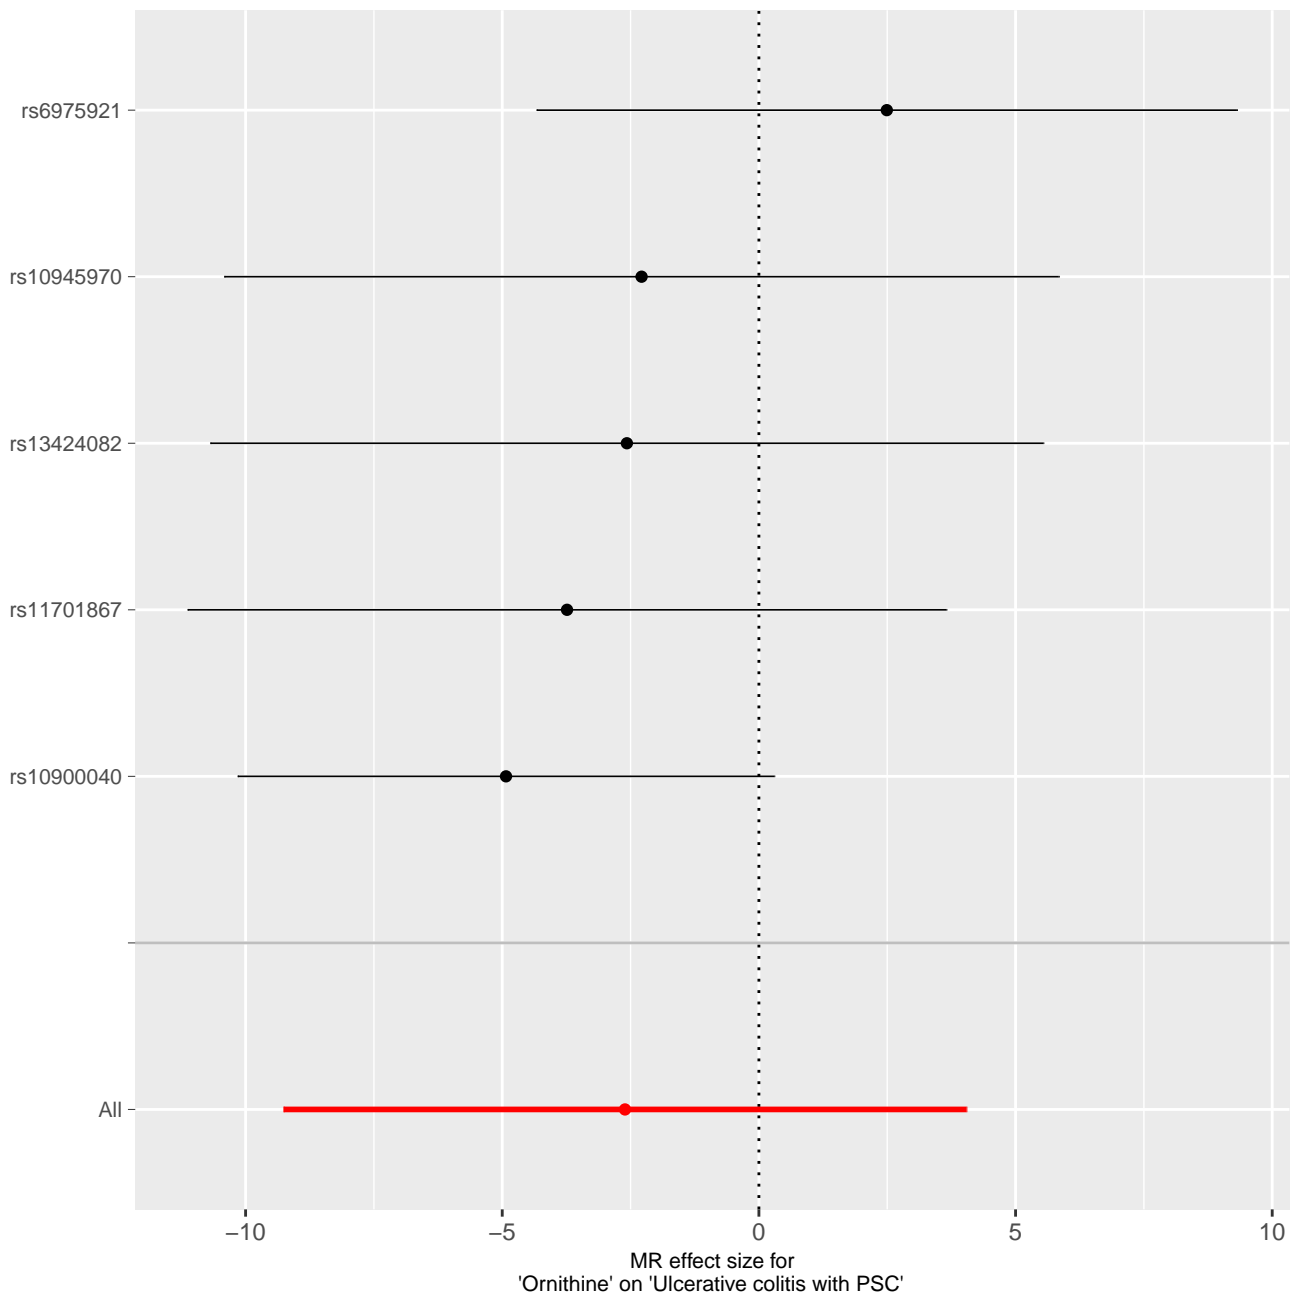

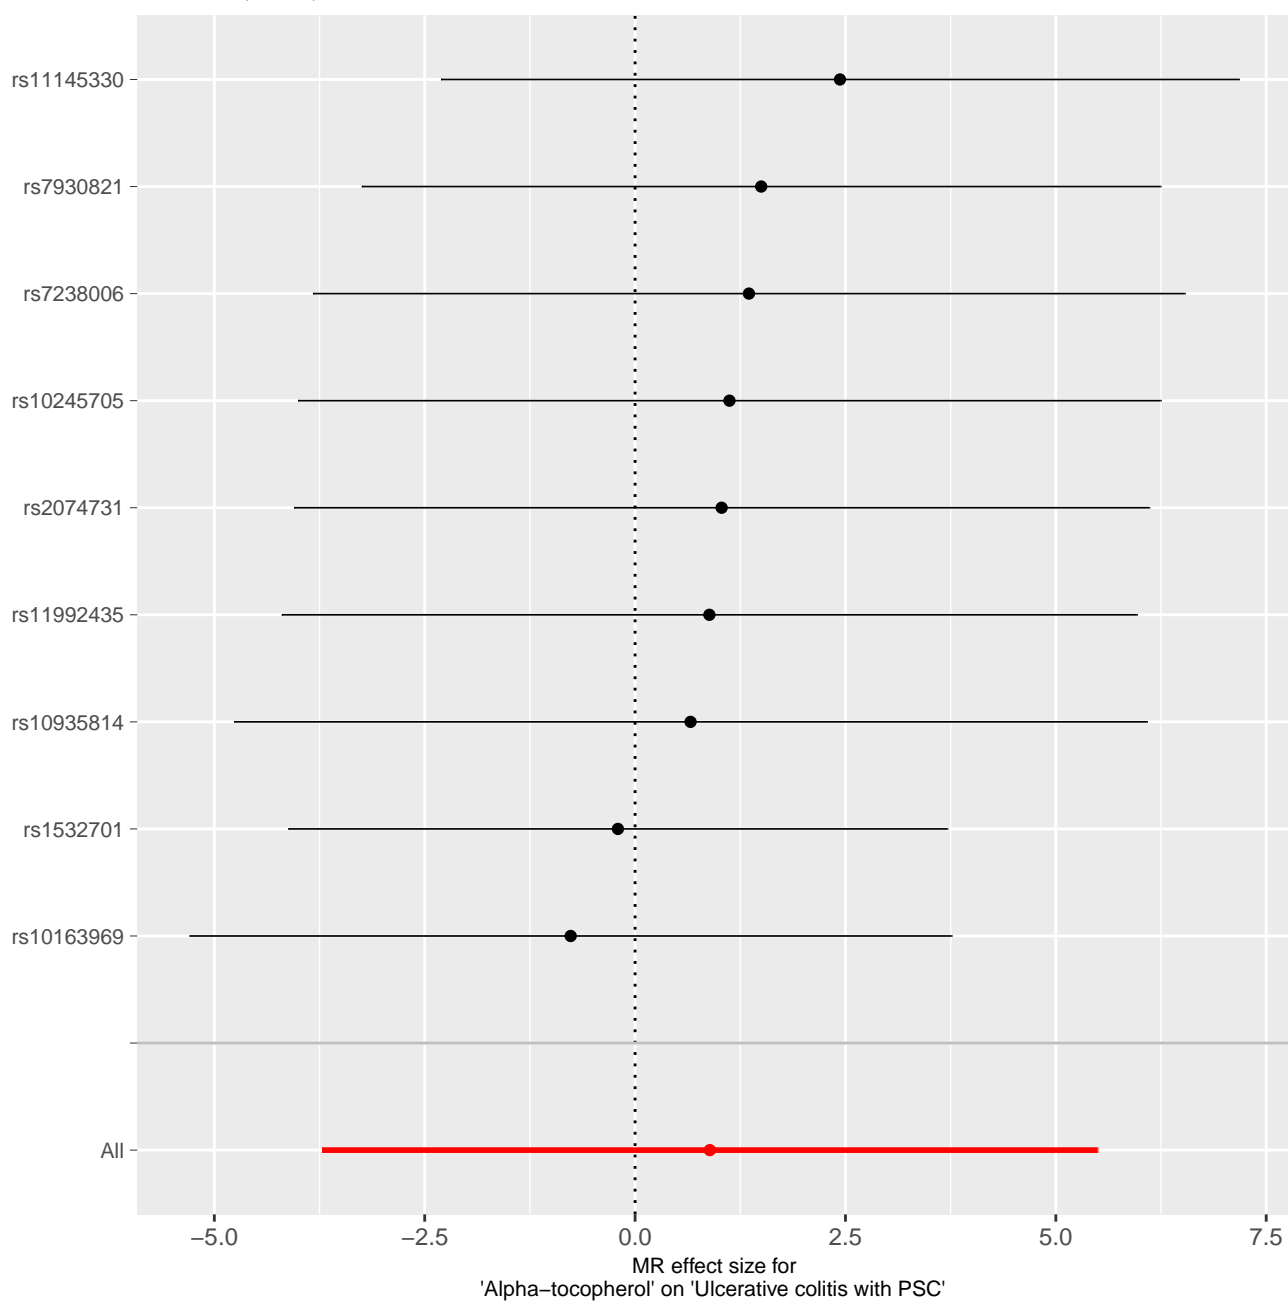

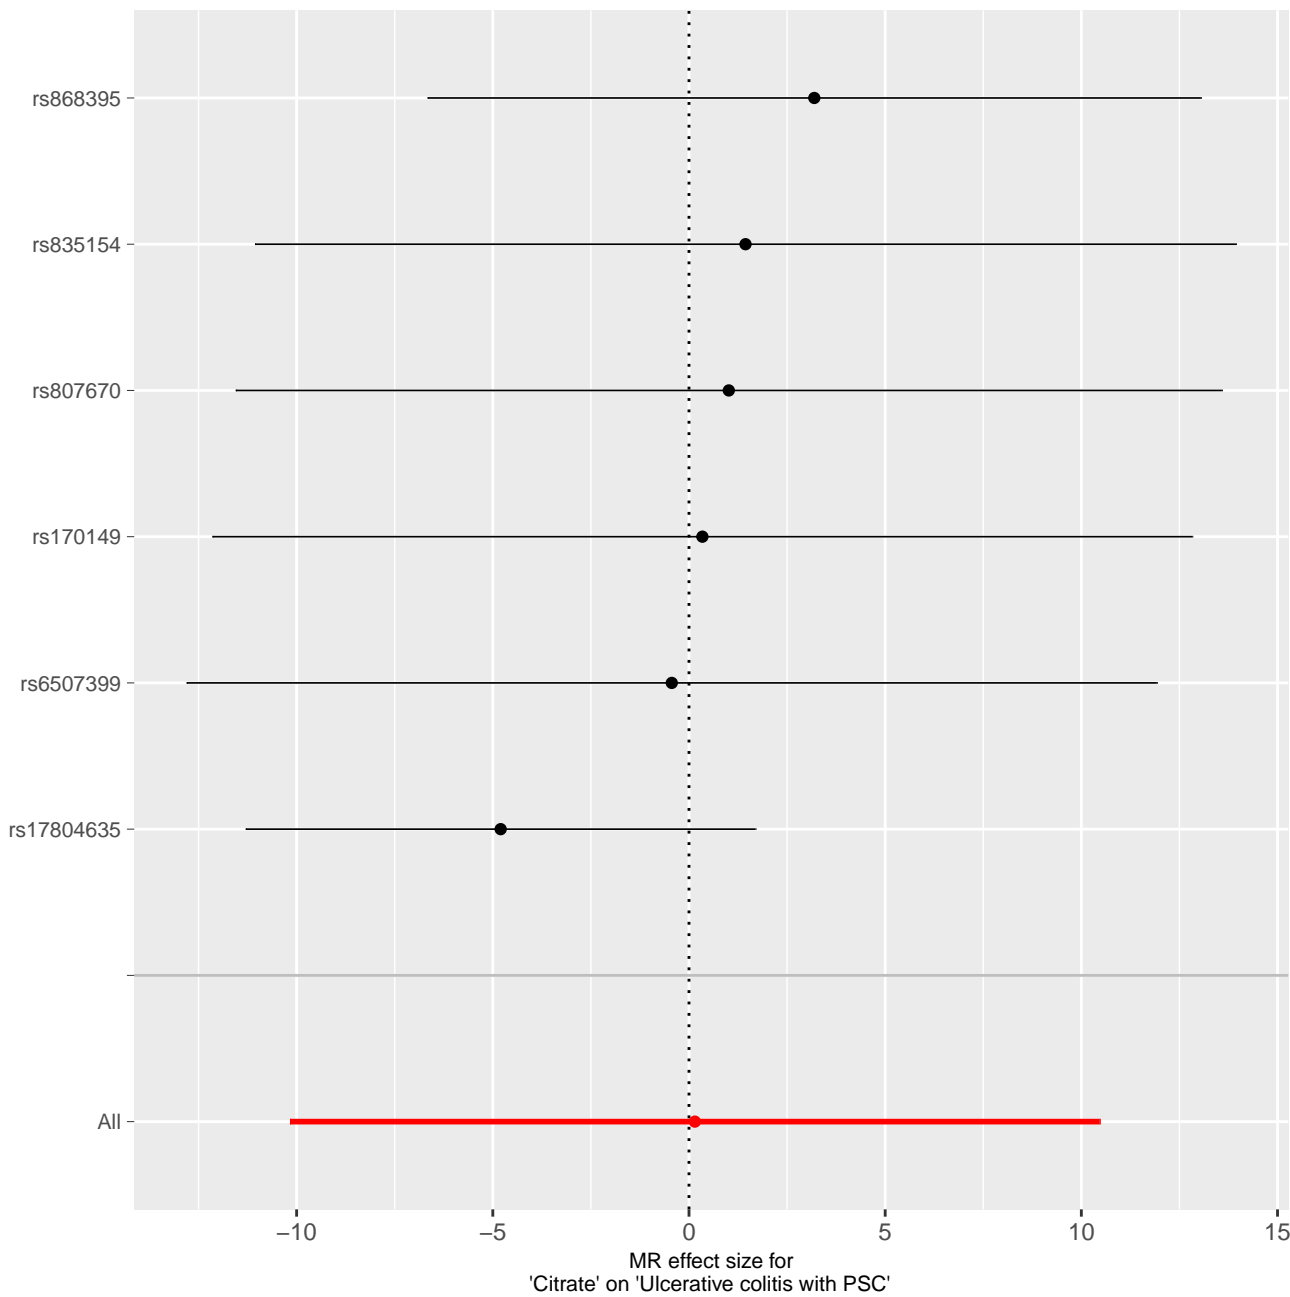

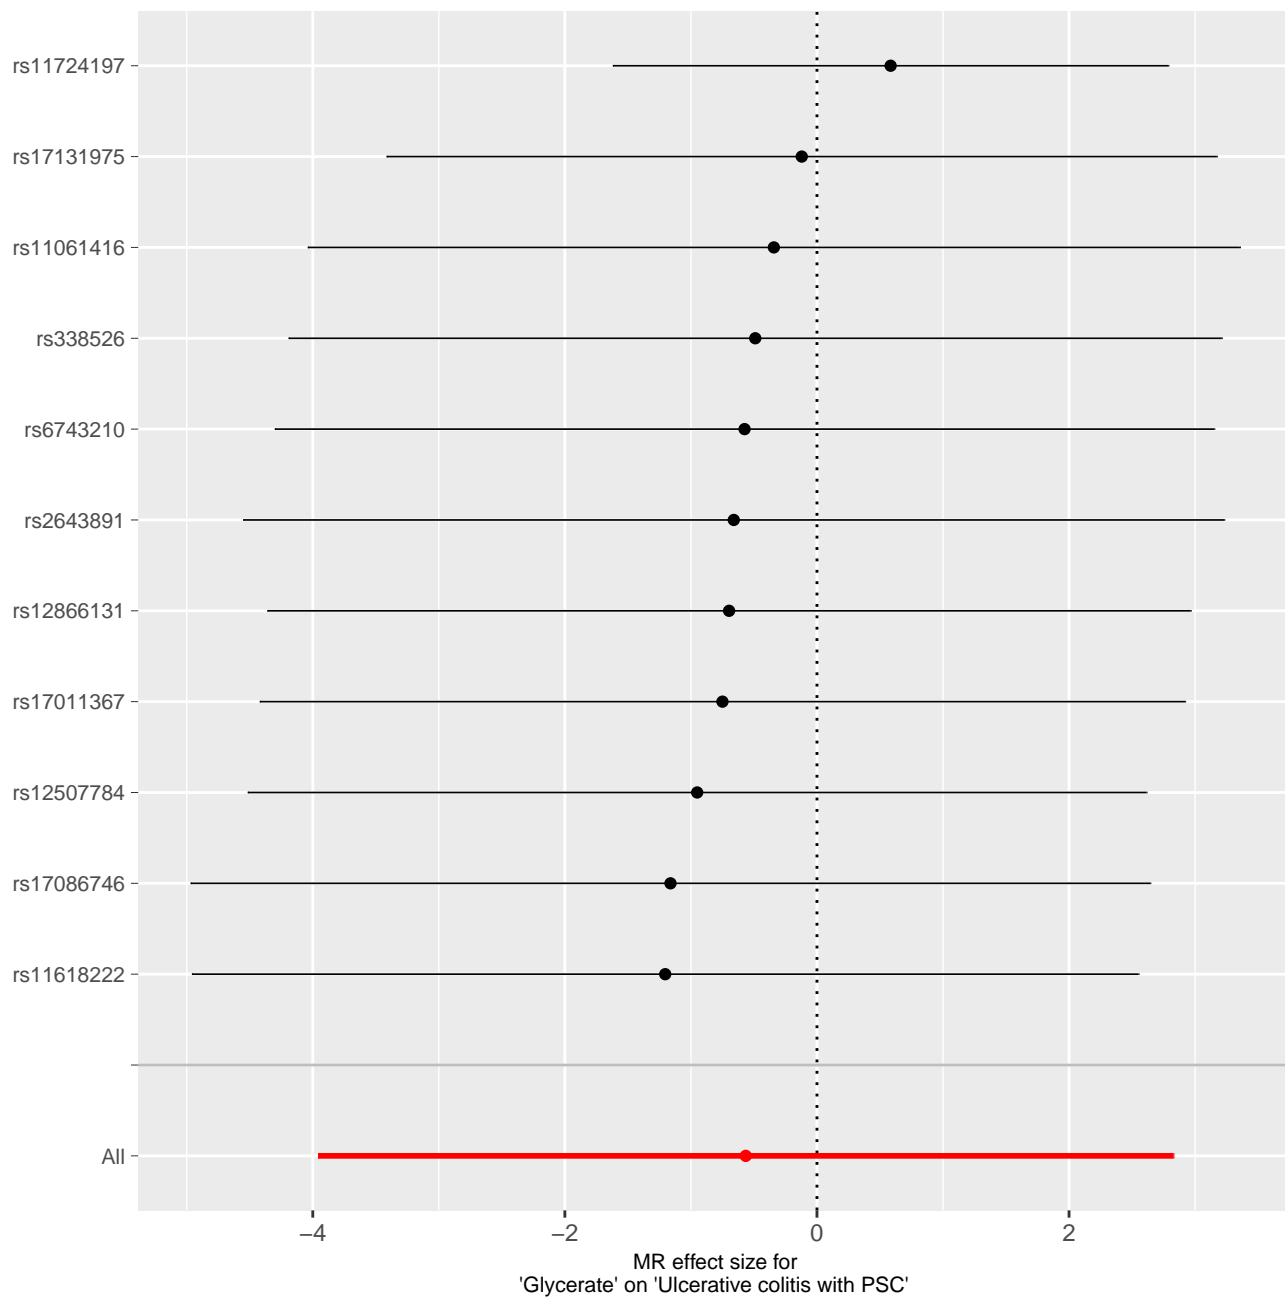

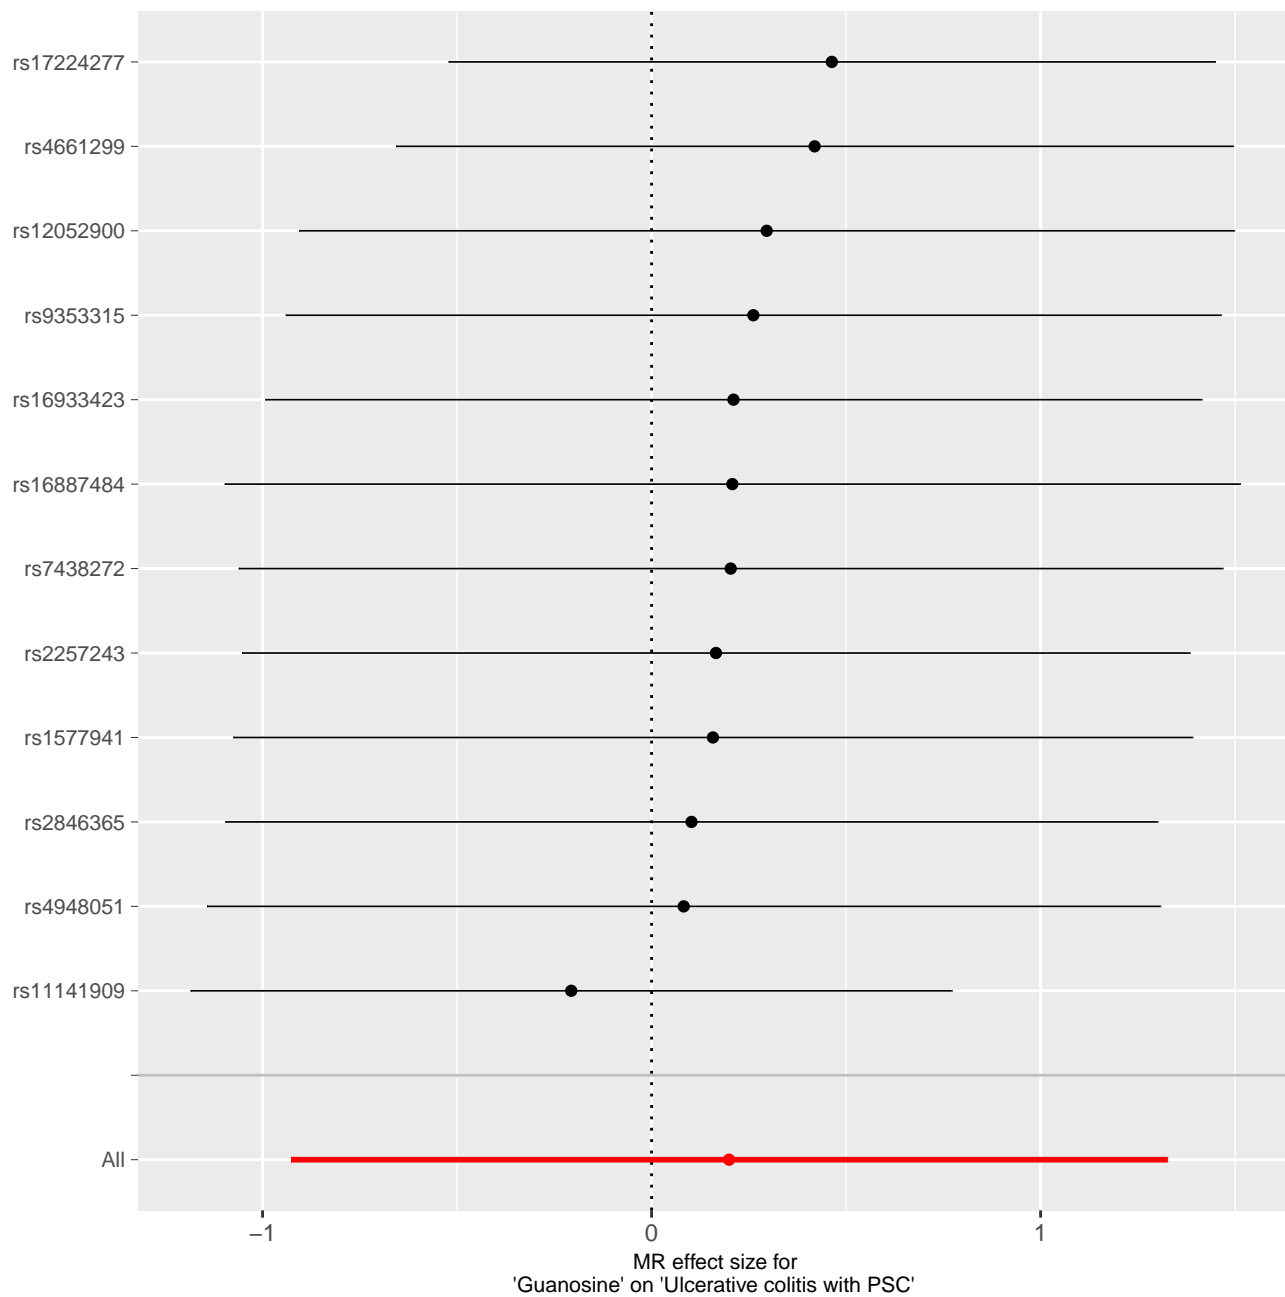

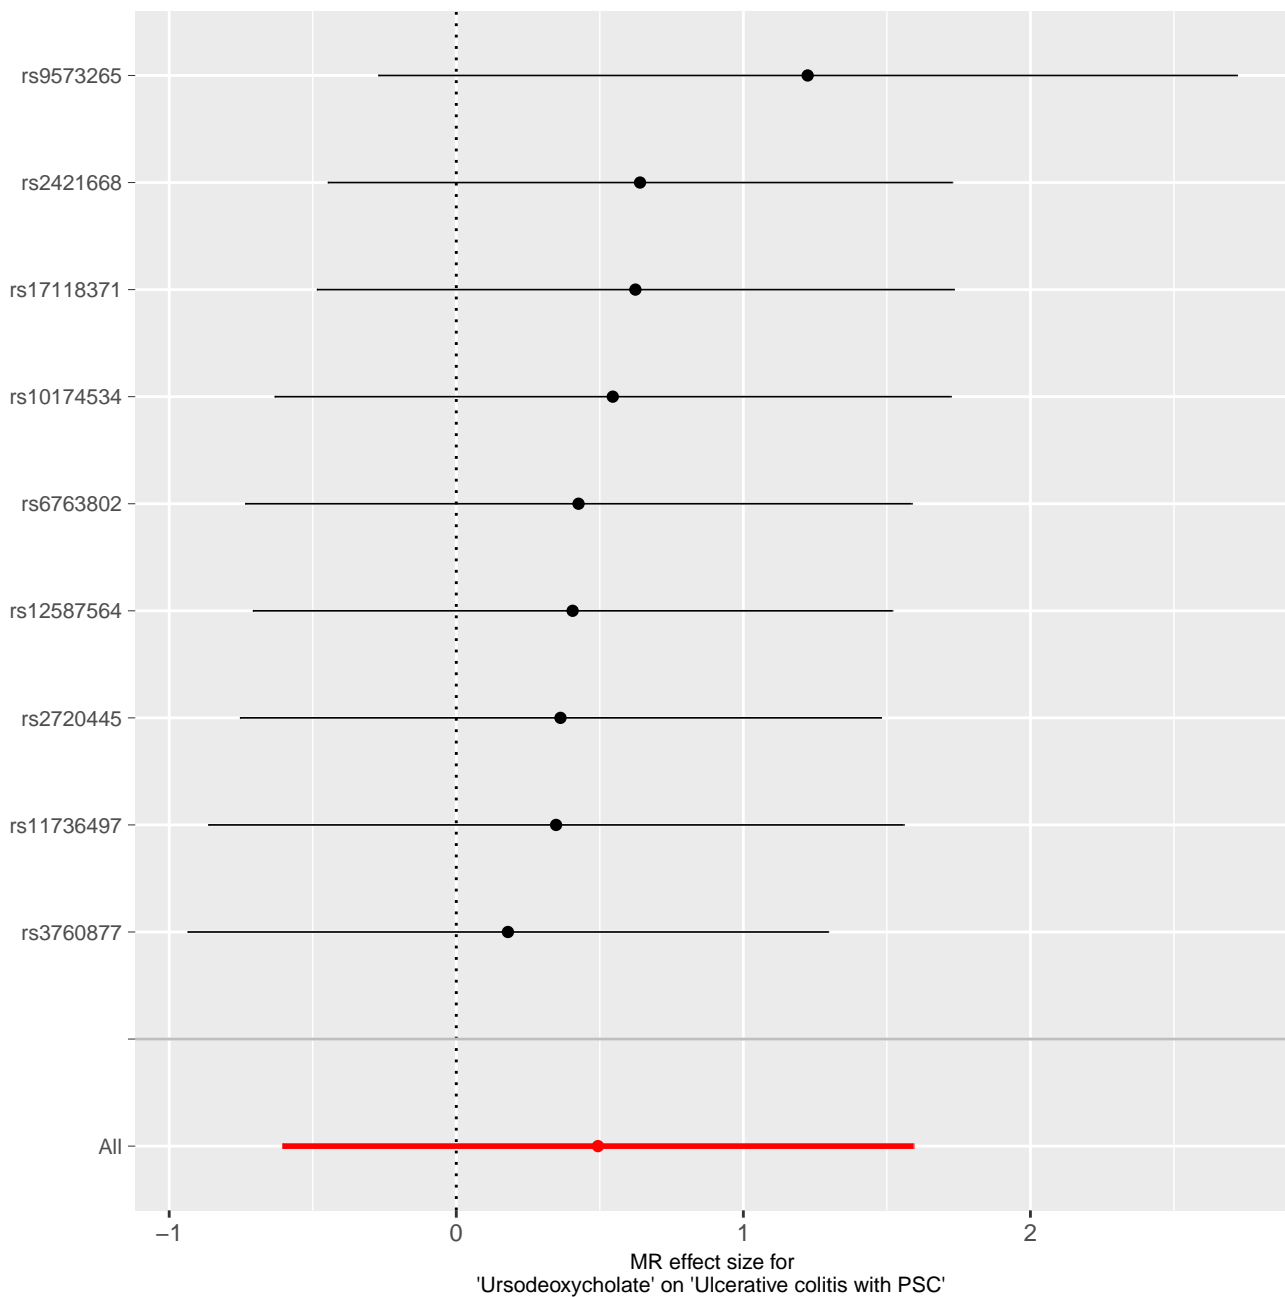

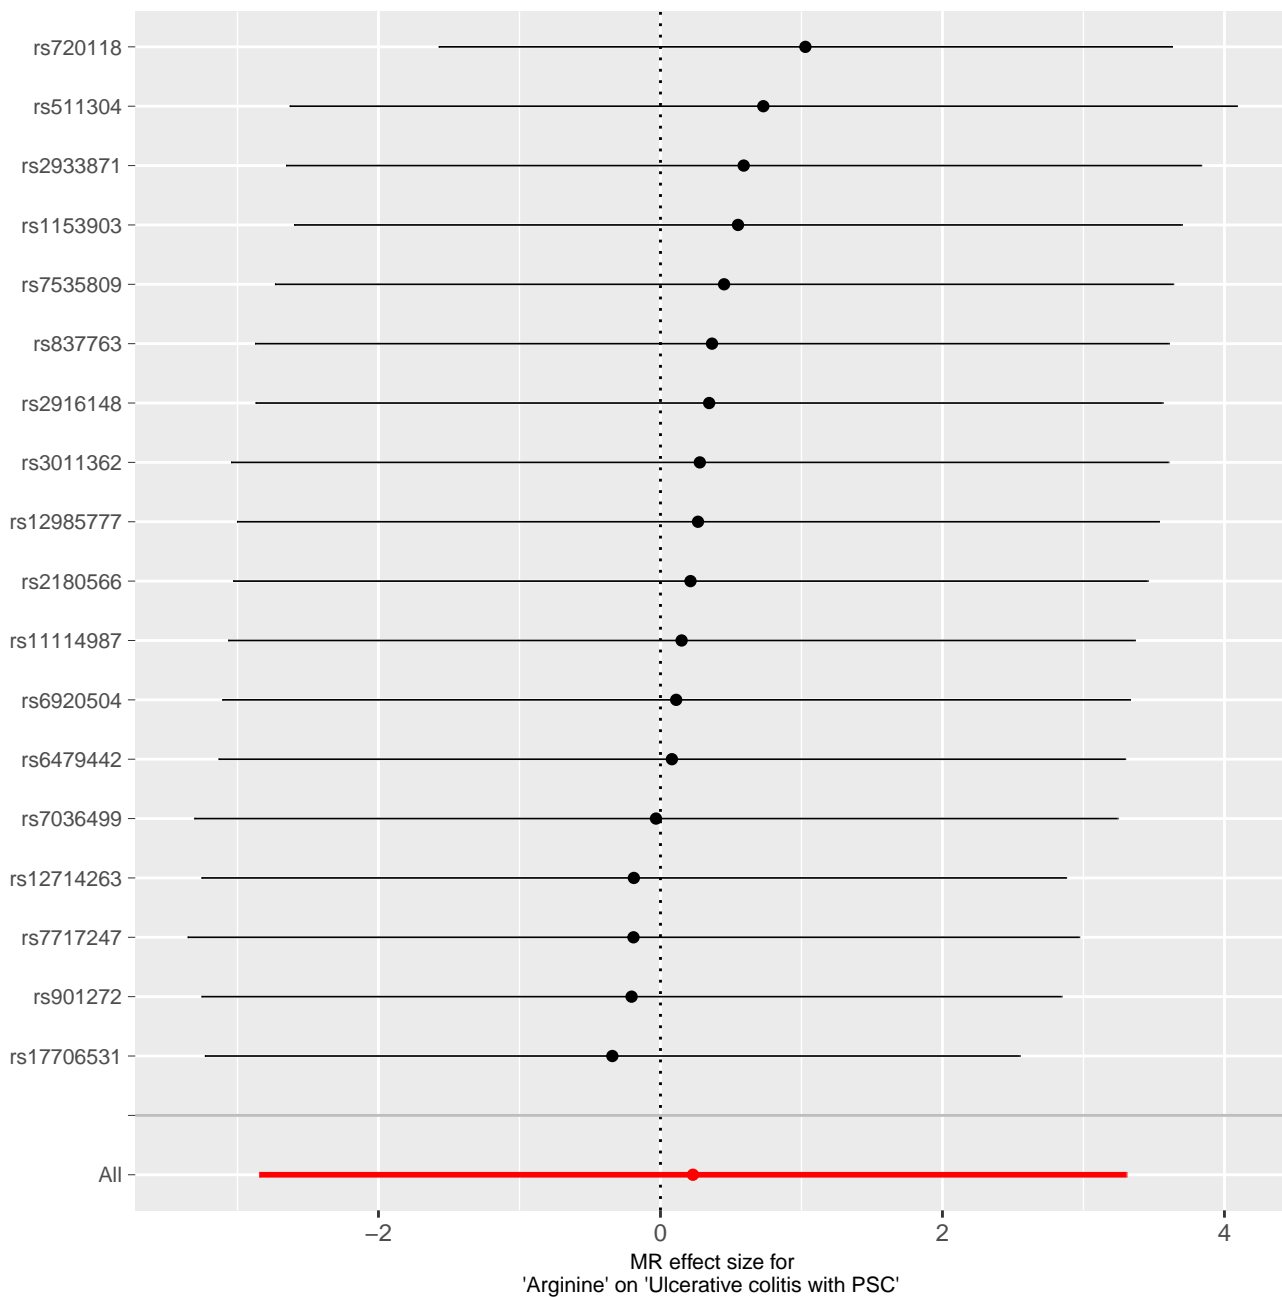

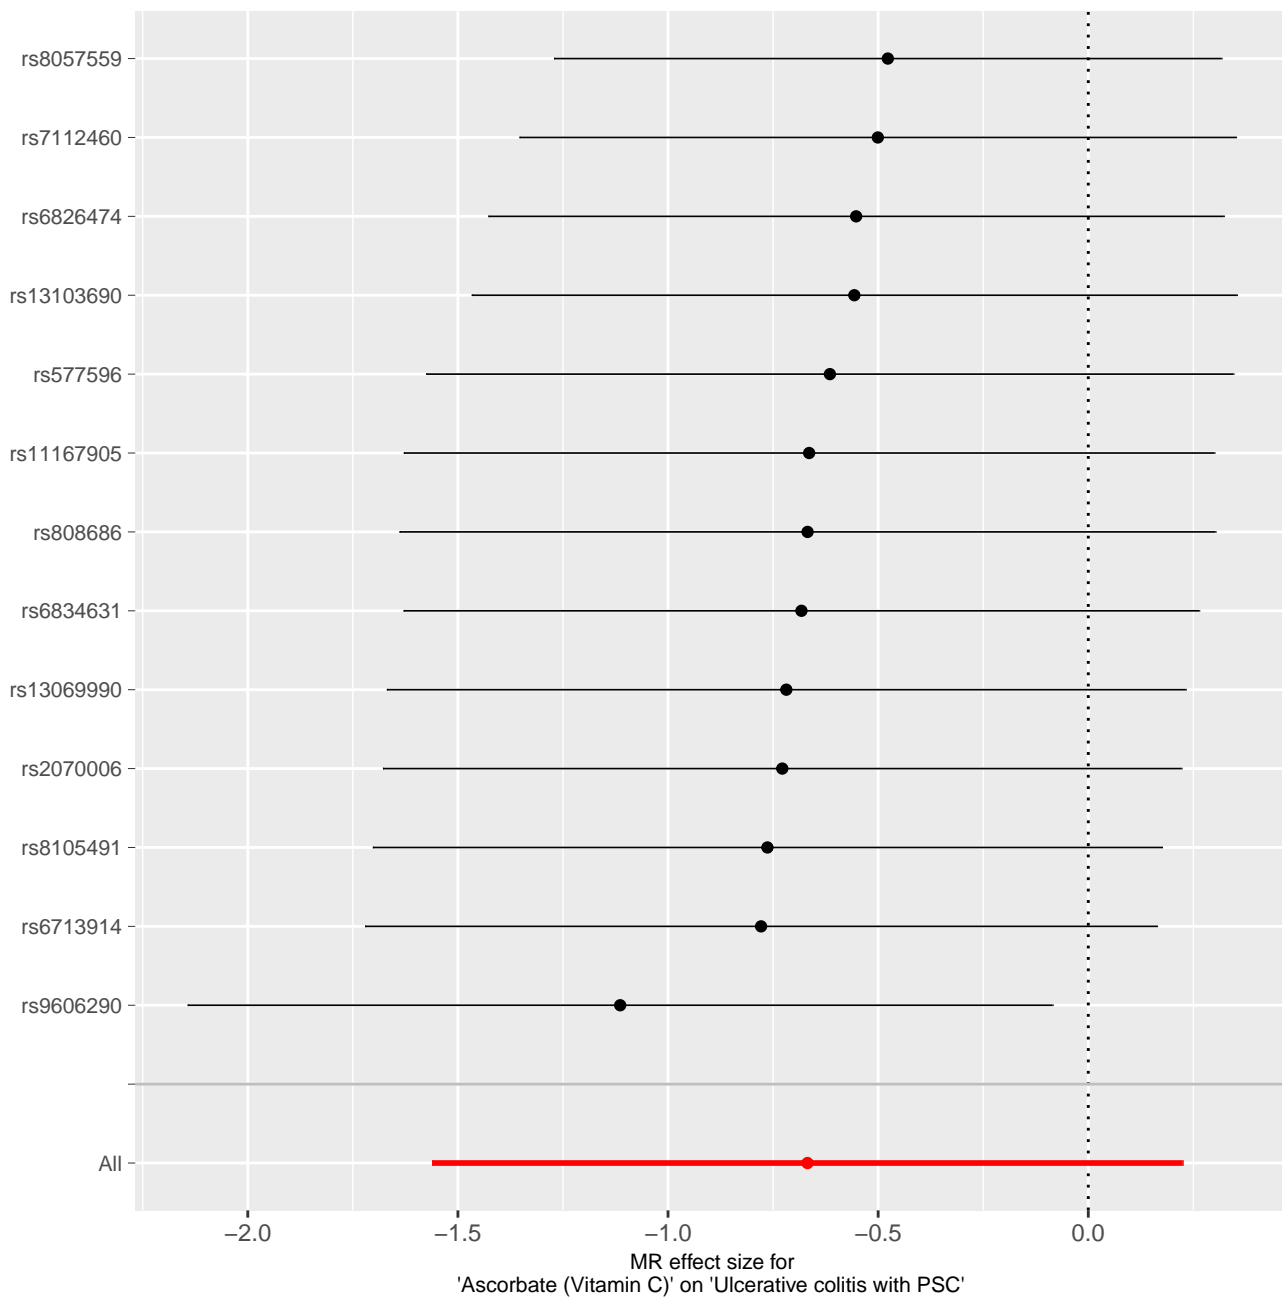



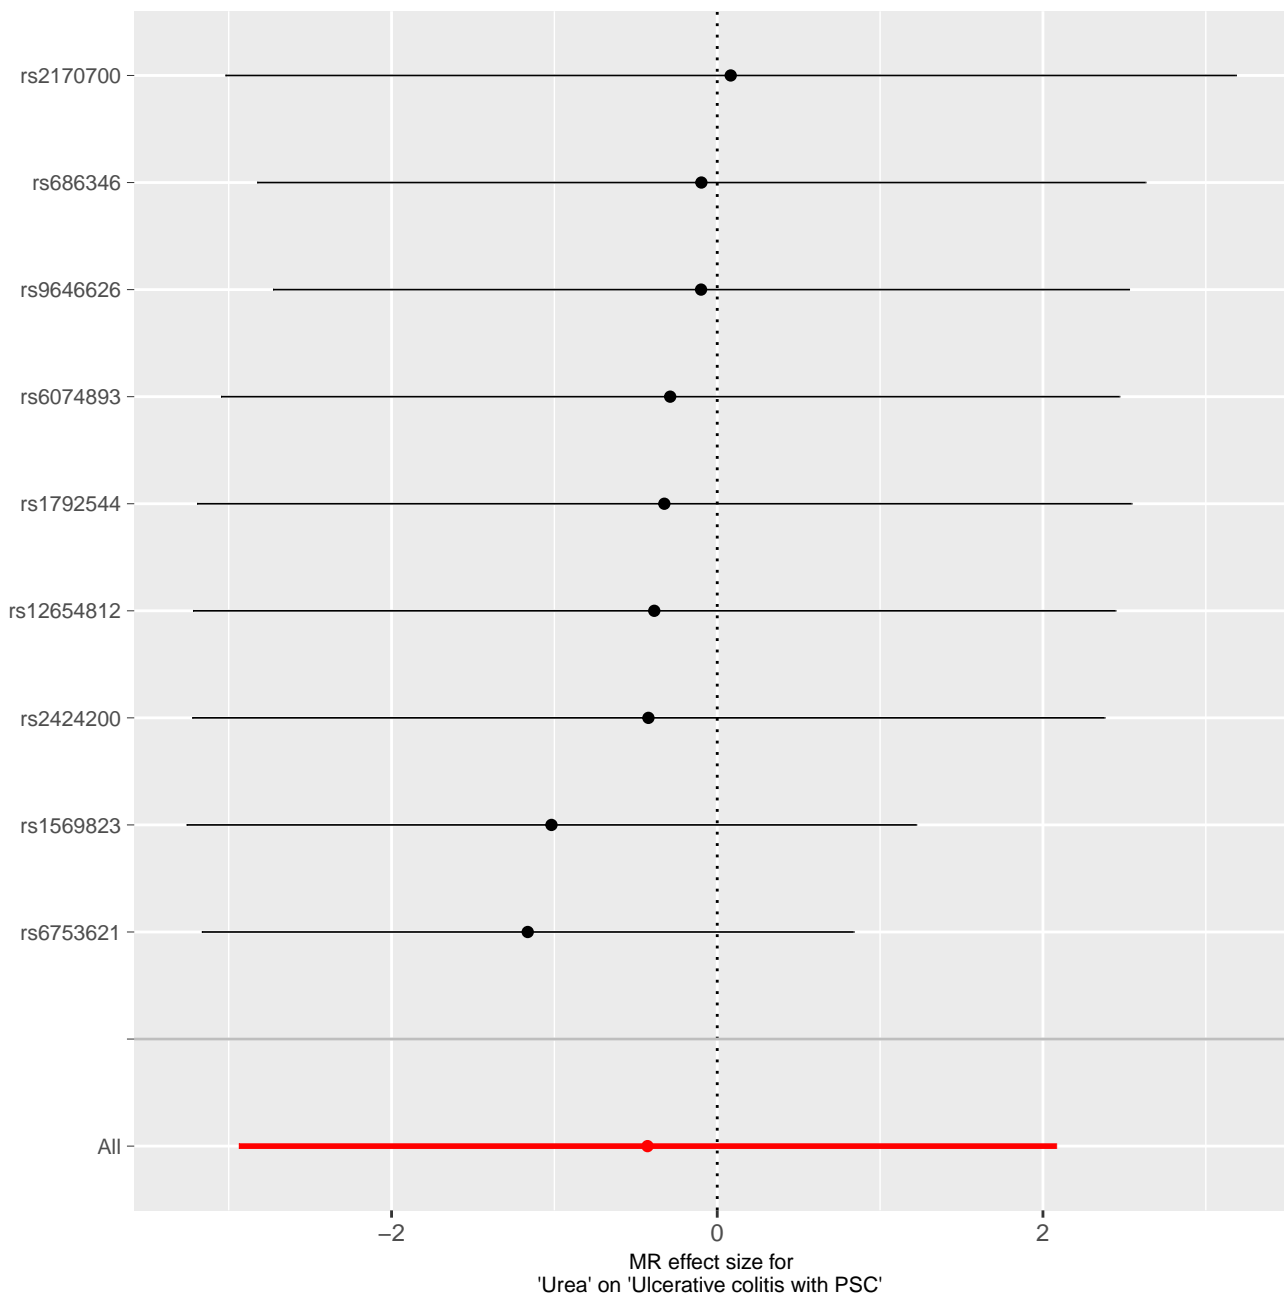

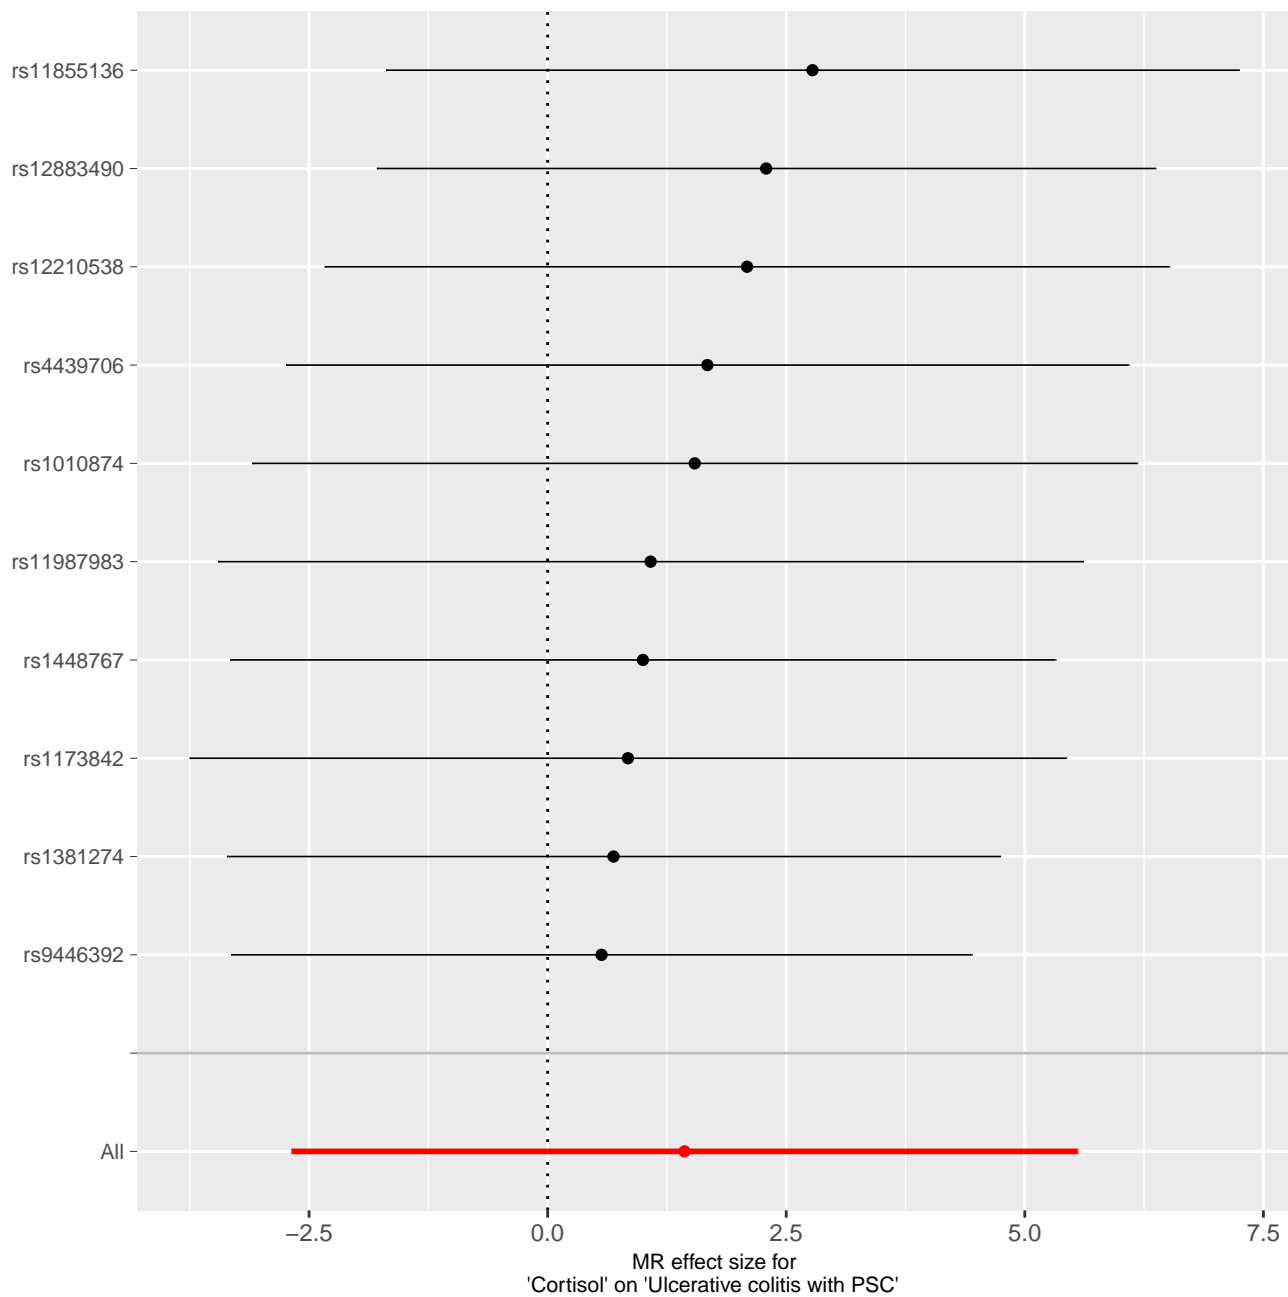

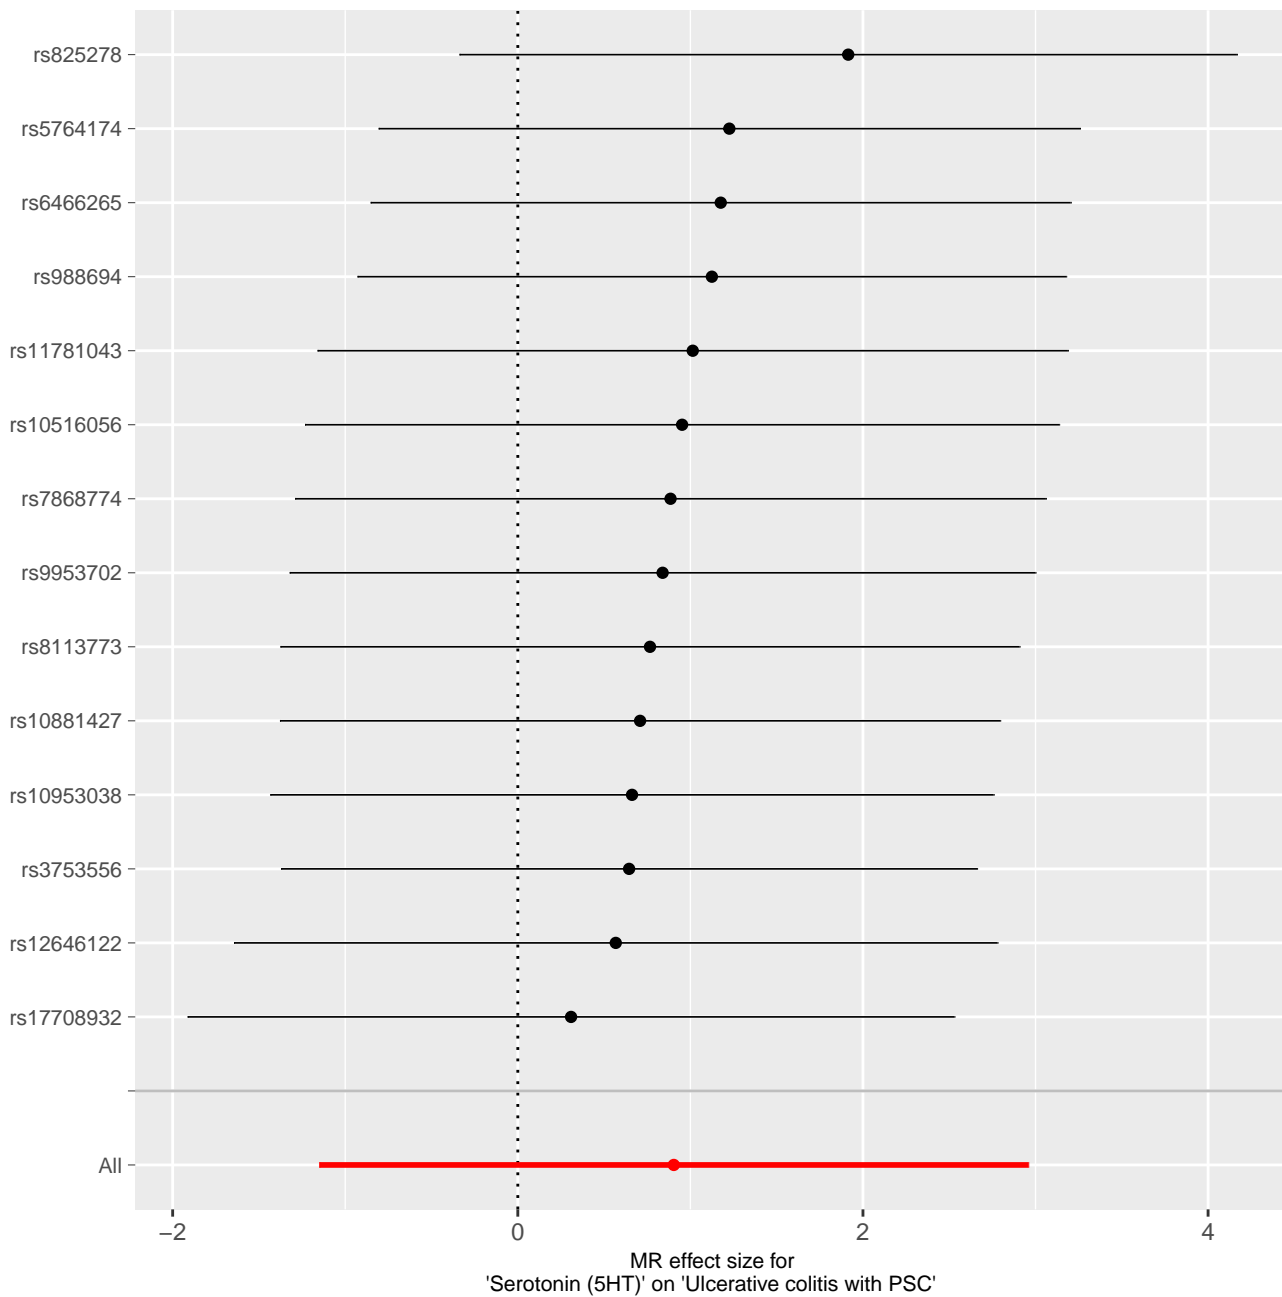

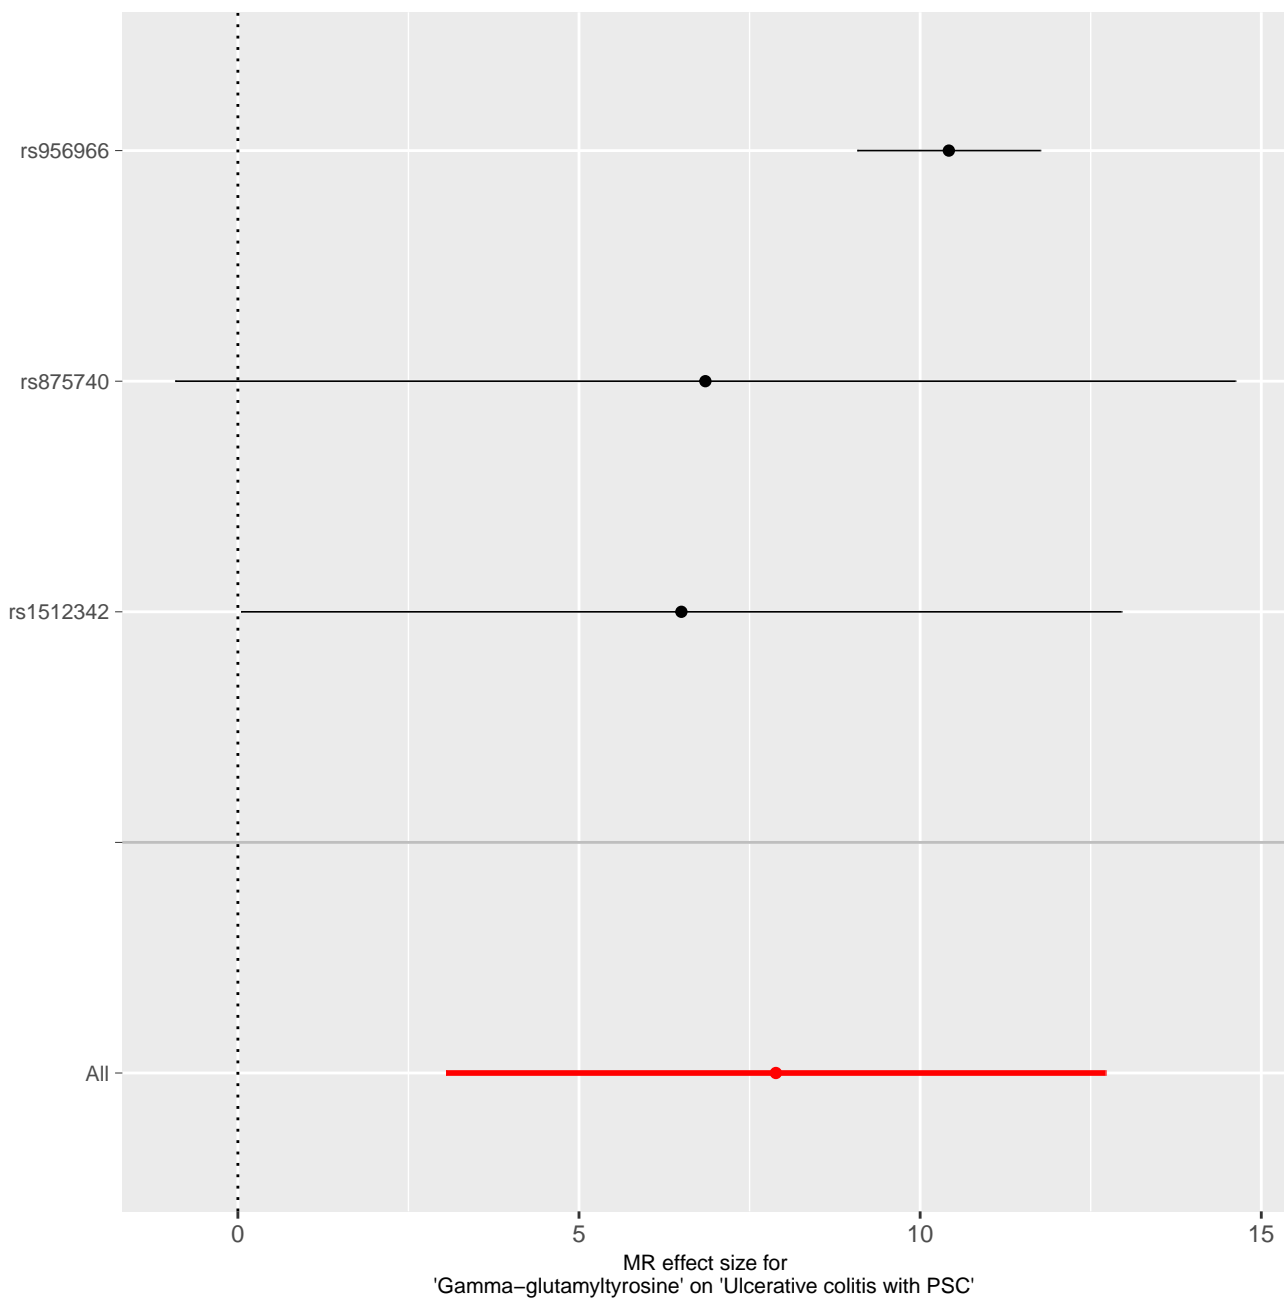

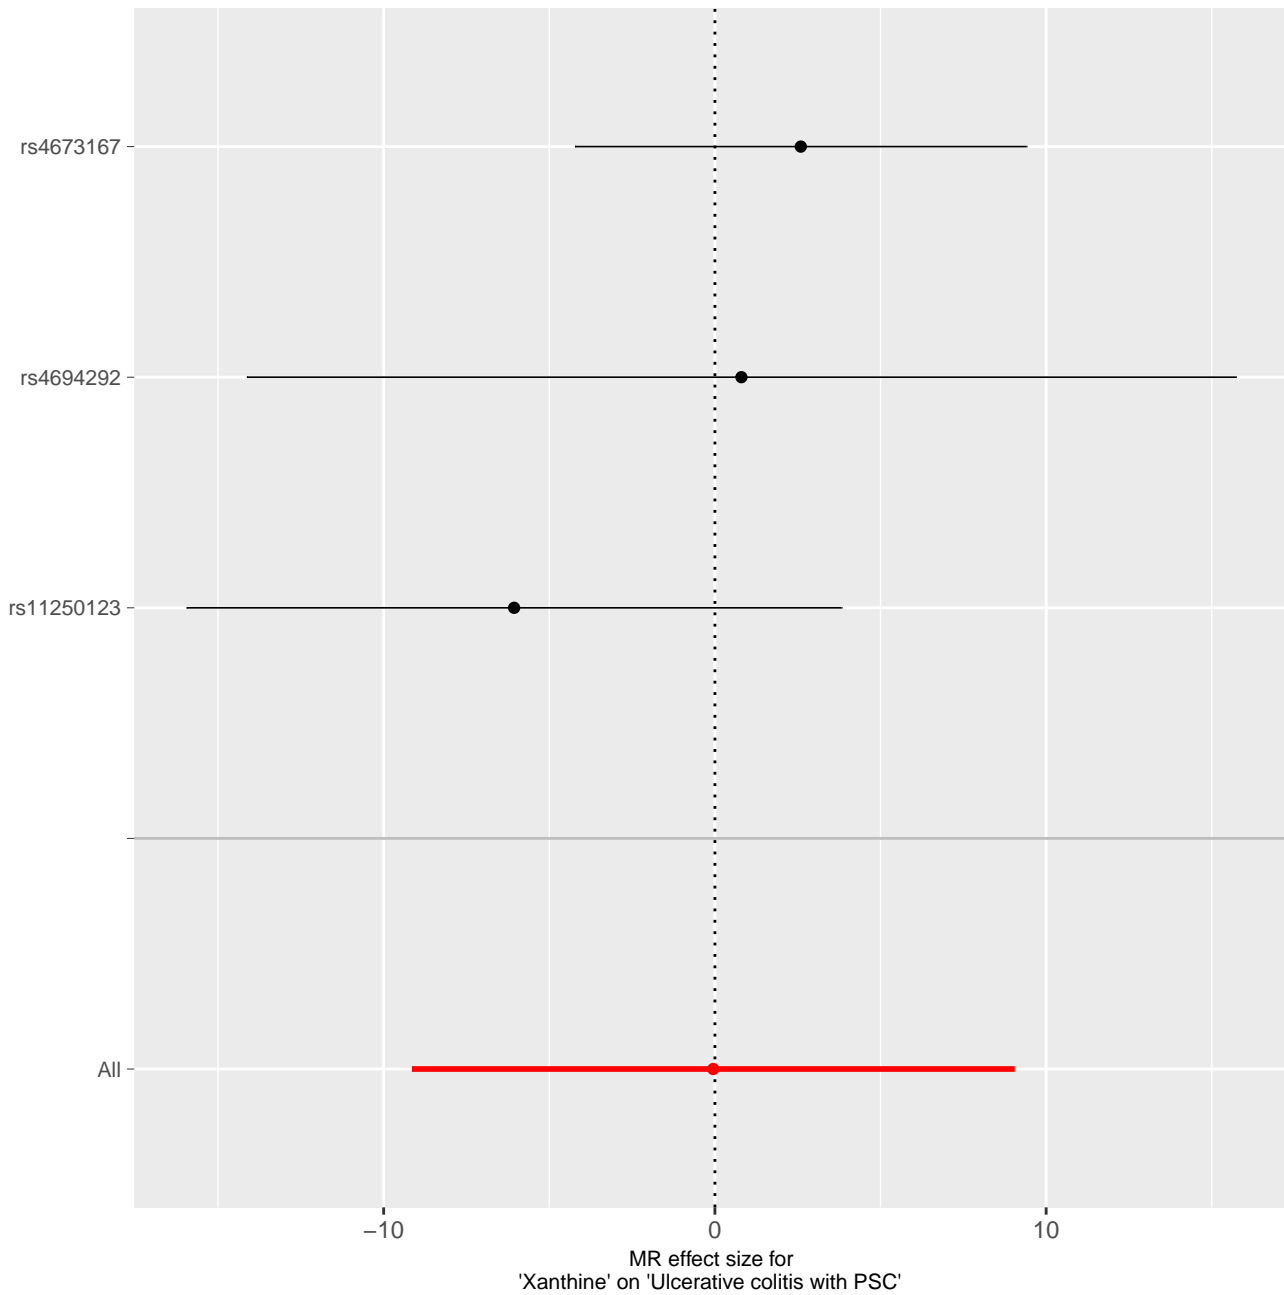

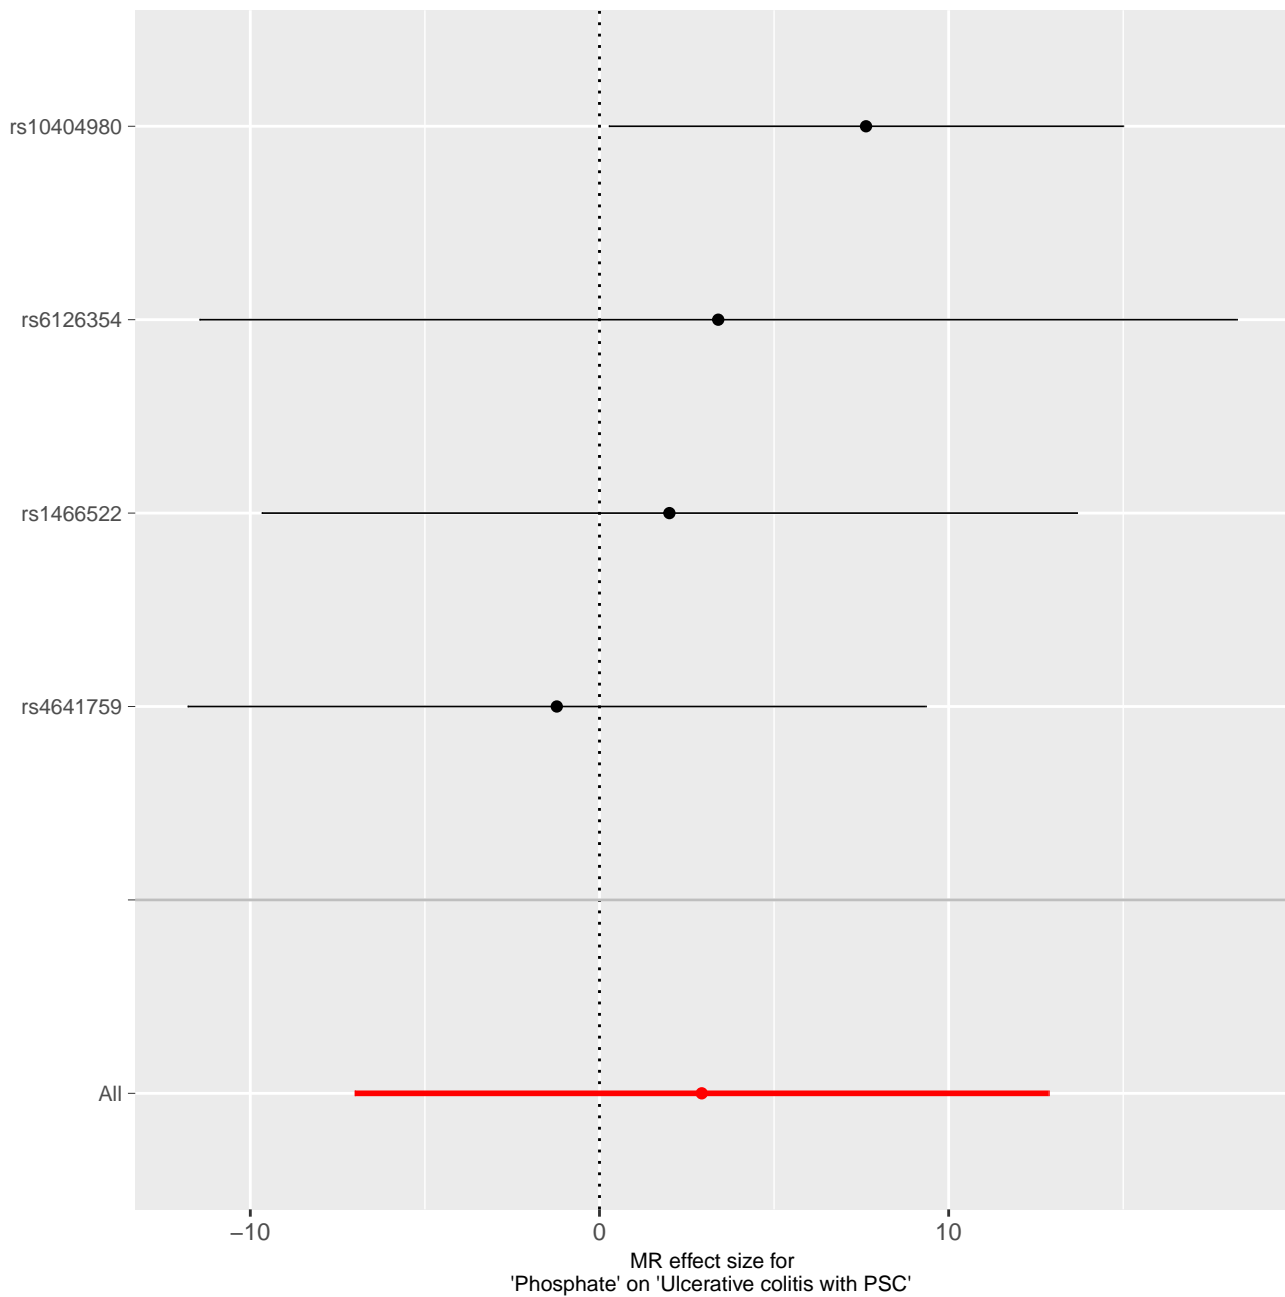

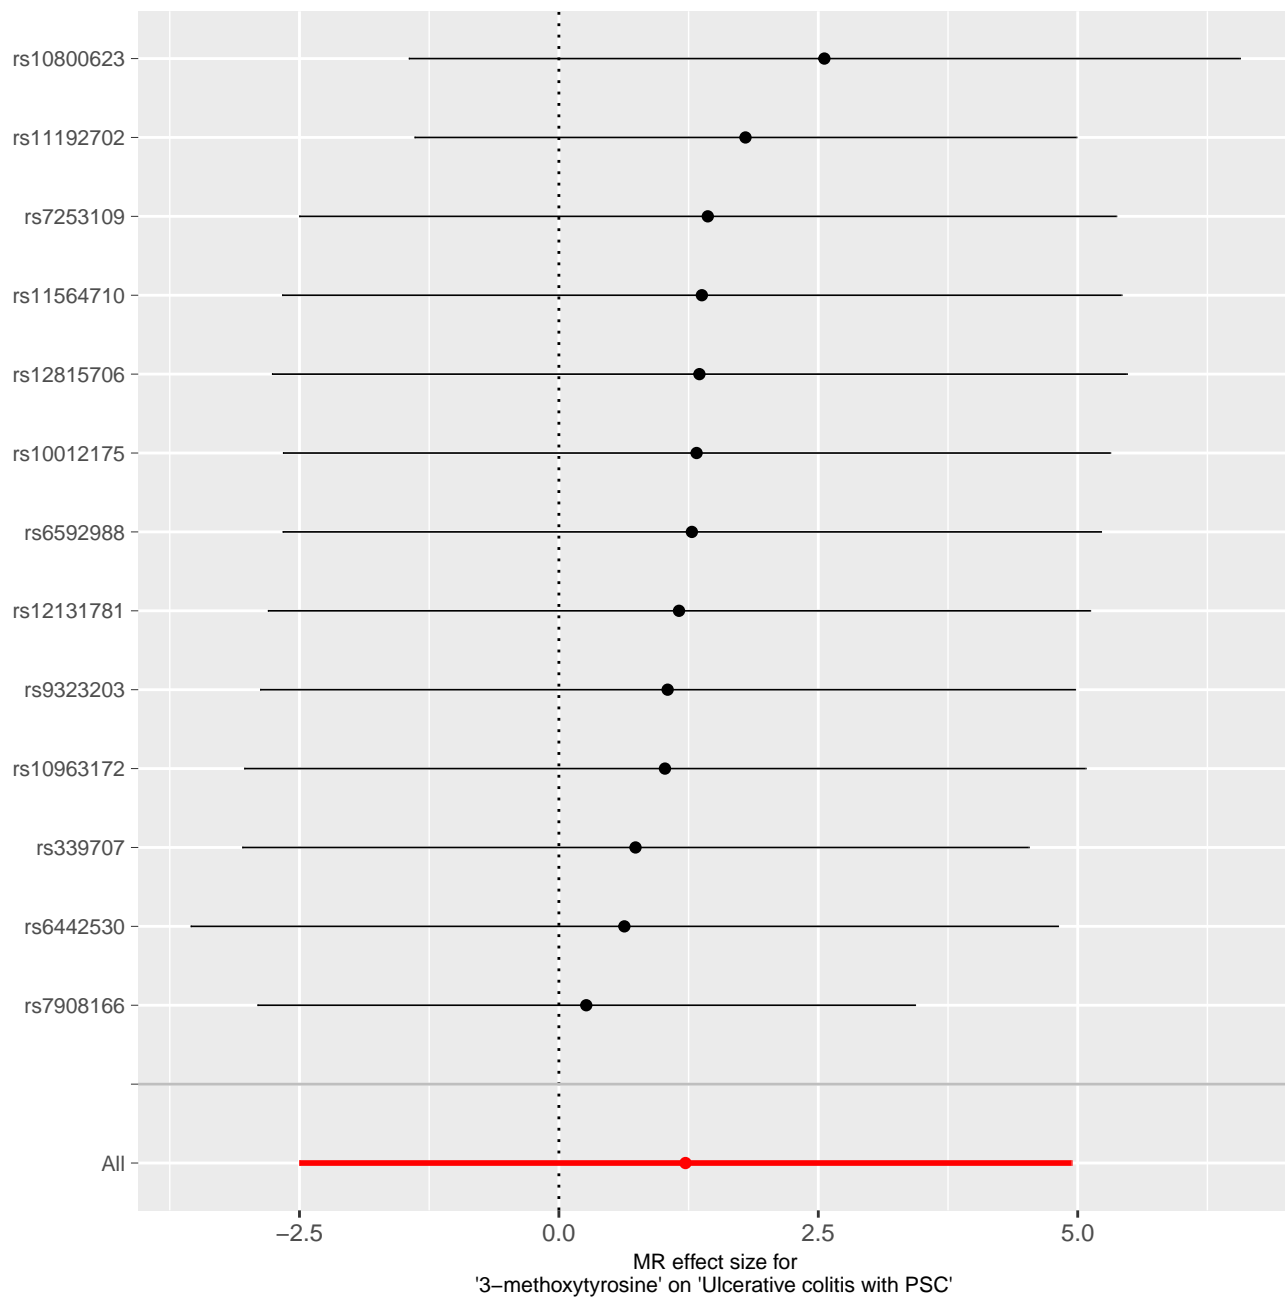

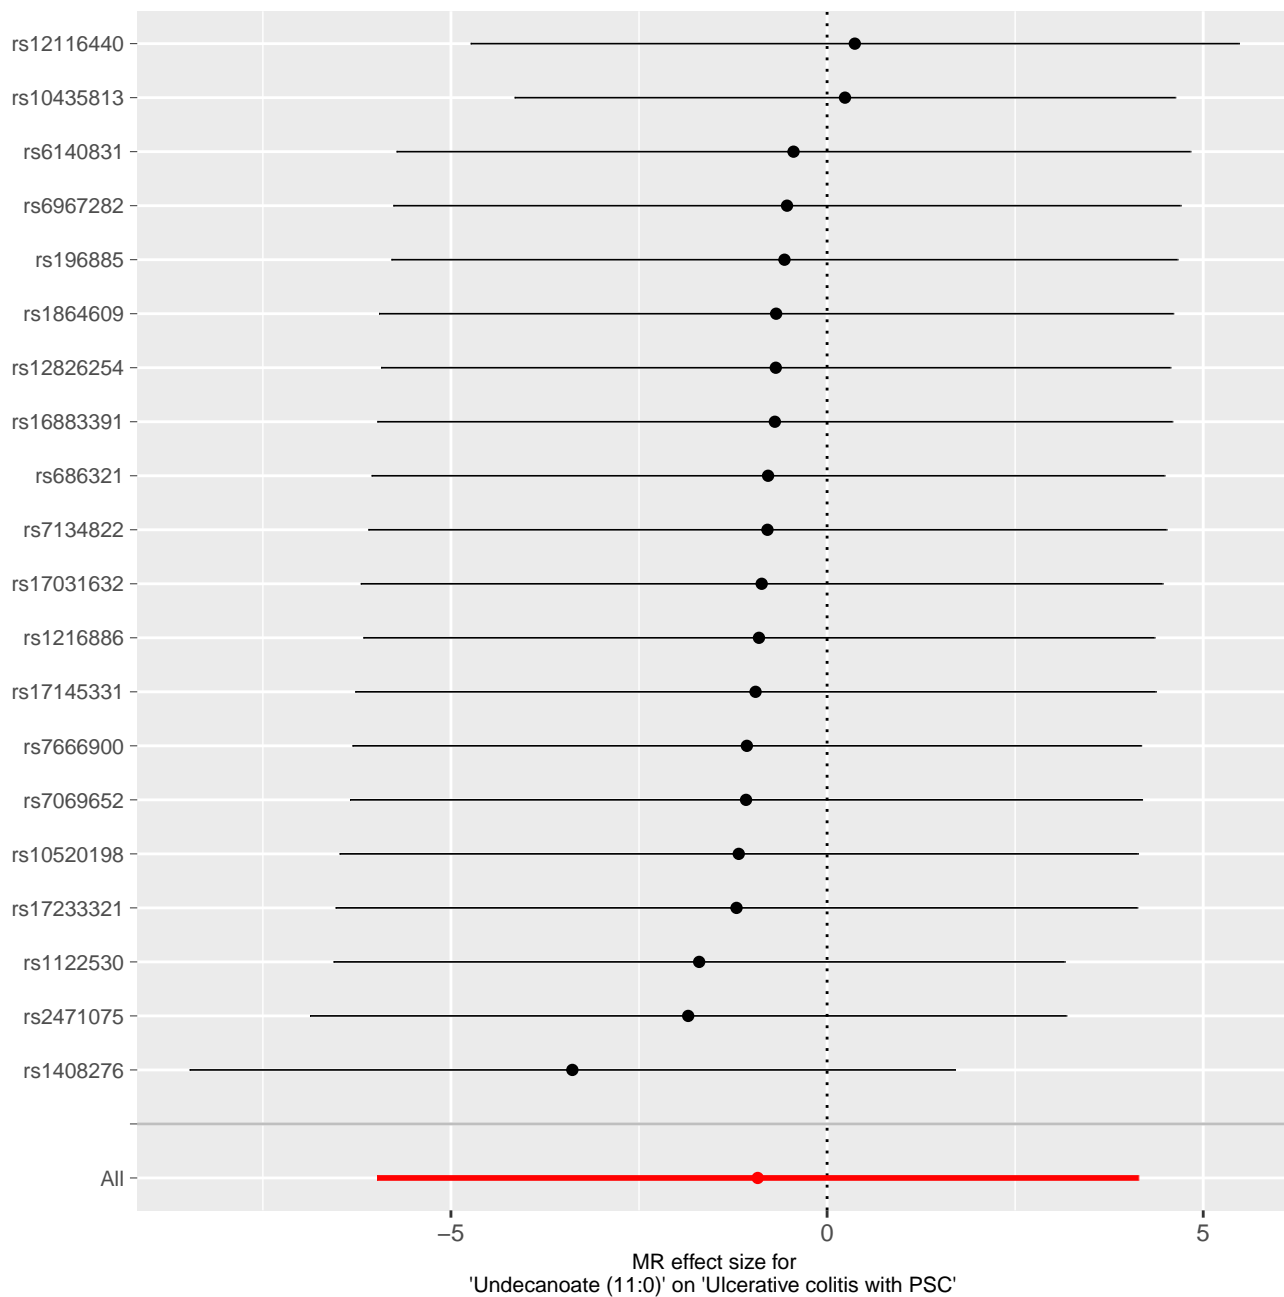



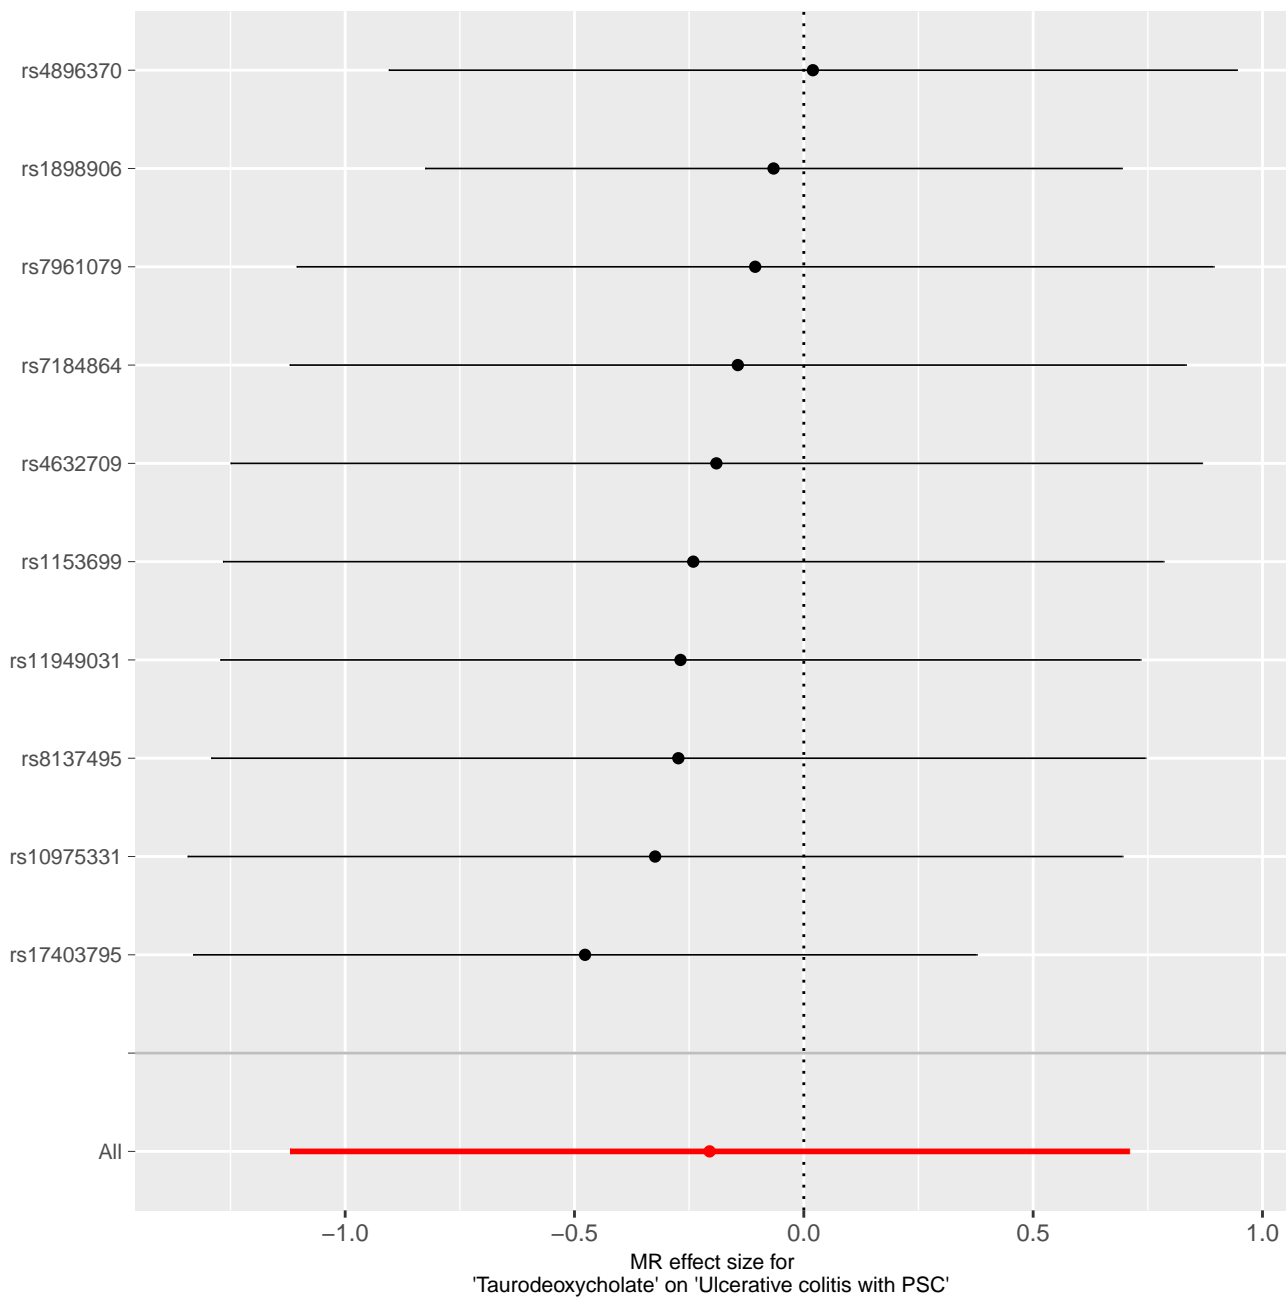

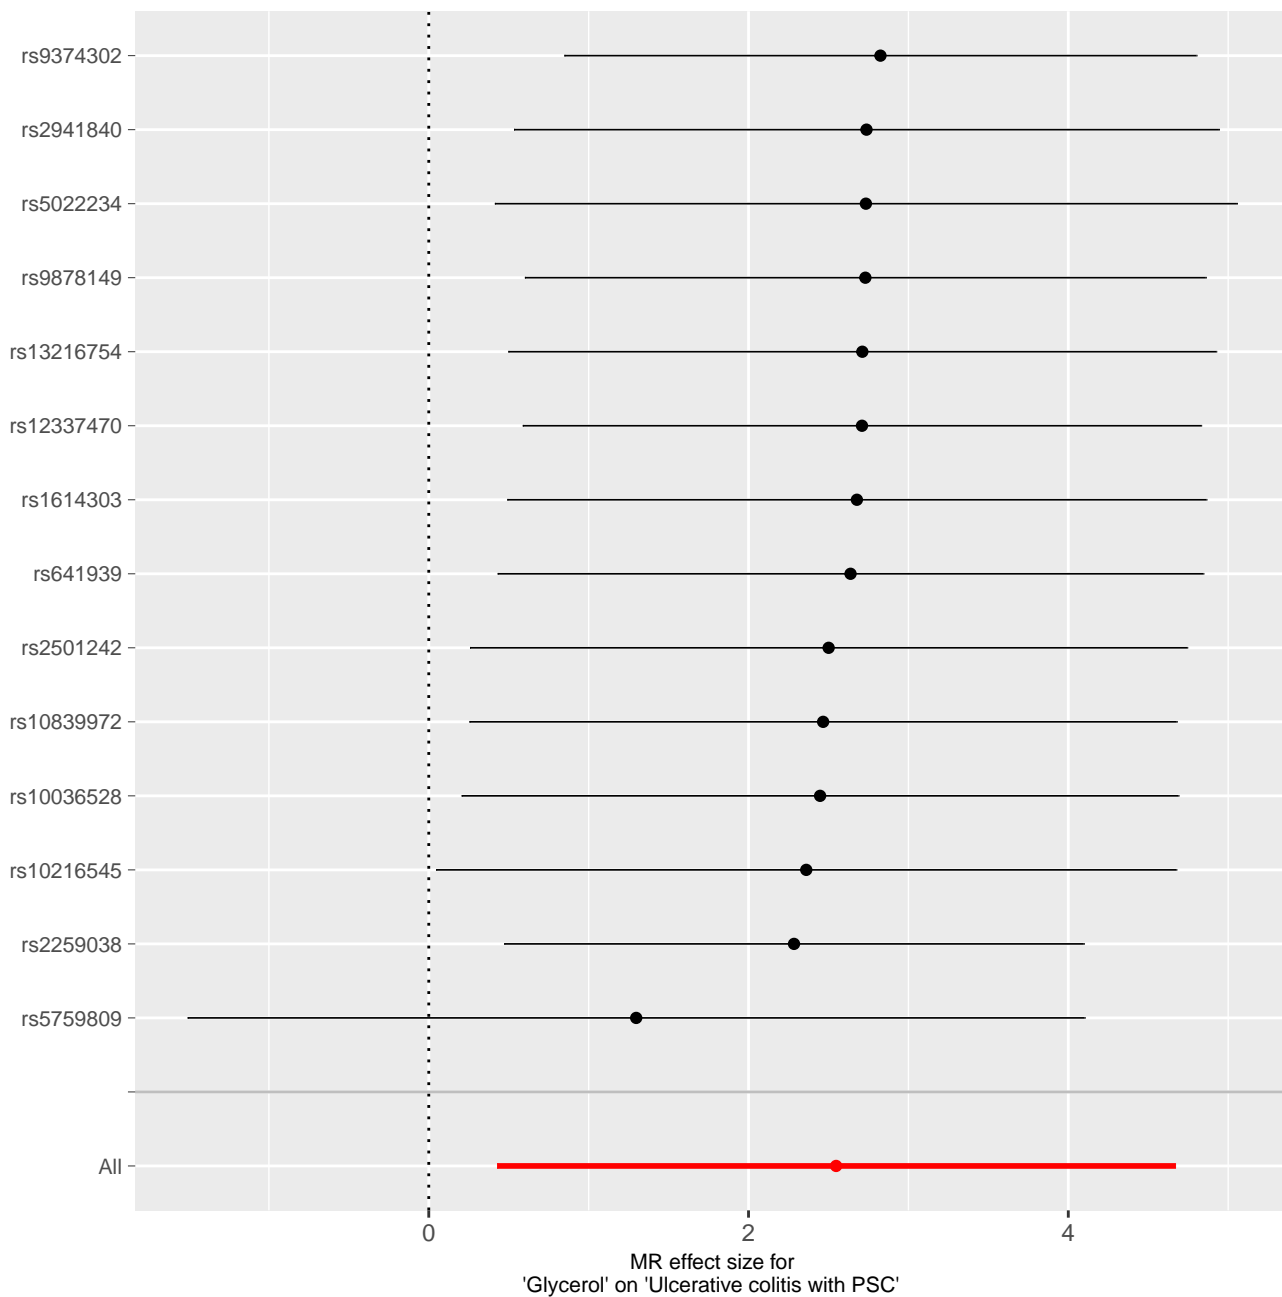

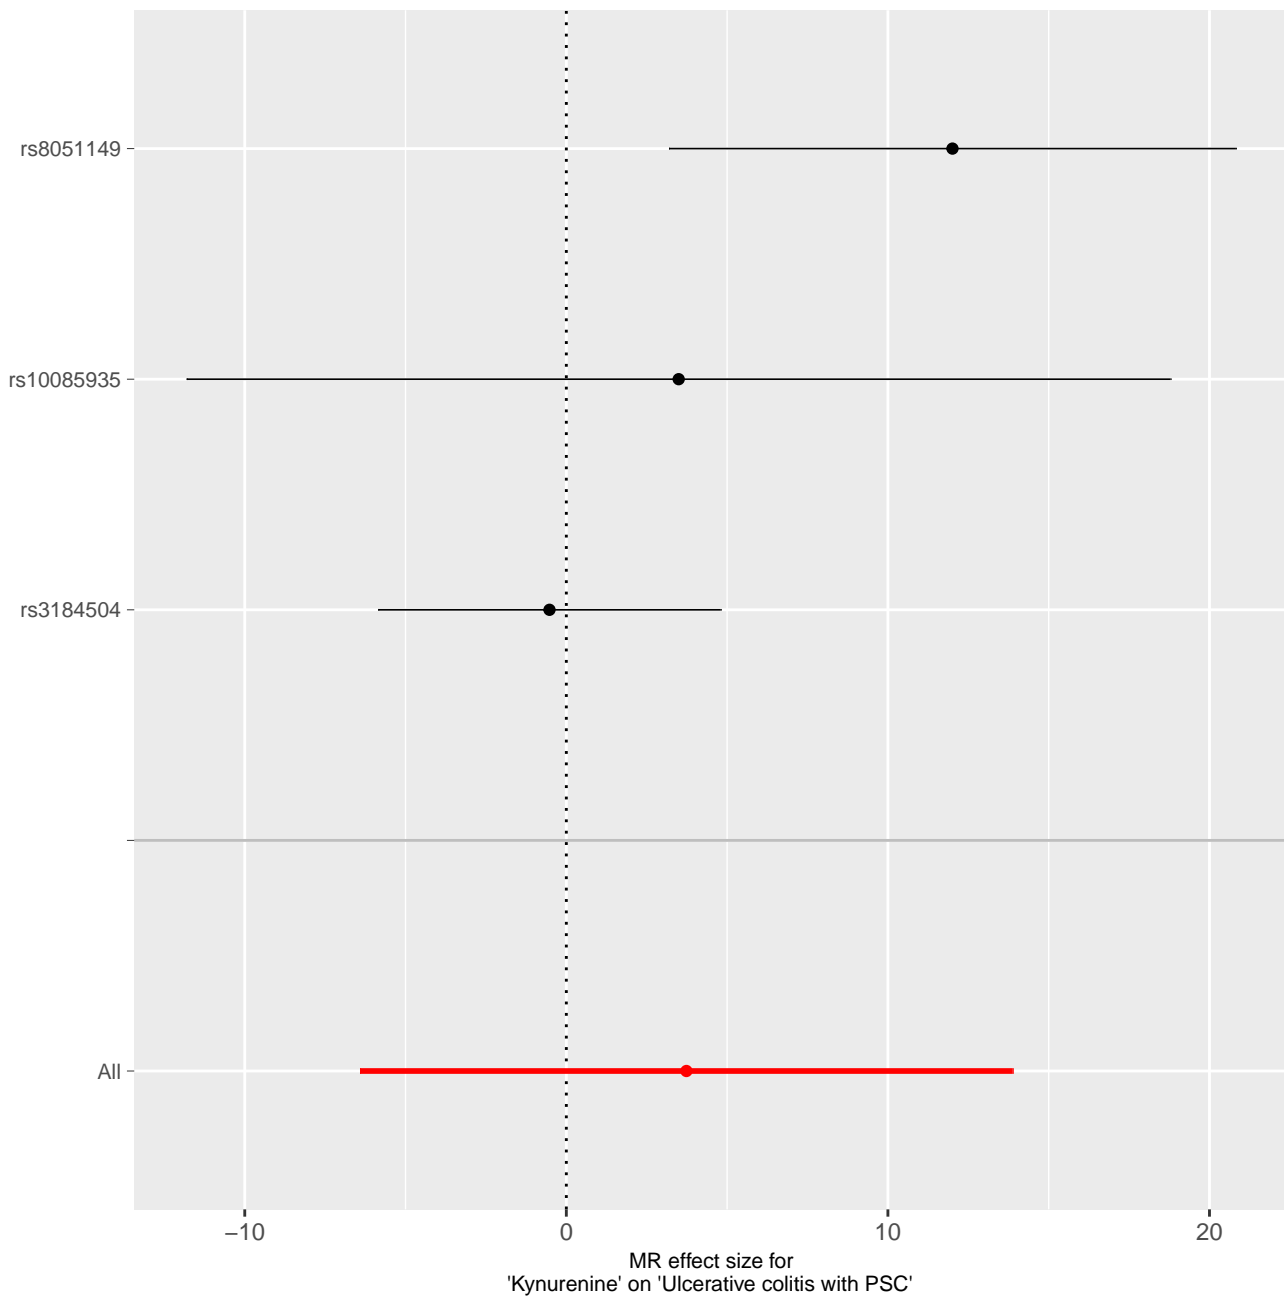

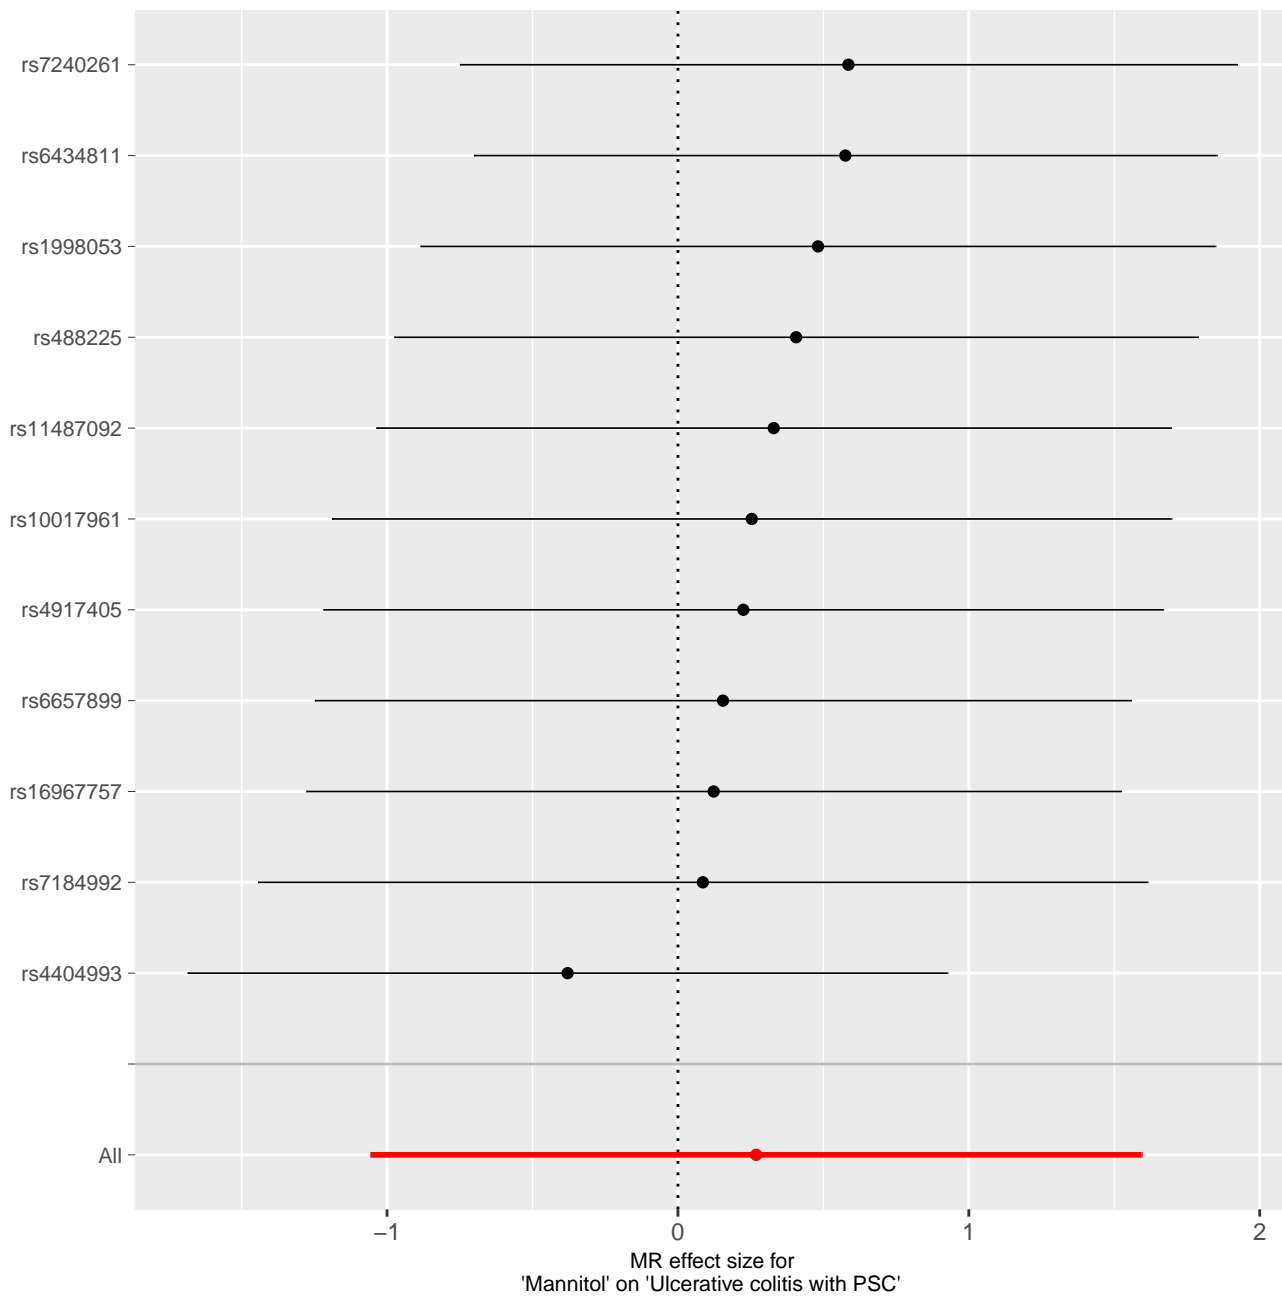

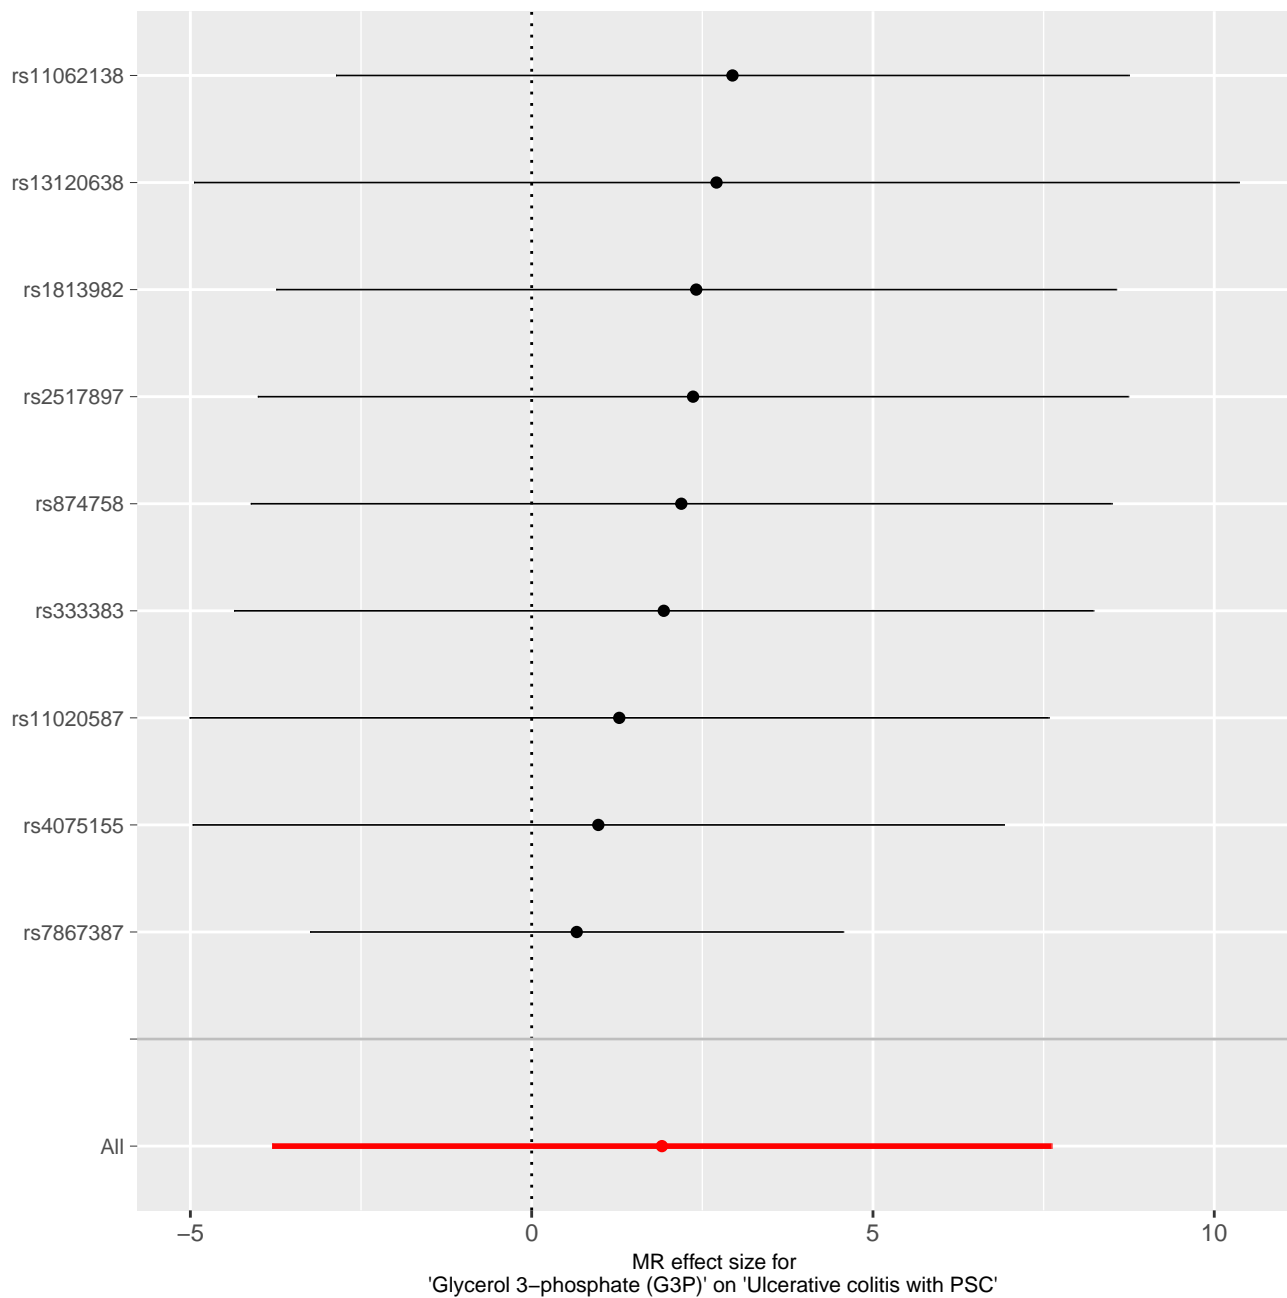

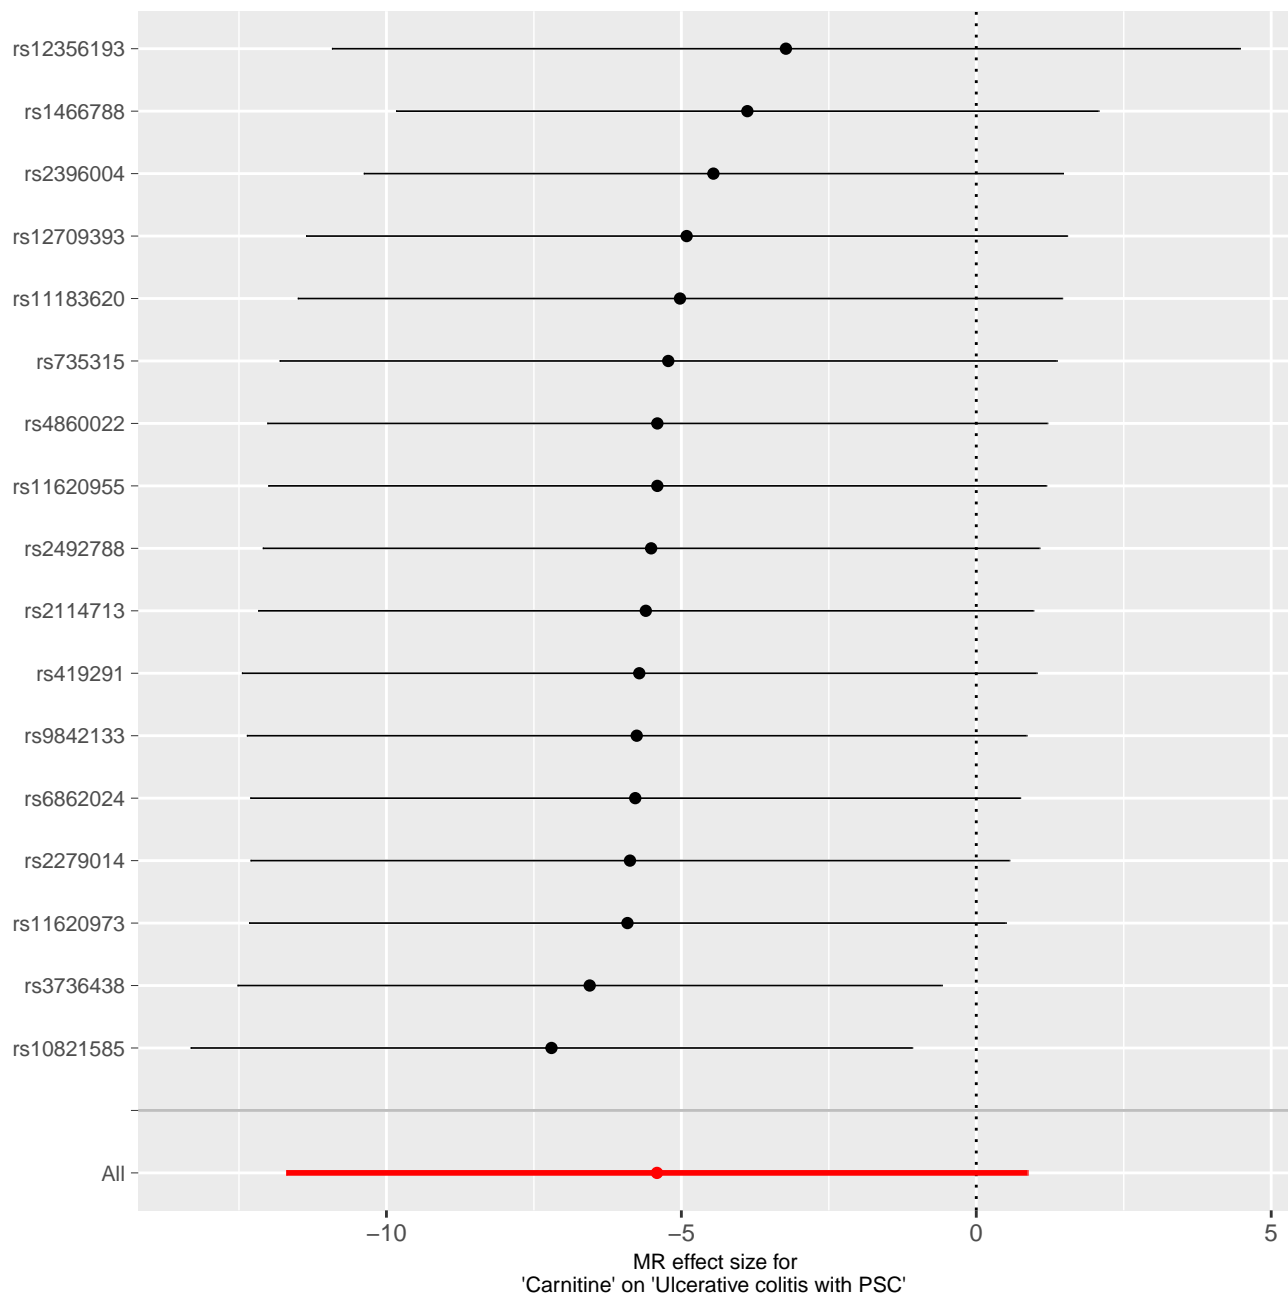

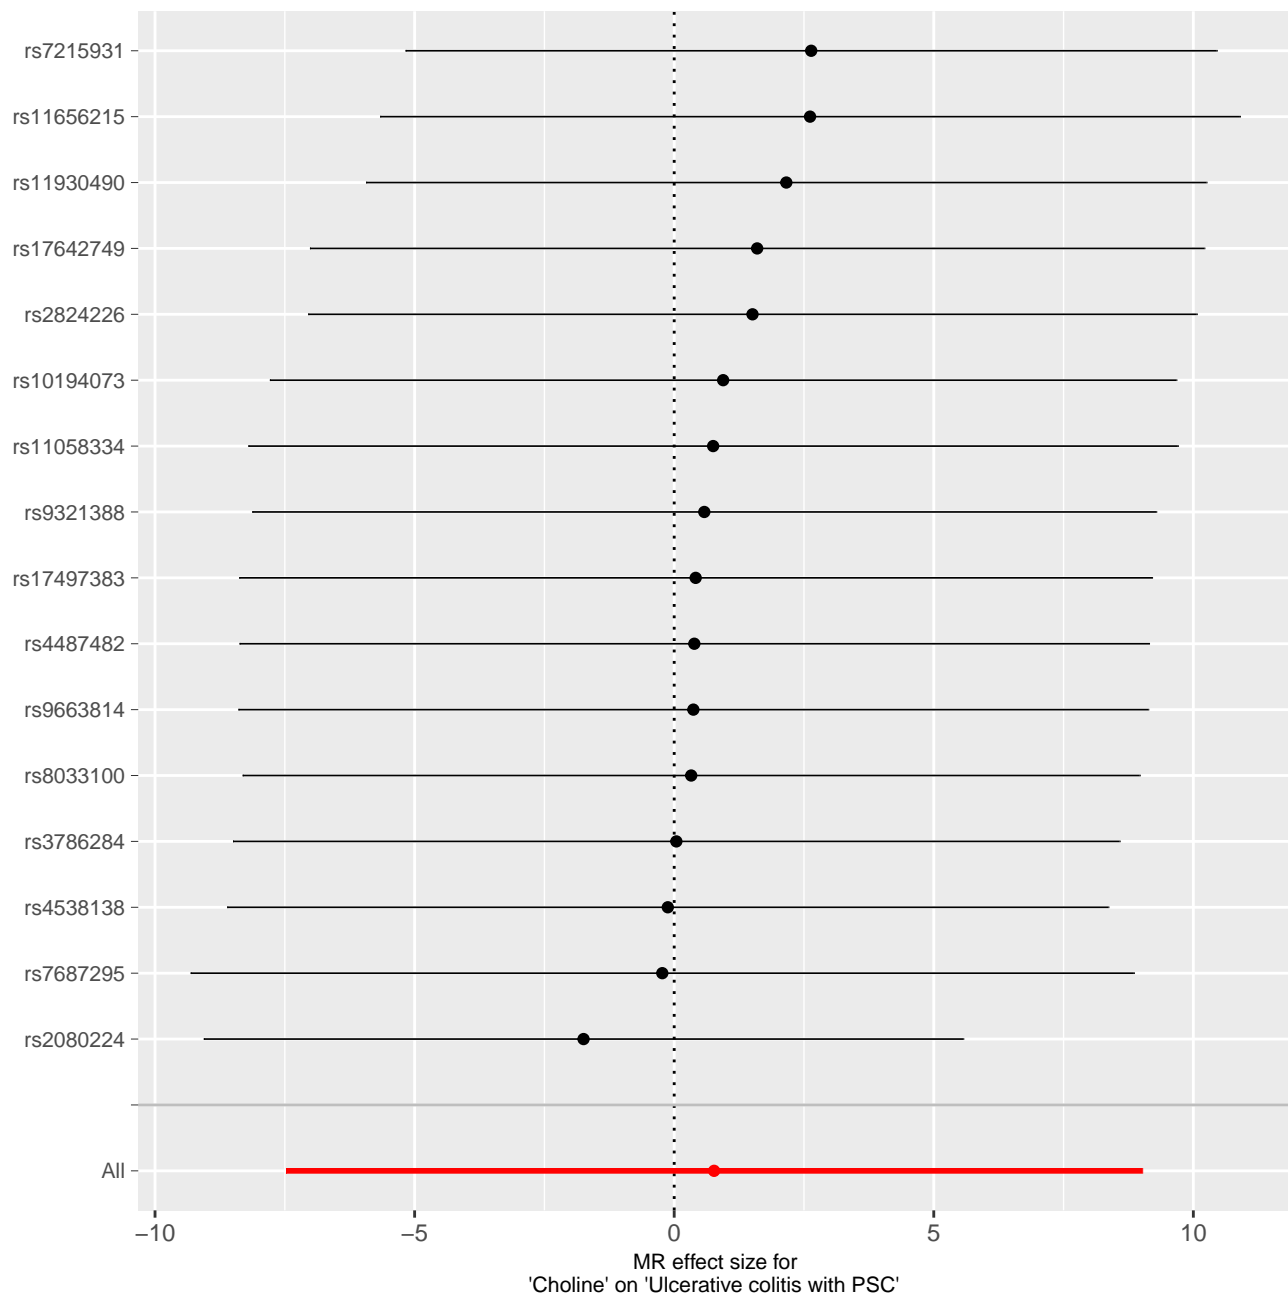

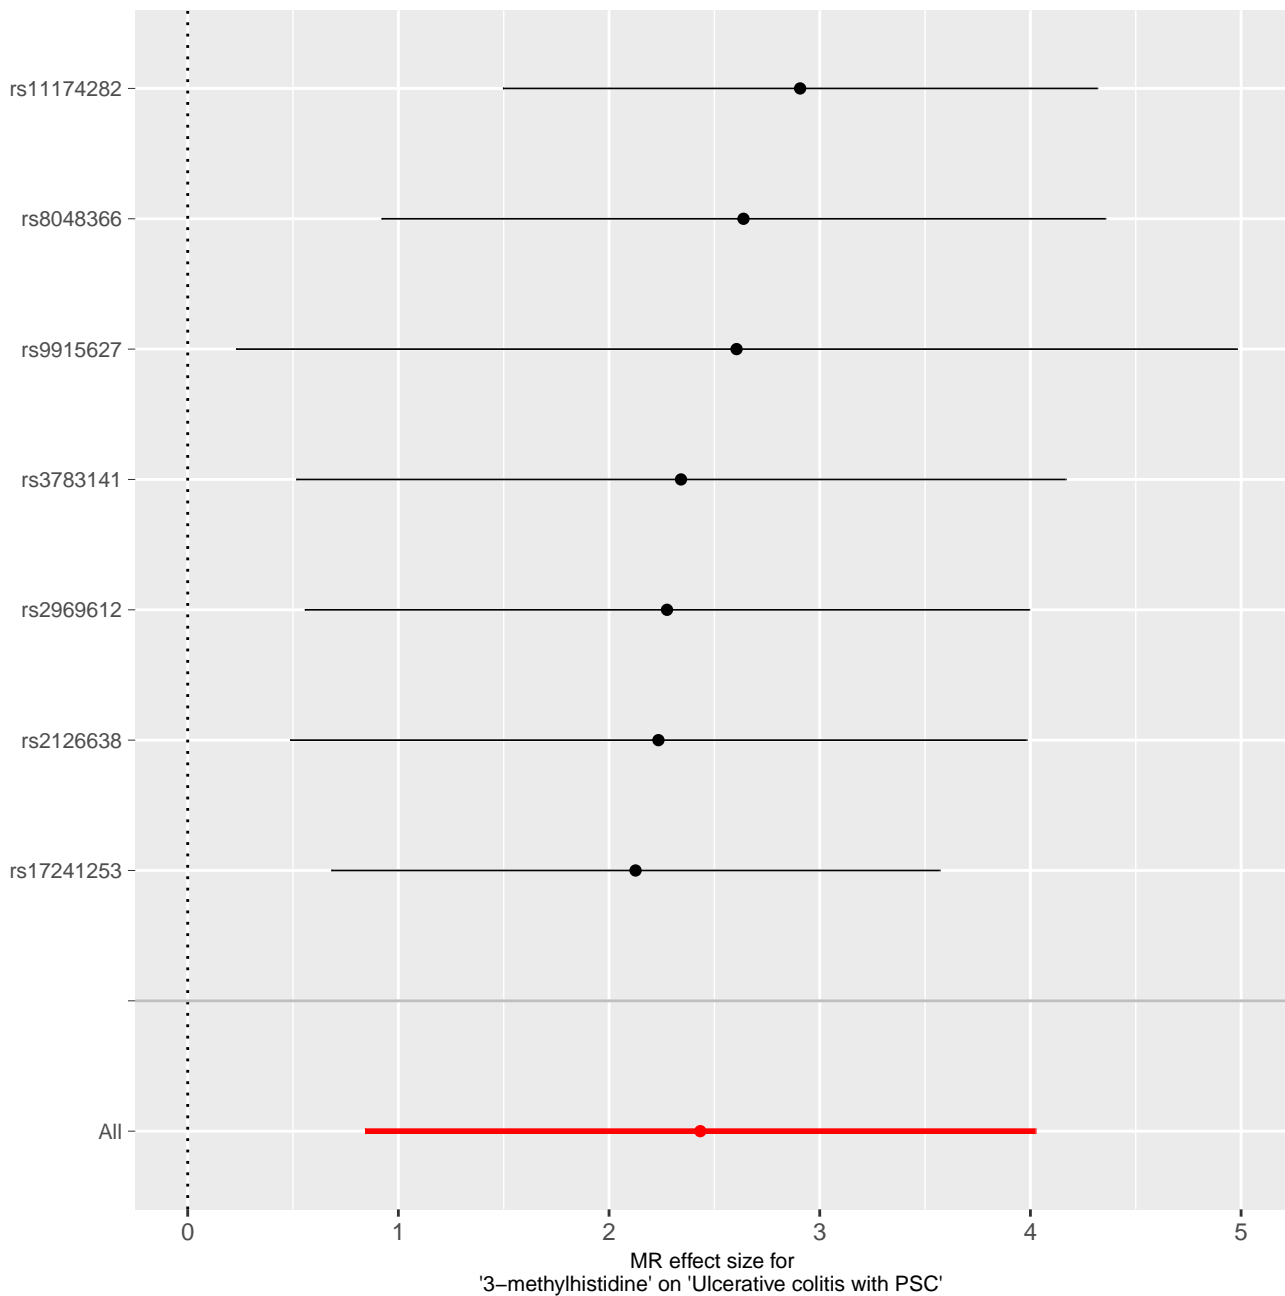



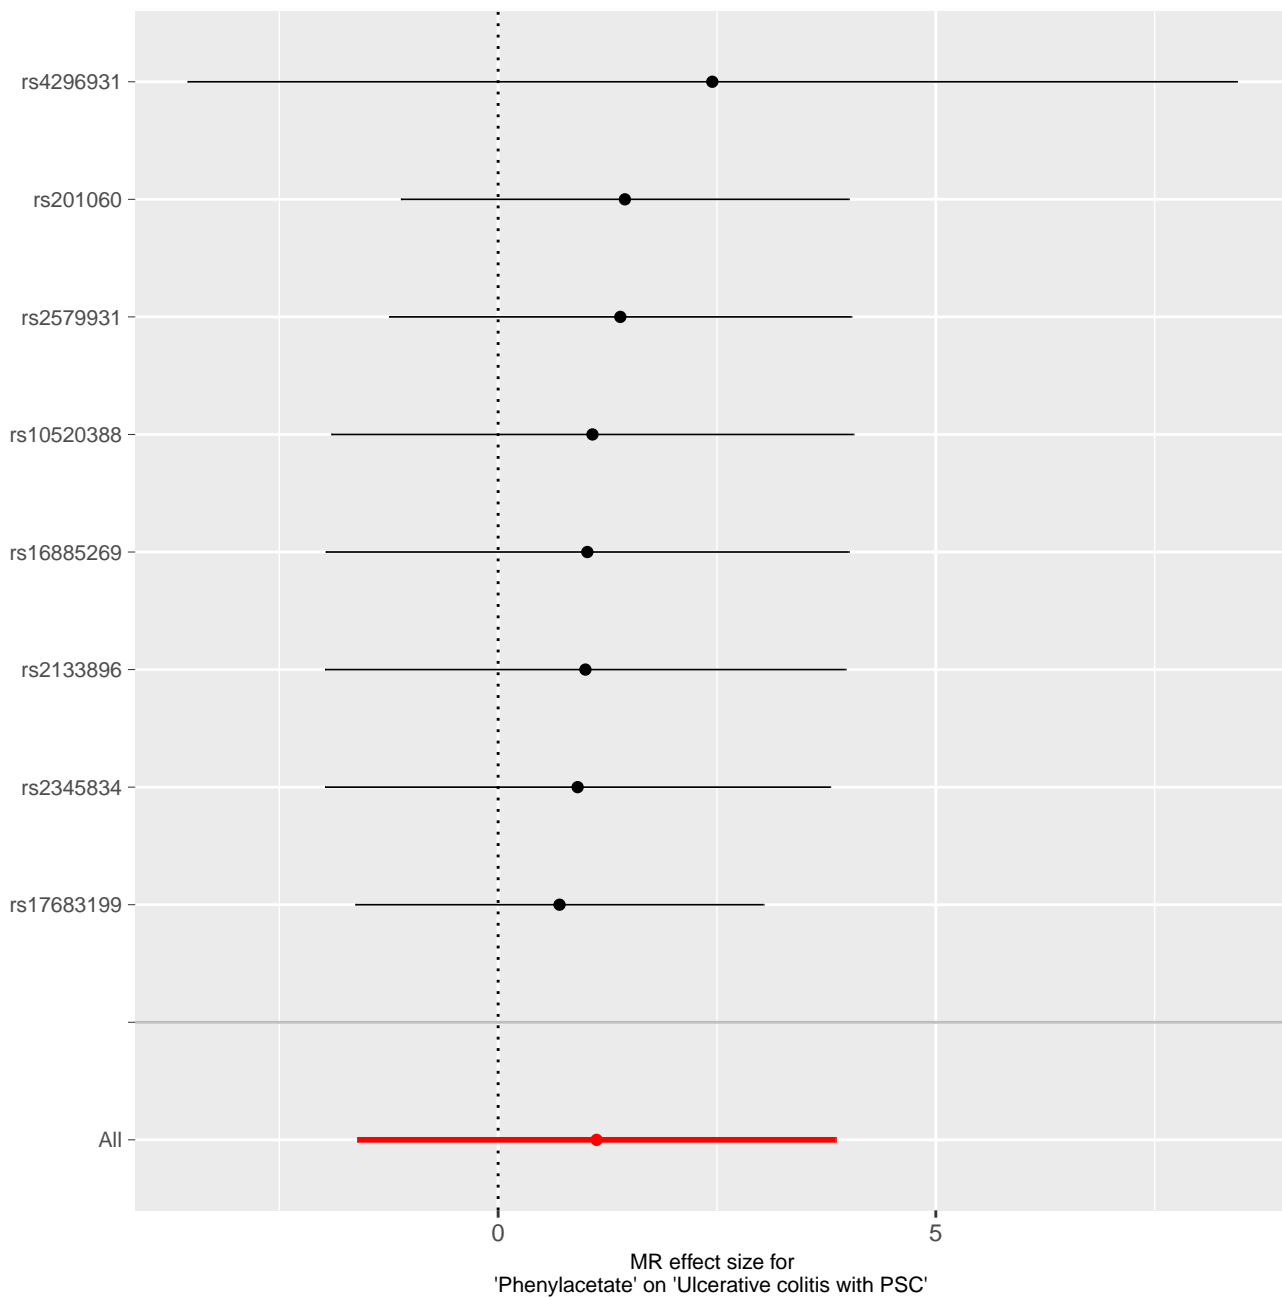

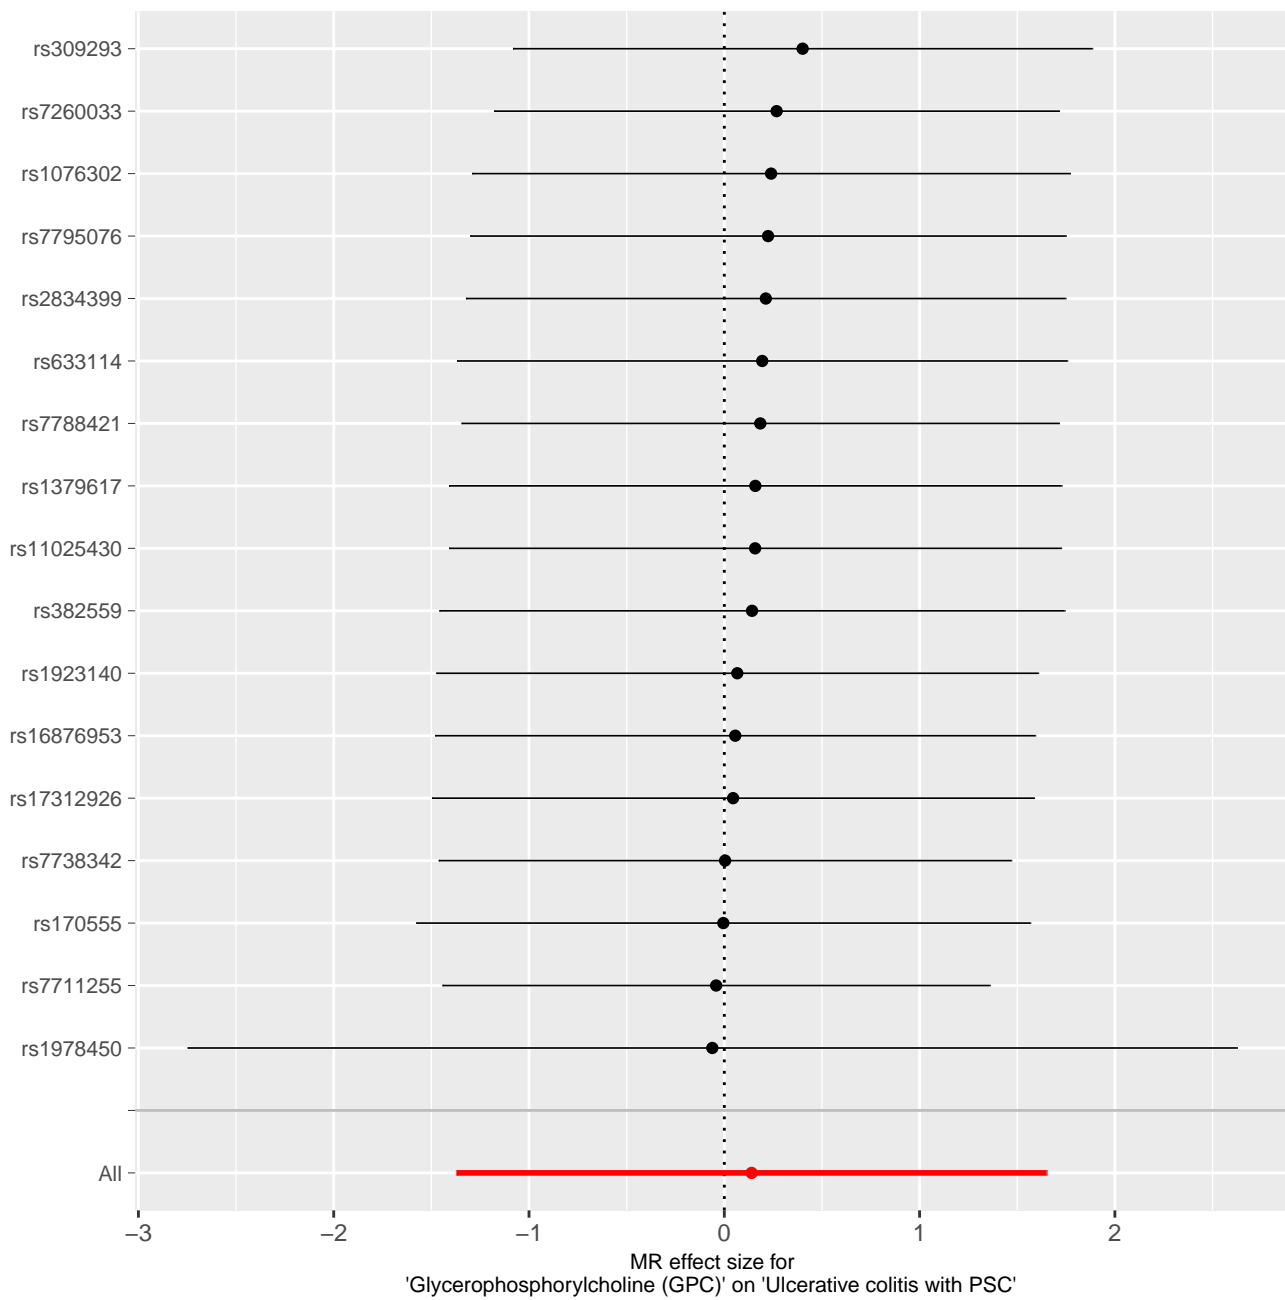

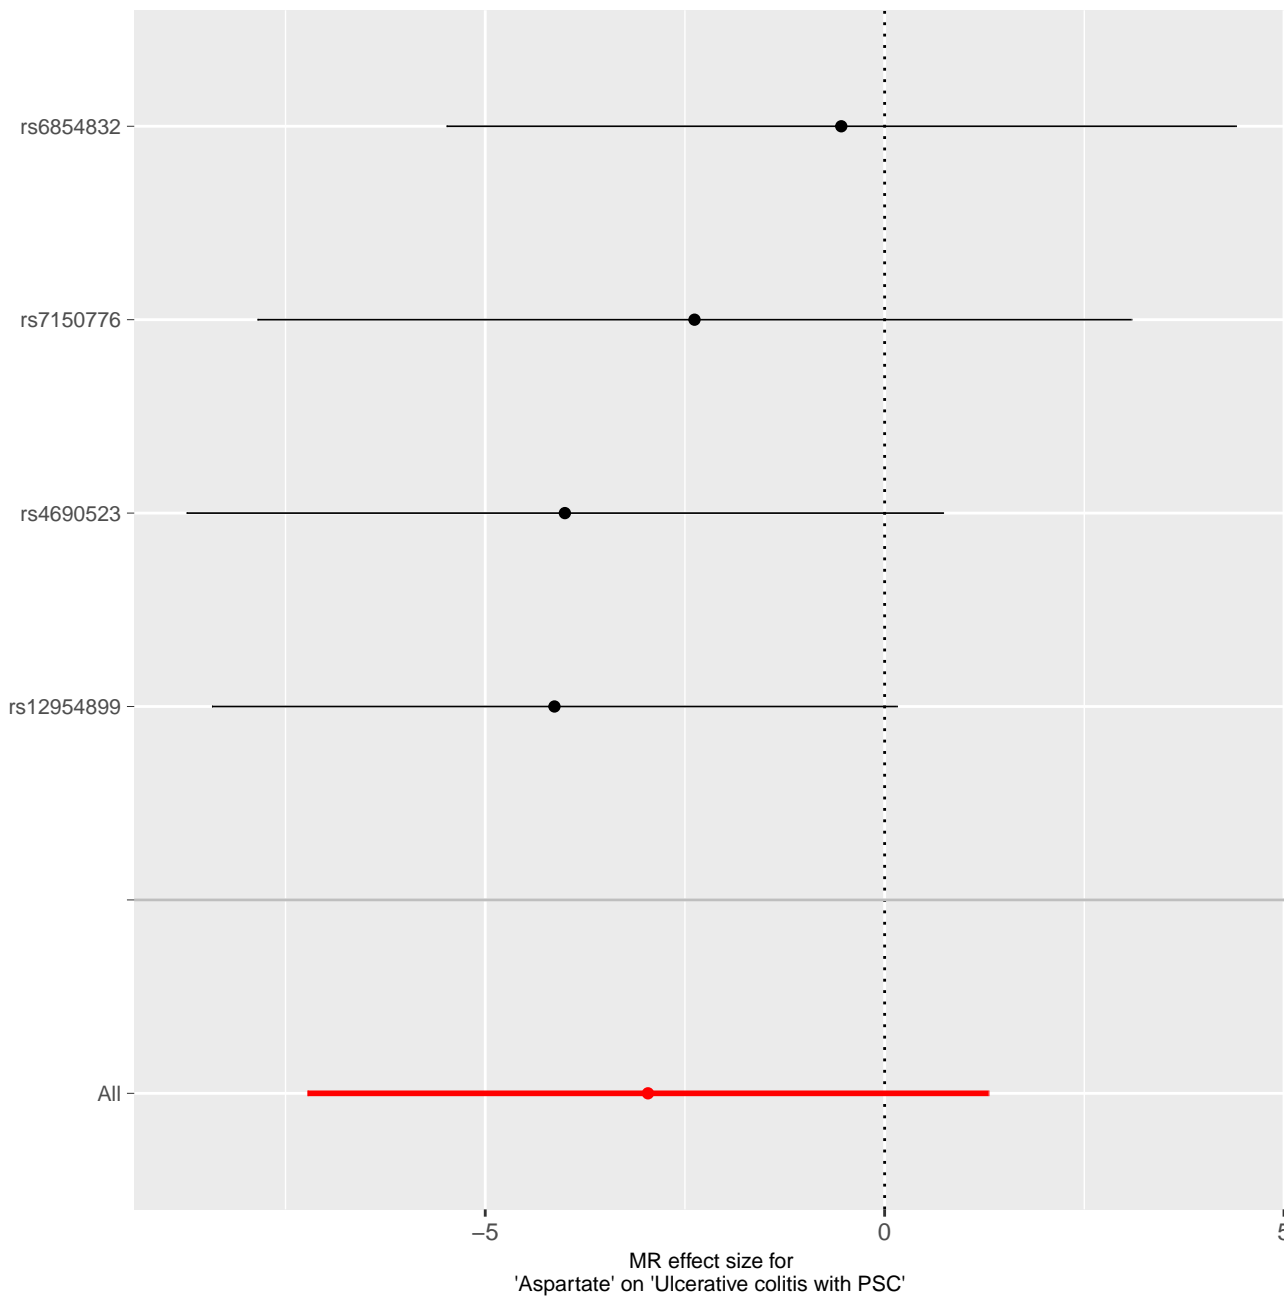

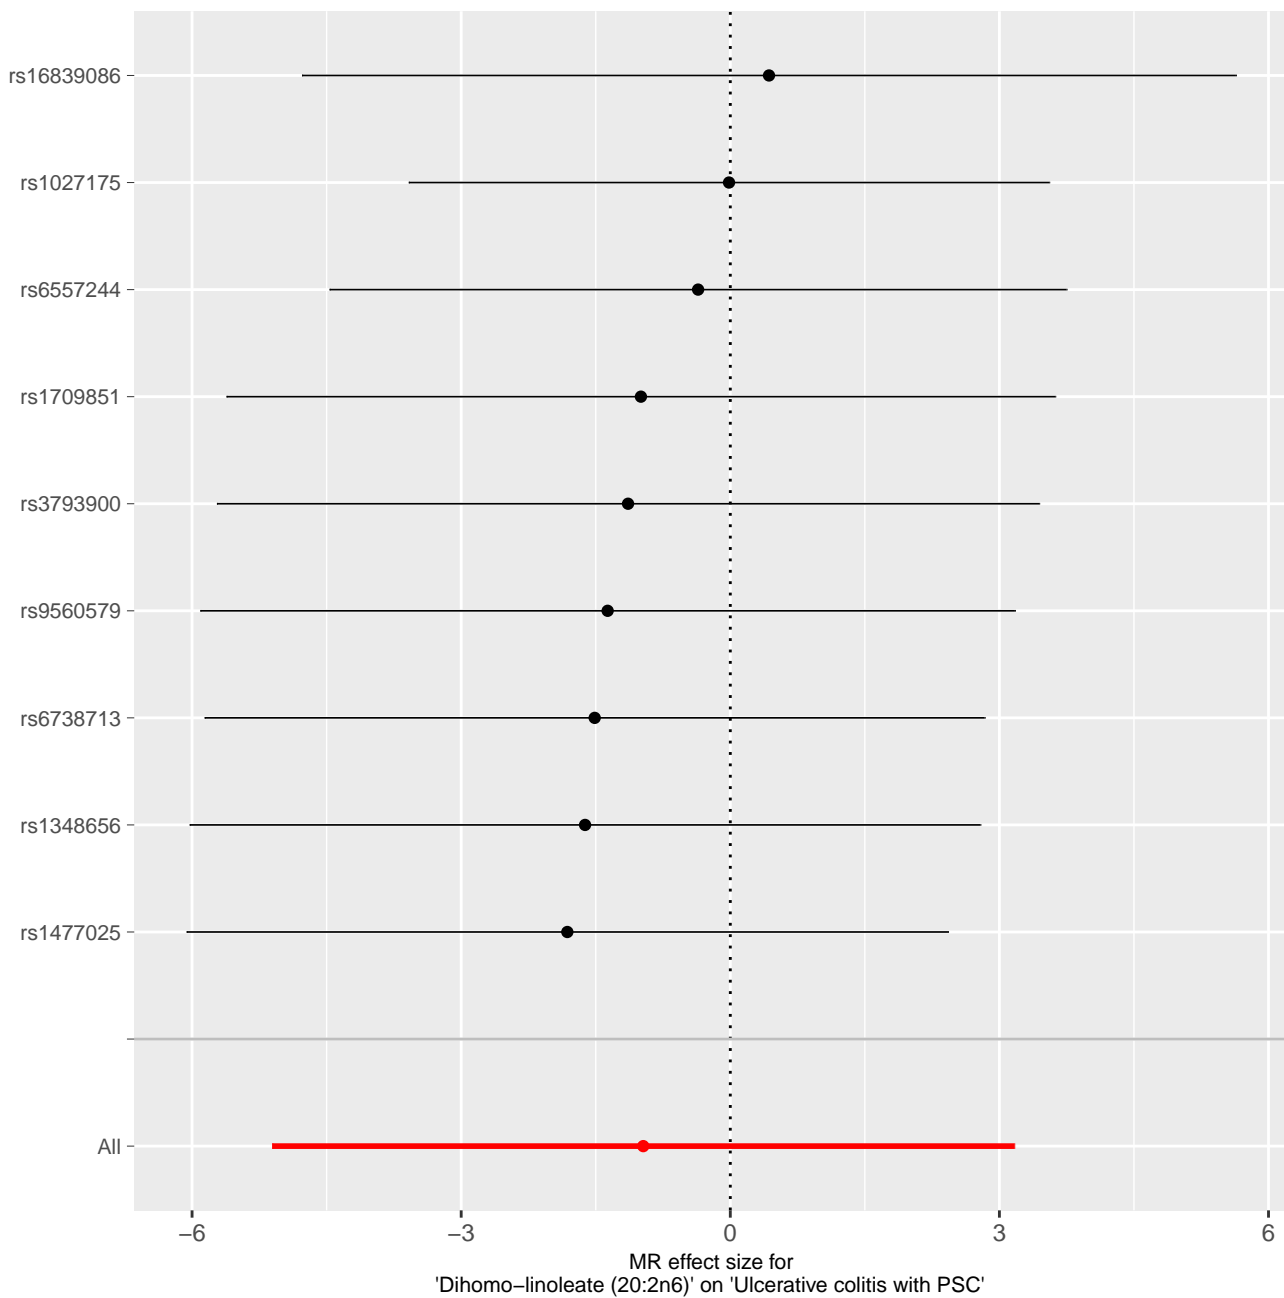

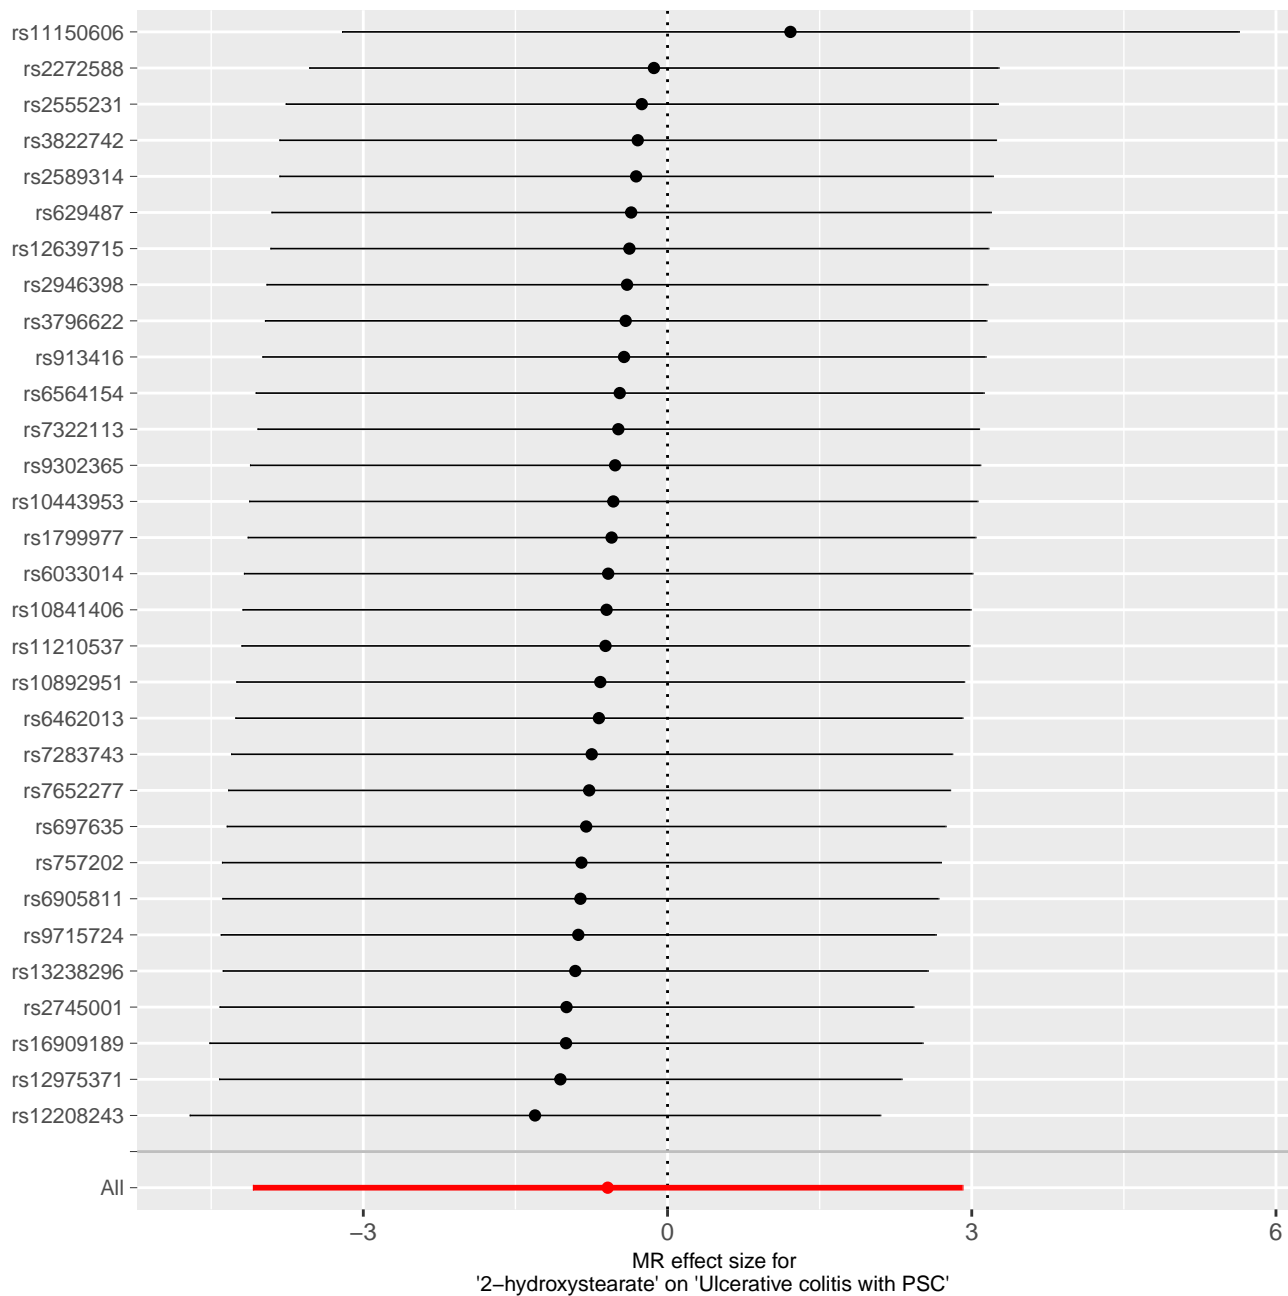

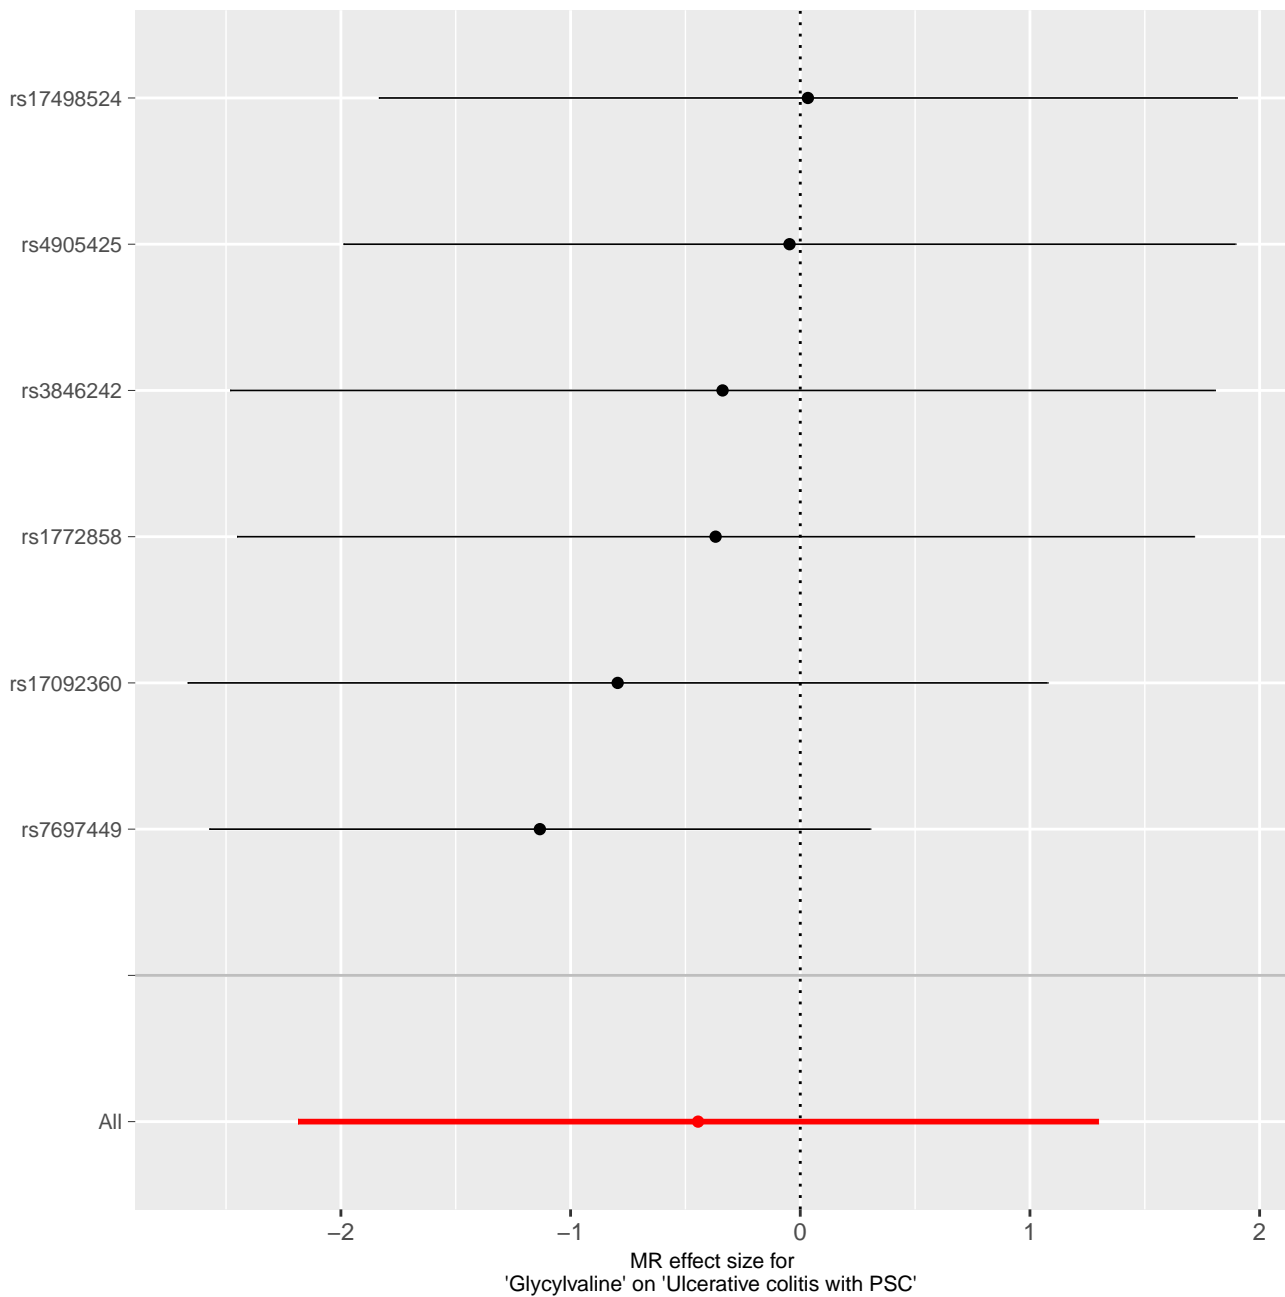

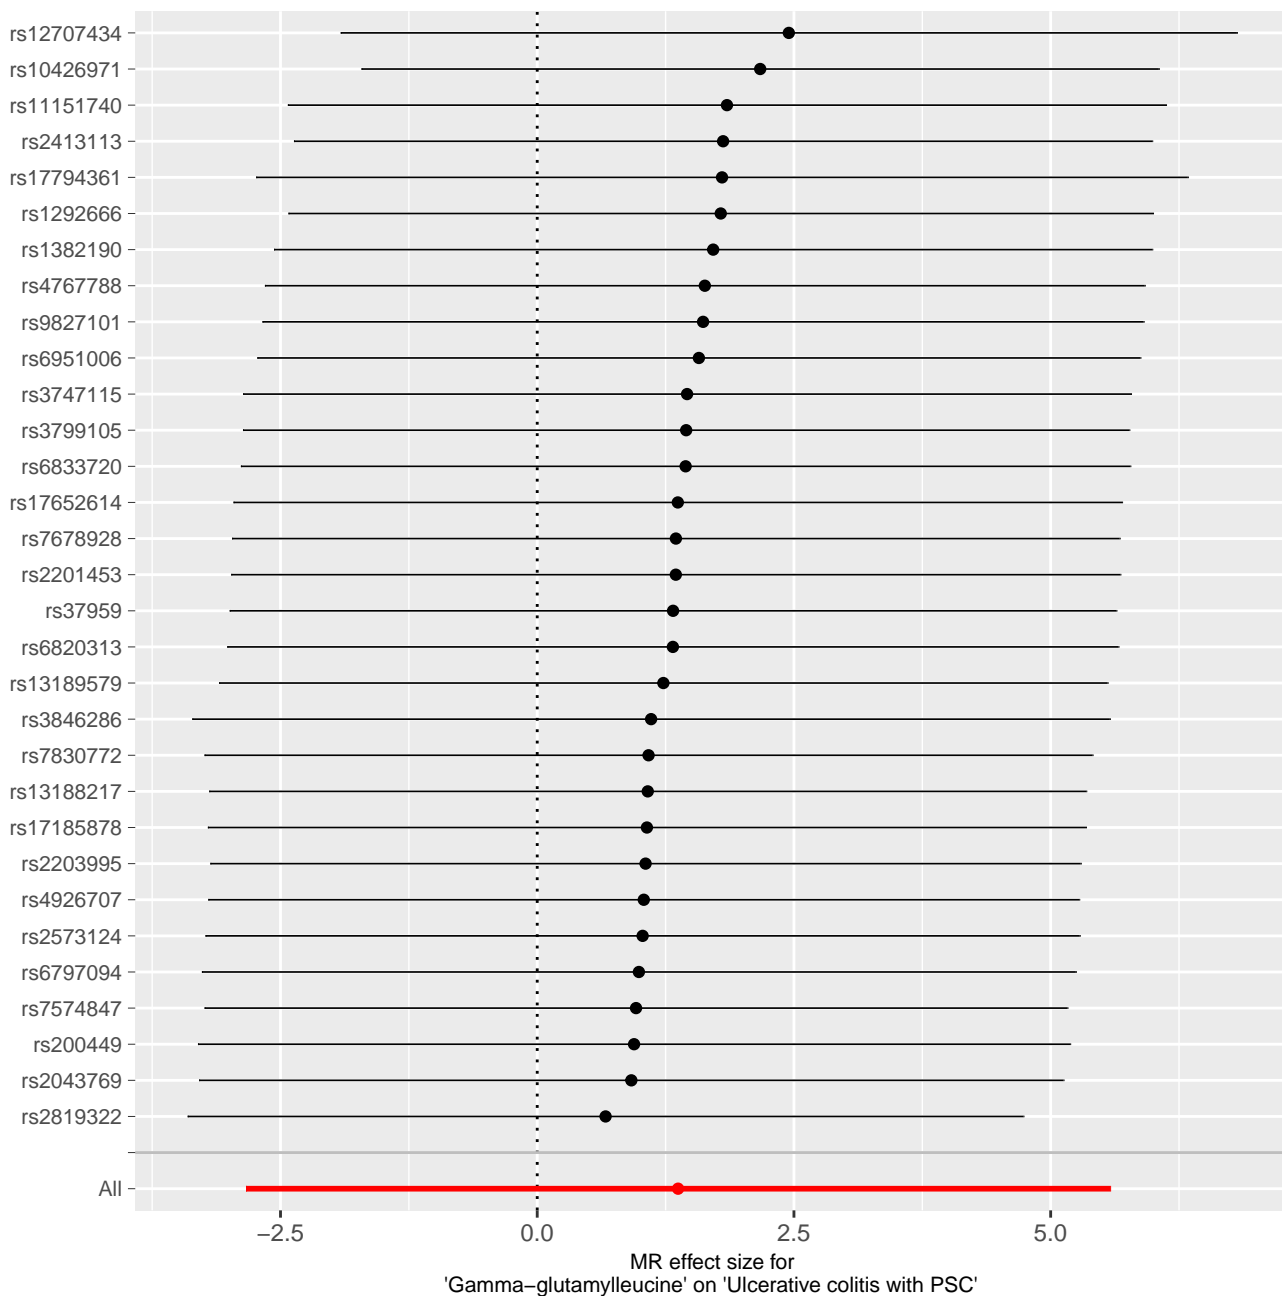

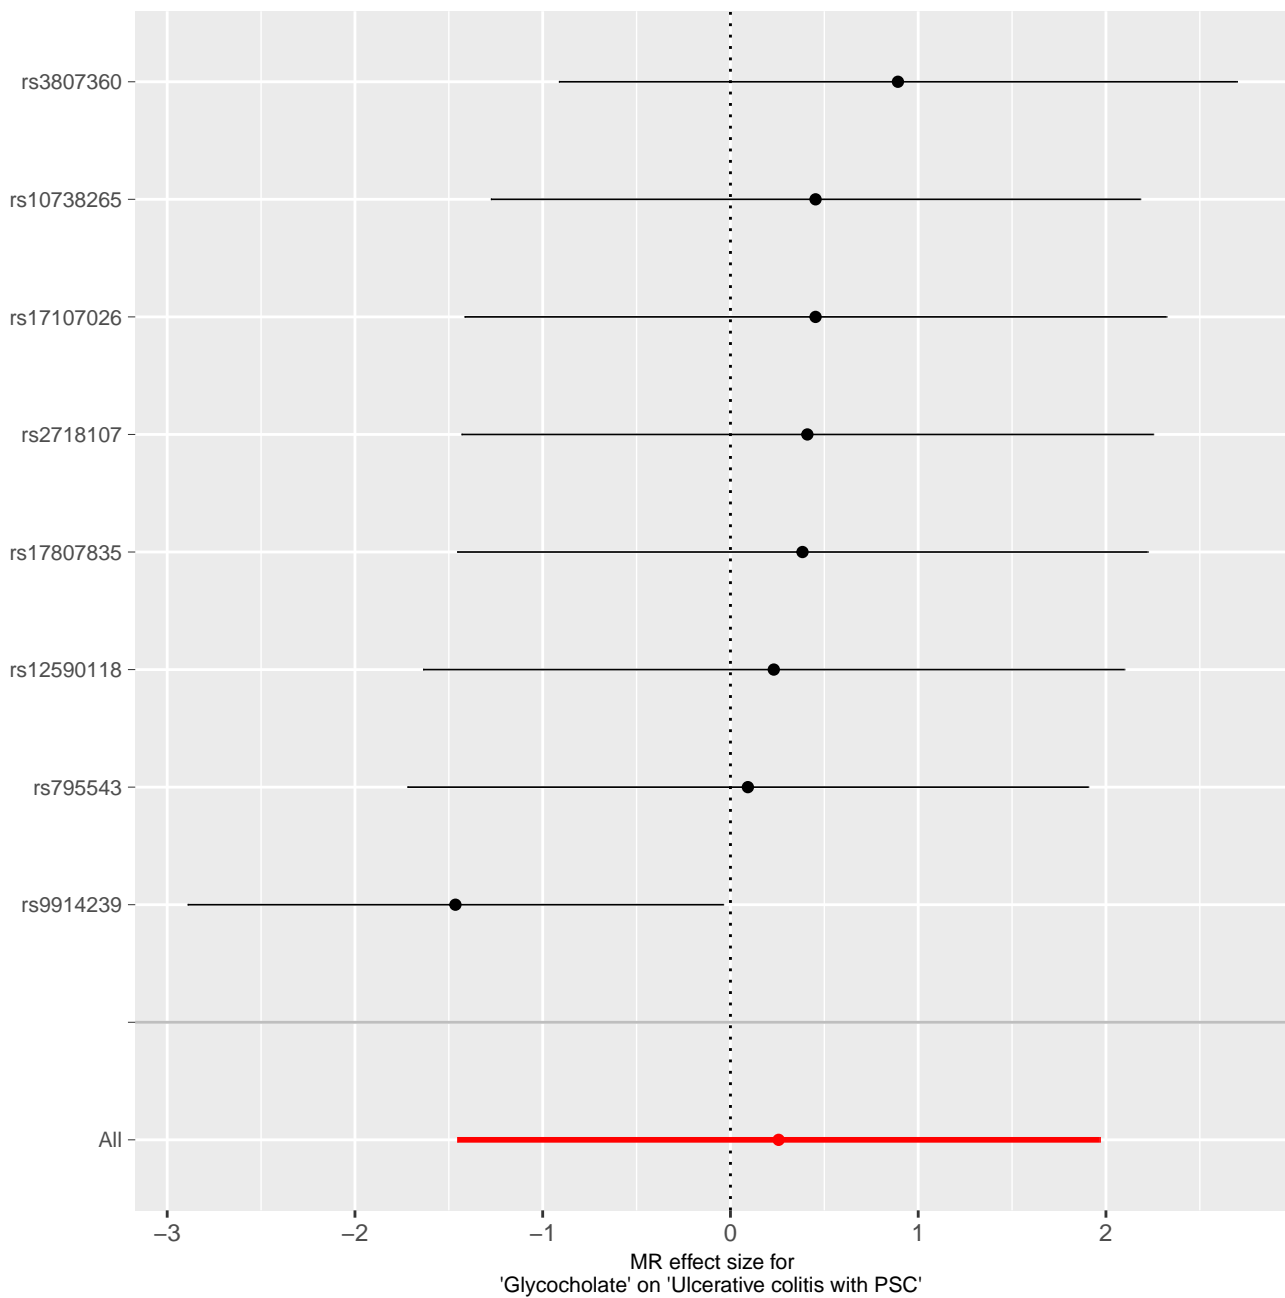



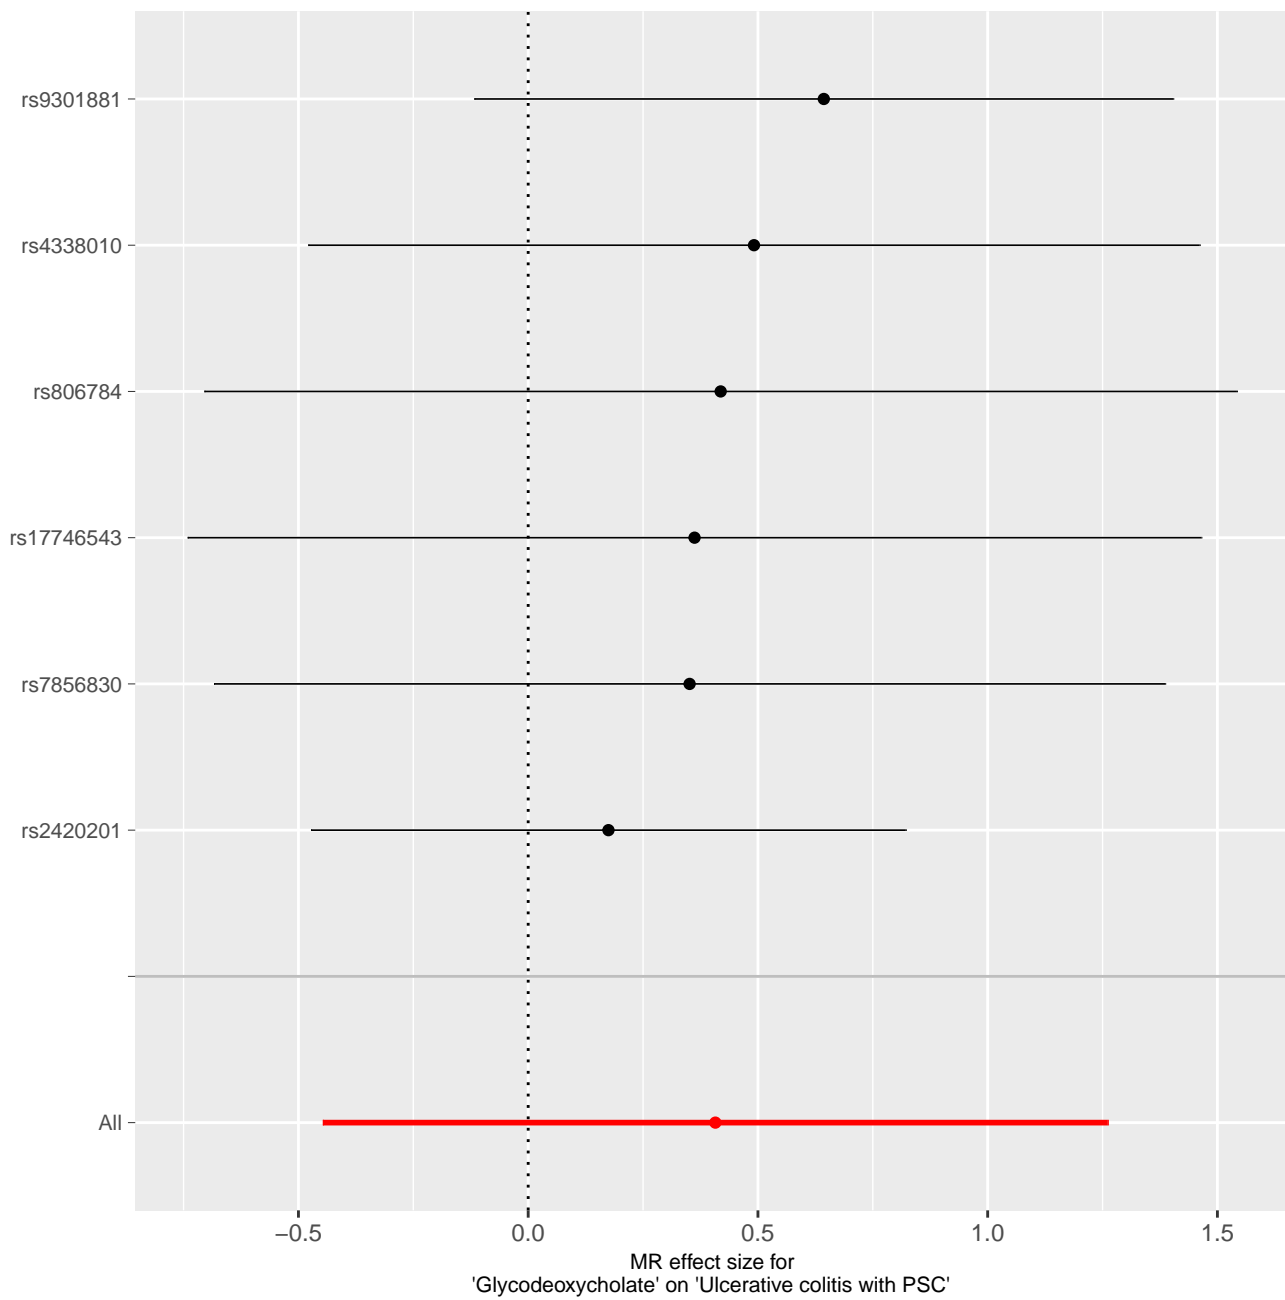

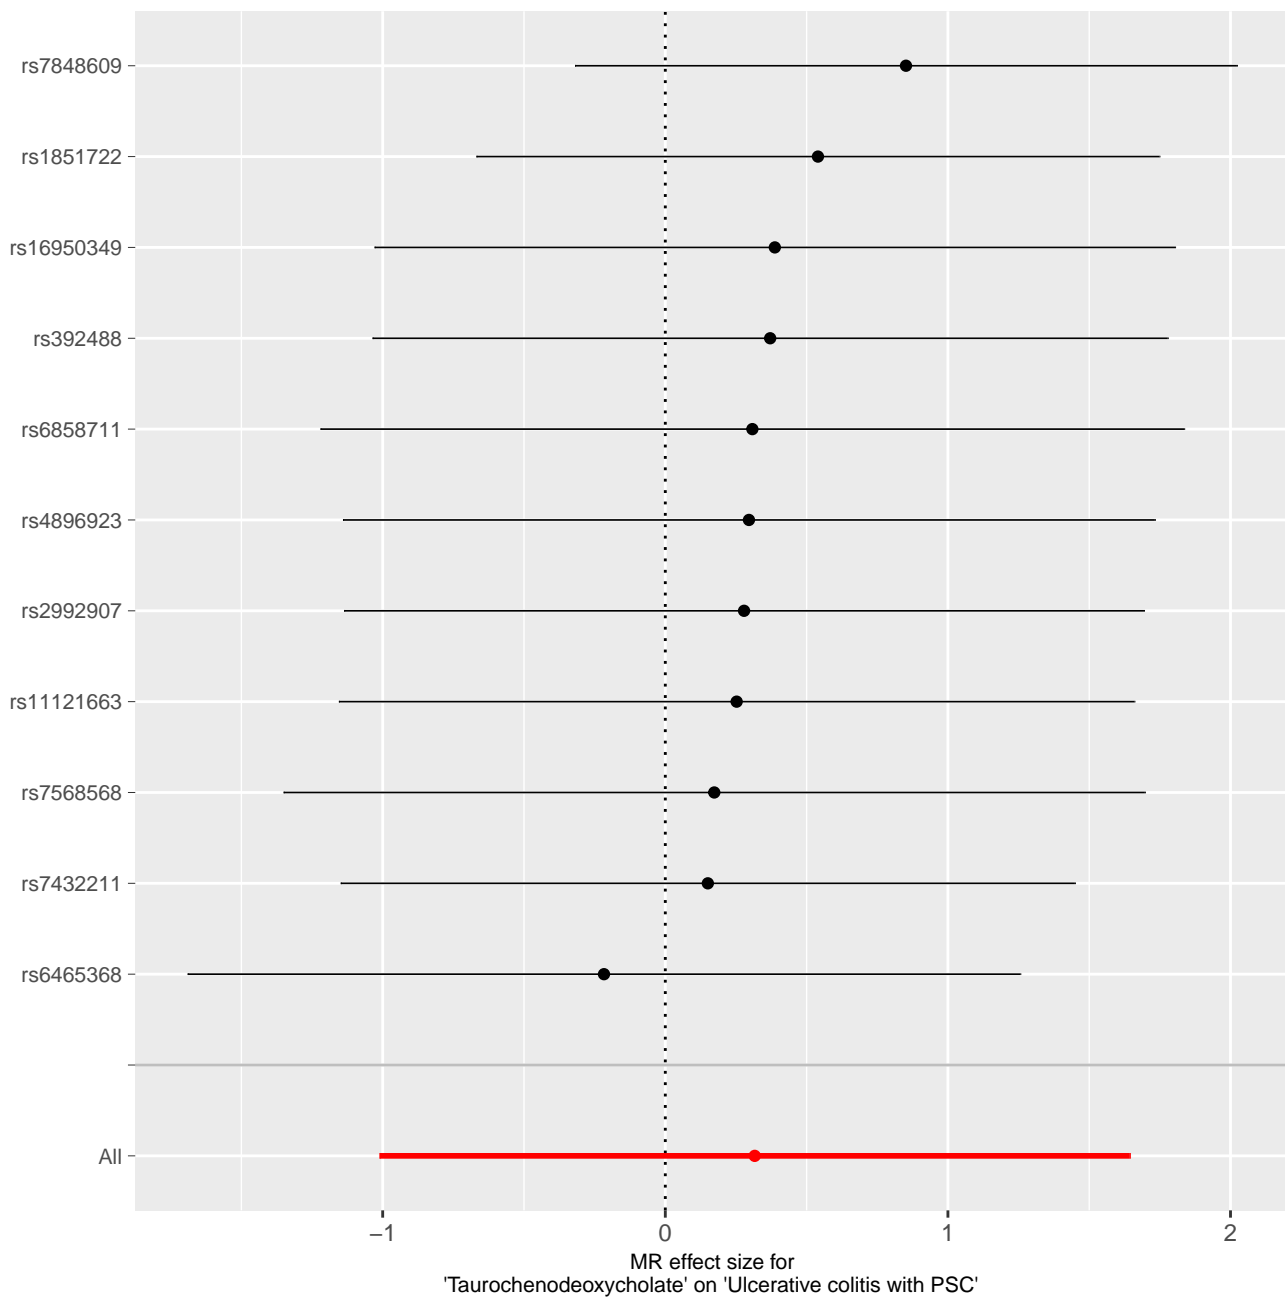

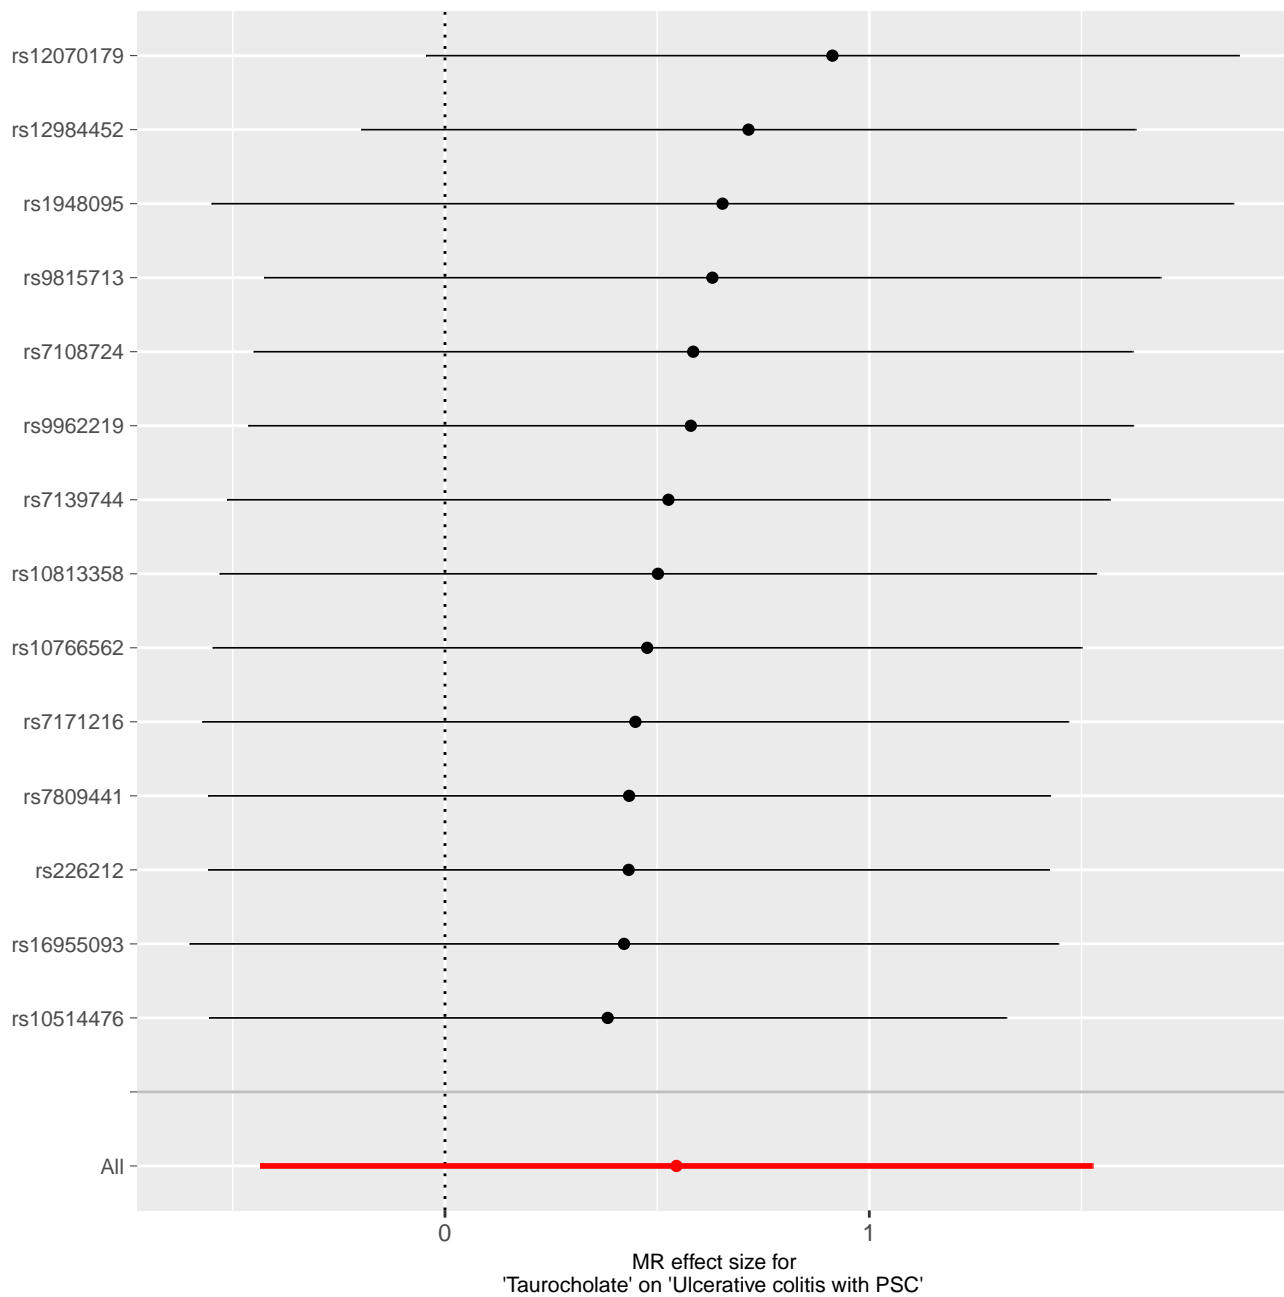

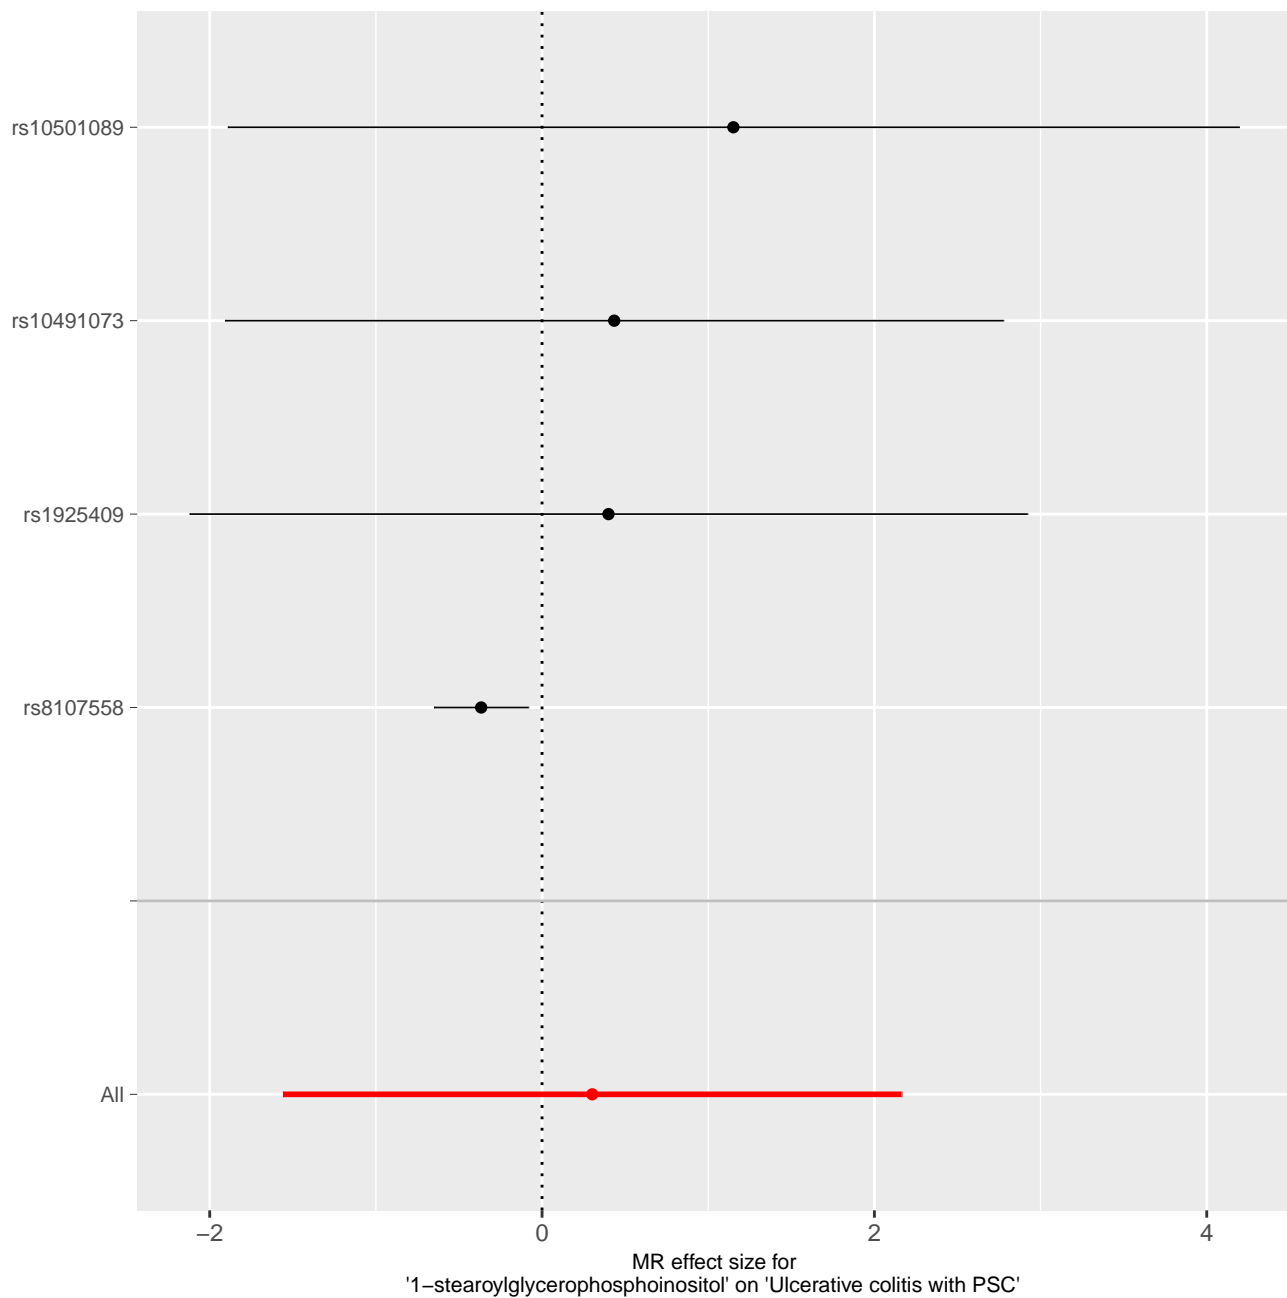

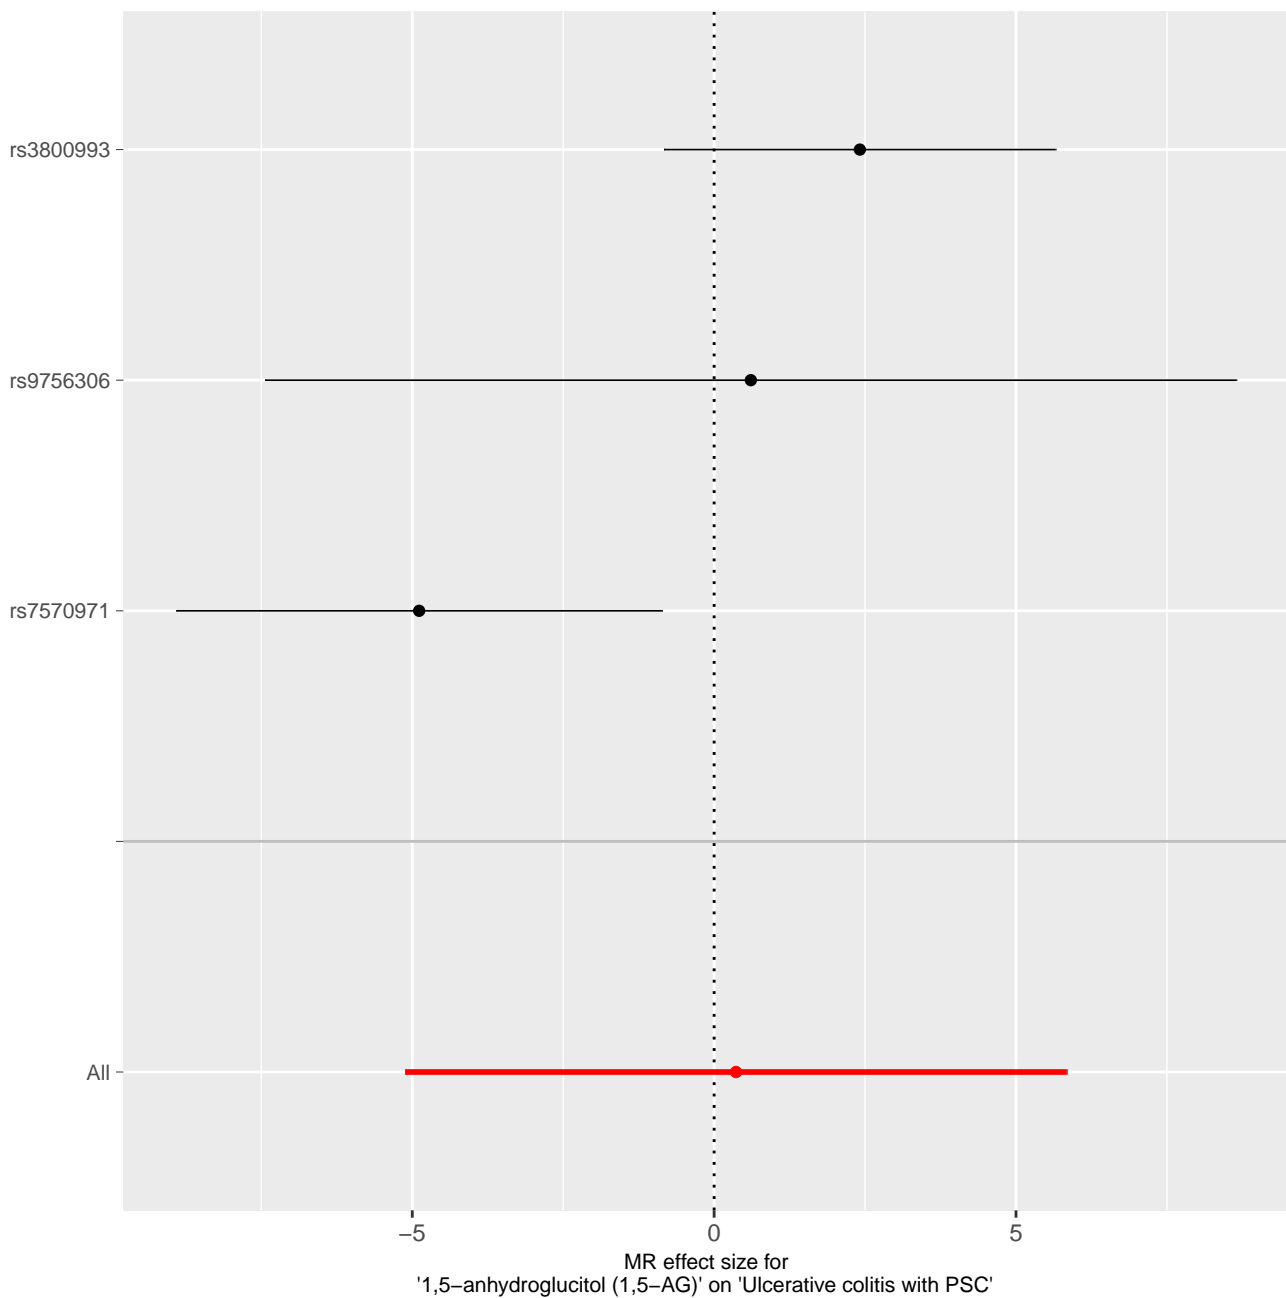

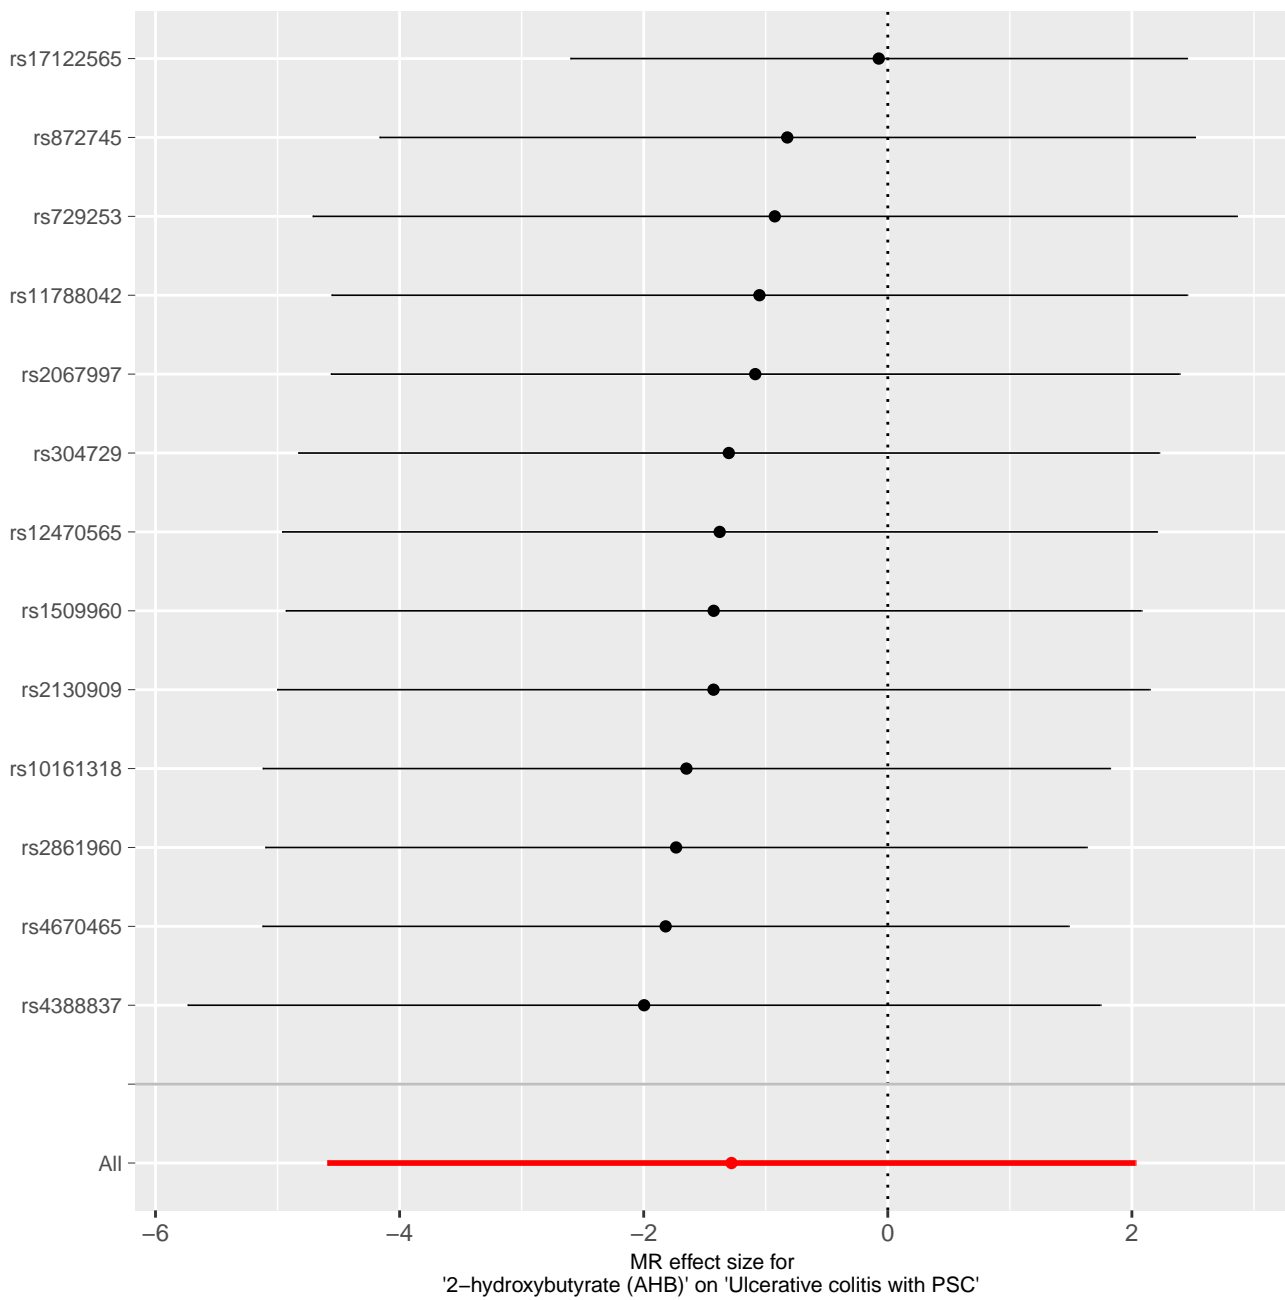

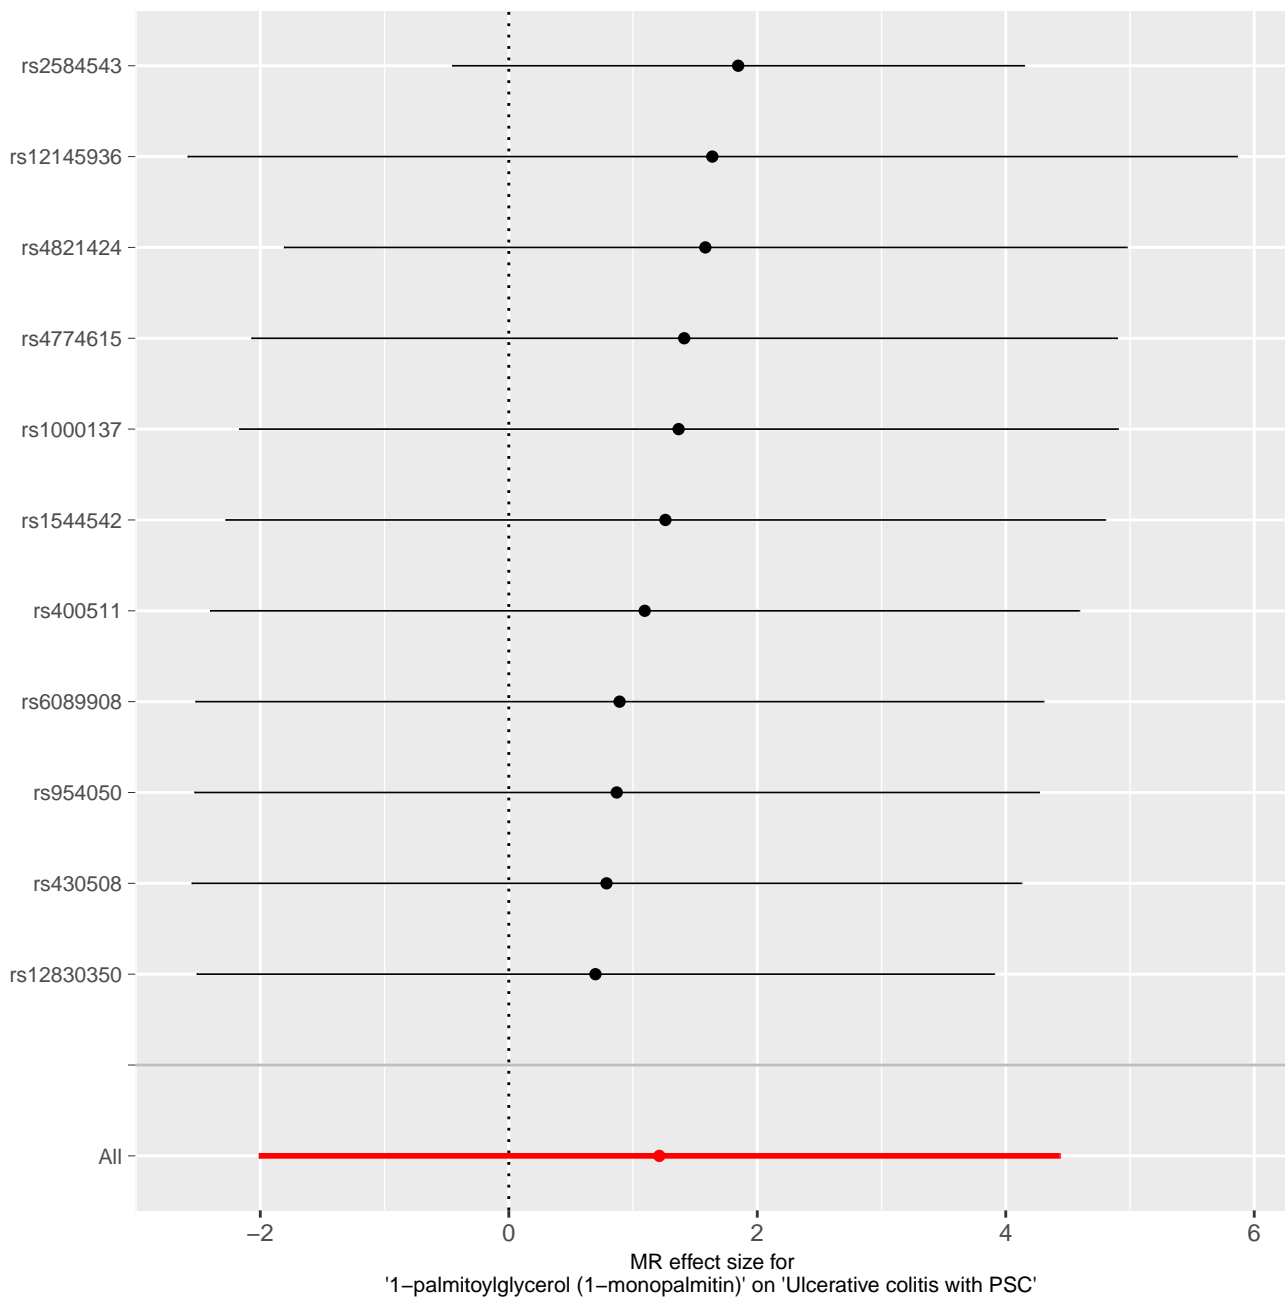

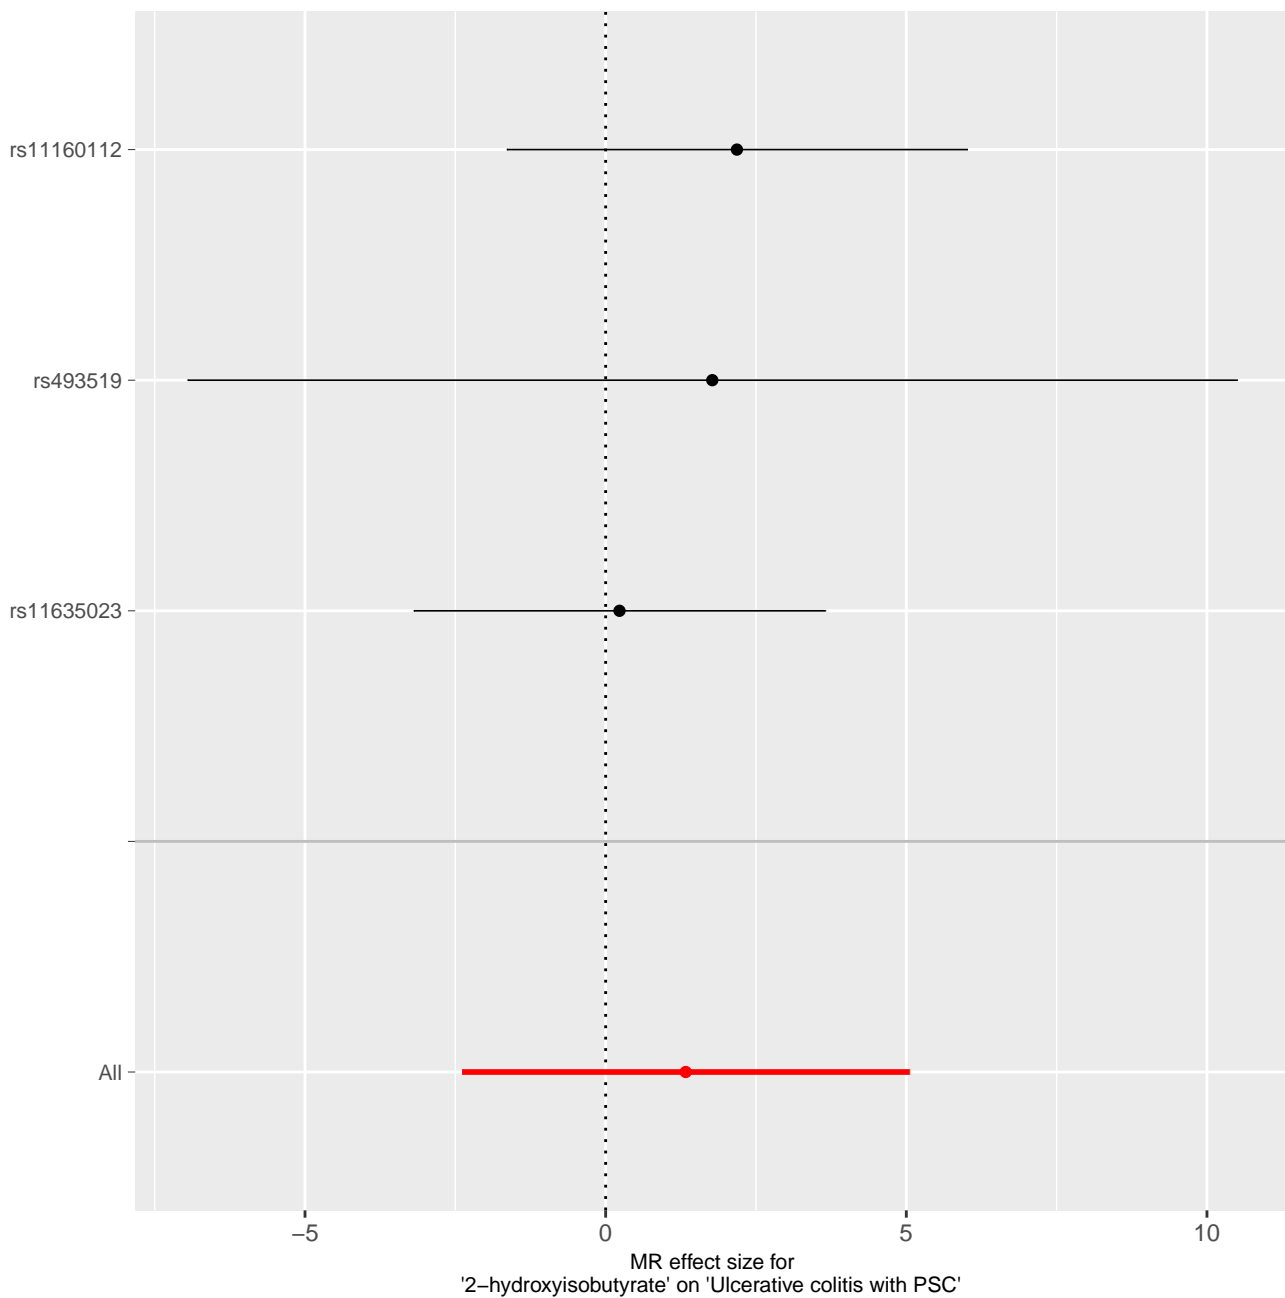



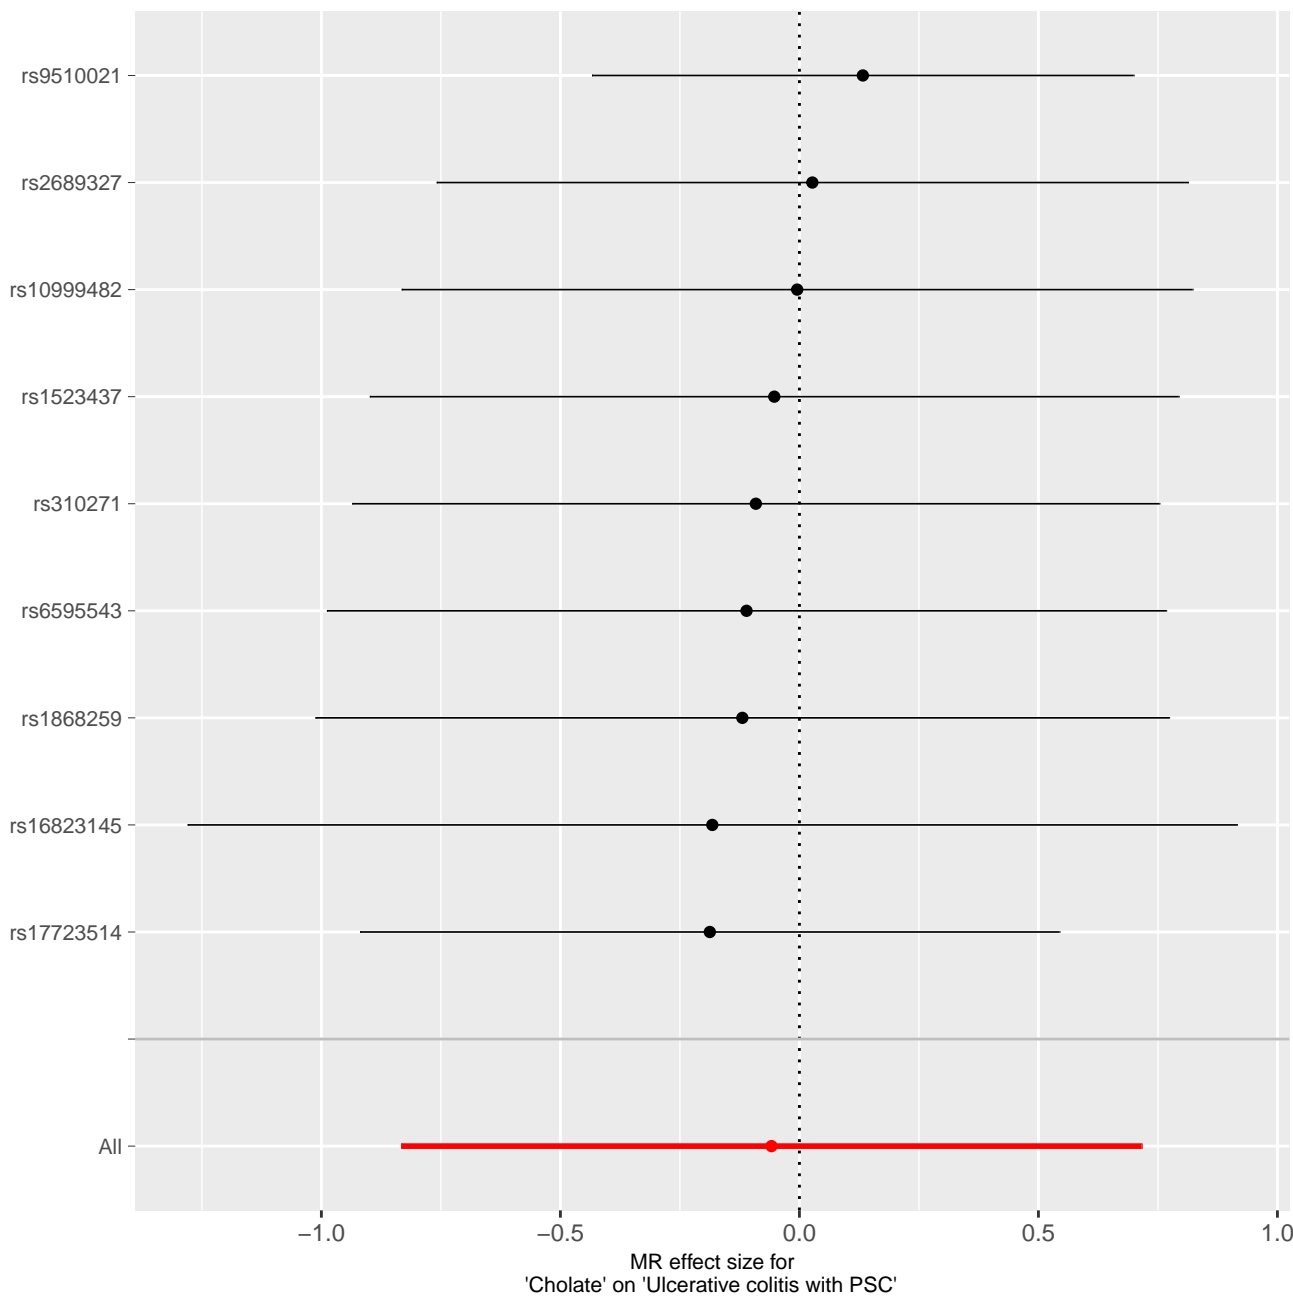

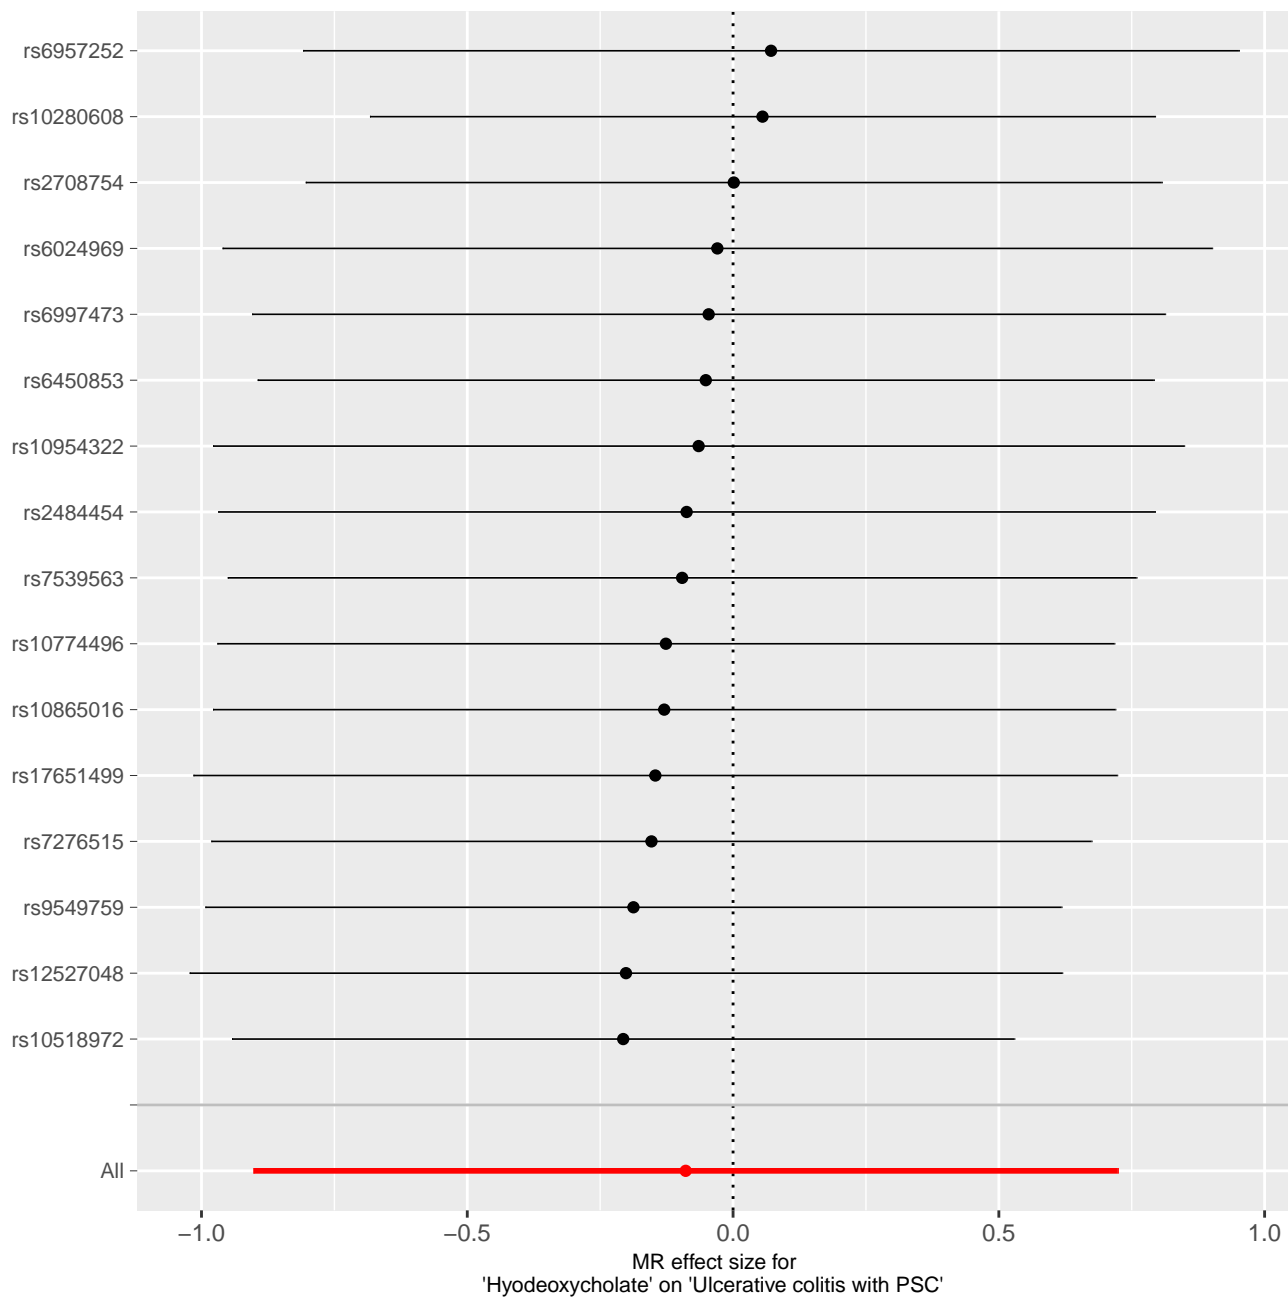

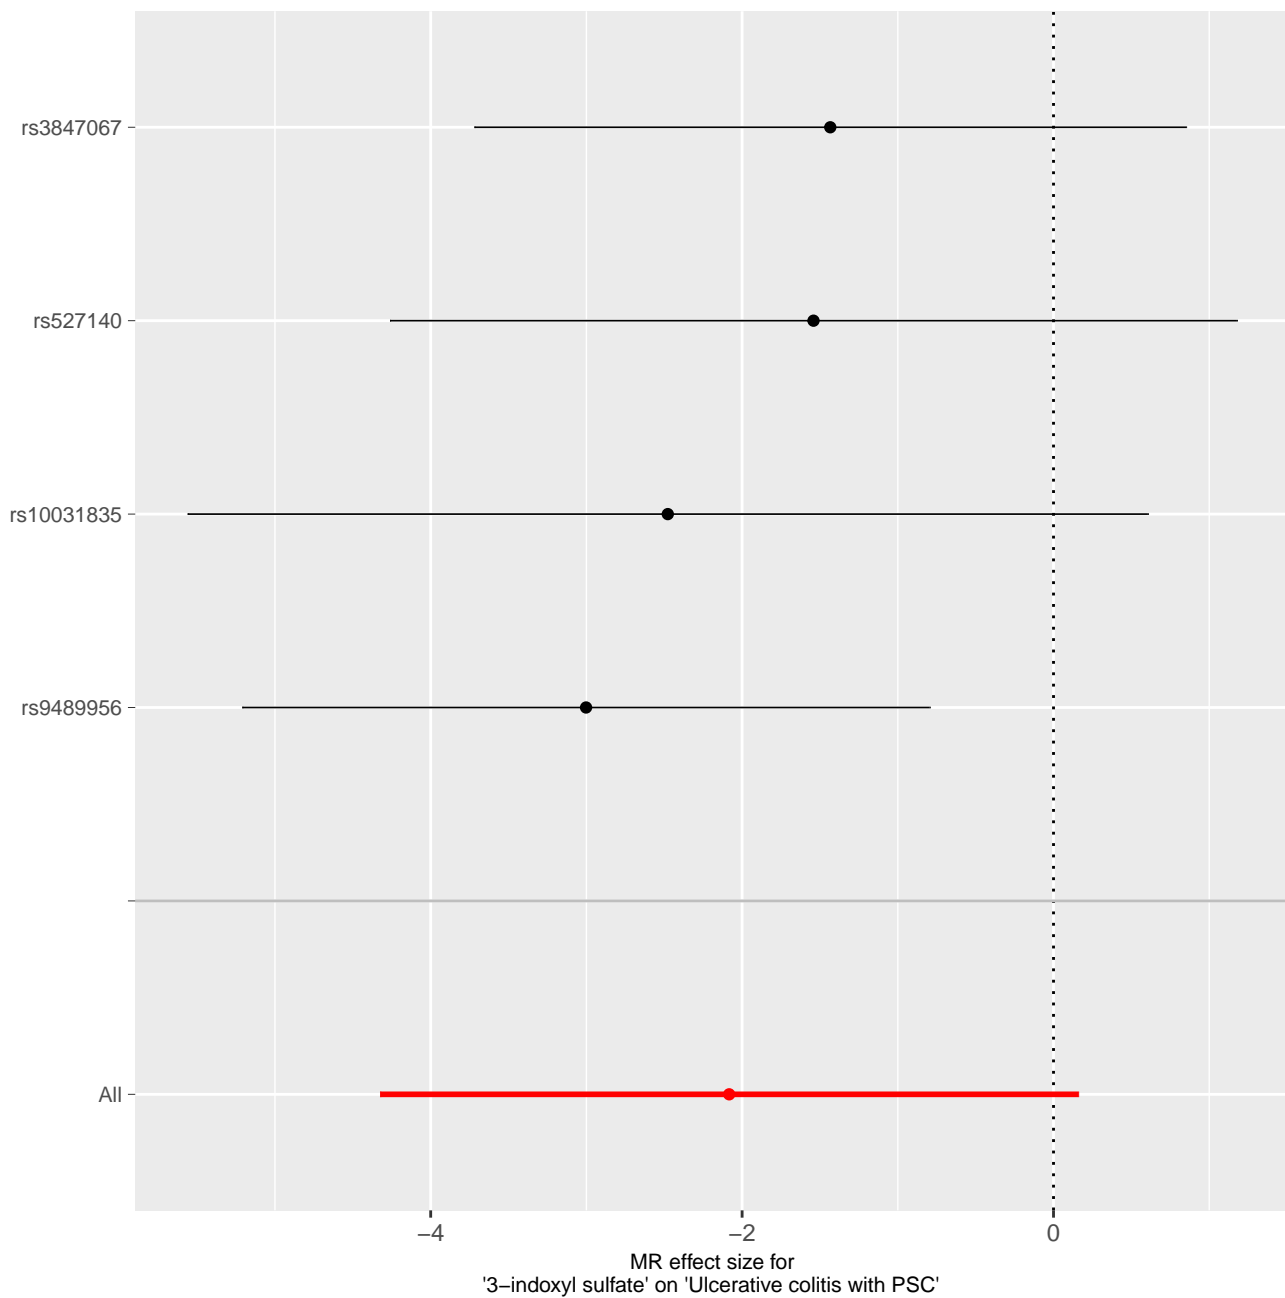

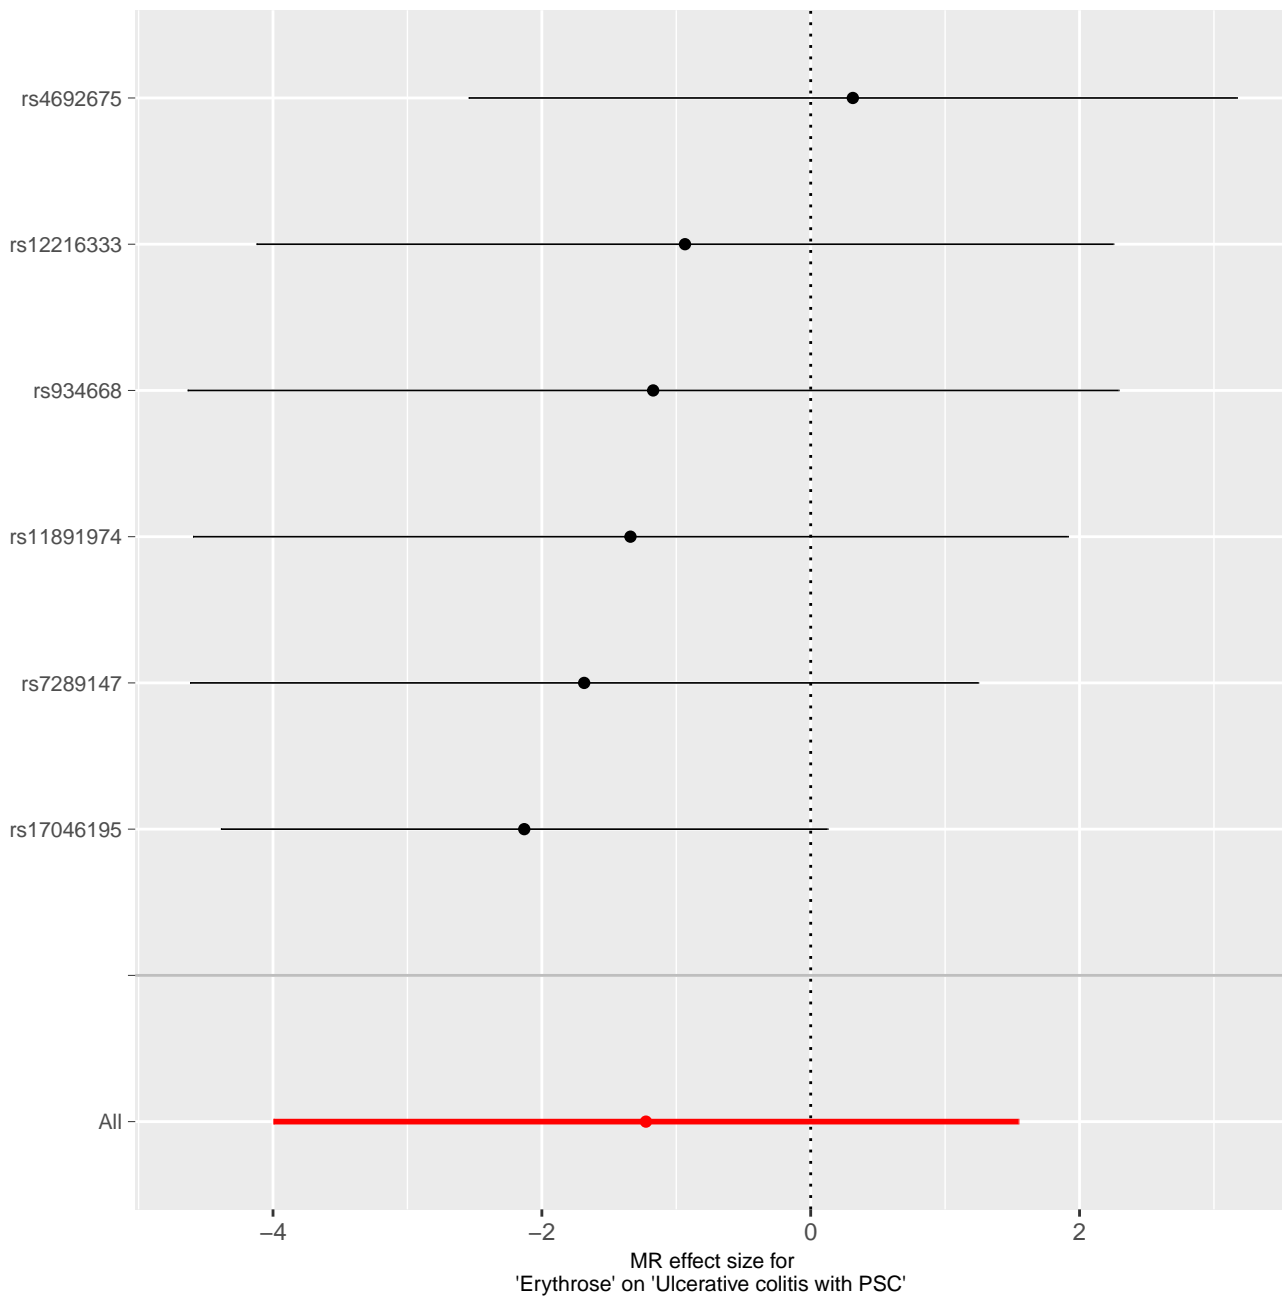

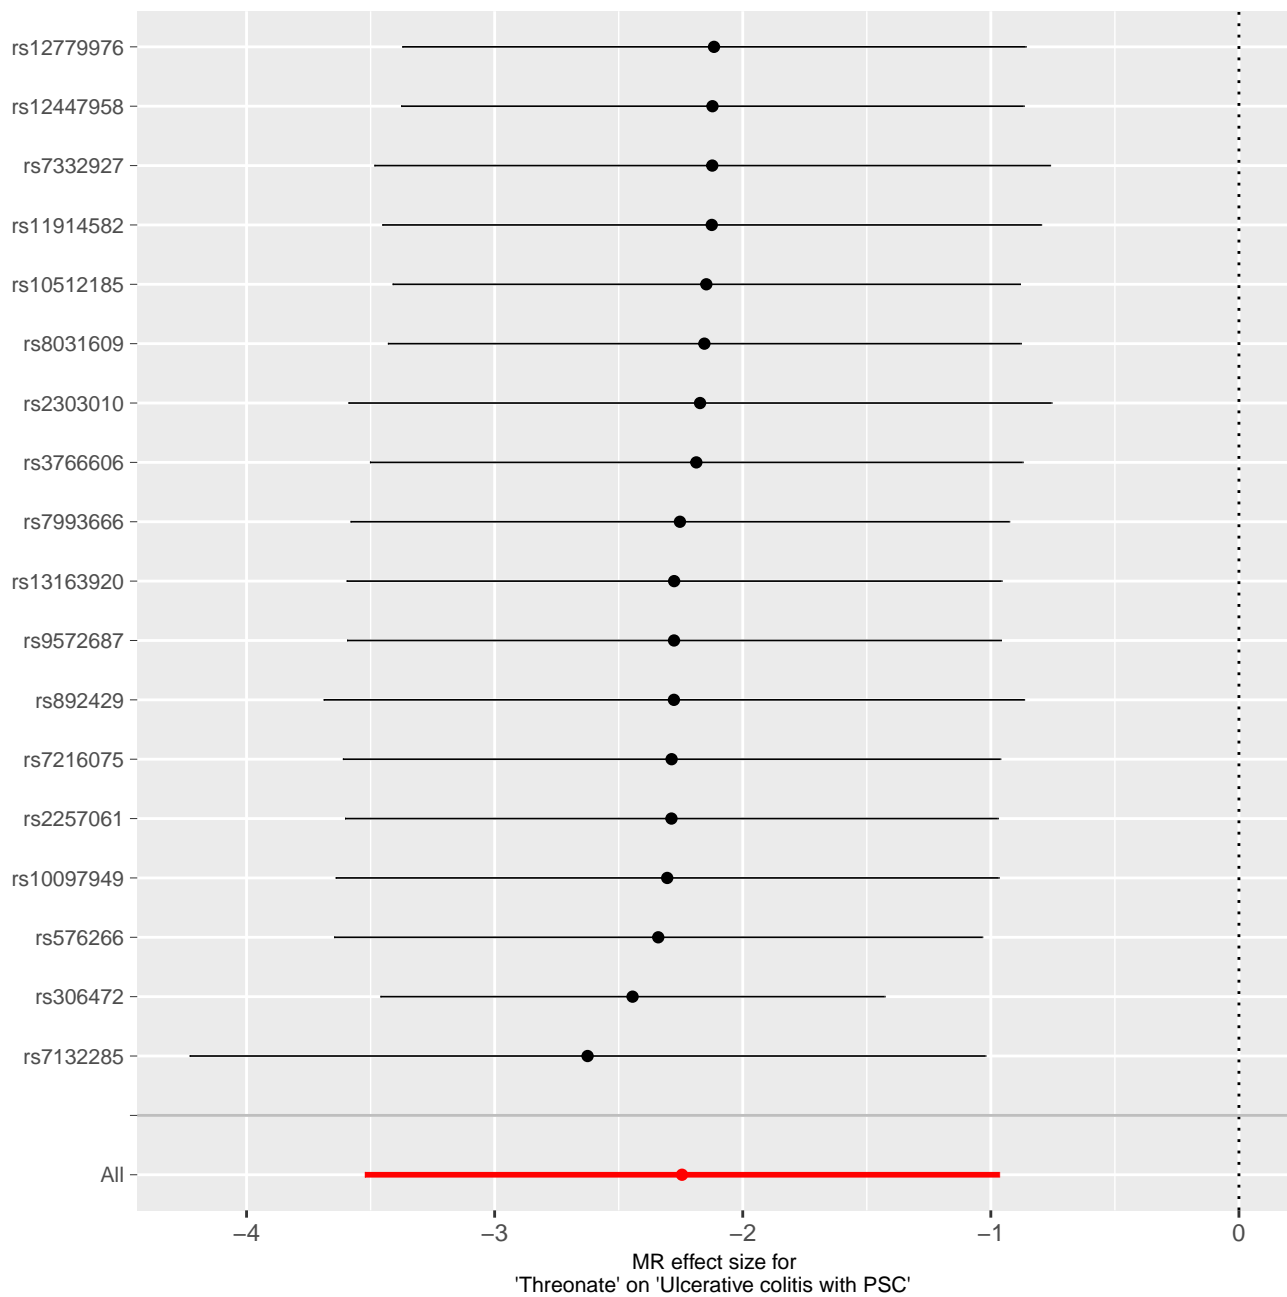

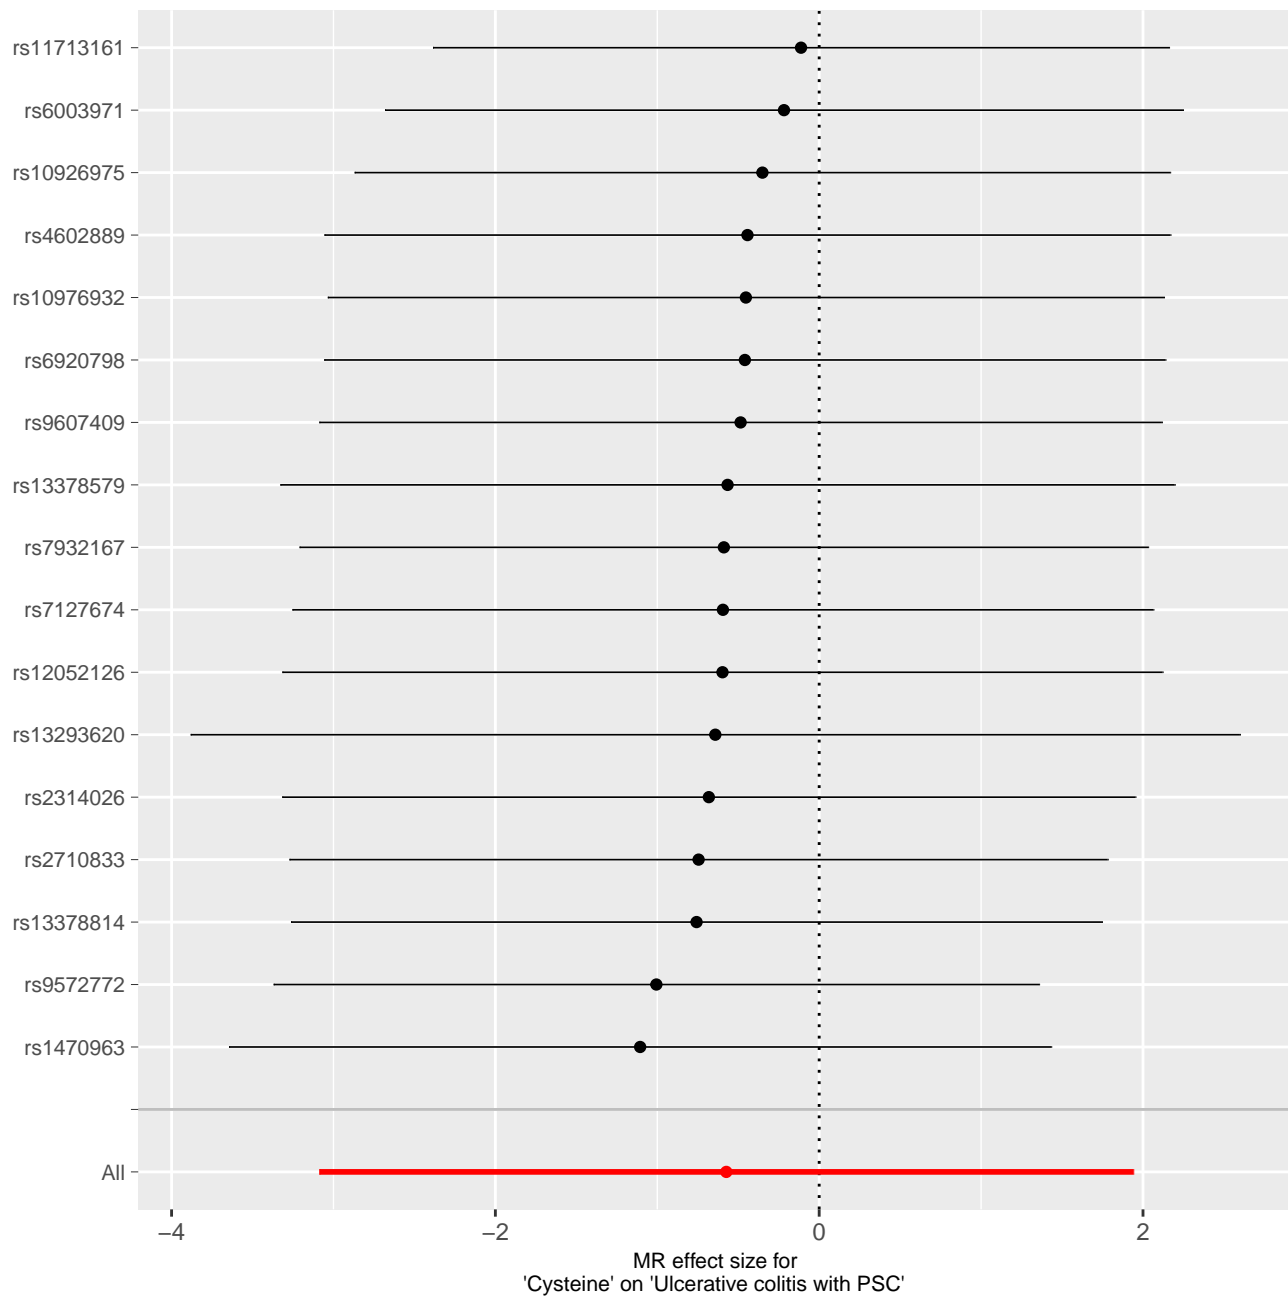

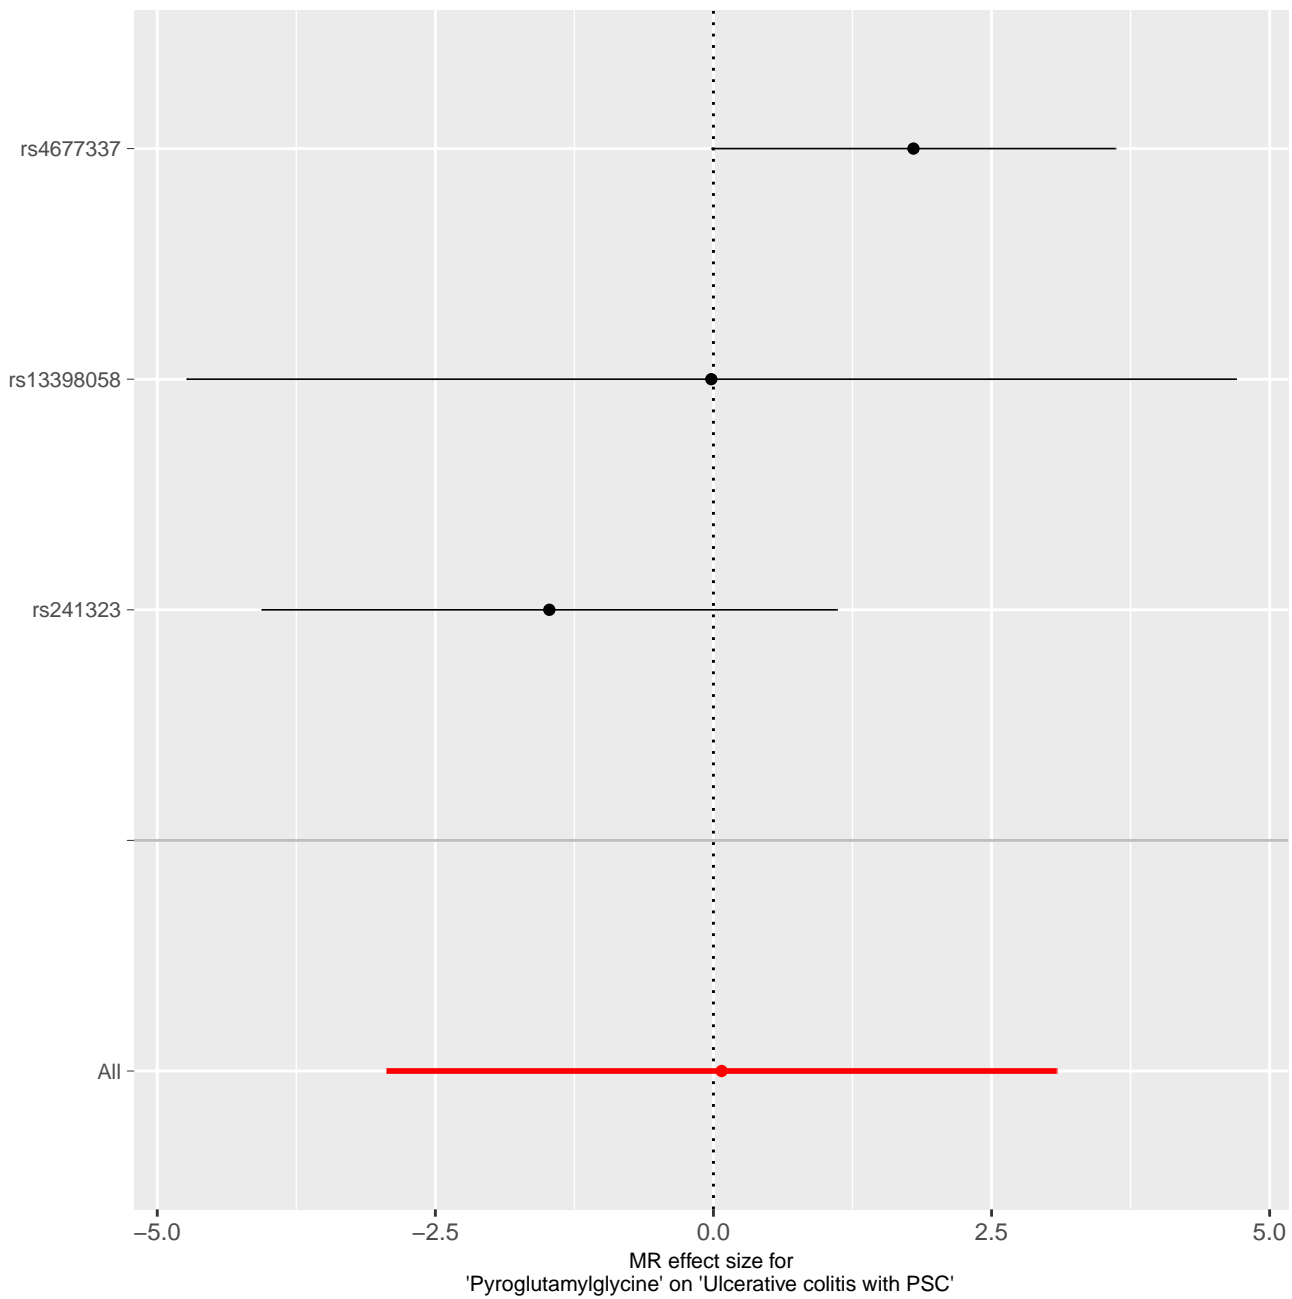

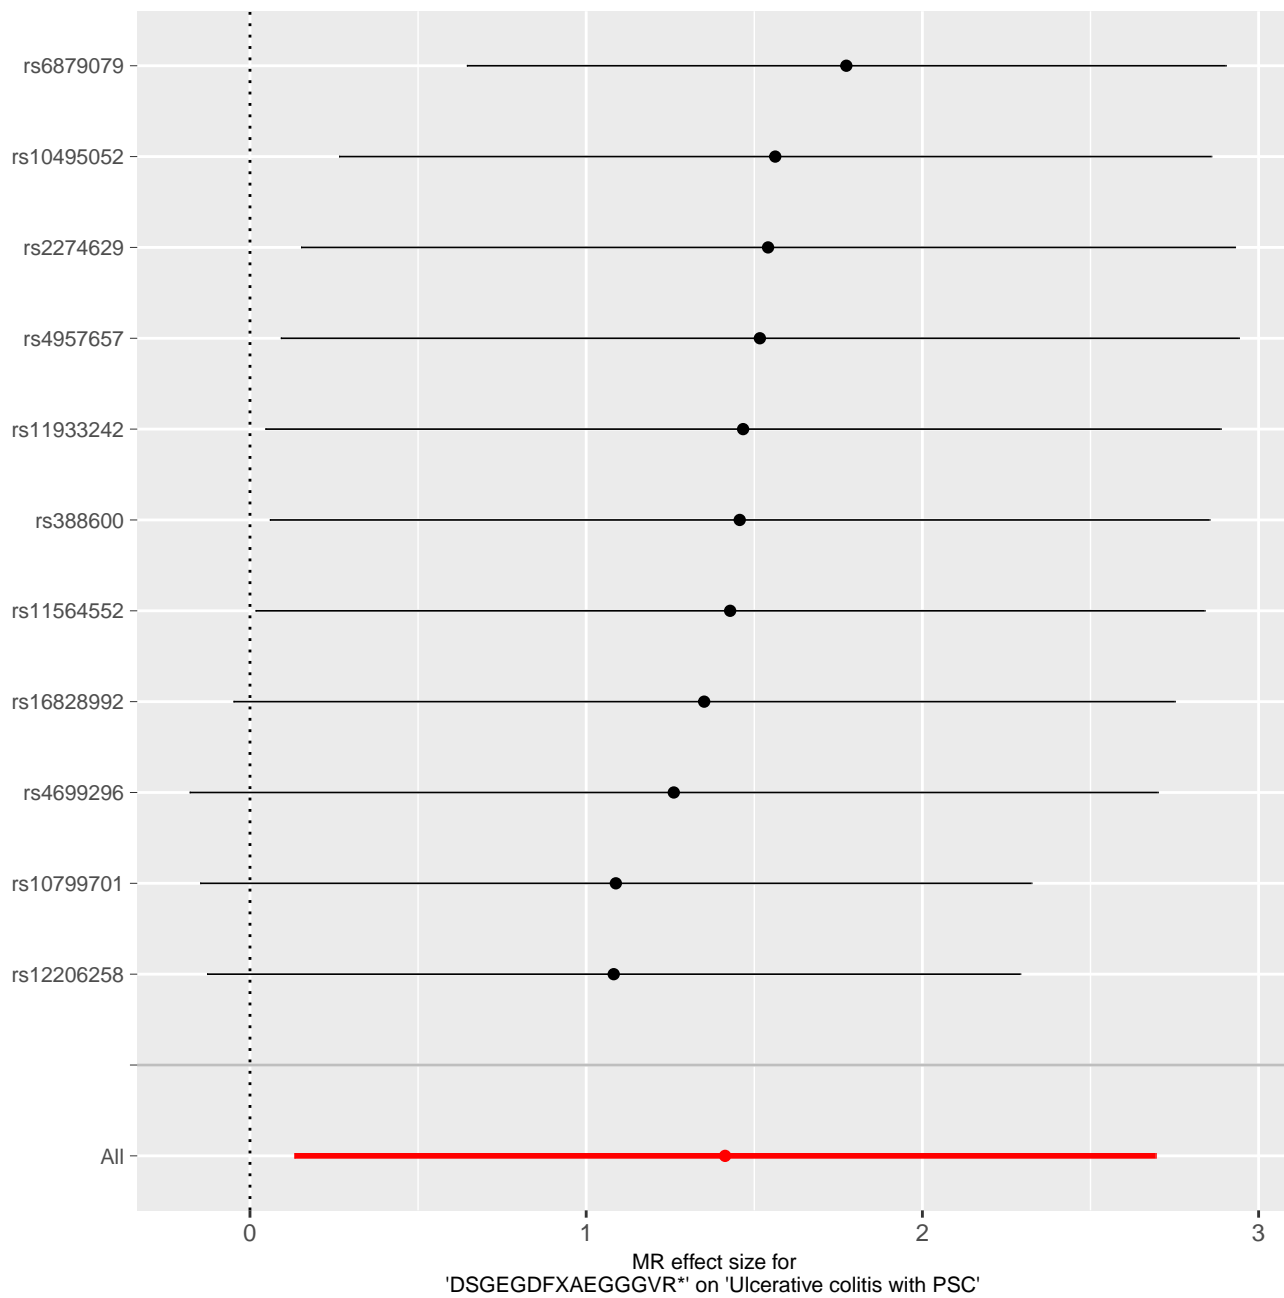



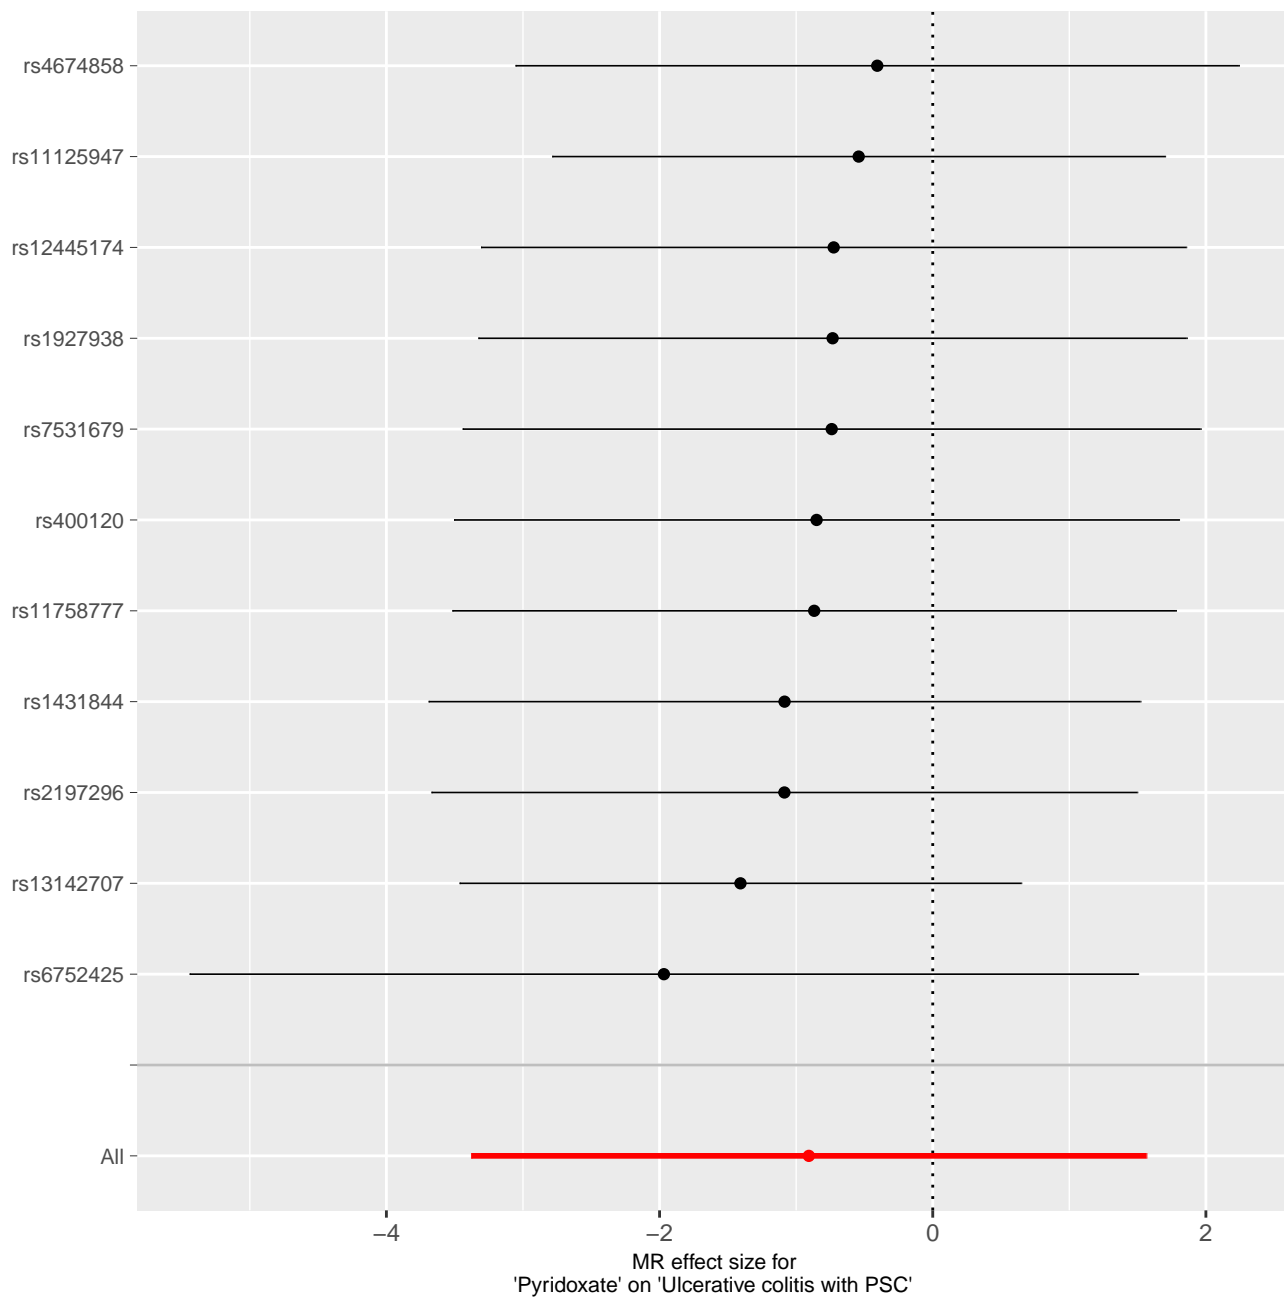

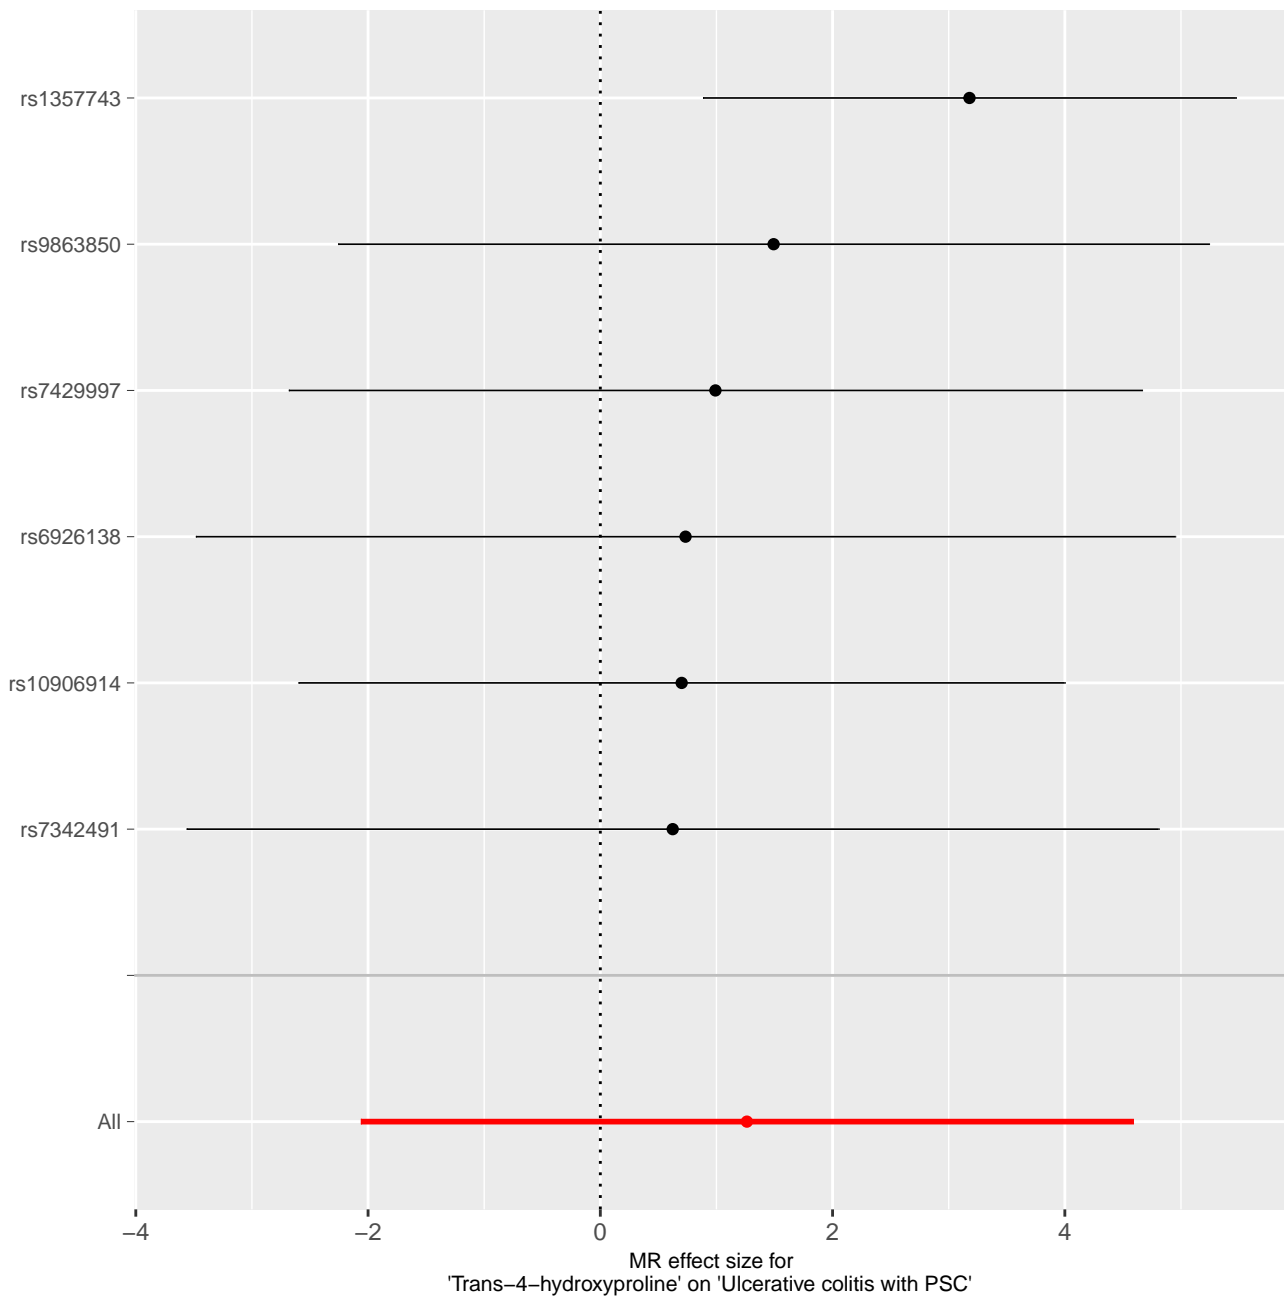

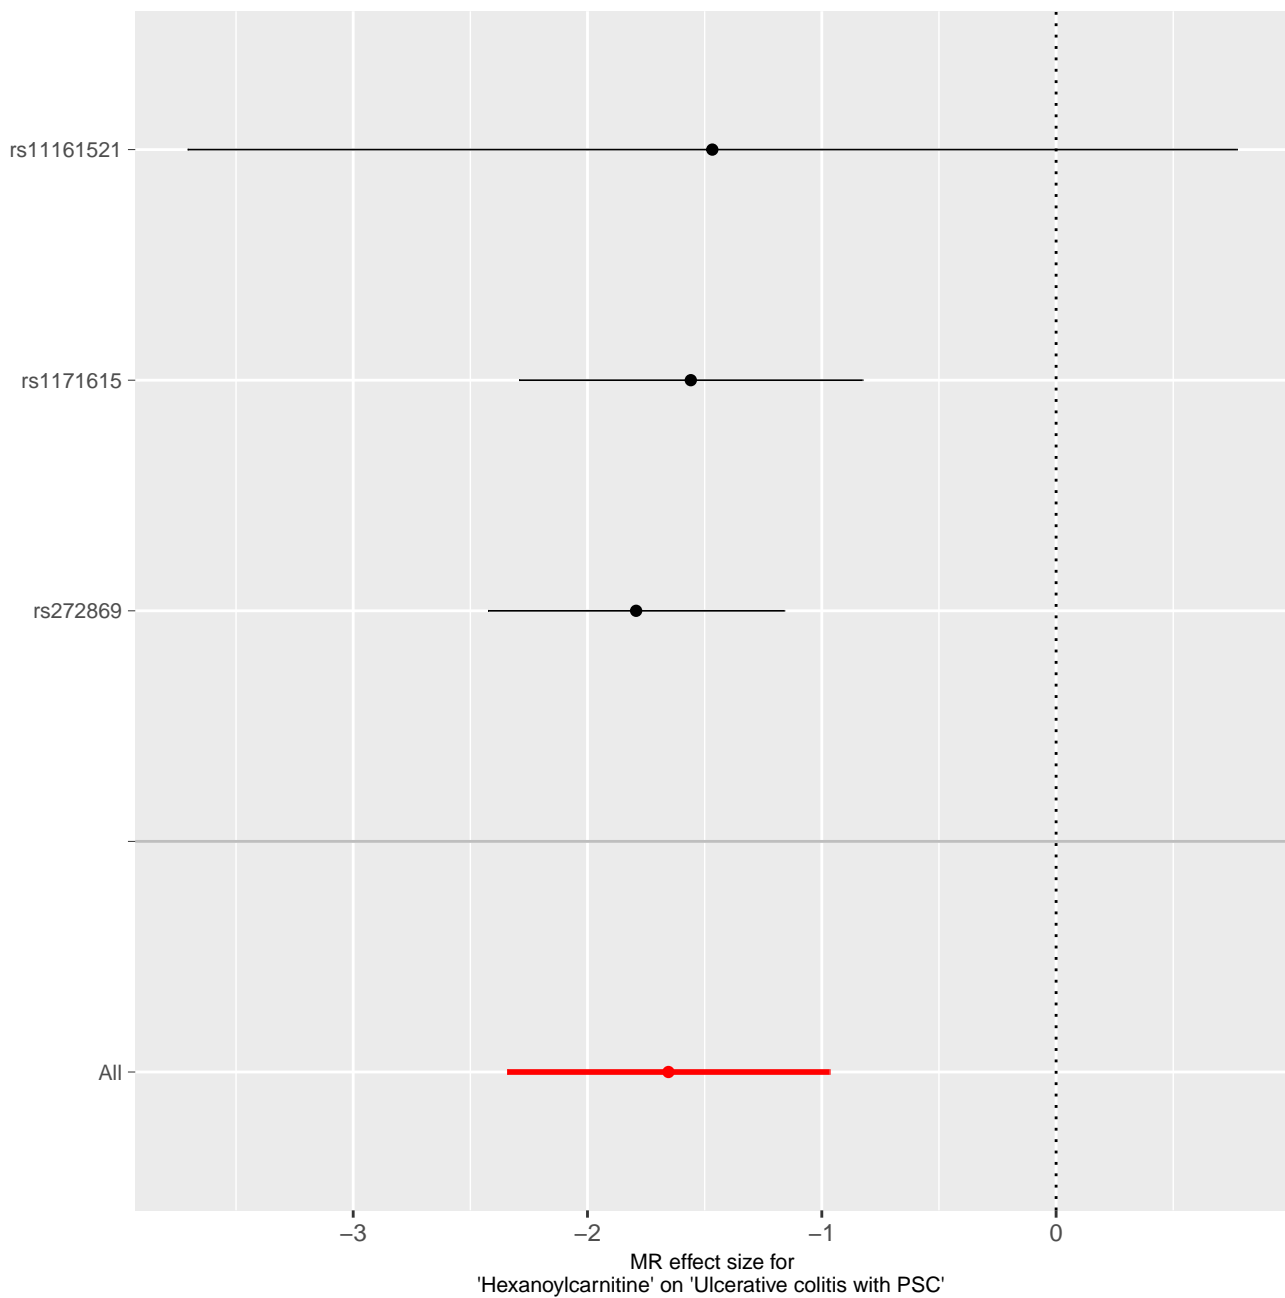

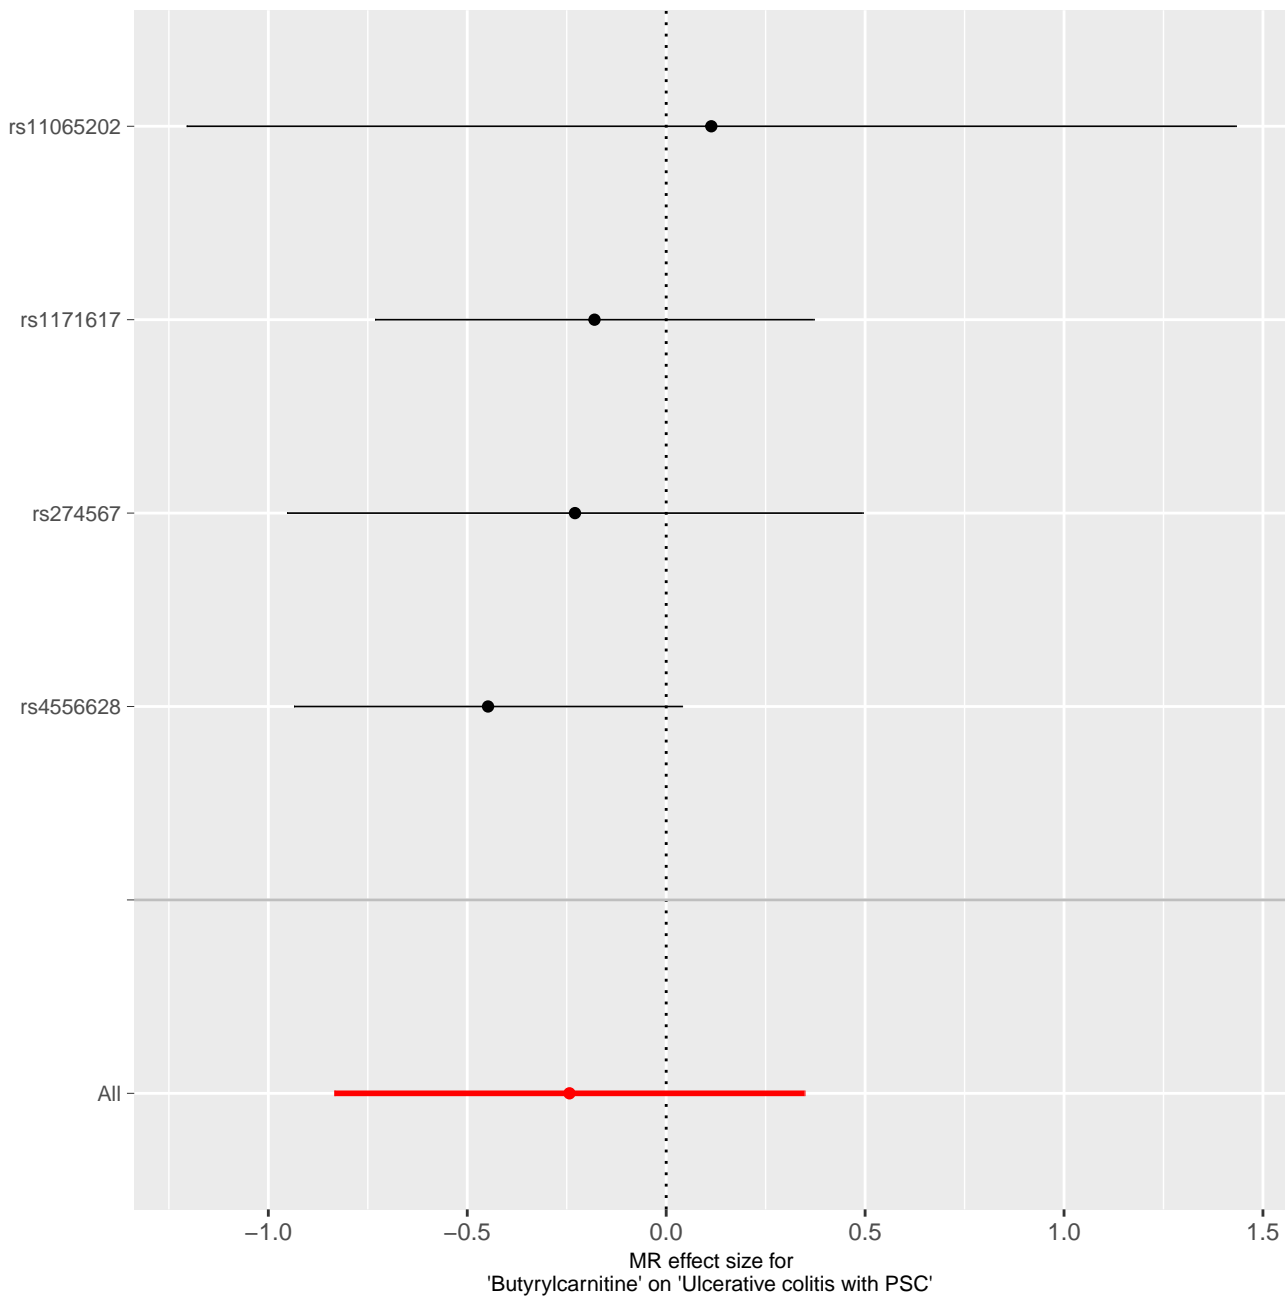

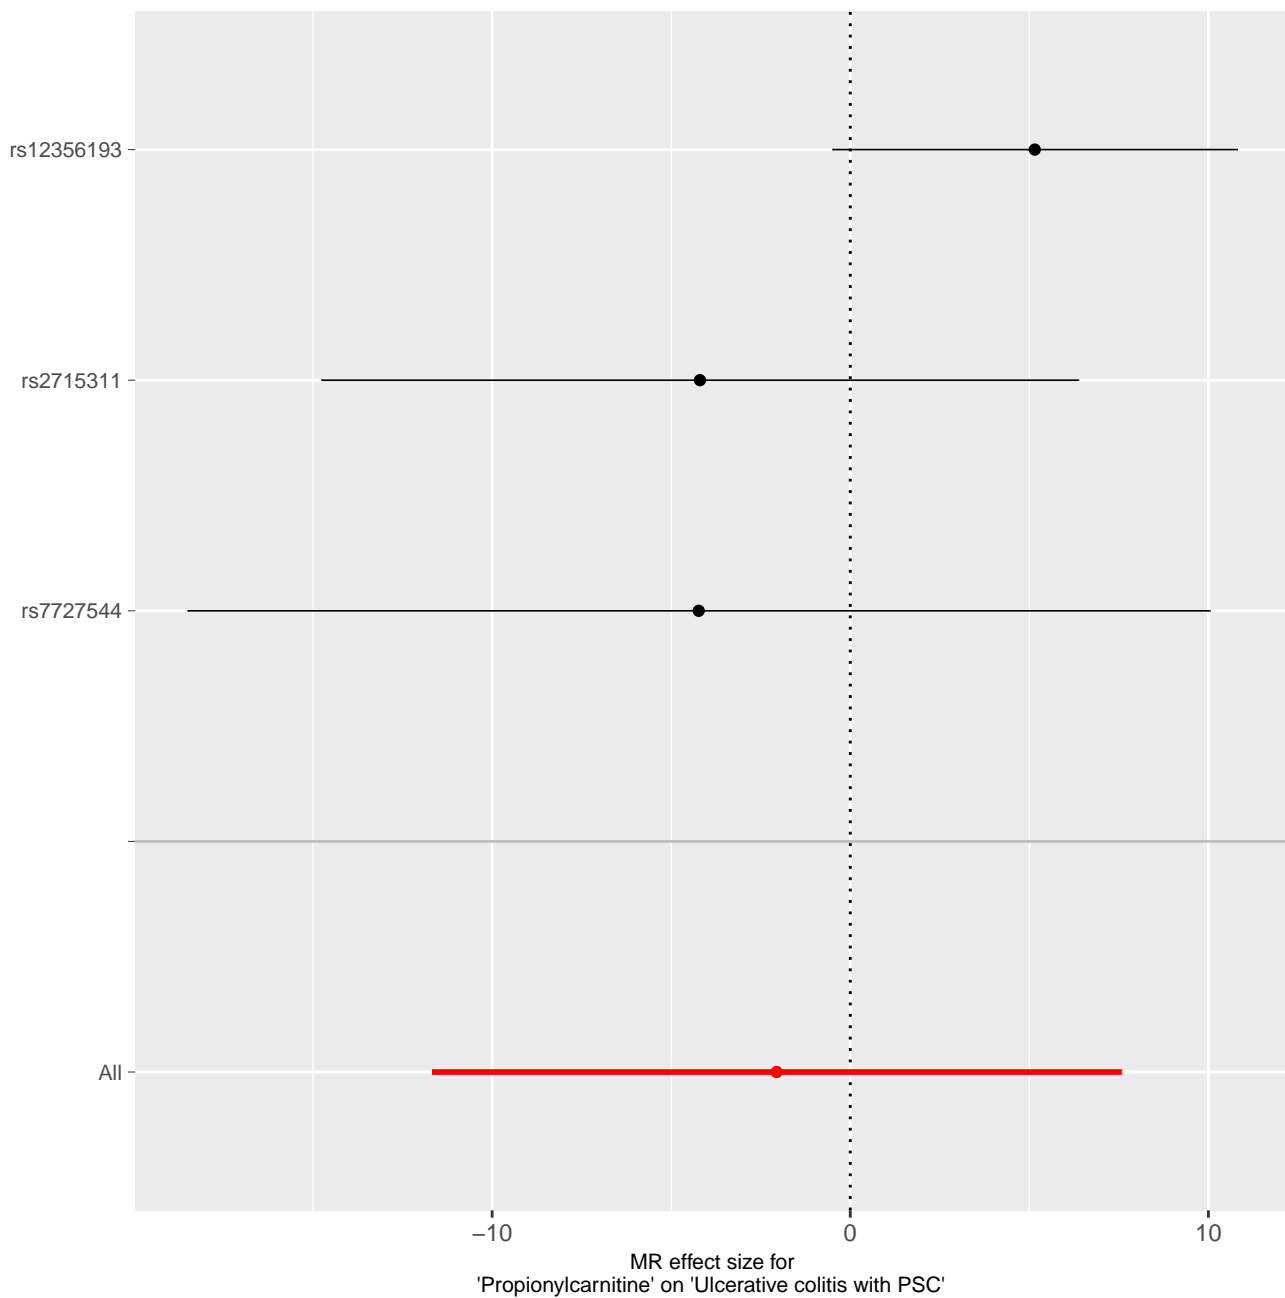

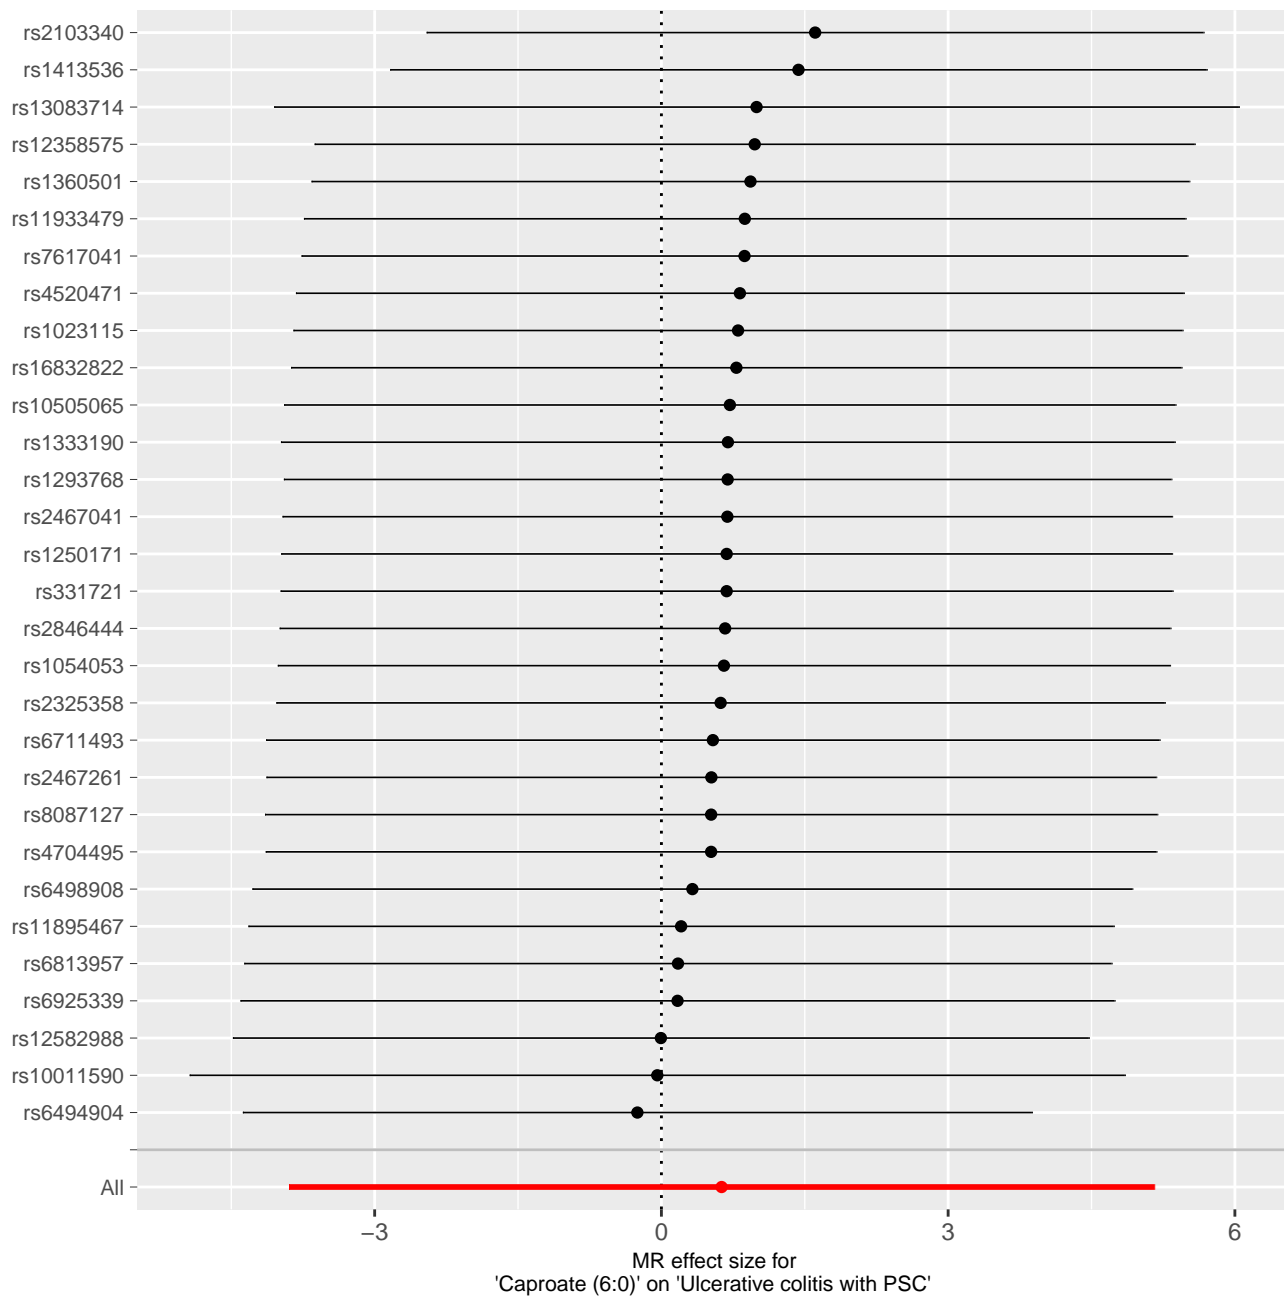

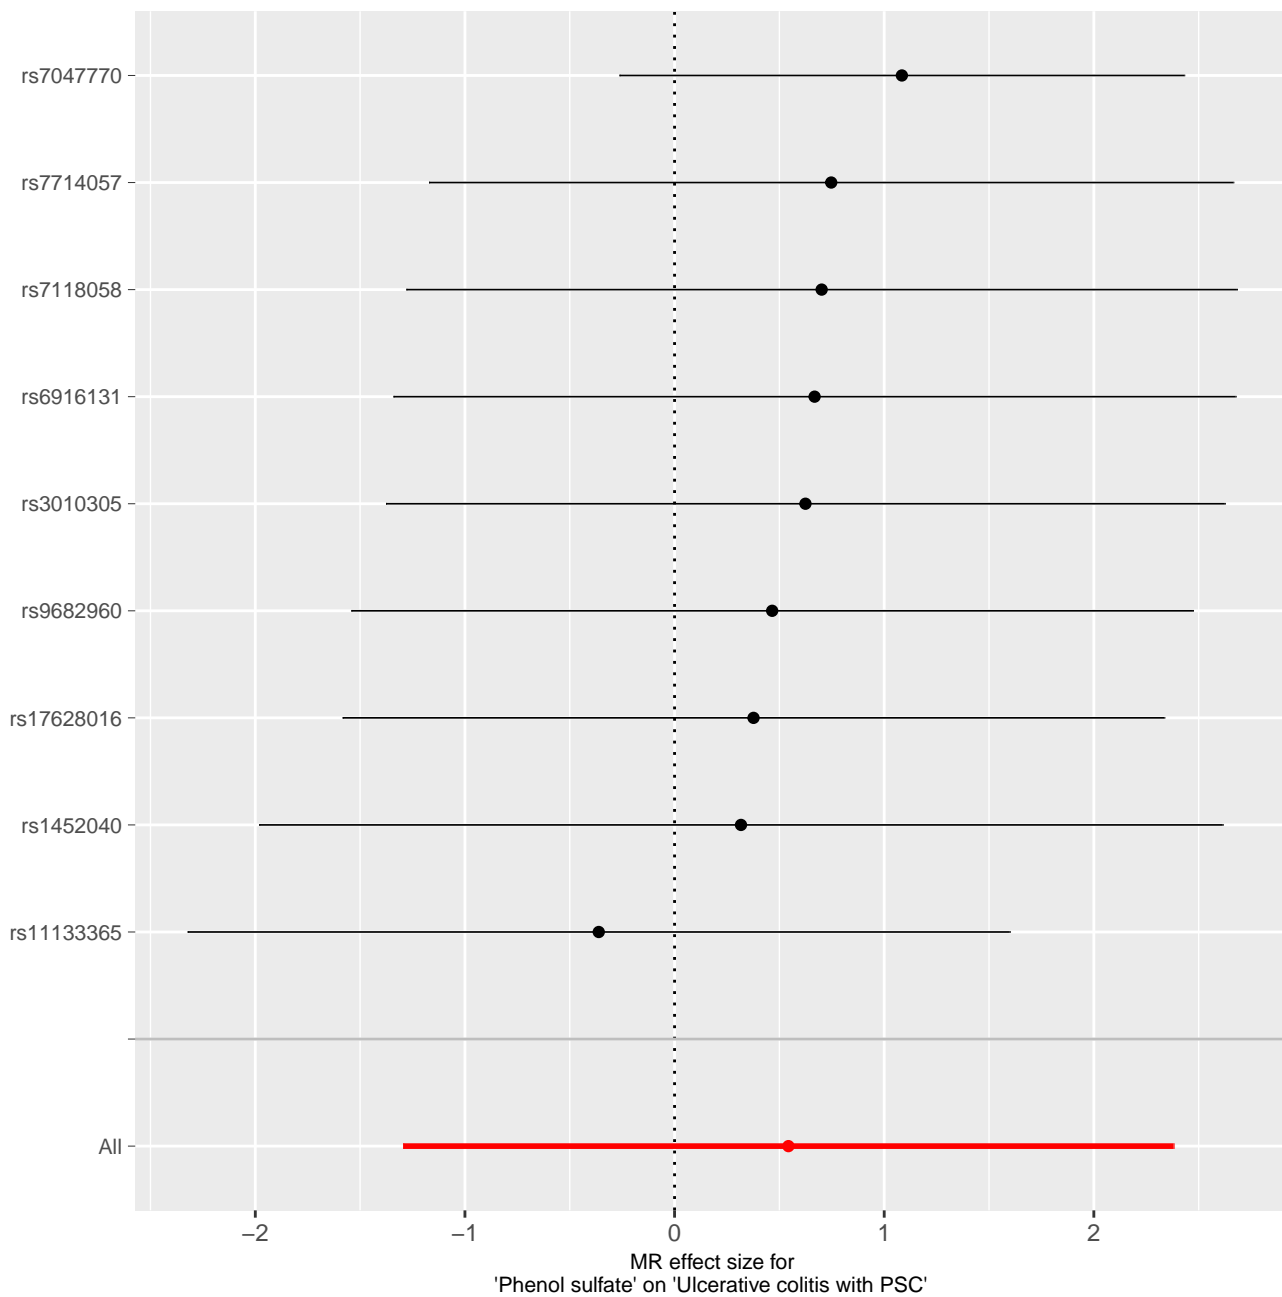

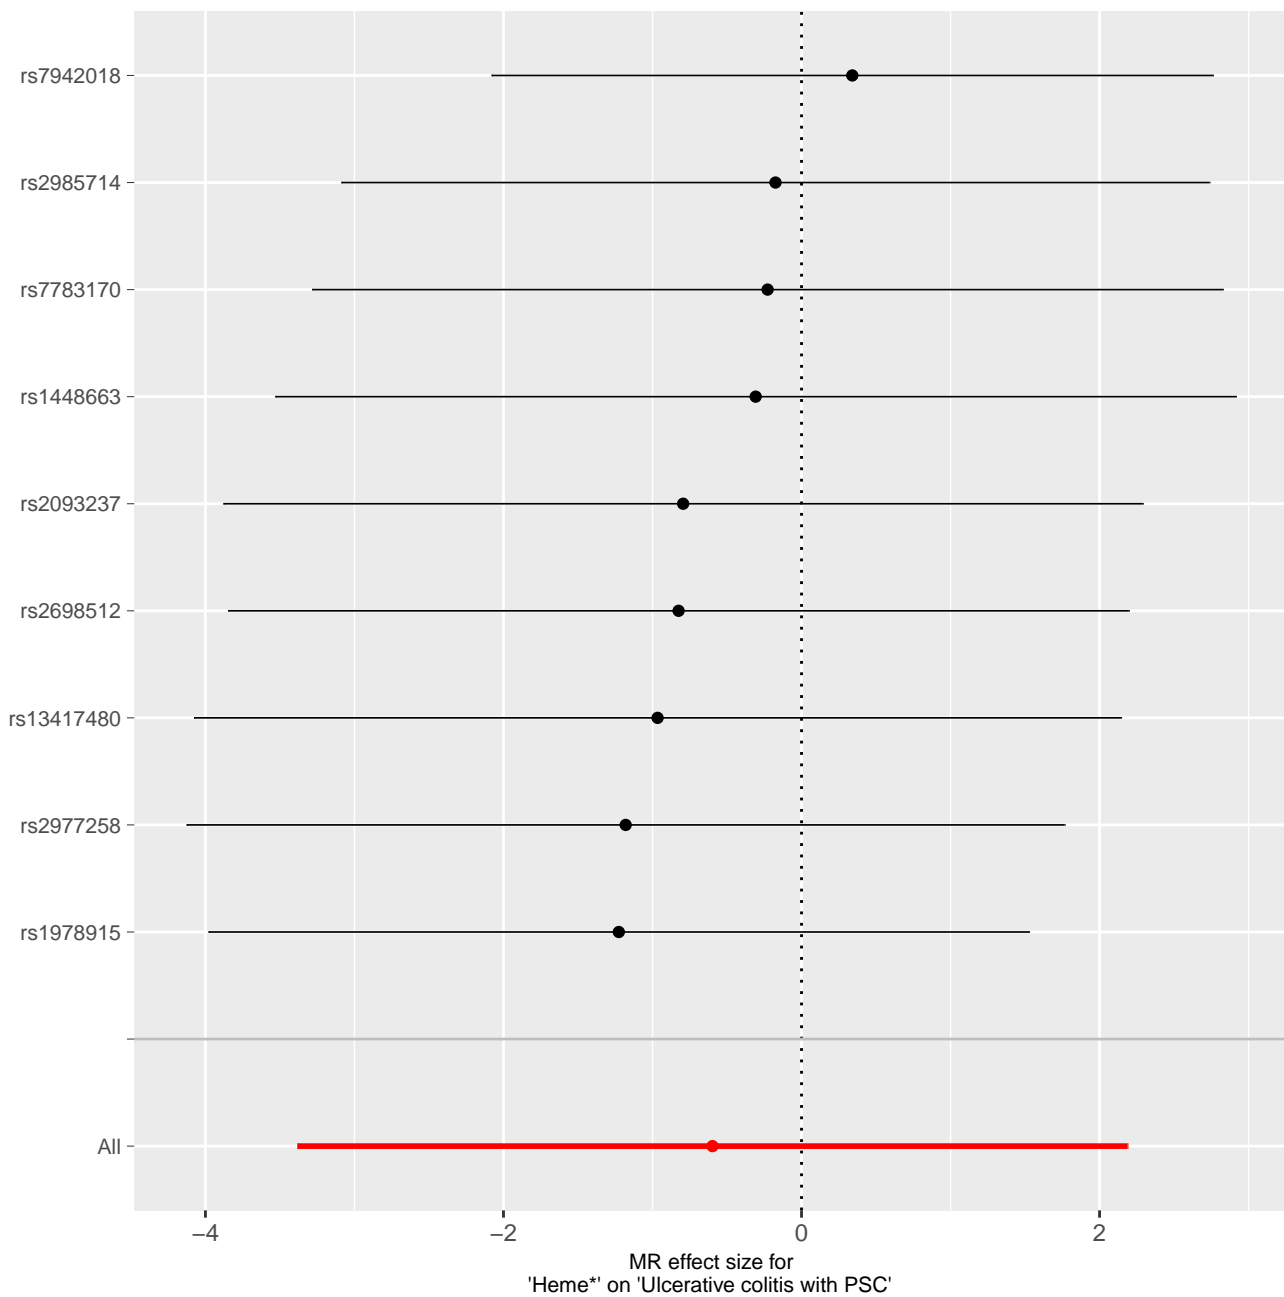



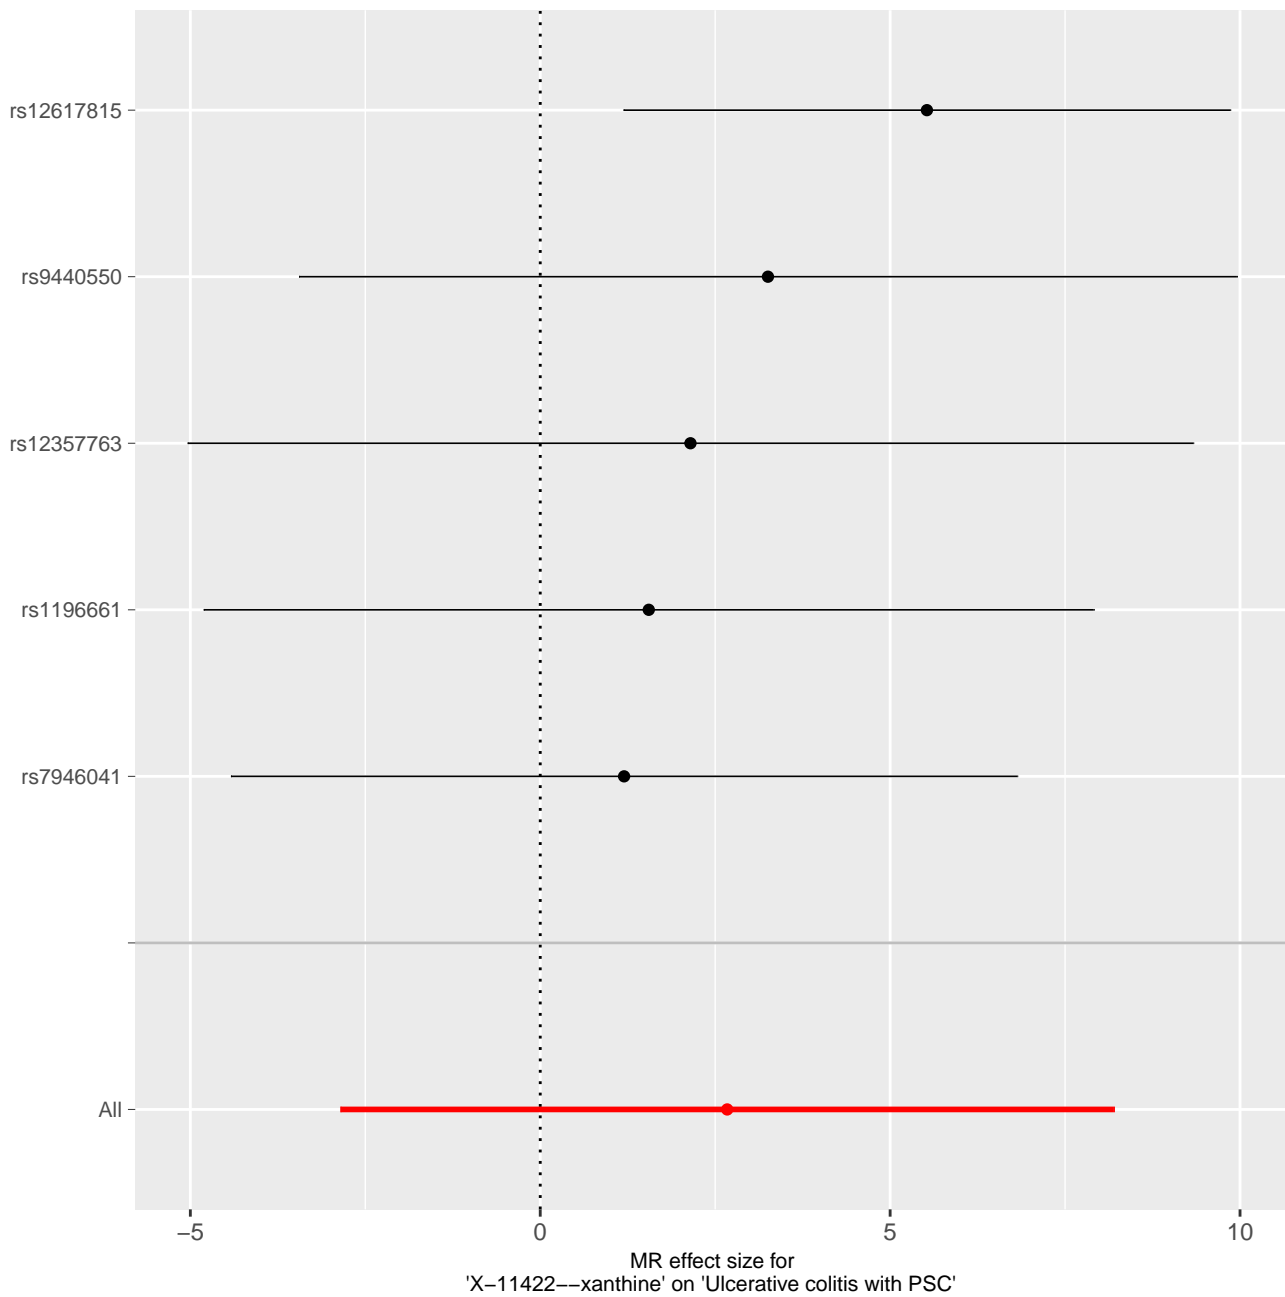

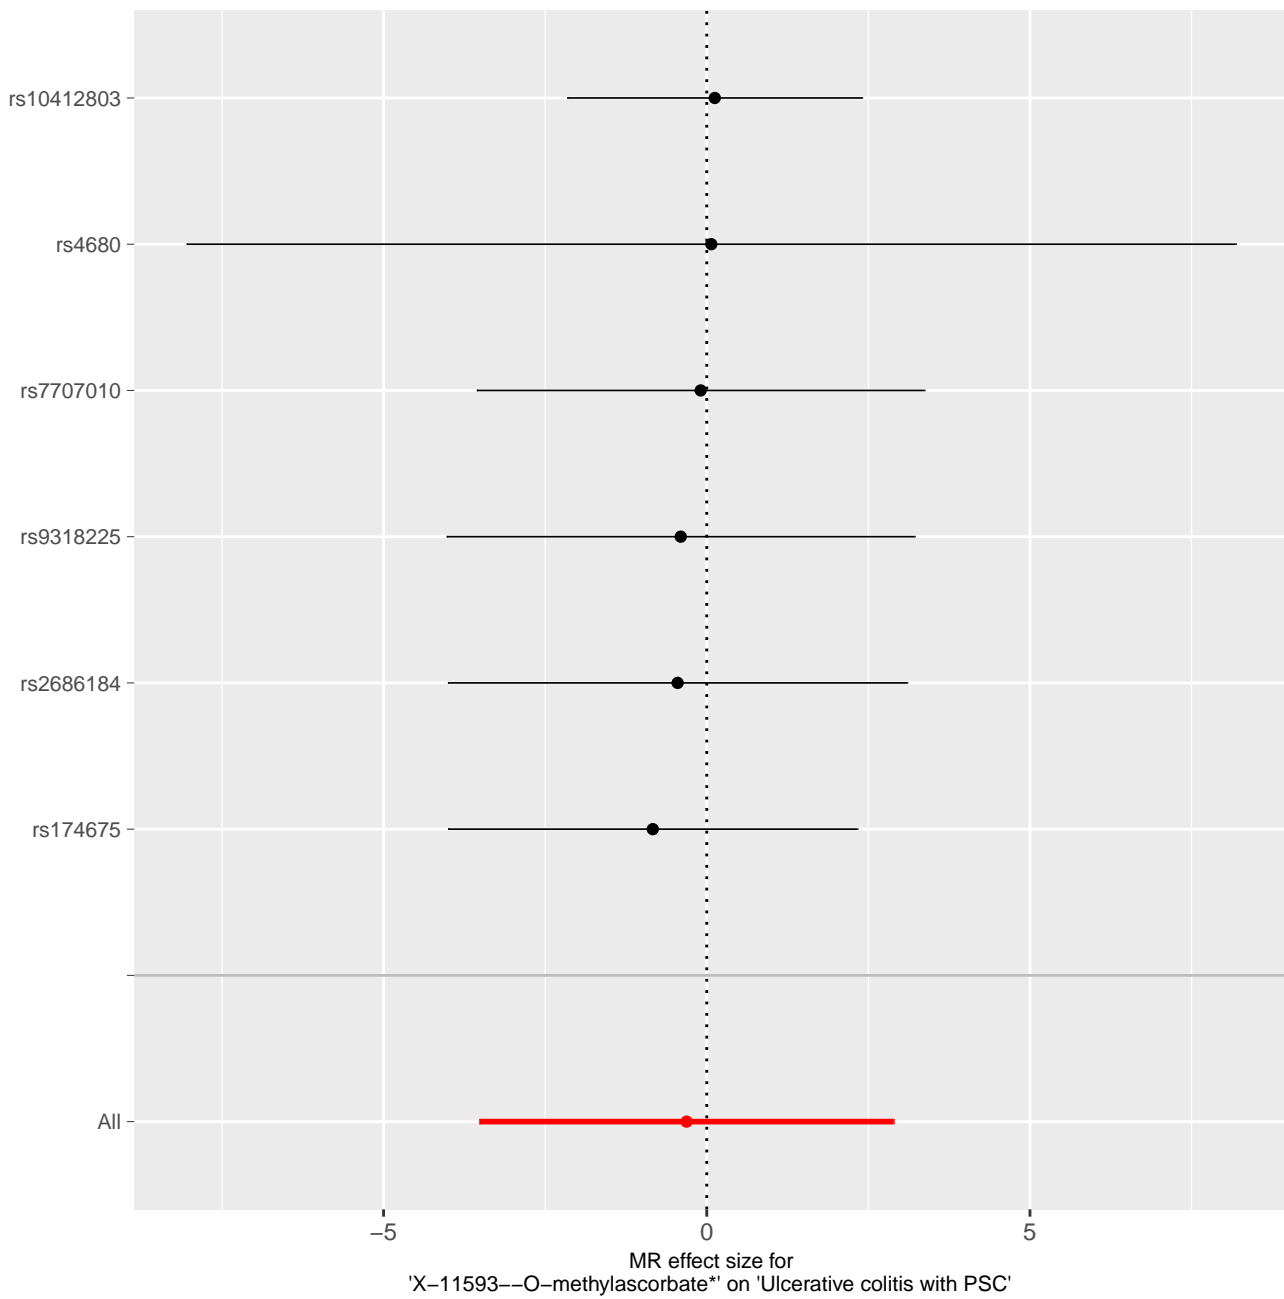

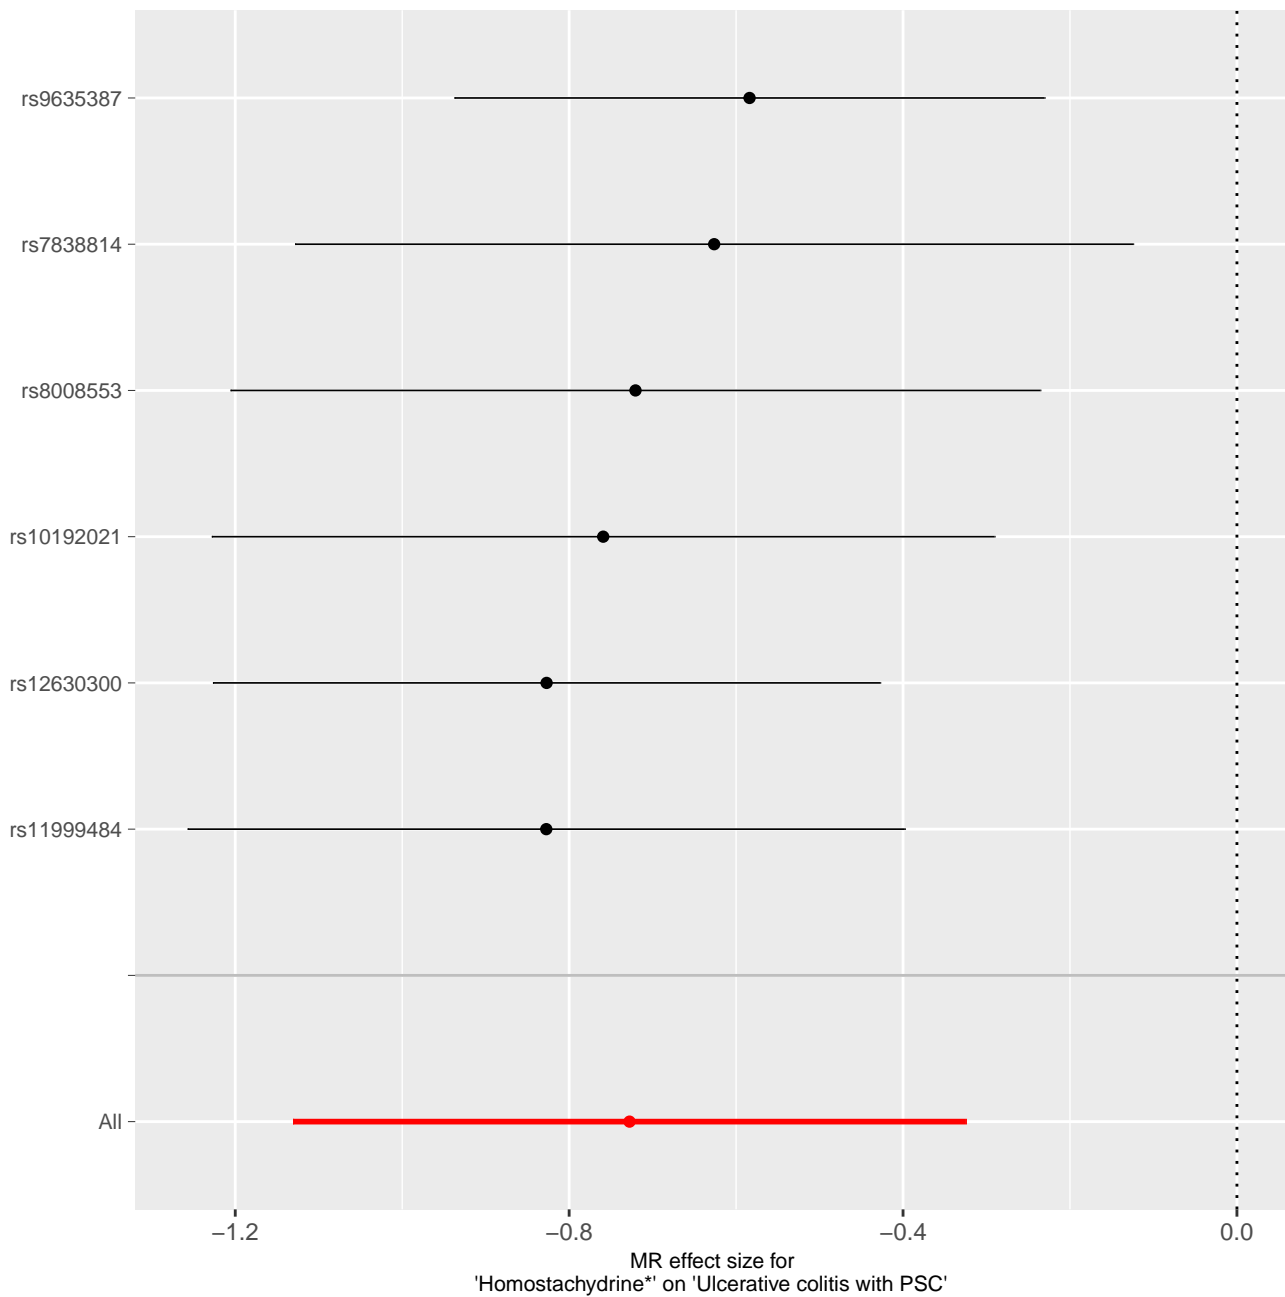

rs748196

rs174535

rs3738544

All

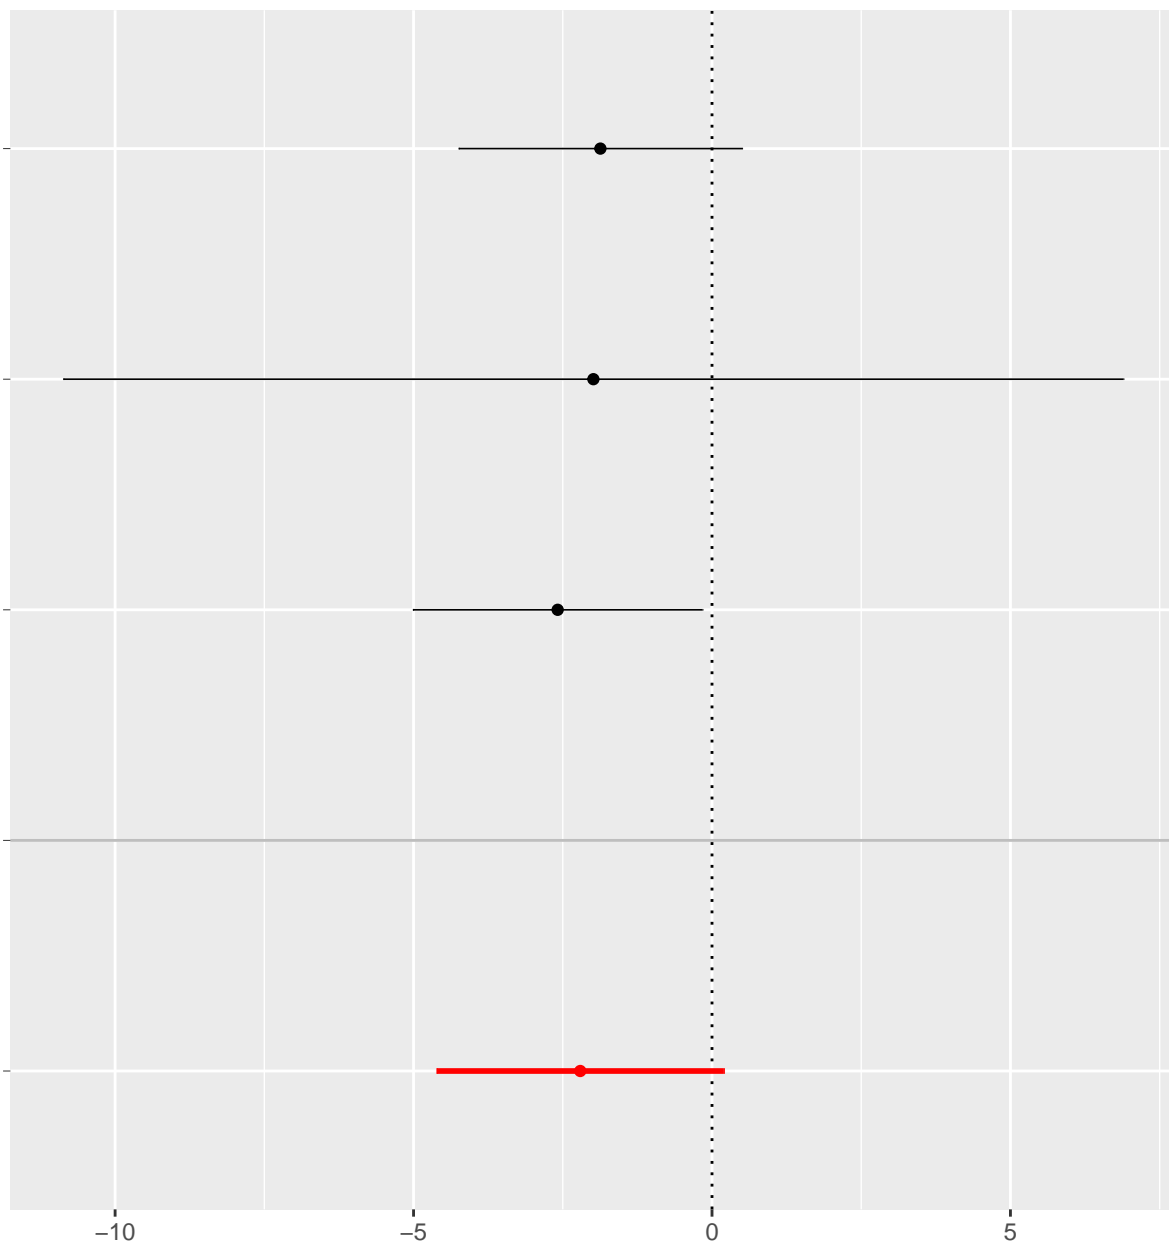

MR effect size for  
'1-arachidonoylglycerophosphocholine\*' on 'Ulcerative colitis with PSC'

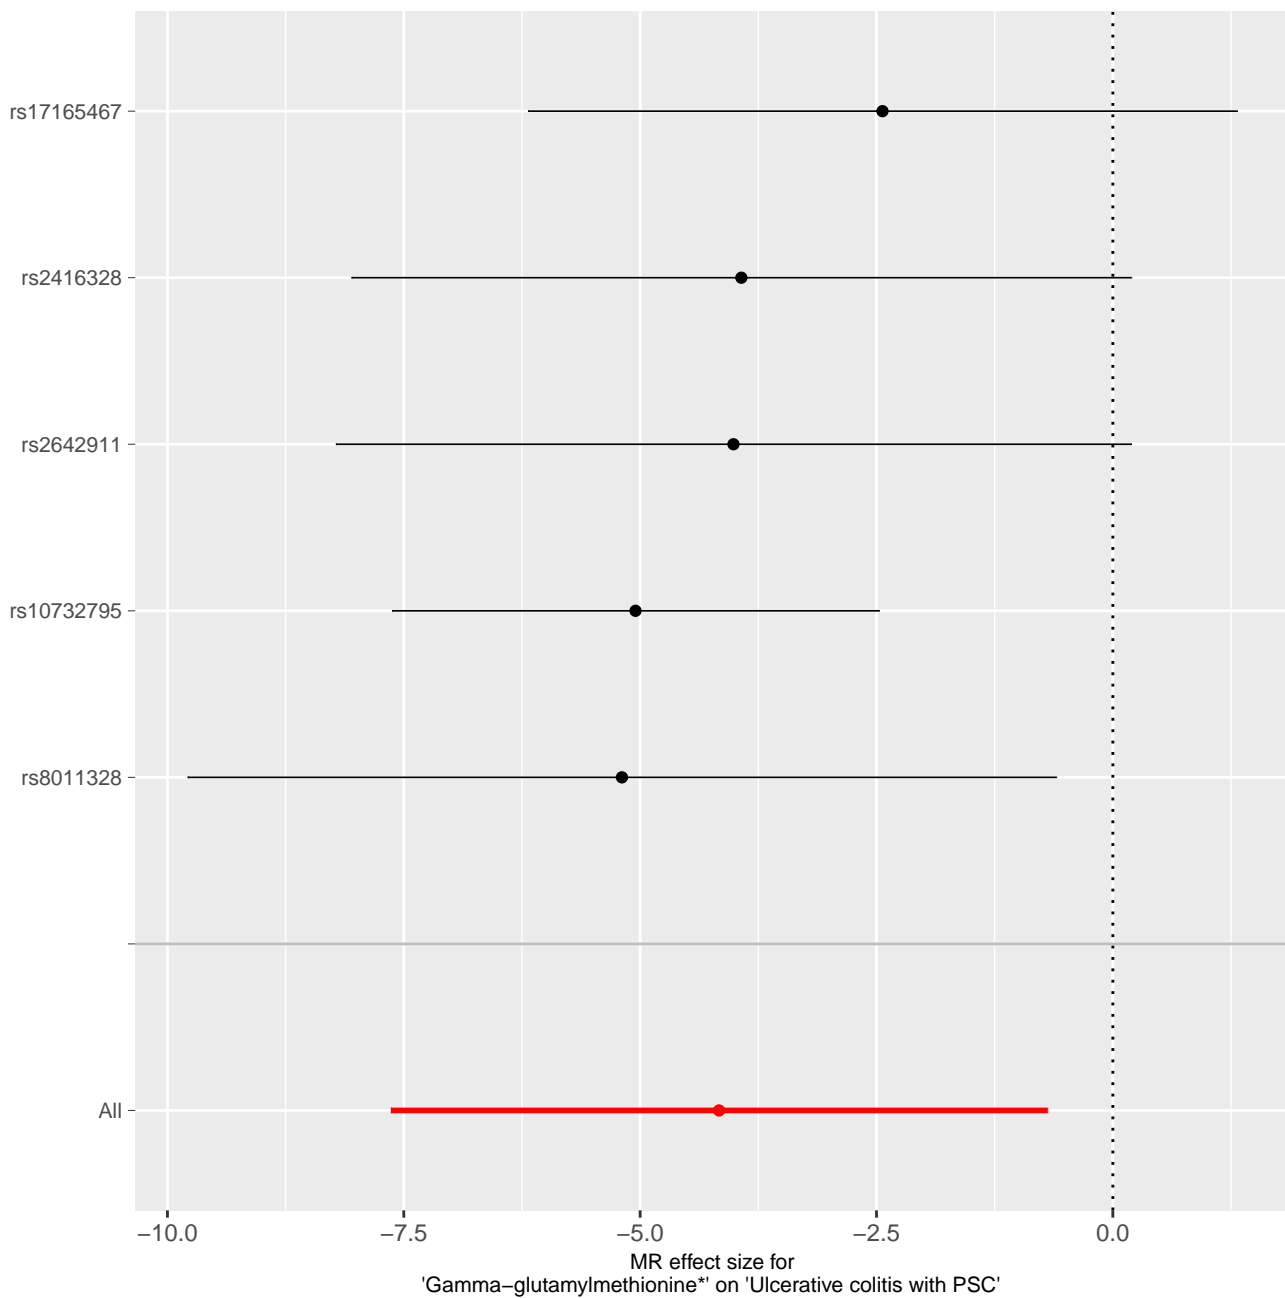

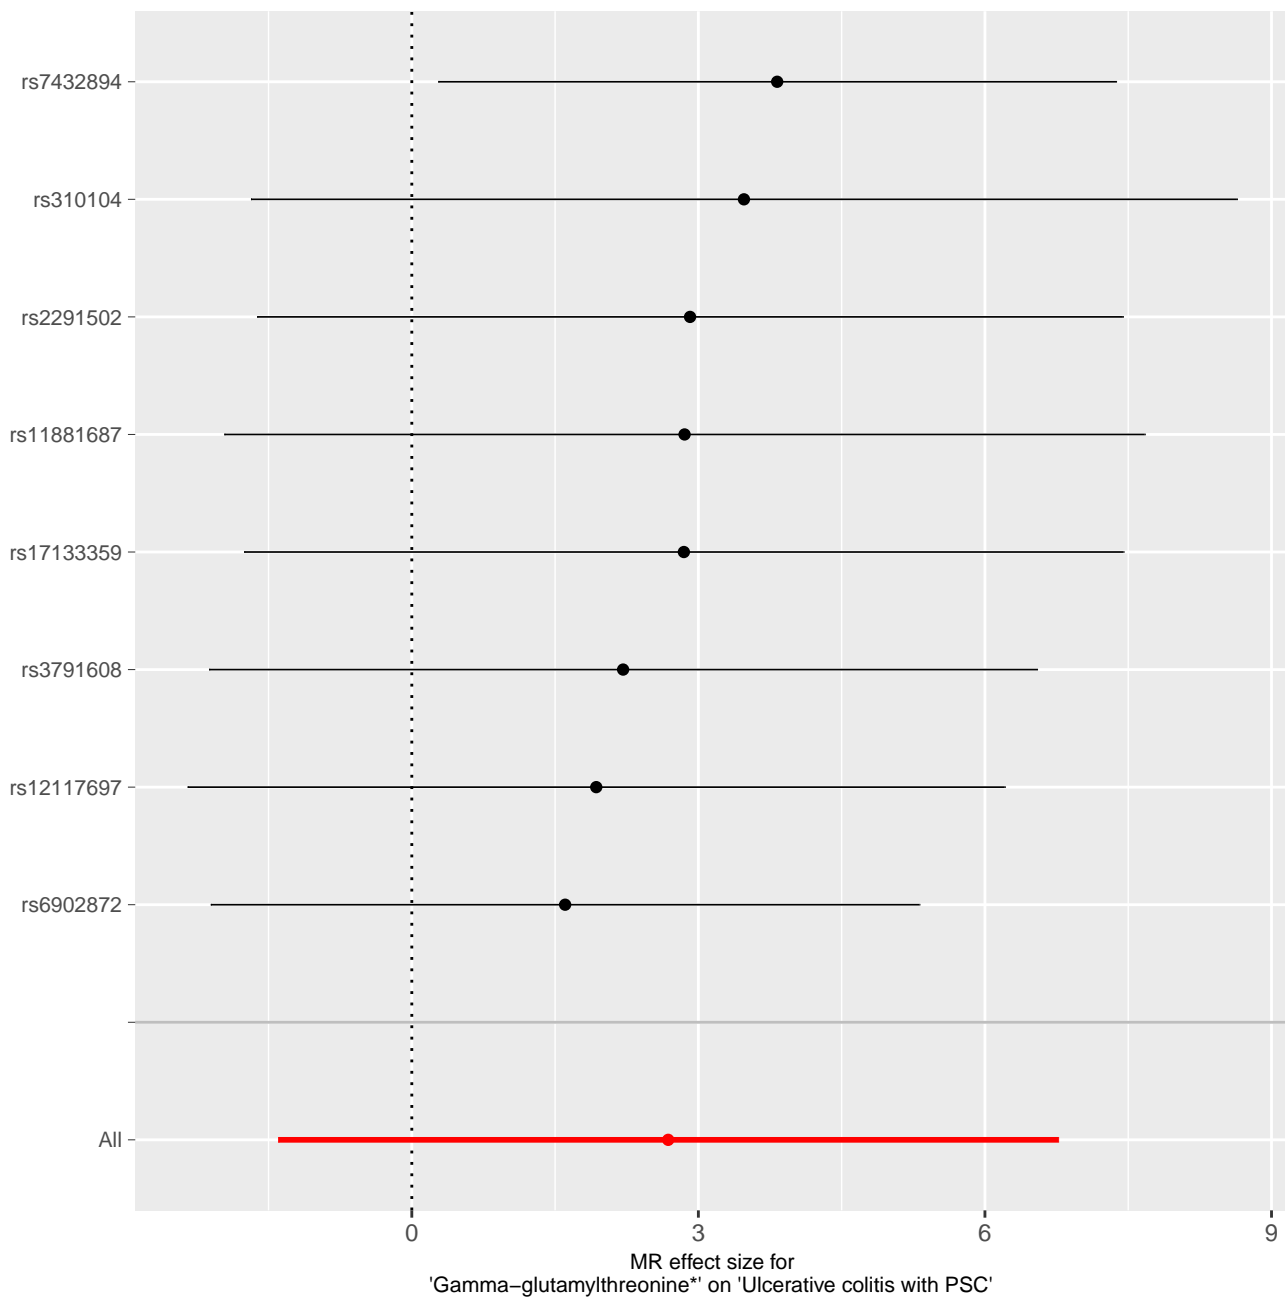

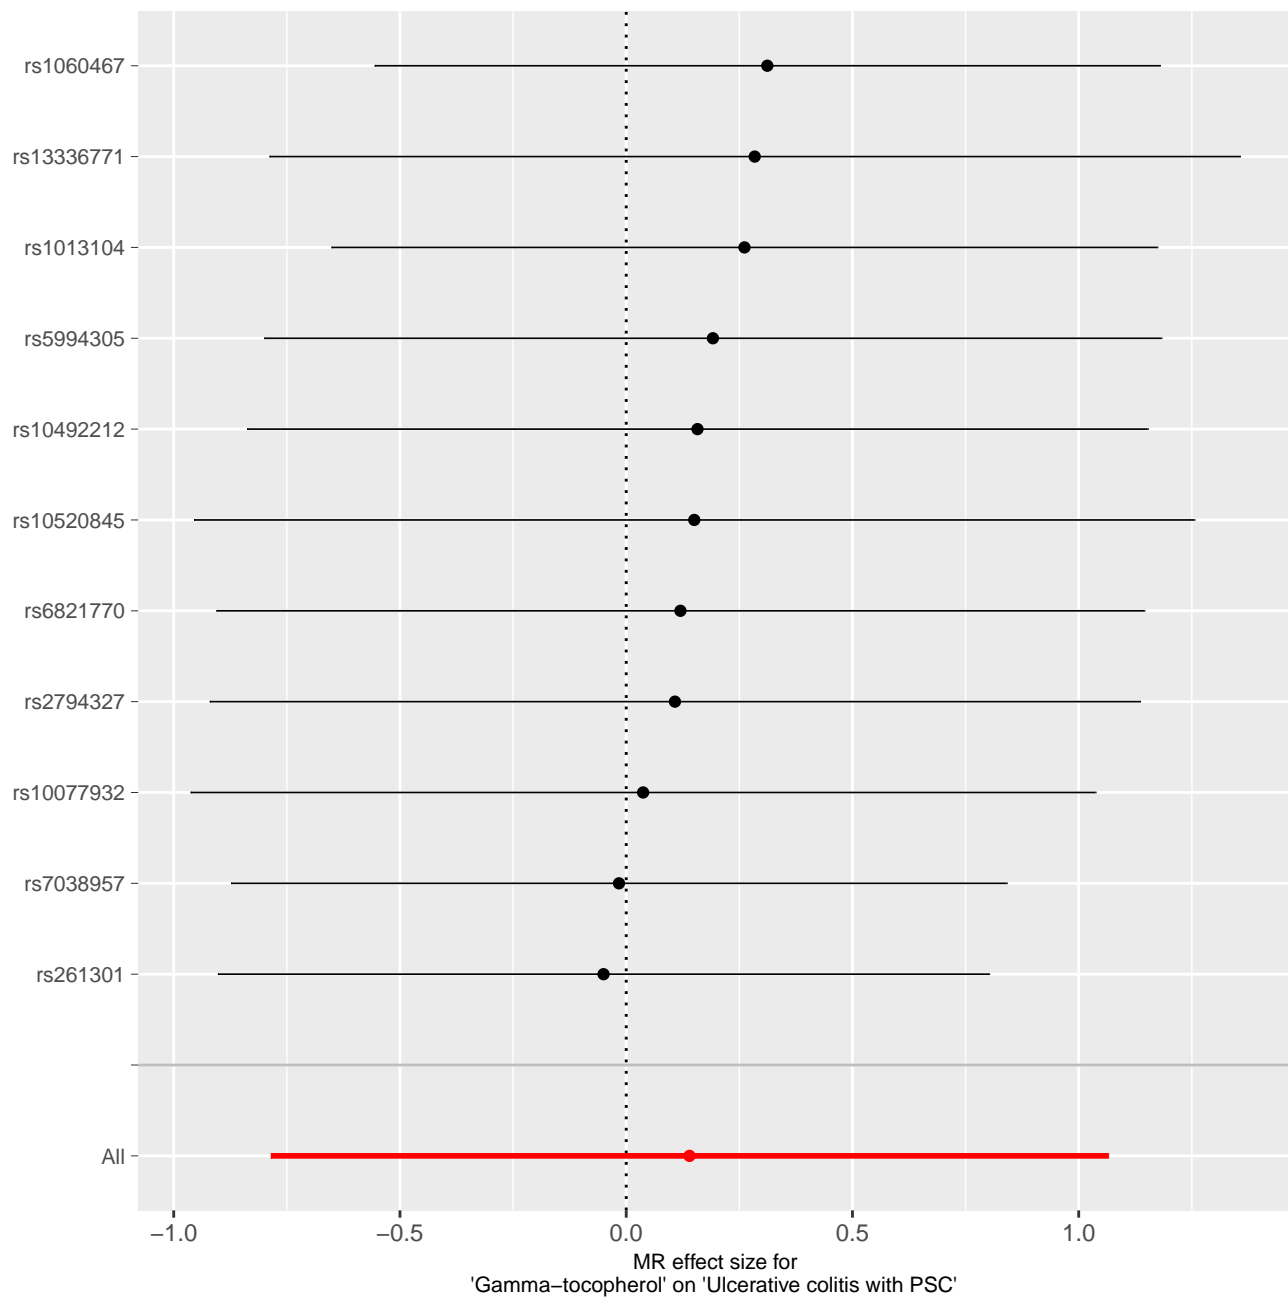

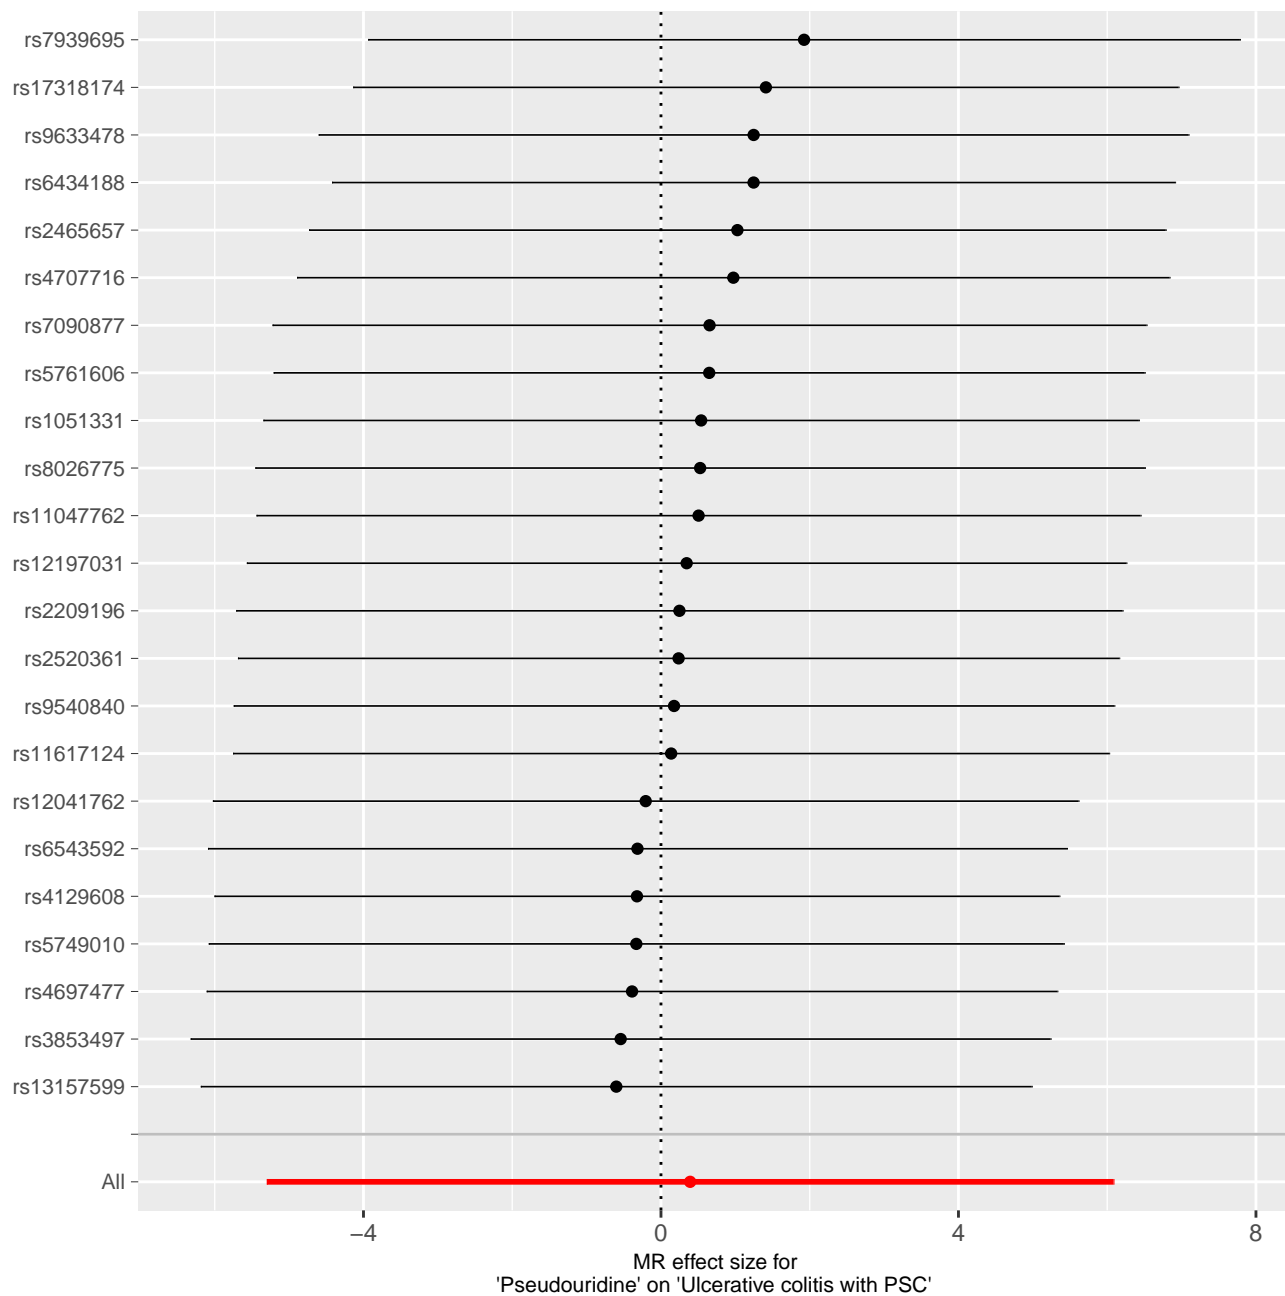



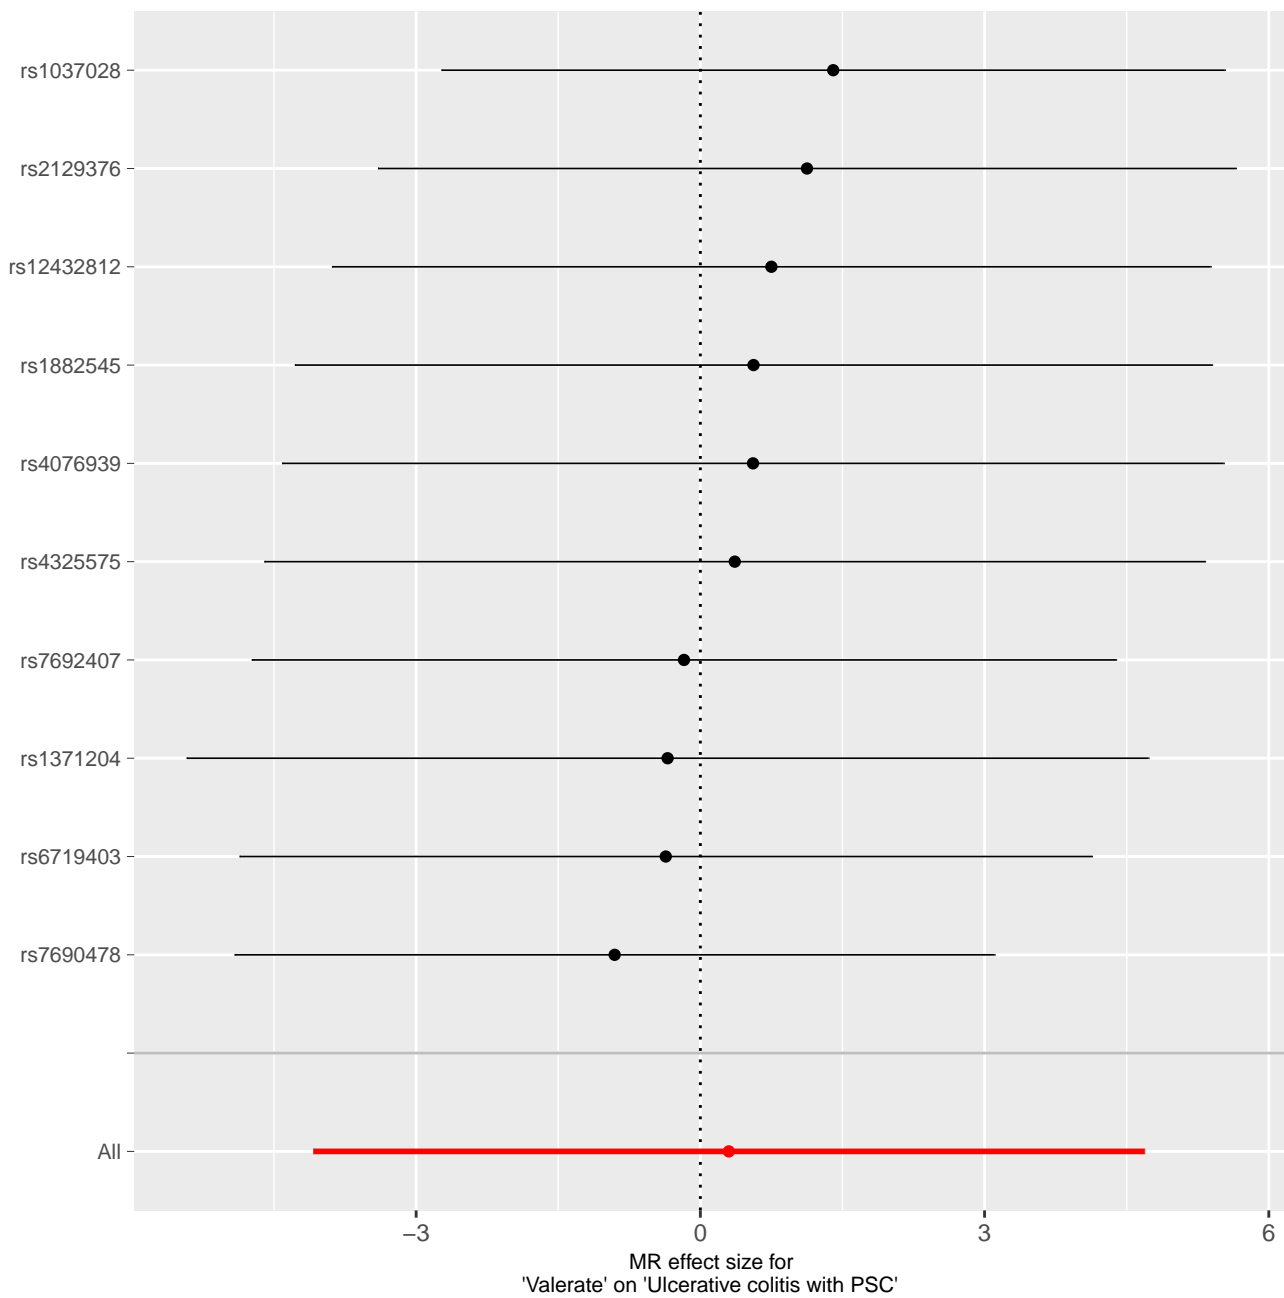

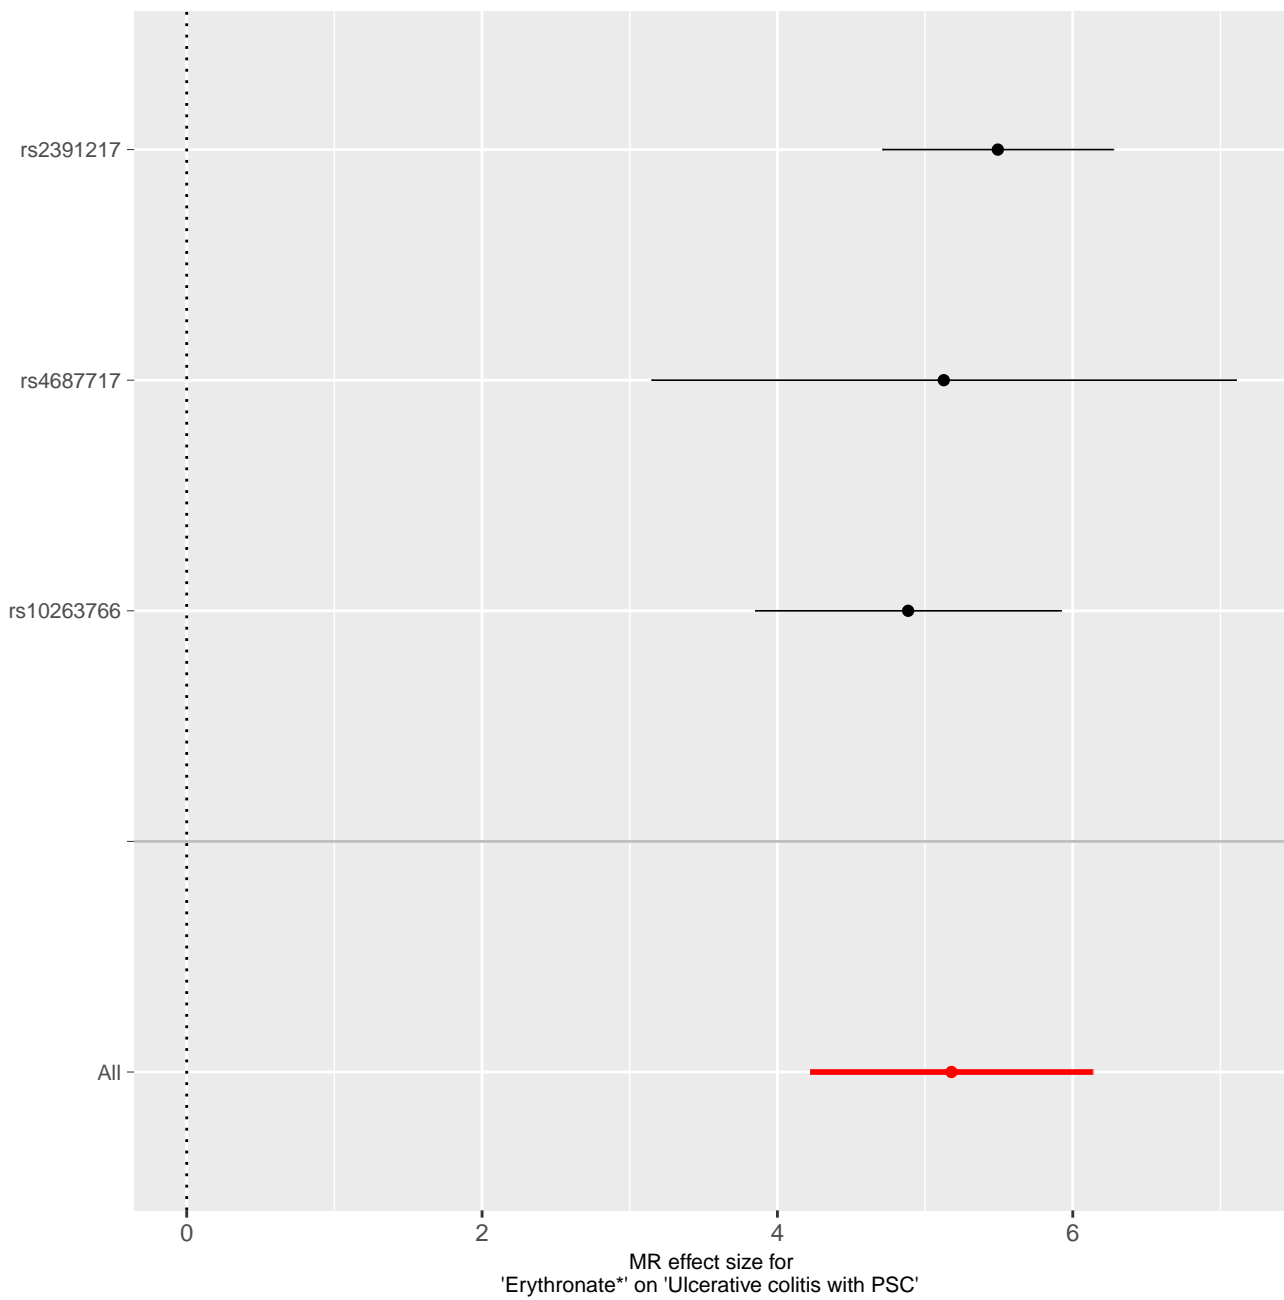

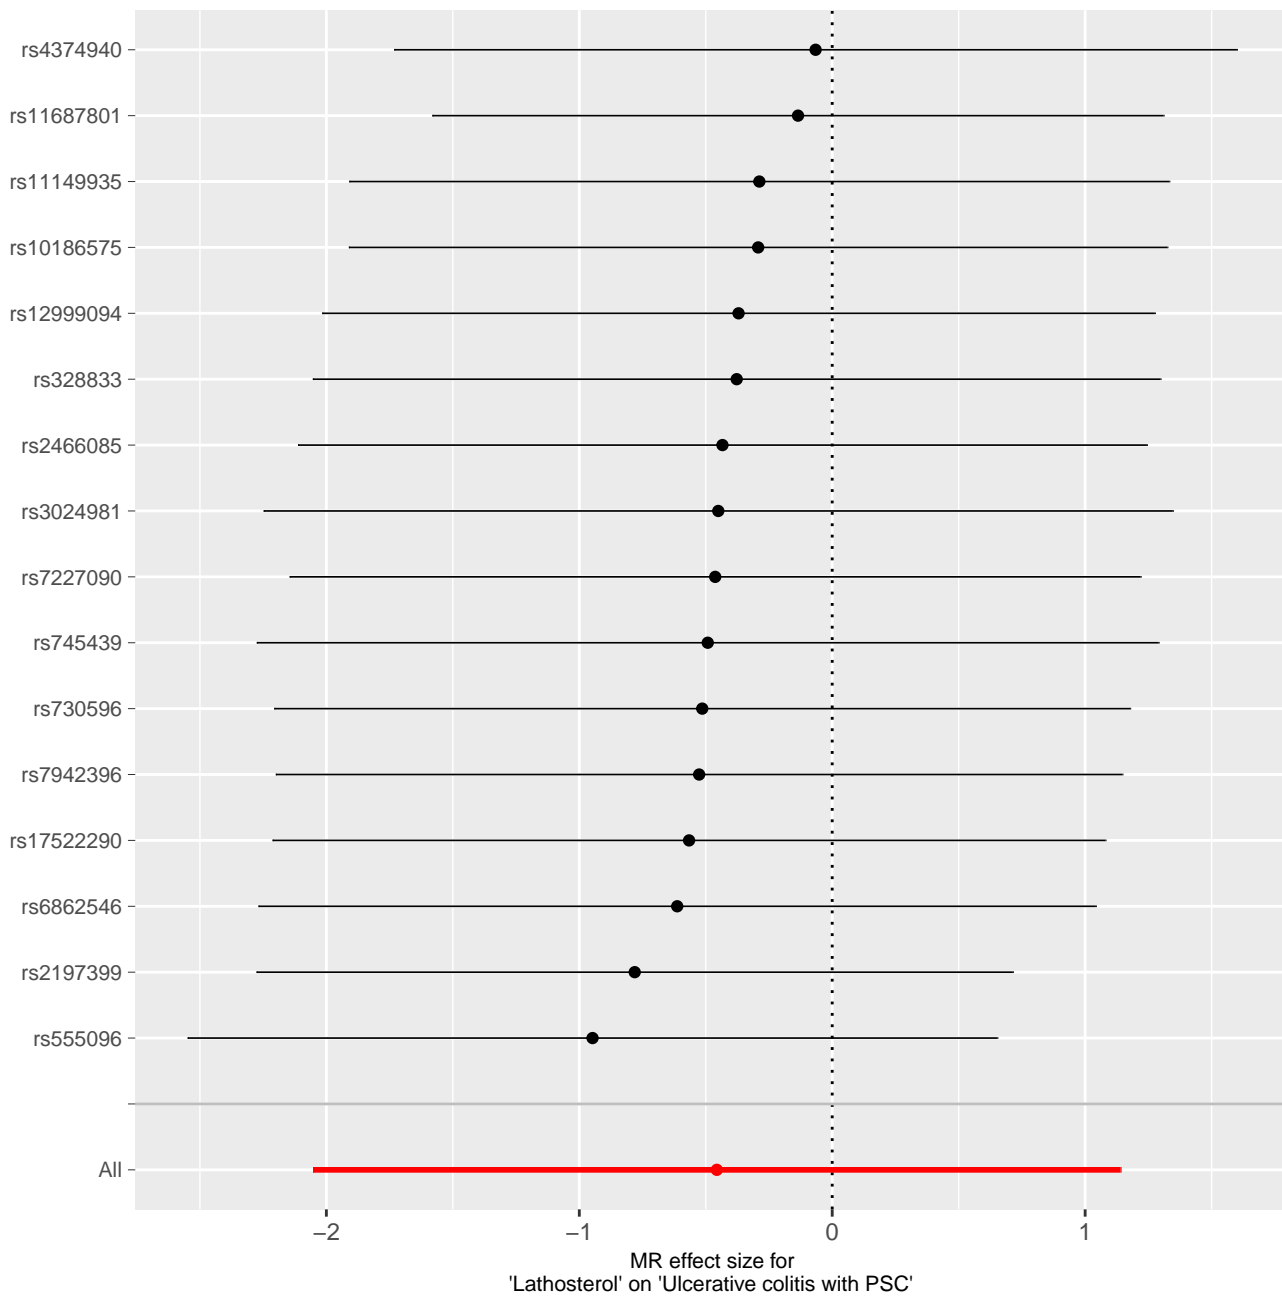

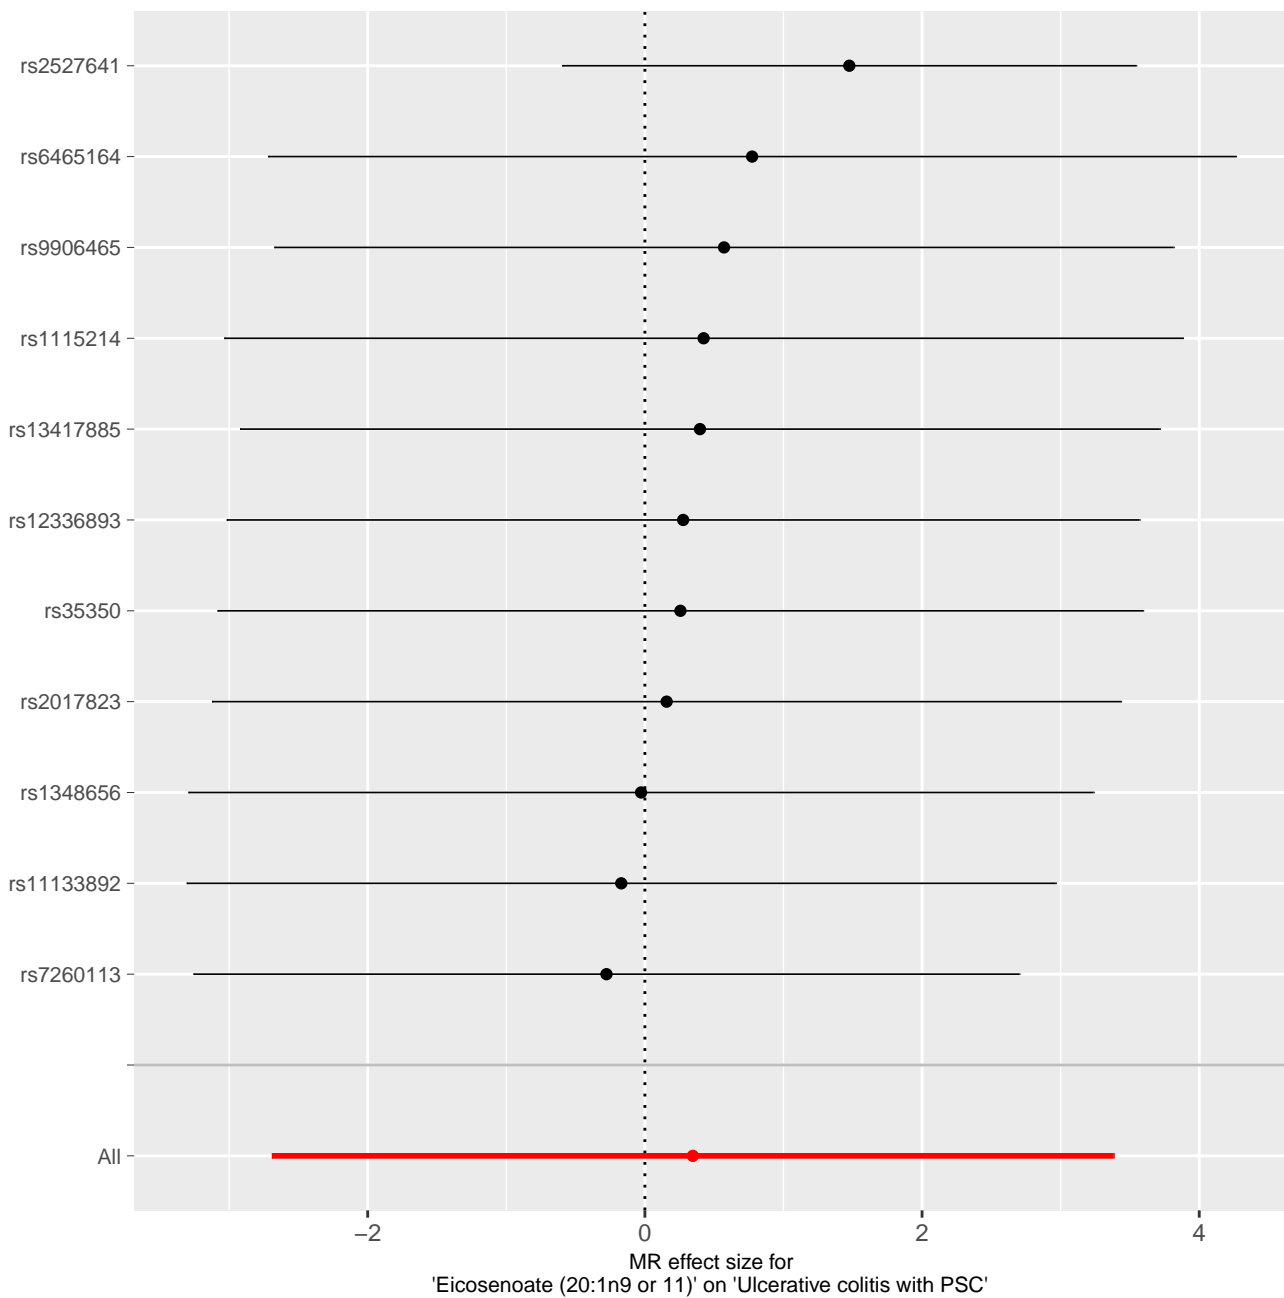

rs6804368

rs7775554

rs8002180

All

MR effect size for  
'X-12244--N-acetylcarnosine' on 'Ulcerative colitis with PSC'

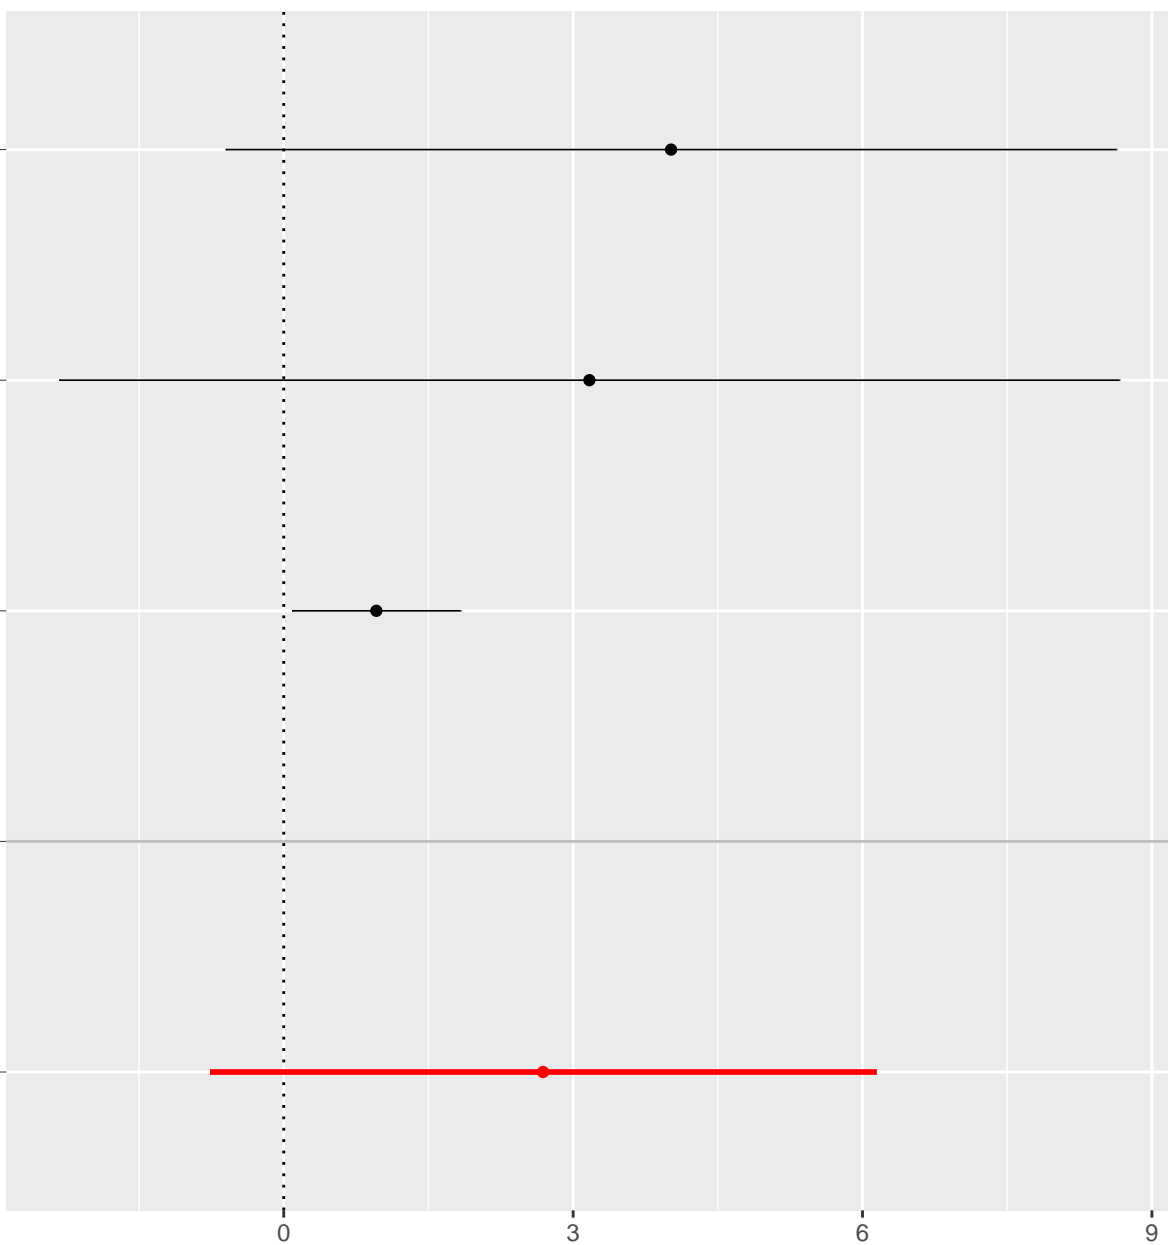

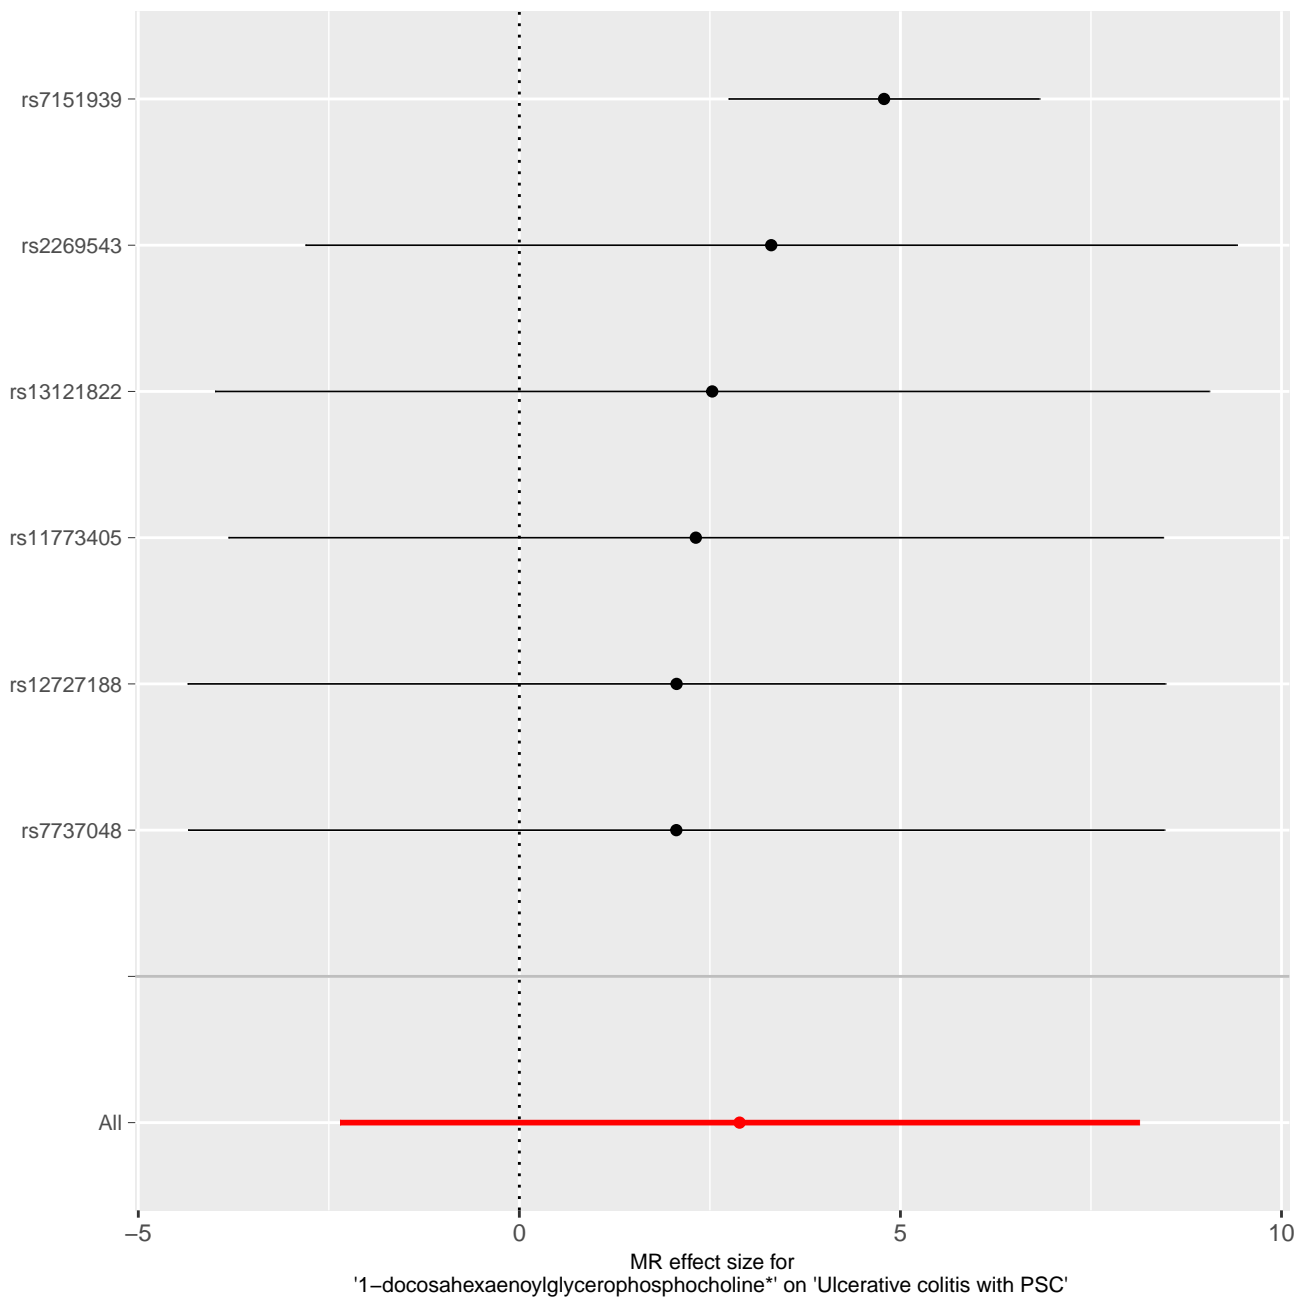

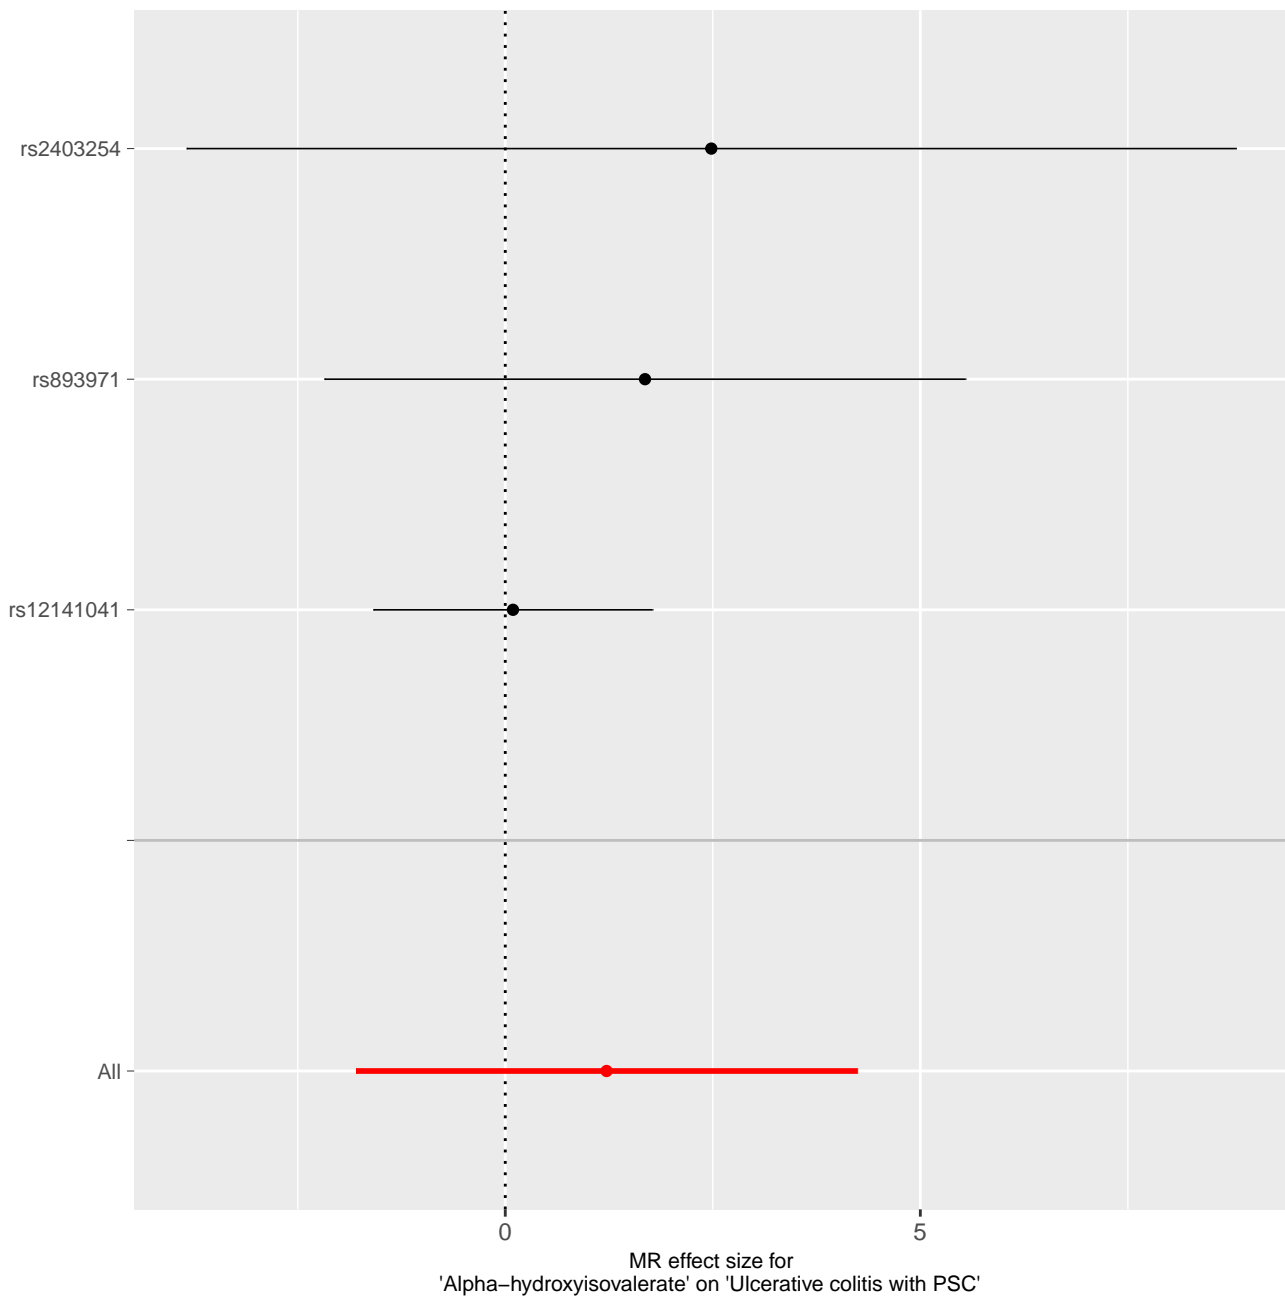

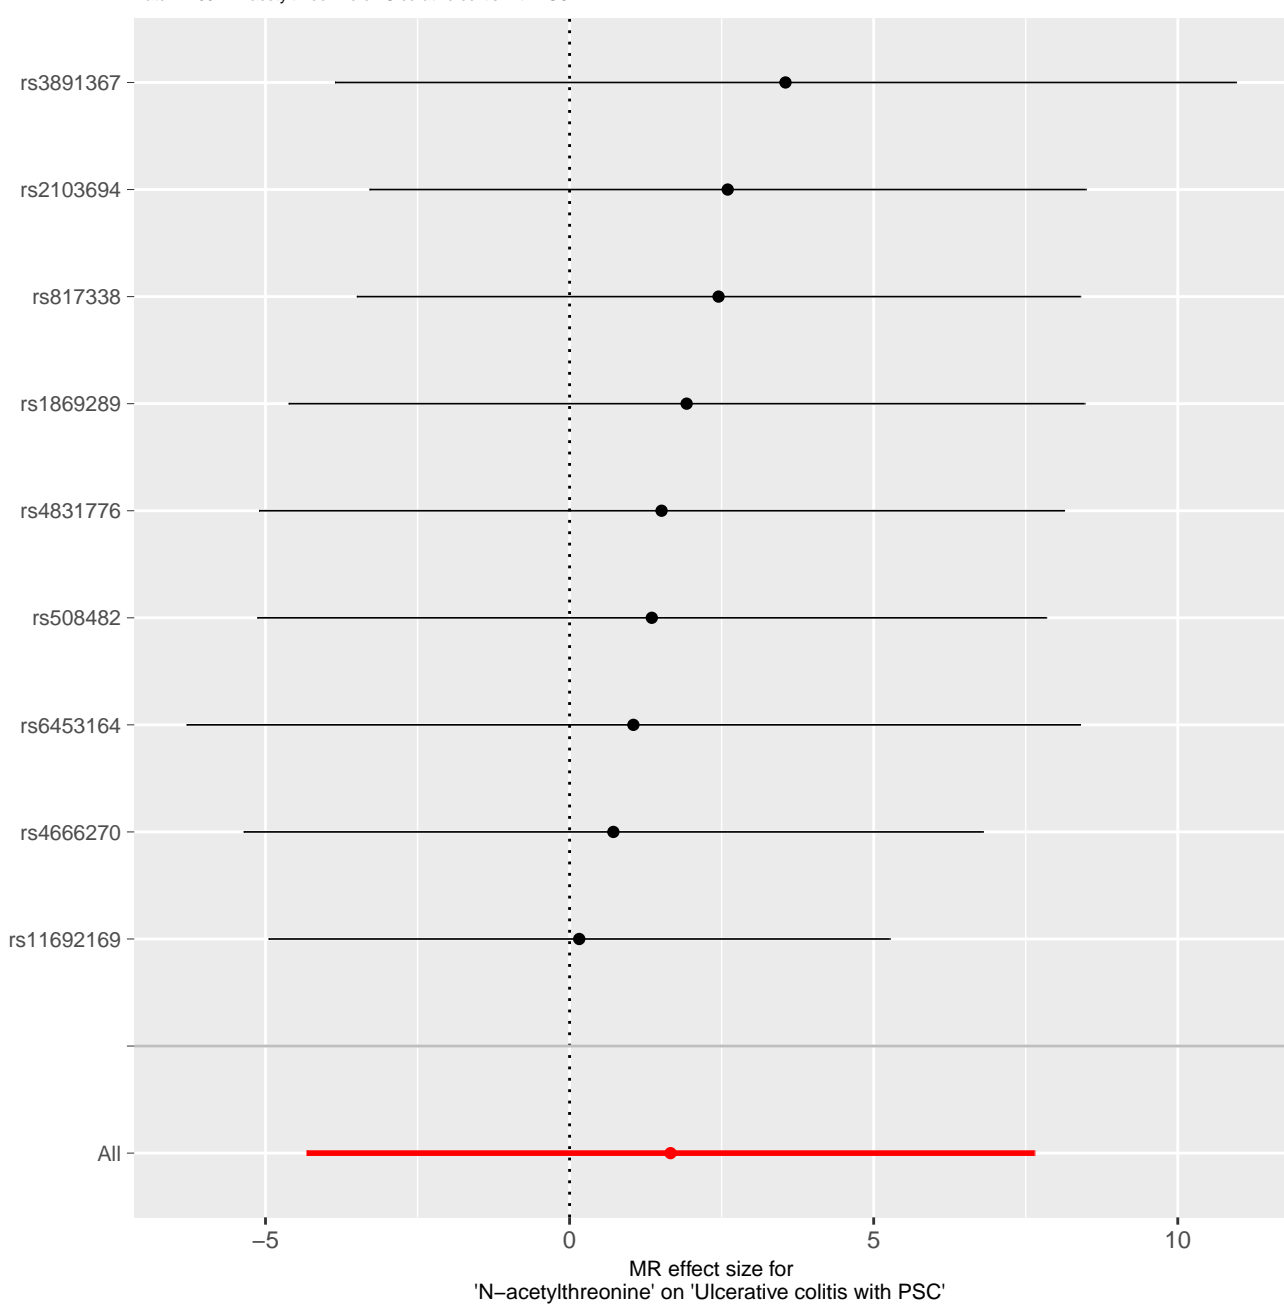



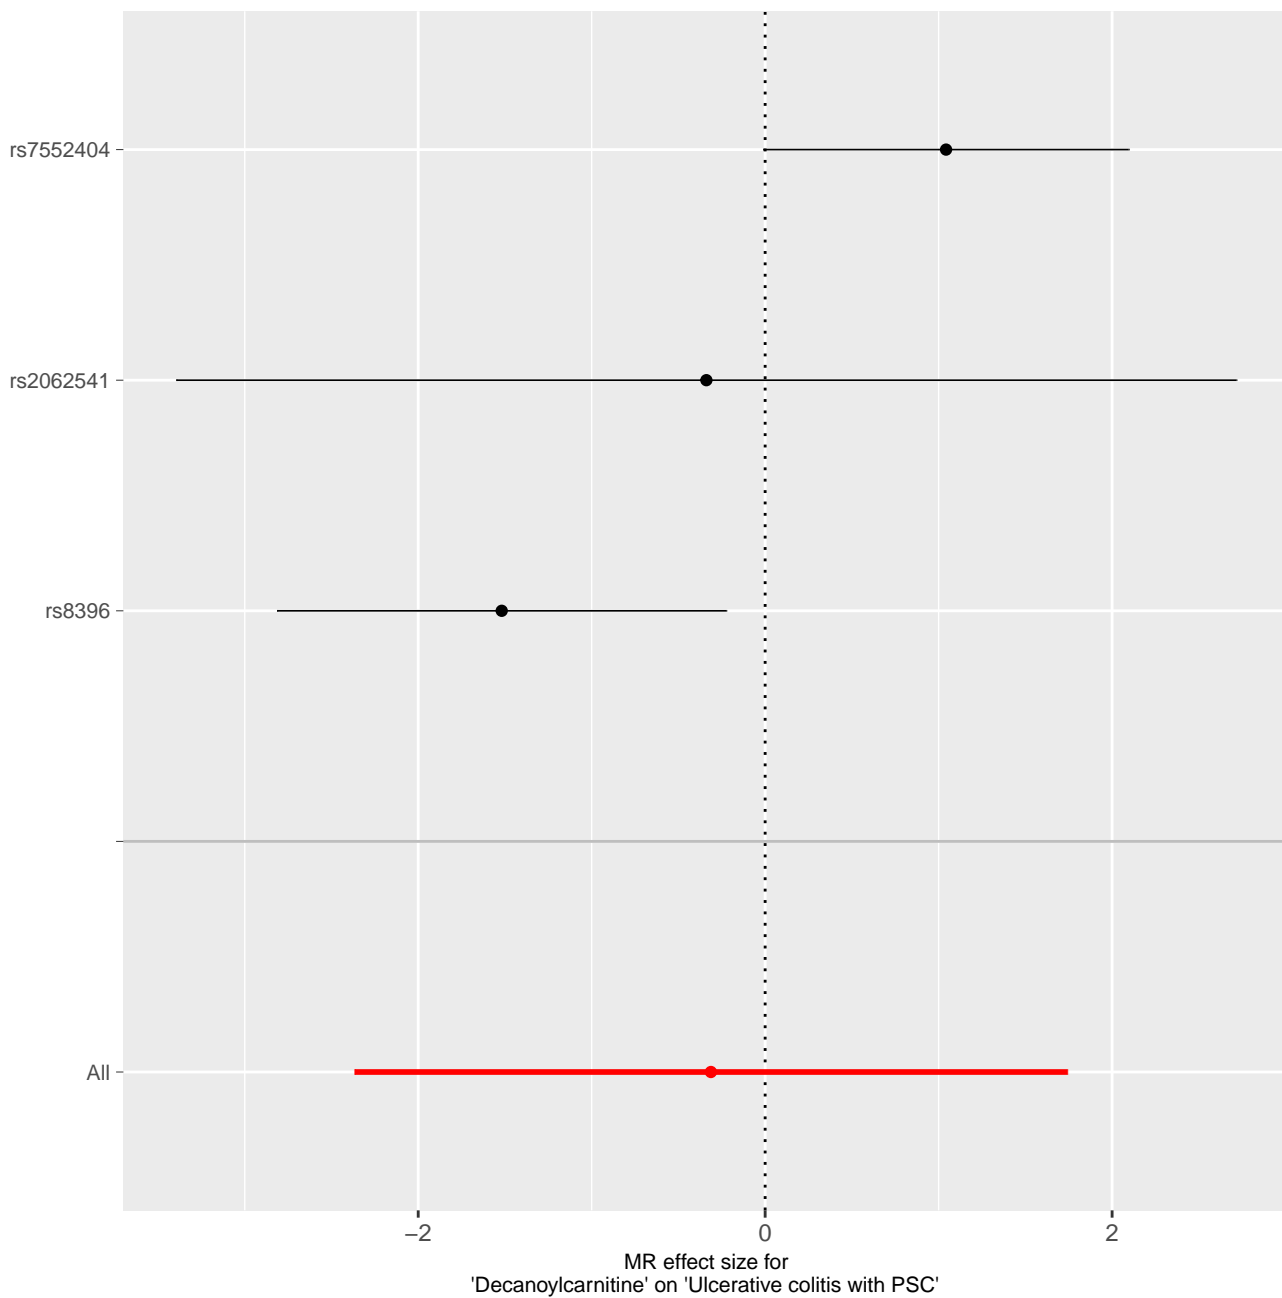

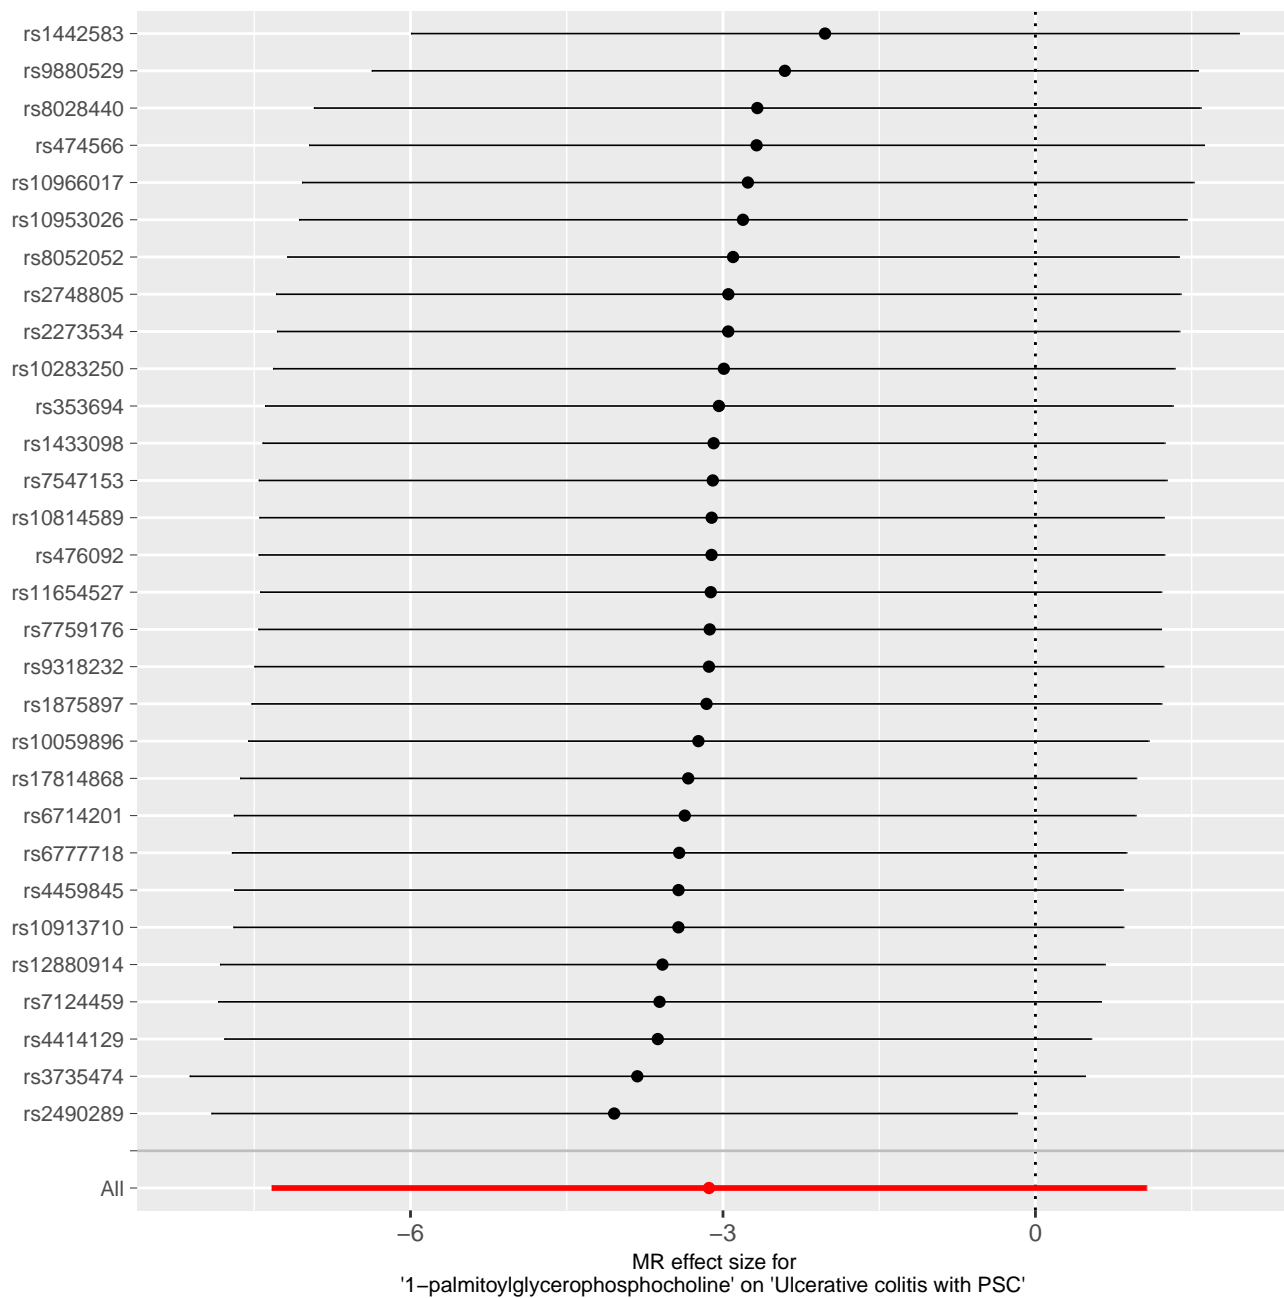

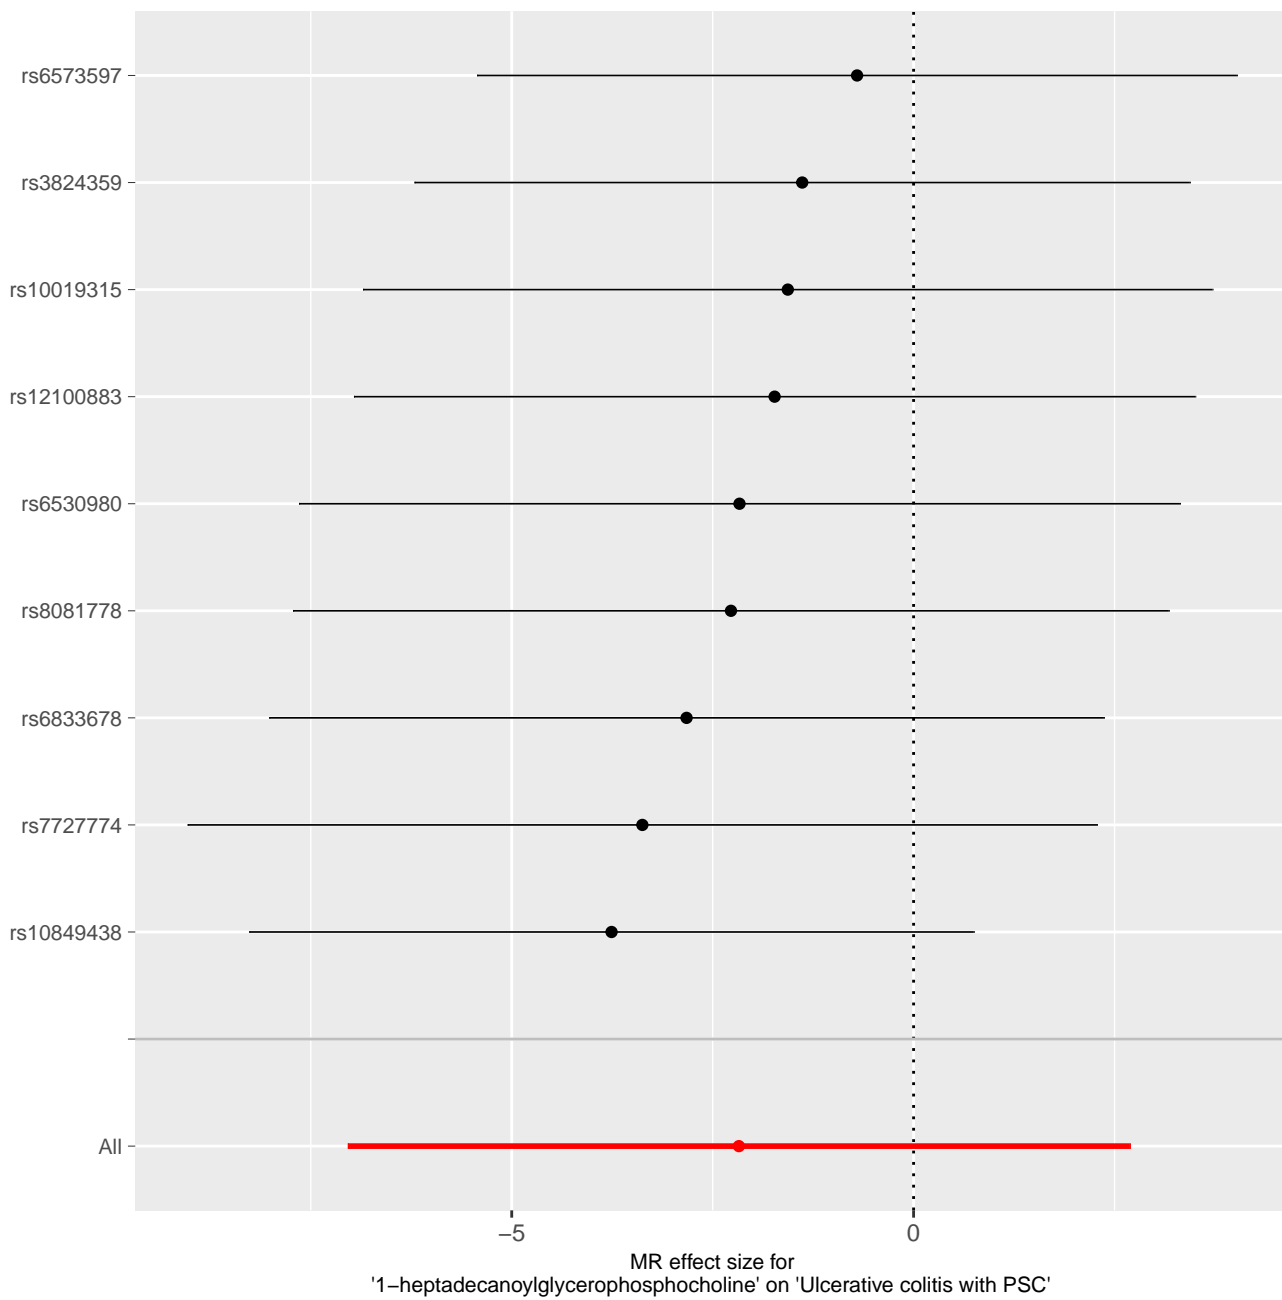

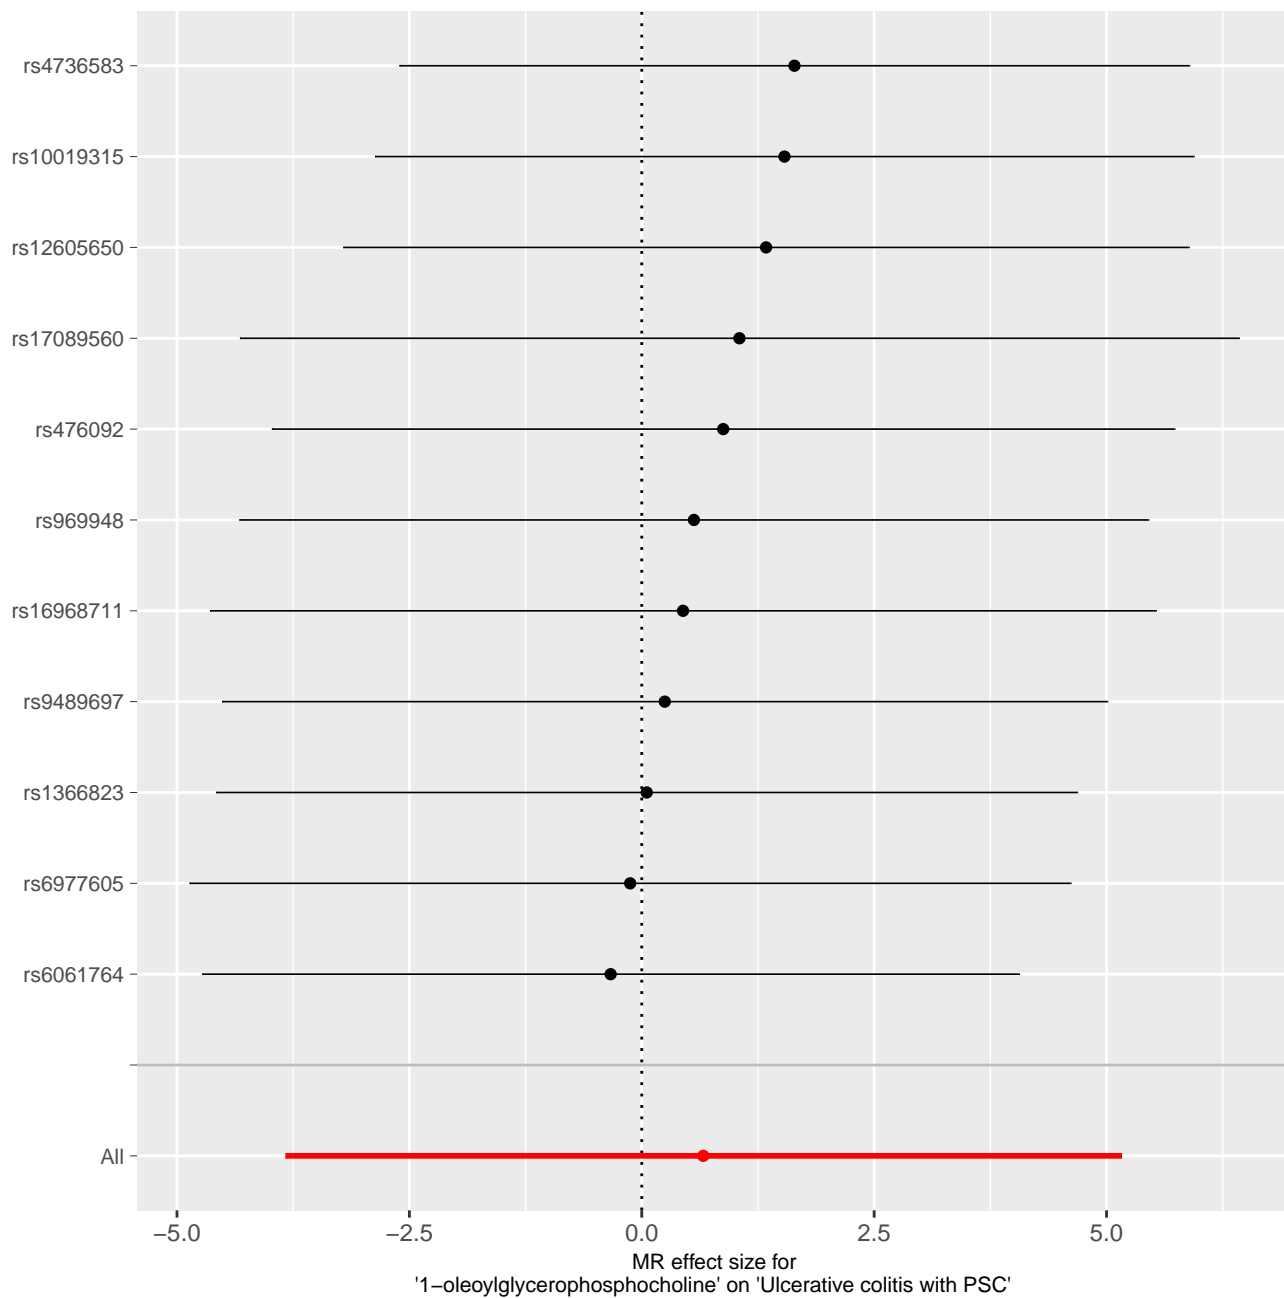

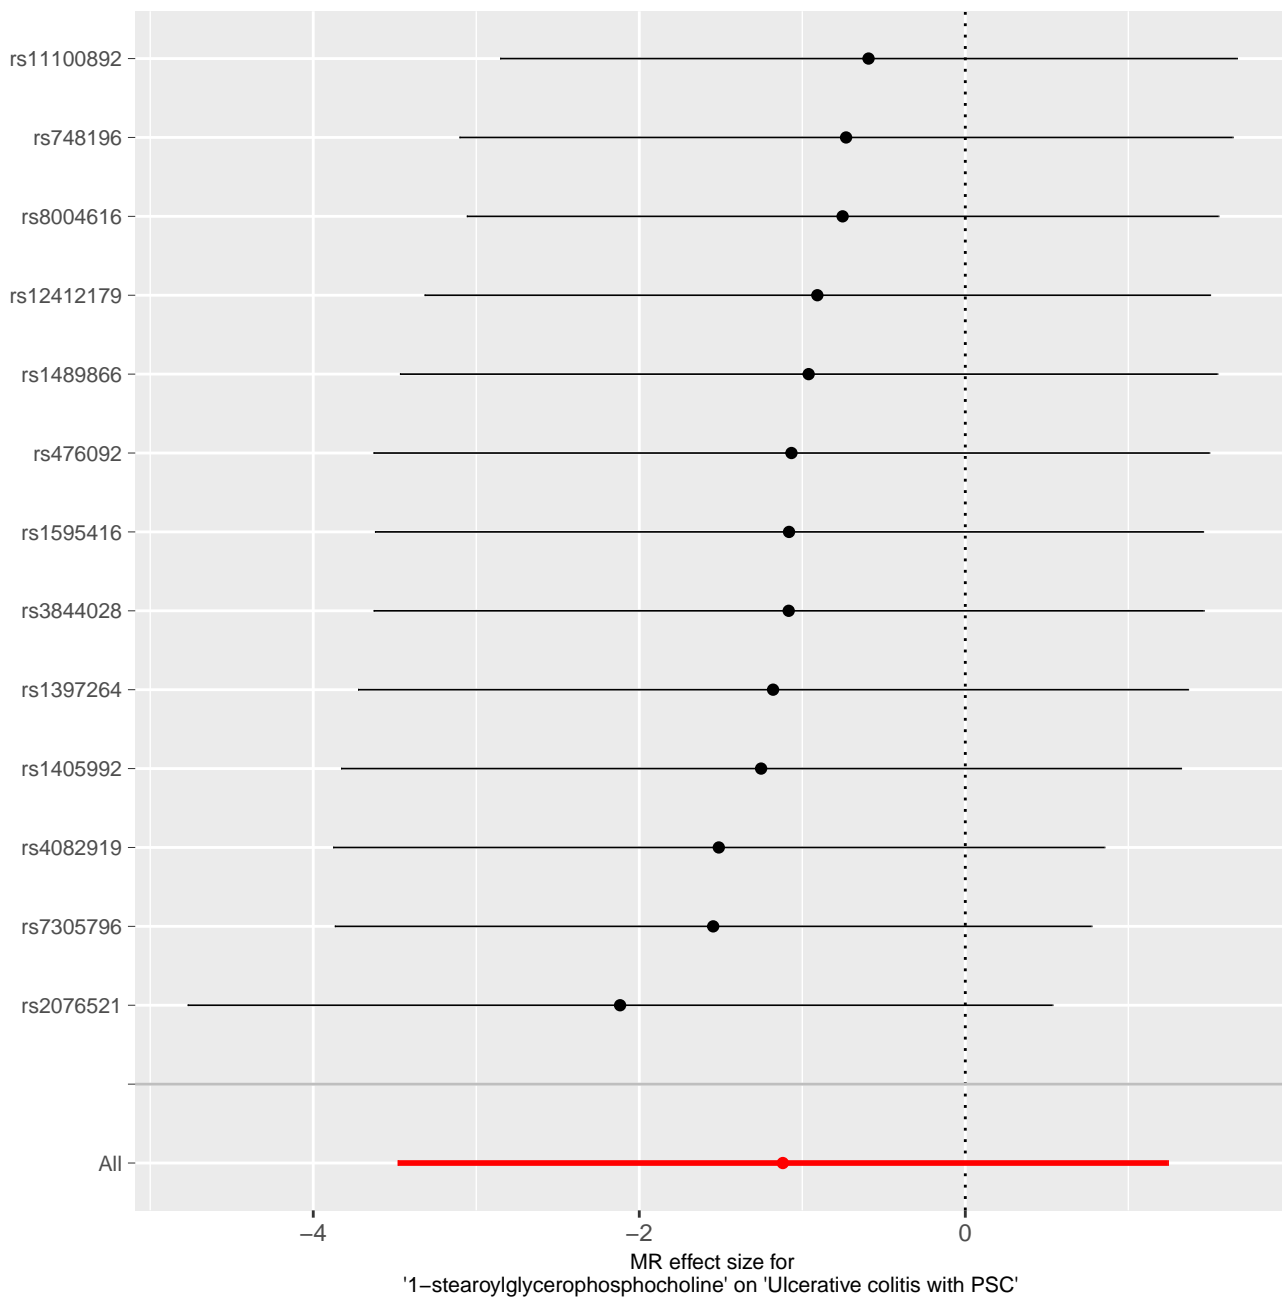

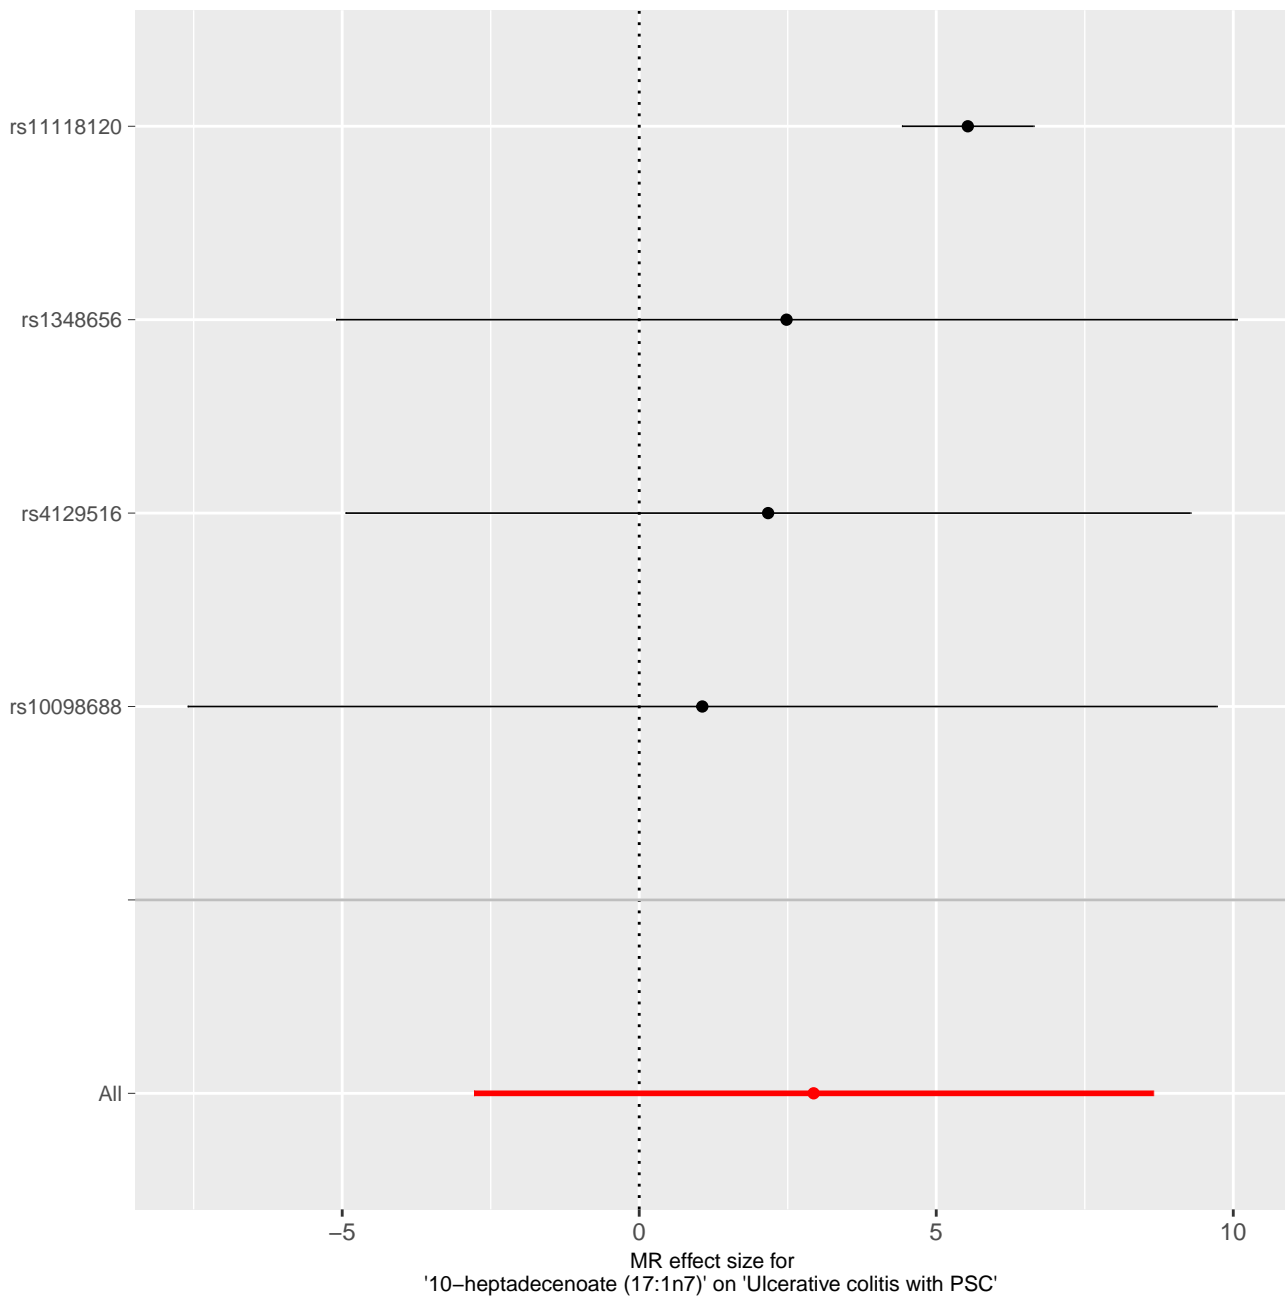

rs1034879

rs2242415

rs1348656

All

MR effect size for  
'Linolenate [alpha or gamma; (18:3n3 or 6)]' on 'Ulcerative colitis with PSC'

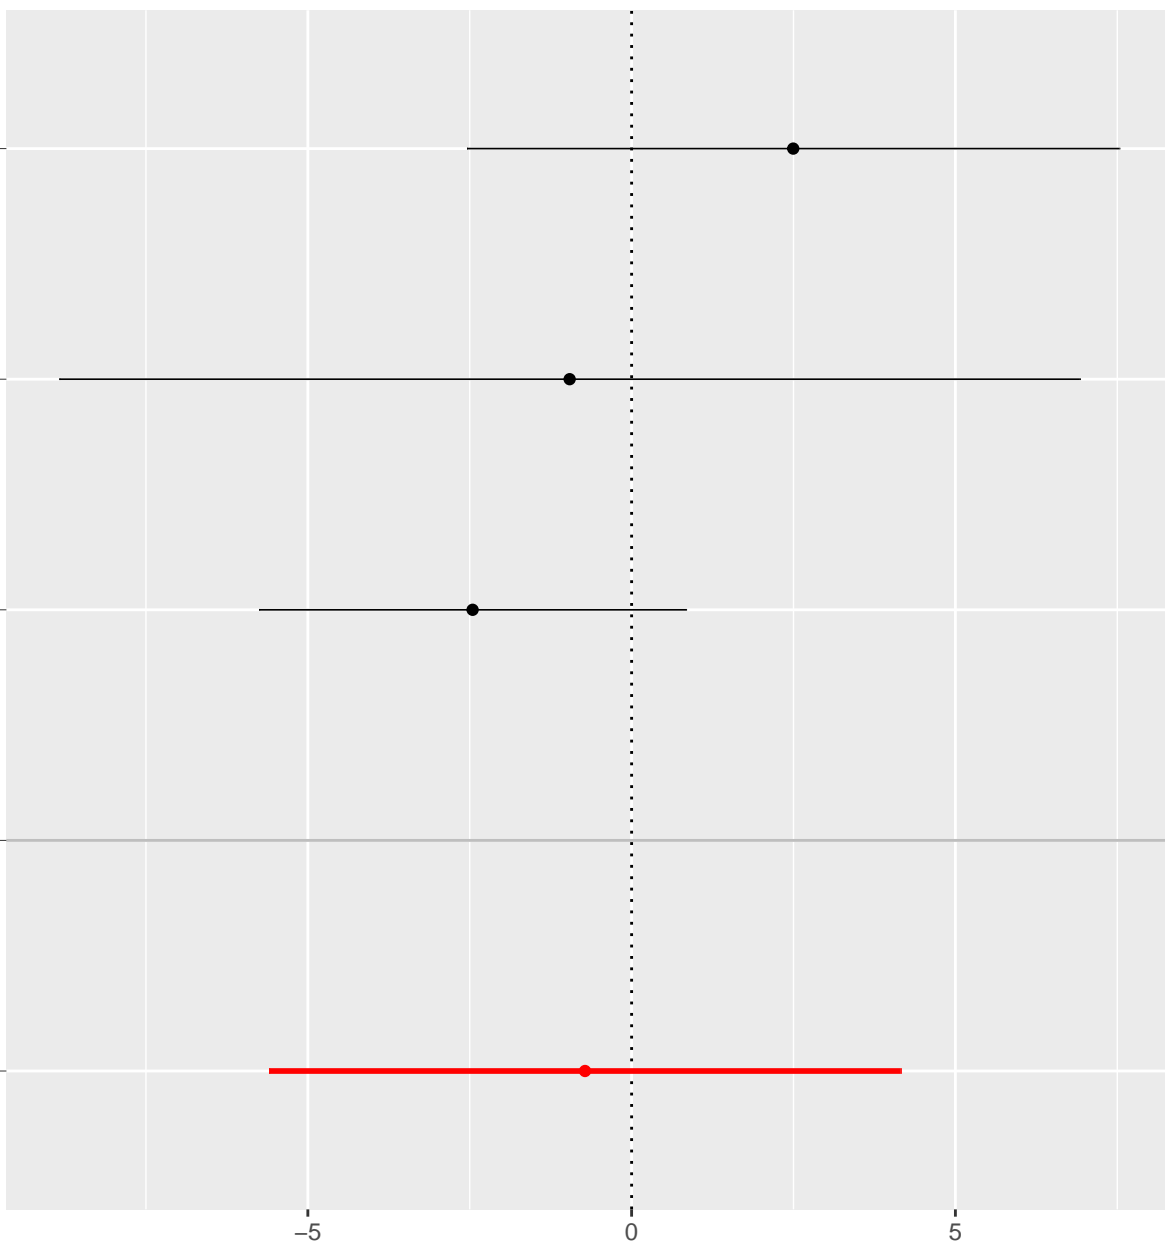

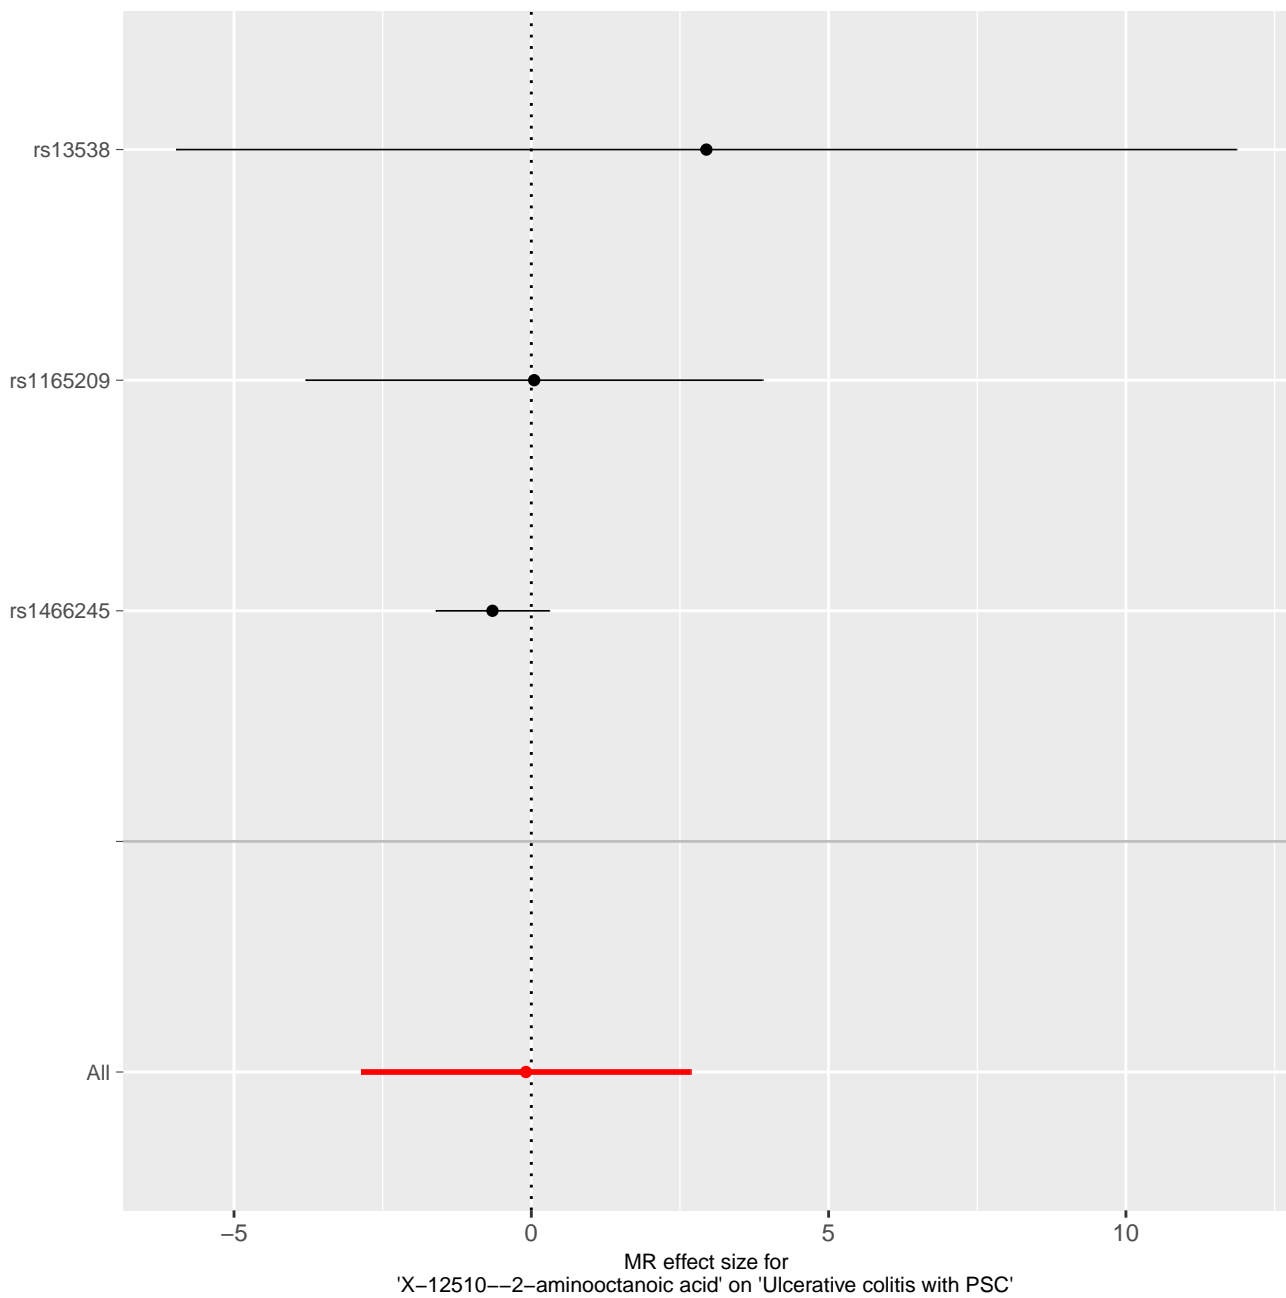



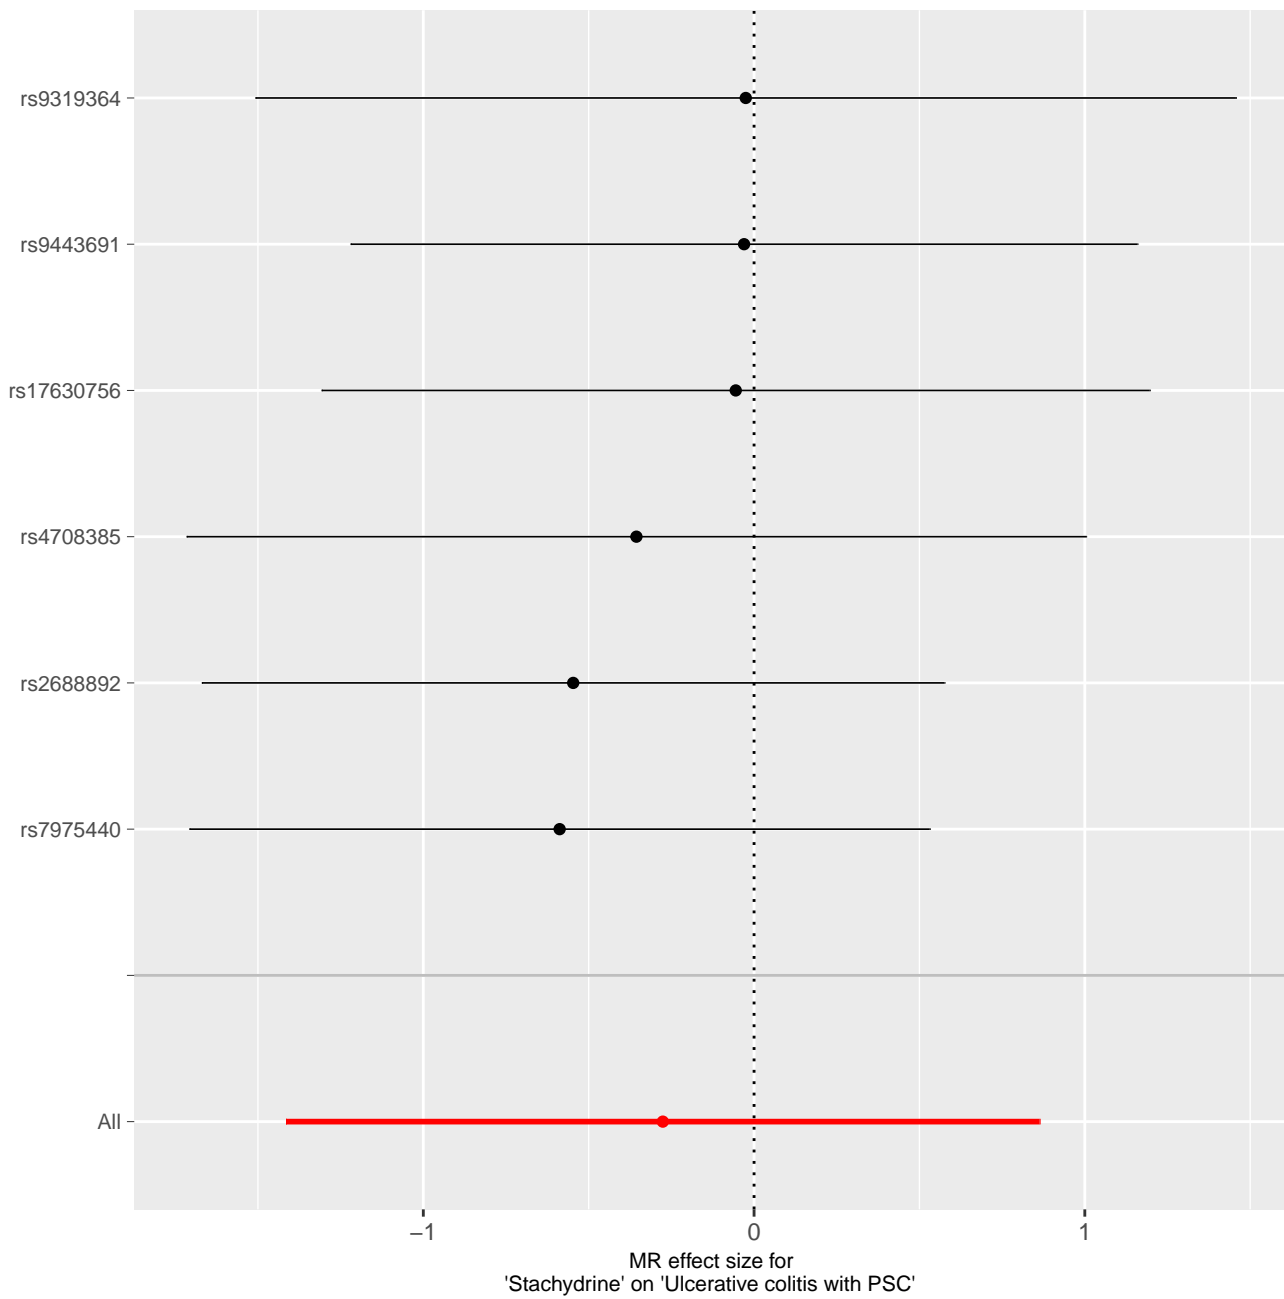

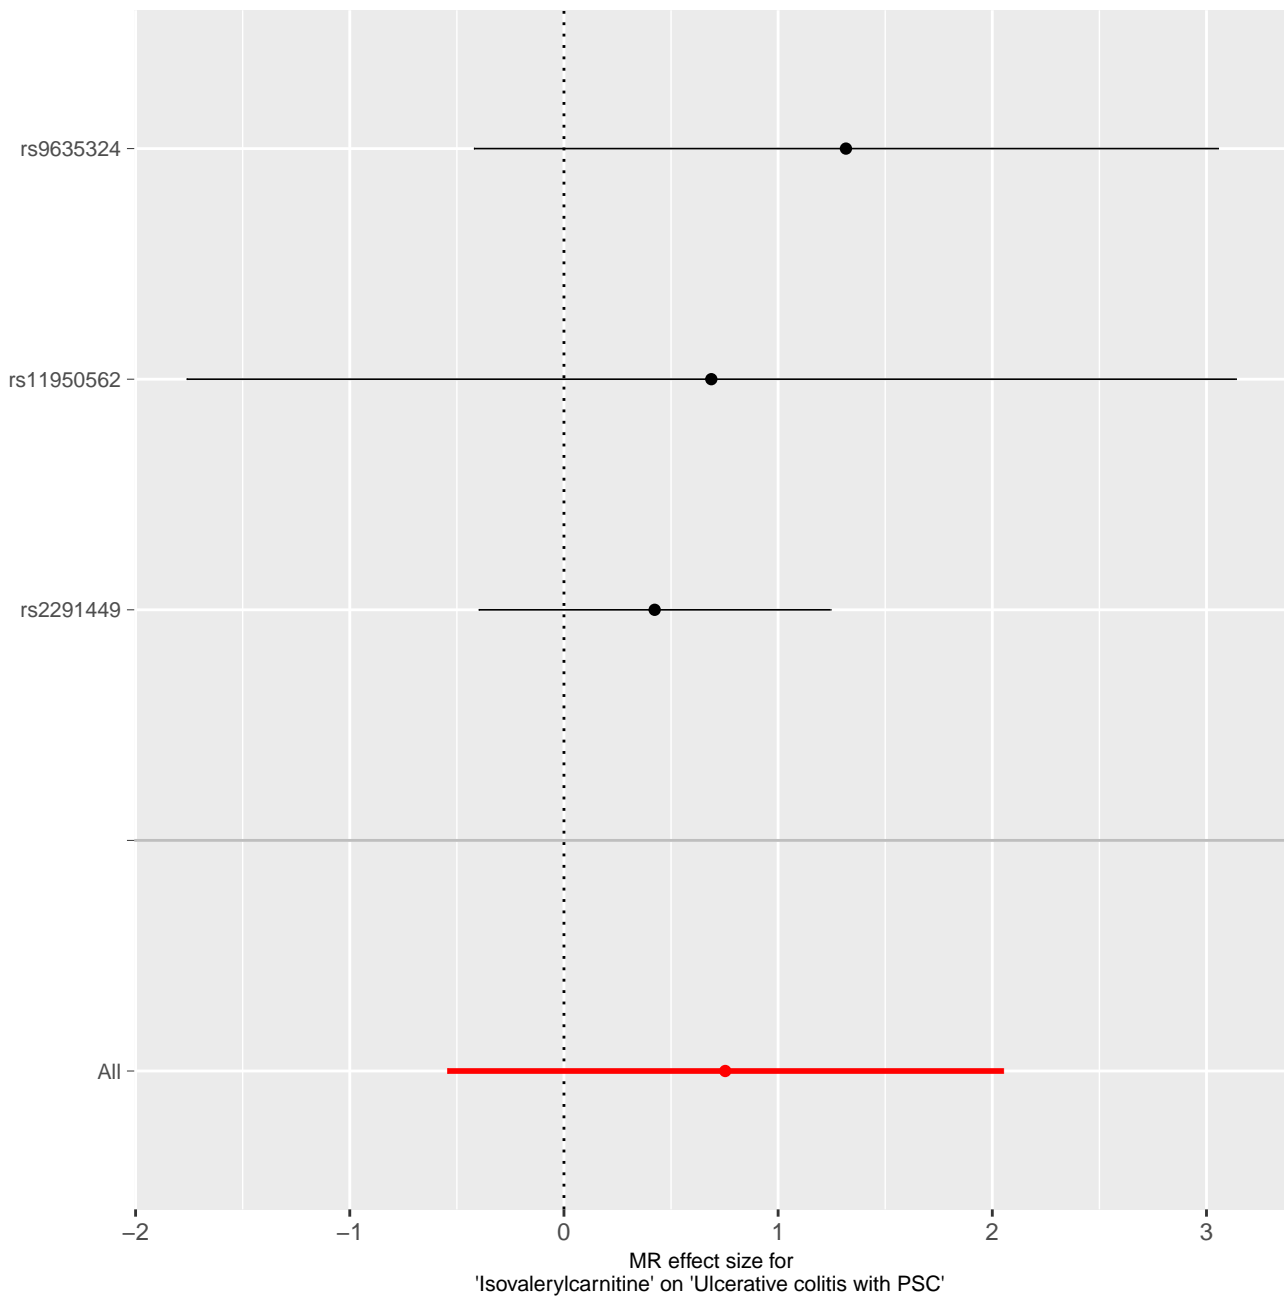

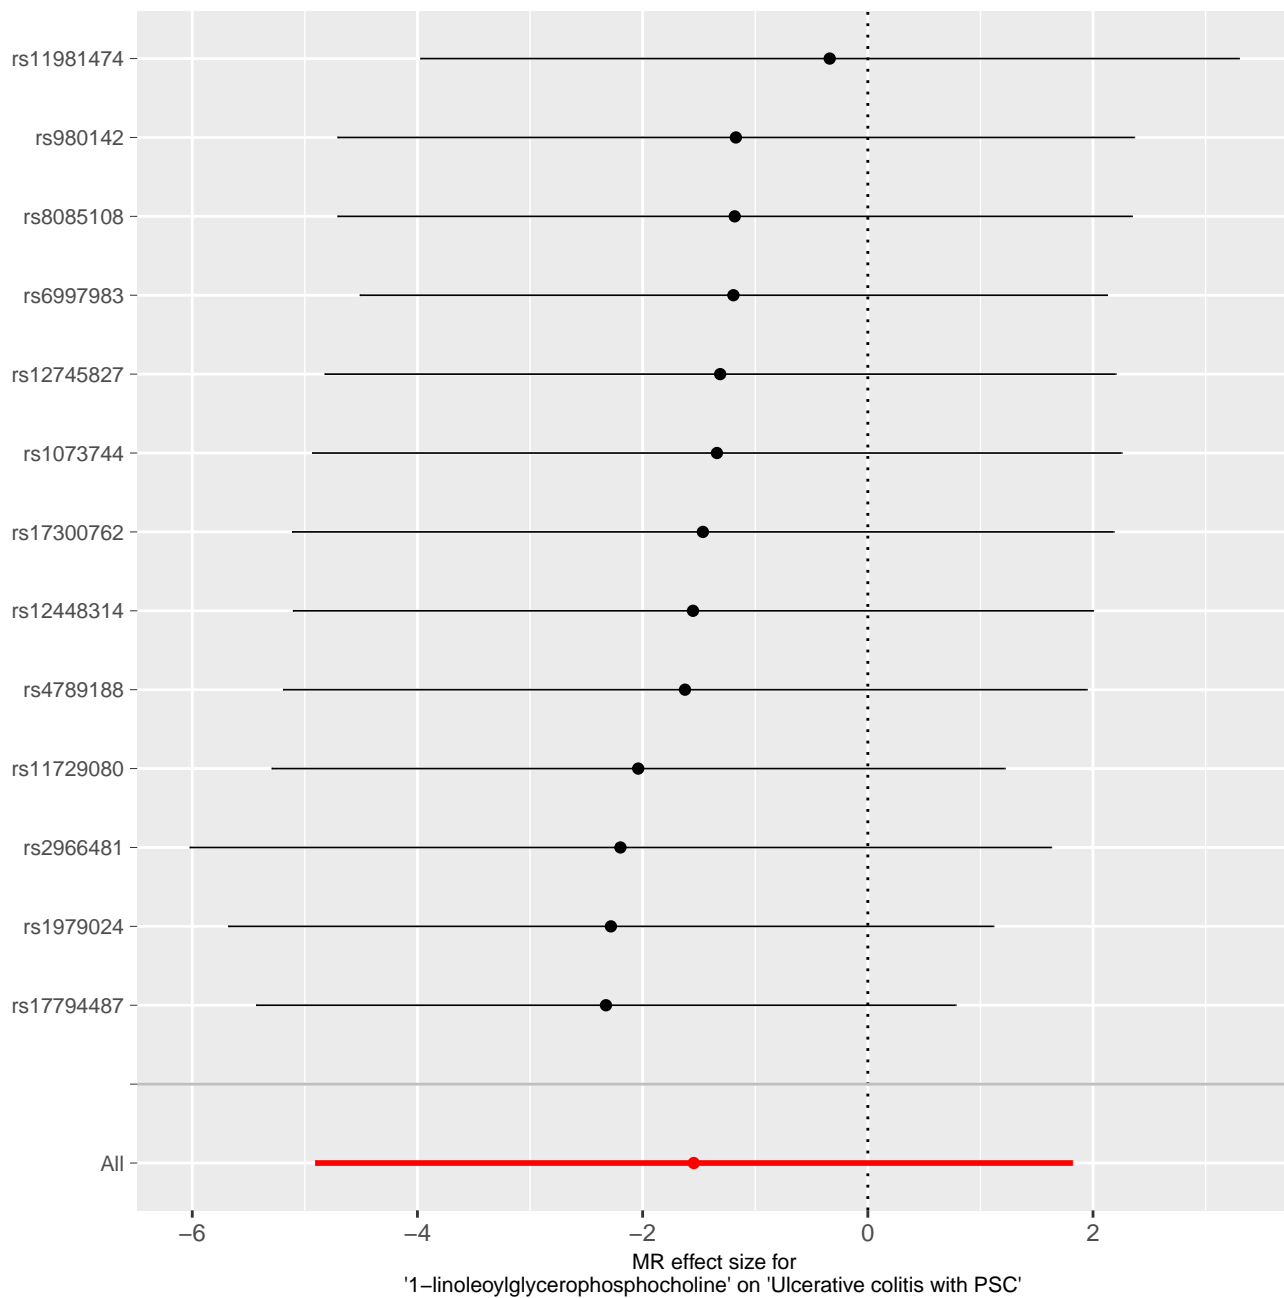

rs2731672

rs5030062

rs4253311

All

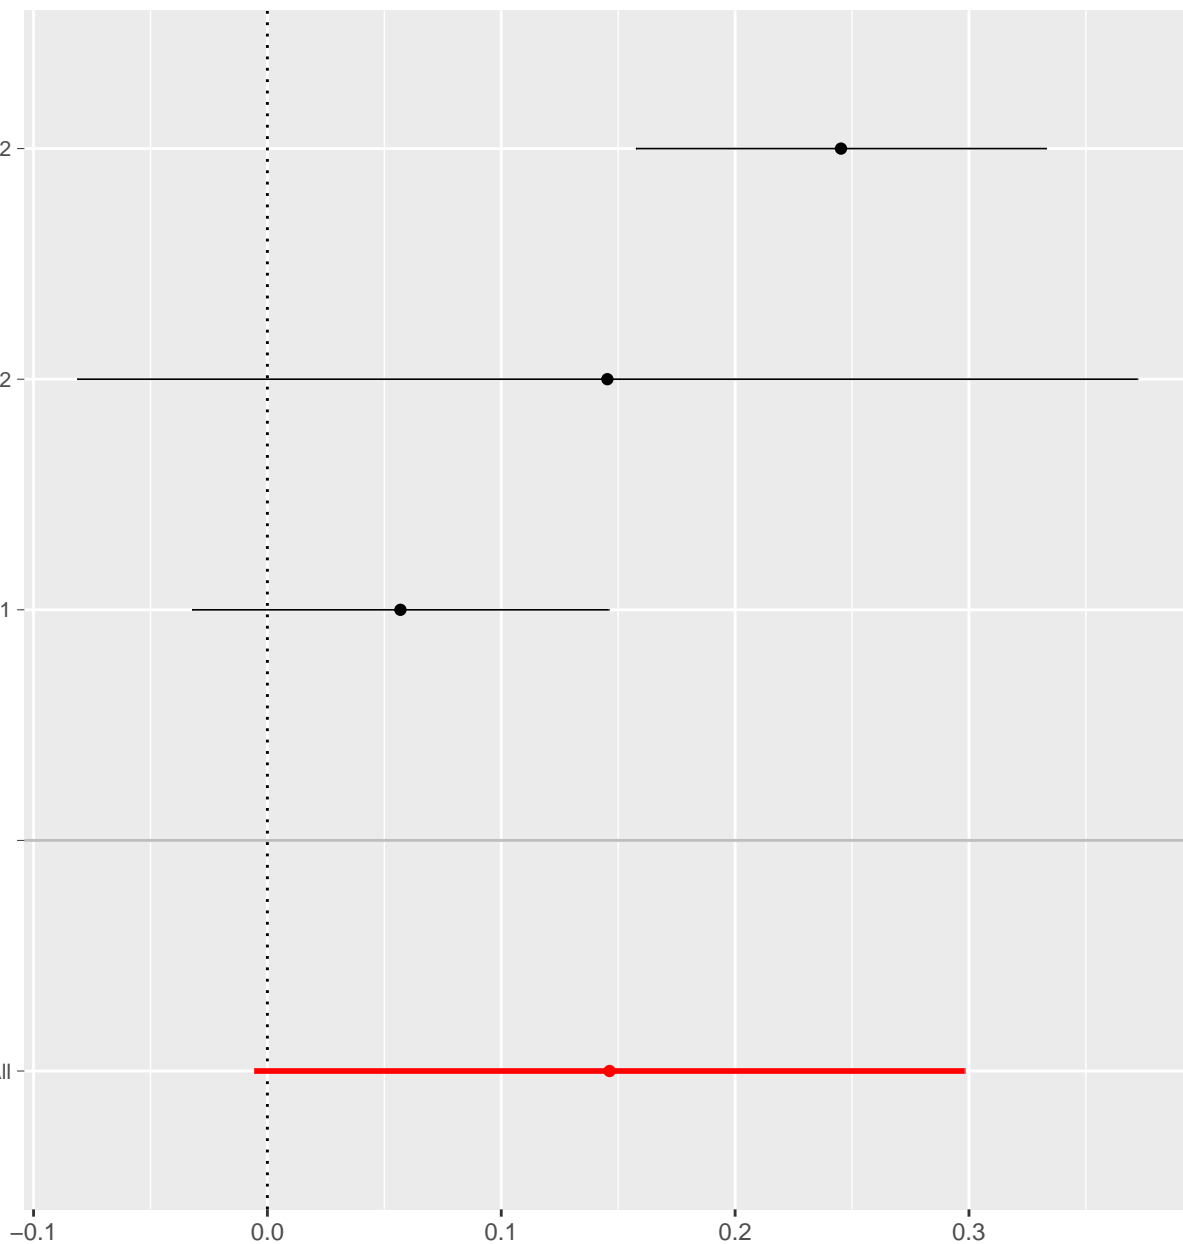

MR effect size for  
'Bradykinin, des-arg(9)' on 'Ulcerative colitis with PSC'

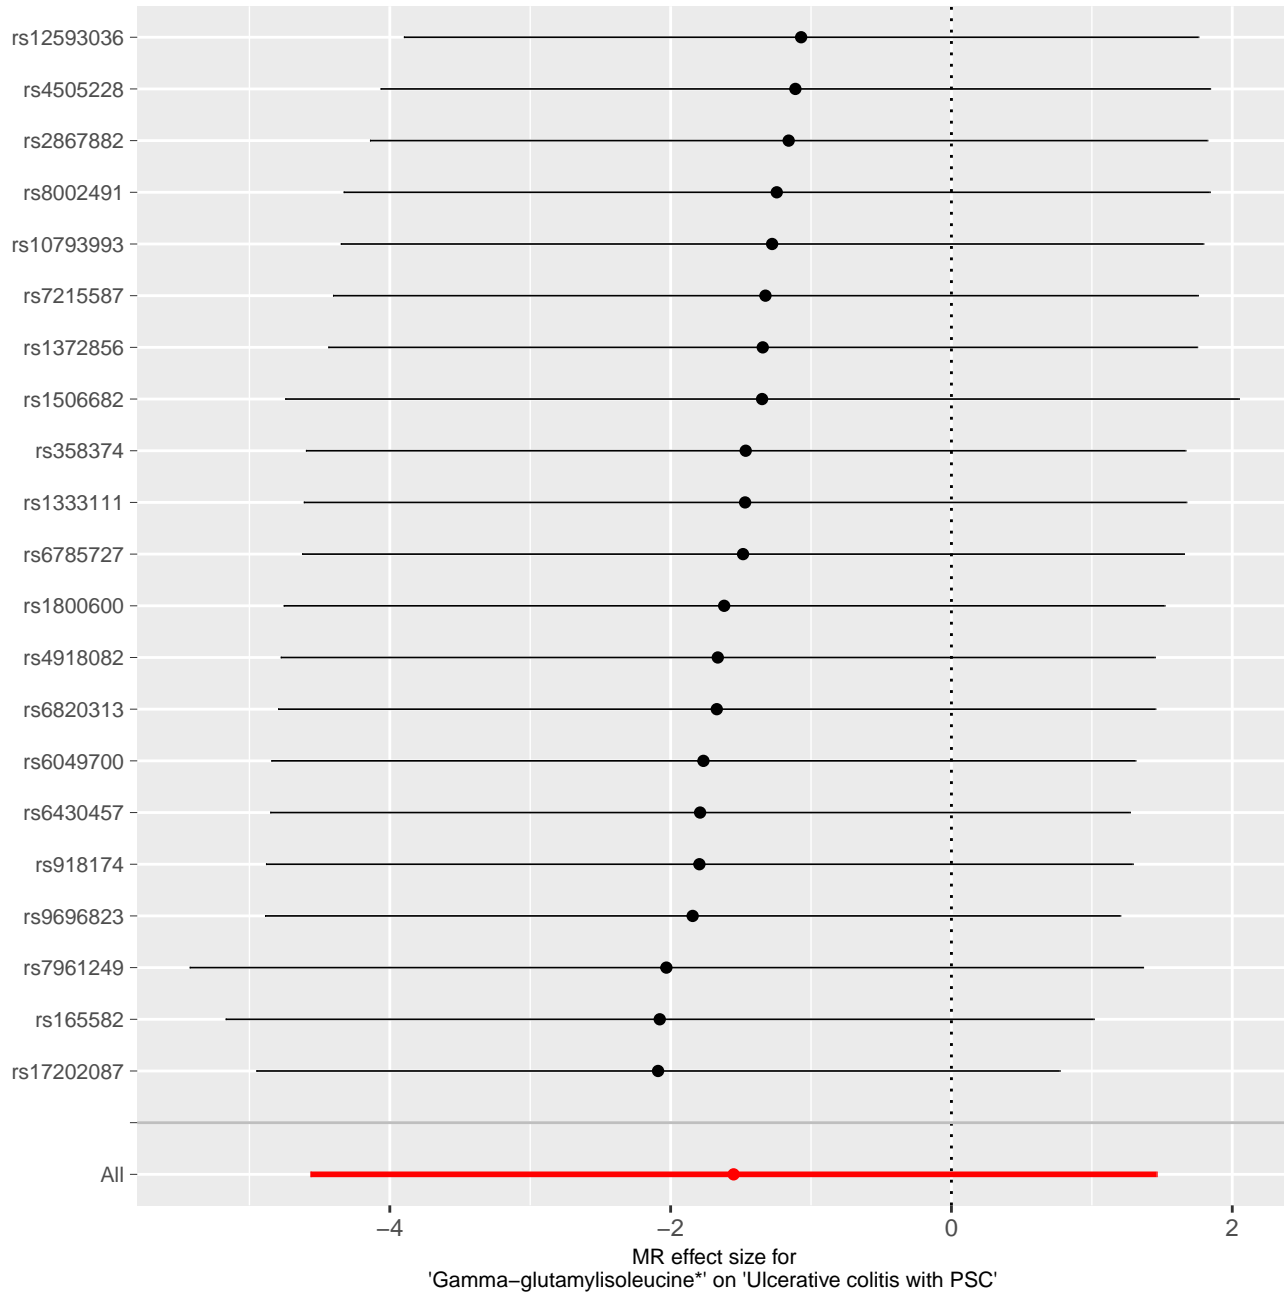

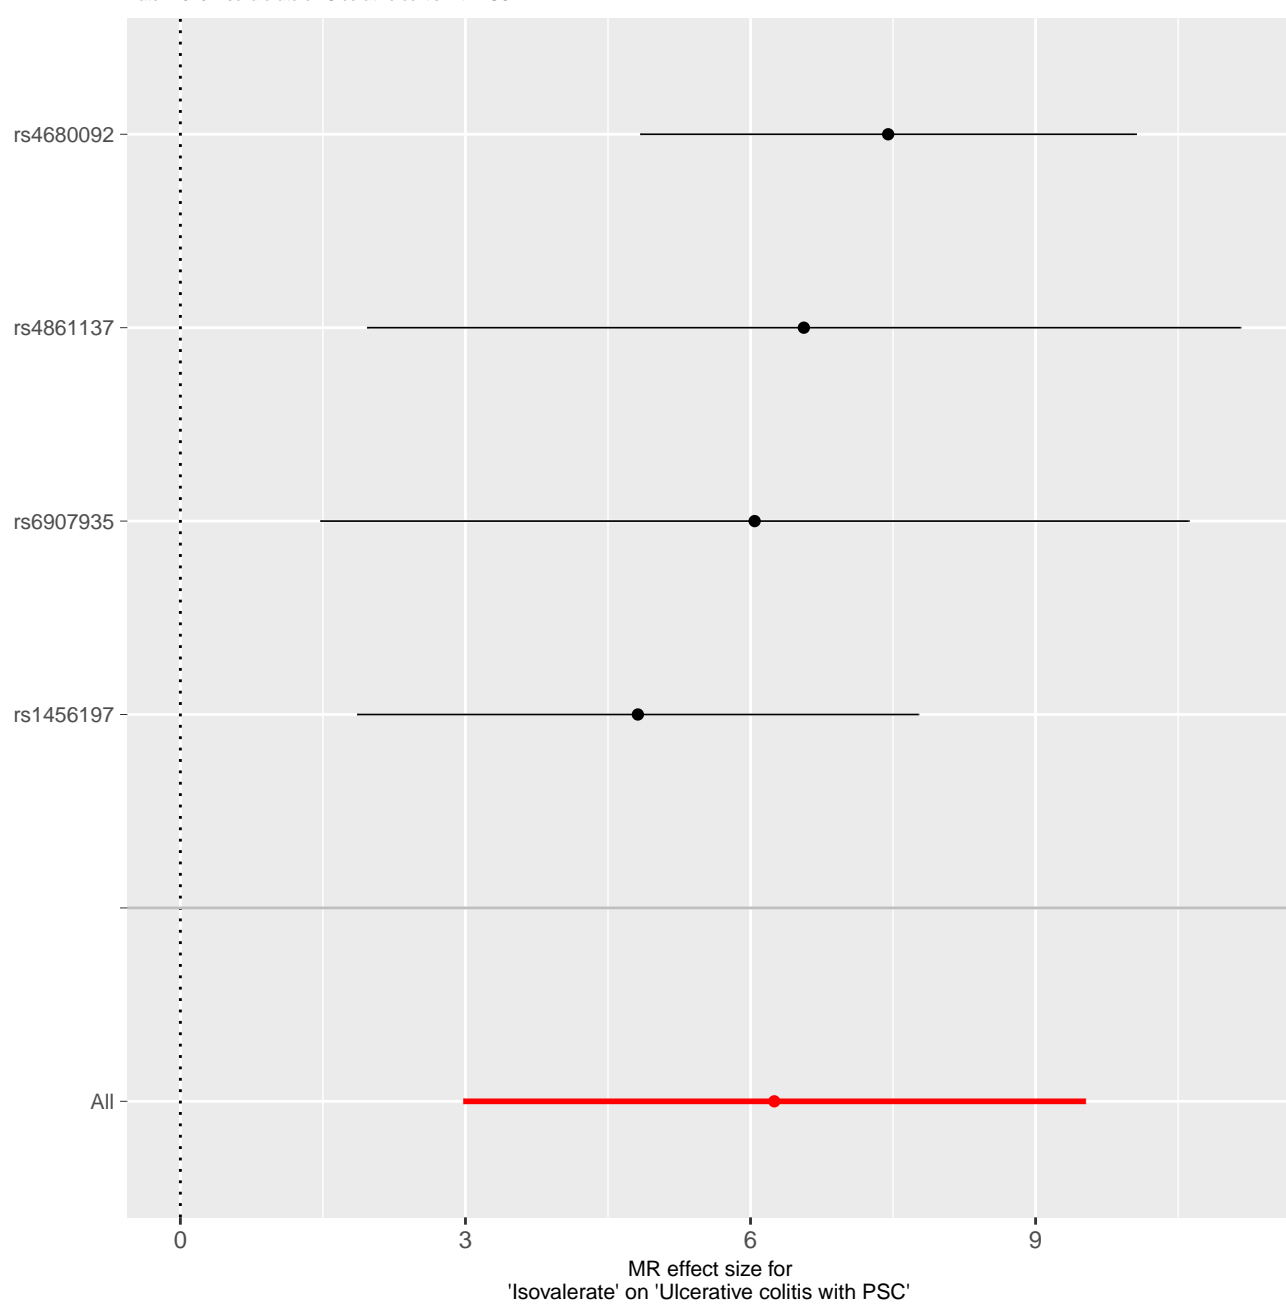

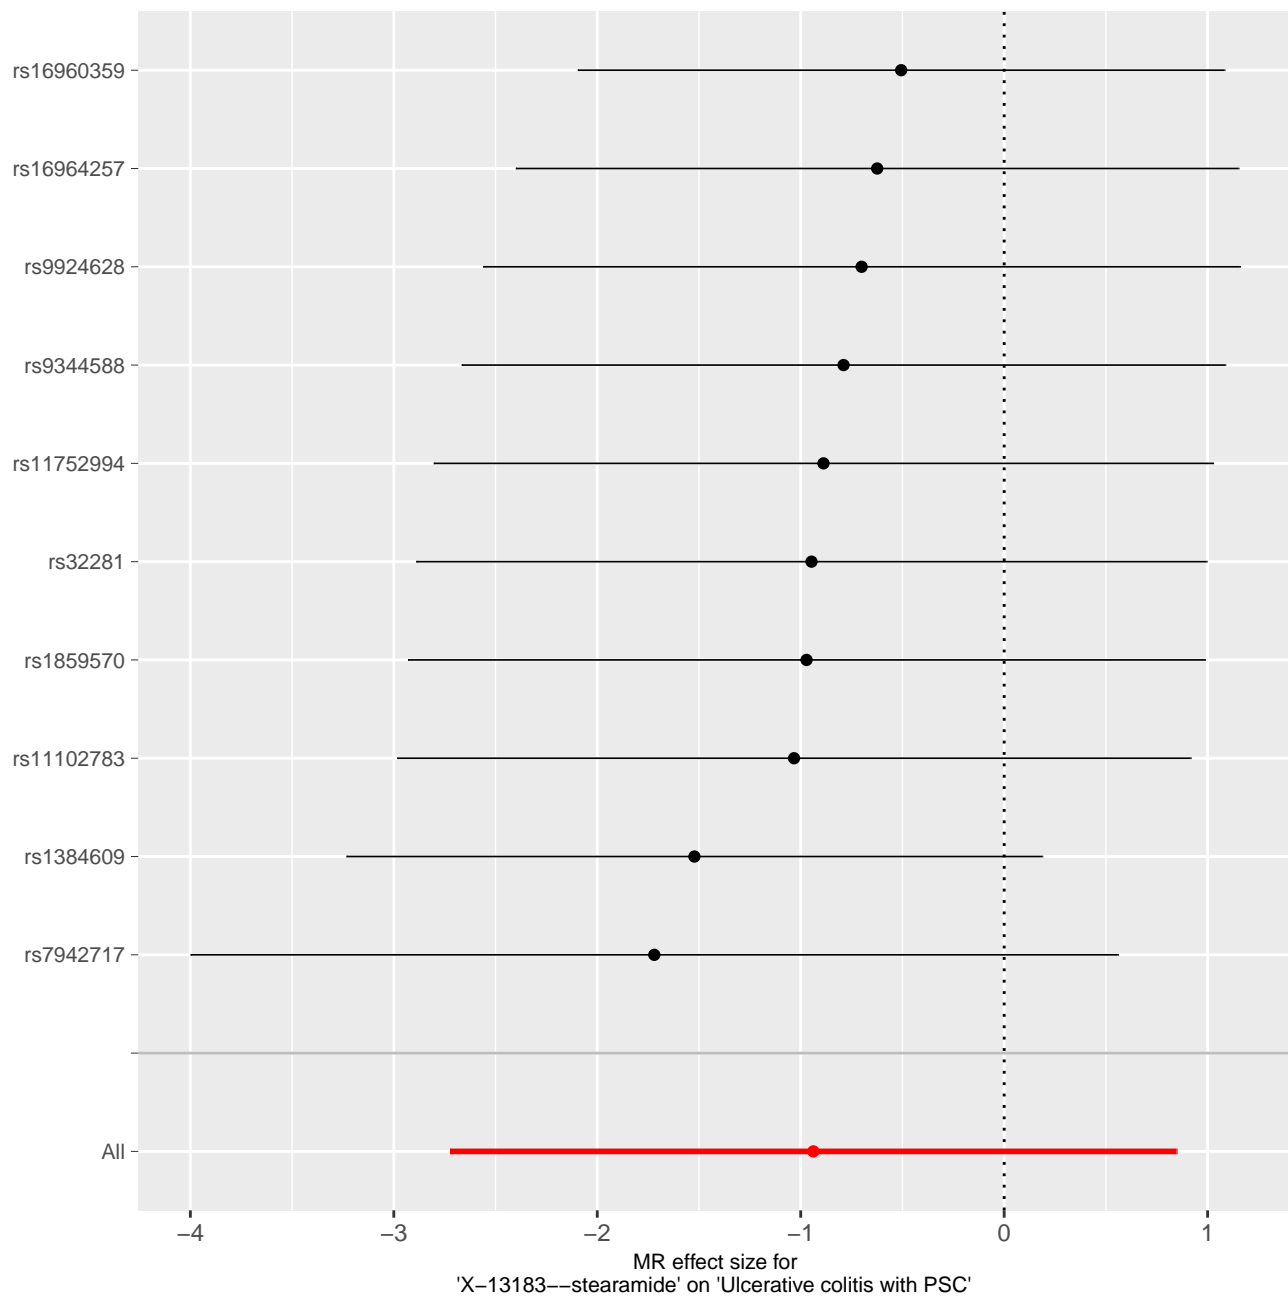

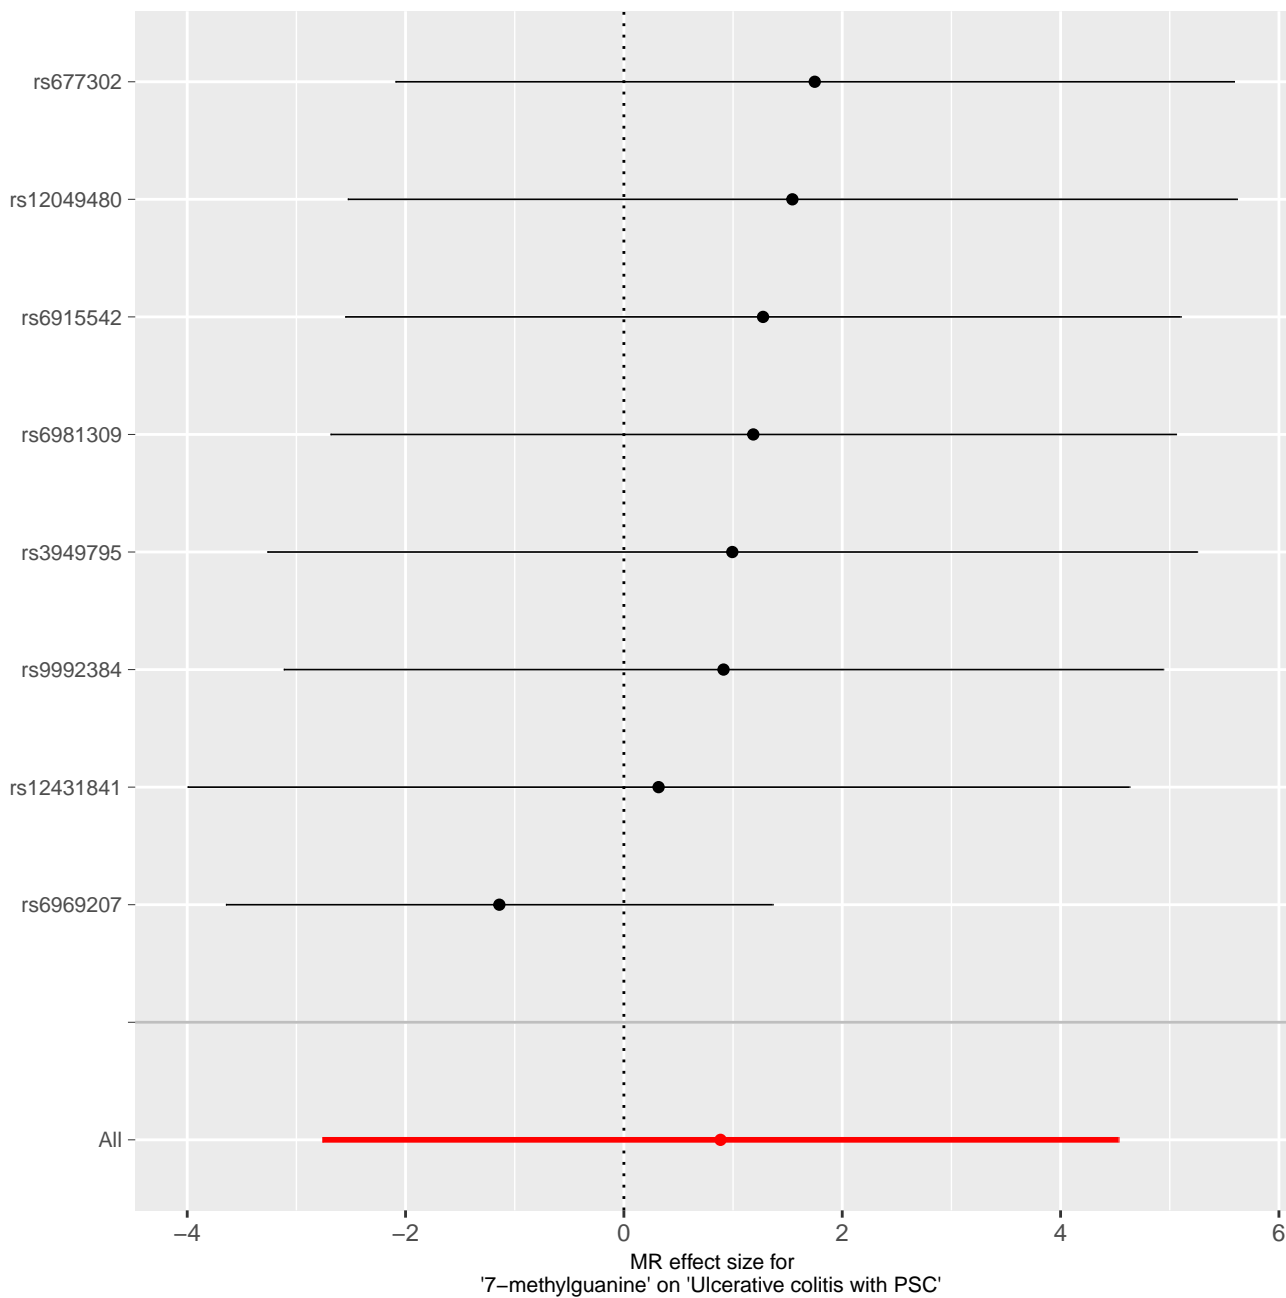



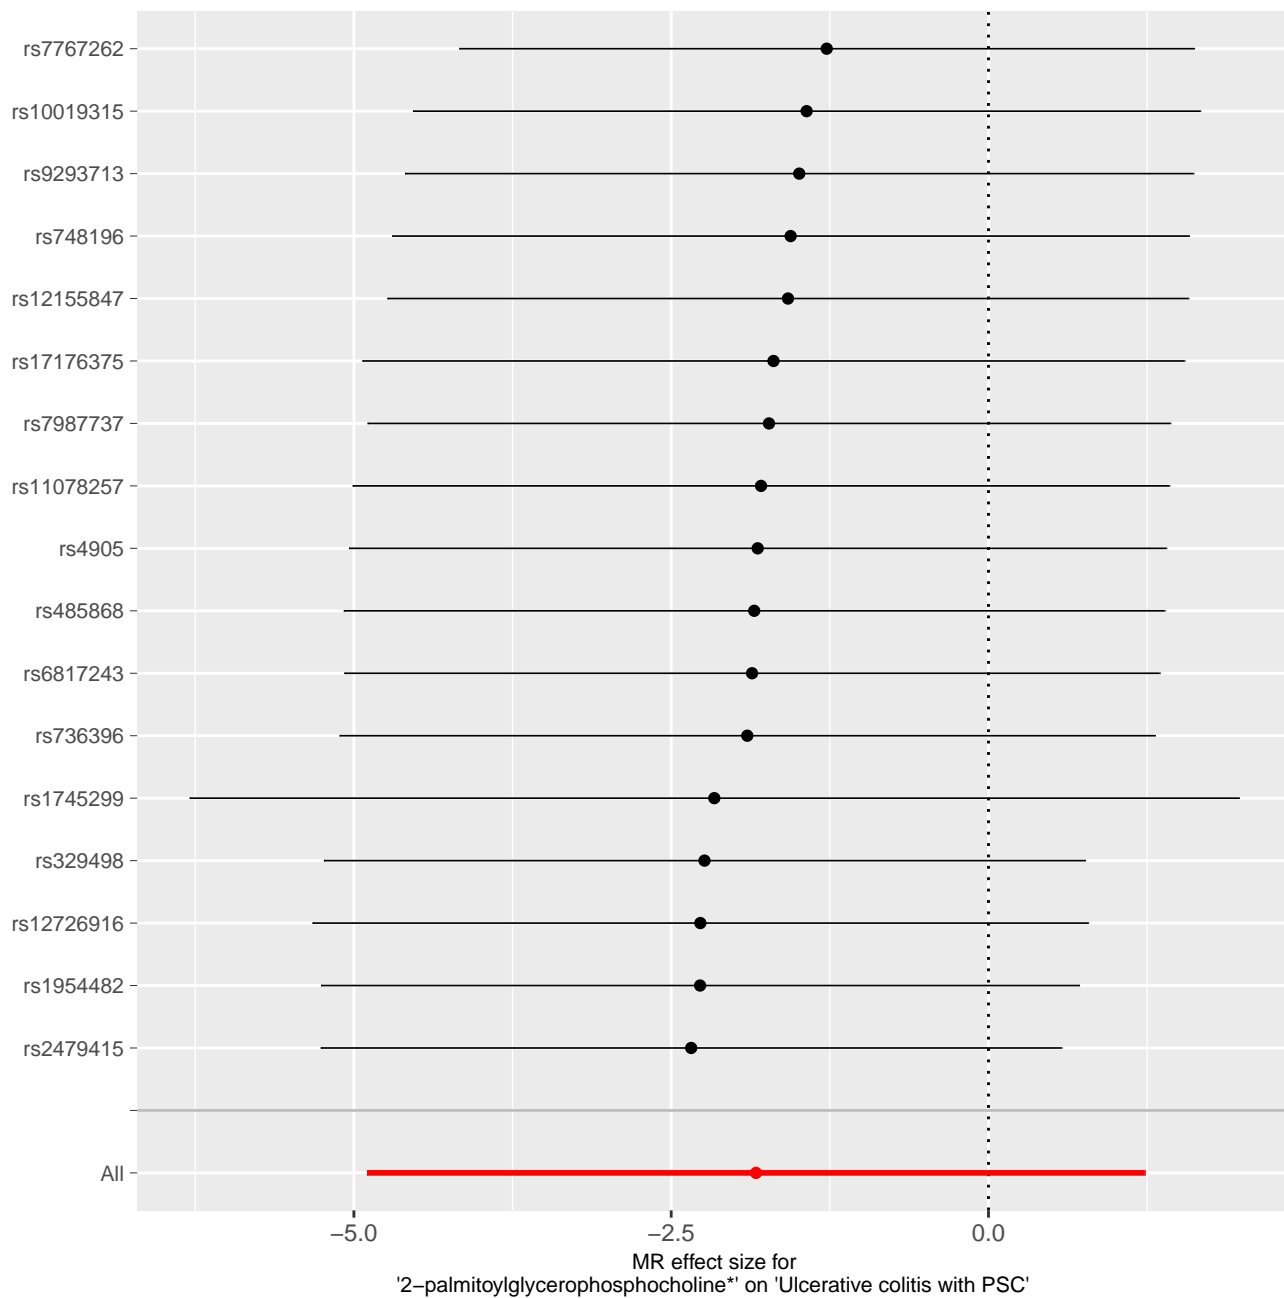

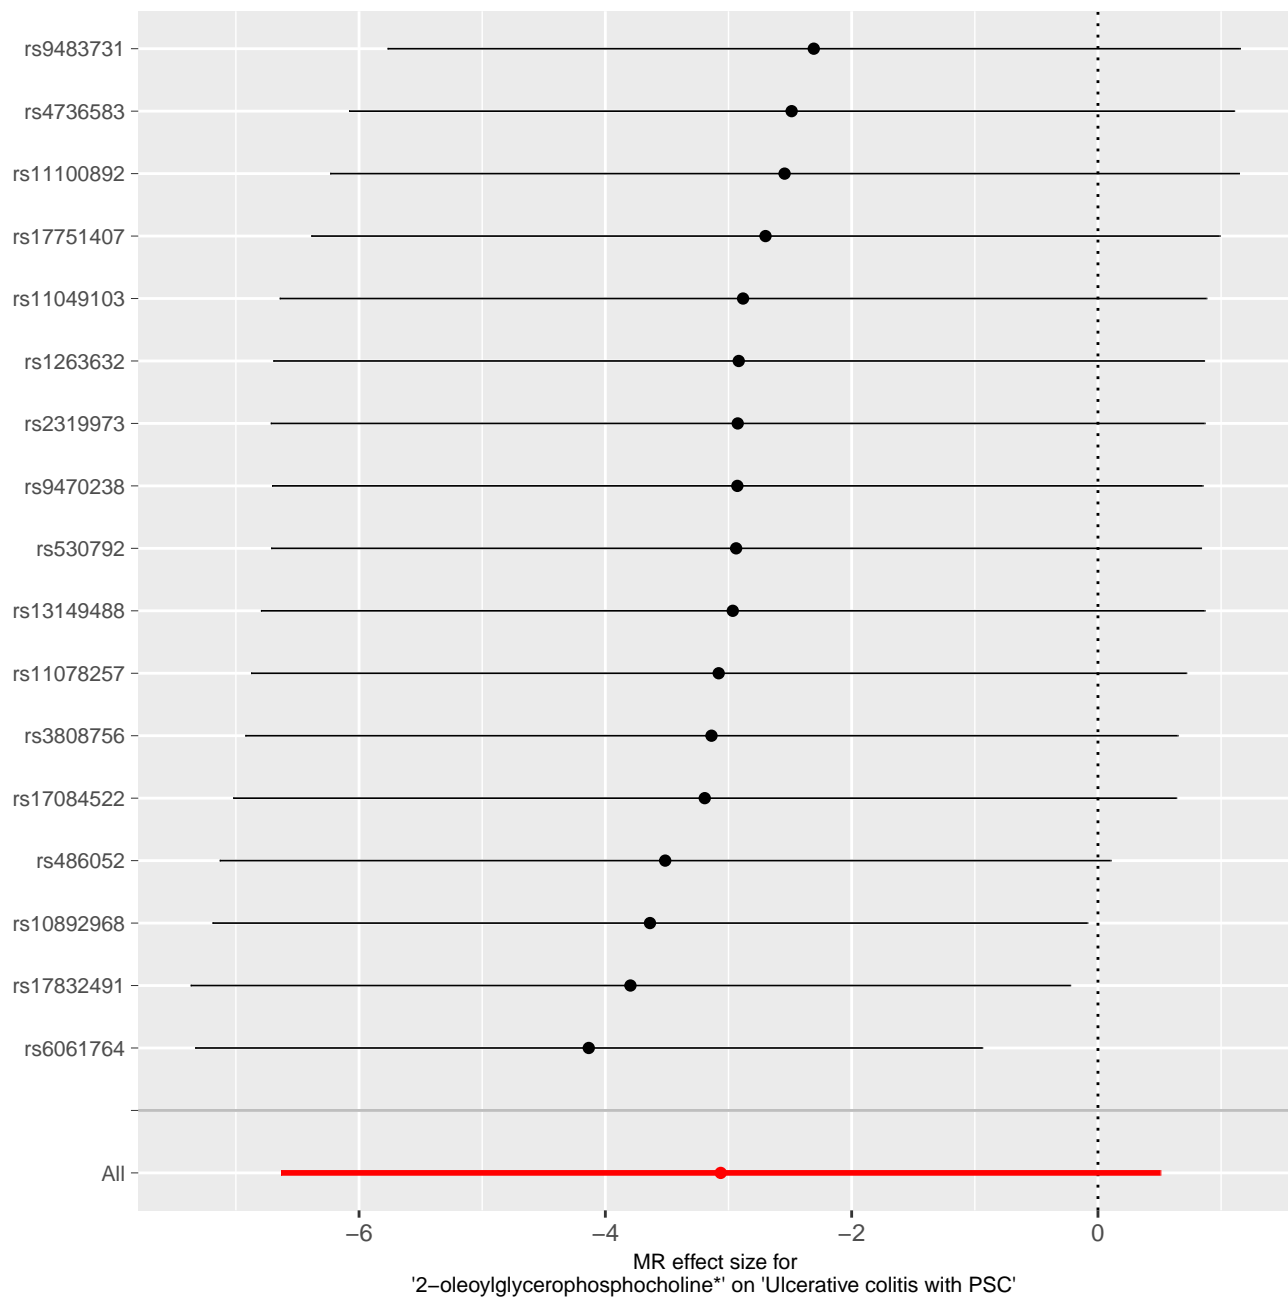

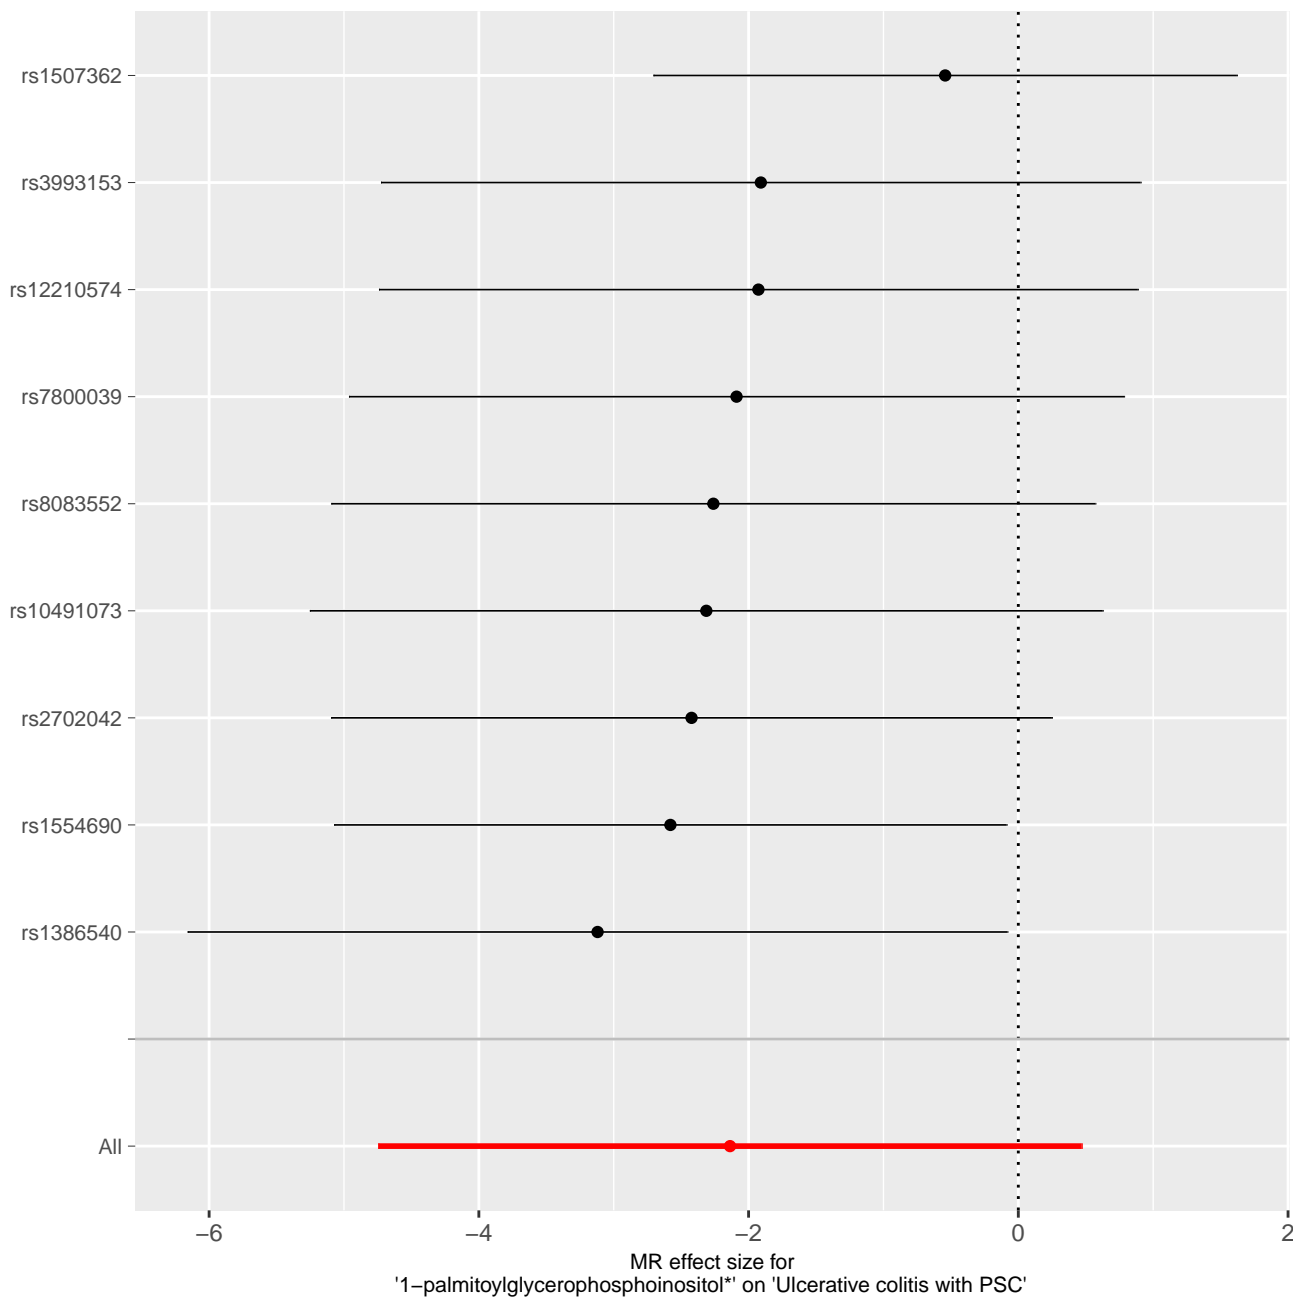

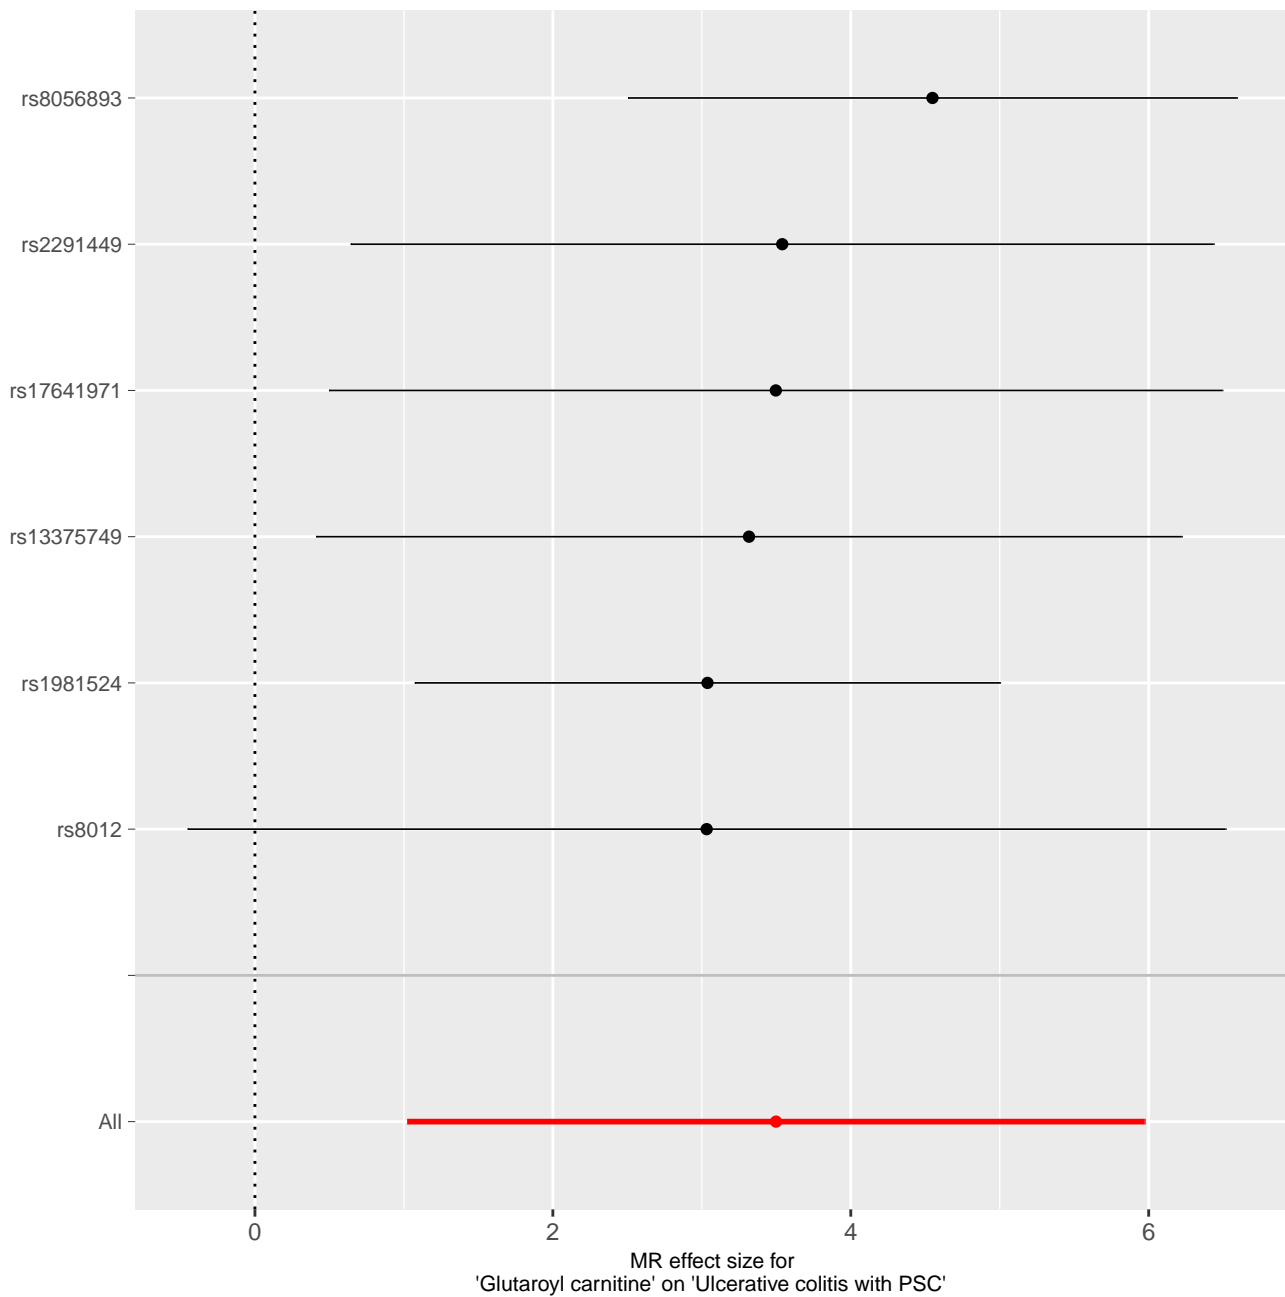

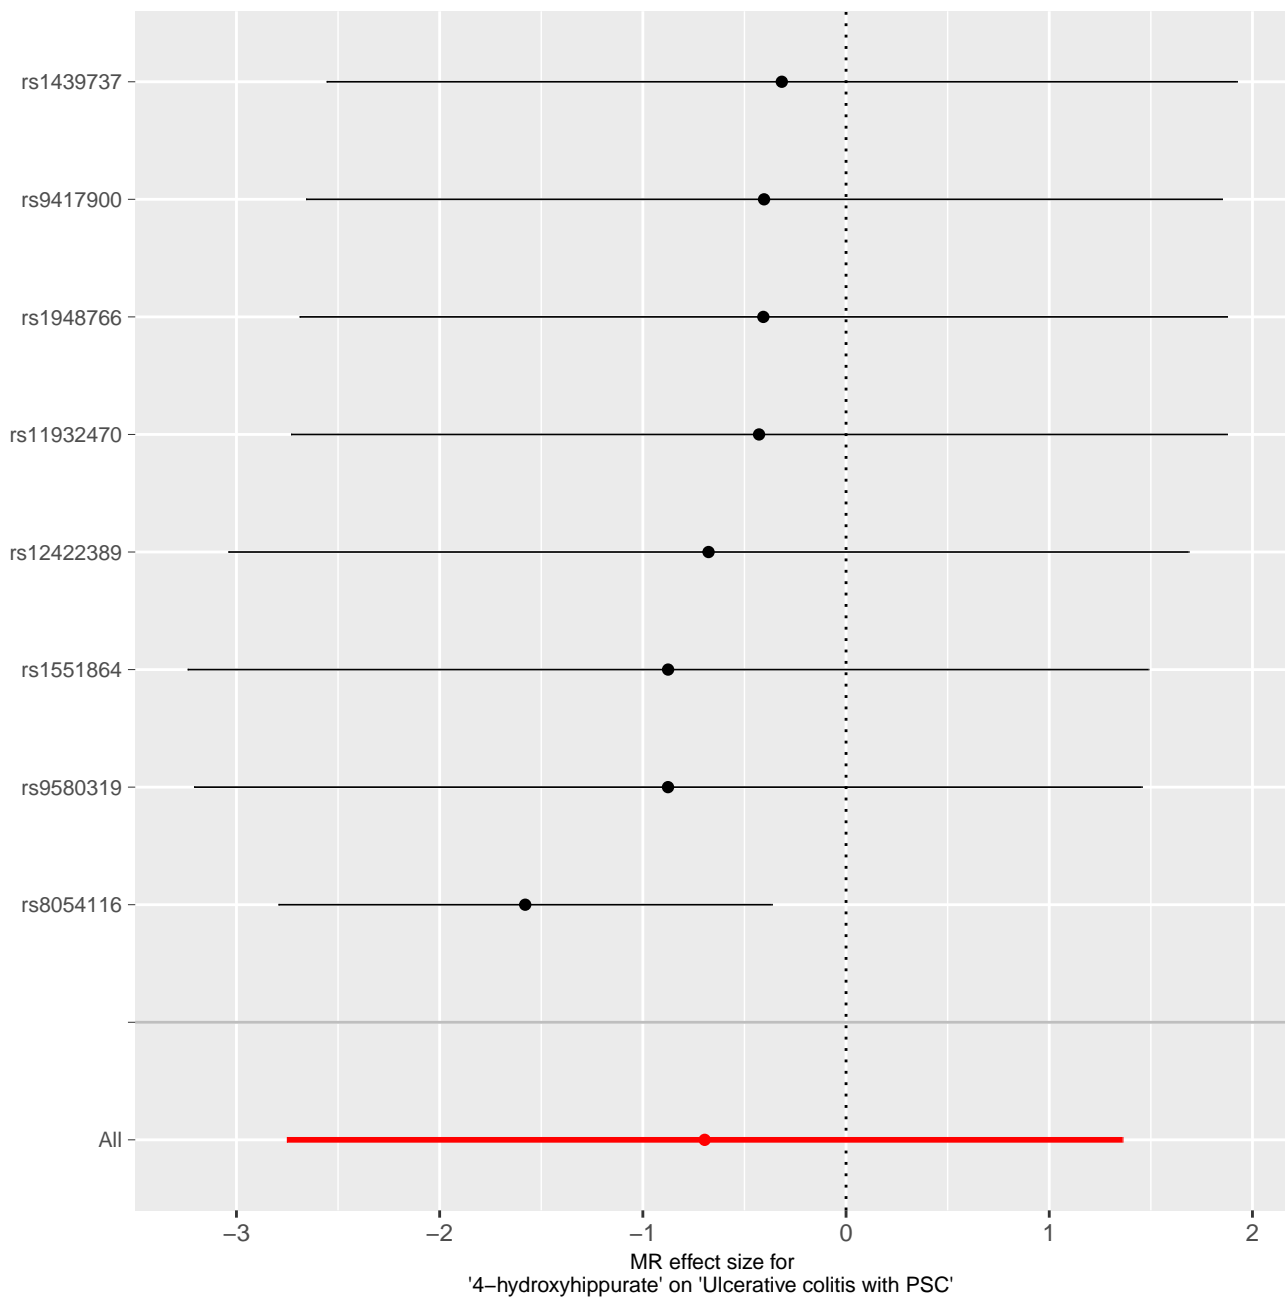

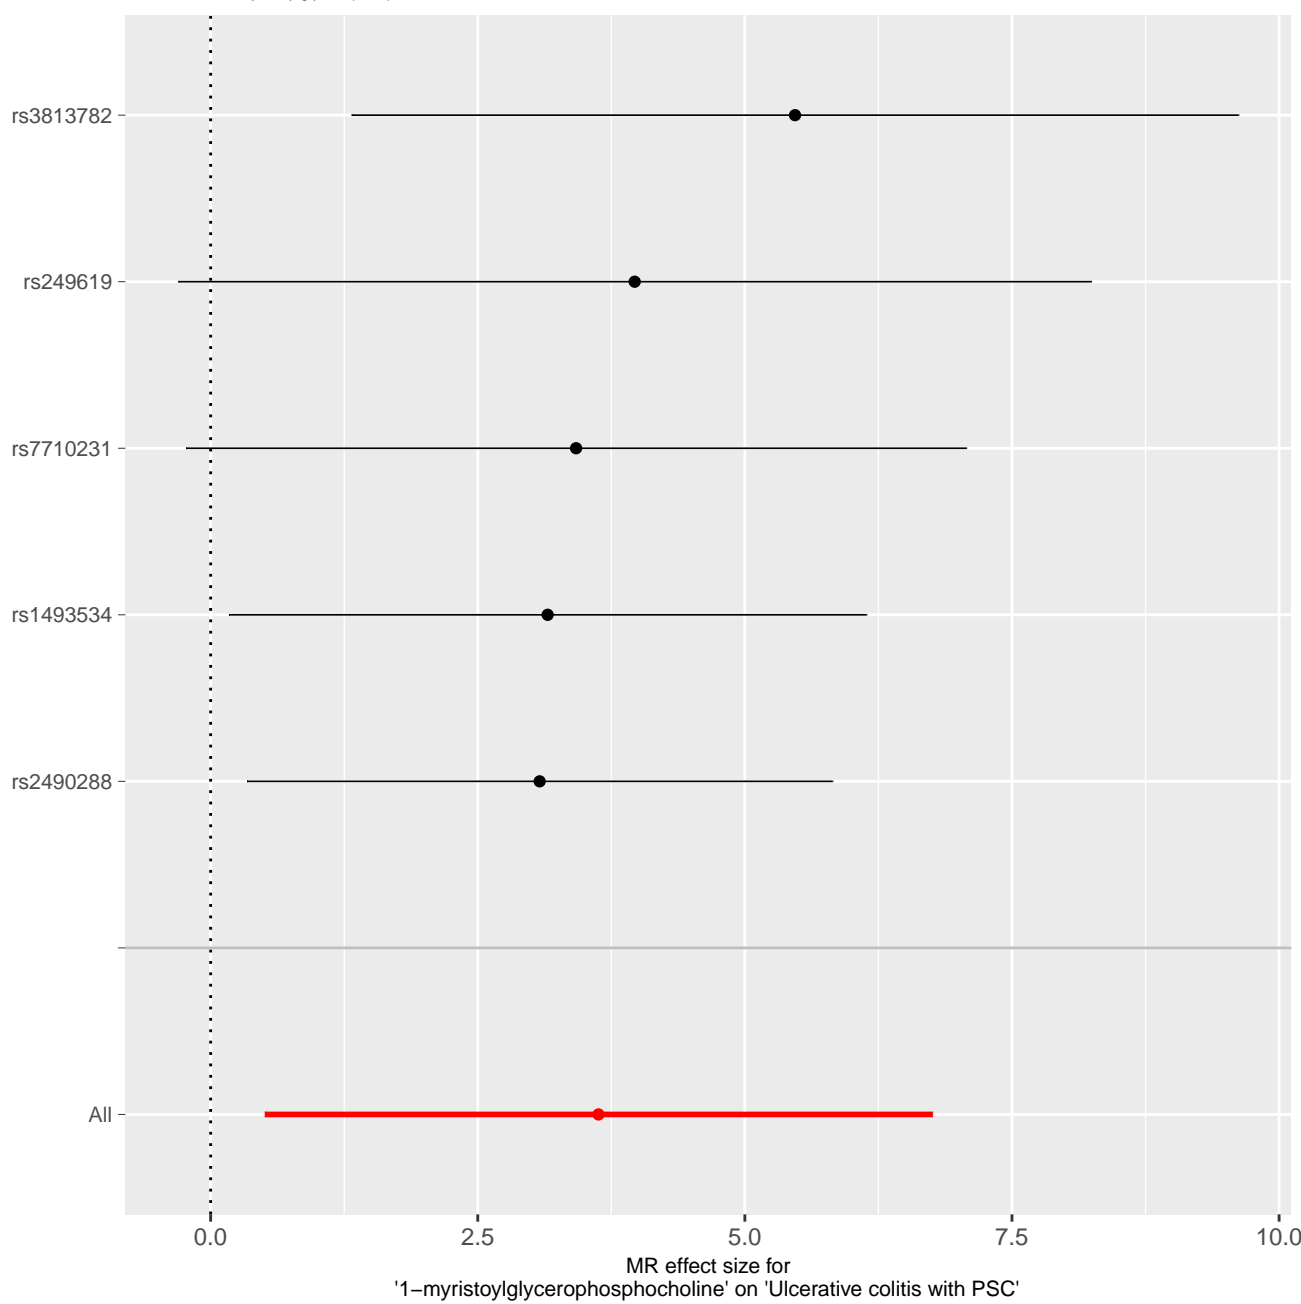

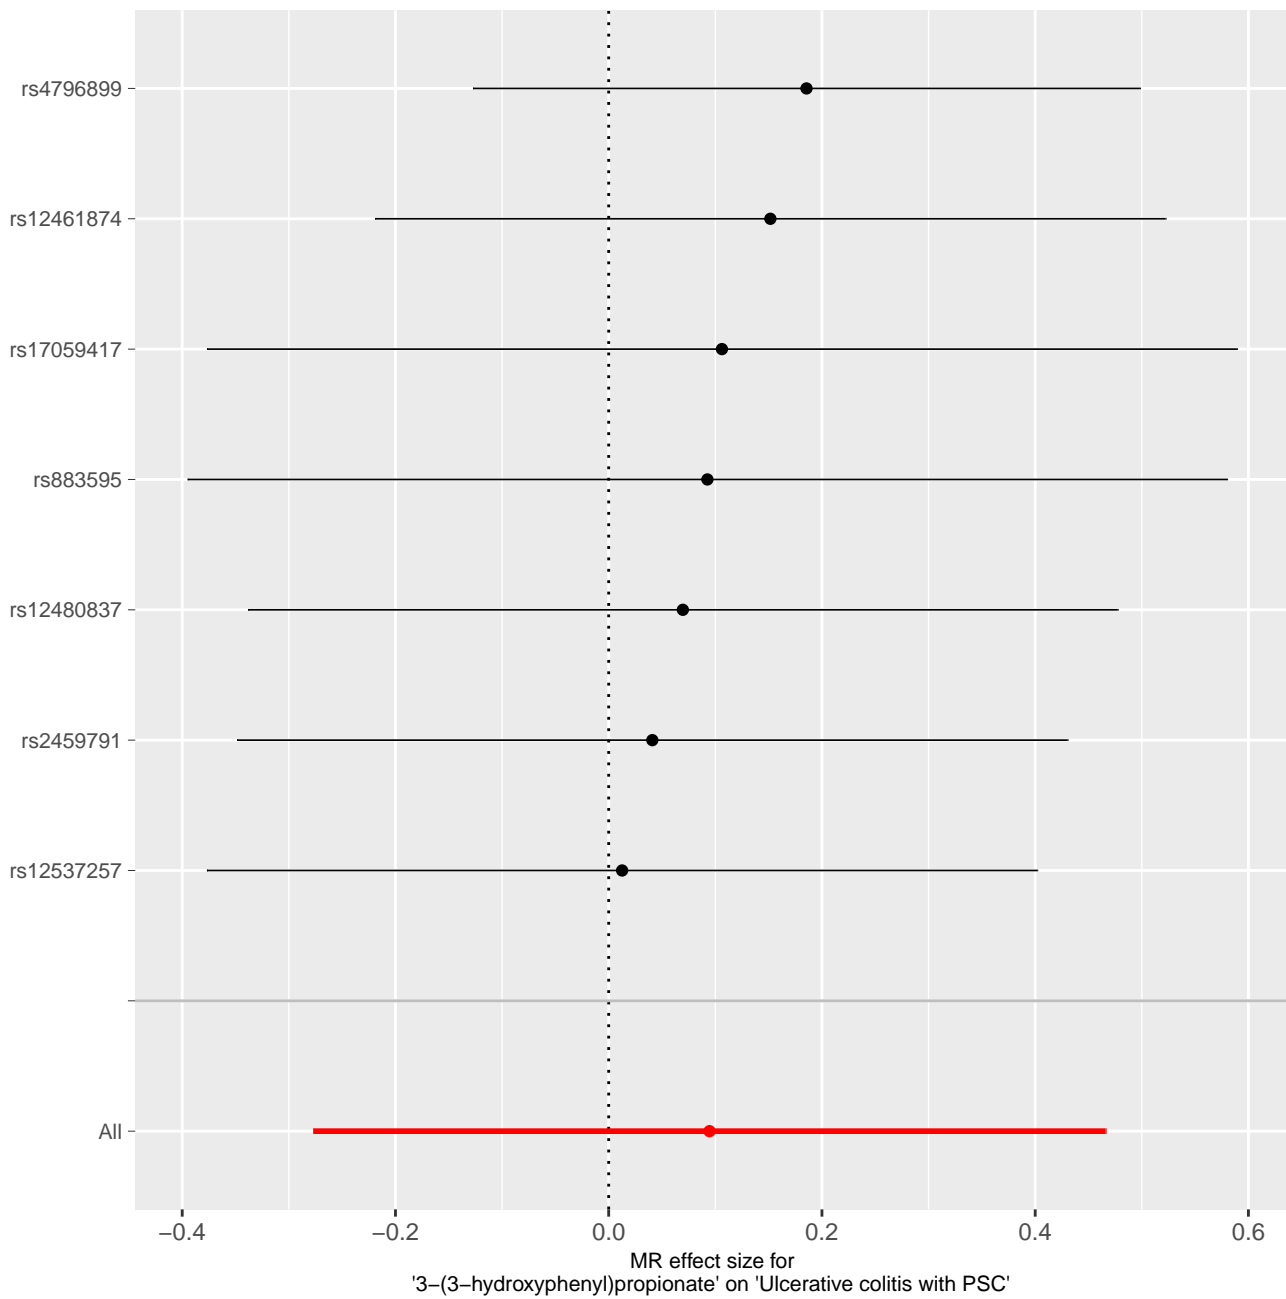

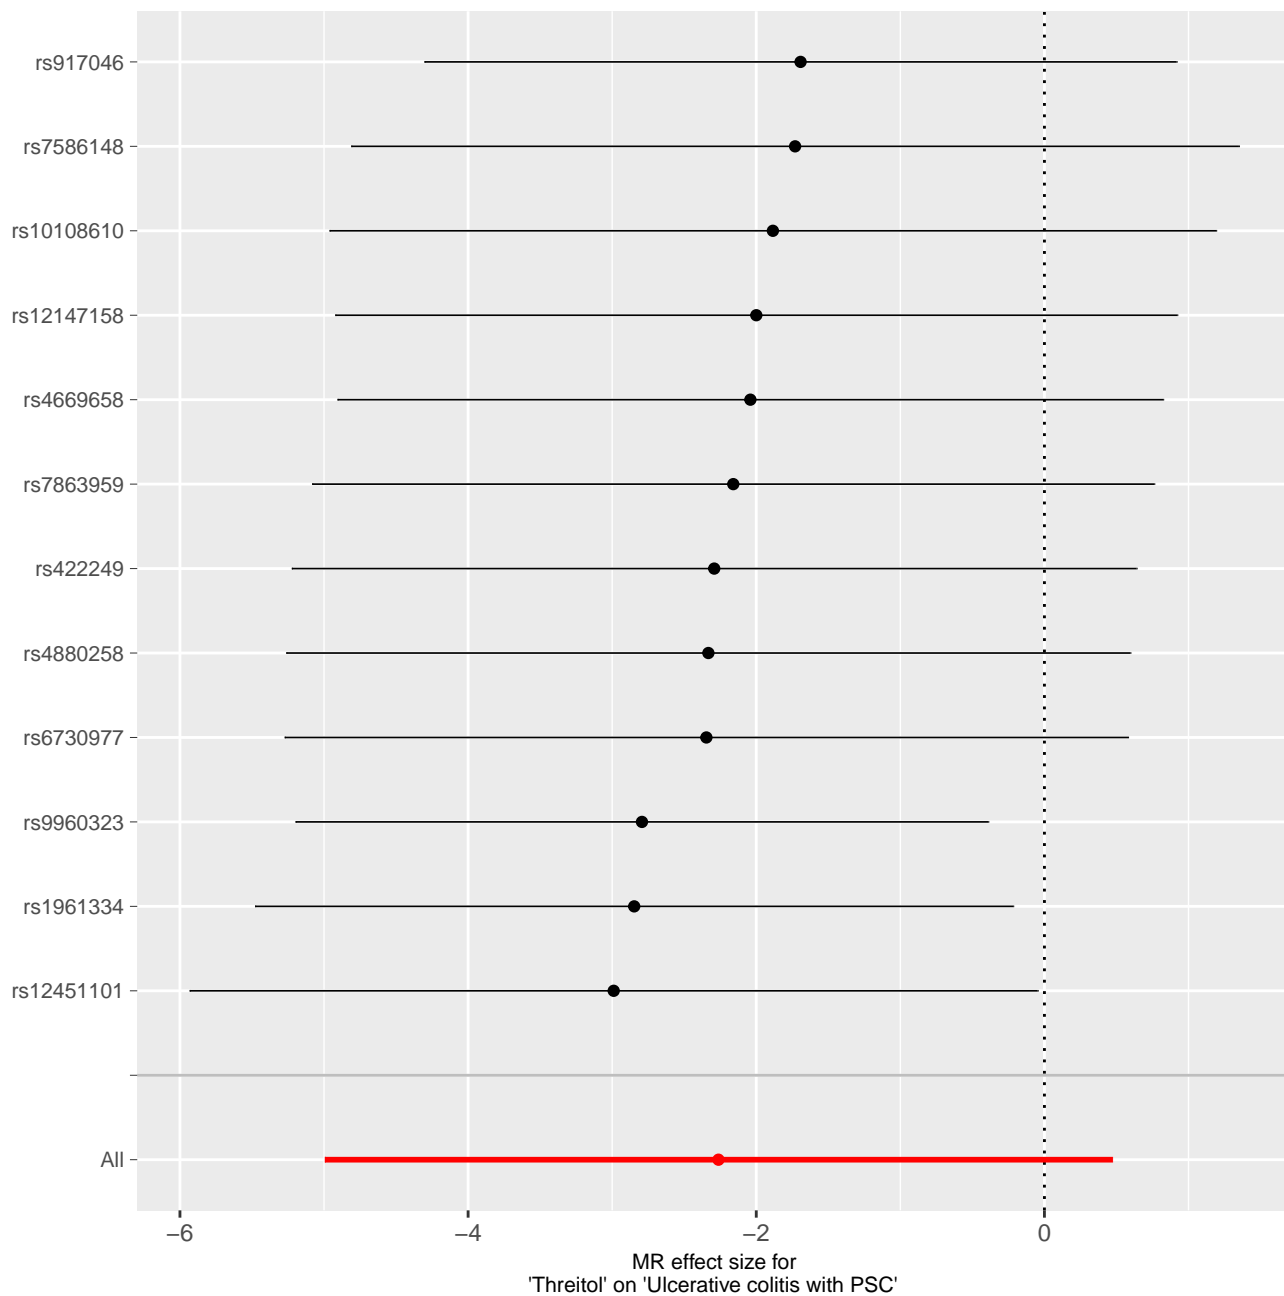



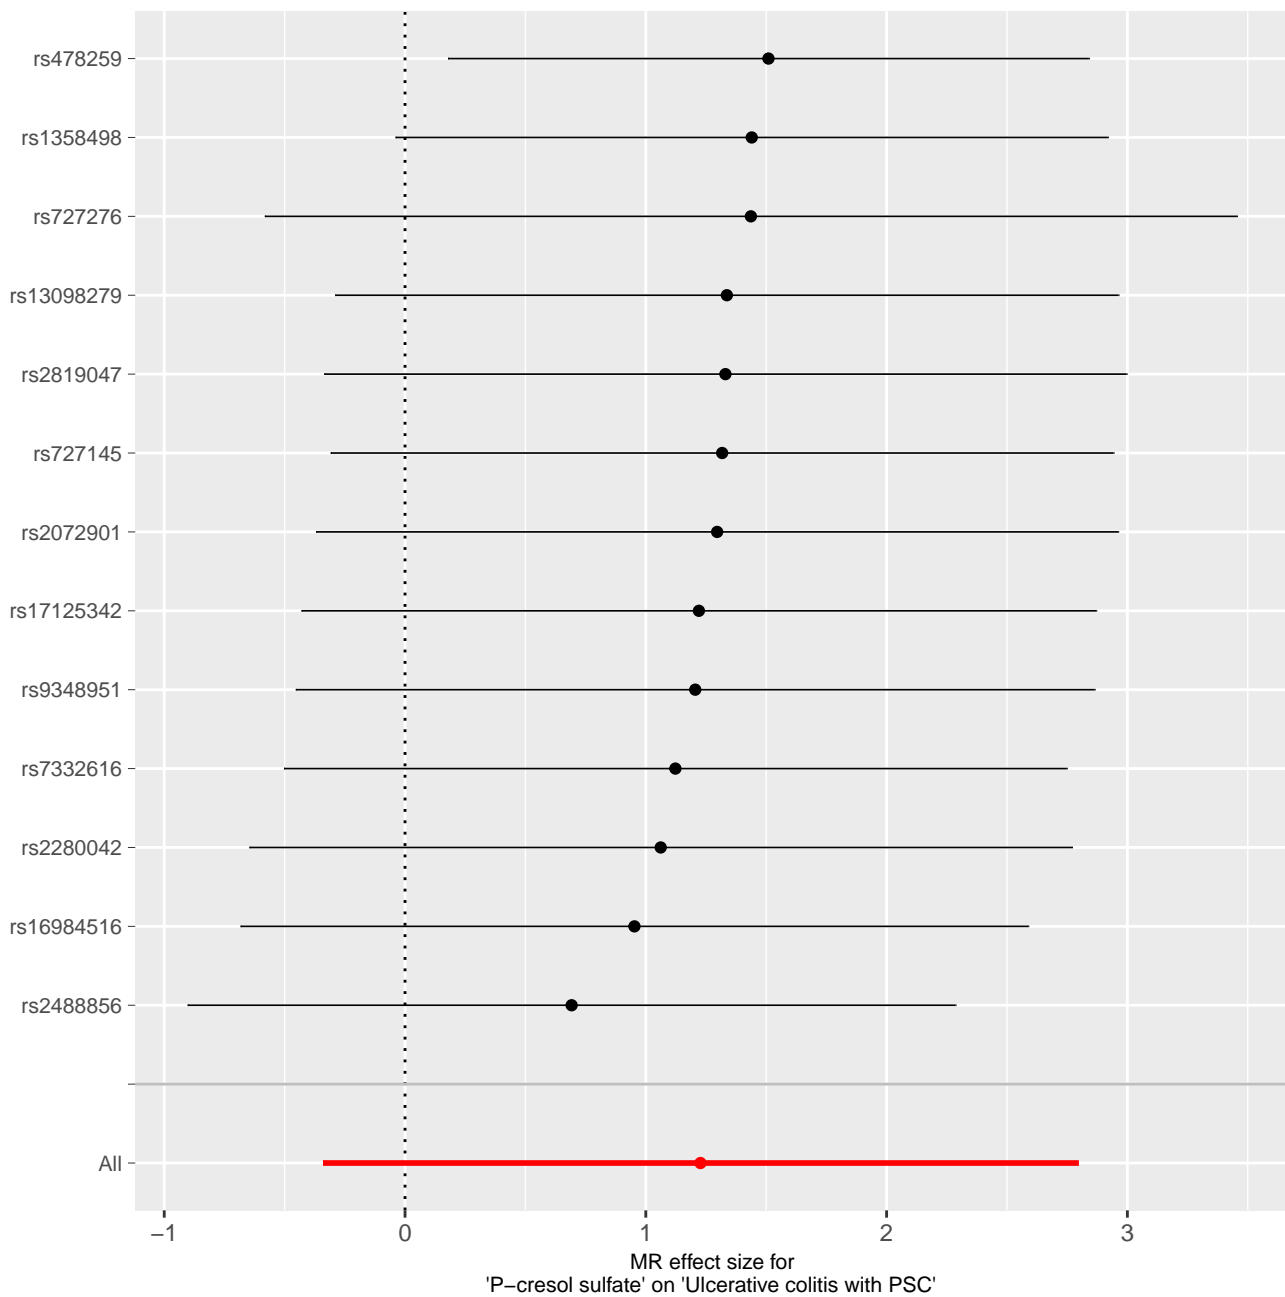

rs1893285

rs1192458

rs7021014

rs2874702

All

-1

0

MR effect size for

'X-14450--phenylalanylleucine' on 'Ulcerative colitis with PSC'

1

2

3

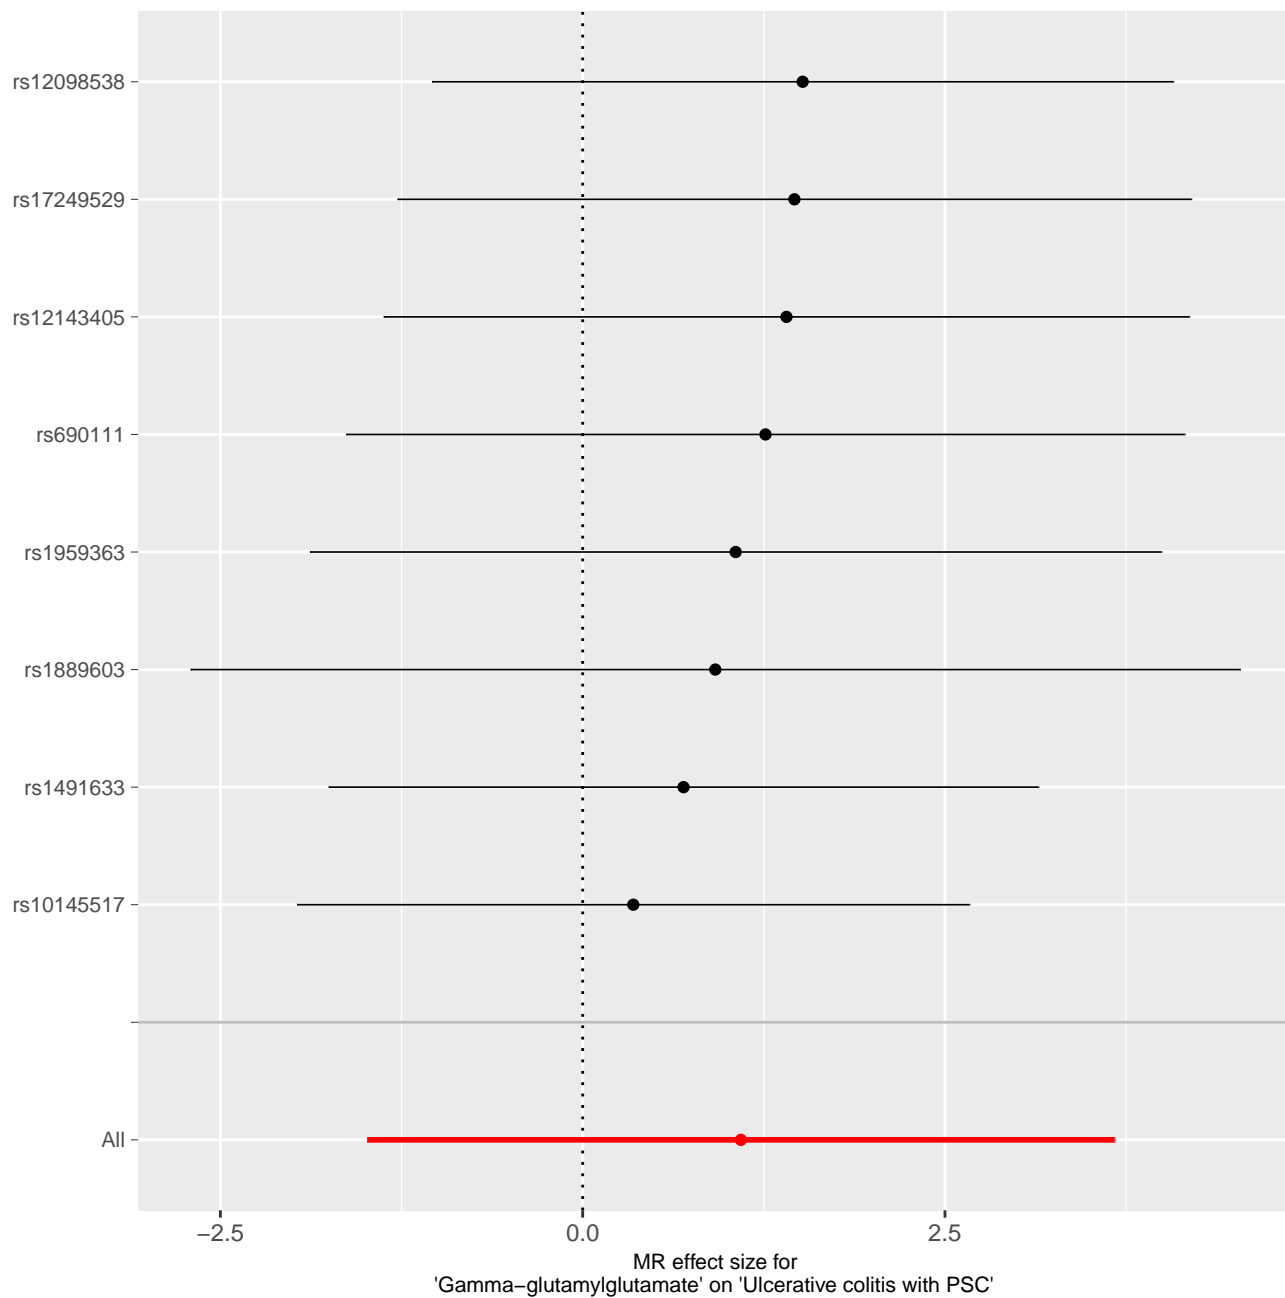

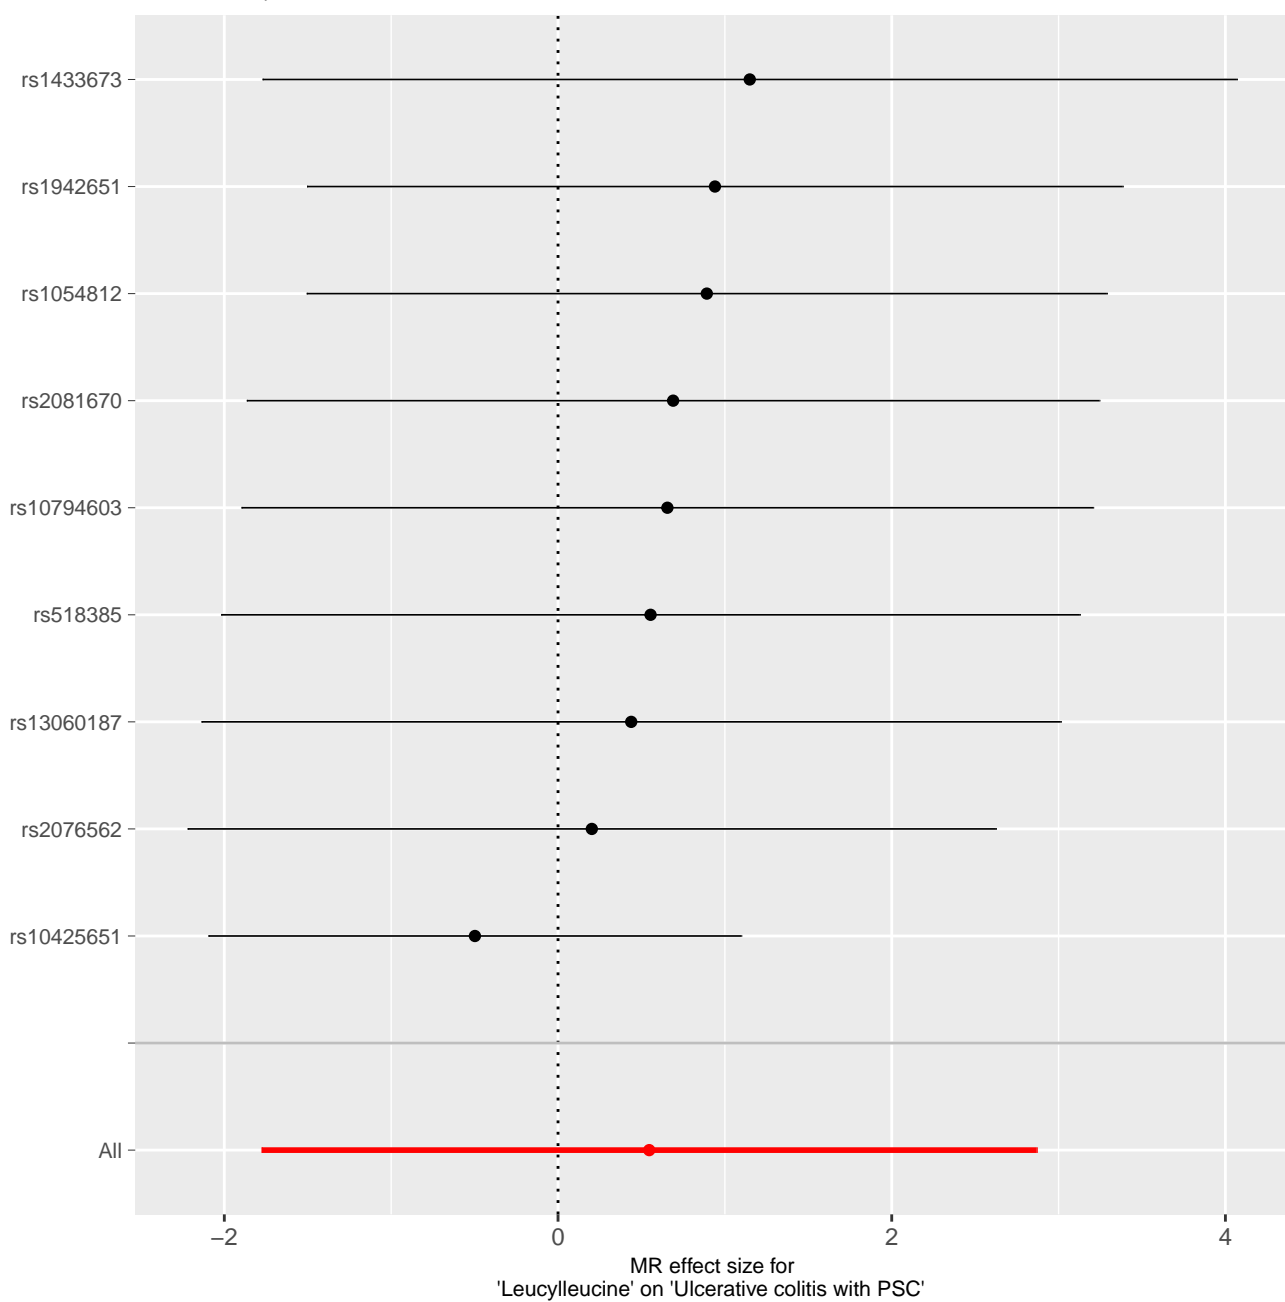

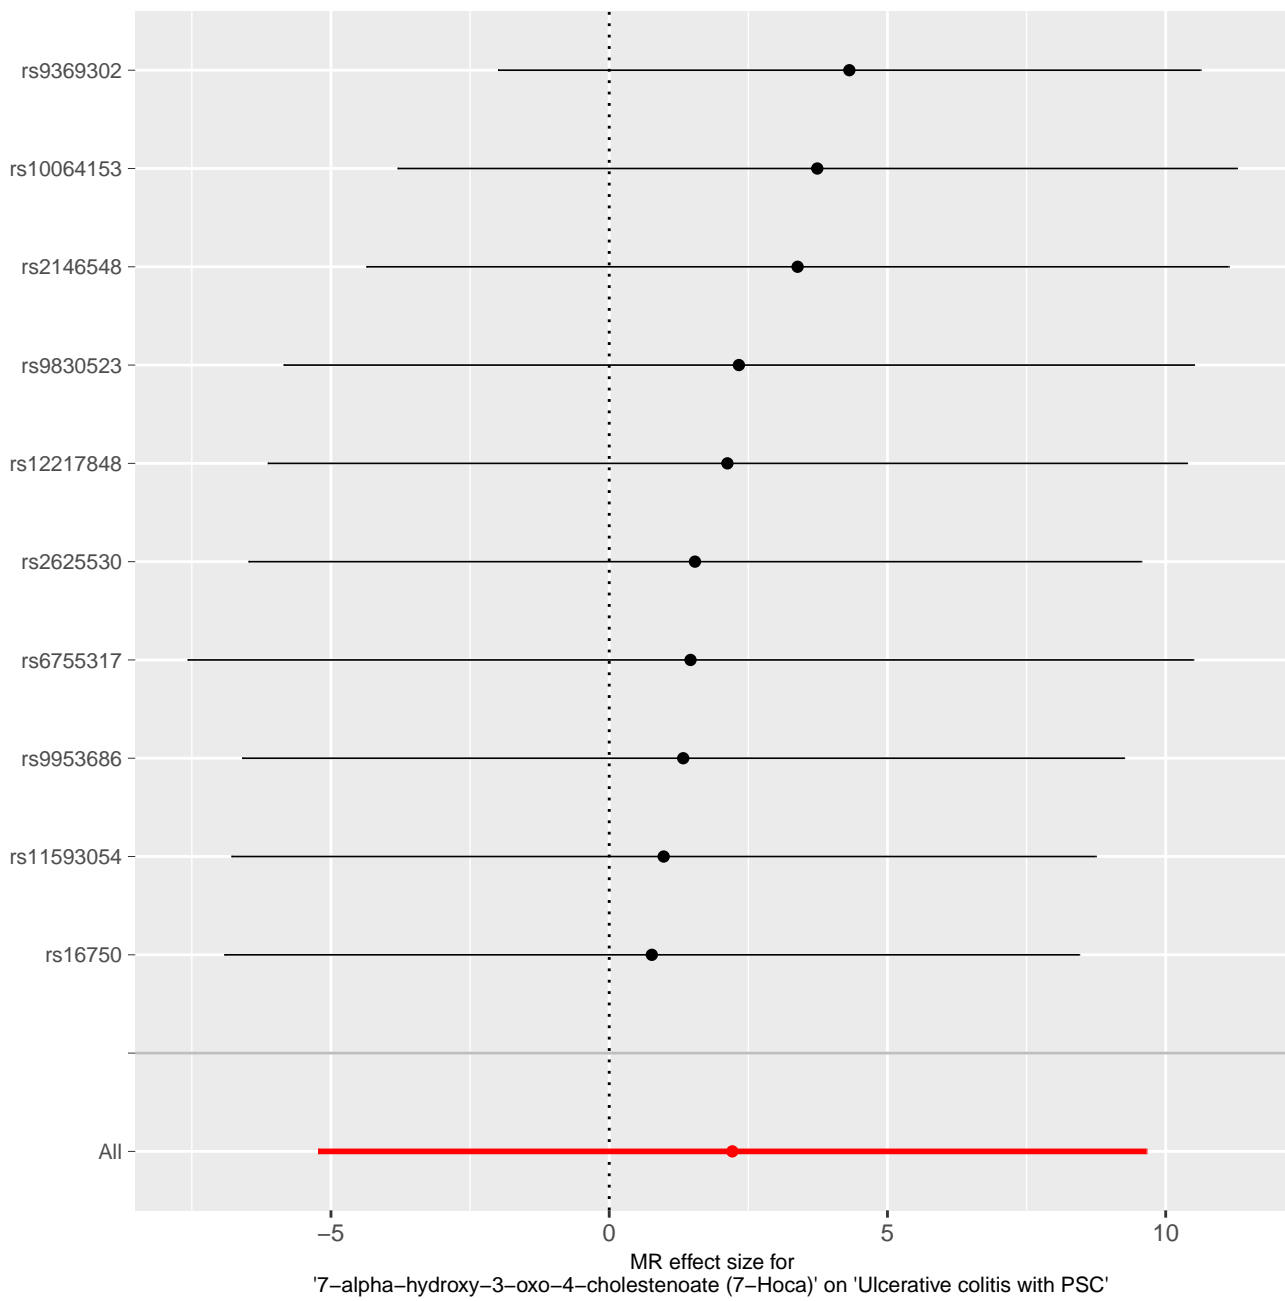

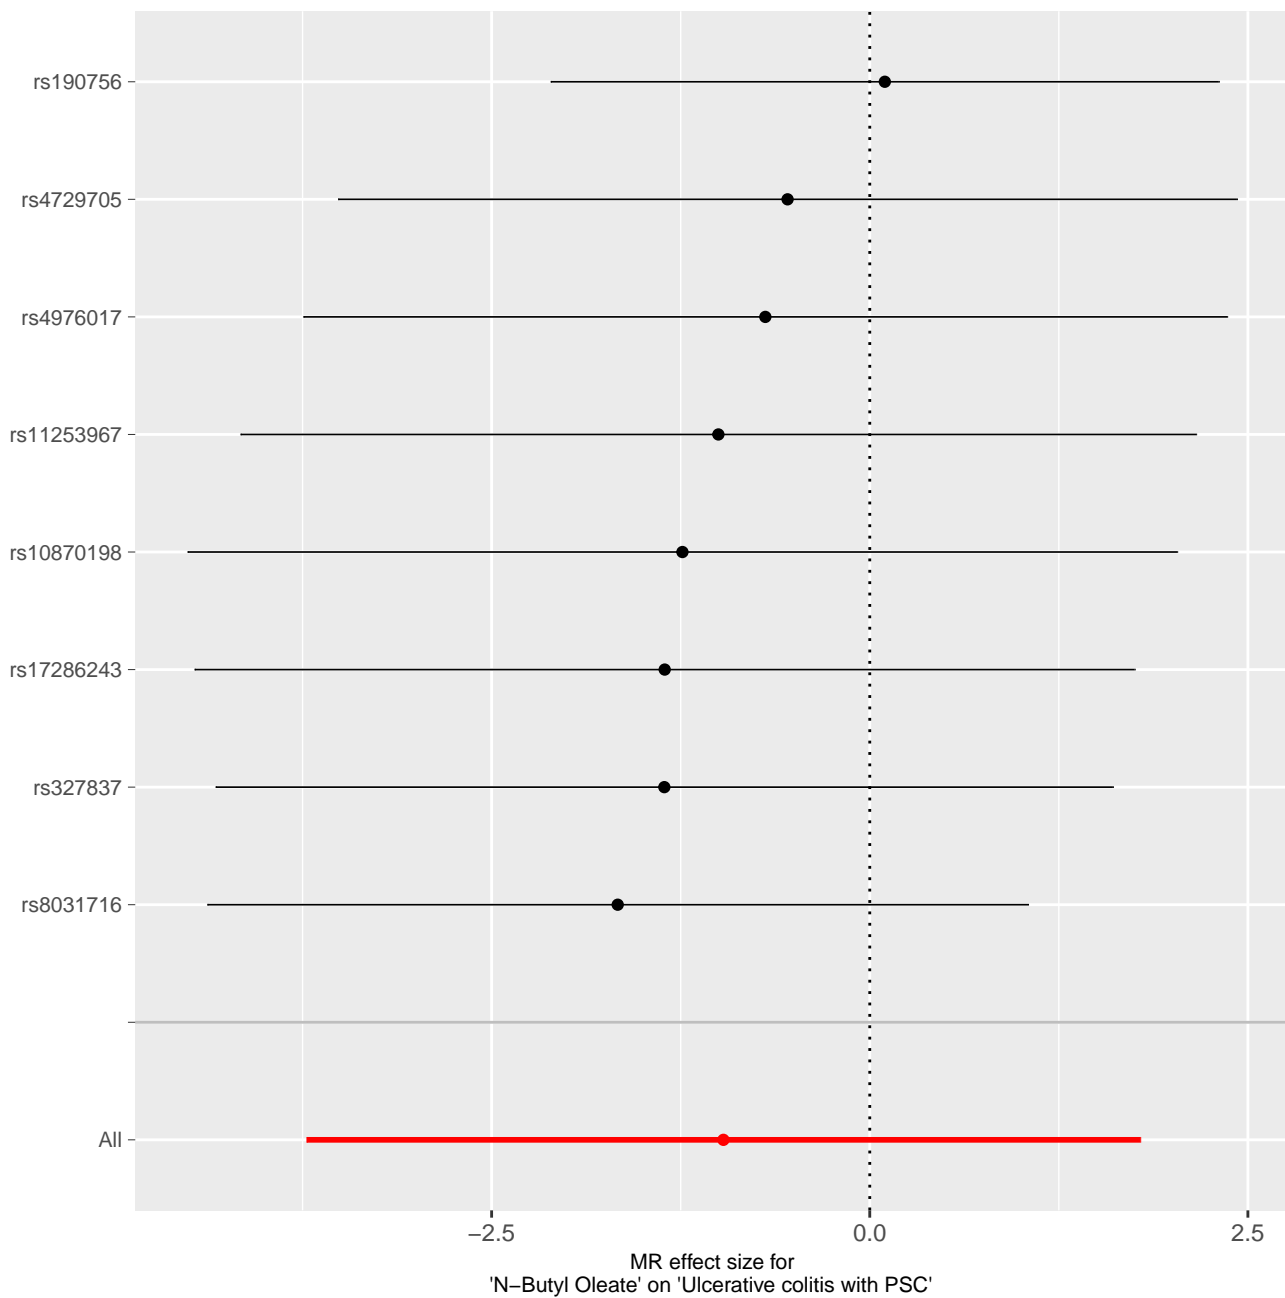

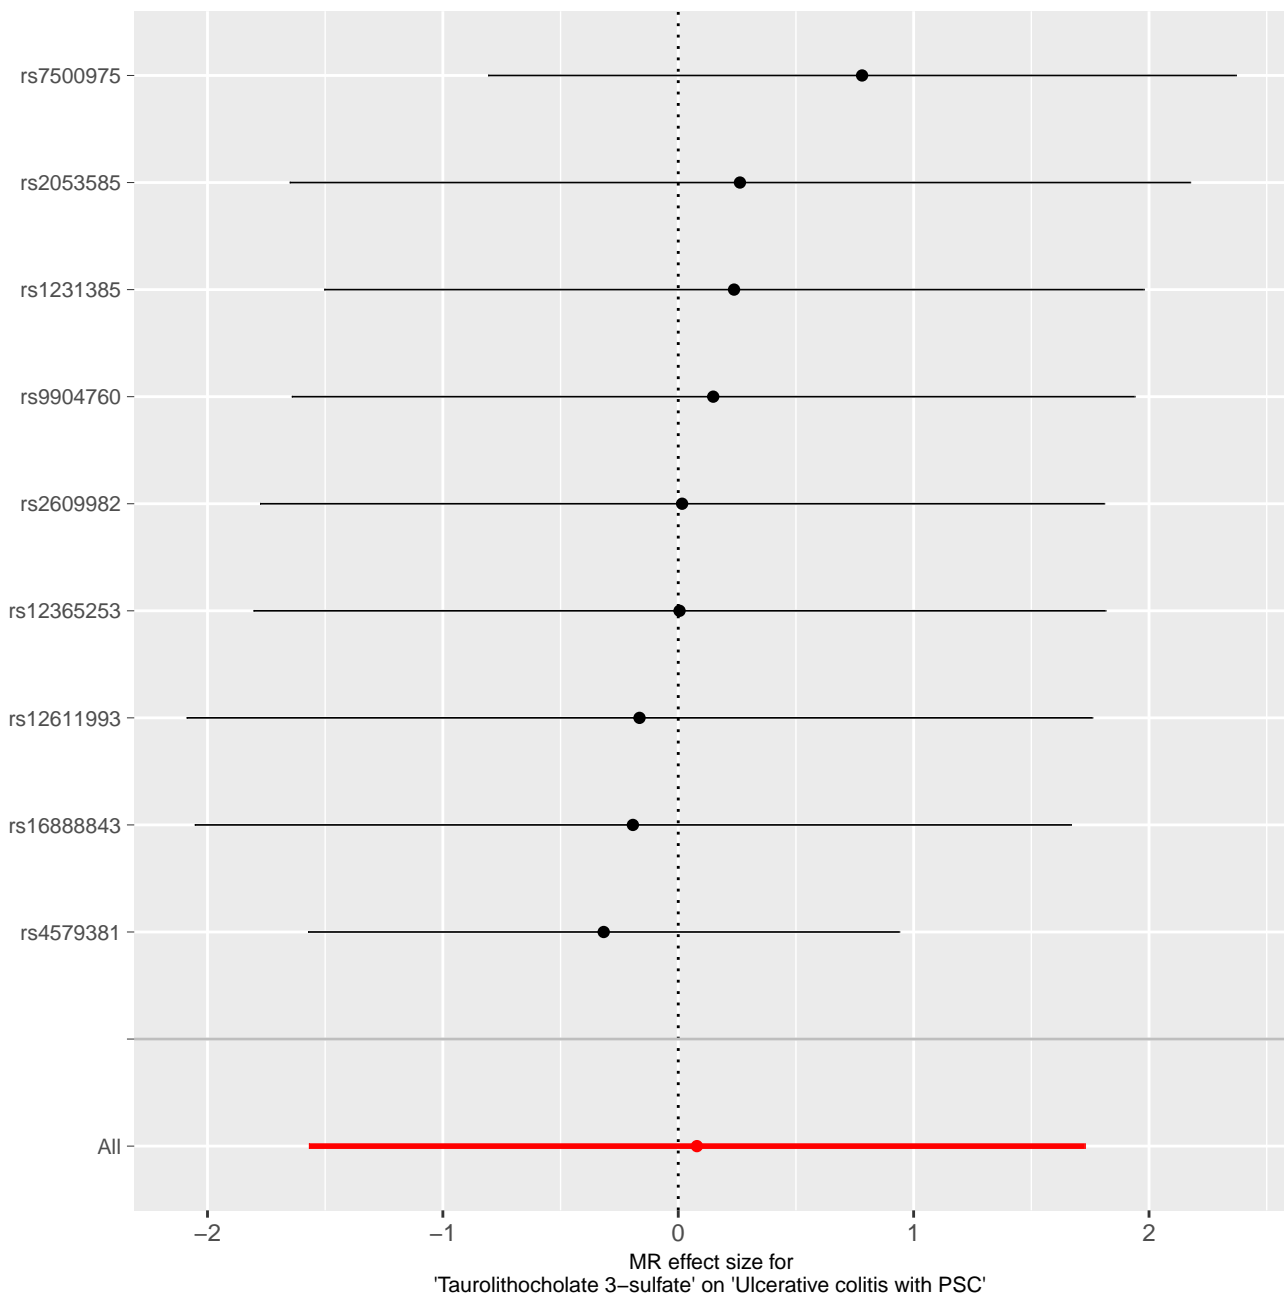

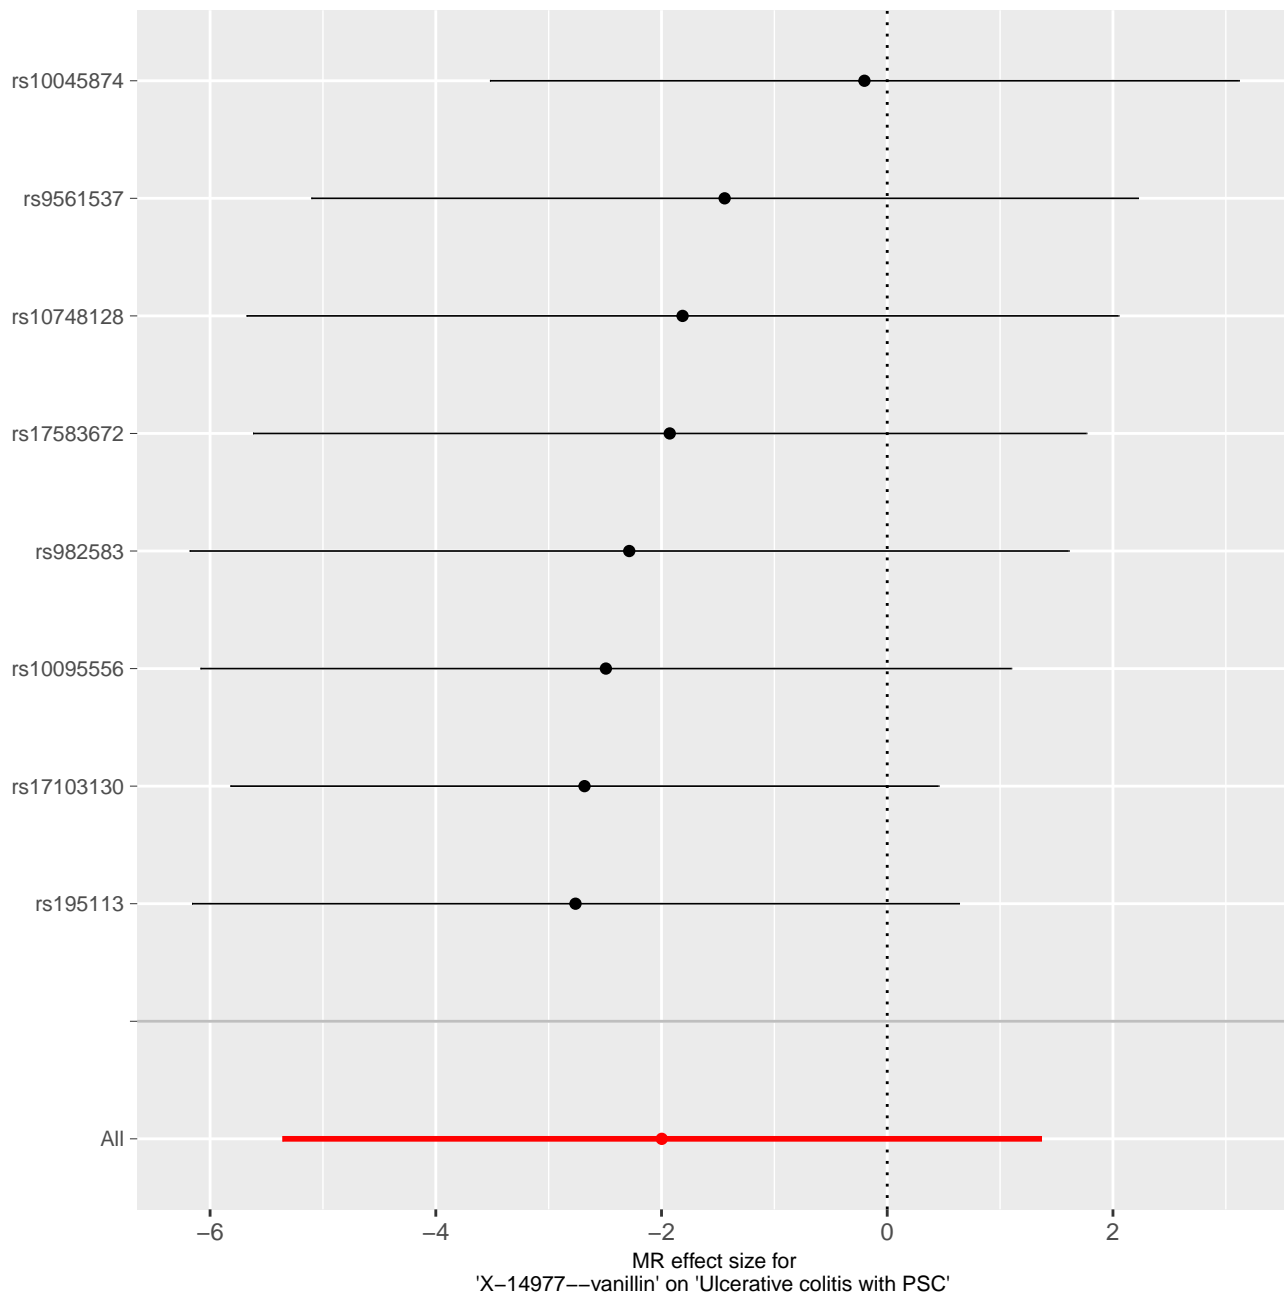



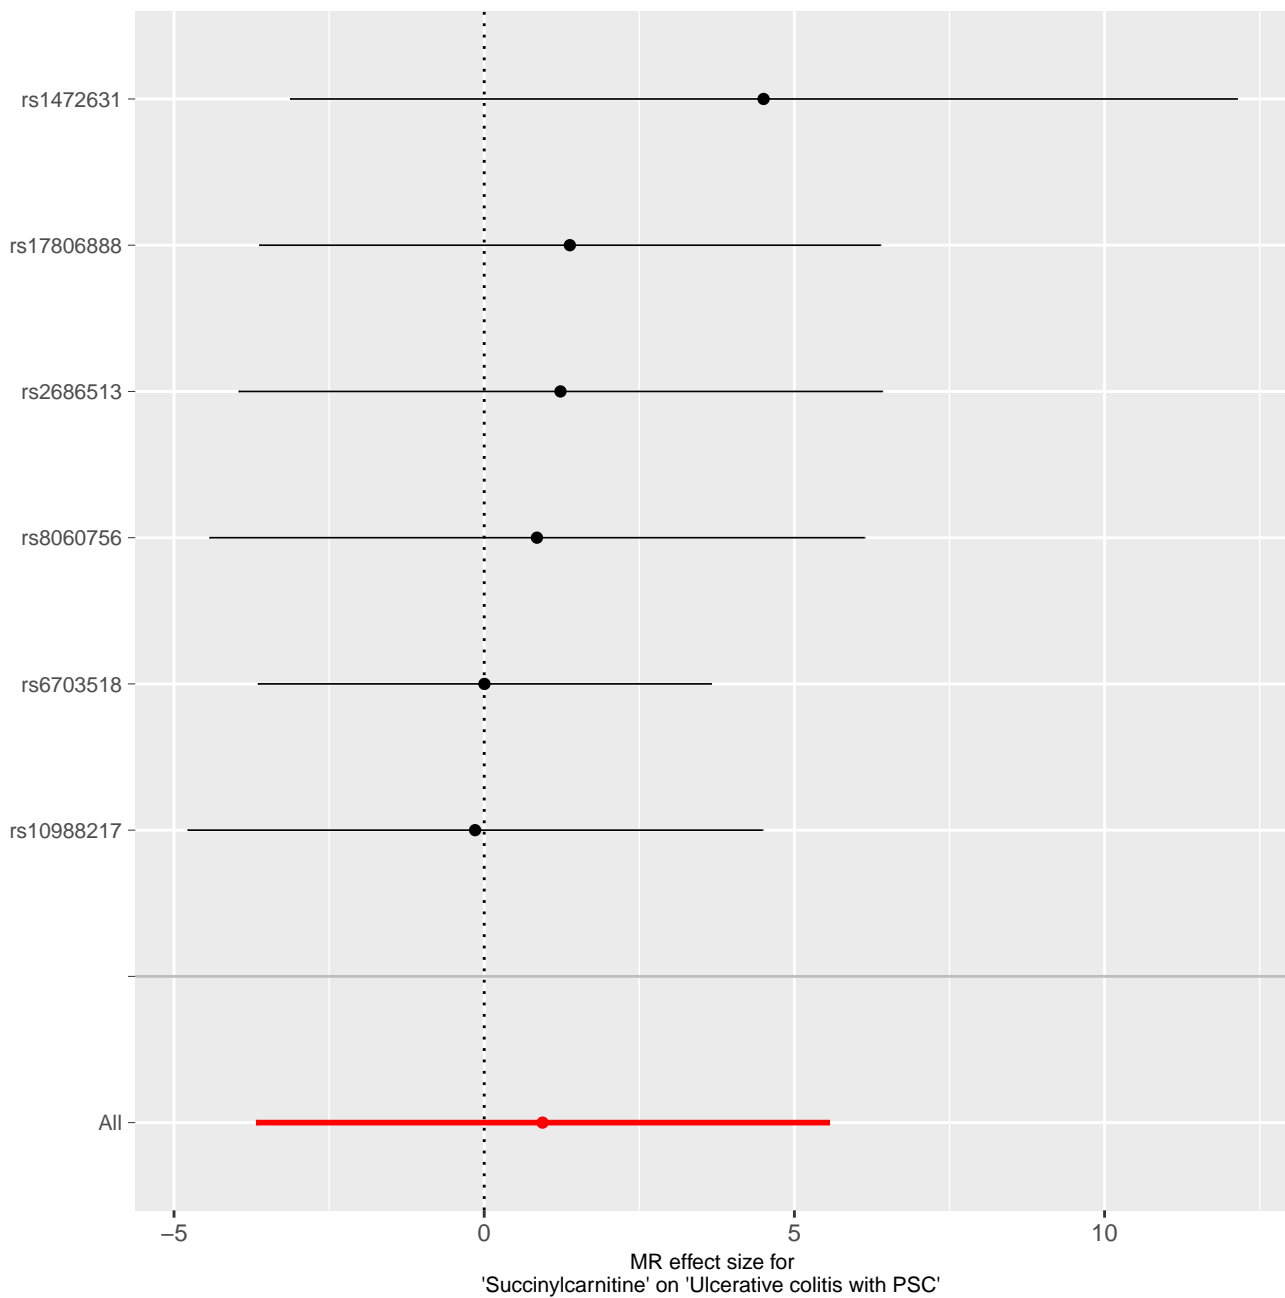

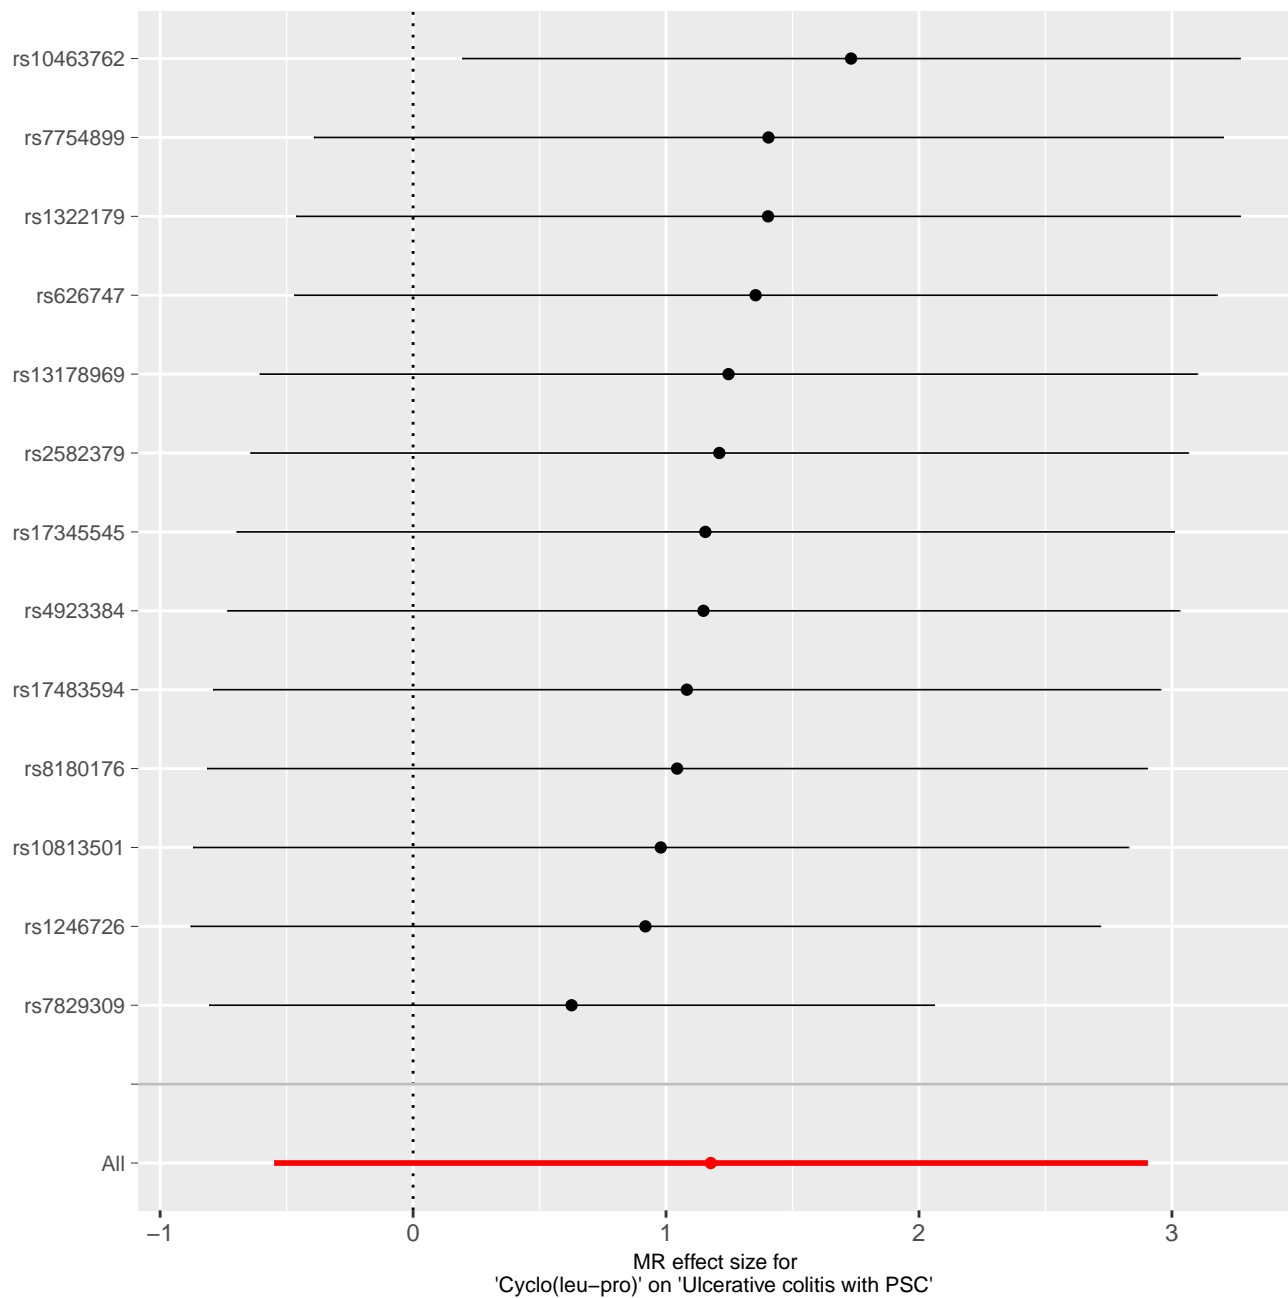

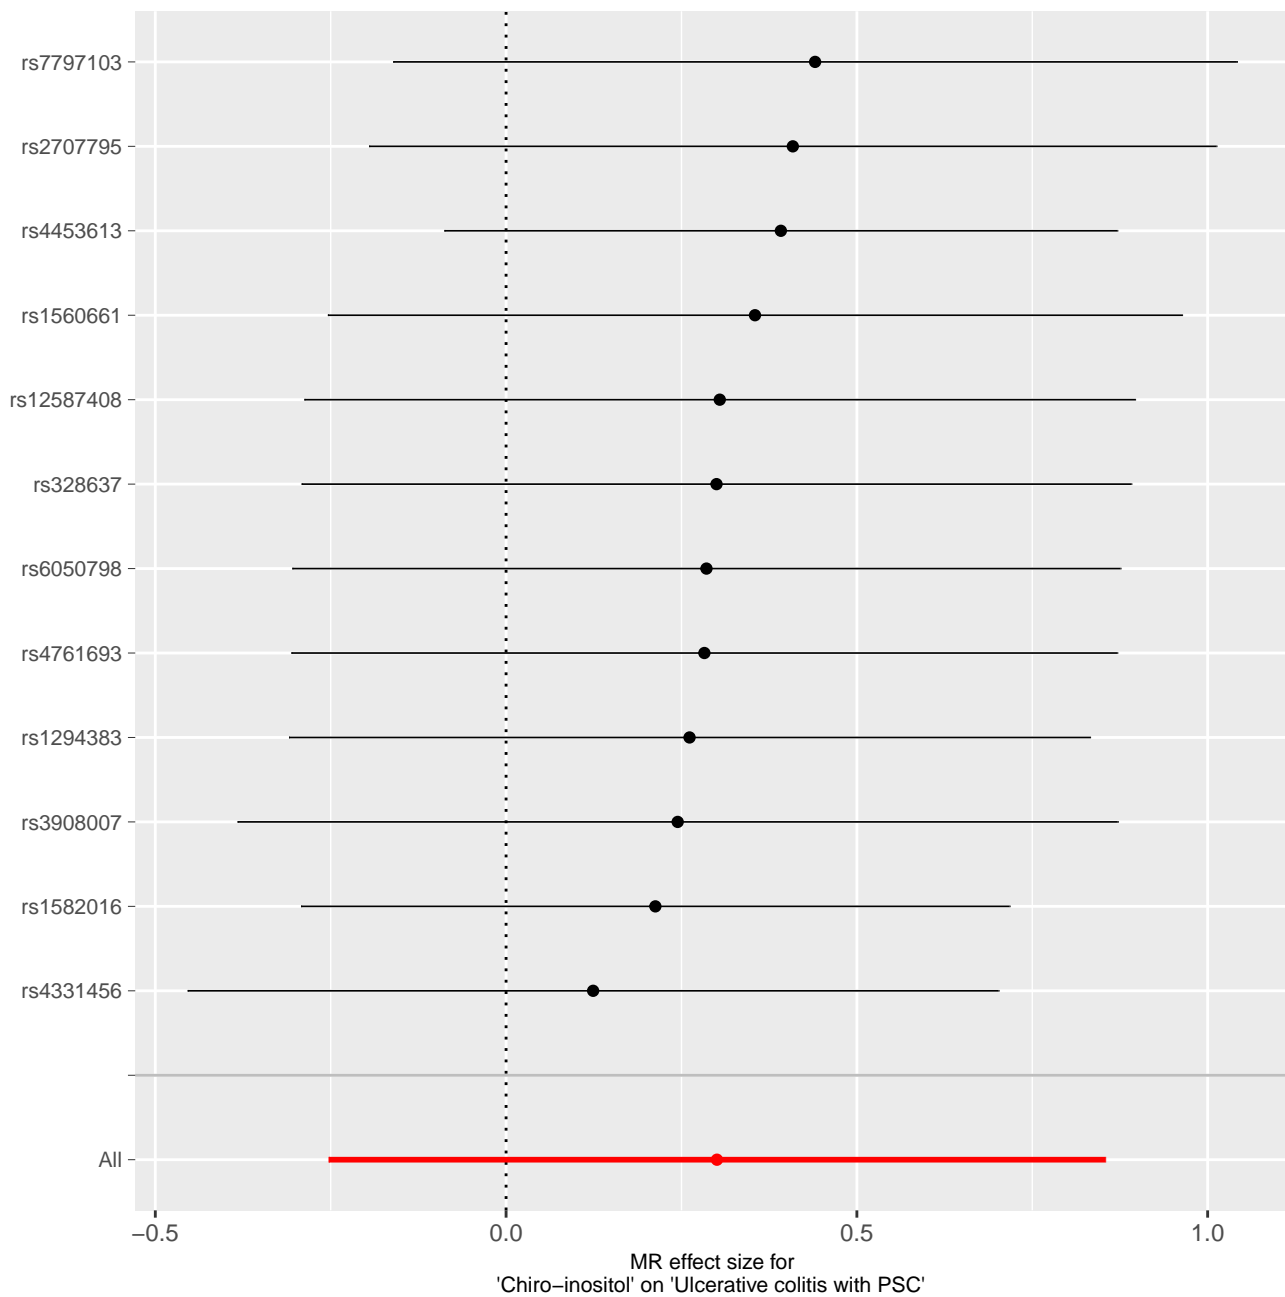

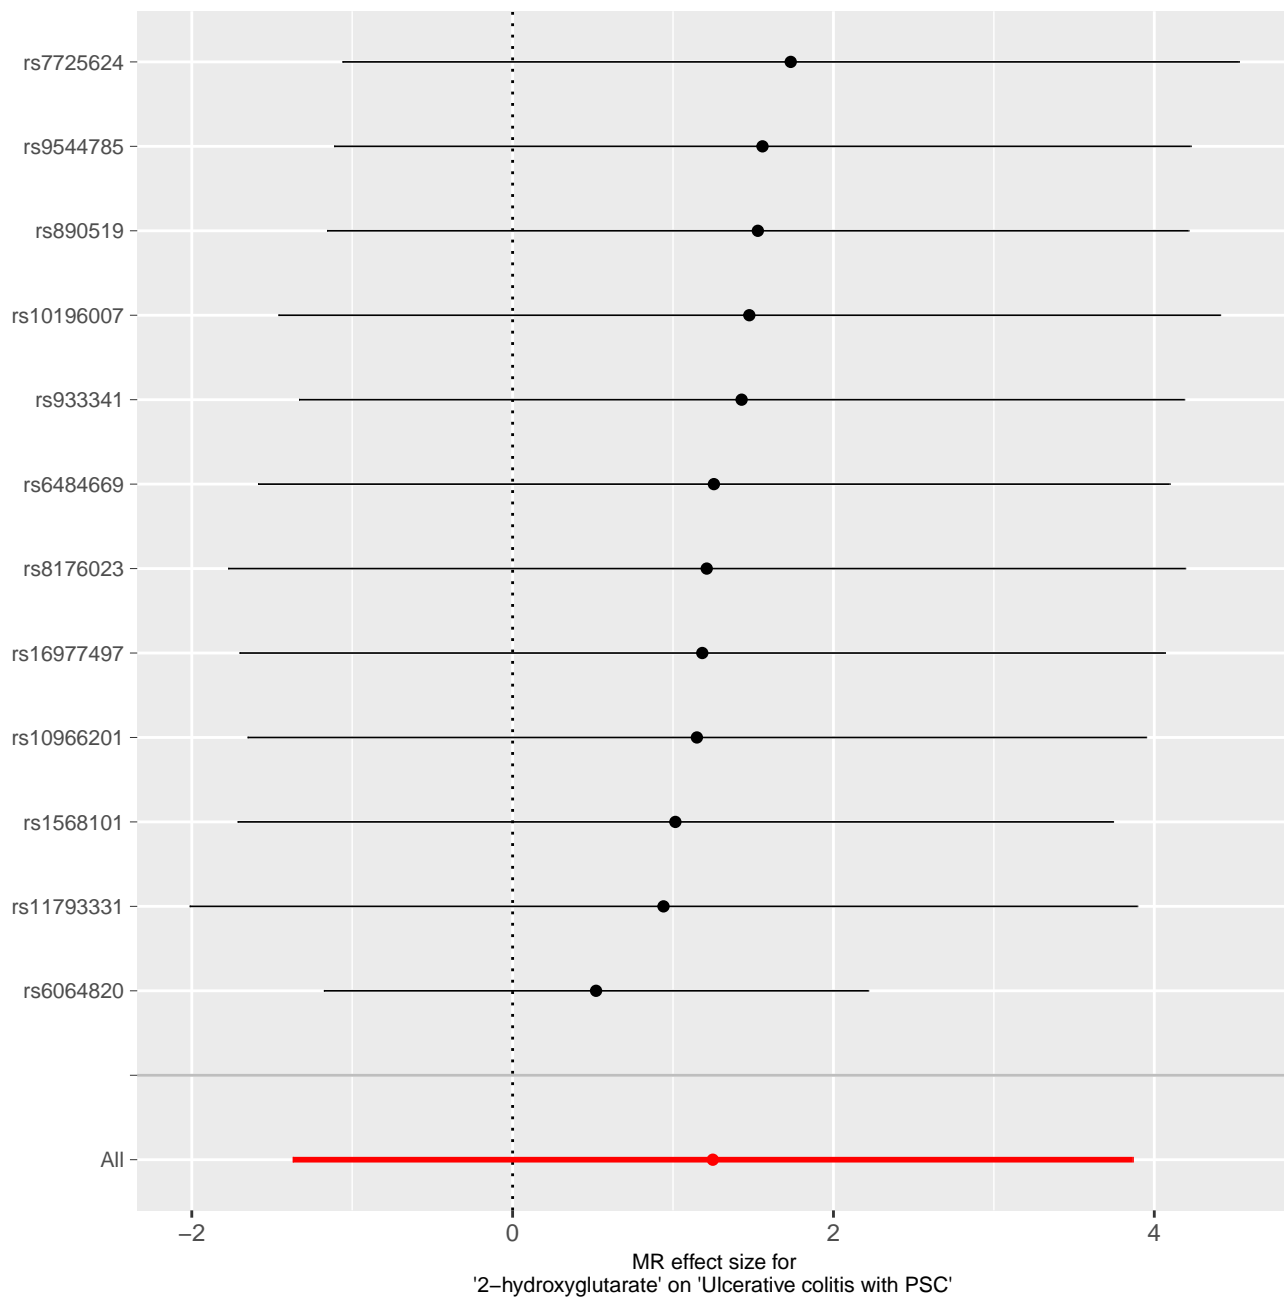

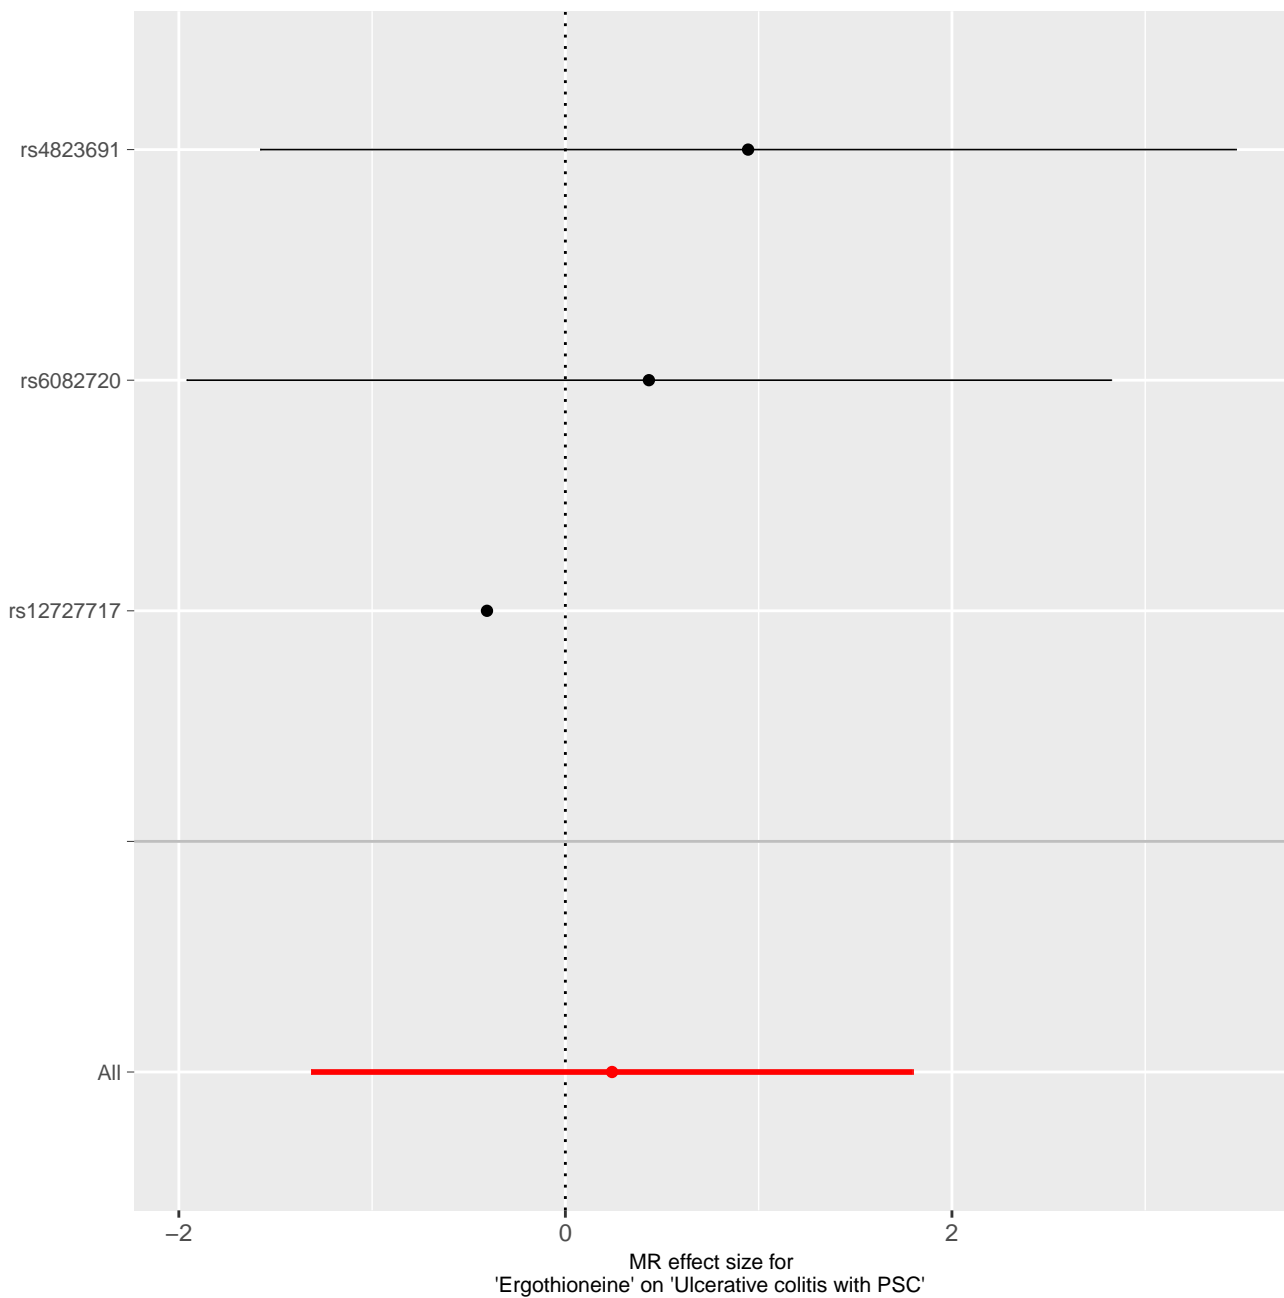

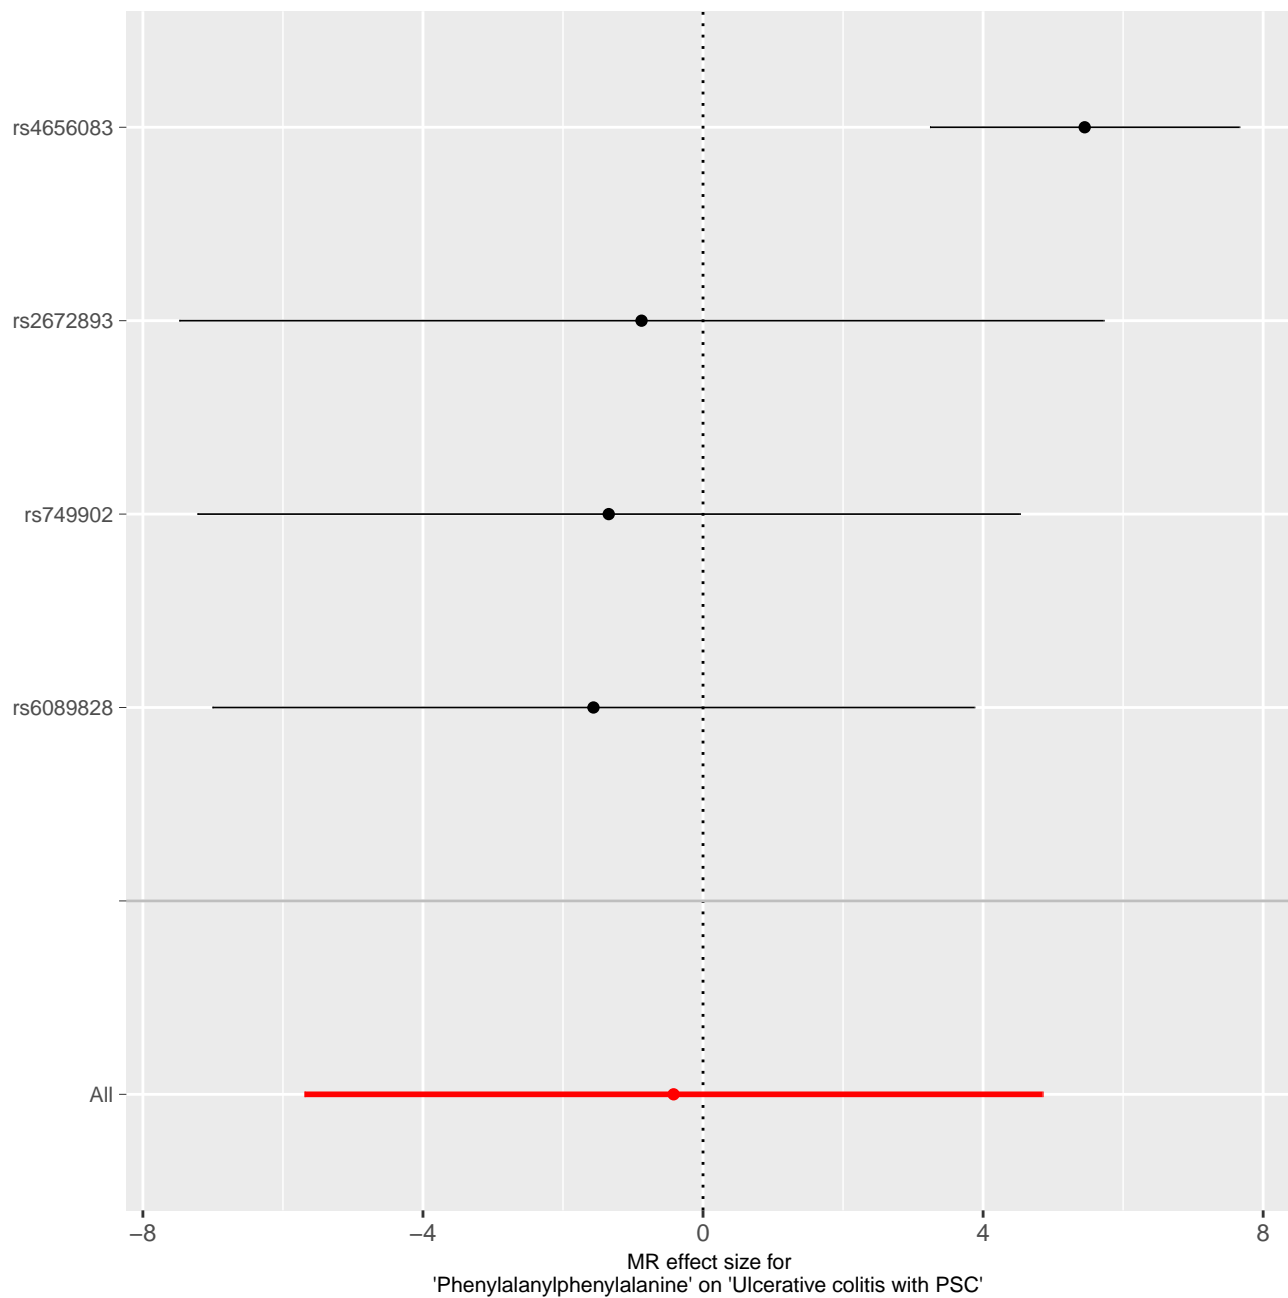

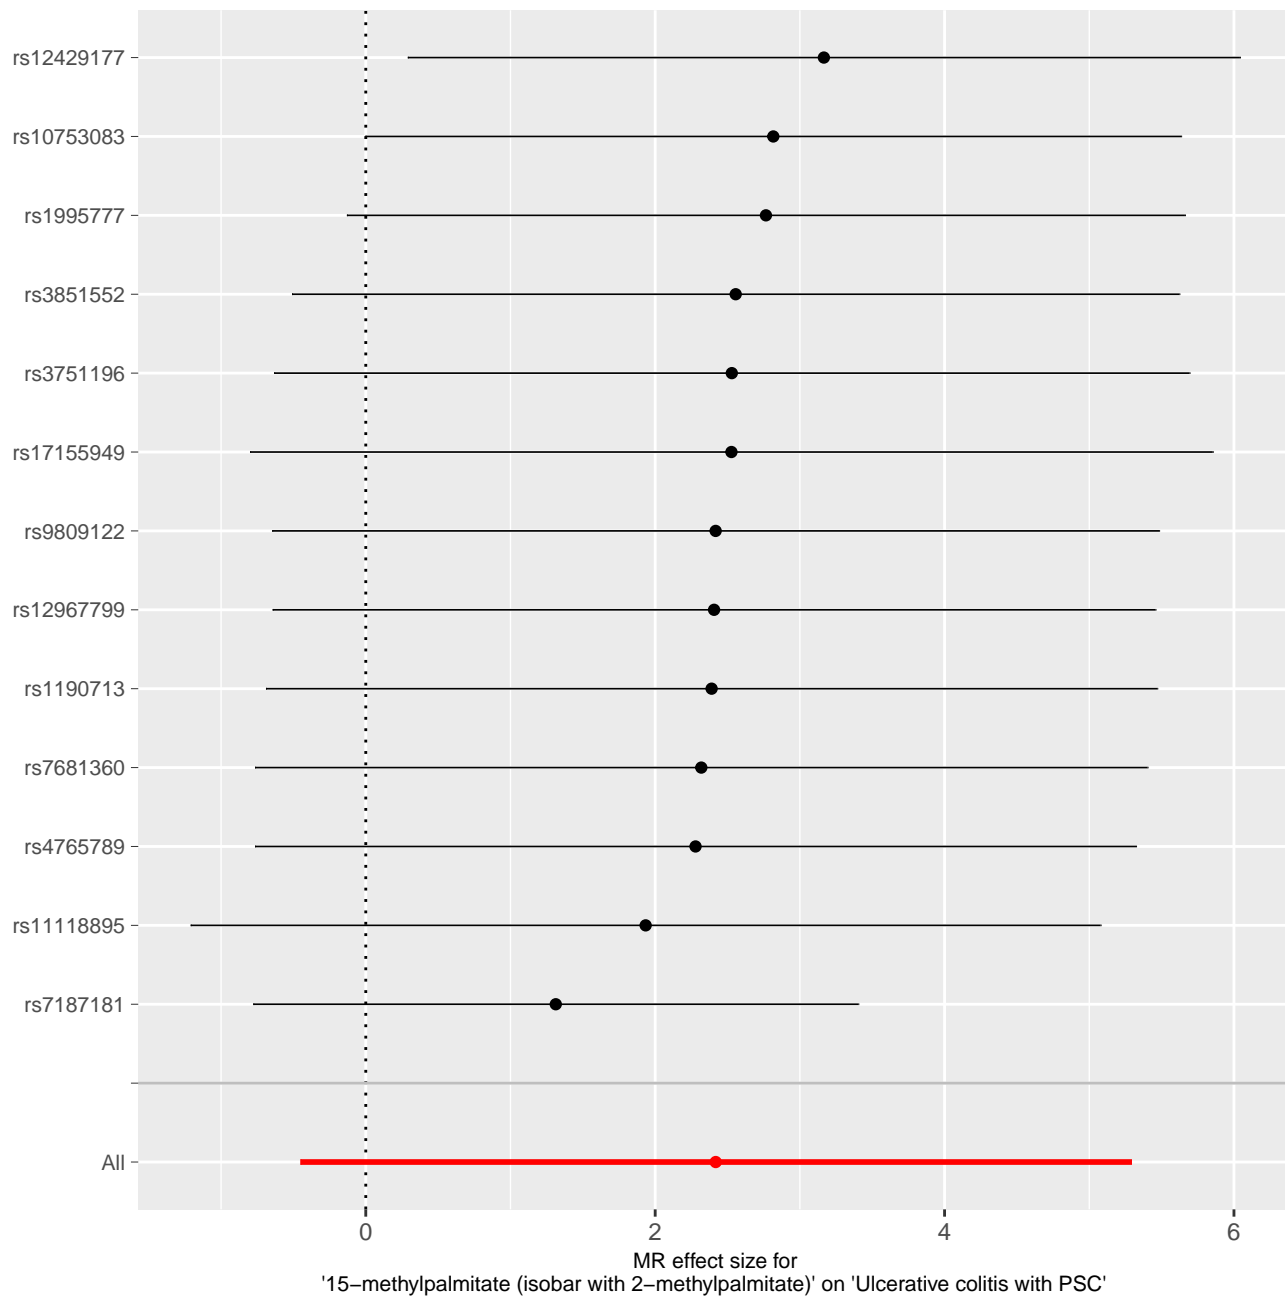

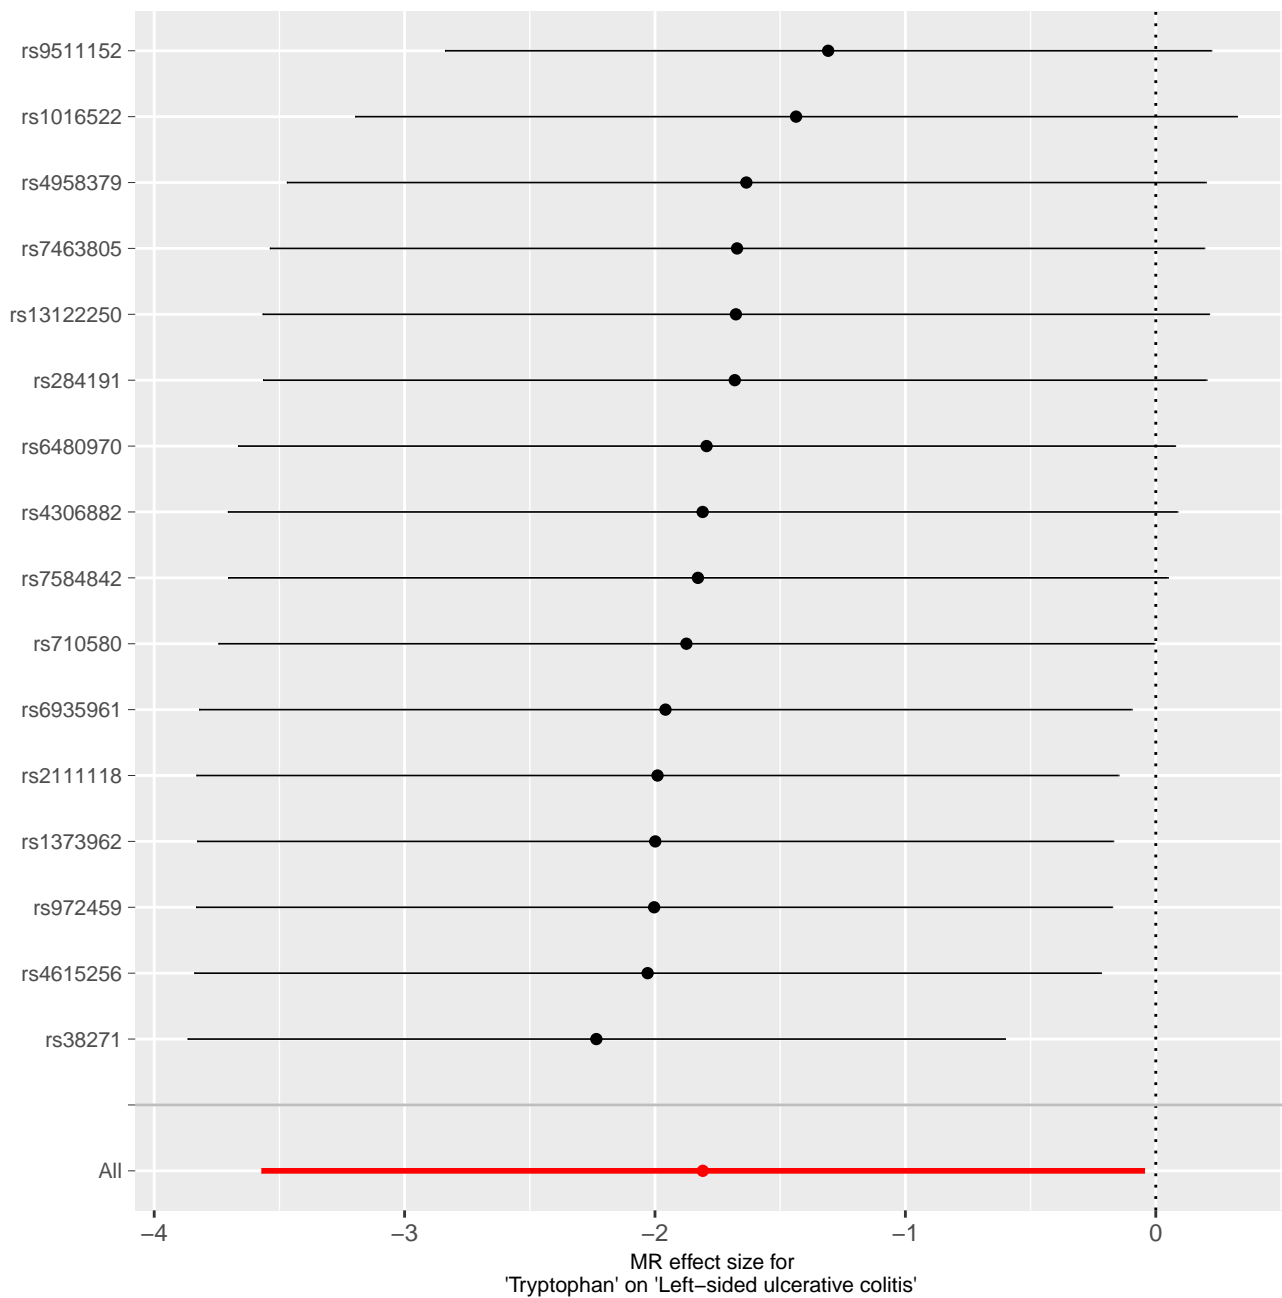



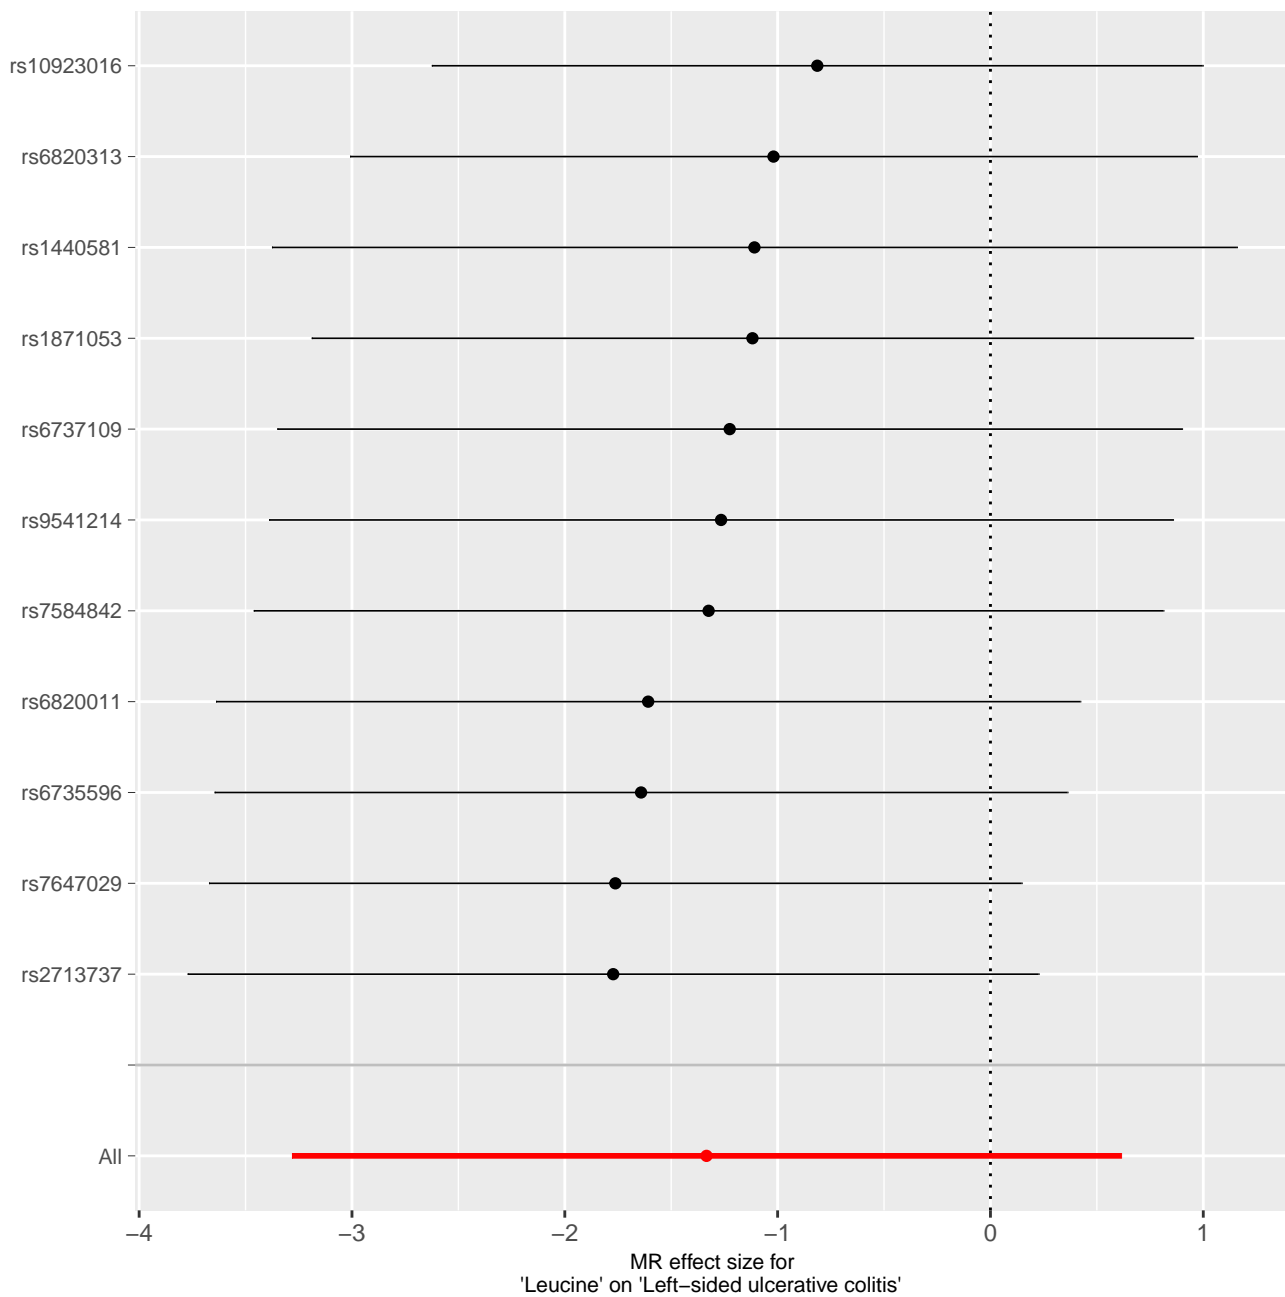

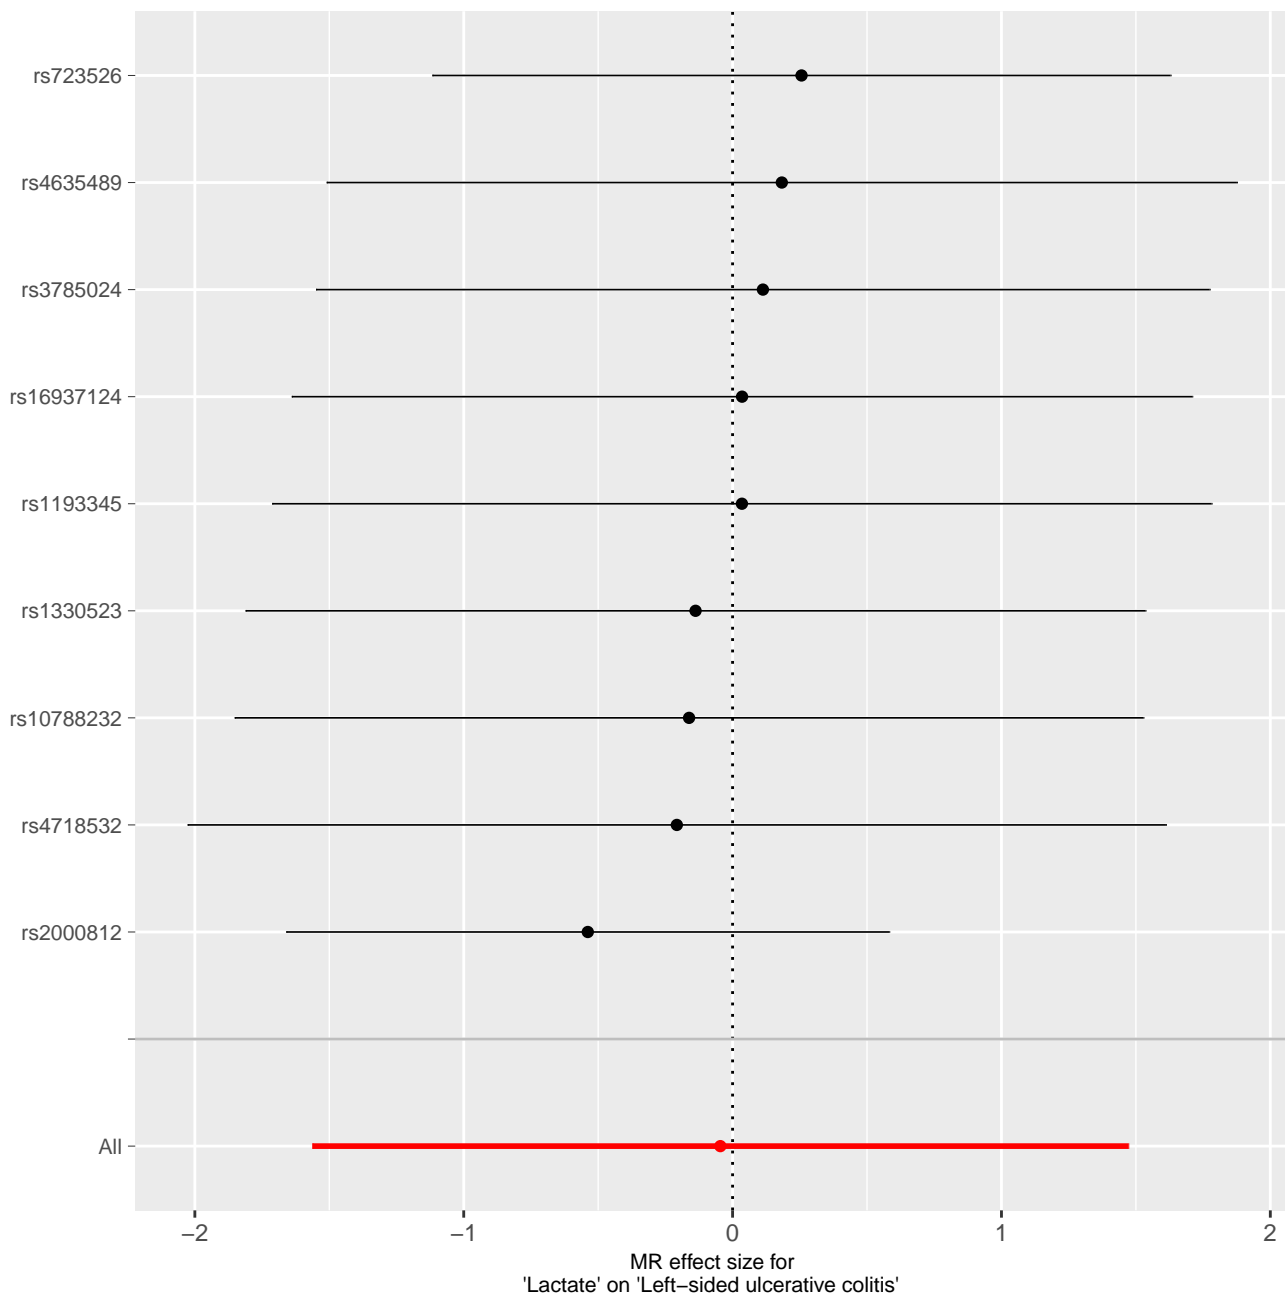

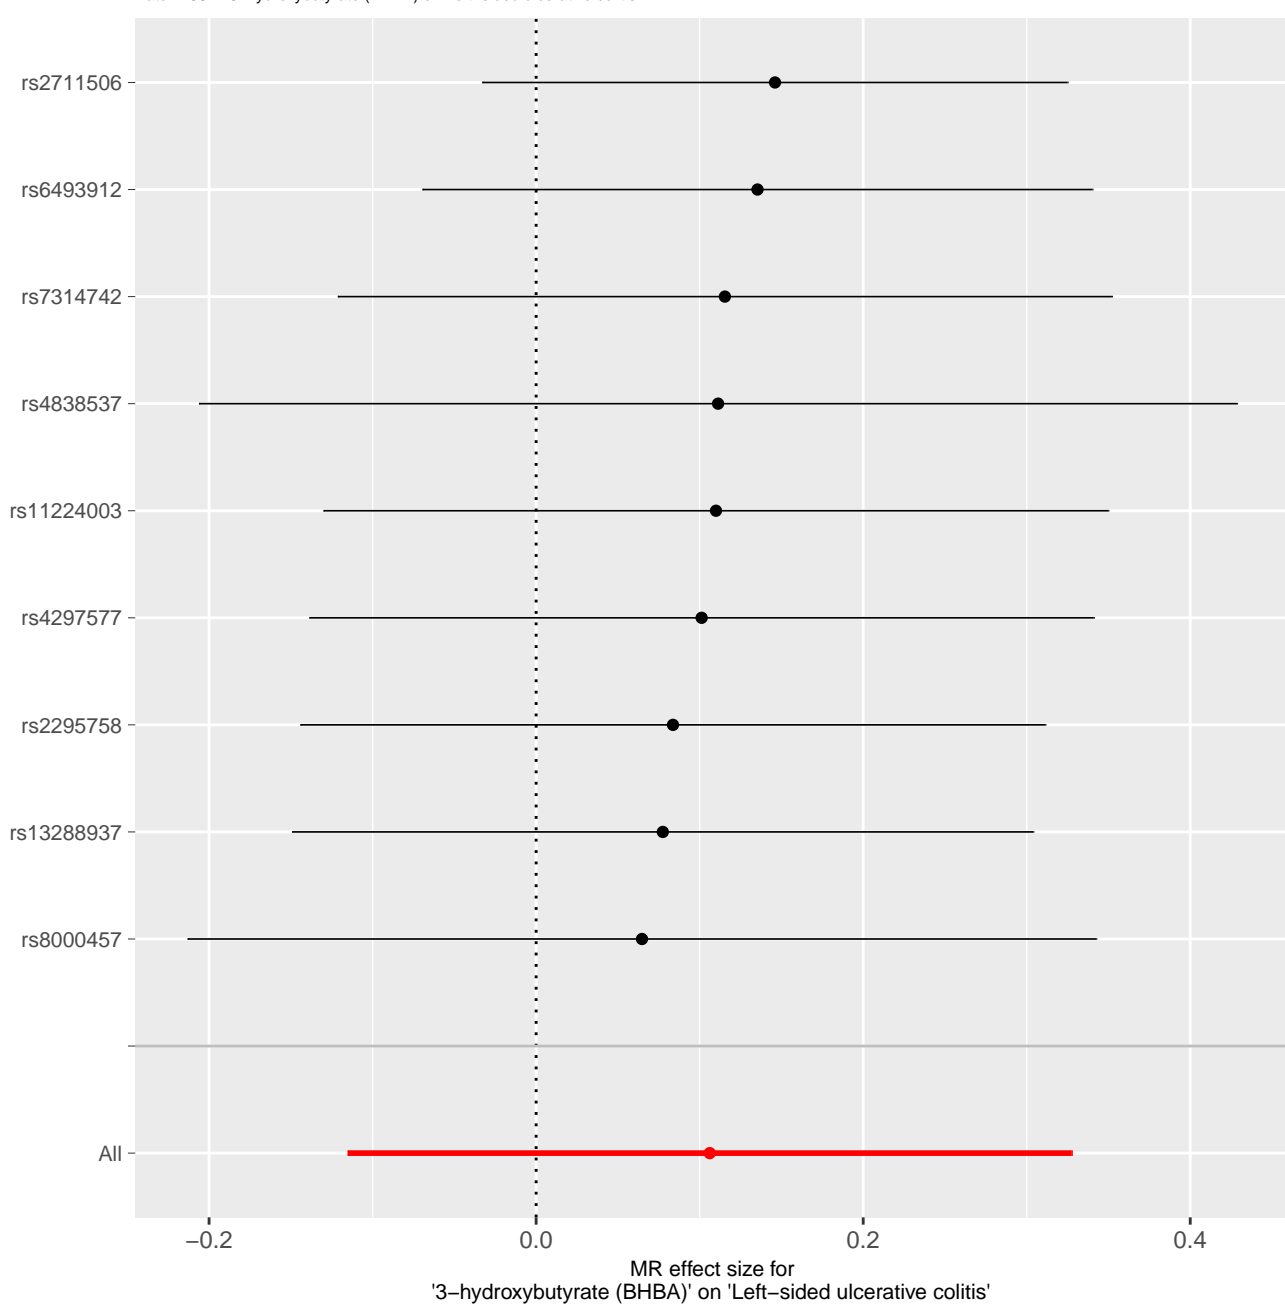

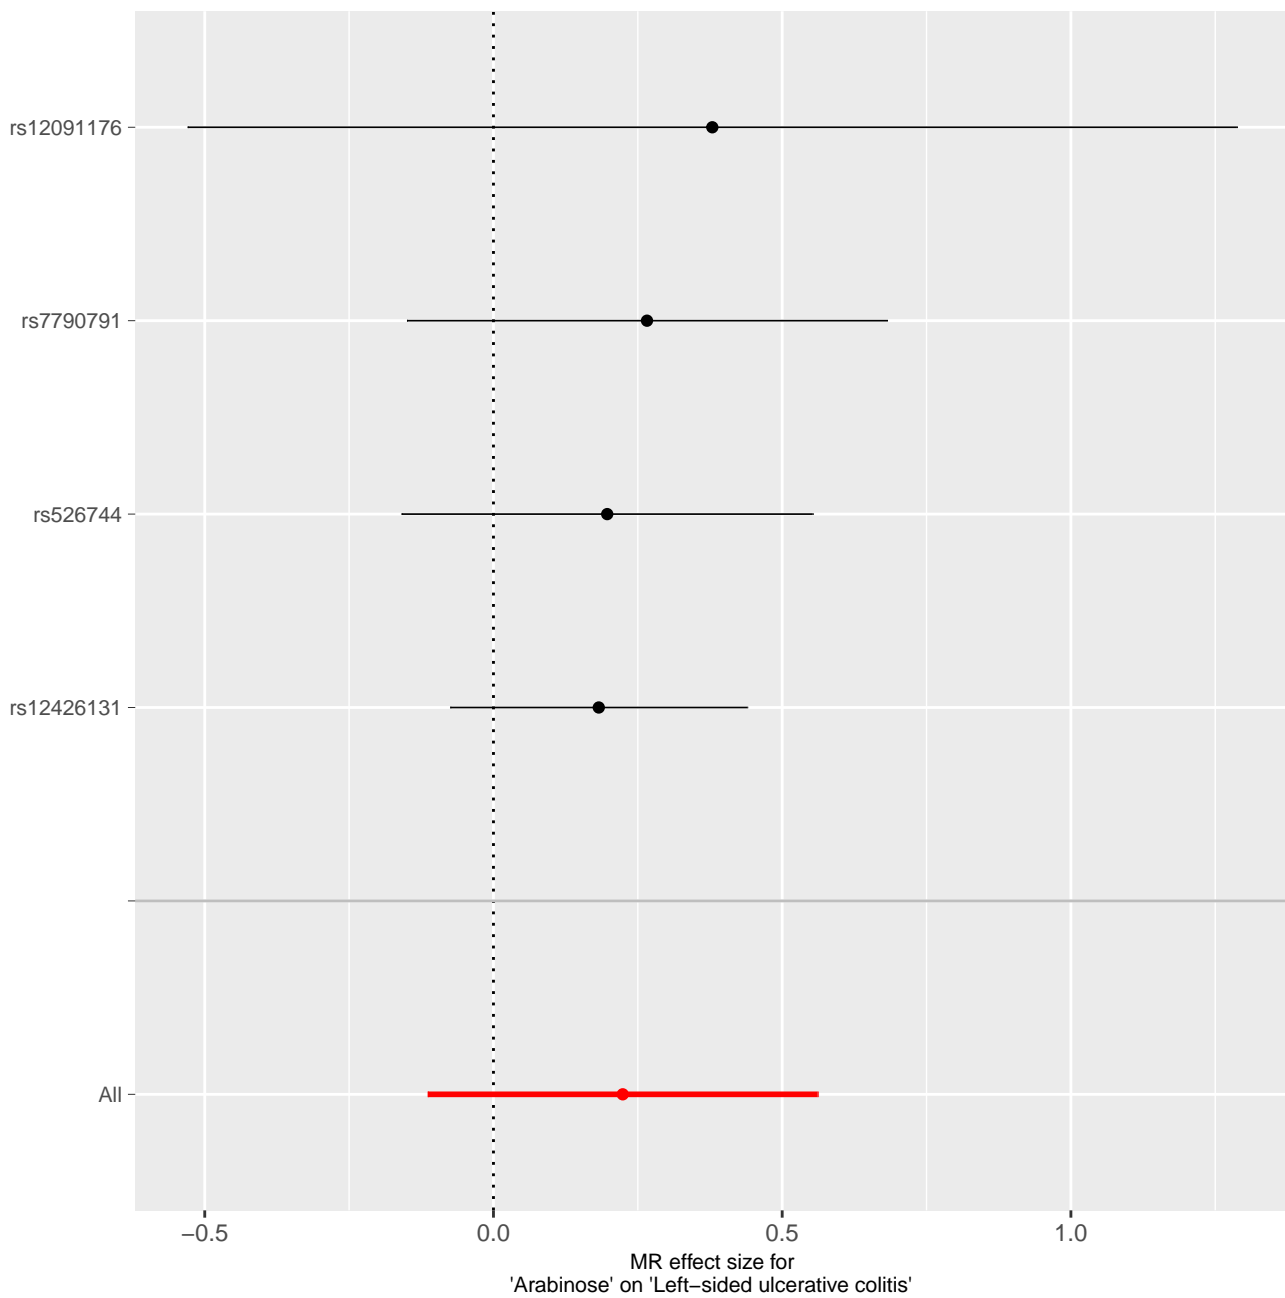

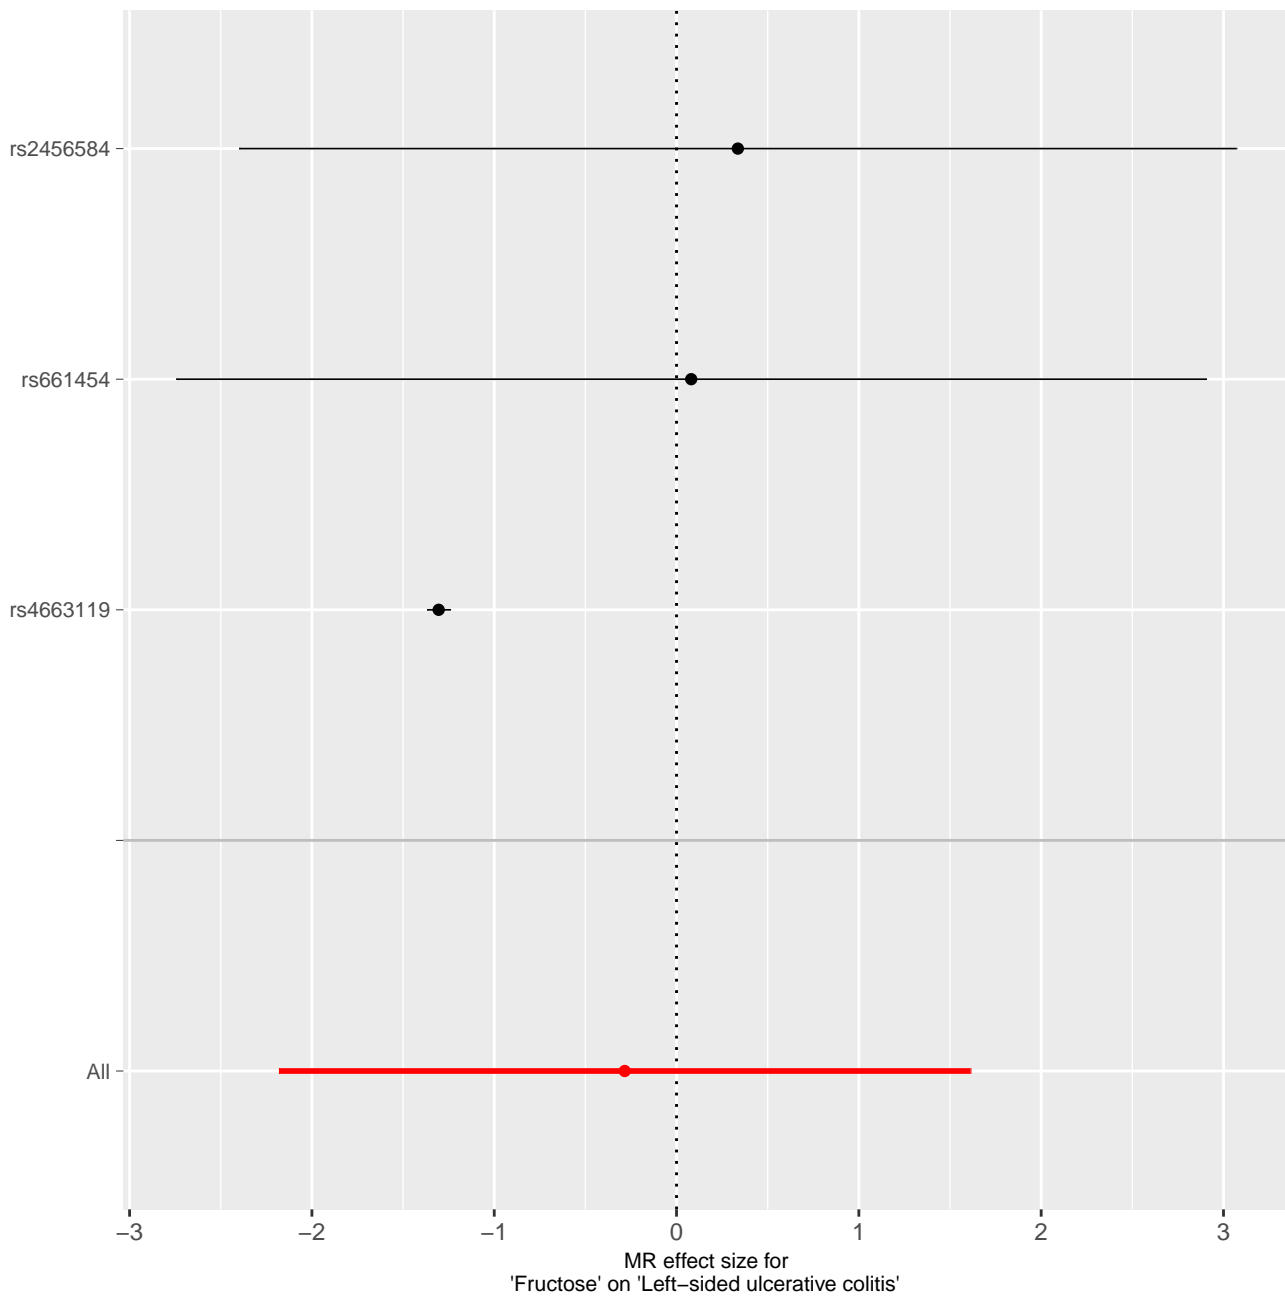

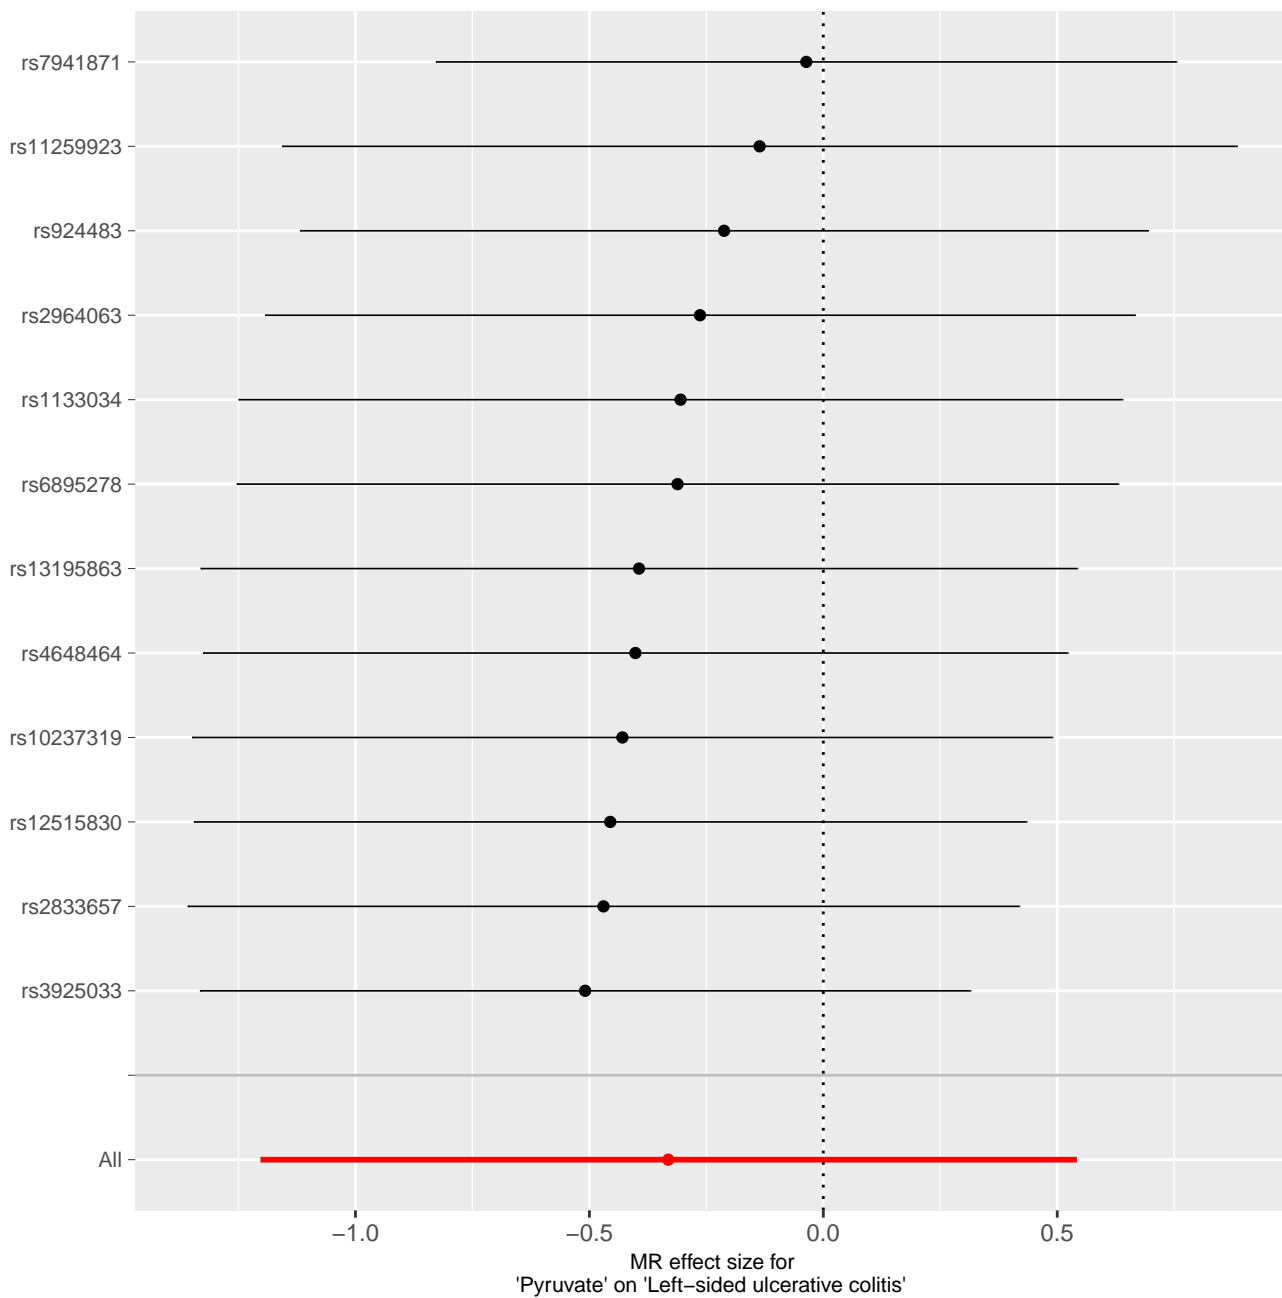

rs2686796

rs131794

rs532545

All

-5

0

5

MR effect size for  
'Uridine' on 'Left-sided ulcerative colitis'

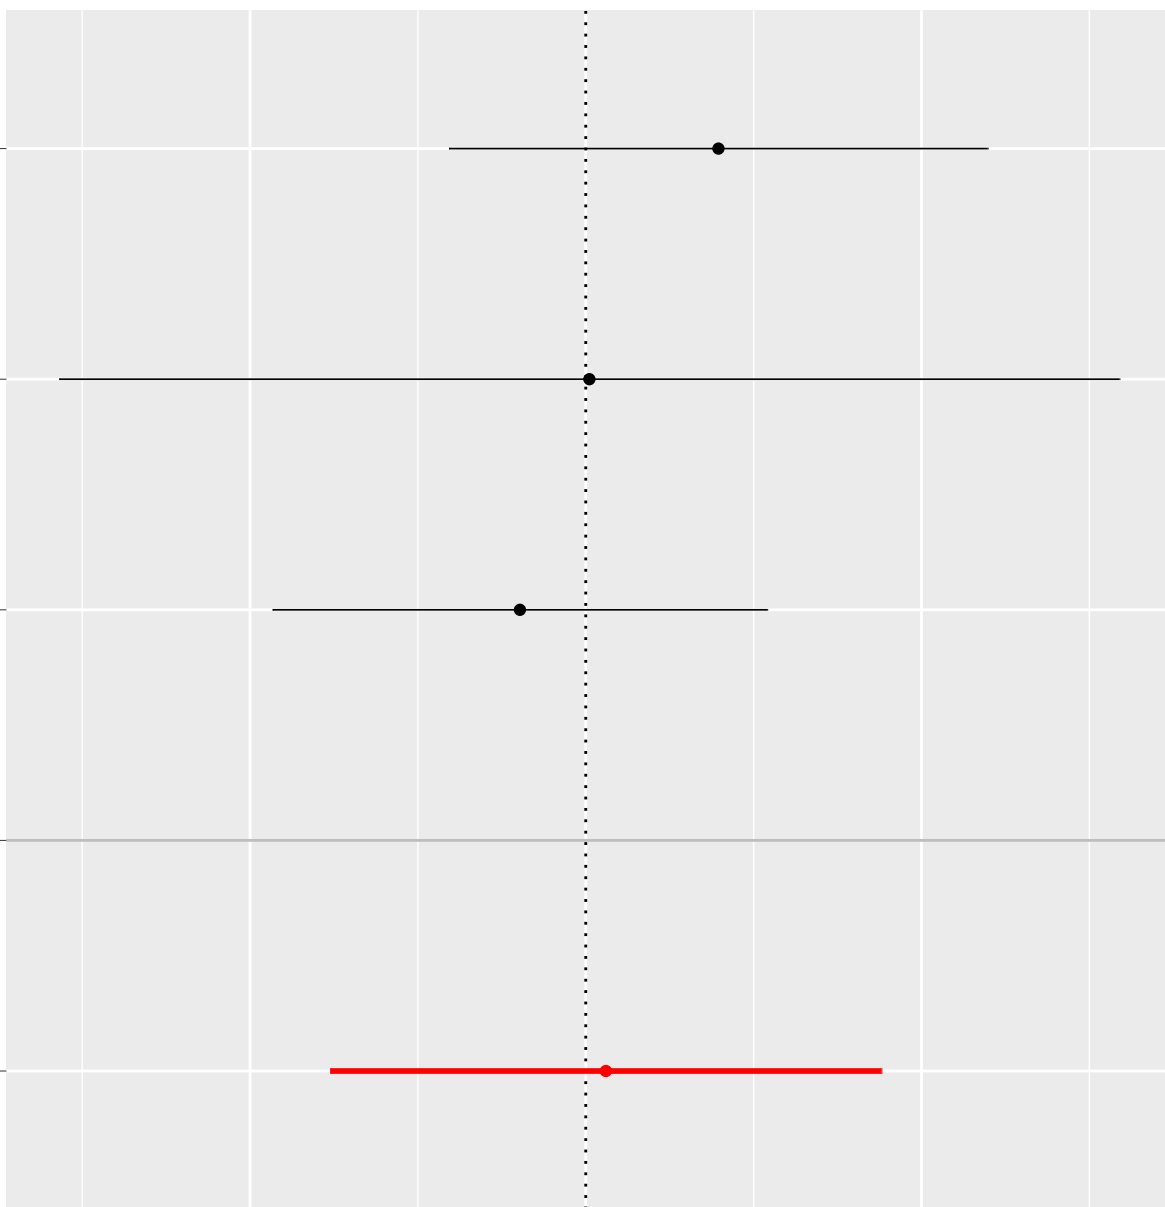

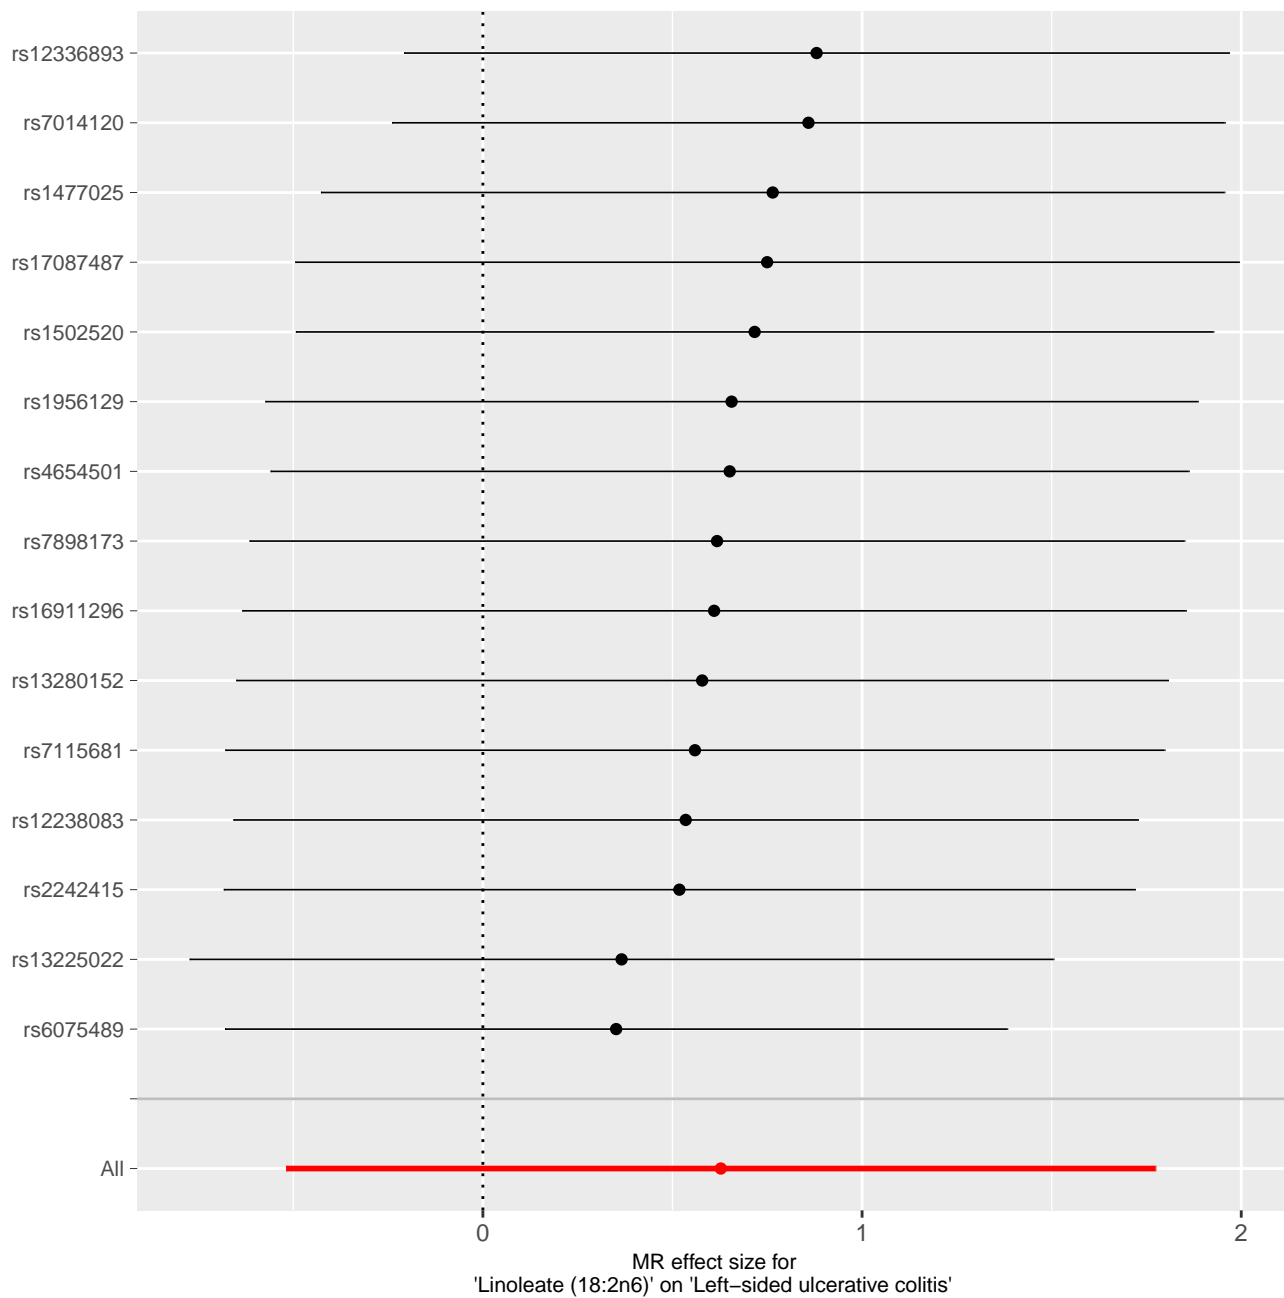



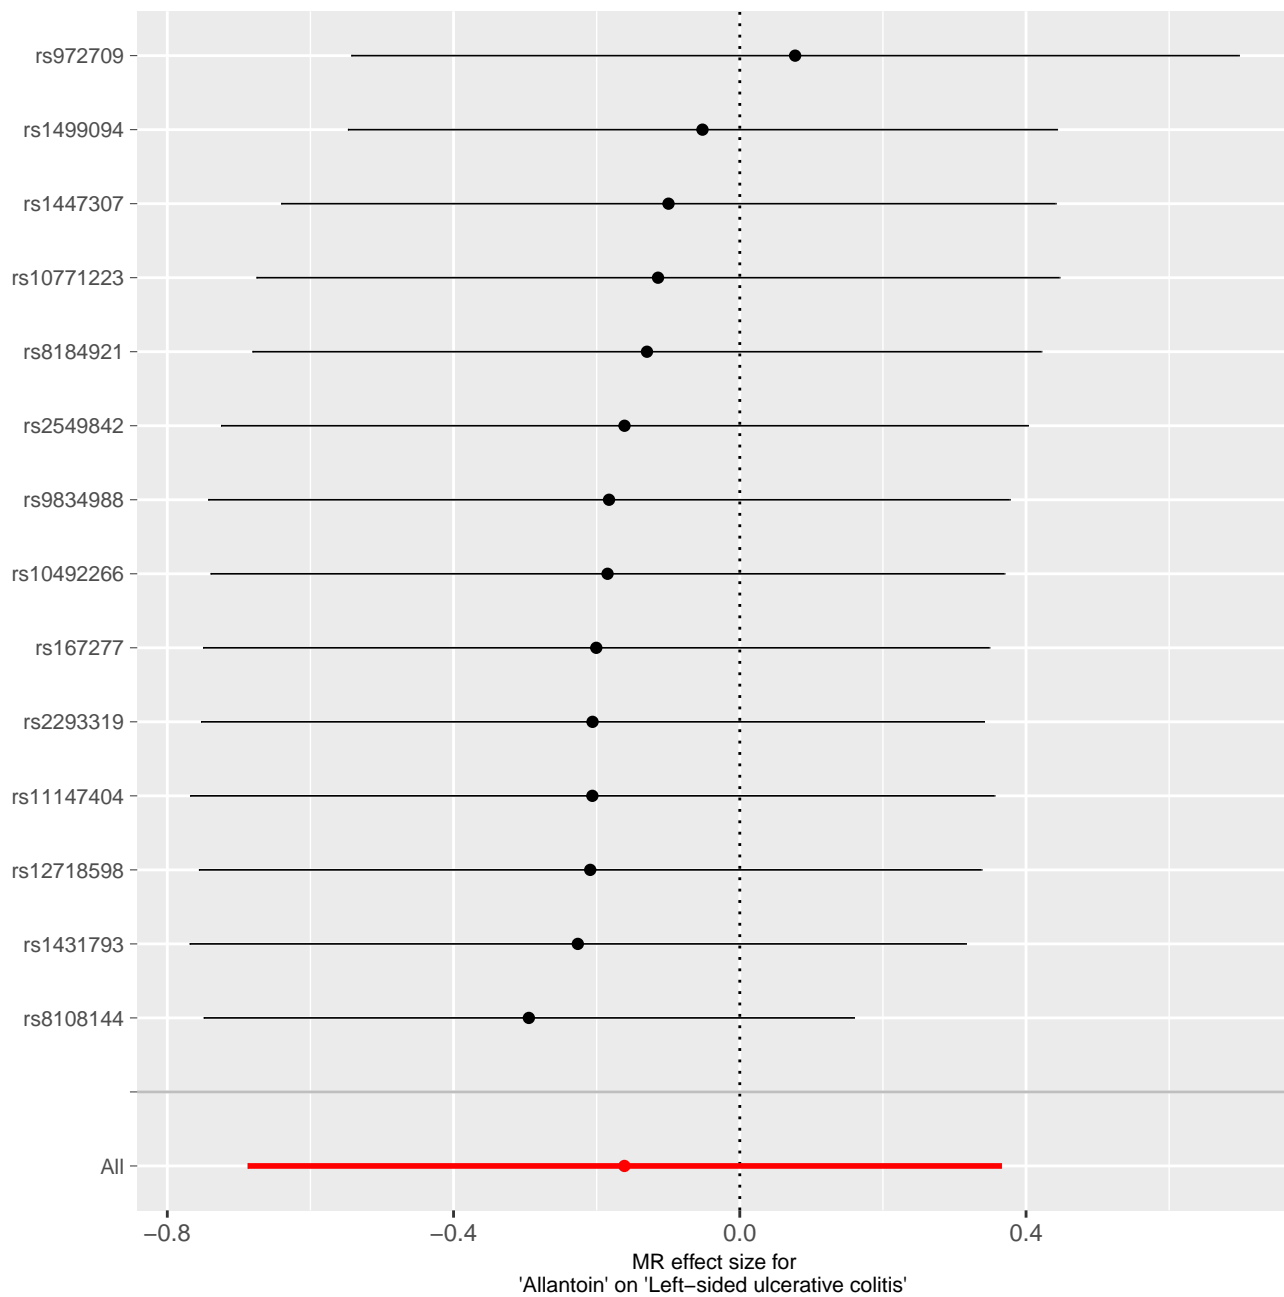

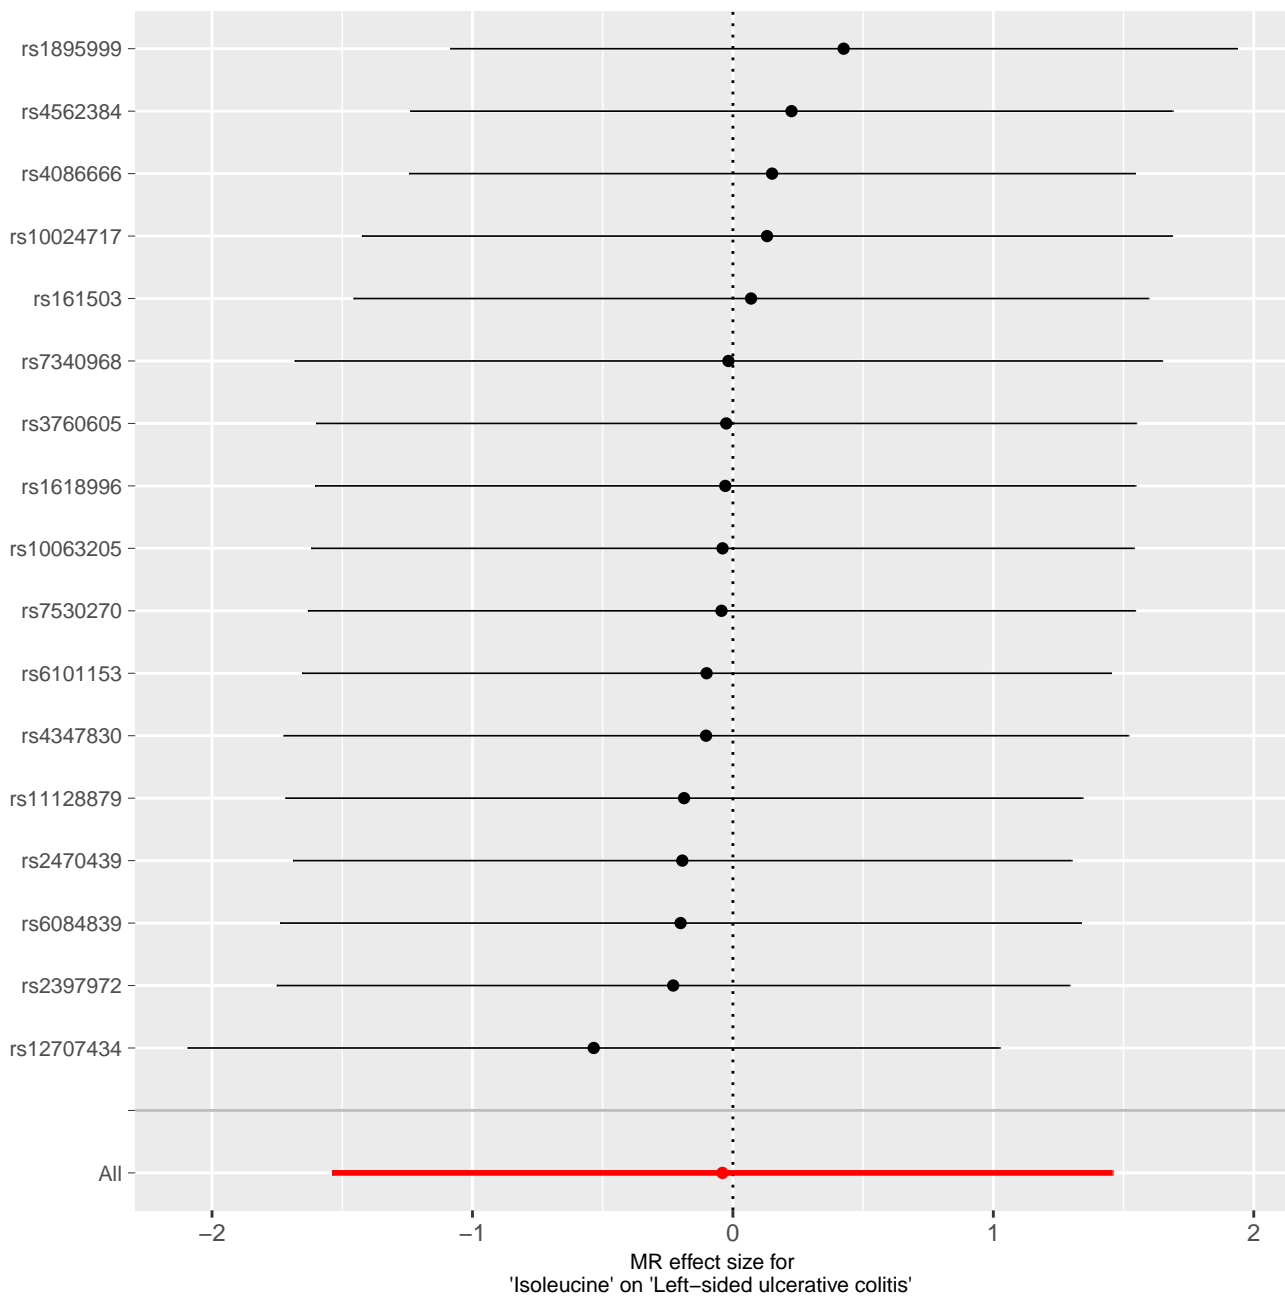

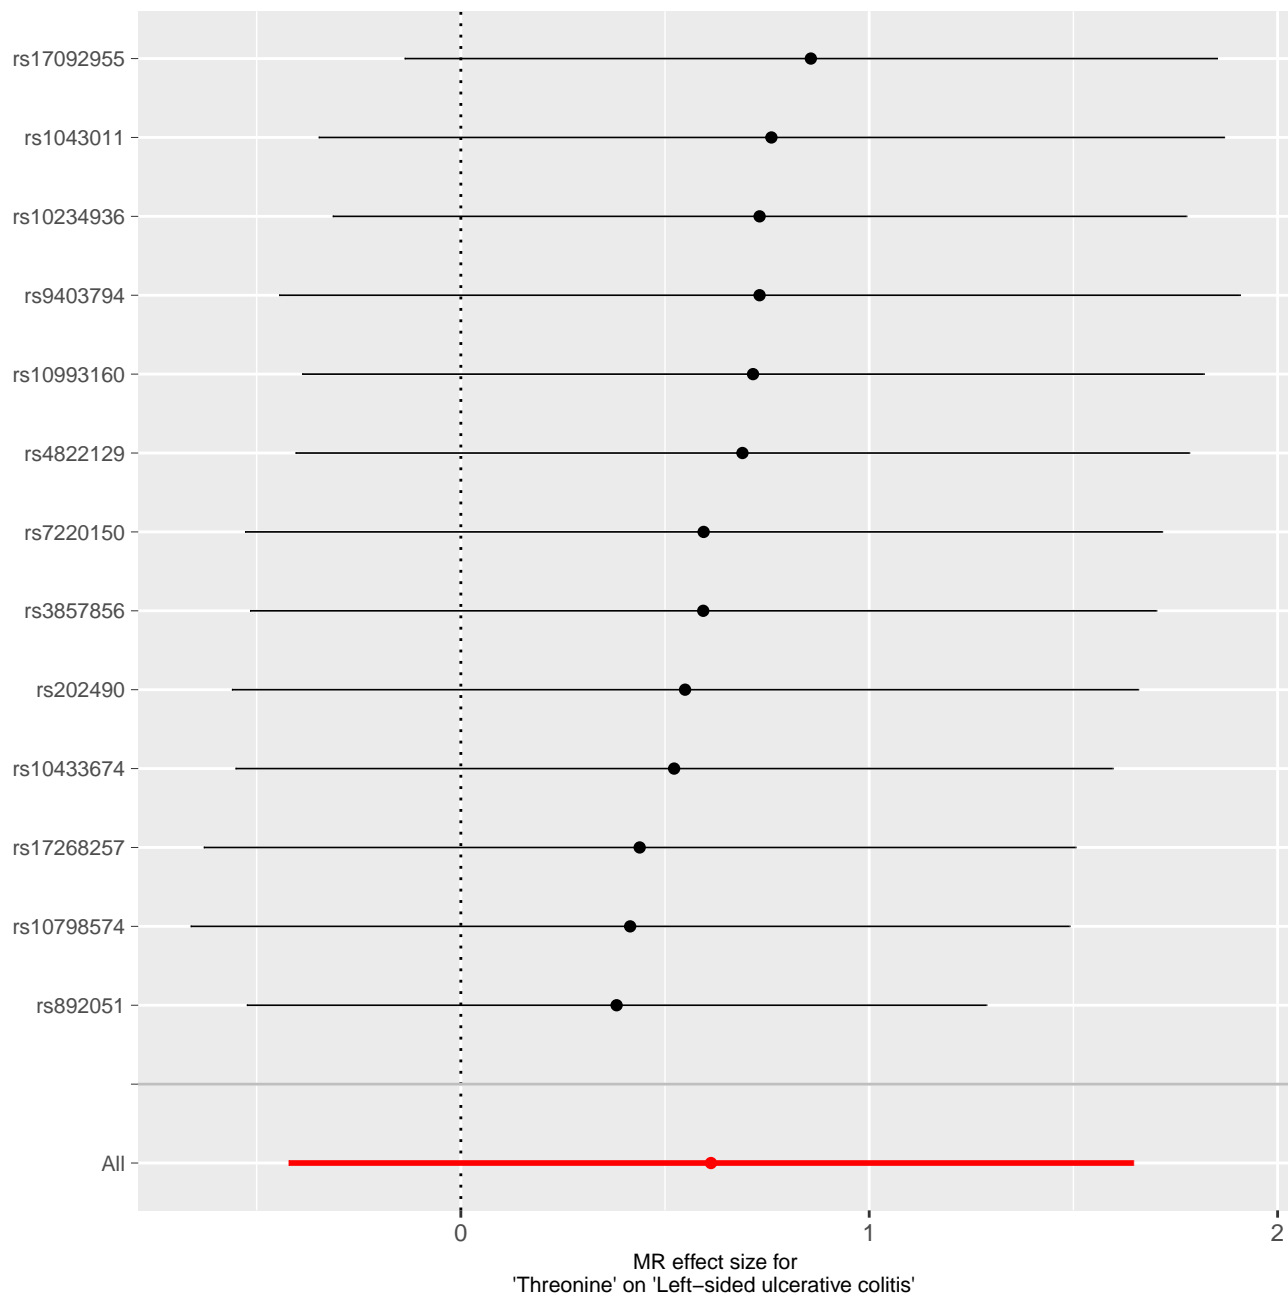

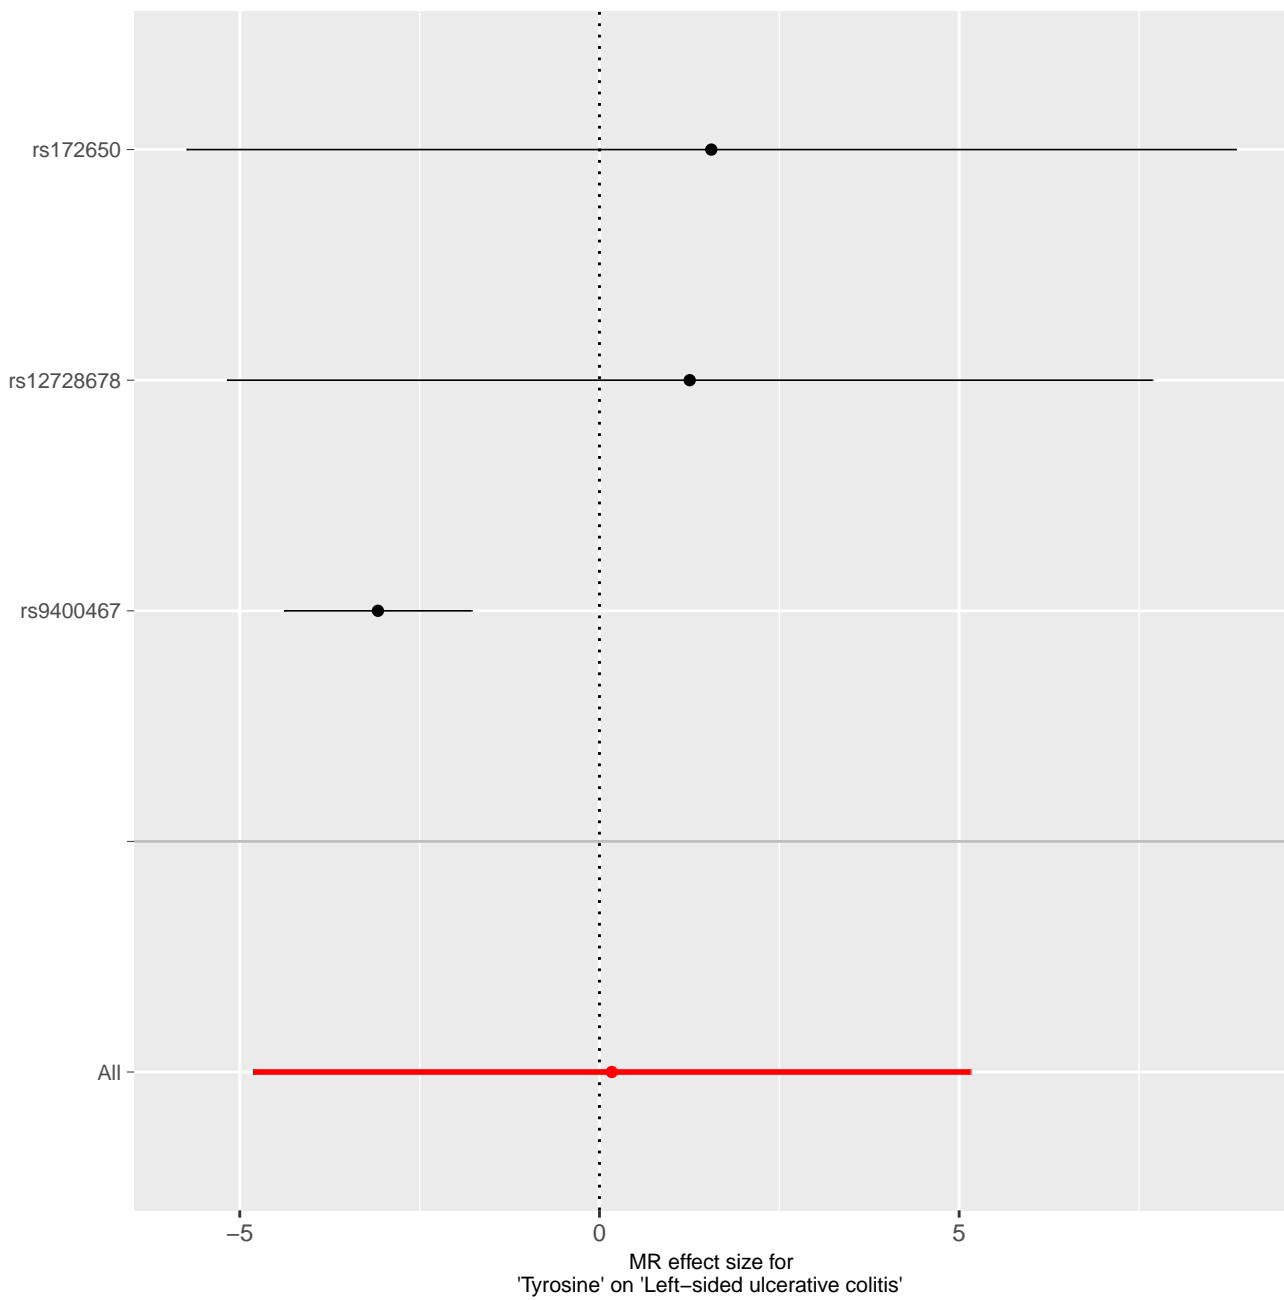

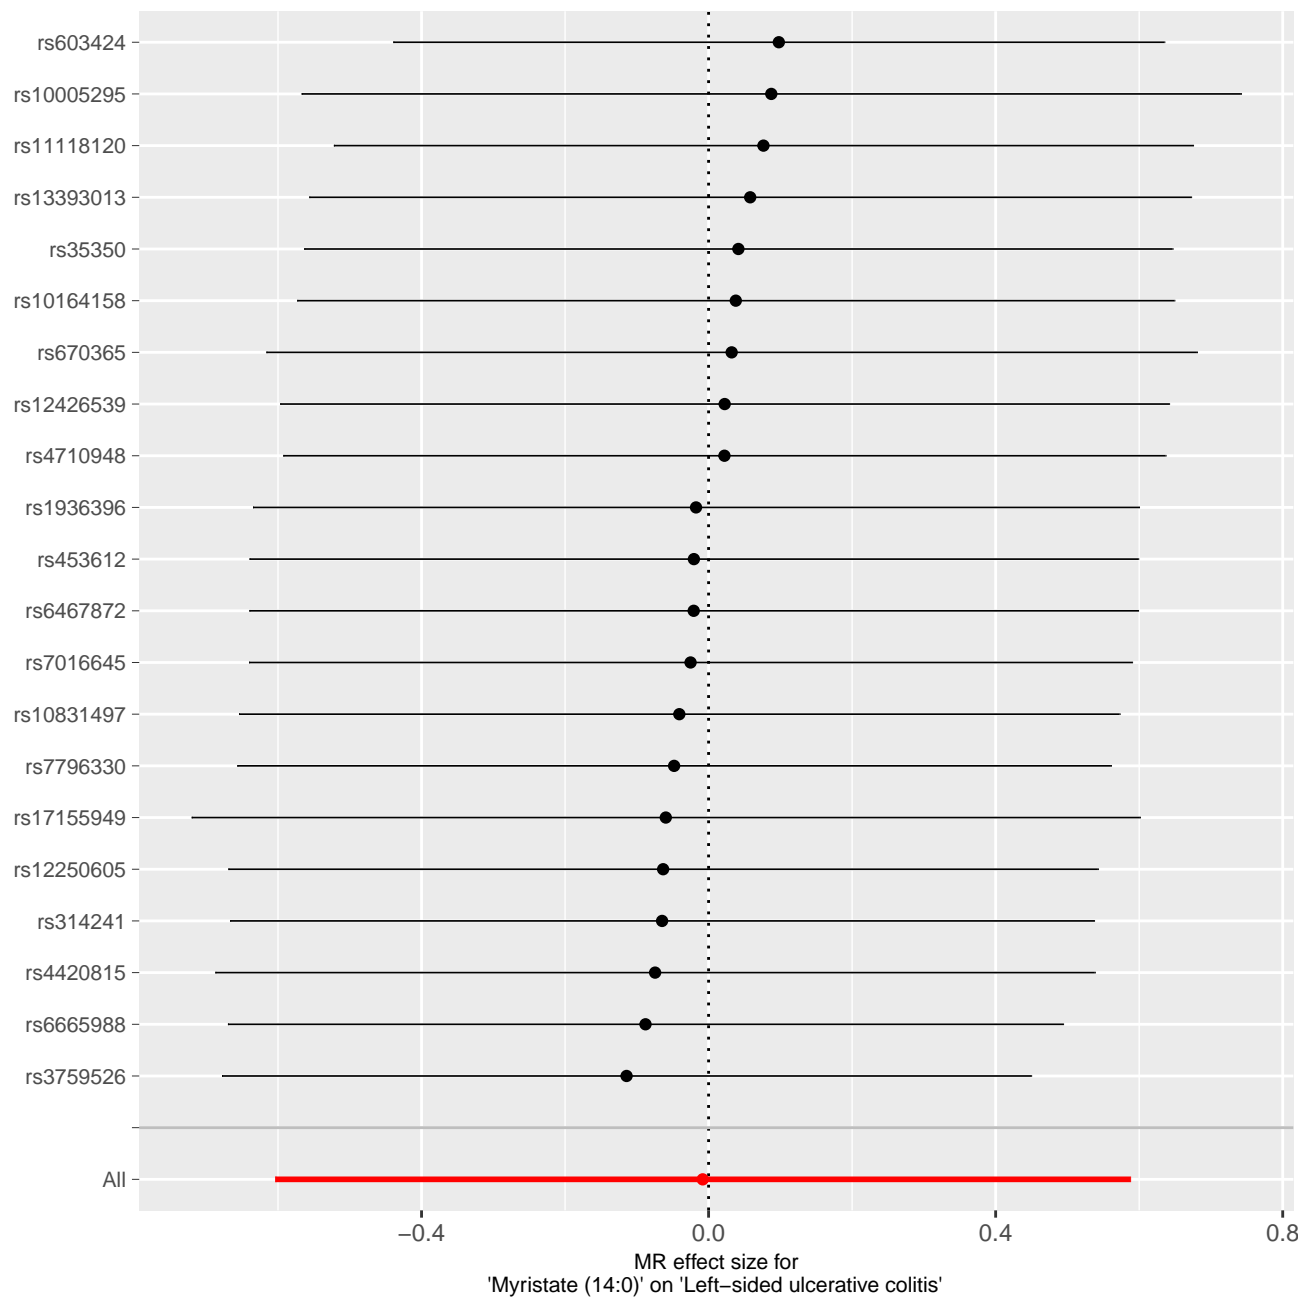

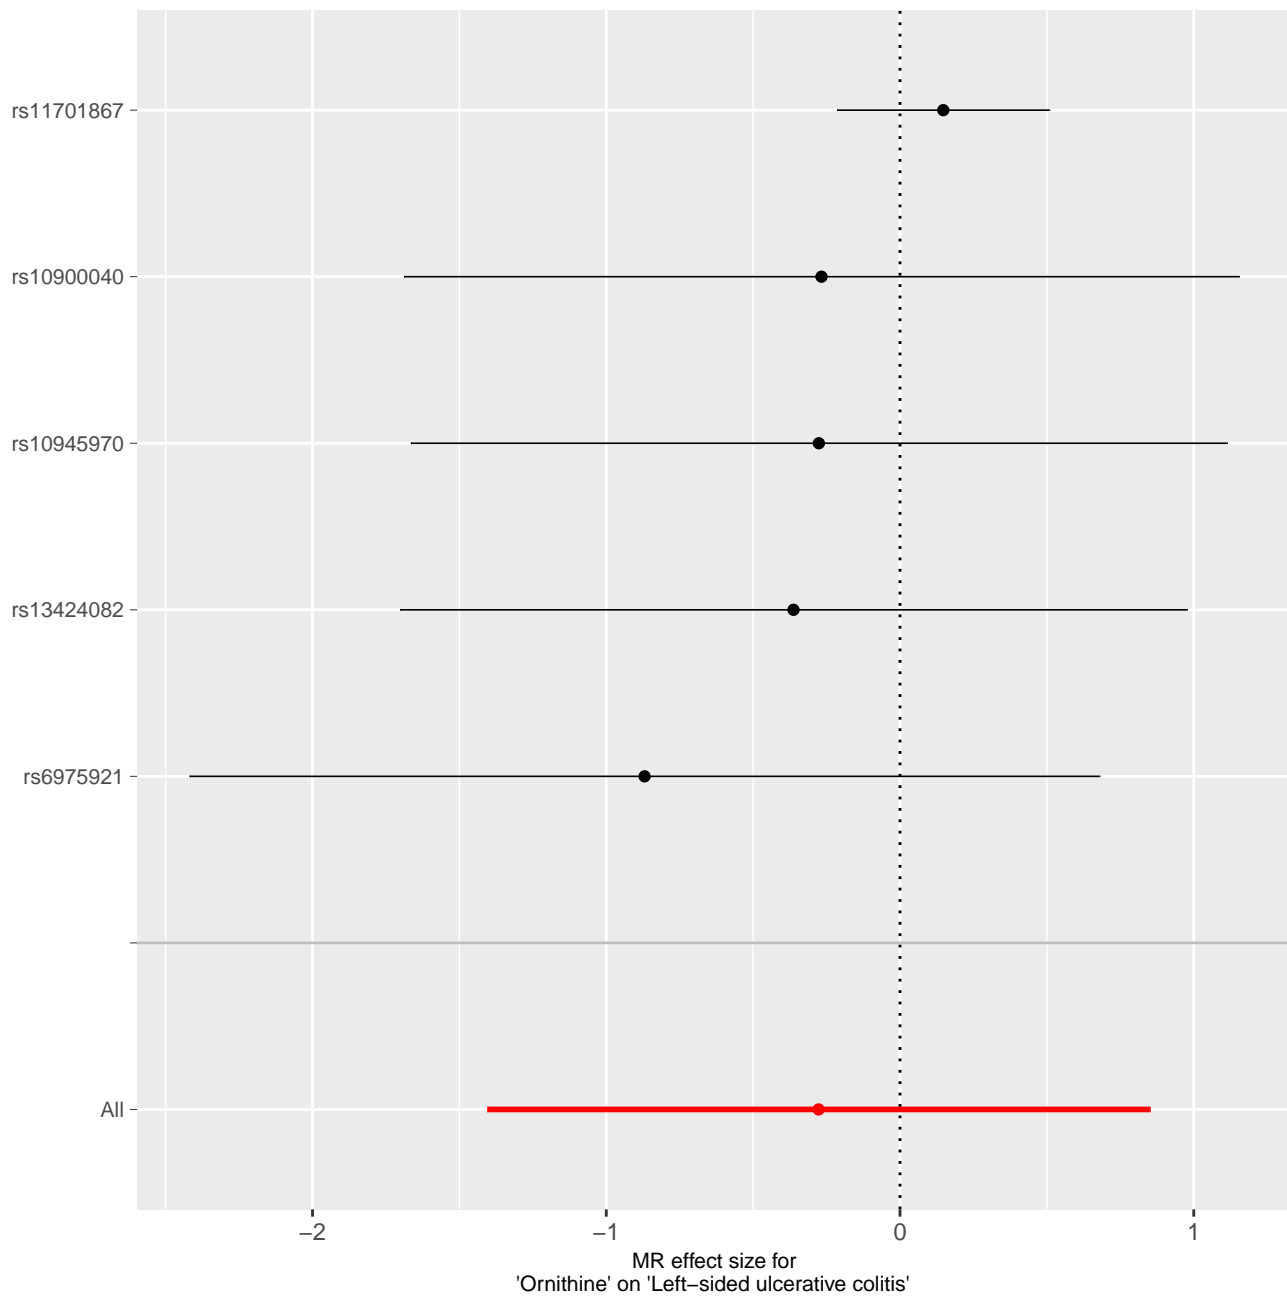

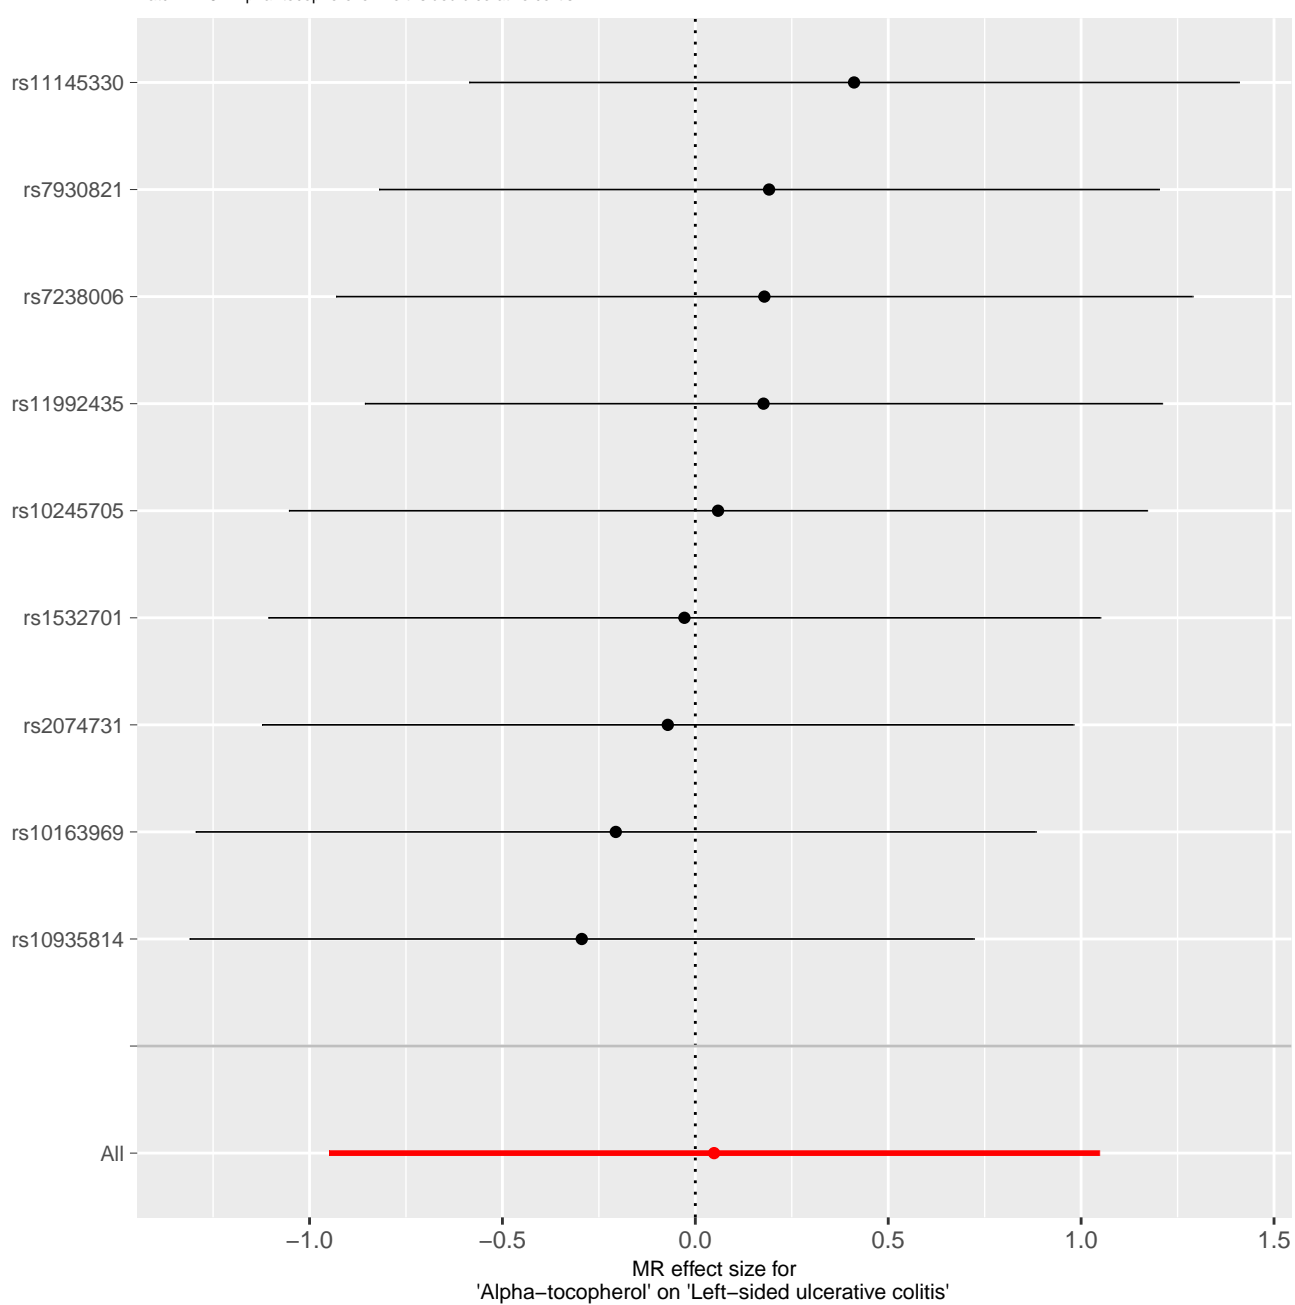

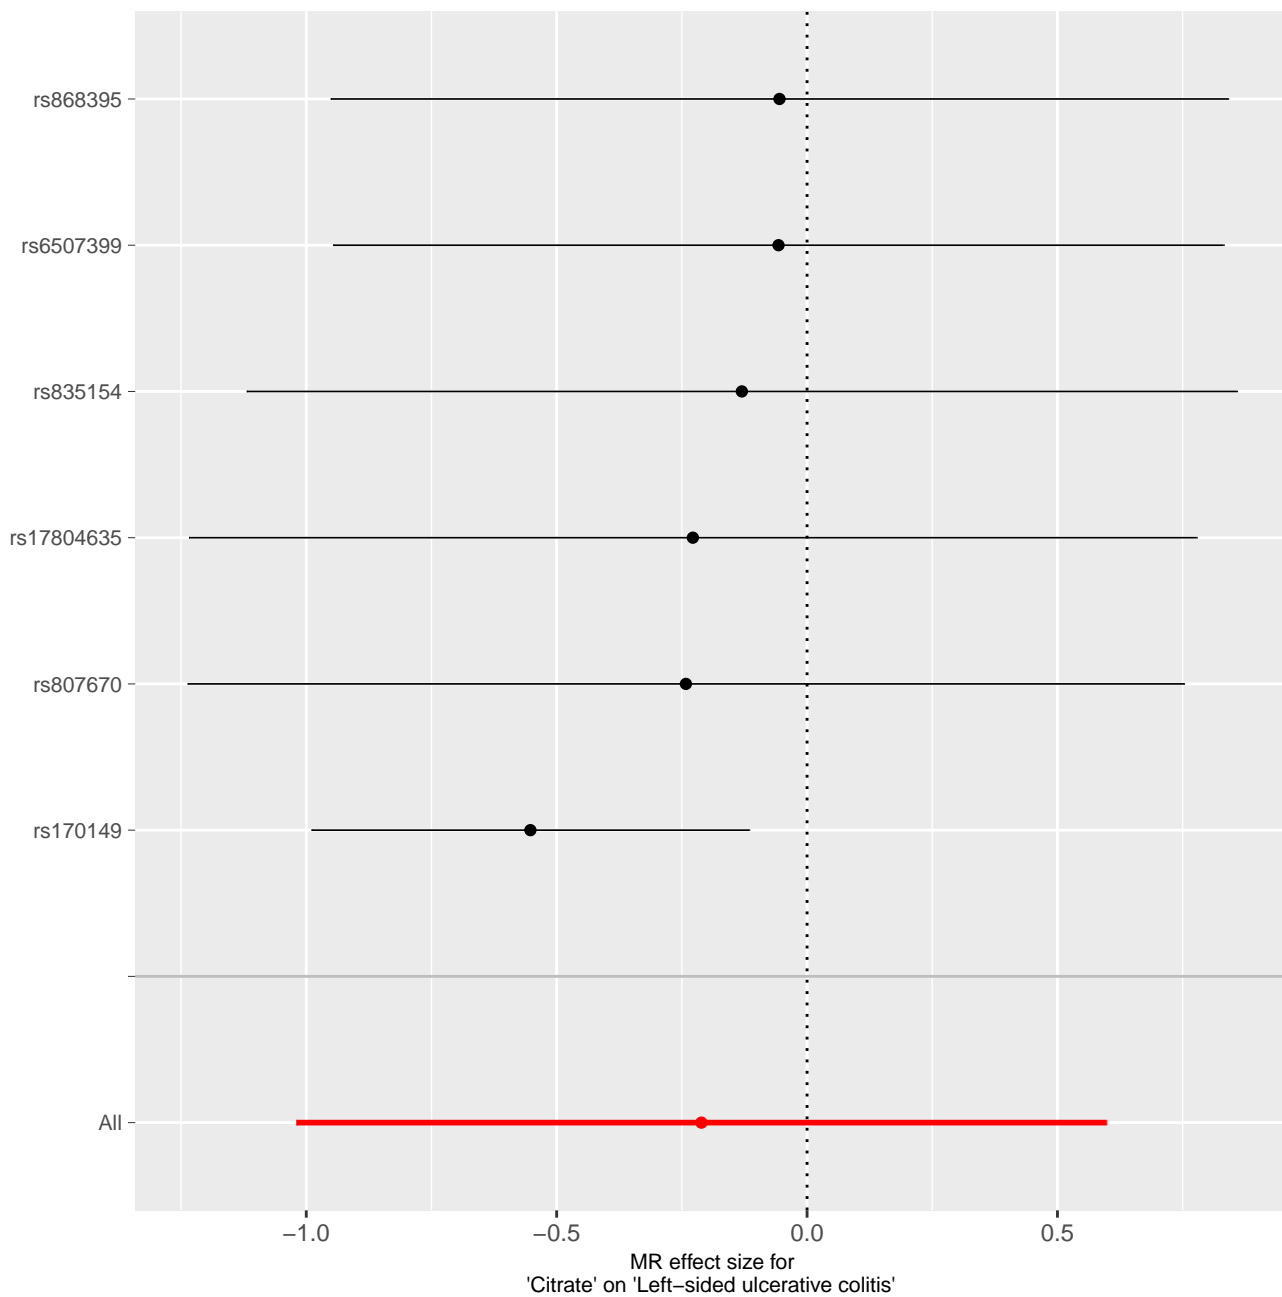



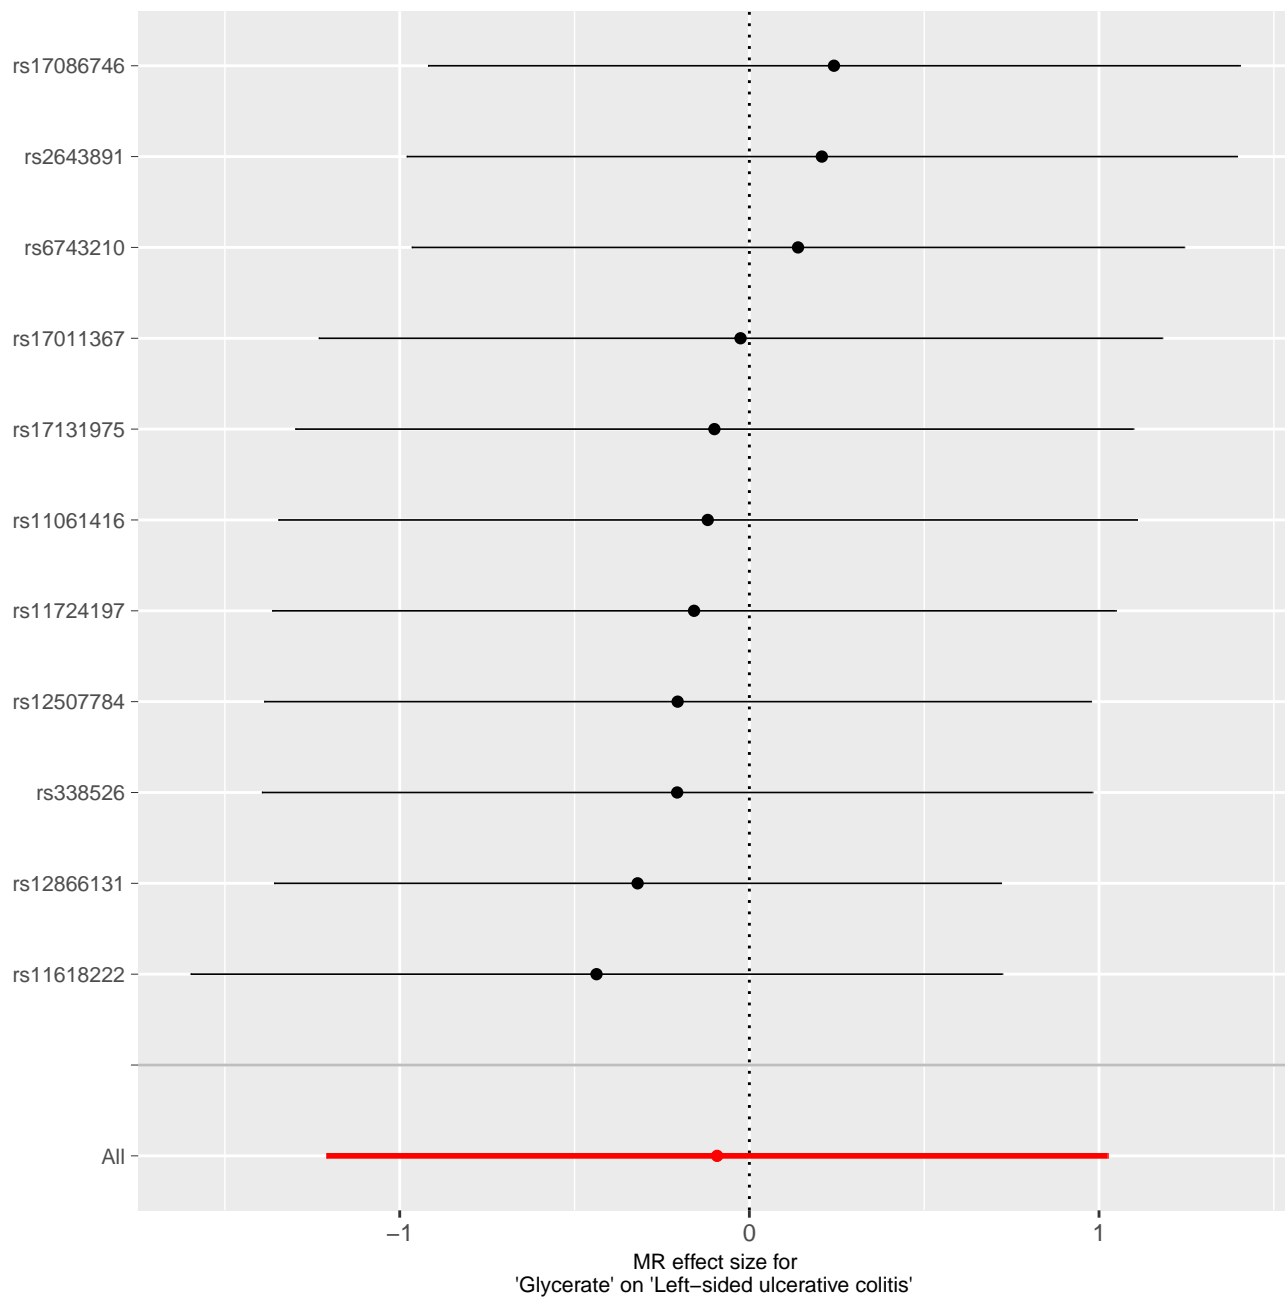

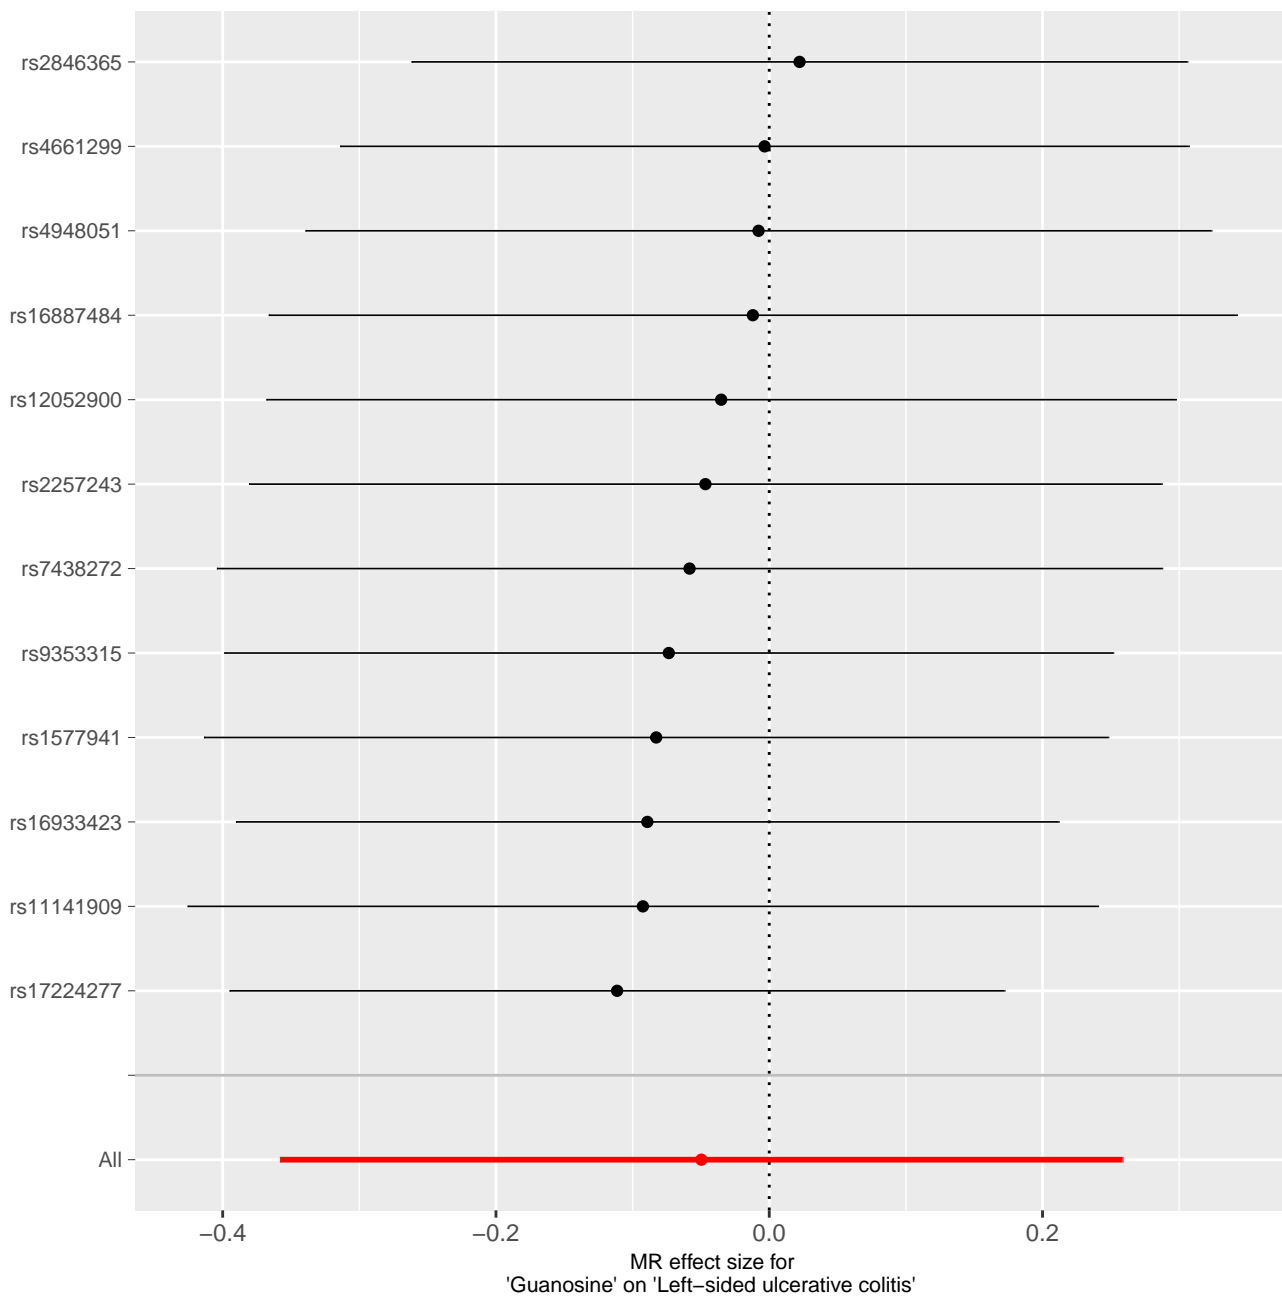

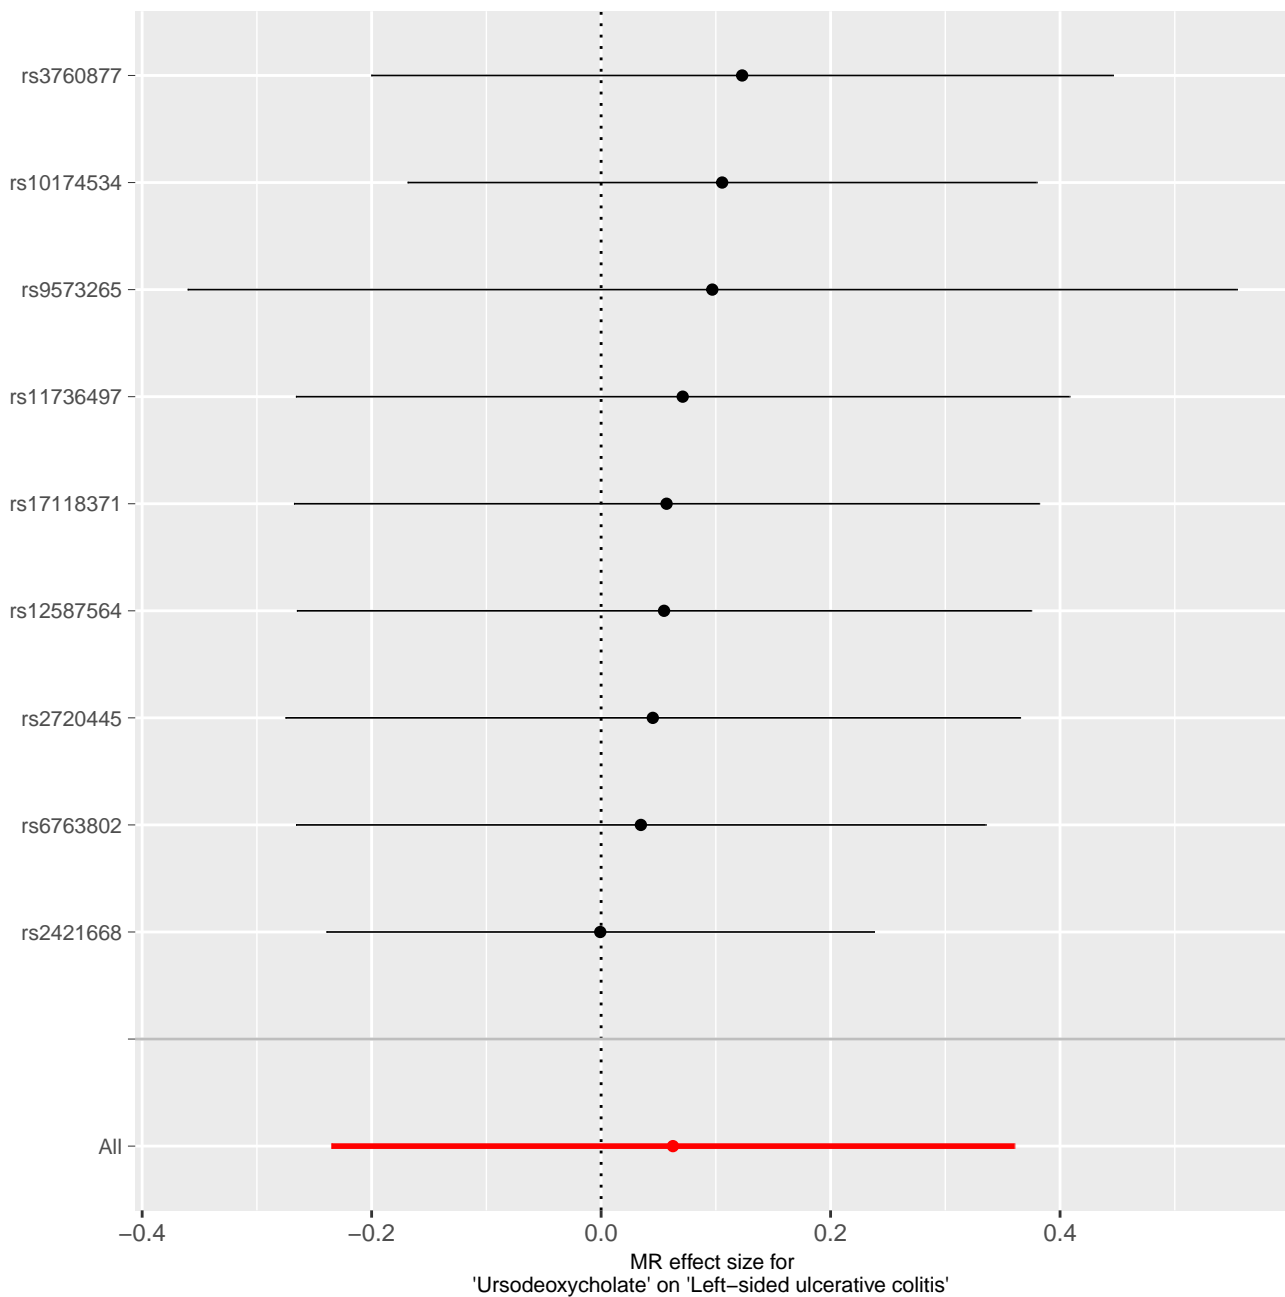

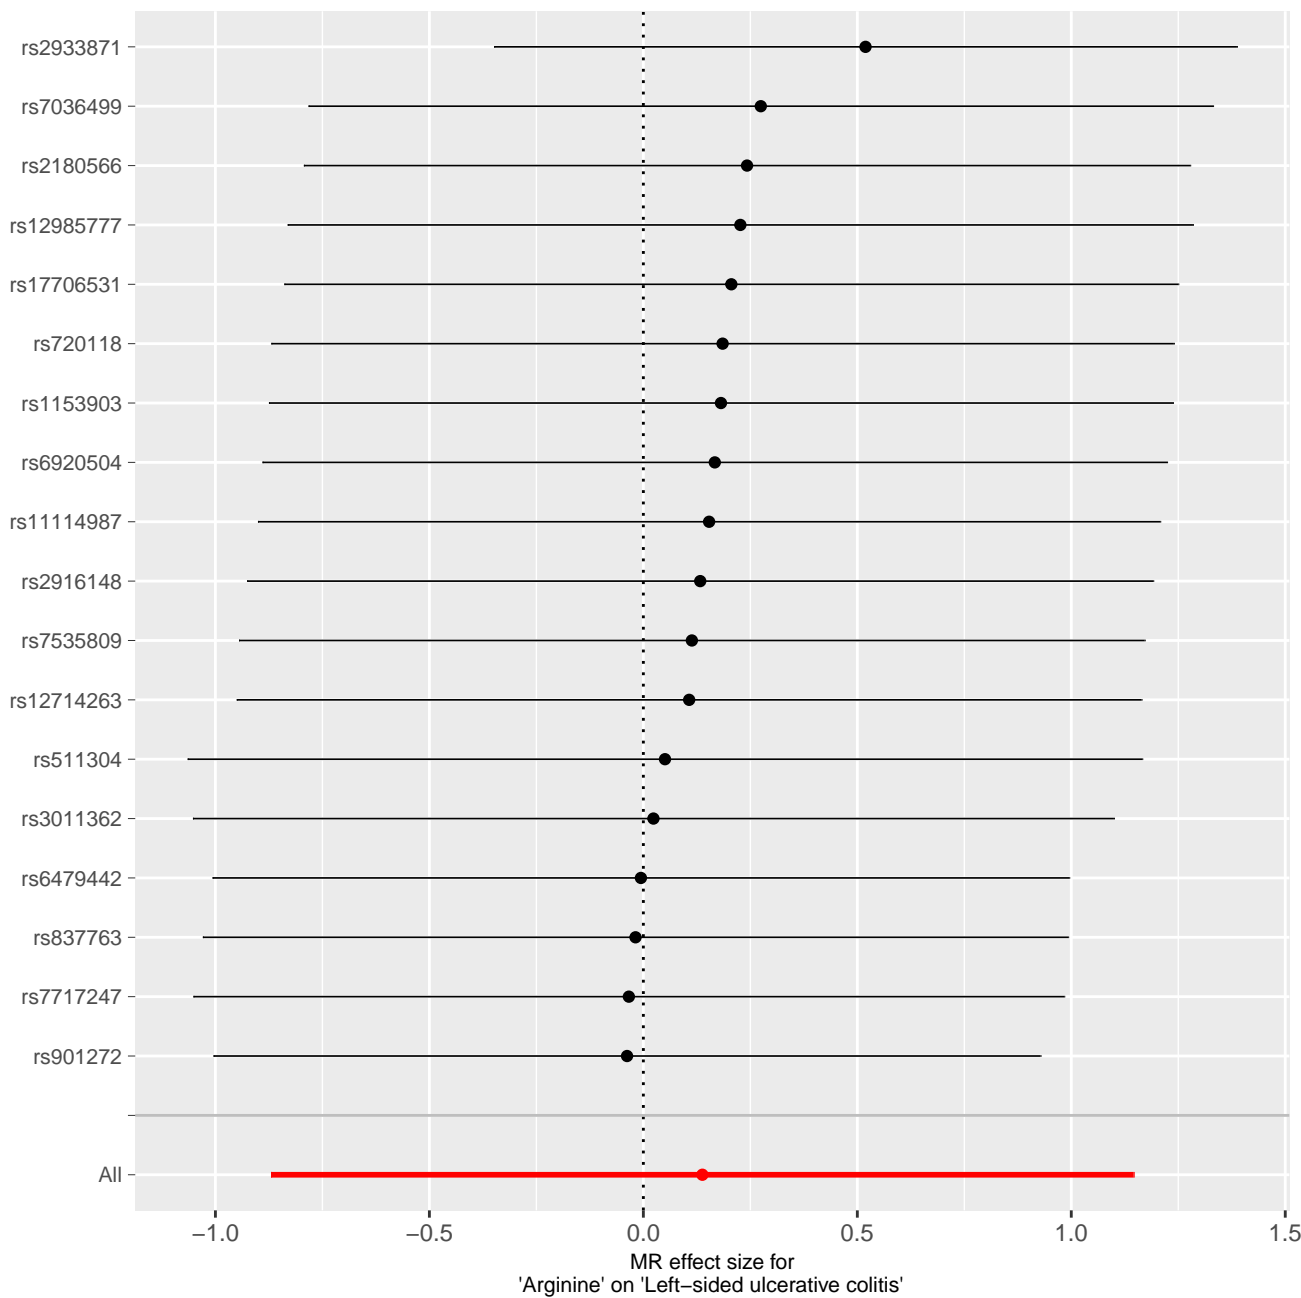

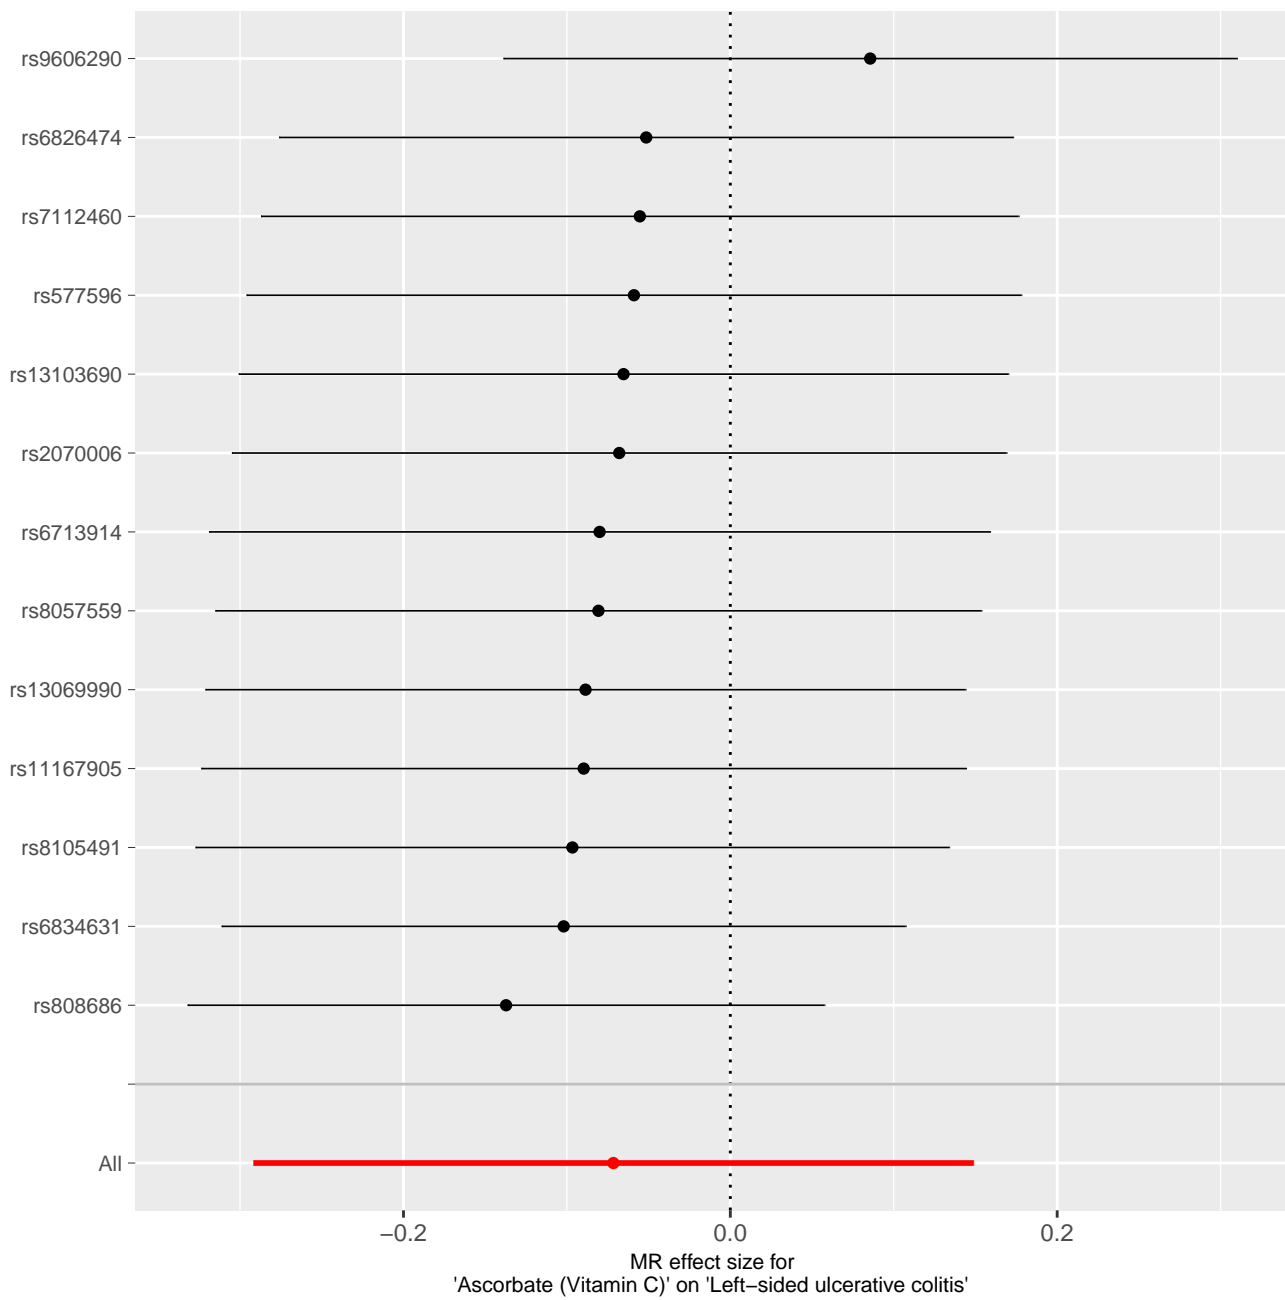

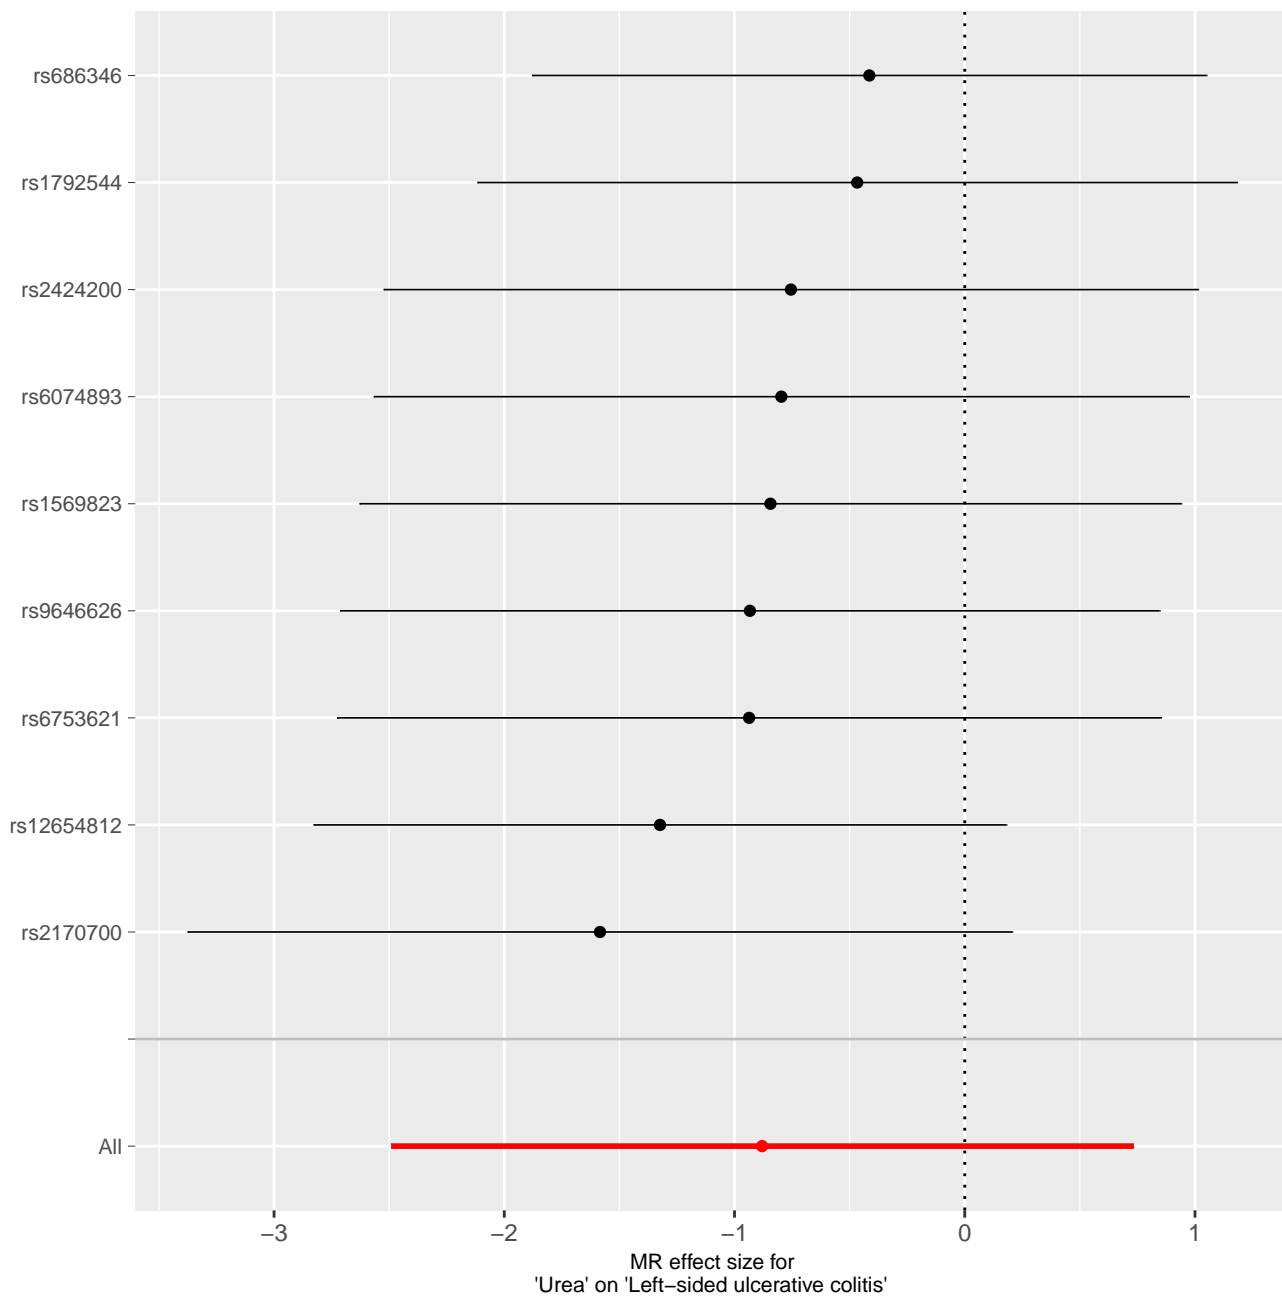

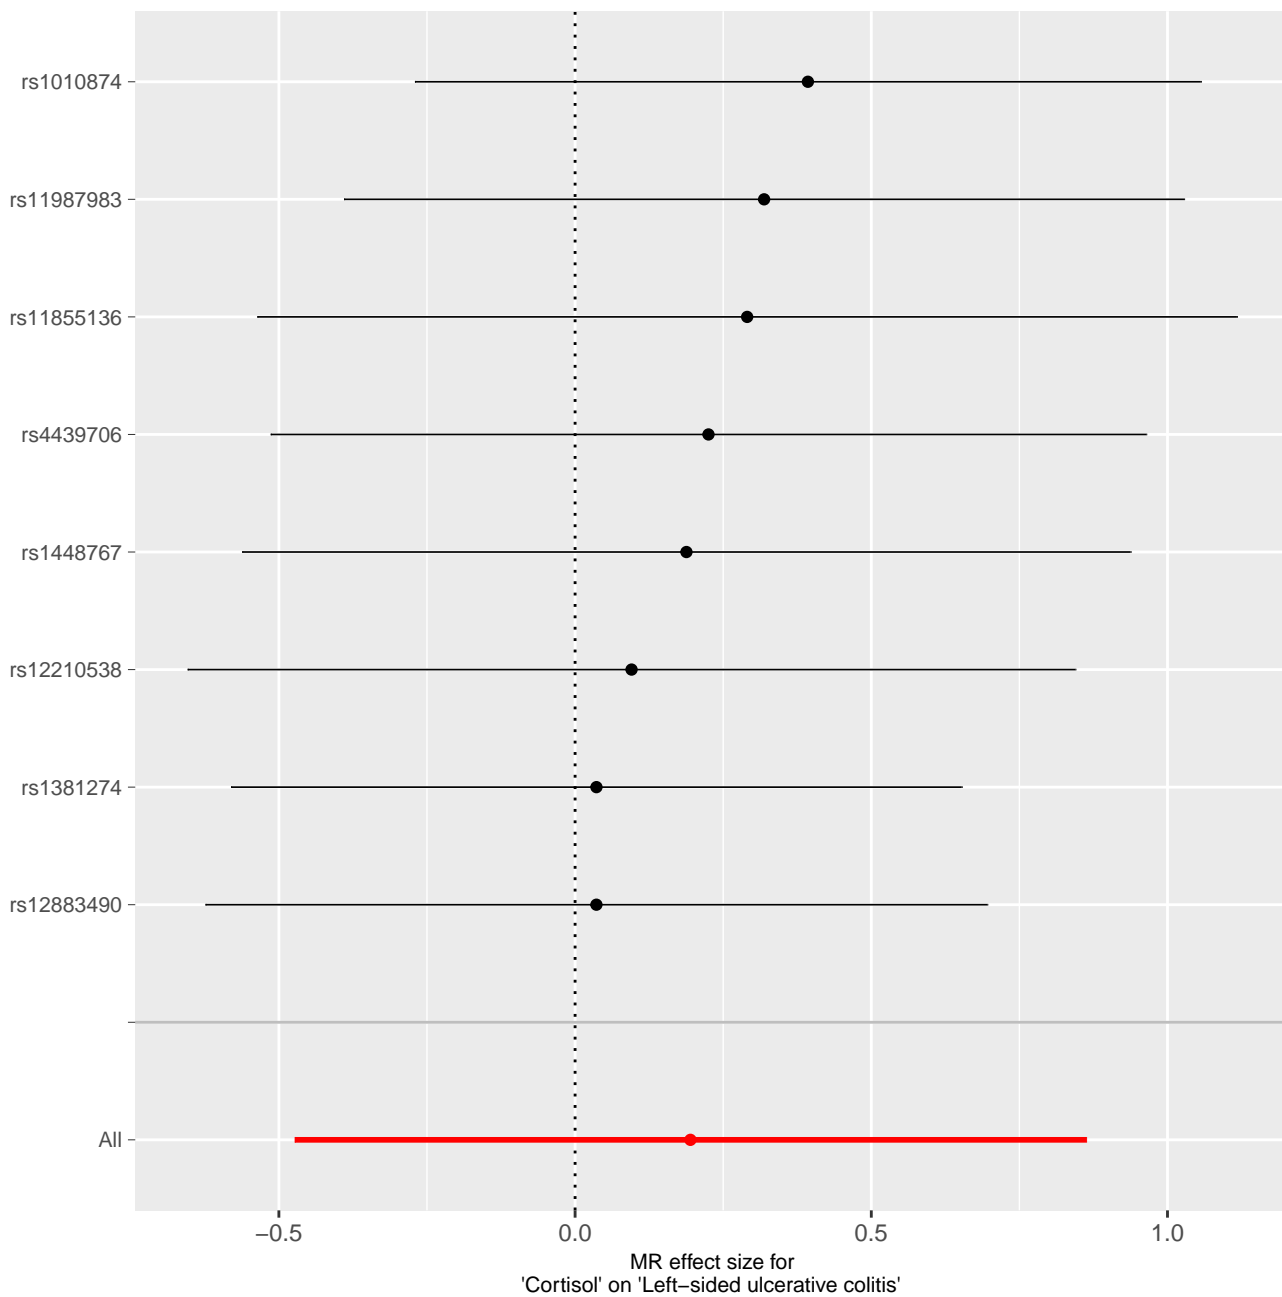

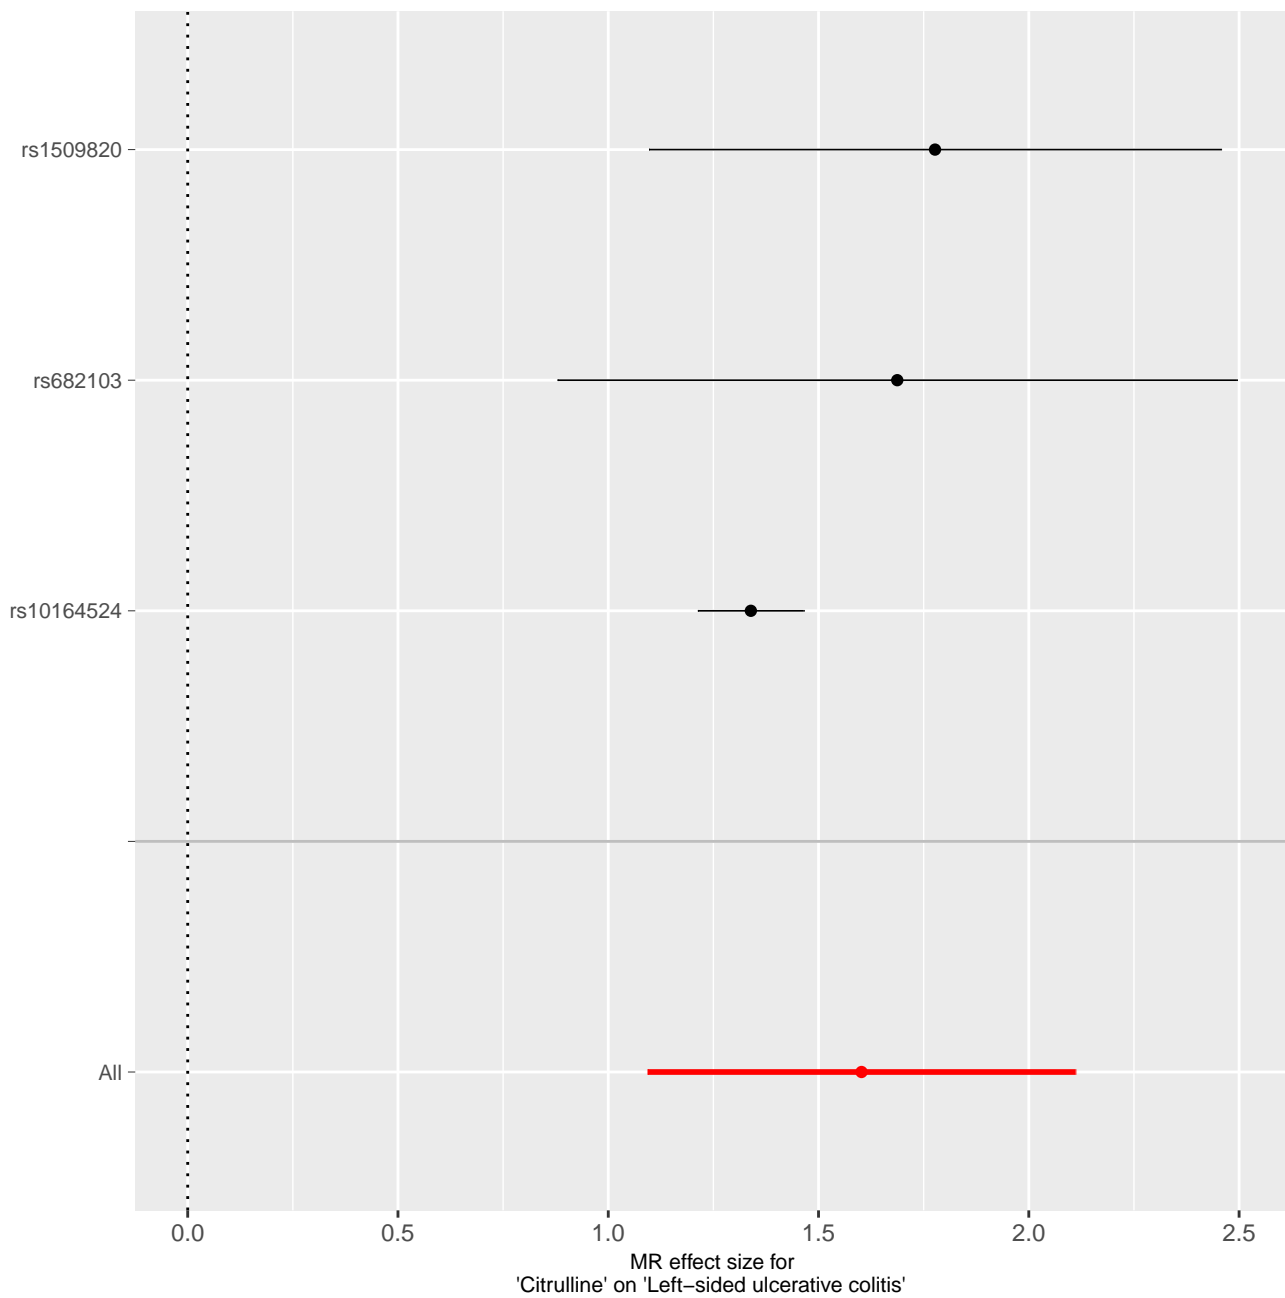



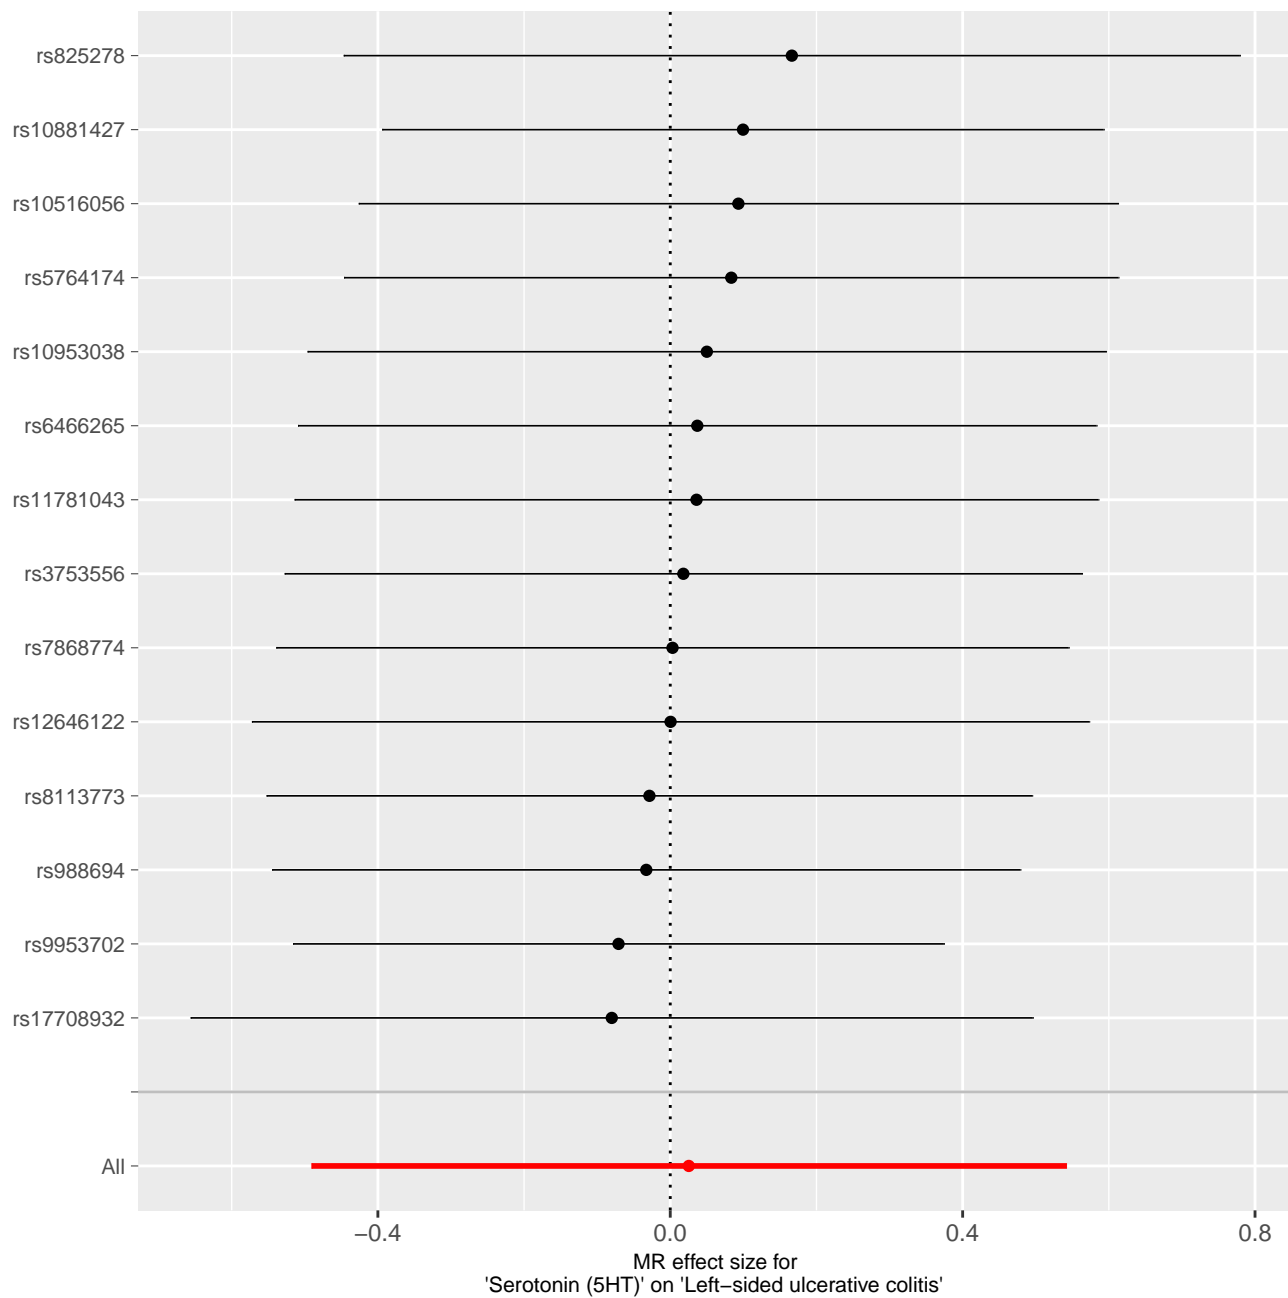

rs956966

rs875740

rs1512342

All

-1

0

1

MR effect size for

'Gamma-glutamyltyrosine' on 'Left-sided ulcerative colitis'

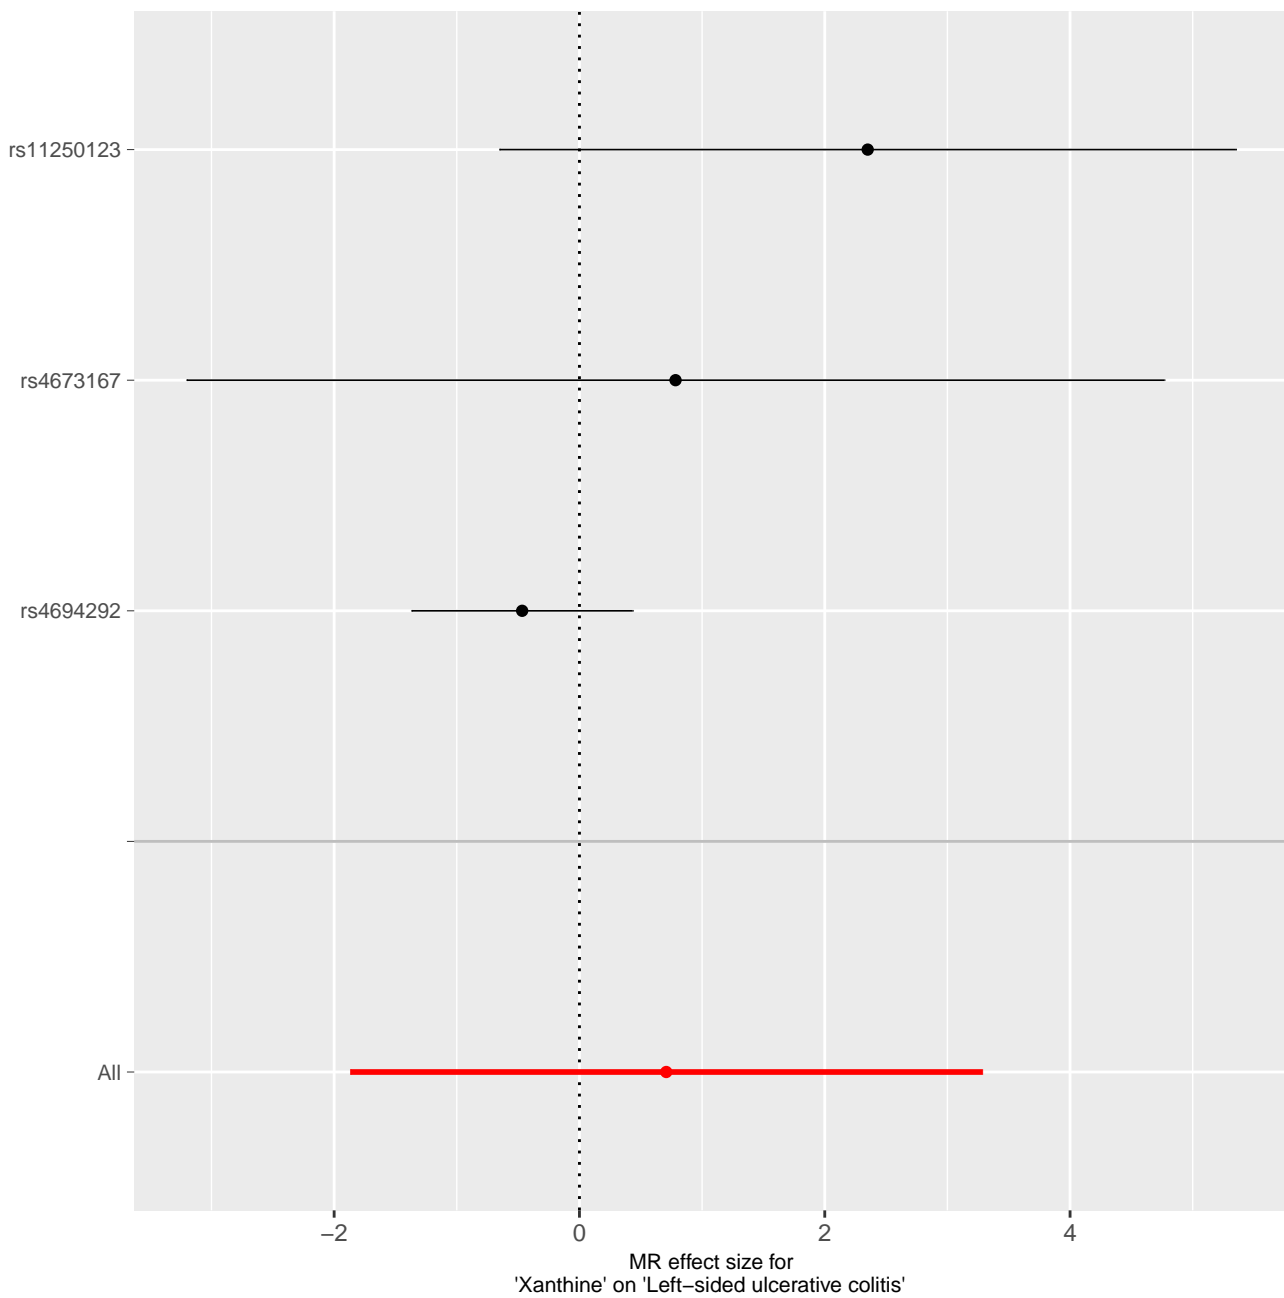

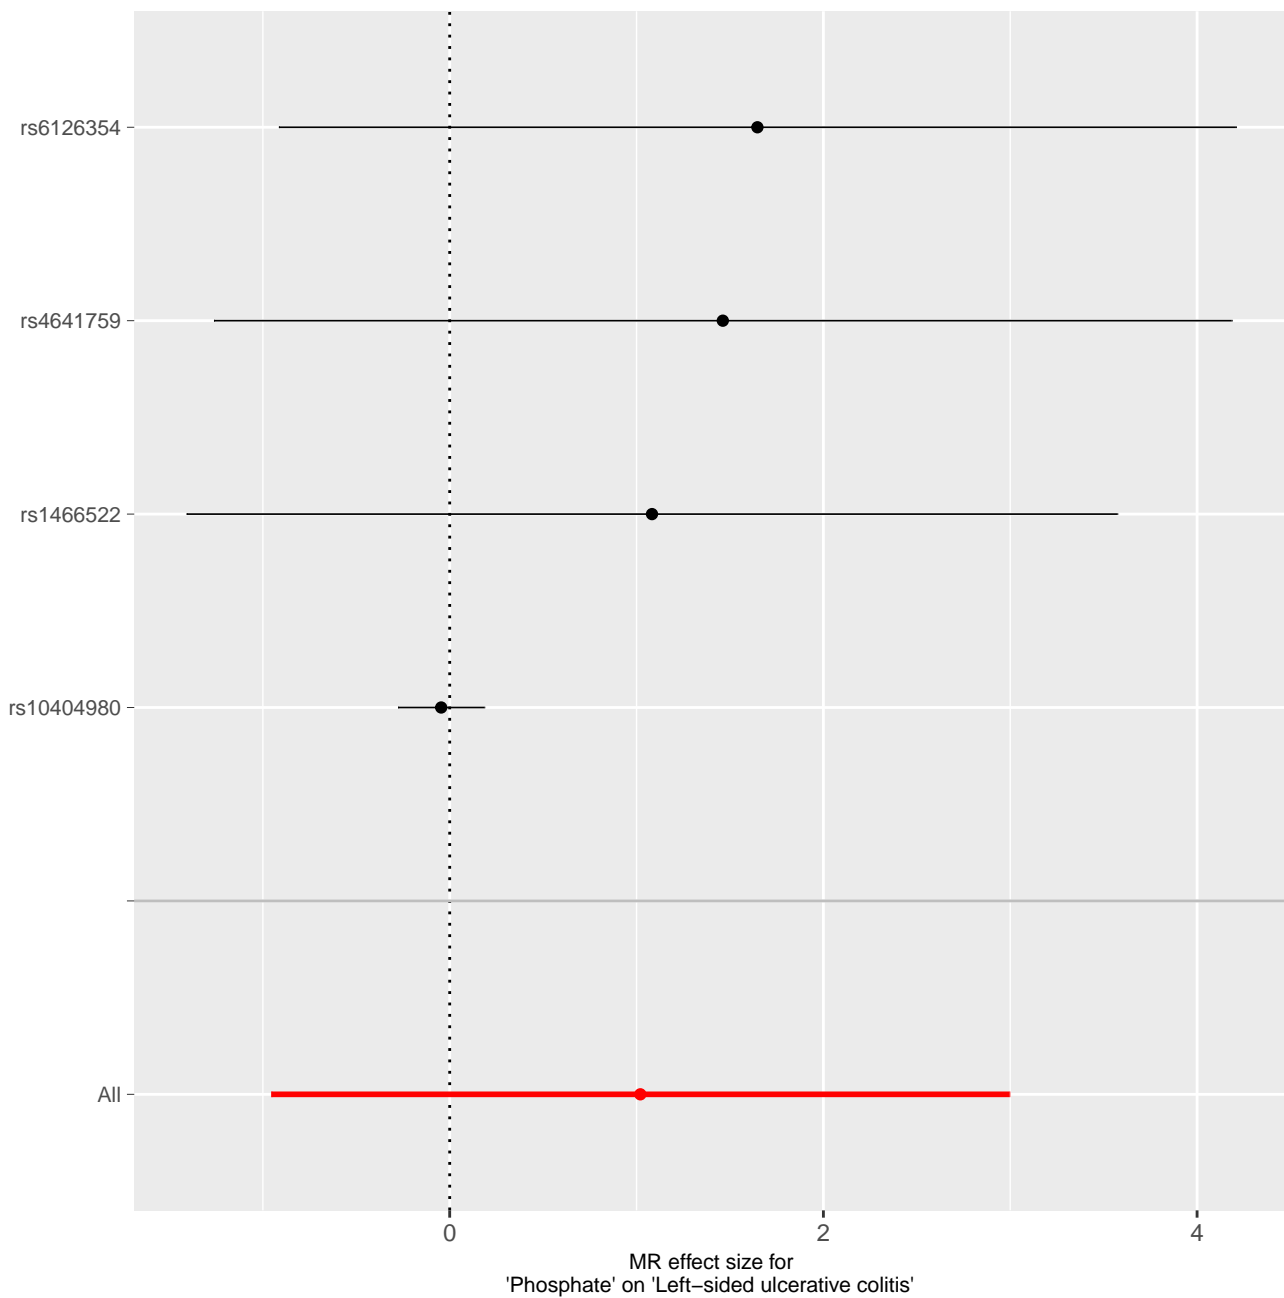

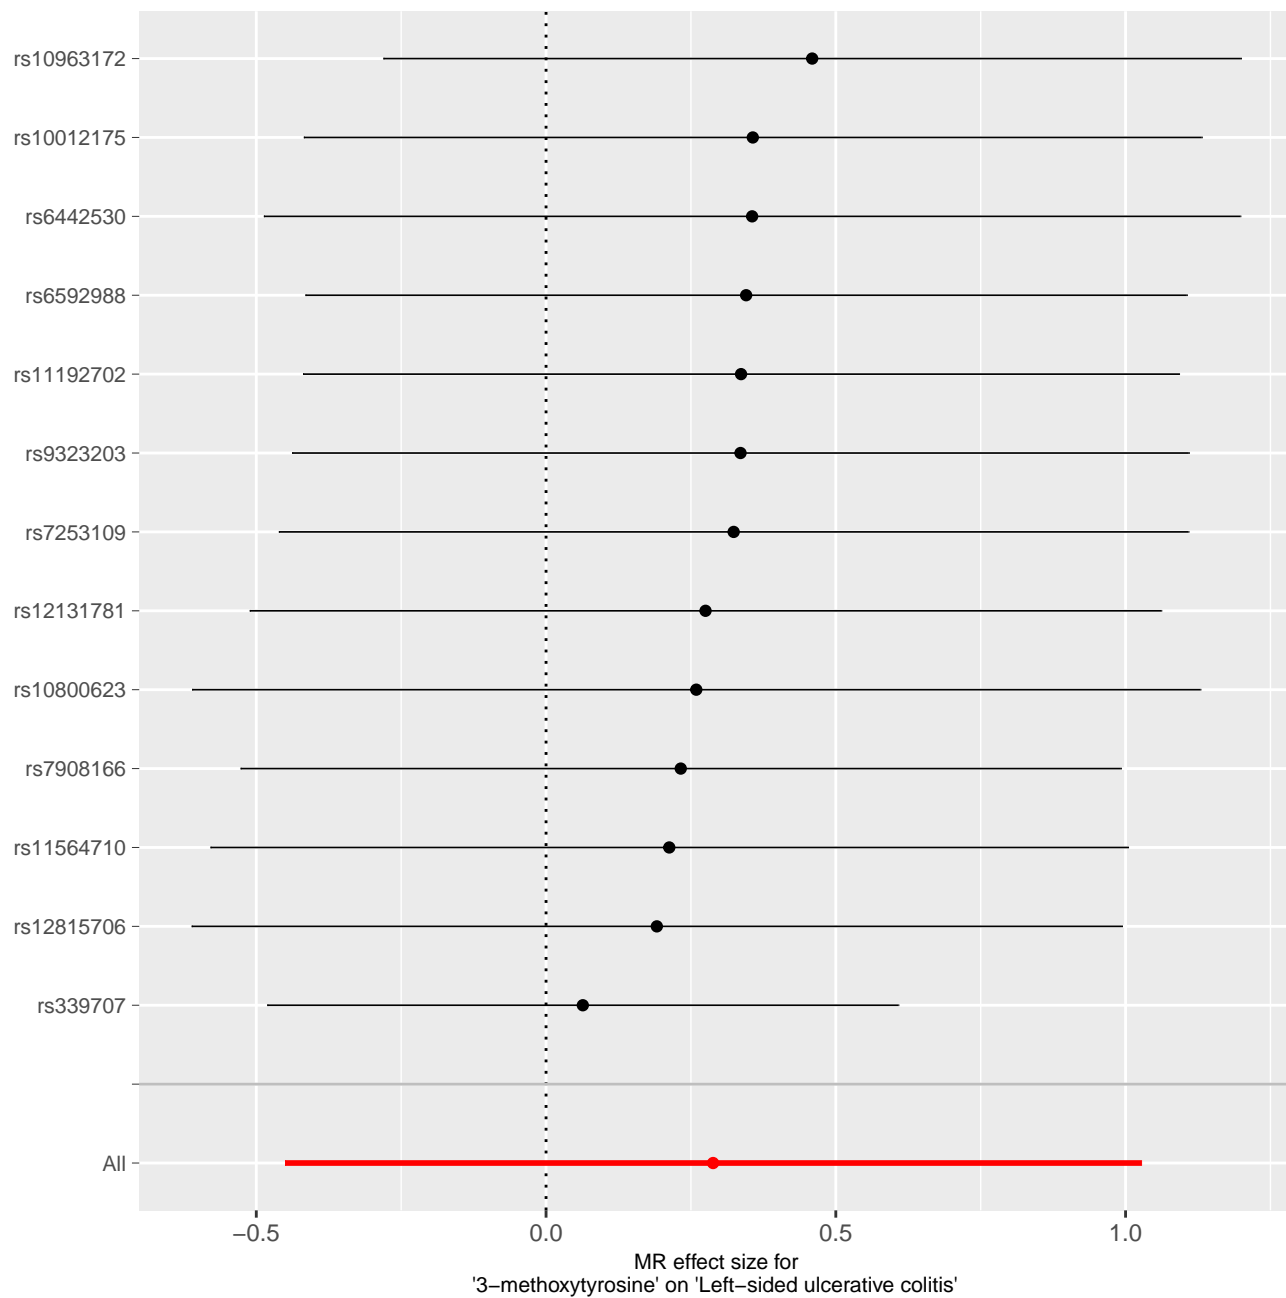

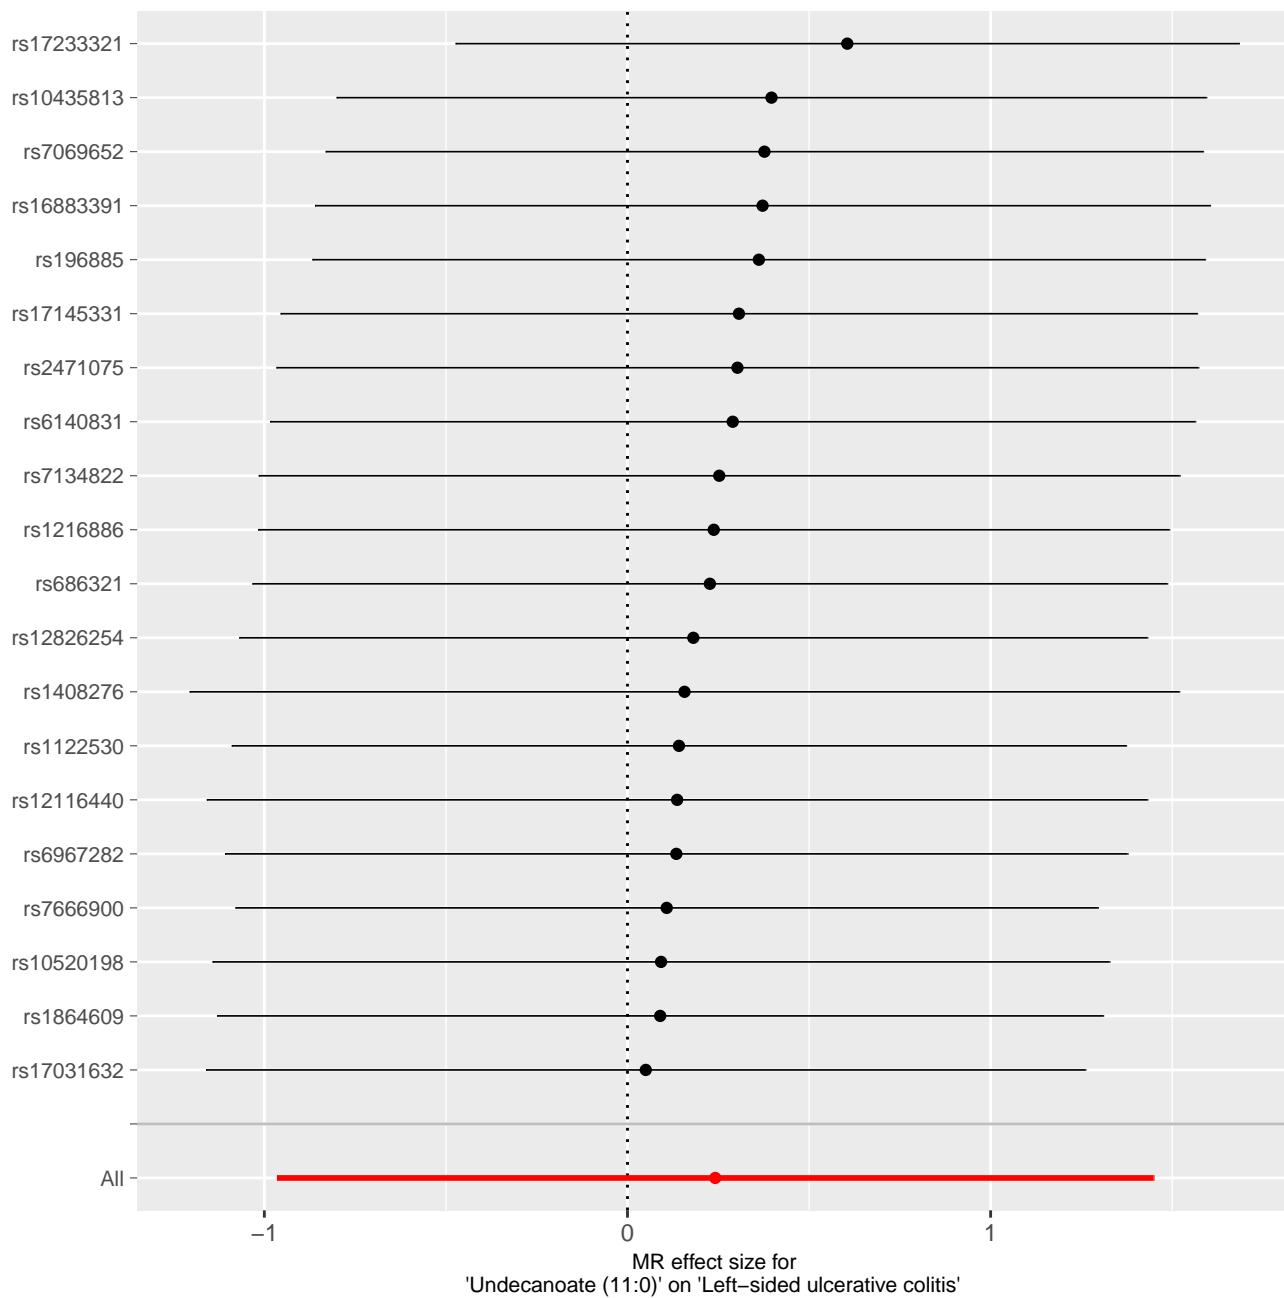

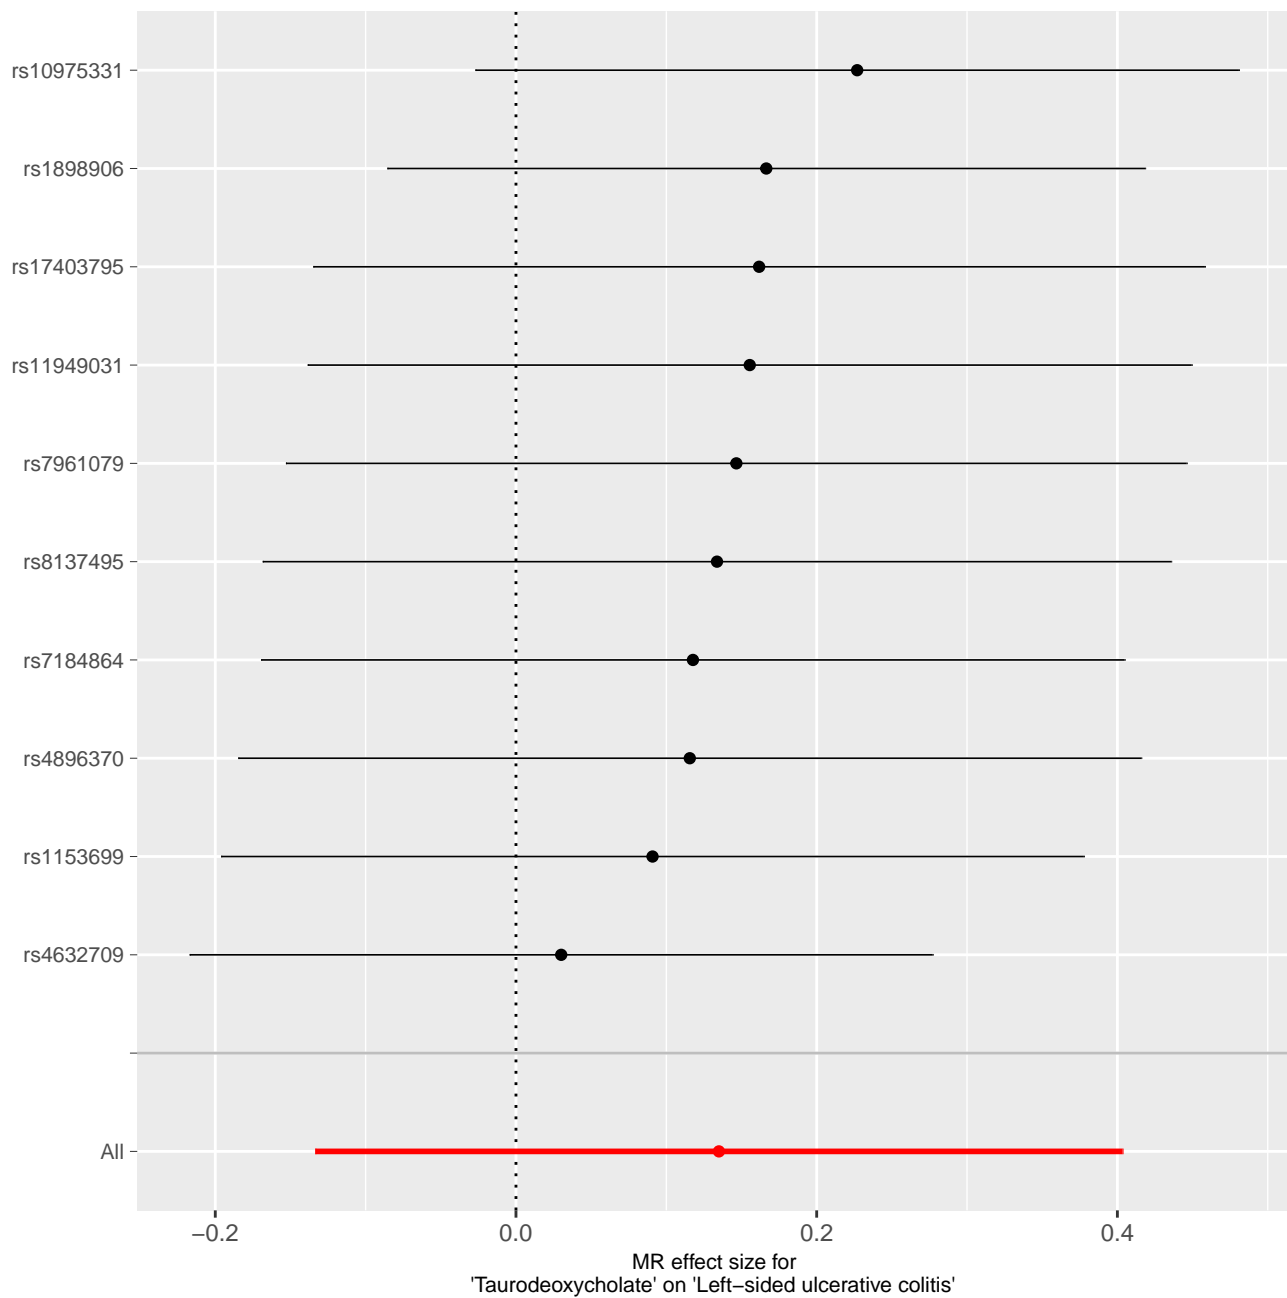

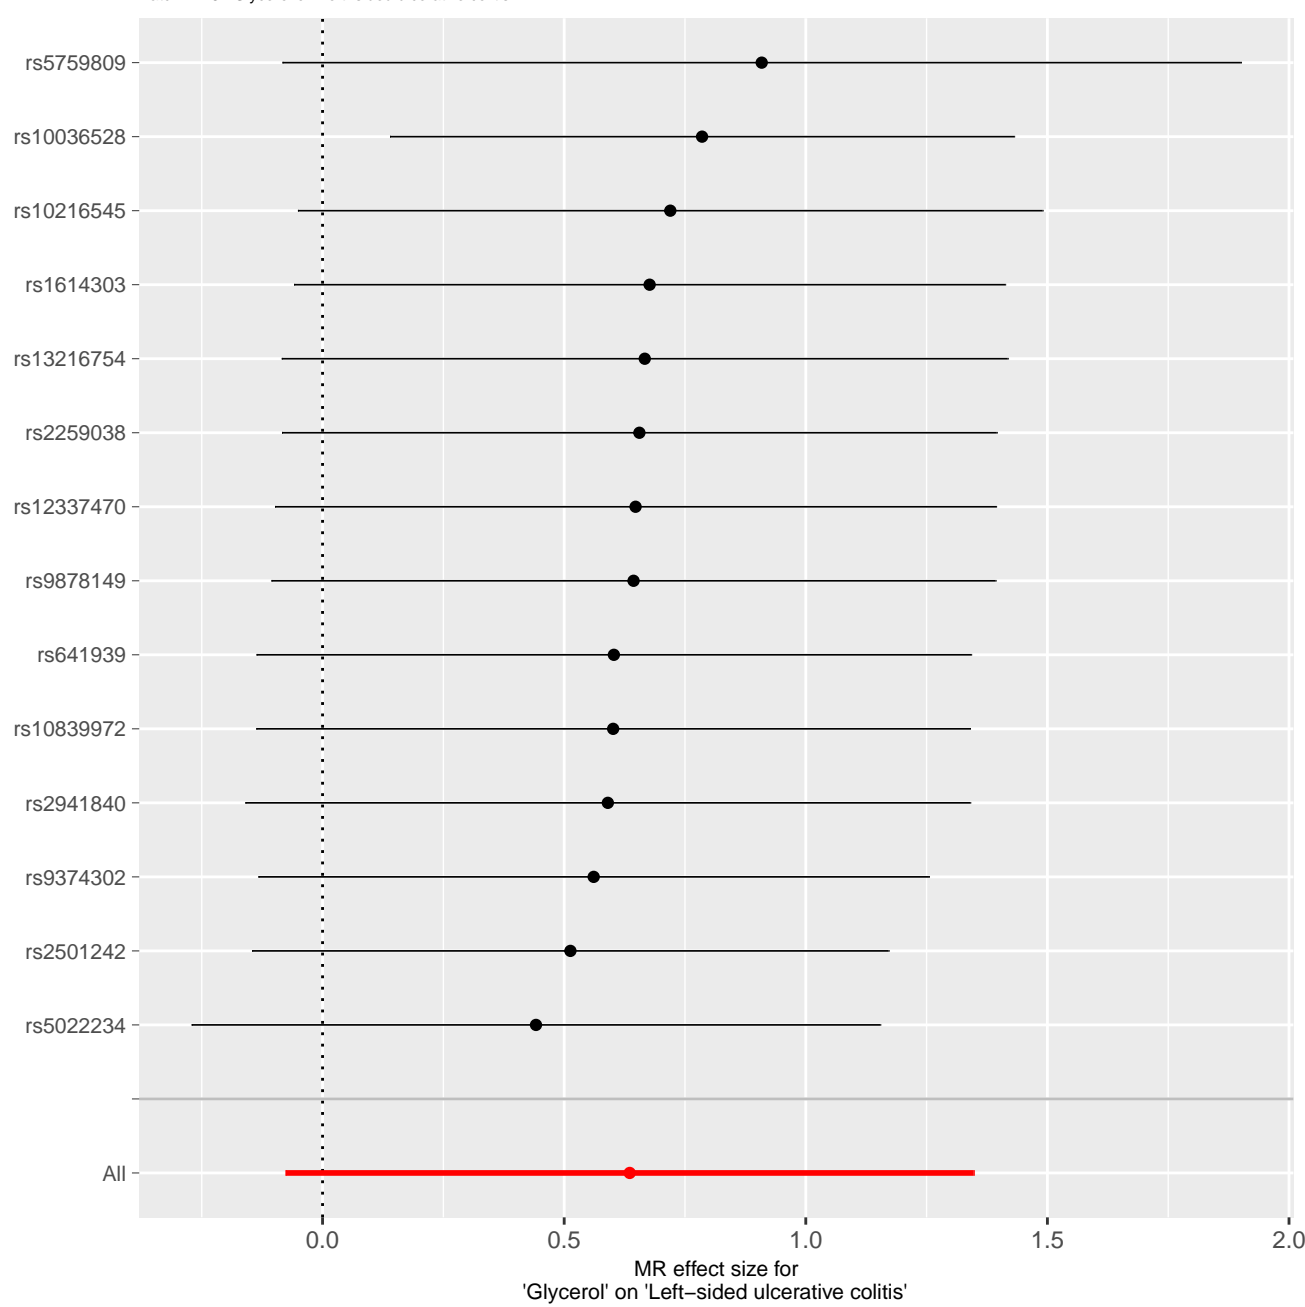



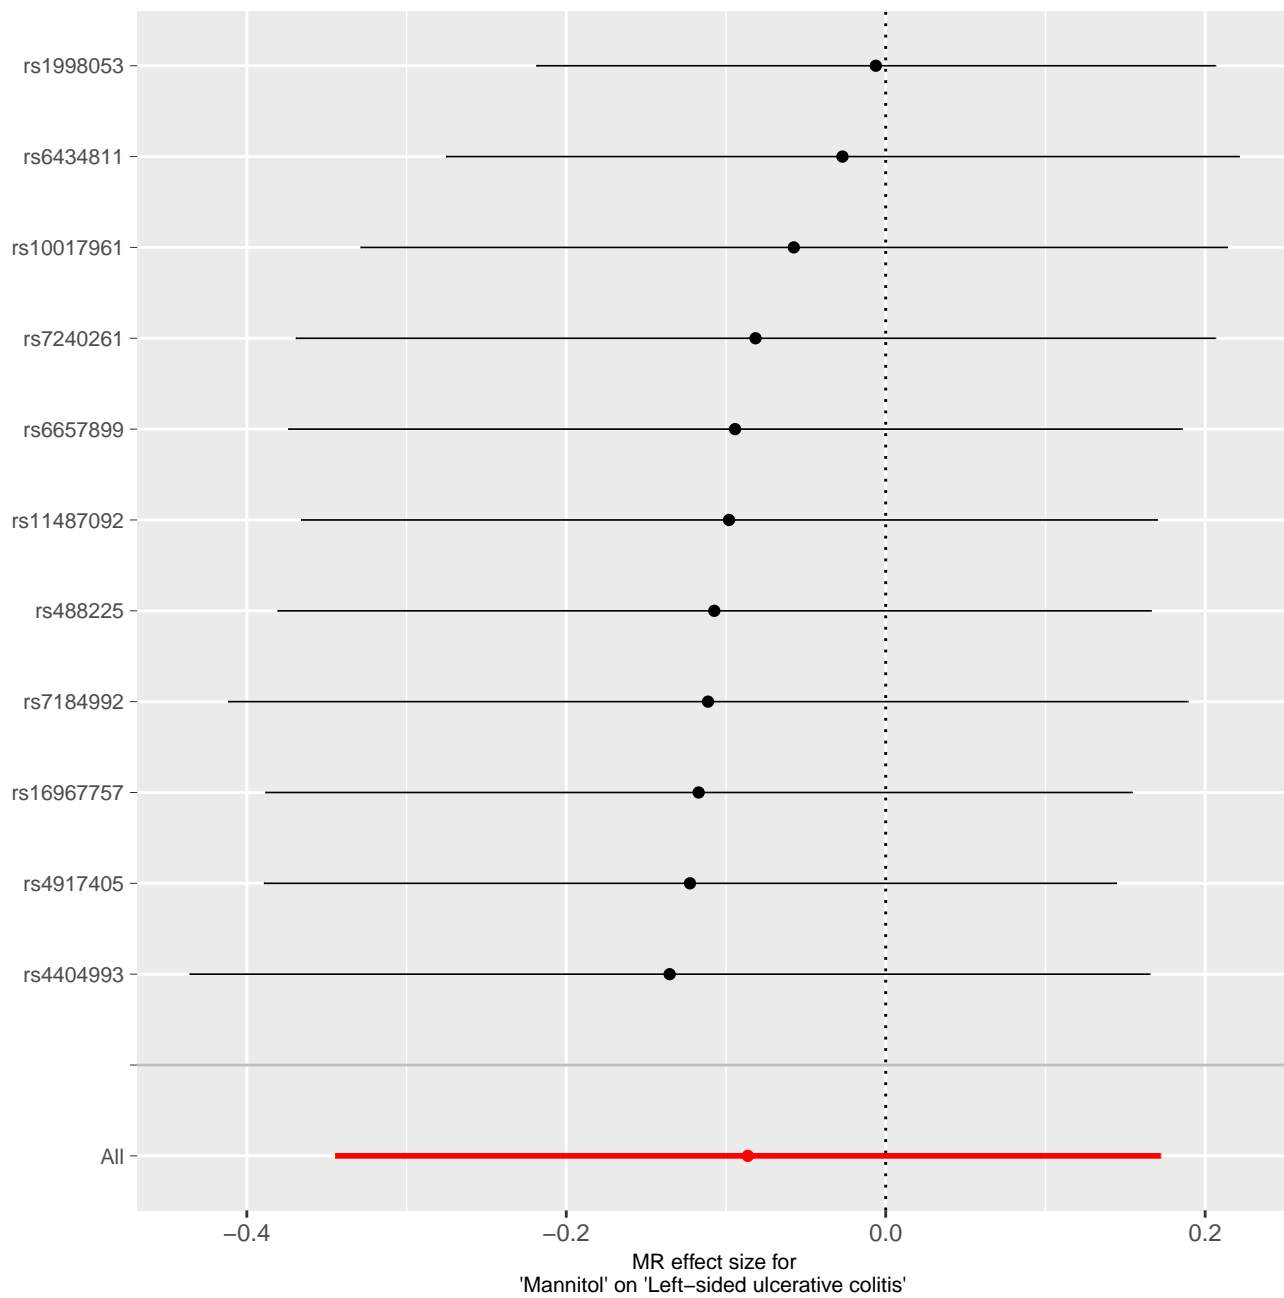

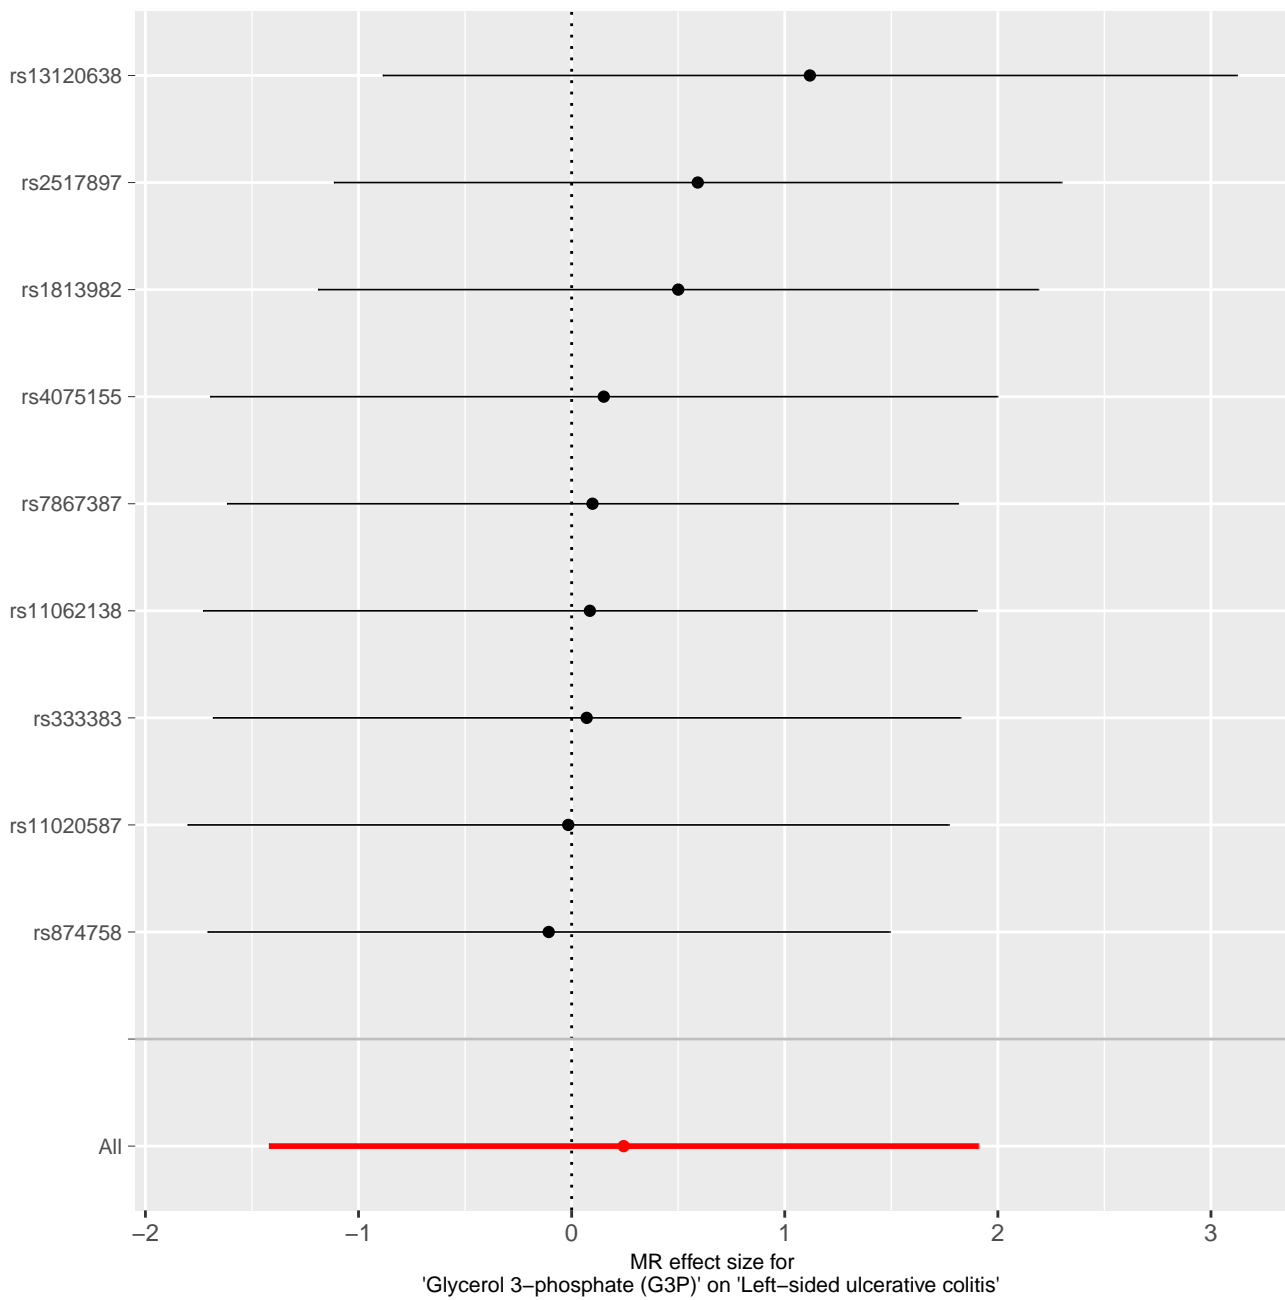

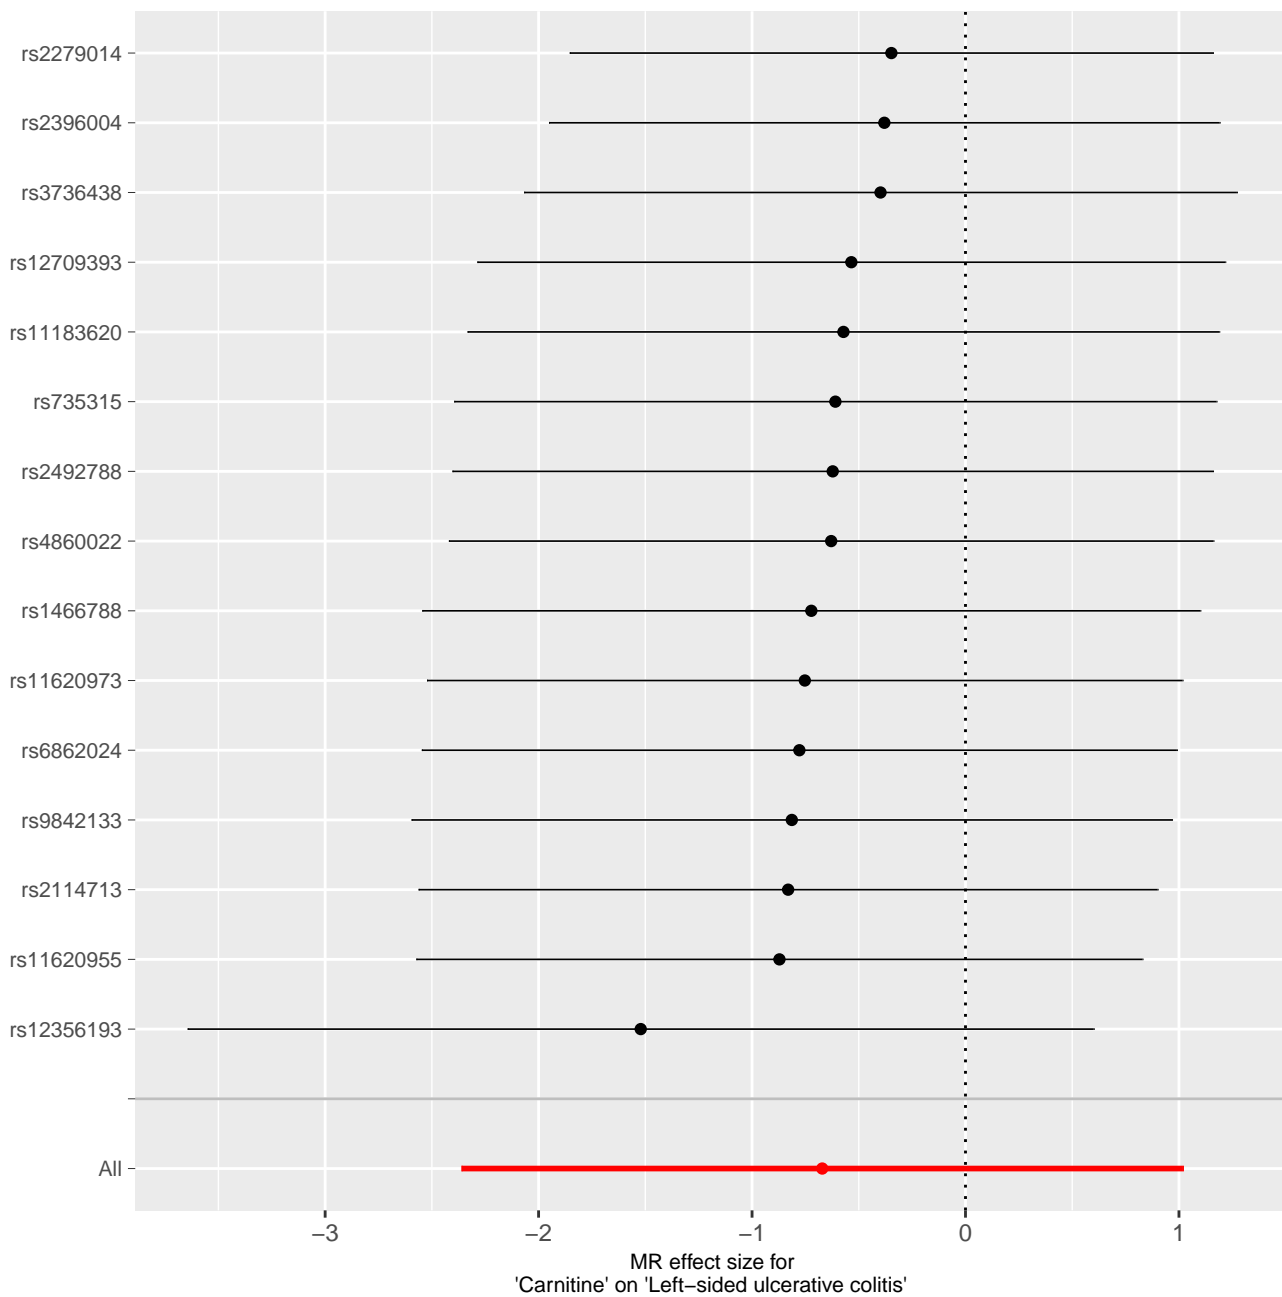

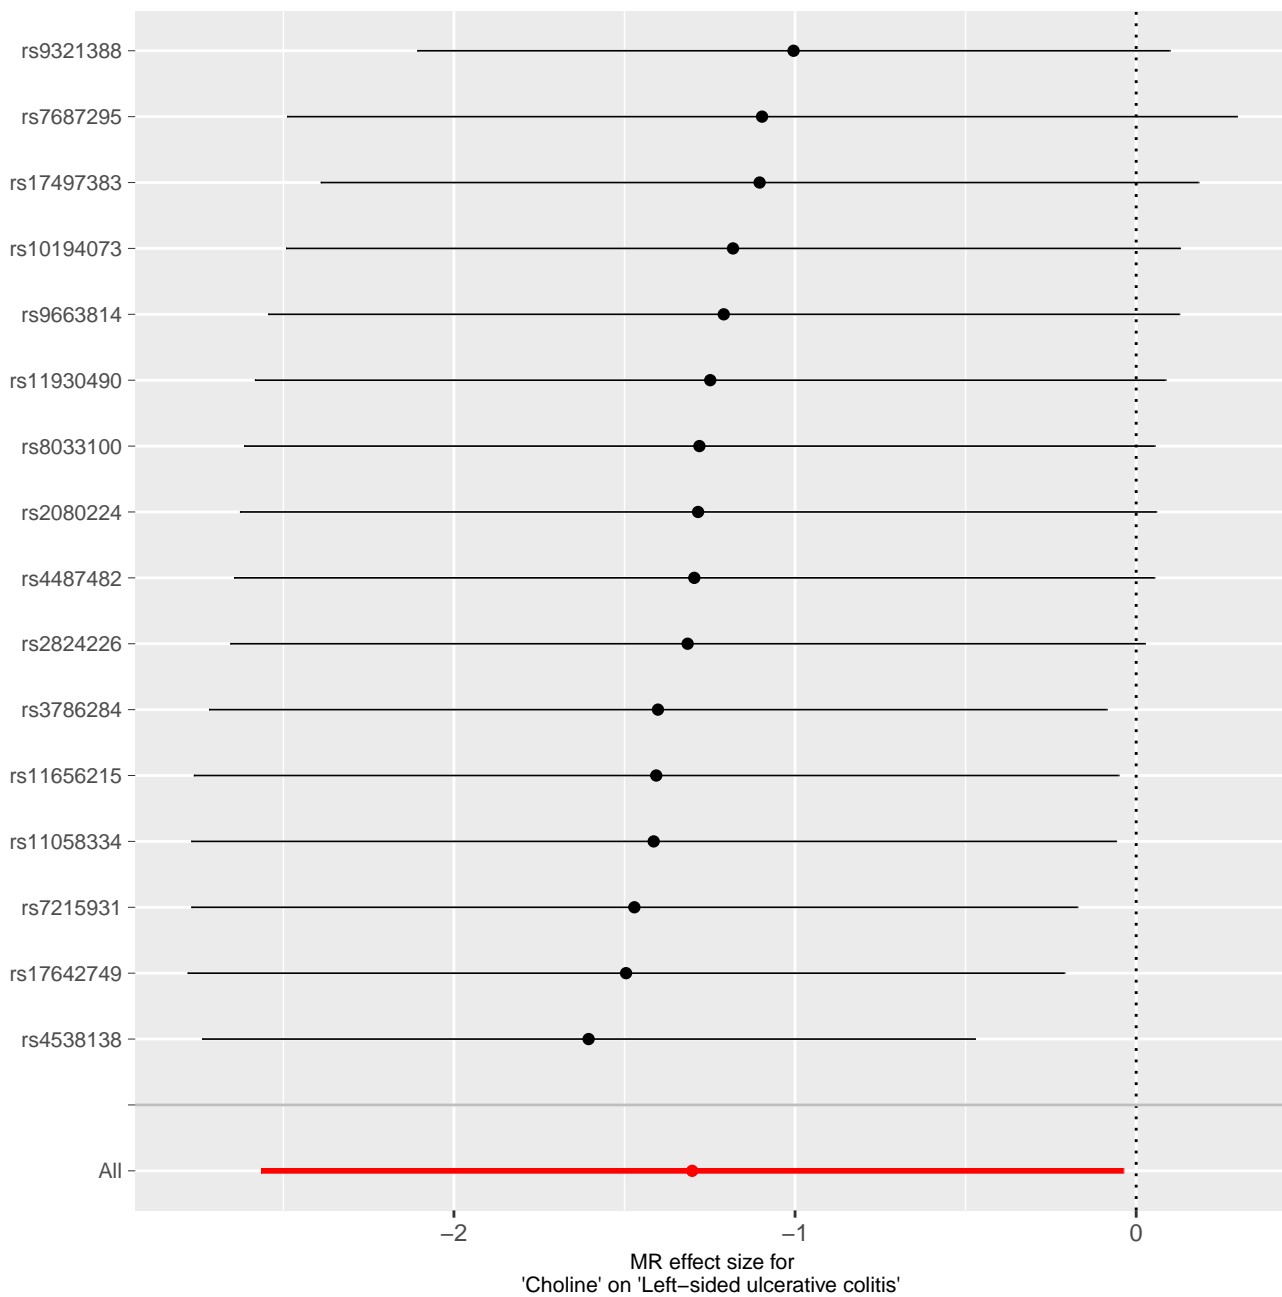

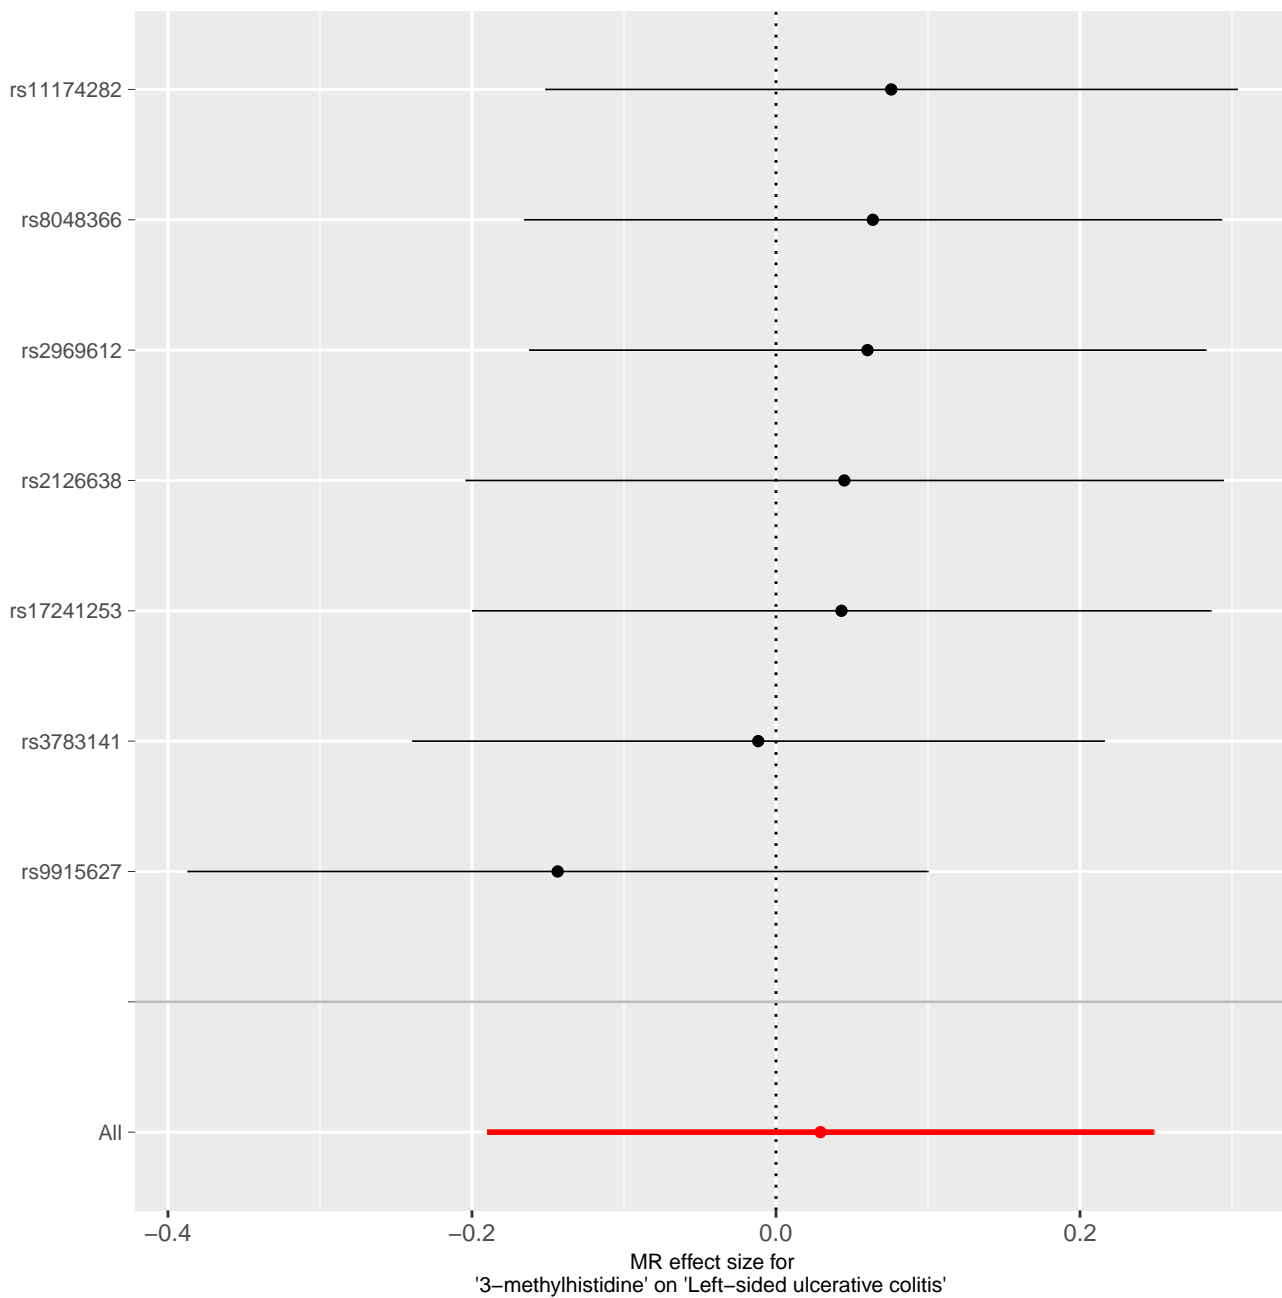

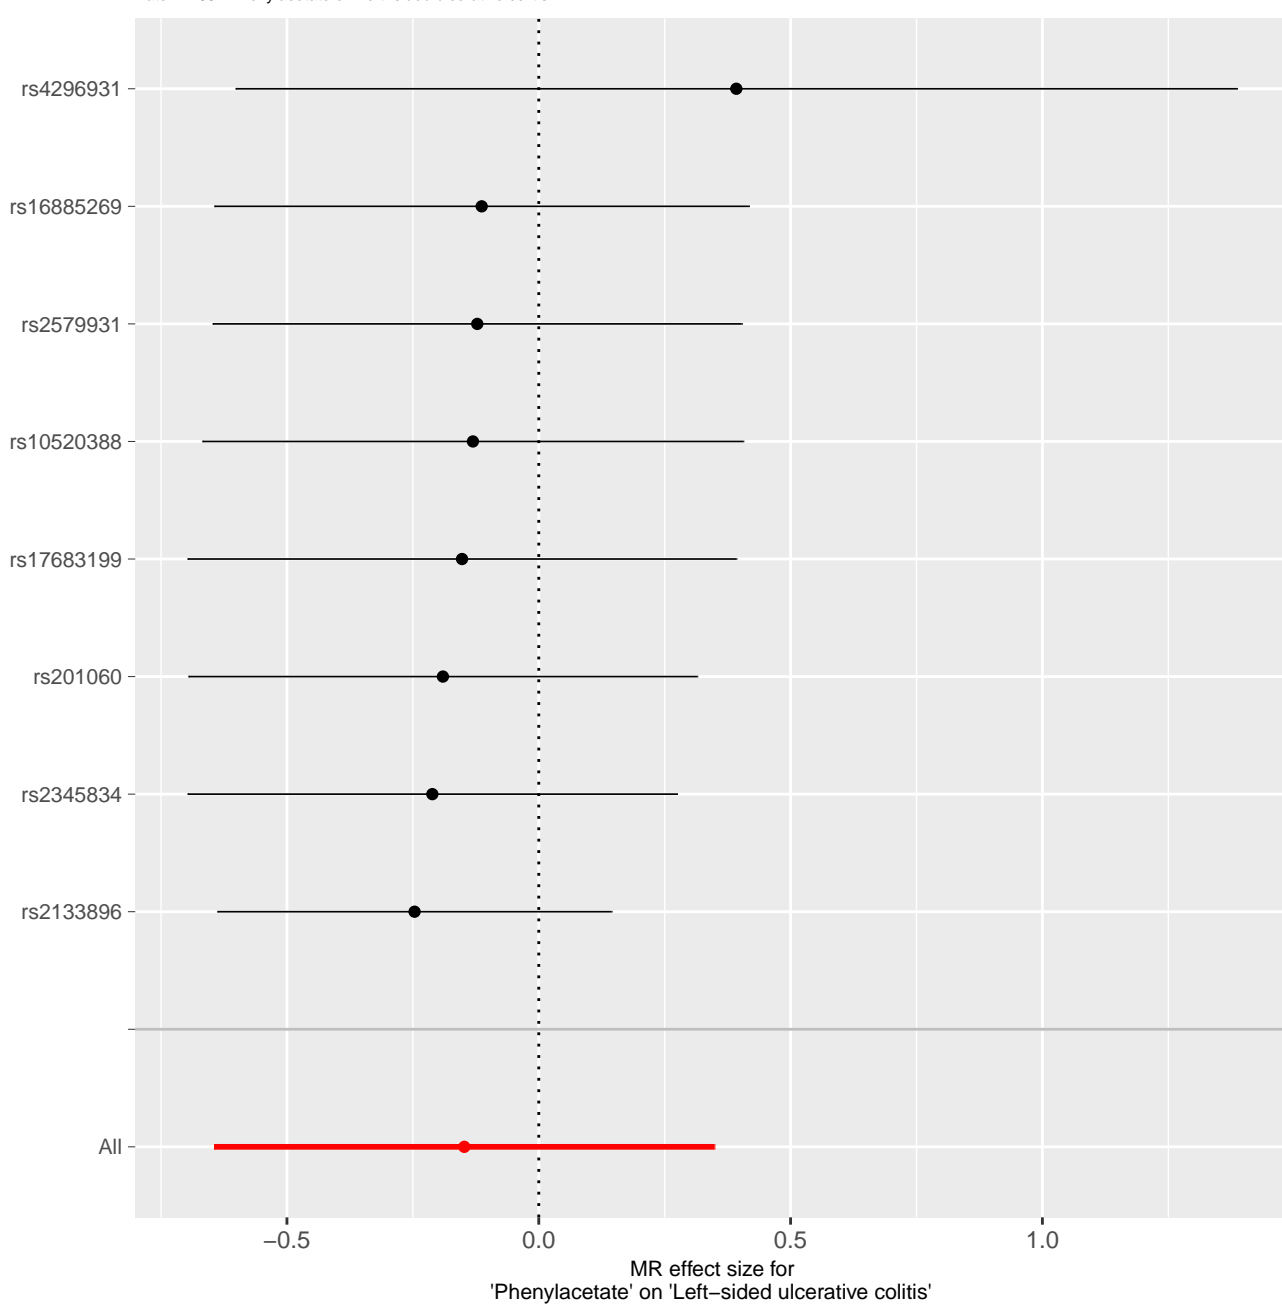

Batch 1456 : Glycerophosphorylcholine (GPC) on Left-sided ulcerative colitis

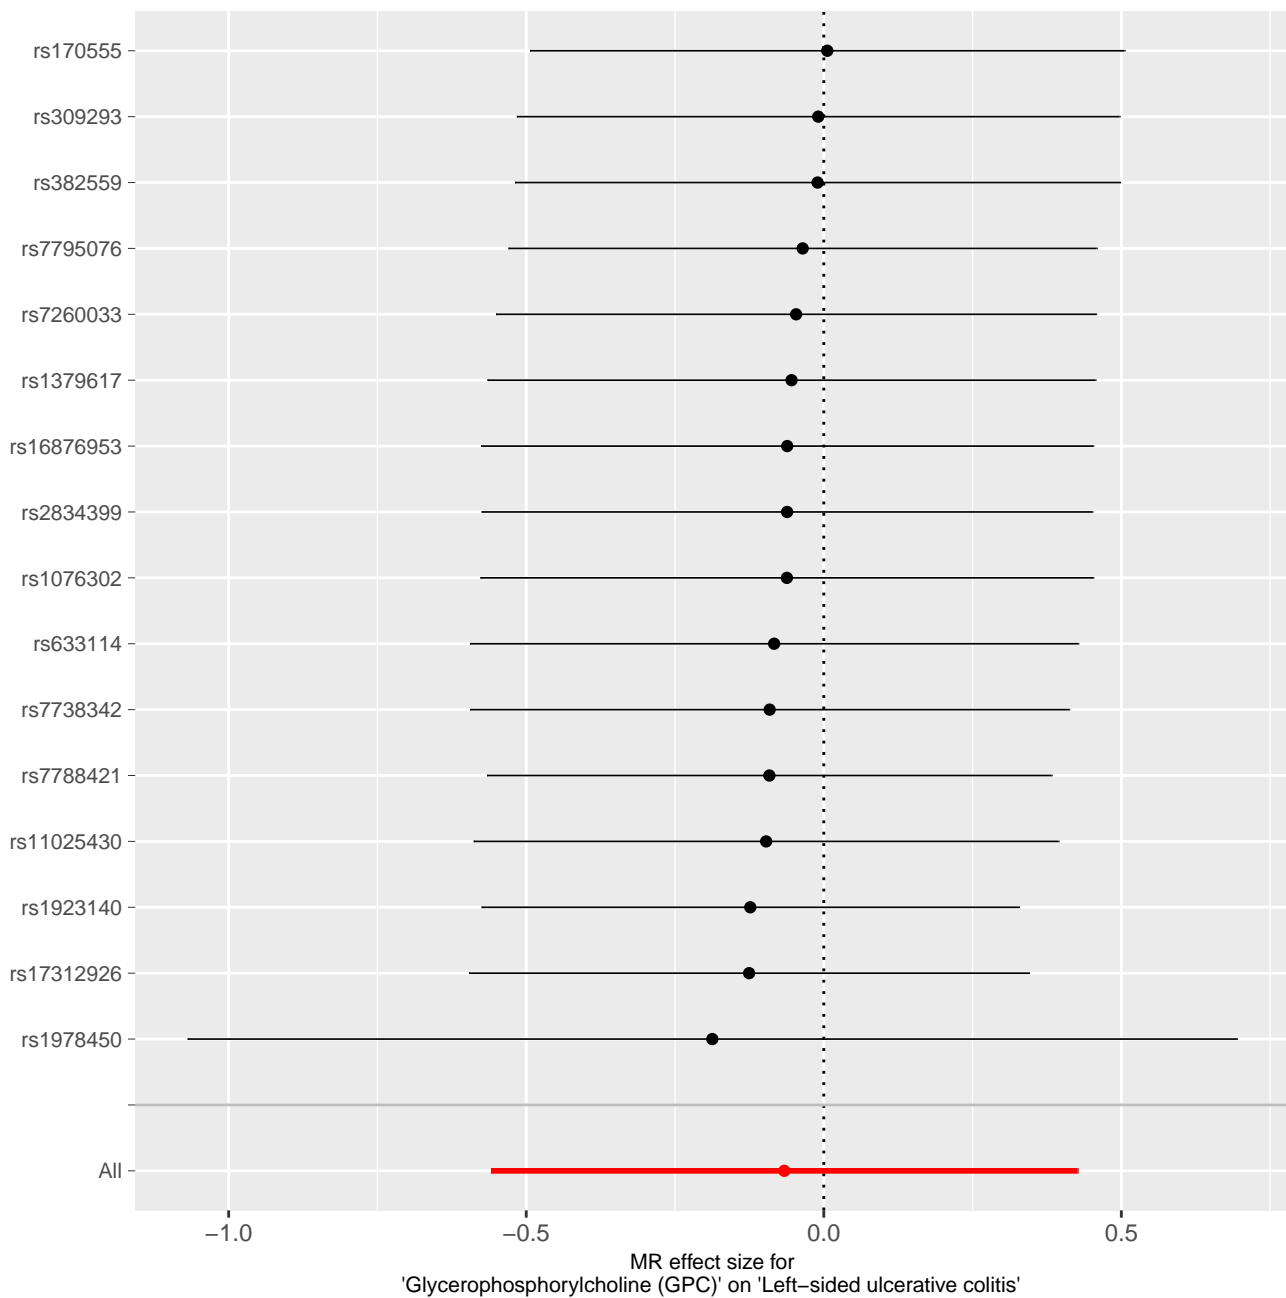

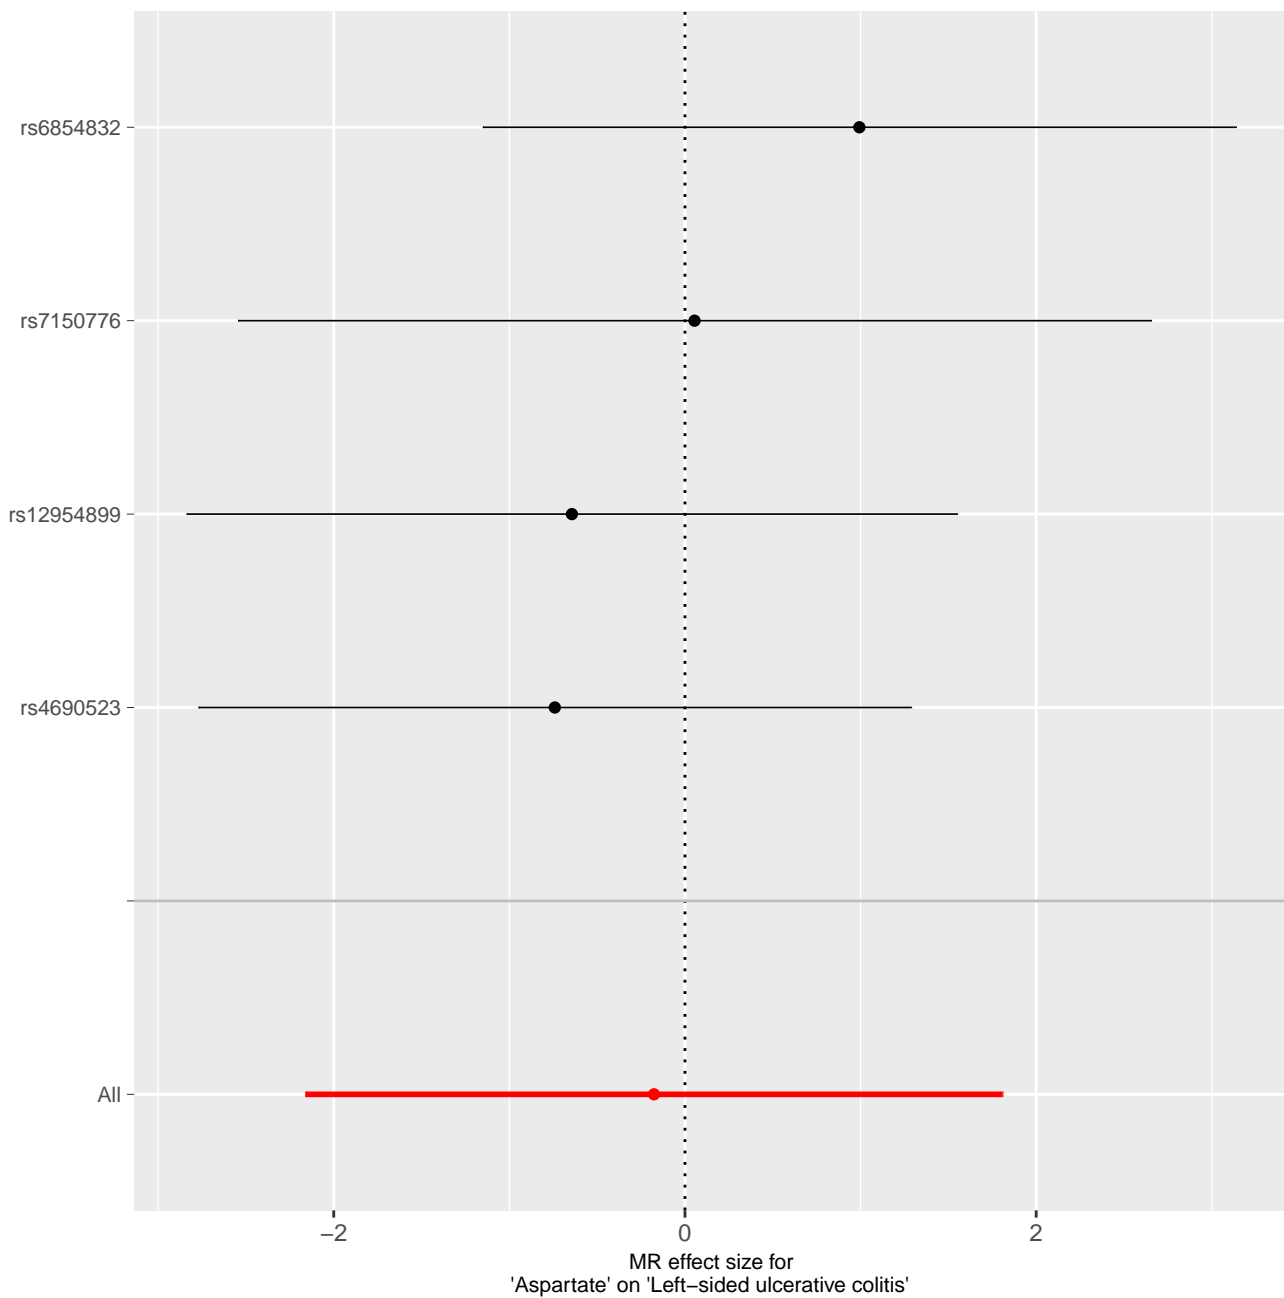



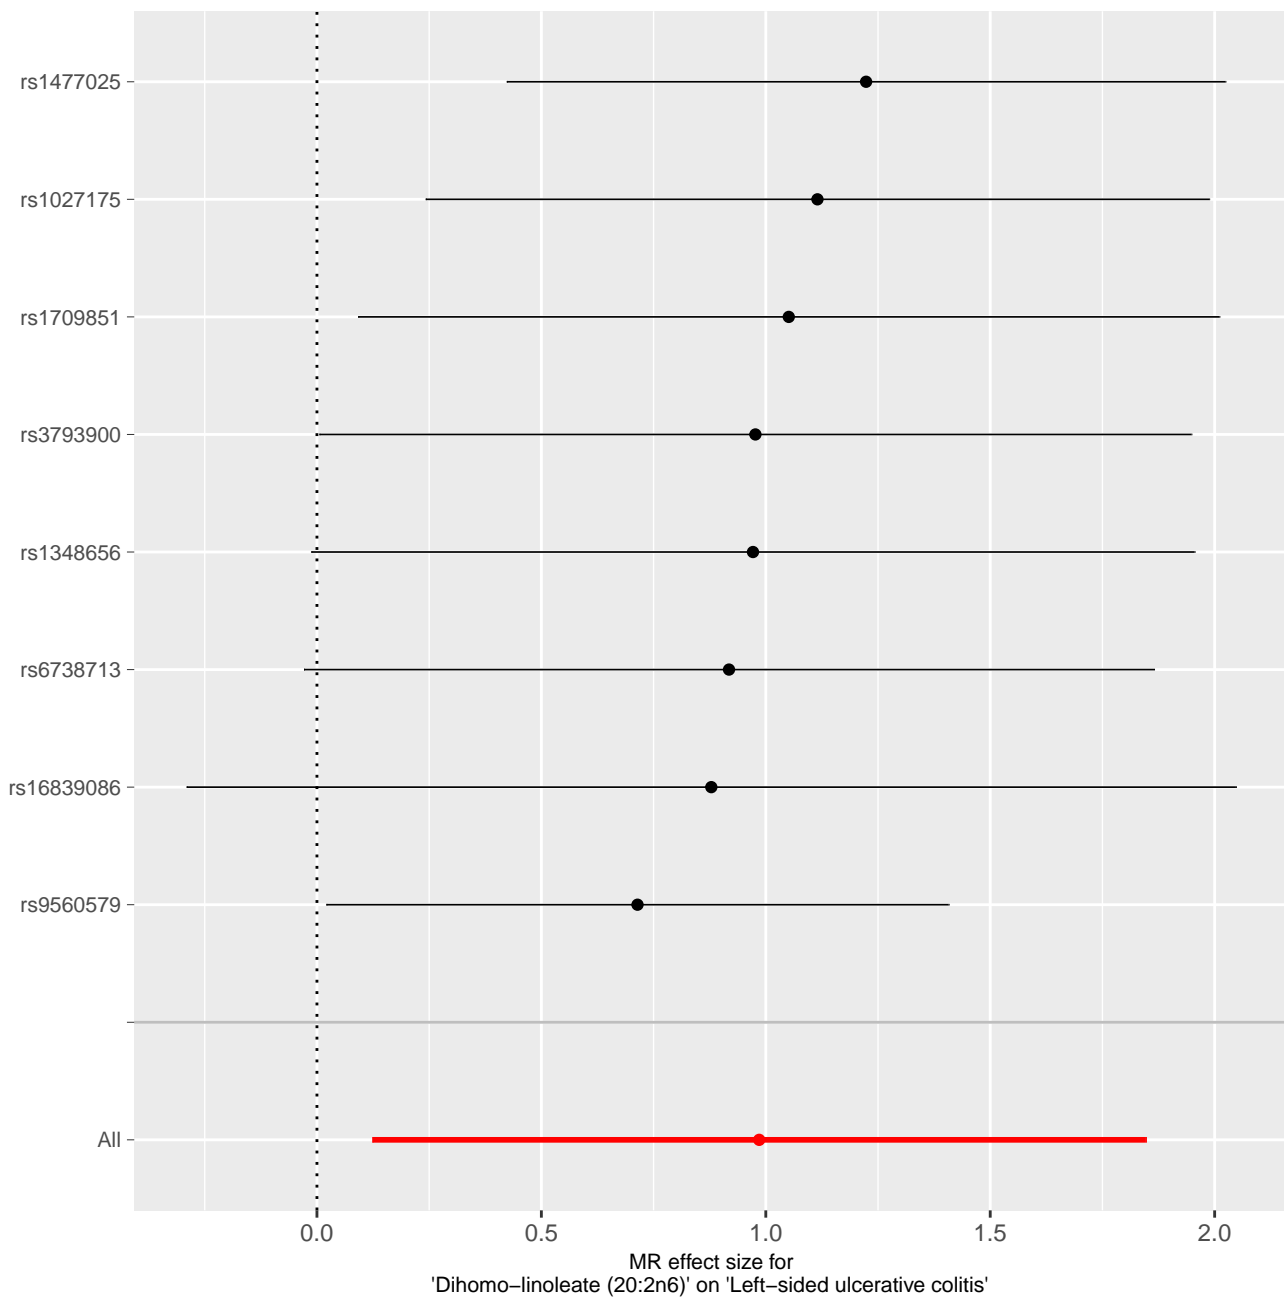

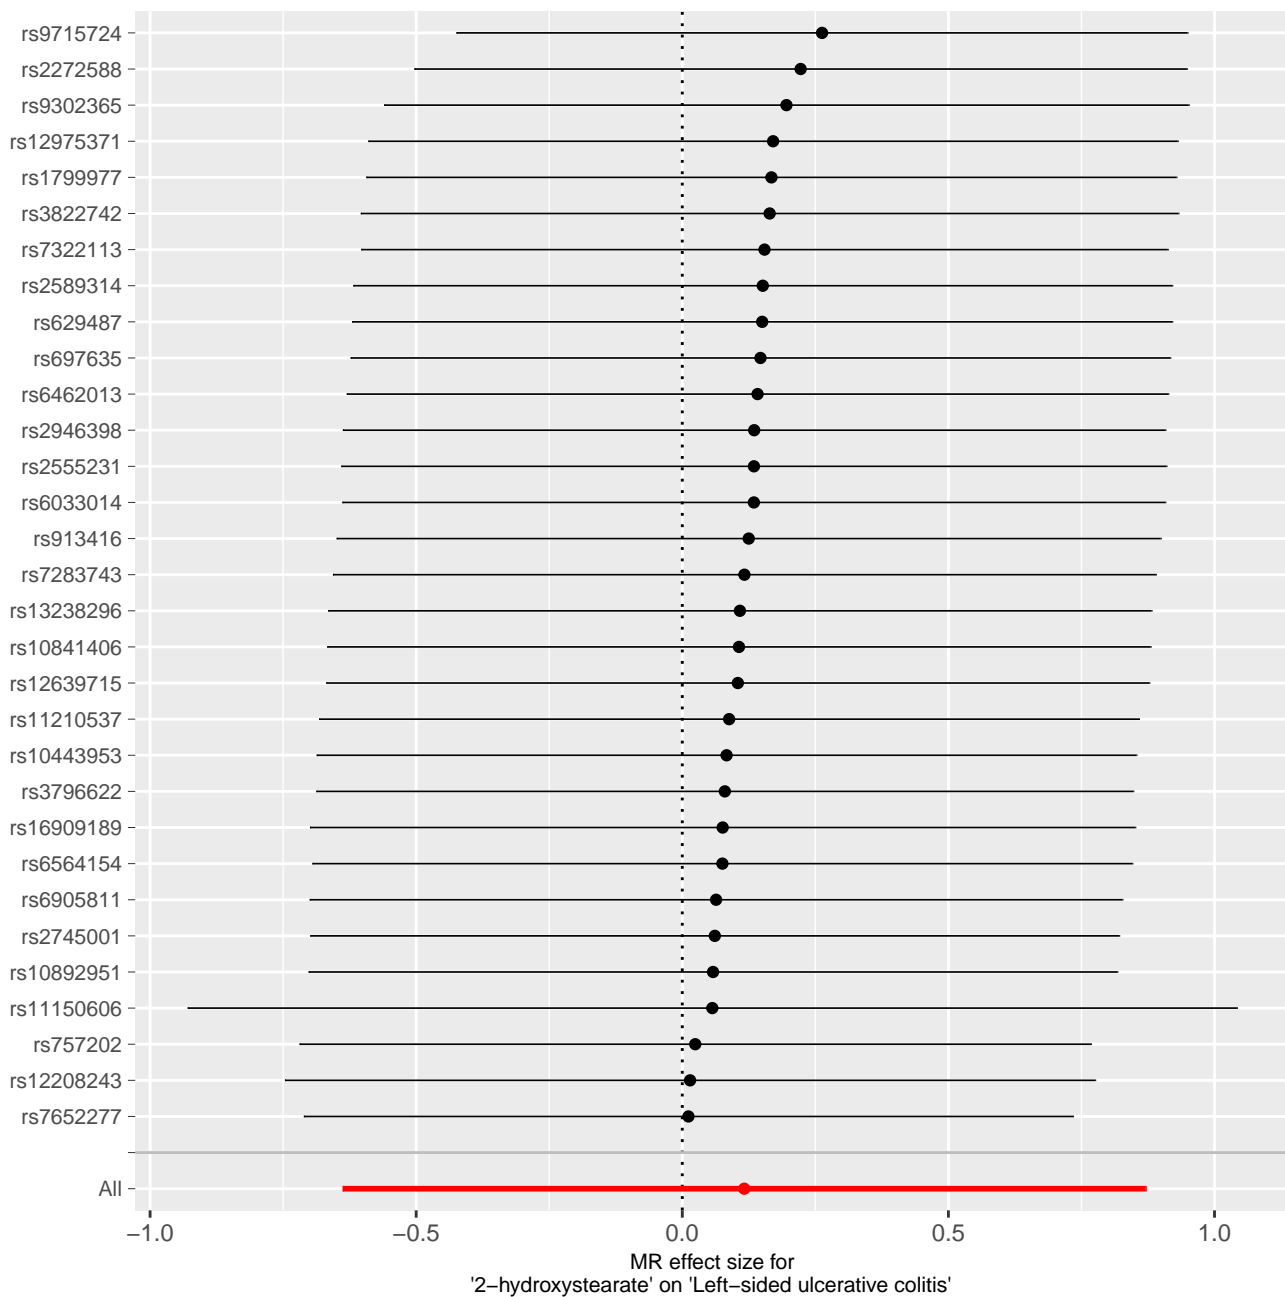

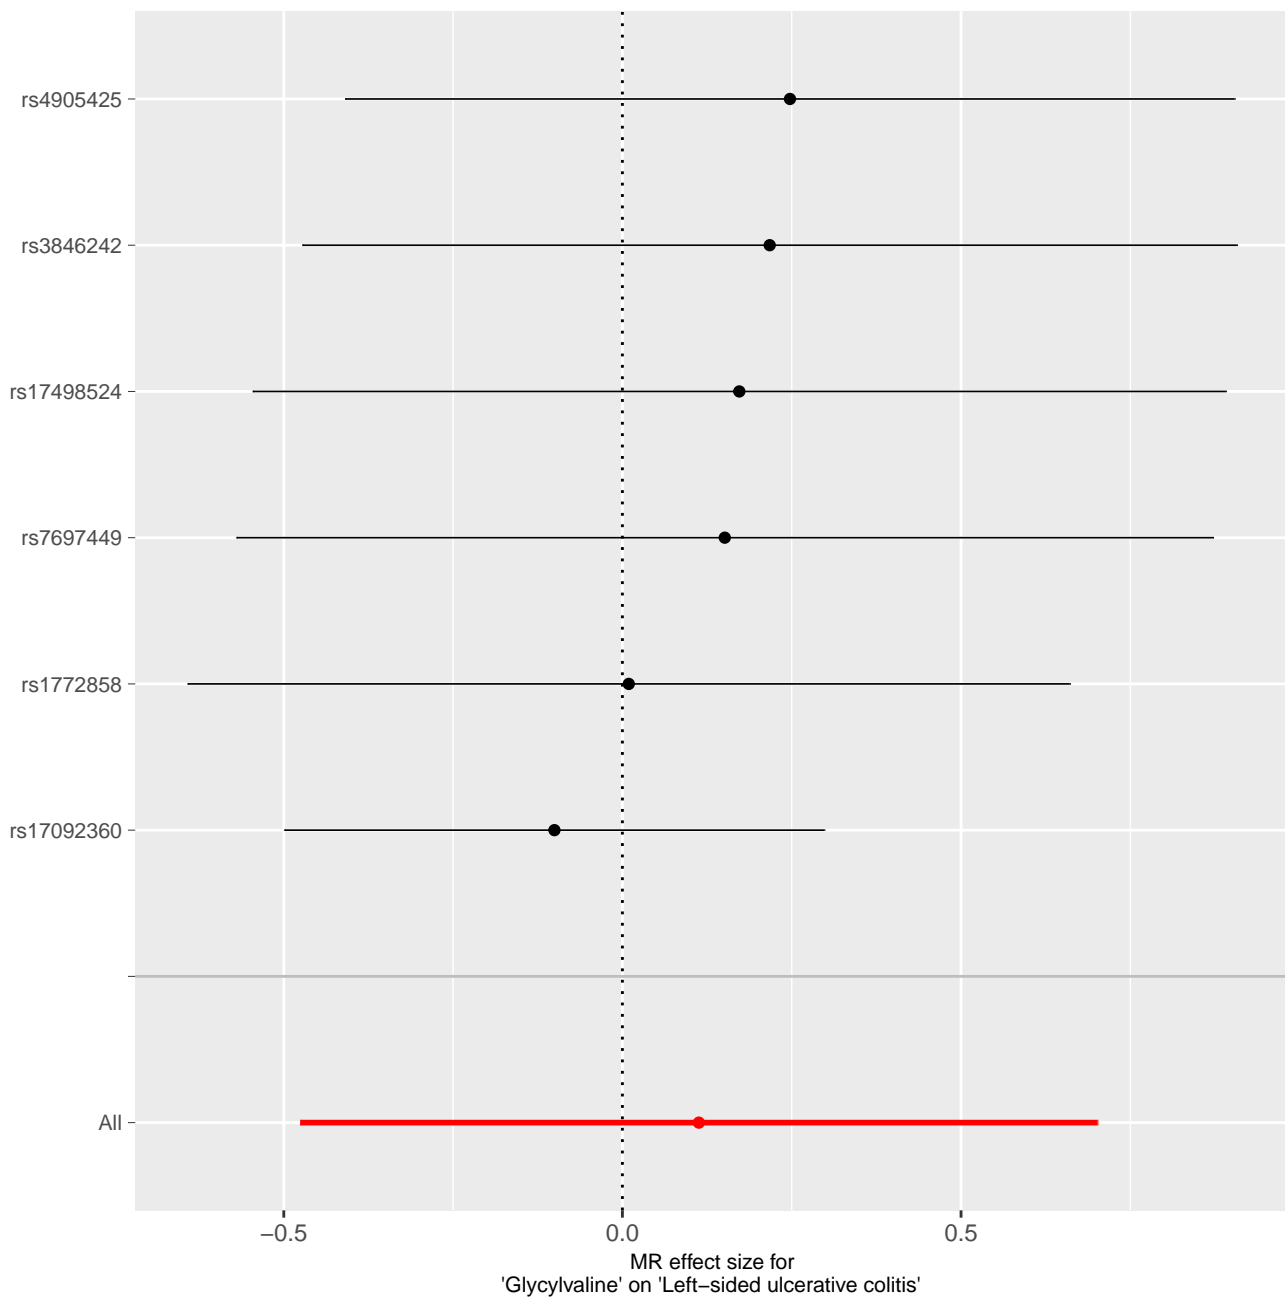

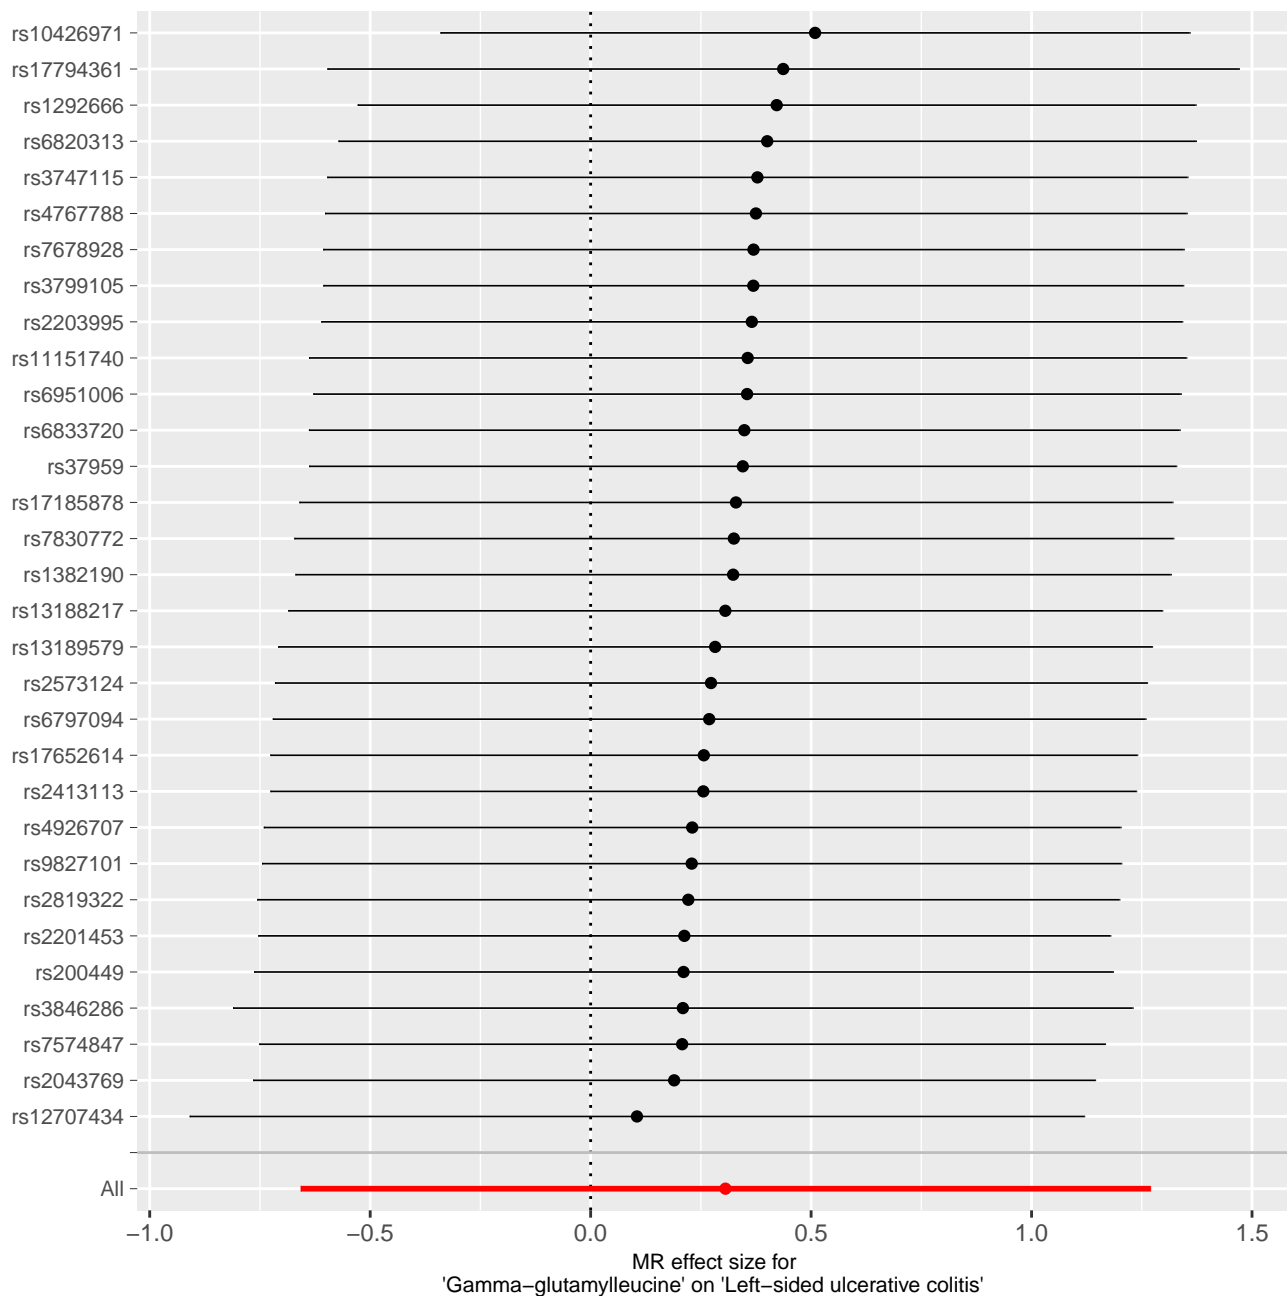

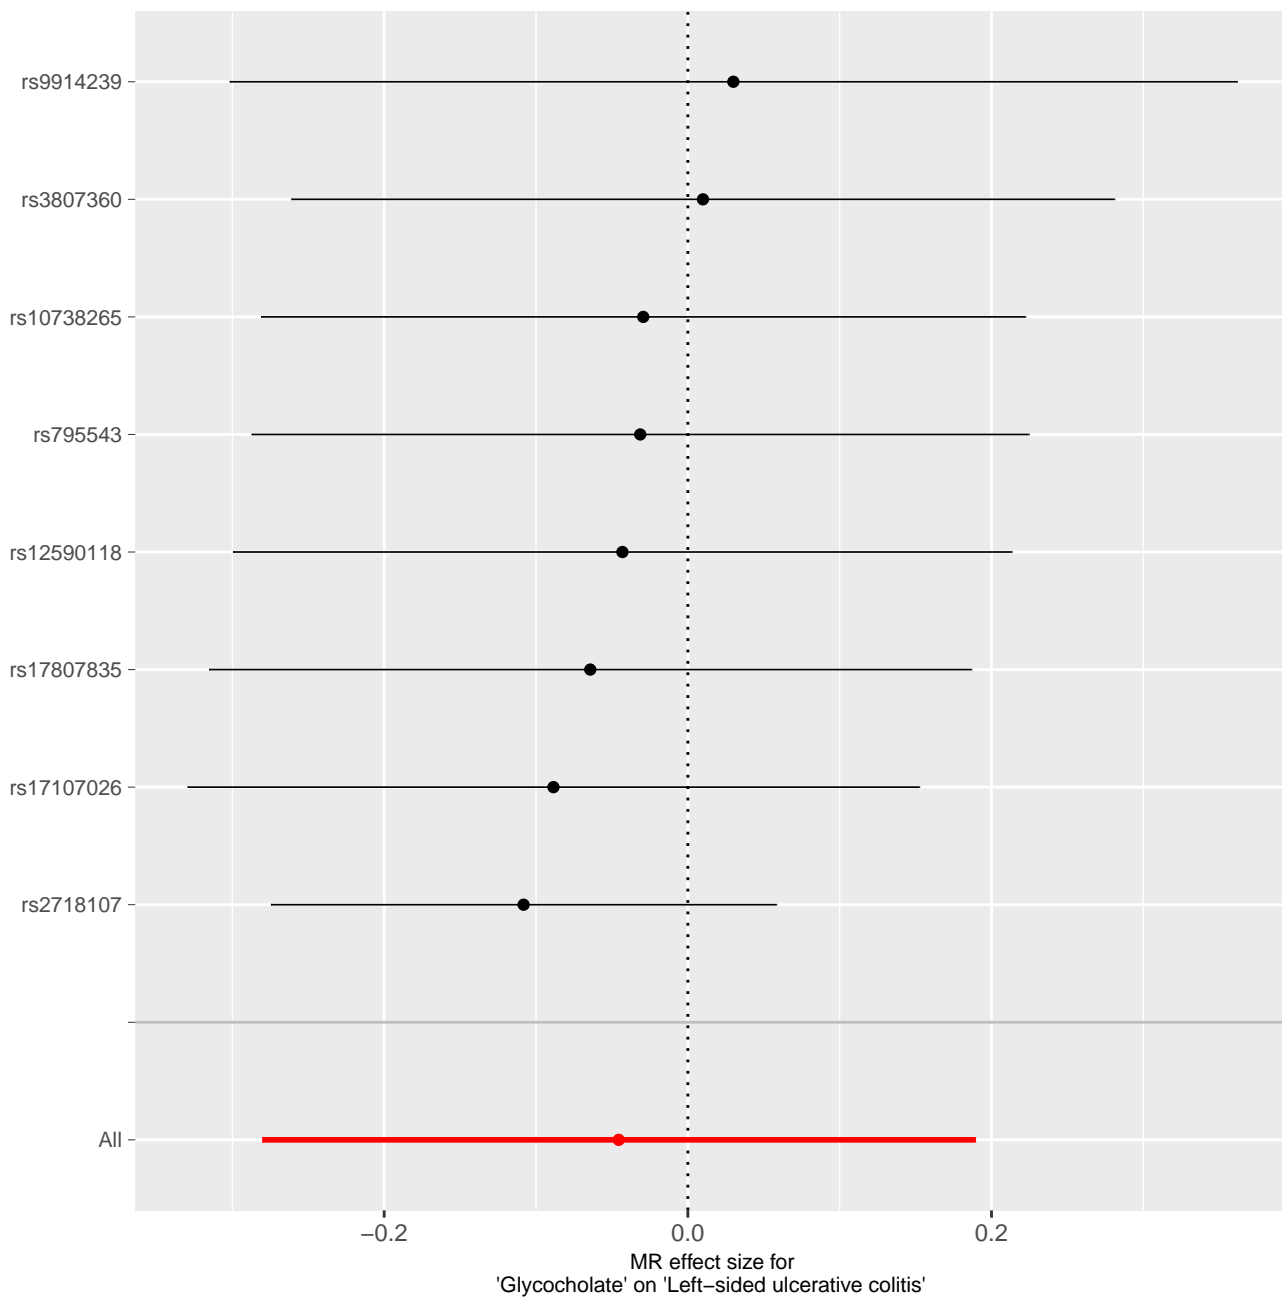

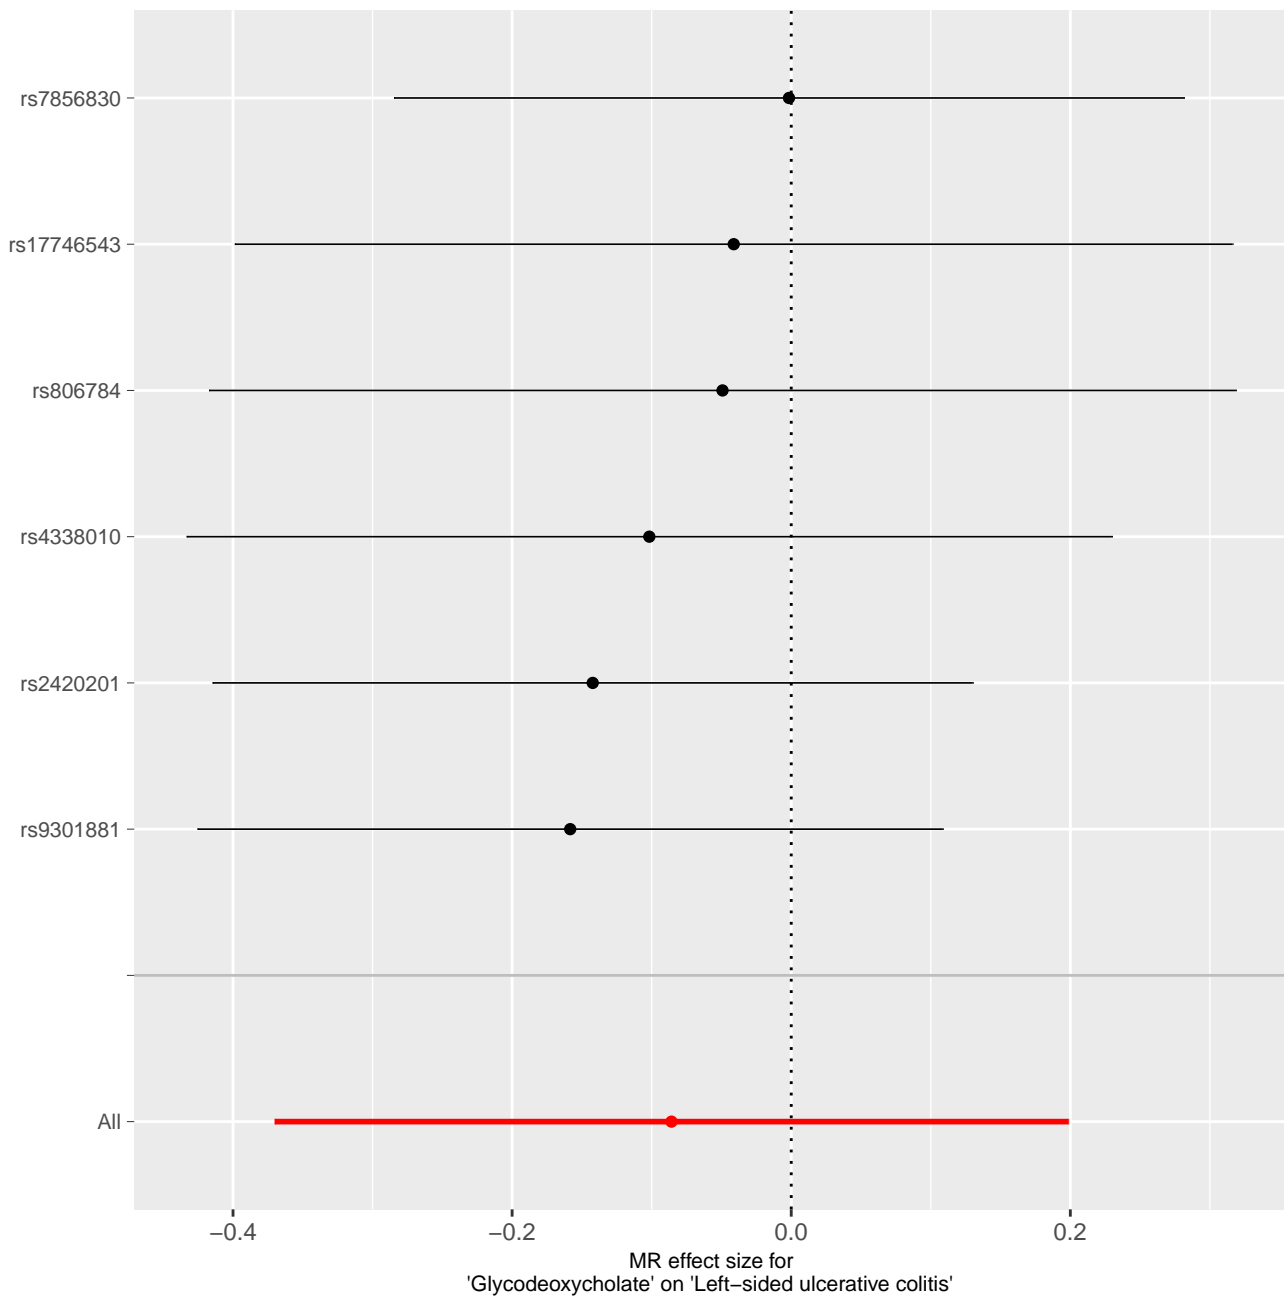

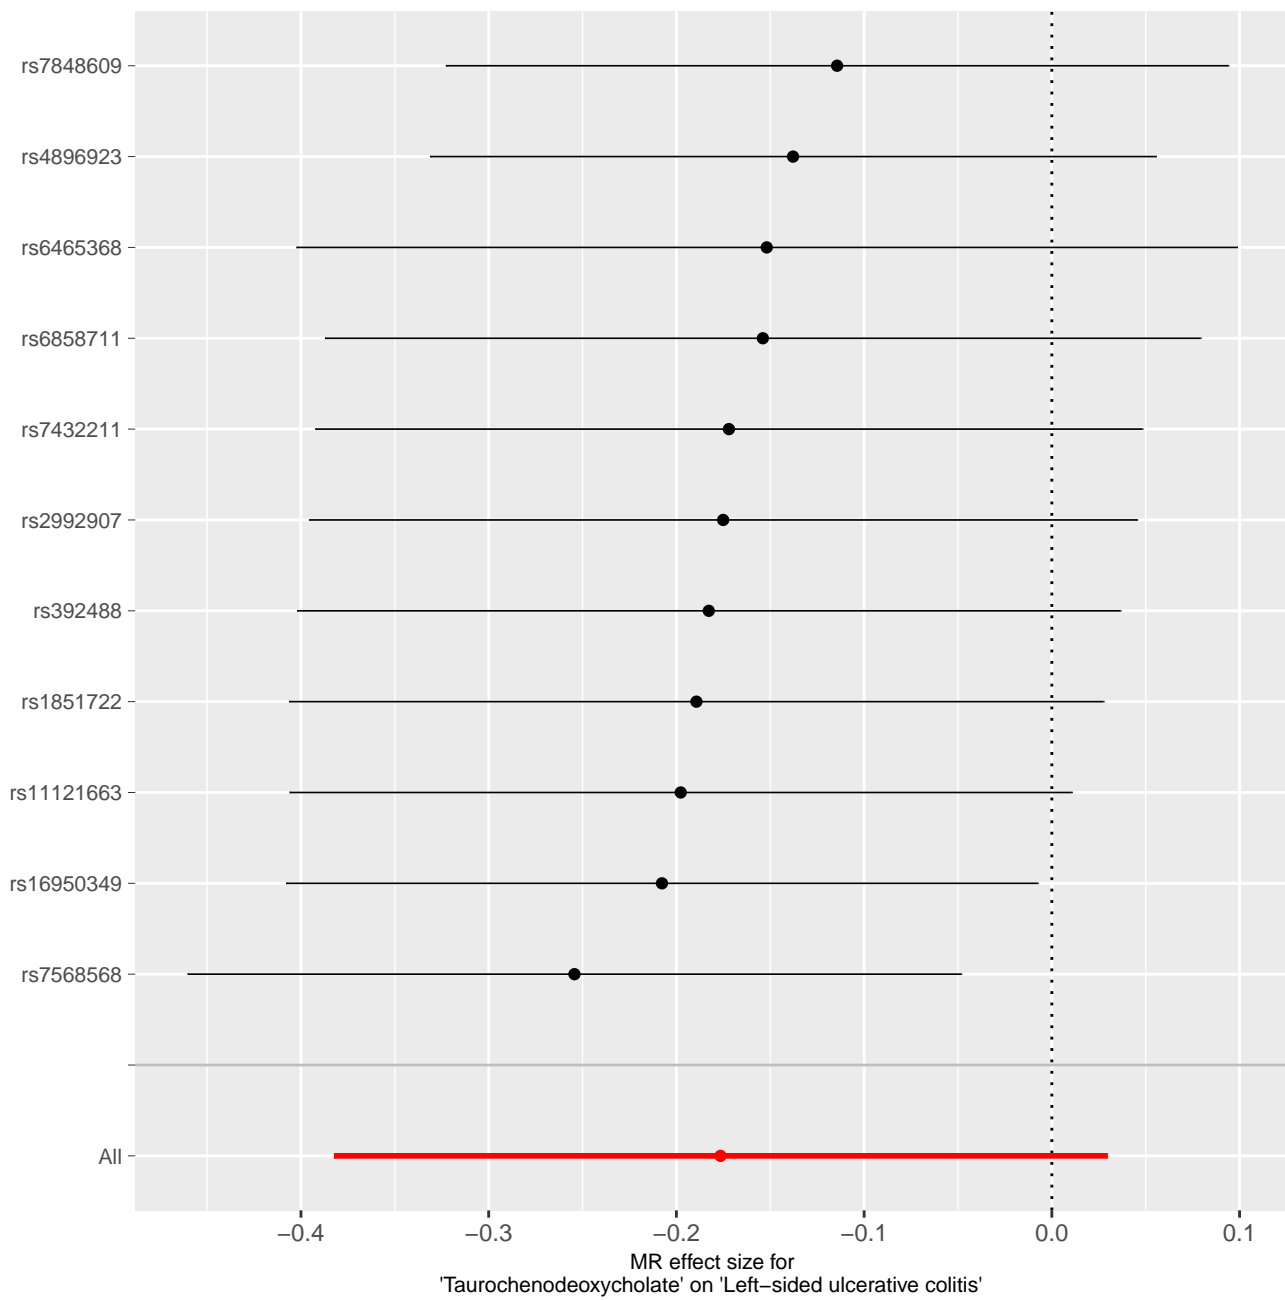

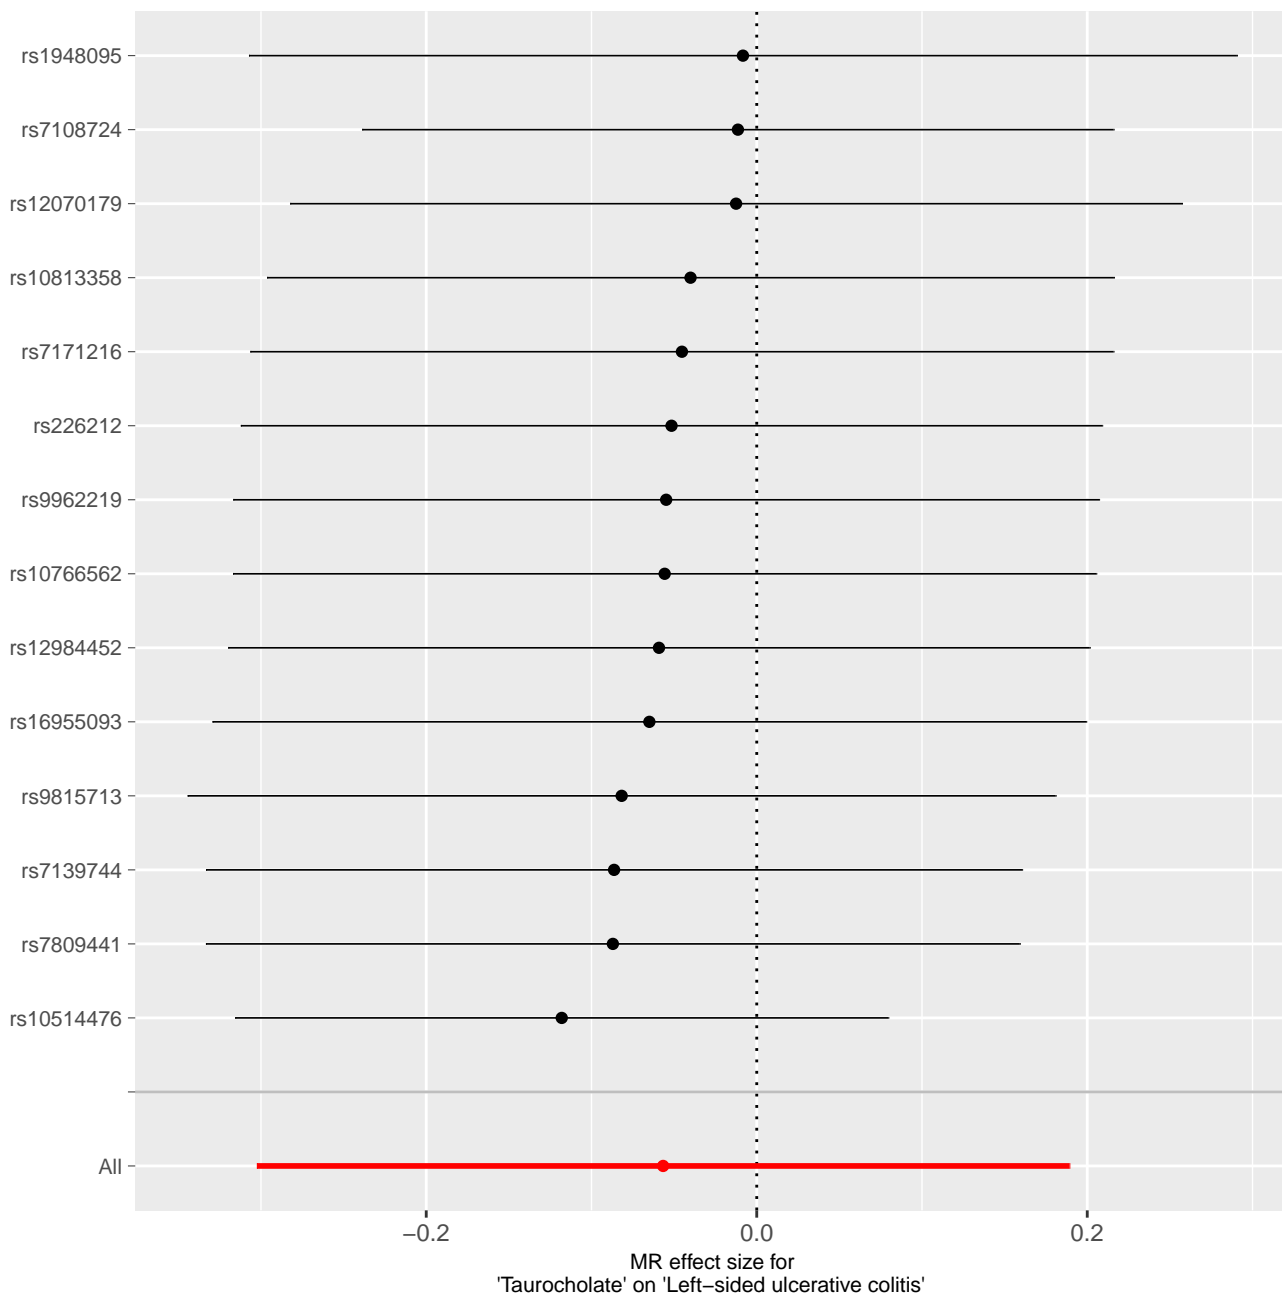



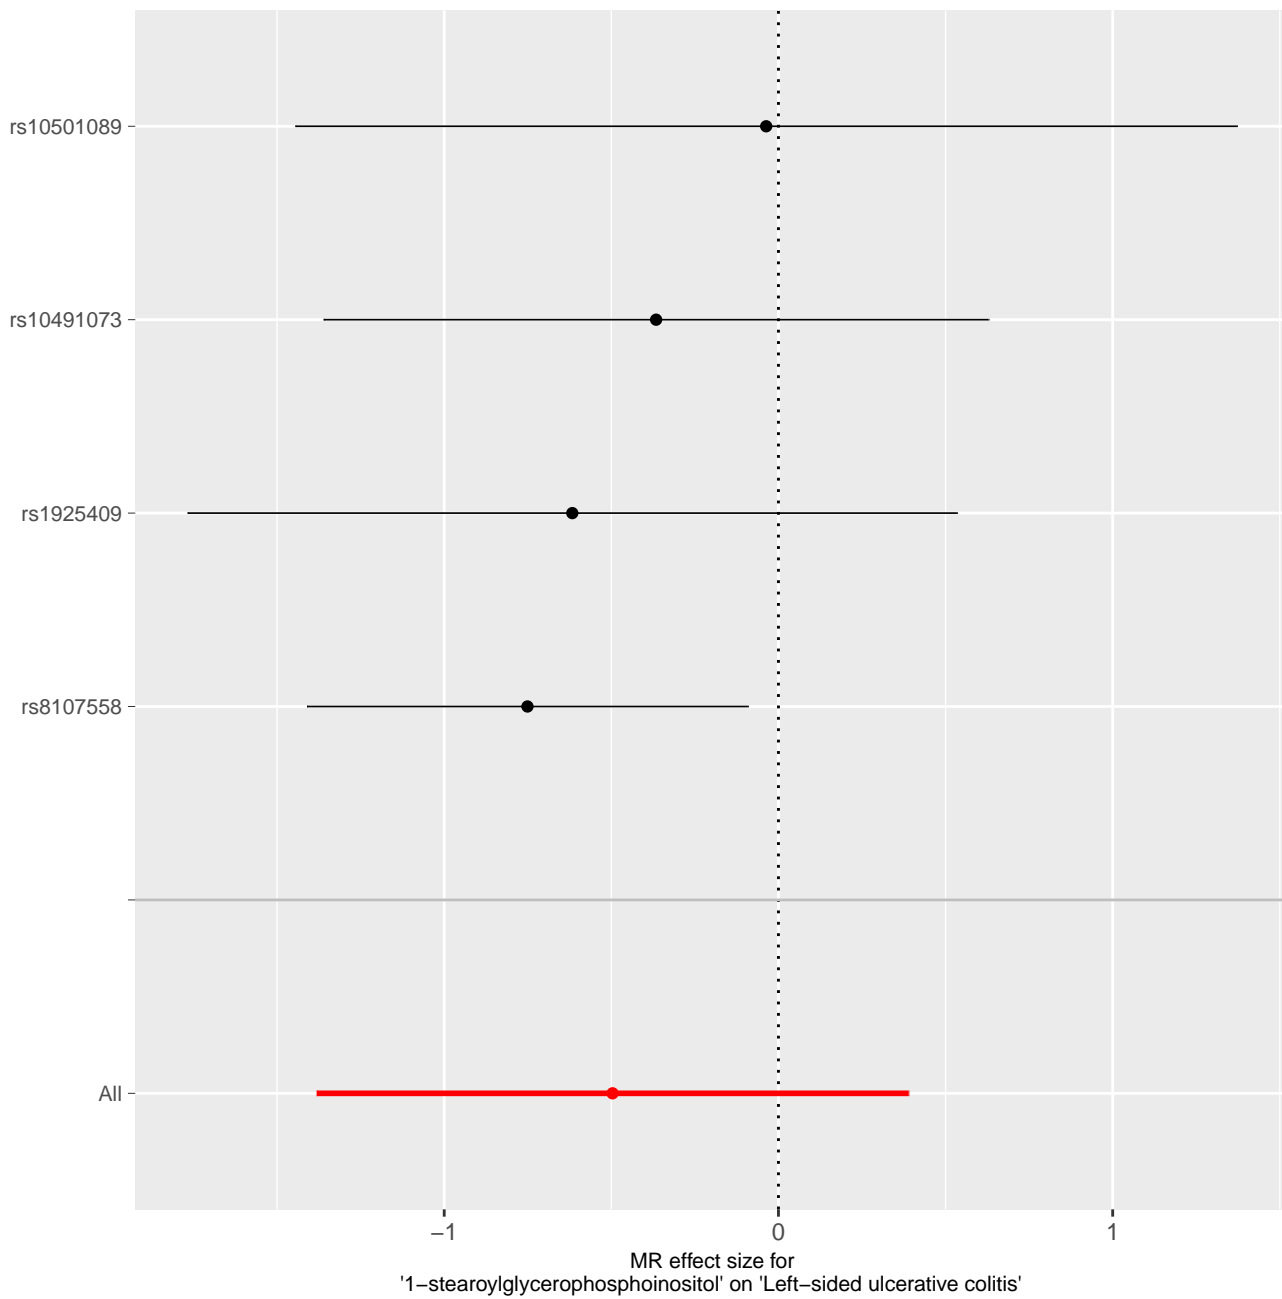

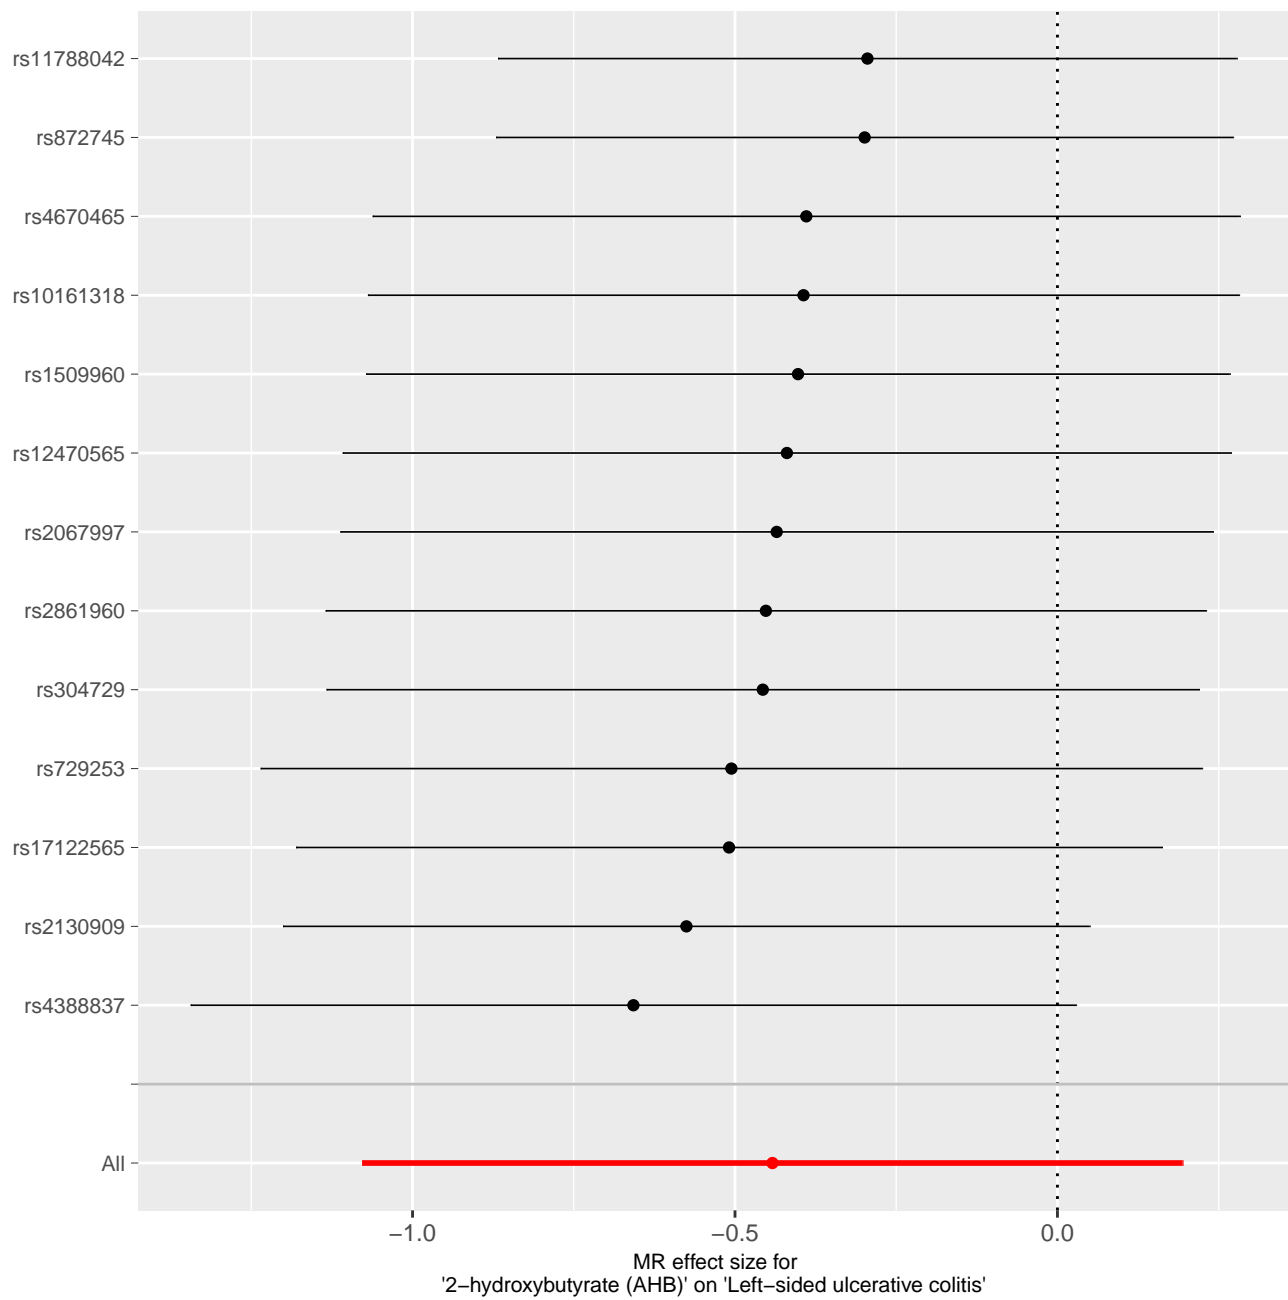

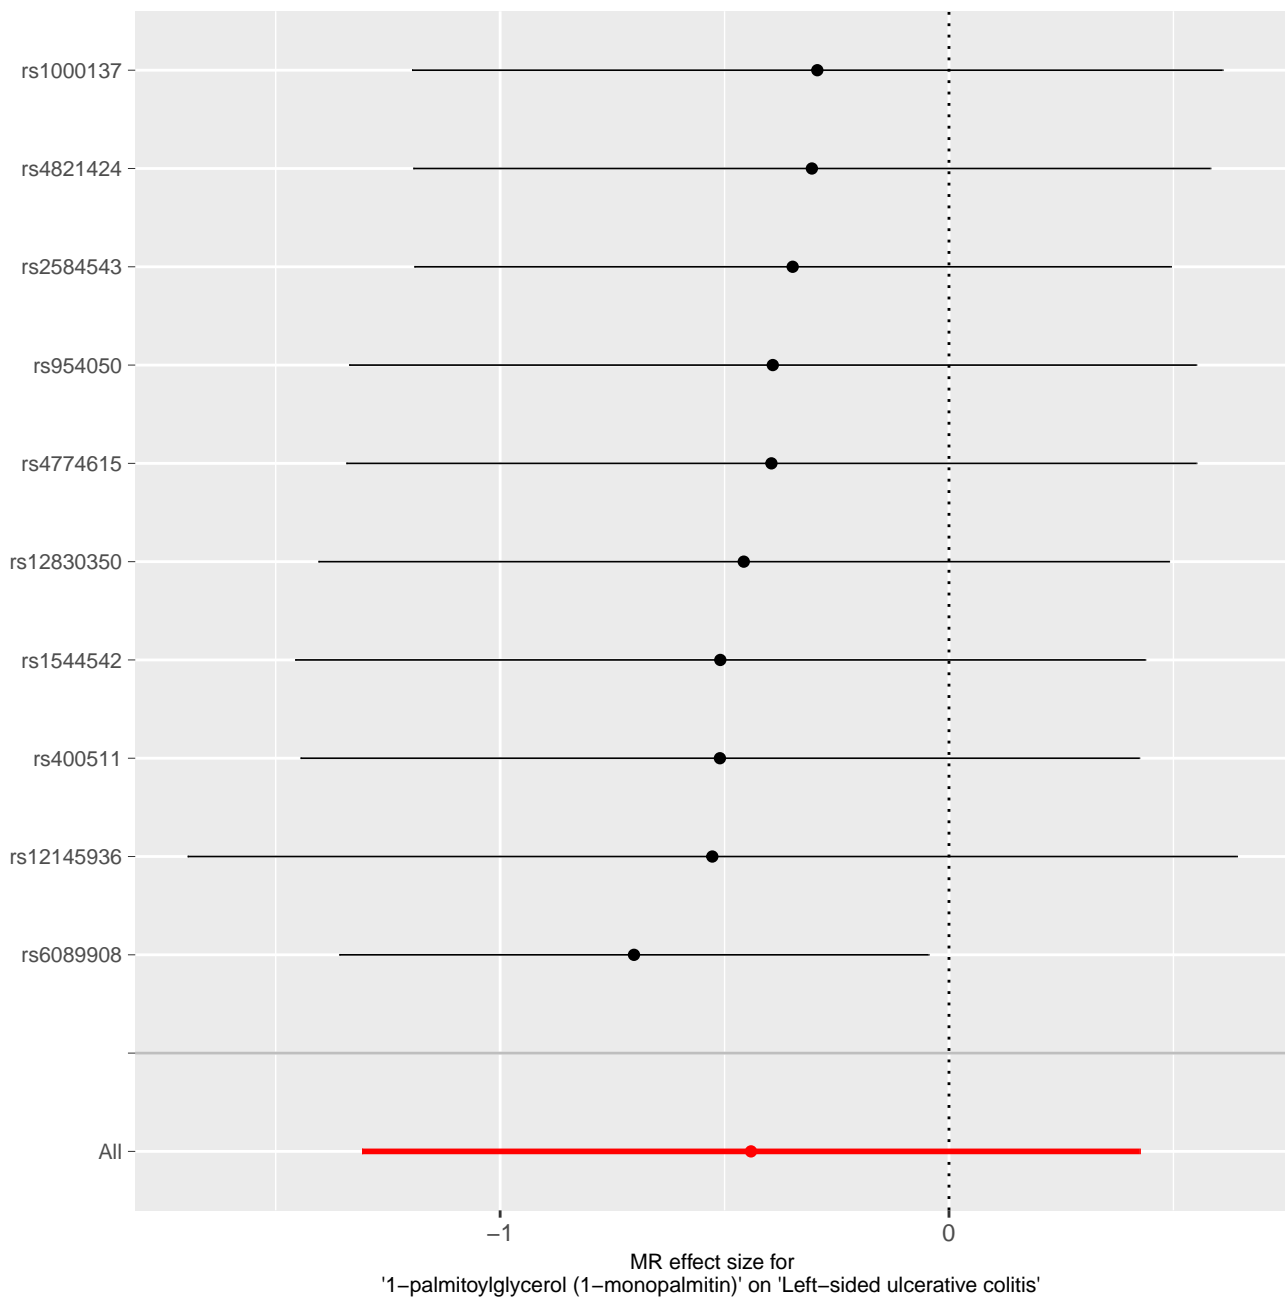

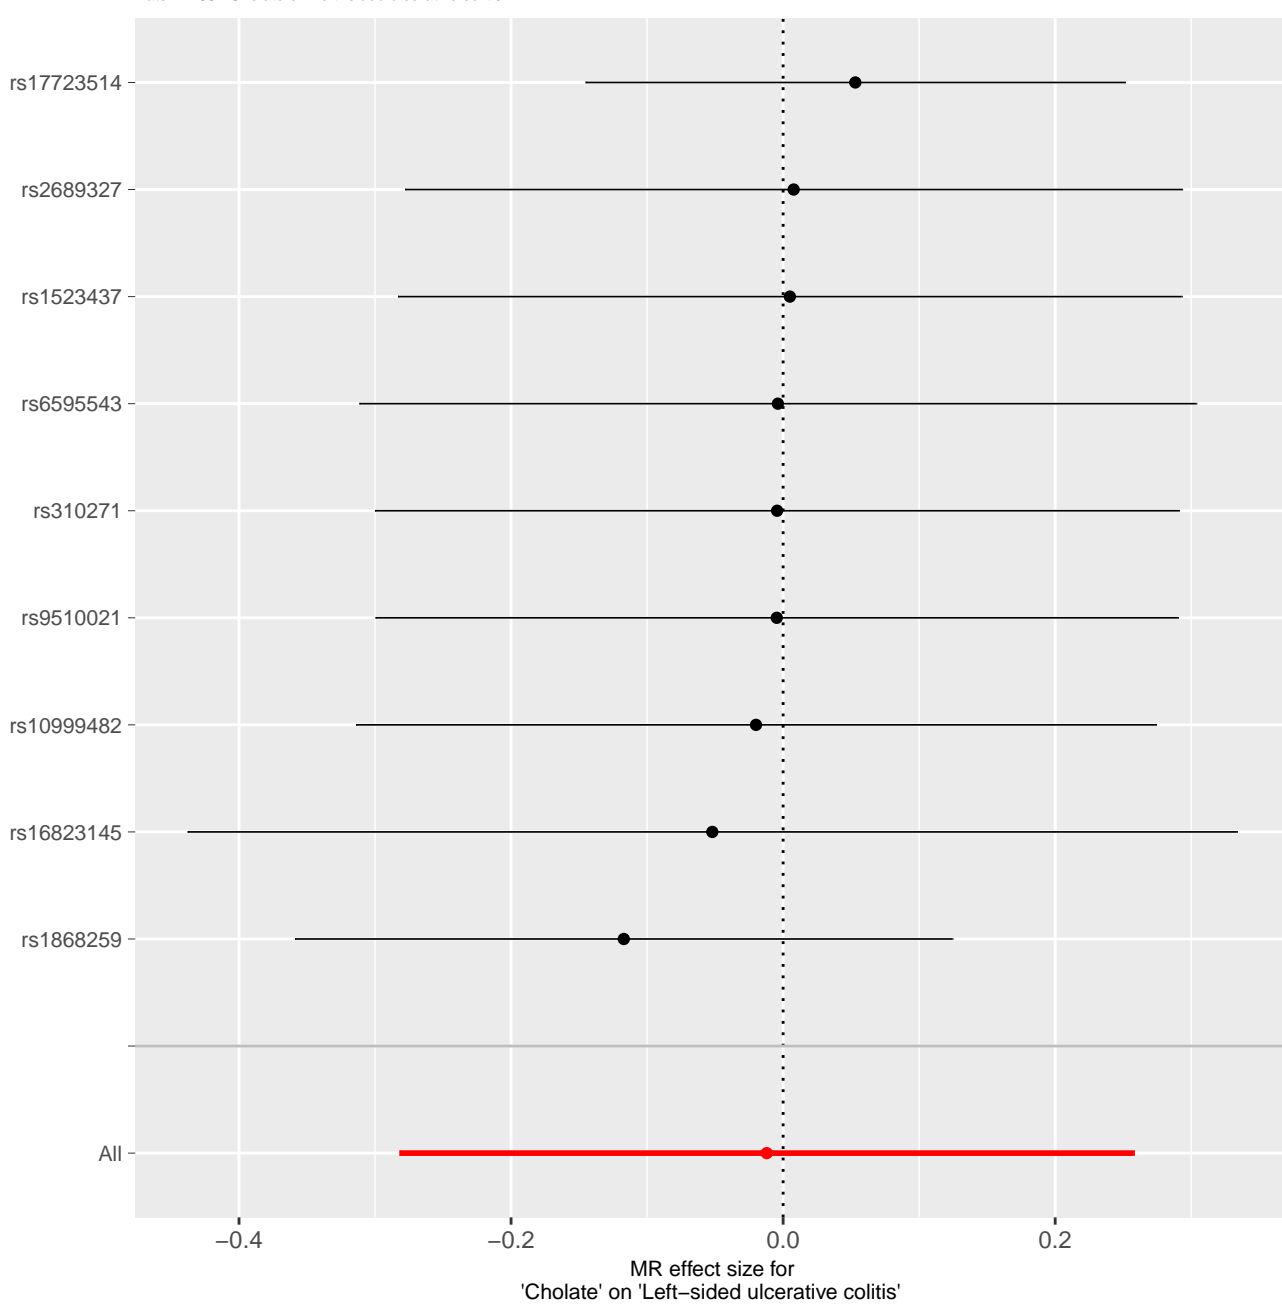

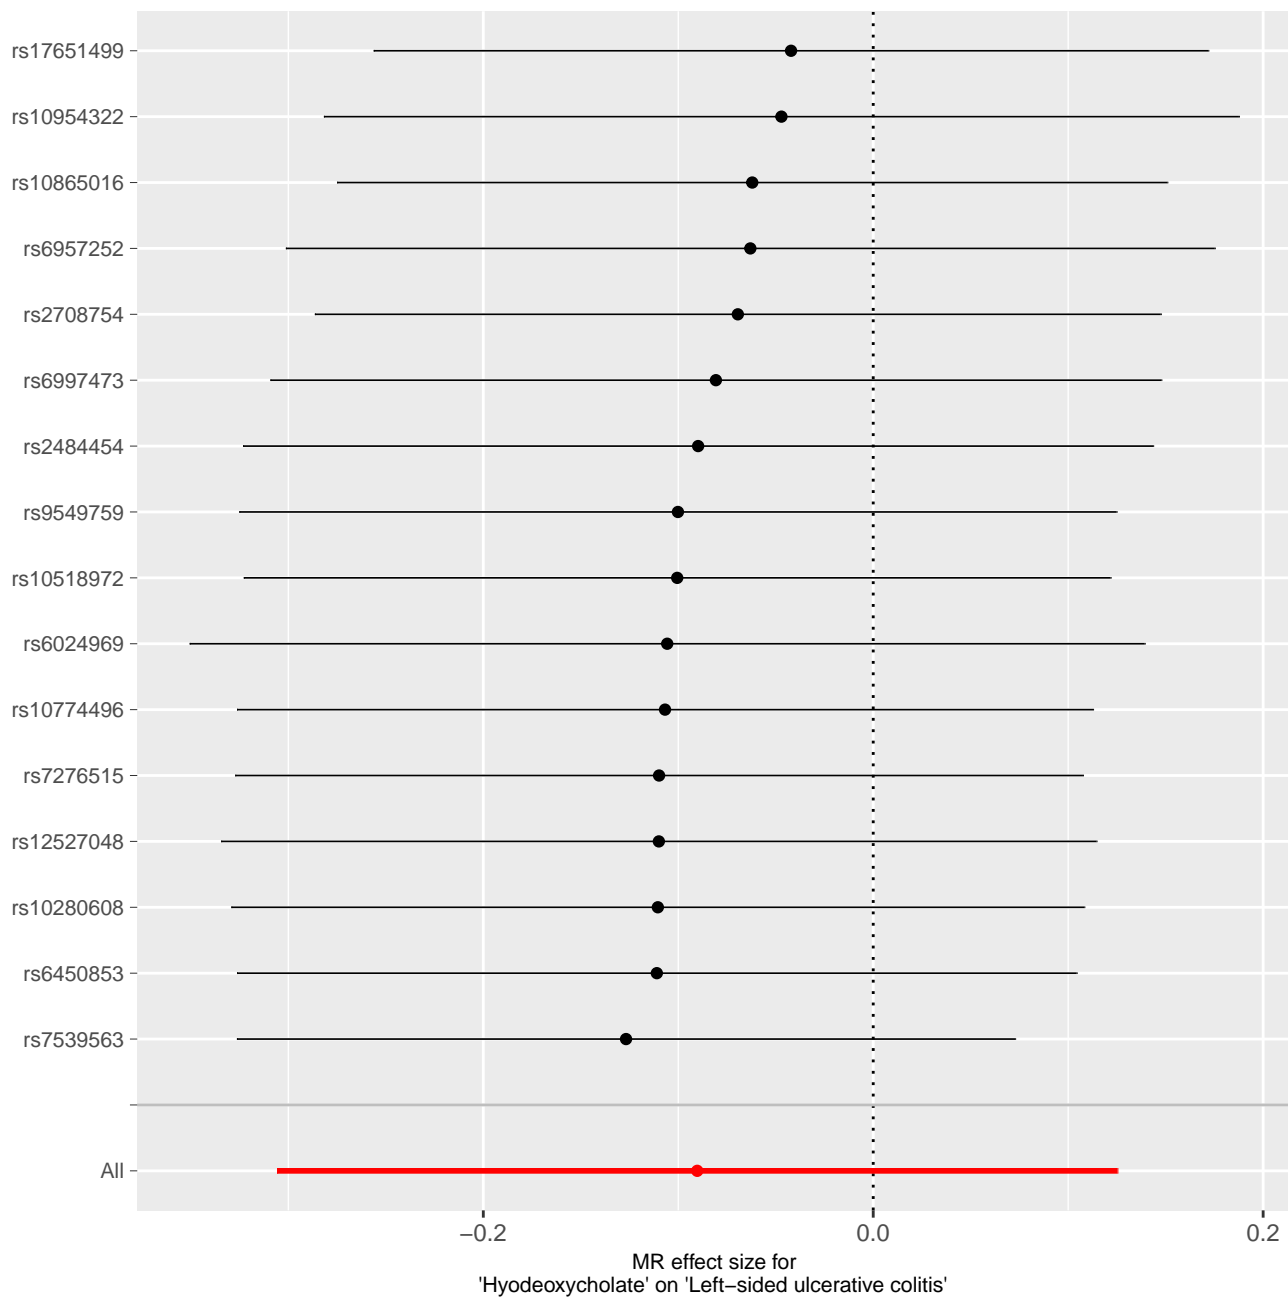

MR effect size for  
'Hyodeoxycholate' on 'Left-sided ulcerative colitis'

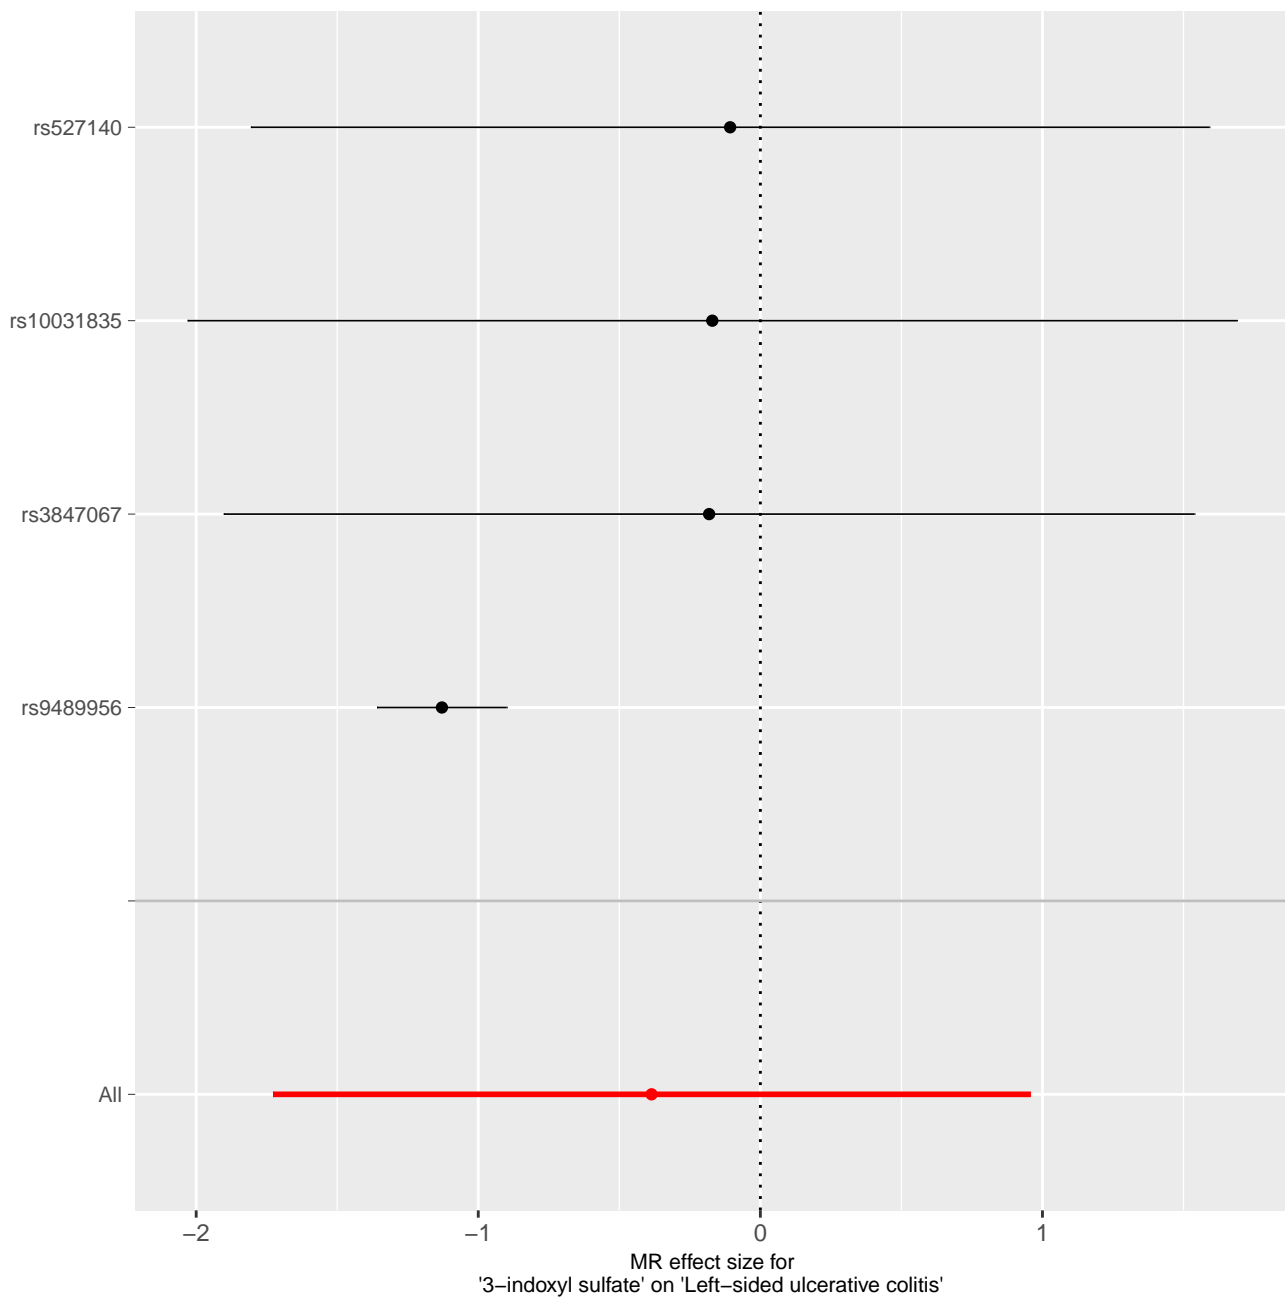

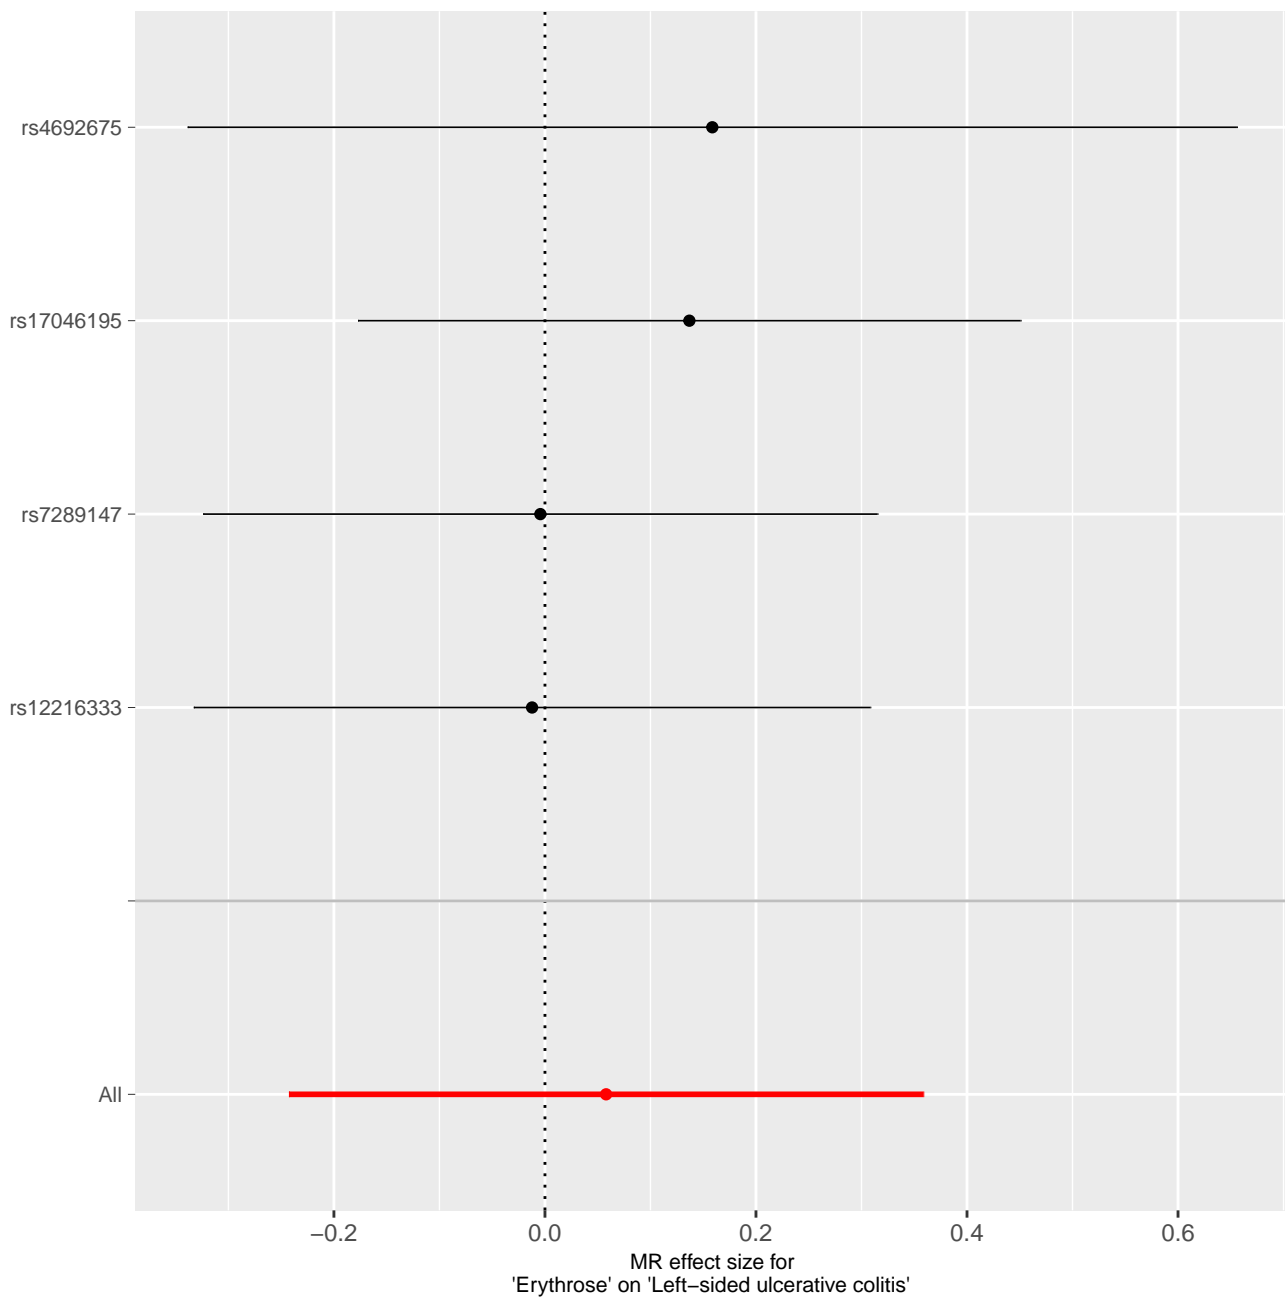

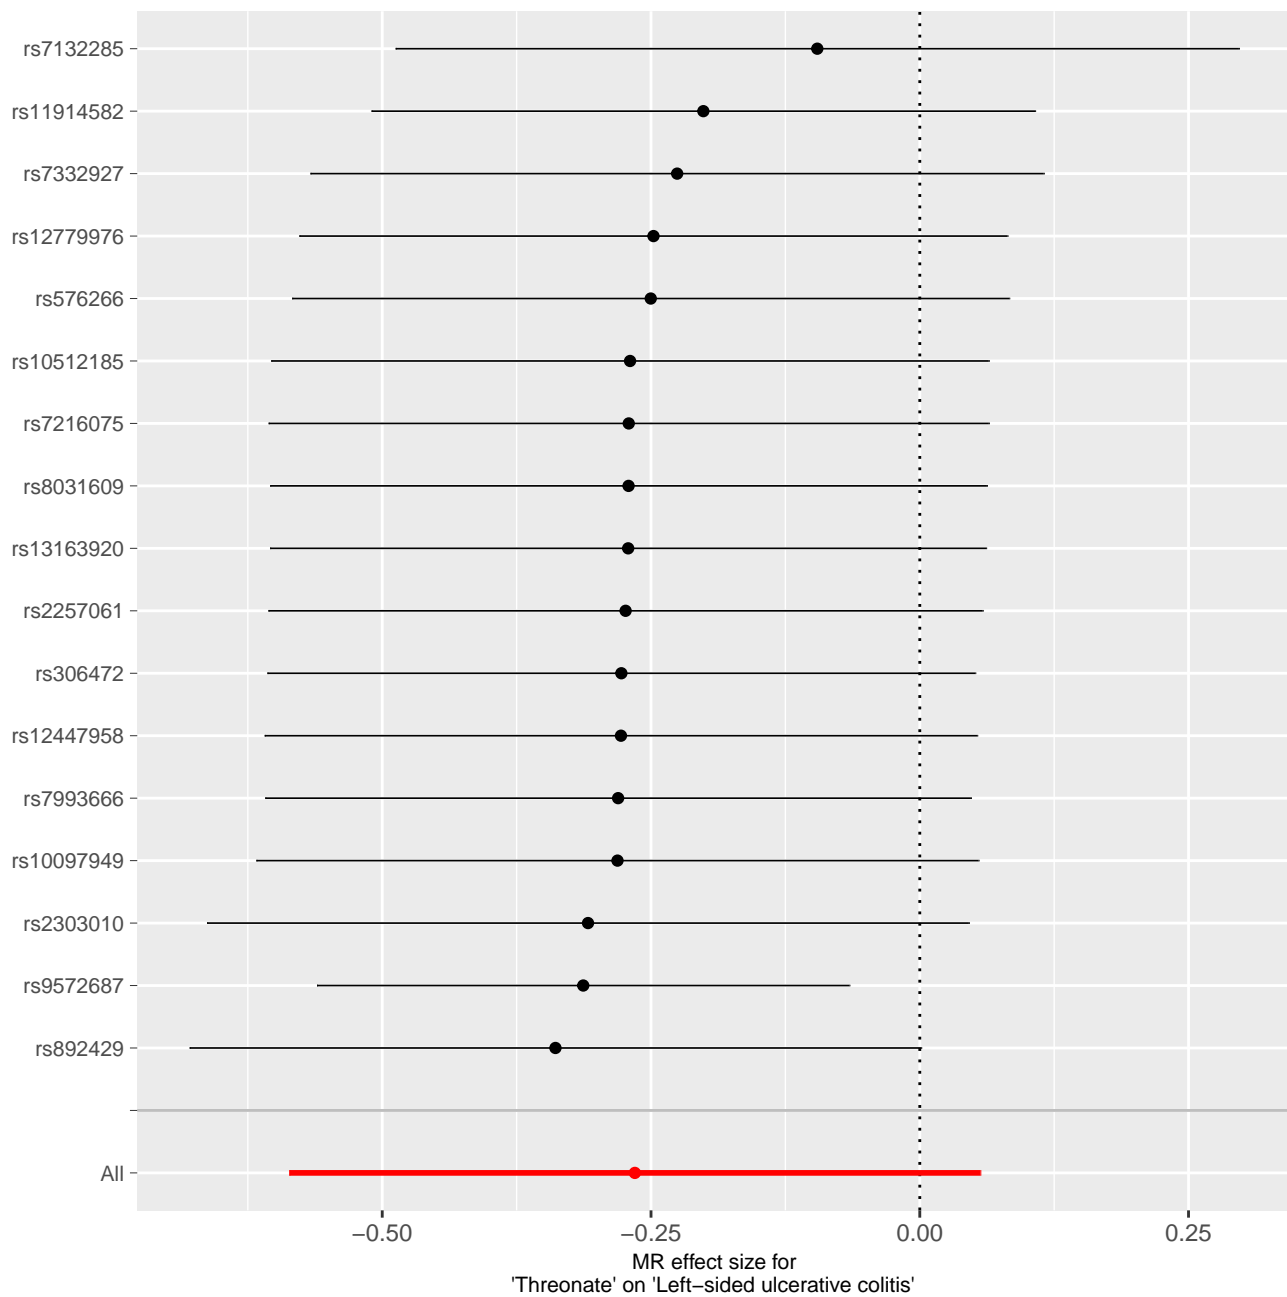



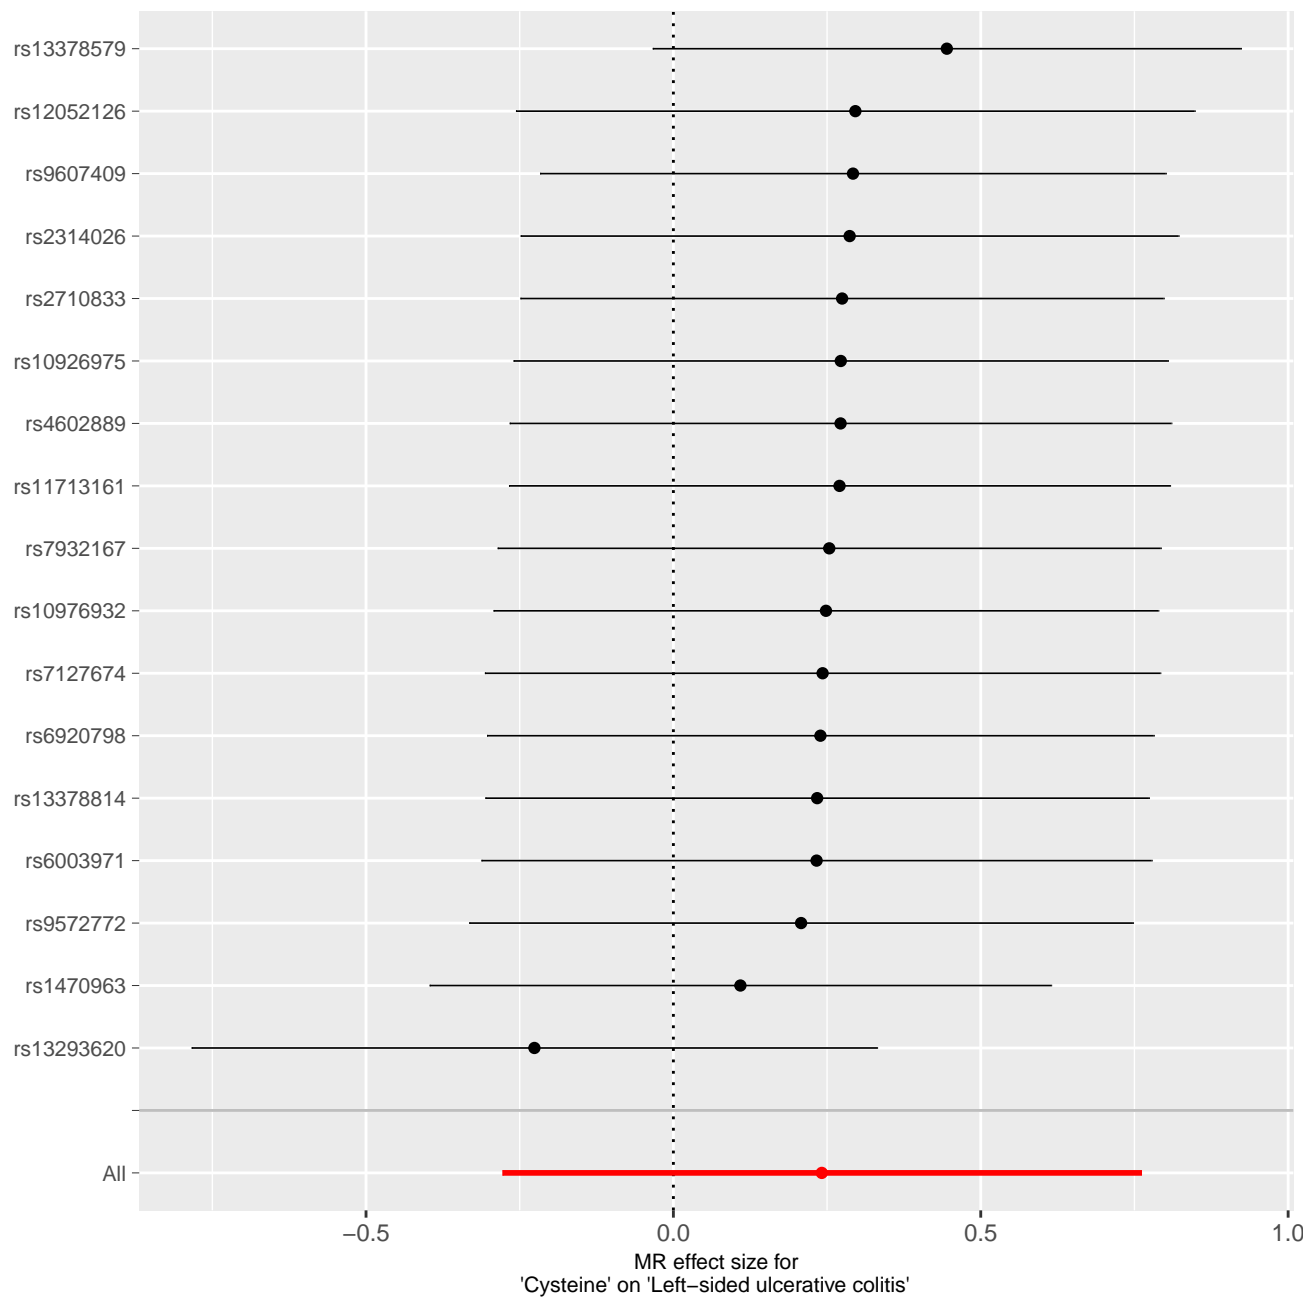

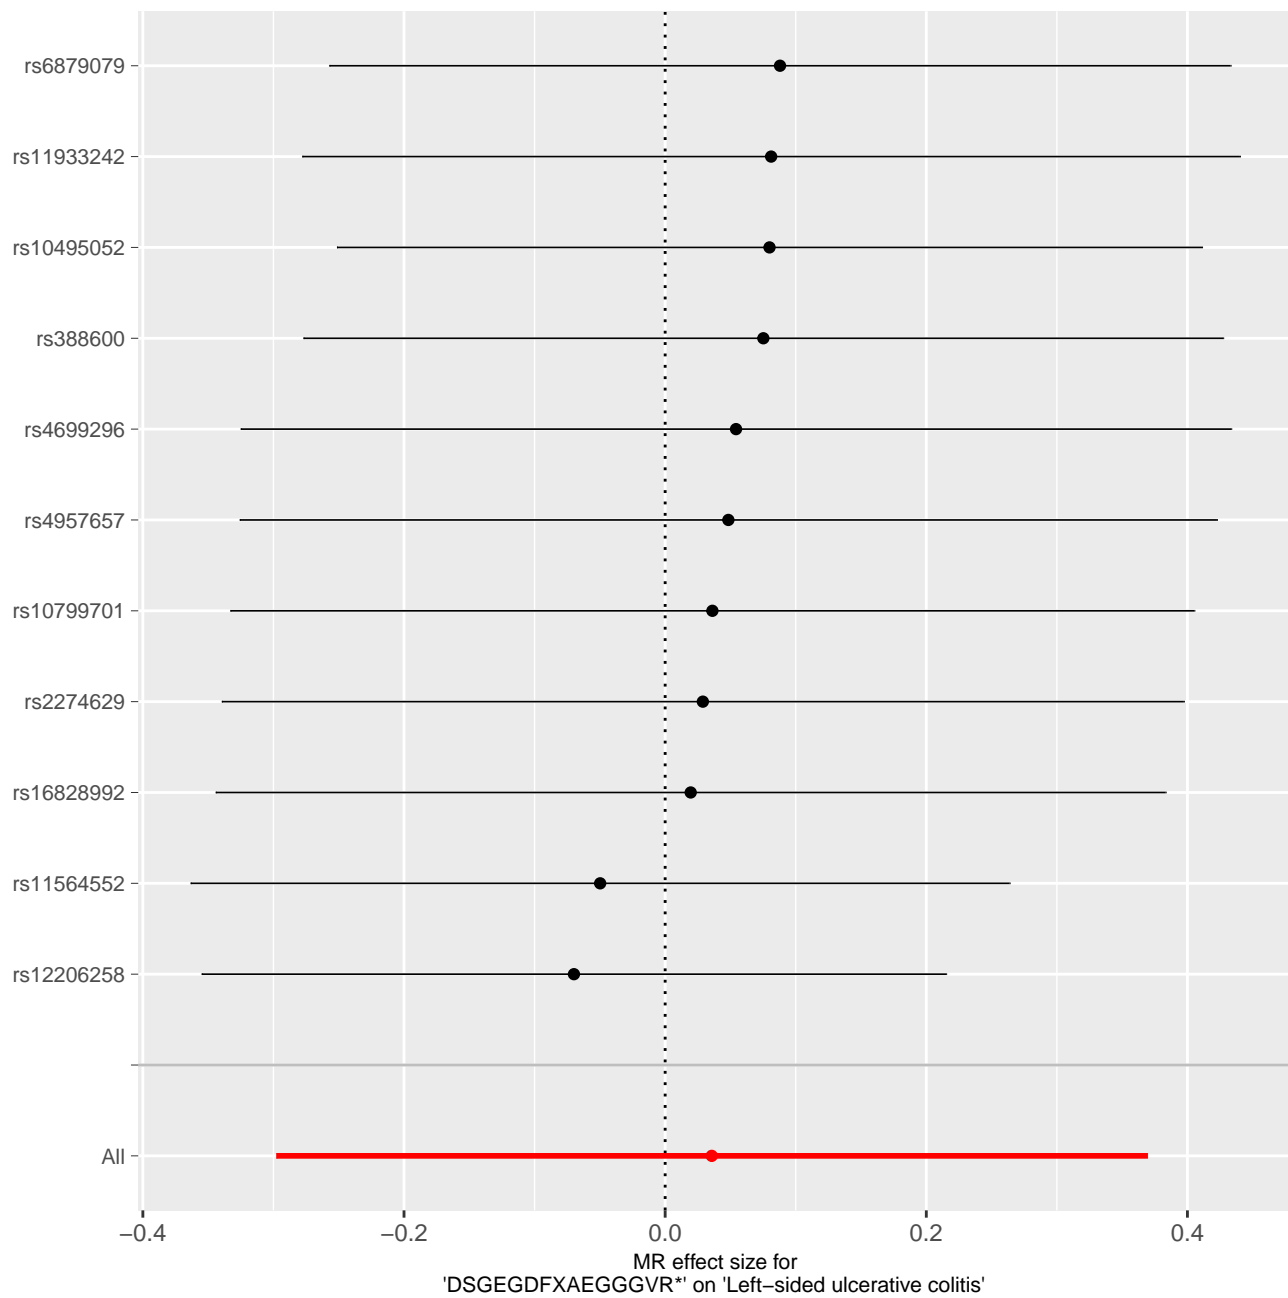

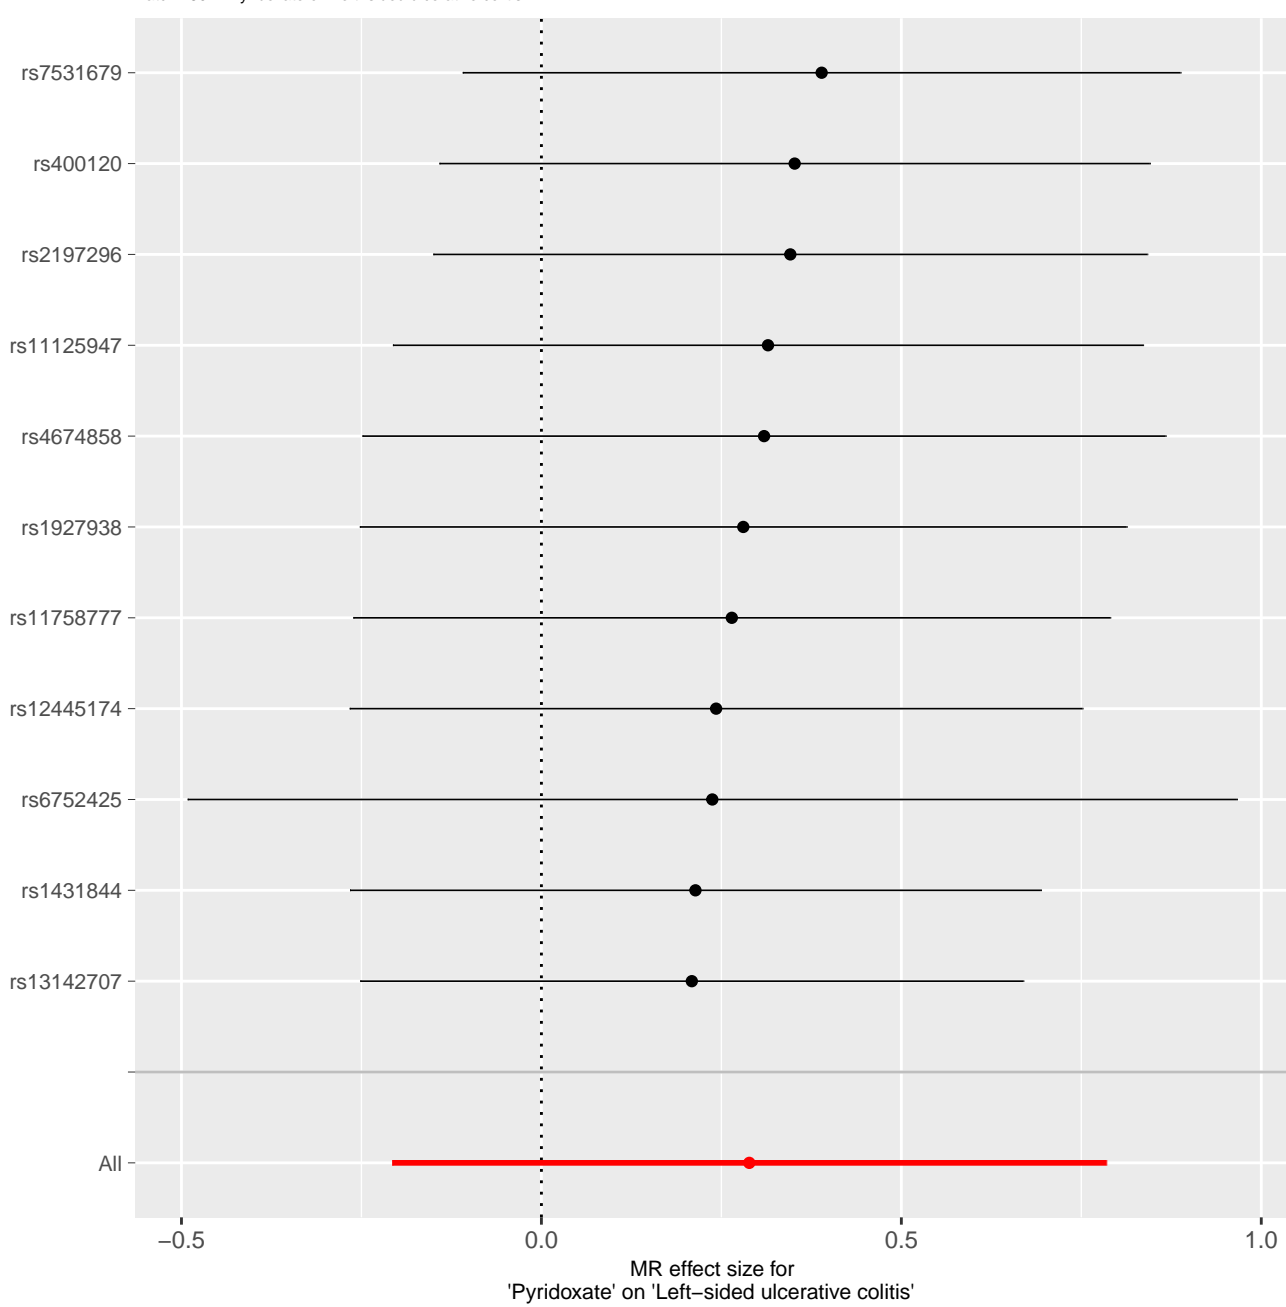

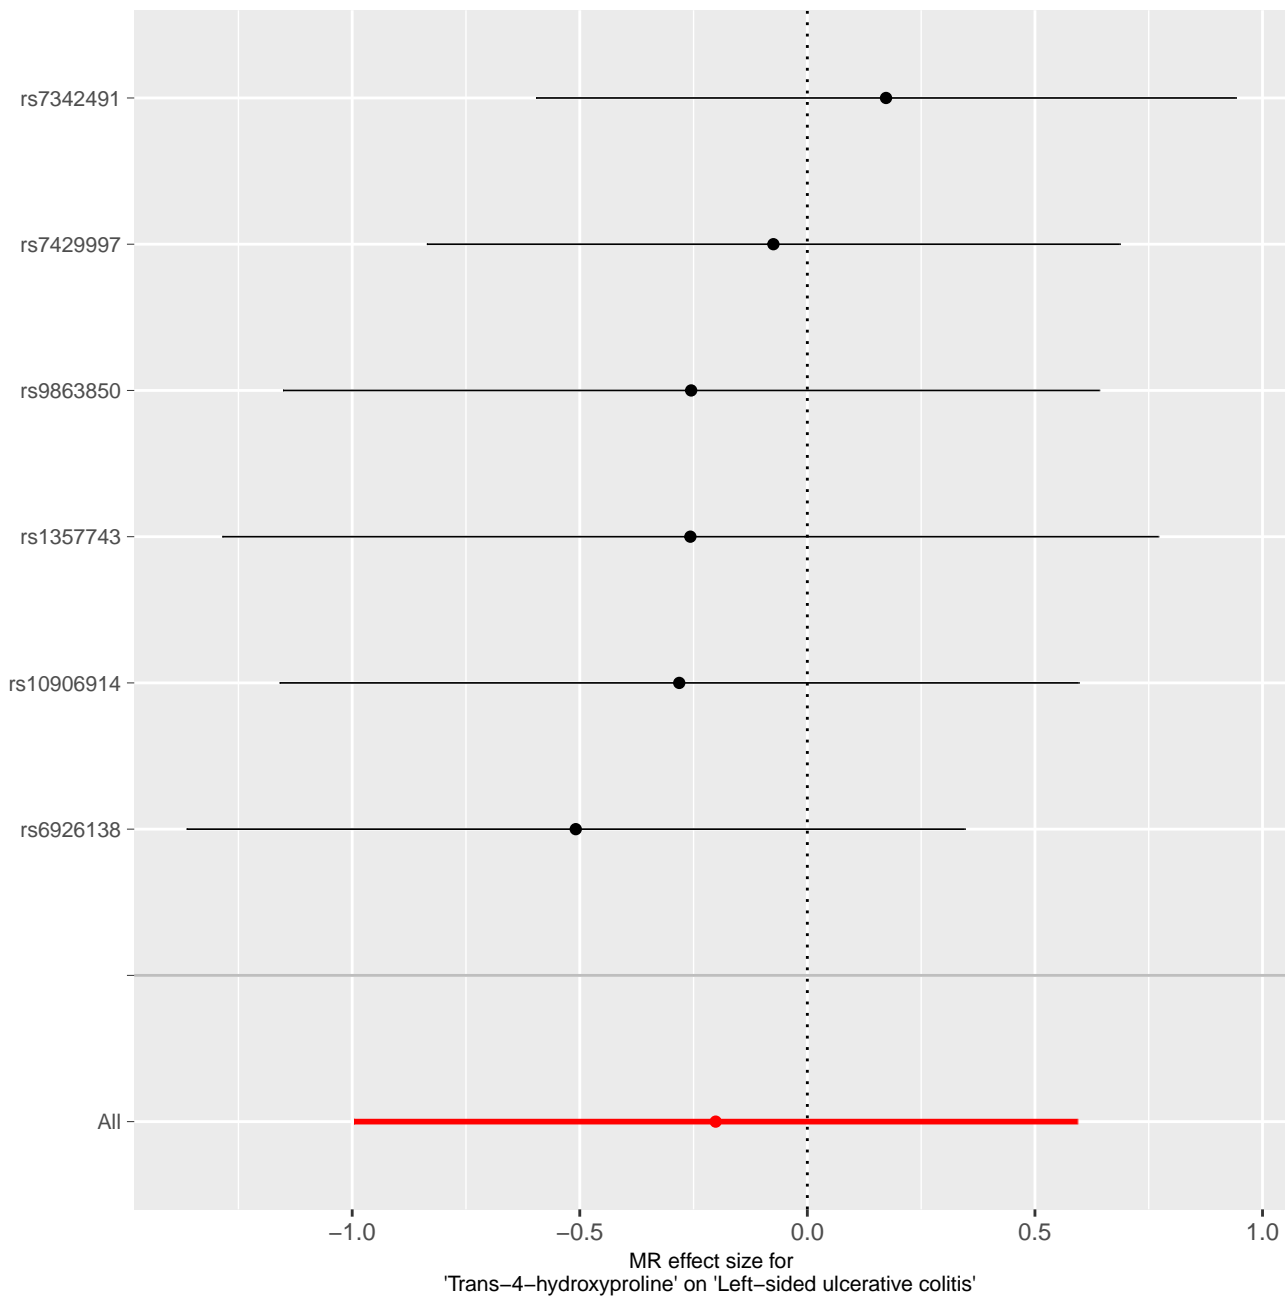

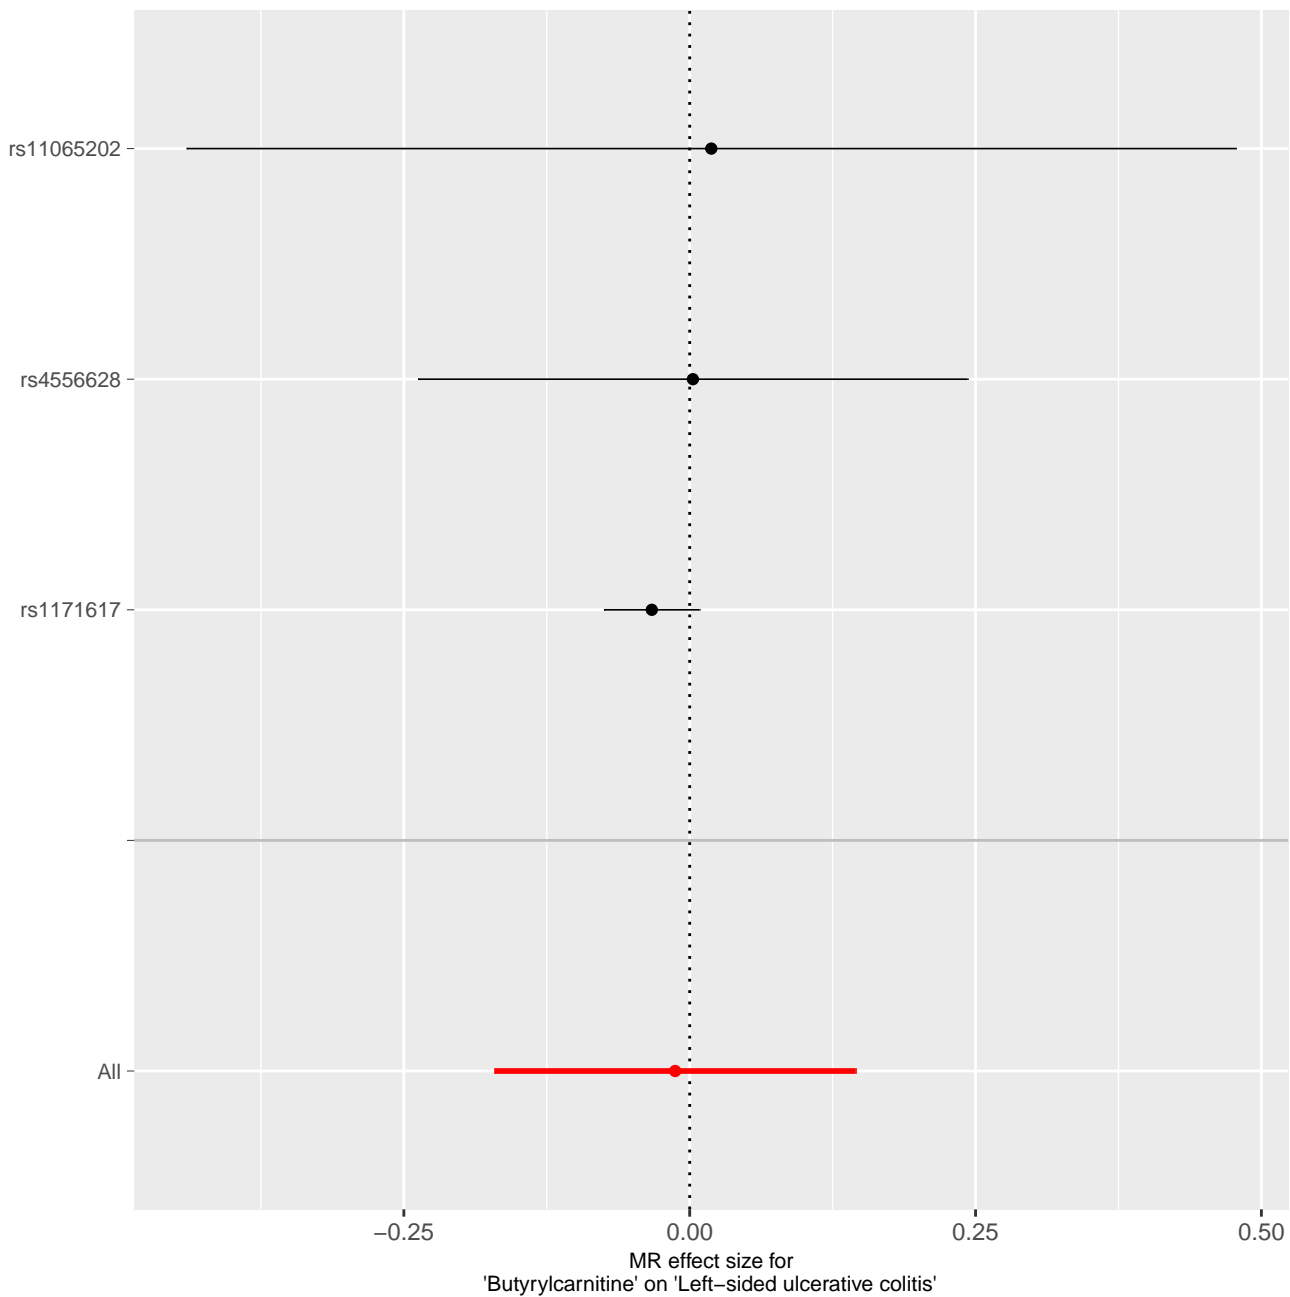

Batch 1523 : Caproate (6:0) on Left-sided ulcerative colitis

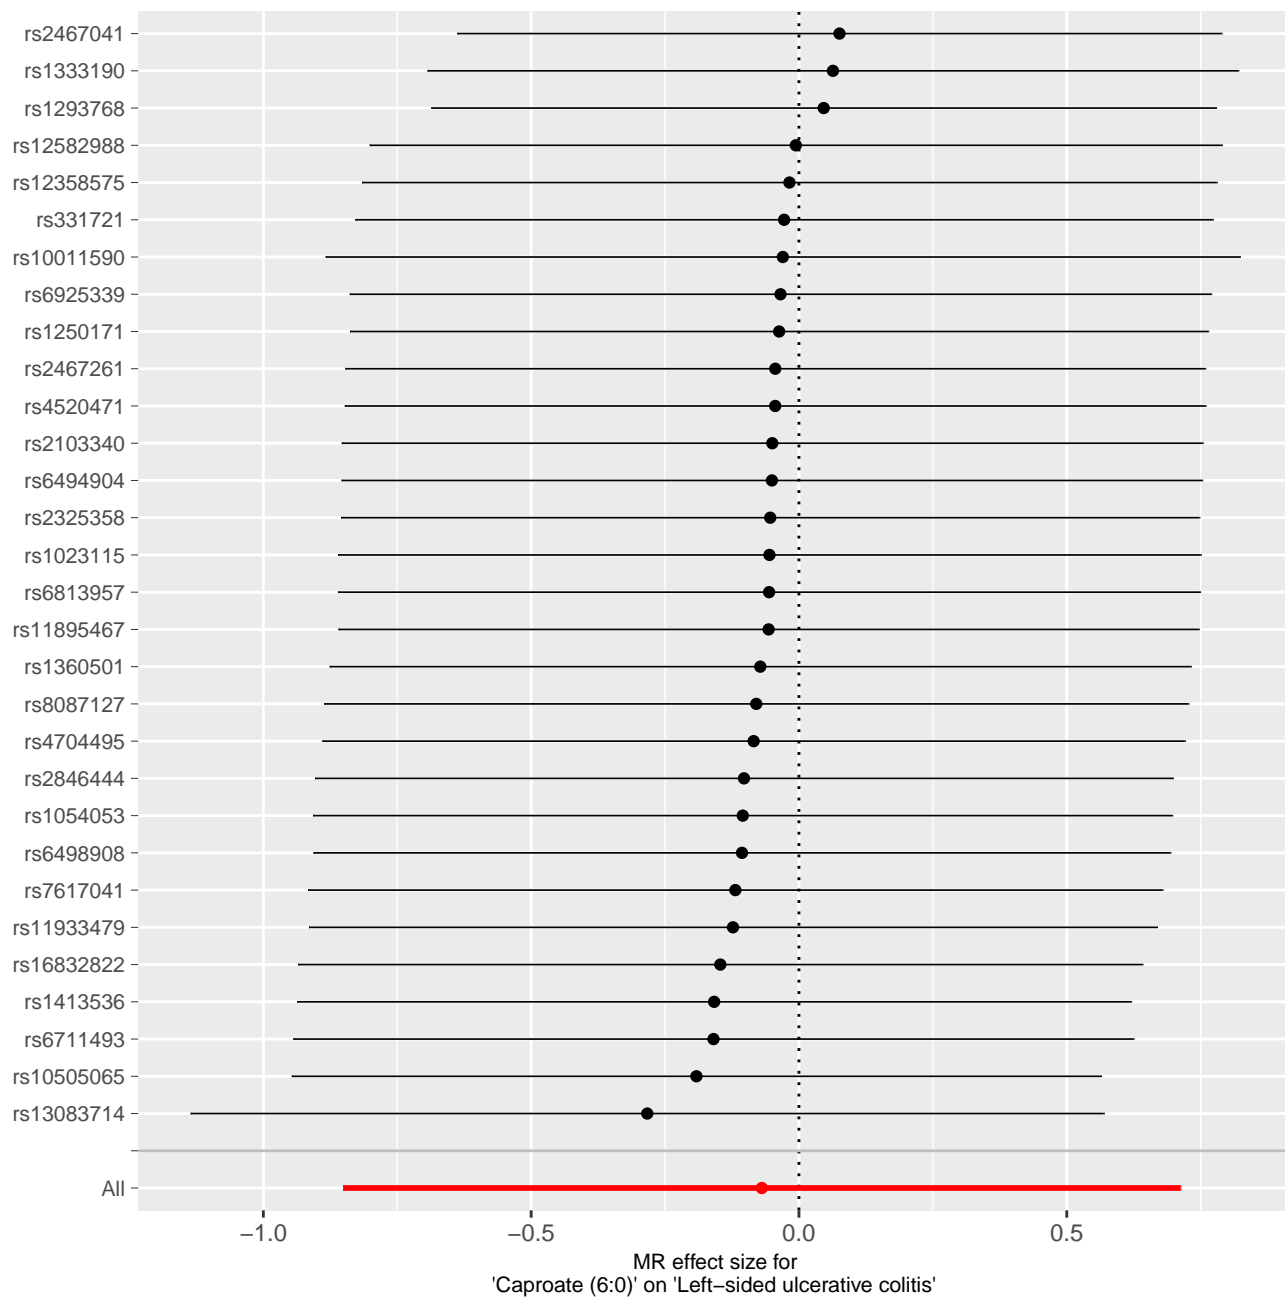

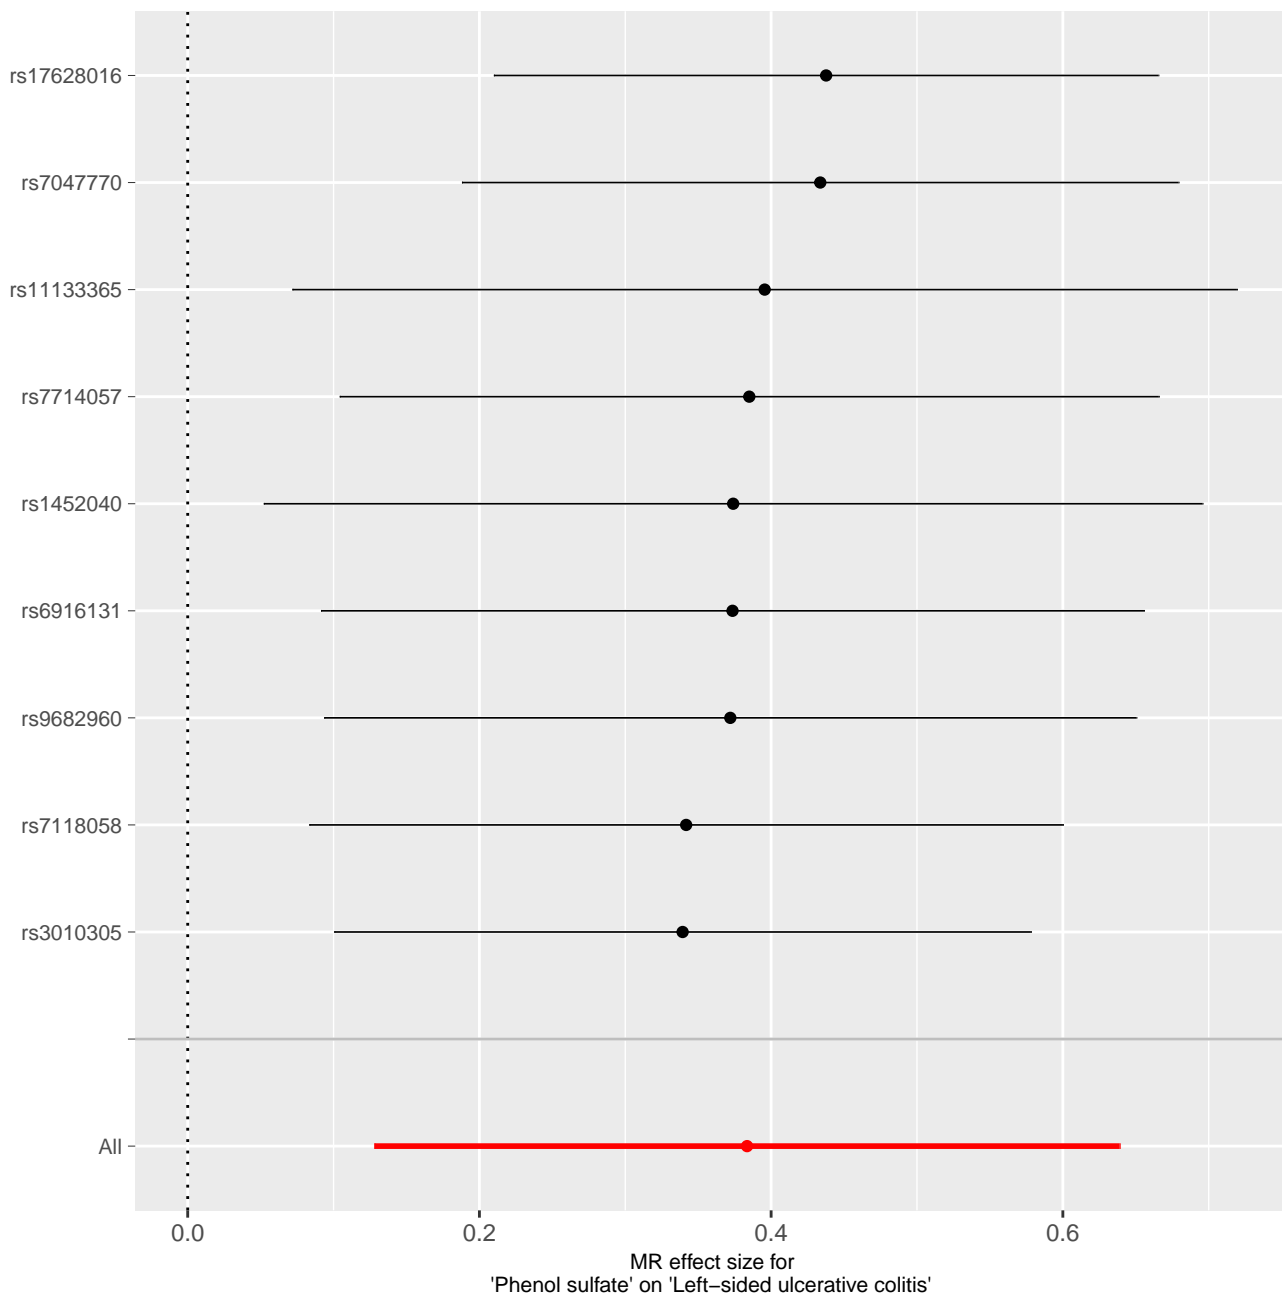

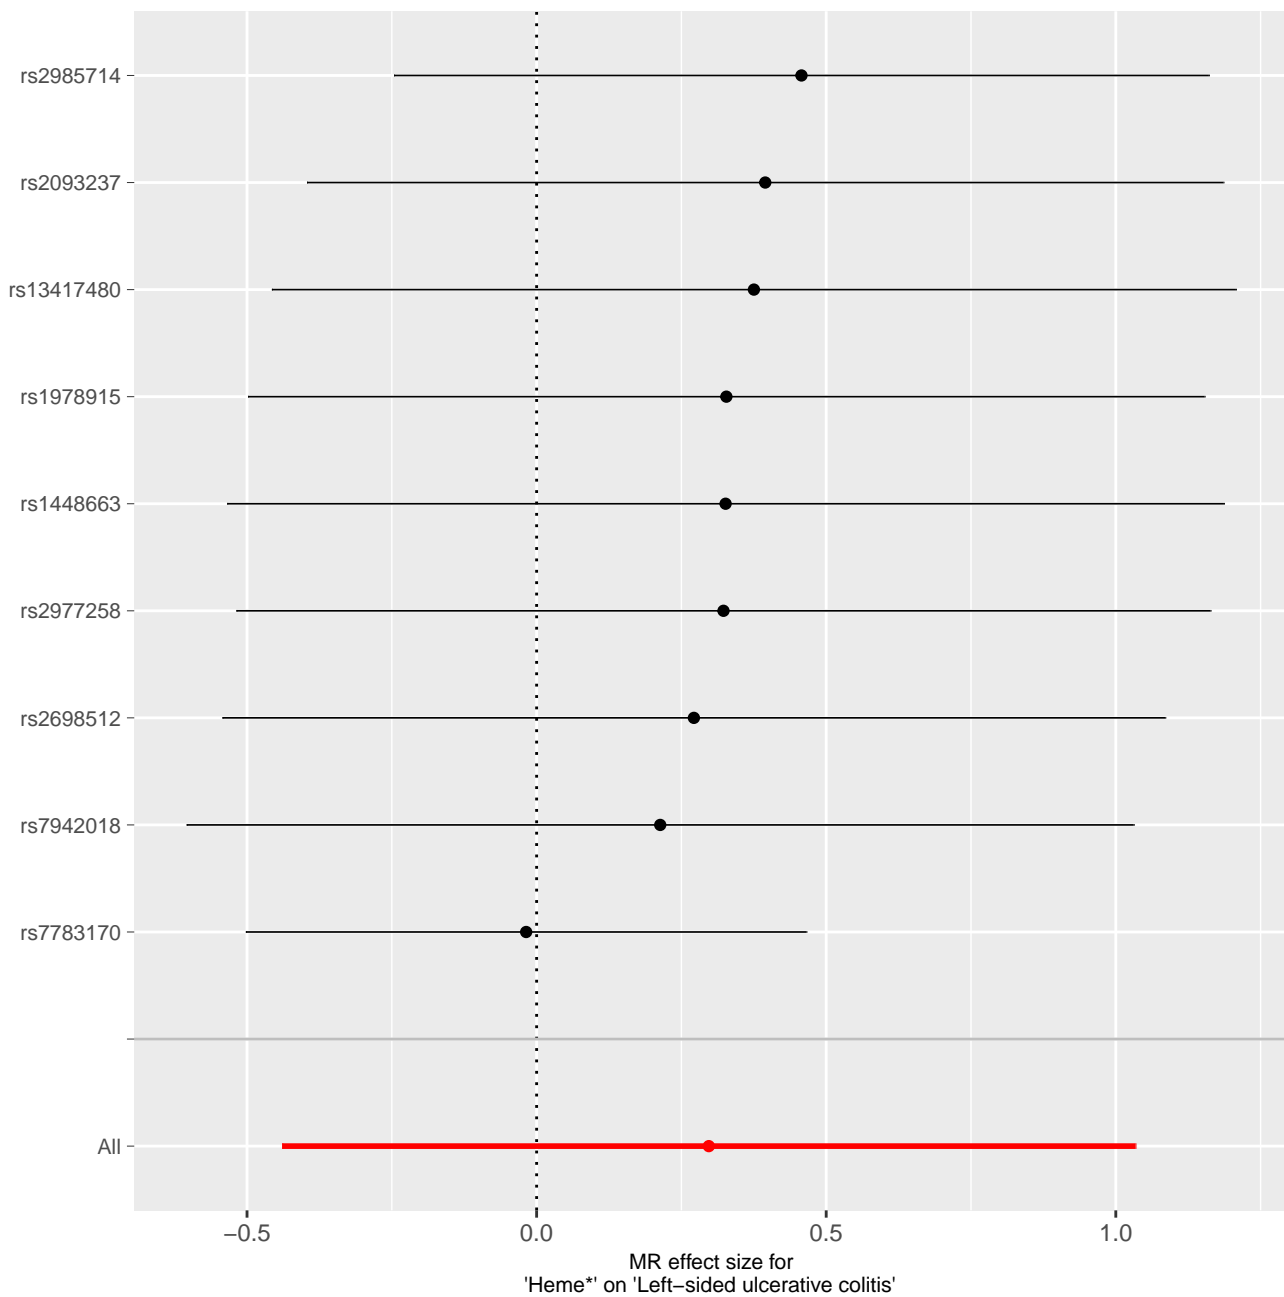



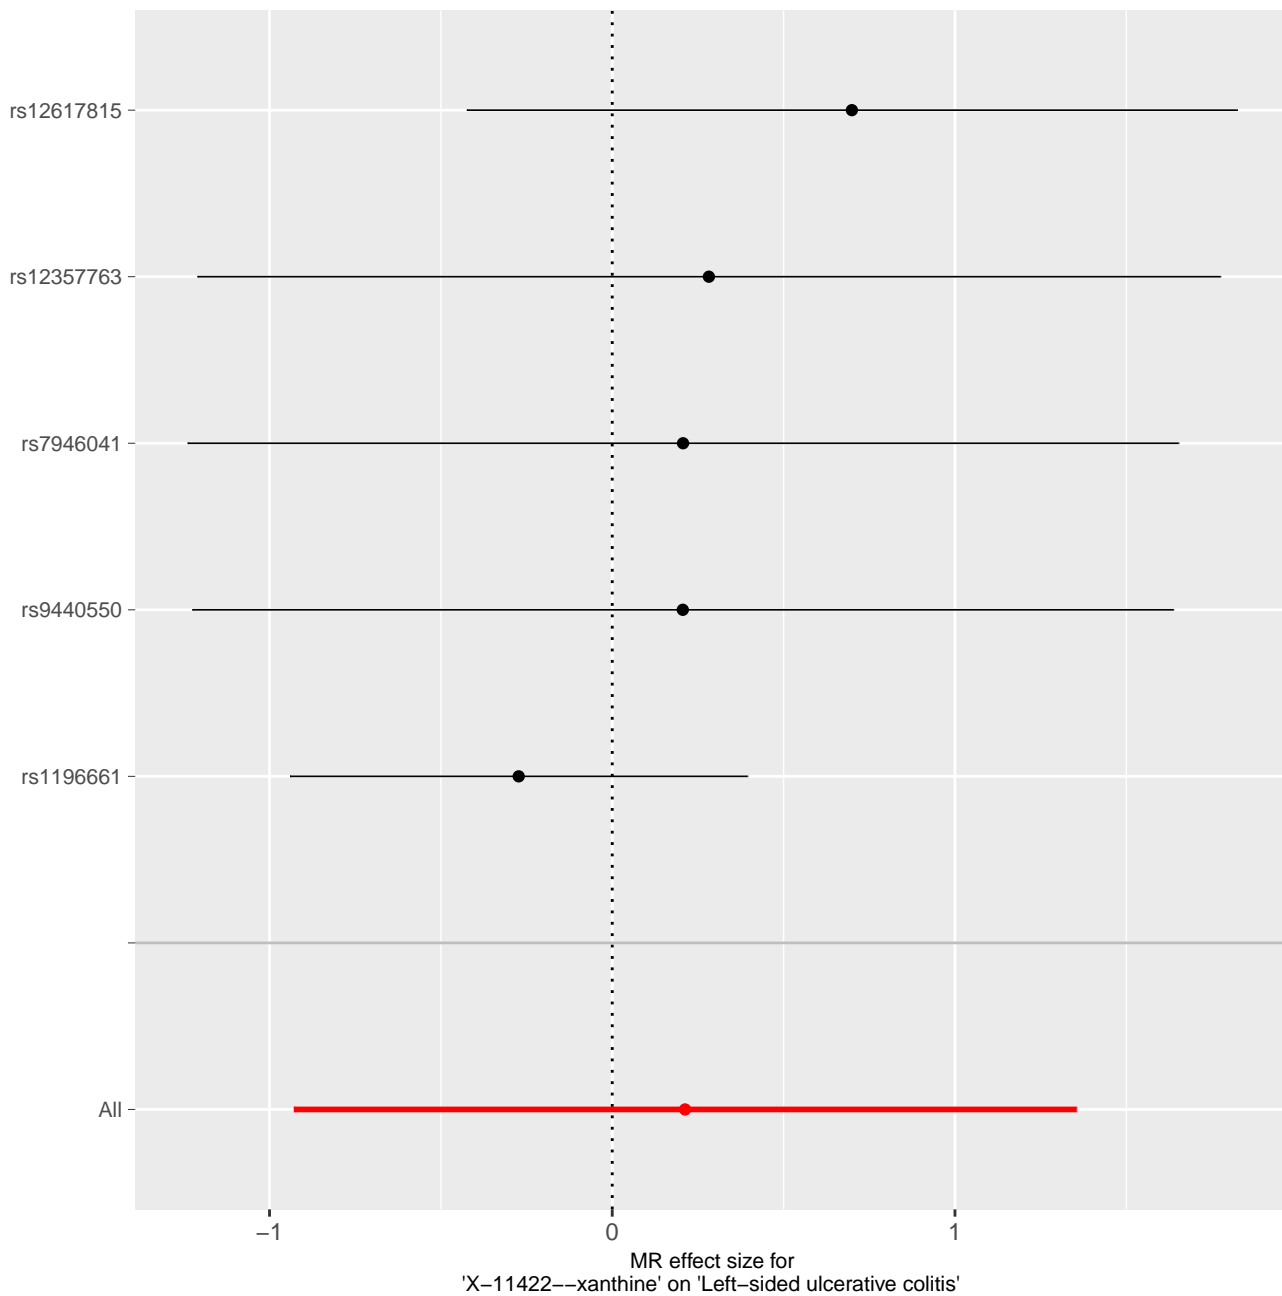

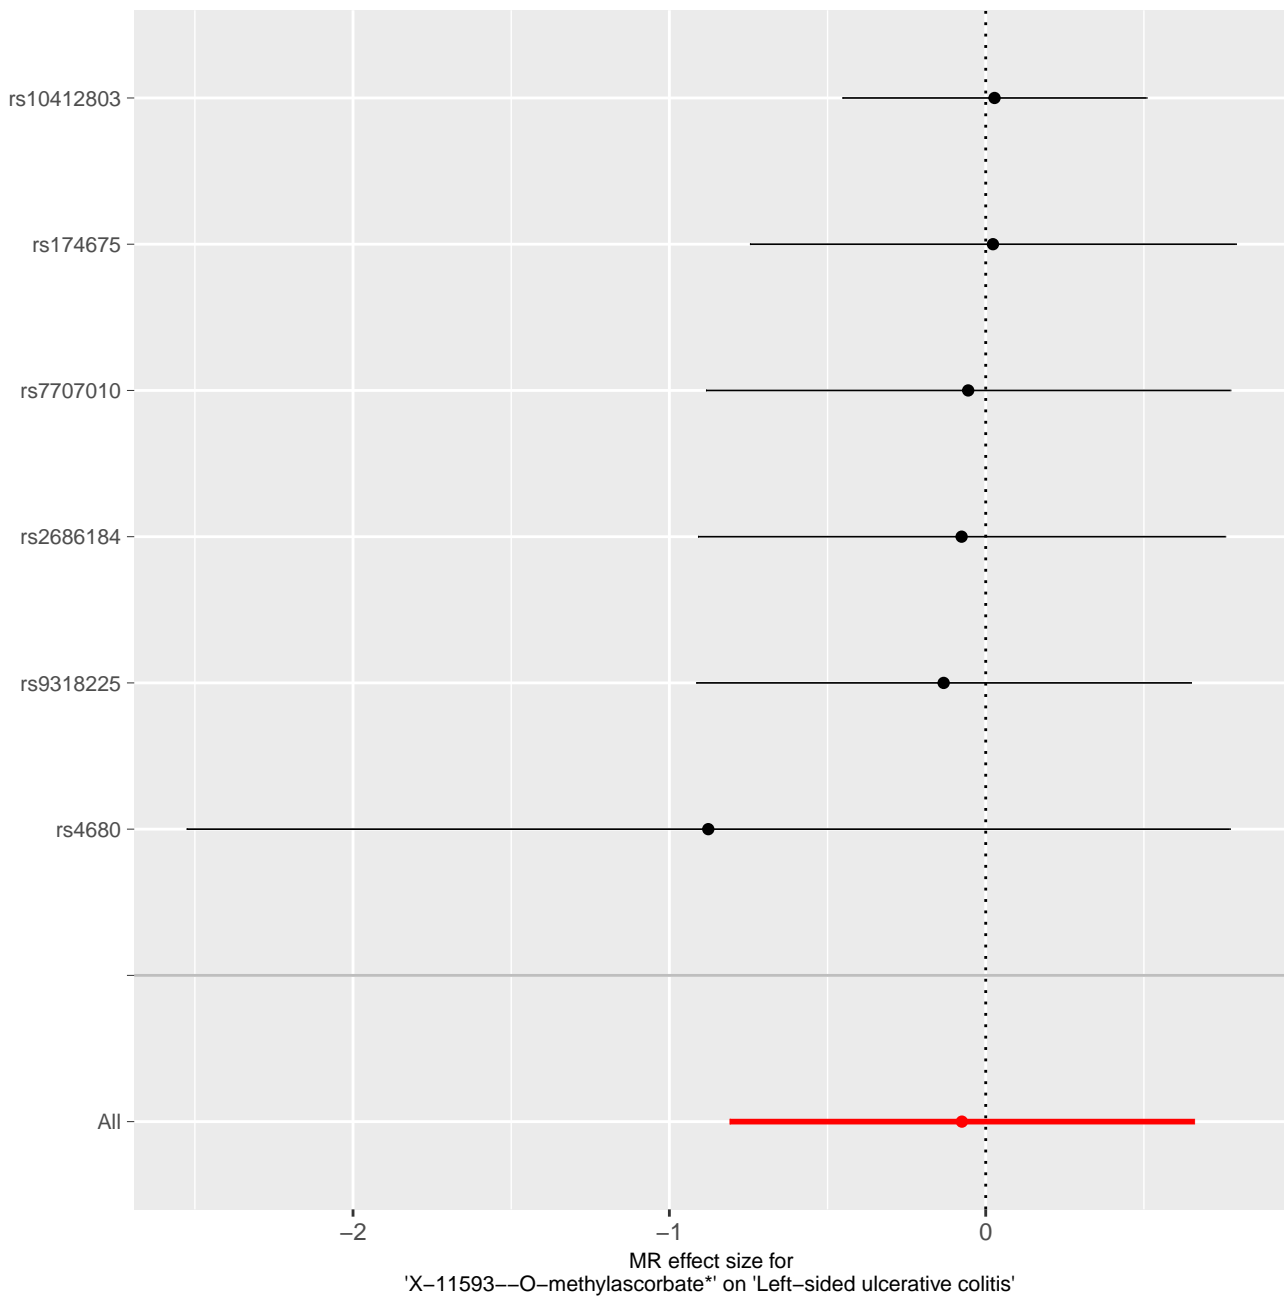

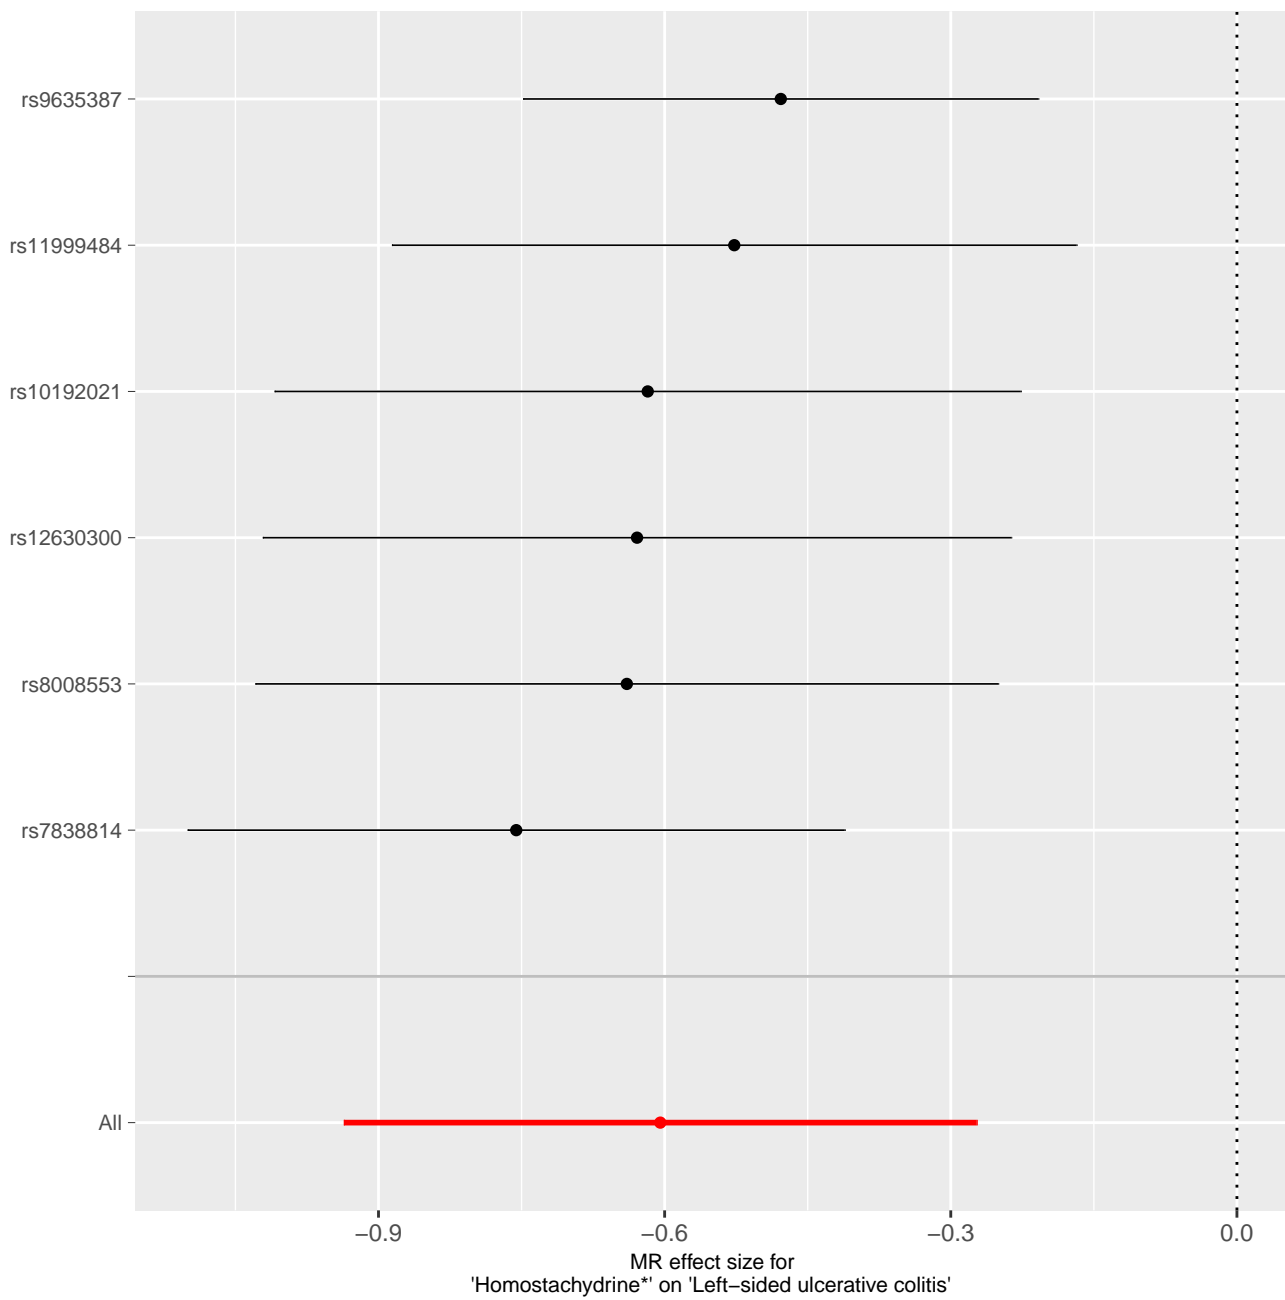

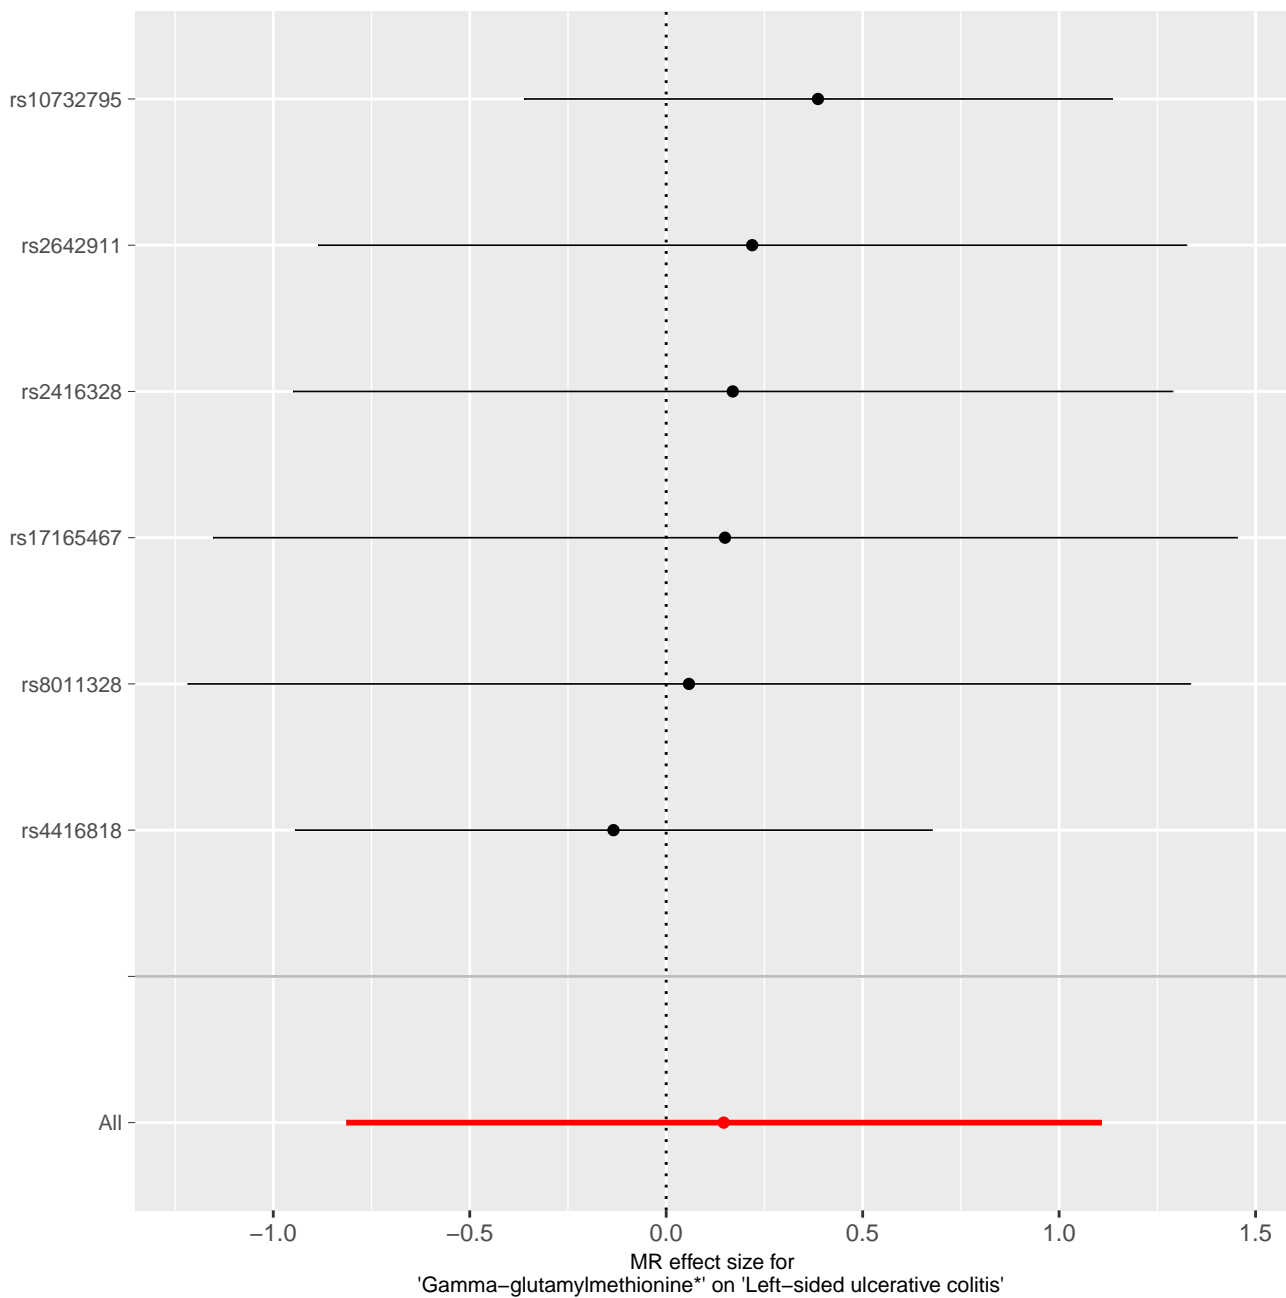

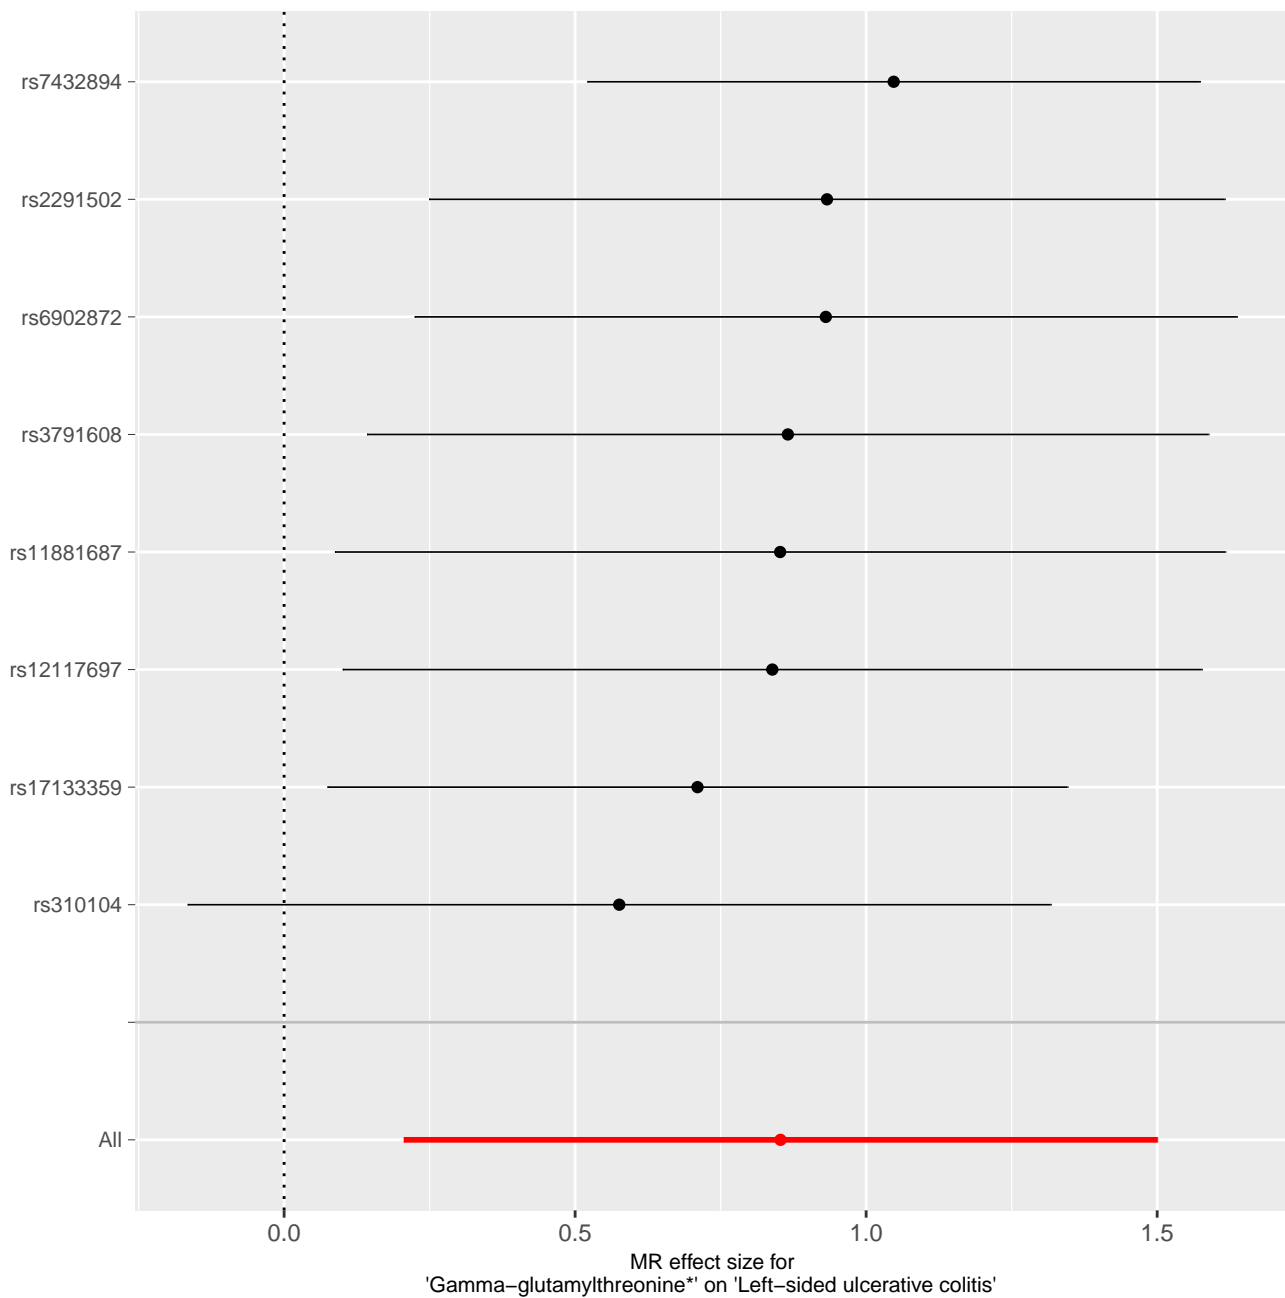

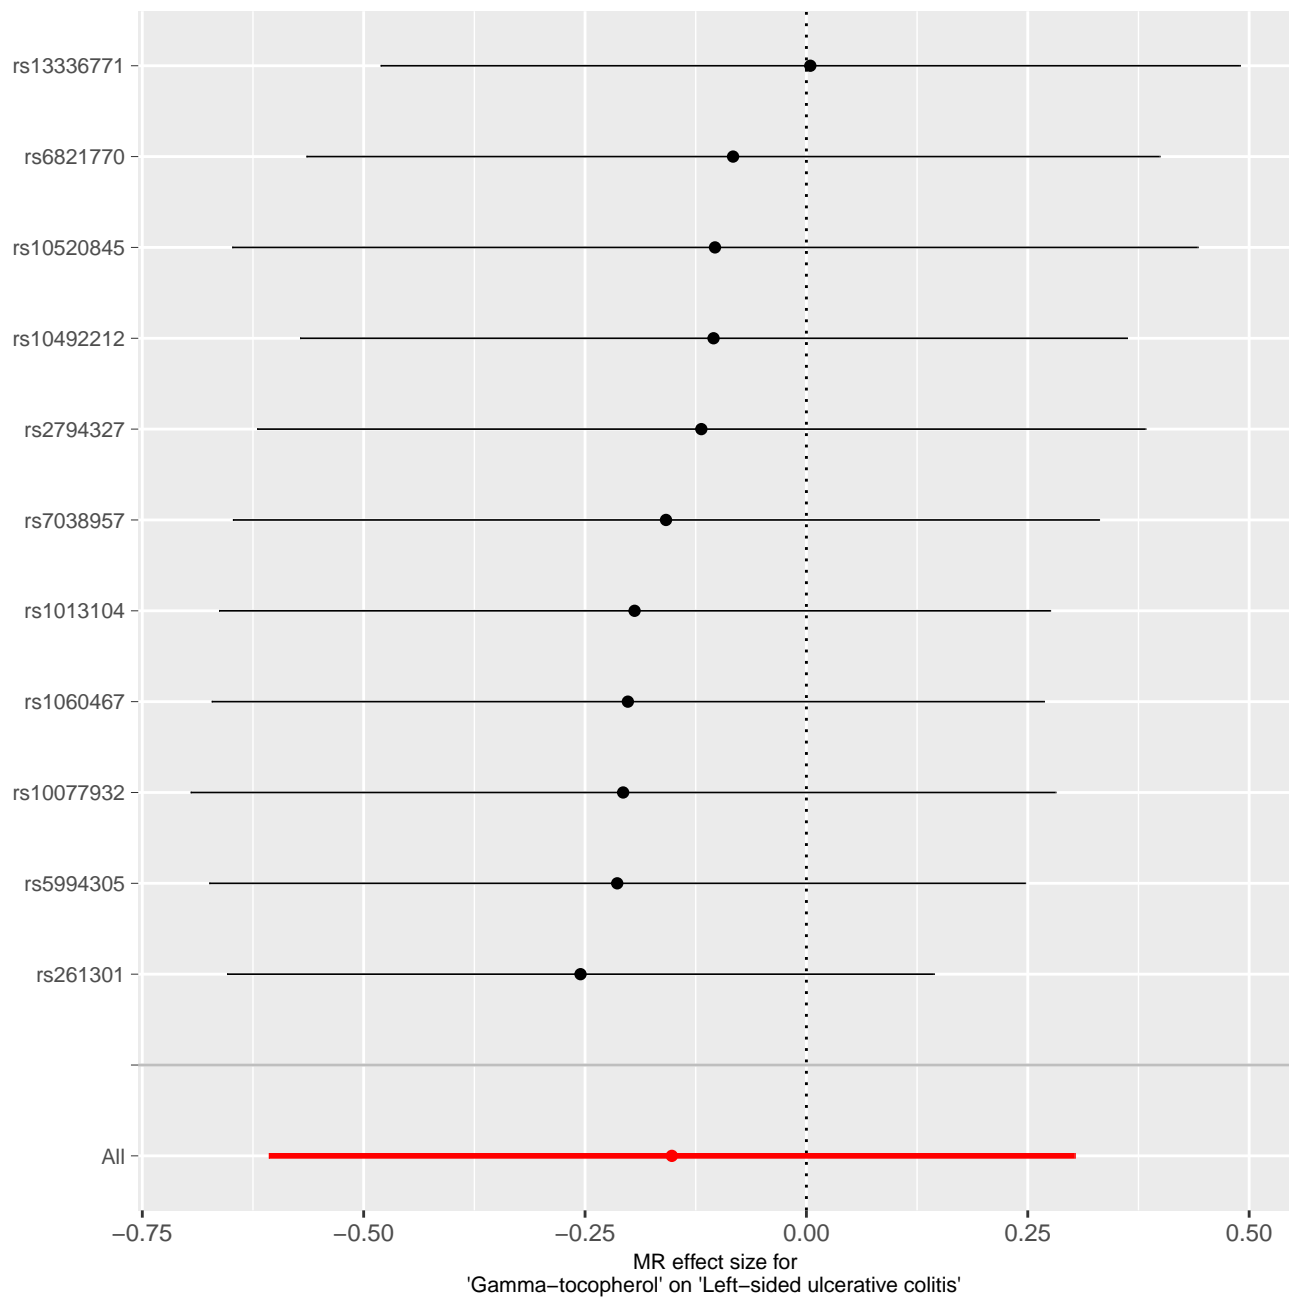

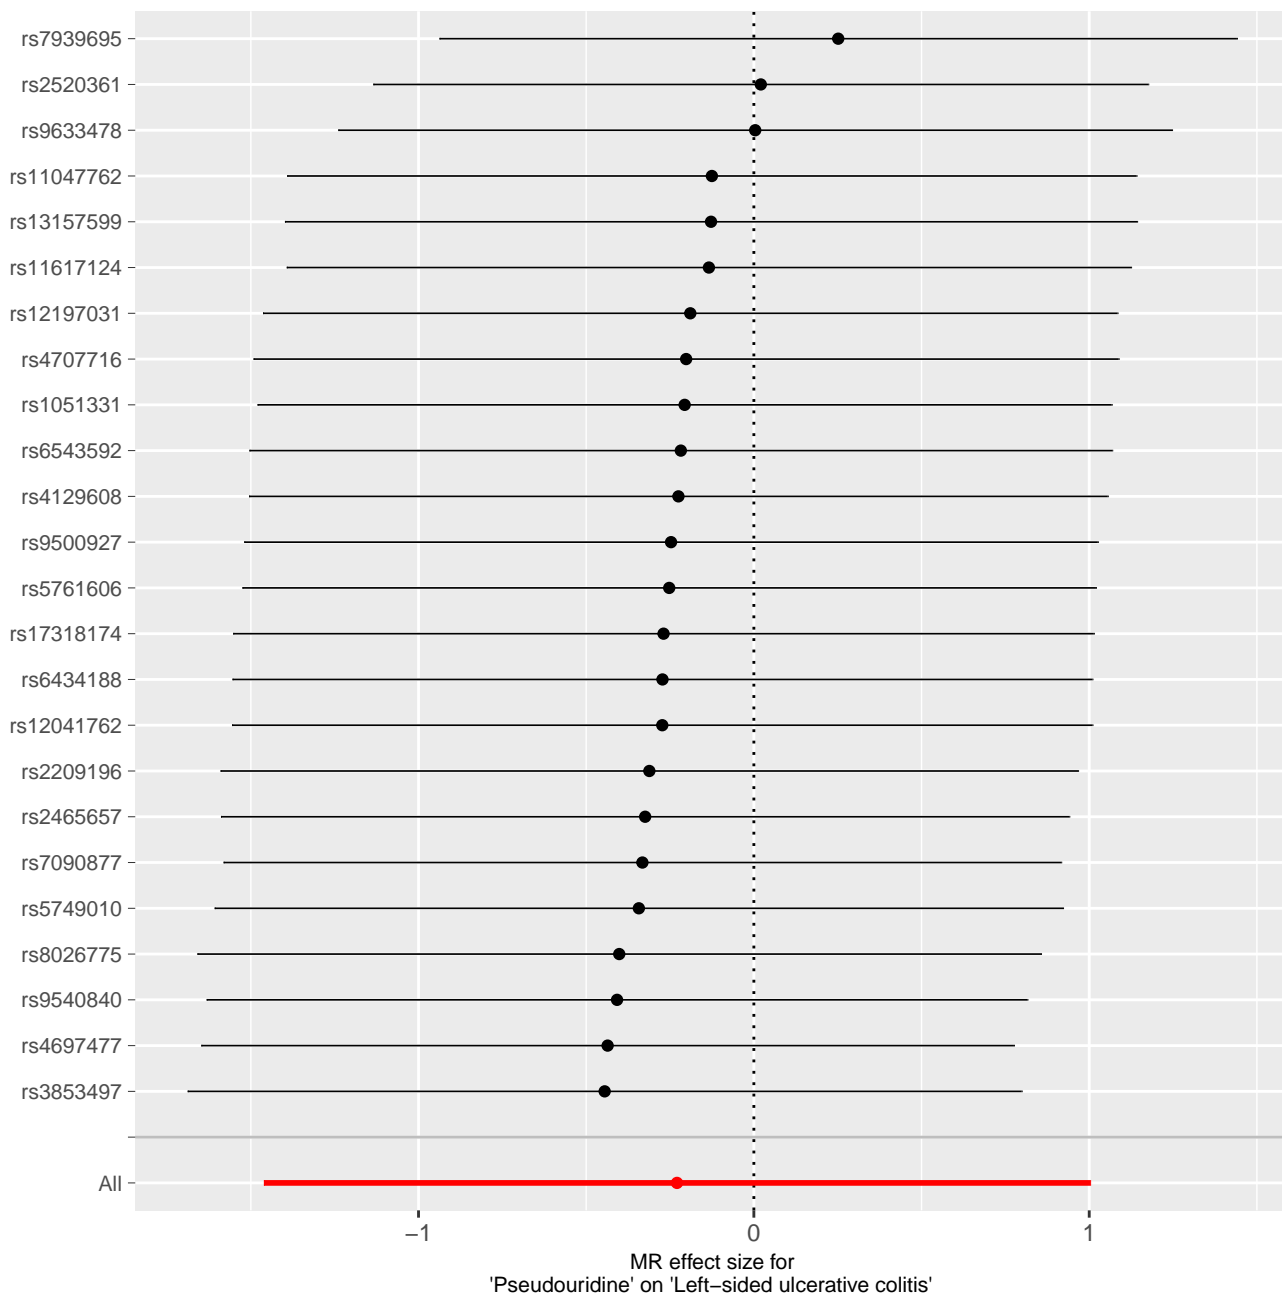

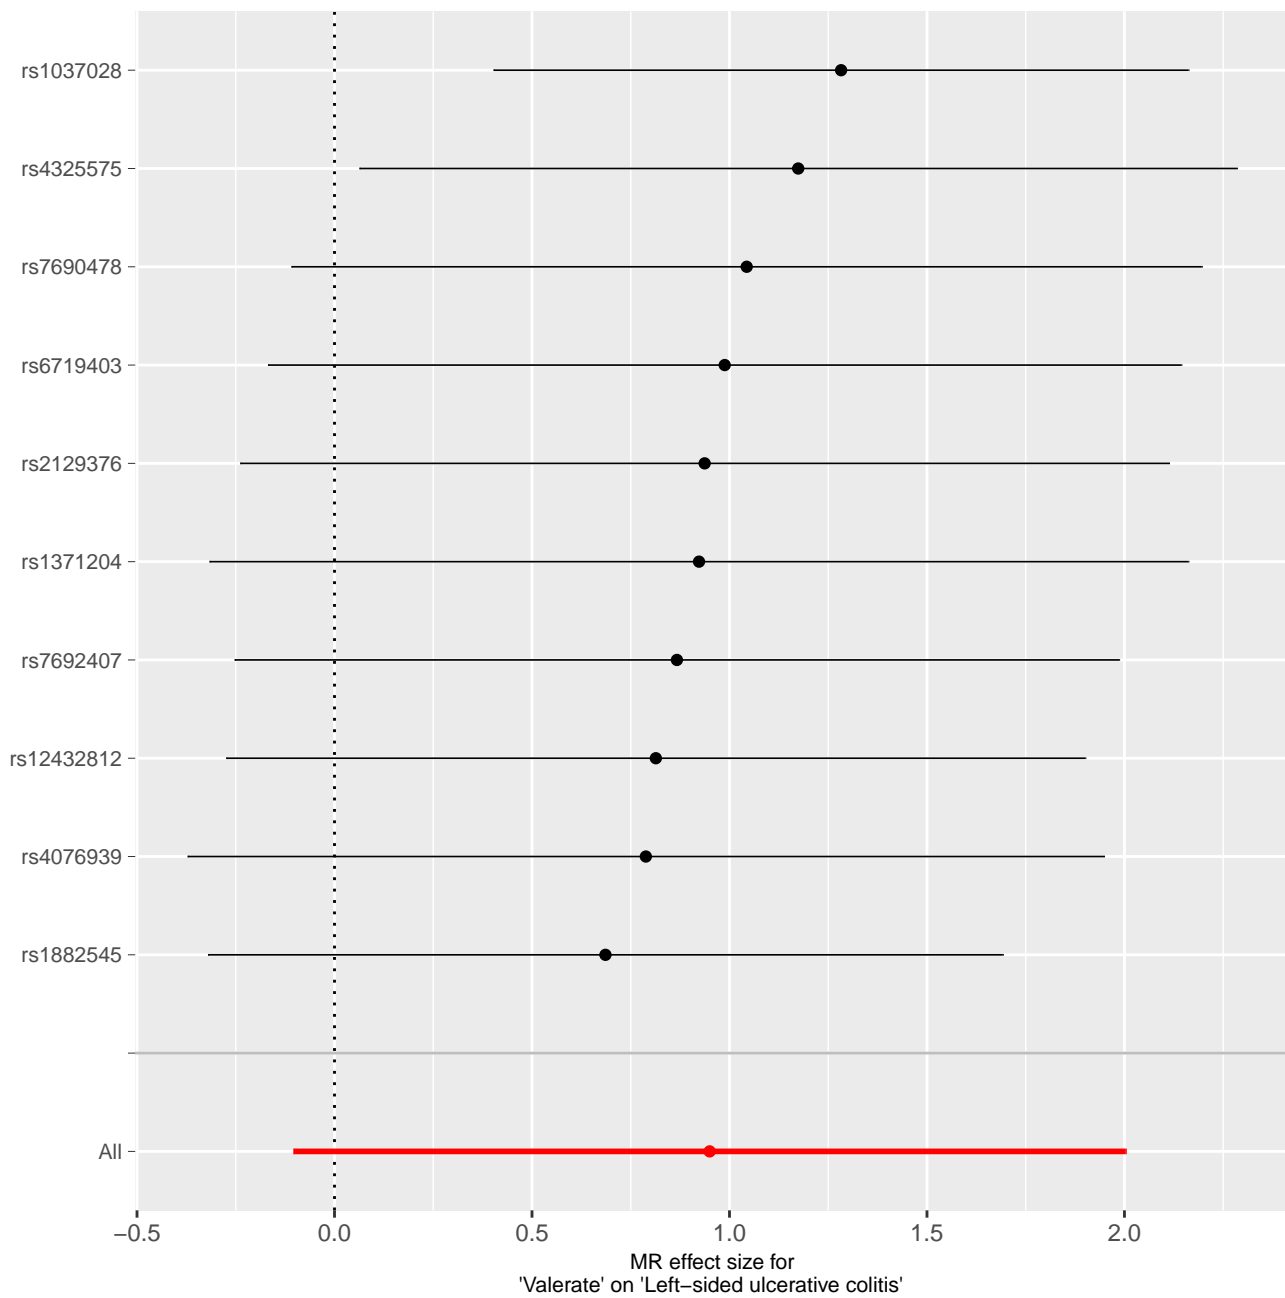



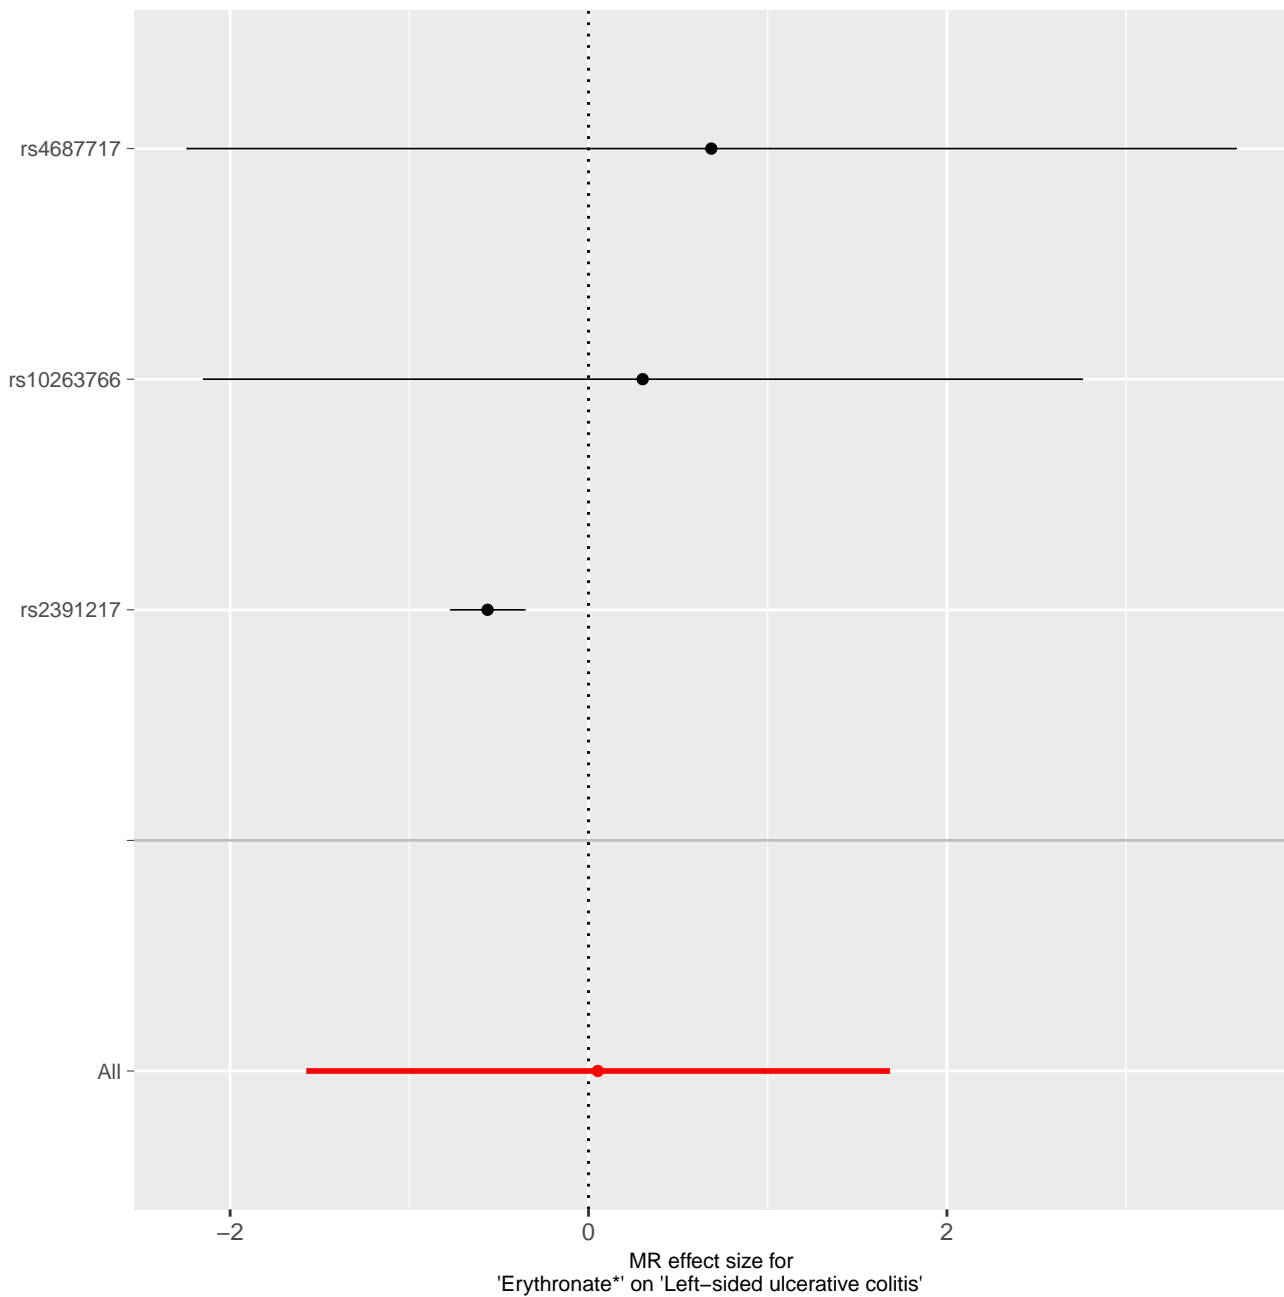

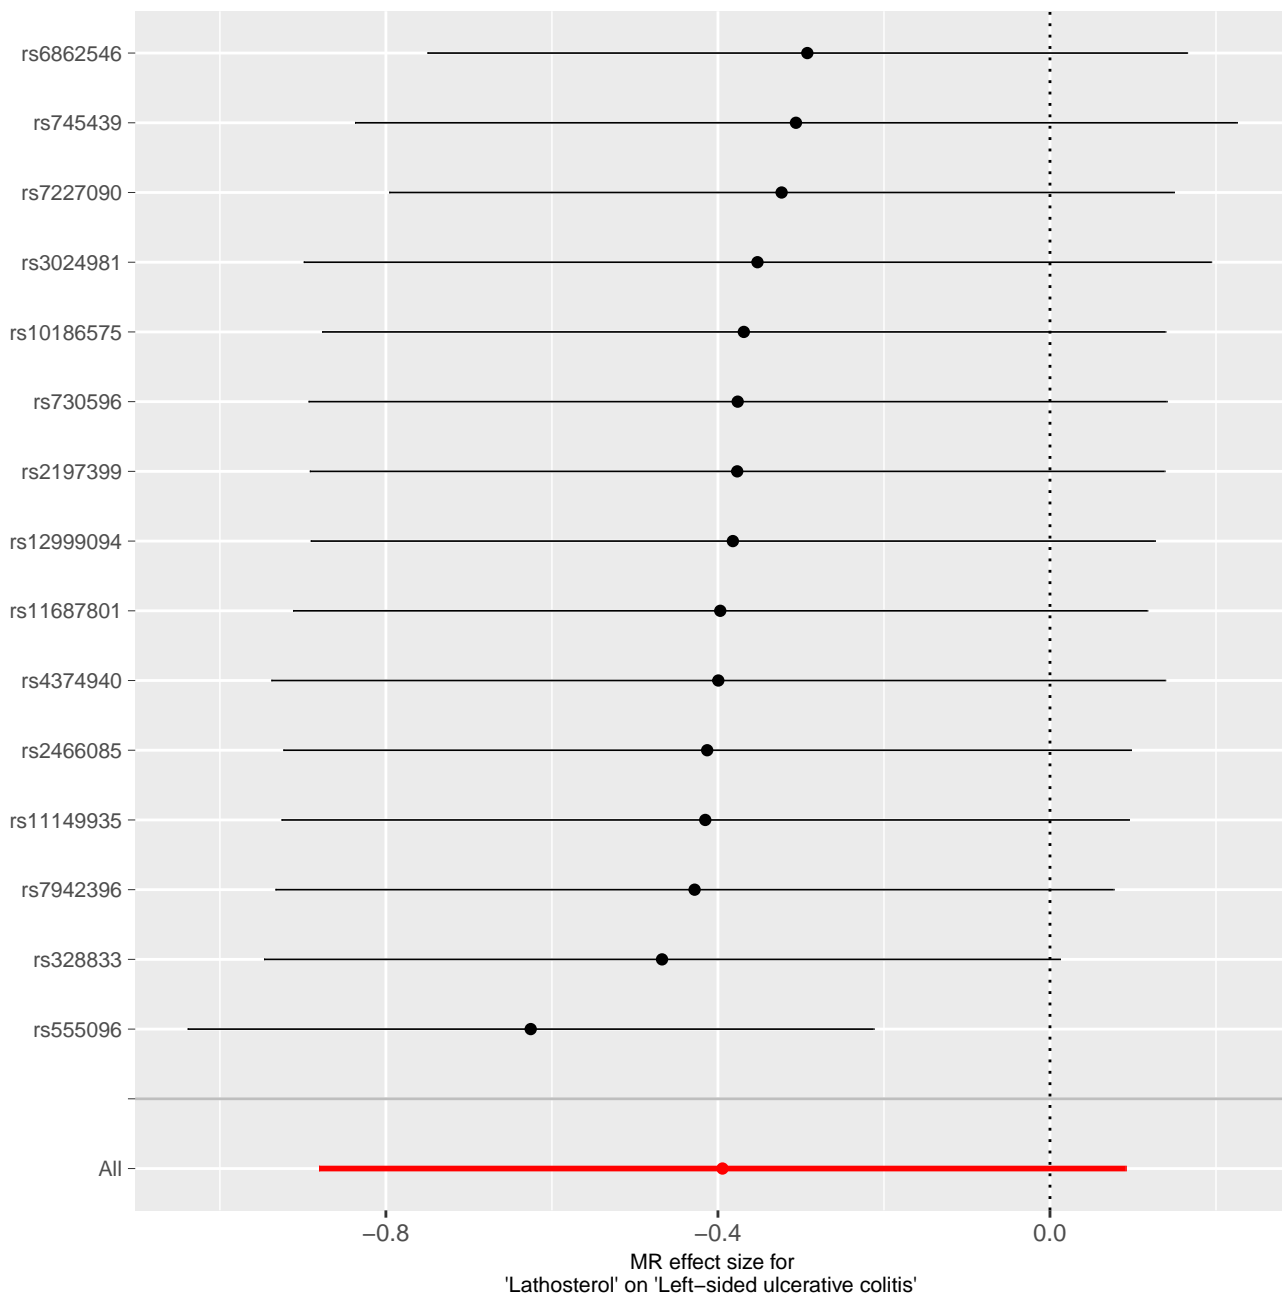

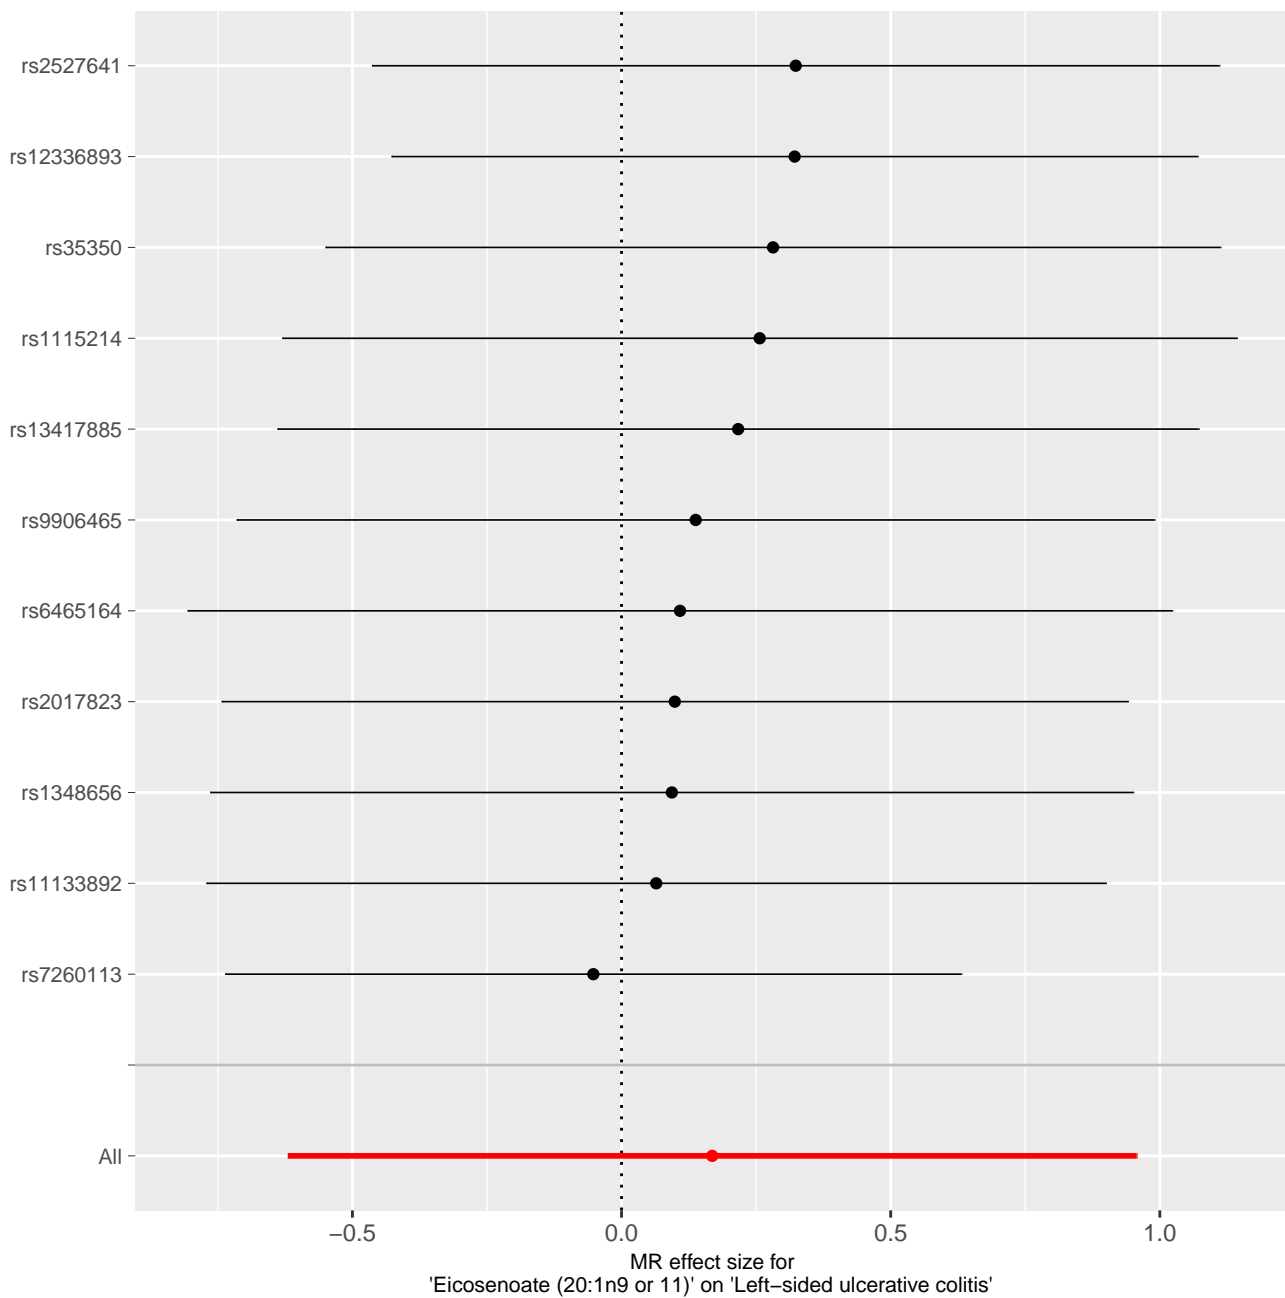

rs7775554

rs8002180

rs6804368

All

-2

-1

0

1

2

MR effect size for

'X-12244--N-acetylcarnosine' on 'Left-sided ulcerative colitis'

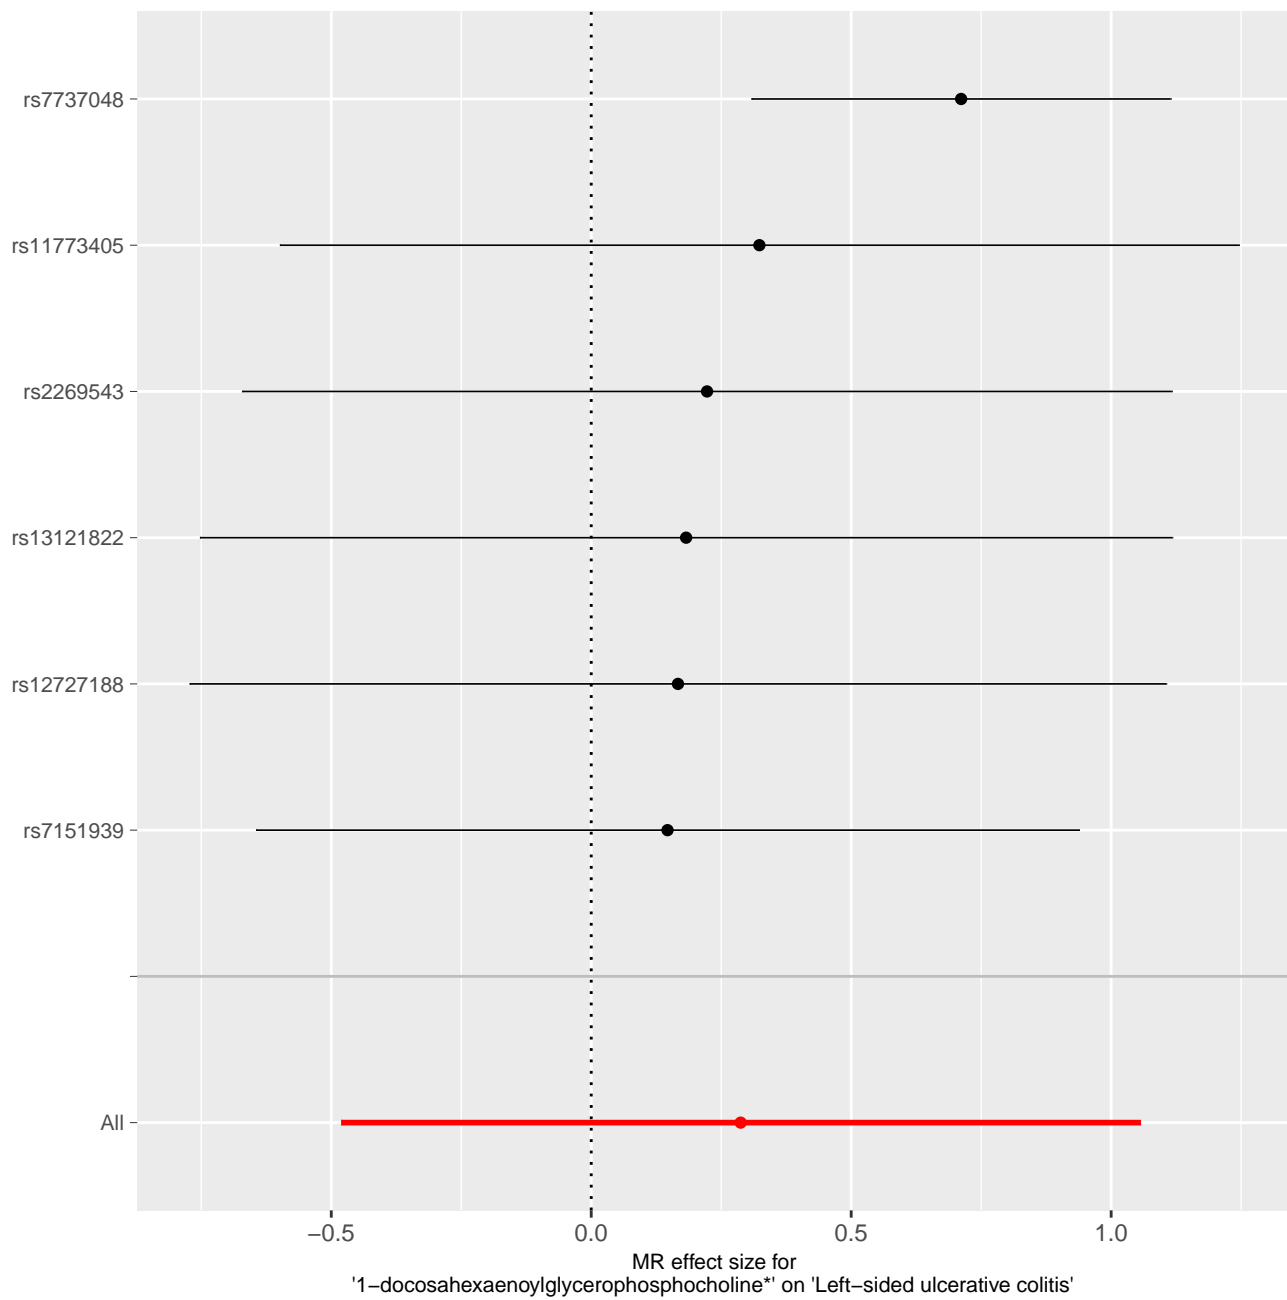

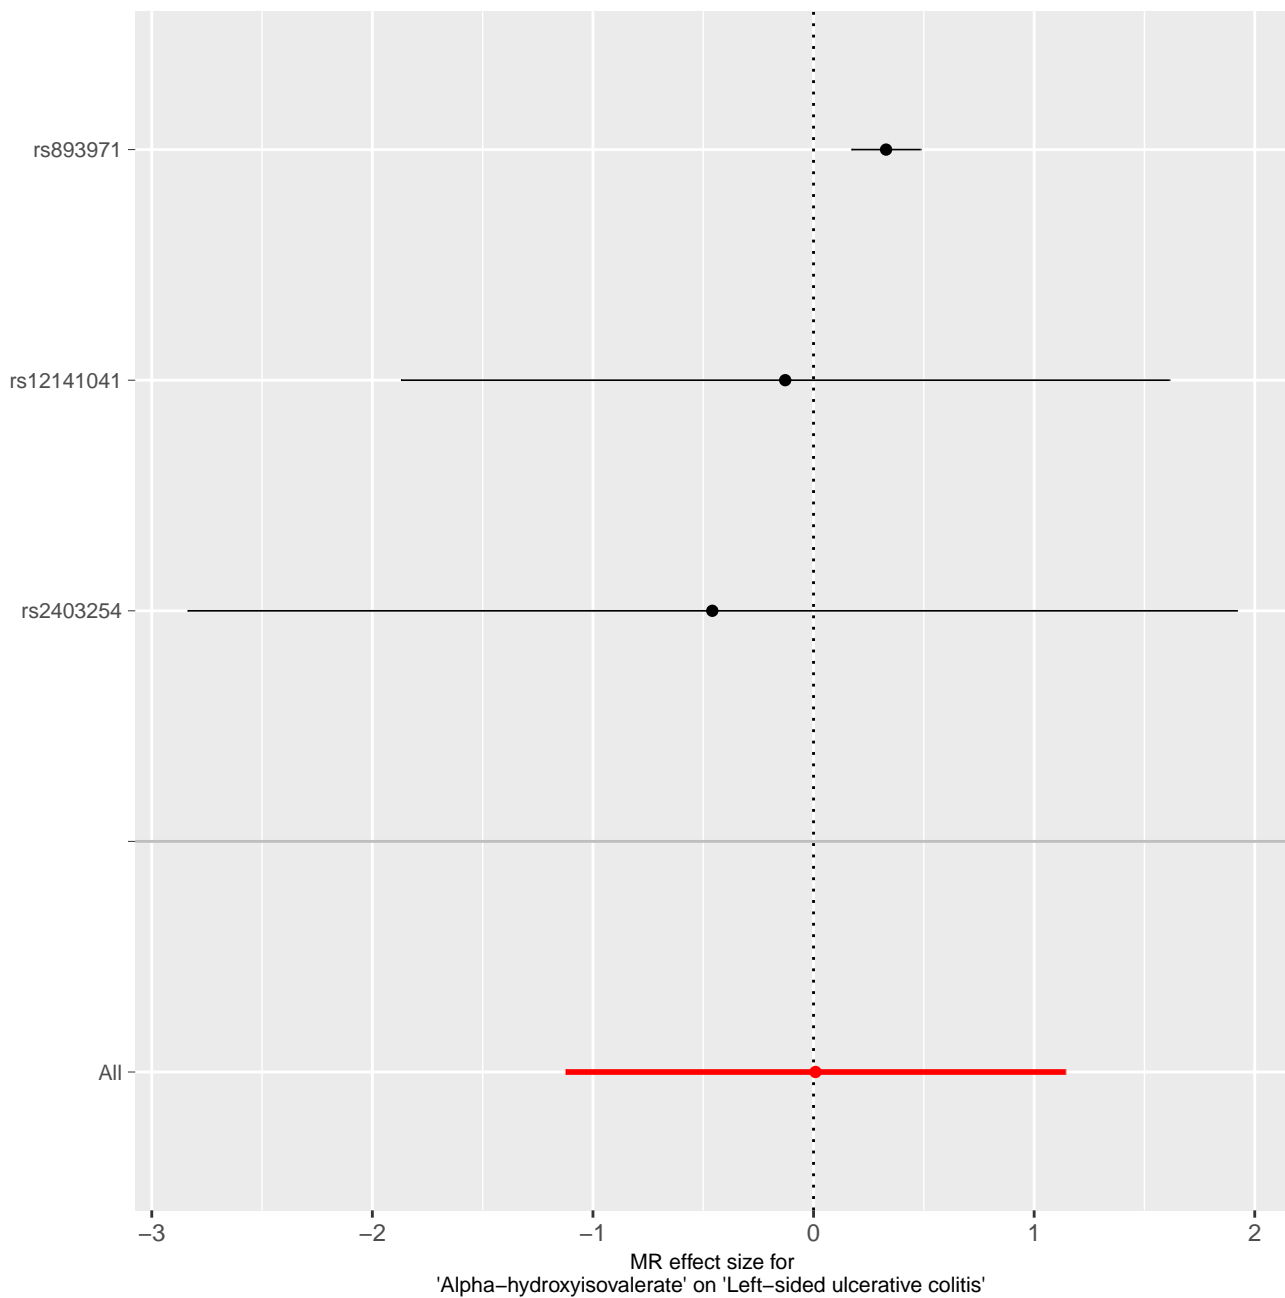

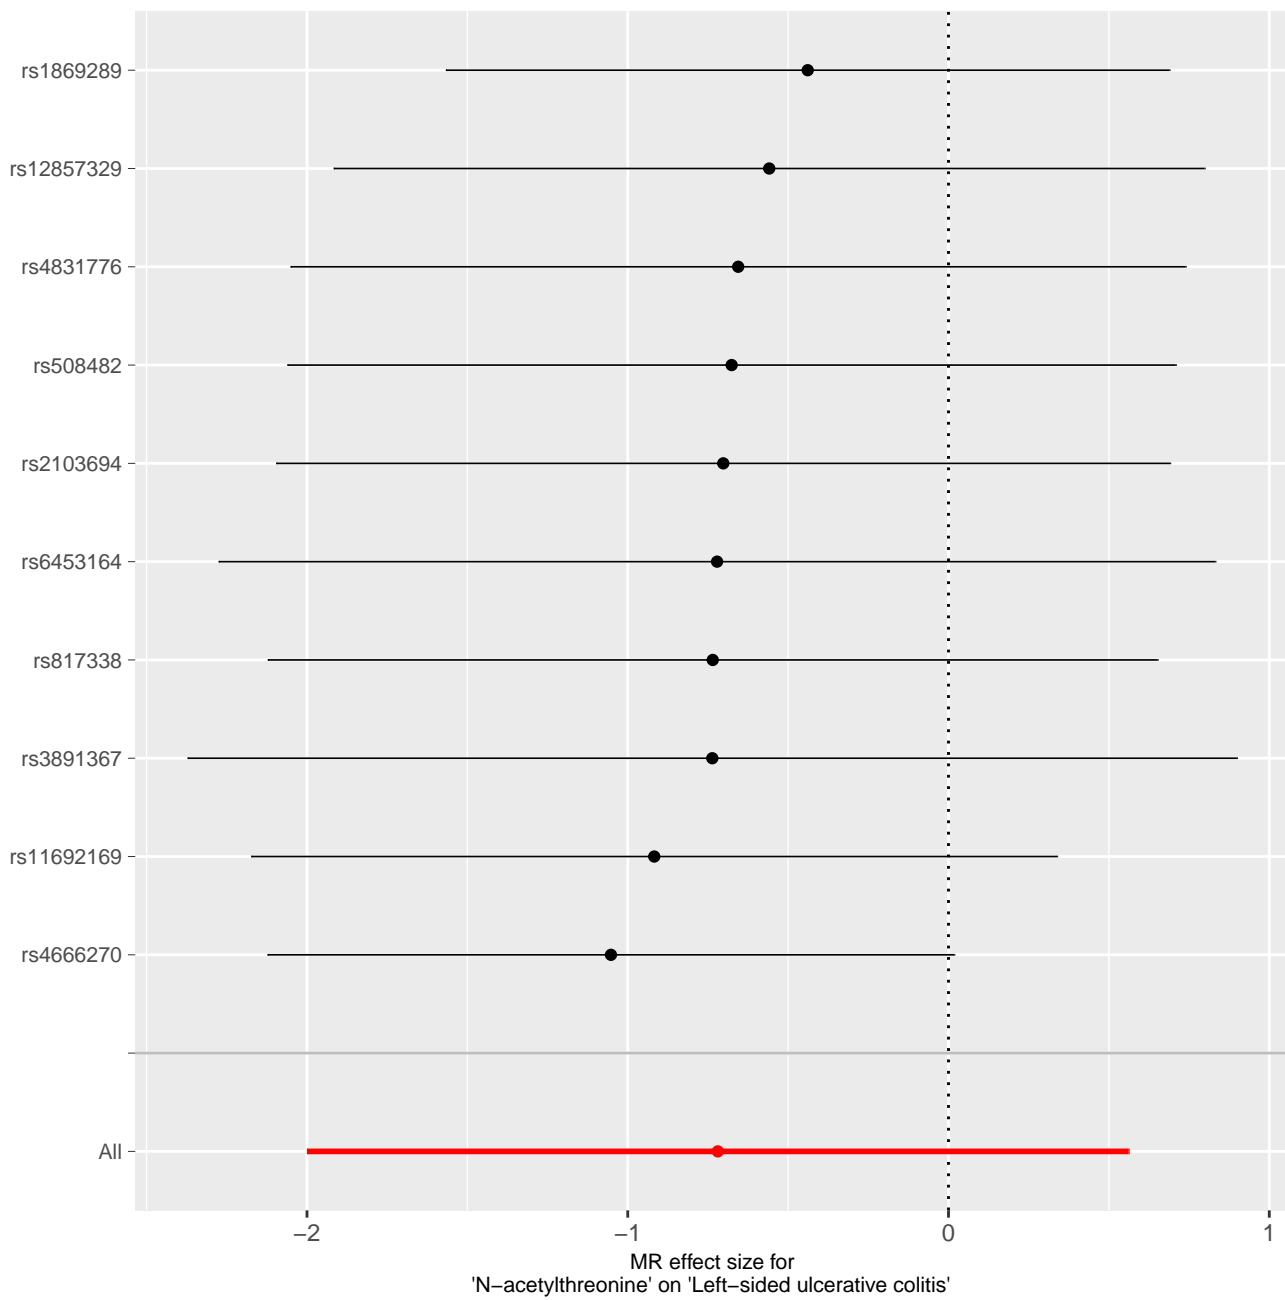

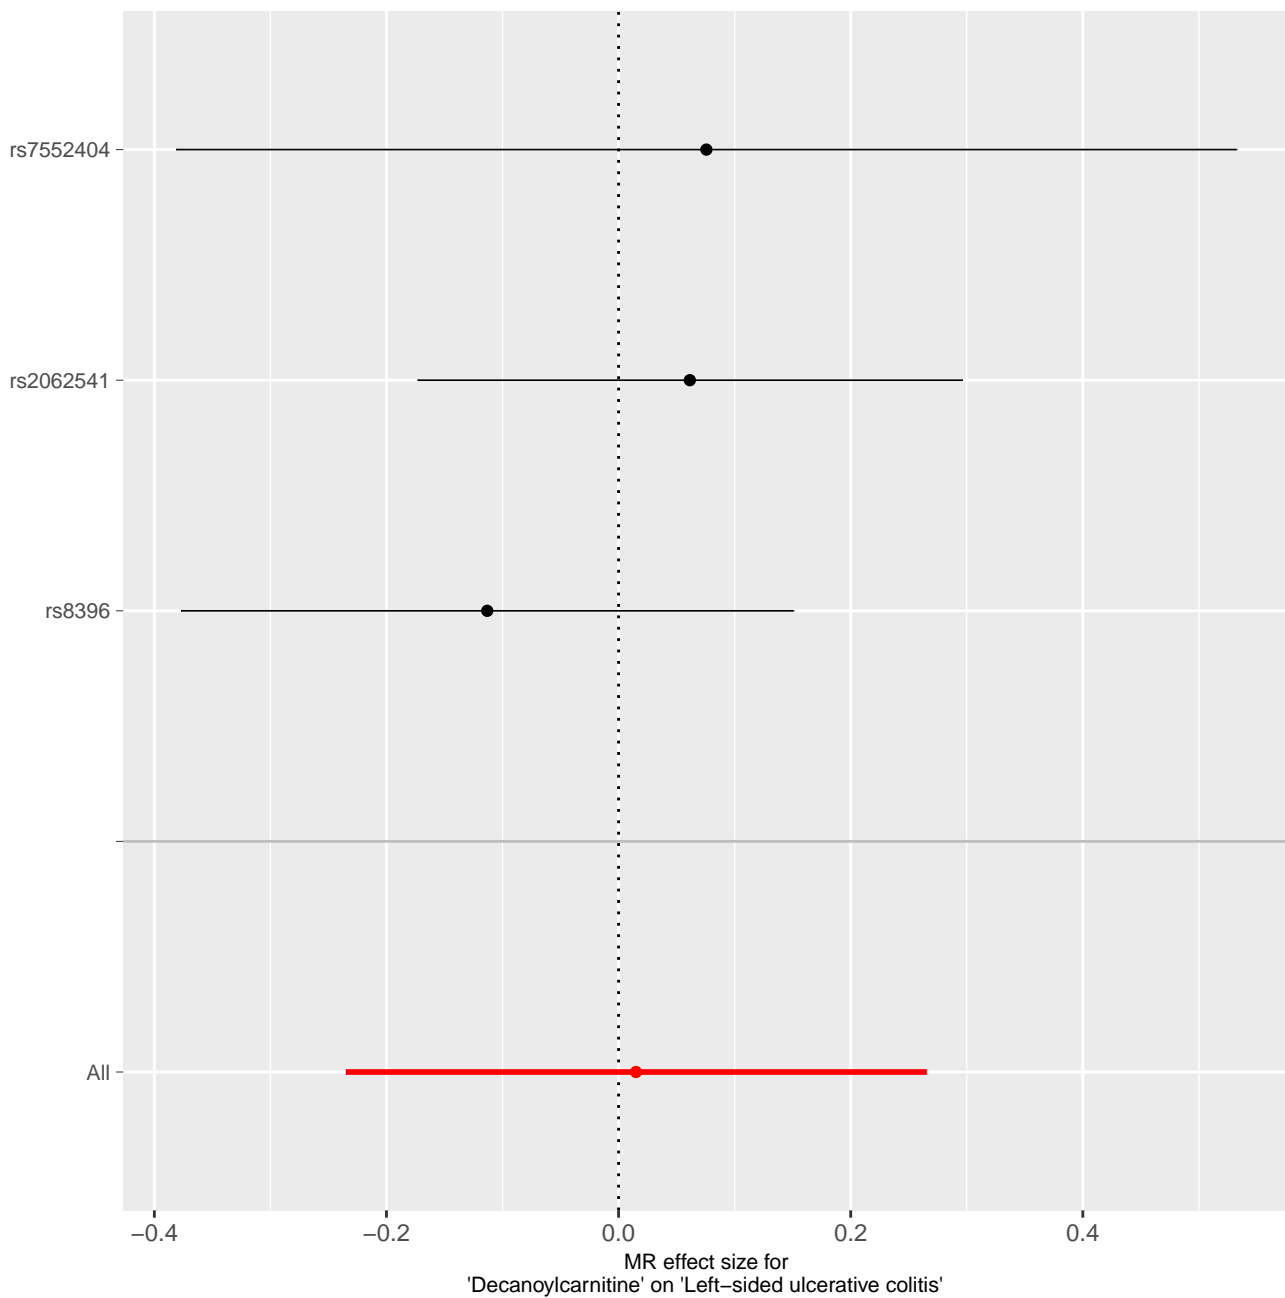



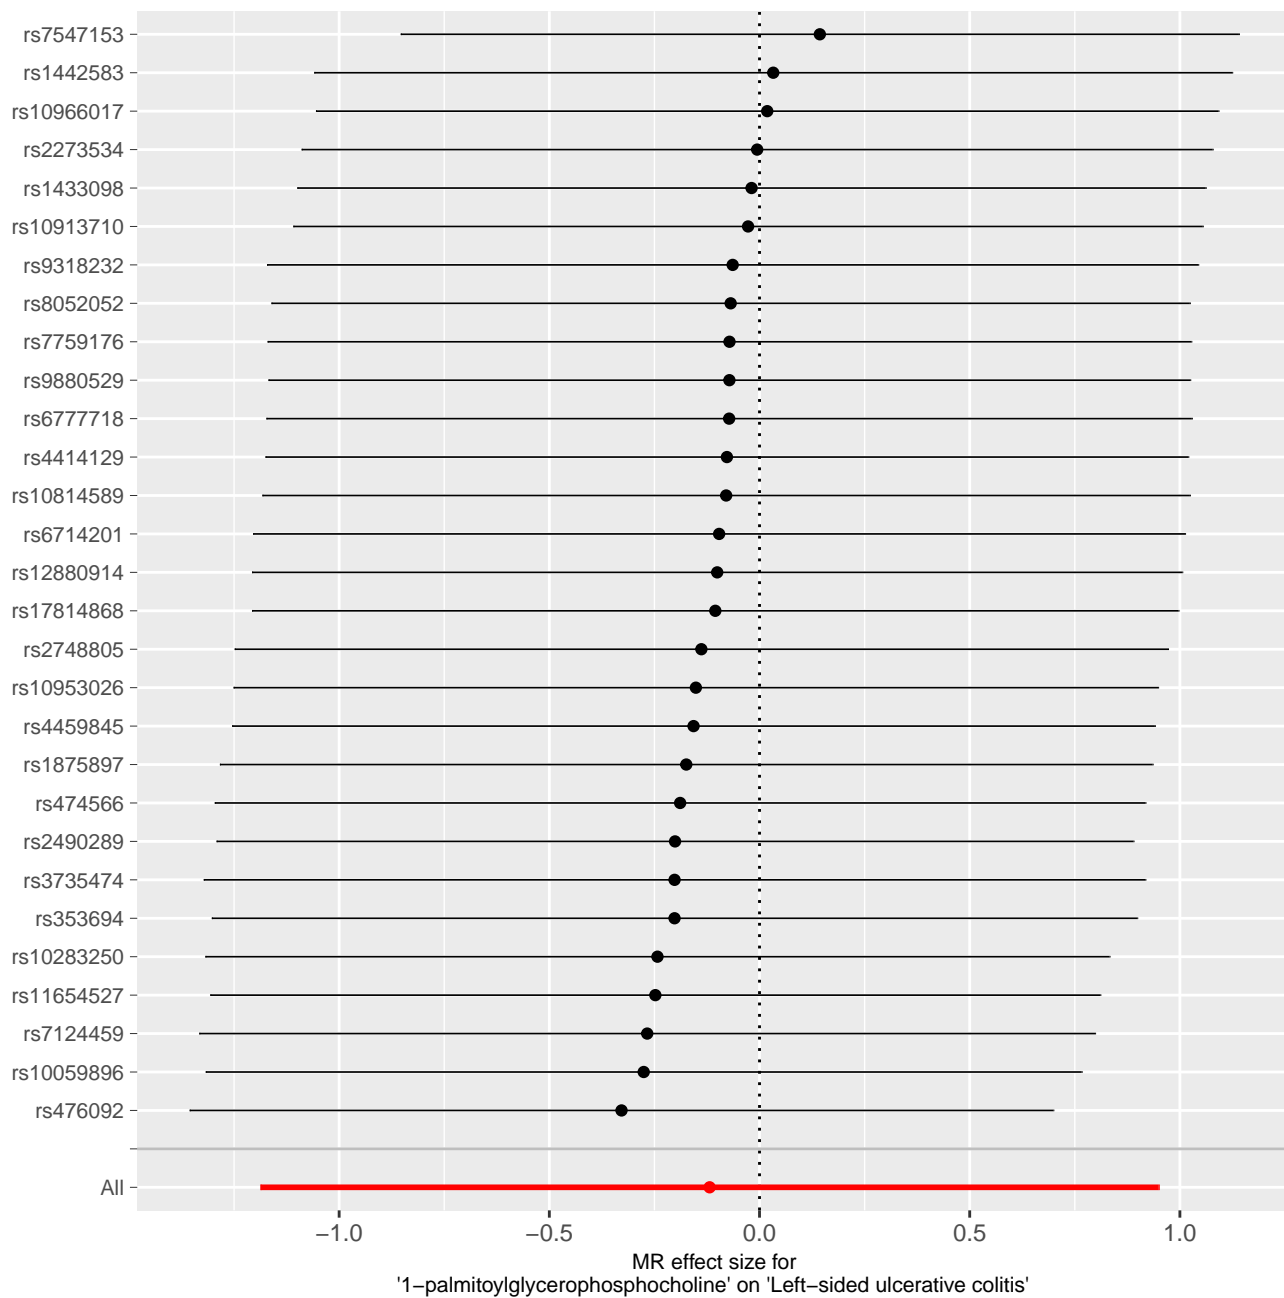

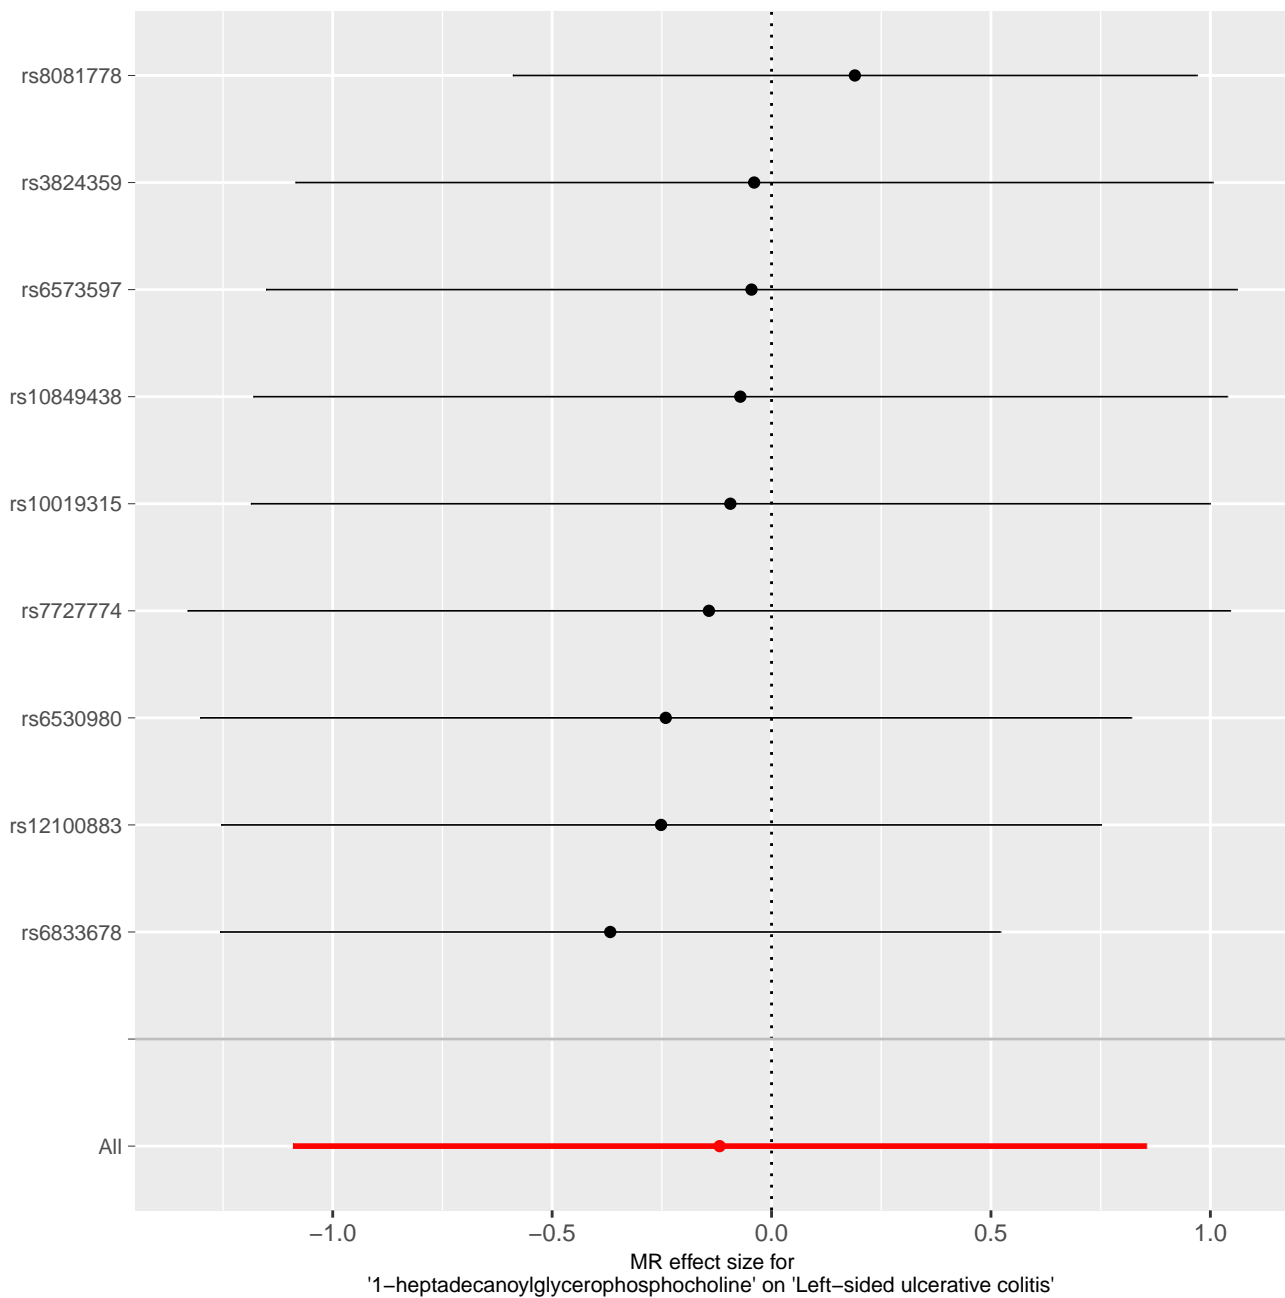

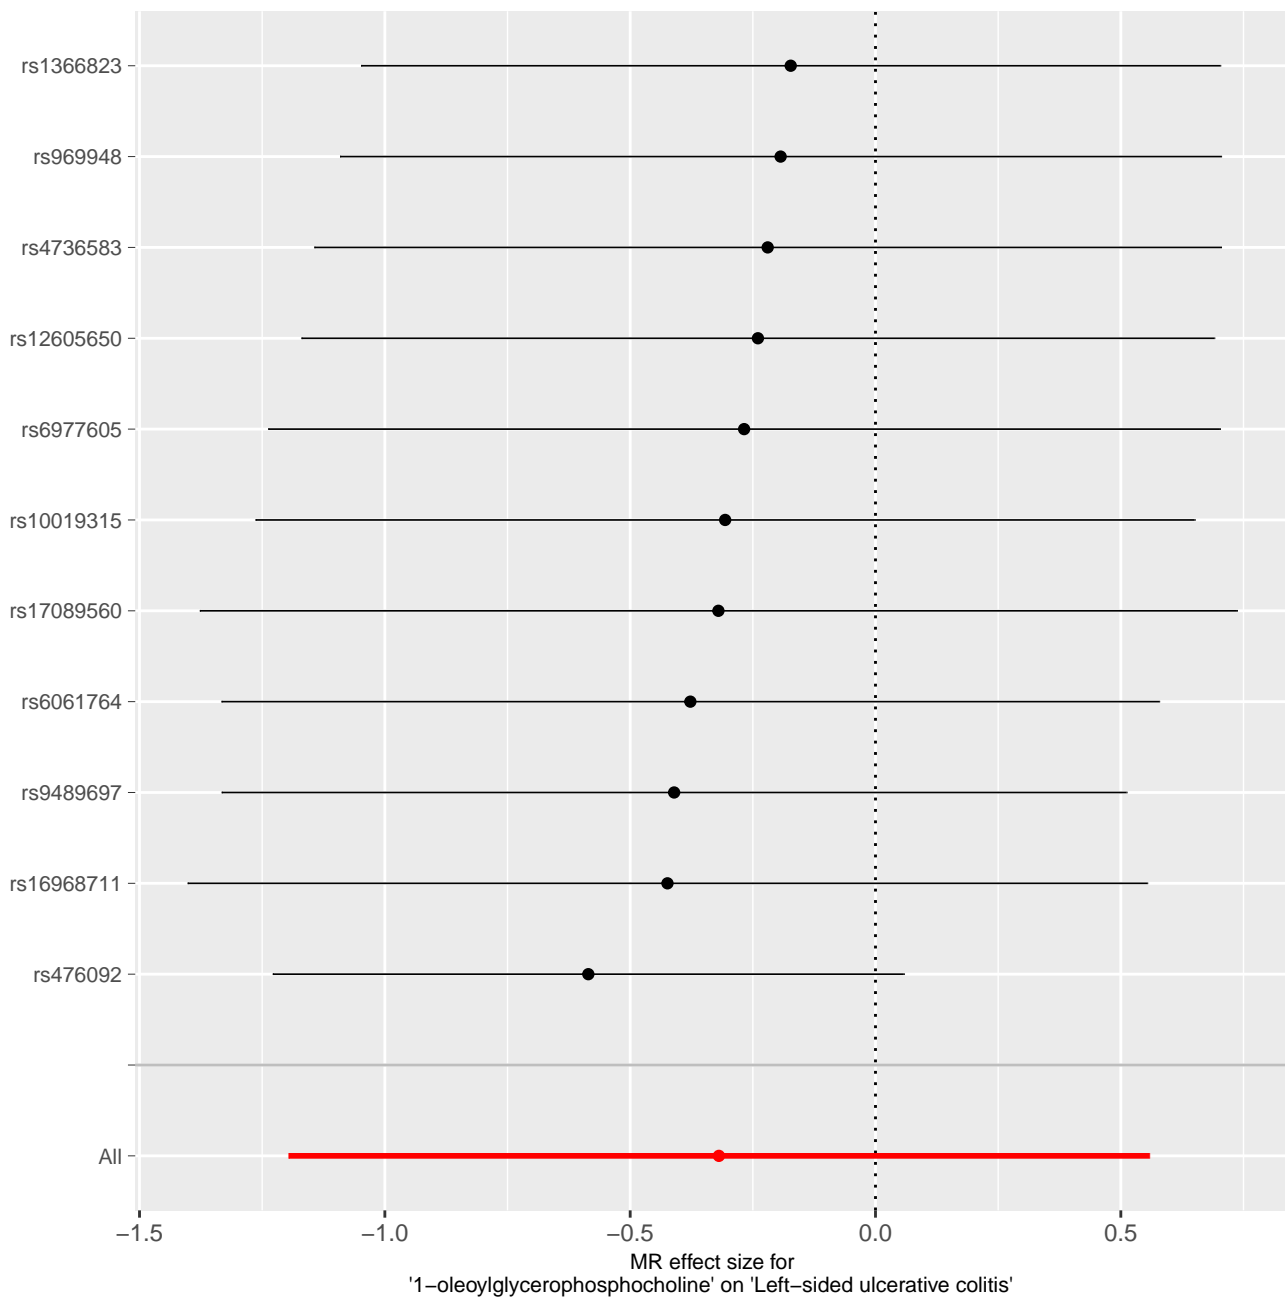

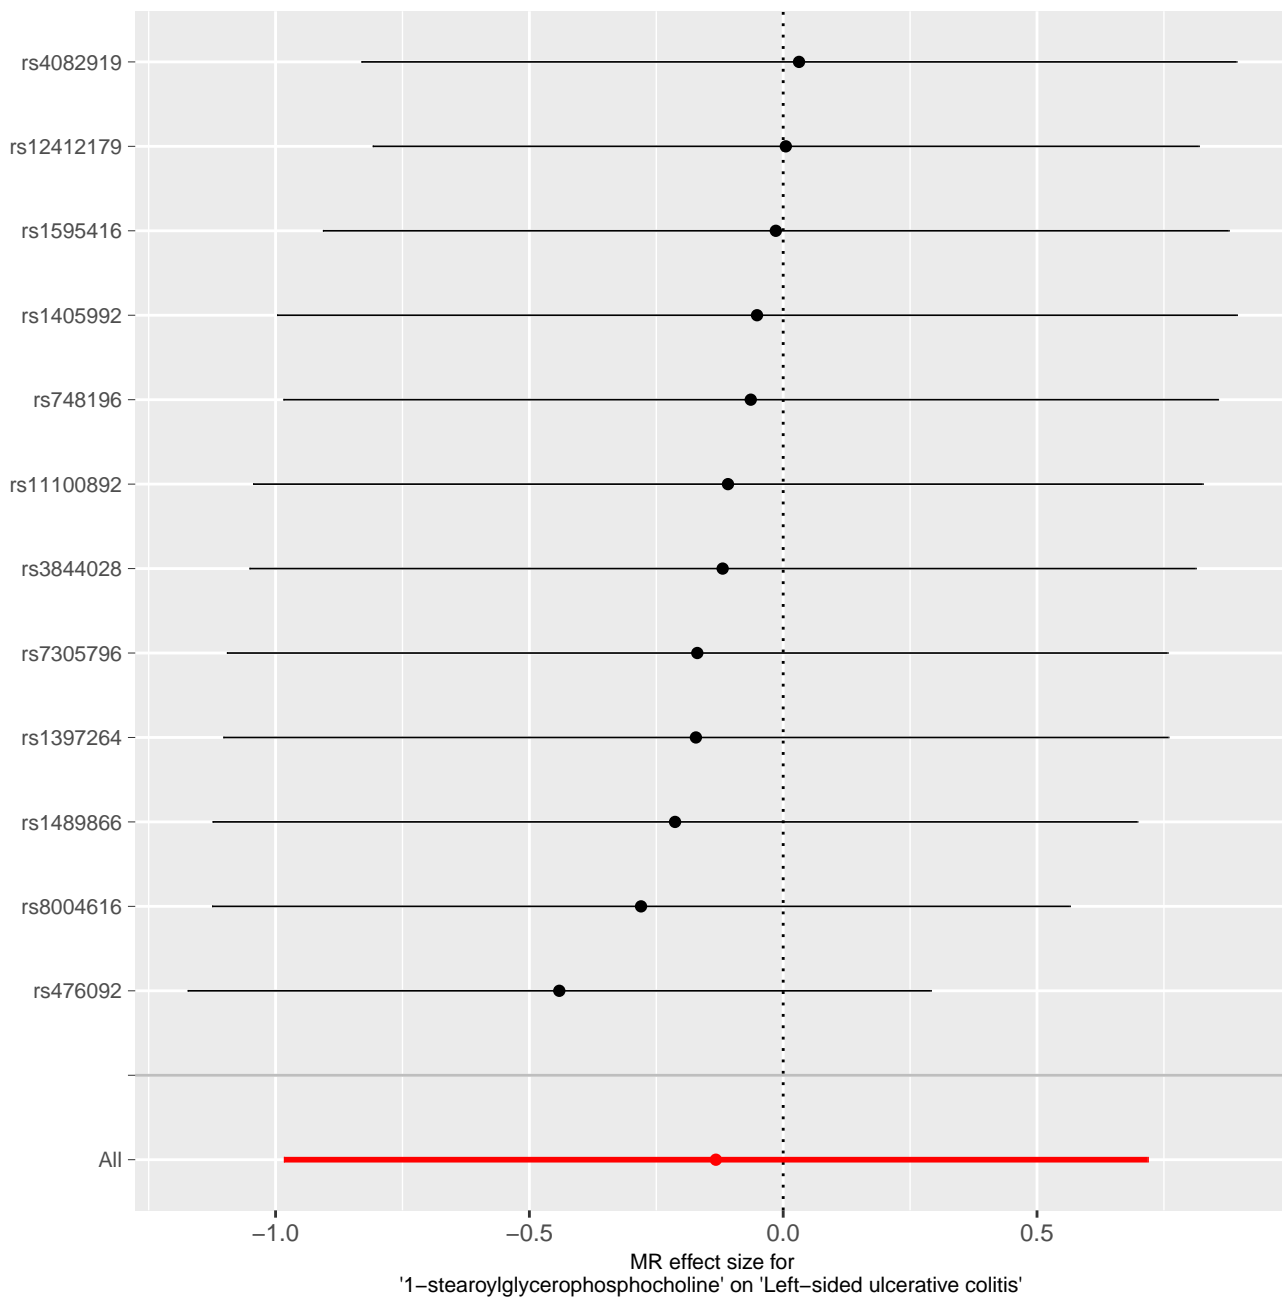

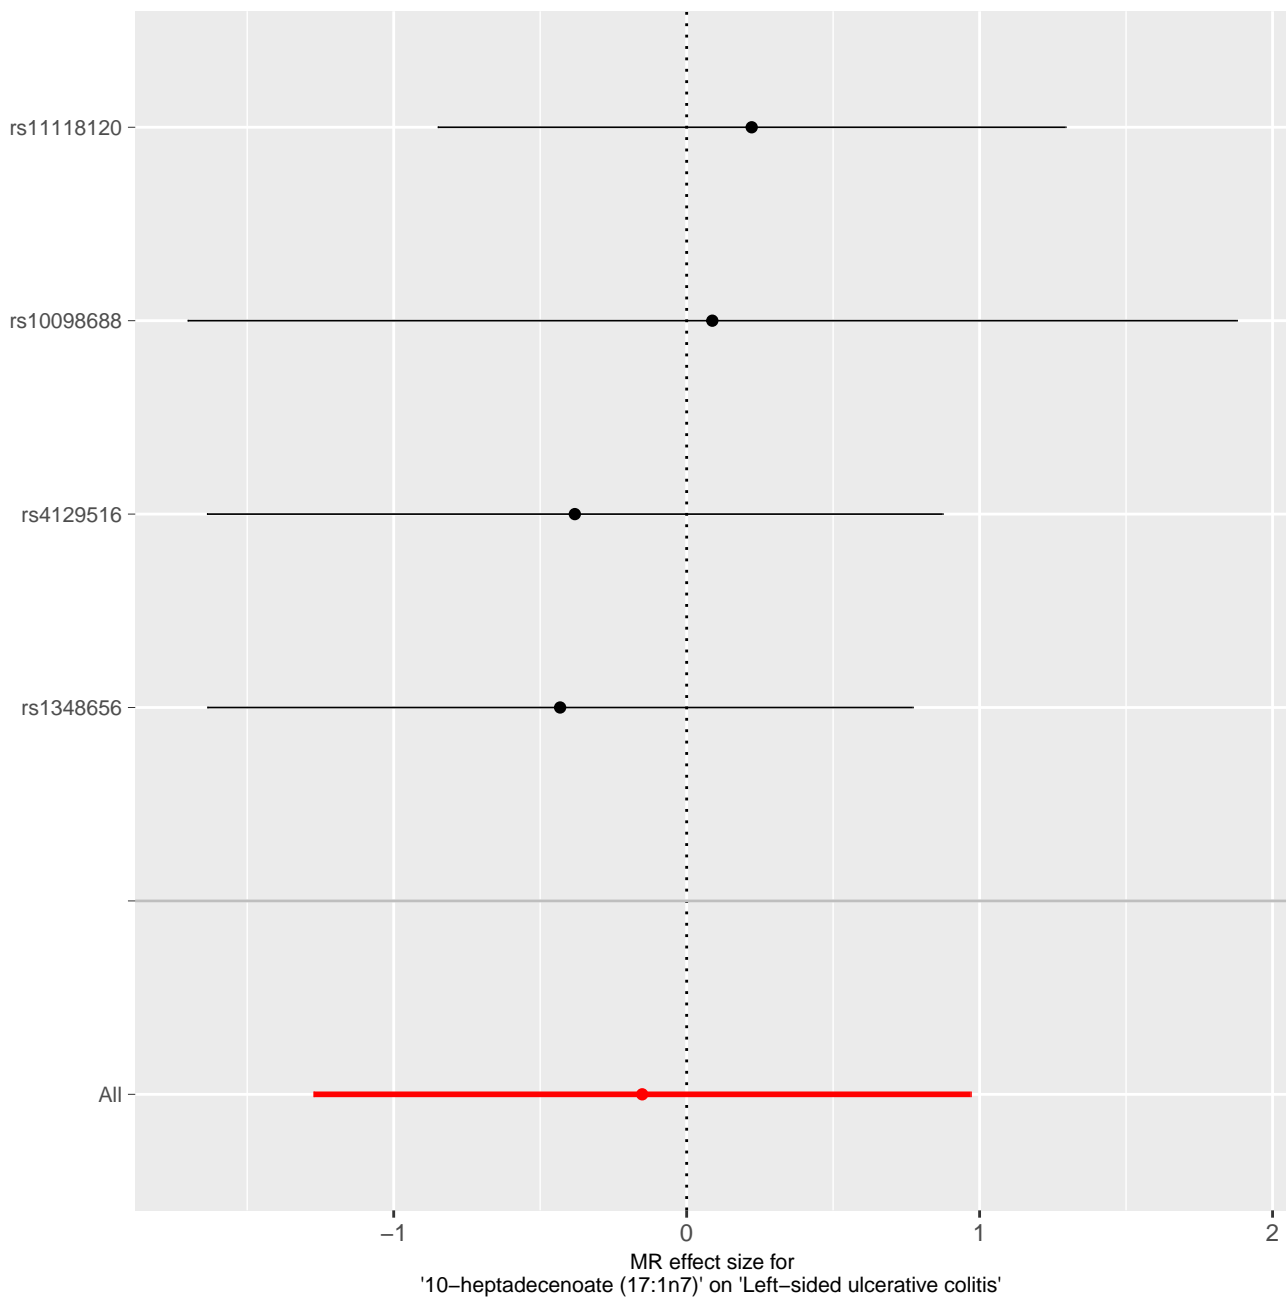

Batch 1581 : Linolenate [alpha or gamma; (18:3n3 or 6)] on Left-sided ulcerative colitis

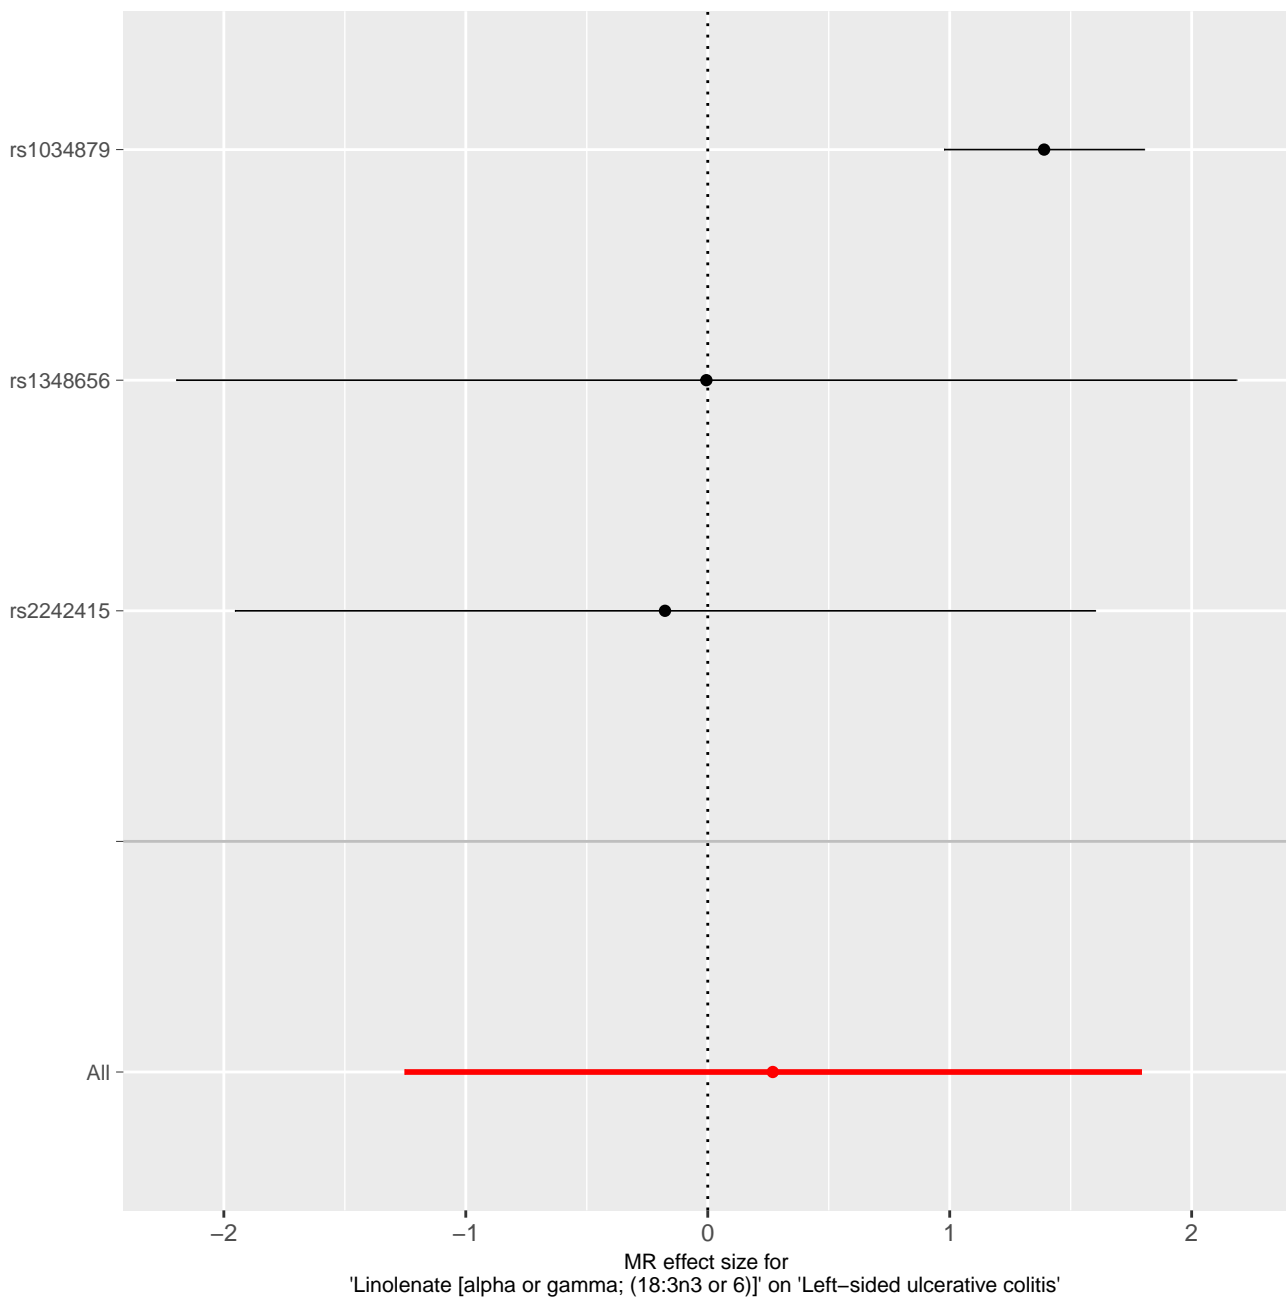

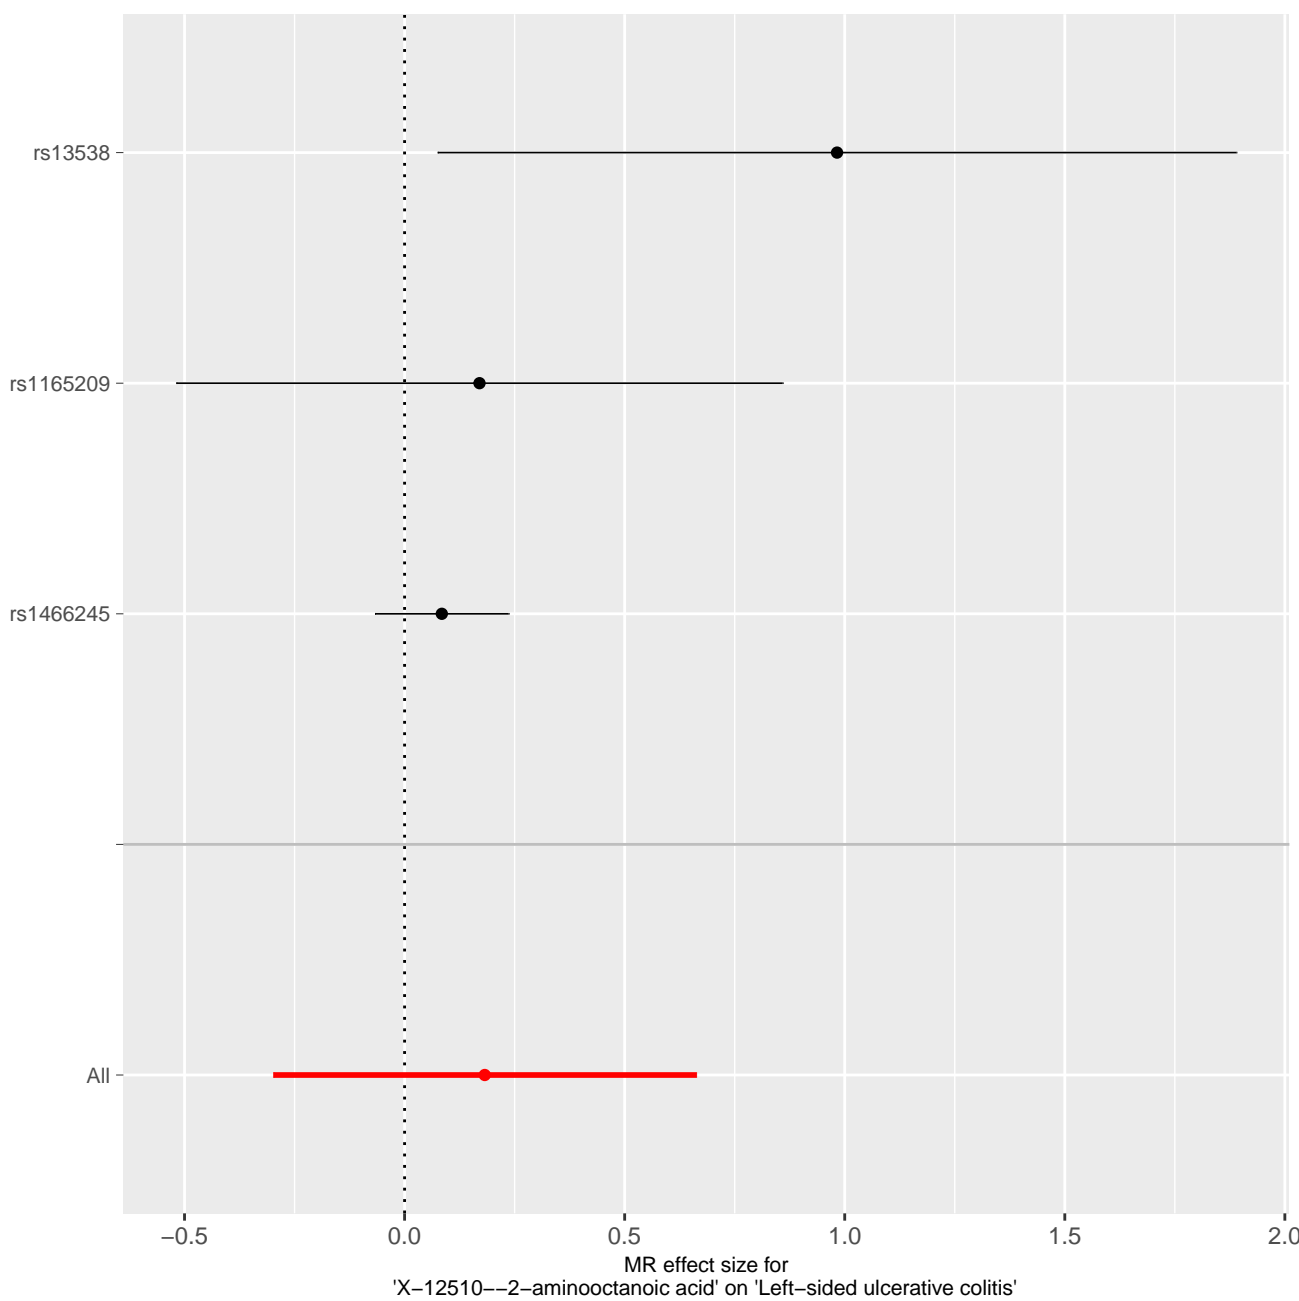

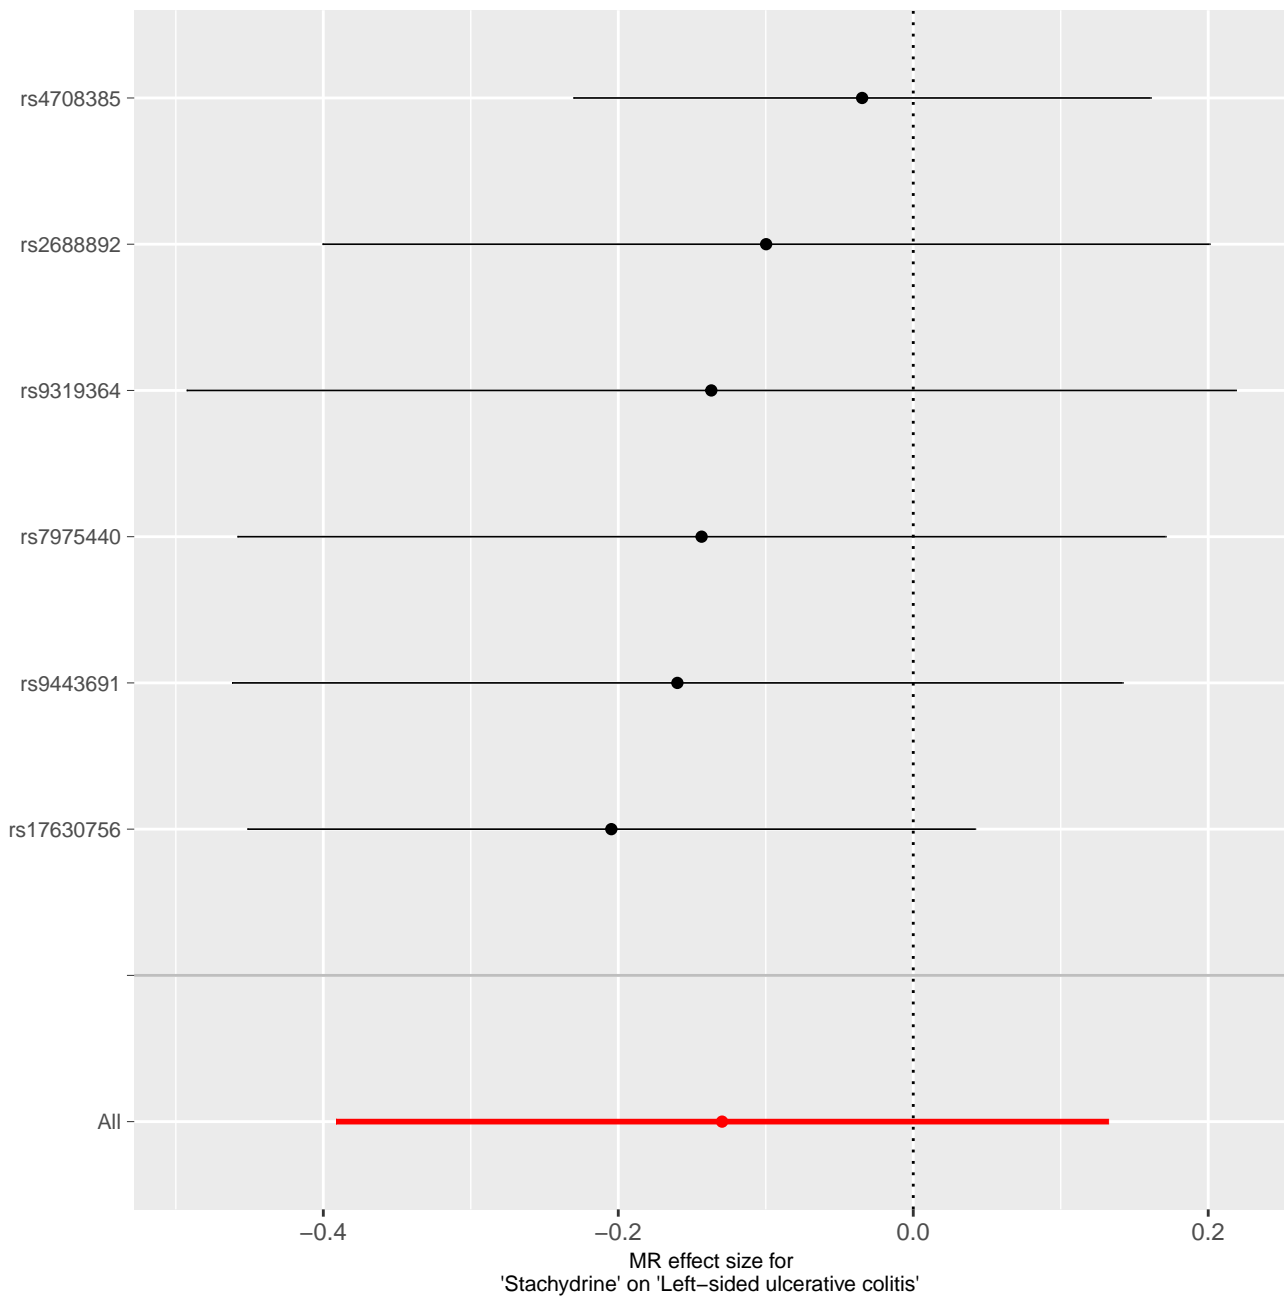



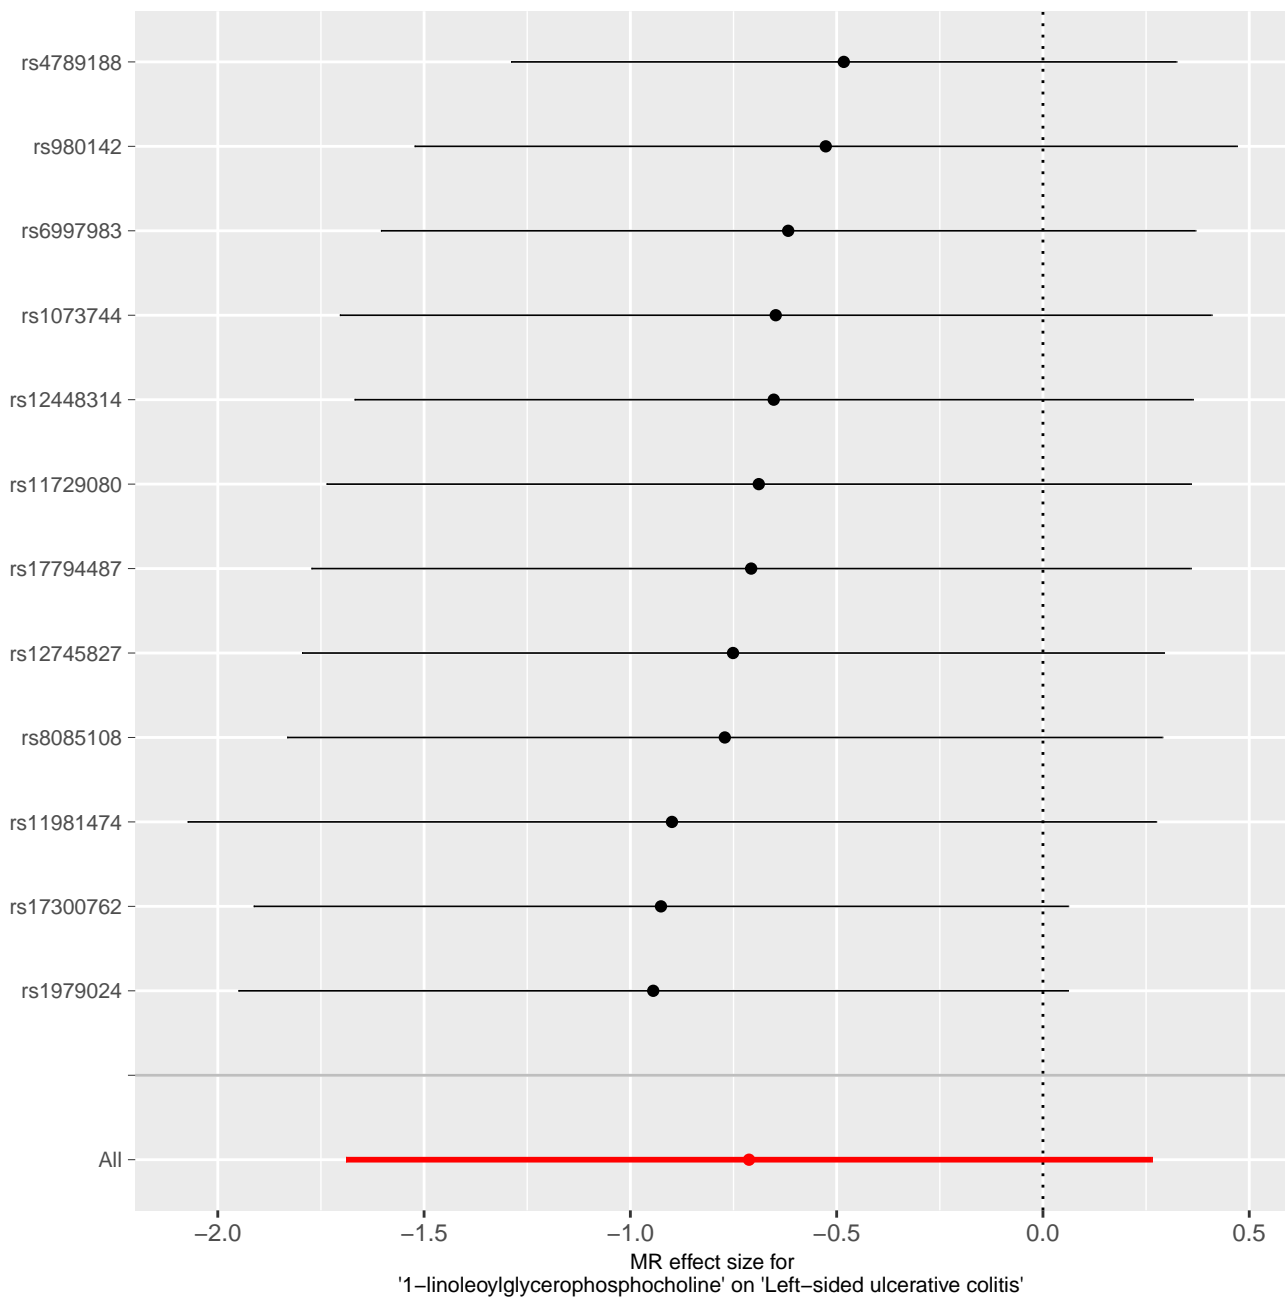

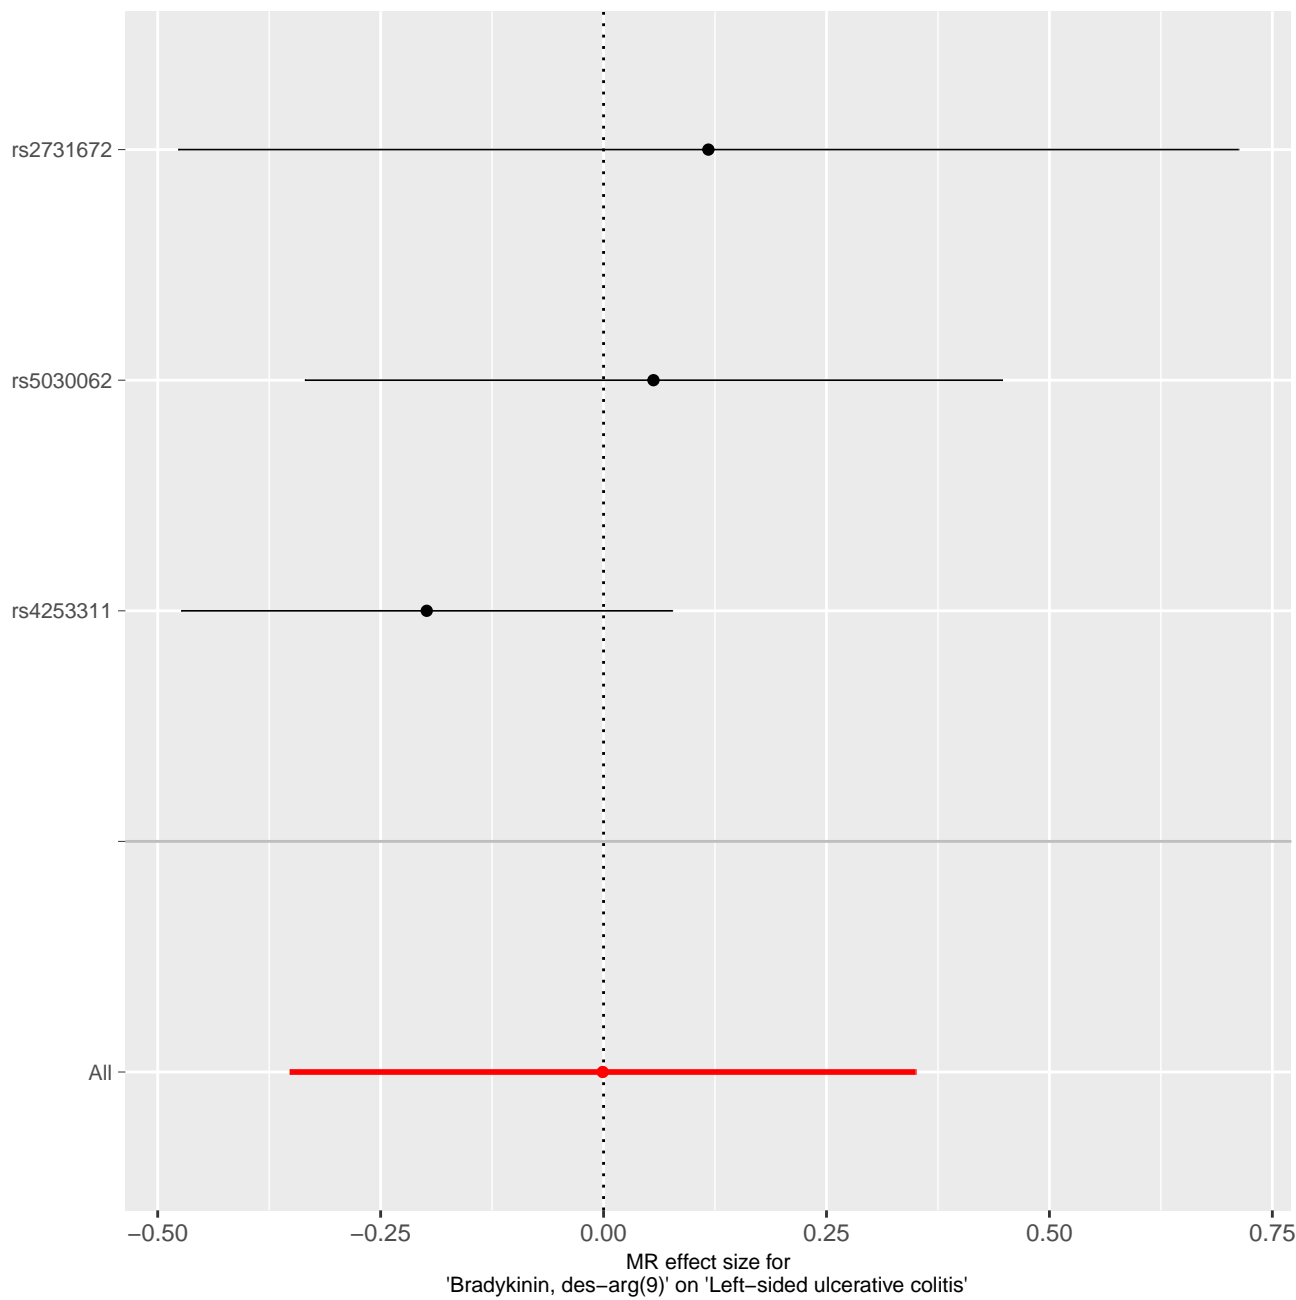

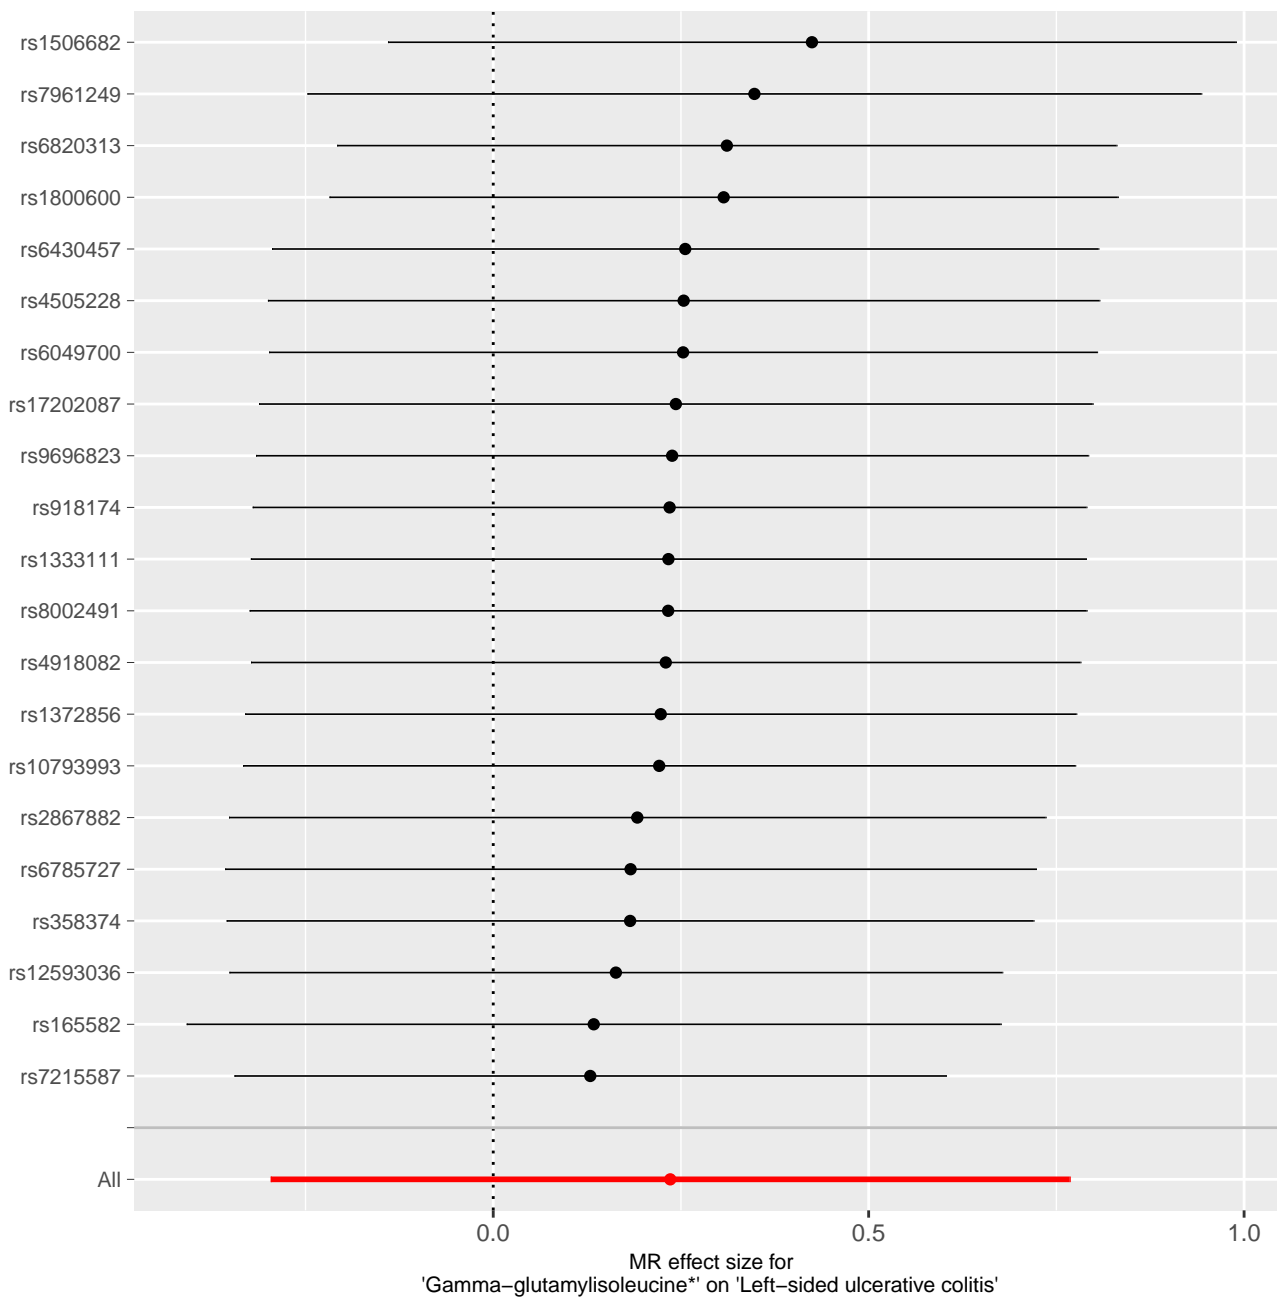

rs4861137

rs4680092

rs1456197

rs6907935

All

MR effect size for  
'Isovalerate' on 'Left-sided ulcerative colitis'

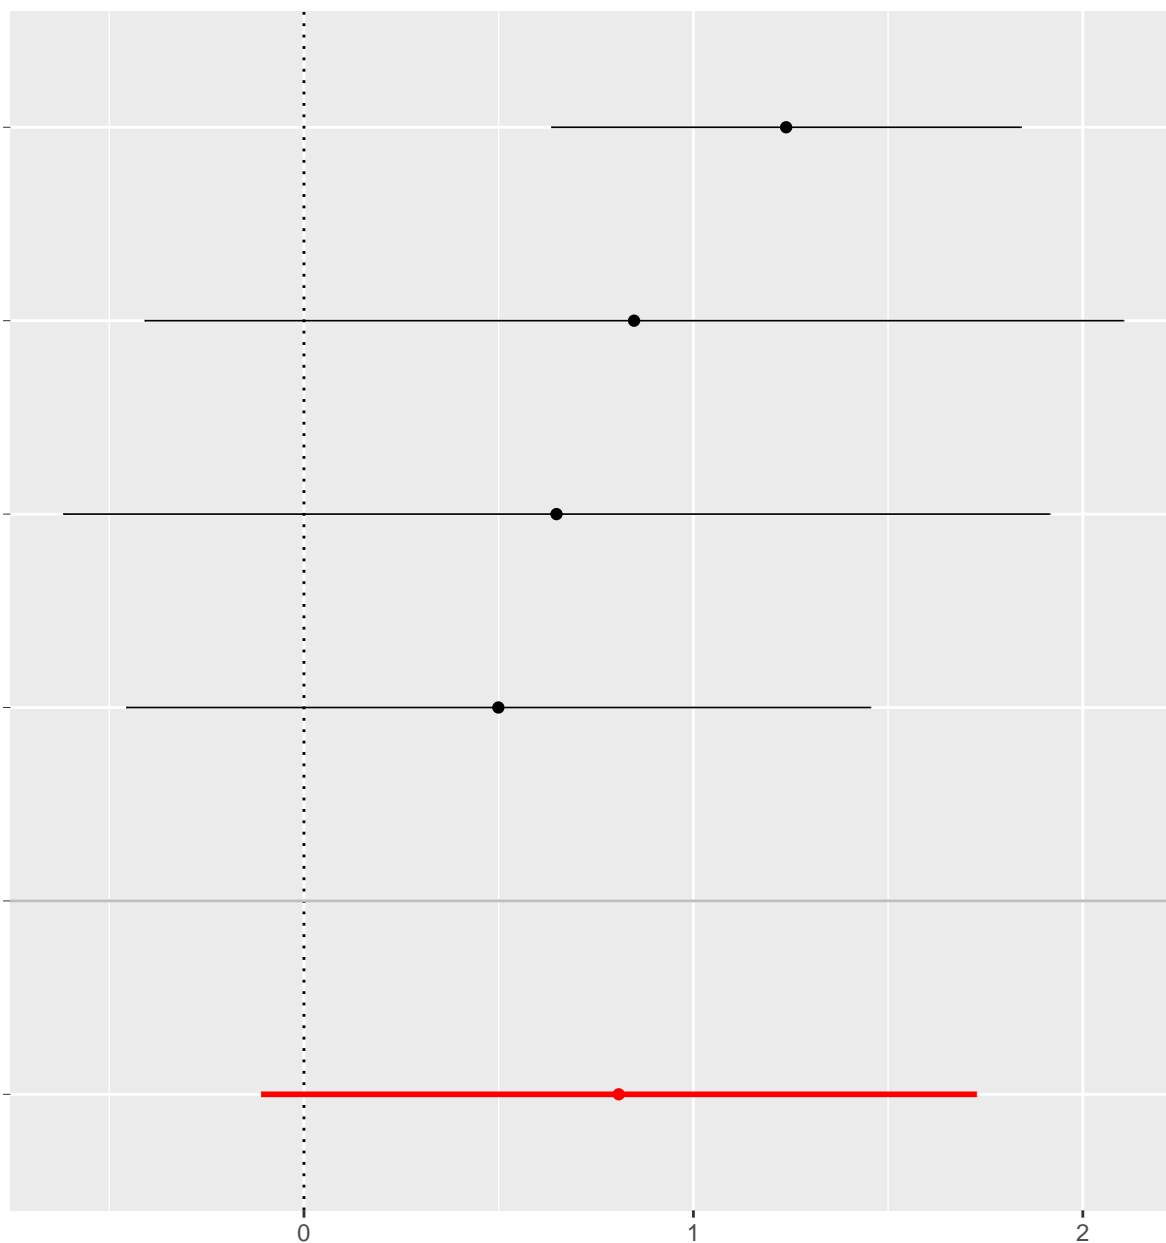

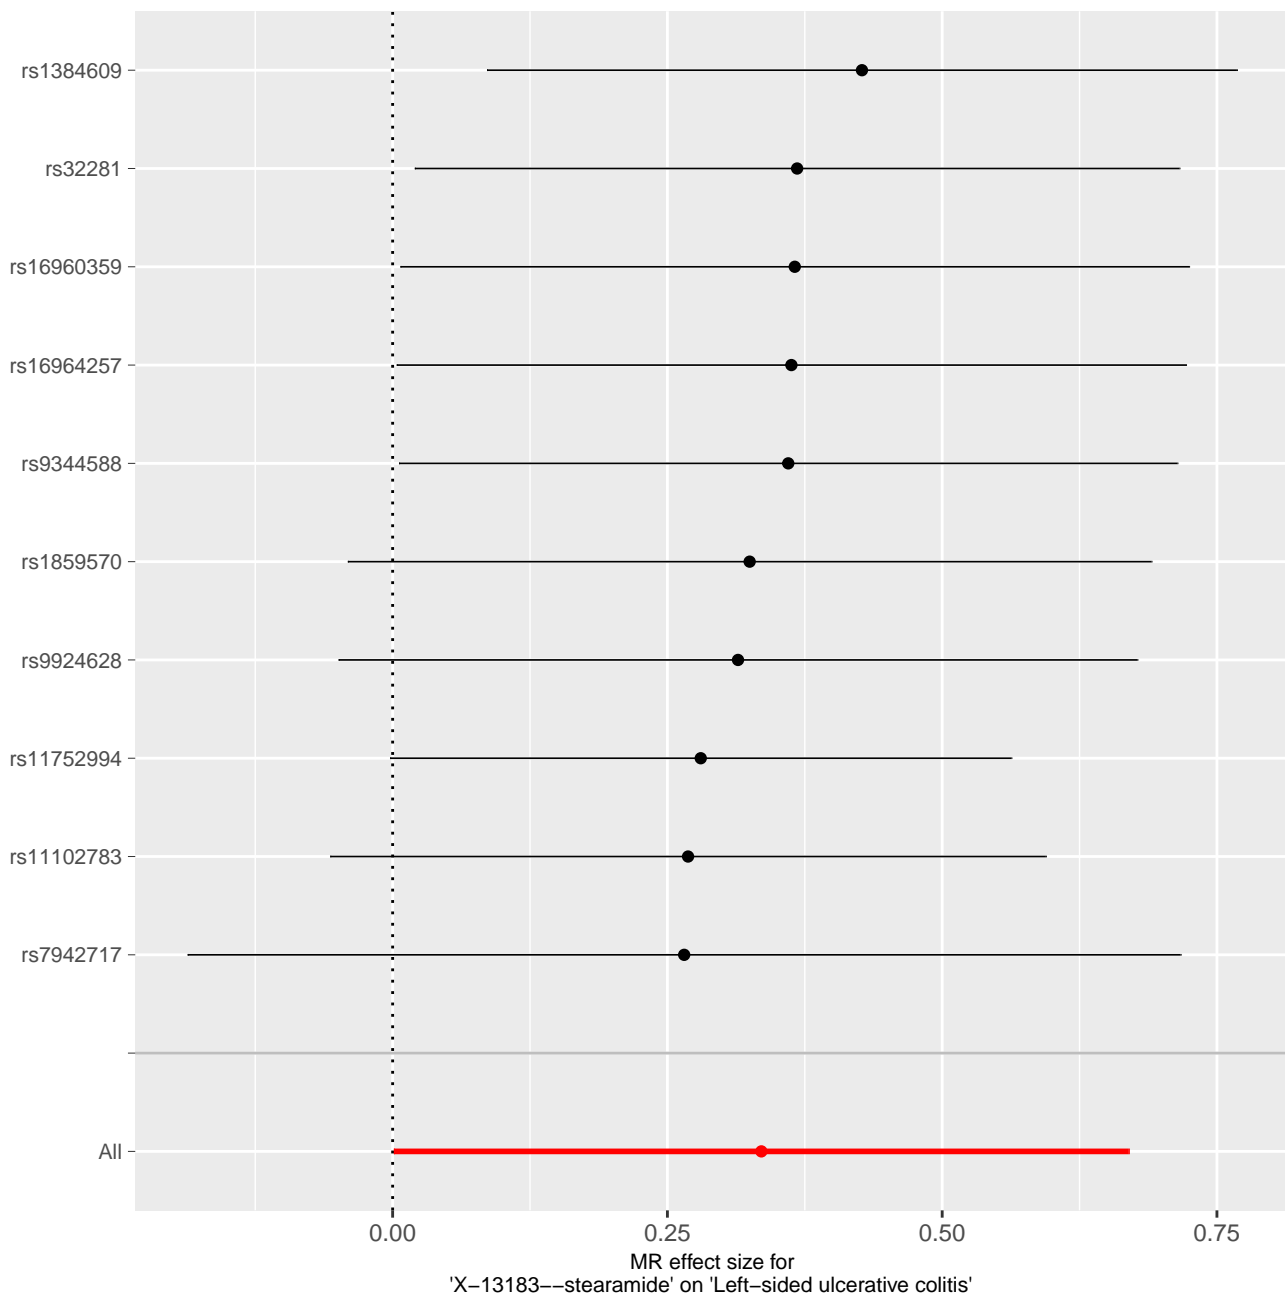

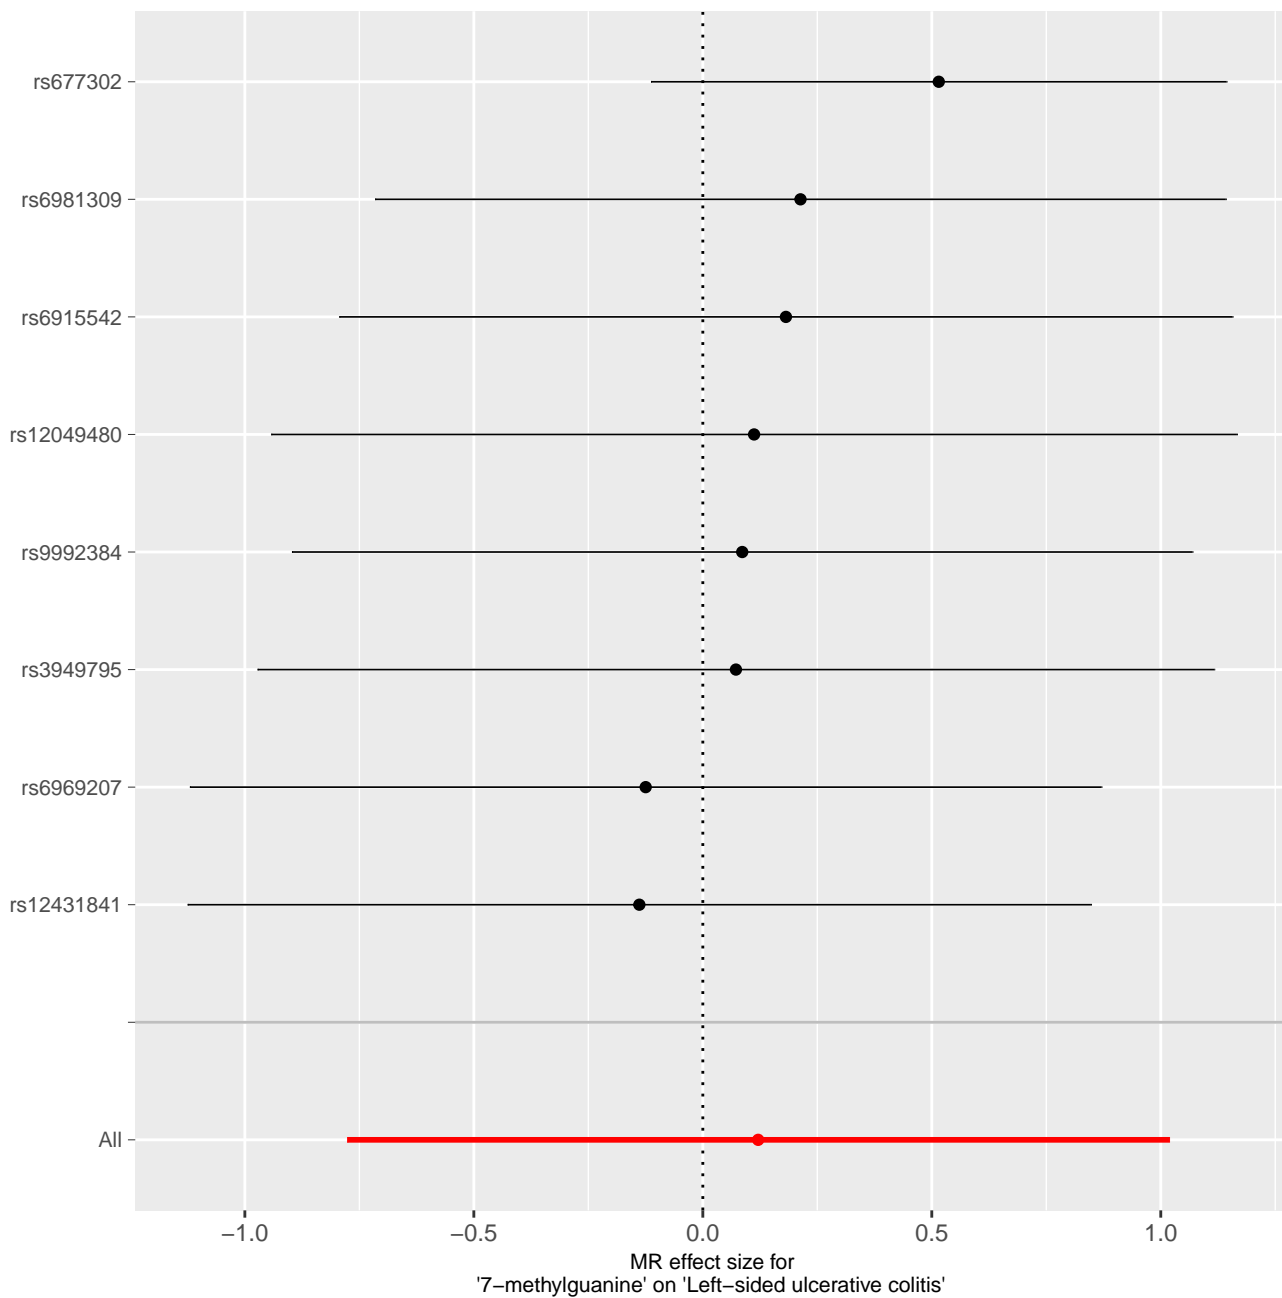

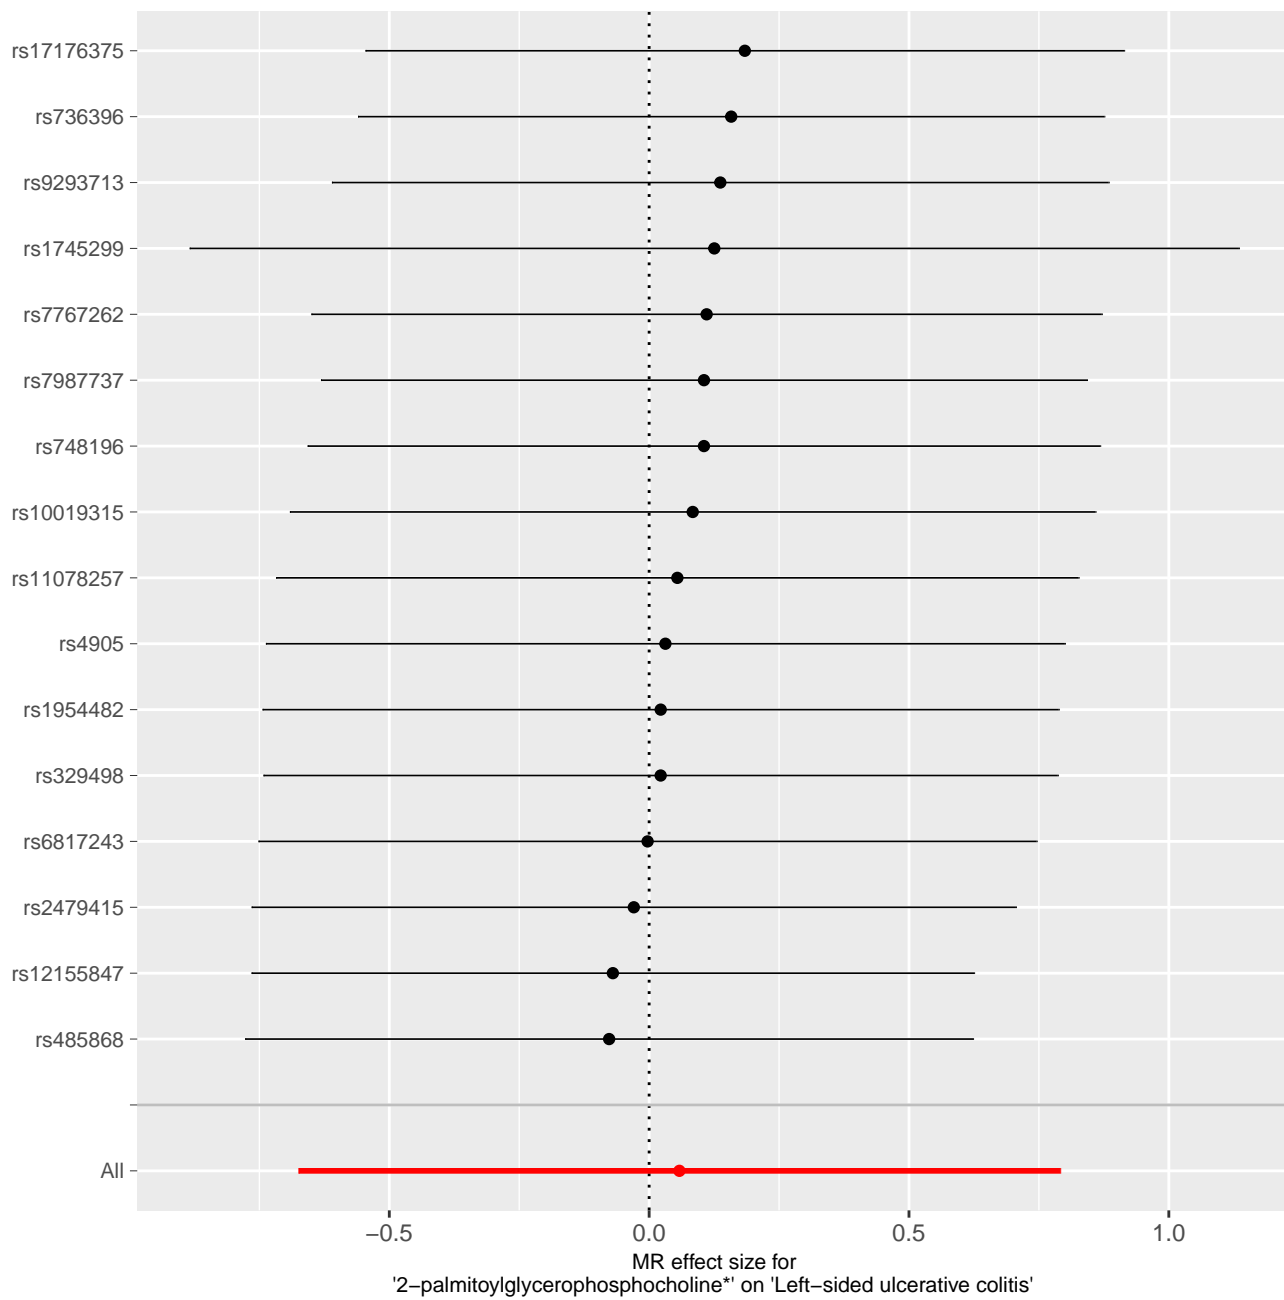

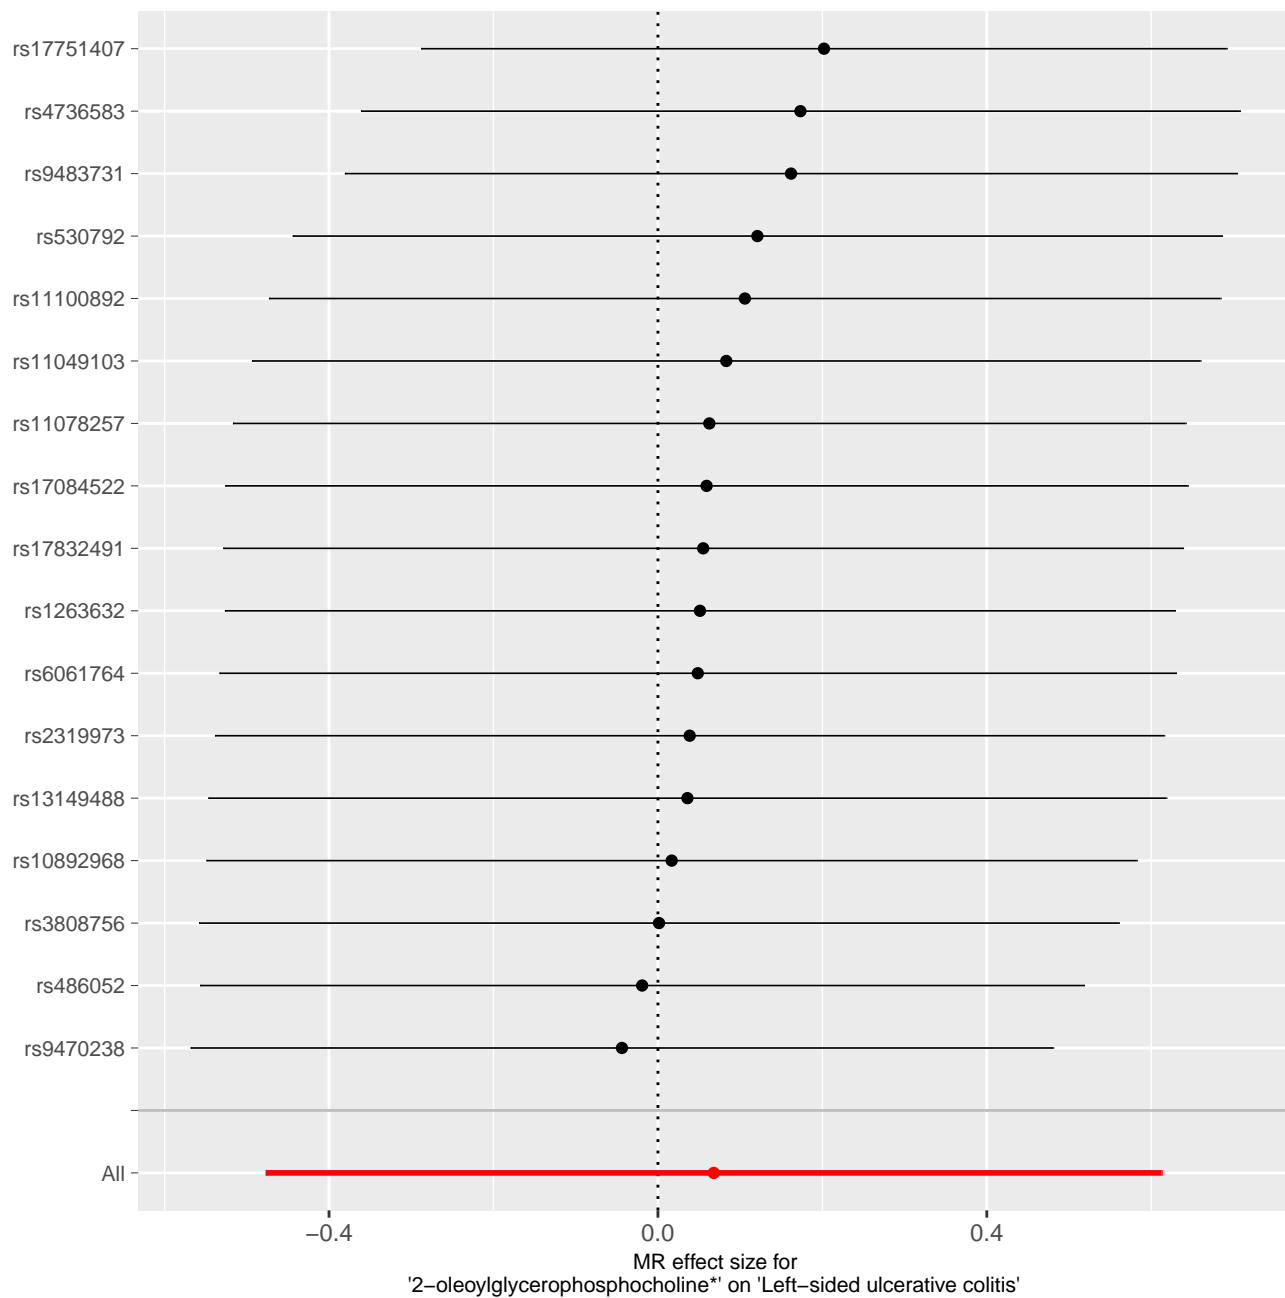



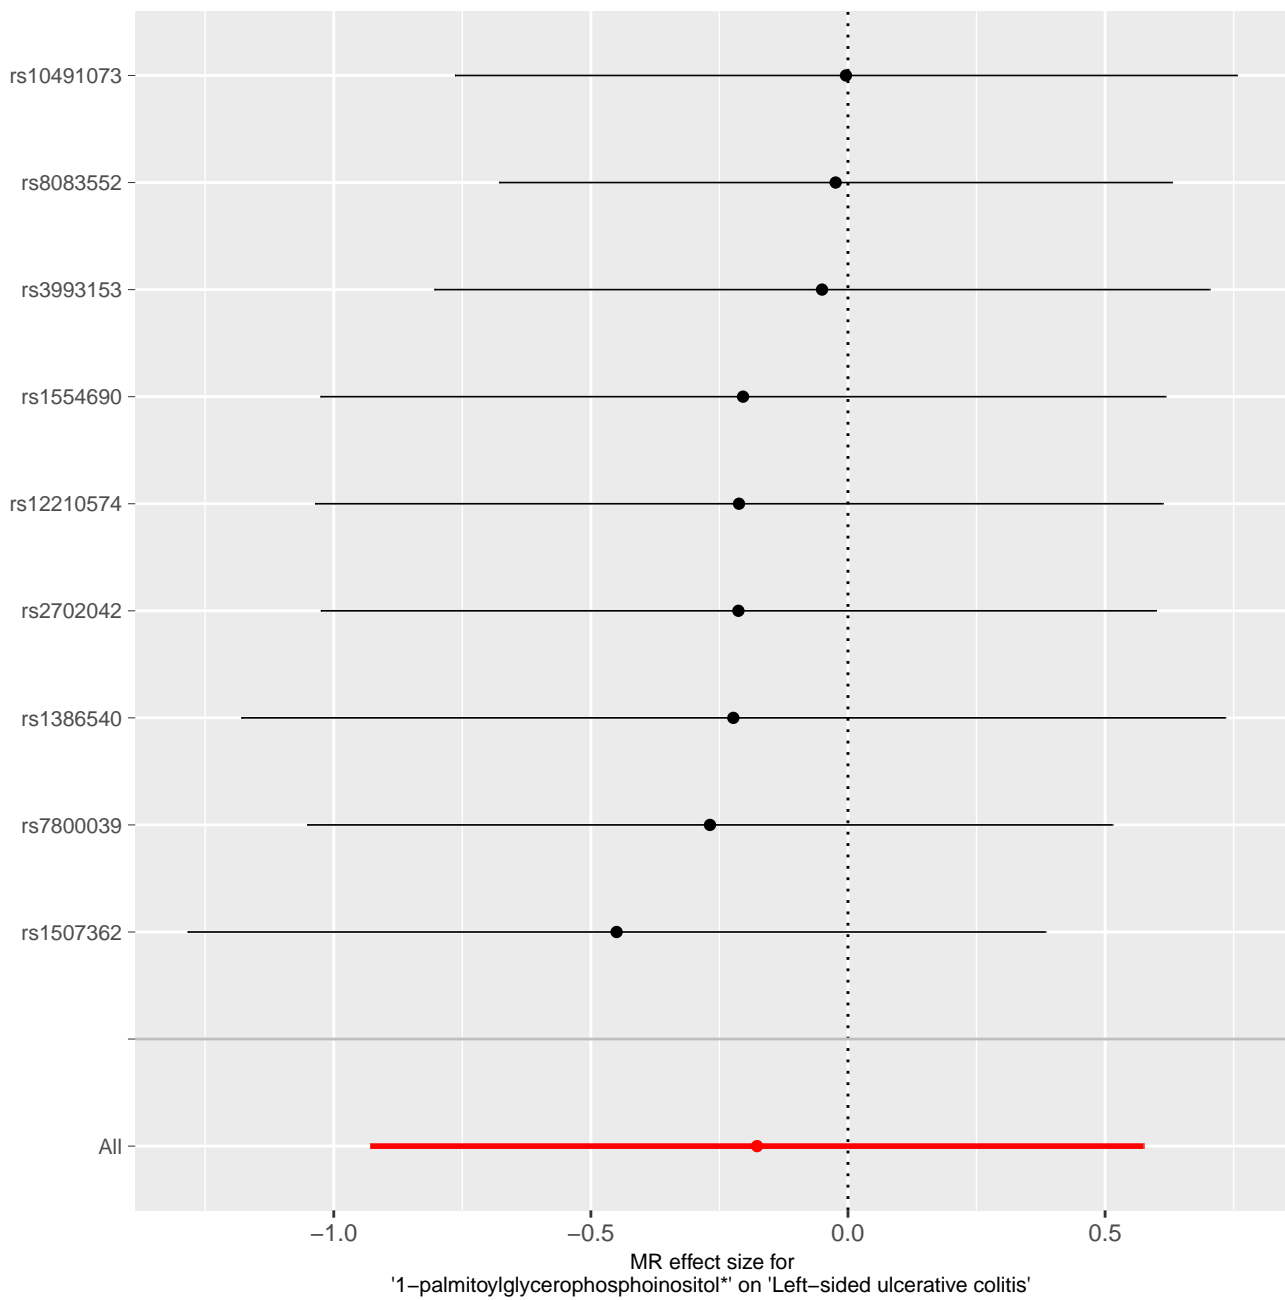

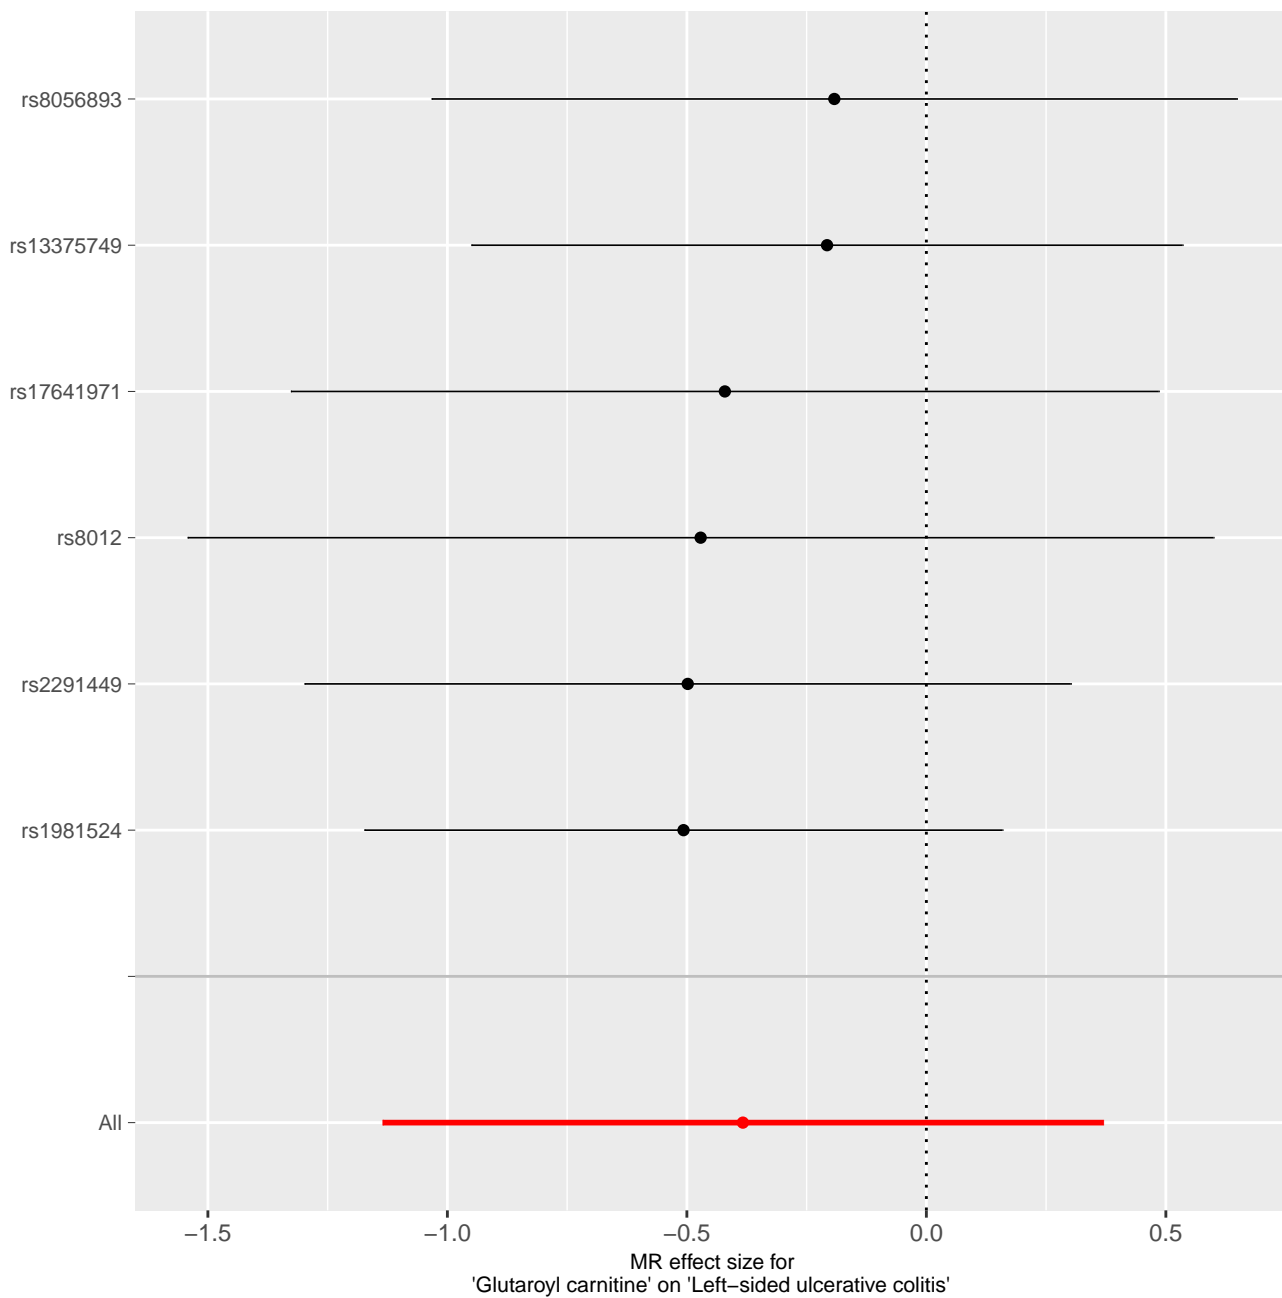

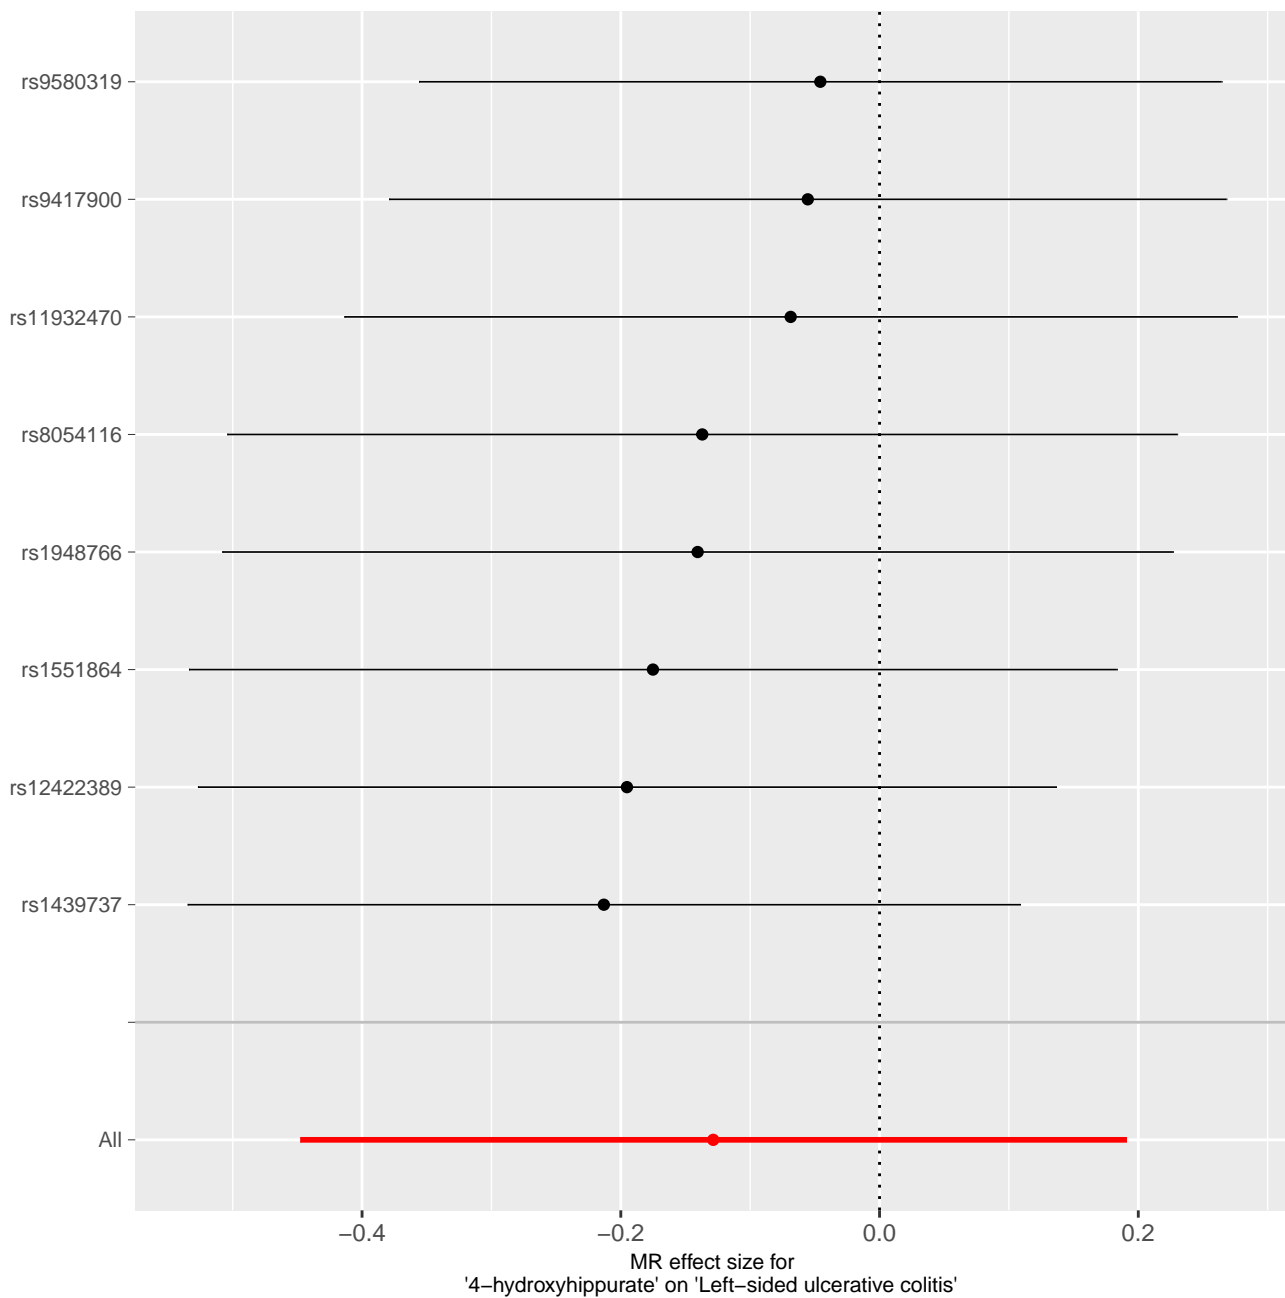

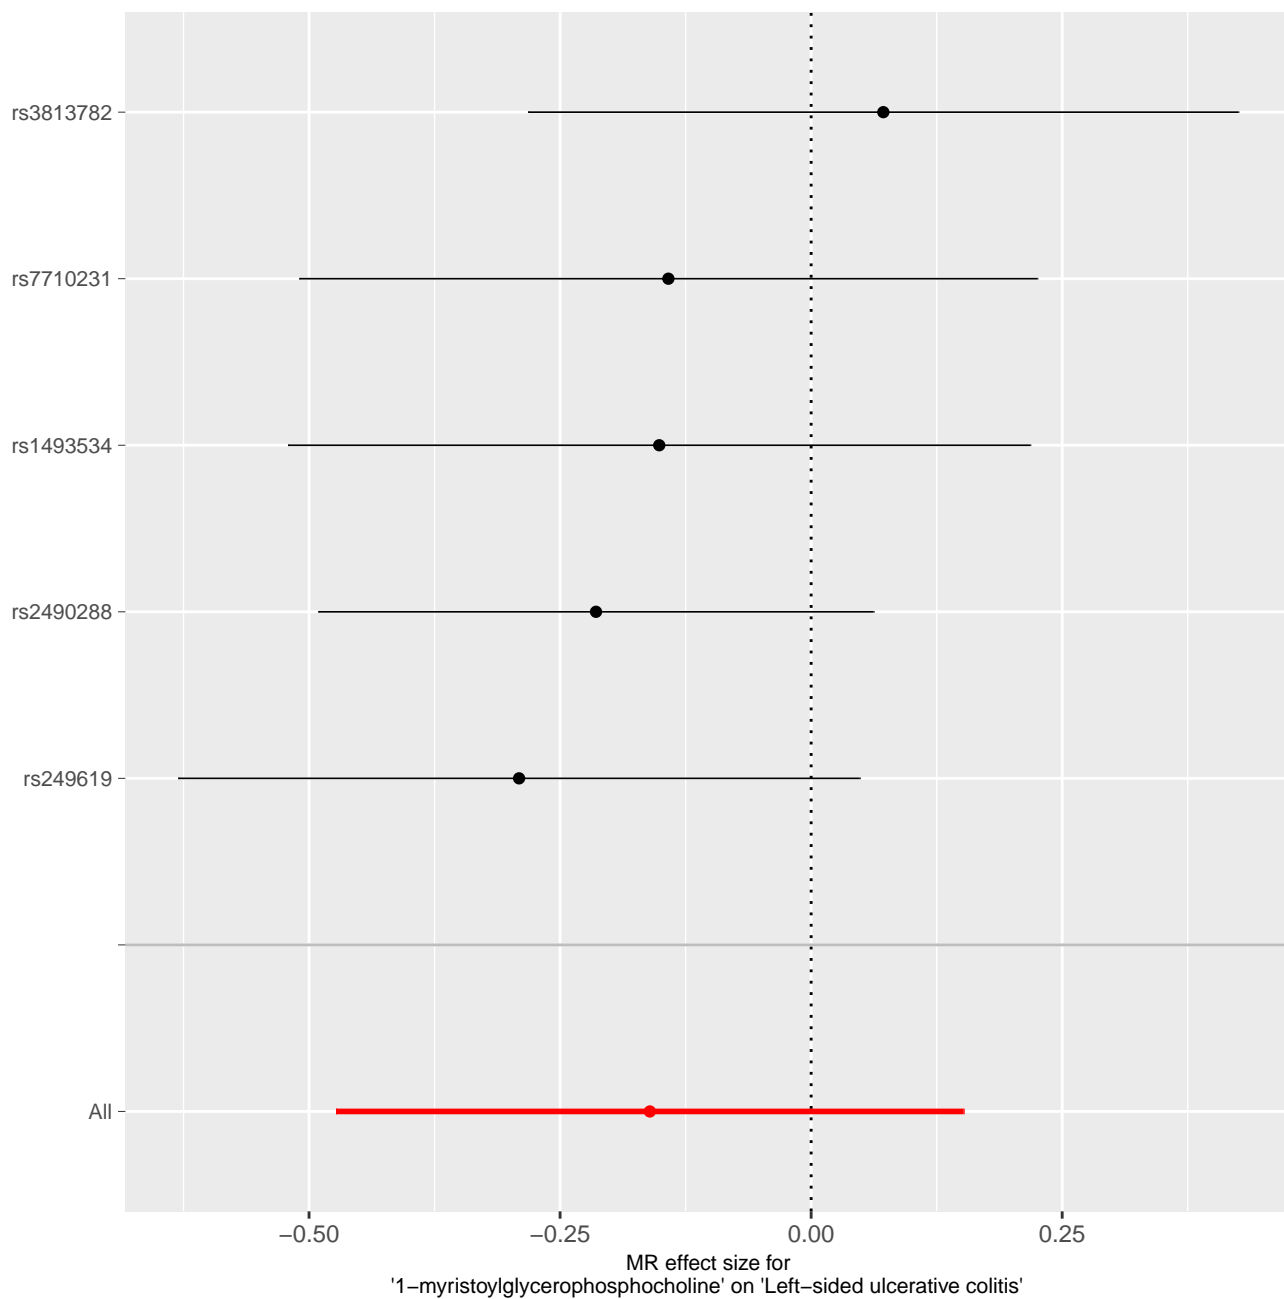

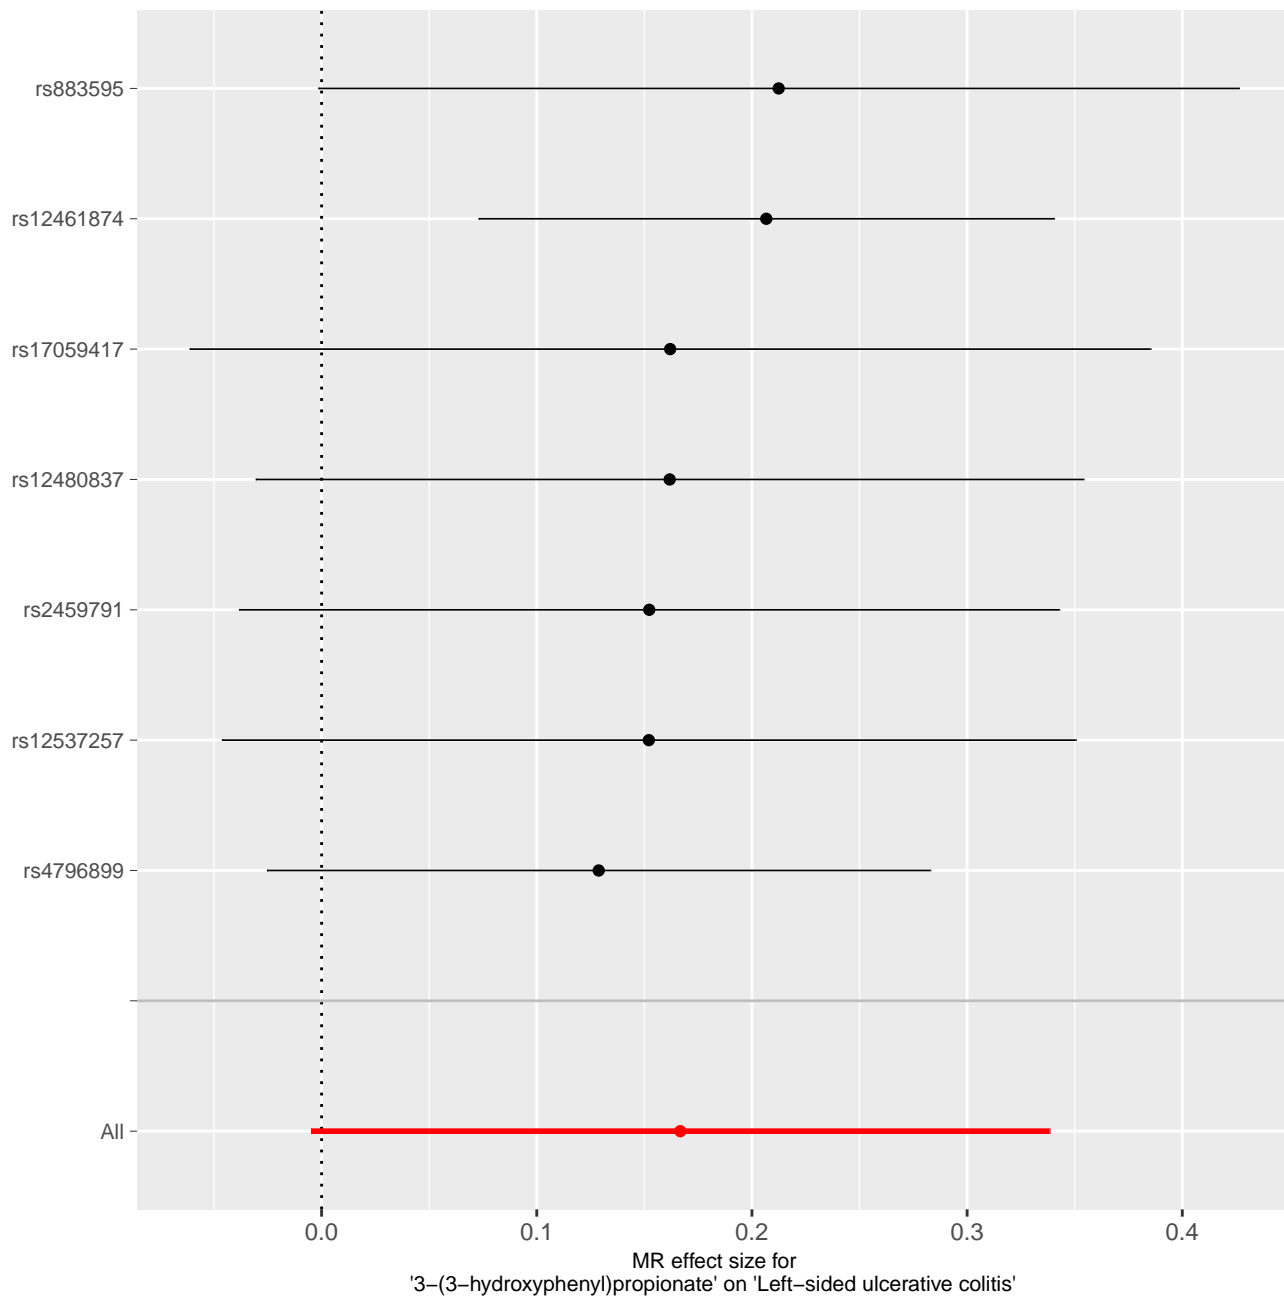

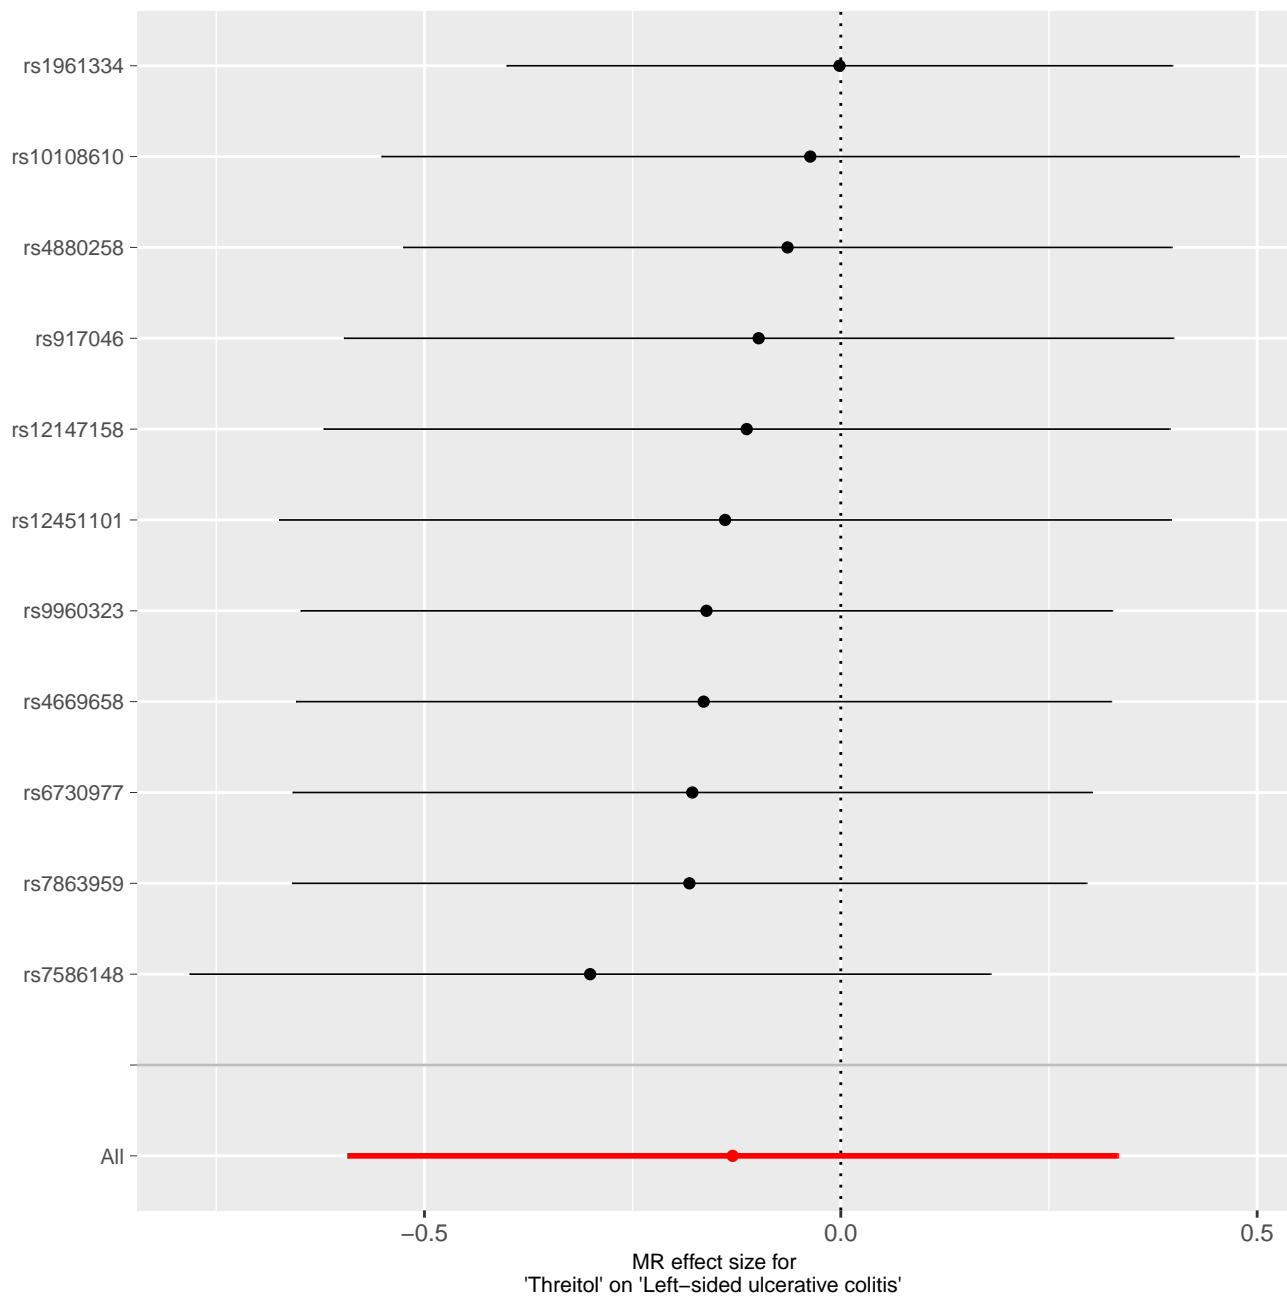

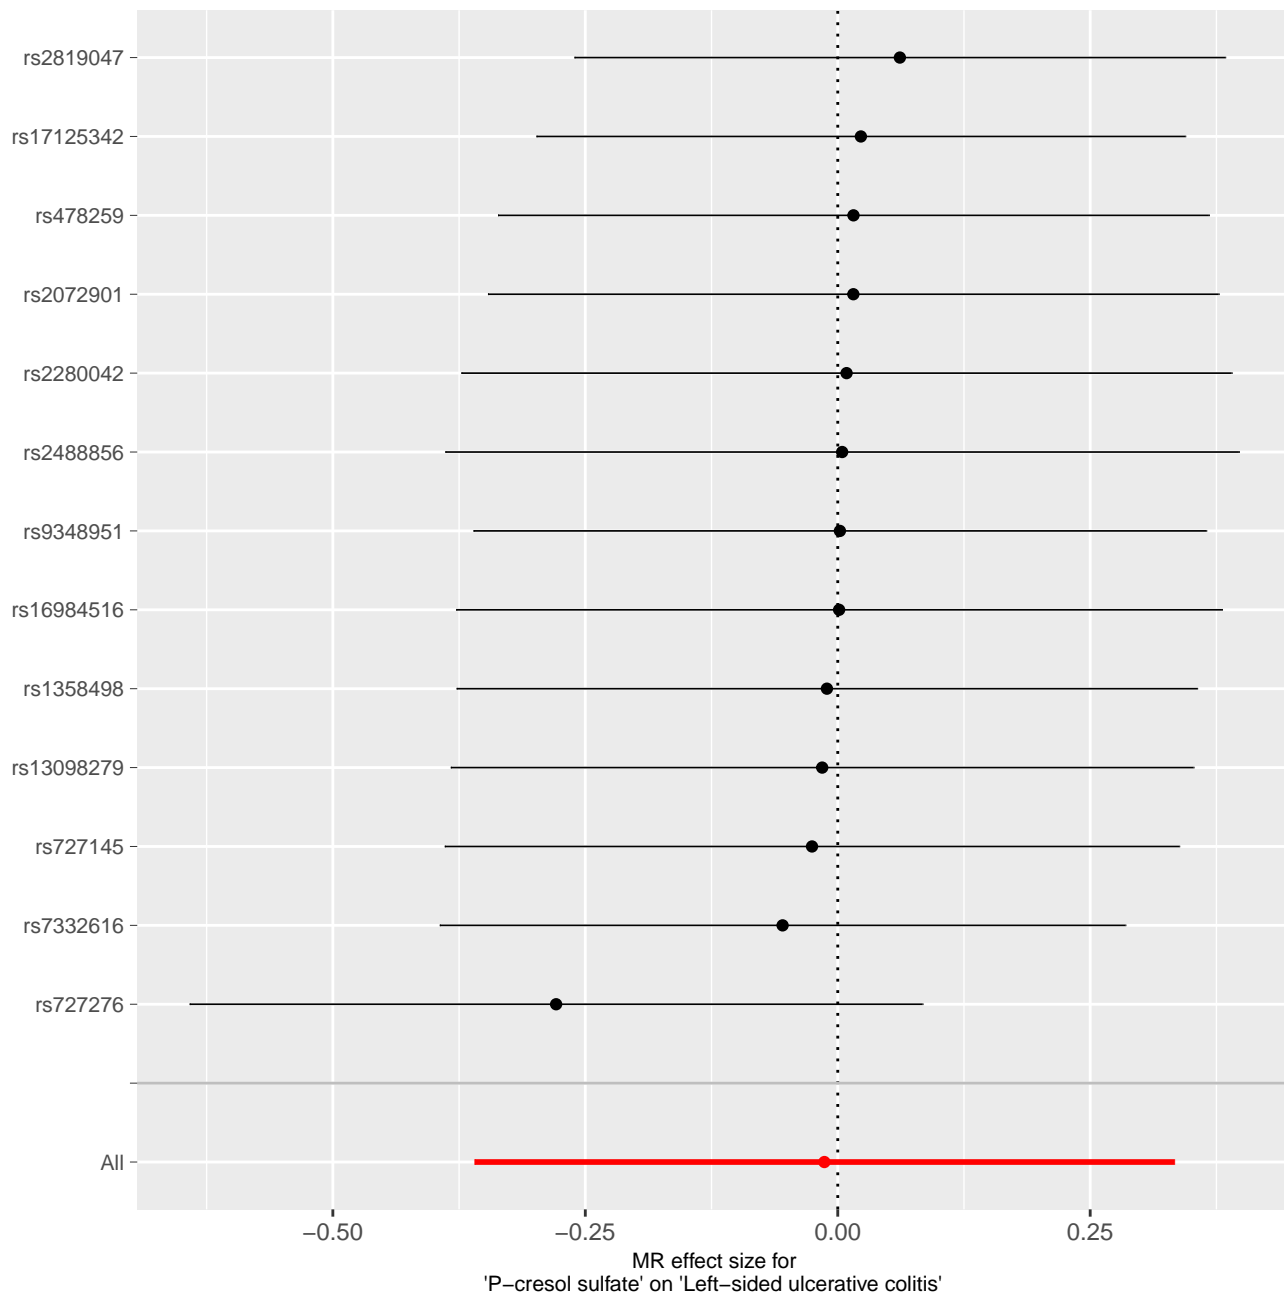

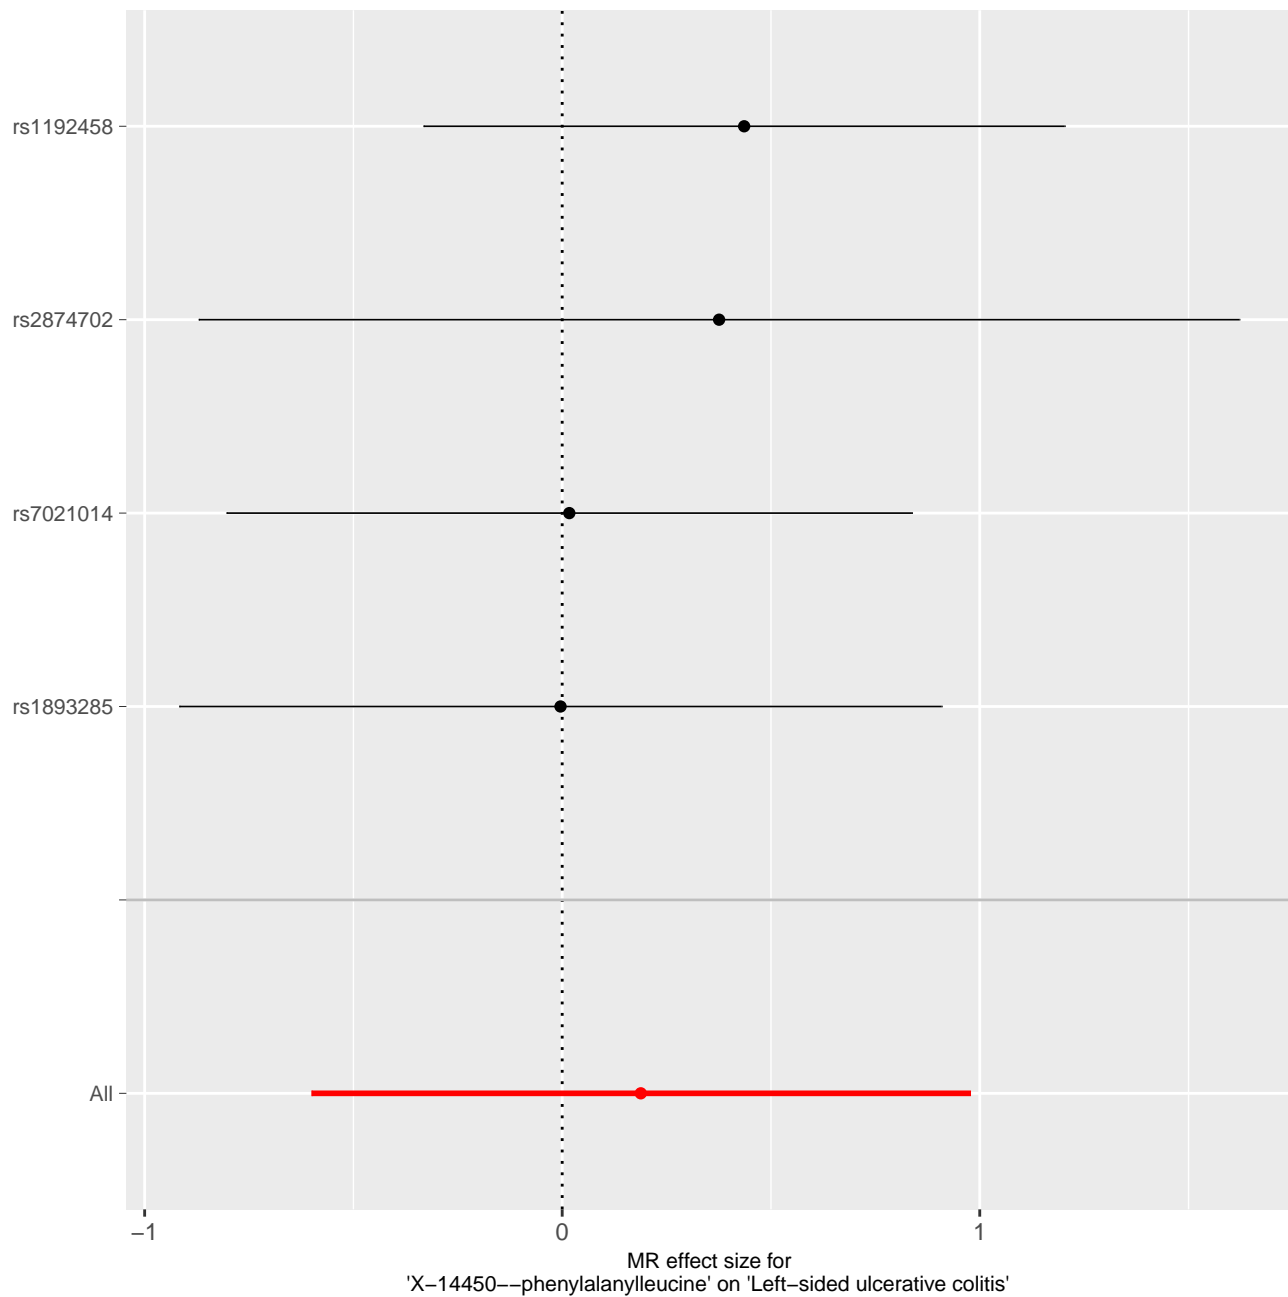



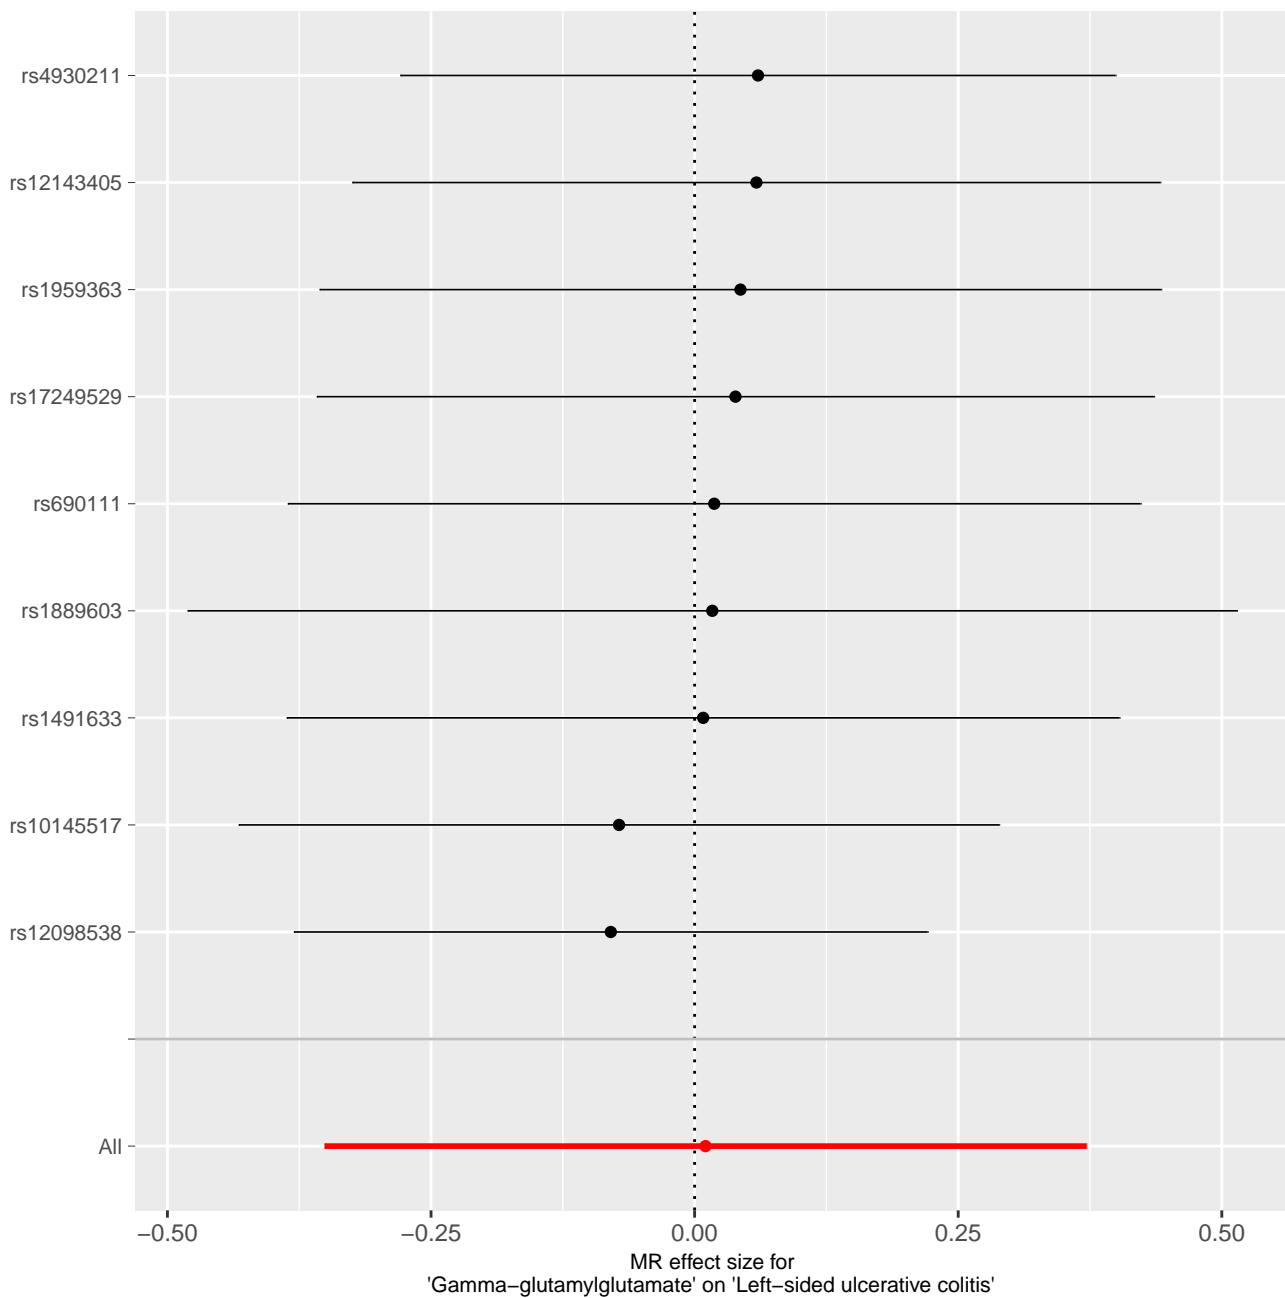

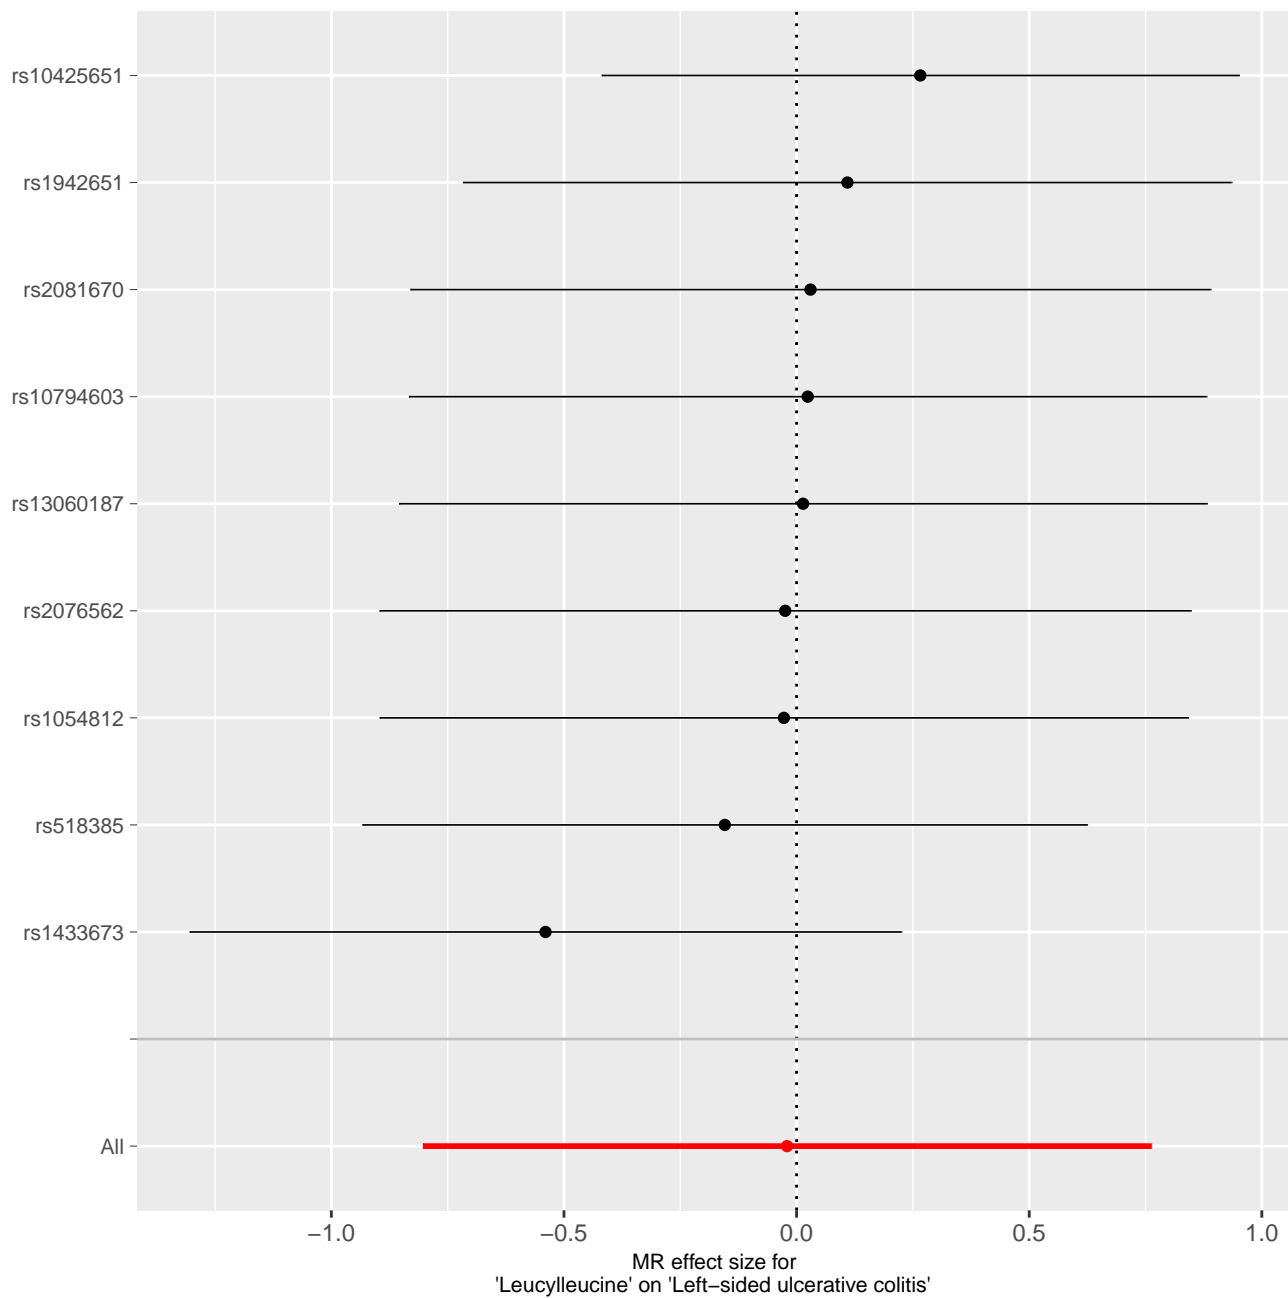

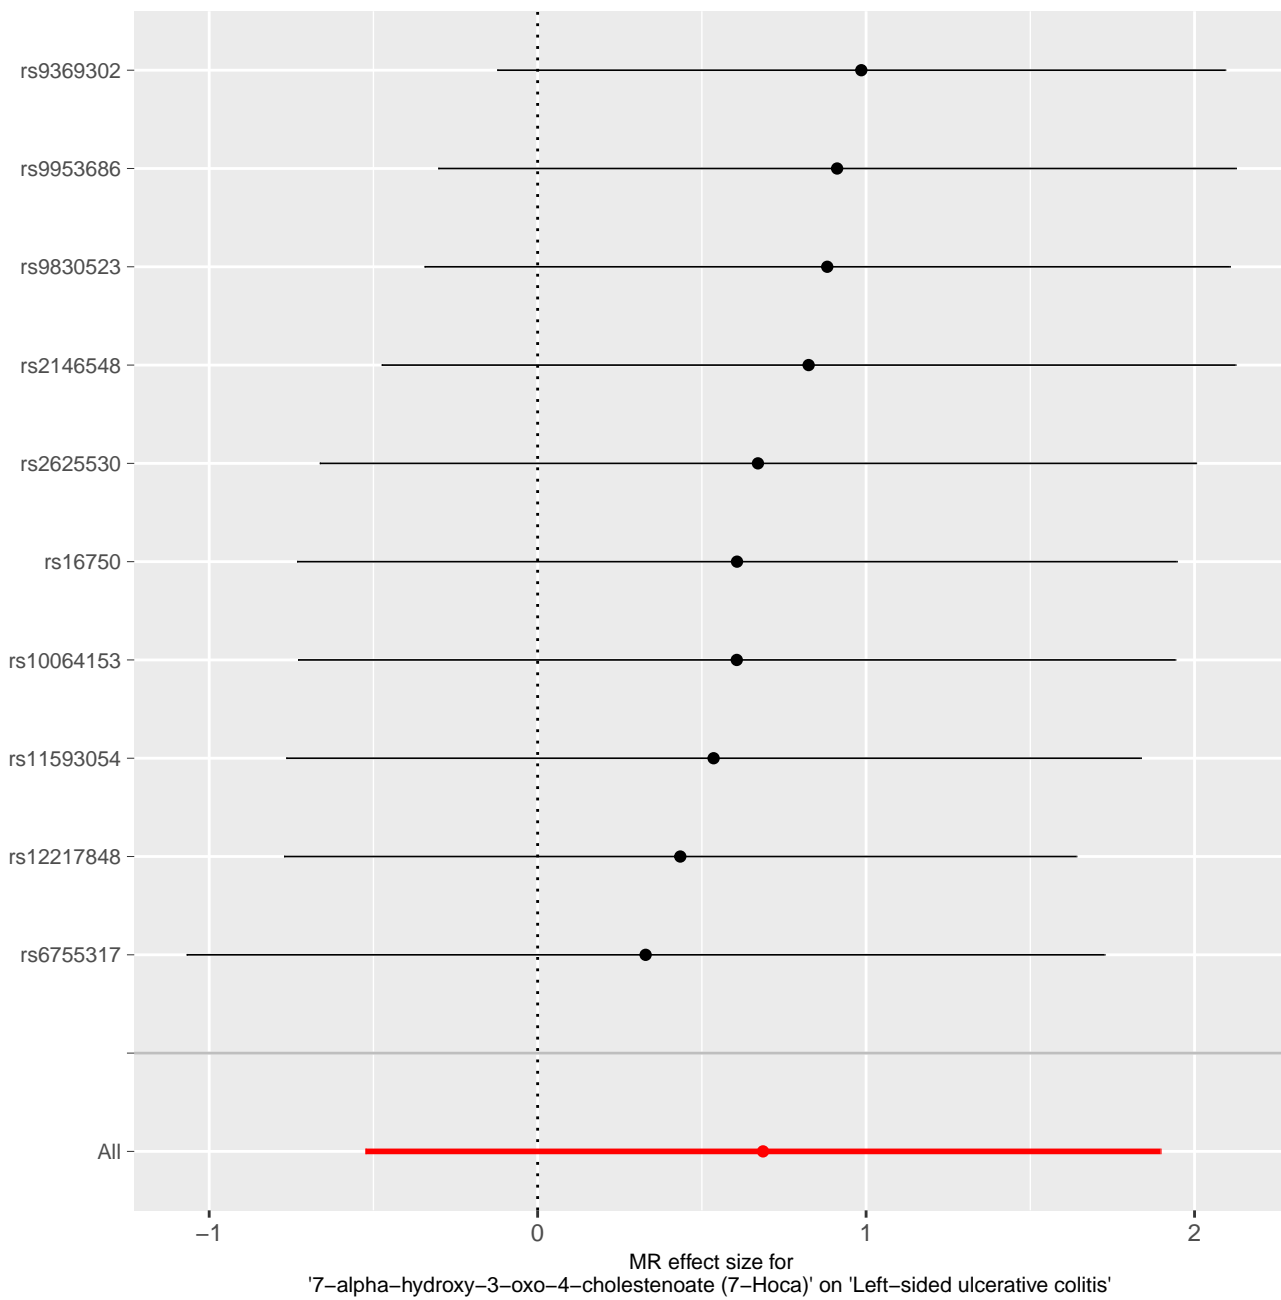

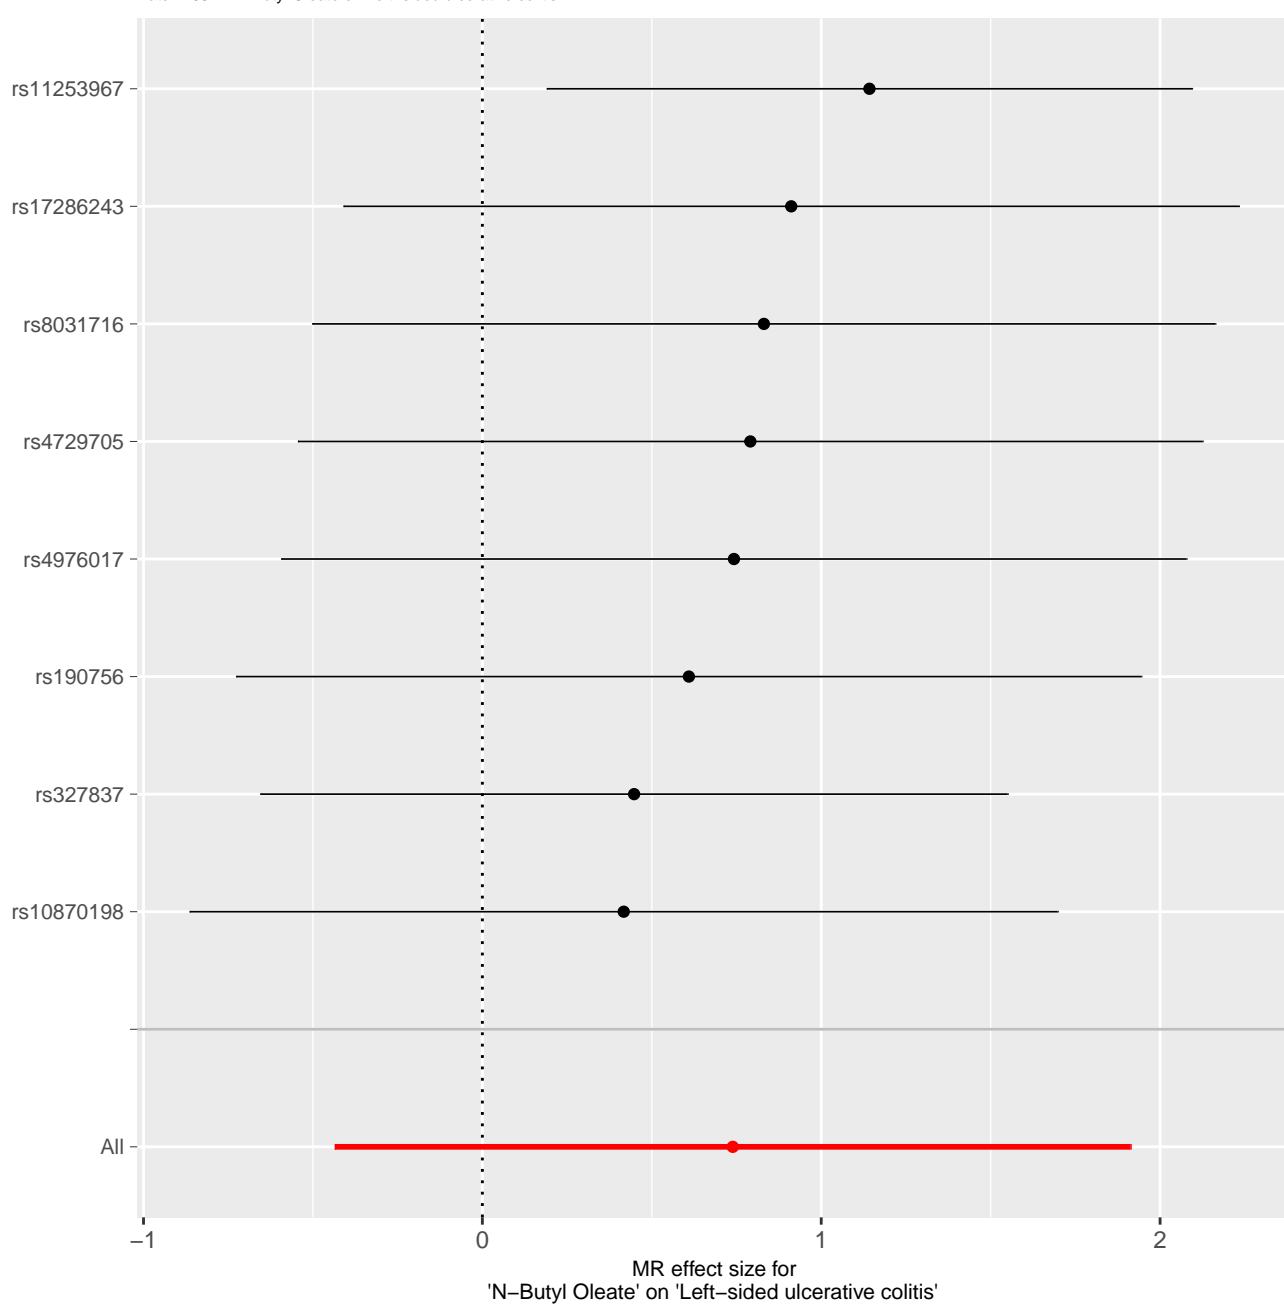

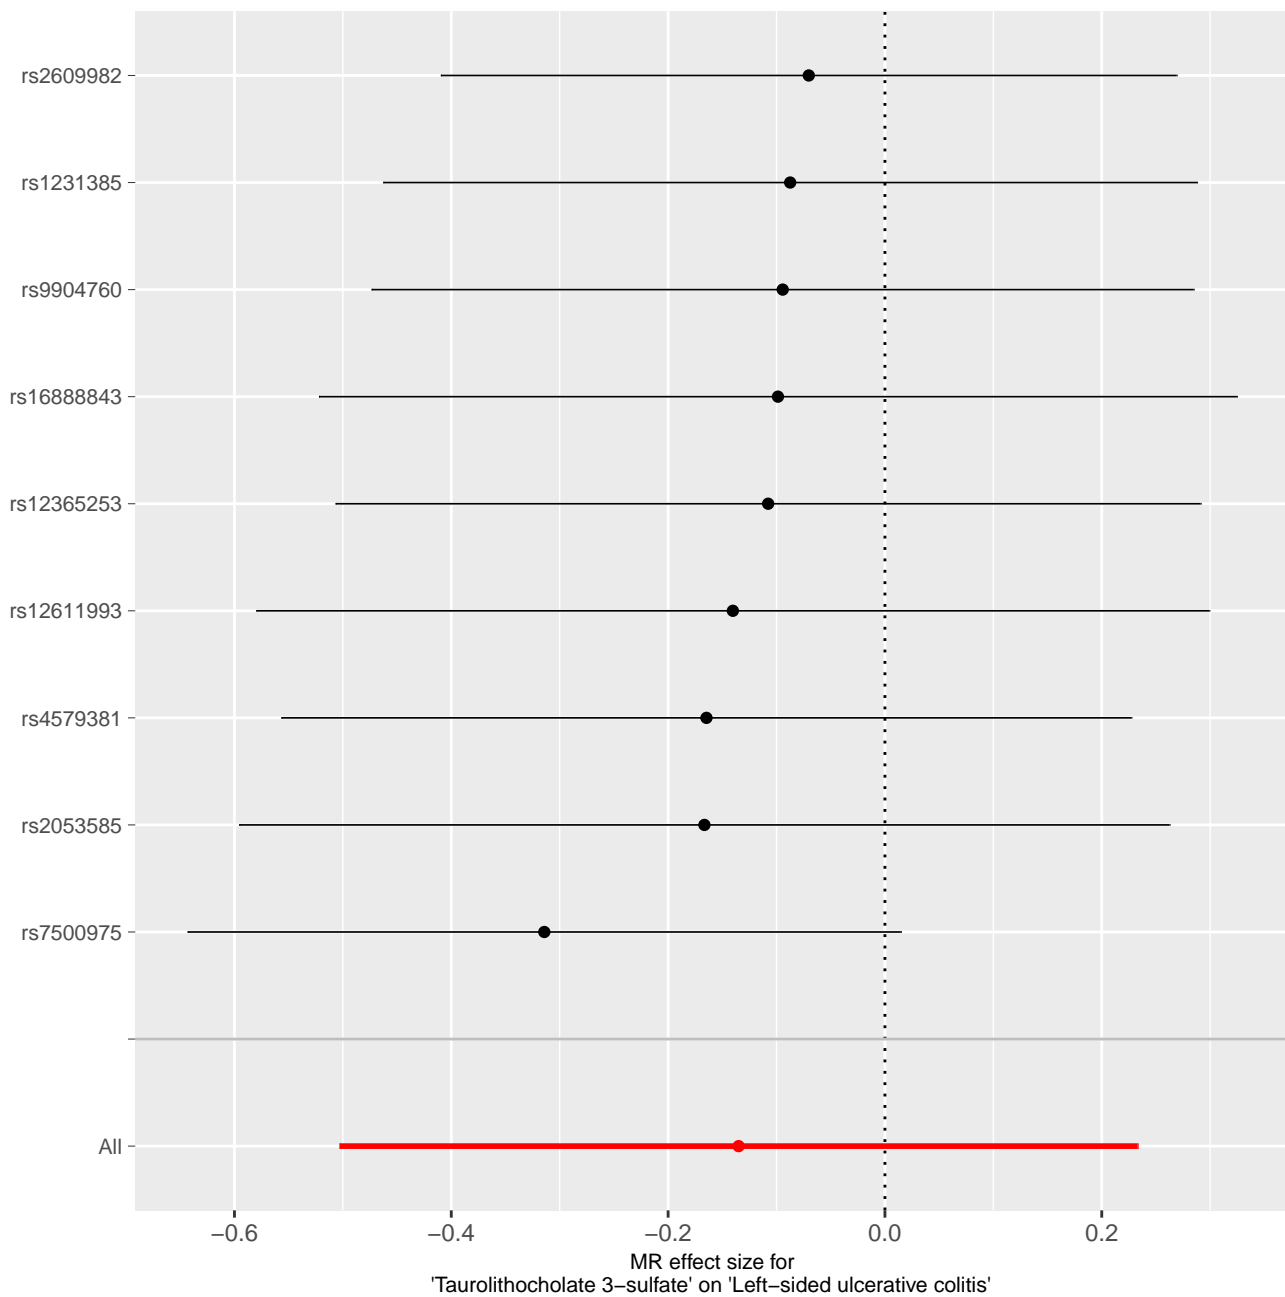

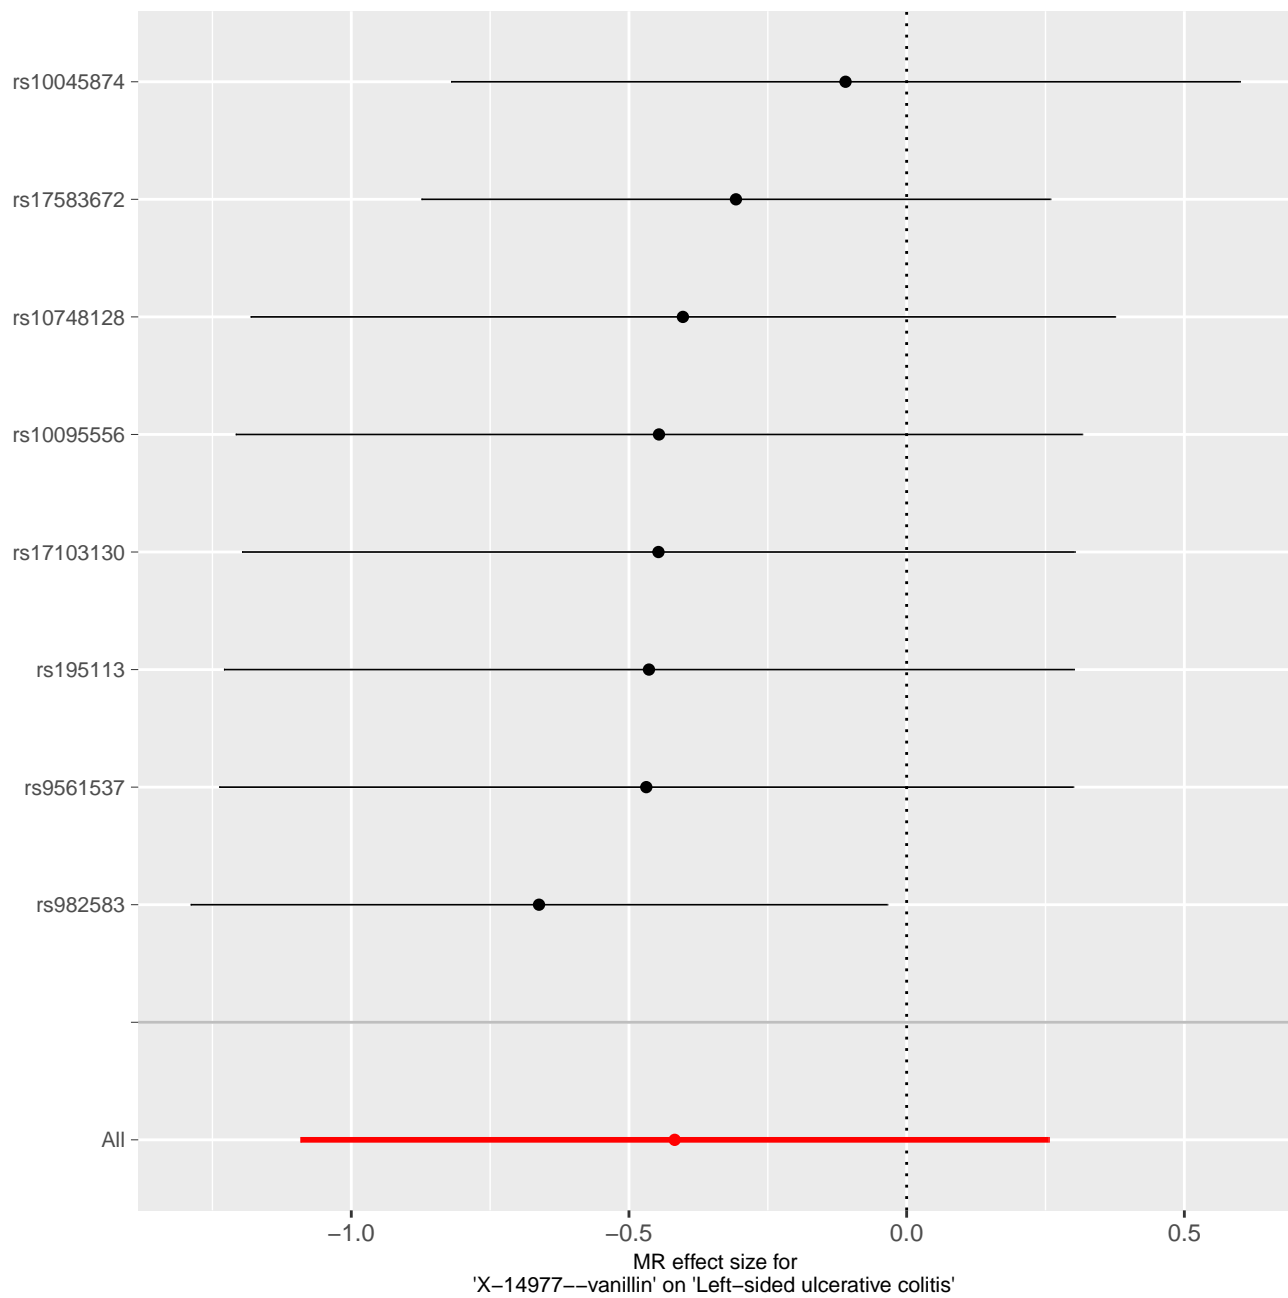

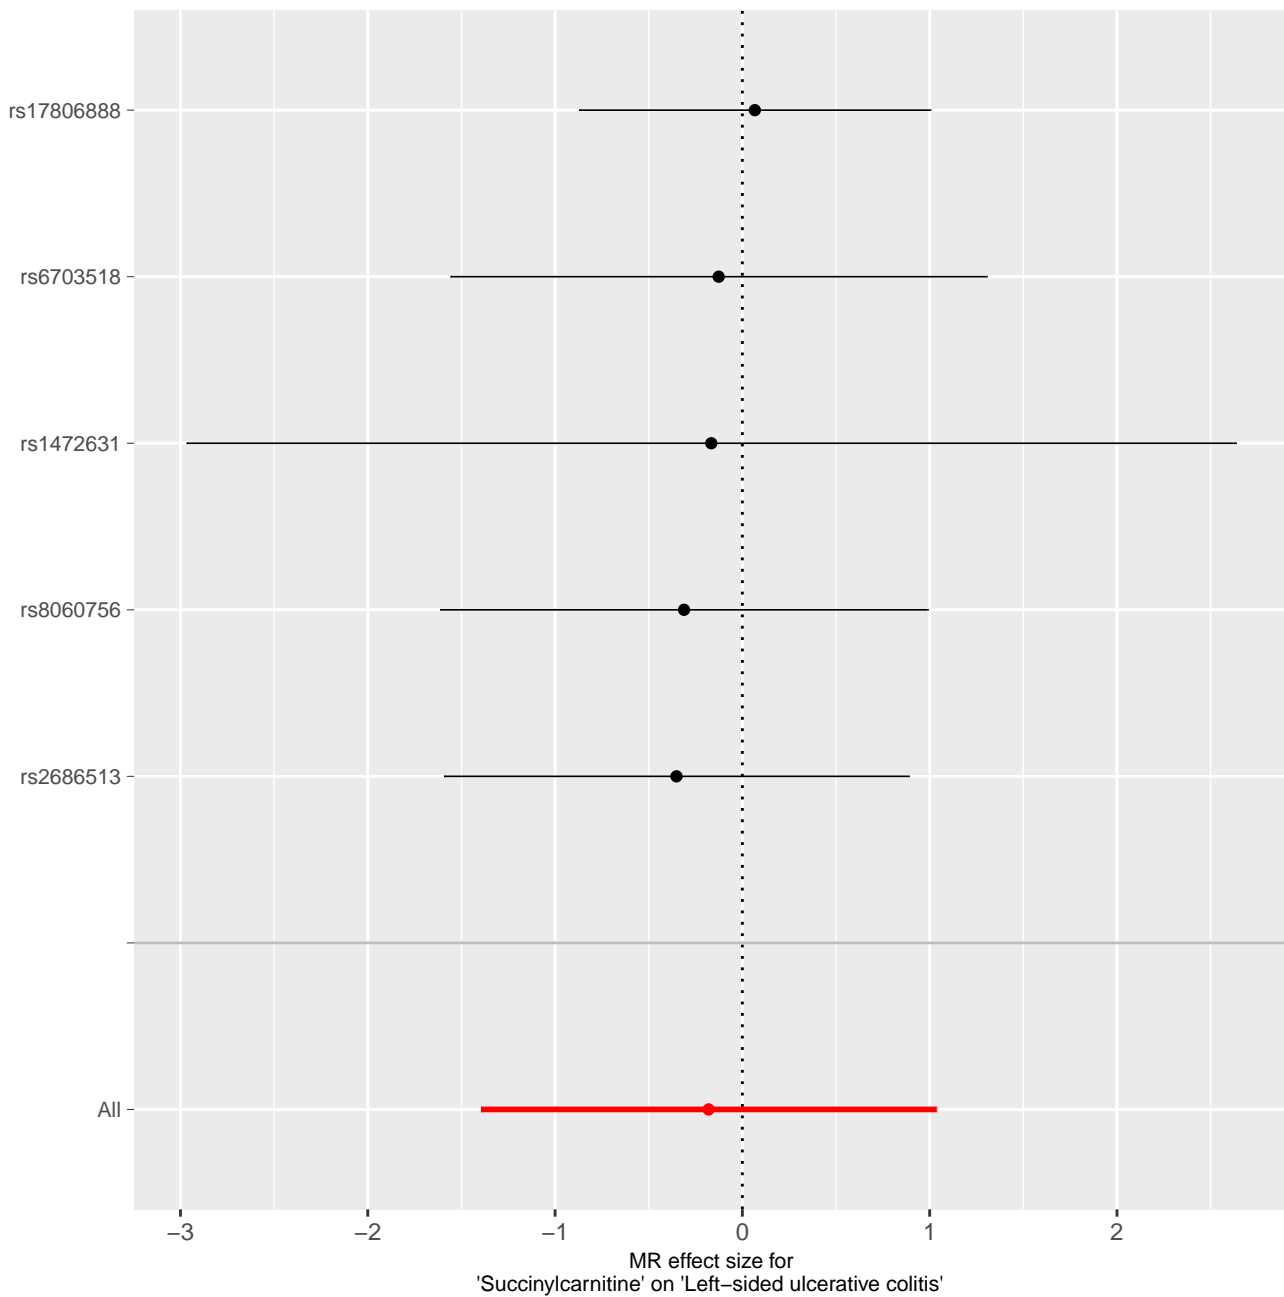

Batch 1640 : Cyclo(leu-pro) on Left-sided ulcerative colitis

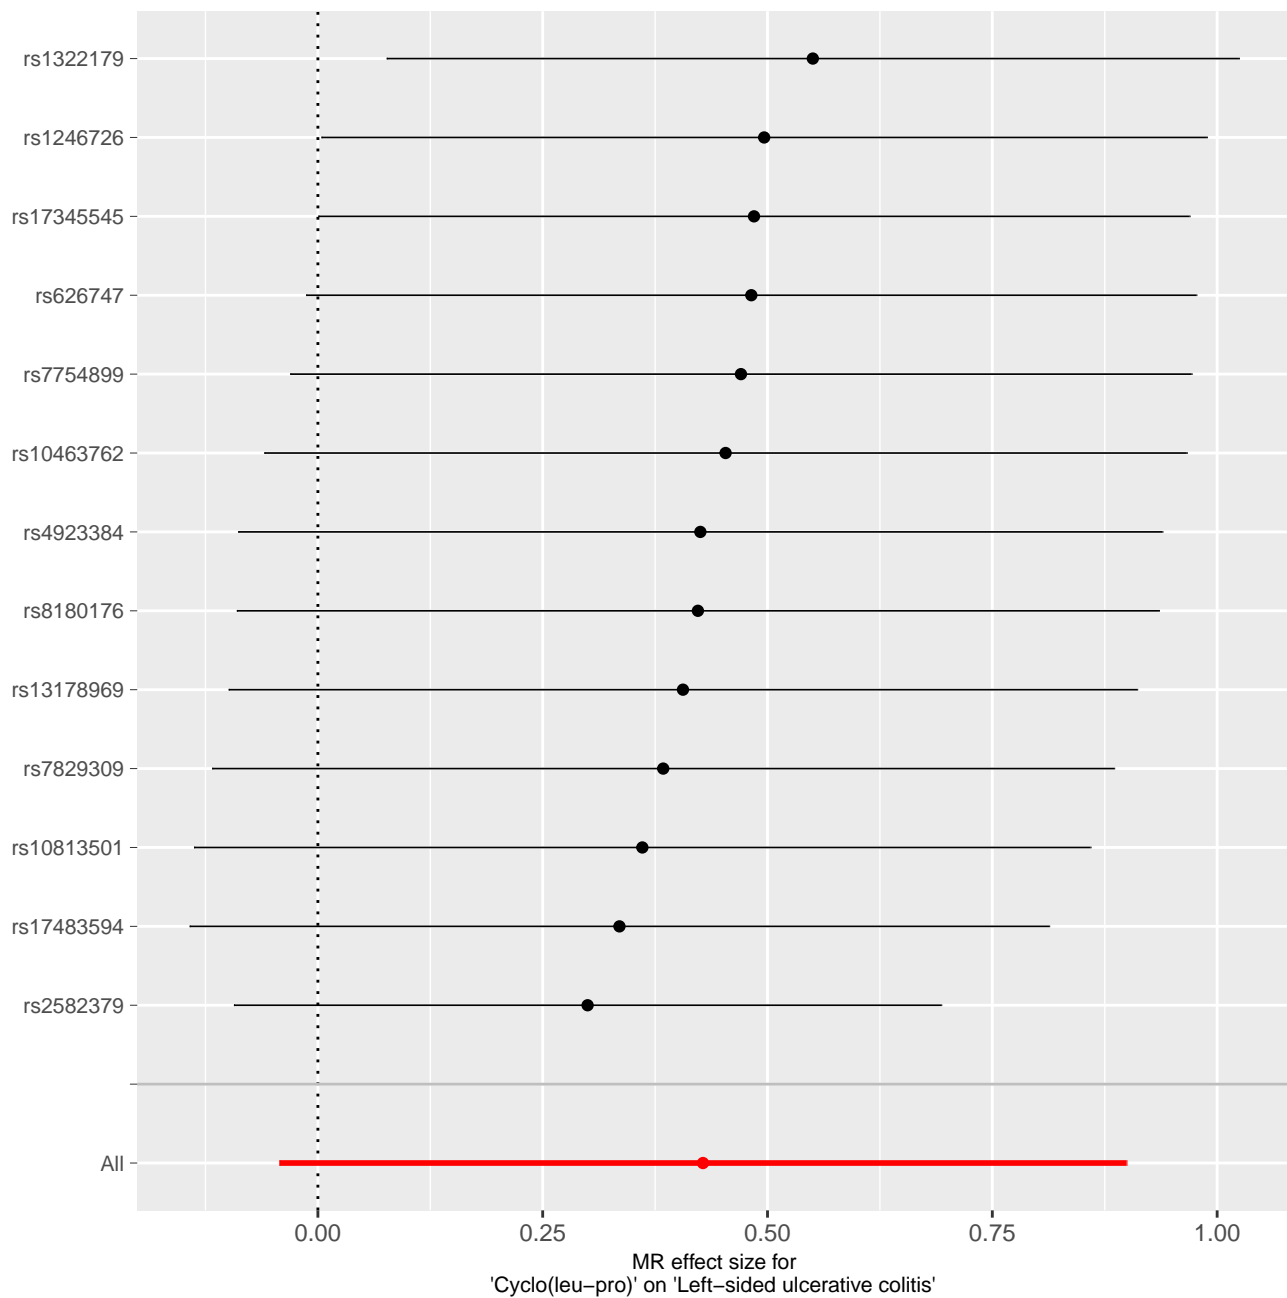



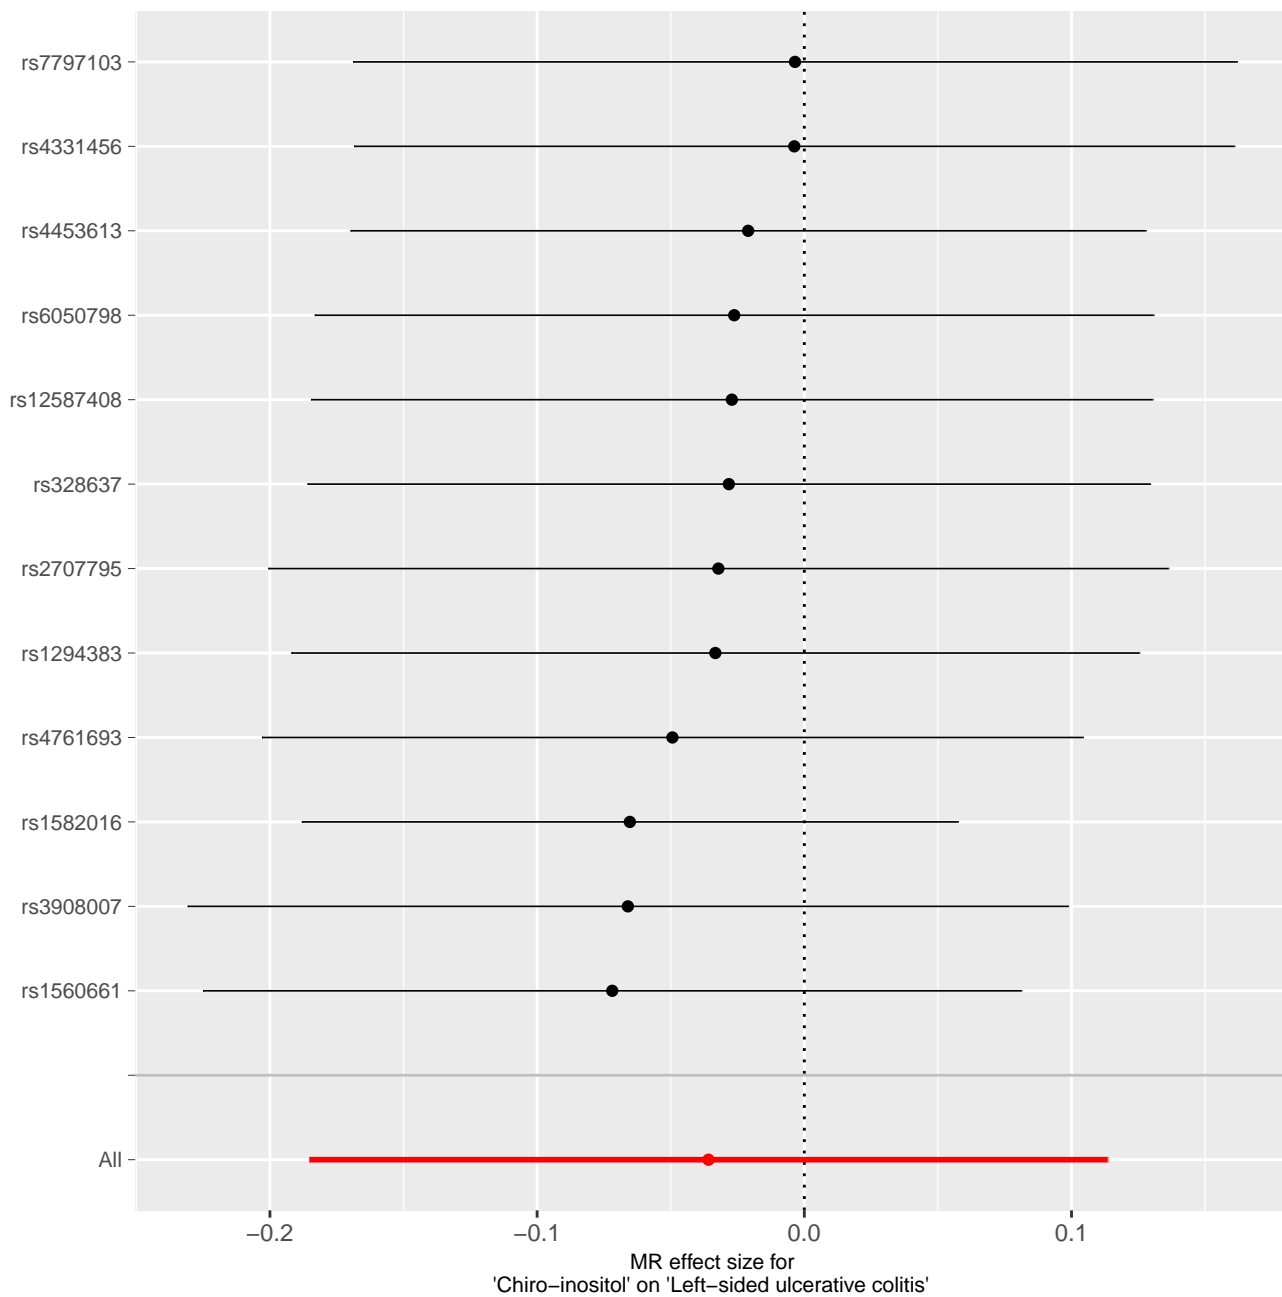

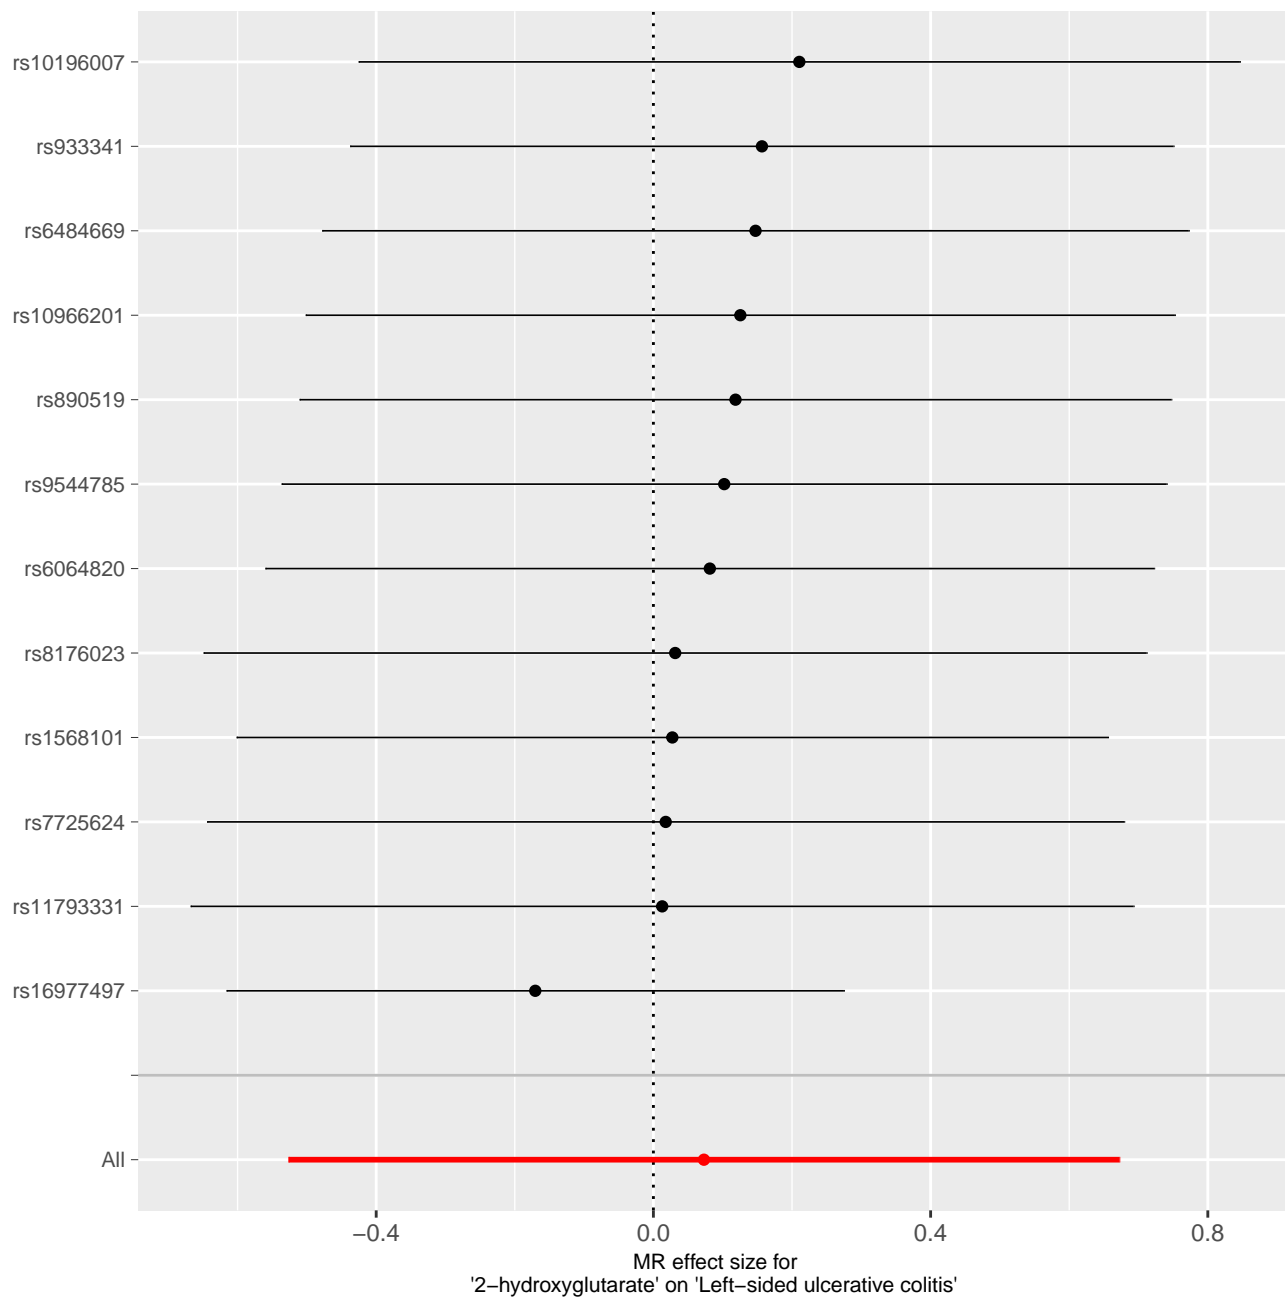

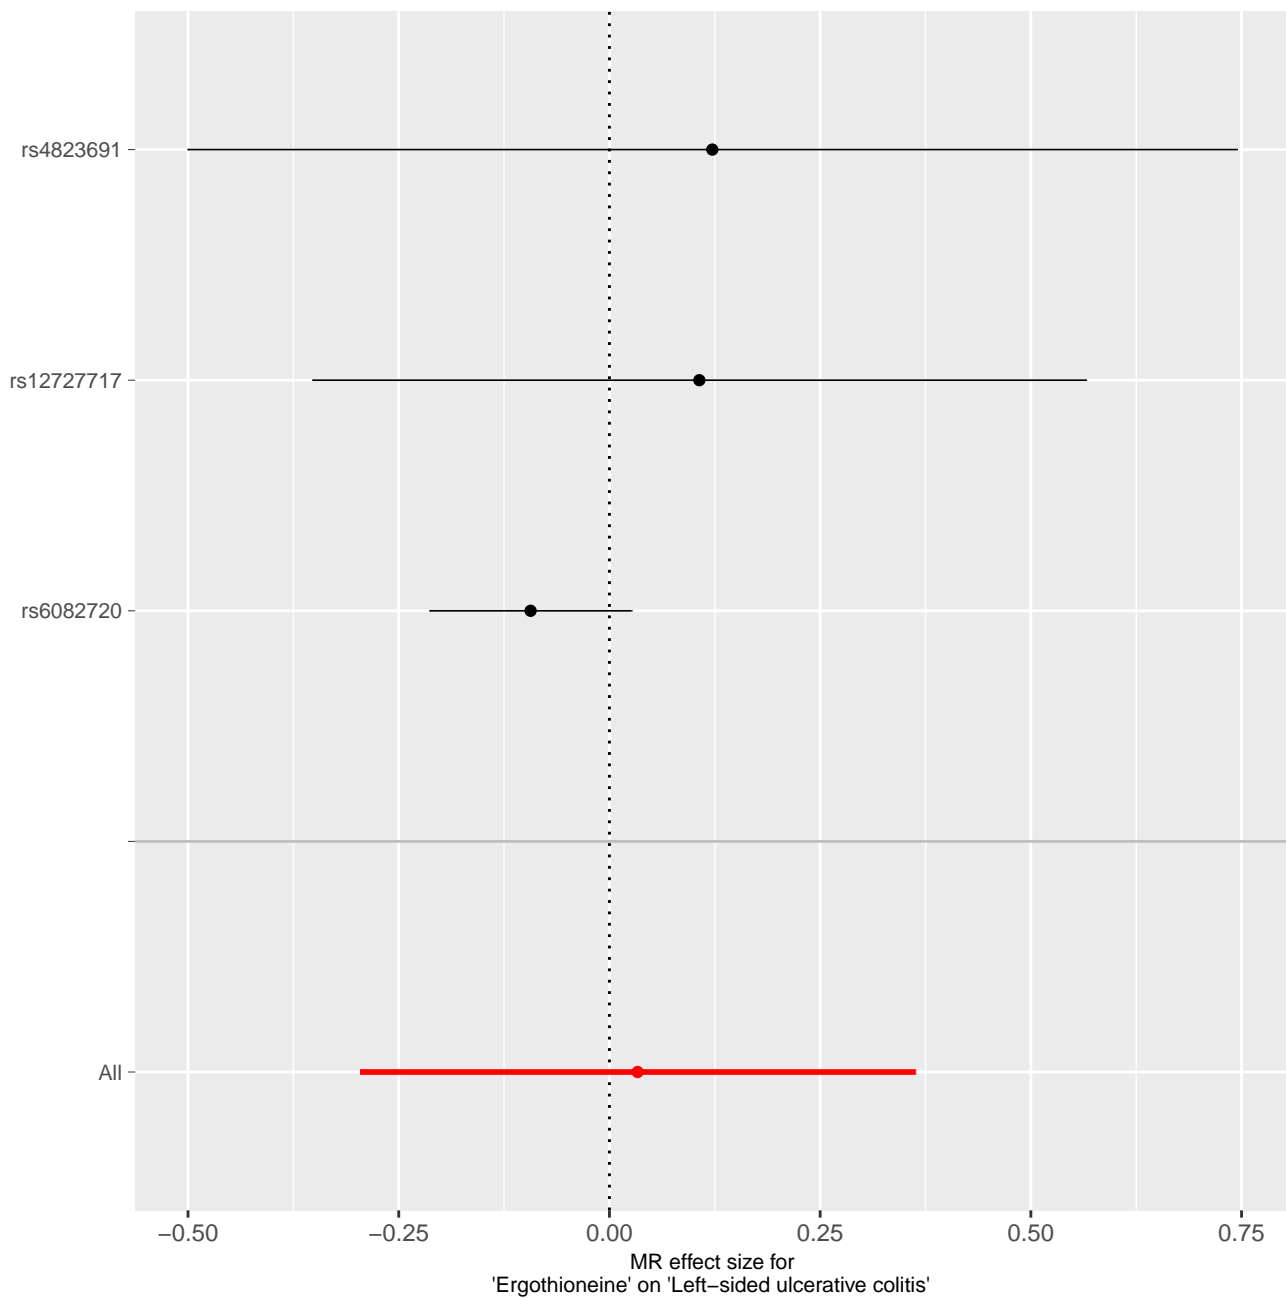

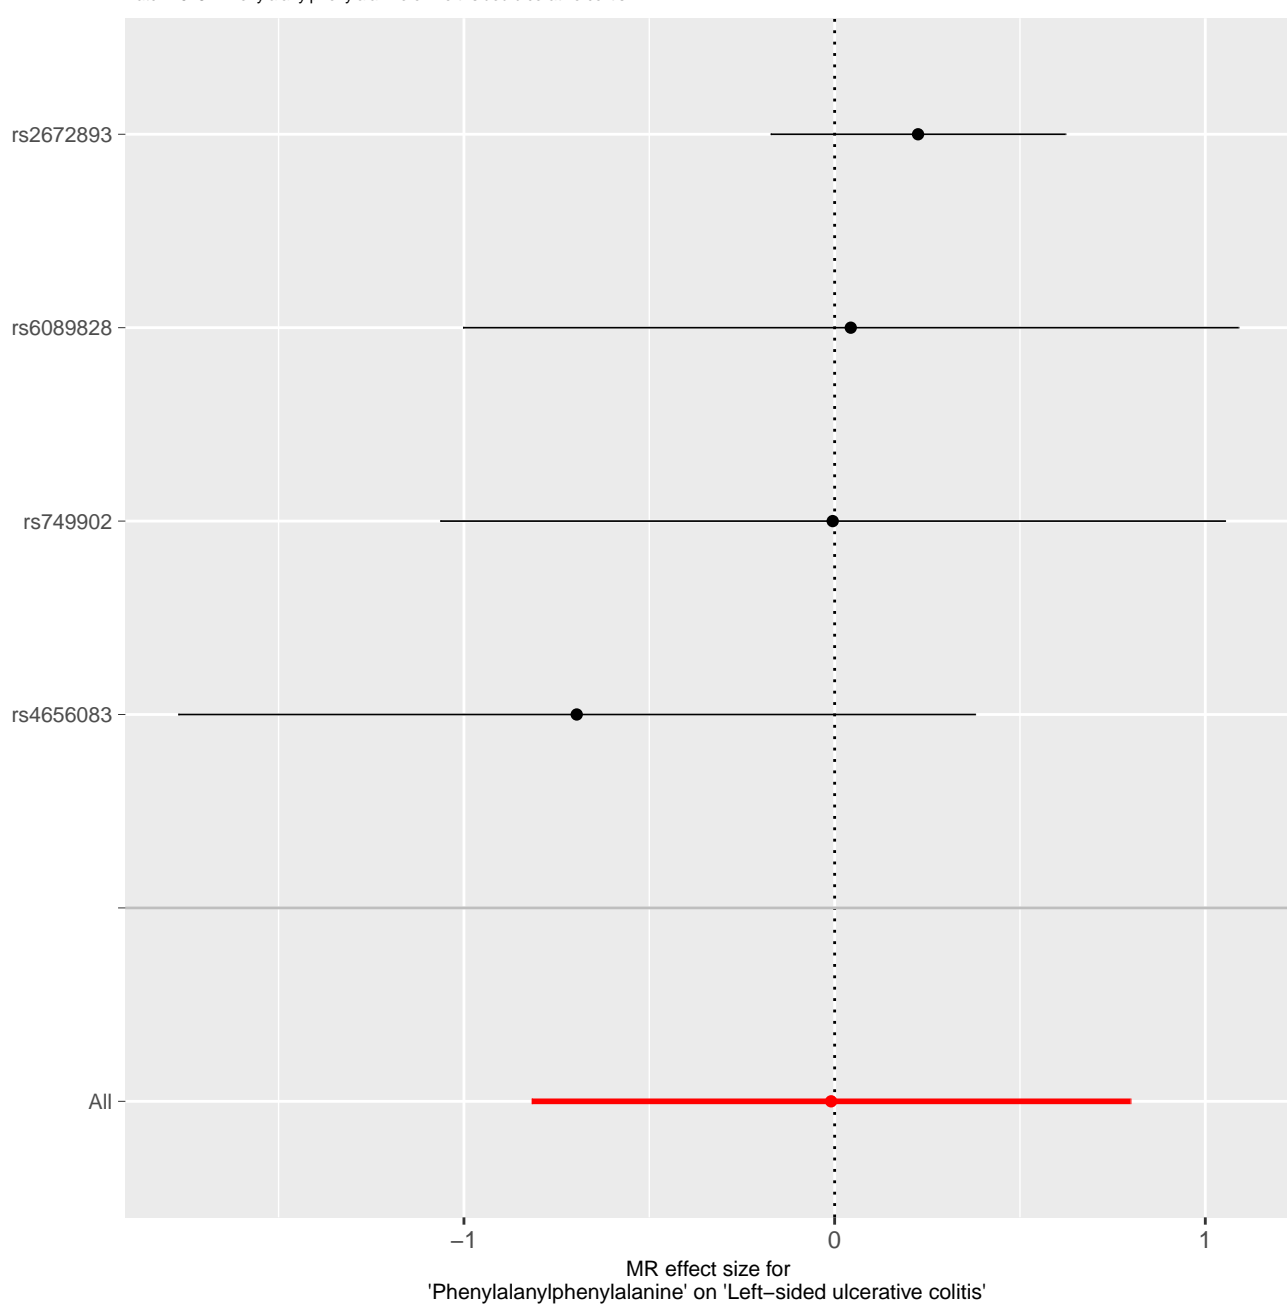

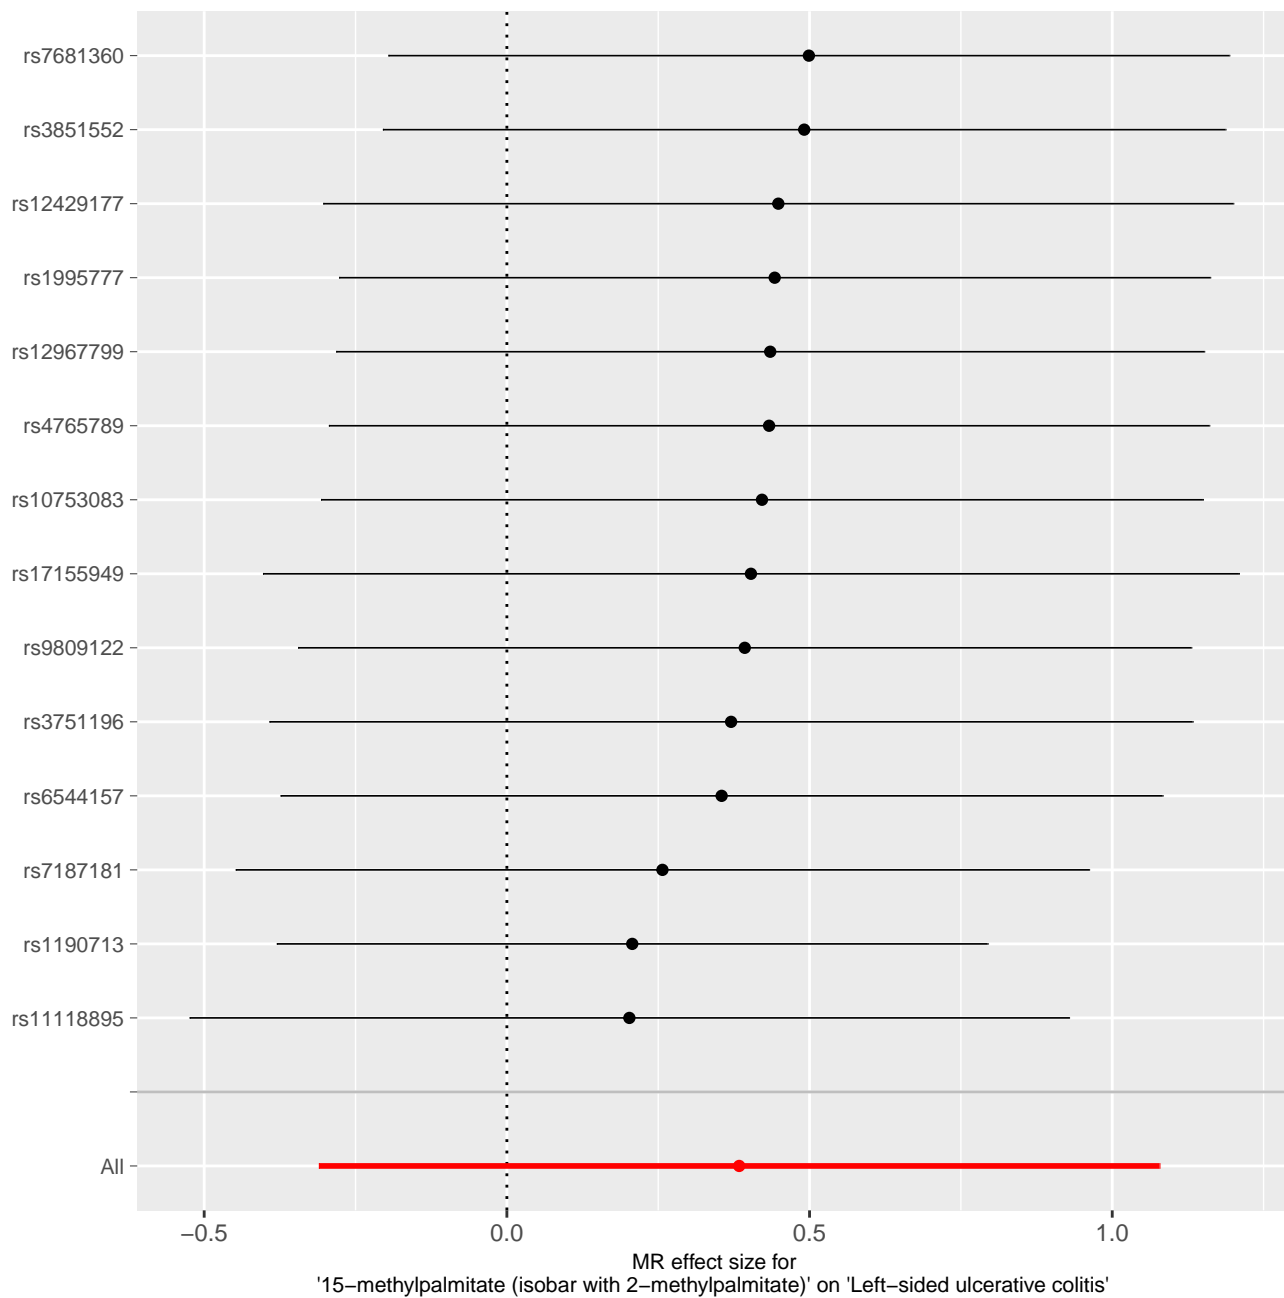

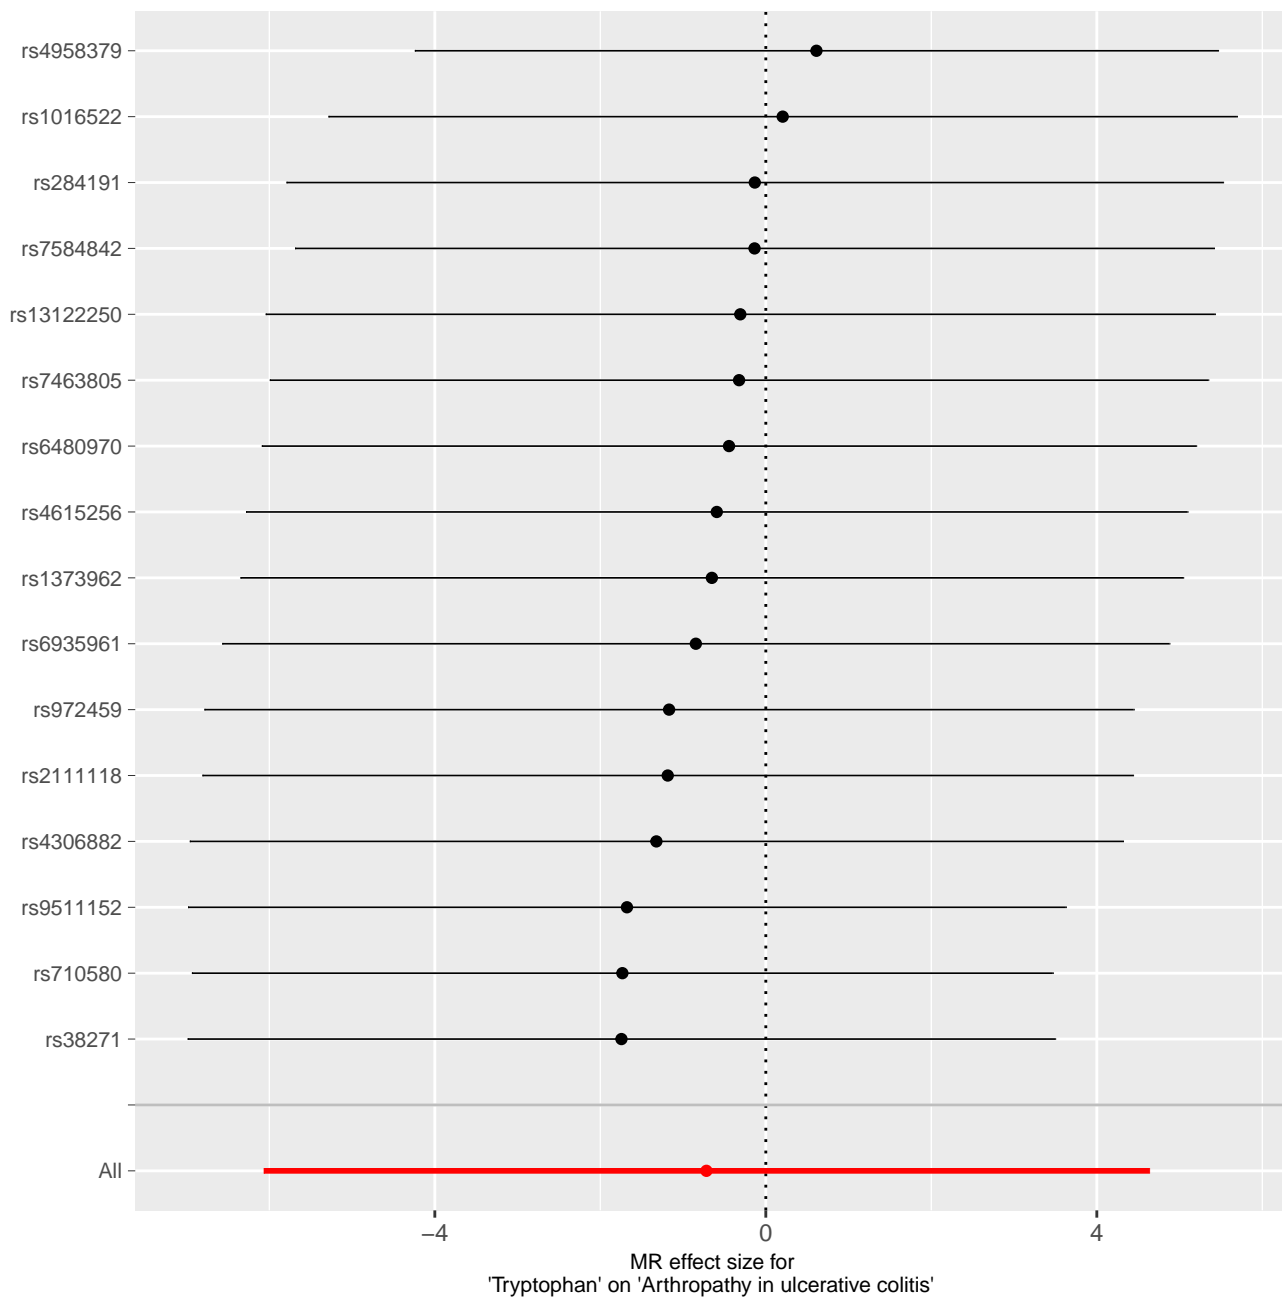

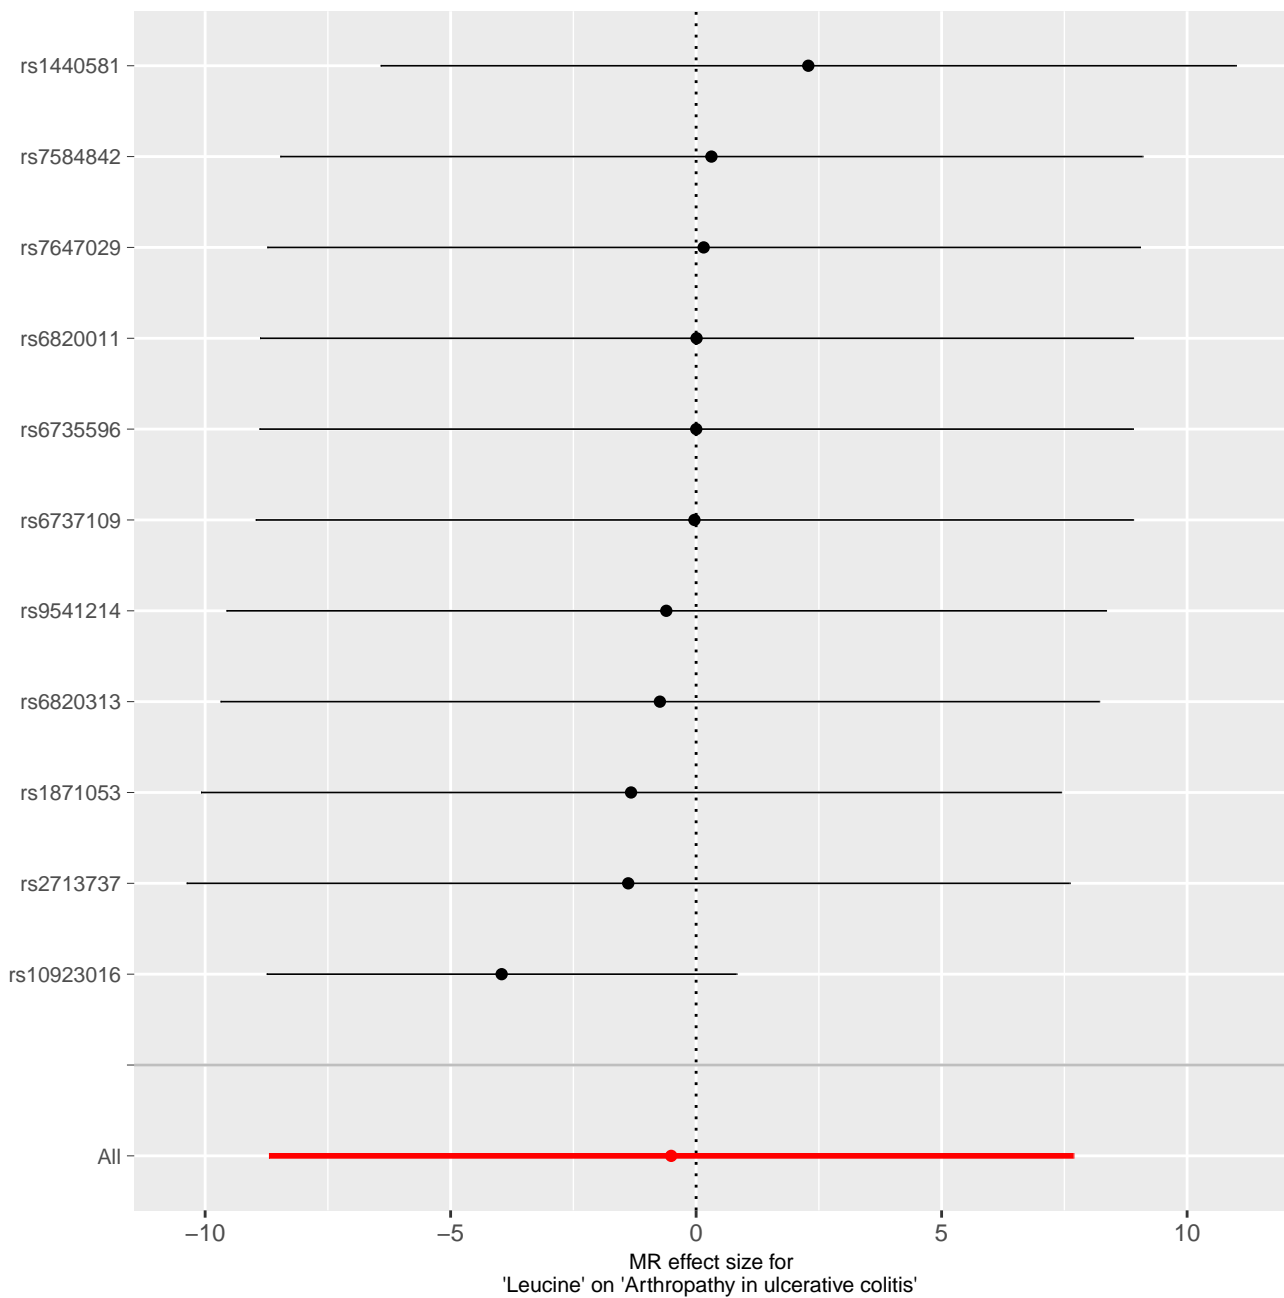

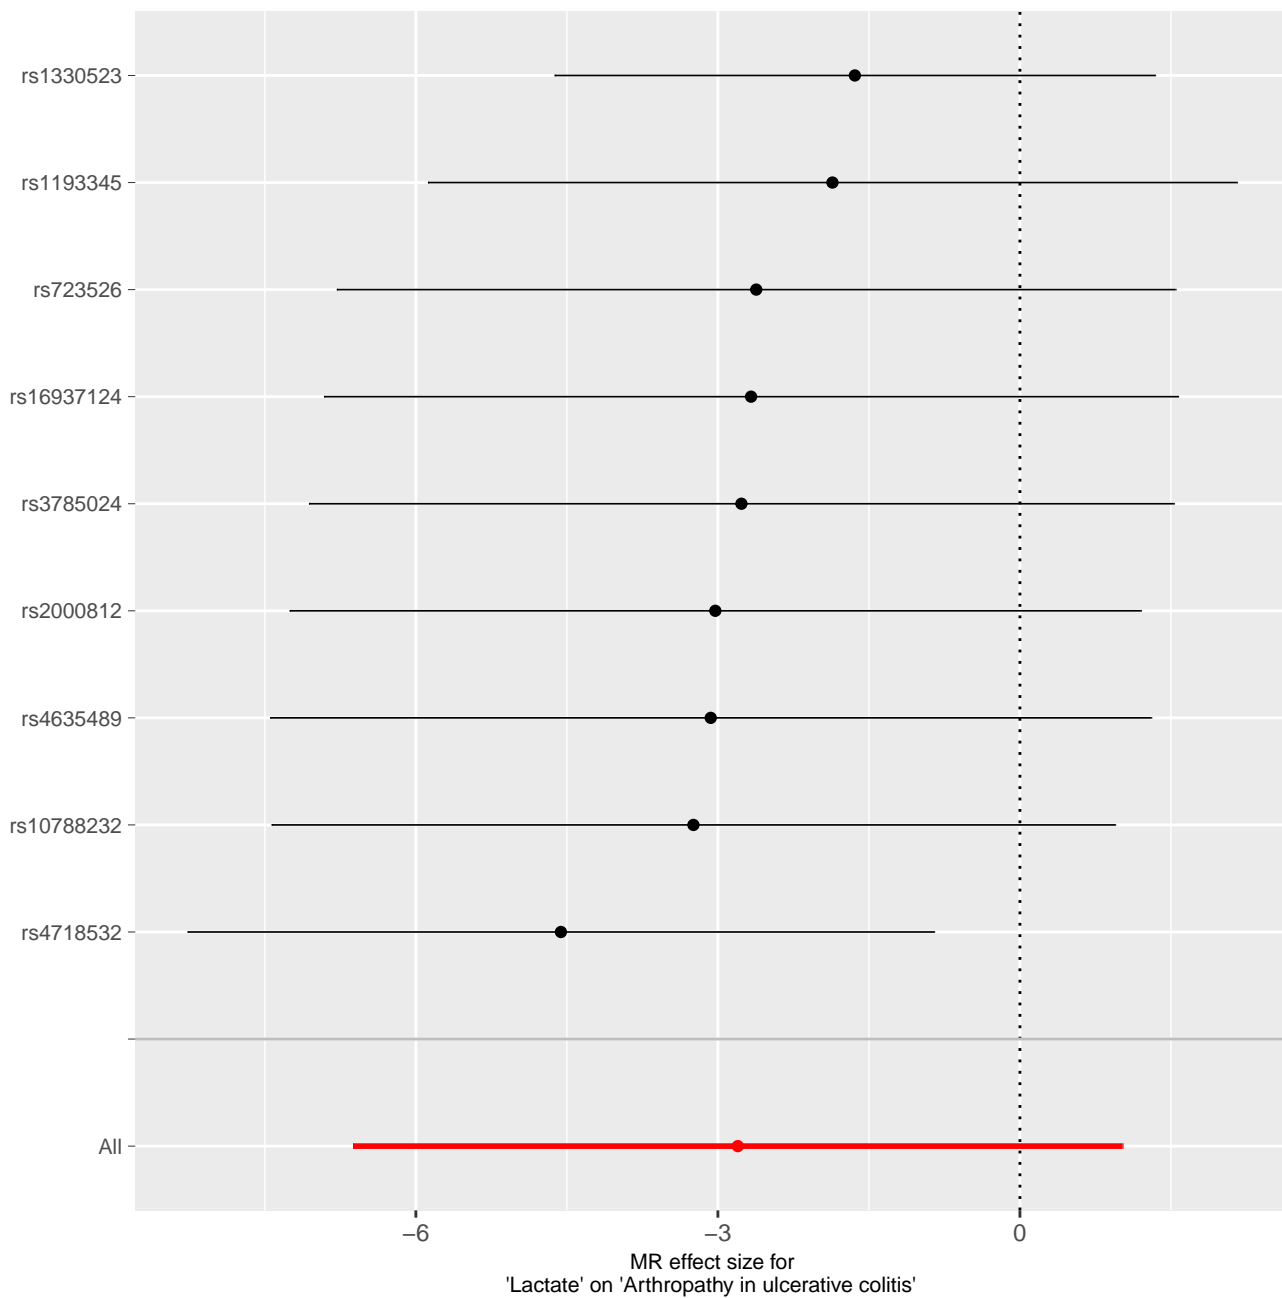



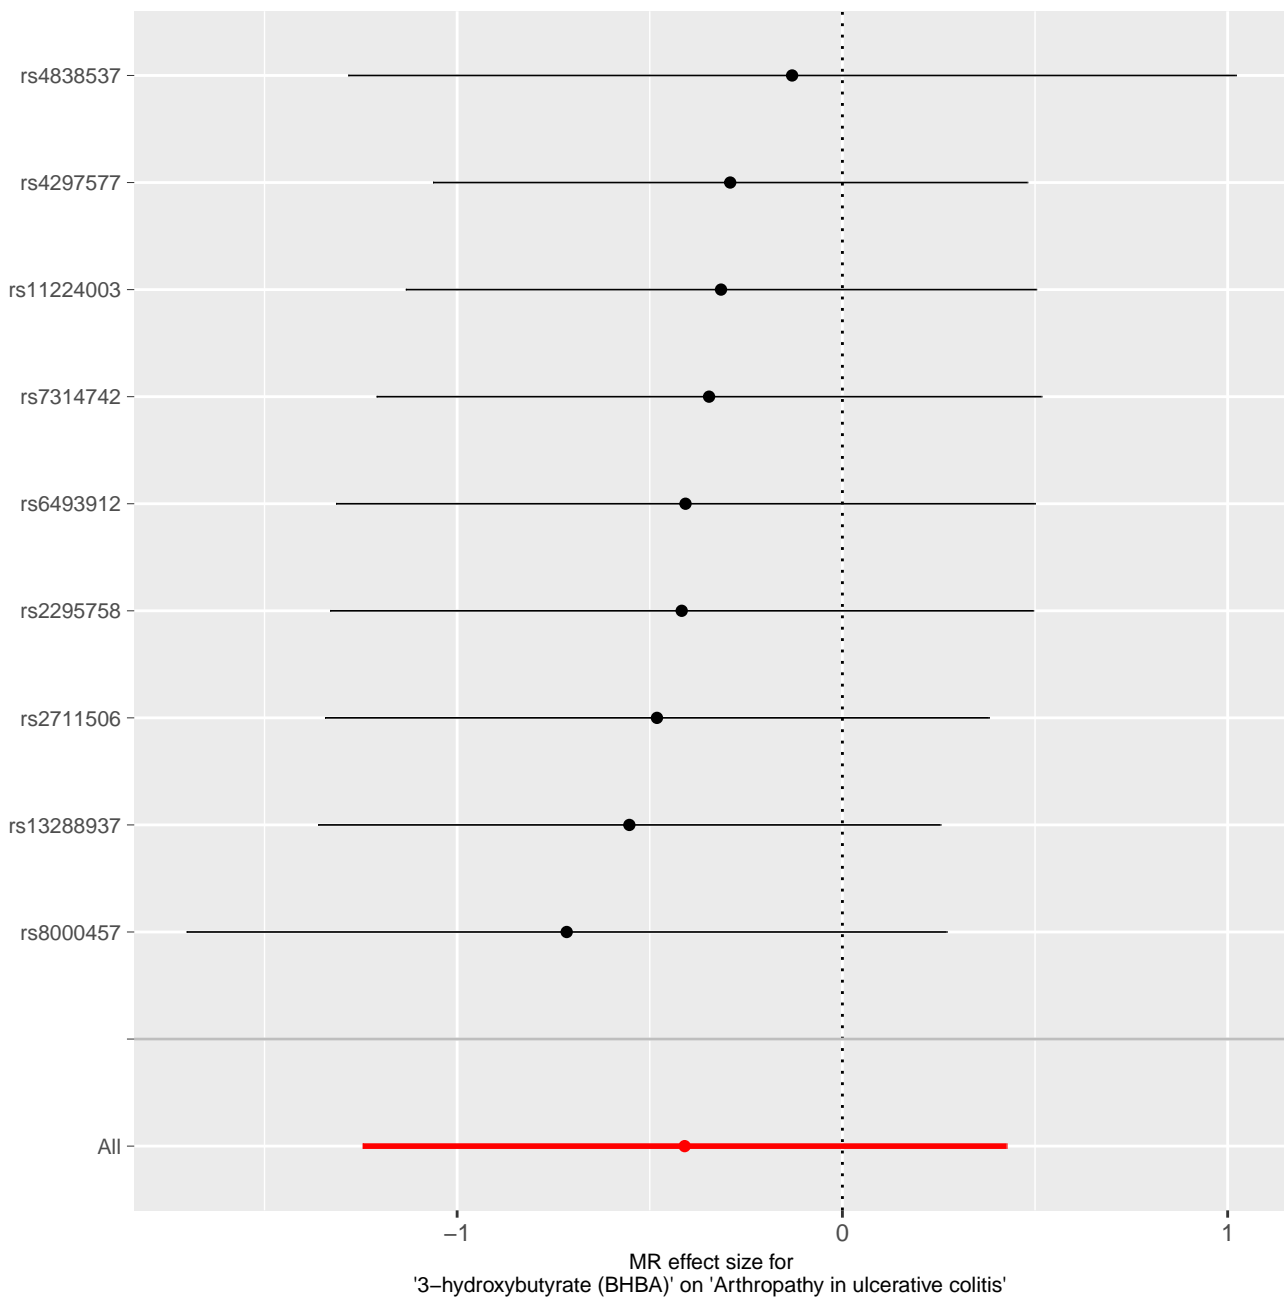

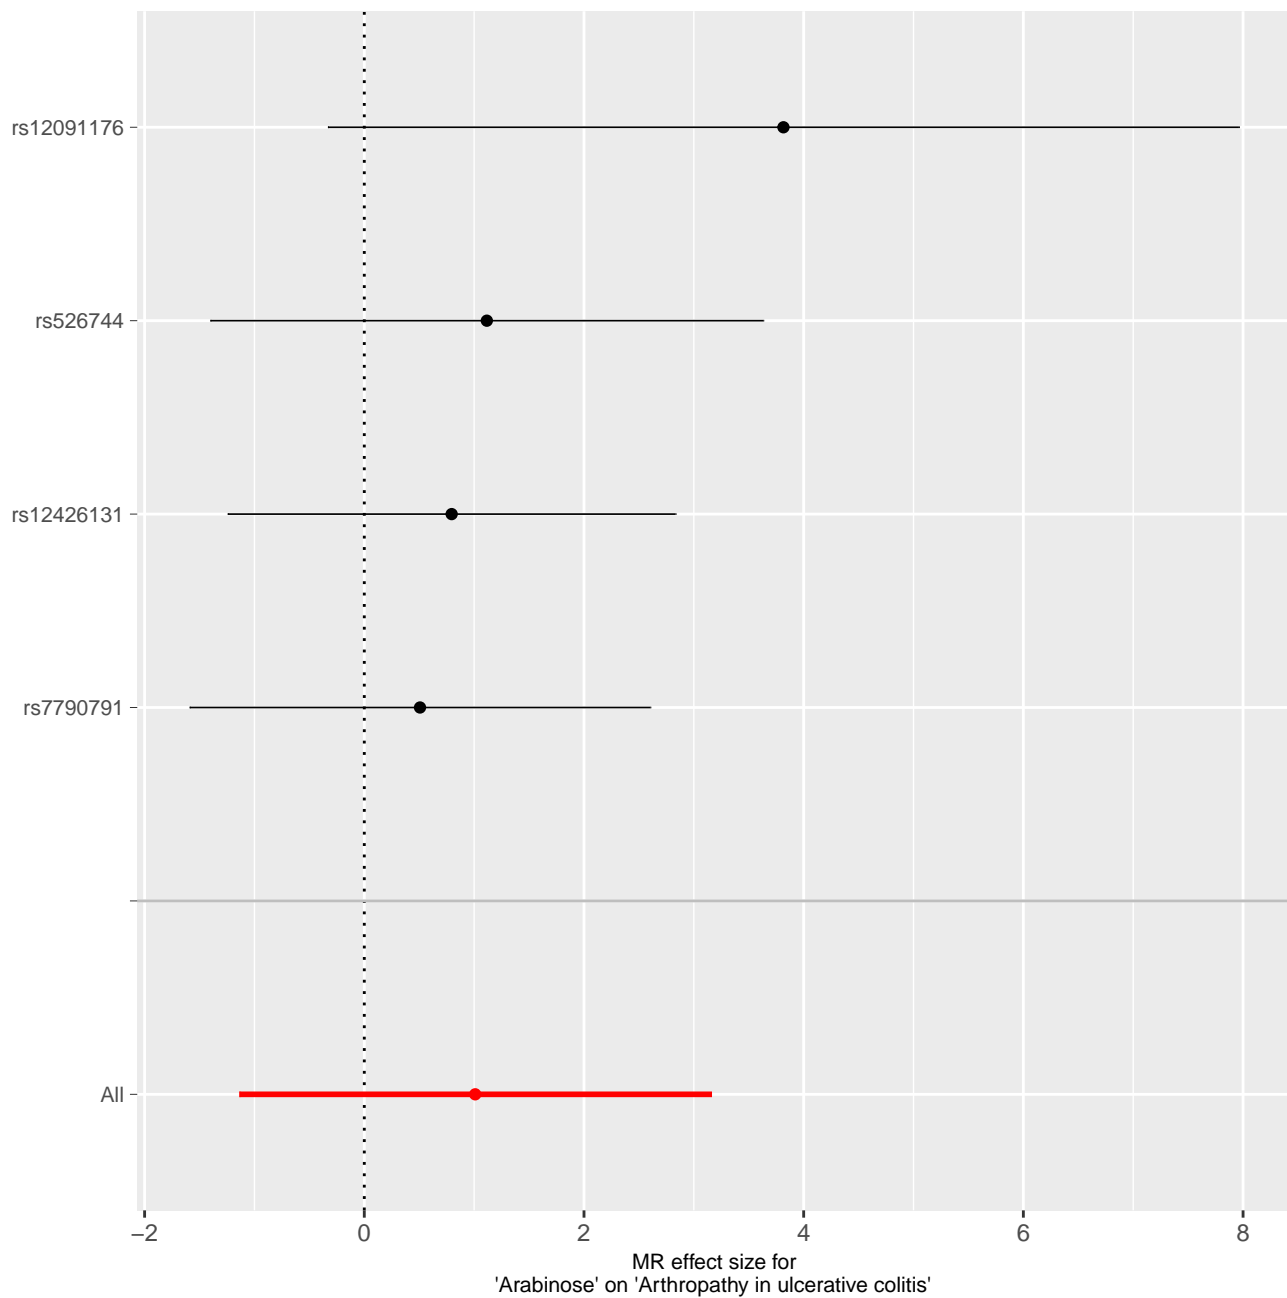

rs2456584

rs661454

rs4663119

All

0

5

MR effect size for  
'Fructose' on 'Arthropathy in ulcerative colitis'

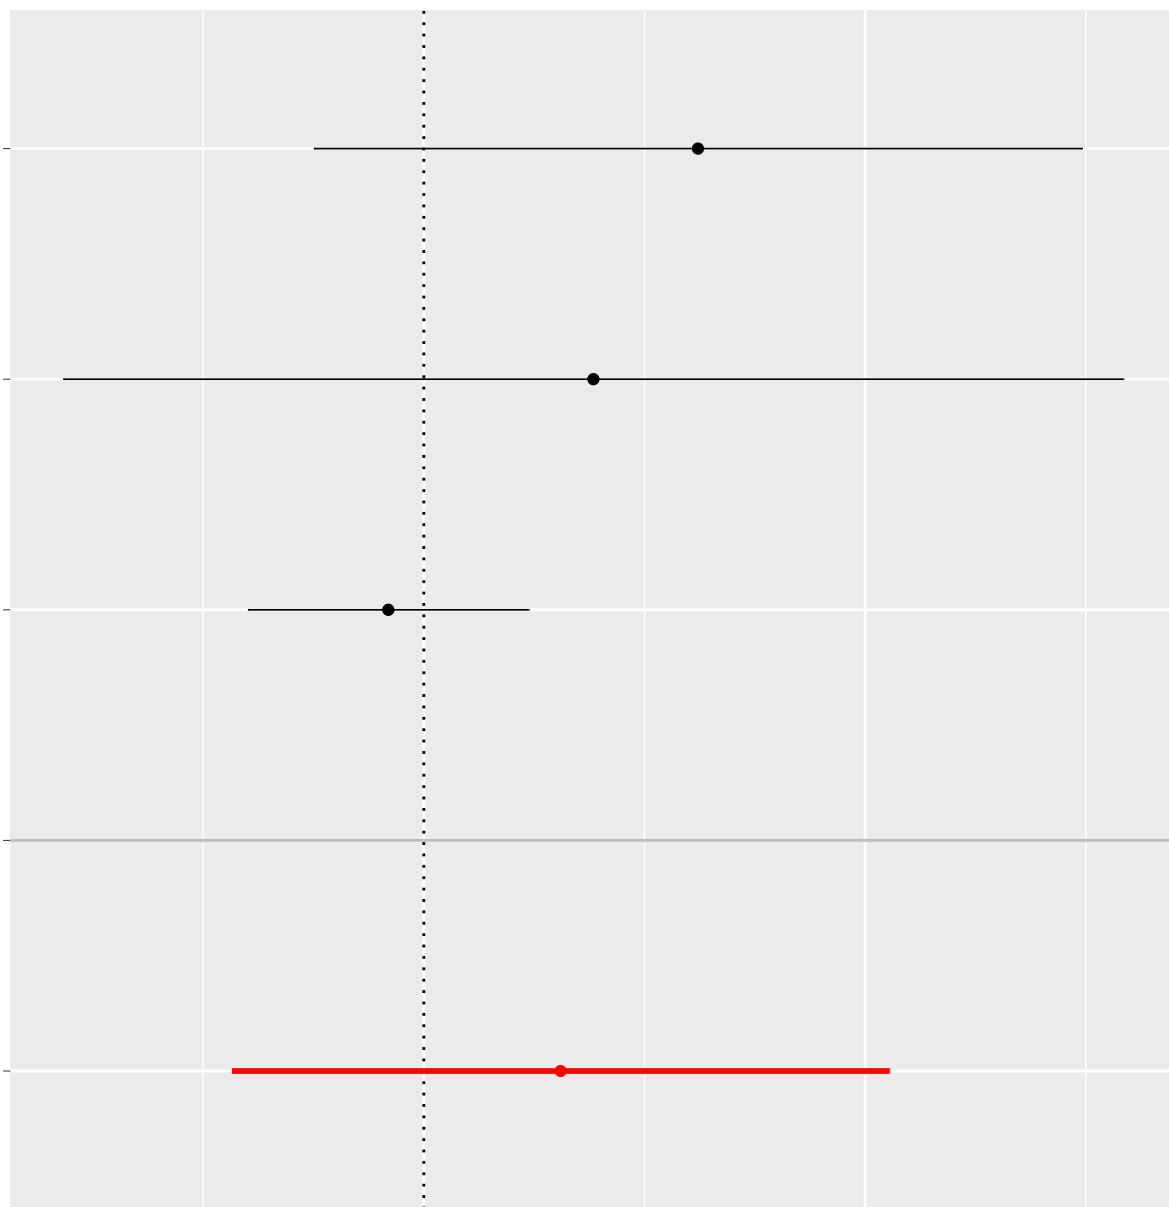

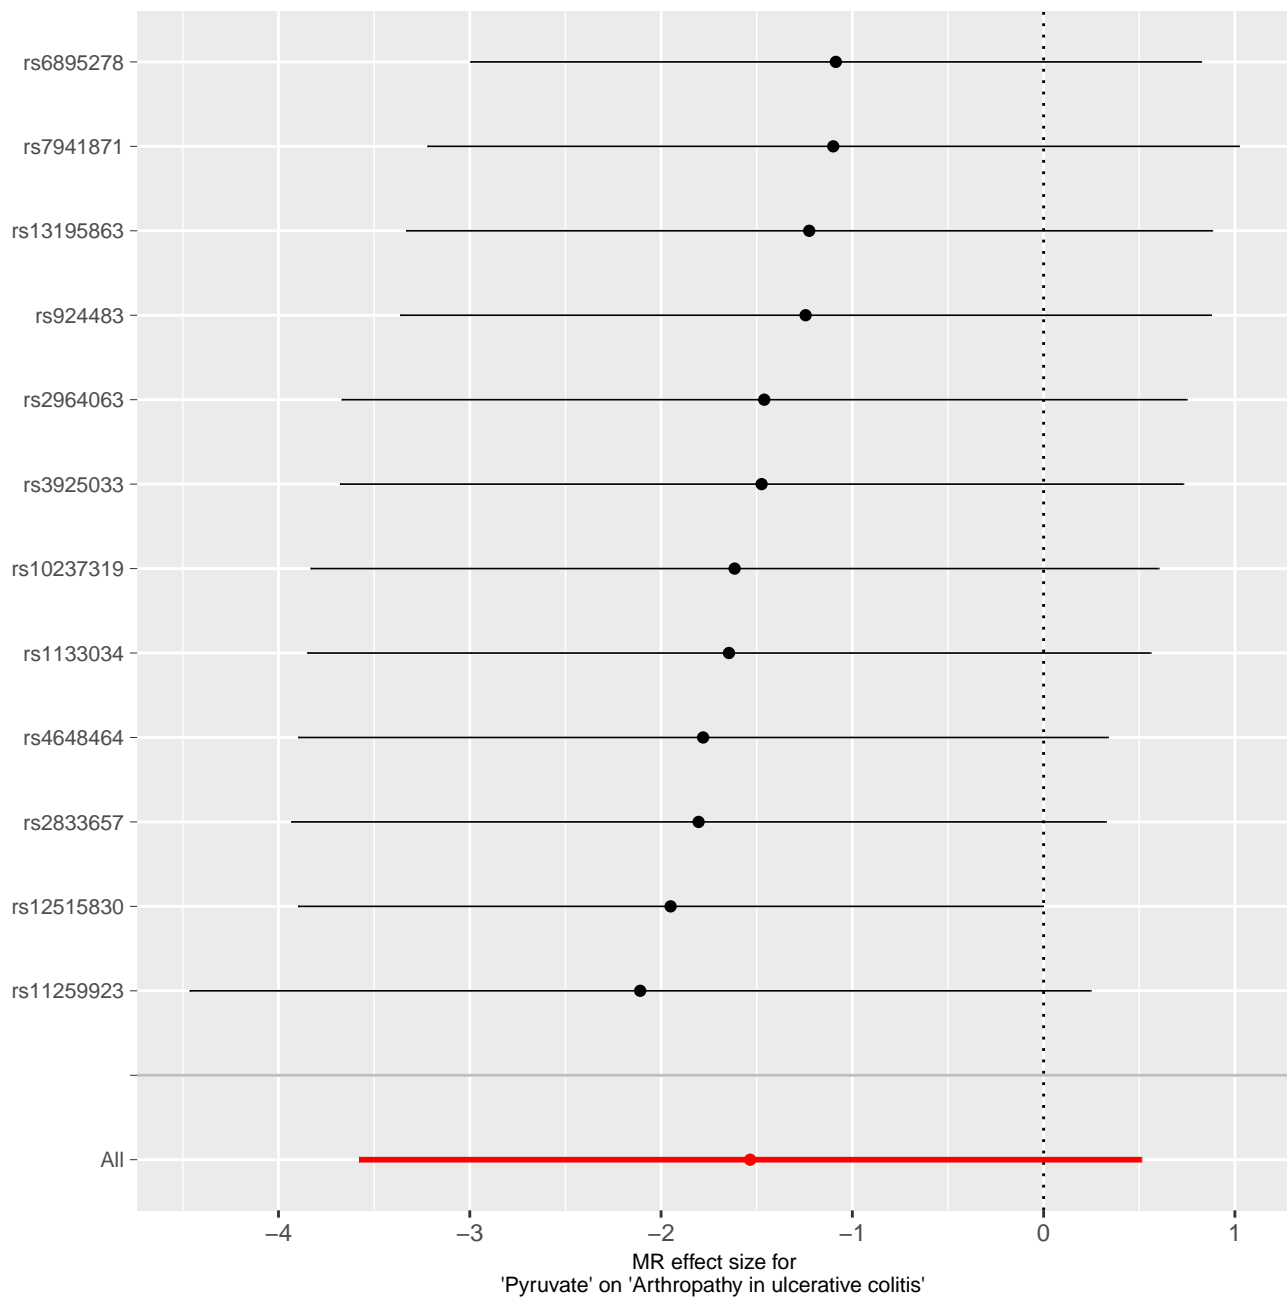

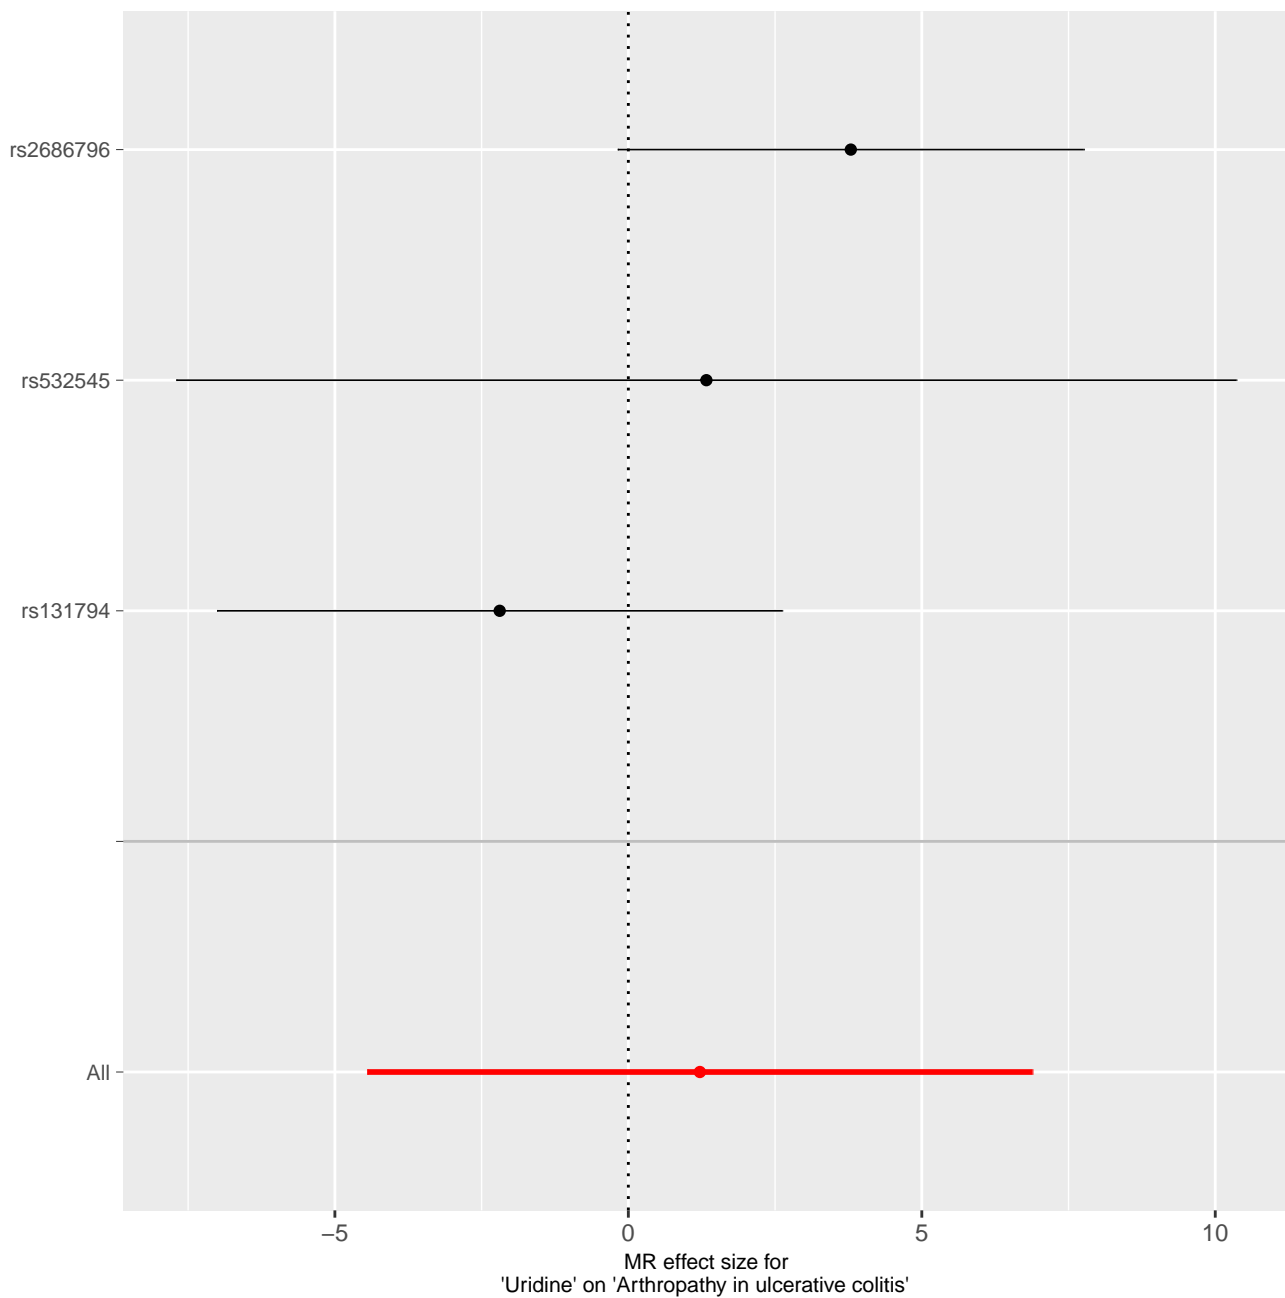

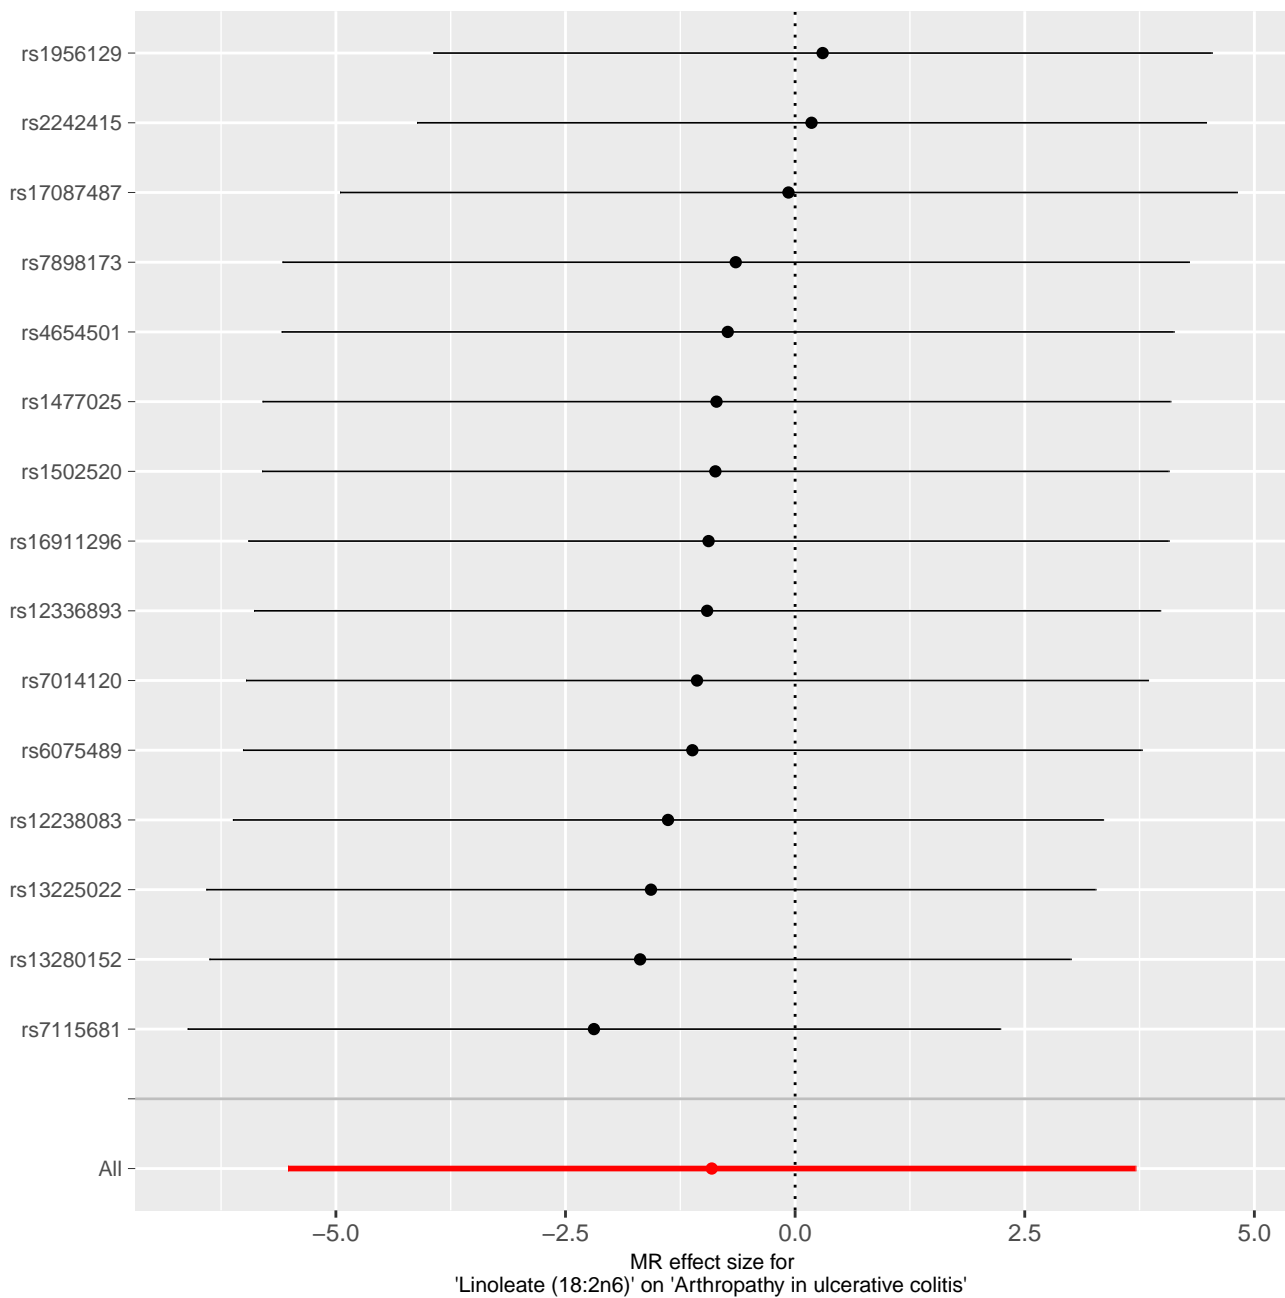

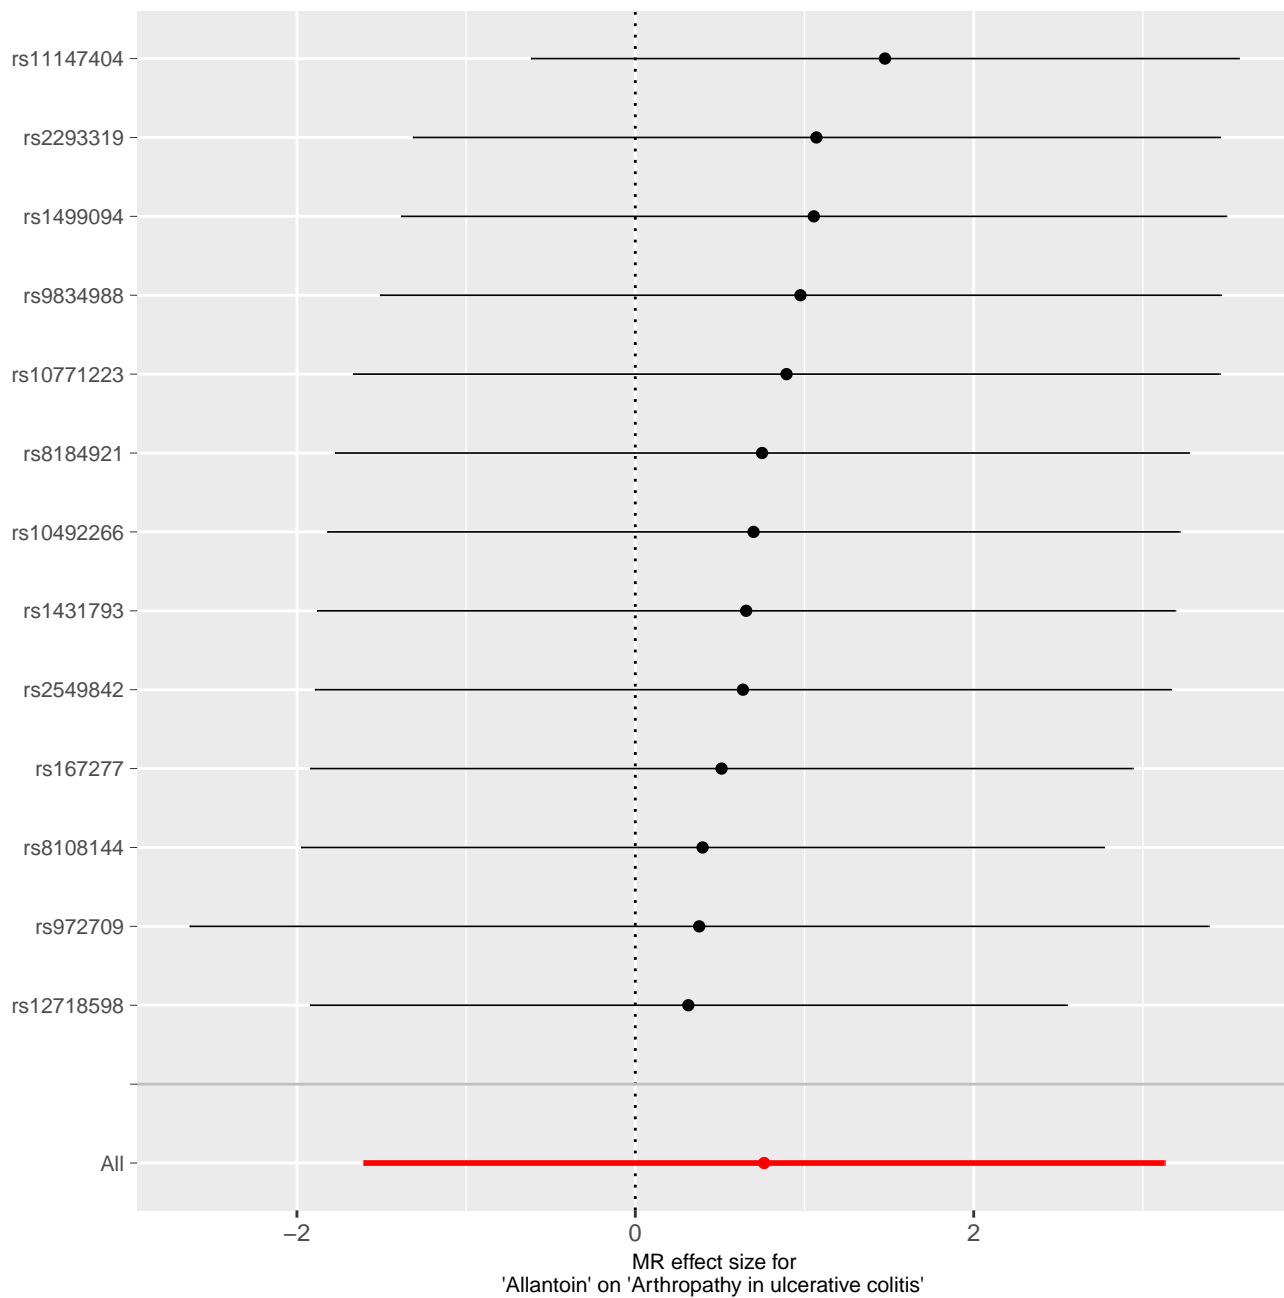

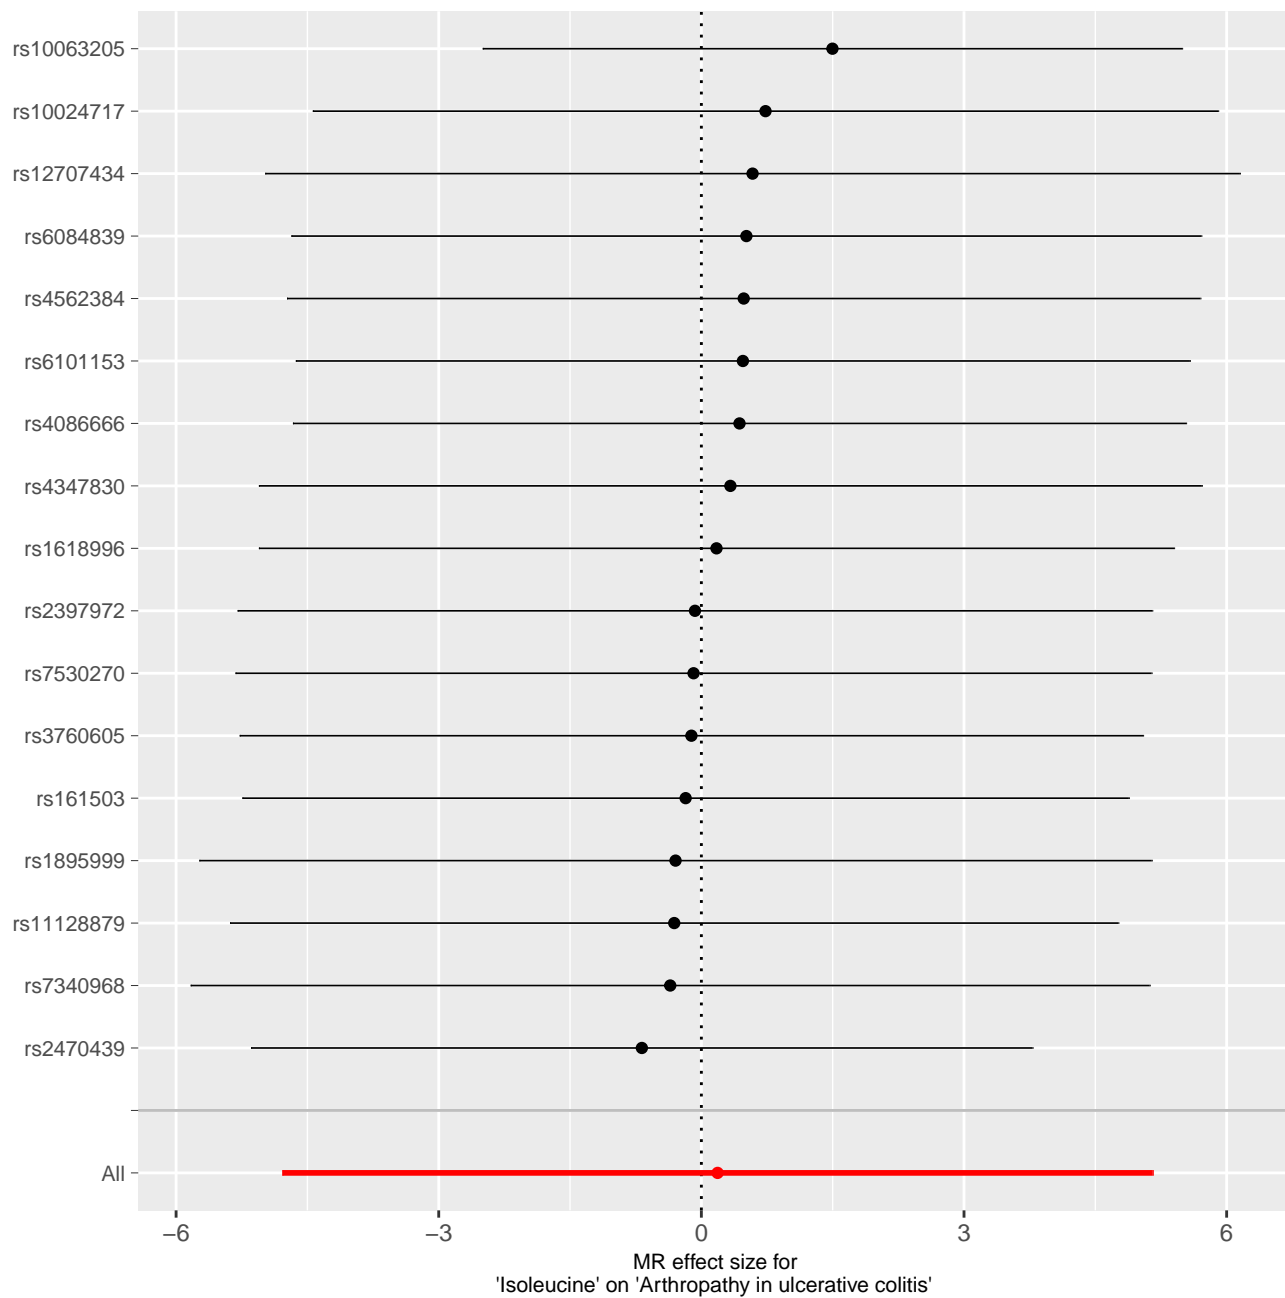



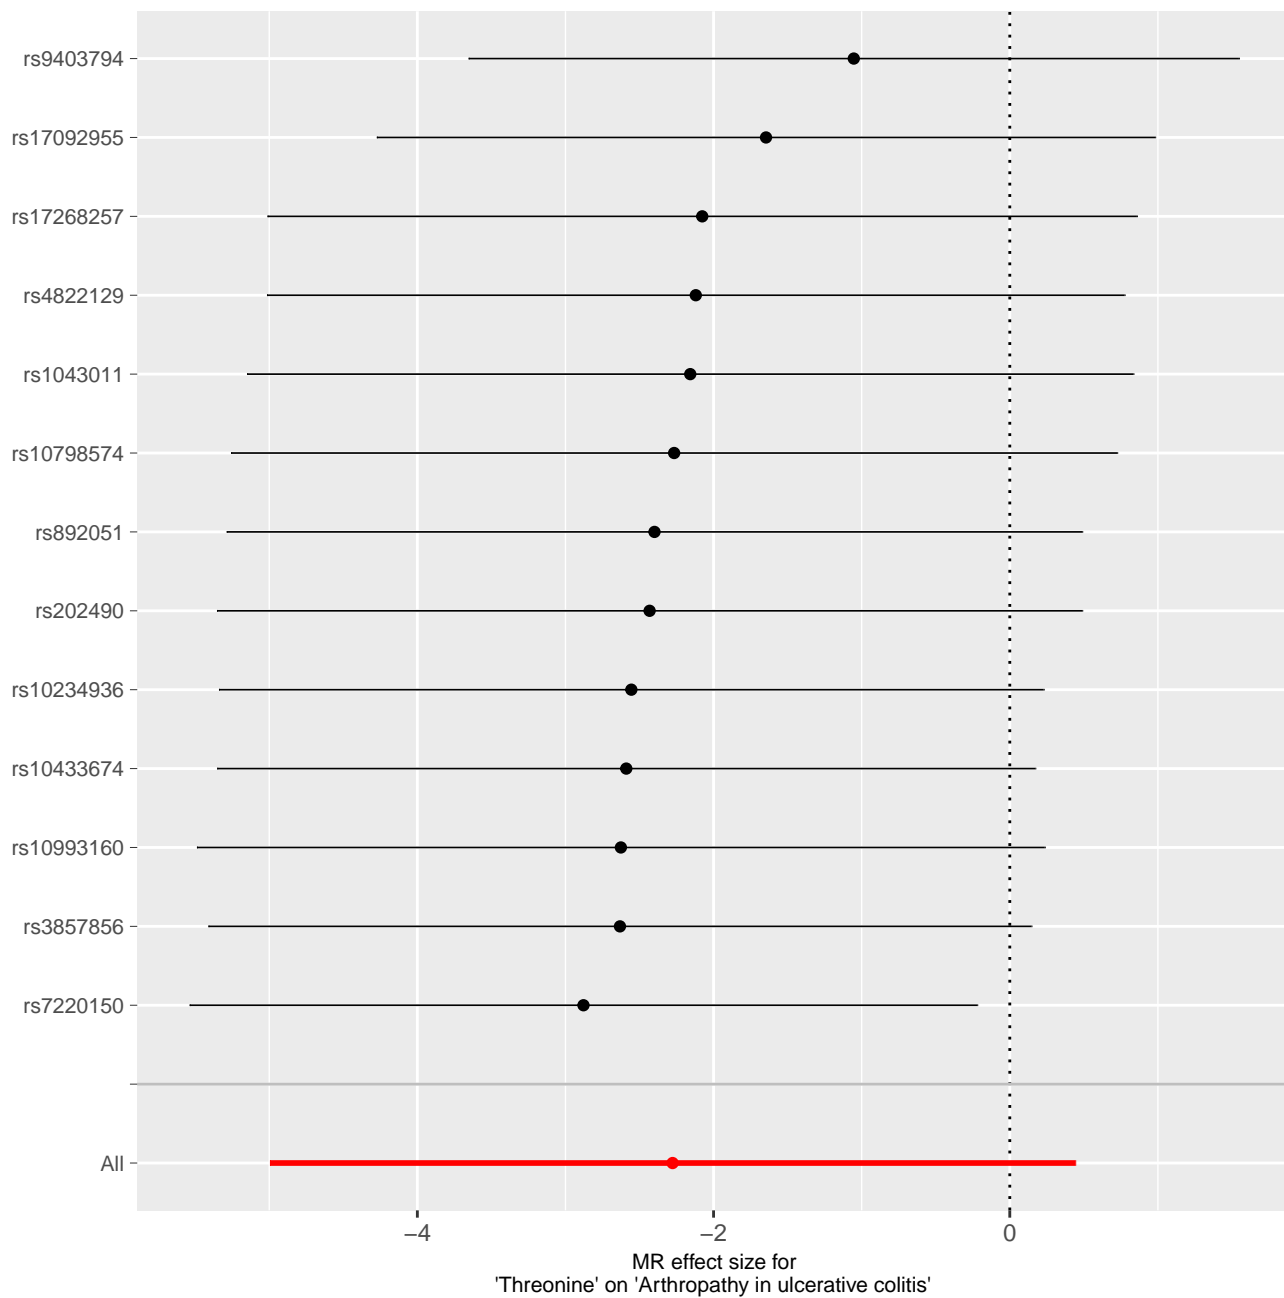

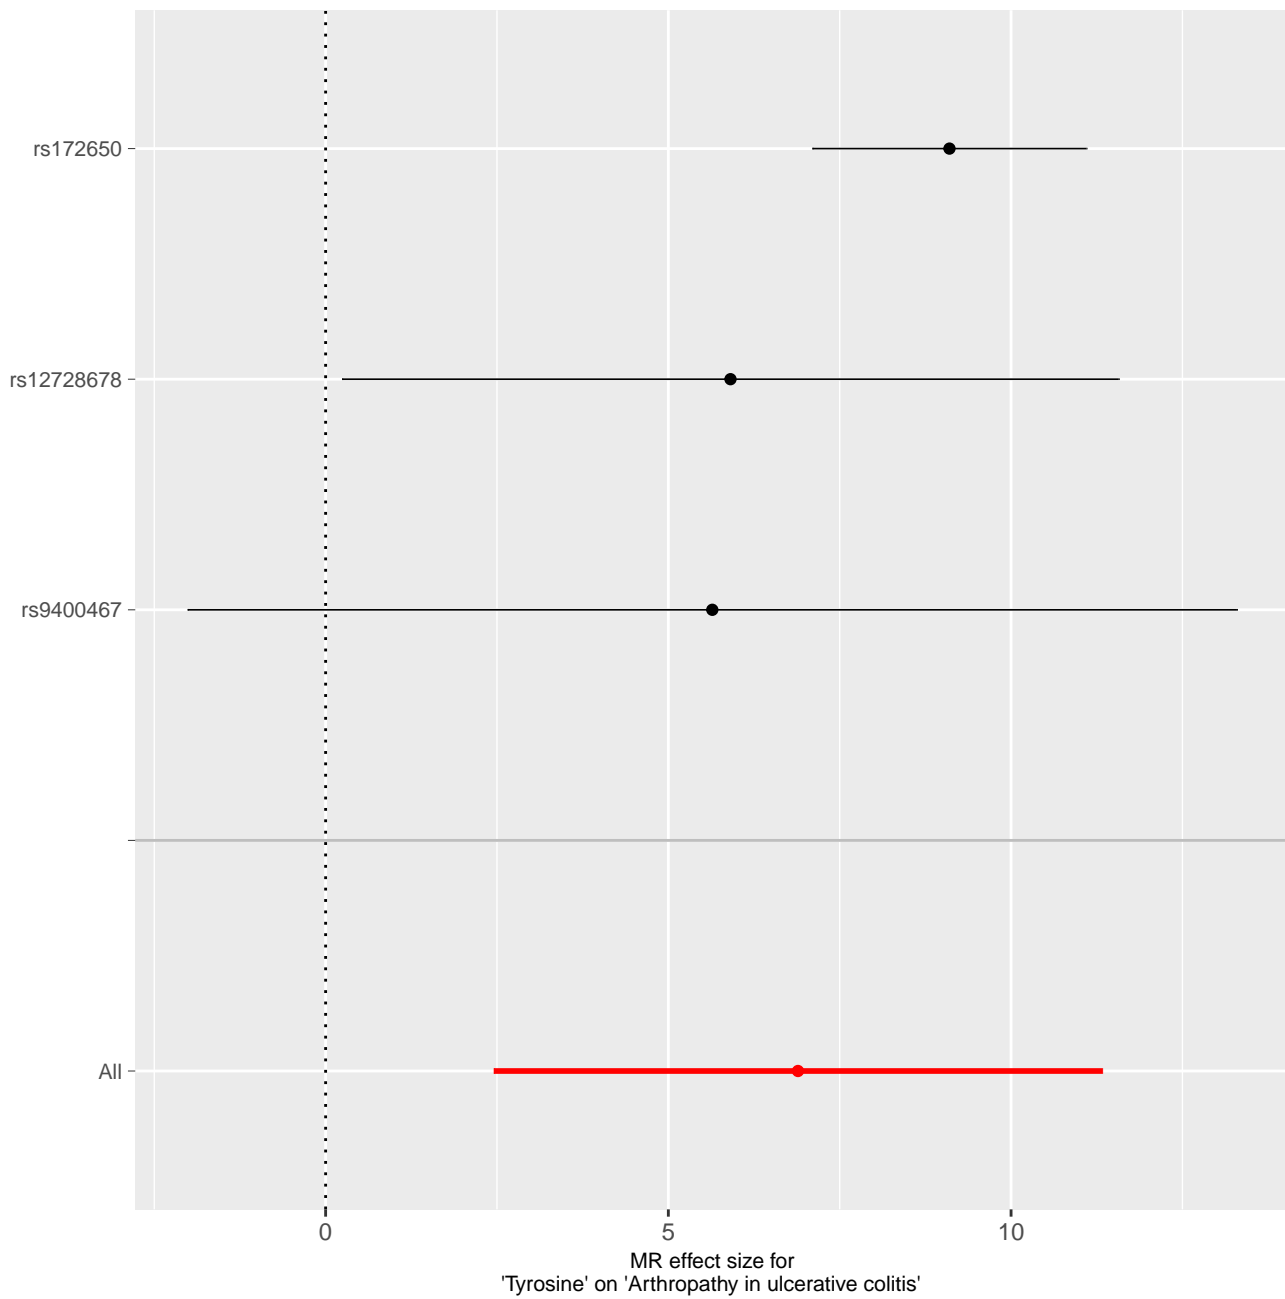

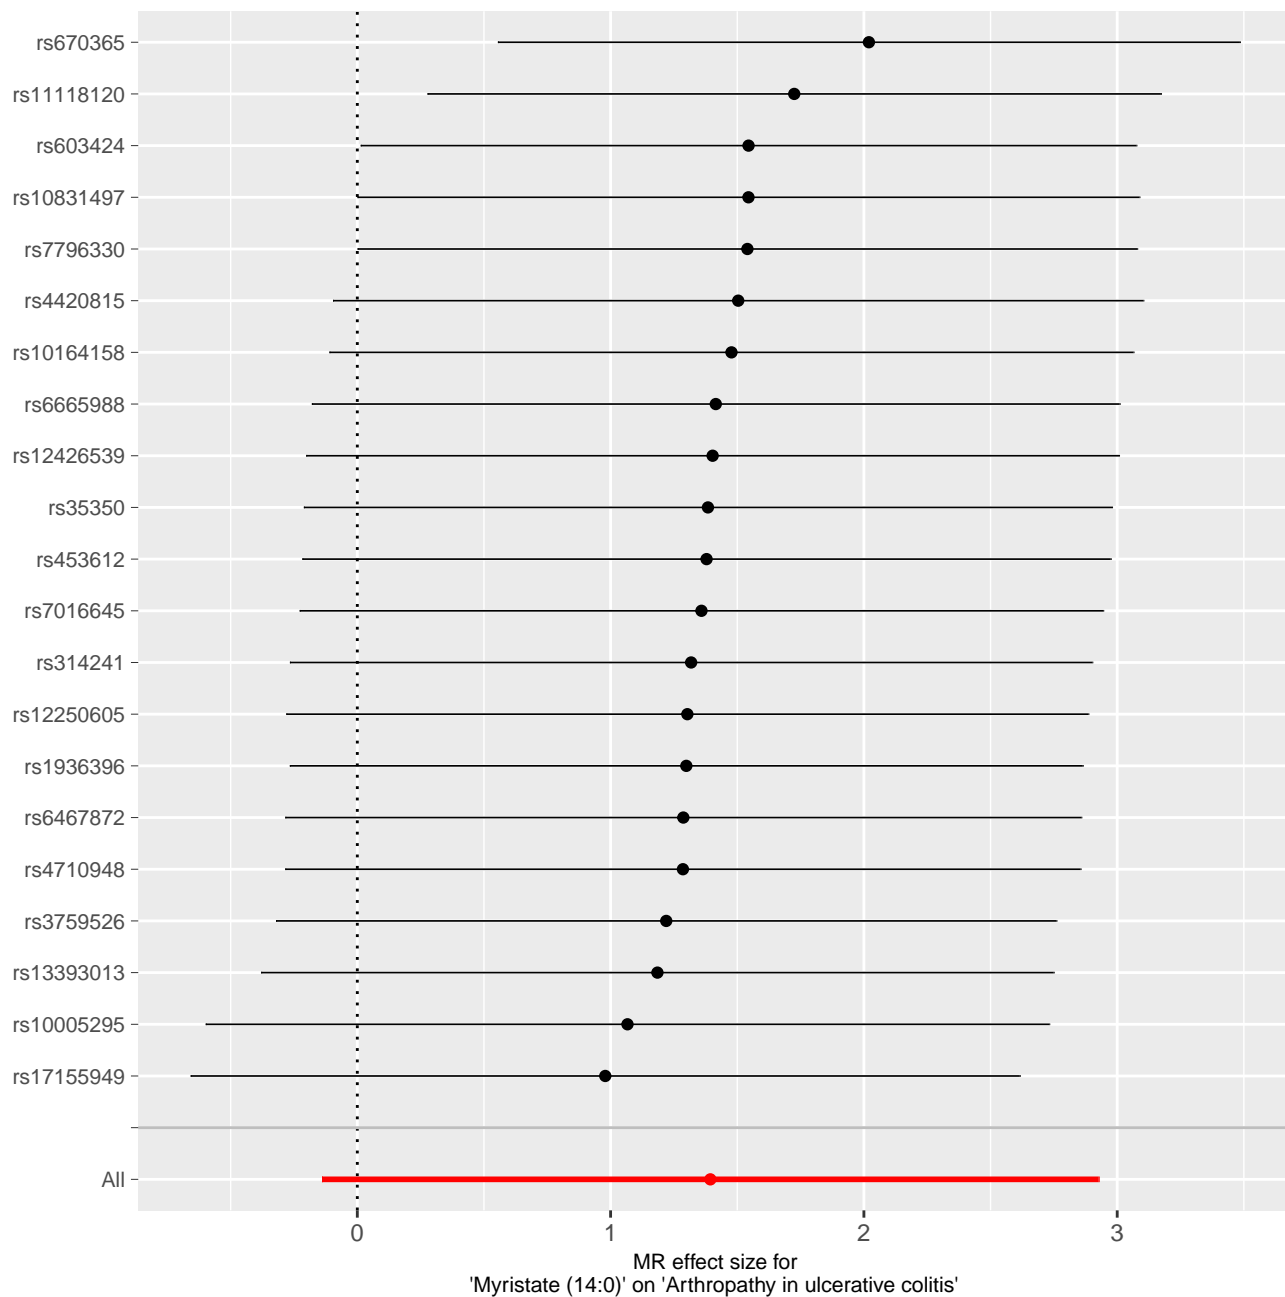

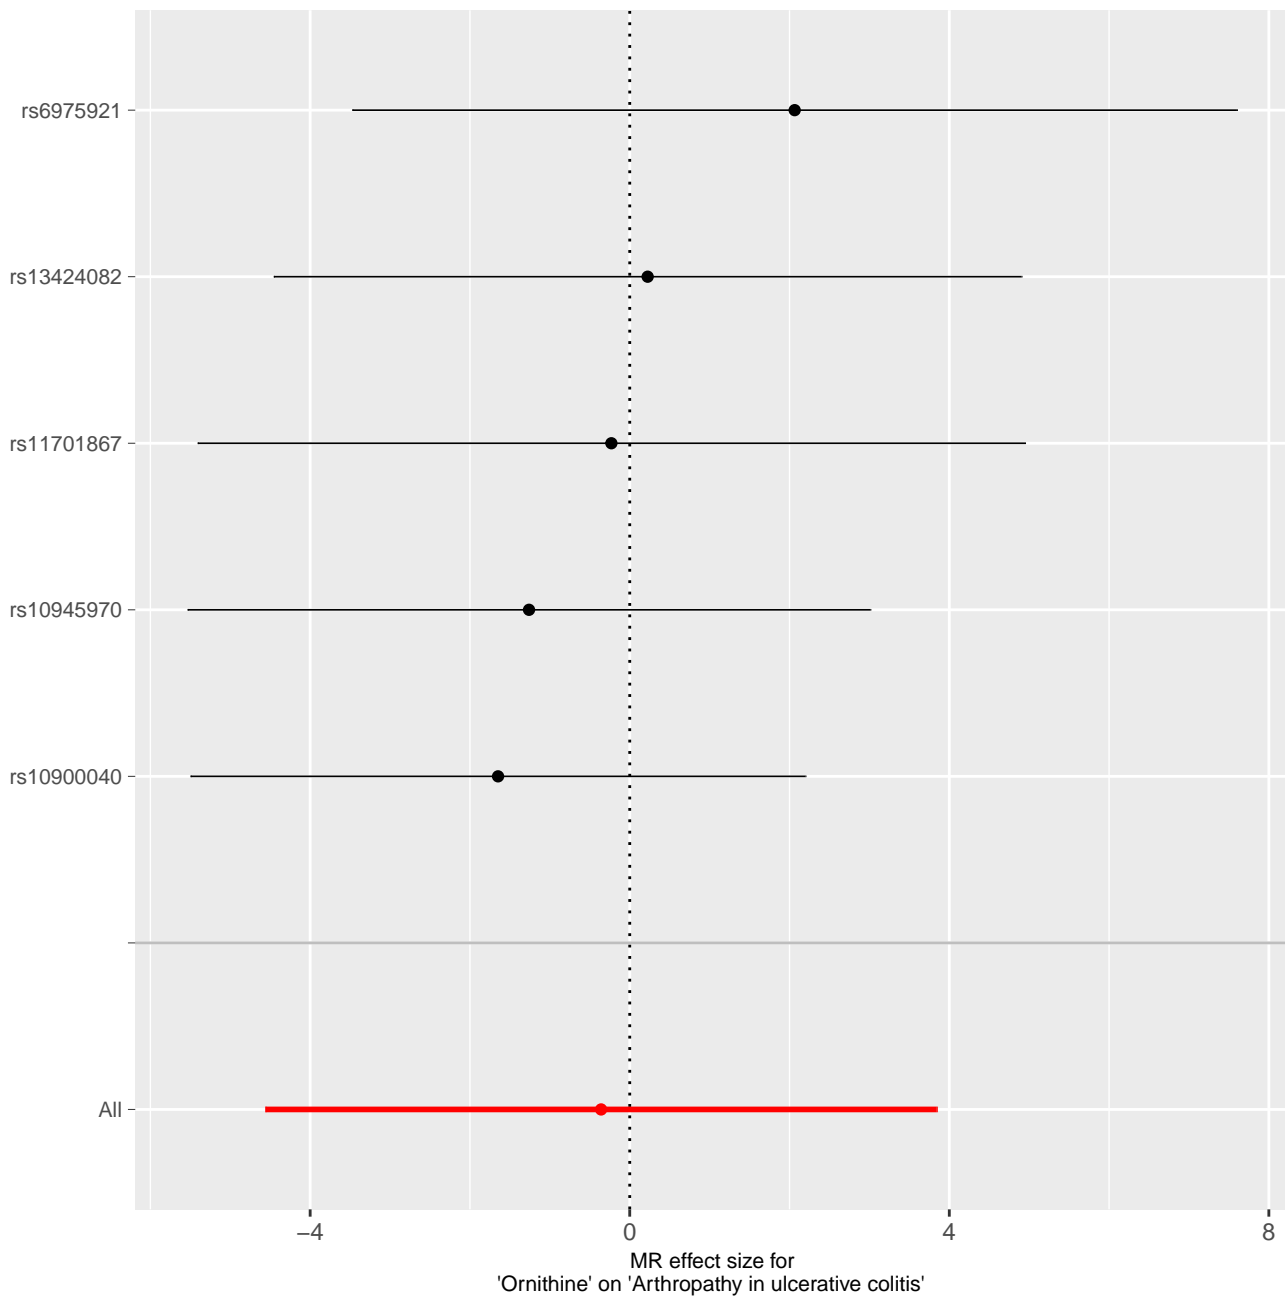

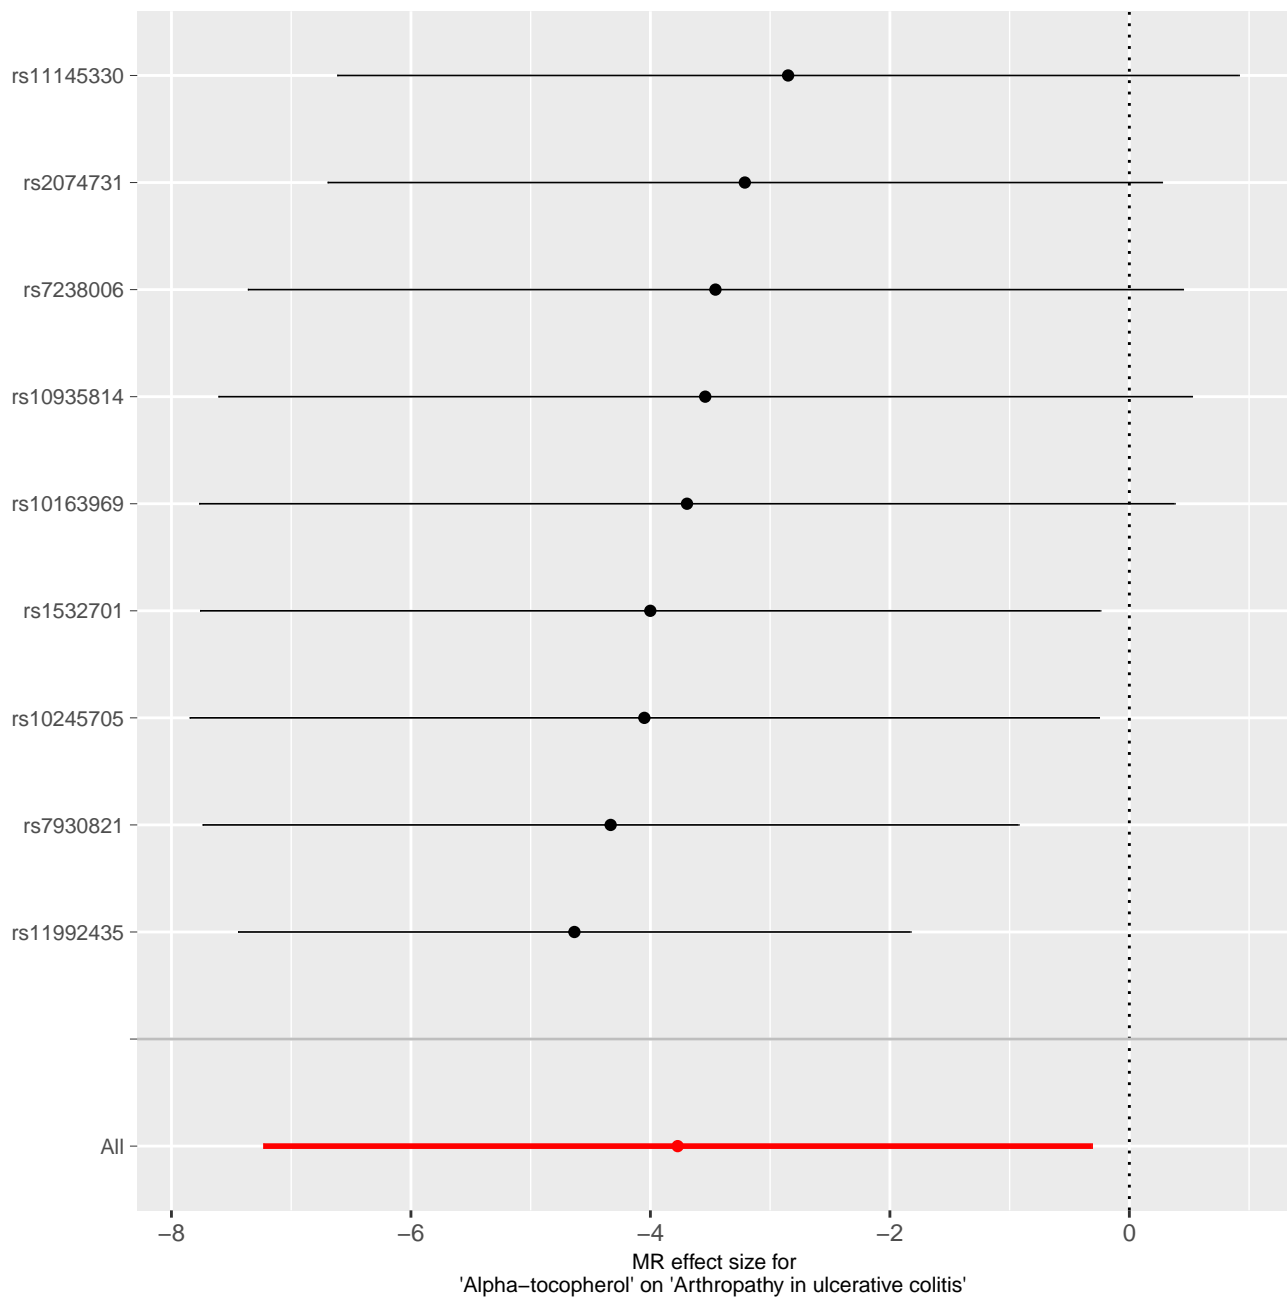

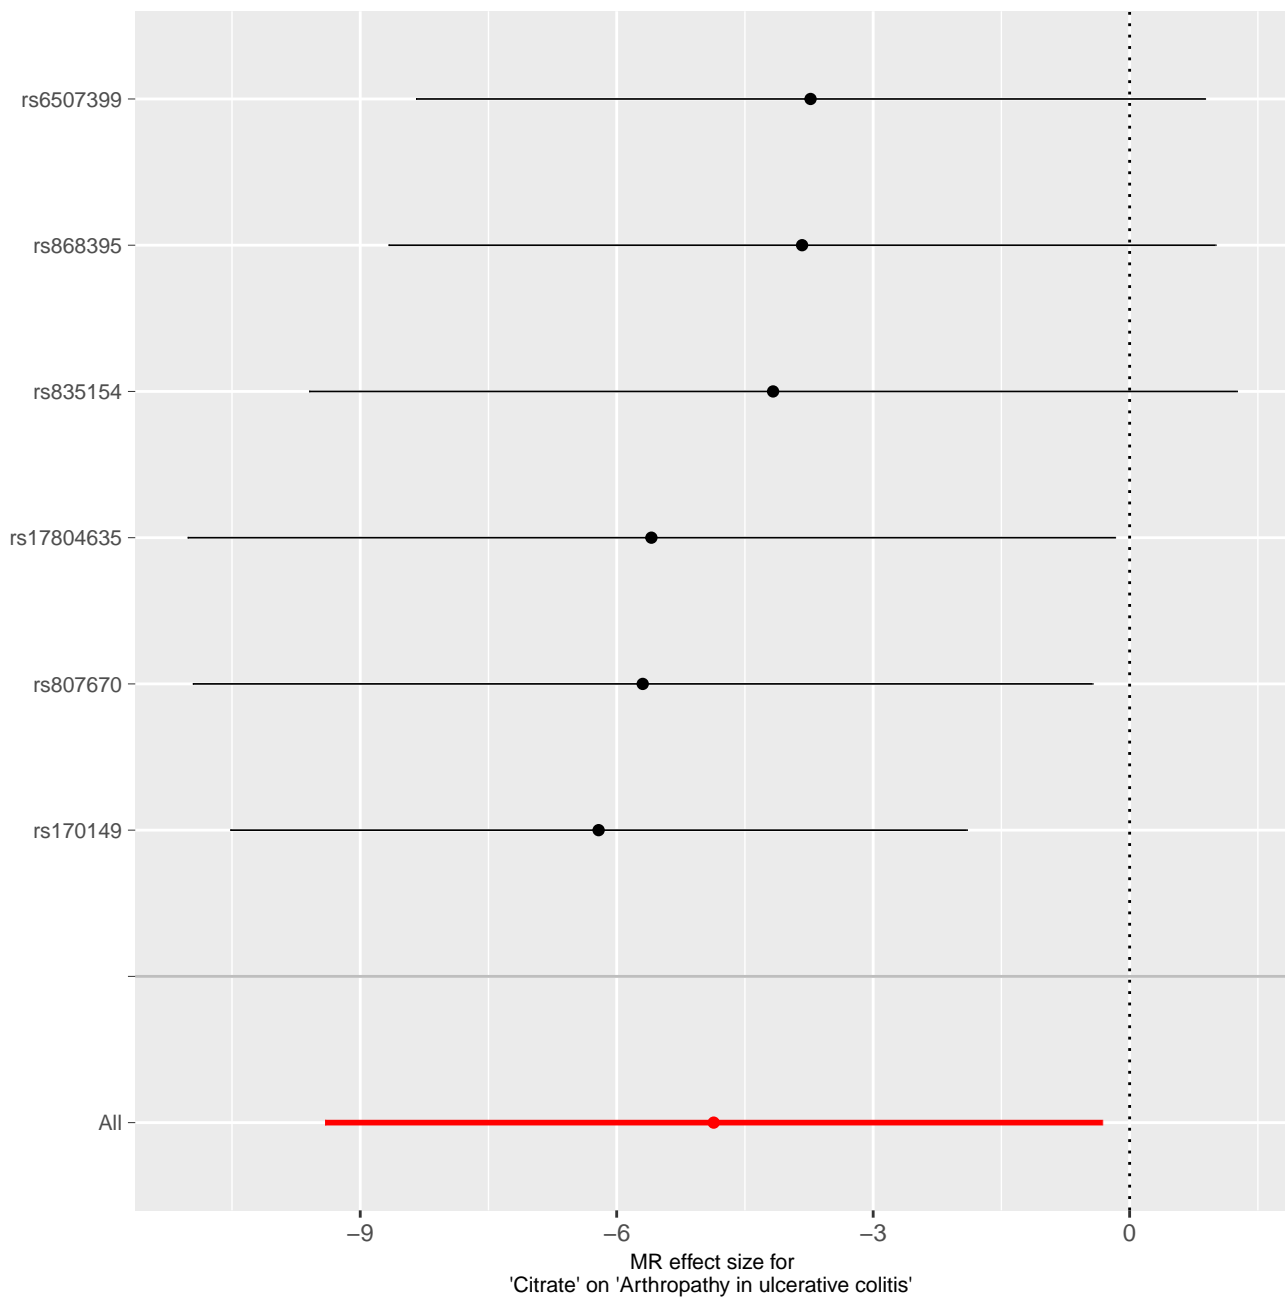

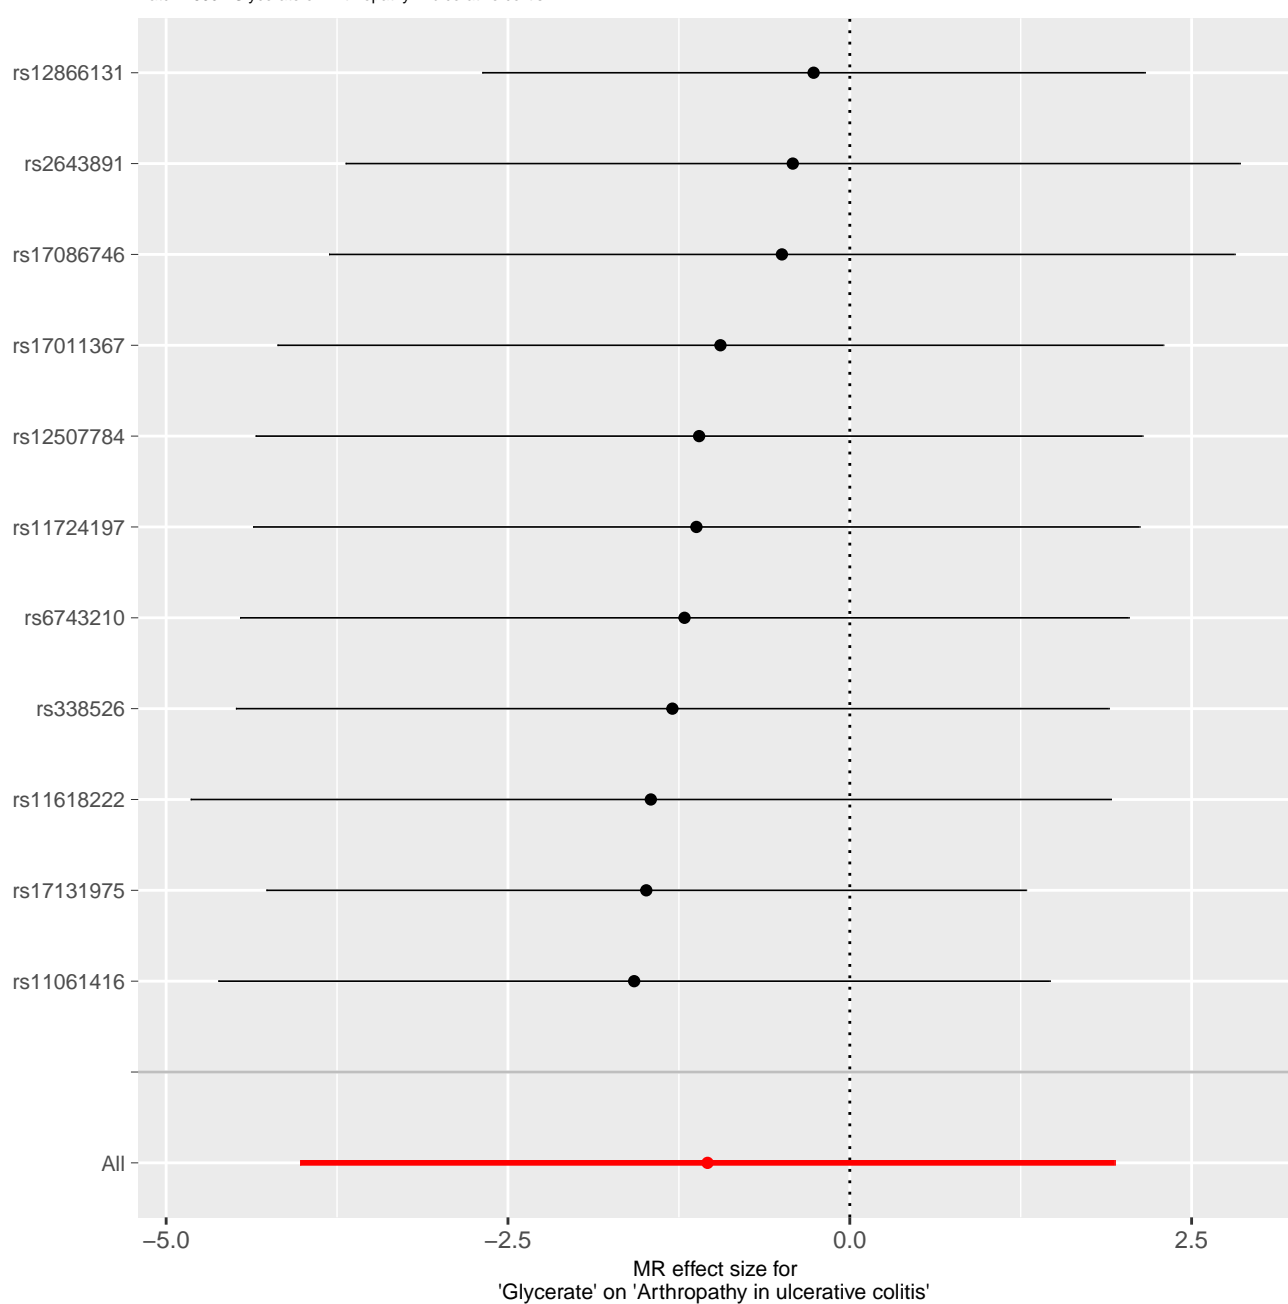

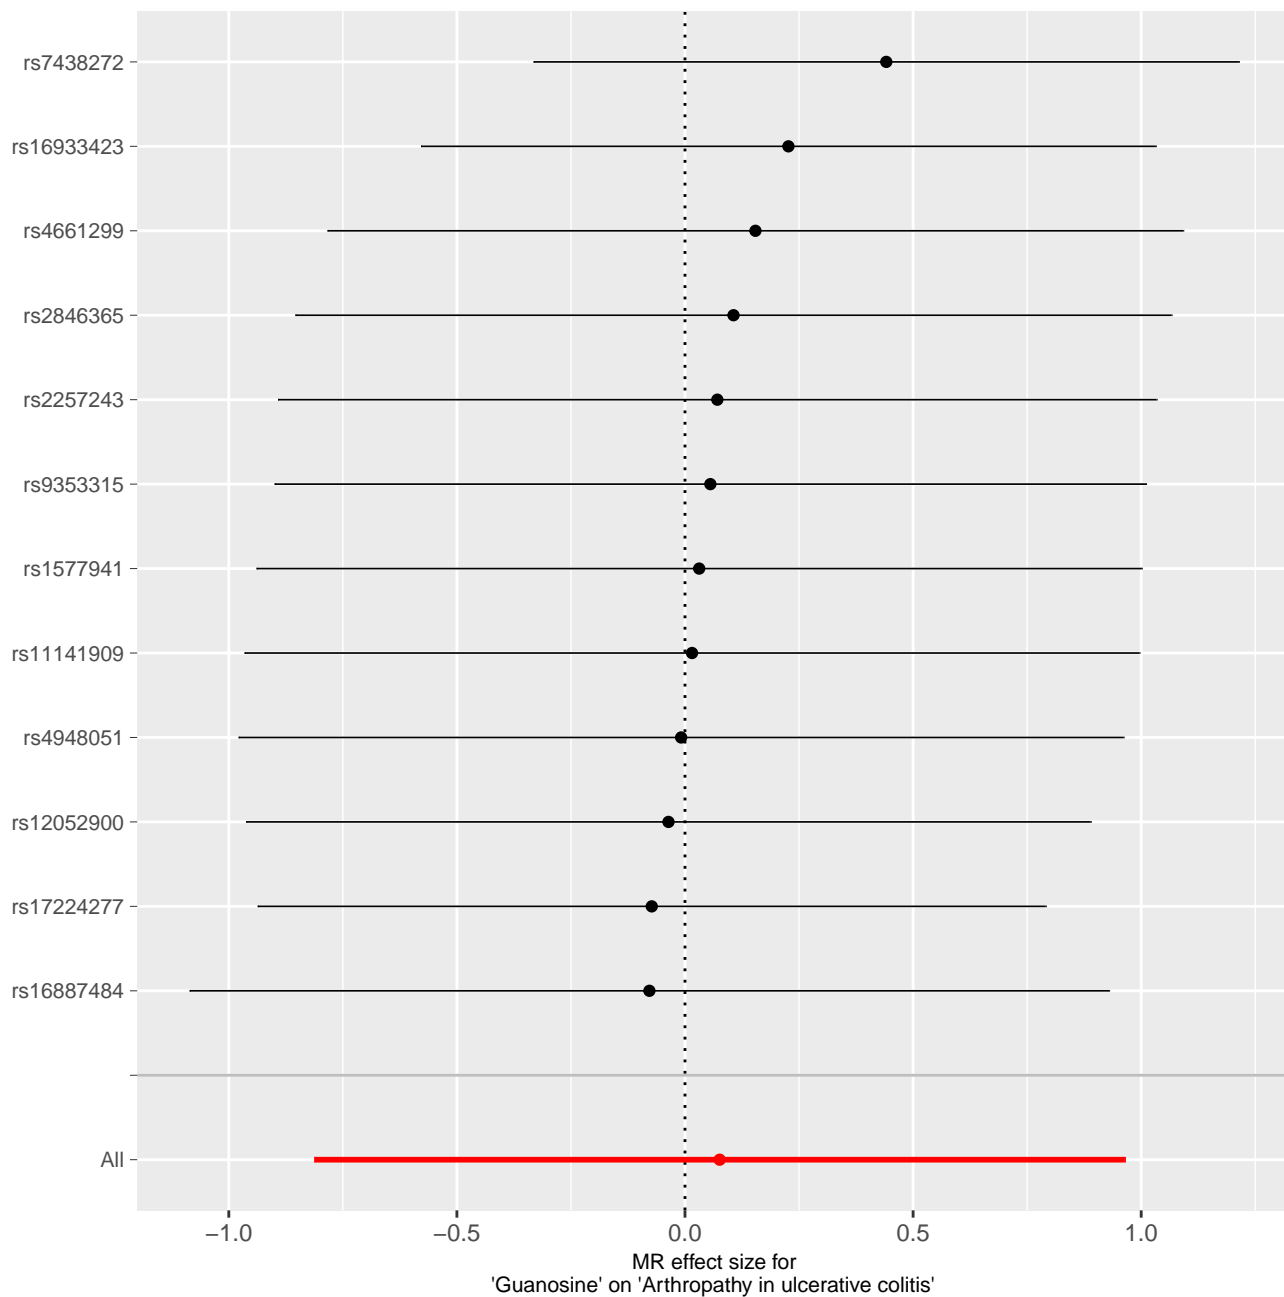



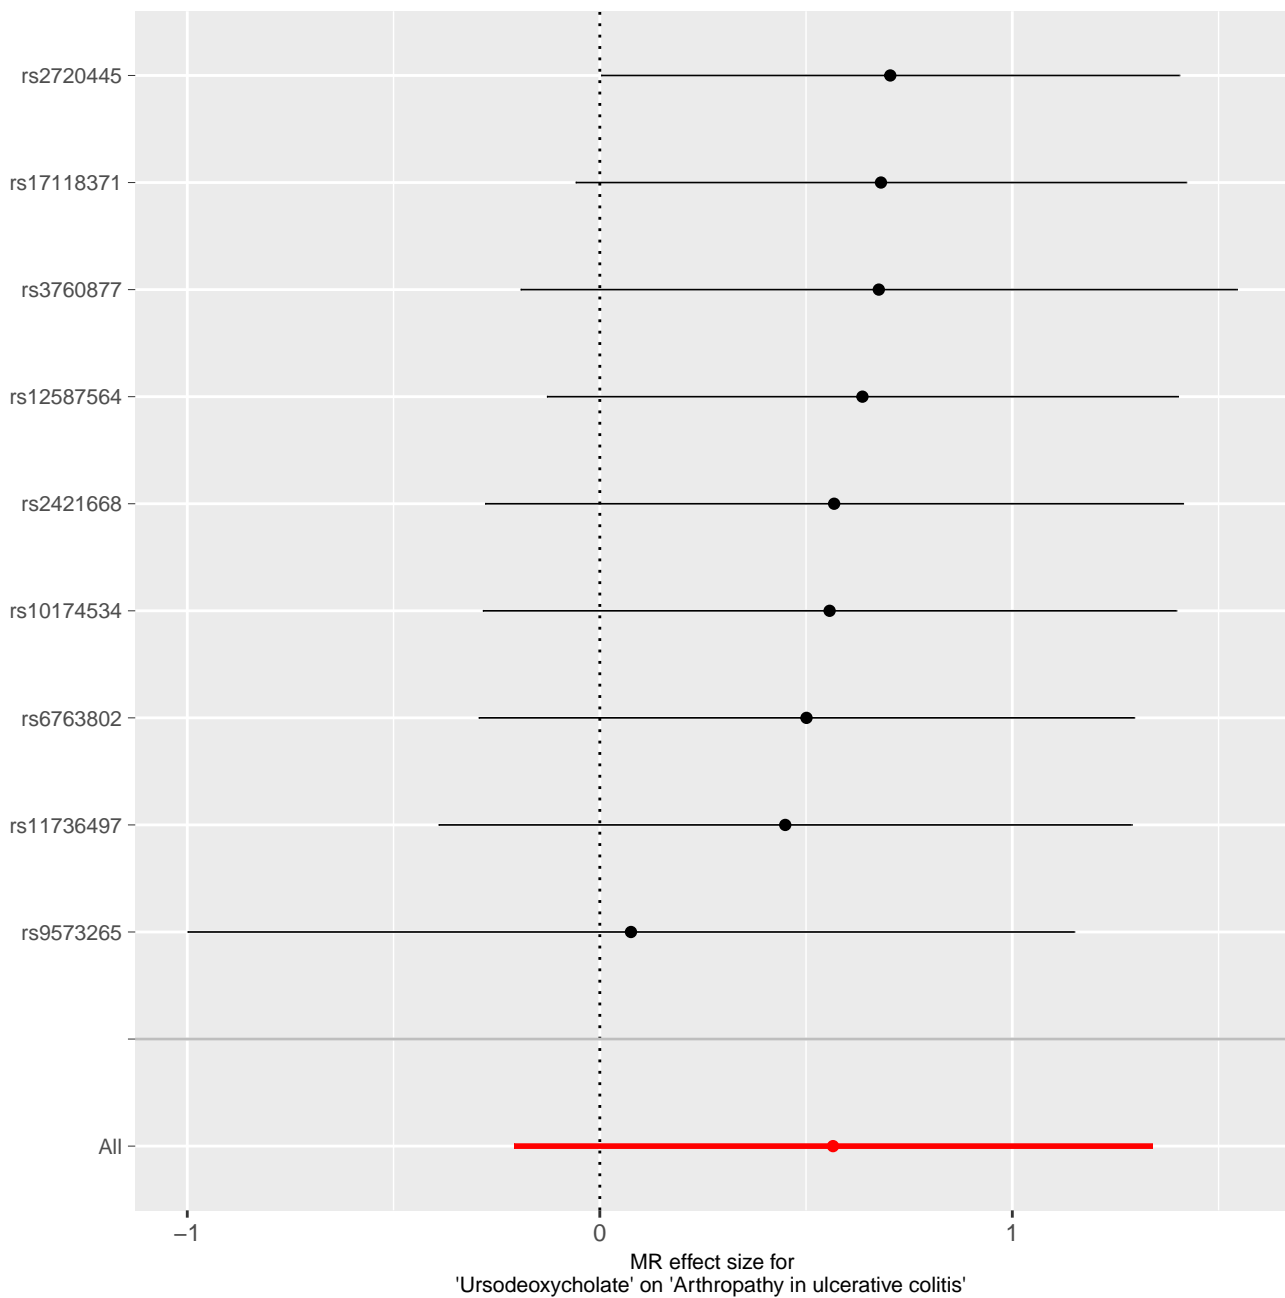

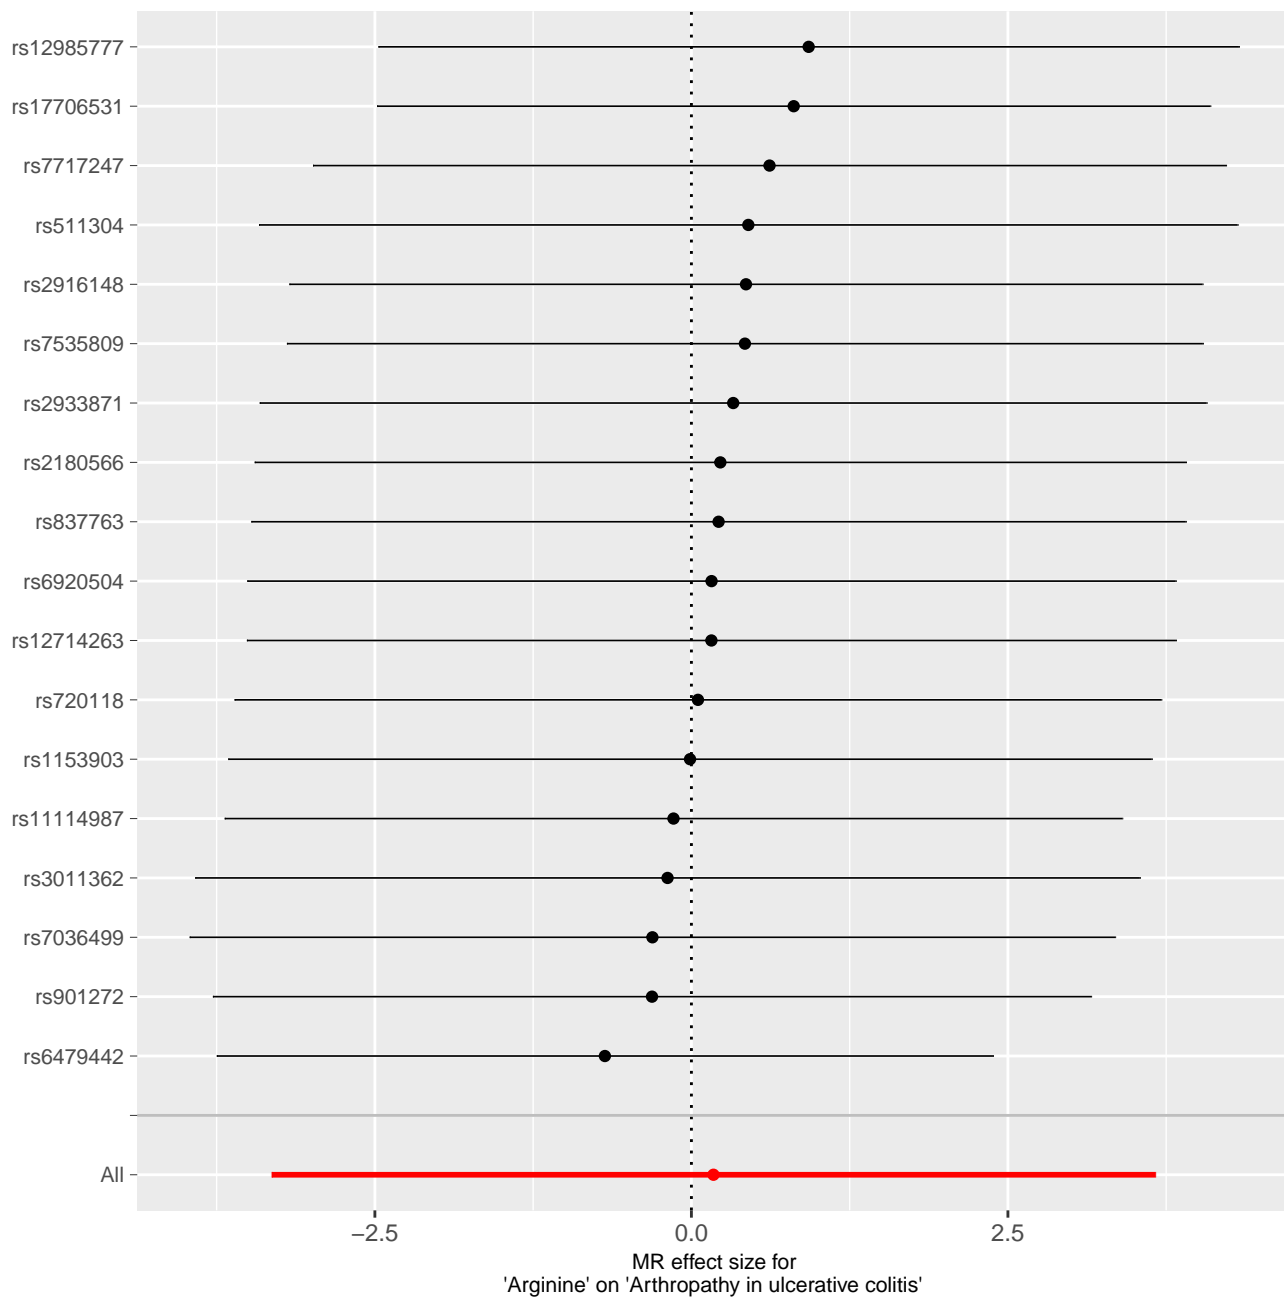

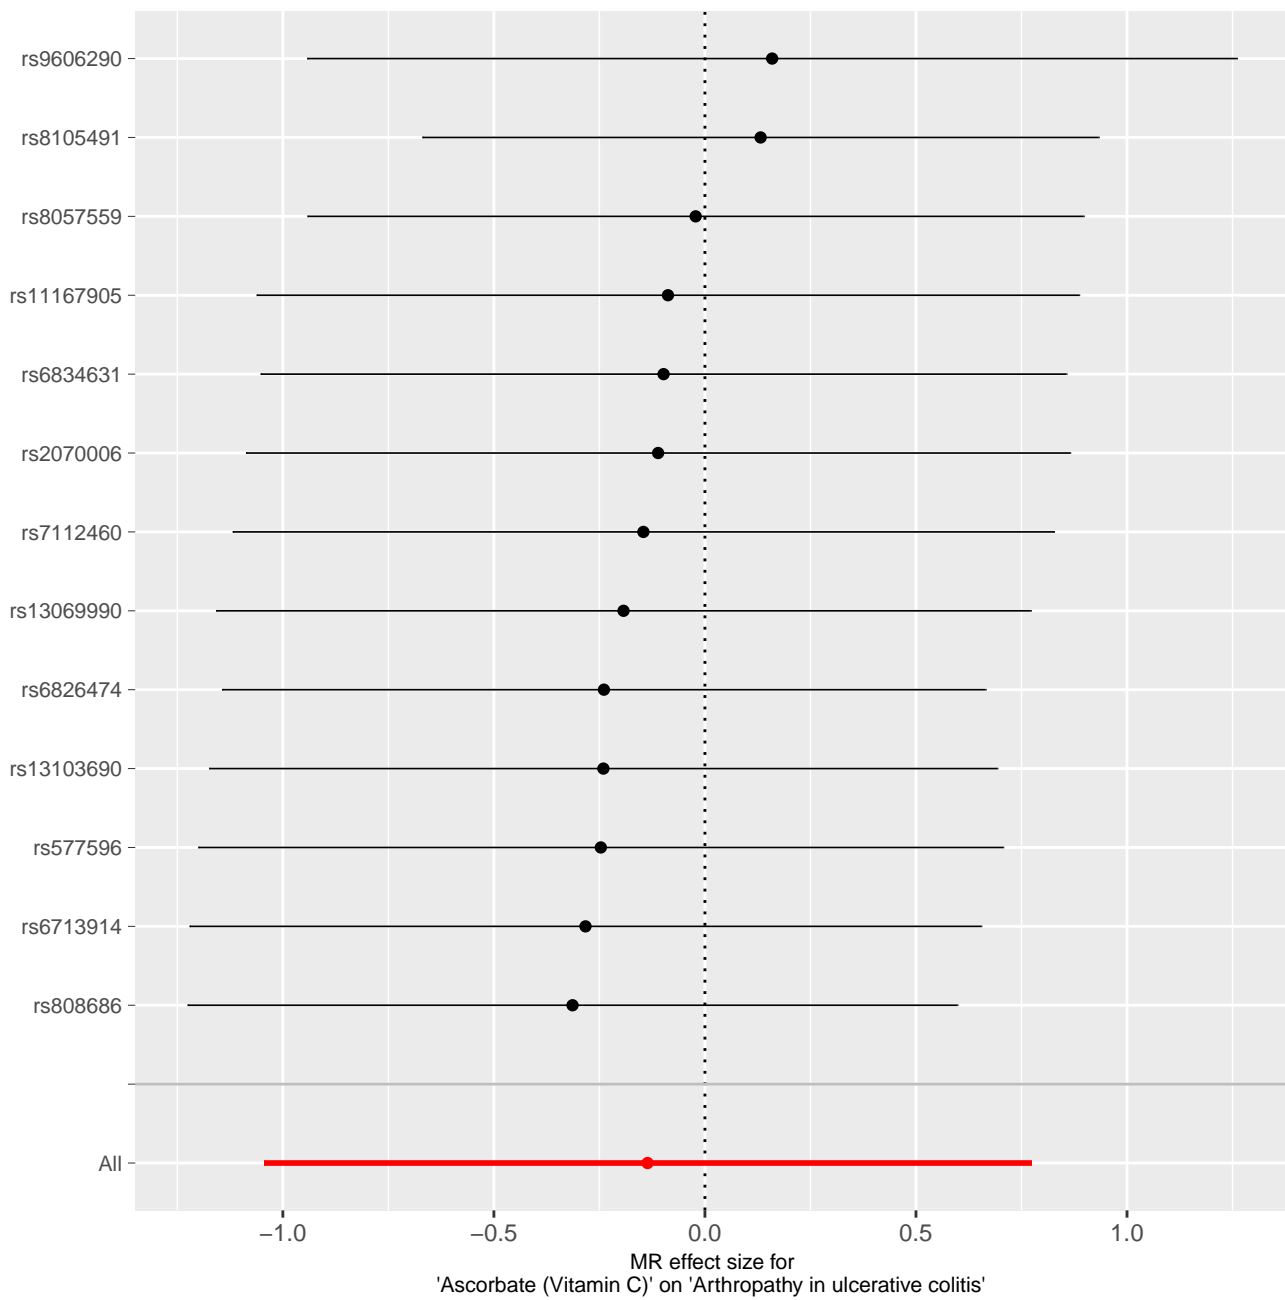

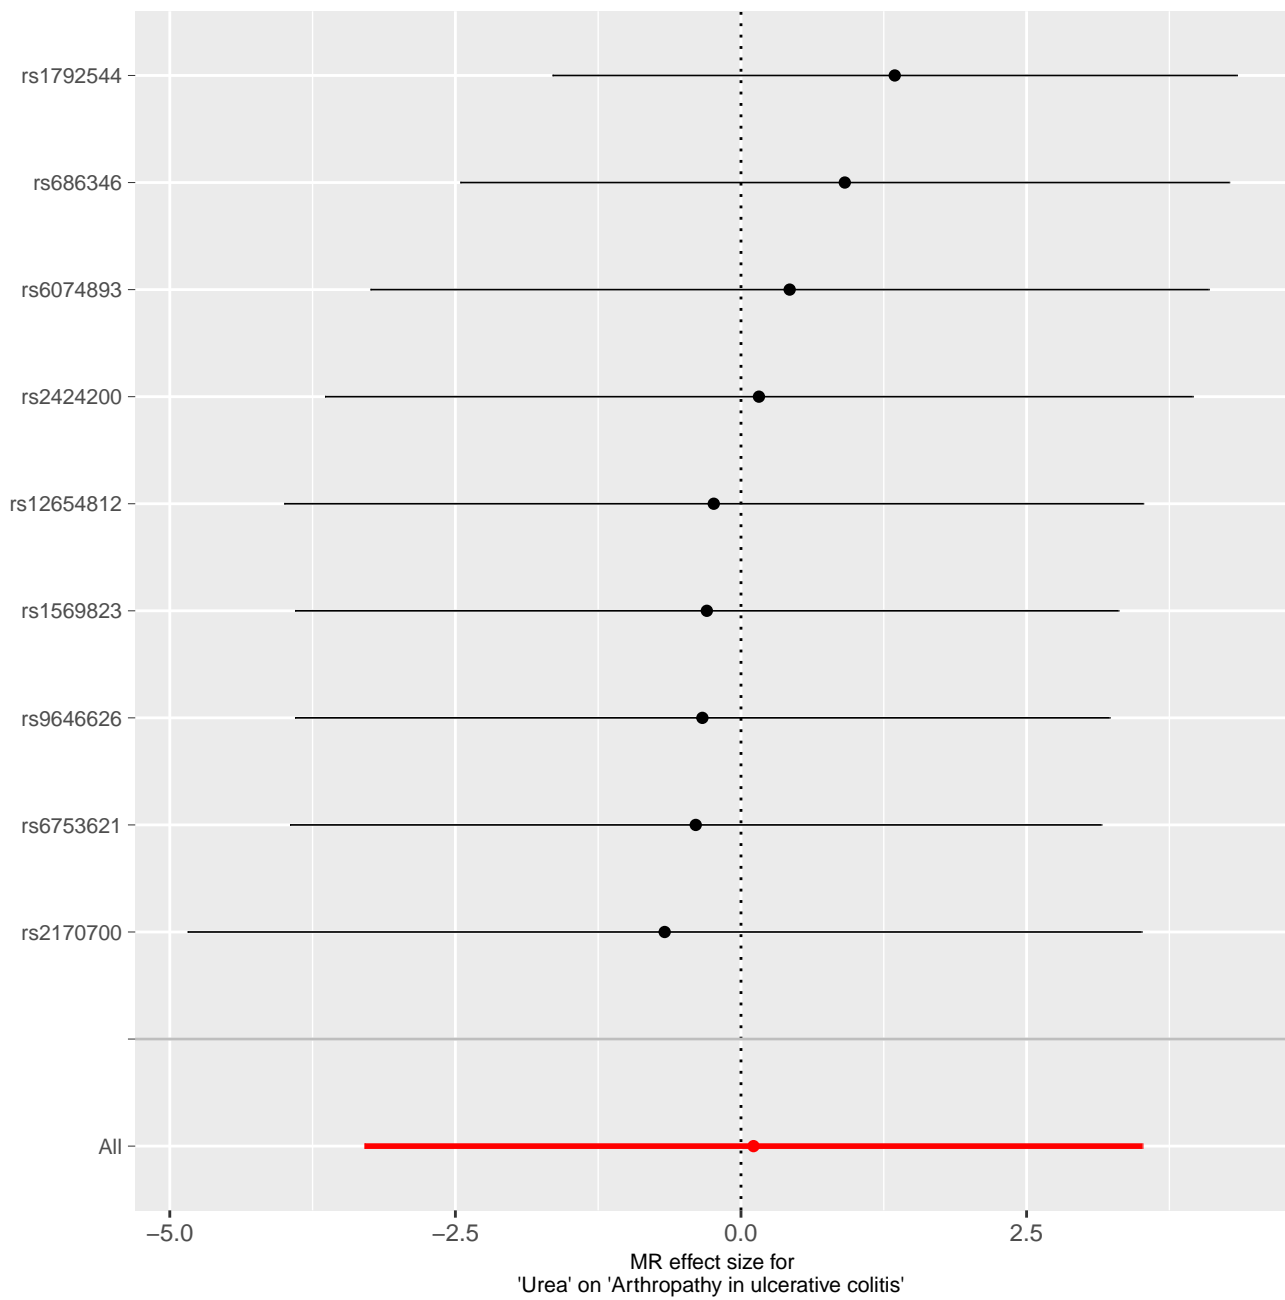

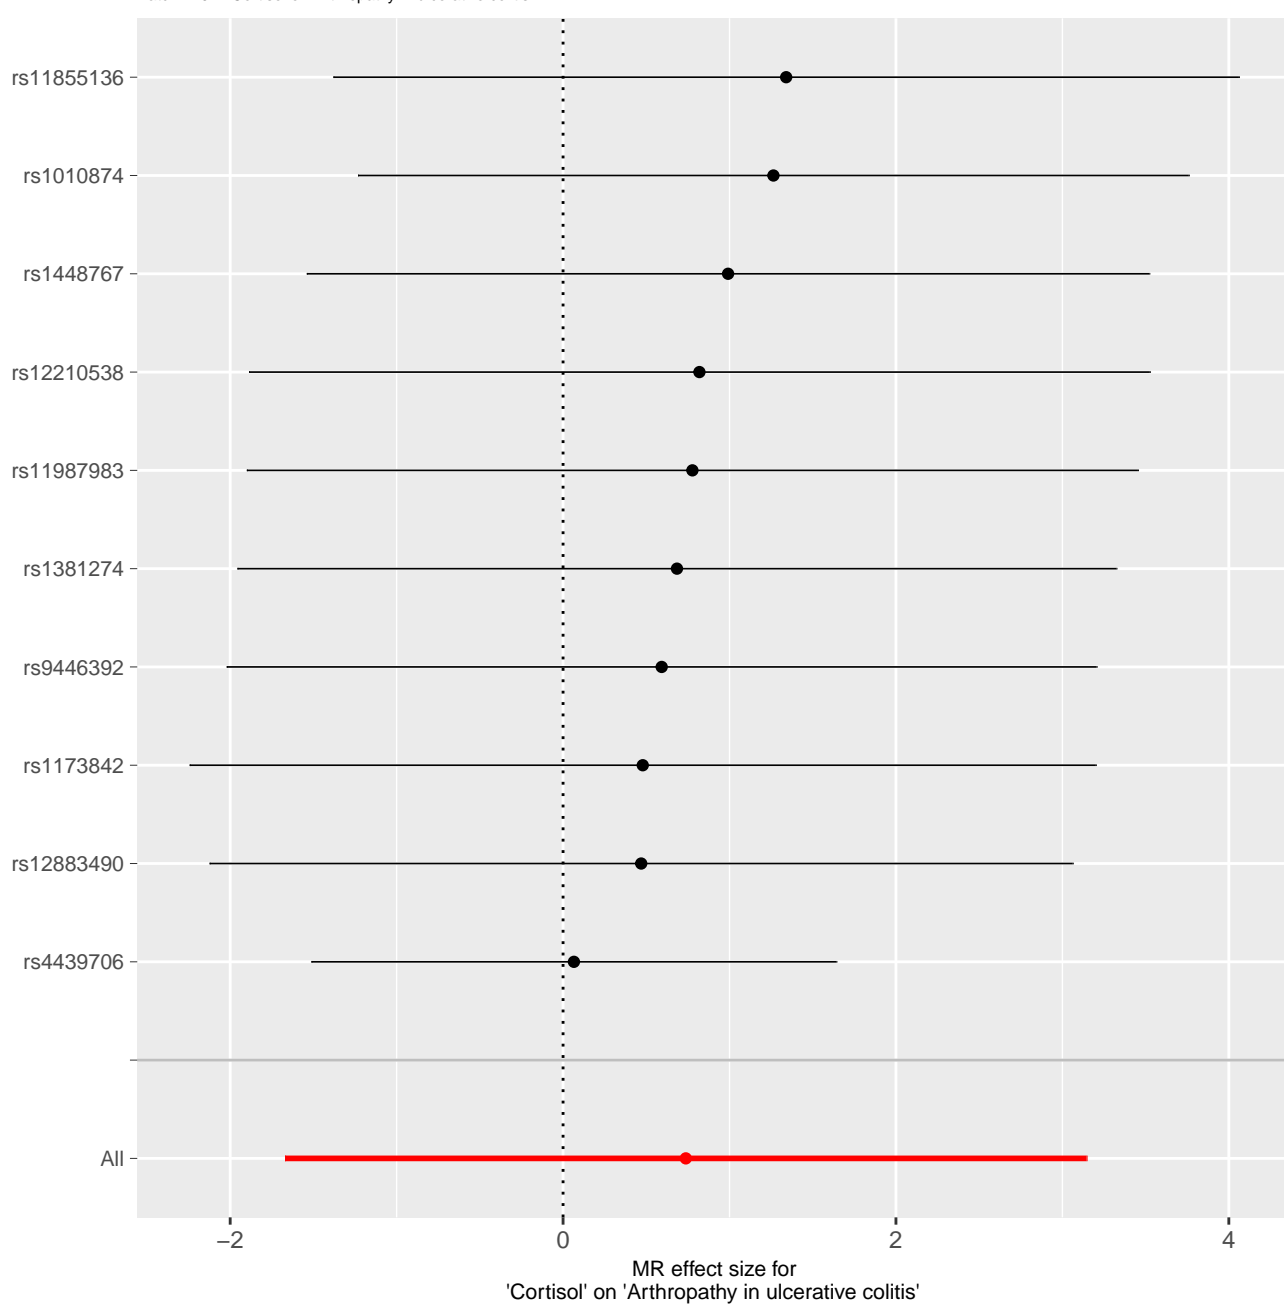

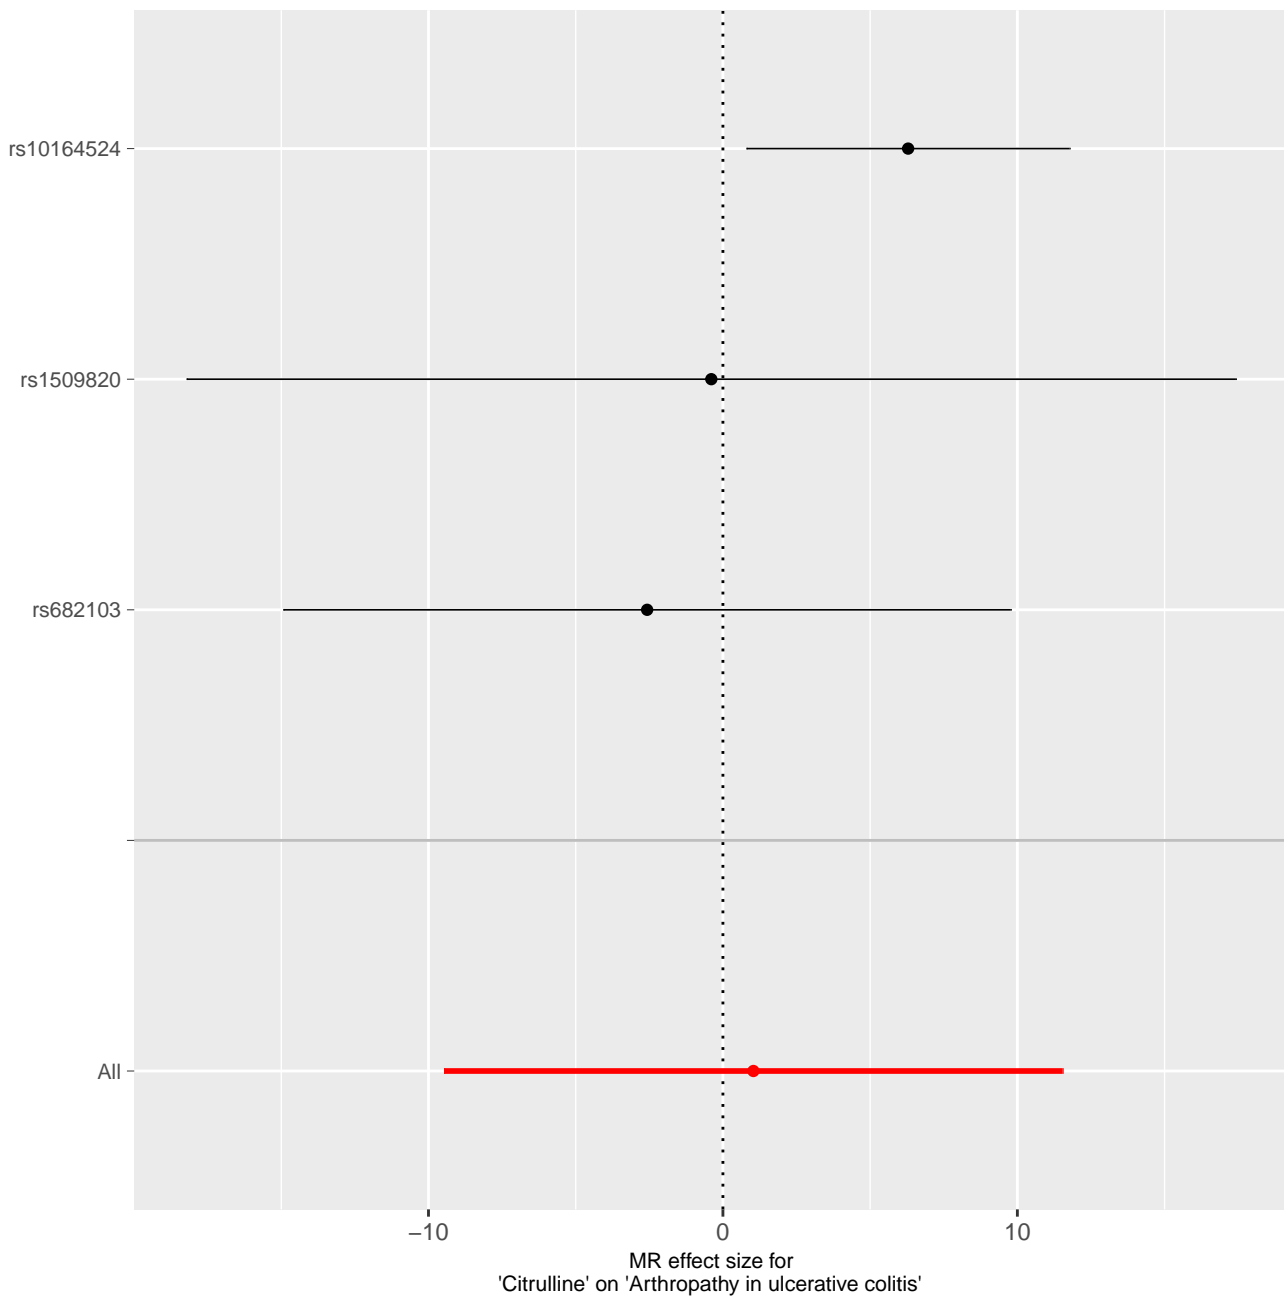

Batch 1706 : Serotonin (5HT) on Arthropathy in ulcerative colitis

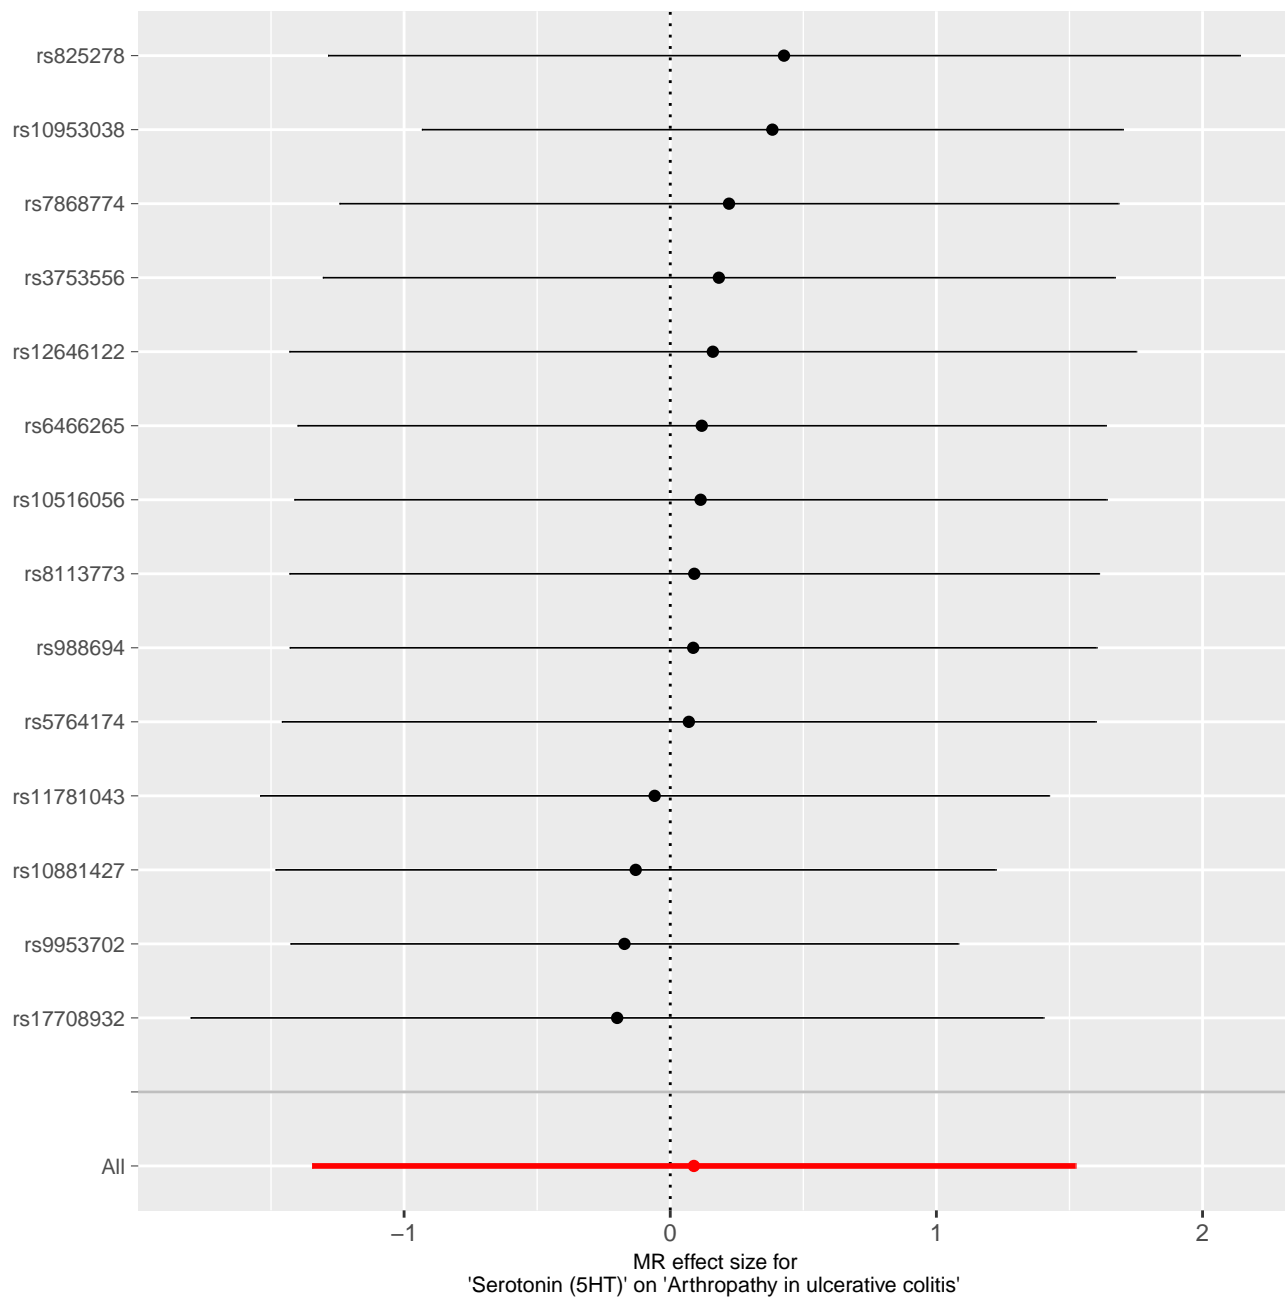

rs956966

rs875740

rs1512342

All

0

10

MR effect size for  
'Gamma-glutamyltyrosine' on 'Arthropathy in ulcerative colitis'

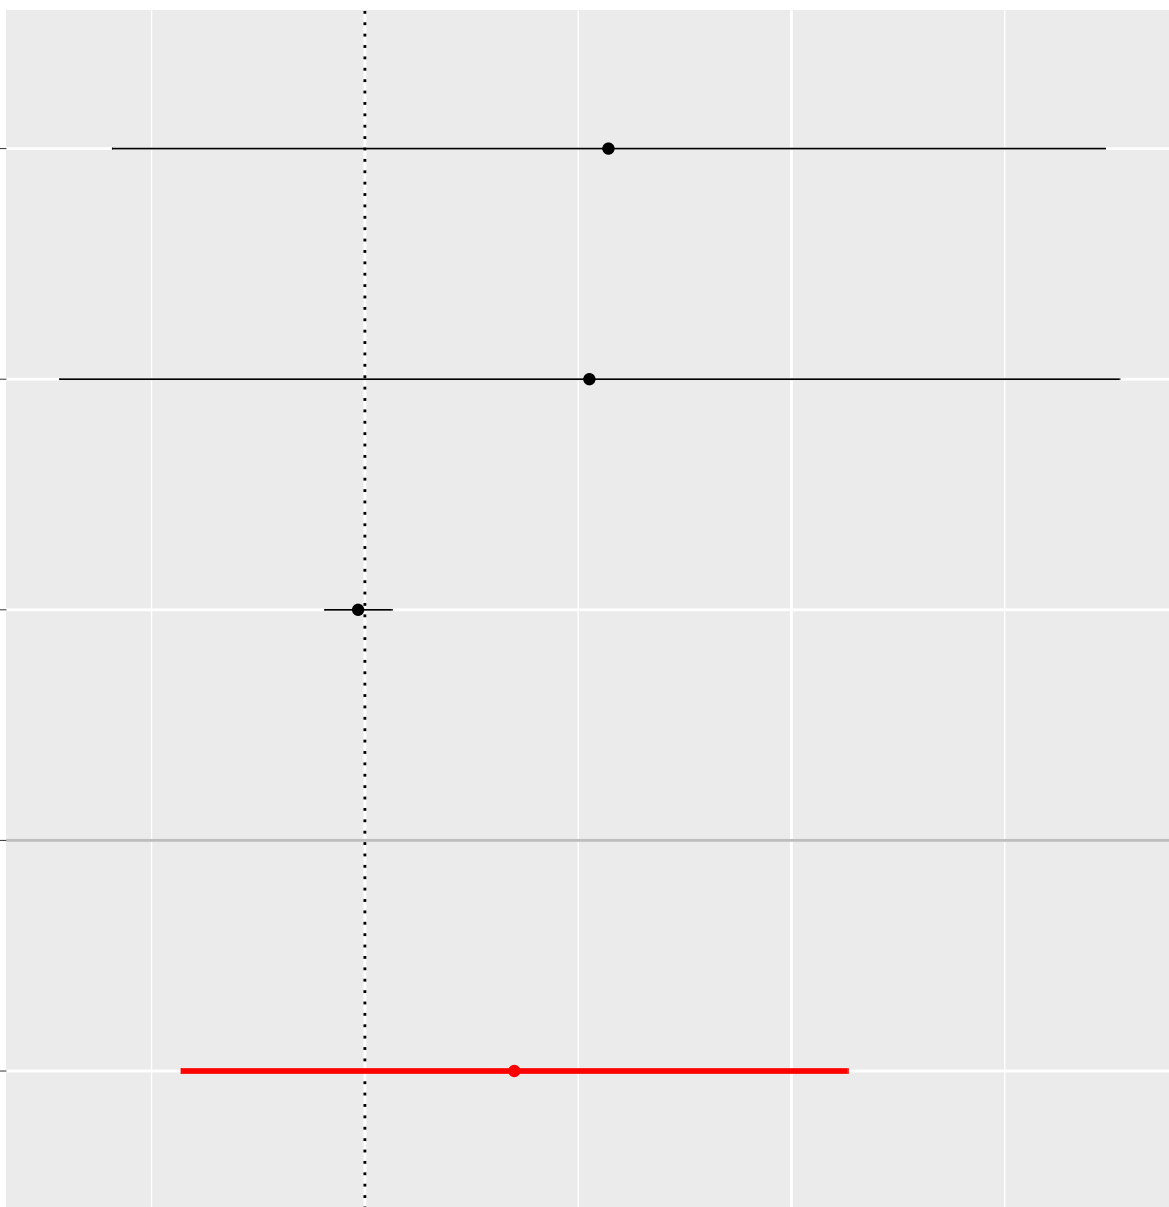



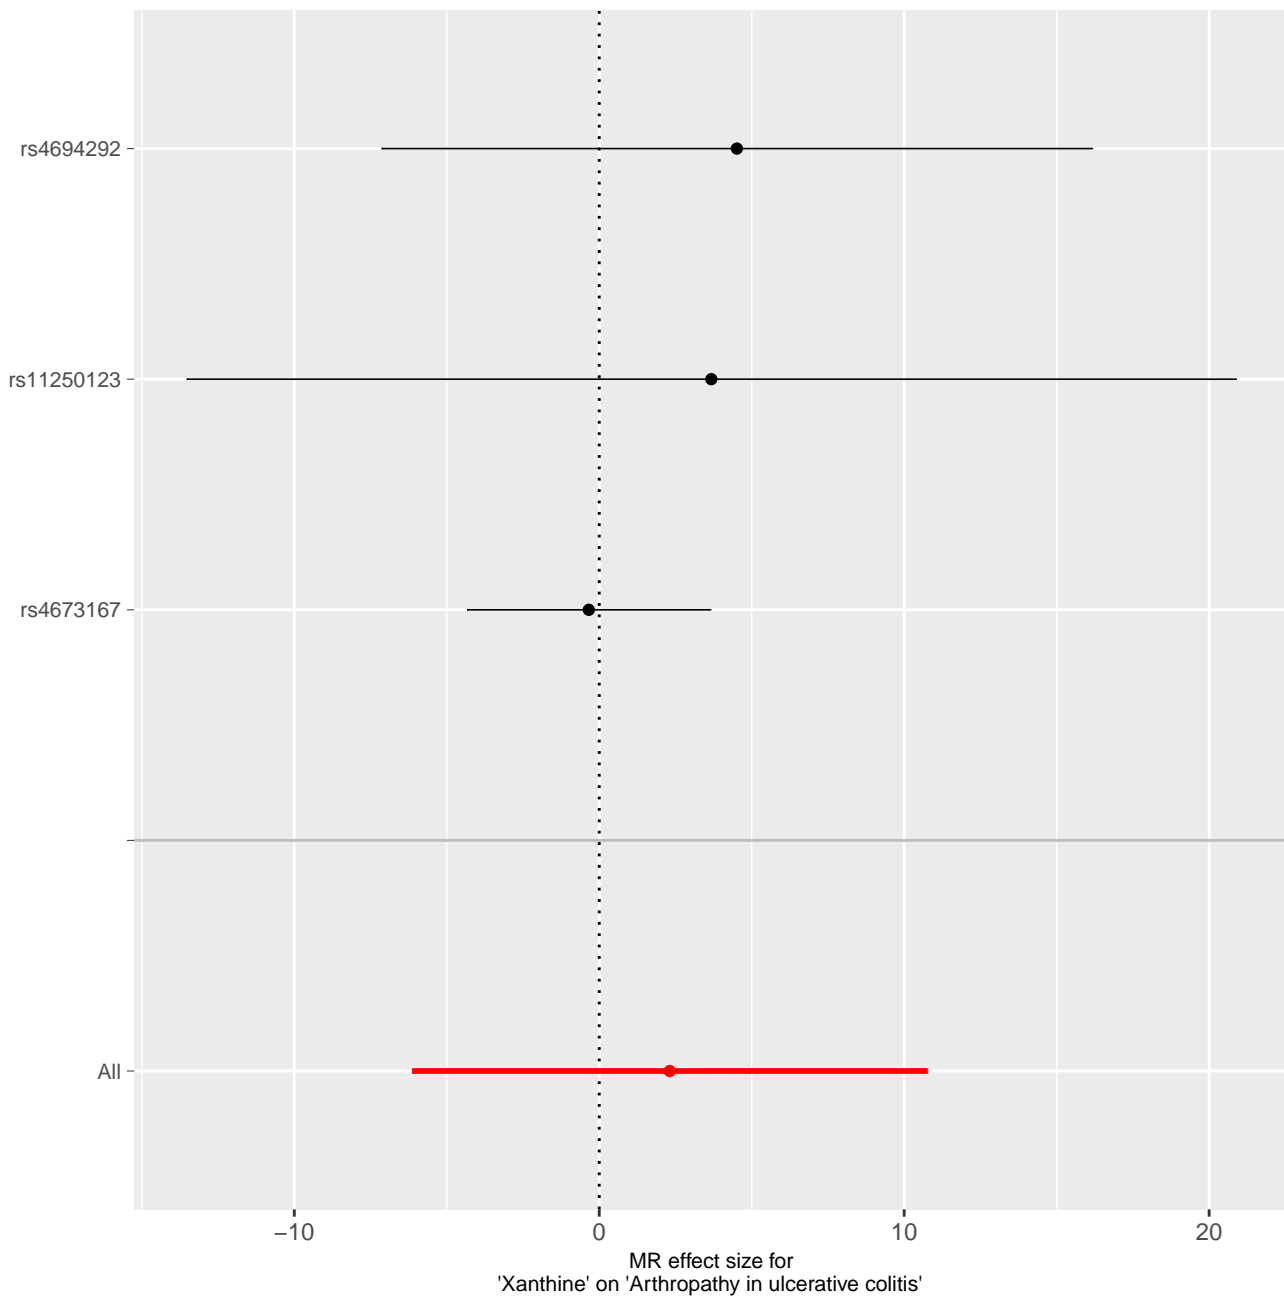

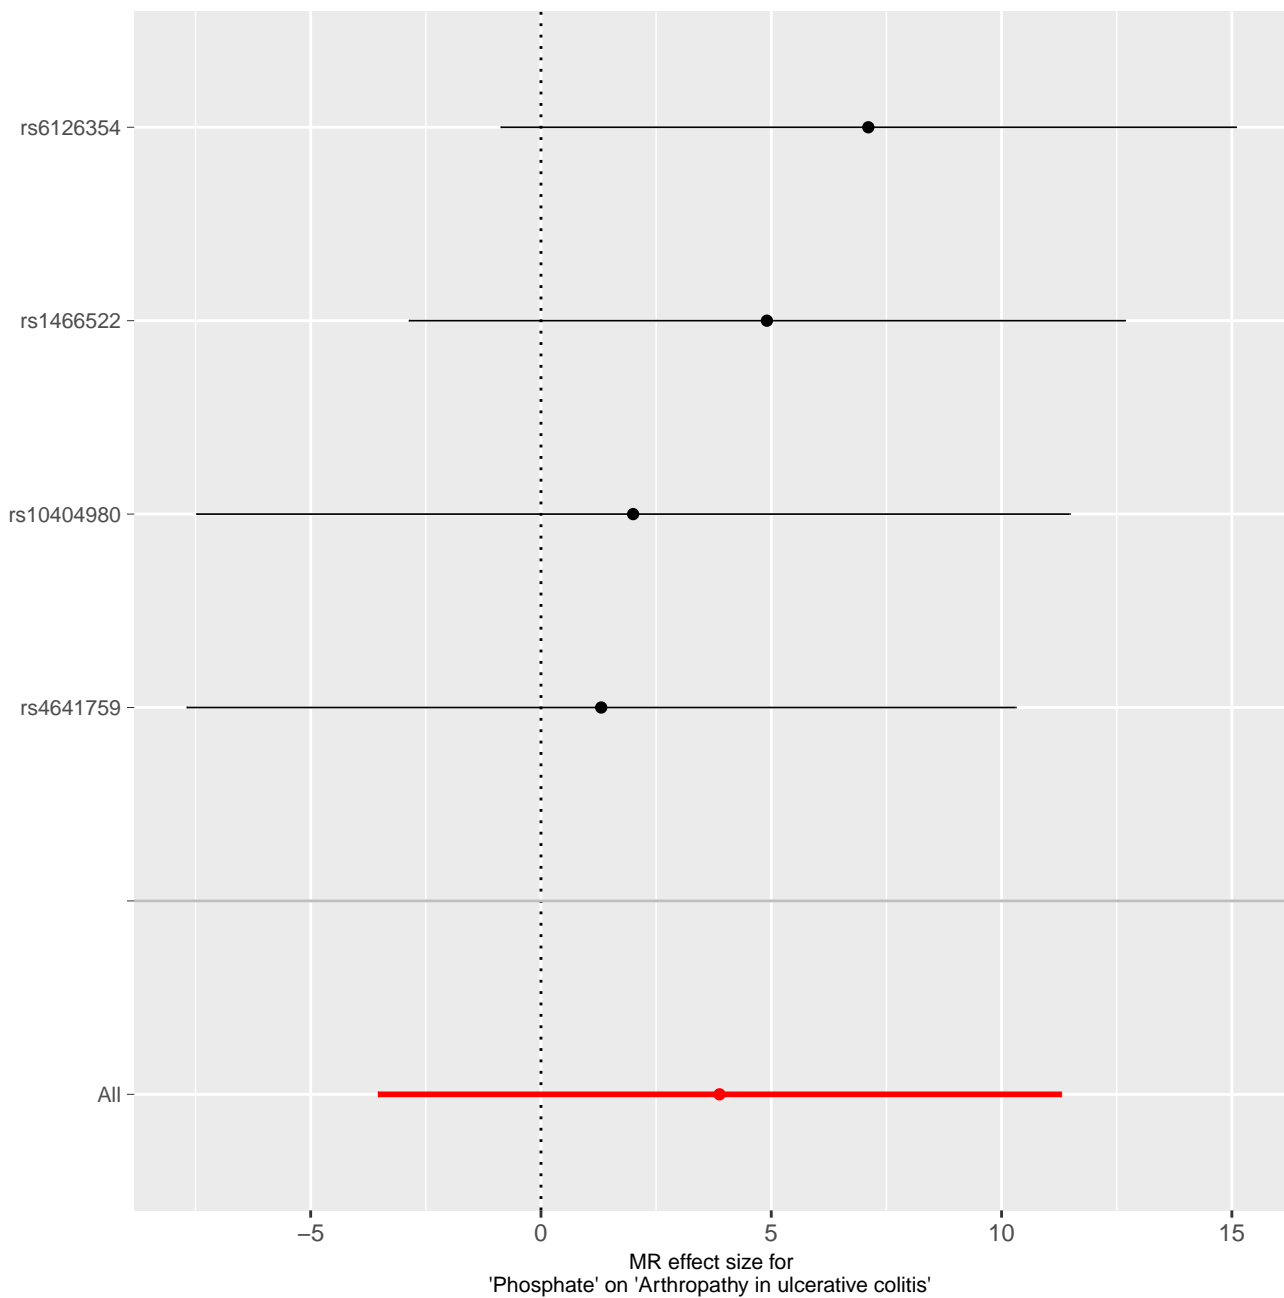

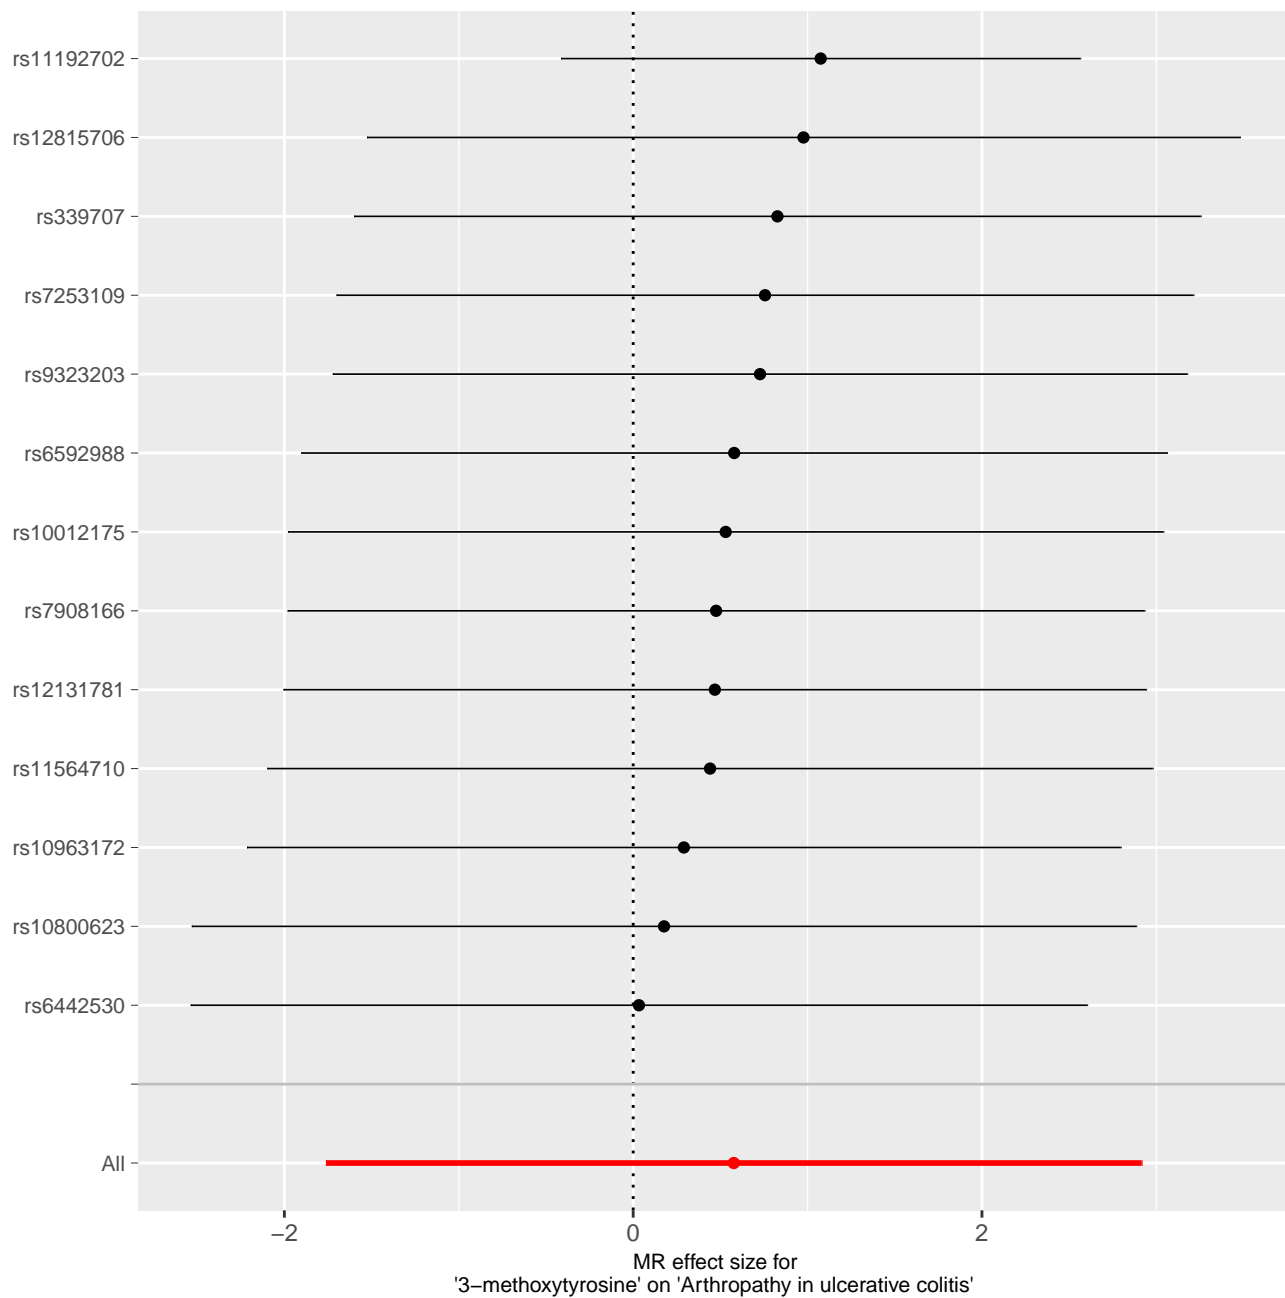

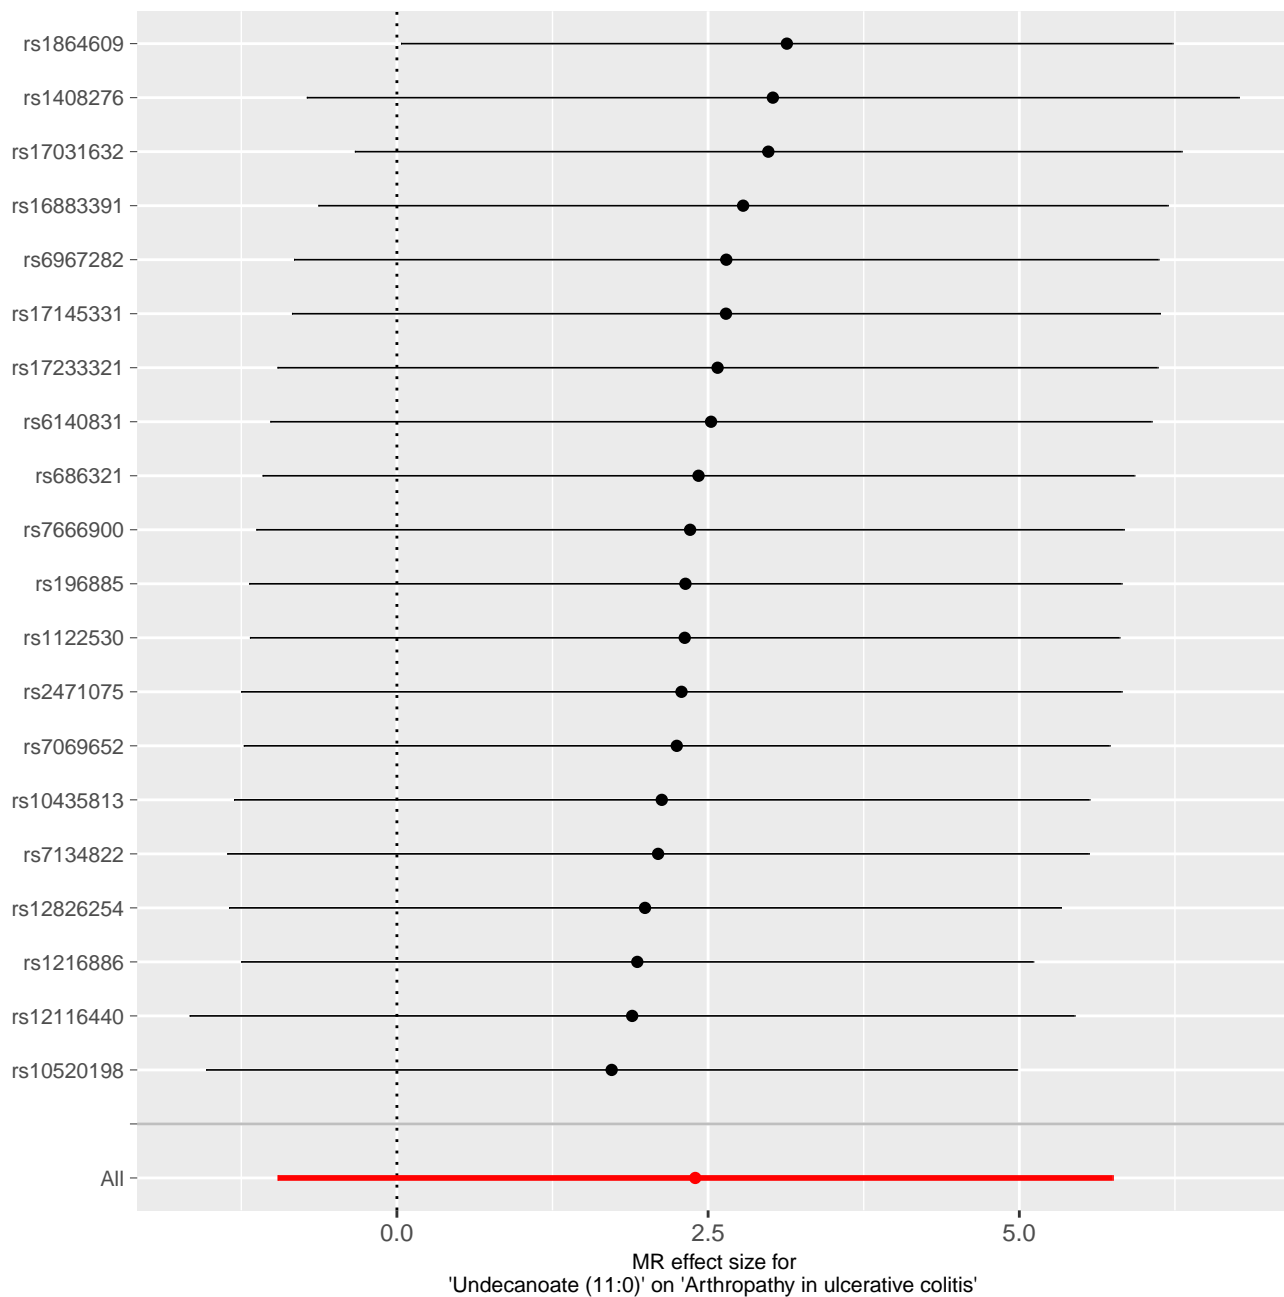

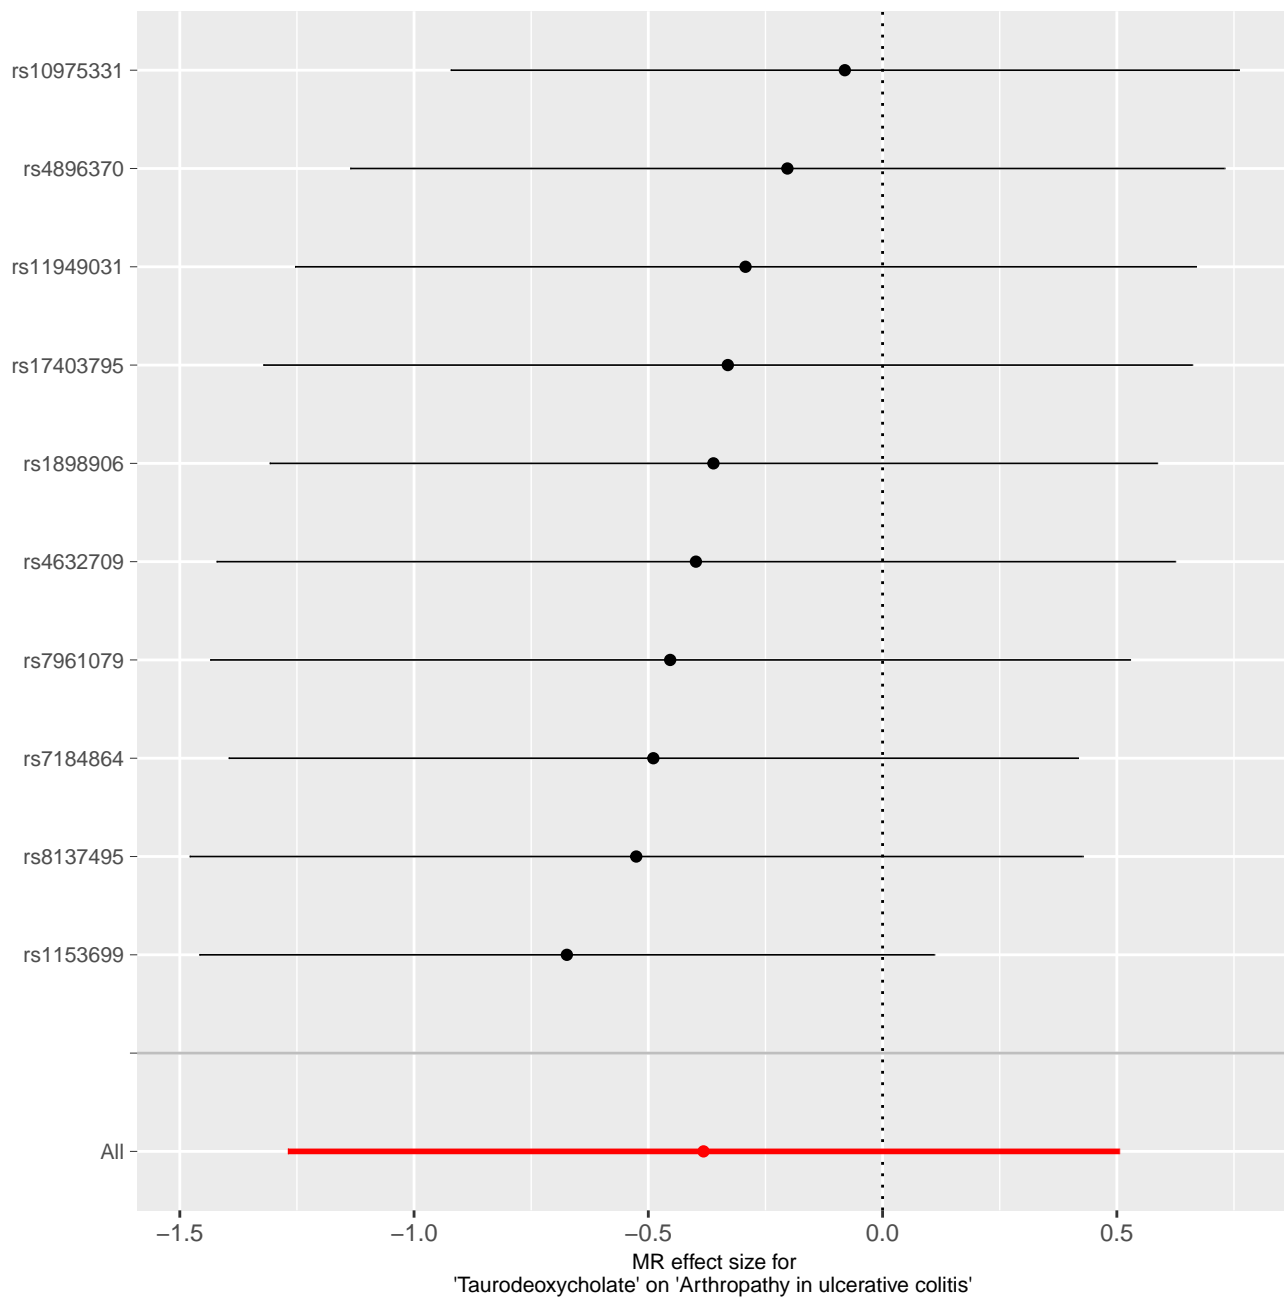

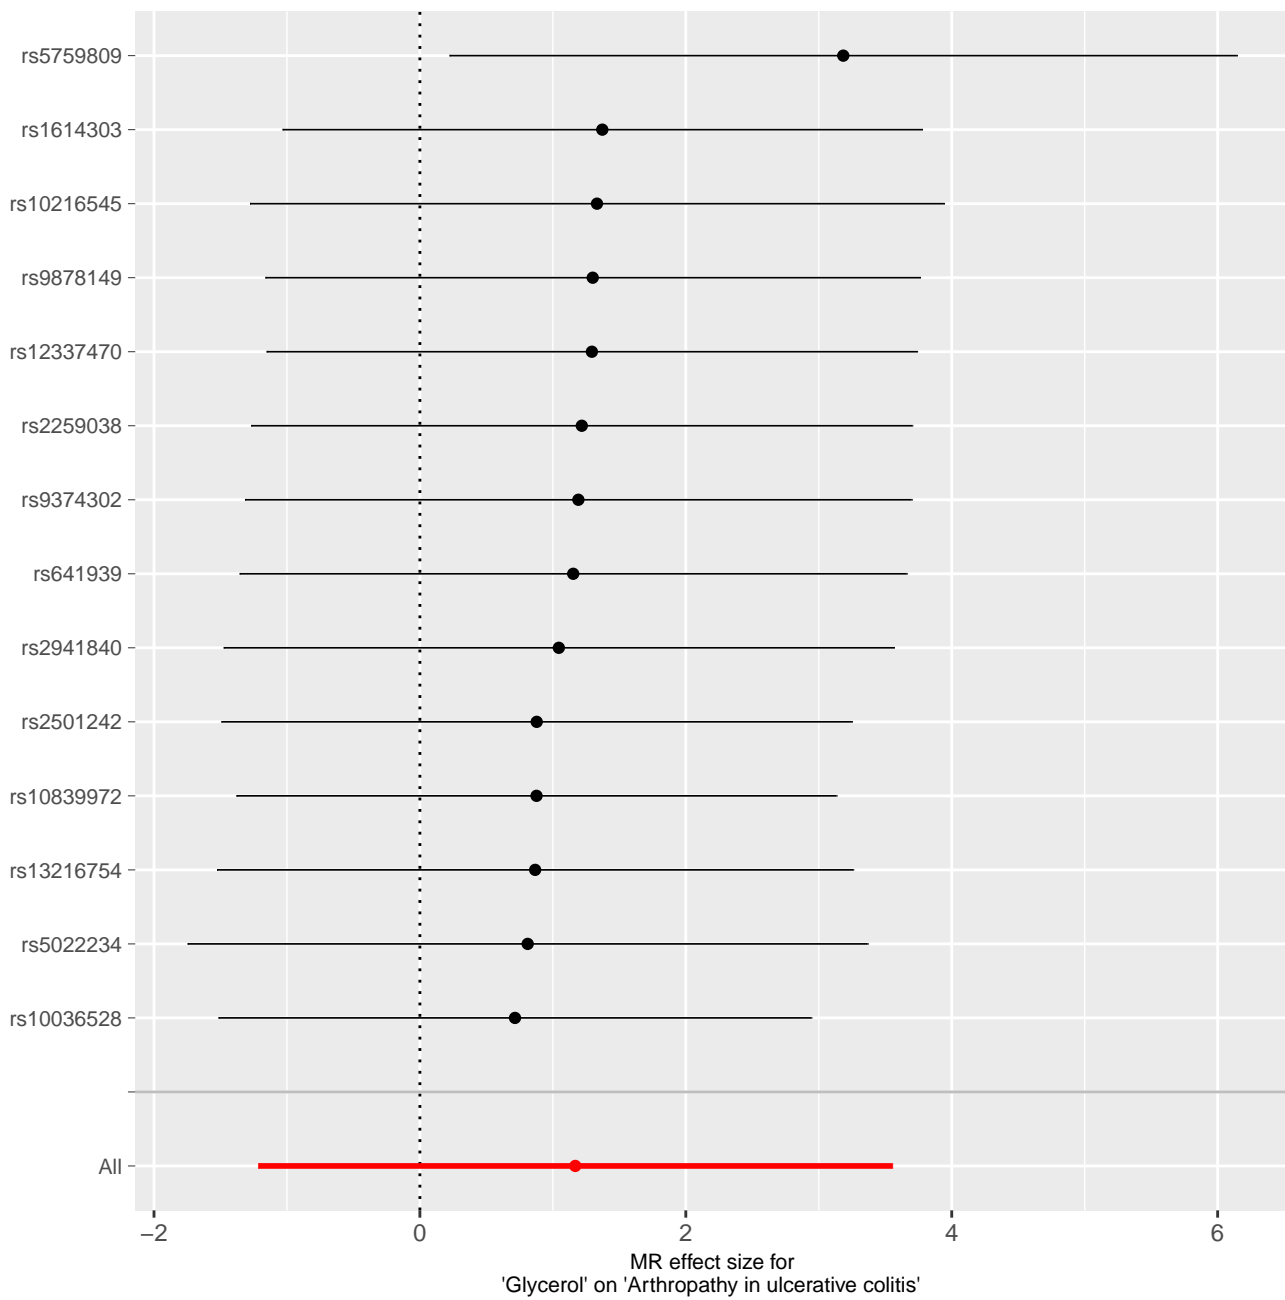

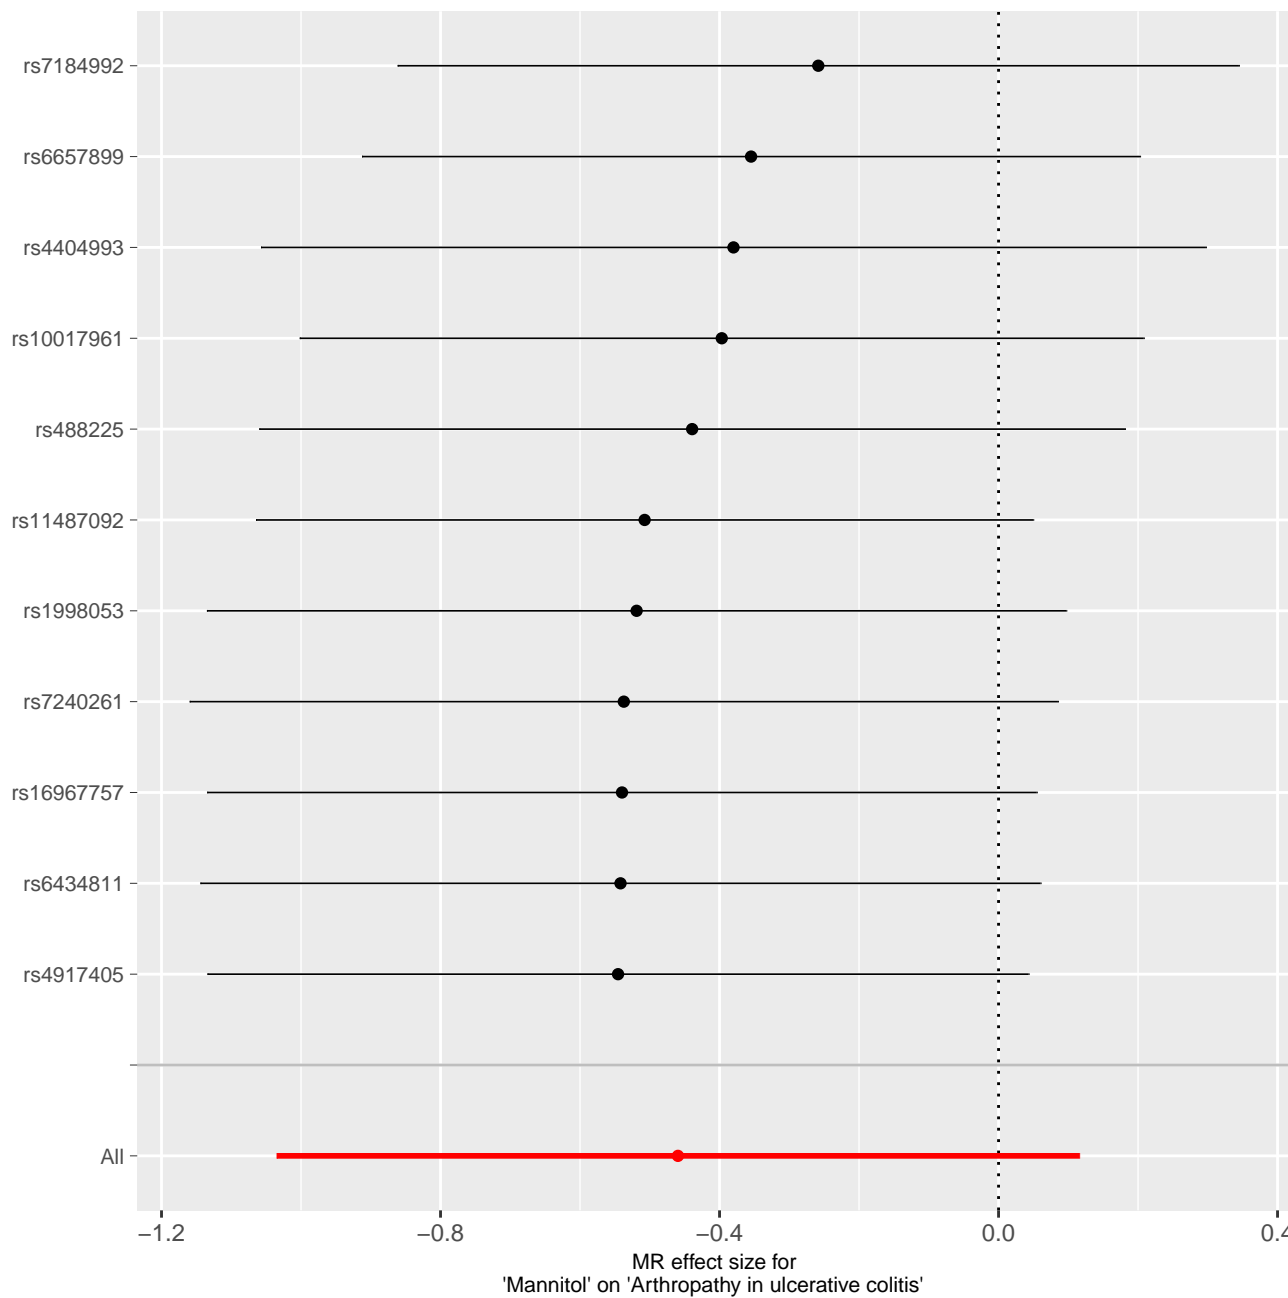

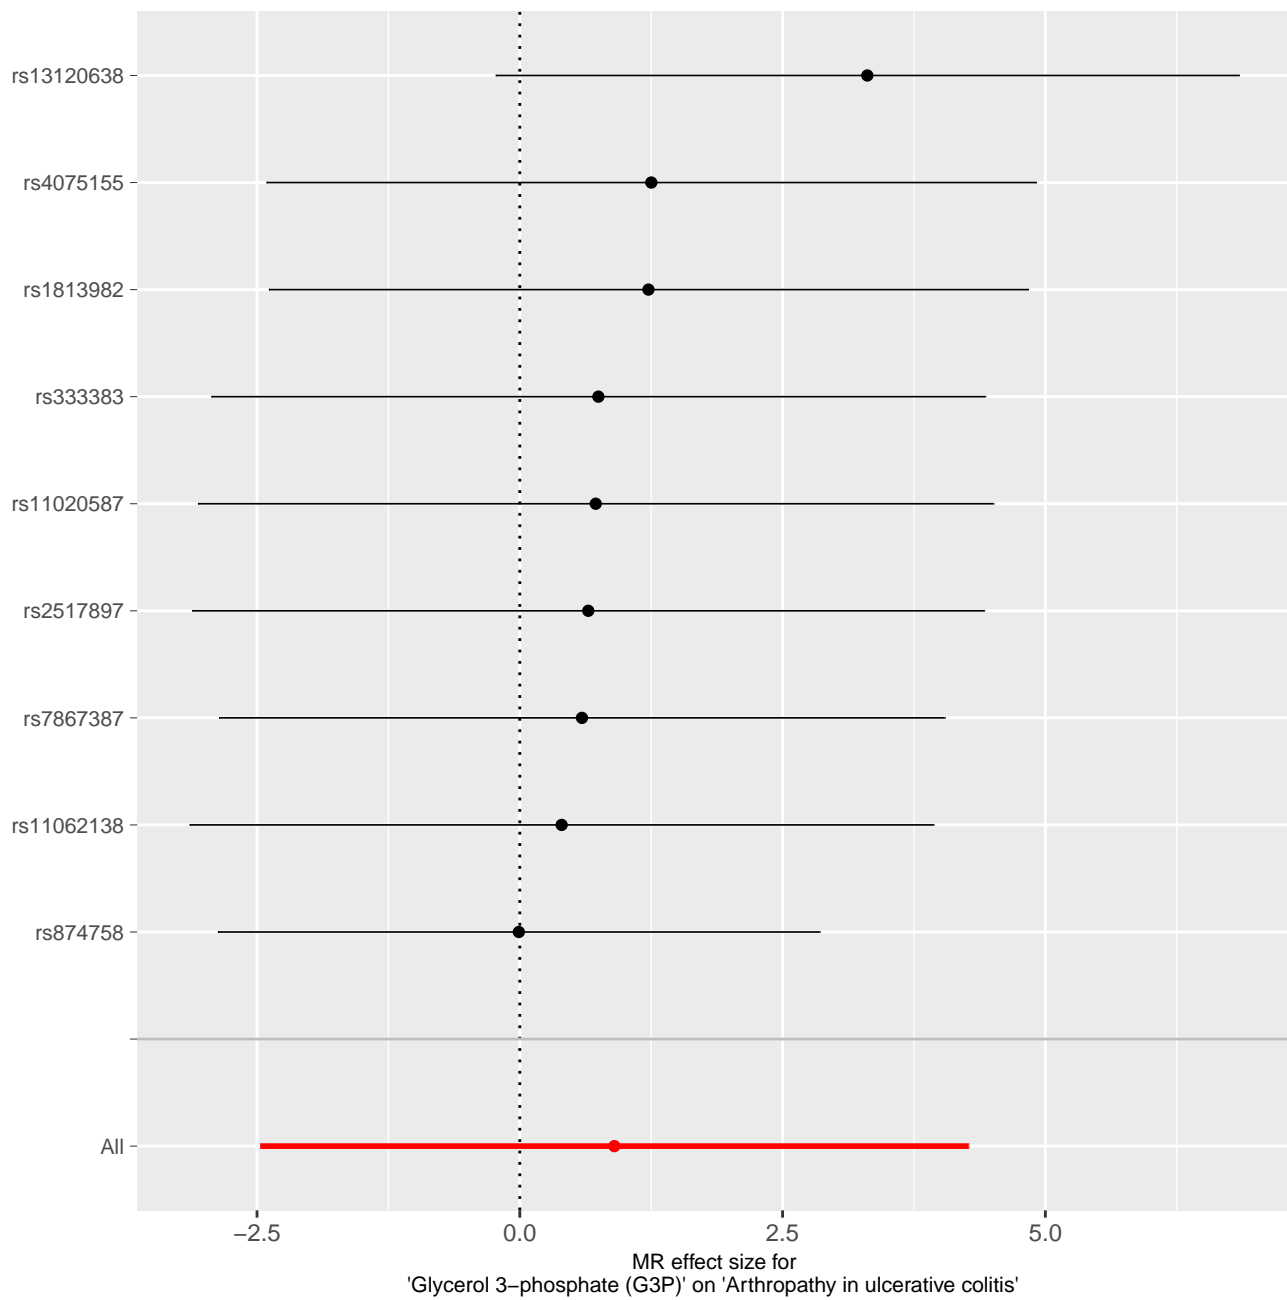



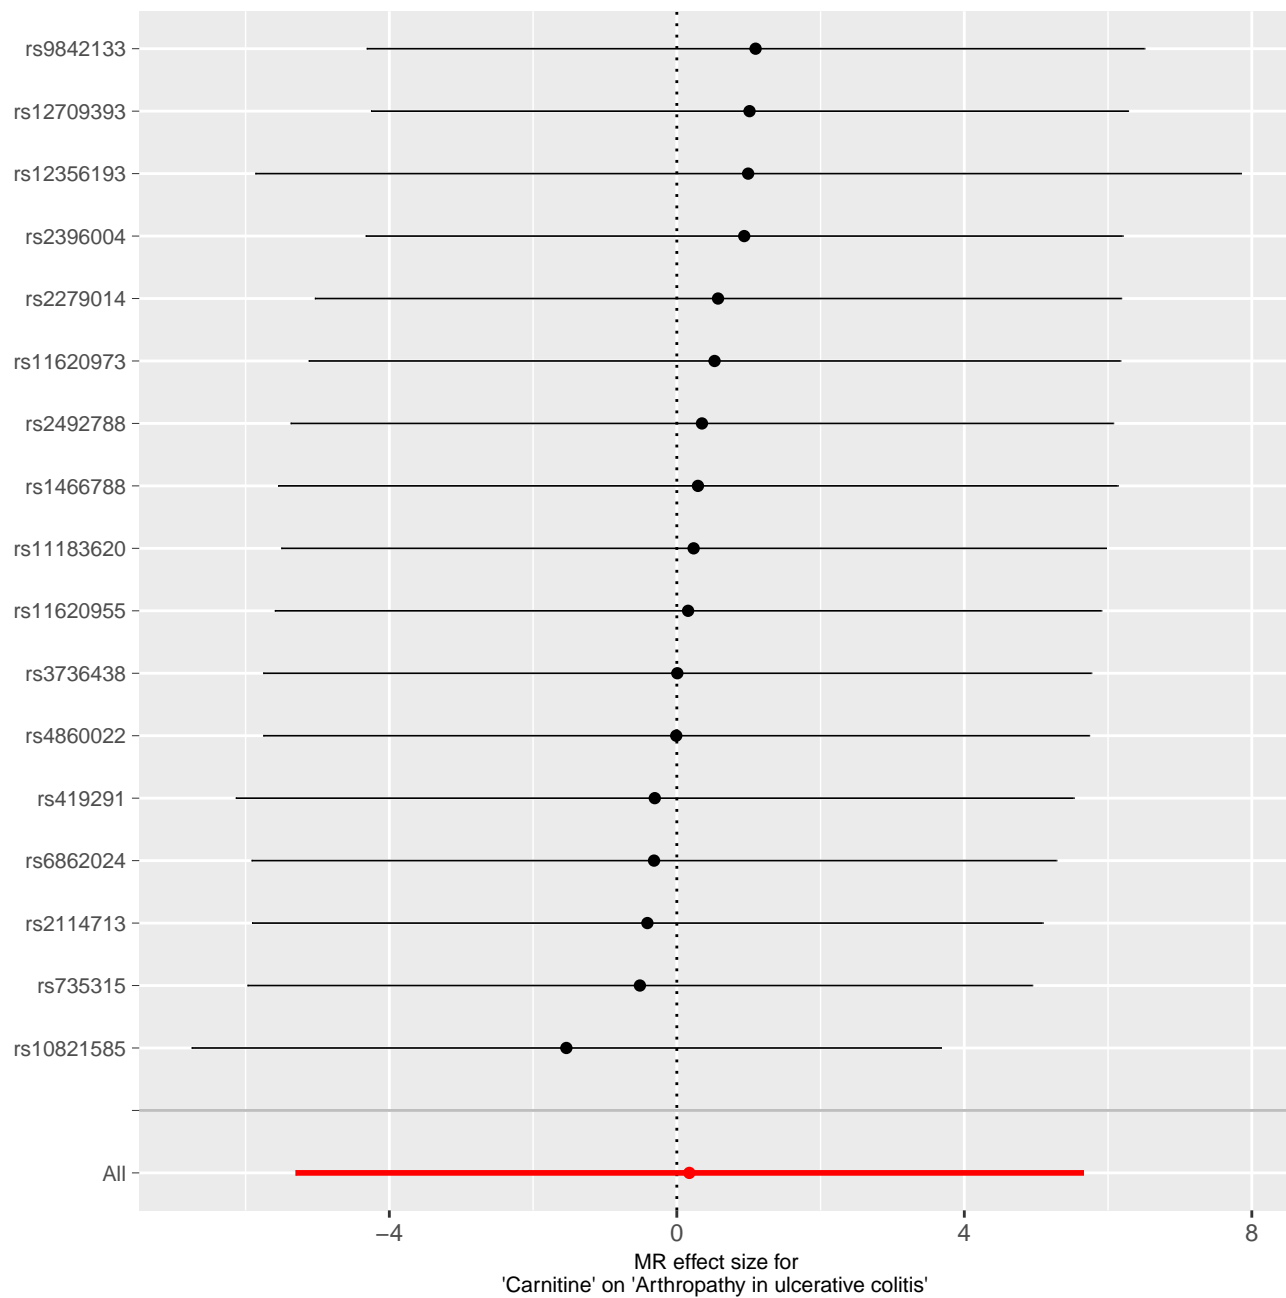

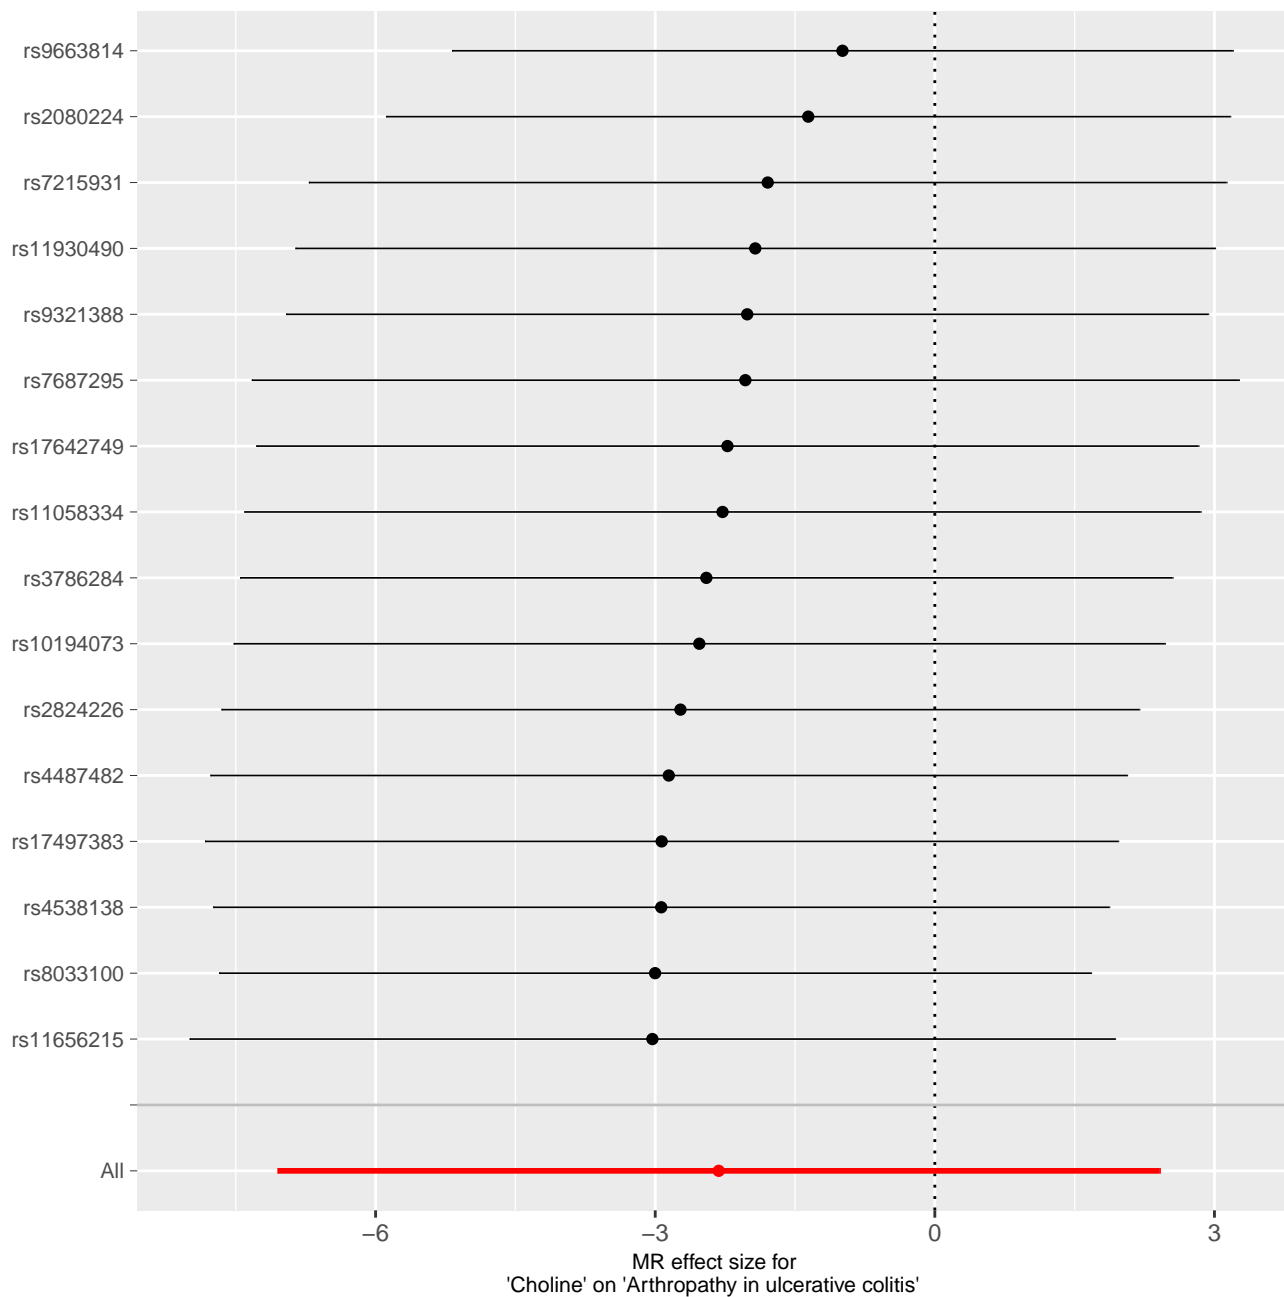

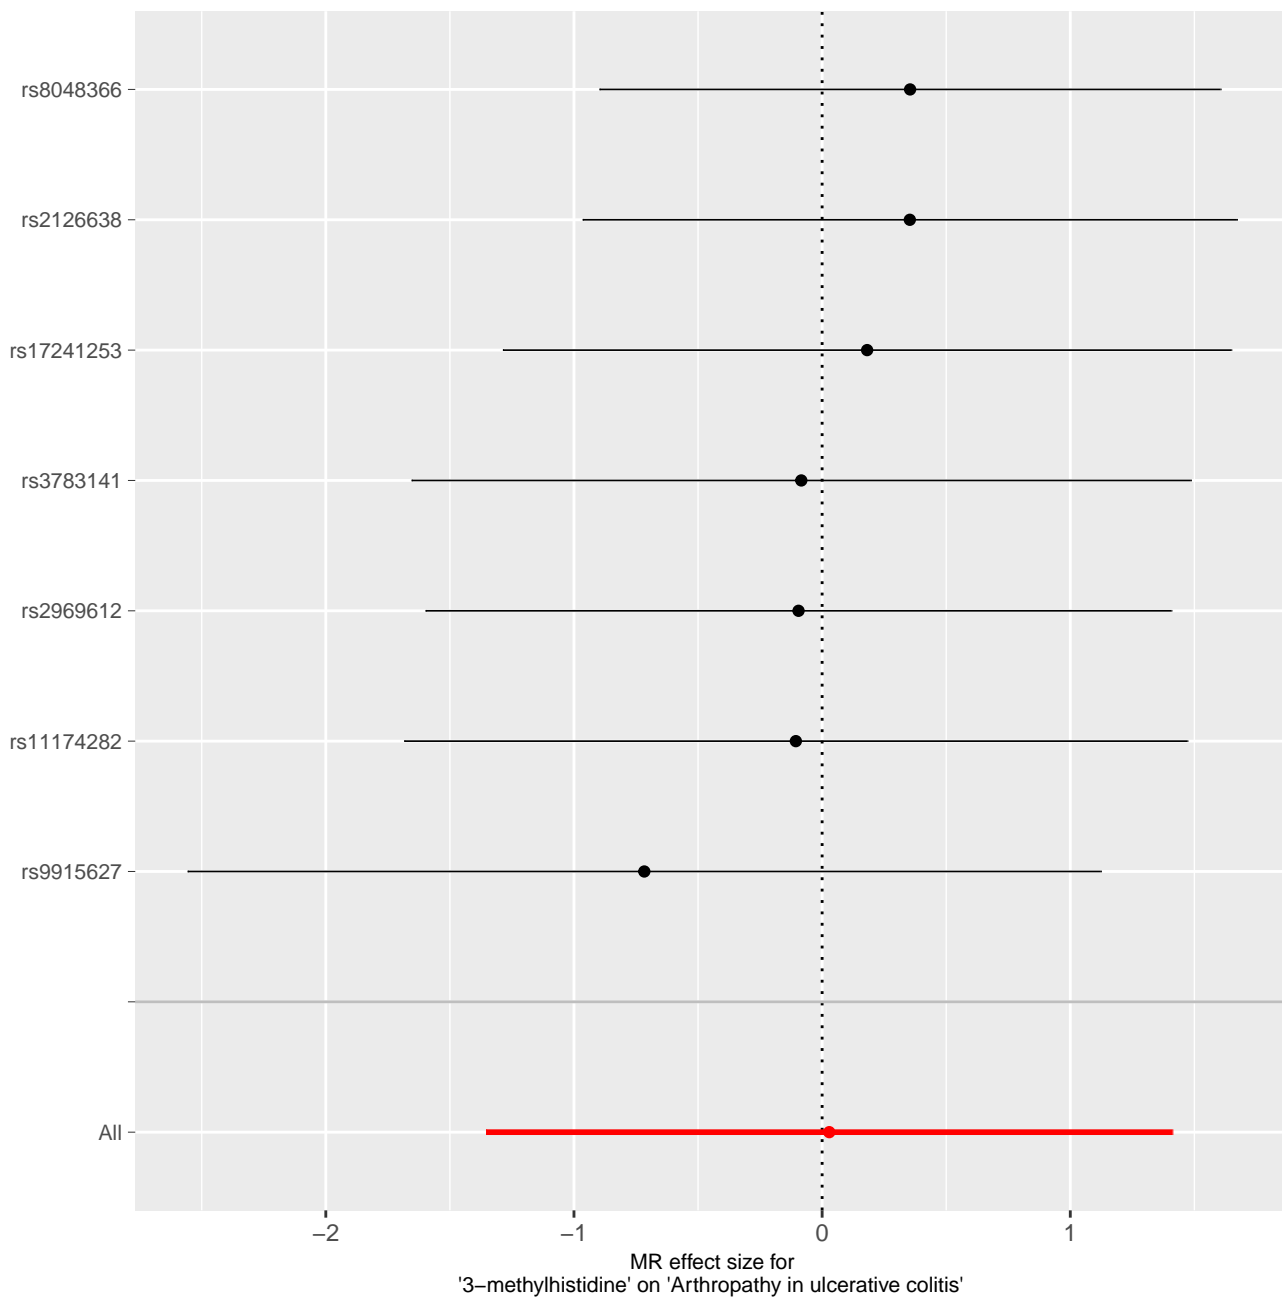

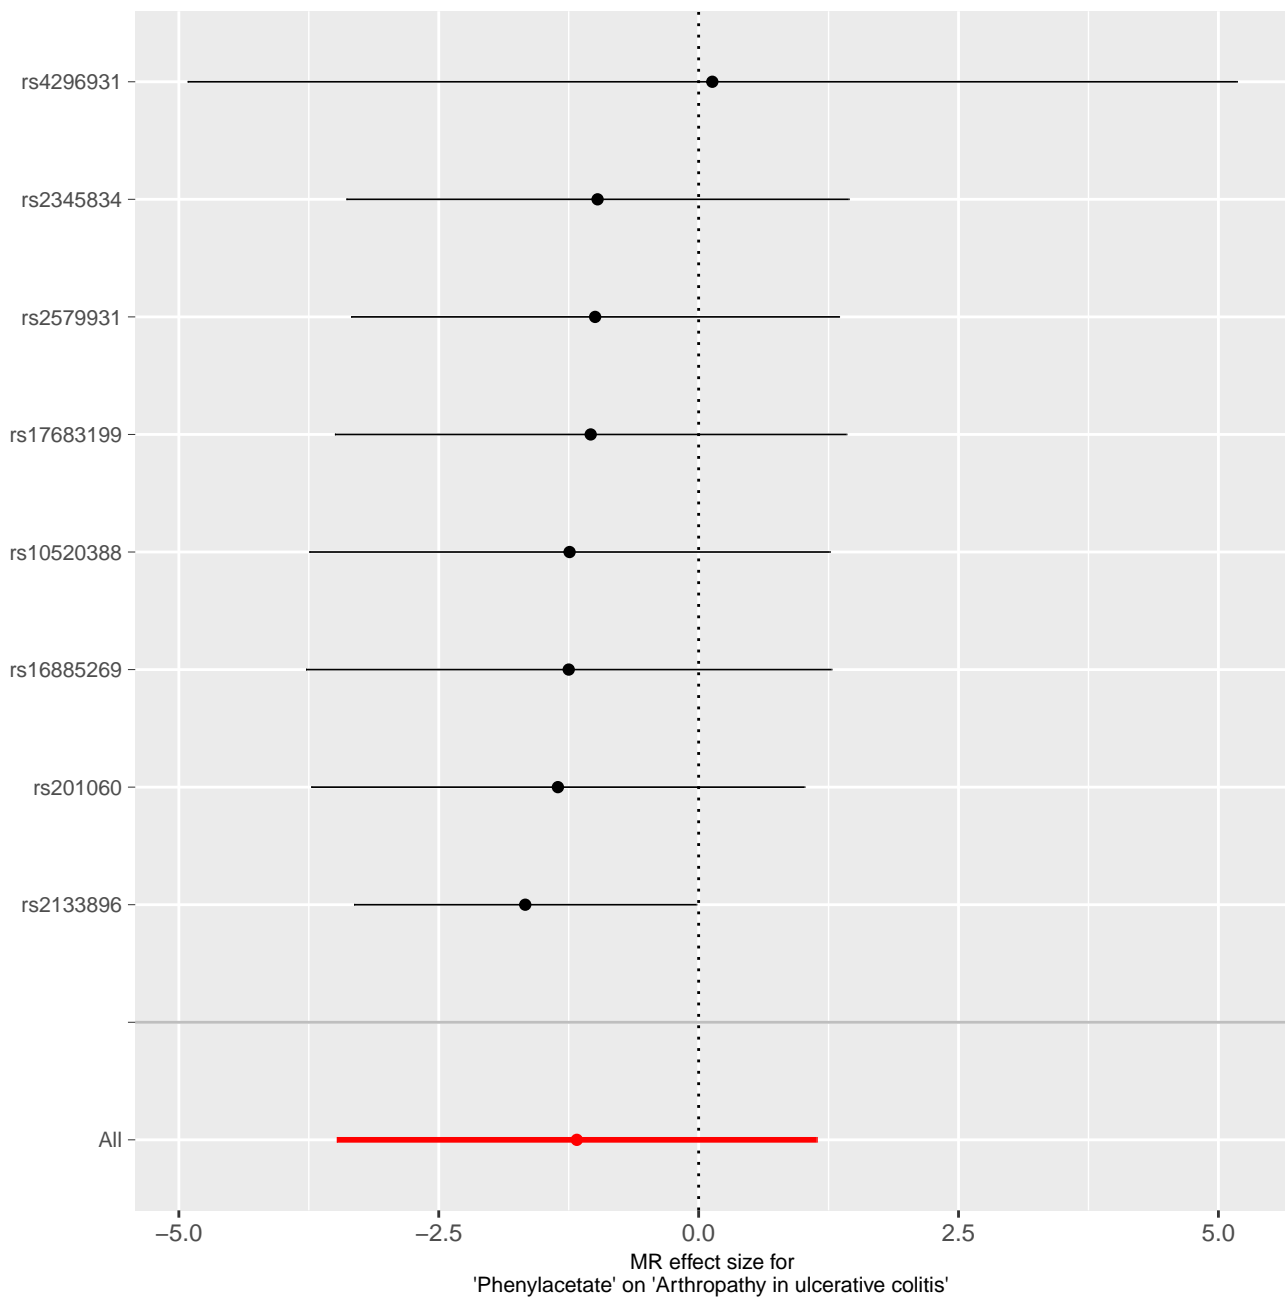

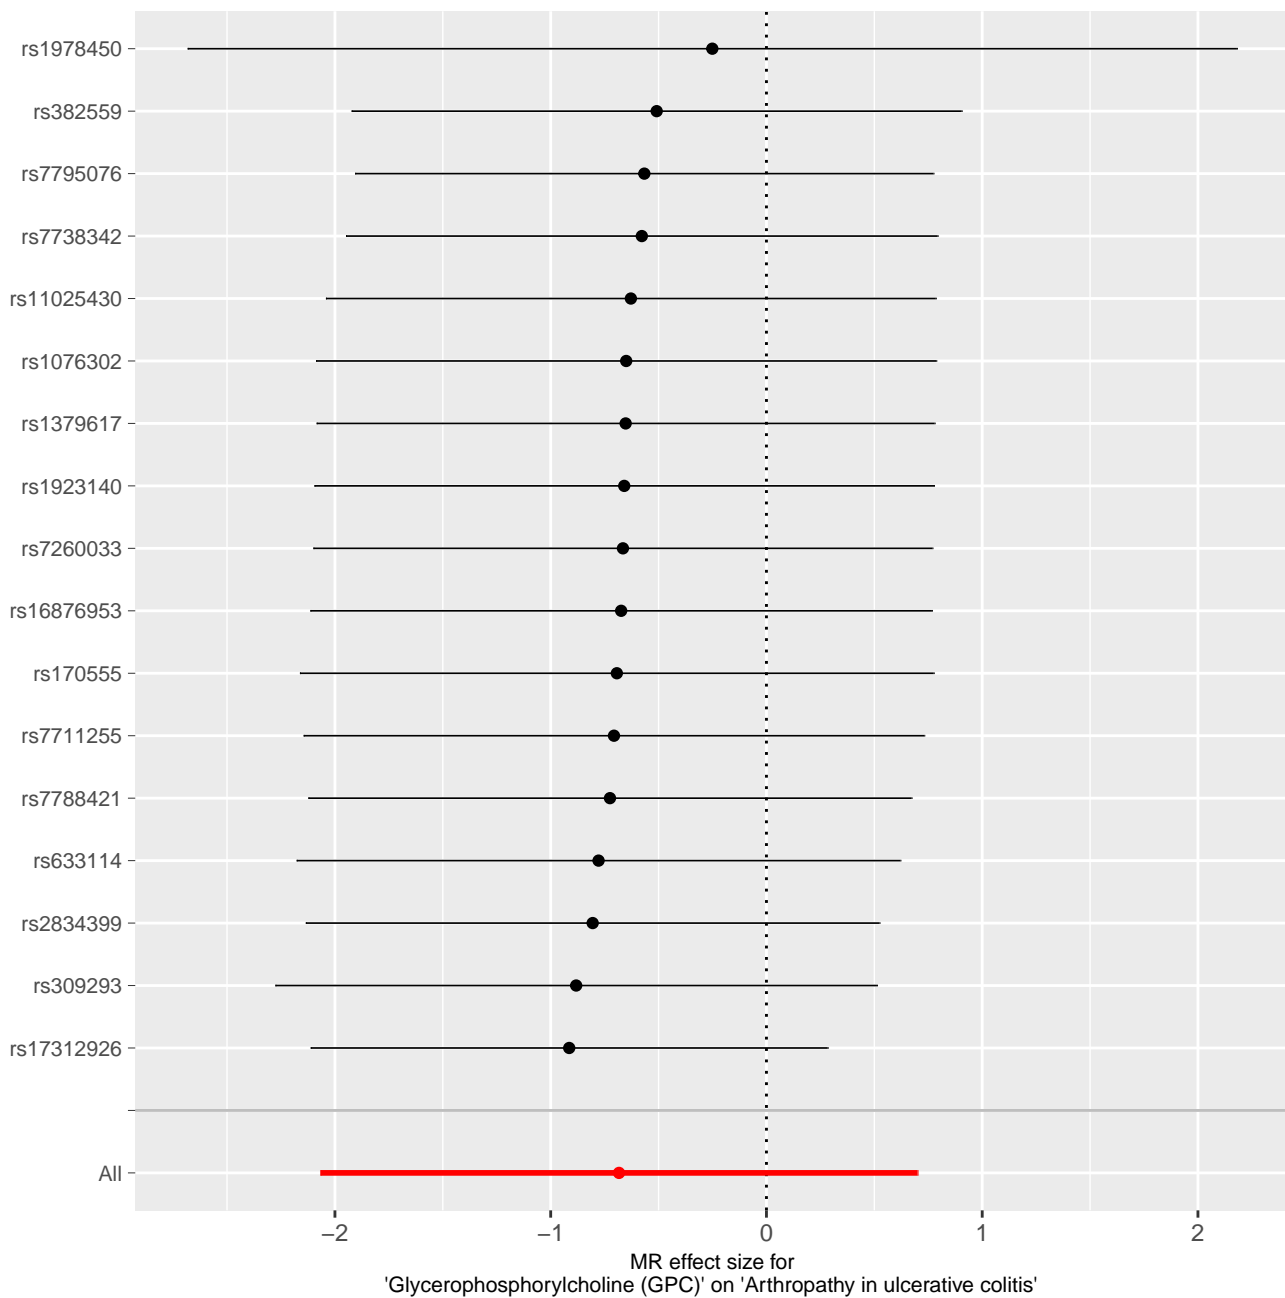

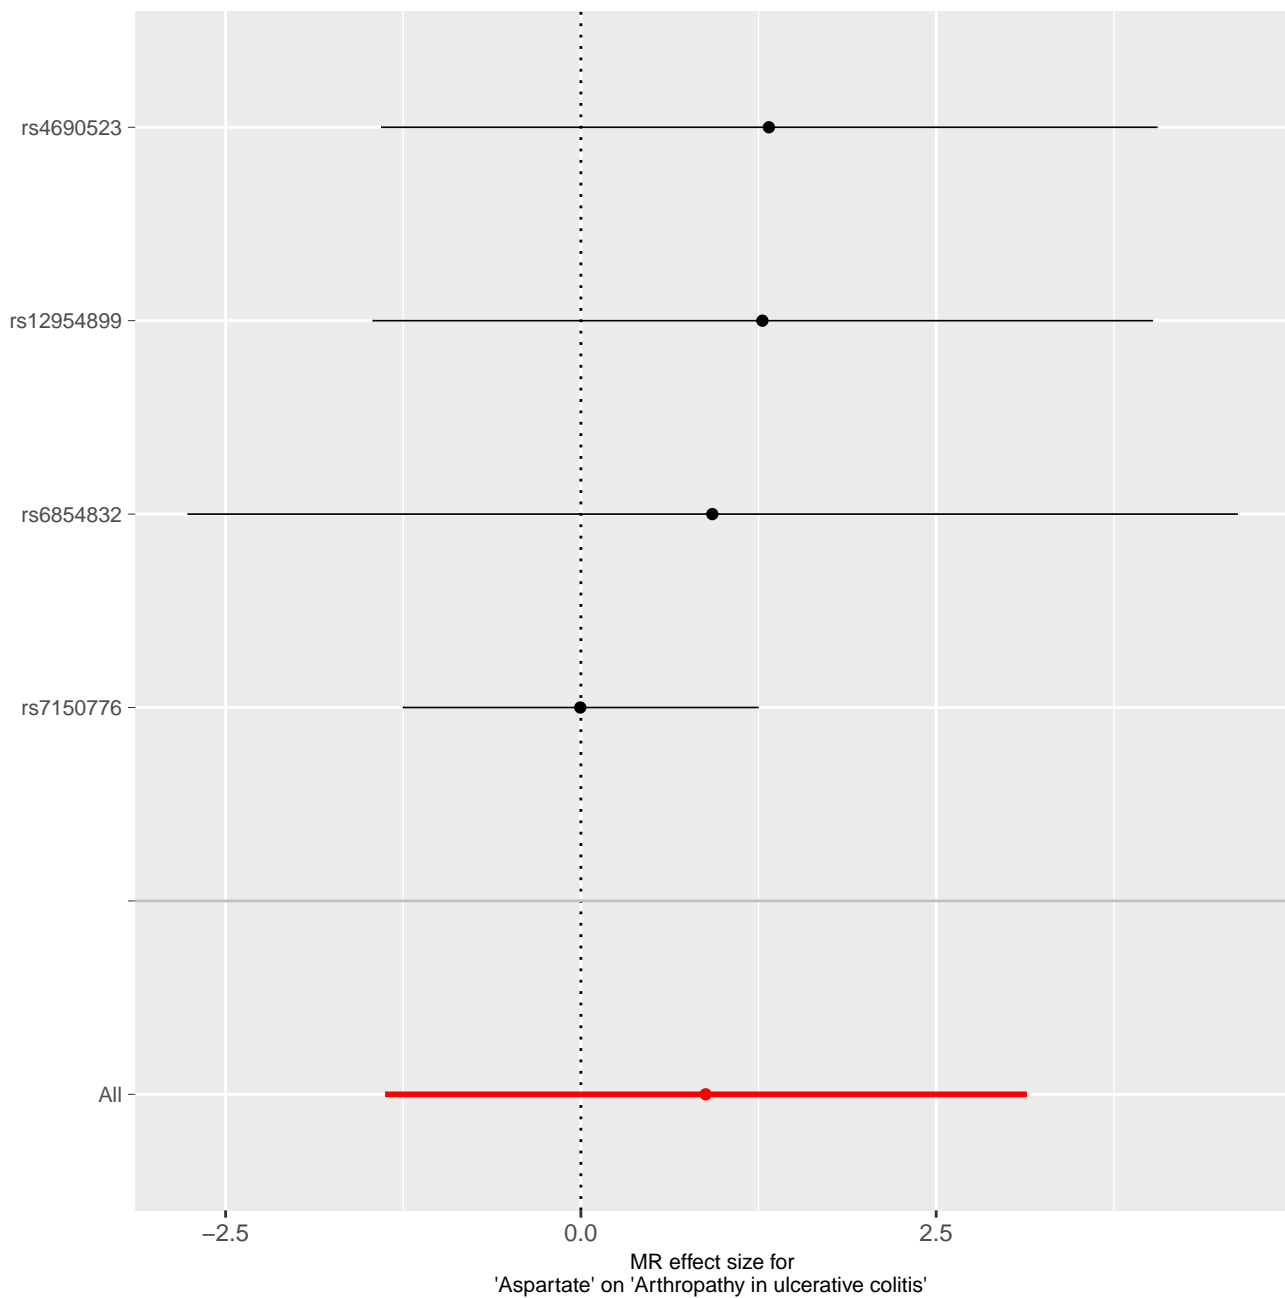

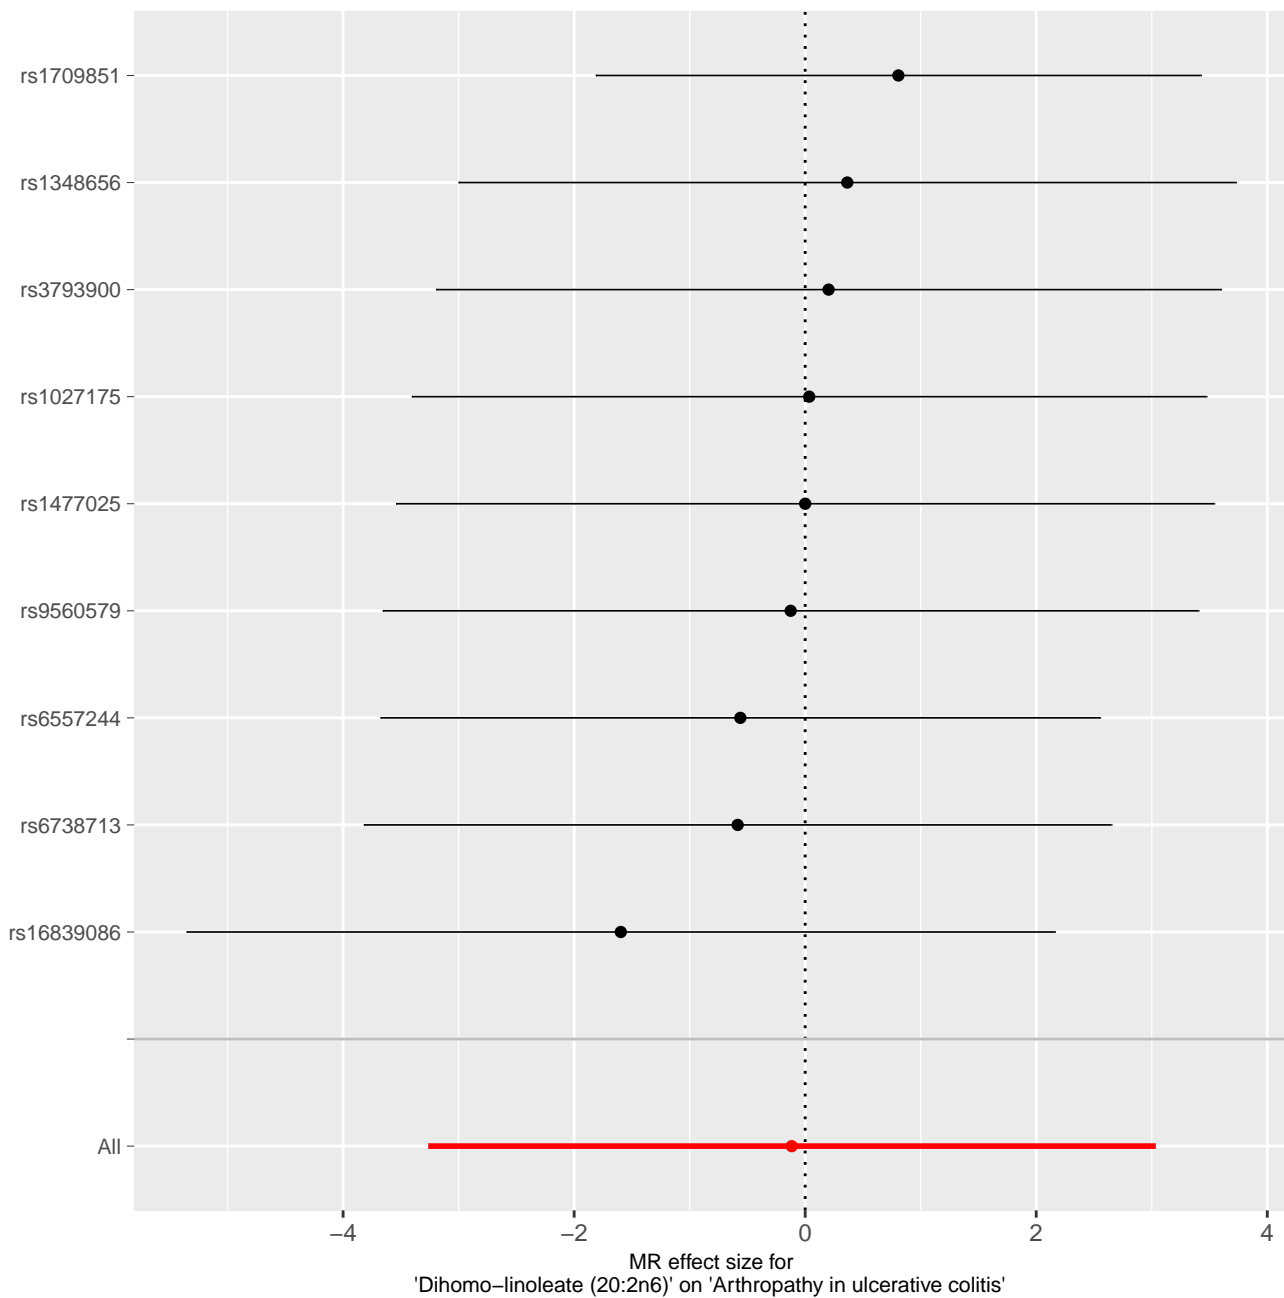

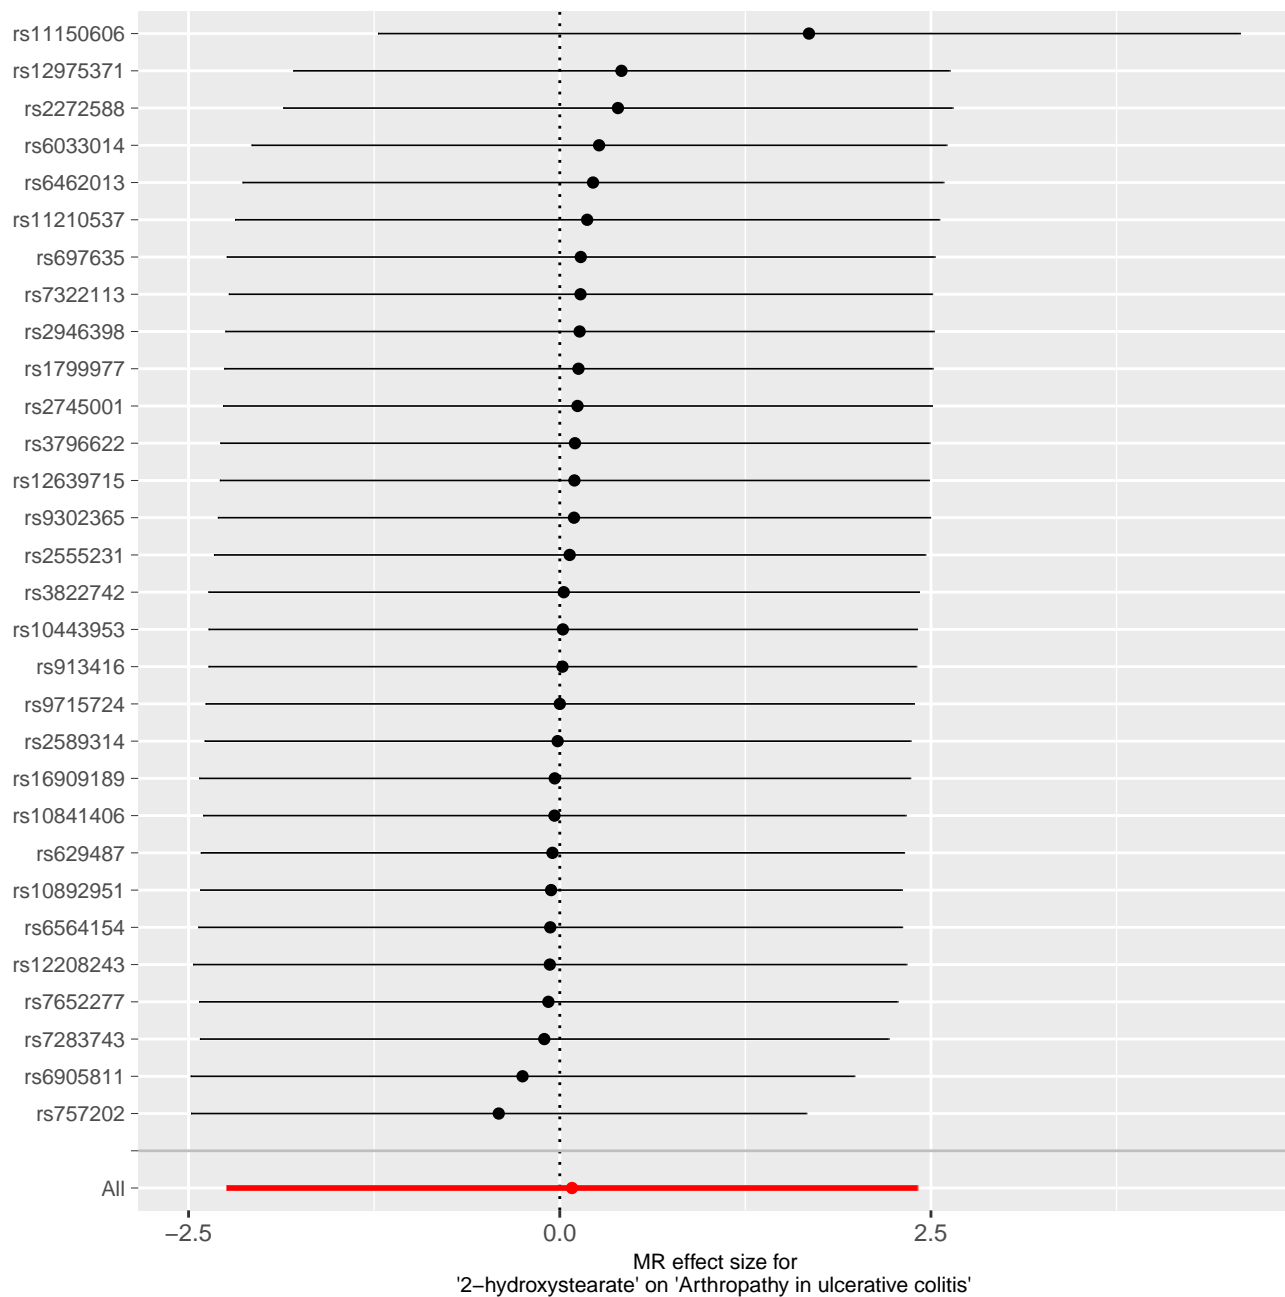



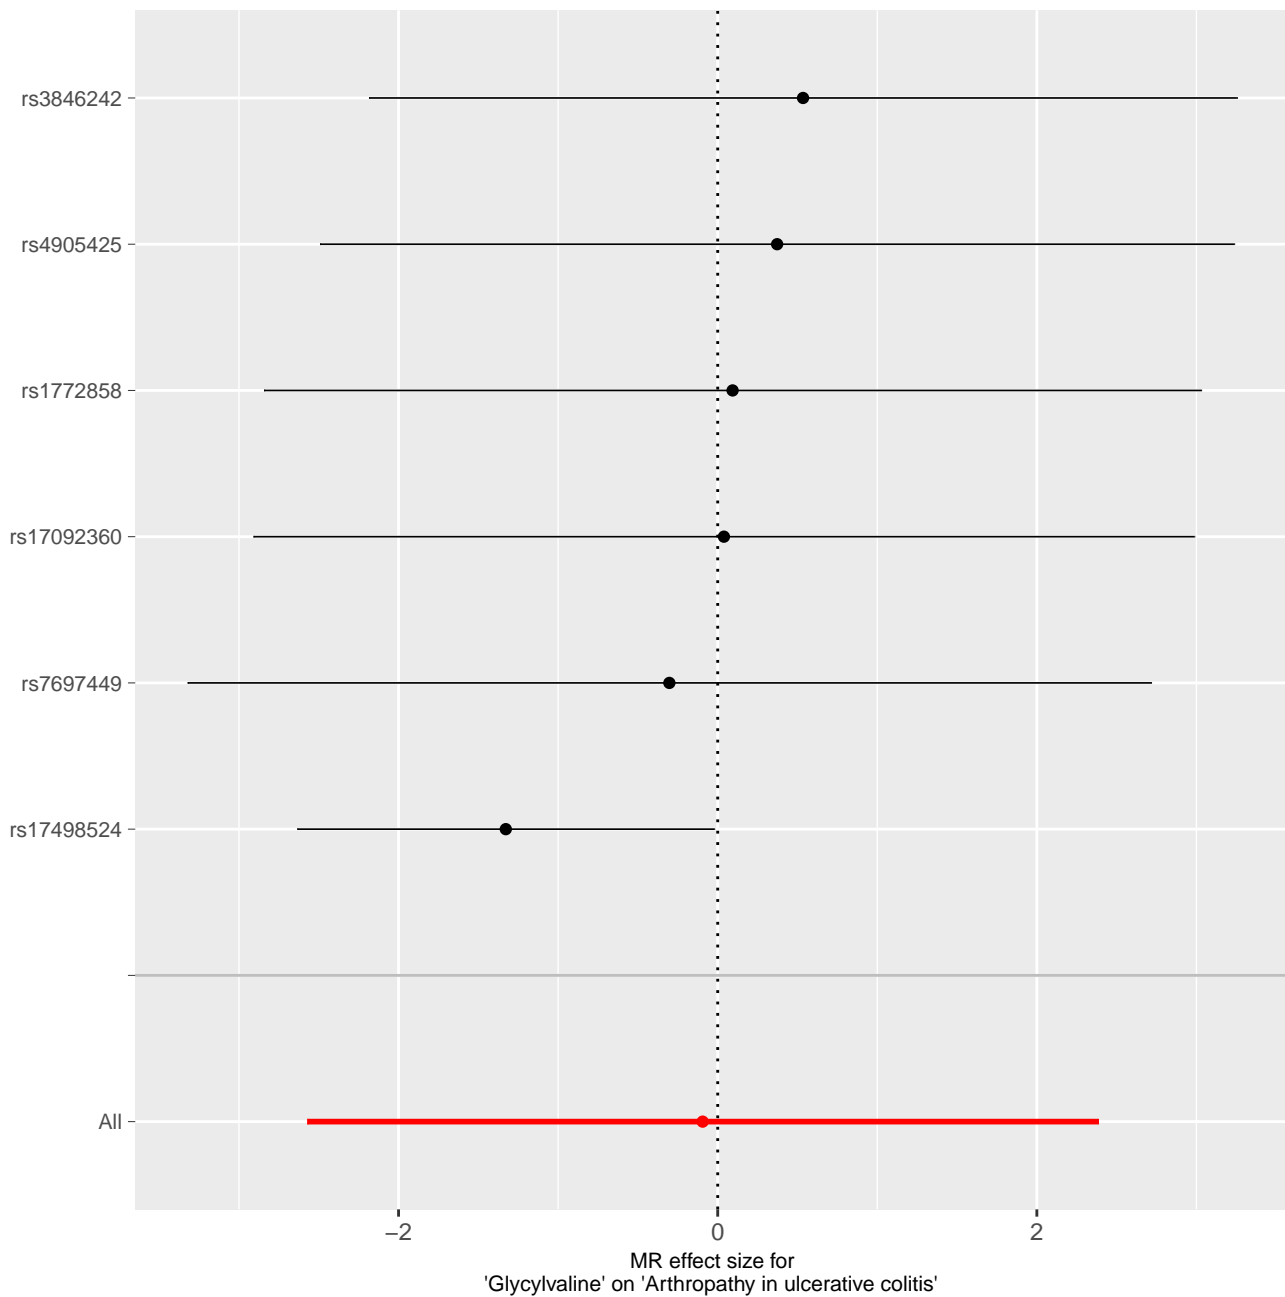

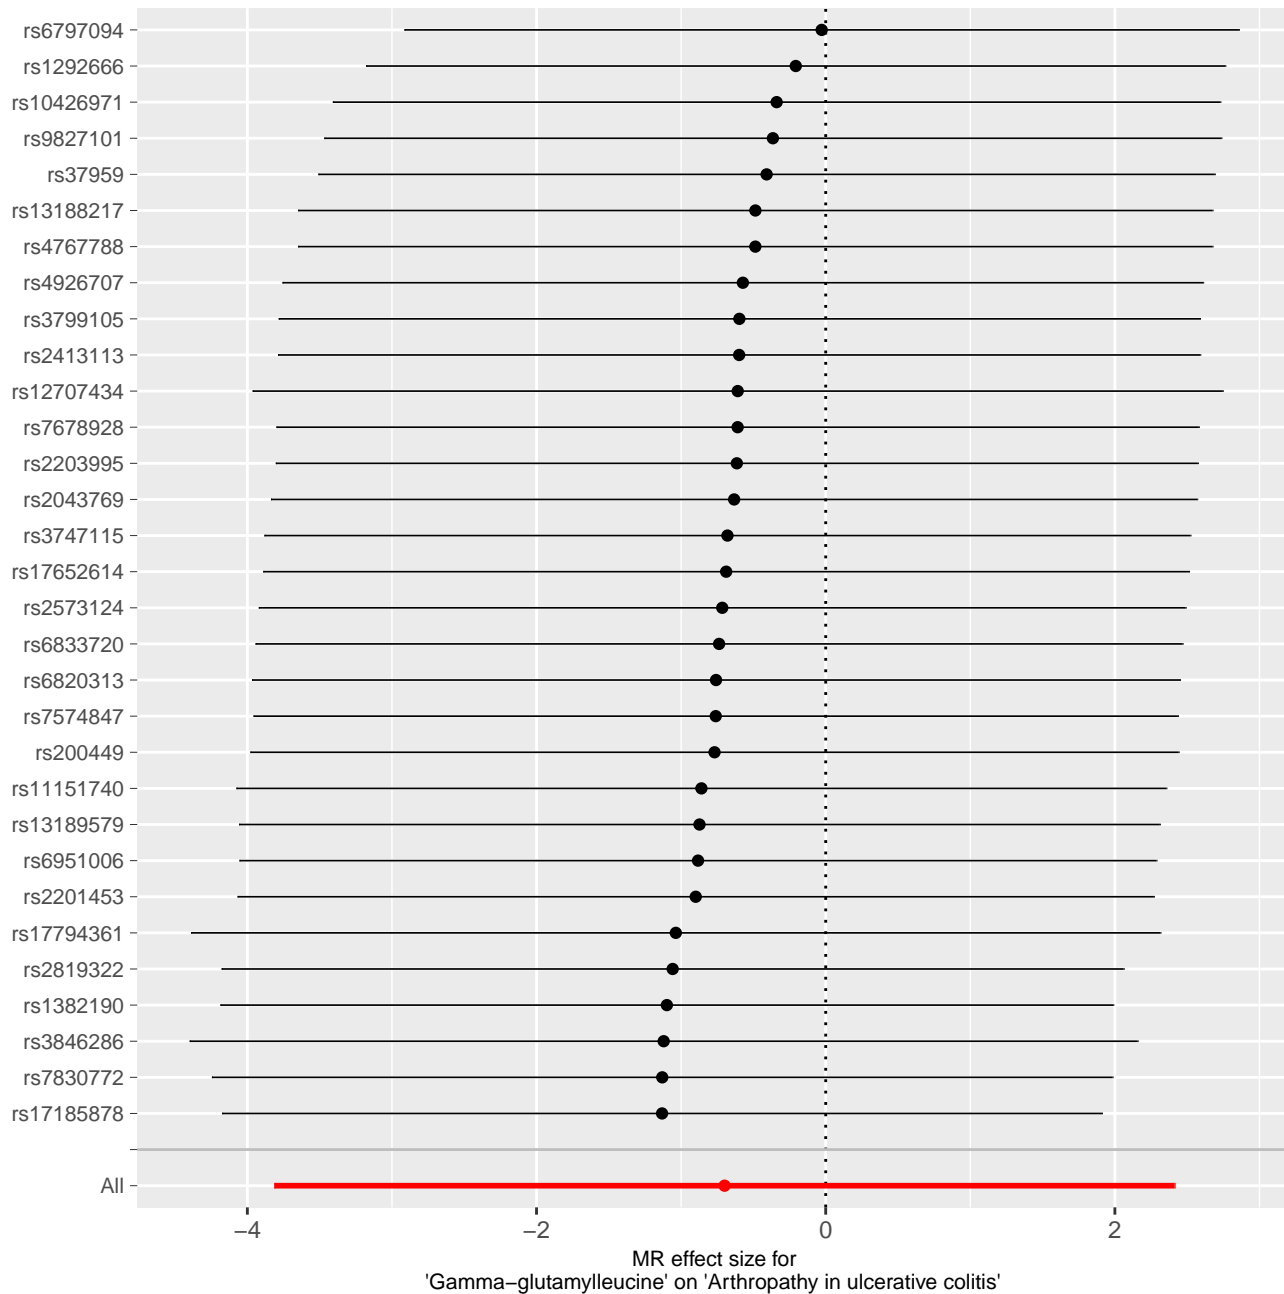

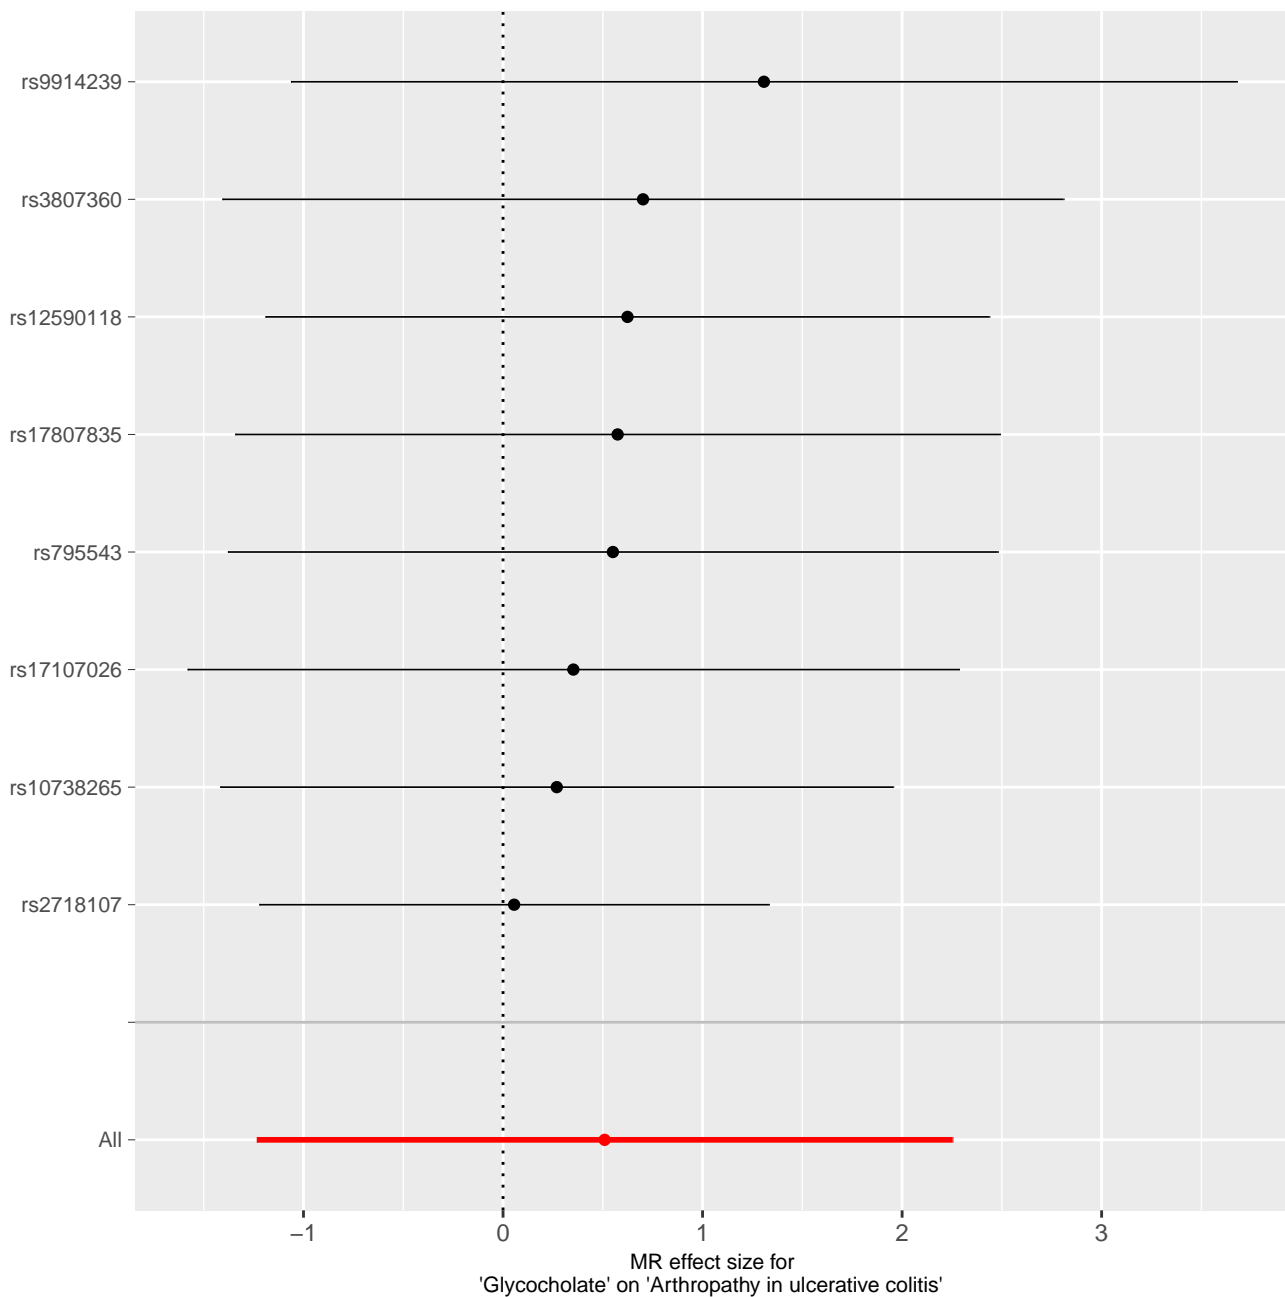

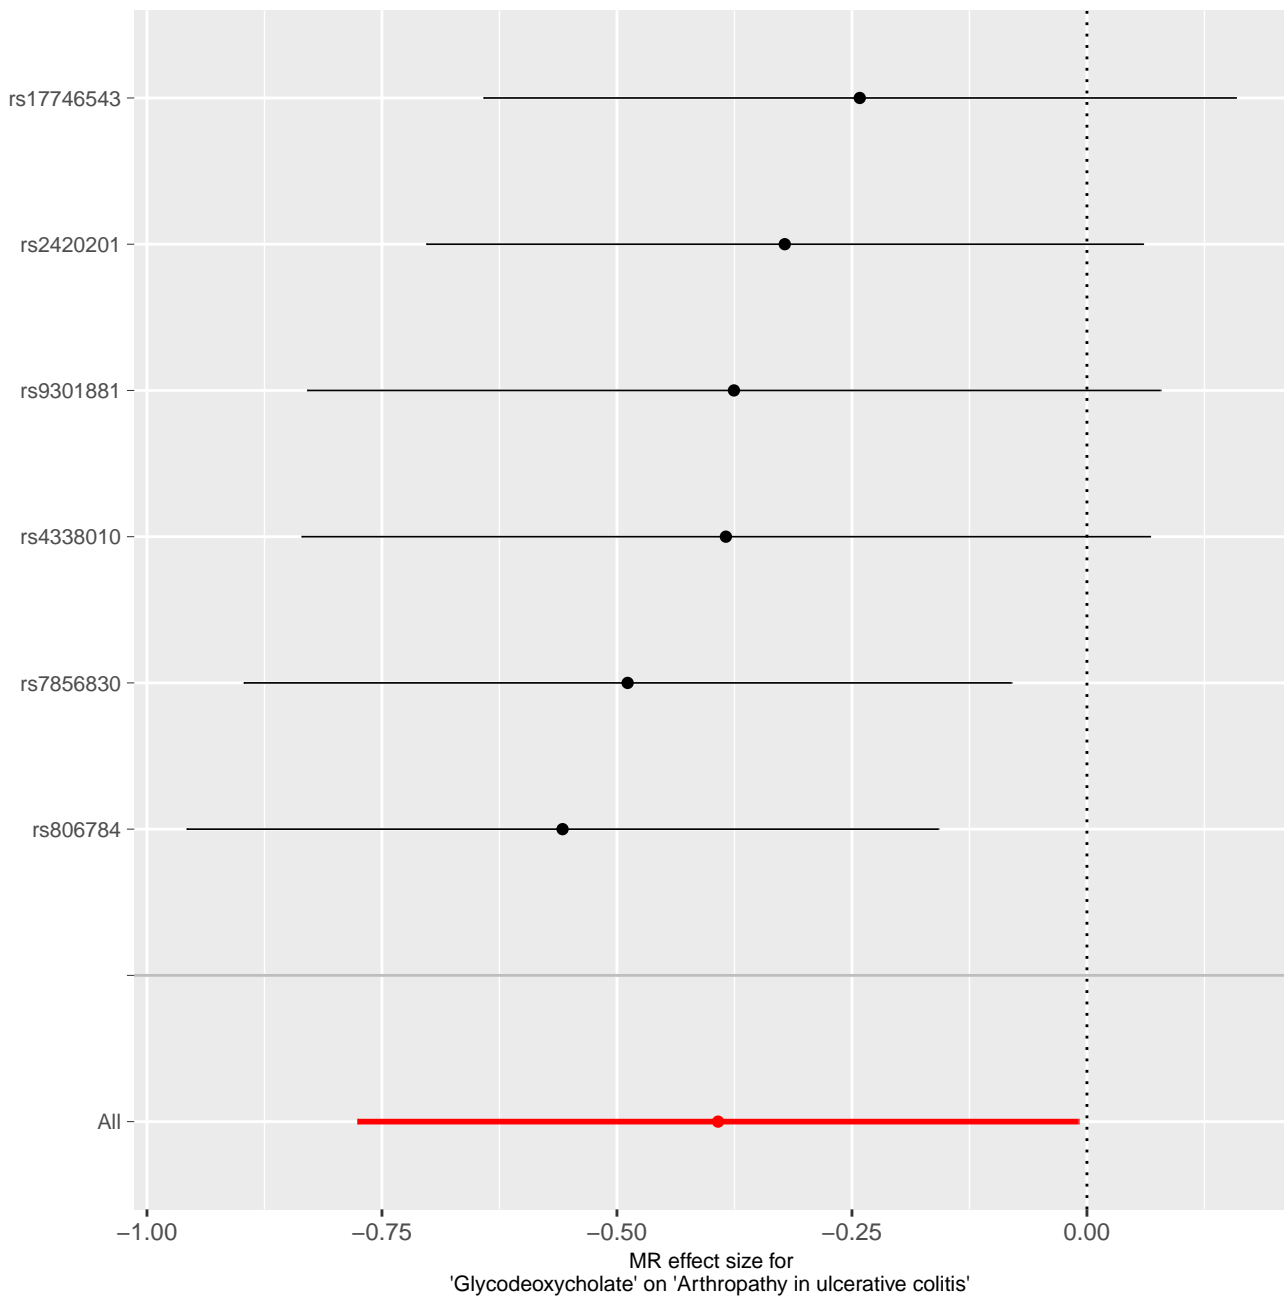

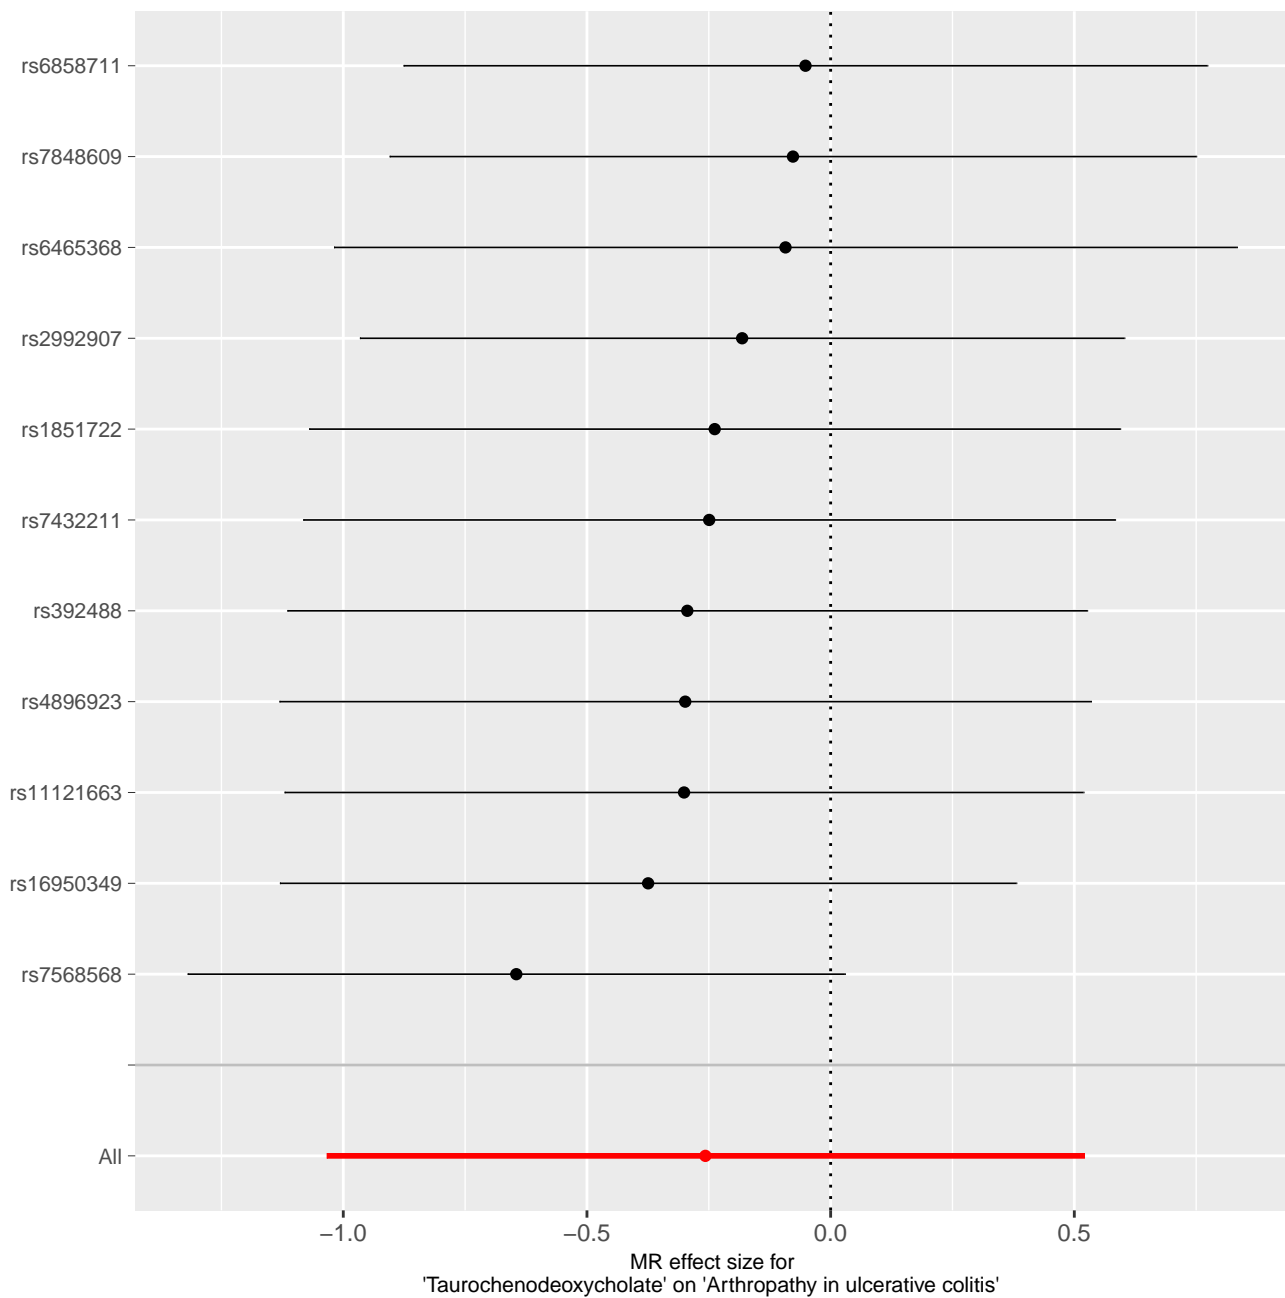

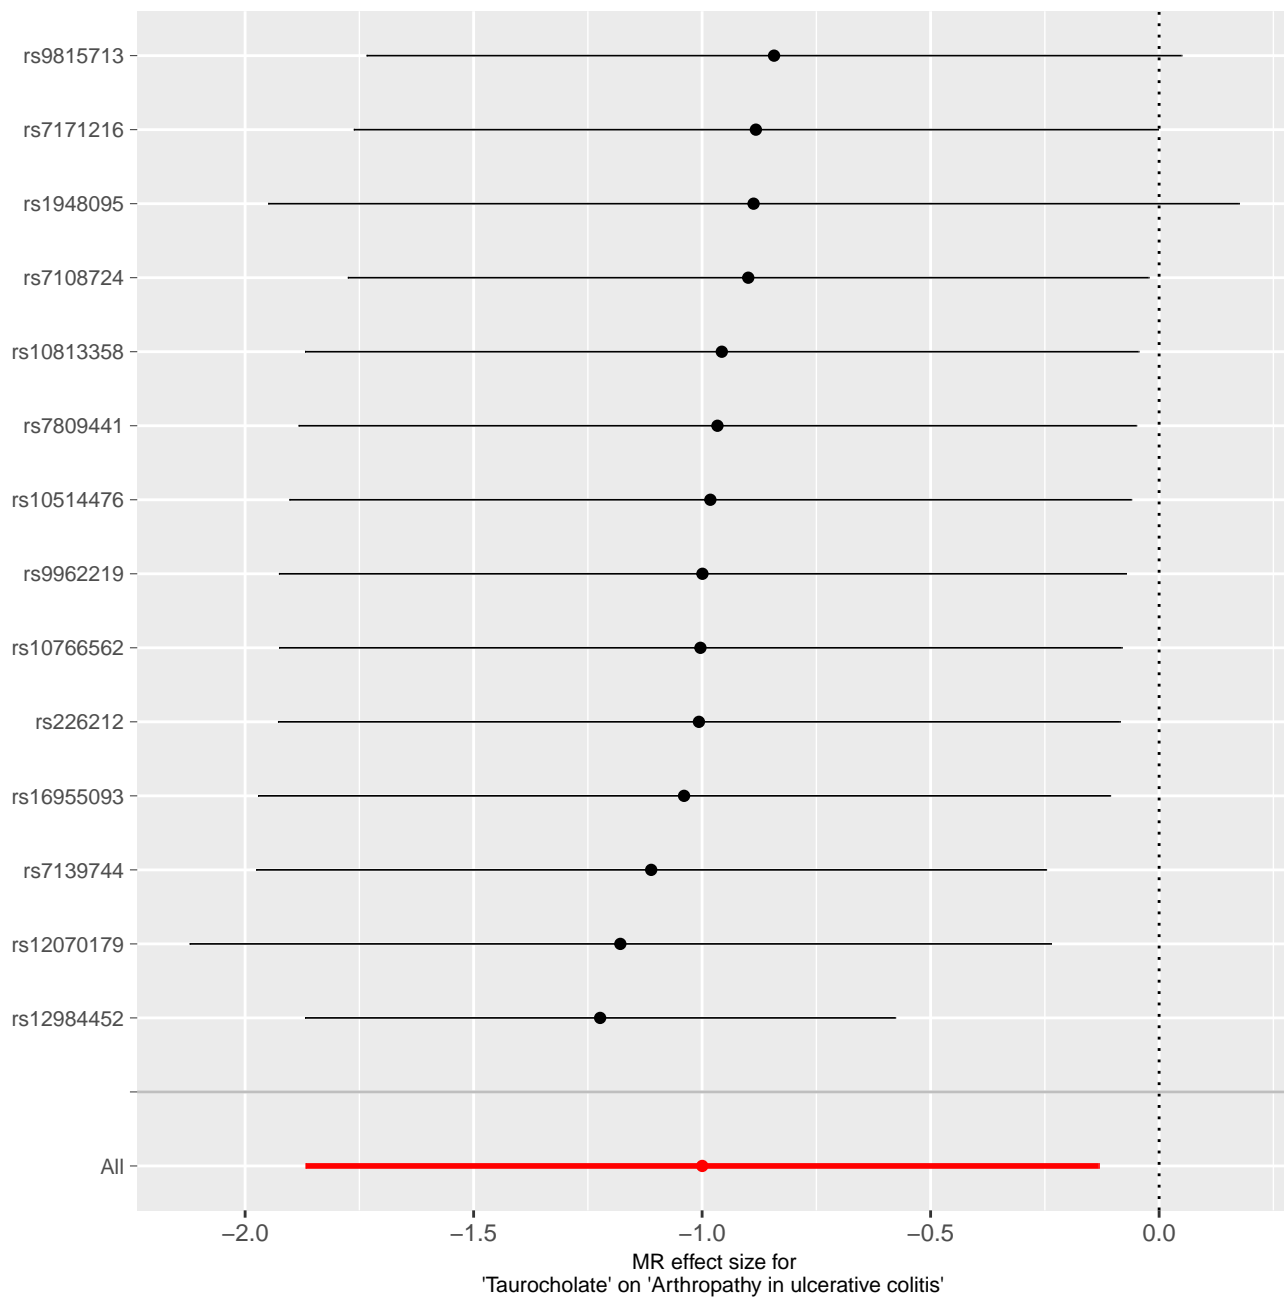

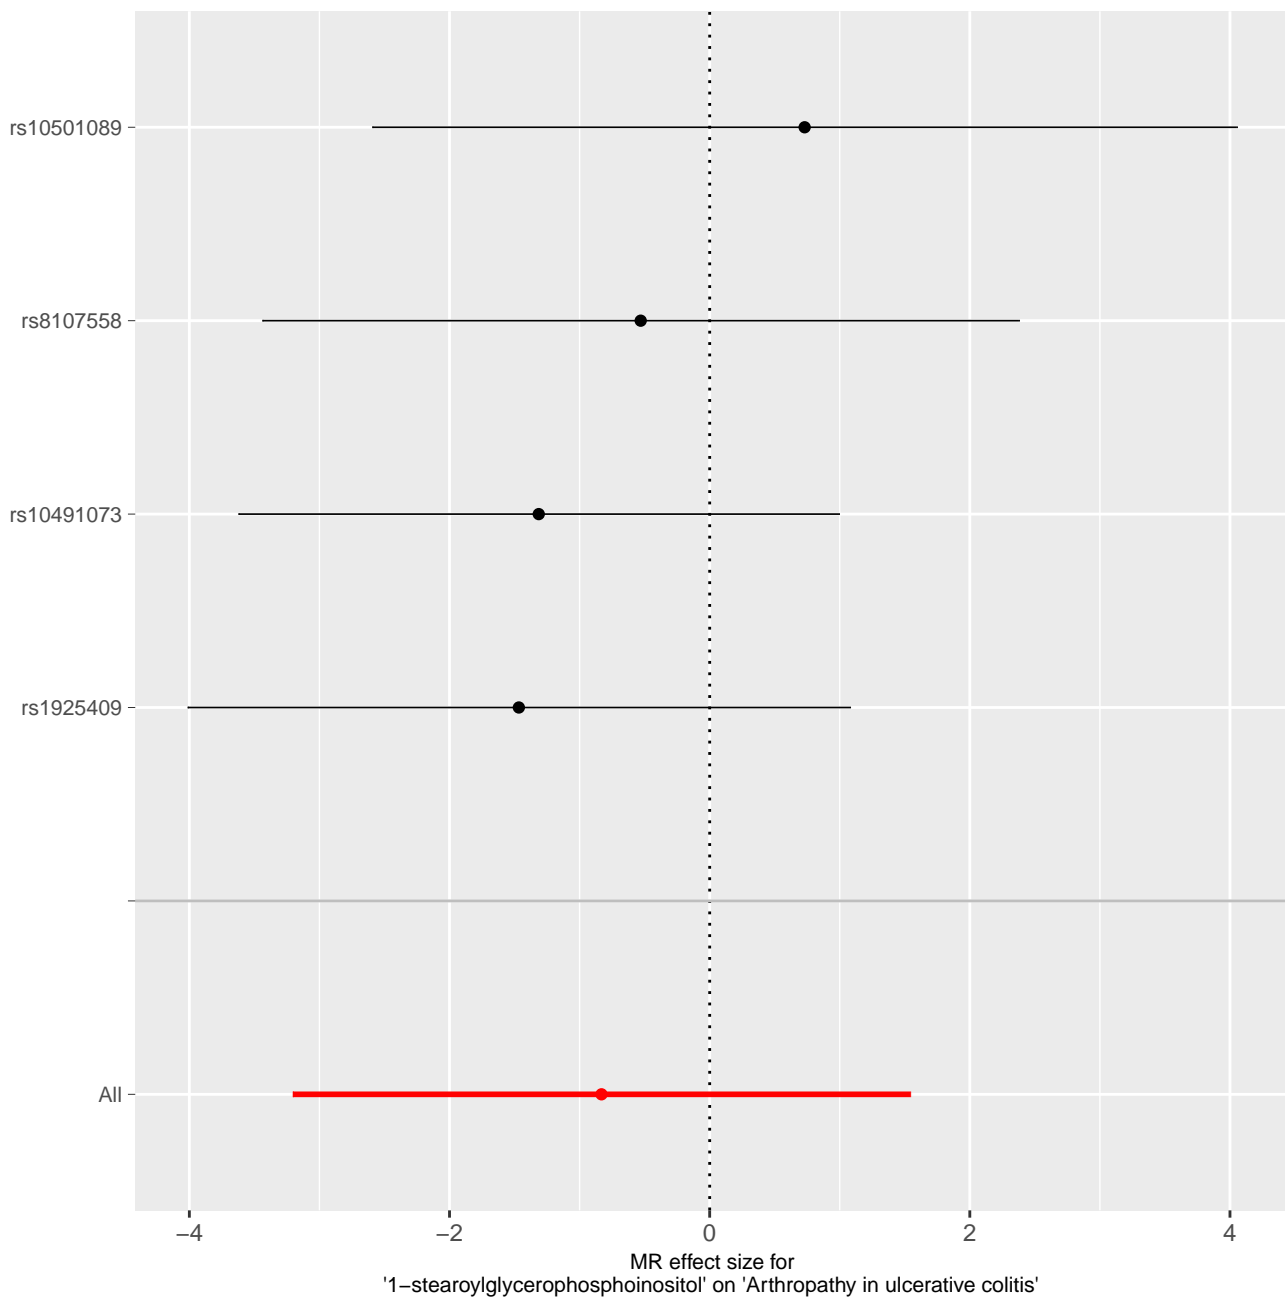

rs7570971

rs9756306

rs3800993

All

-5

0

5

10

MR effect size for  
'1,5-anhydroglucitol (1,5-AG)' on 'Arthropathy in ulcerative colitis'

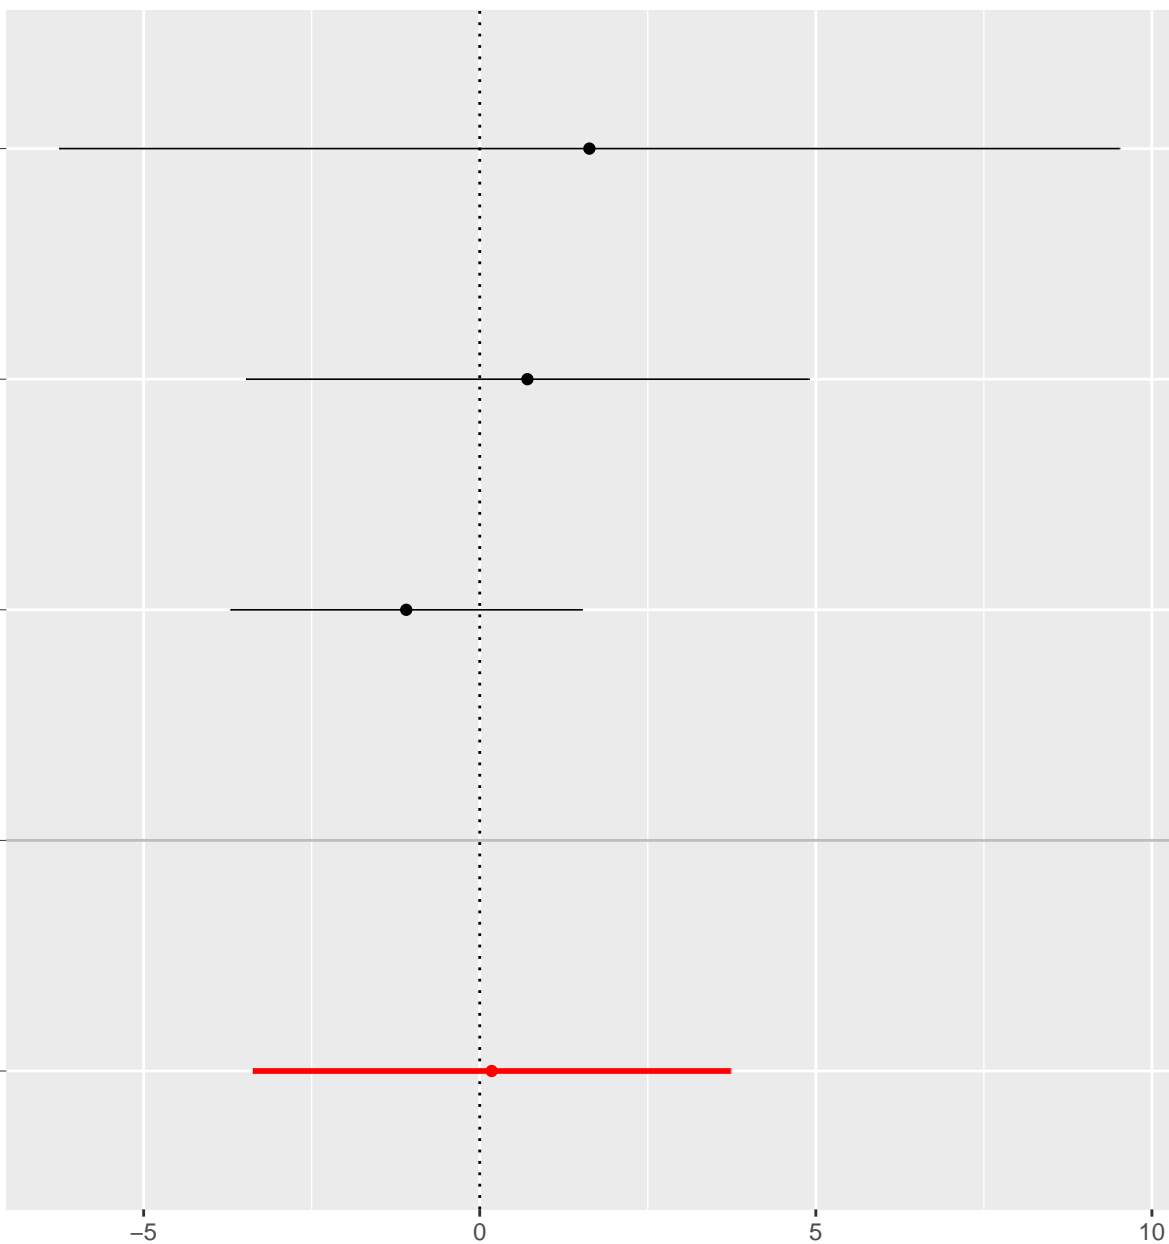



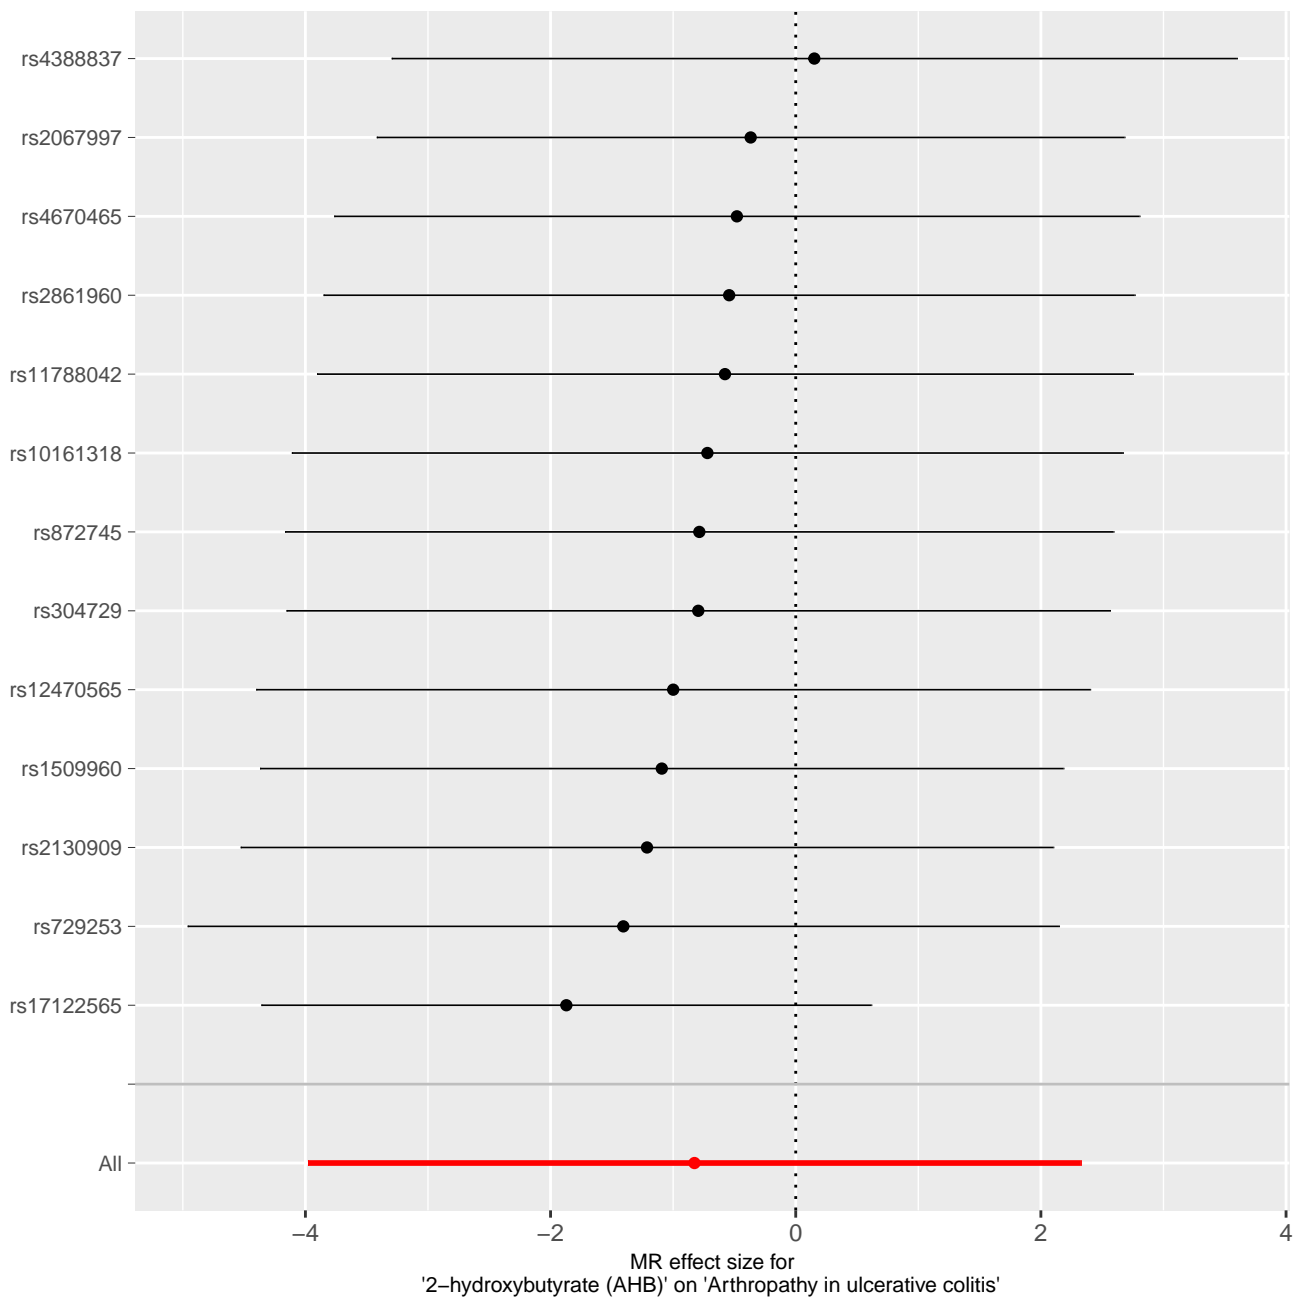

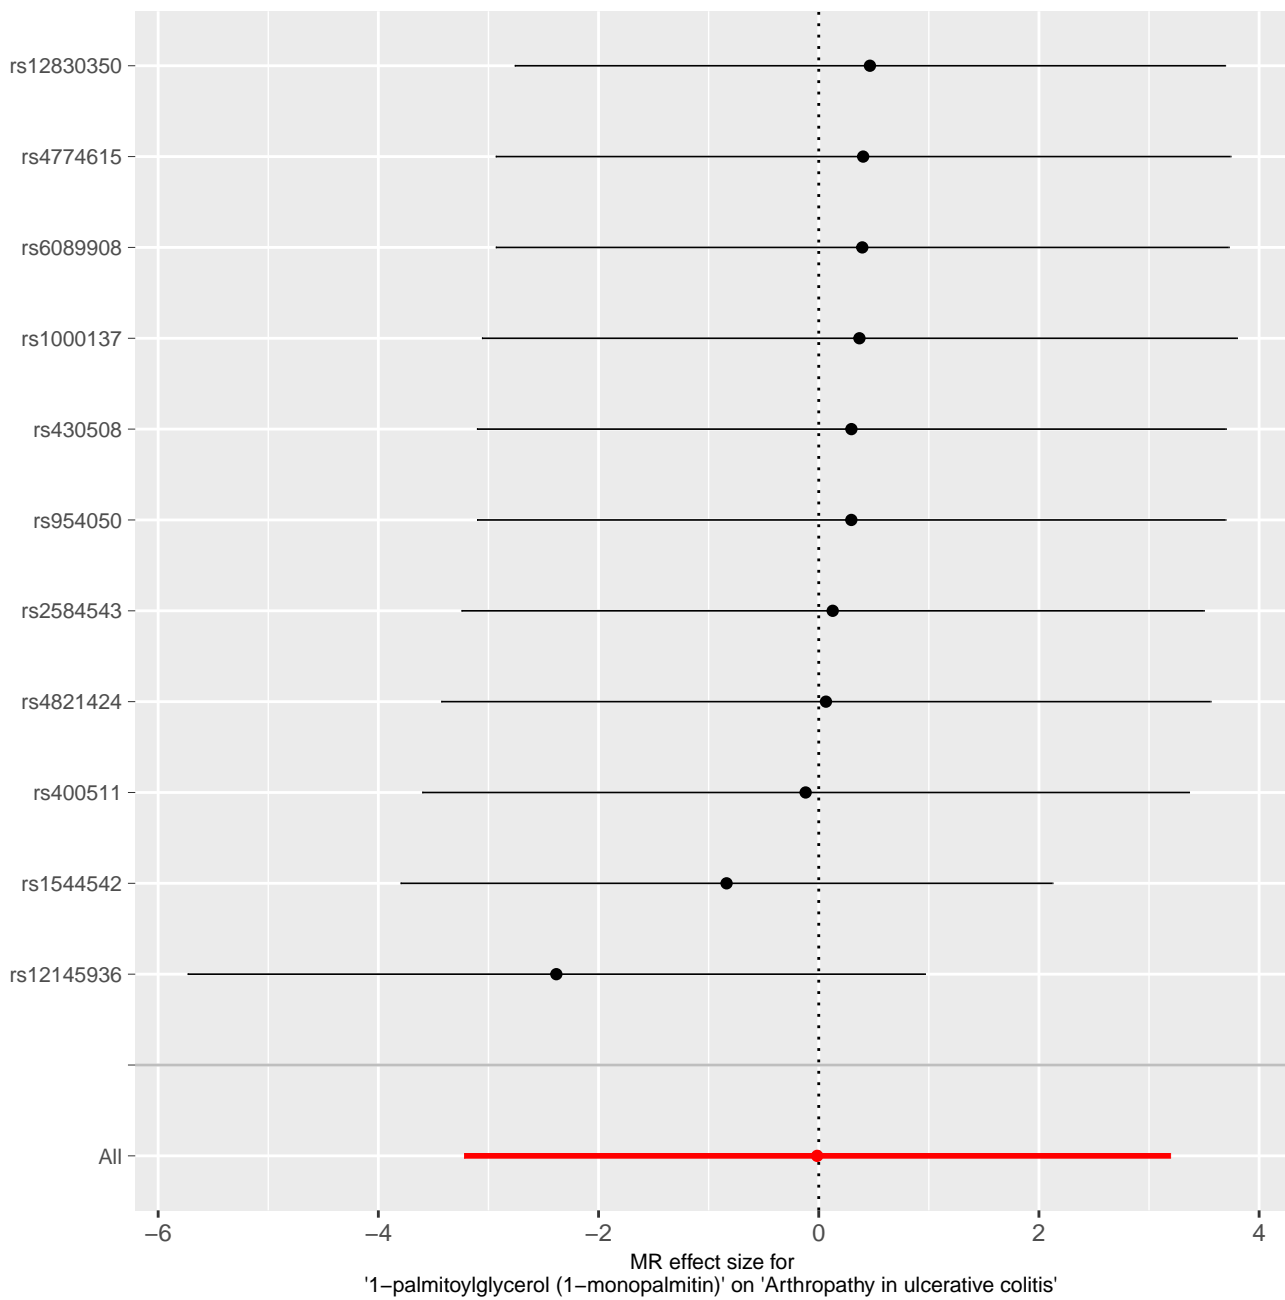

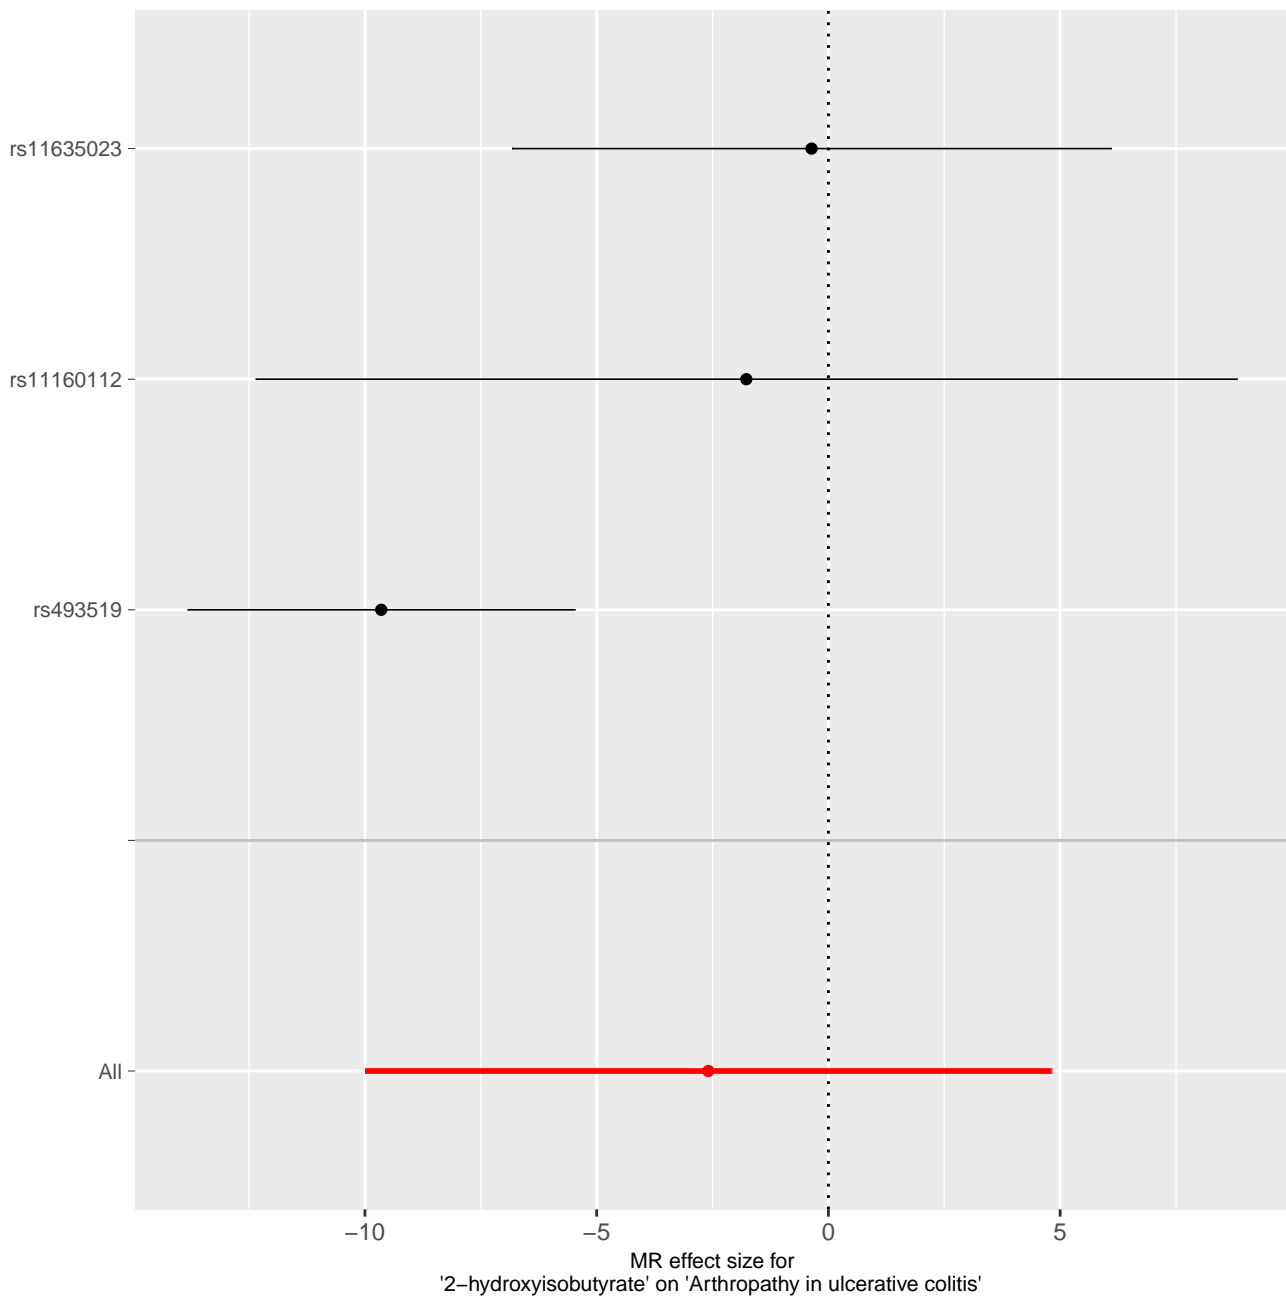

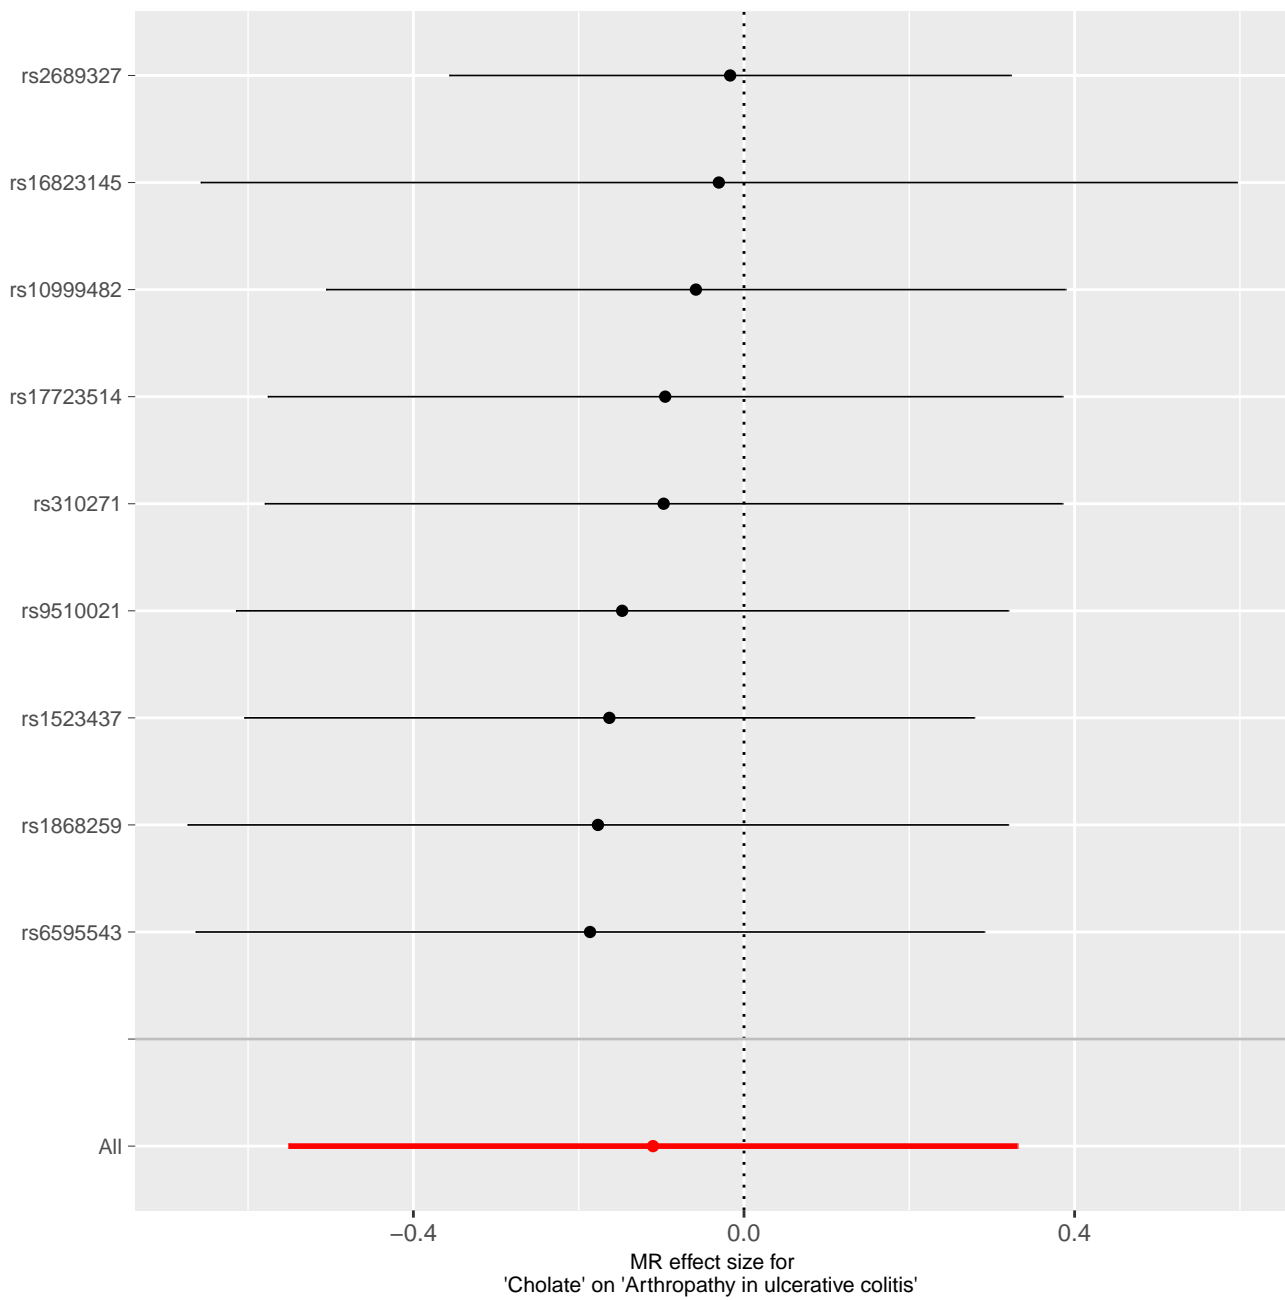

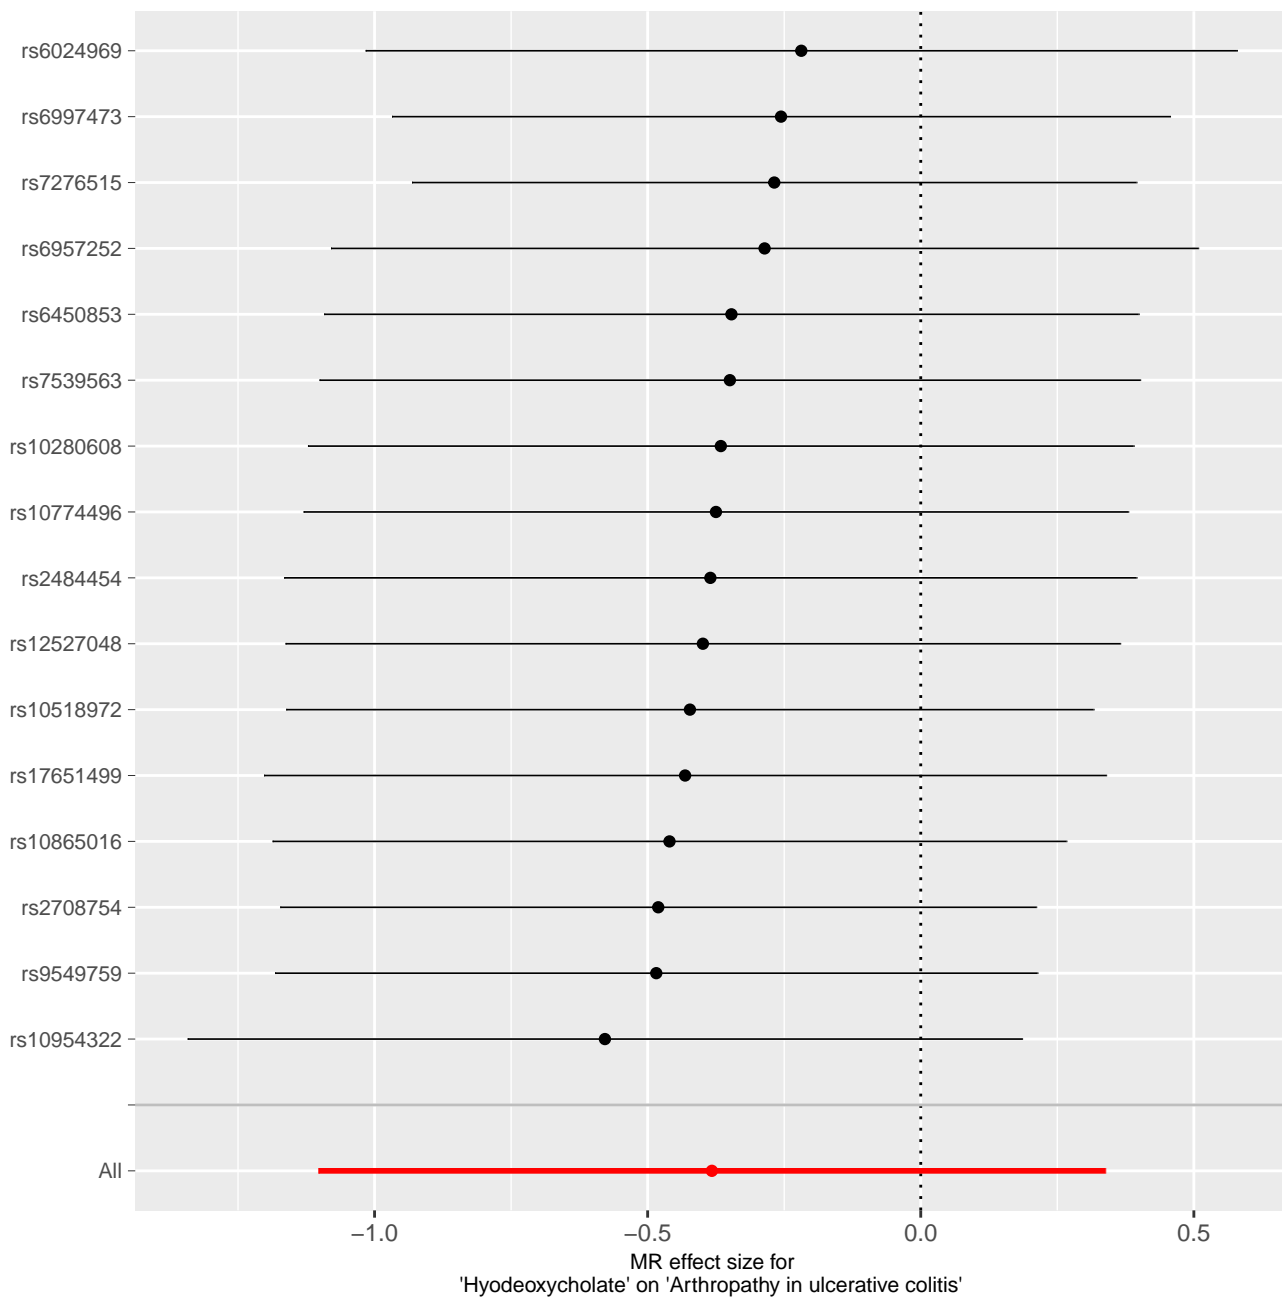

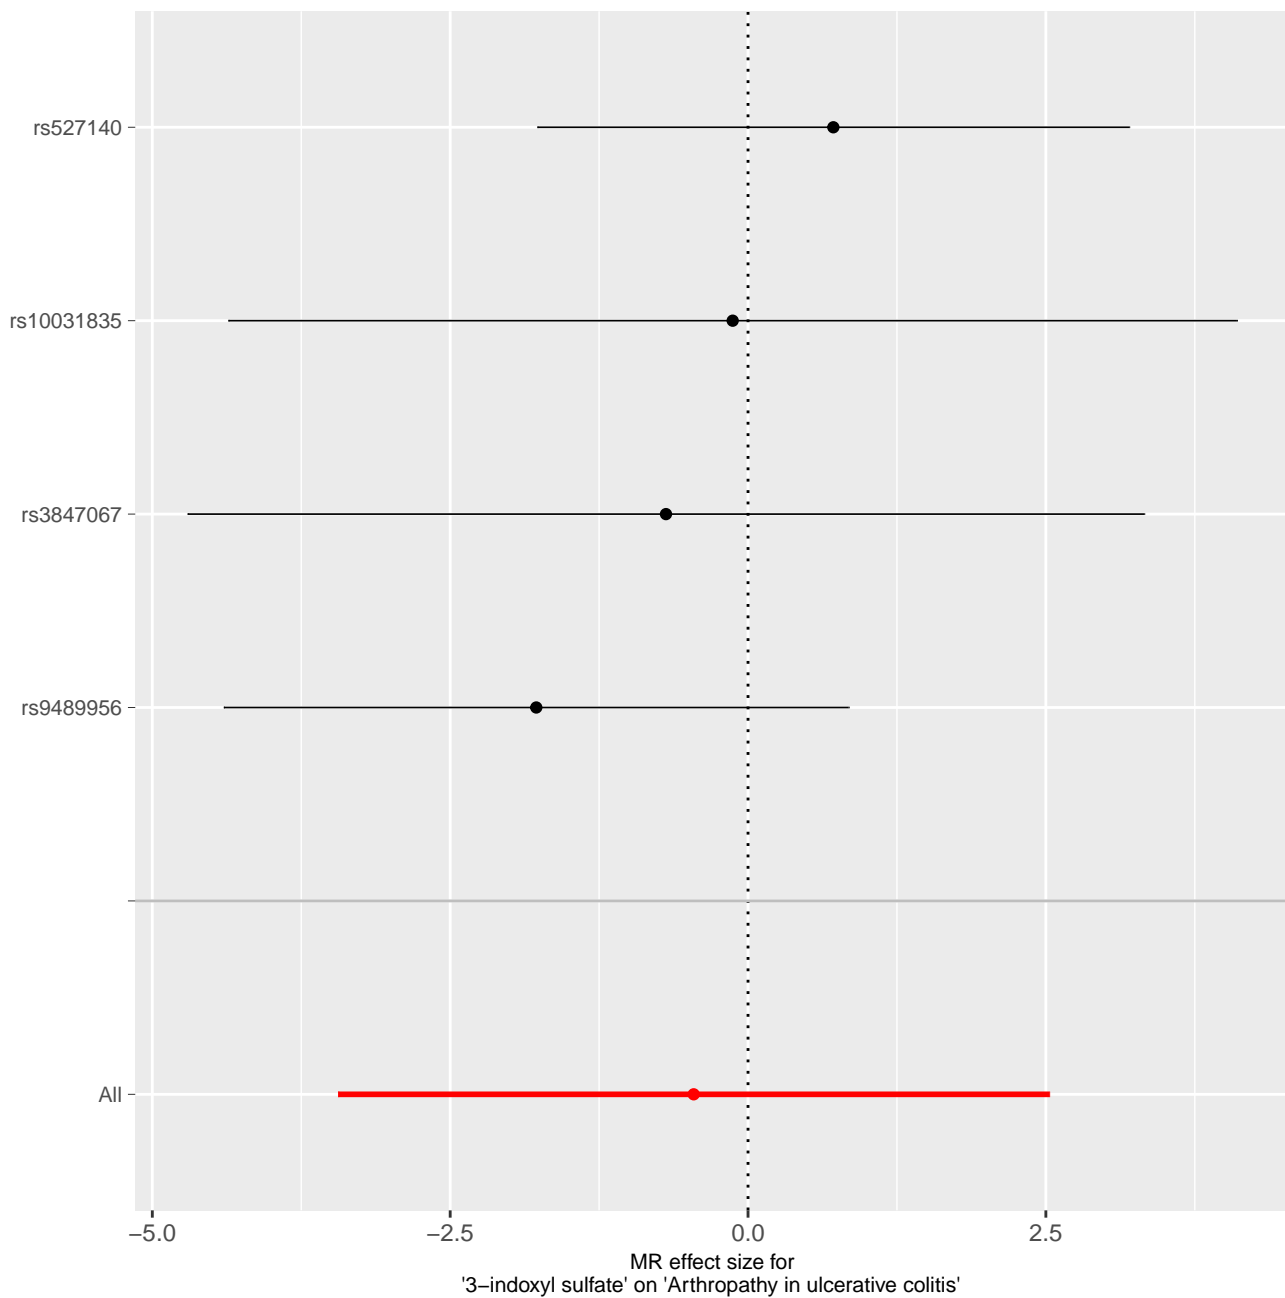

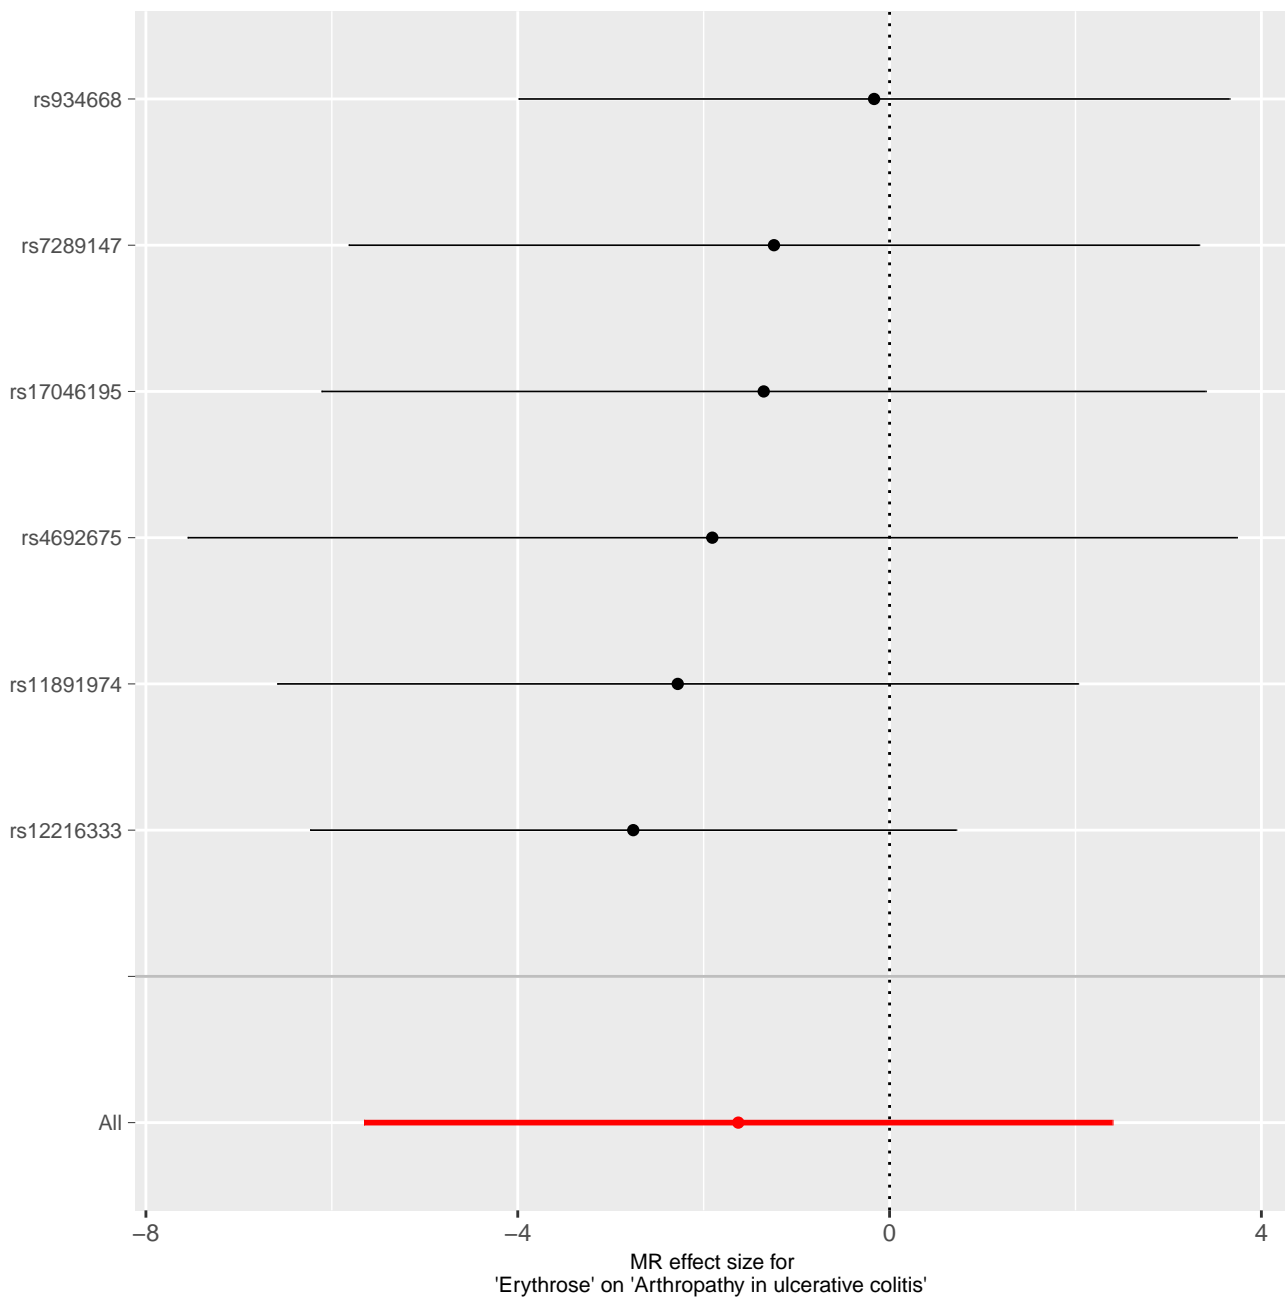

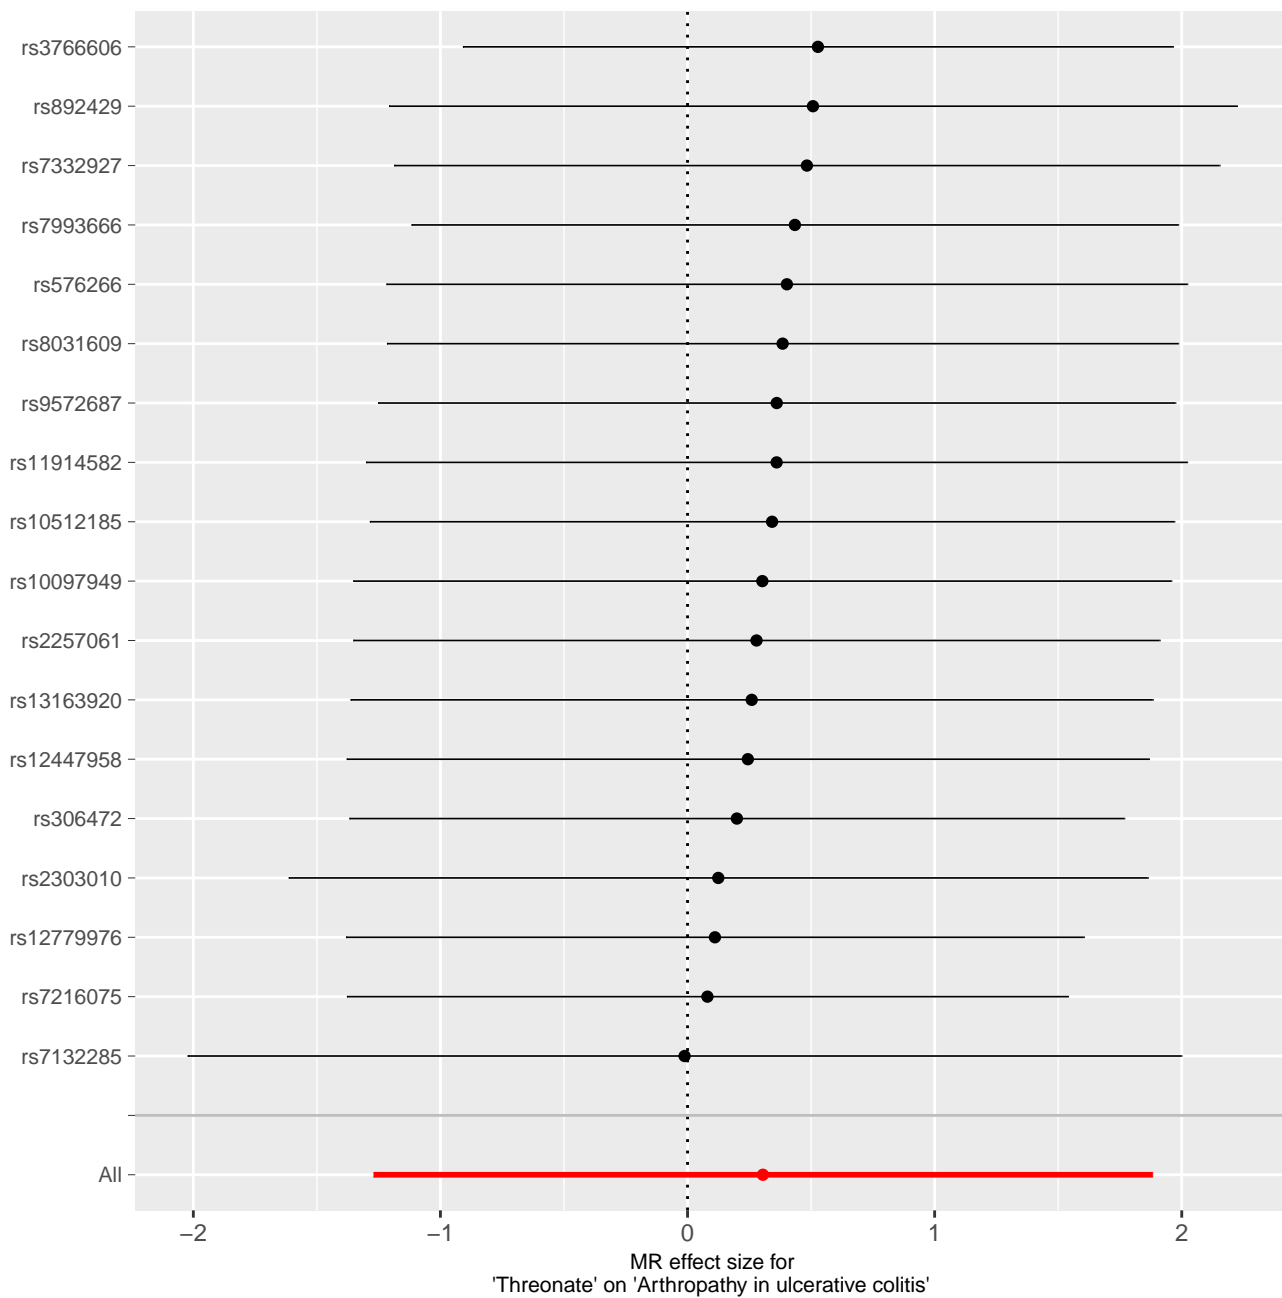



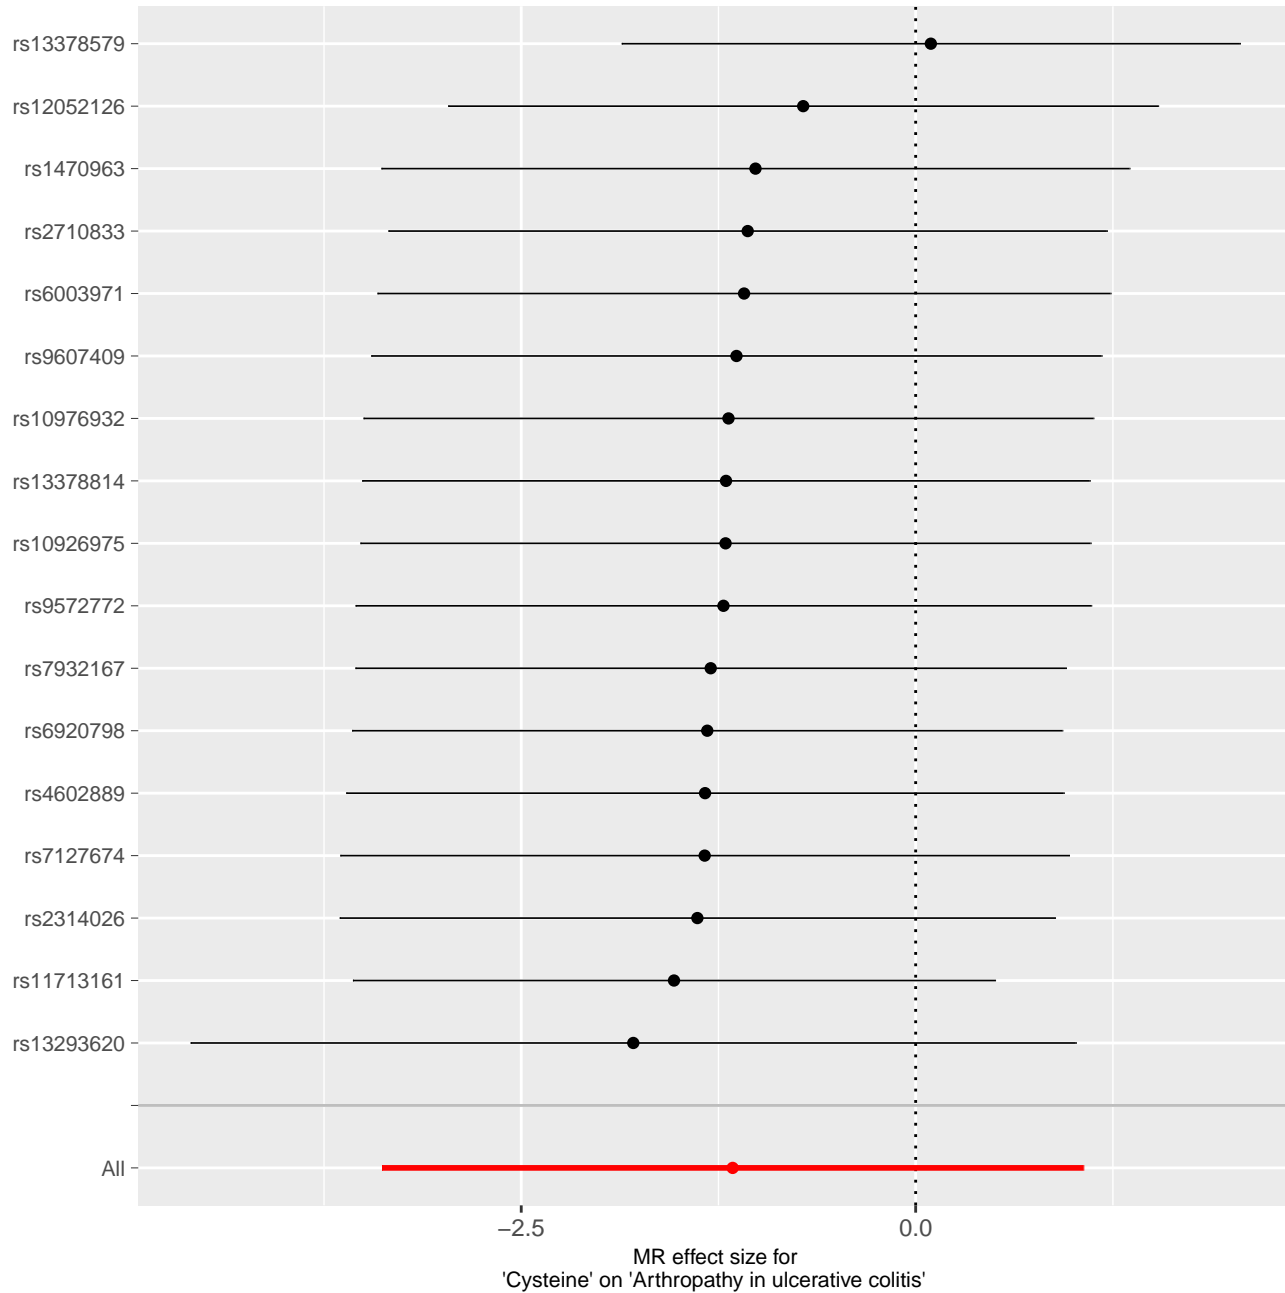

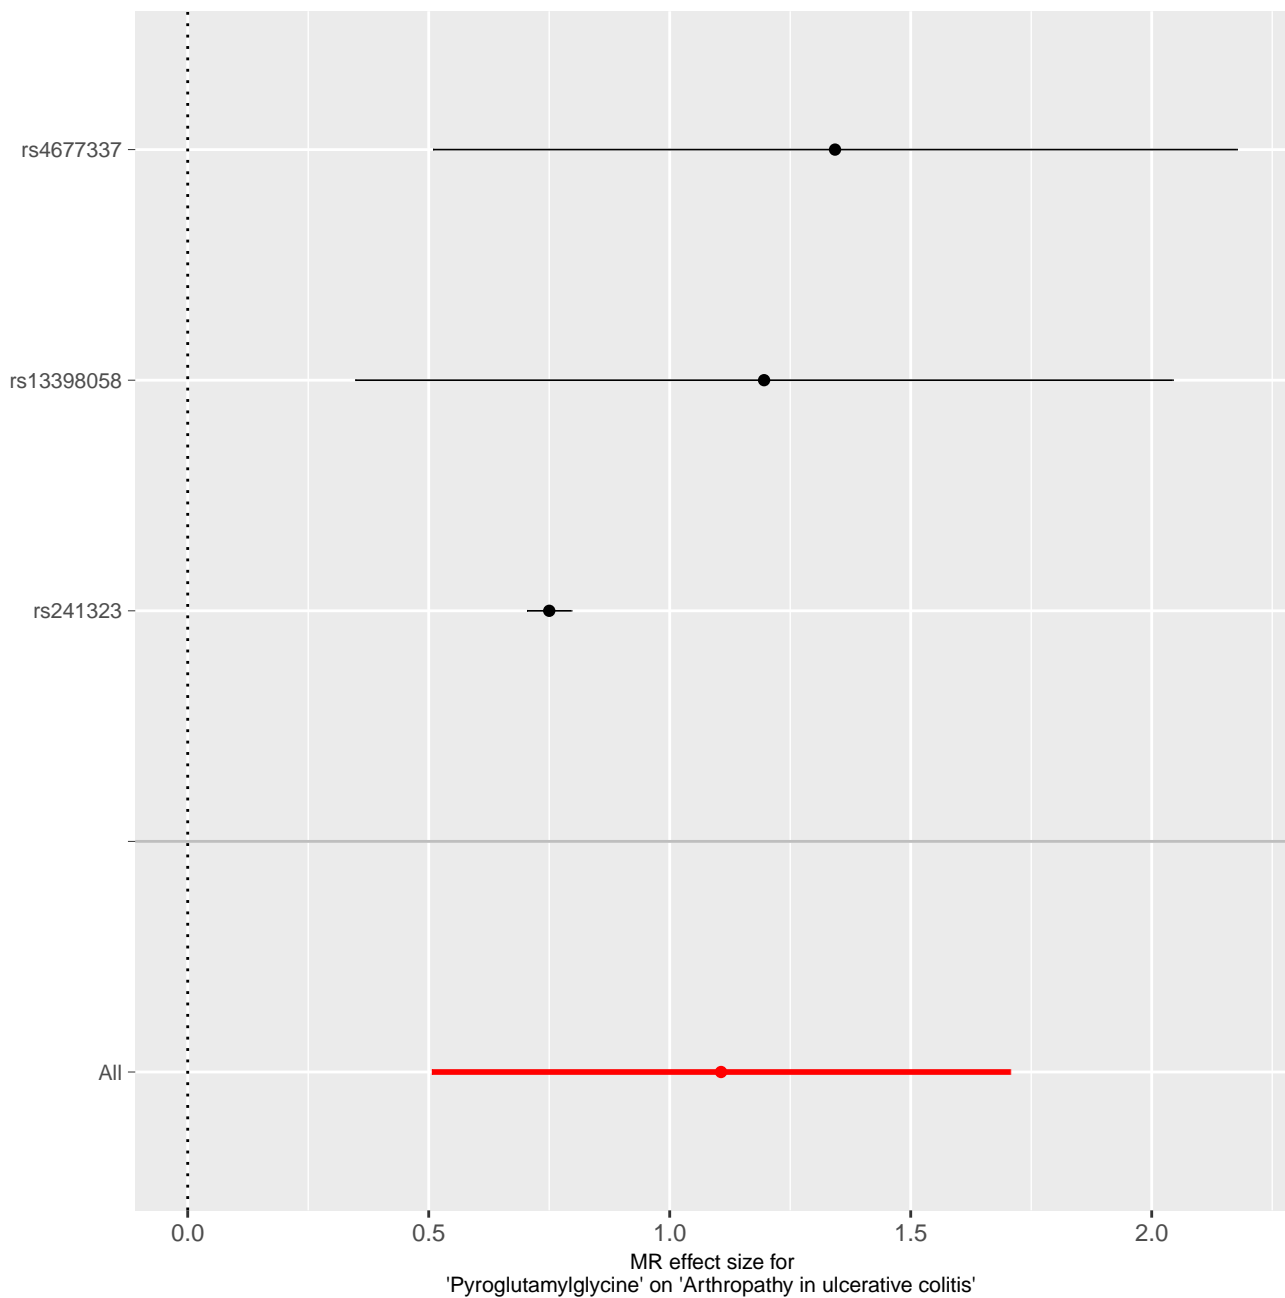

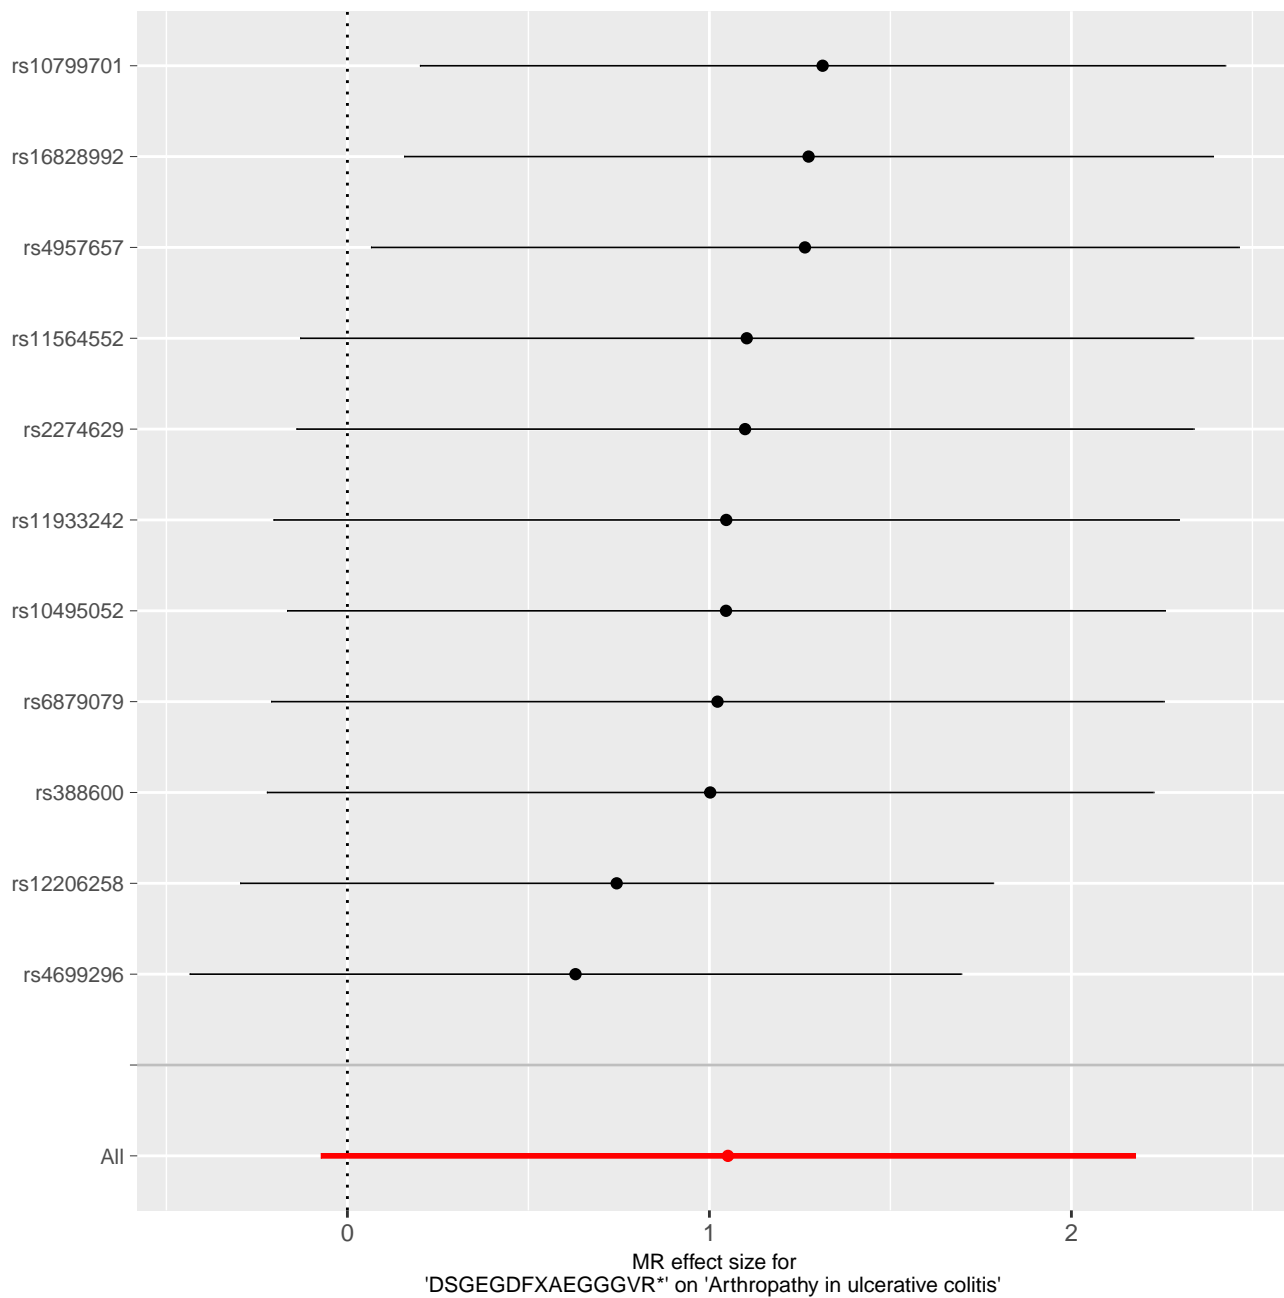

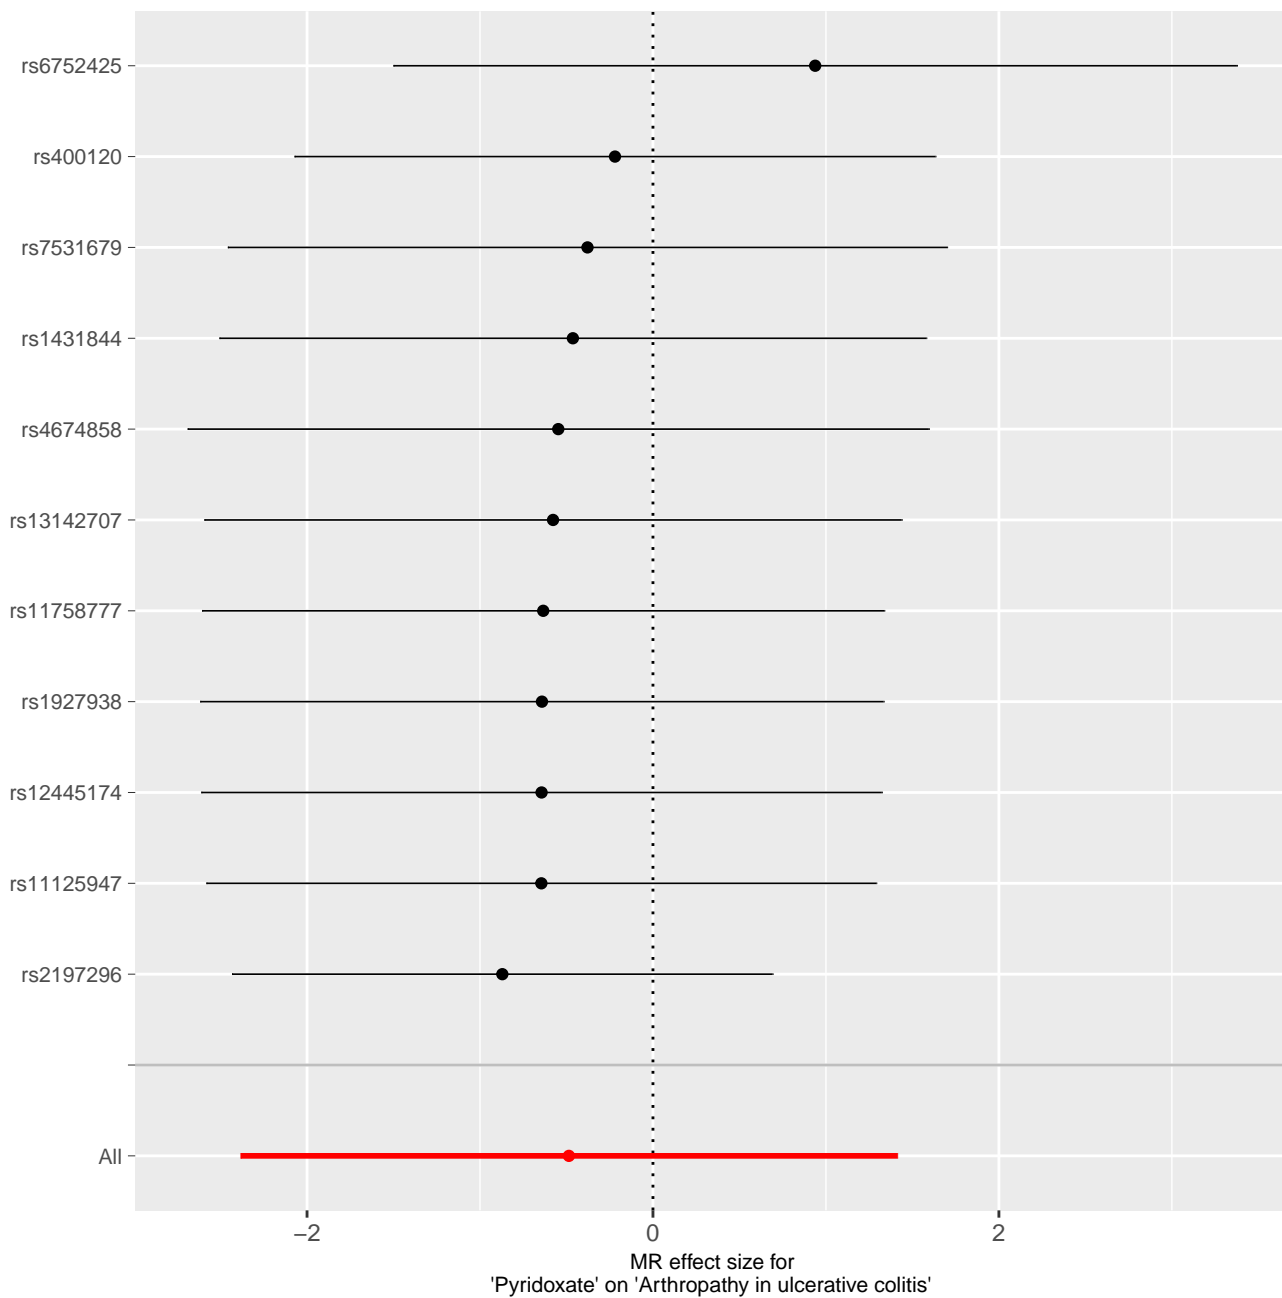

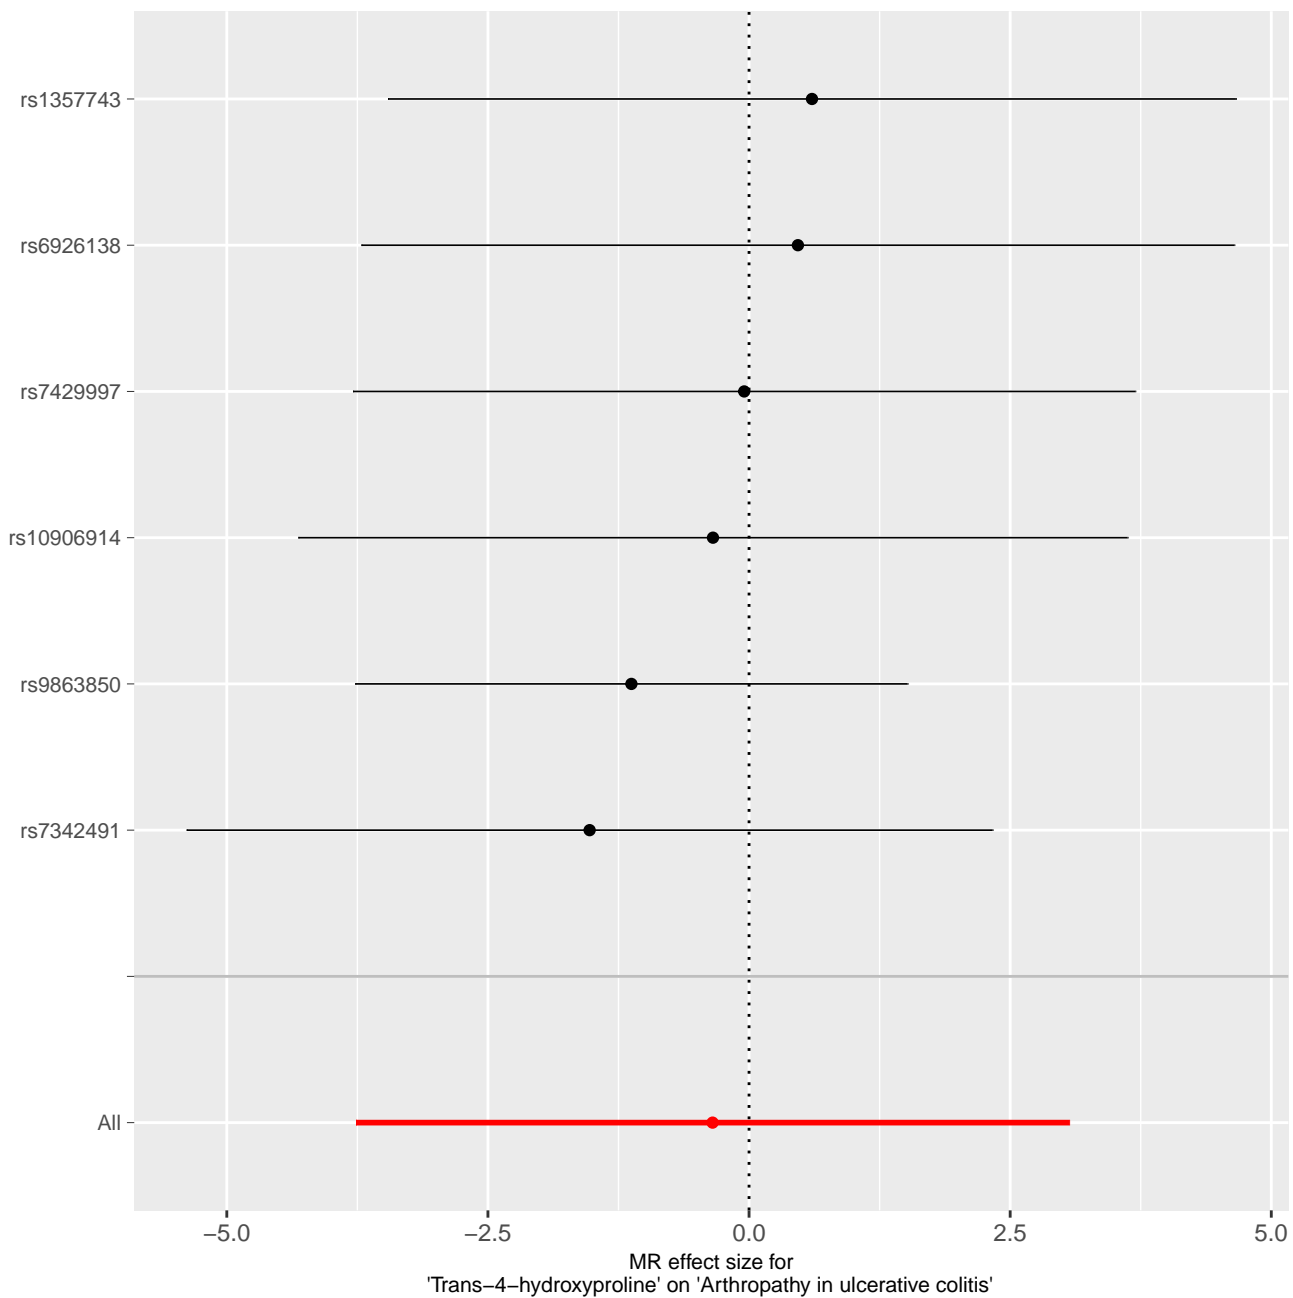

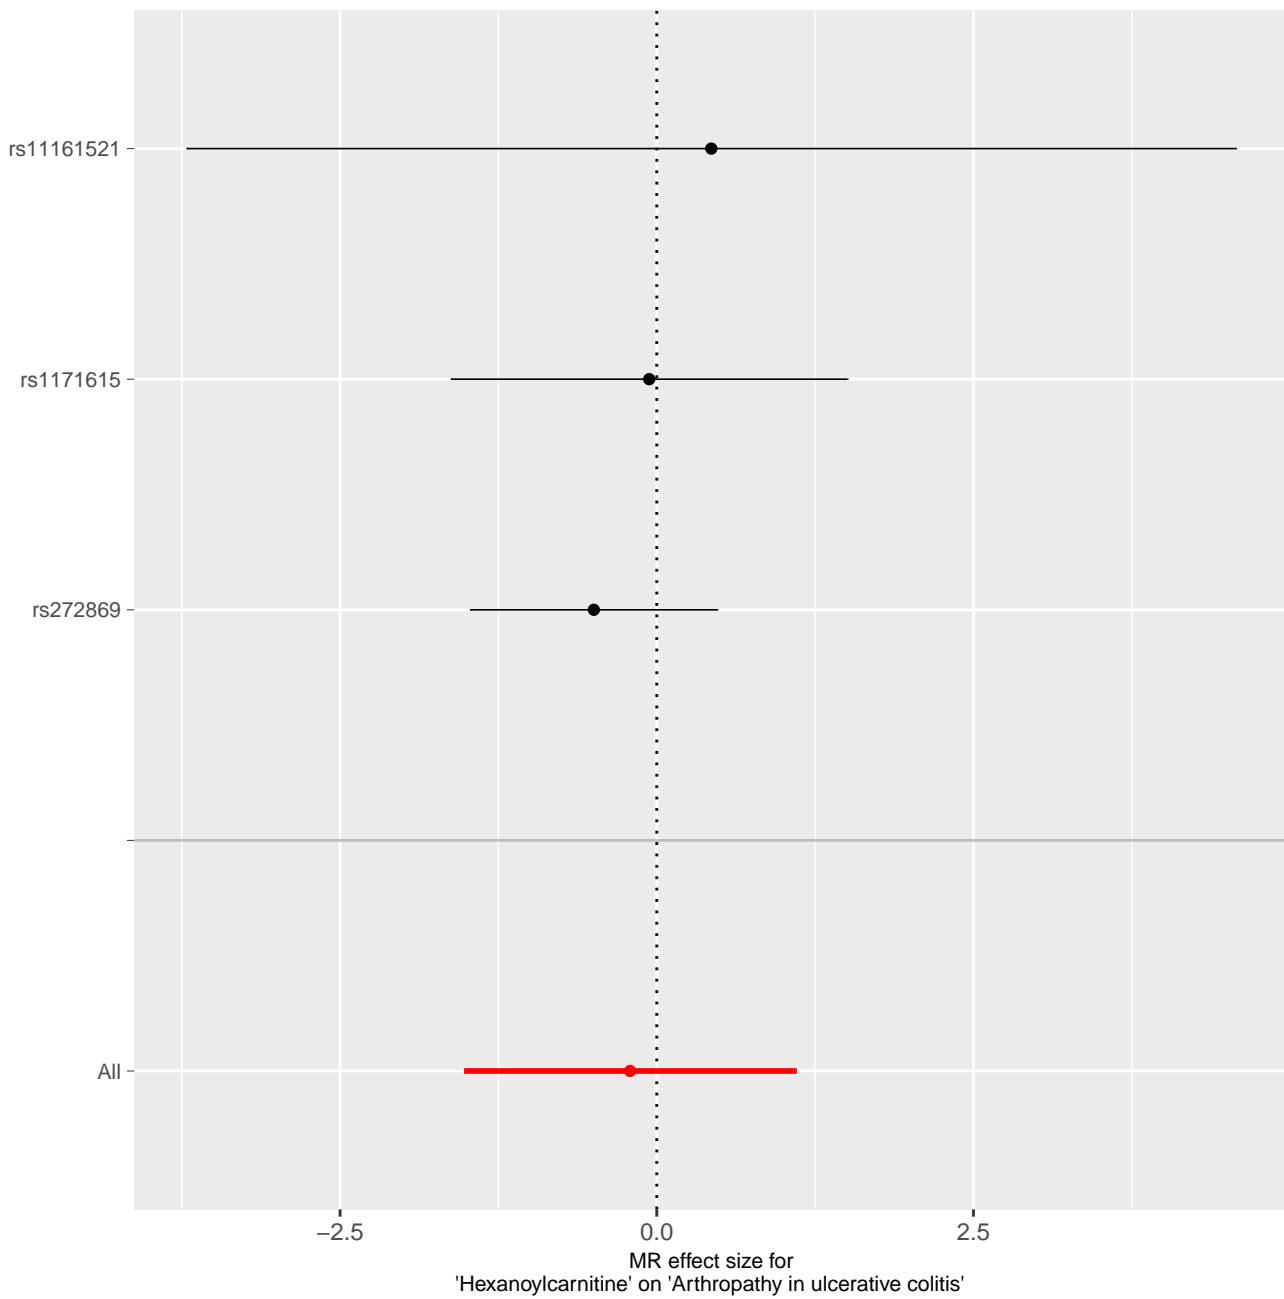

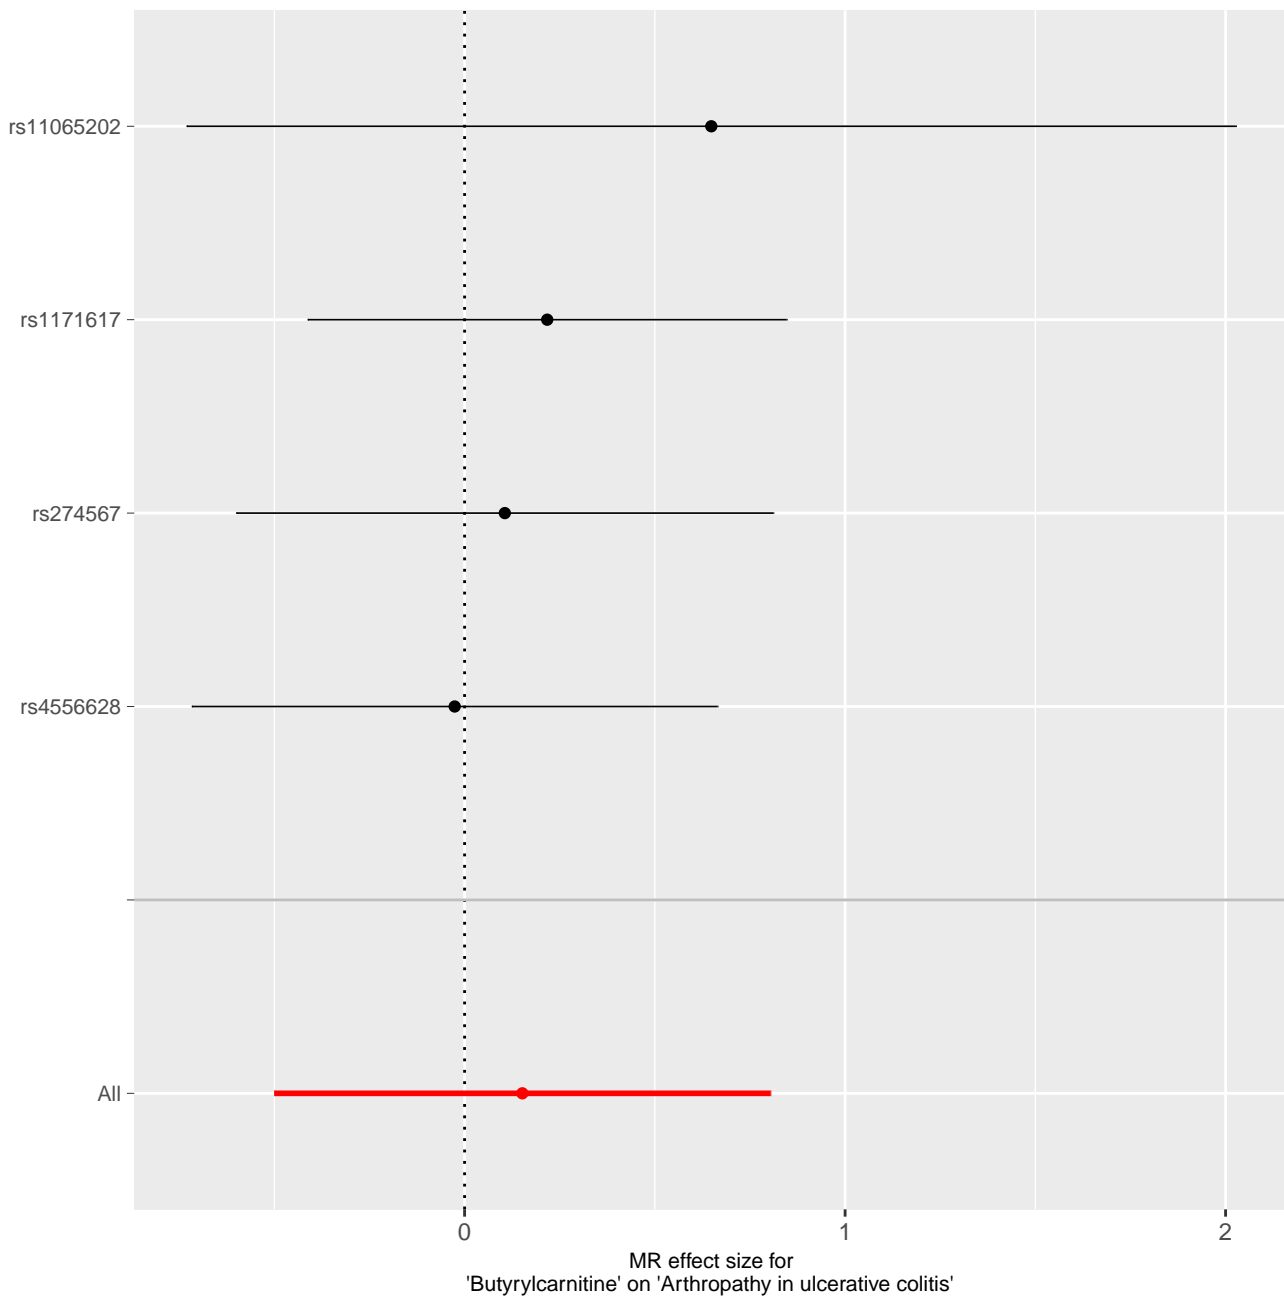

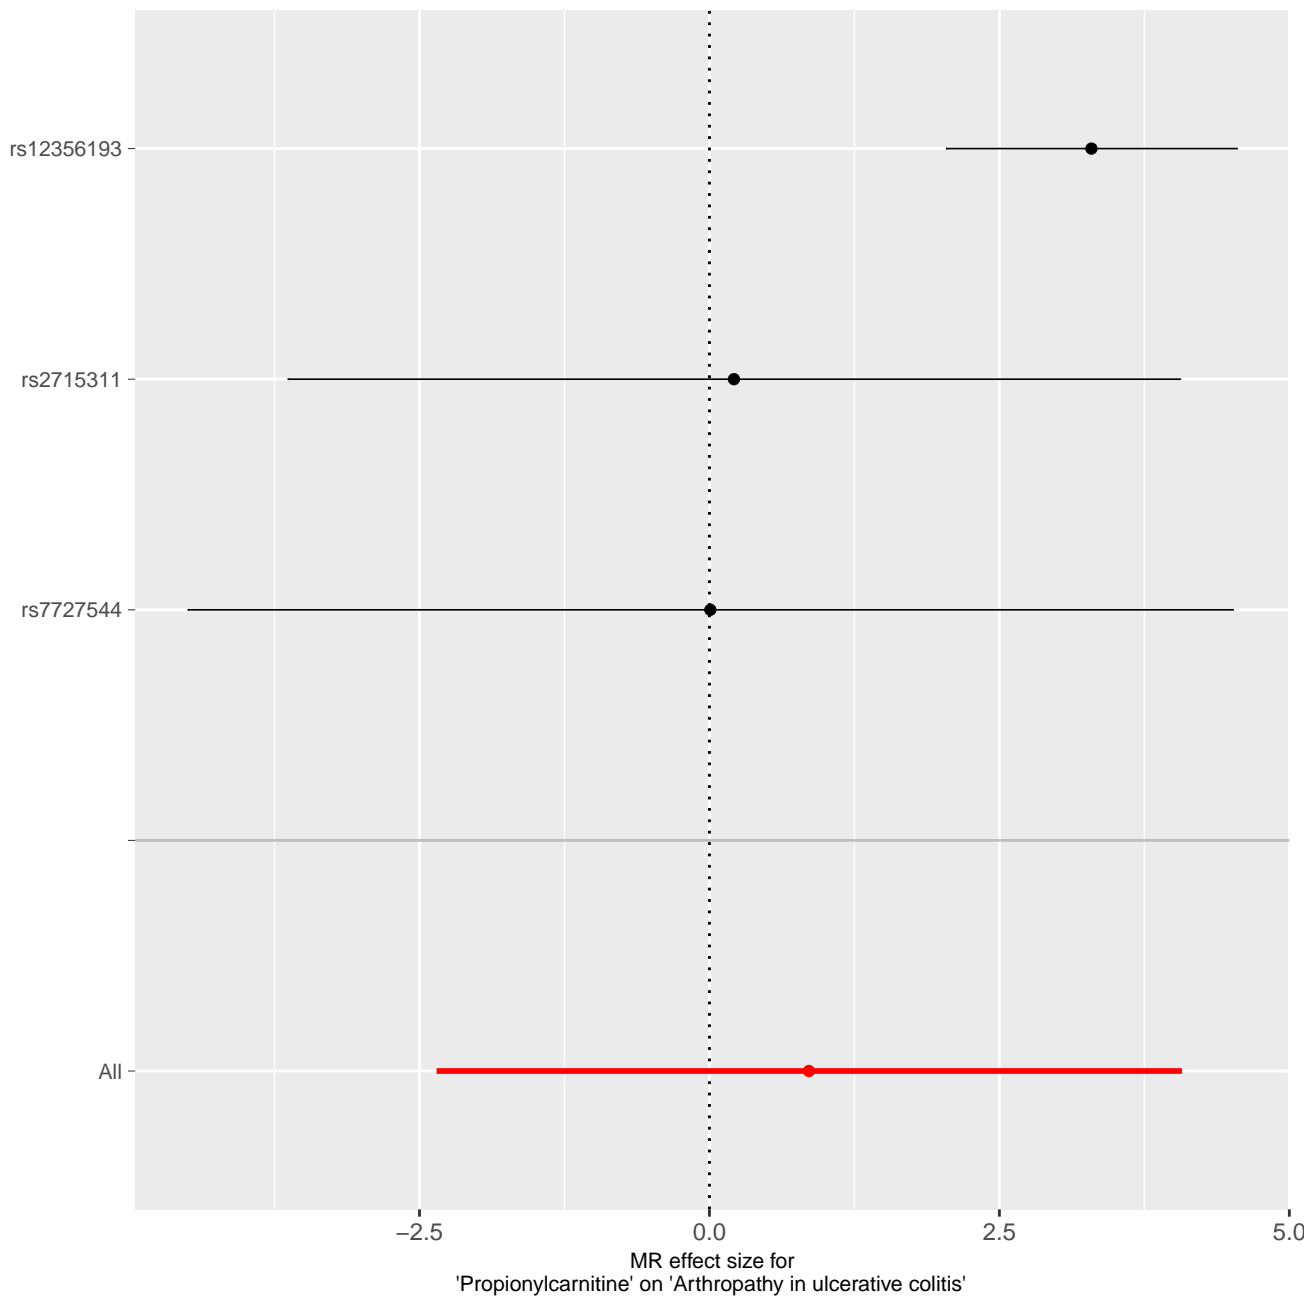



Batch 1798 : Caproate (6:0) on Arthropathy in ulcerative colitis

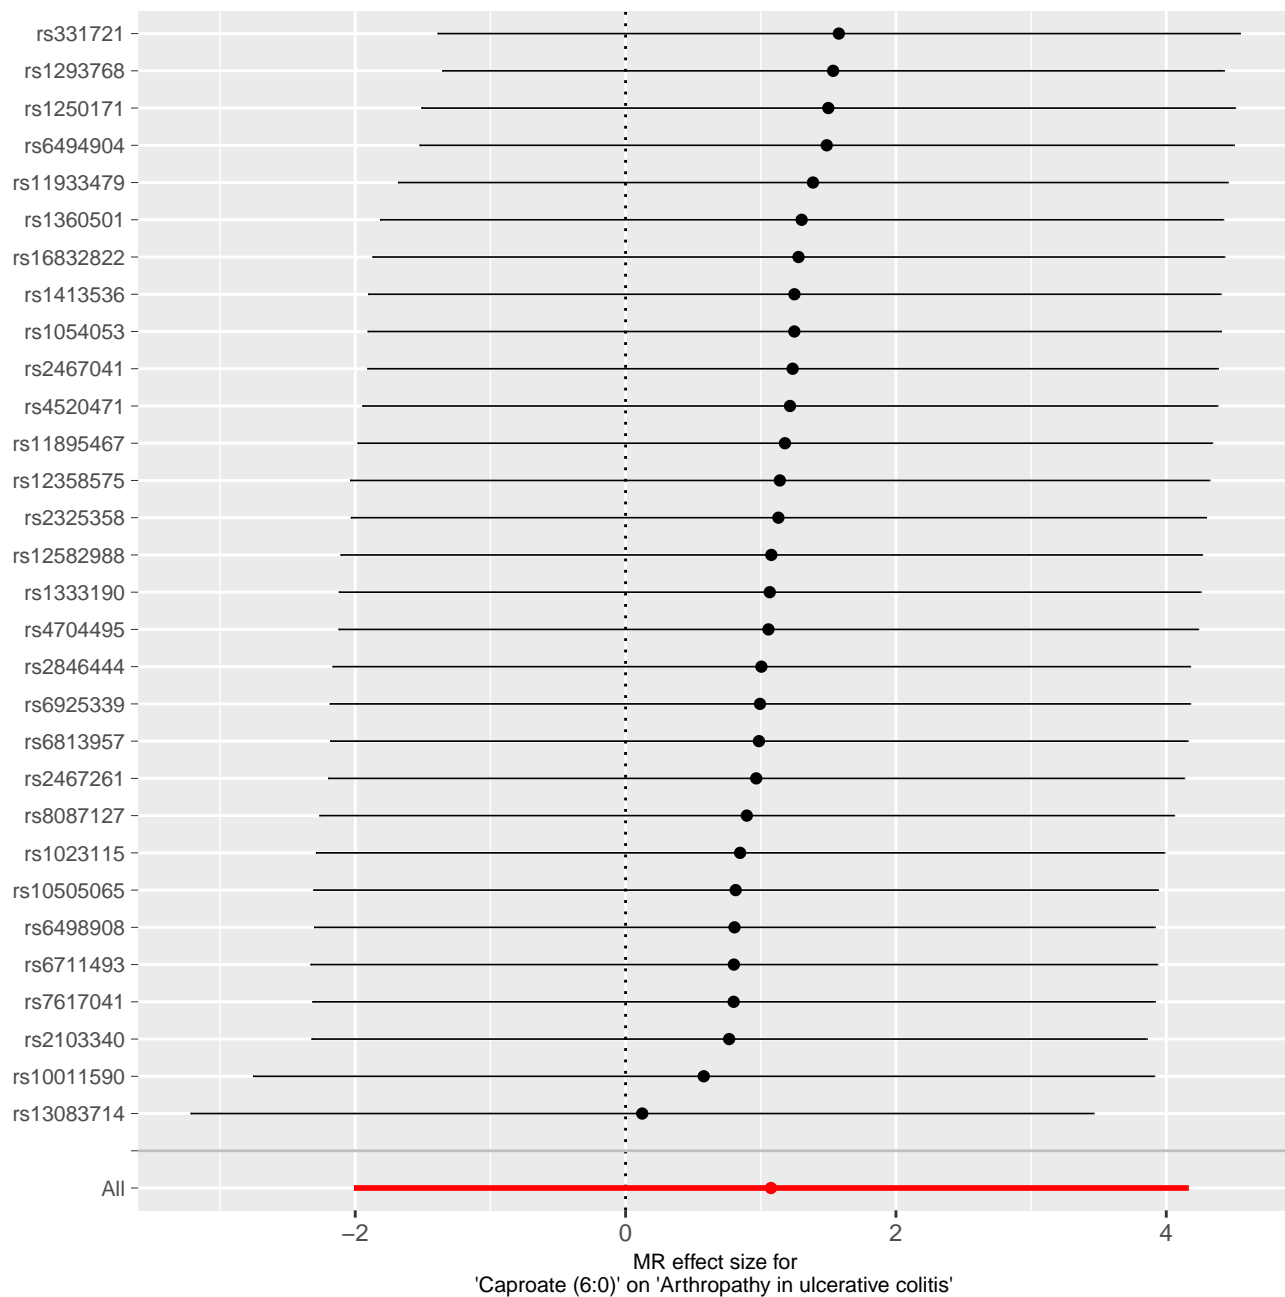

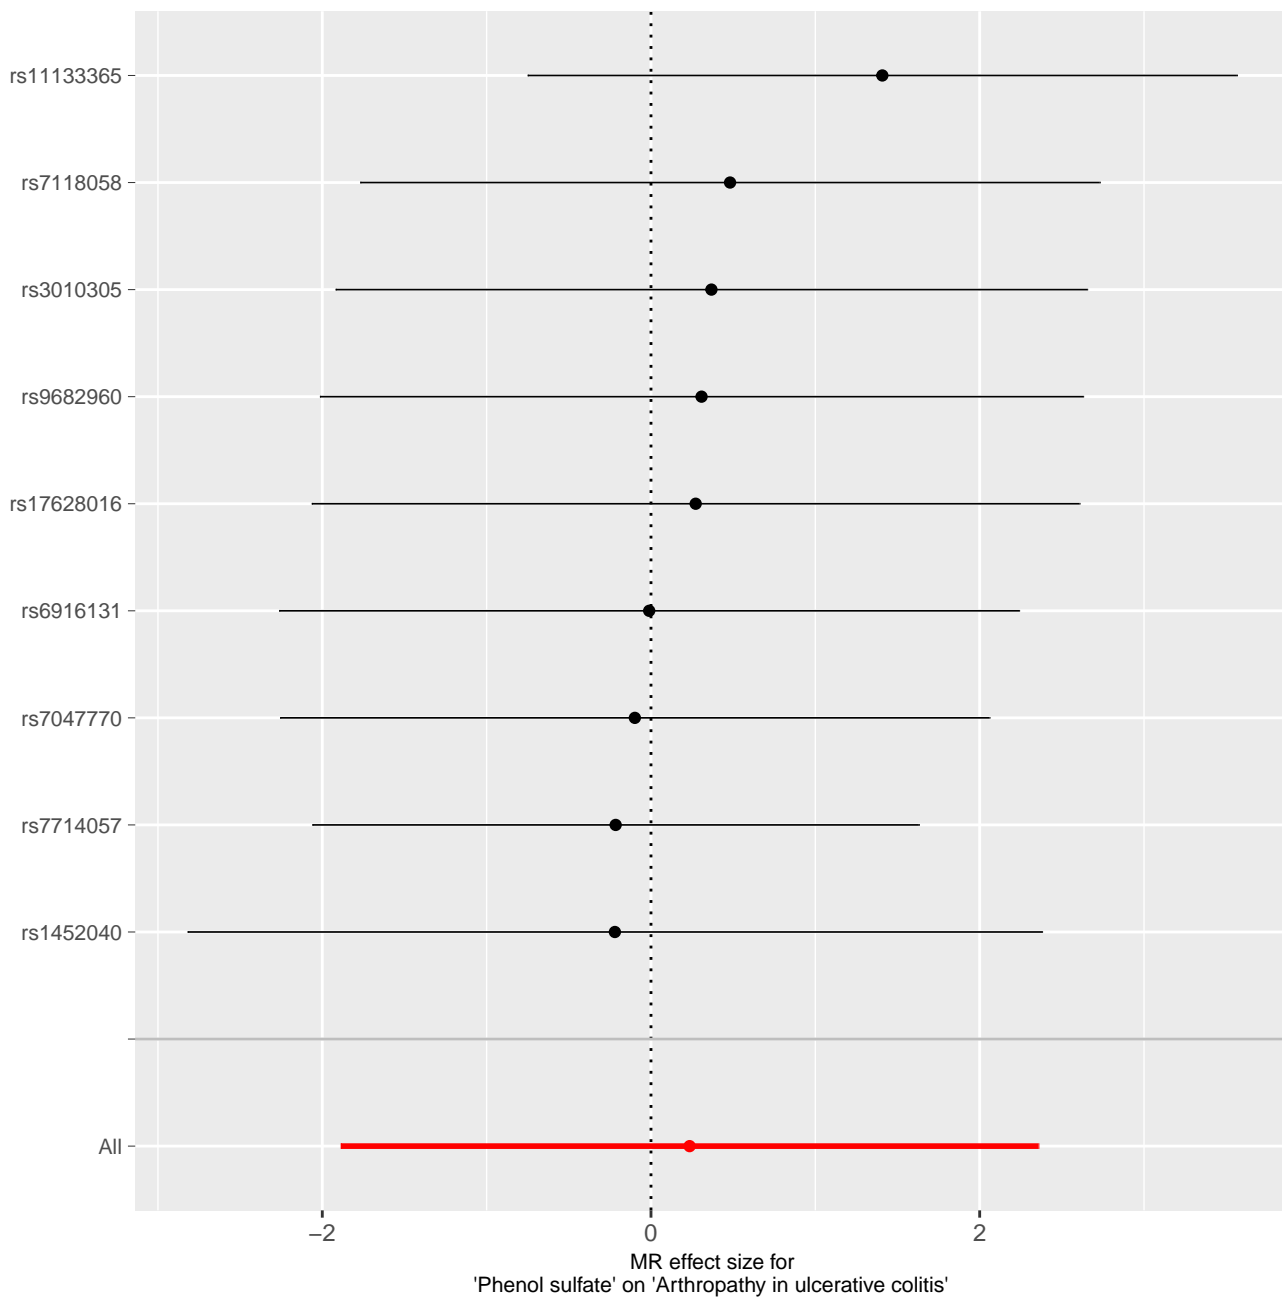

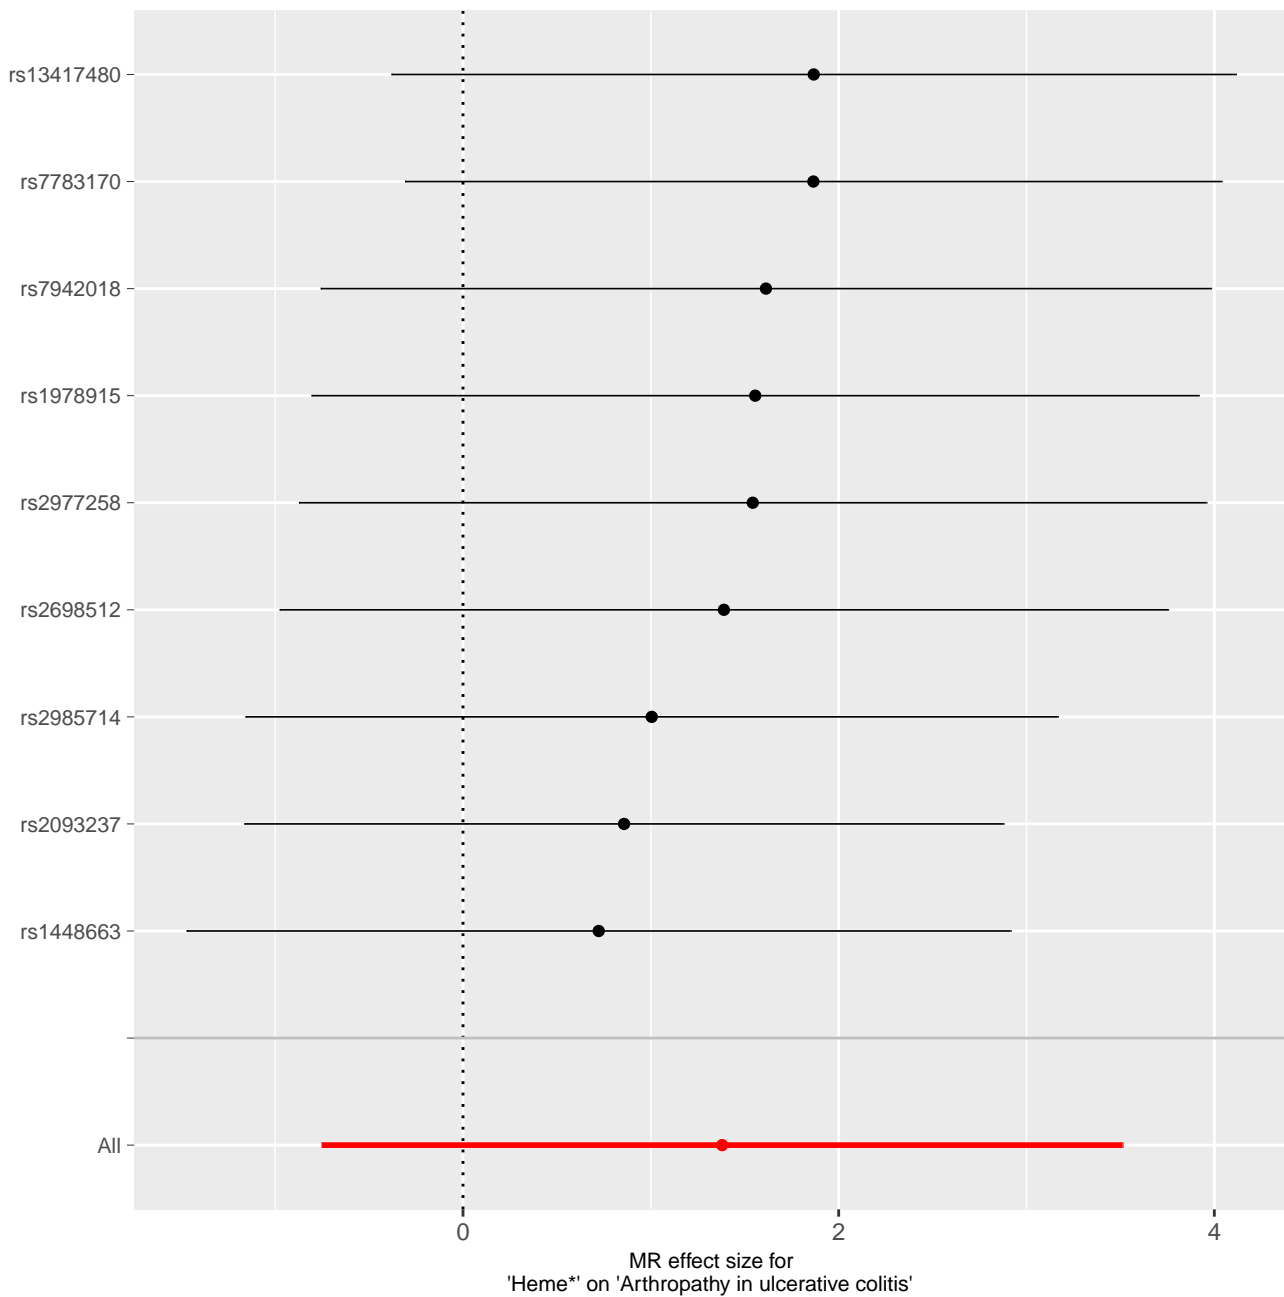

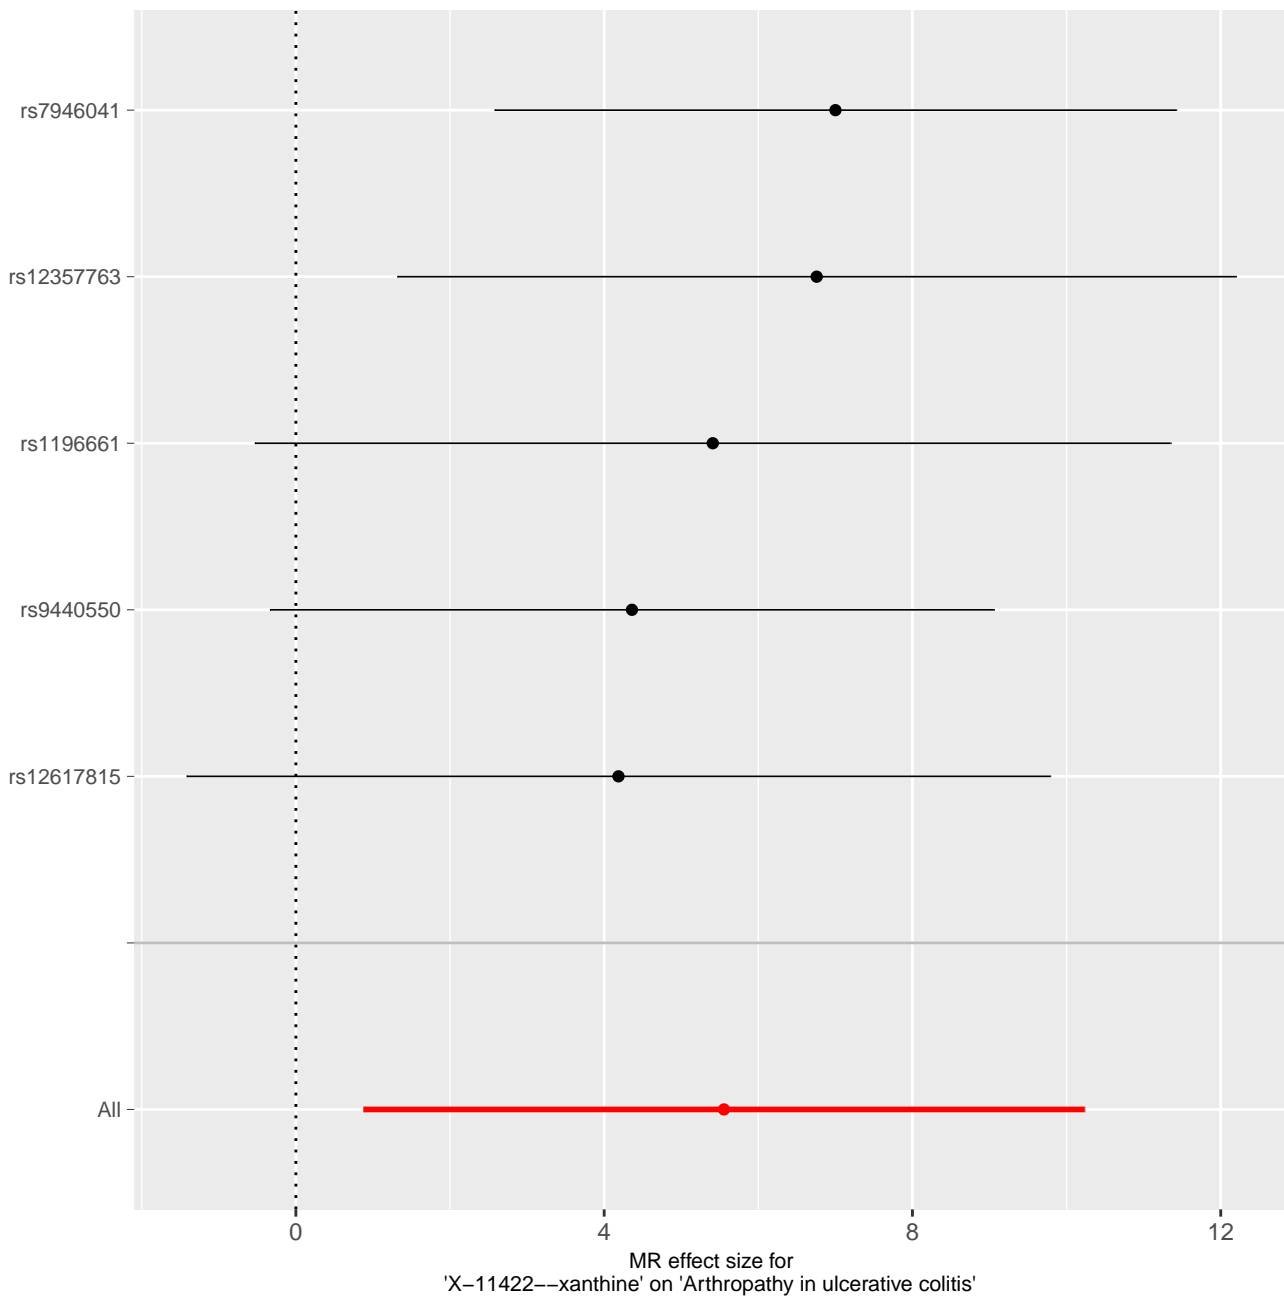

Batch 1814 : X-11593--O-methylascorbate\* on Arthropathy in ulcerative colitis

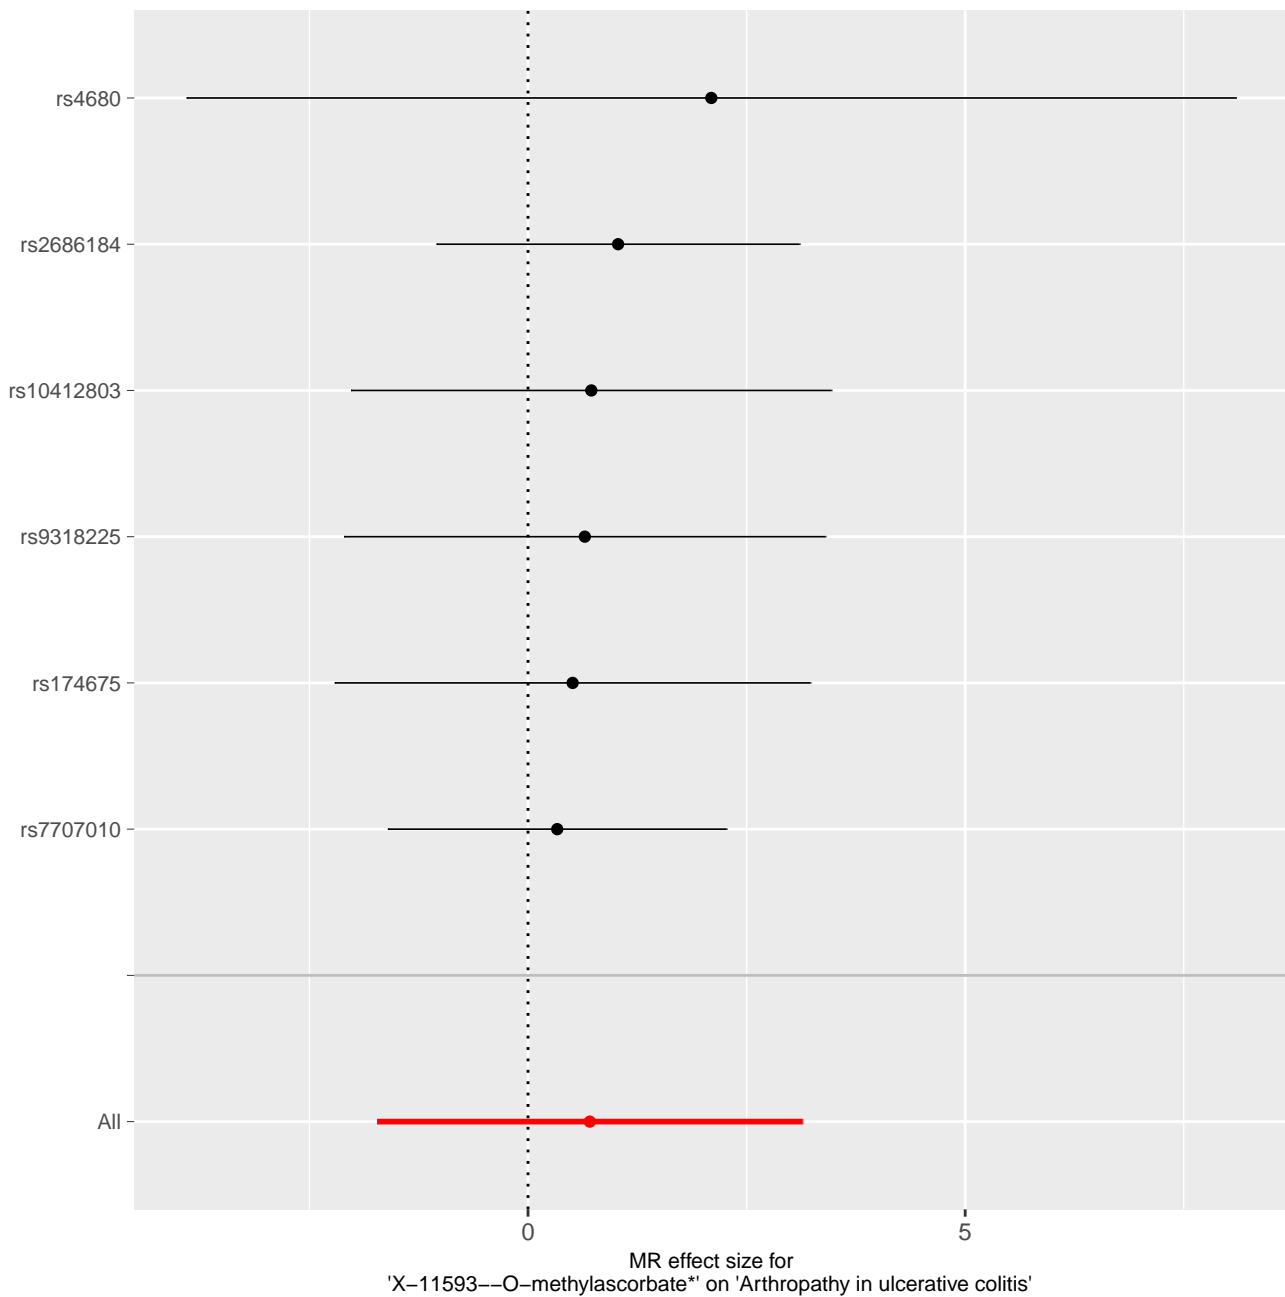

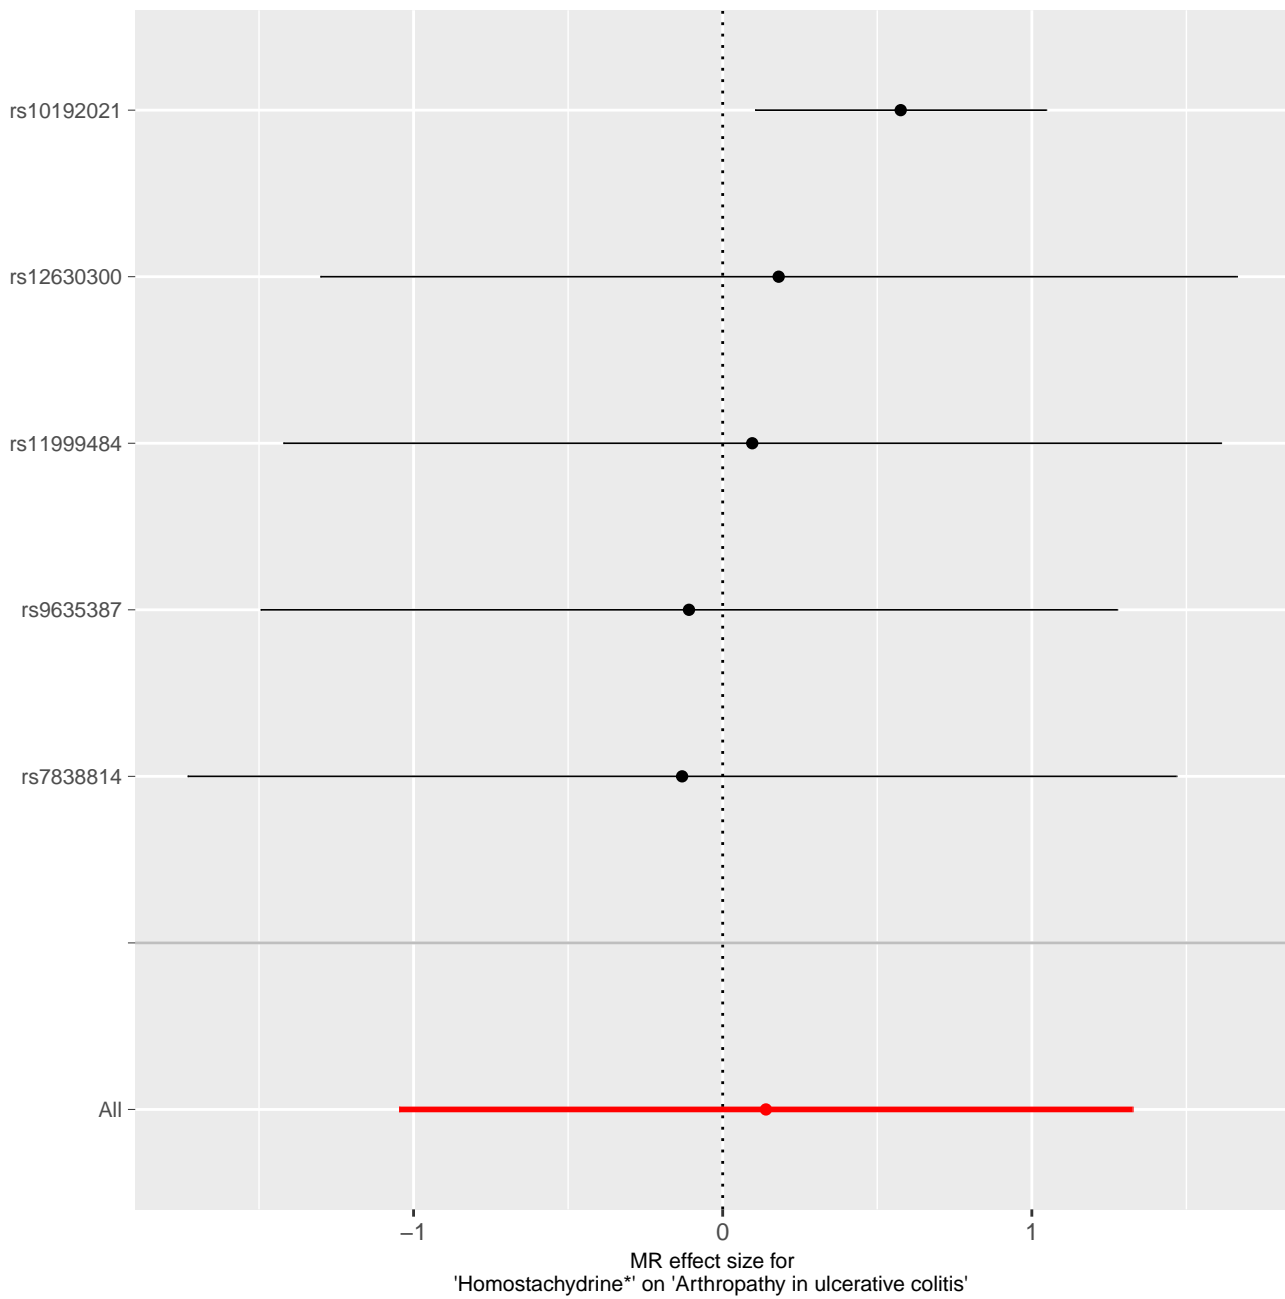

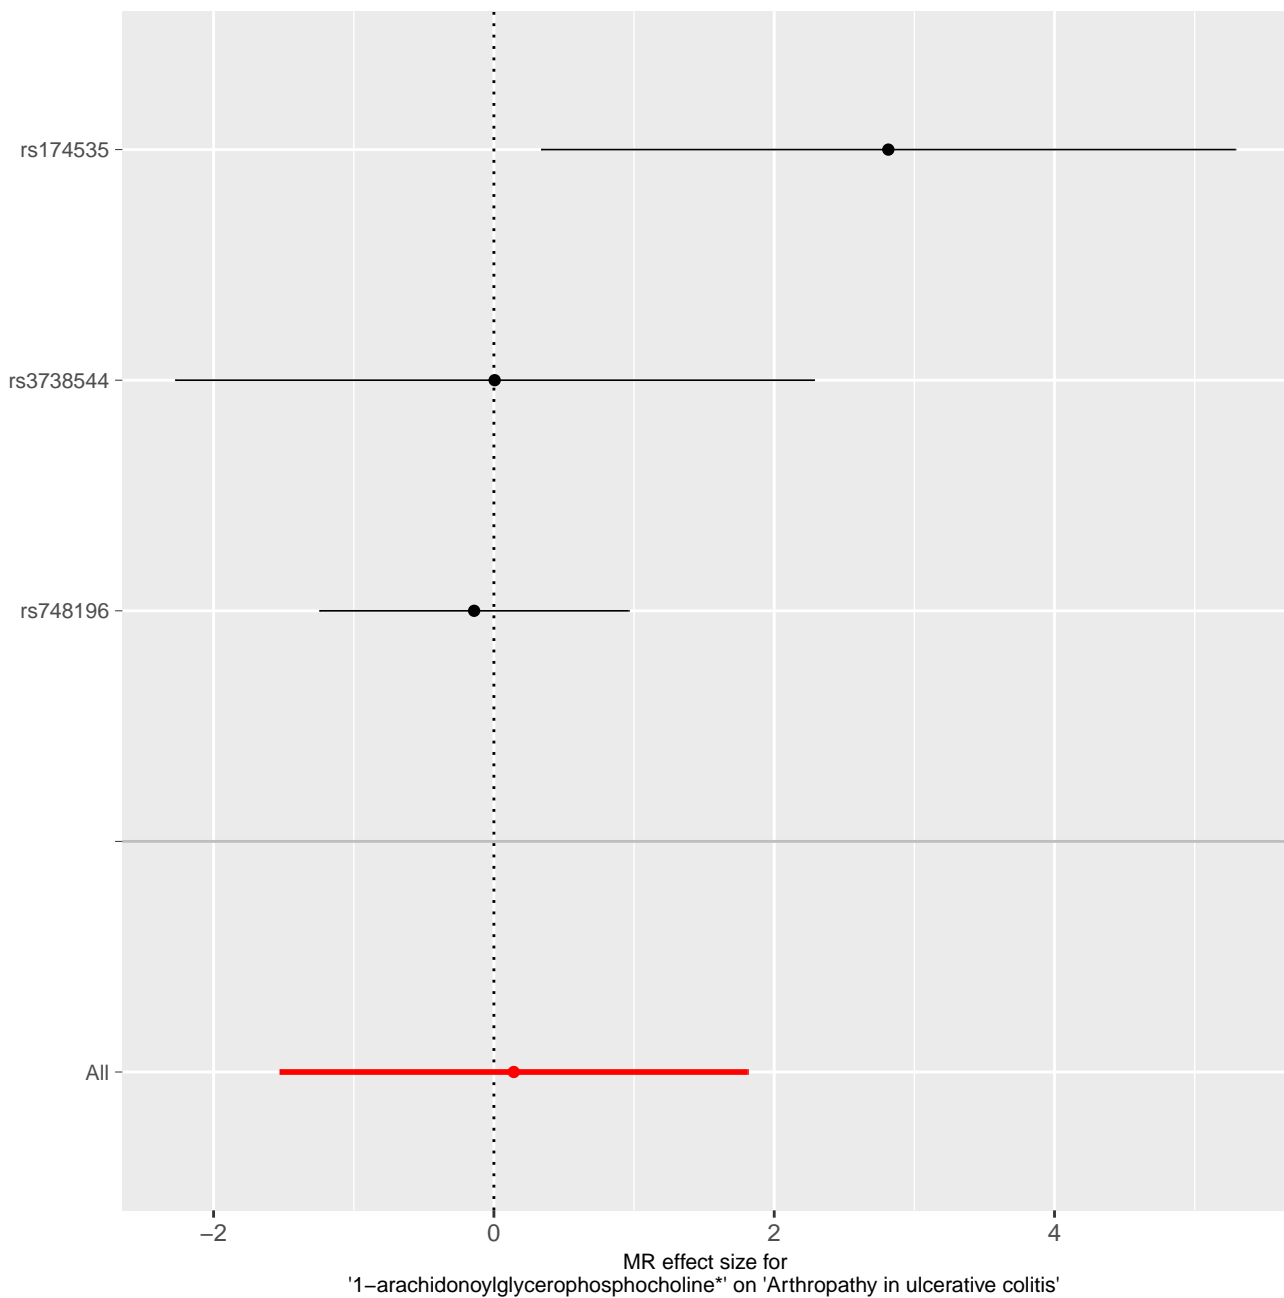

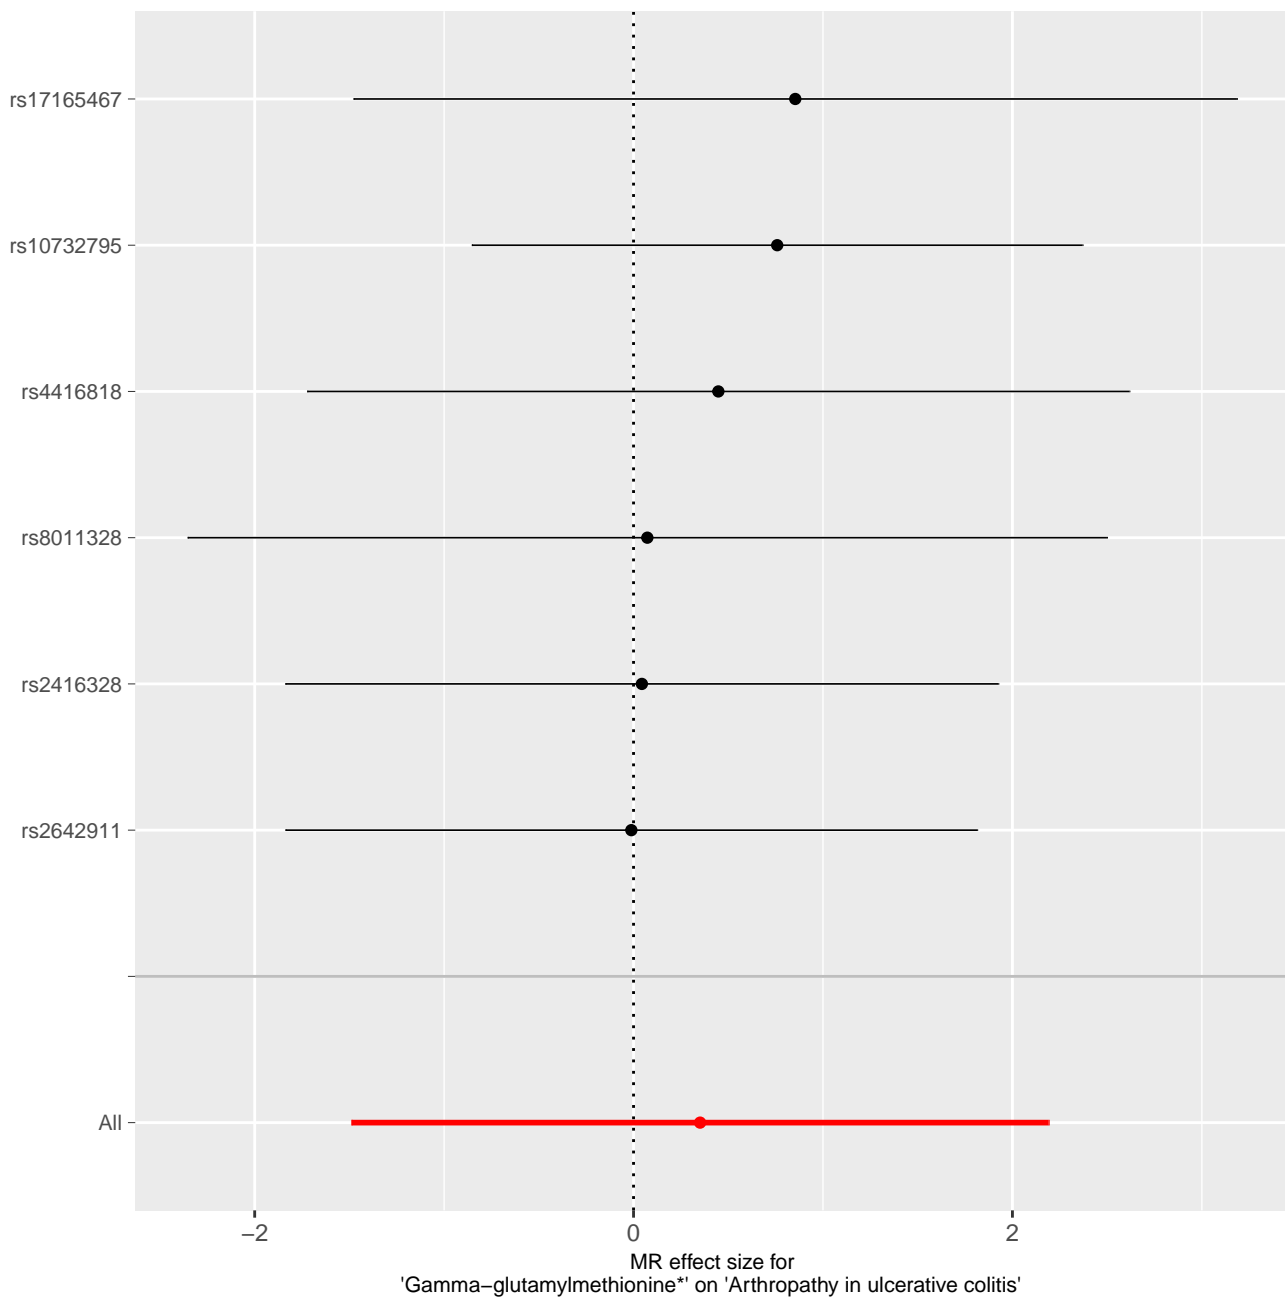



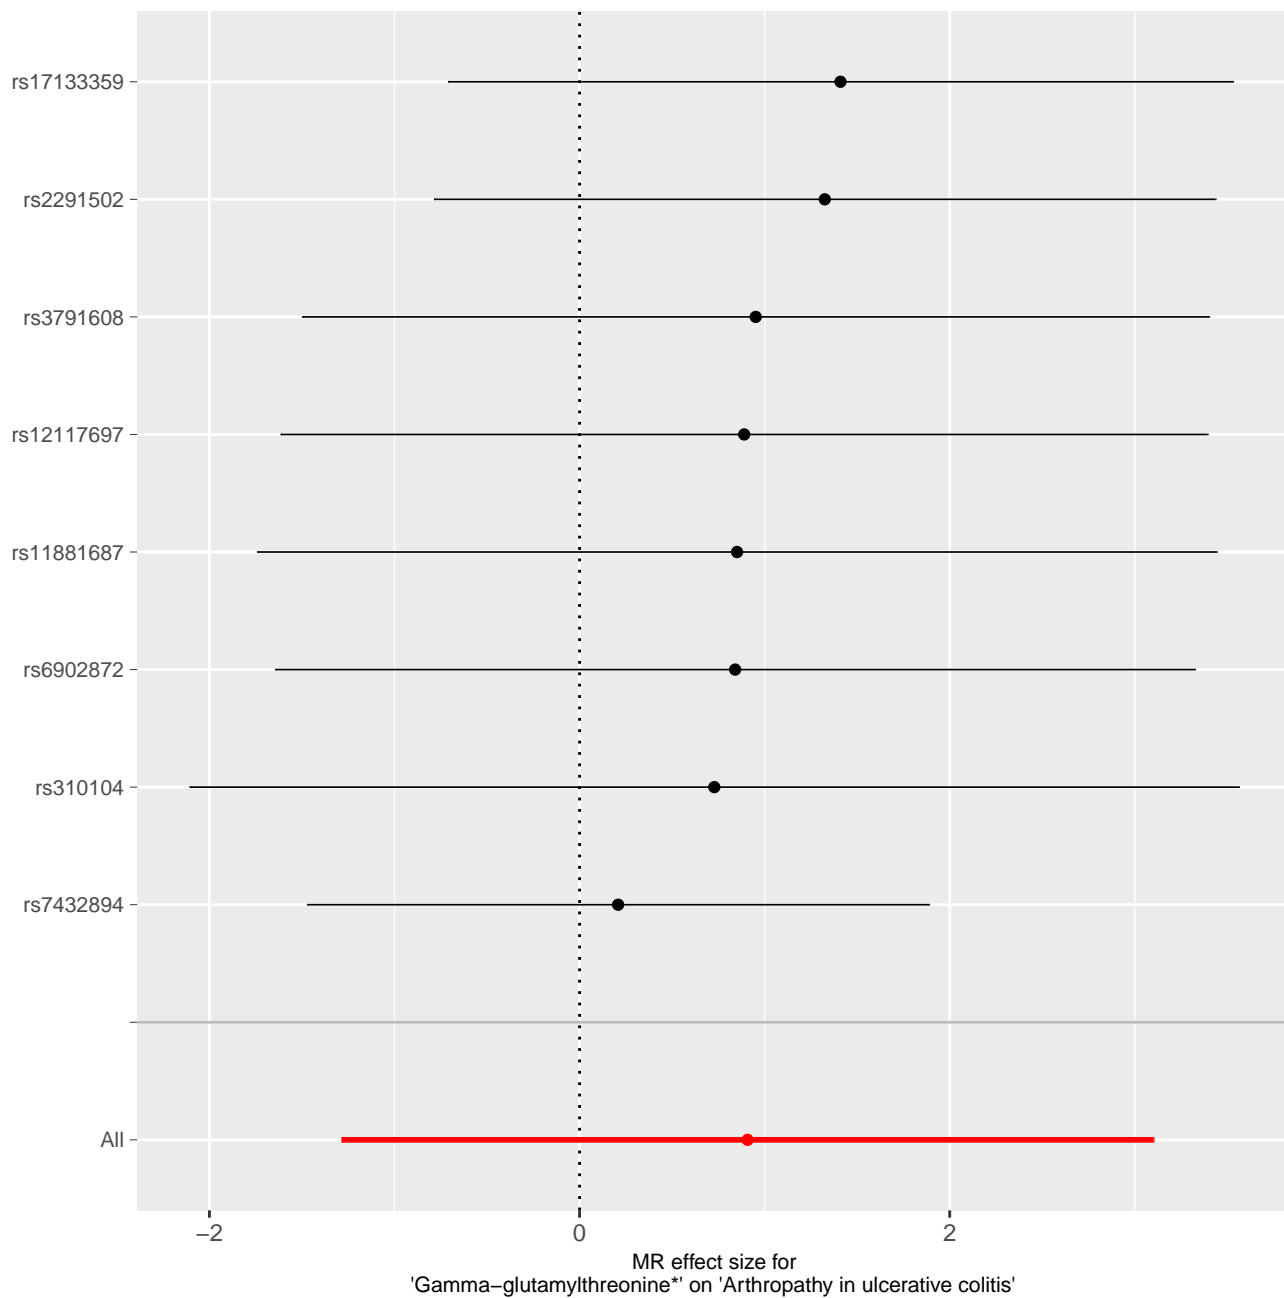

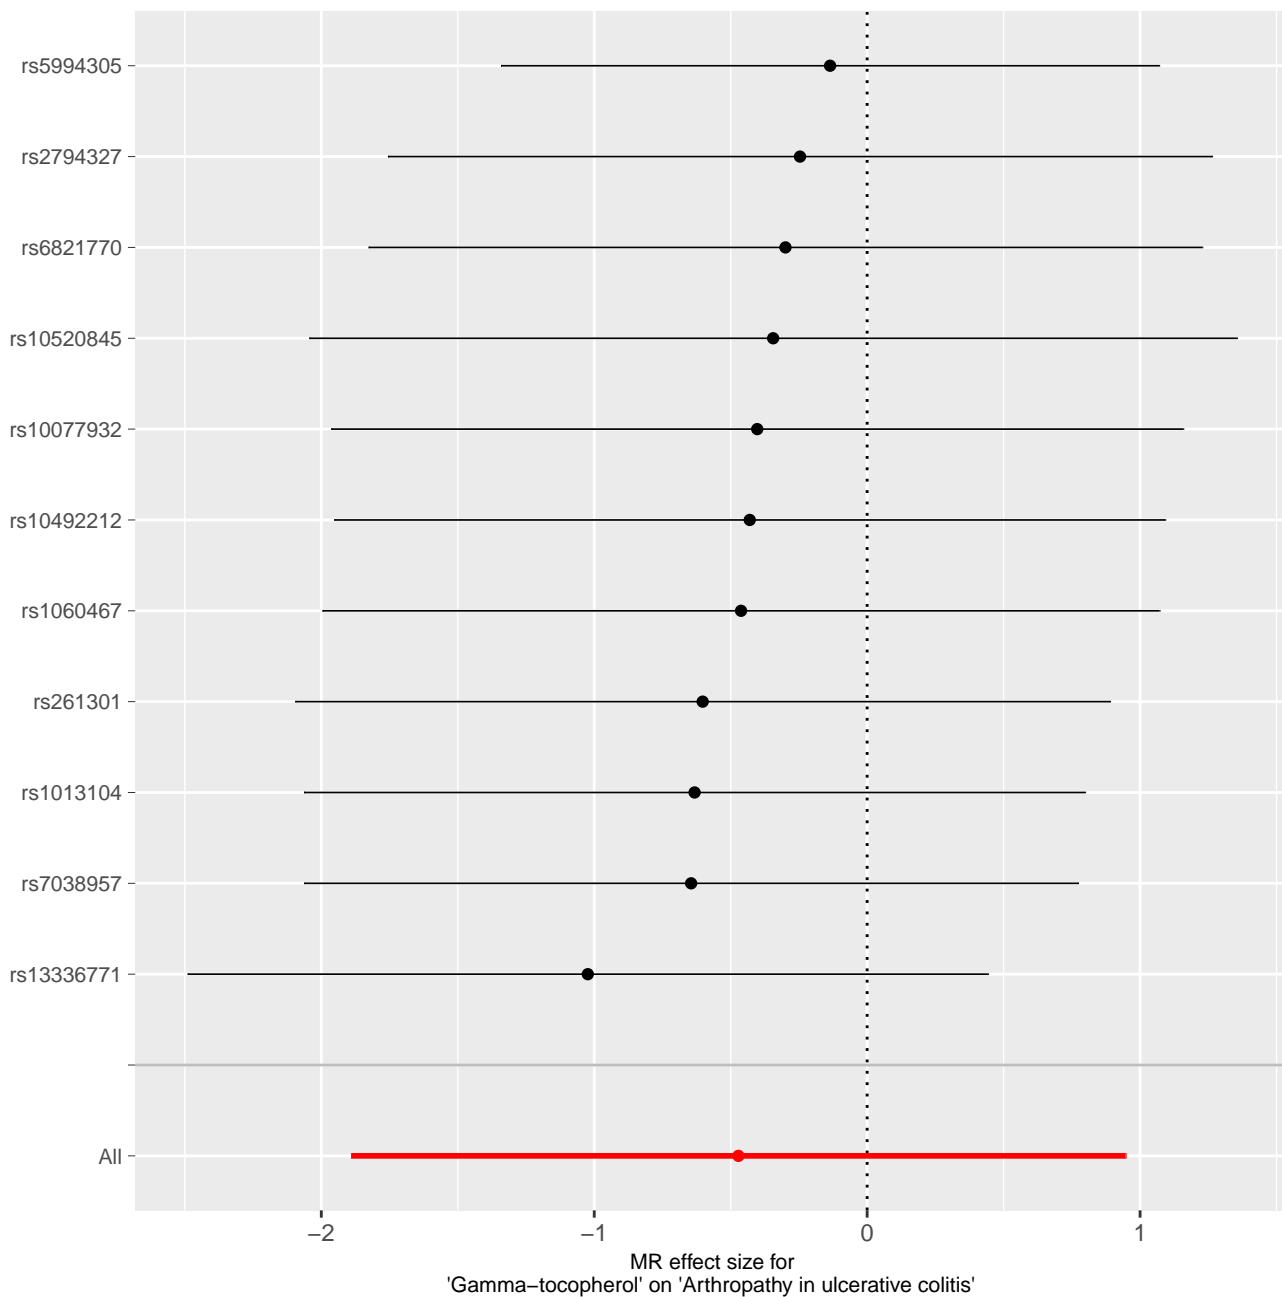

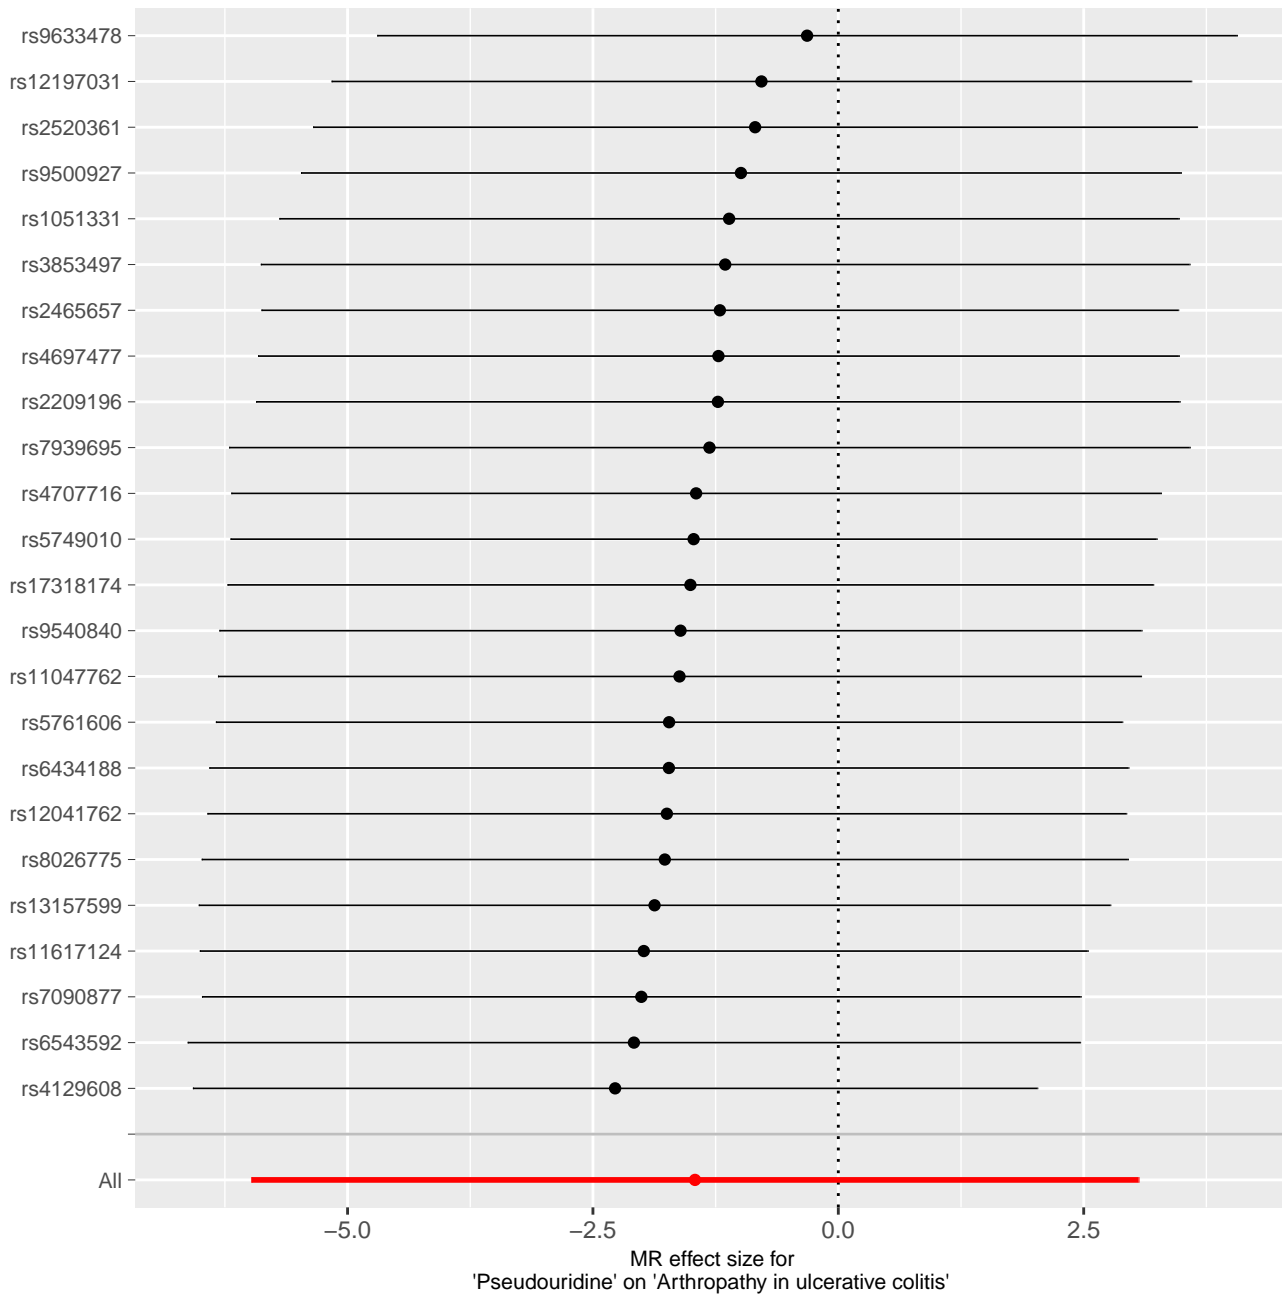

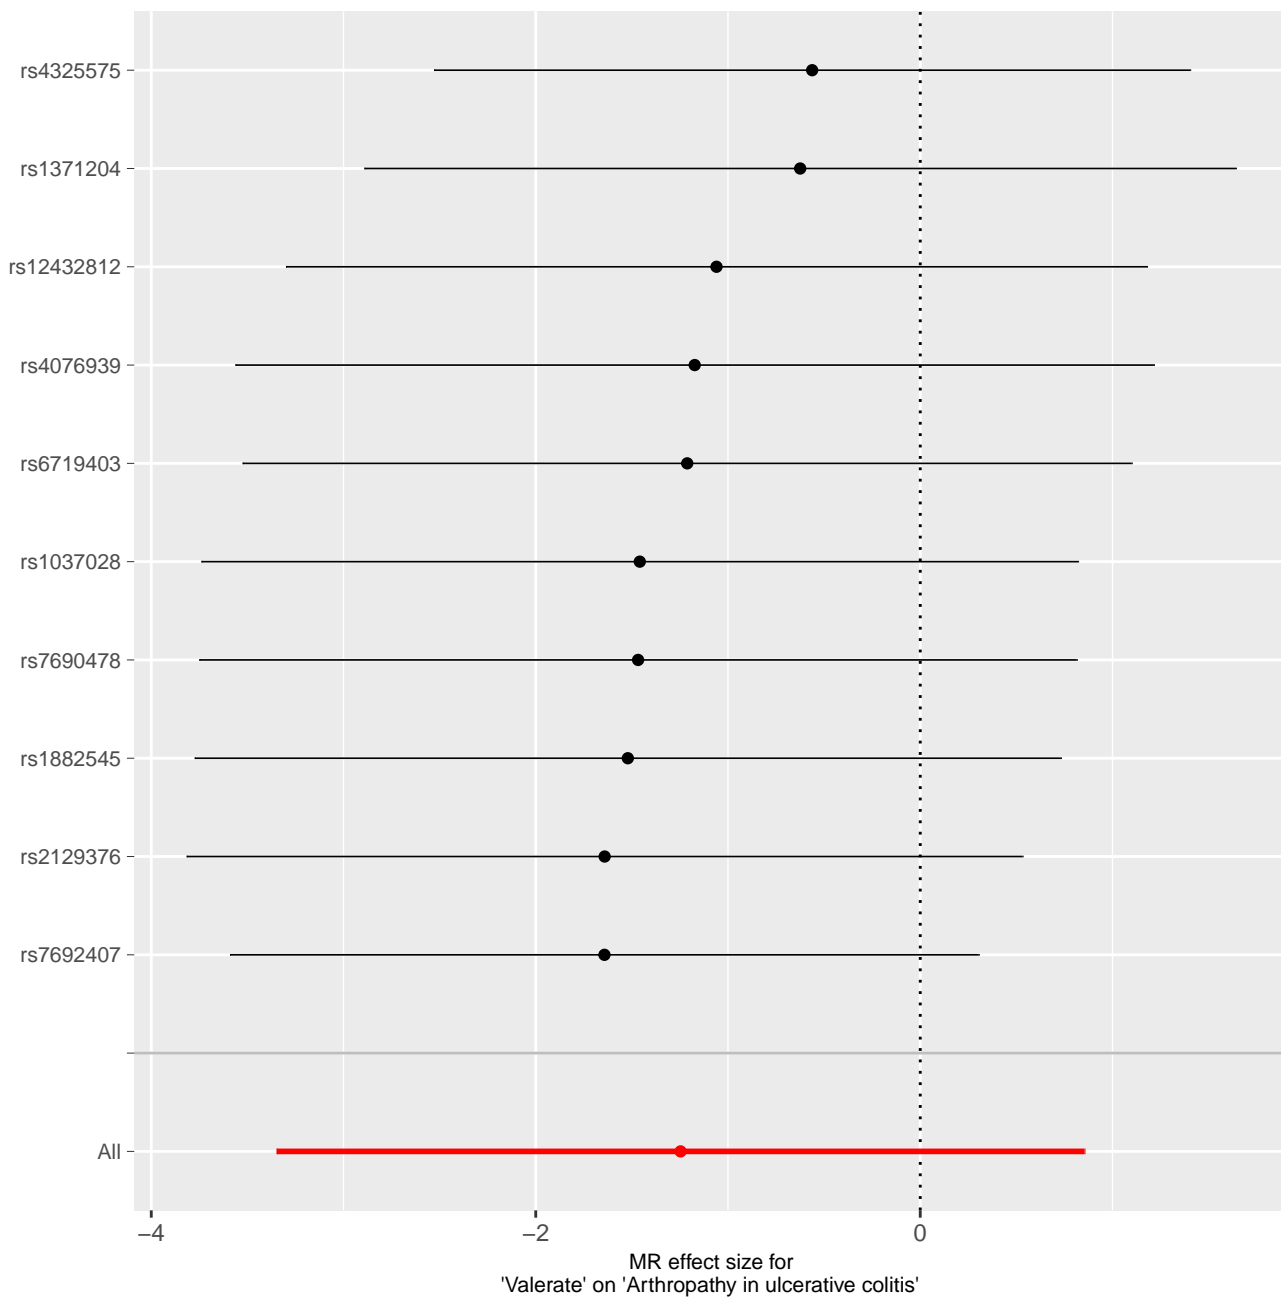

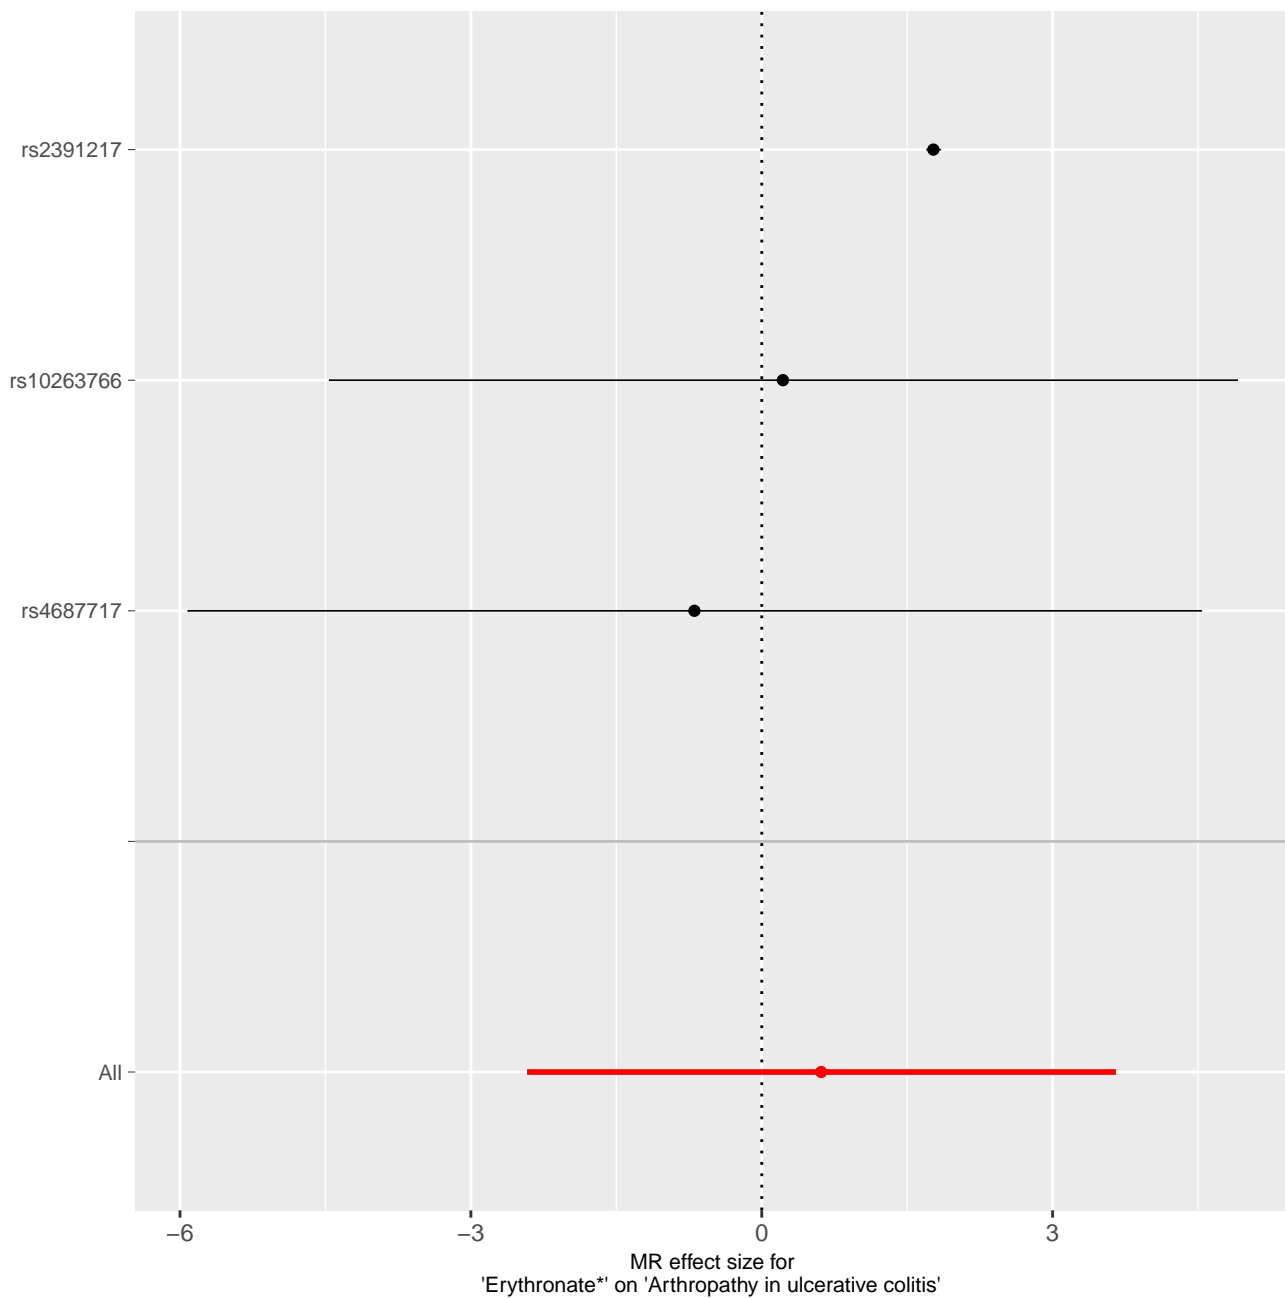

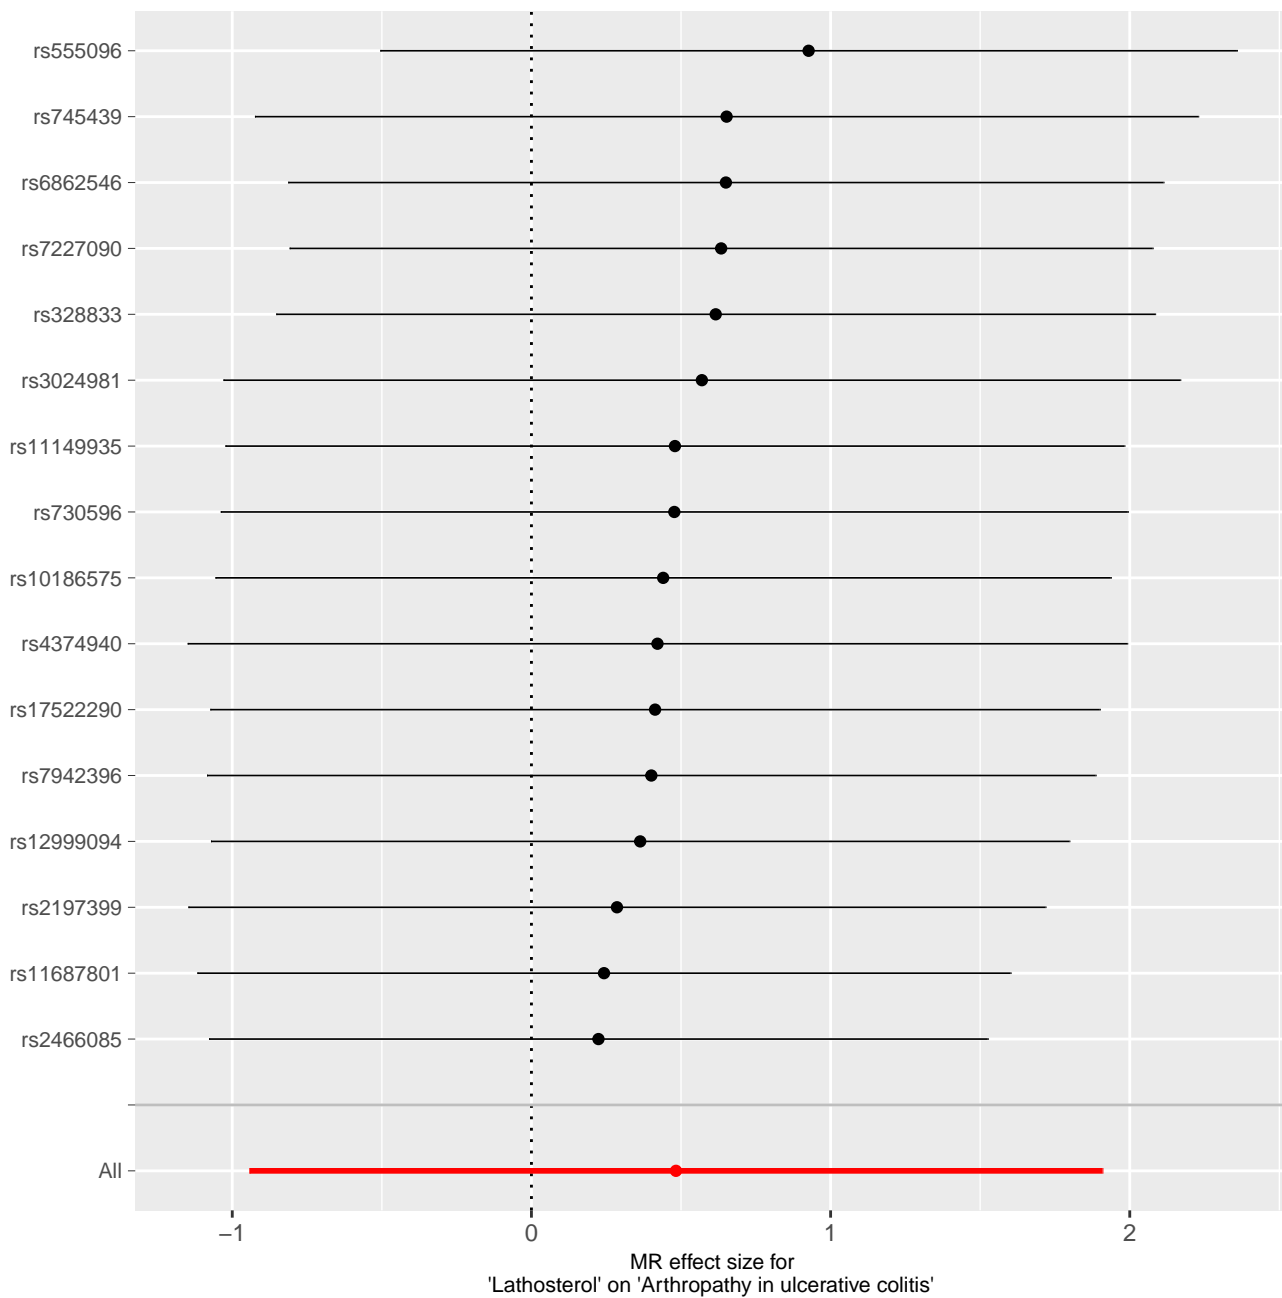

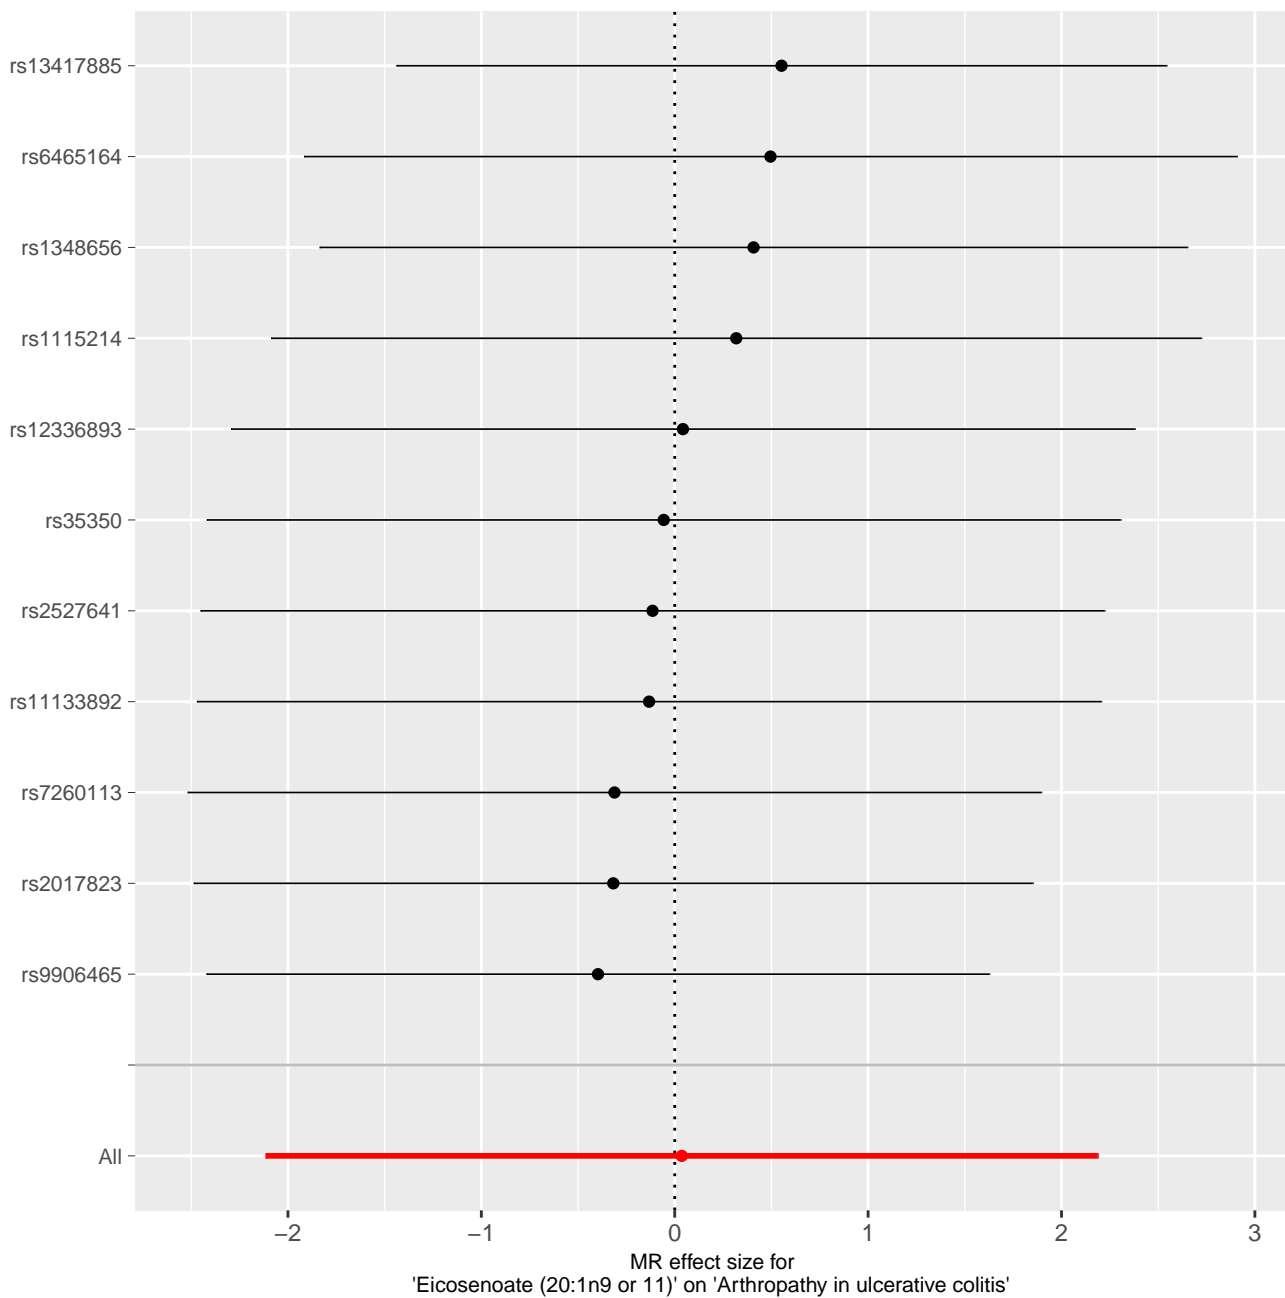

rs6804368

rs7775554

rs8002180

All

-8

-4

0

MR effect size for

'X-12244--N-acetylcarnosine' on 'Arthropathy in ulcerative colitis'

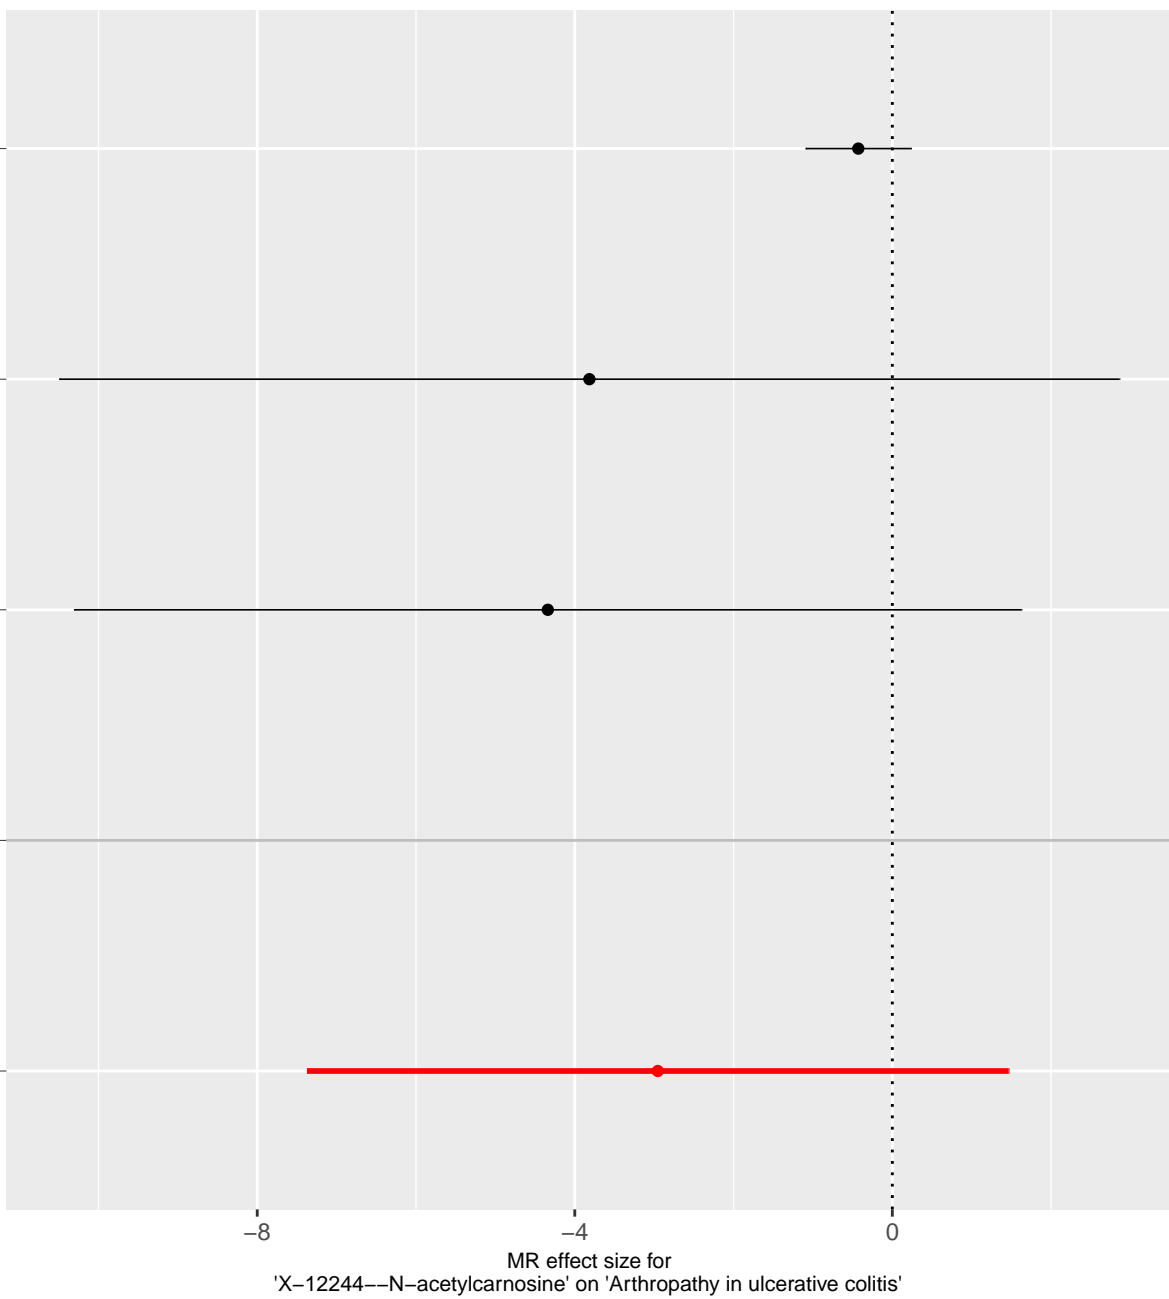



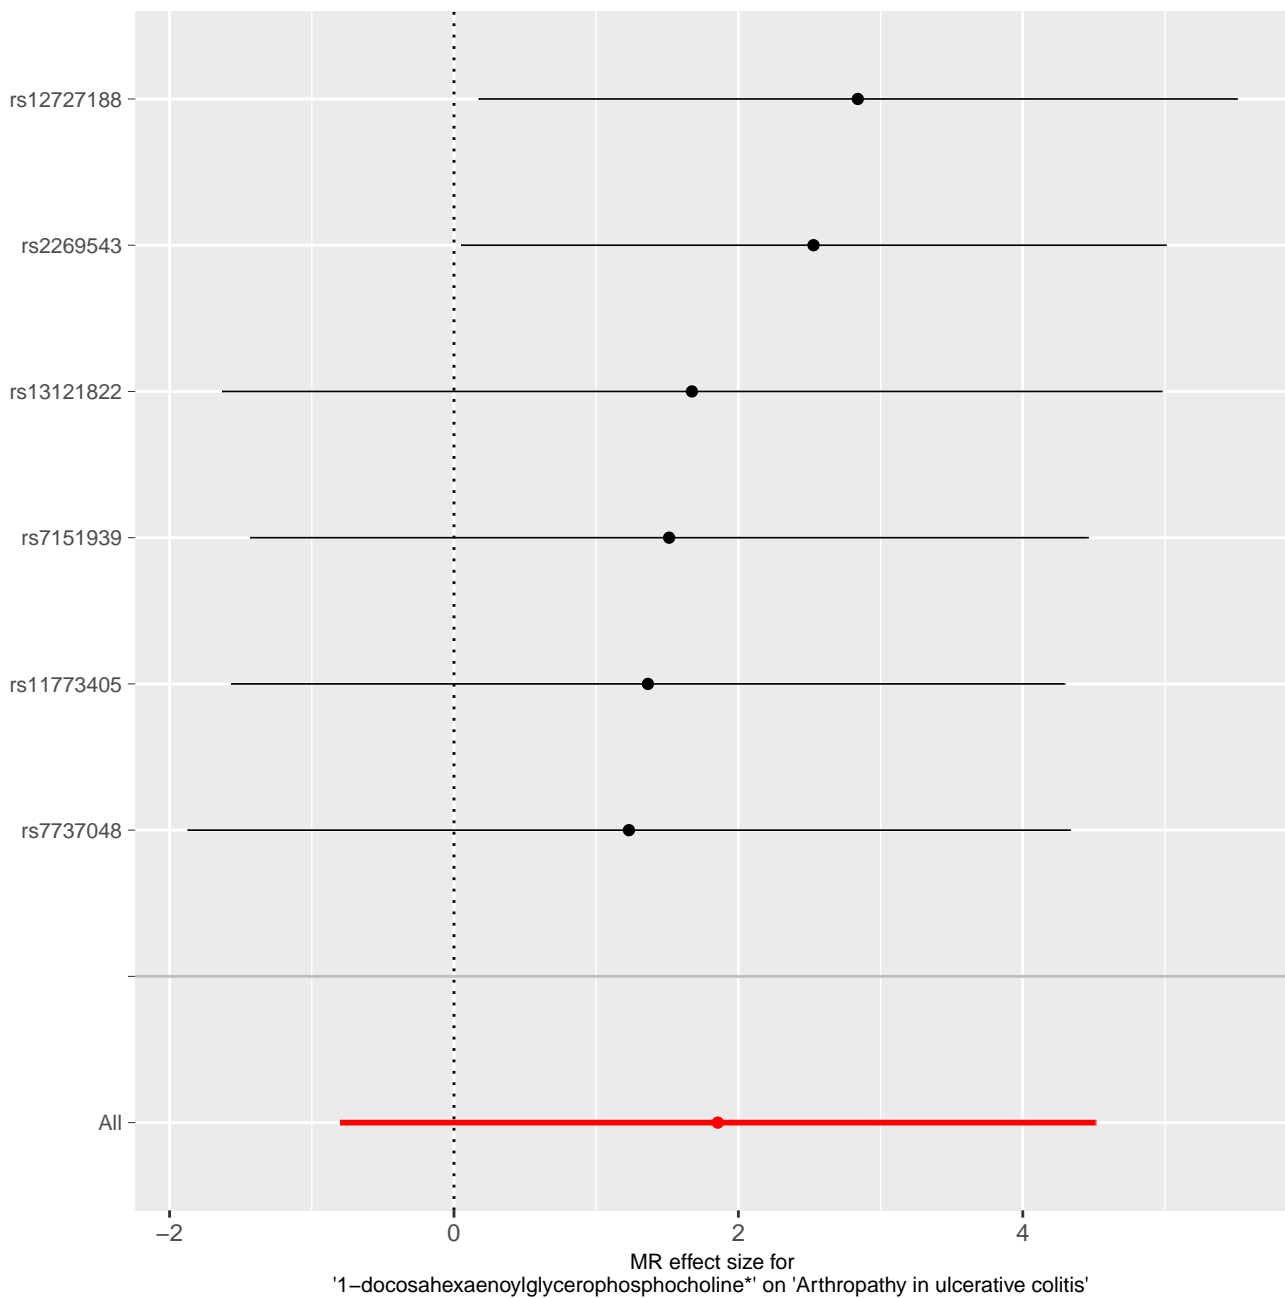

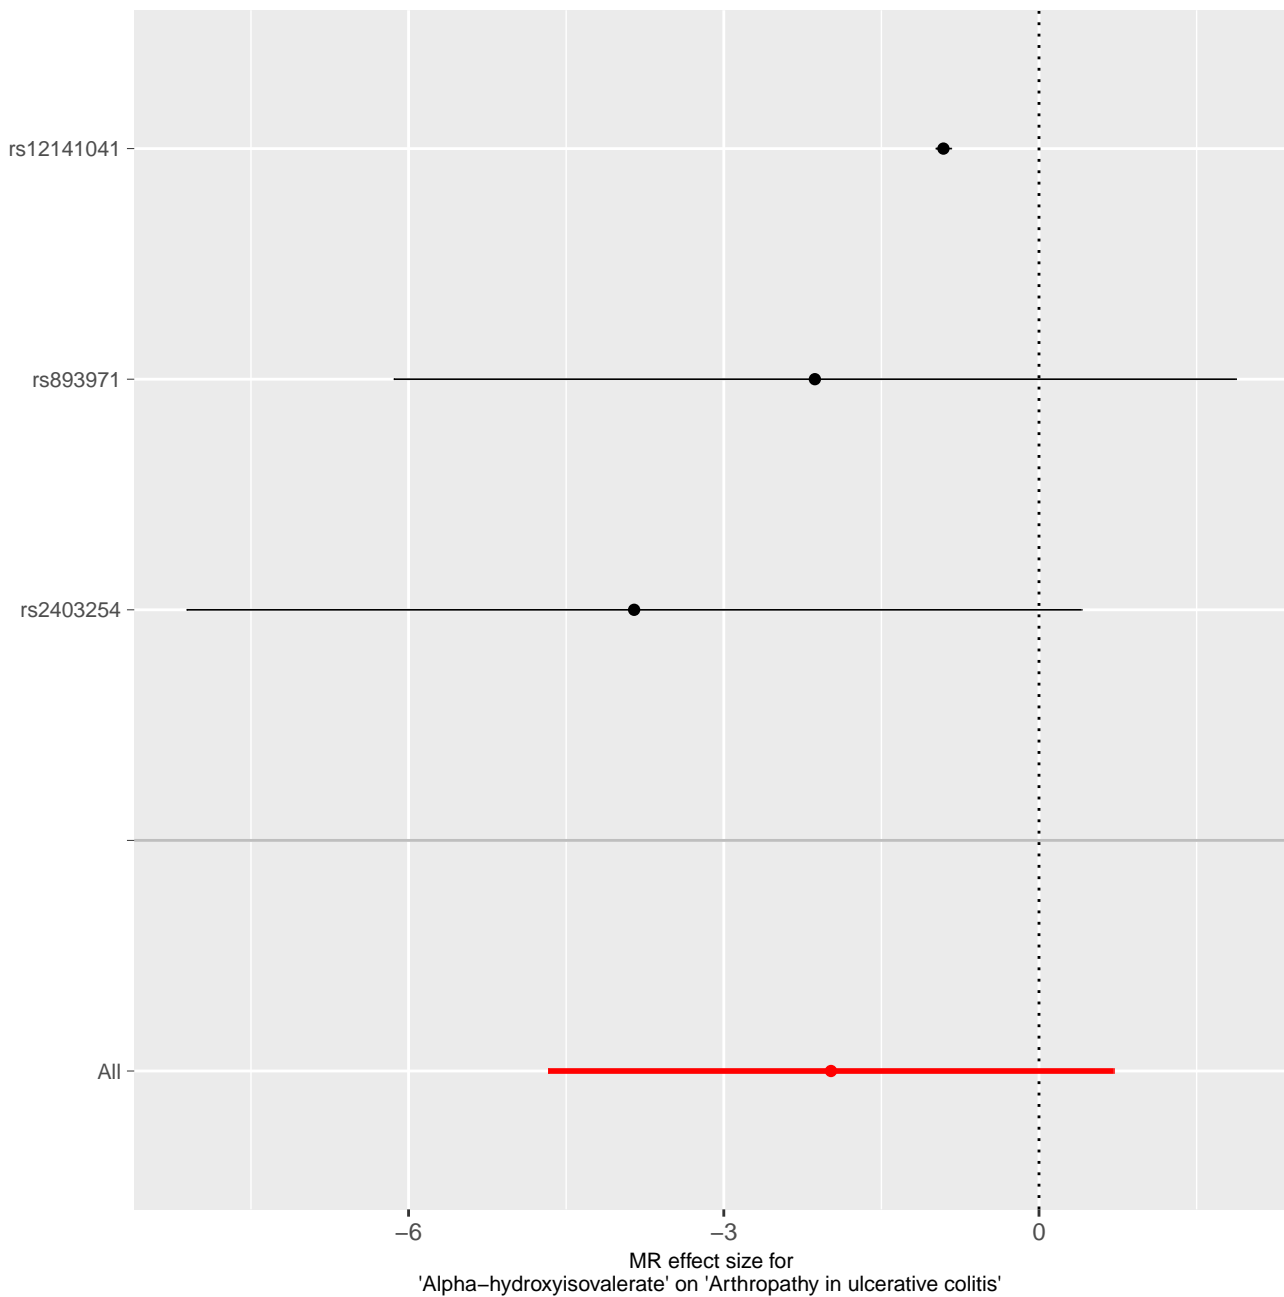

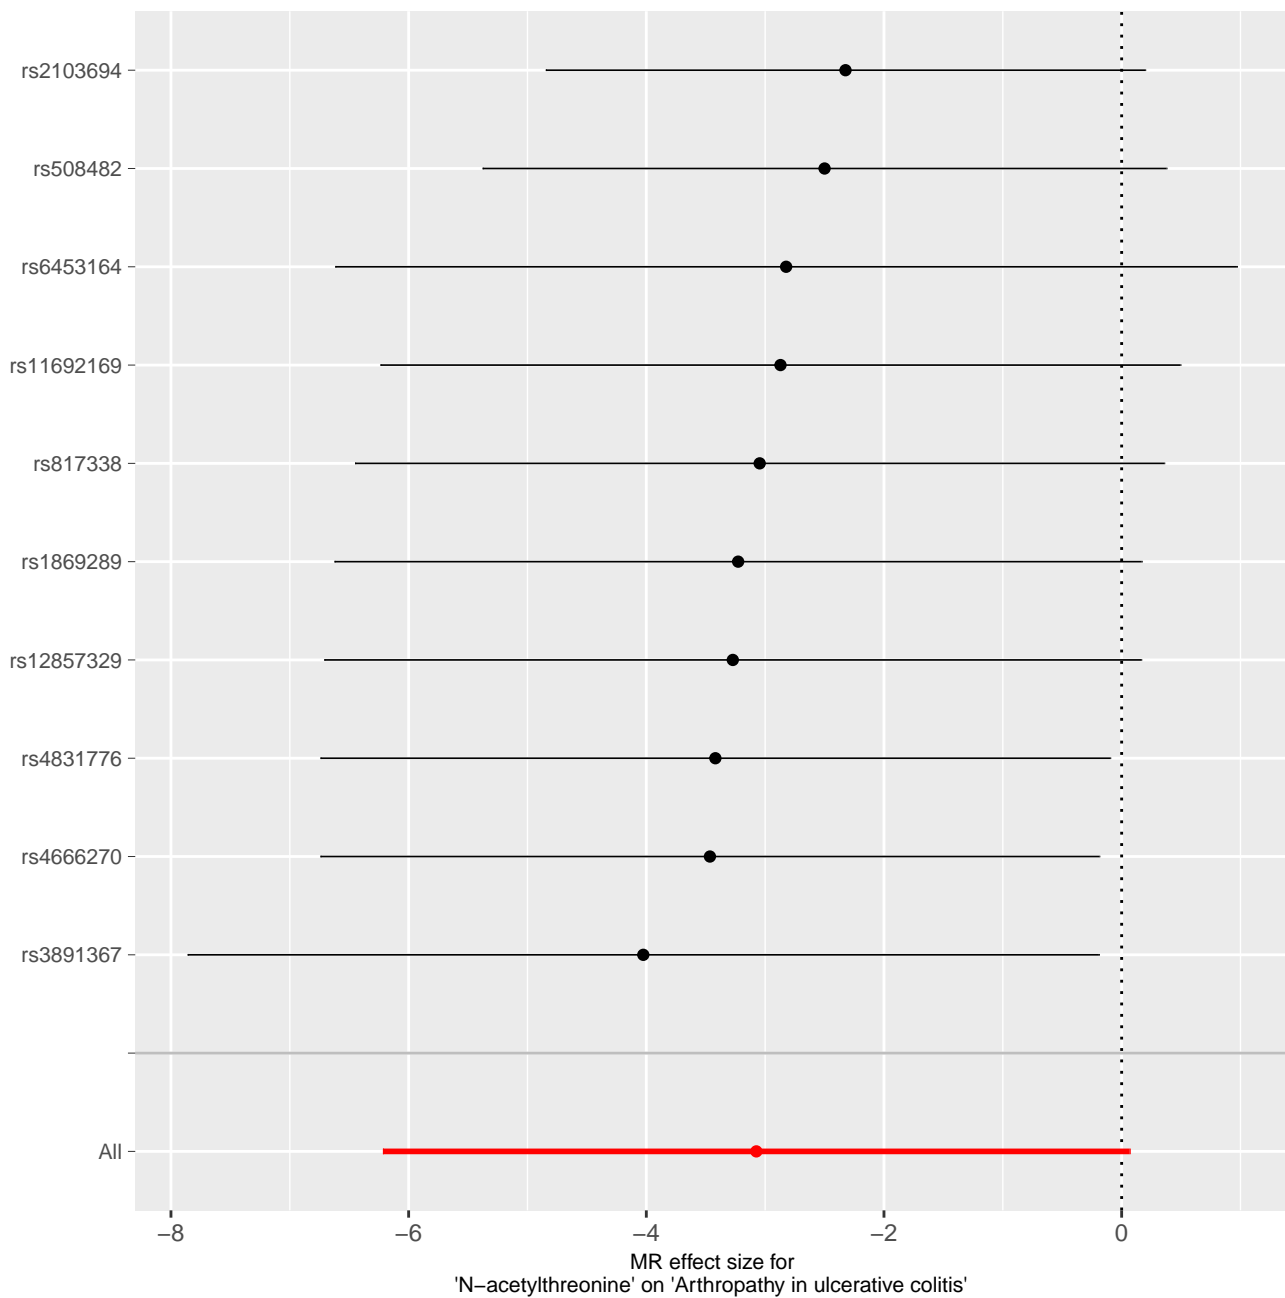

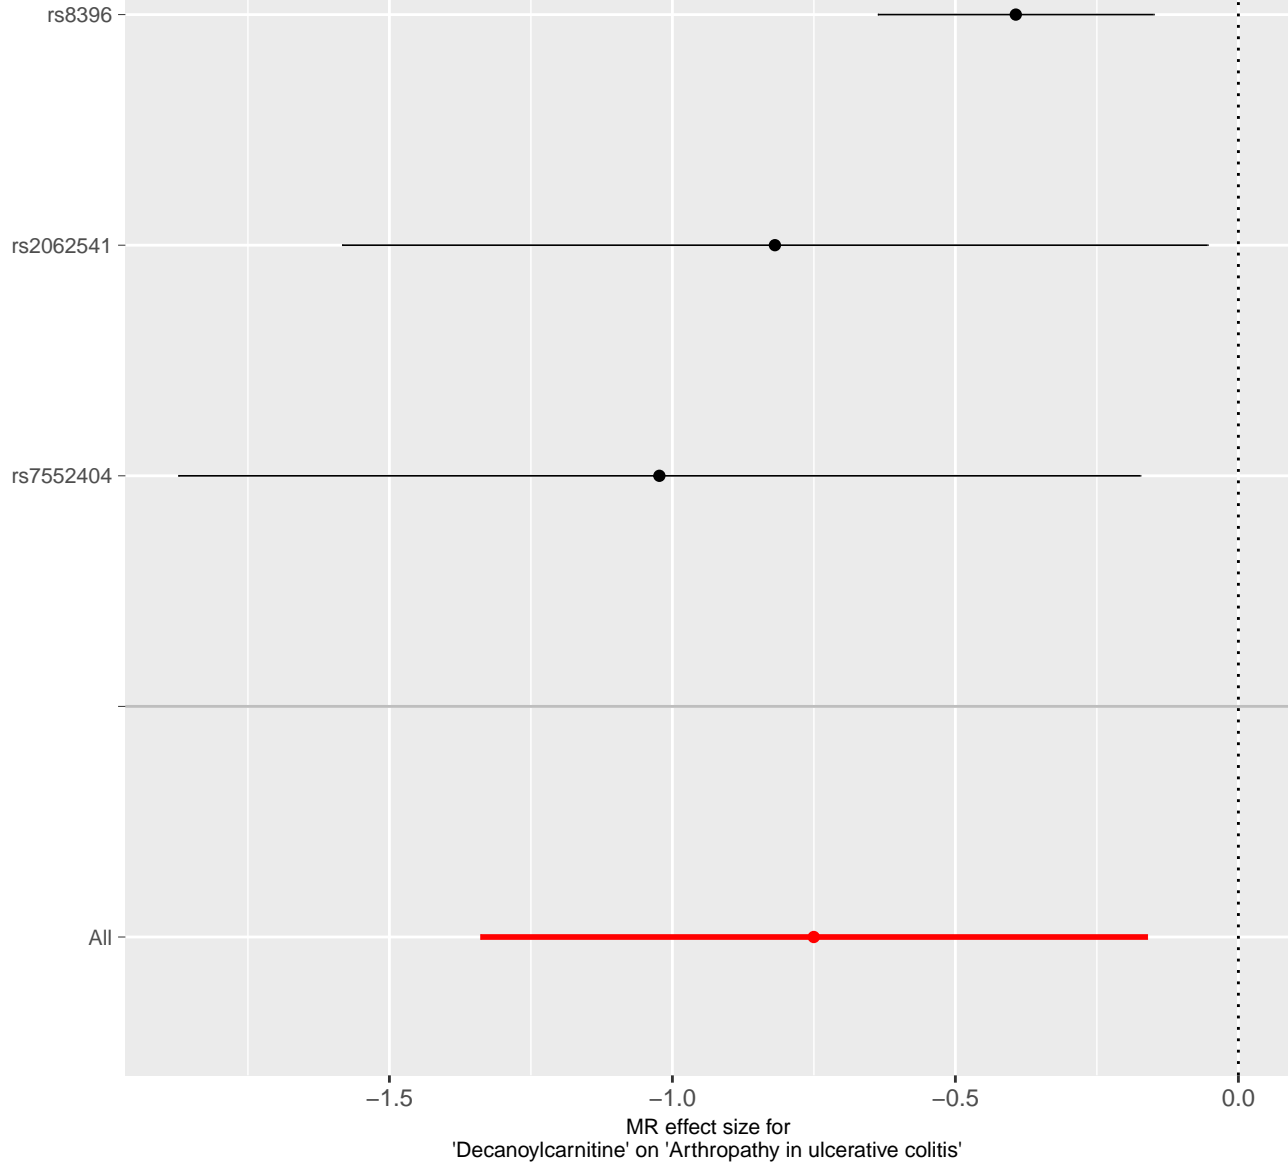

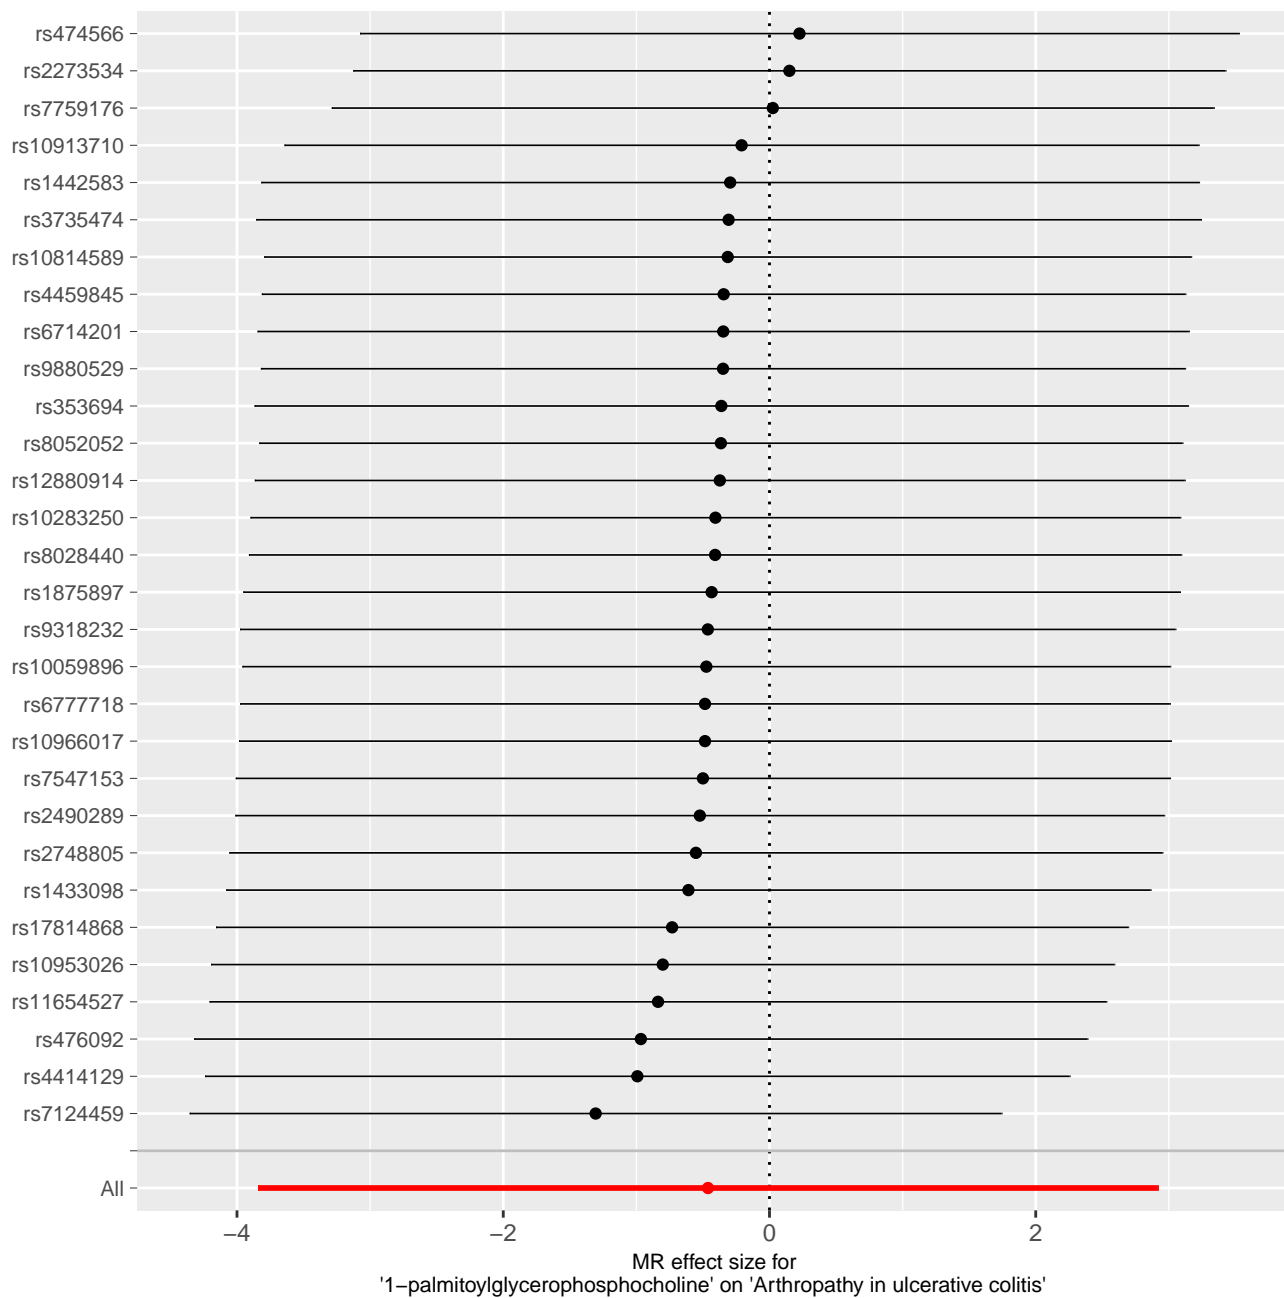

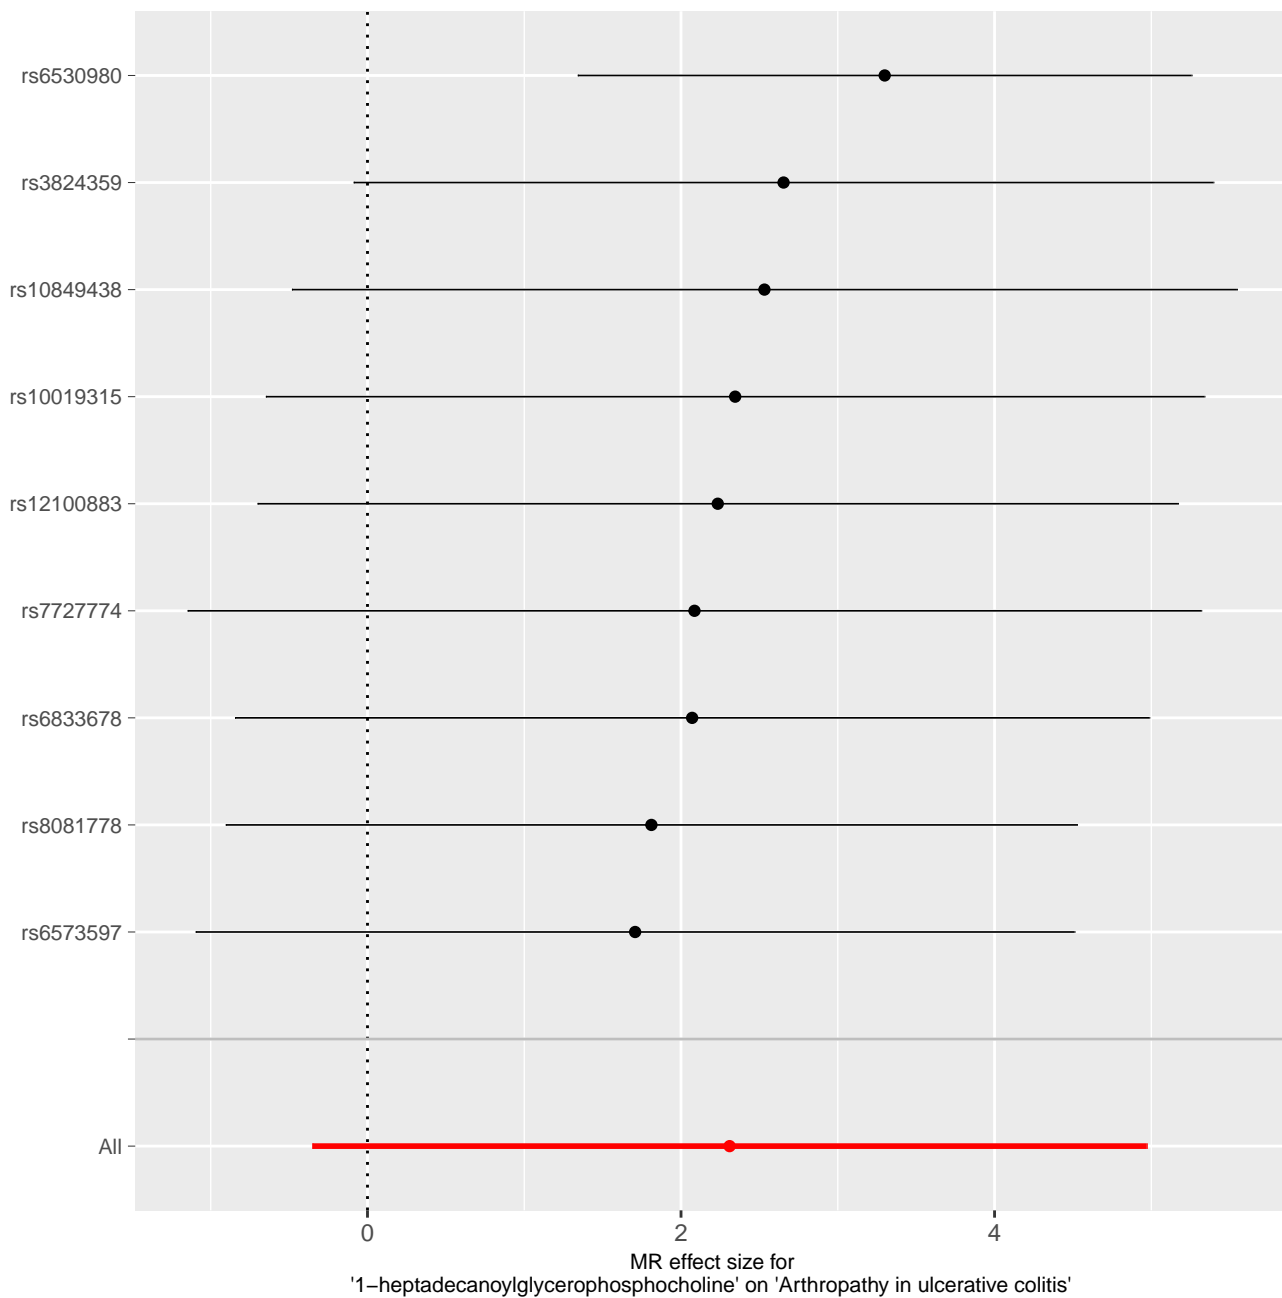

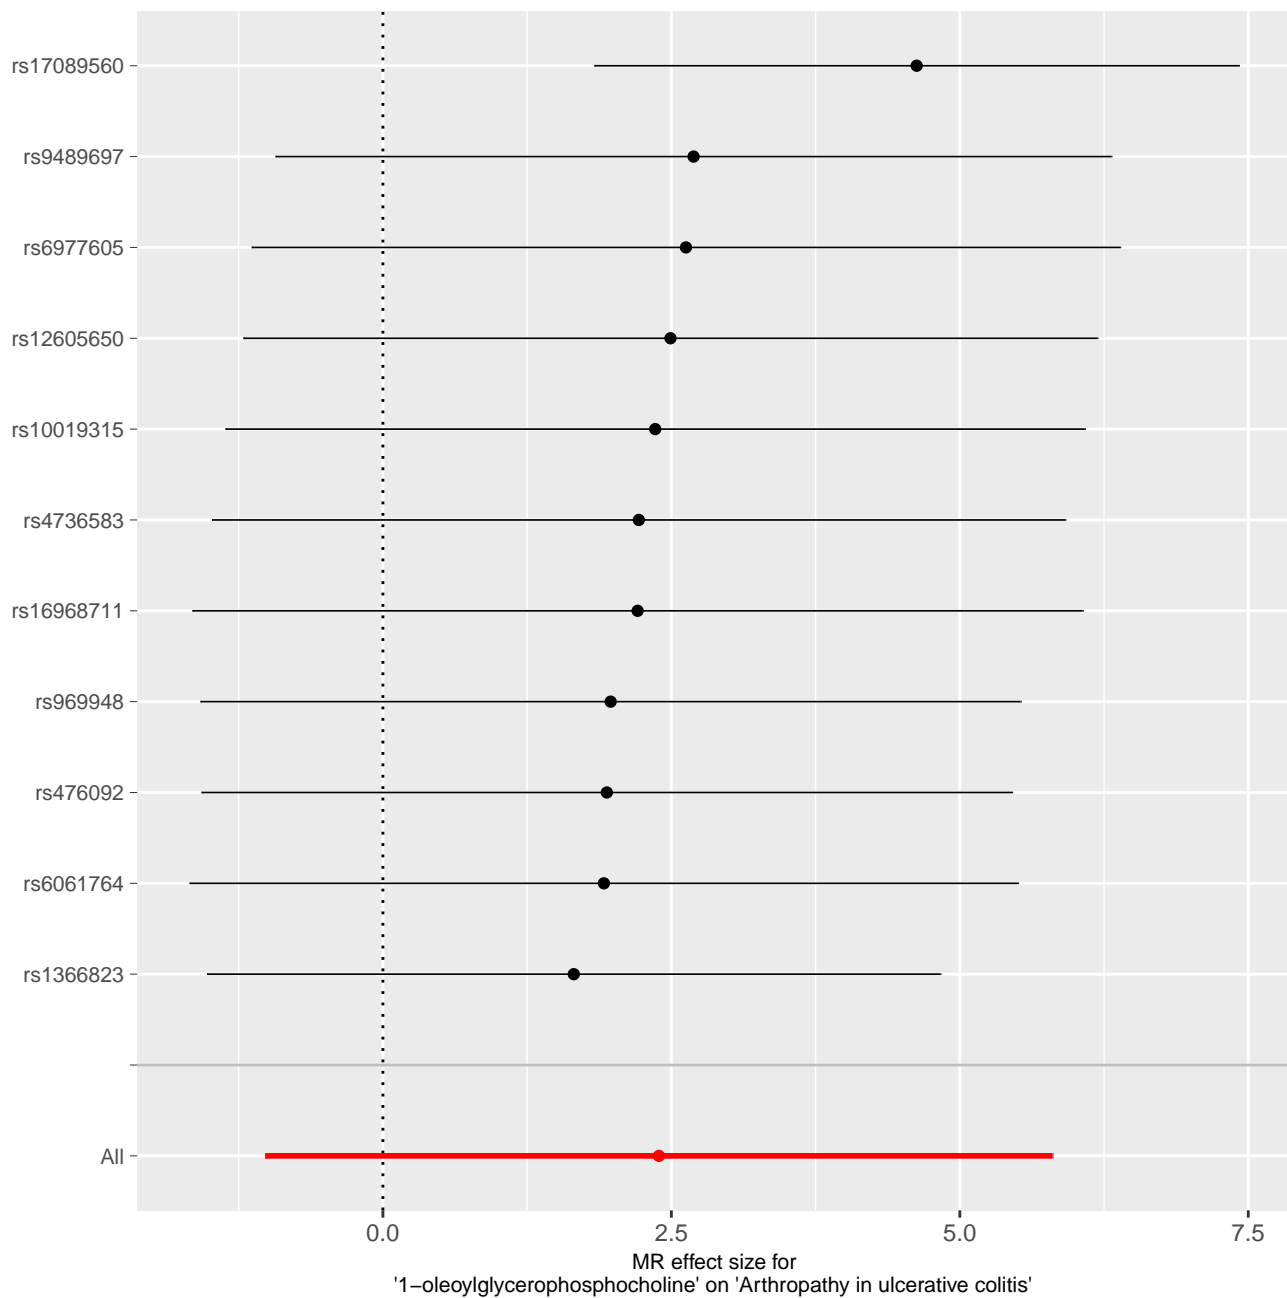

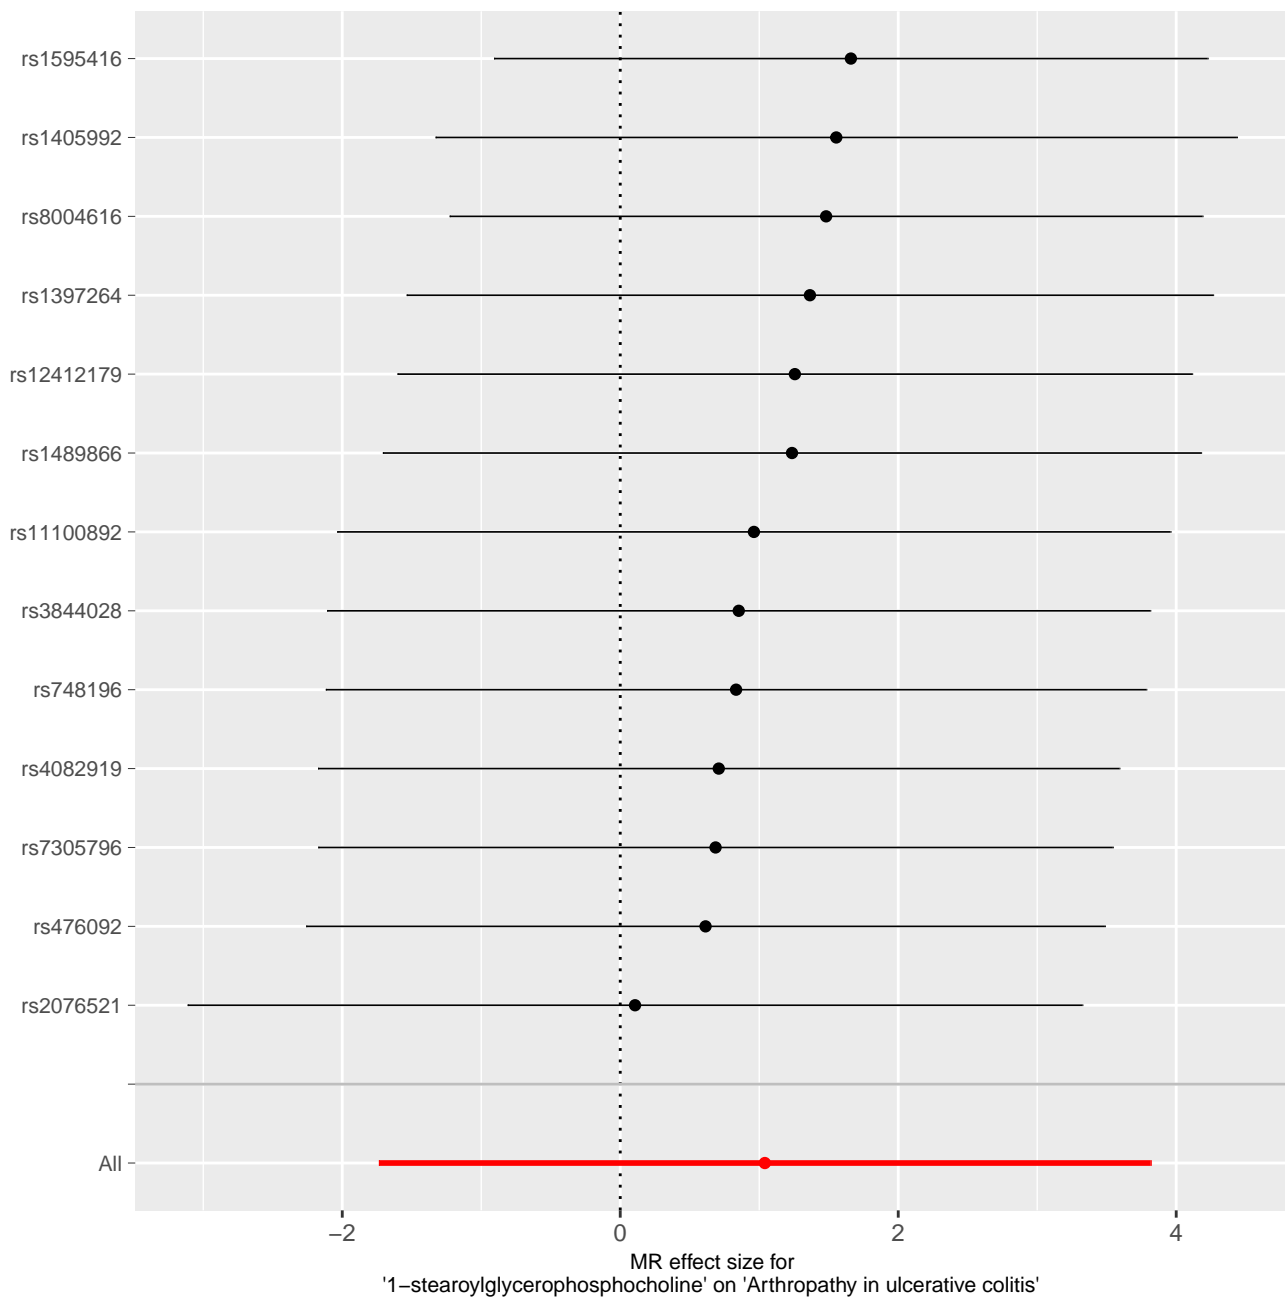



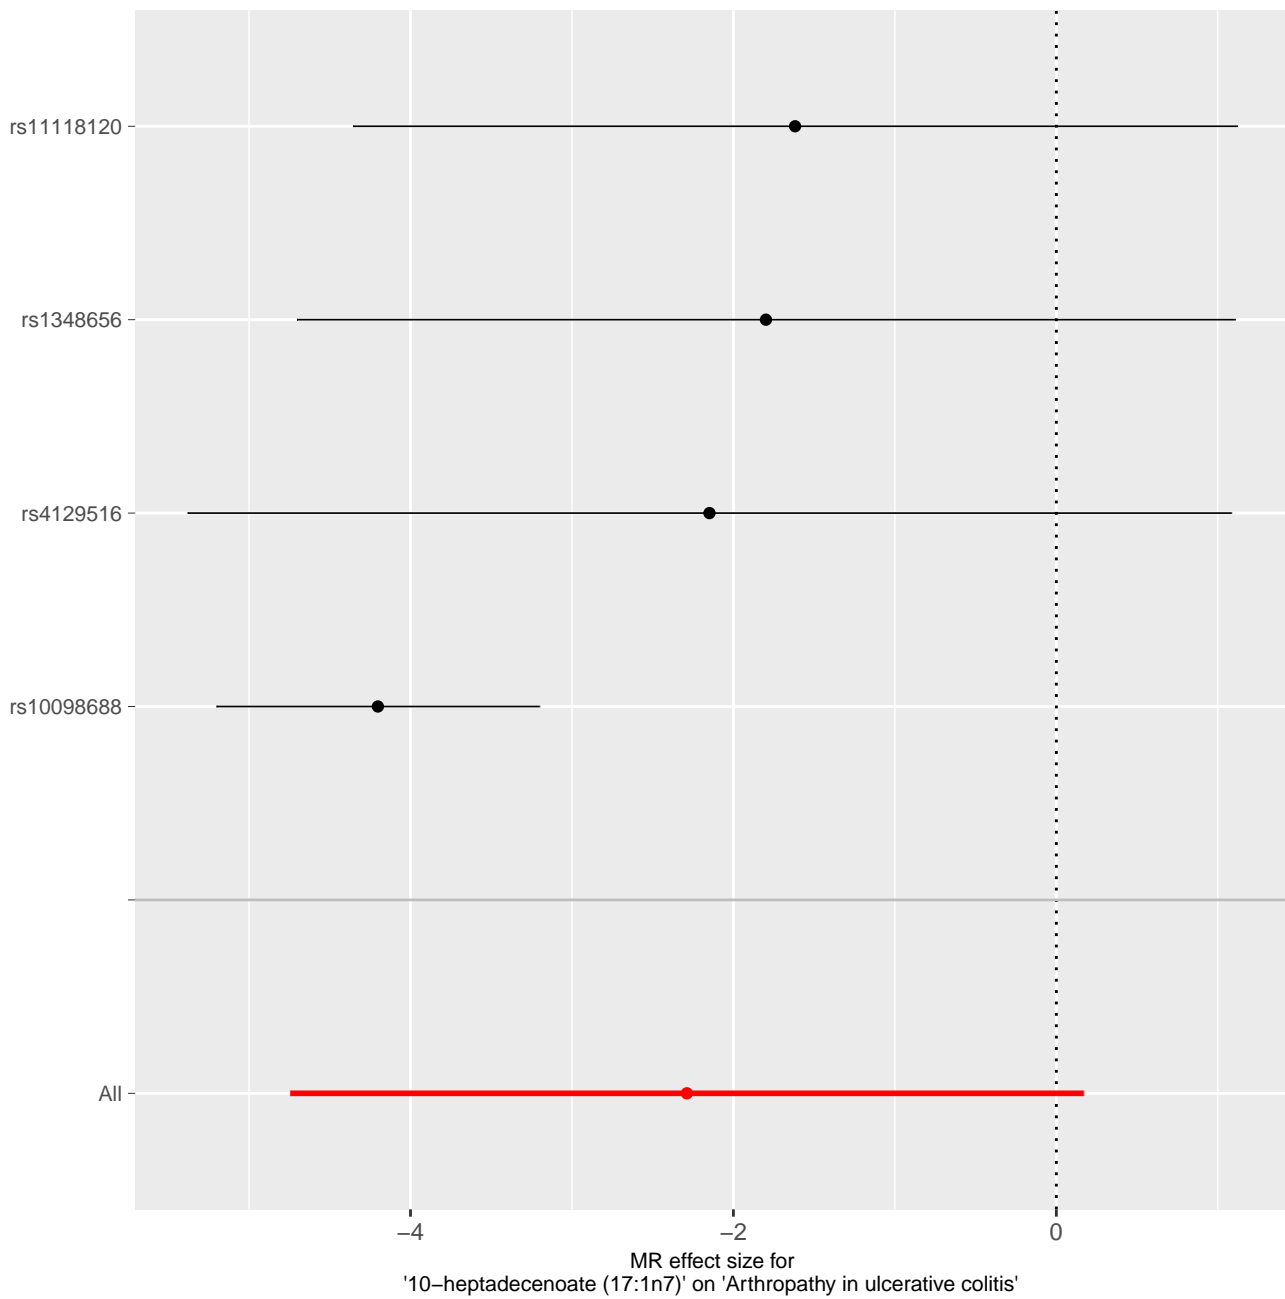

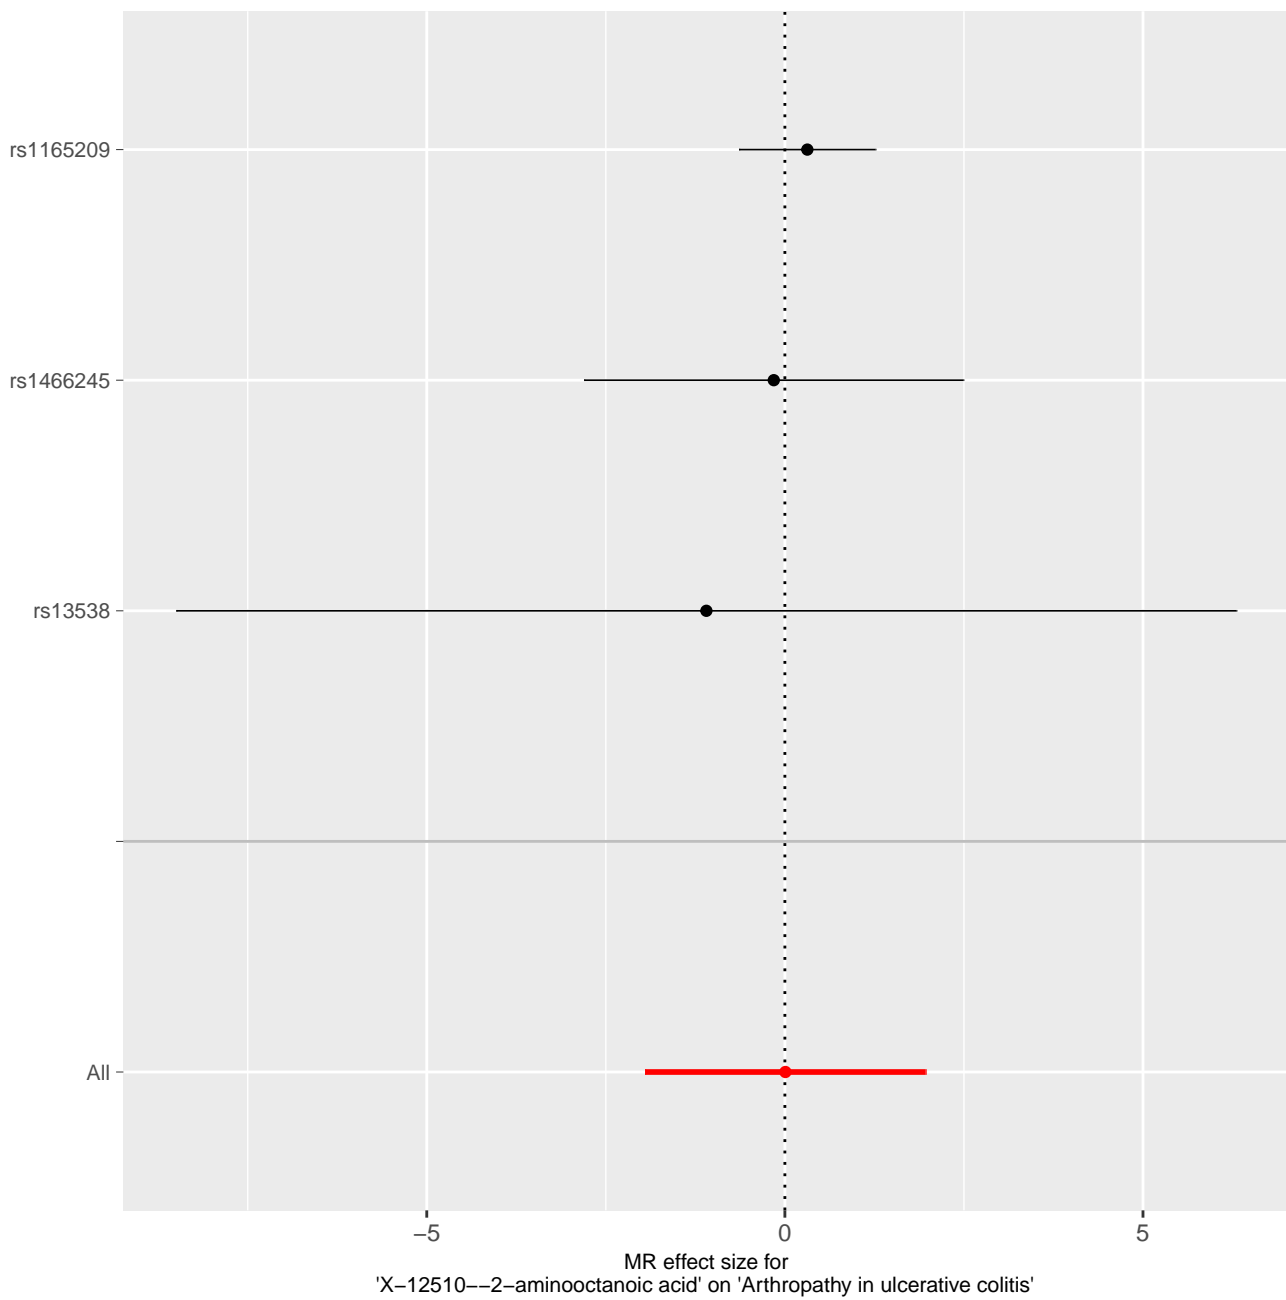

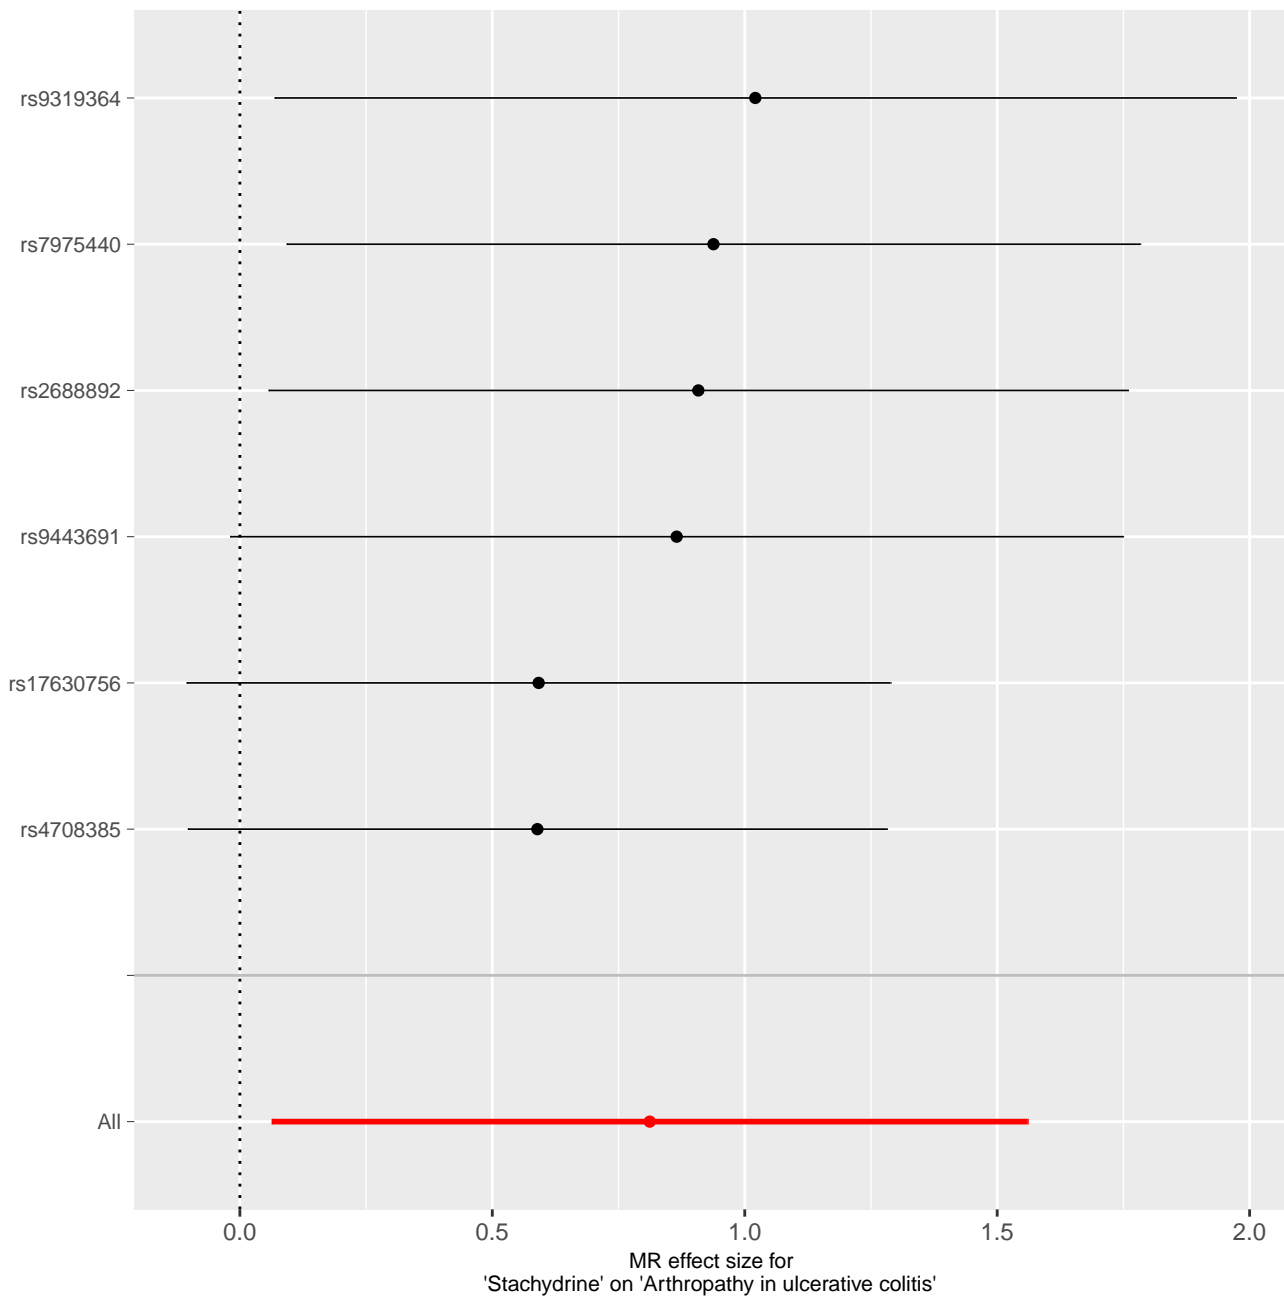

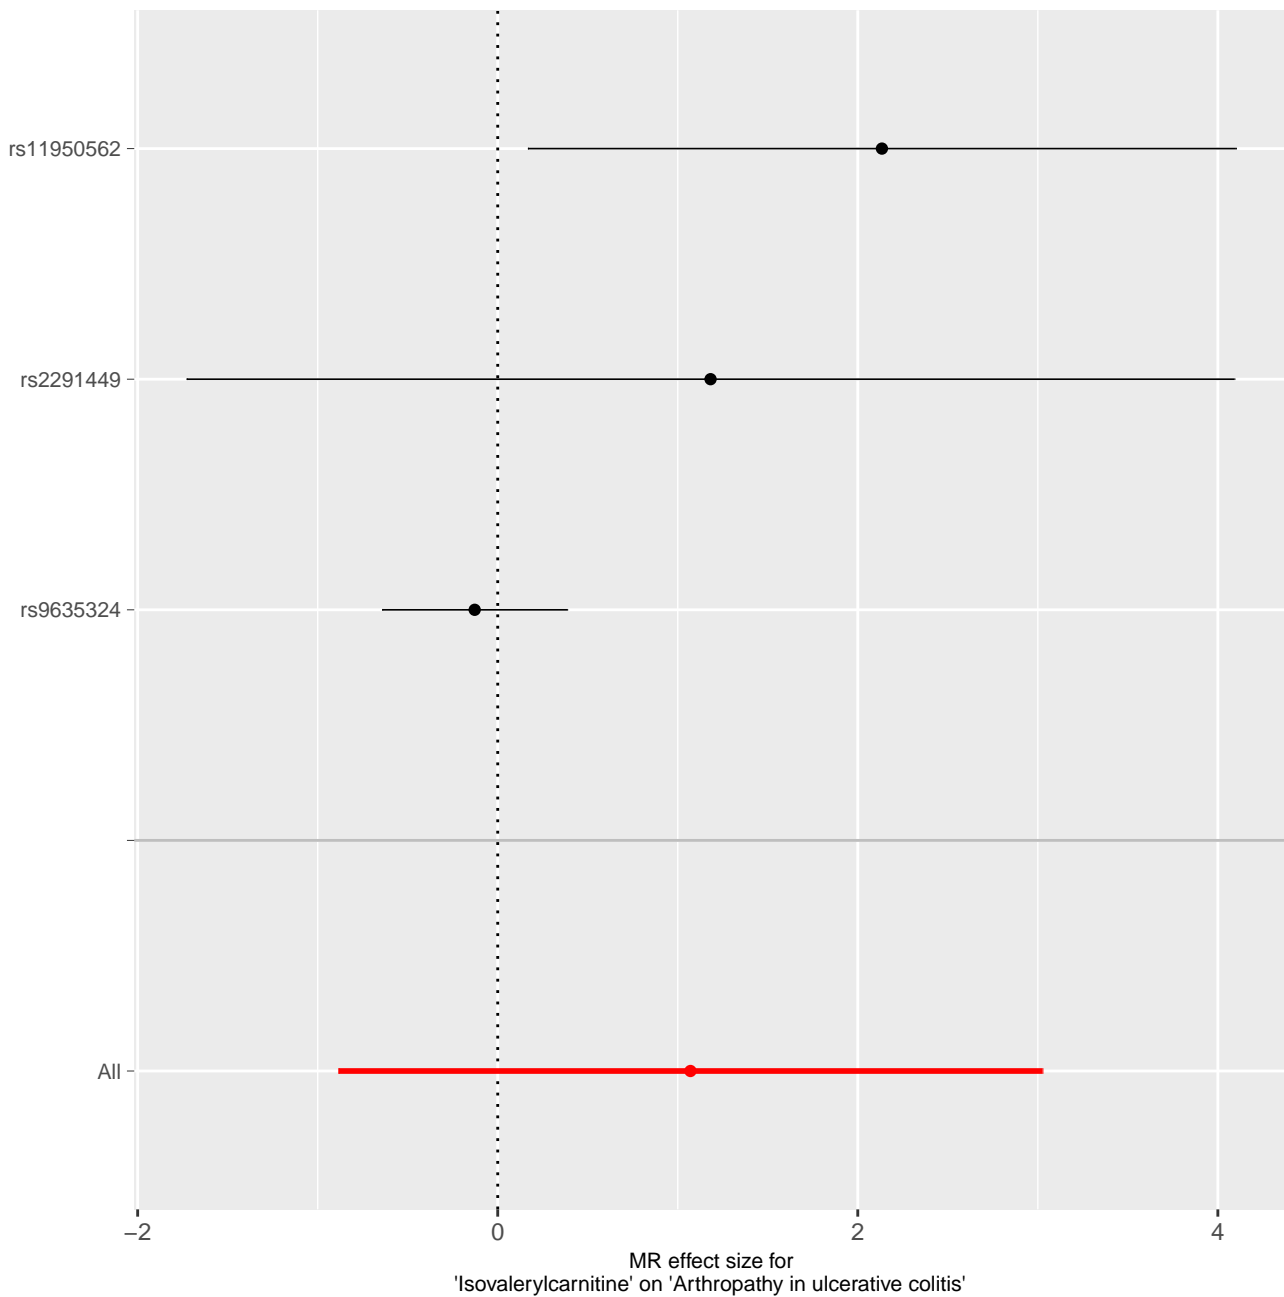

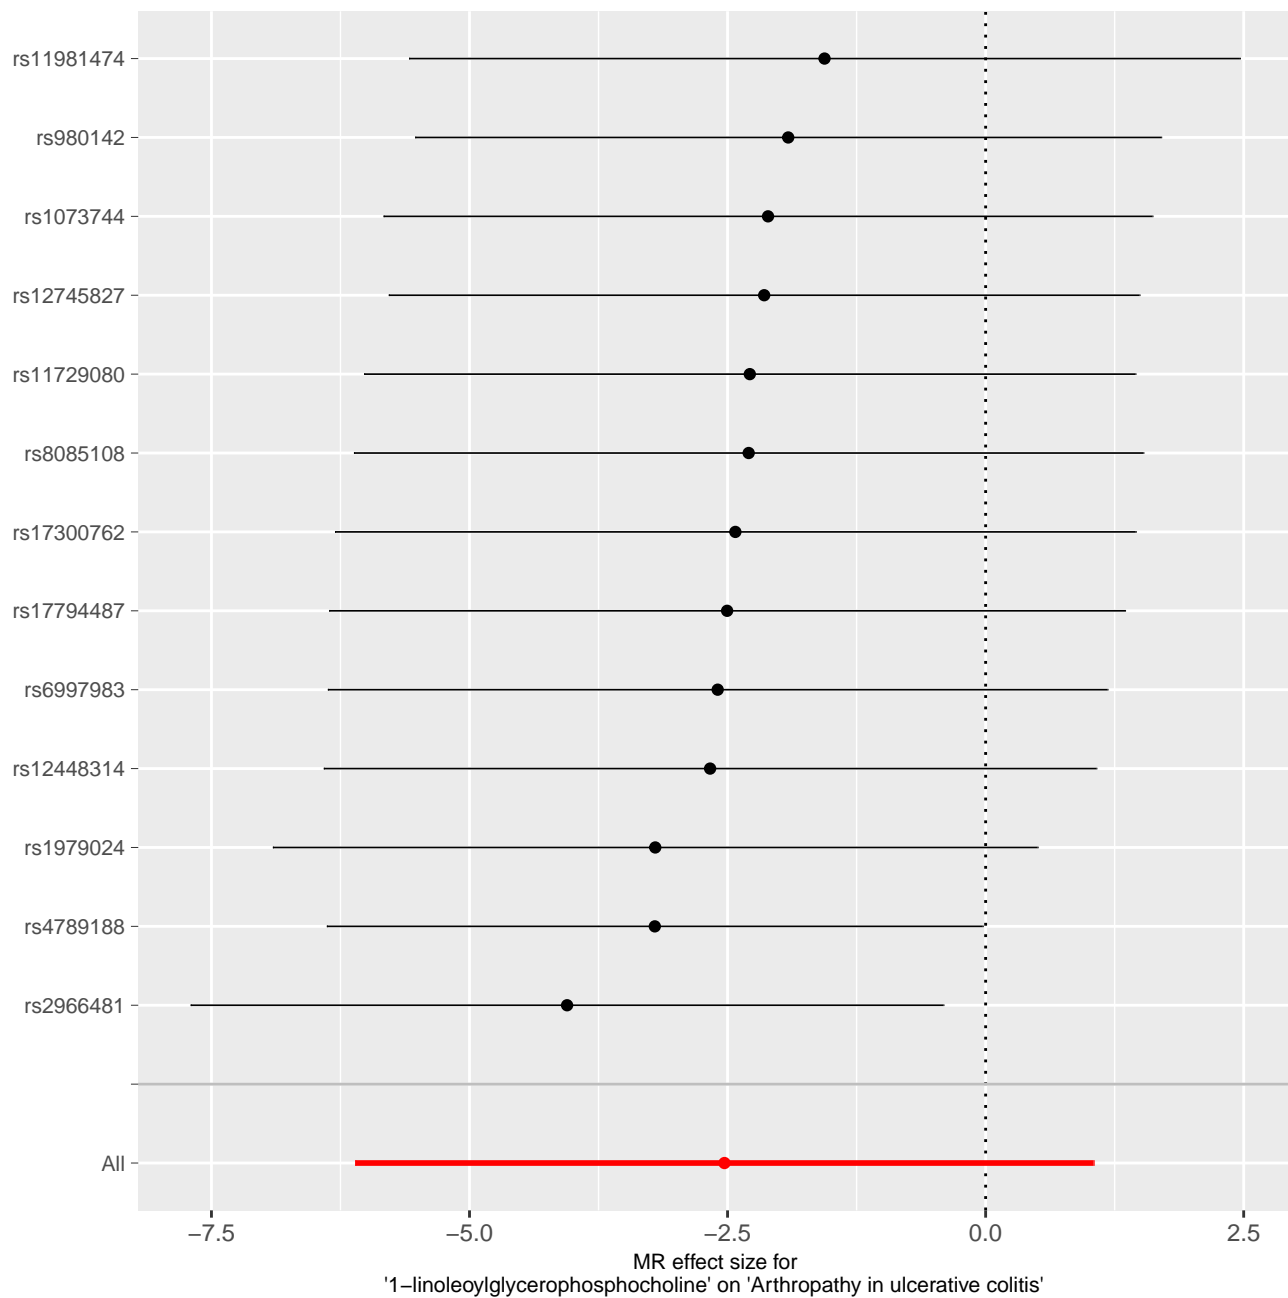

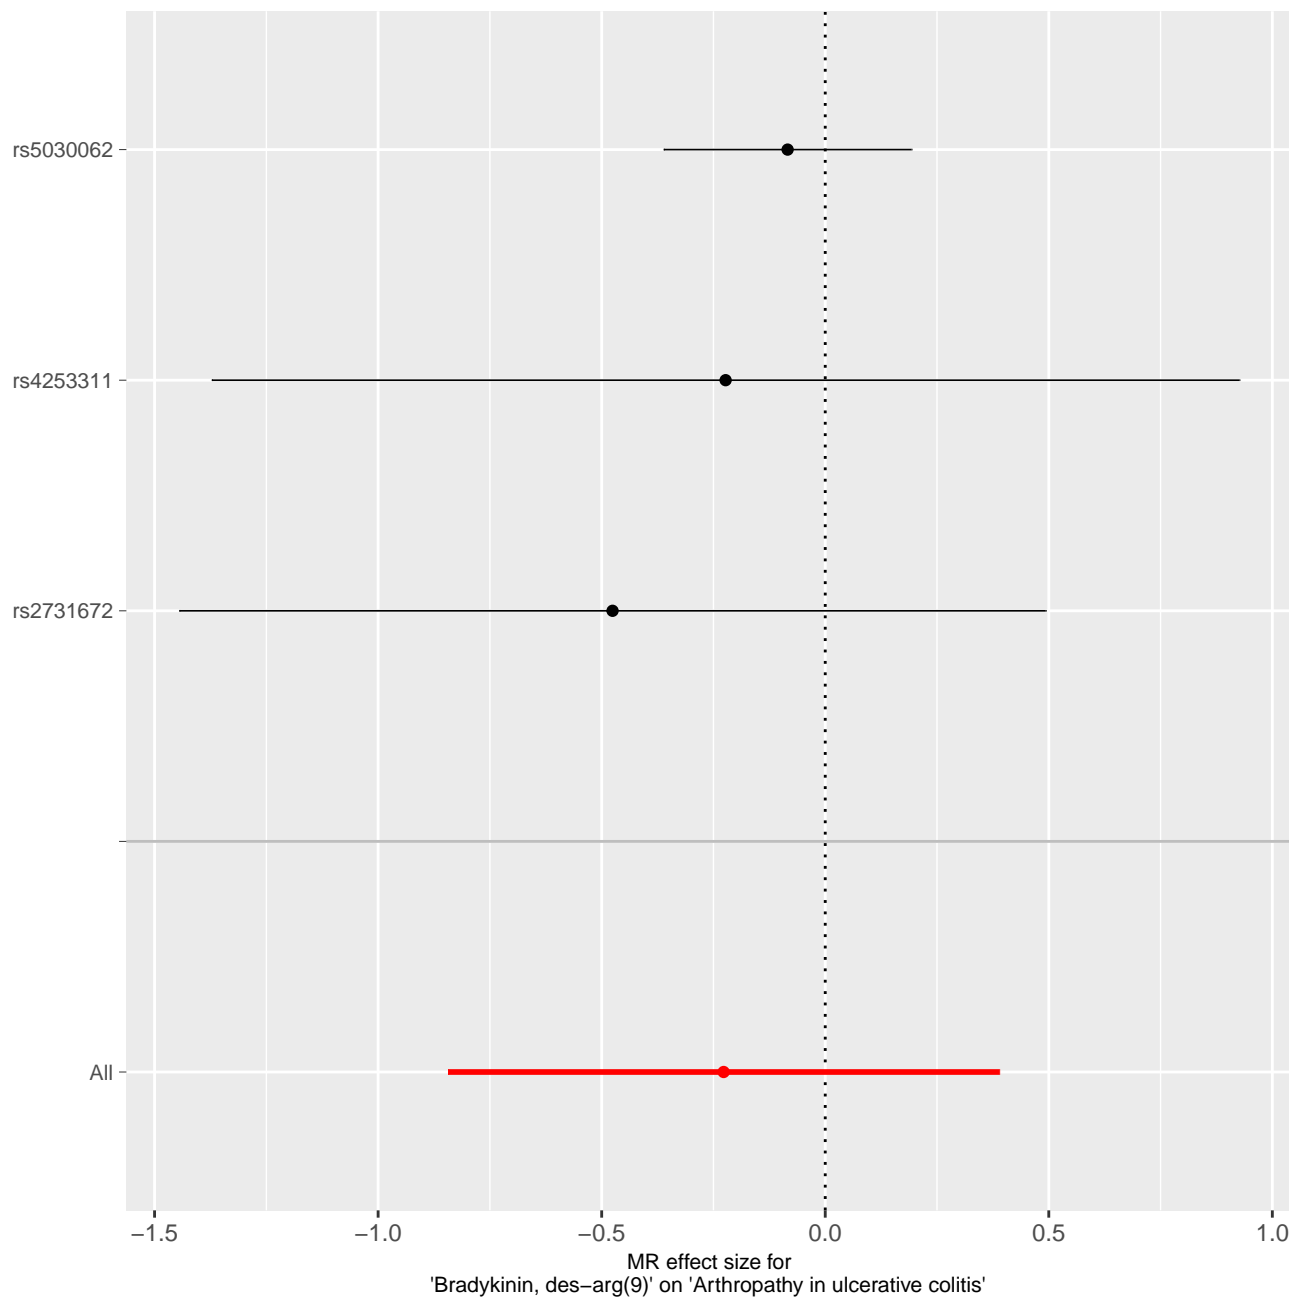

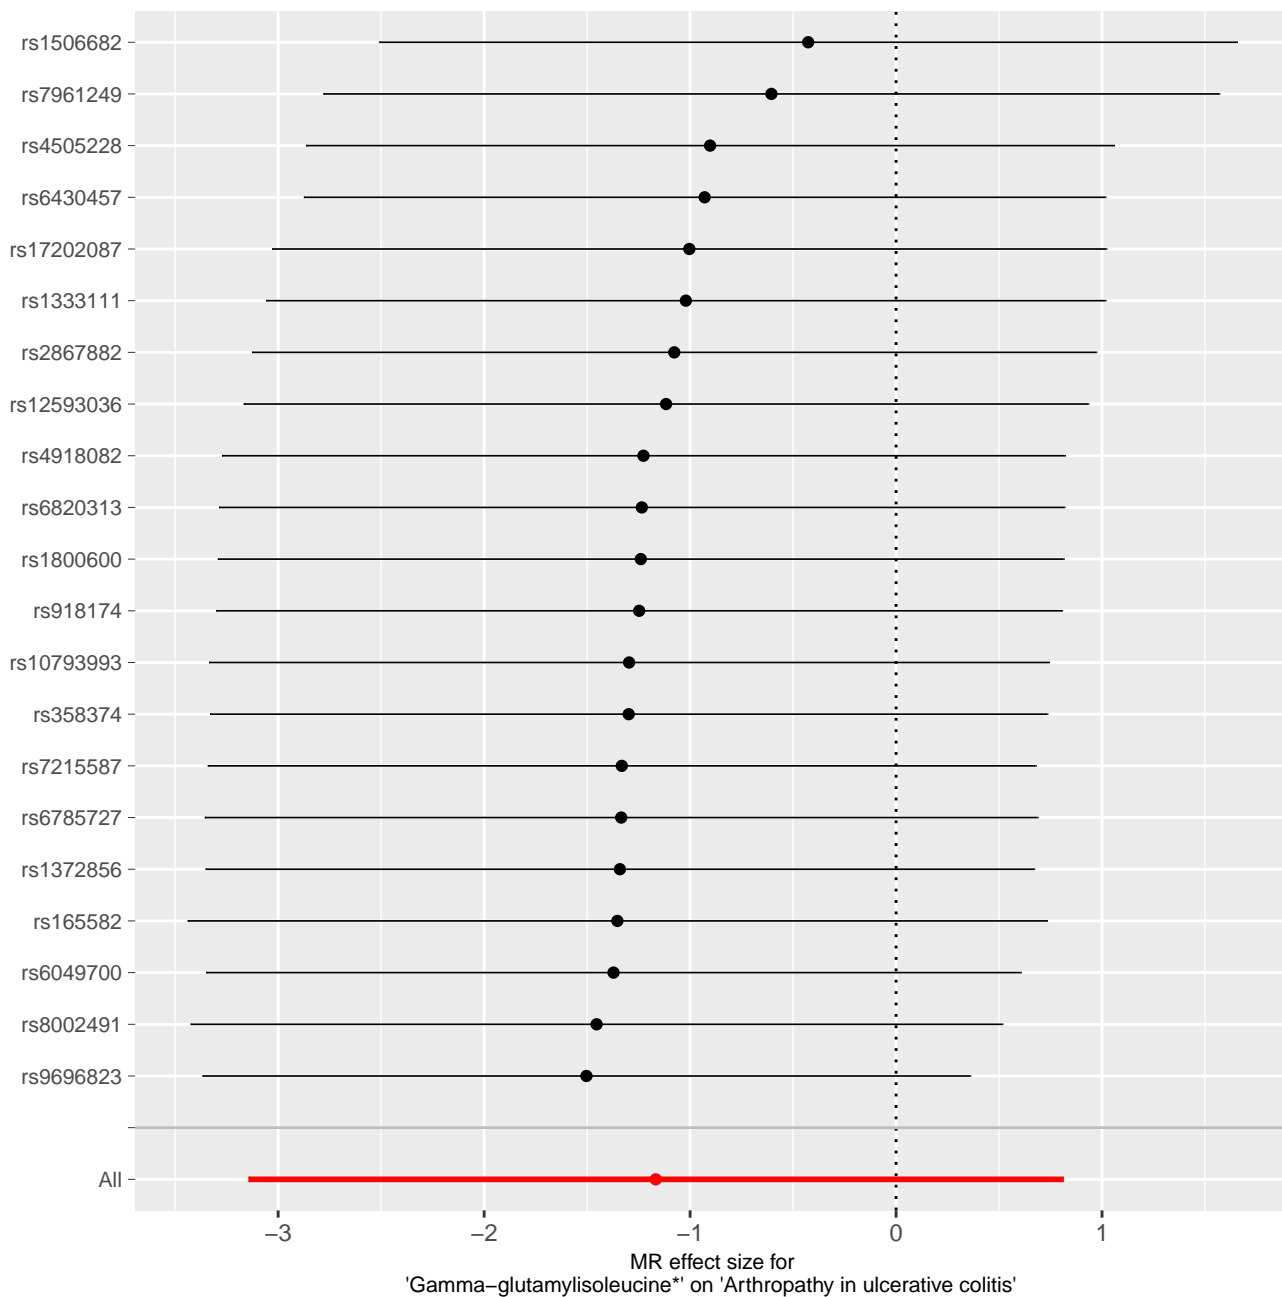

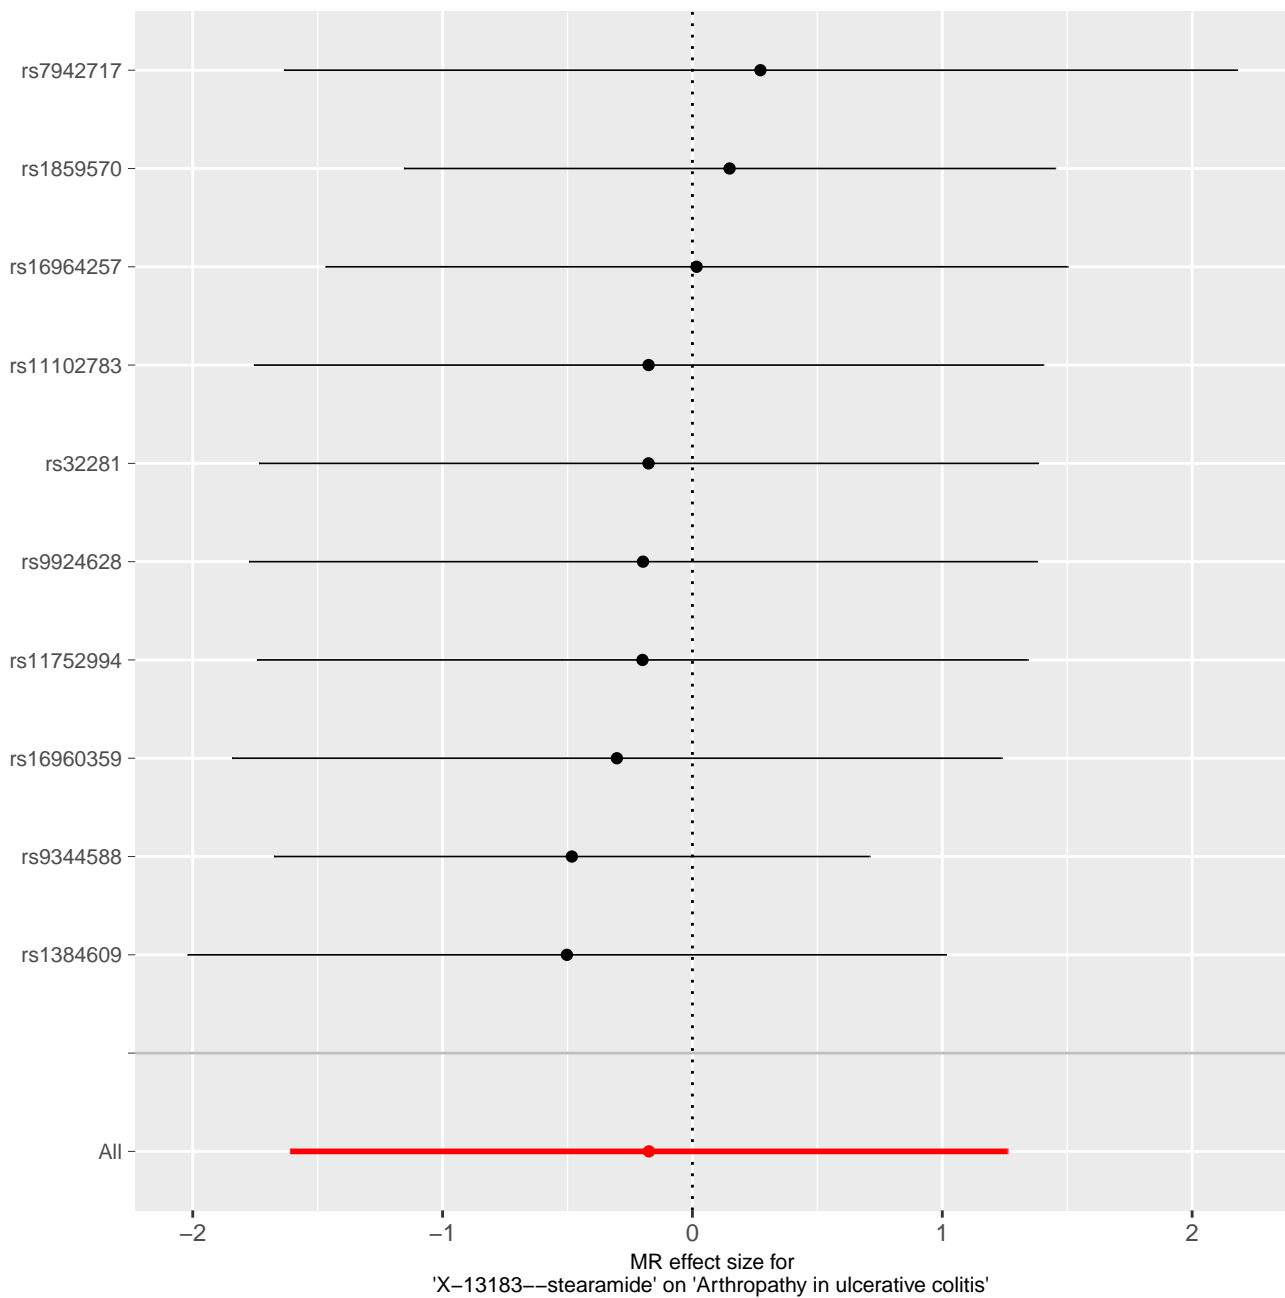



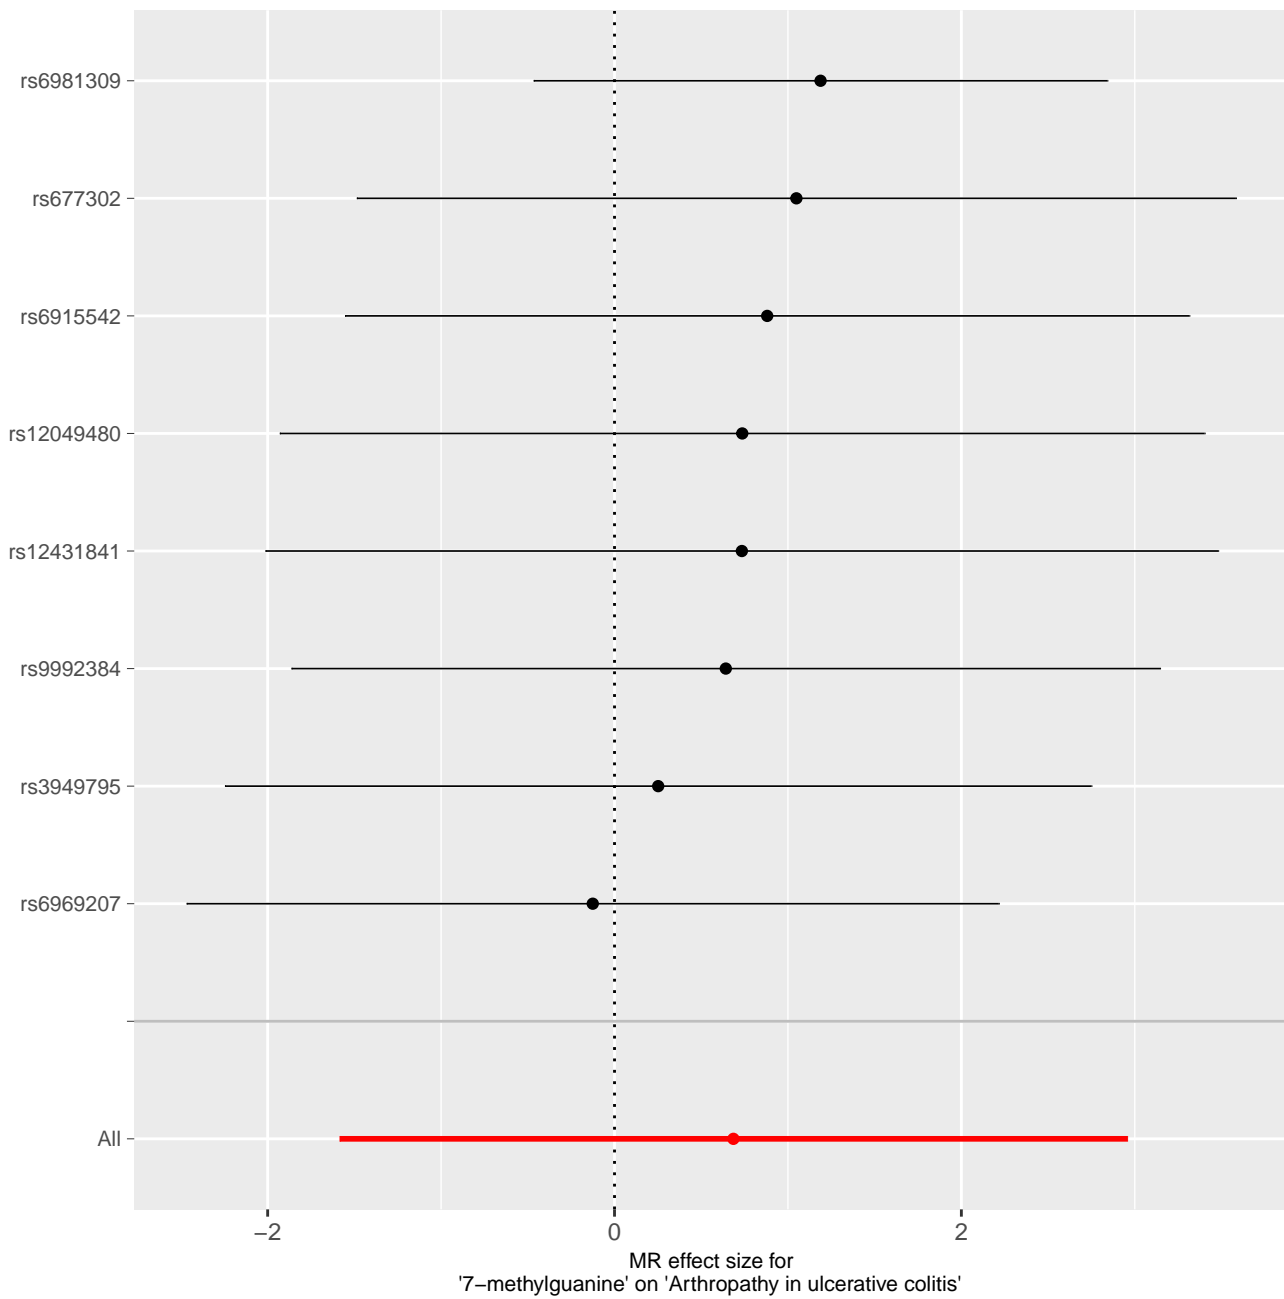

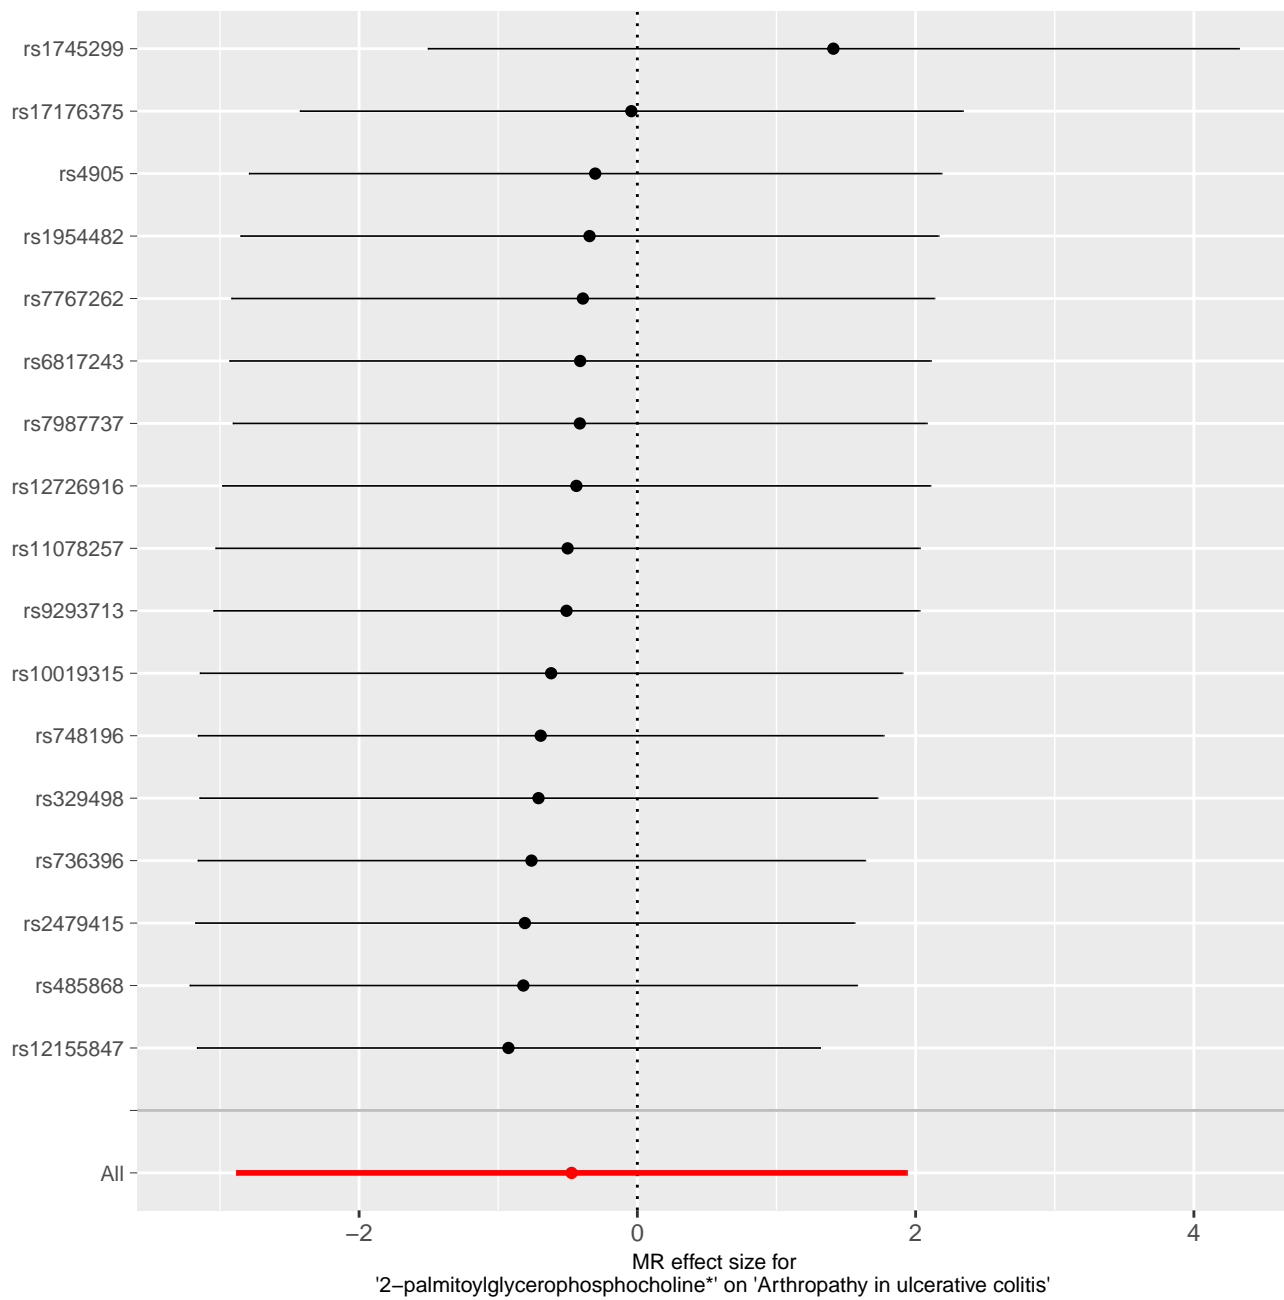

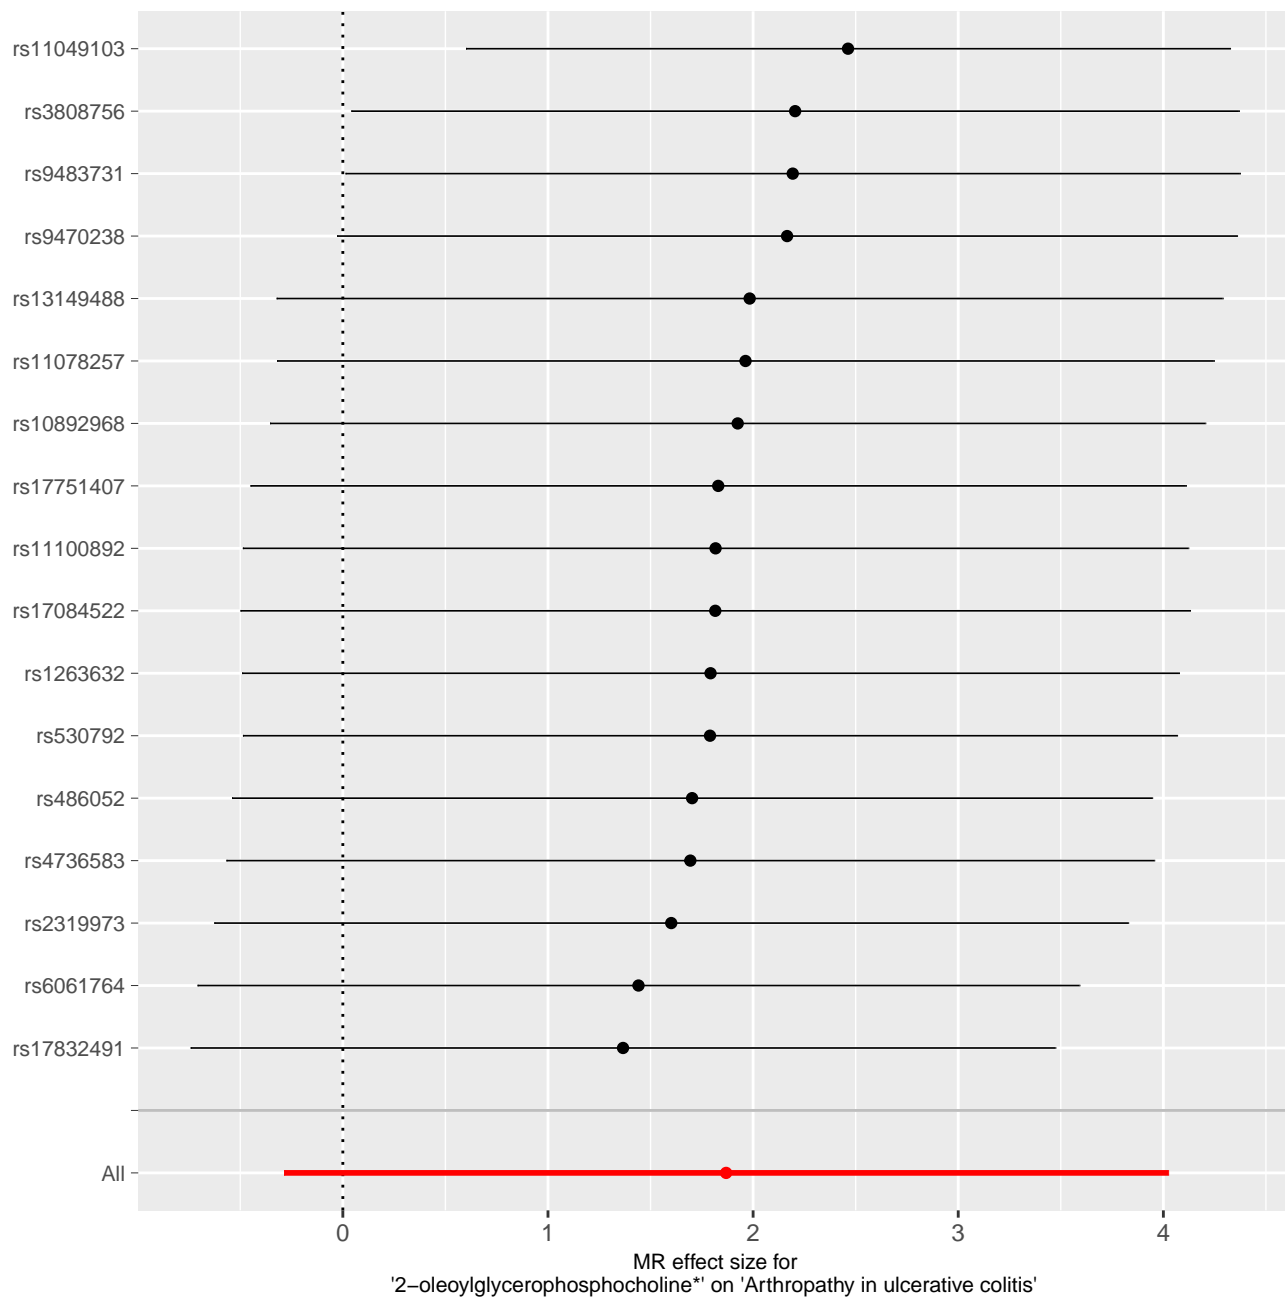

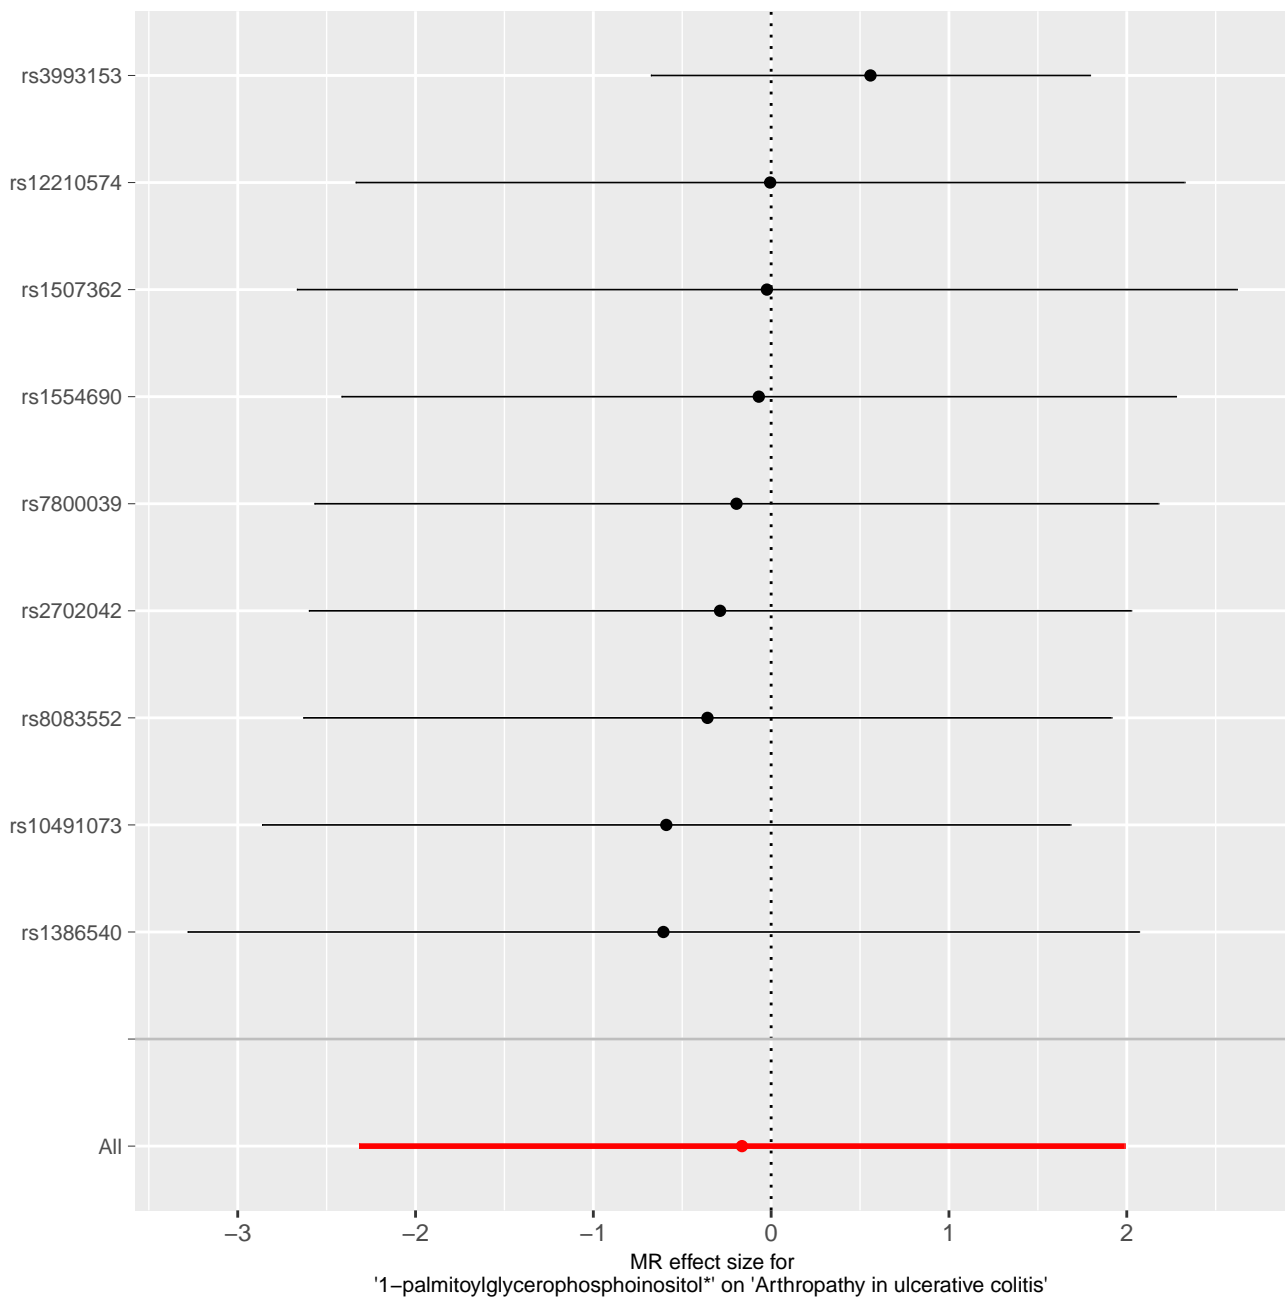

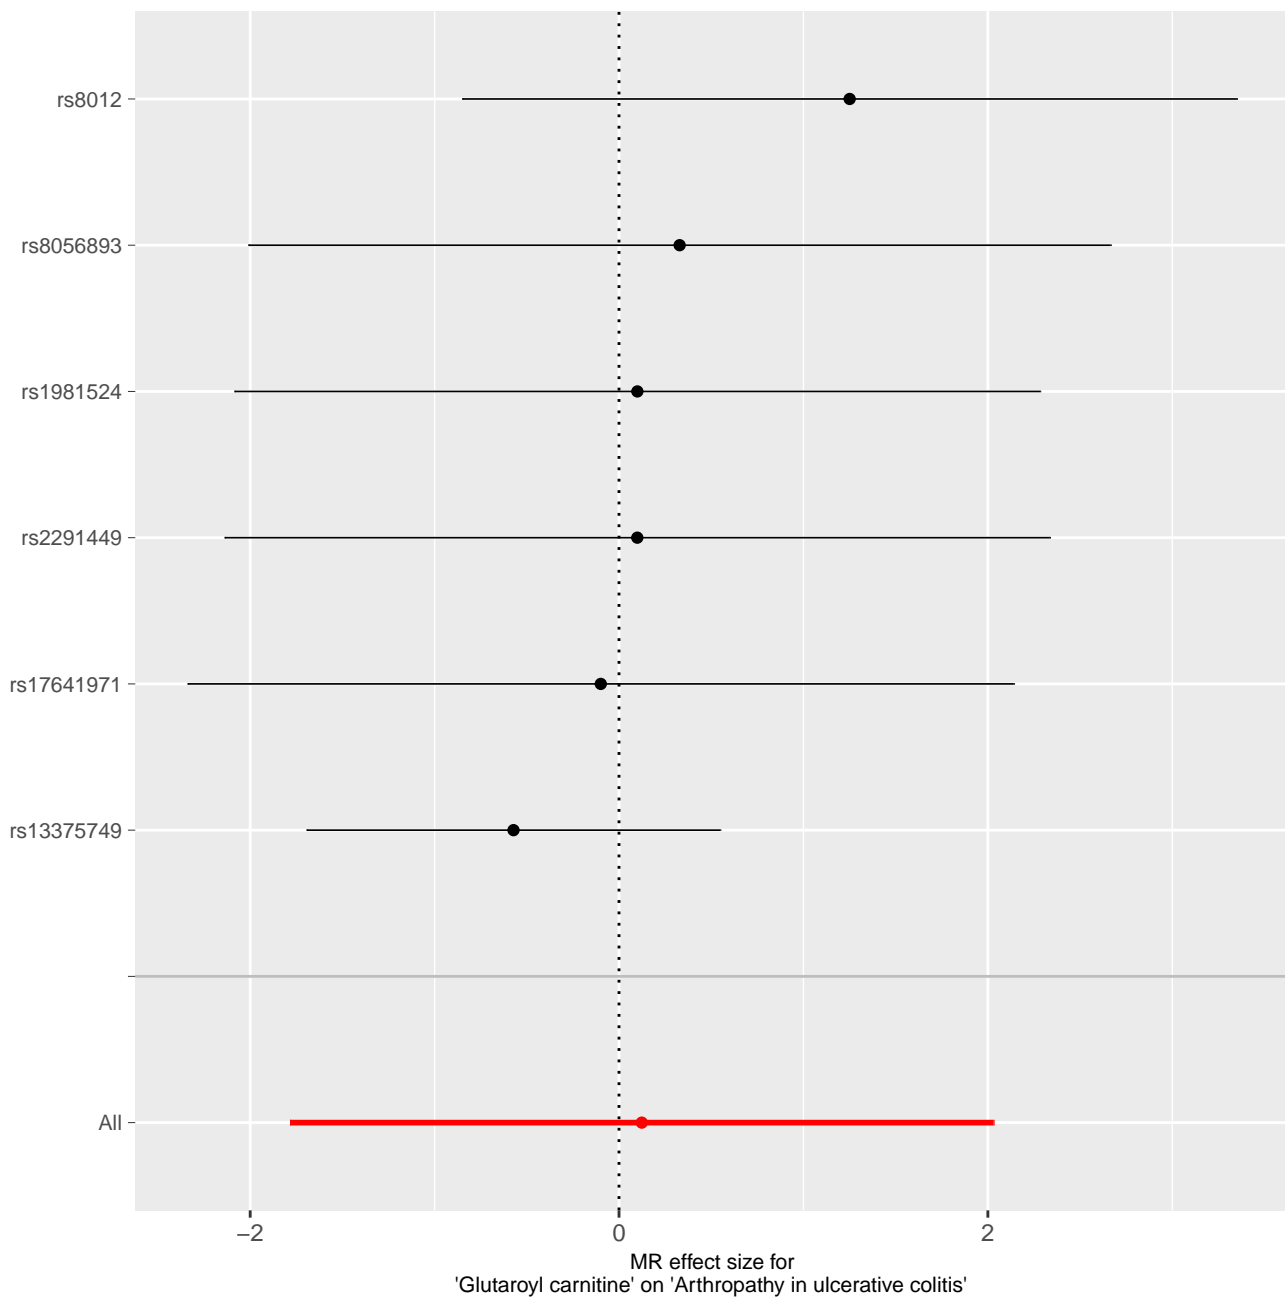

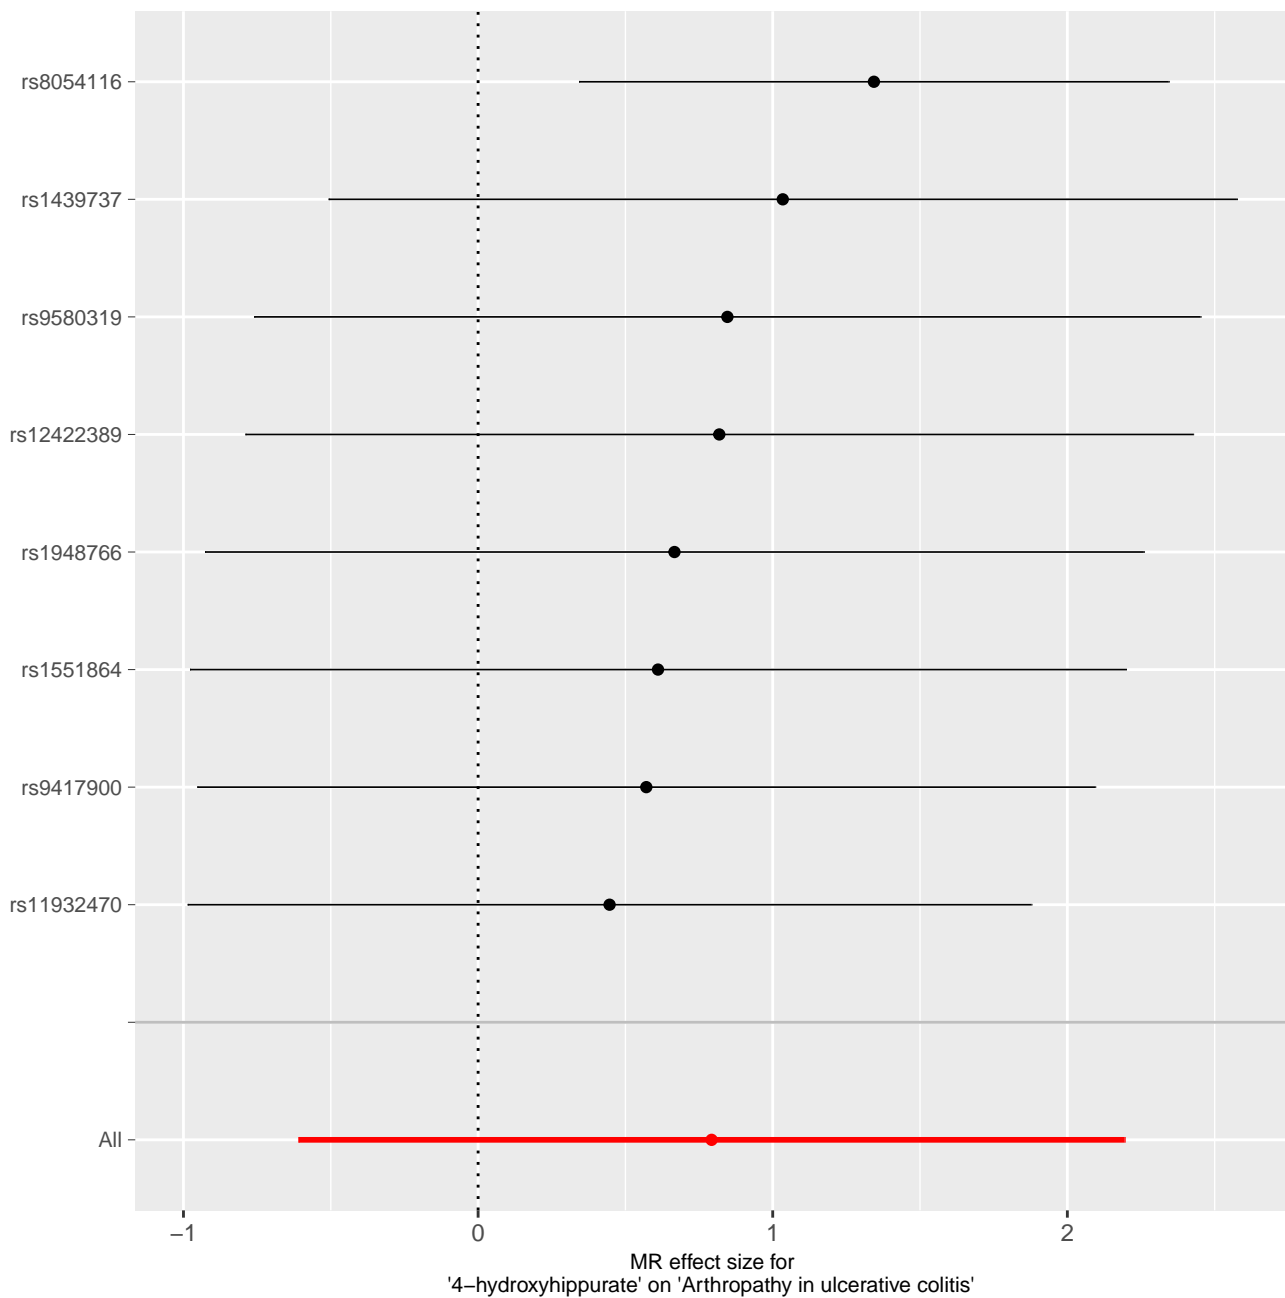

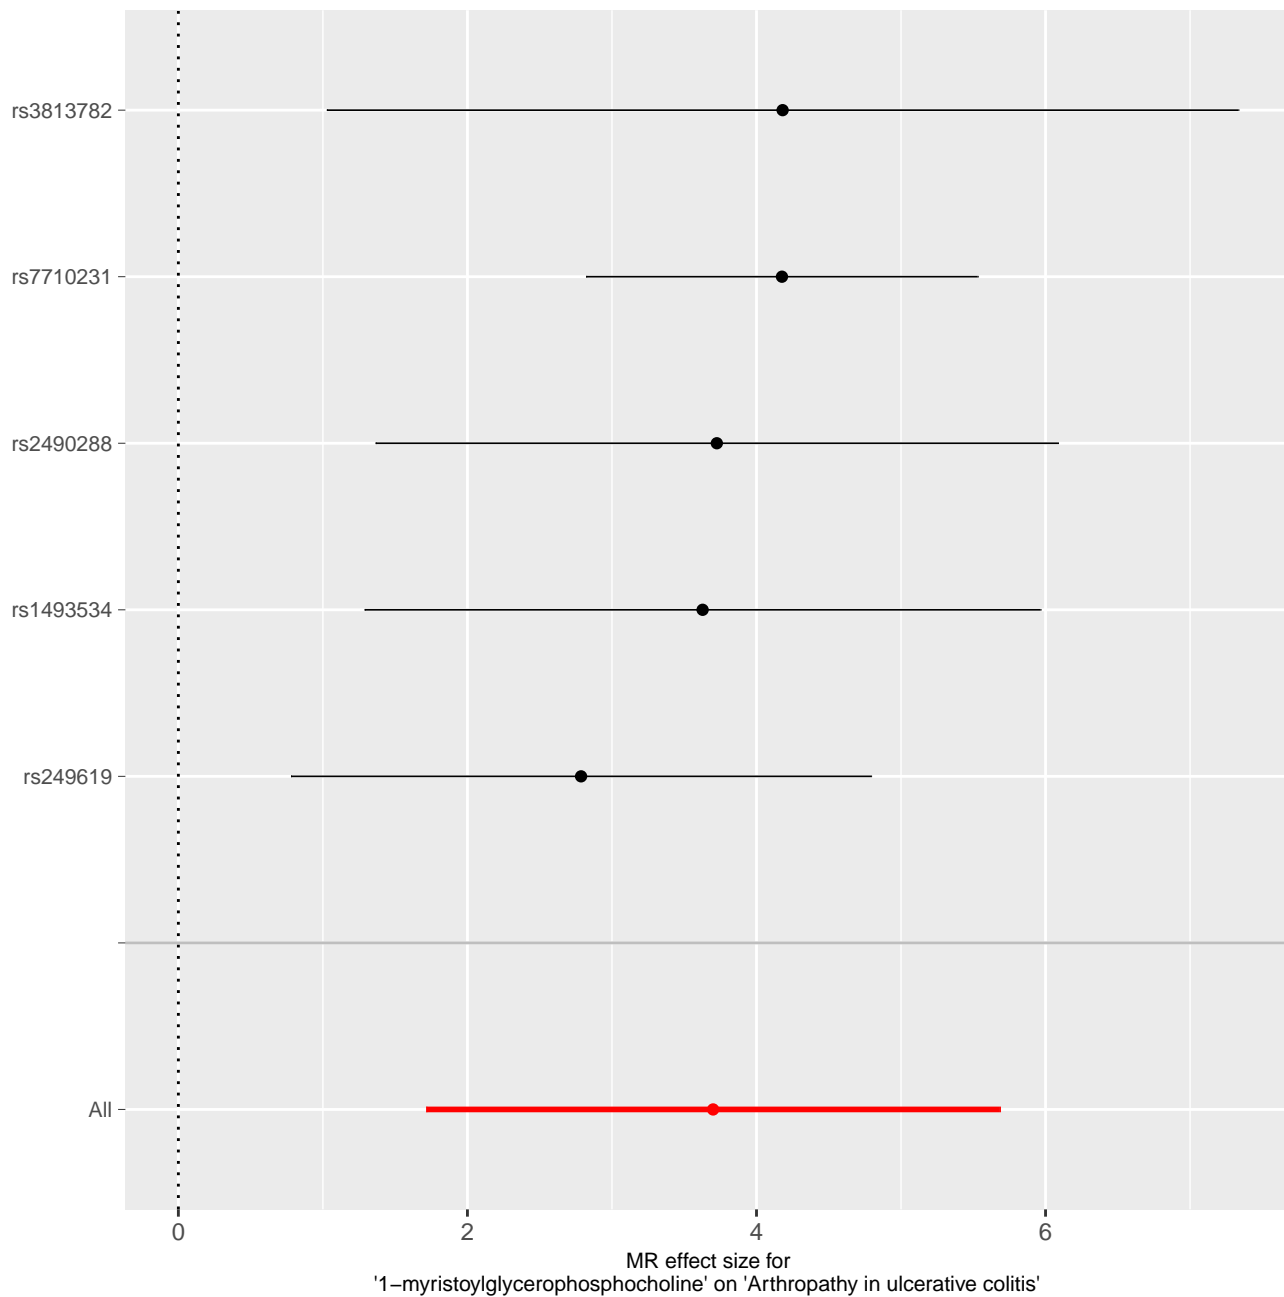

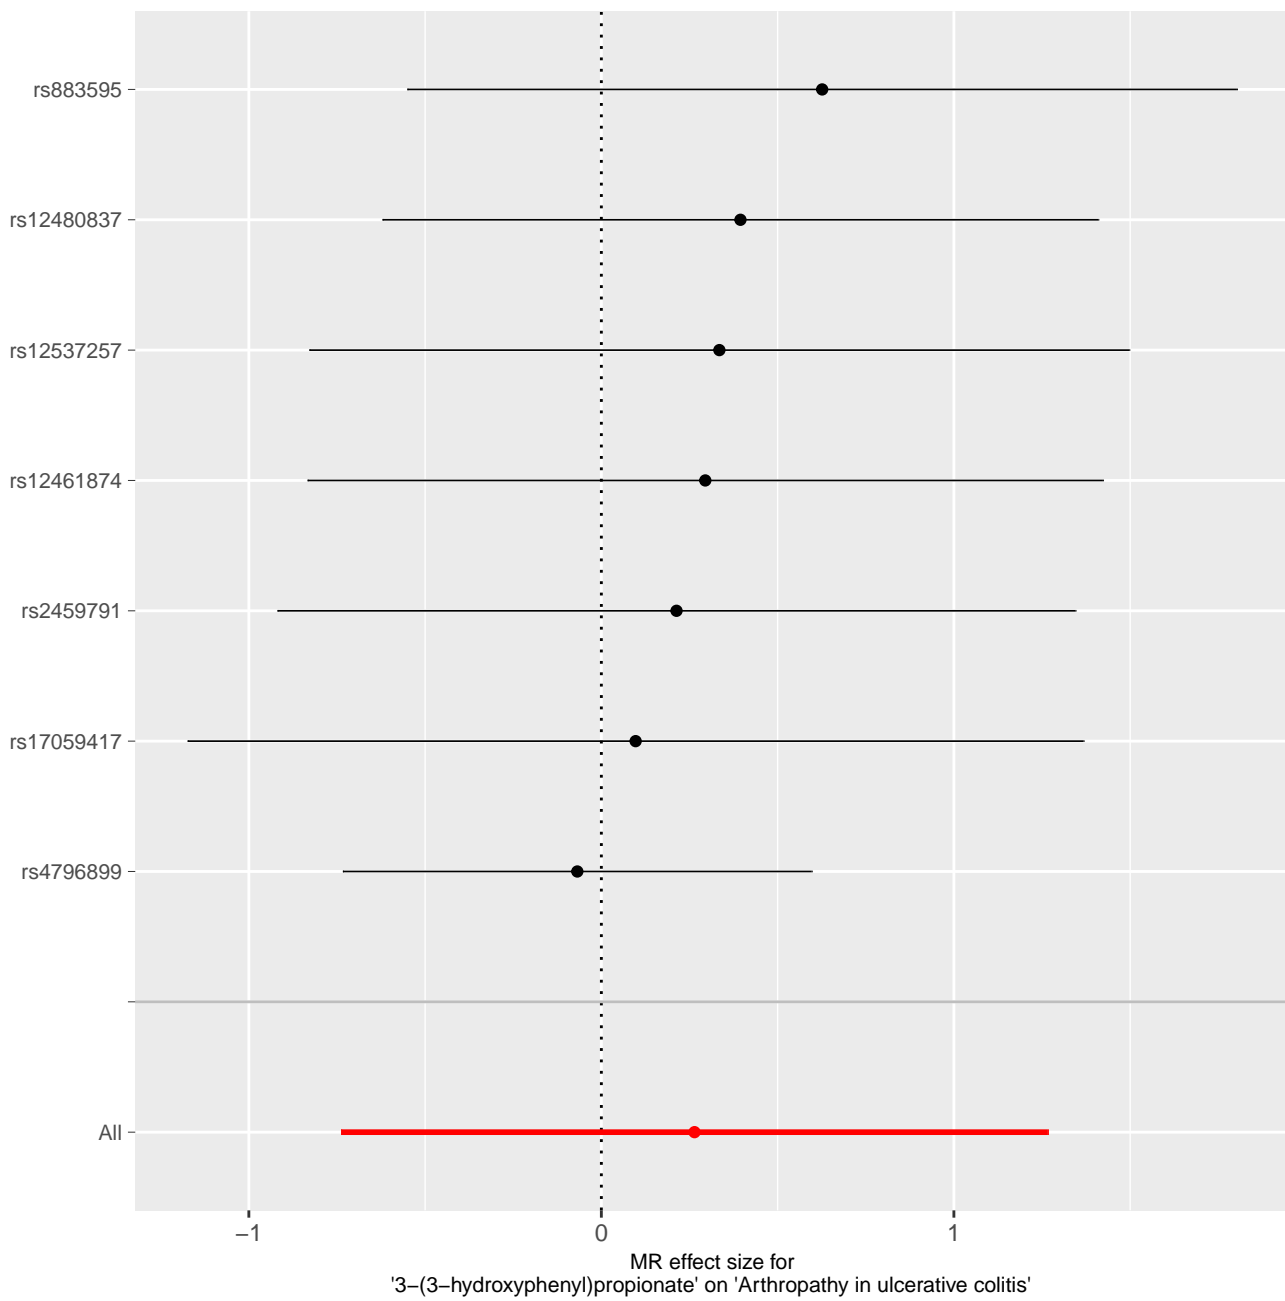



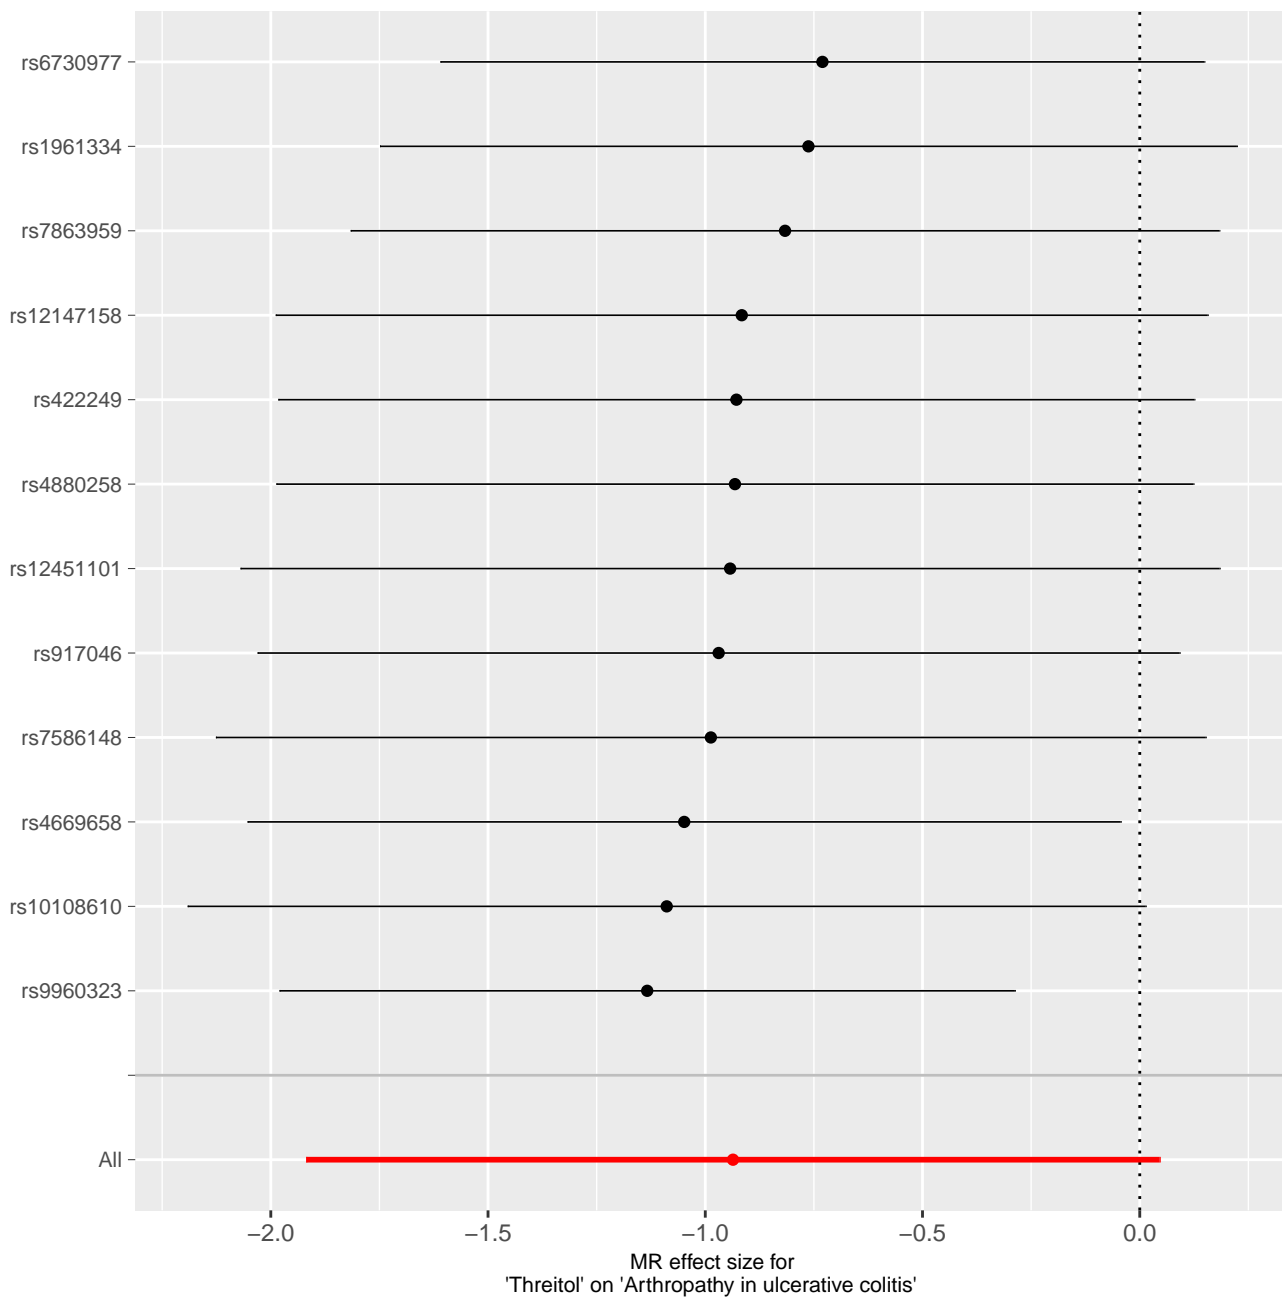

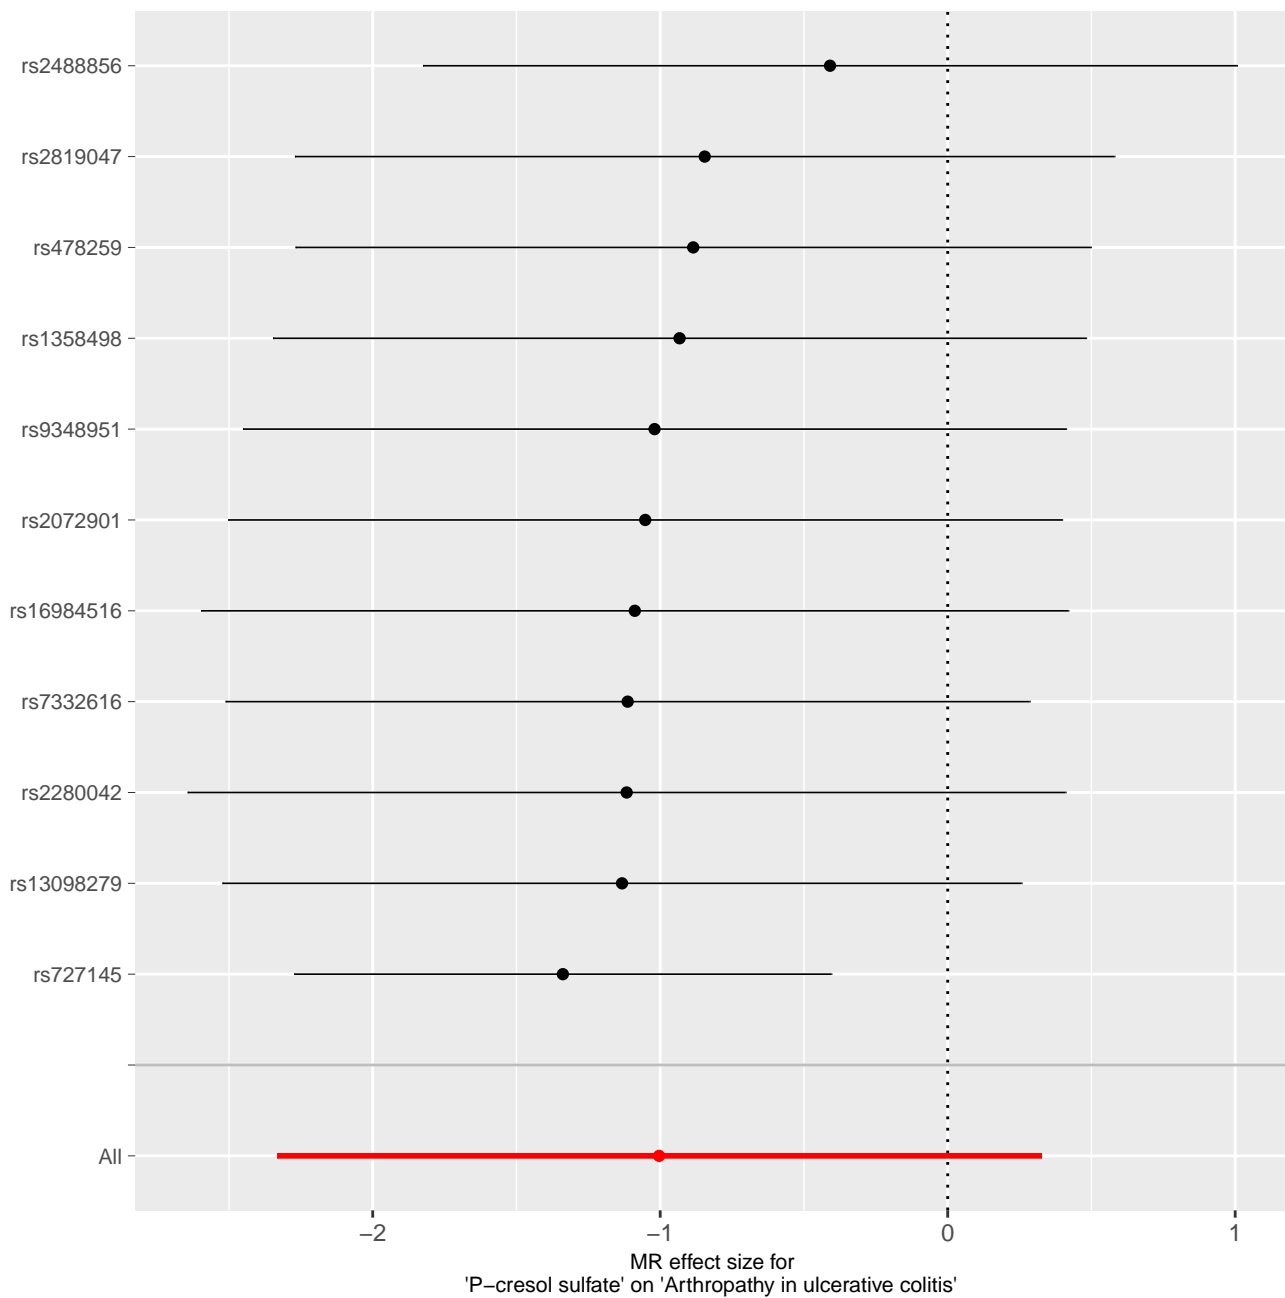

rs1893285

rs7021014

rs1192458

rs2874702

All

MR effect size for  
'X-14450--phenylalanylleucine' on 'Arthropathy in ulcerative colitis'

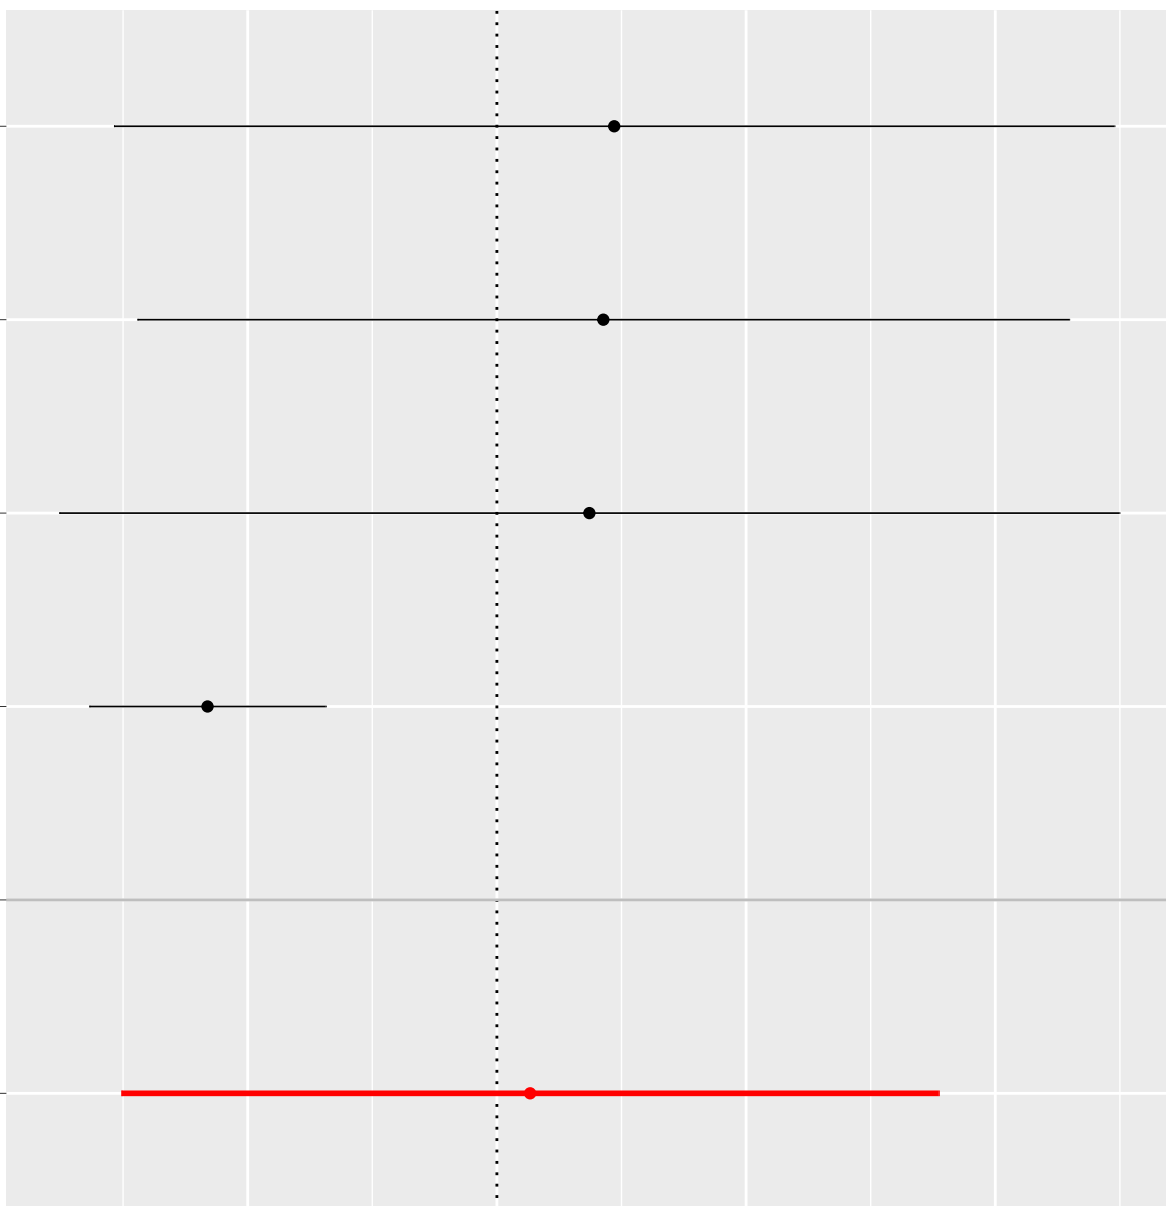

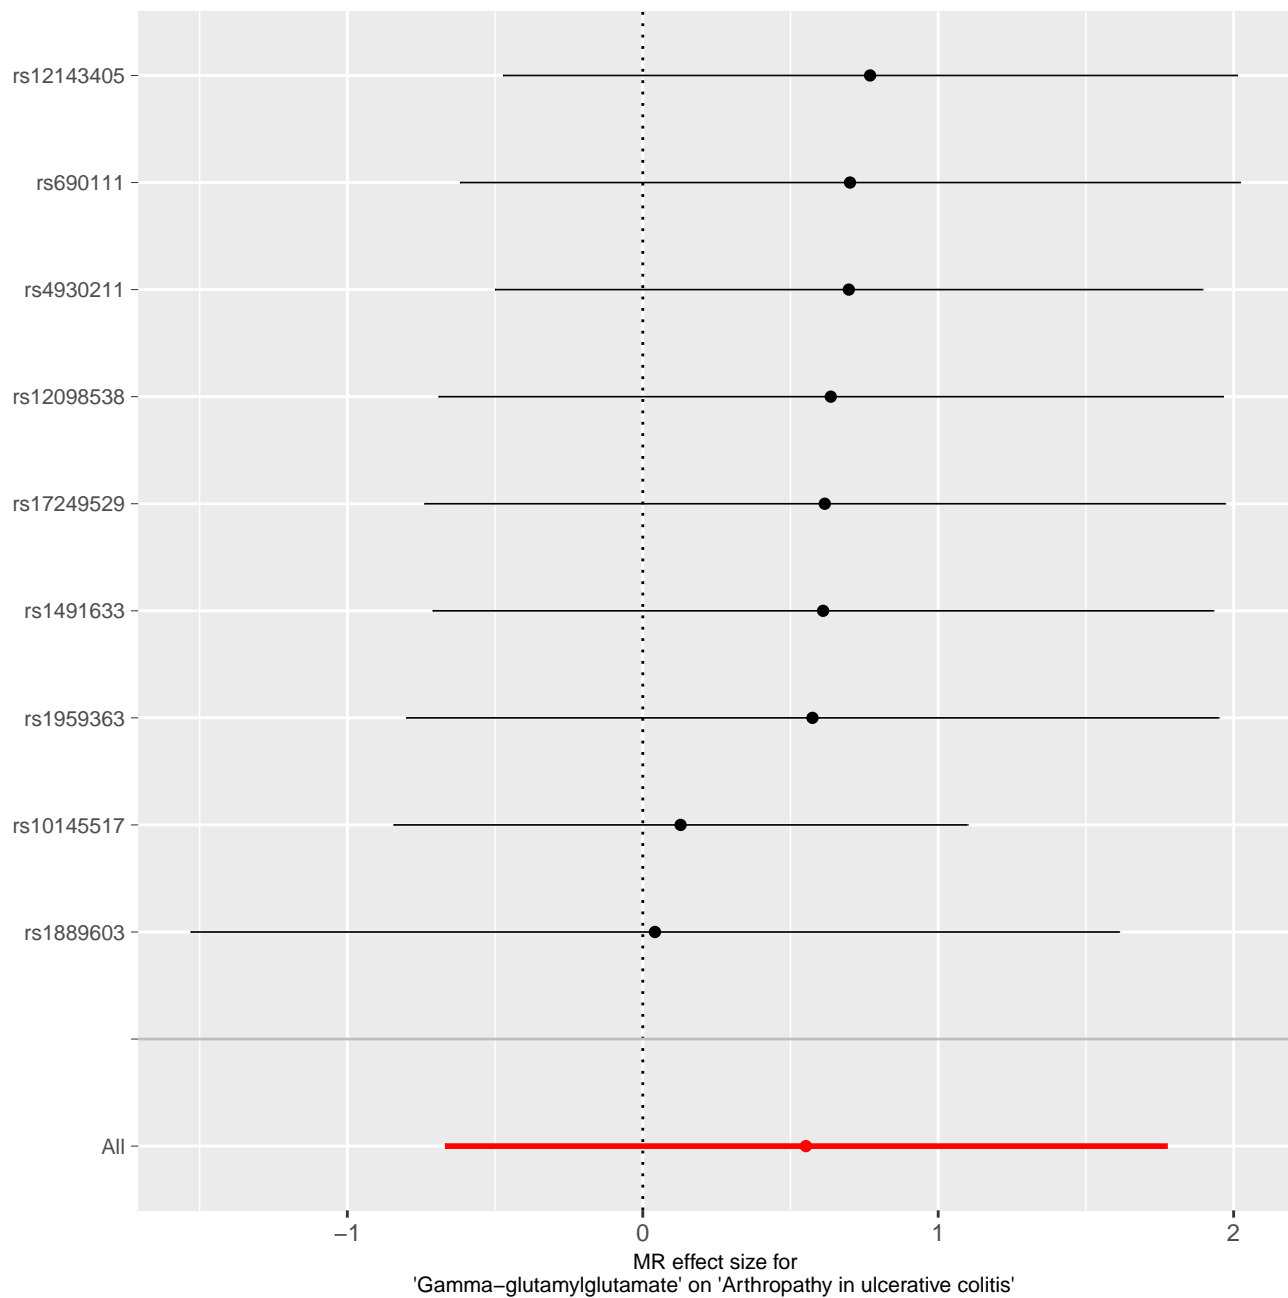

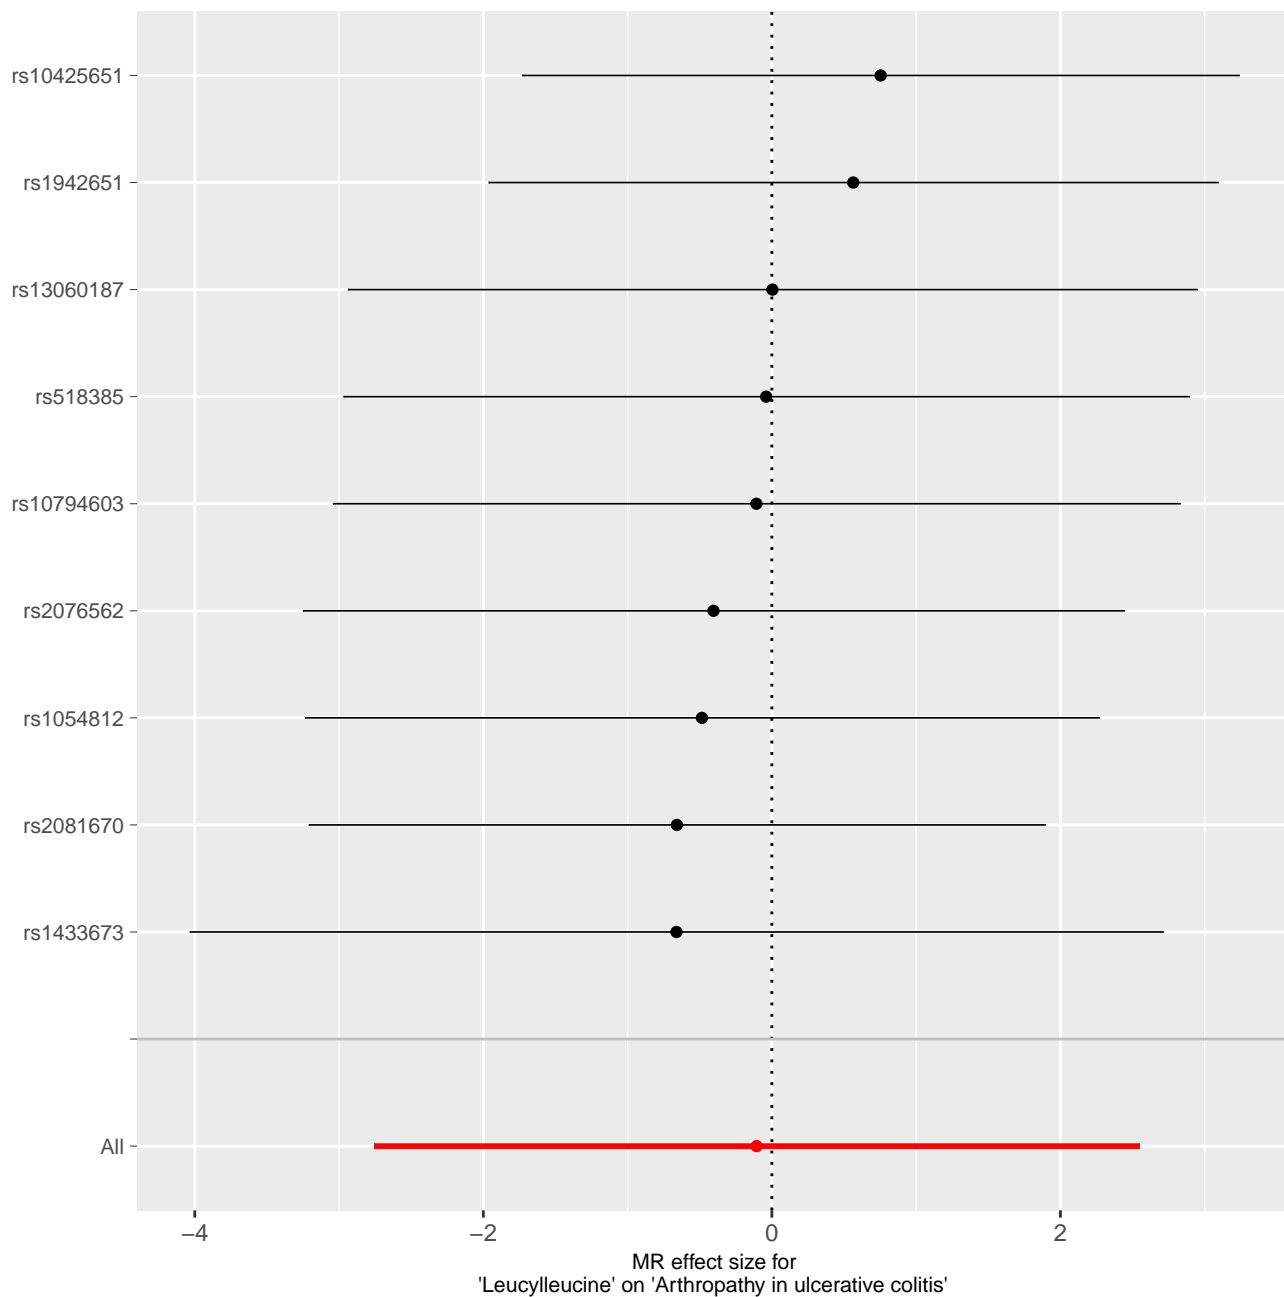

Batch 1908 : 7- $\alpha$ -hydroxy-3-oxo-4-cholestenolate (7-Hoca) on Arthropathy in ulcerative colitis

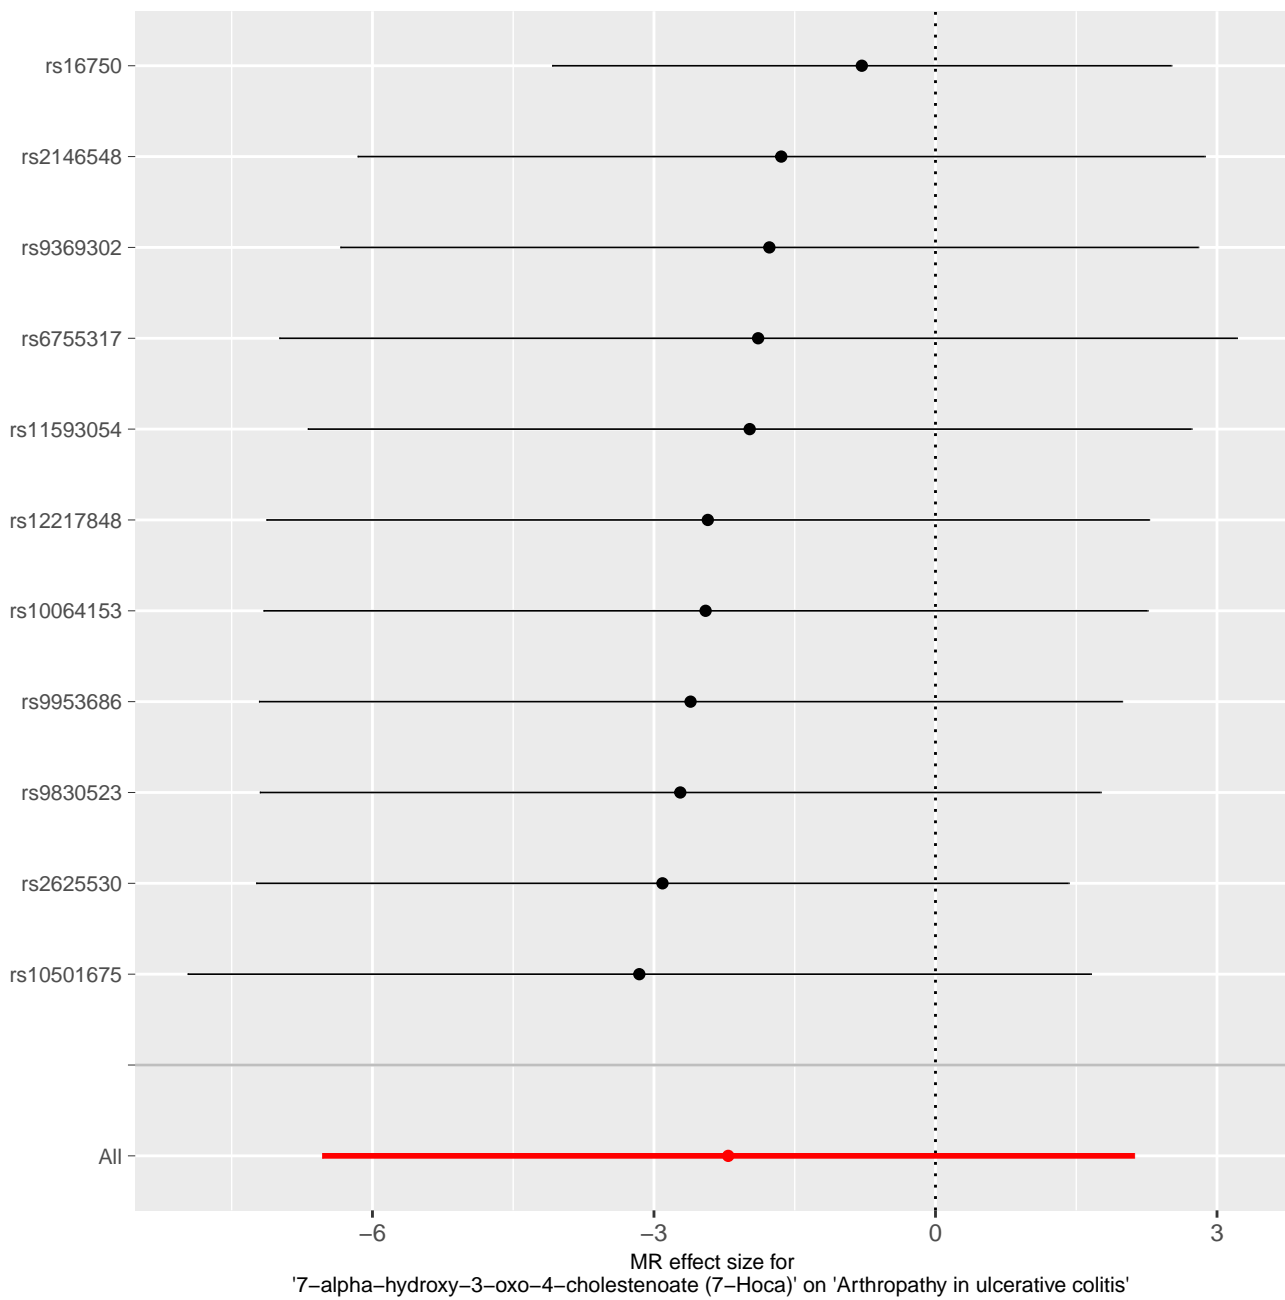

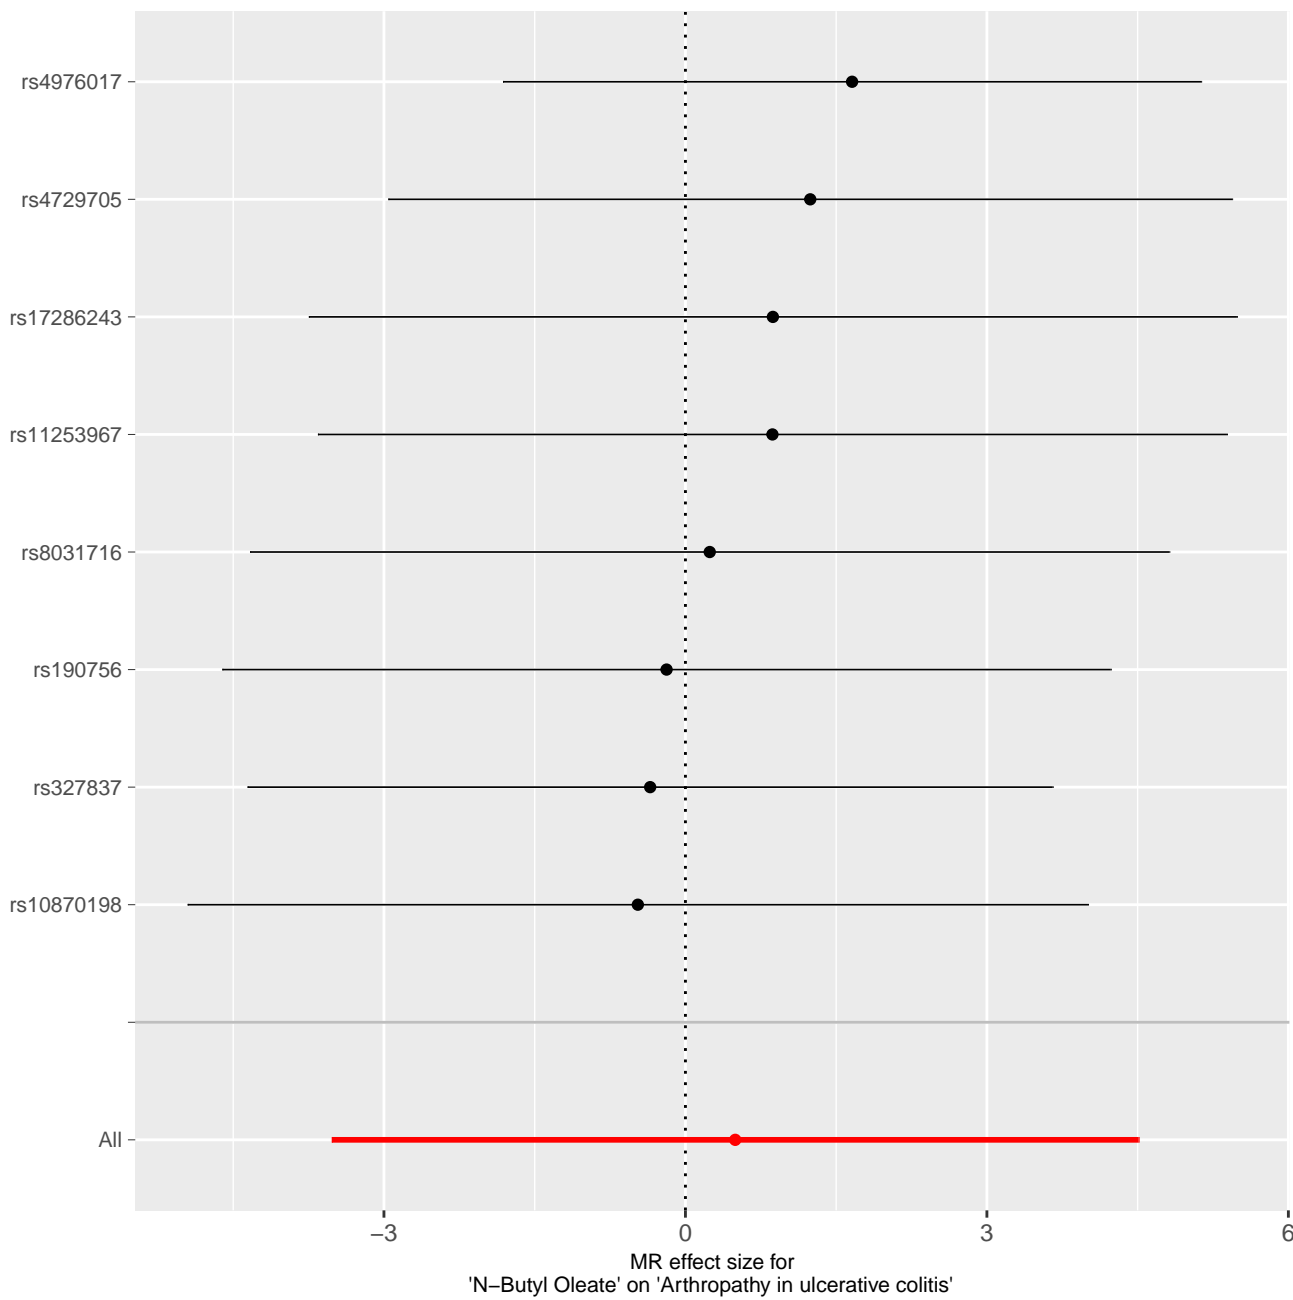

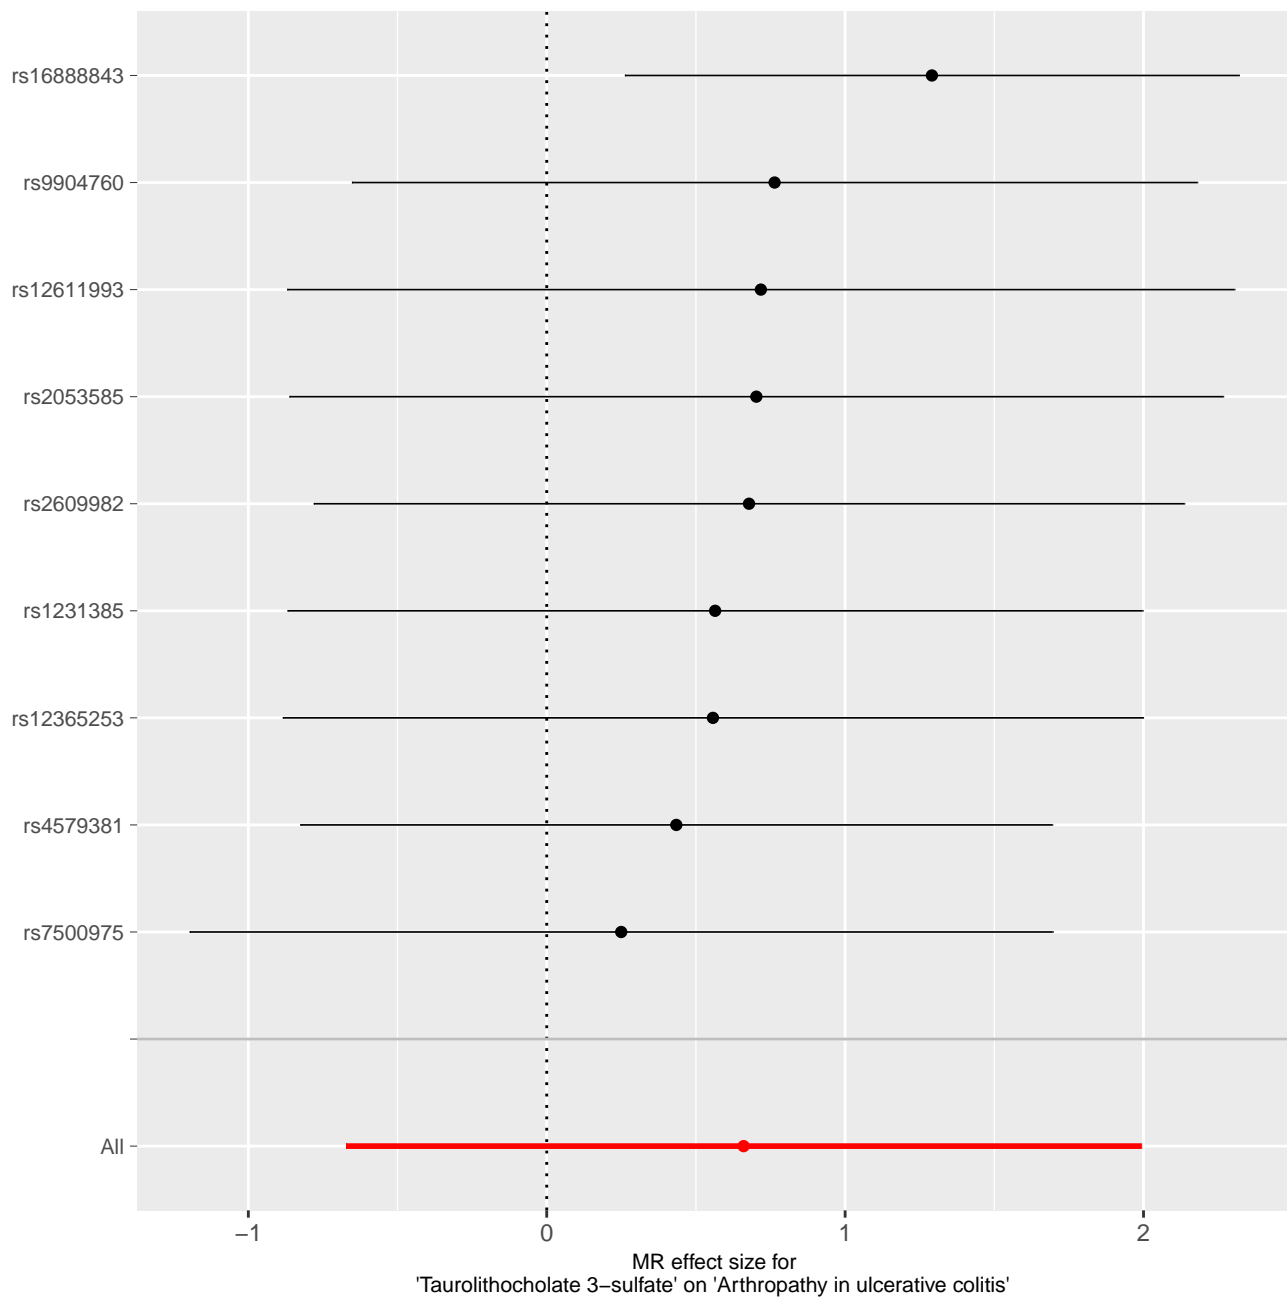



Batch 1912 : X-14977--vanillin on Arthropathy in ulcerative colitis

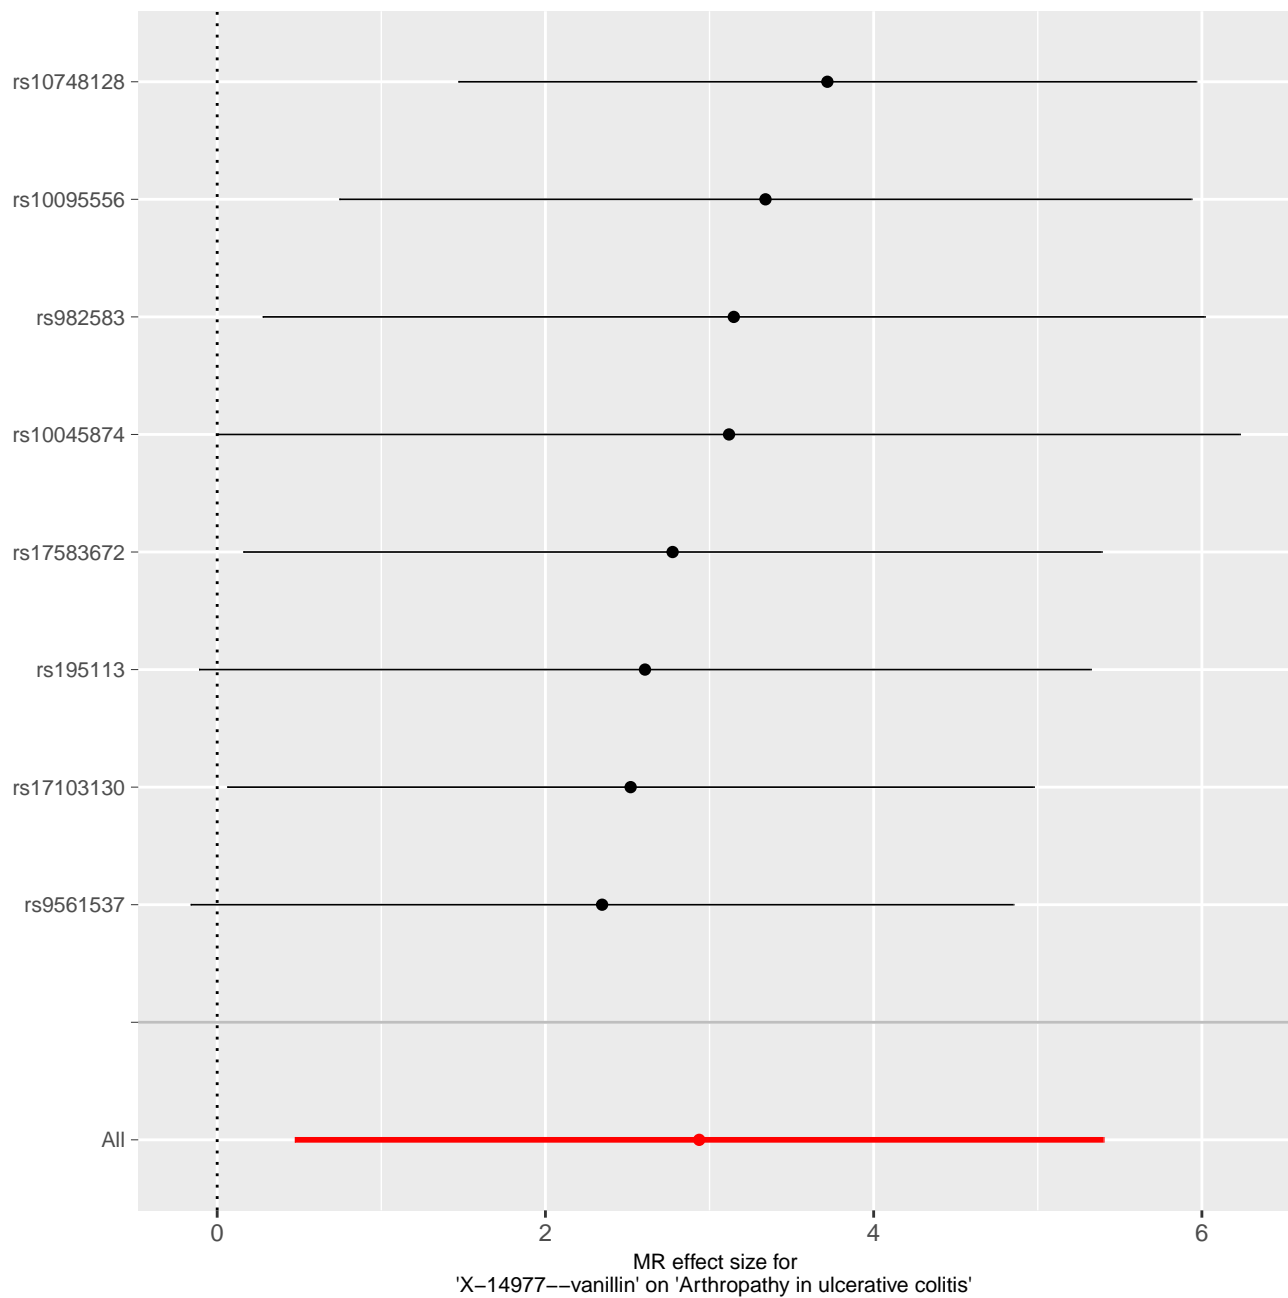

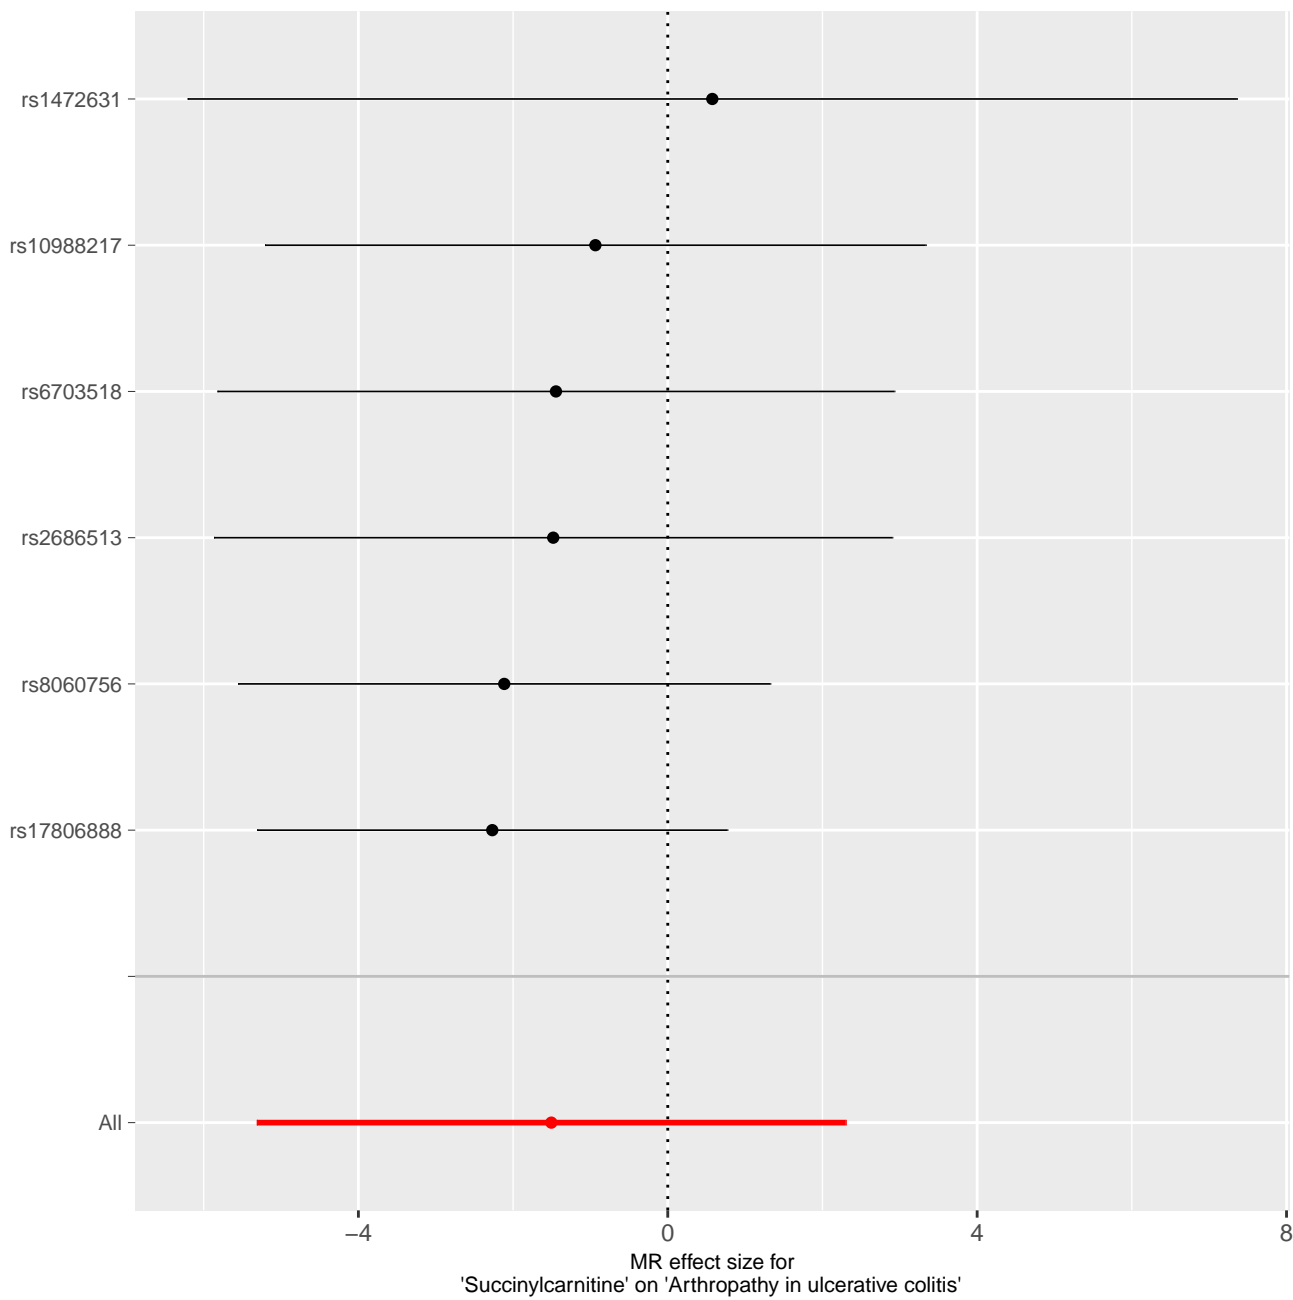

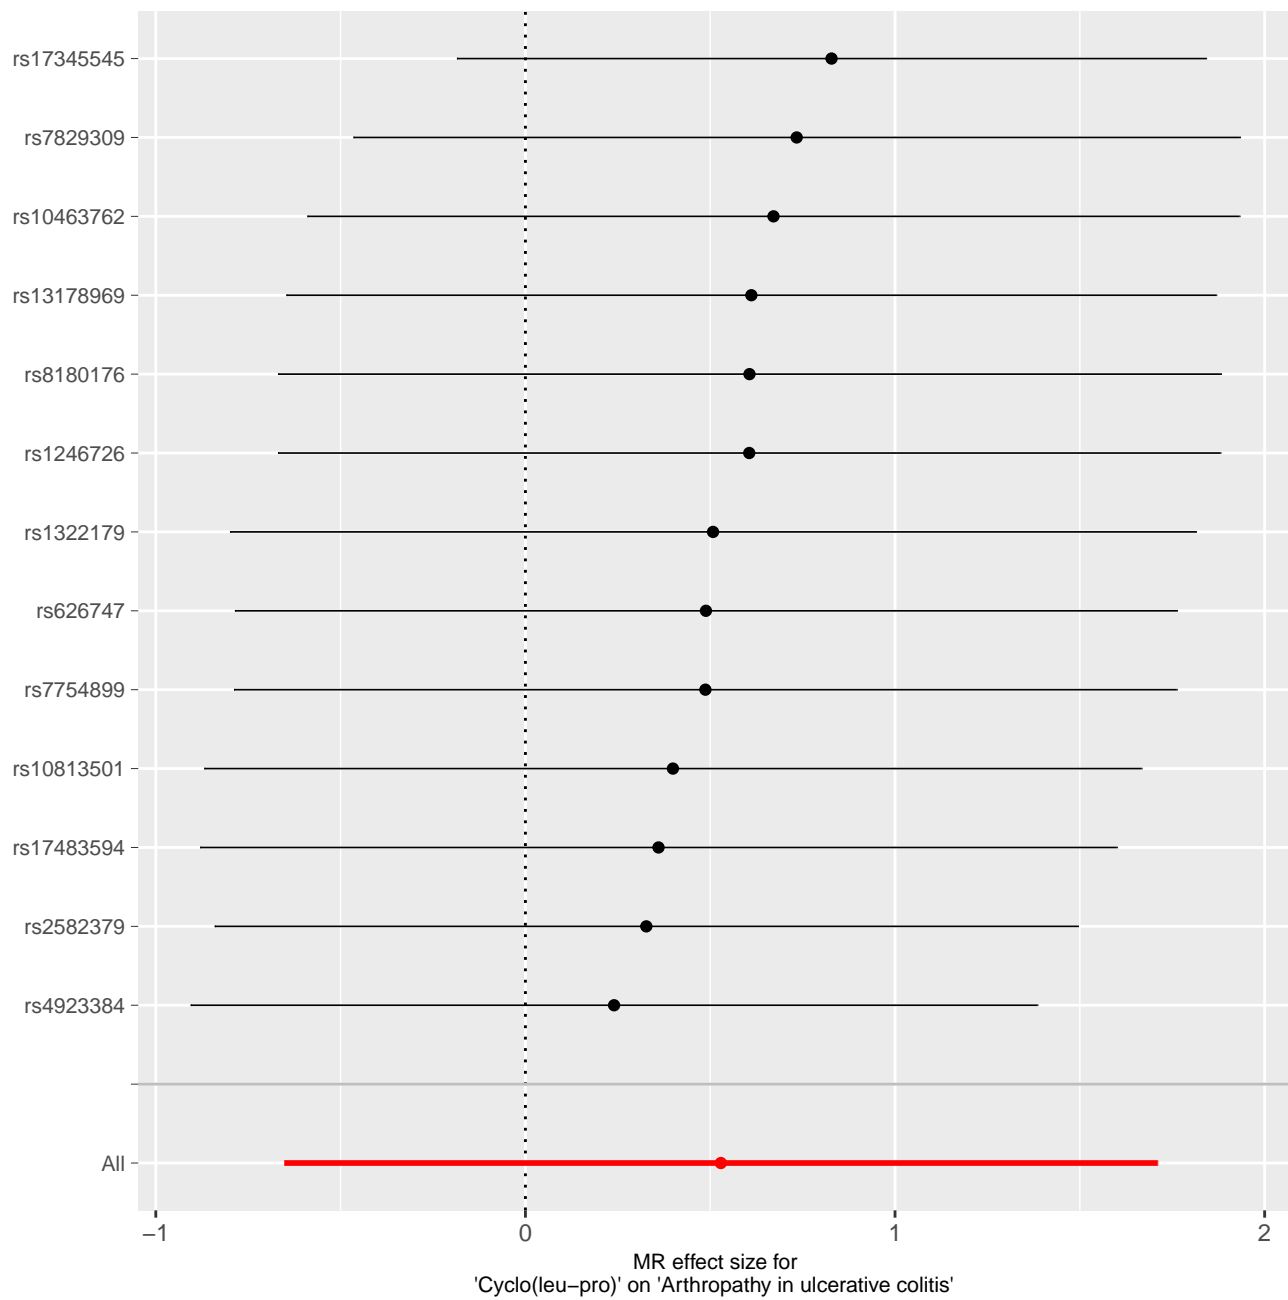

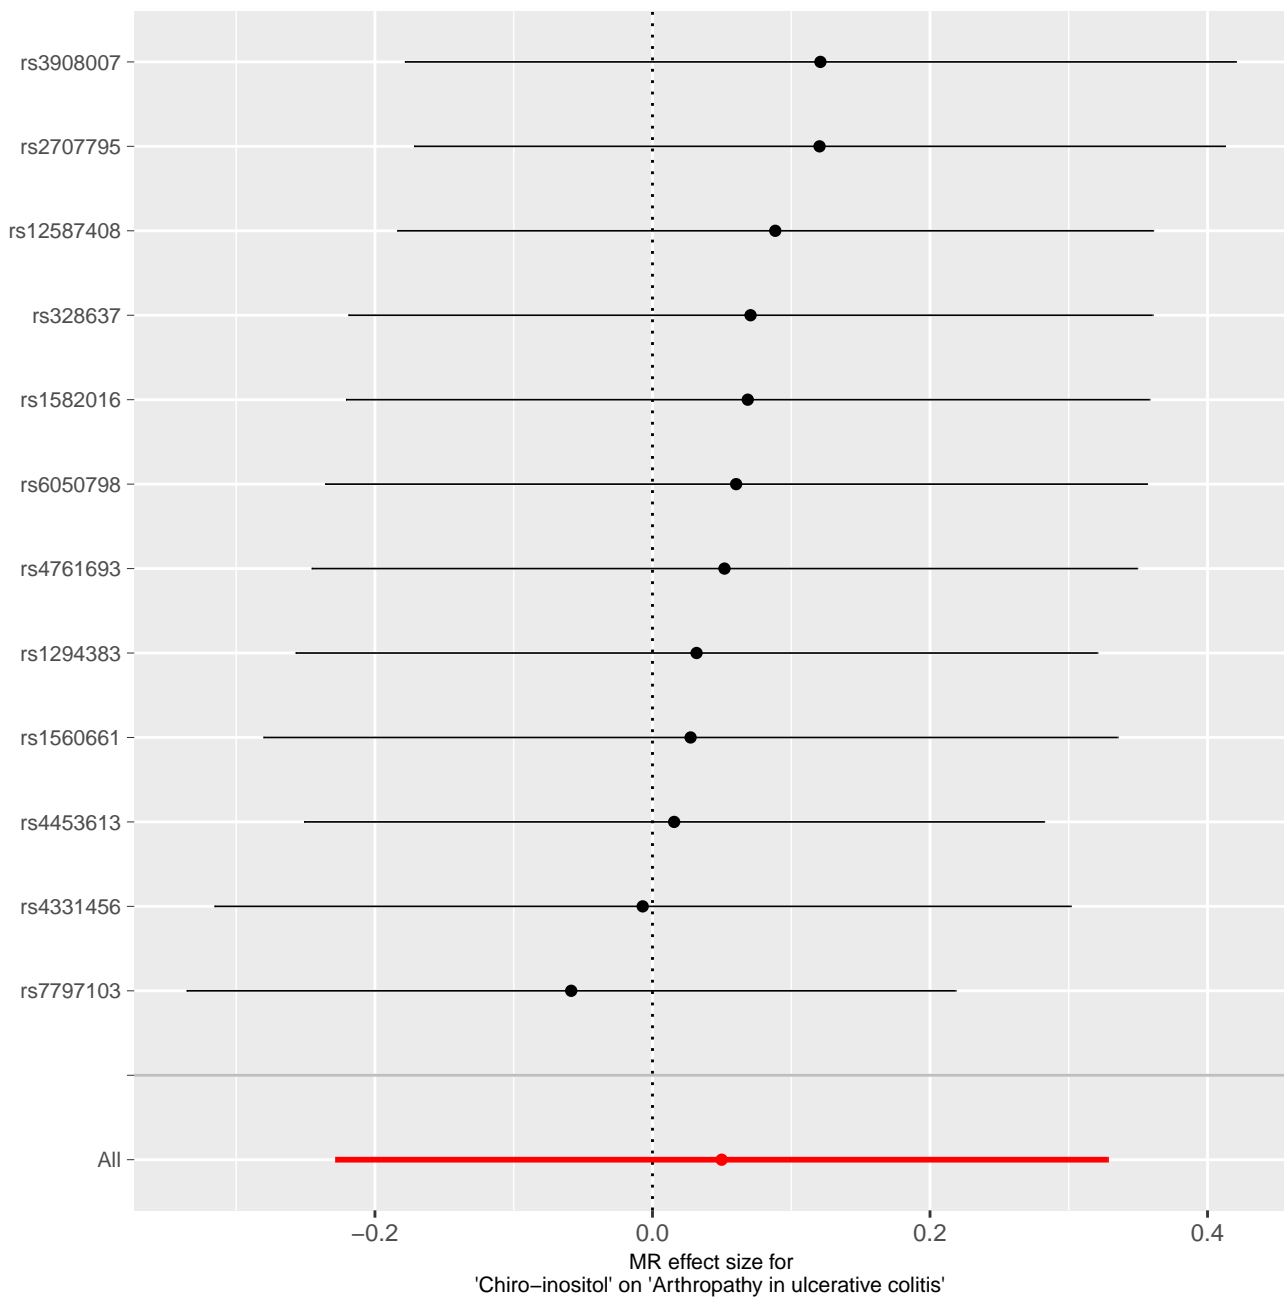

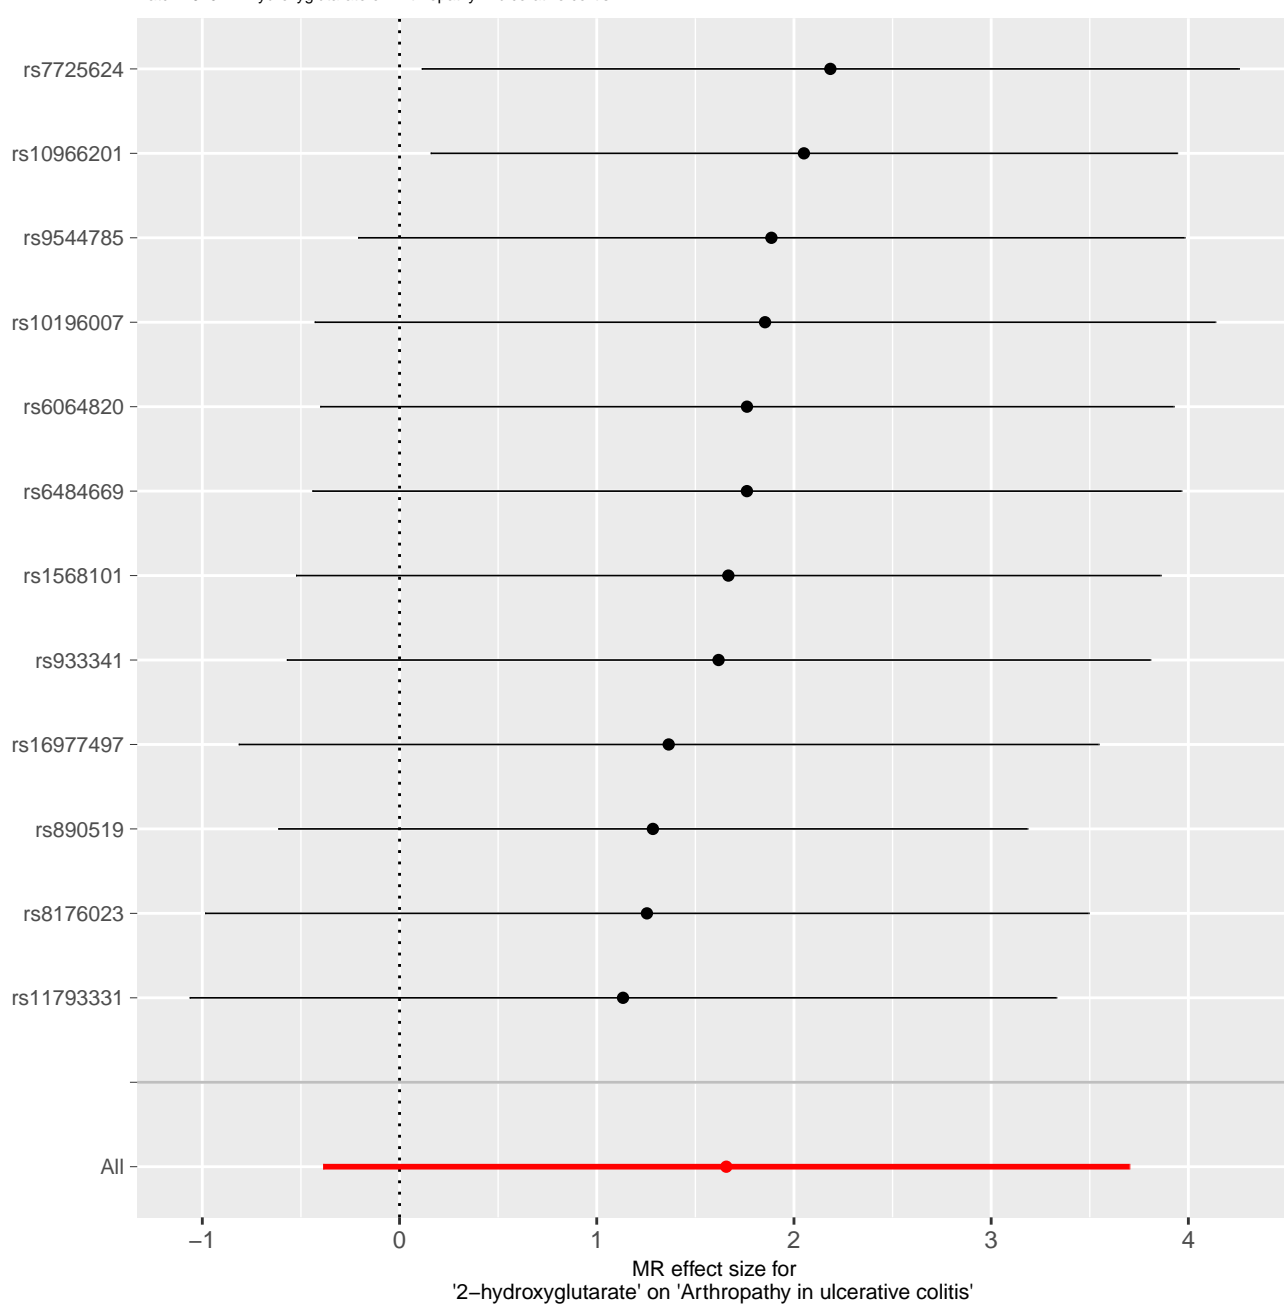

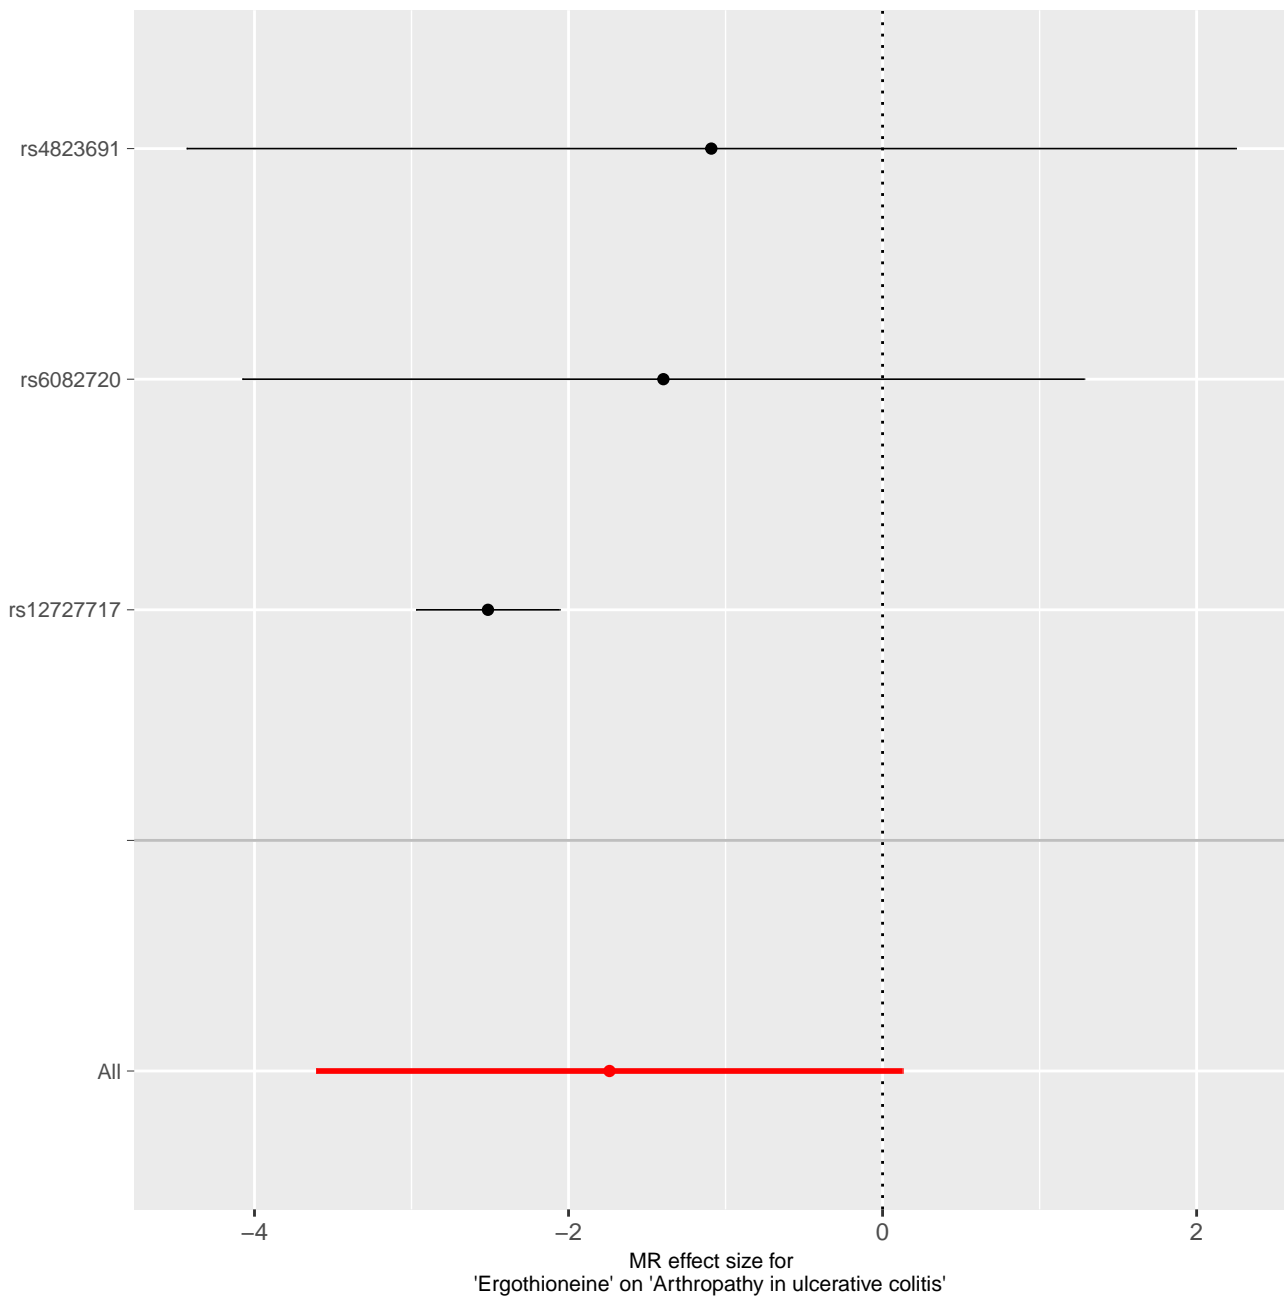

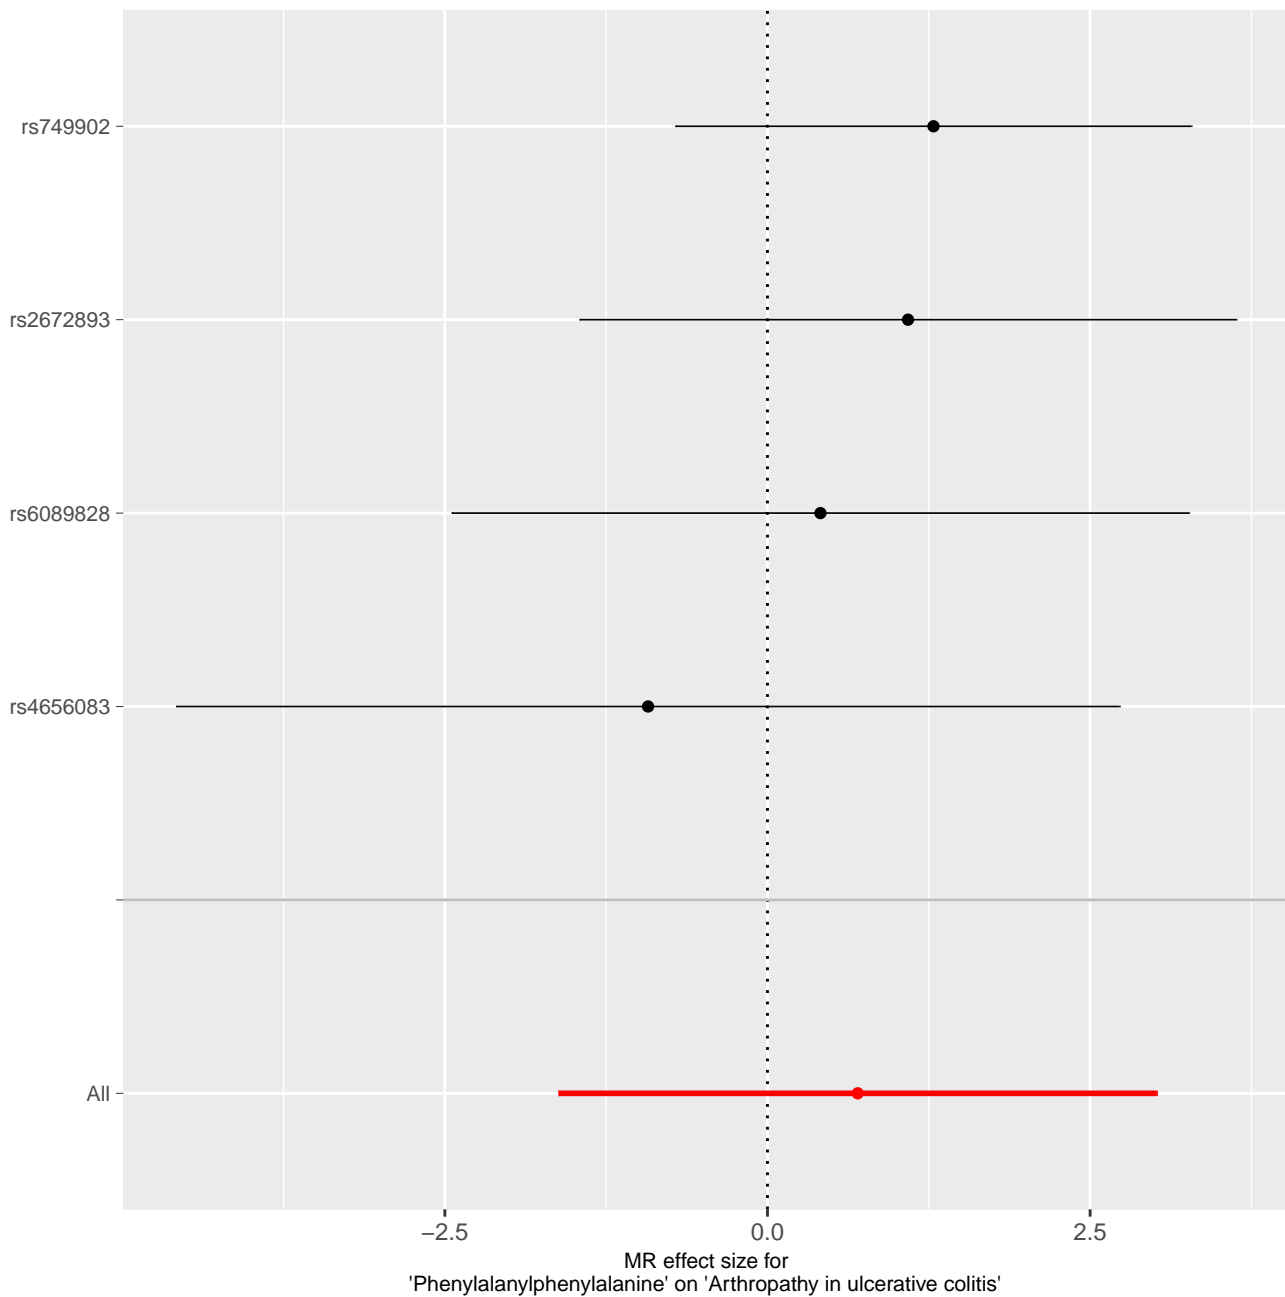

Batch 1925 : 15-methylpalmitate (isobar with 2-methylpalmitate) on Arthropathy in ulcerative colitis

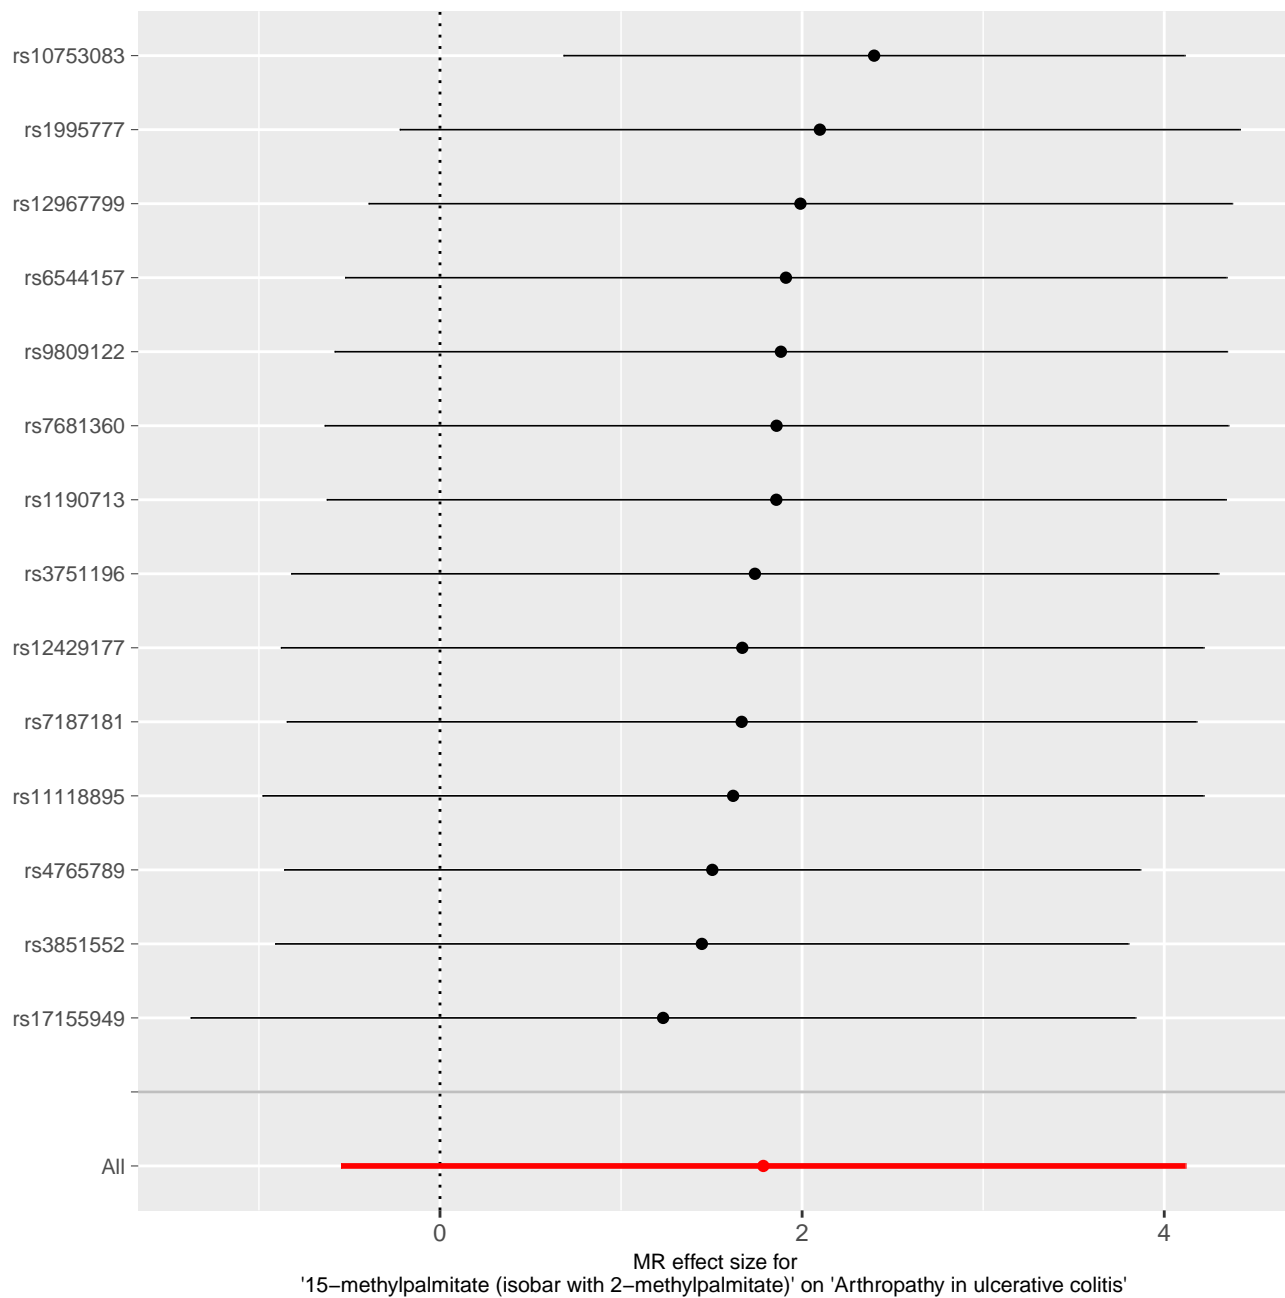



Batch 1927 : Tryptophan on Ulcerative pancolitis

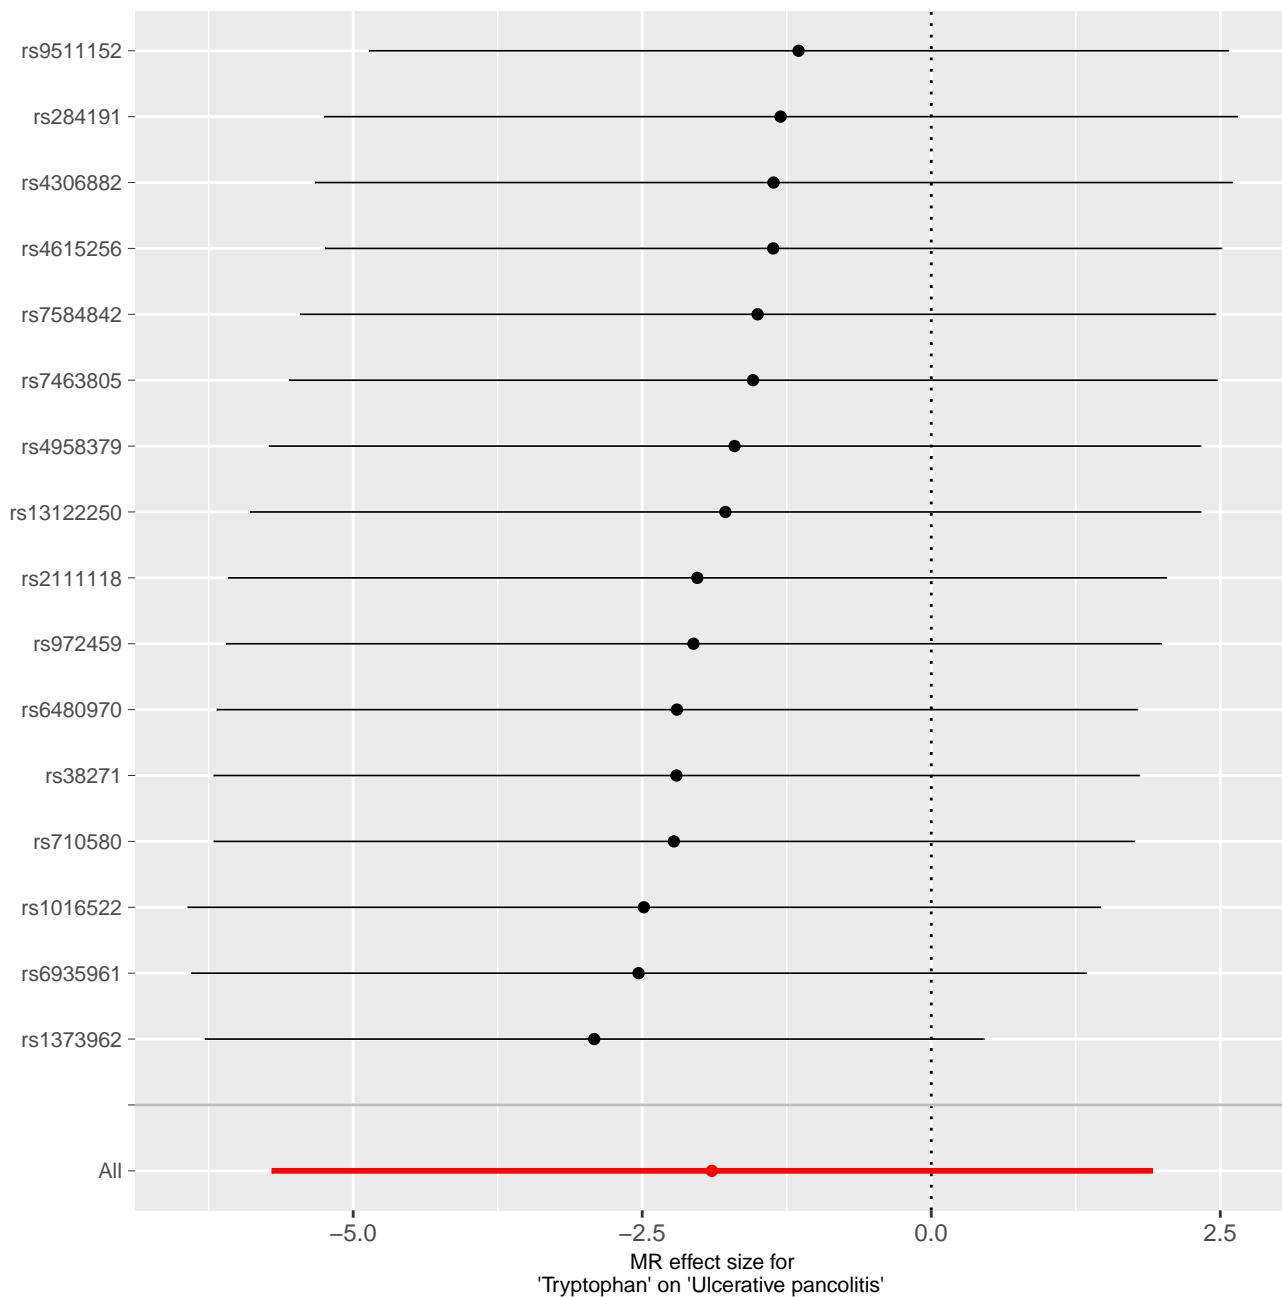

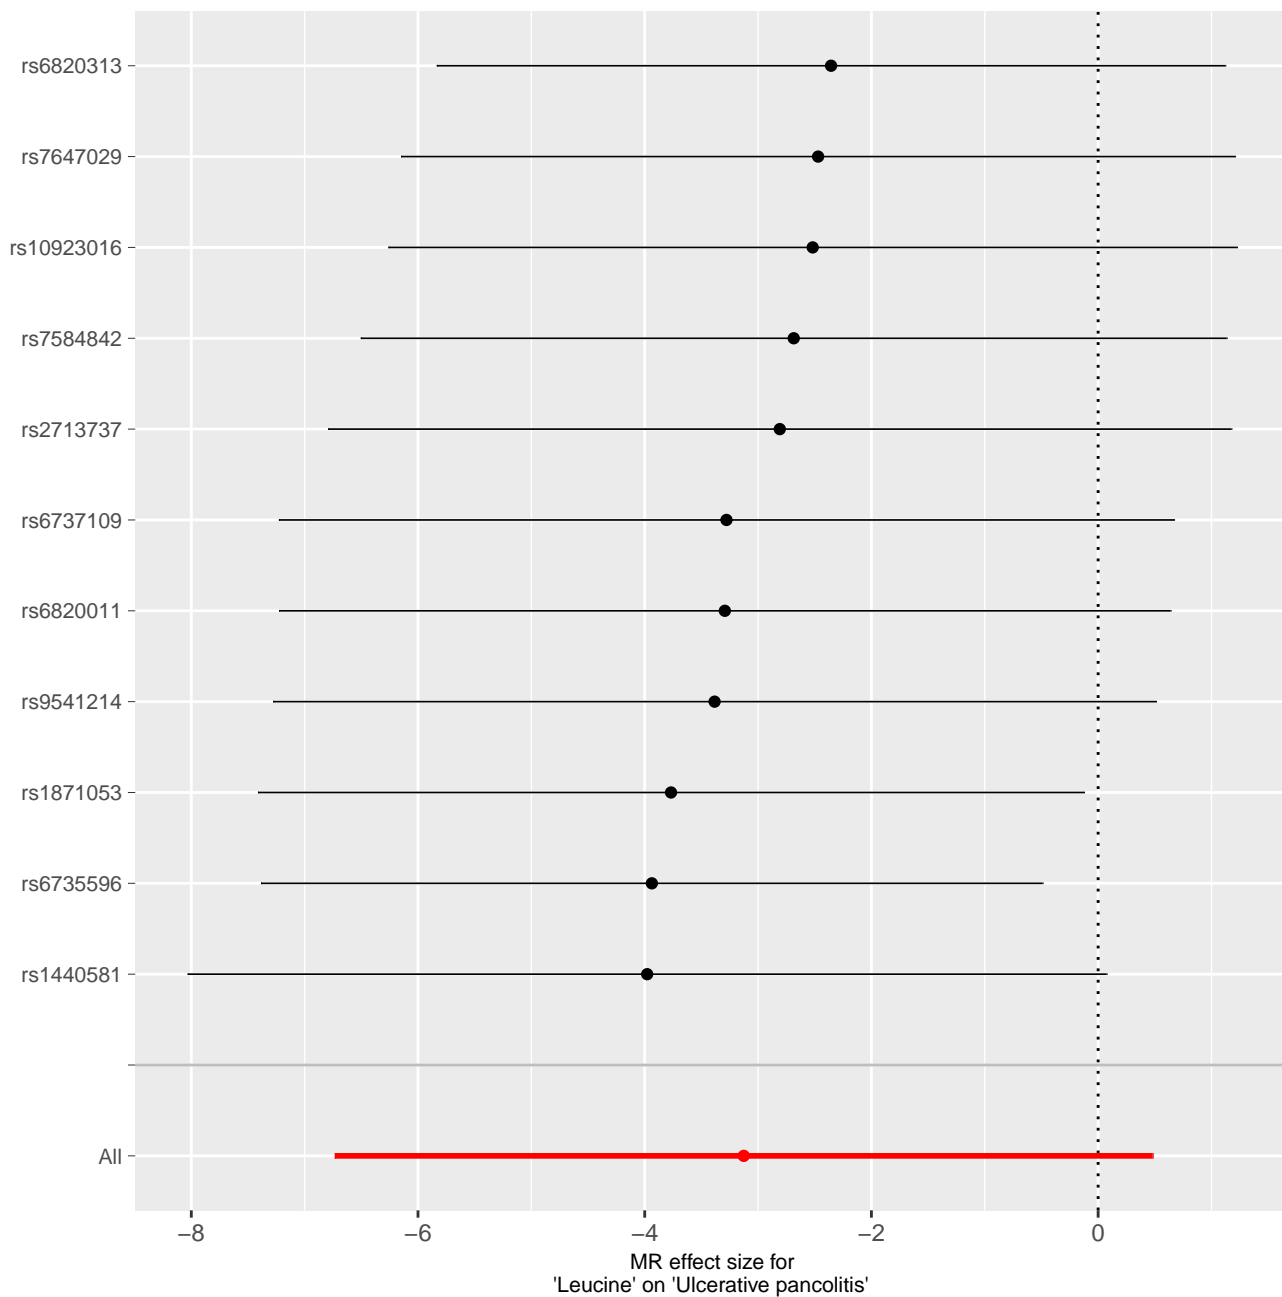

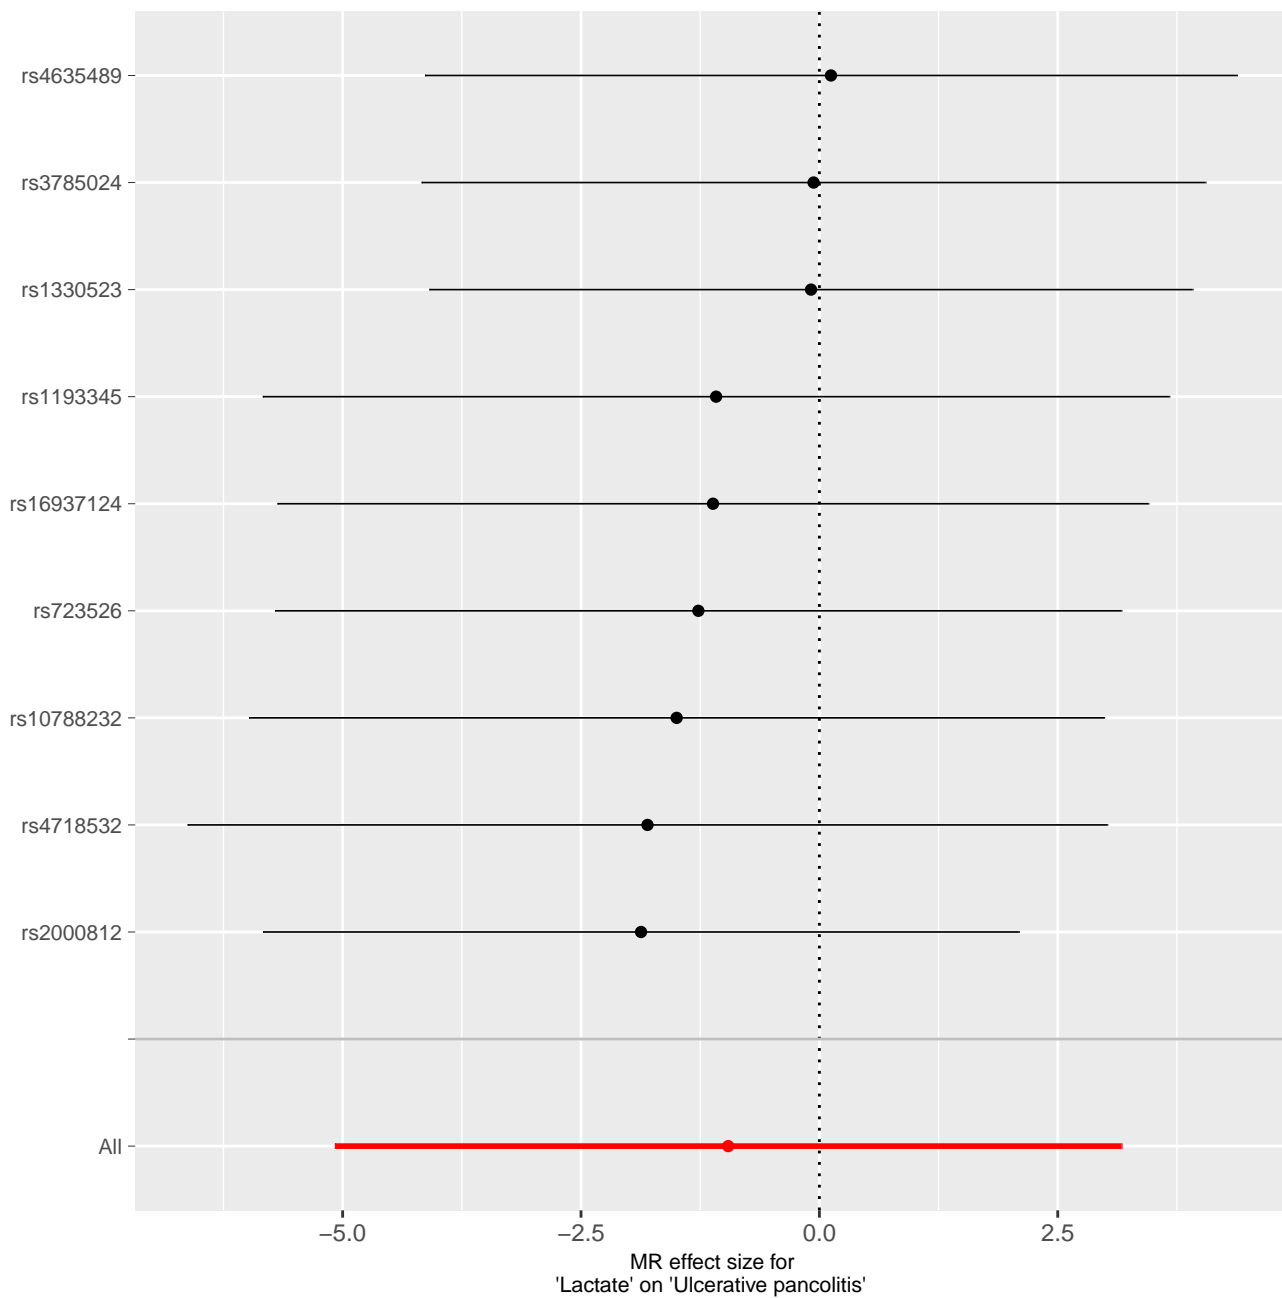

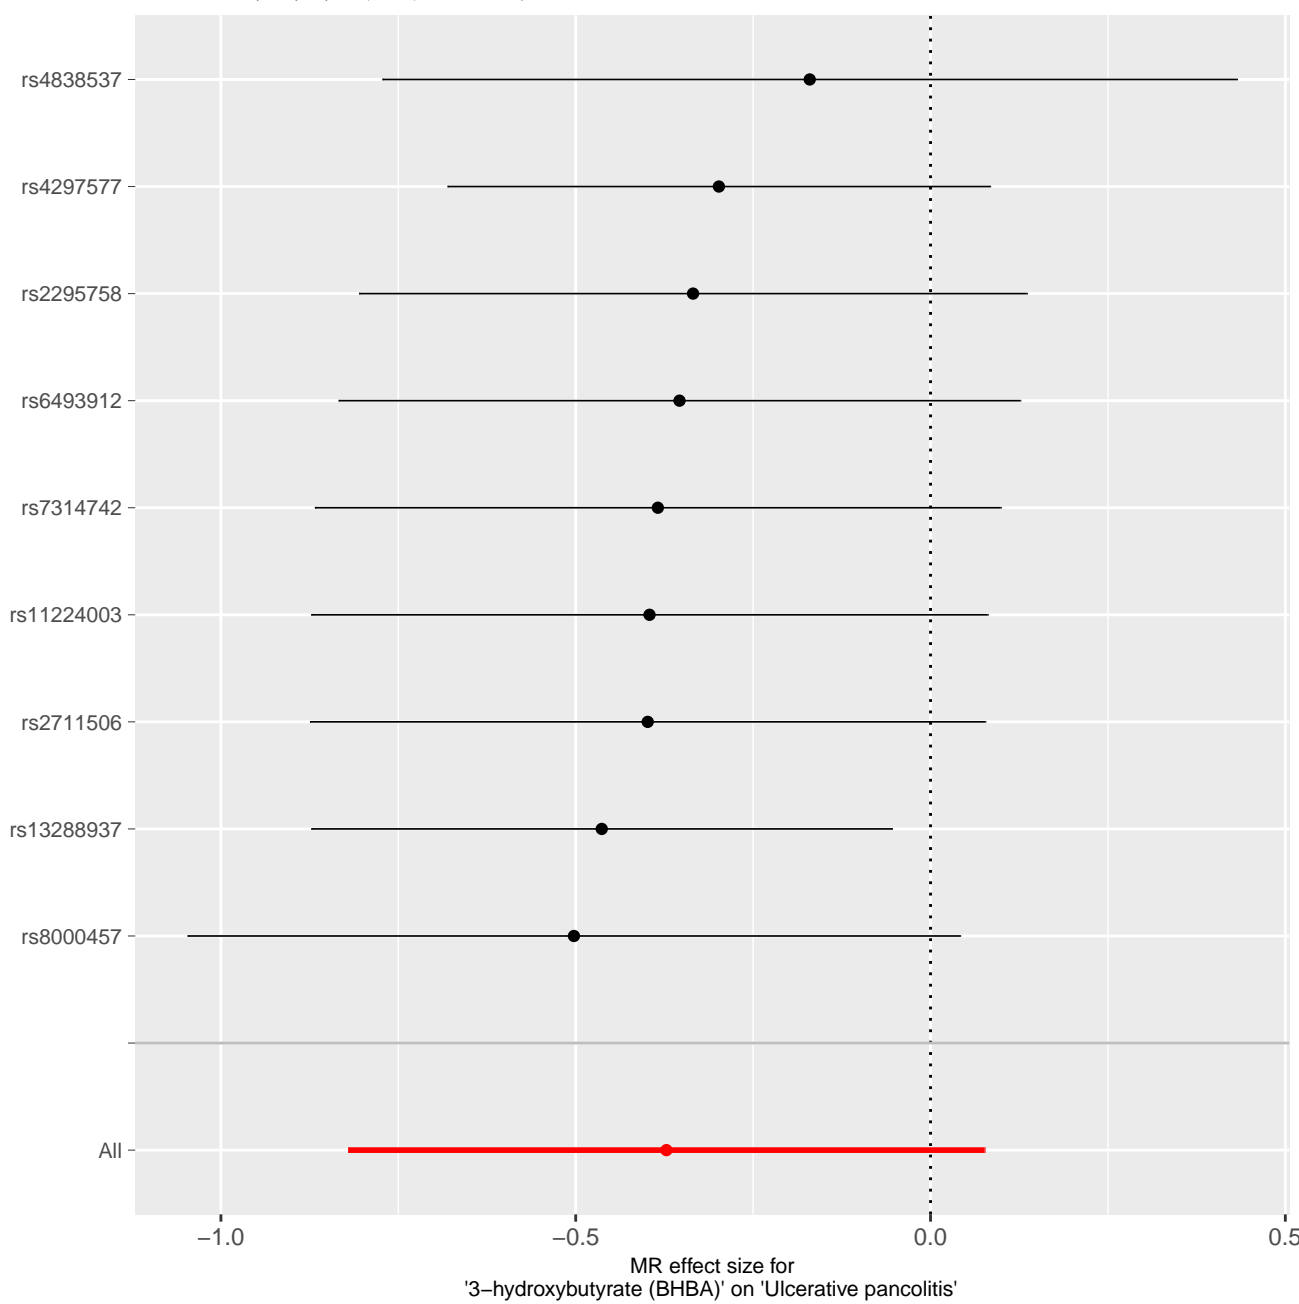

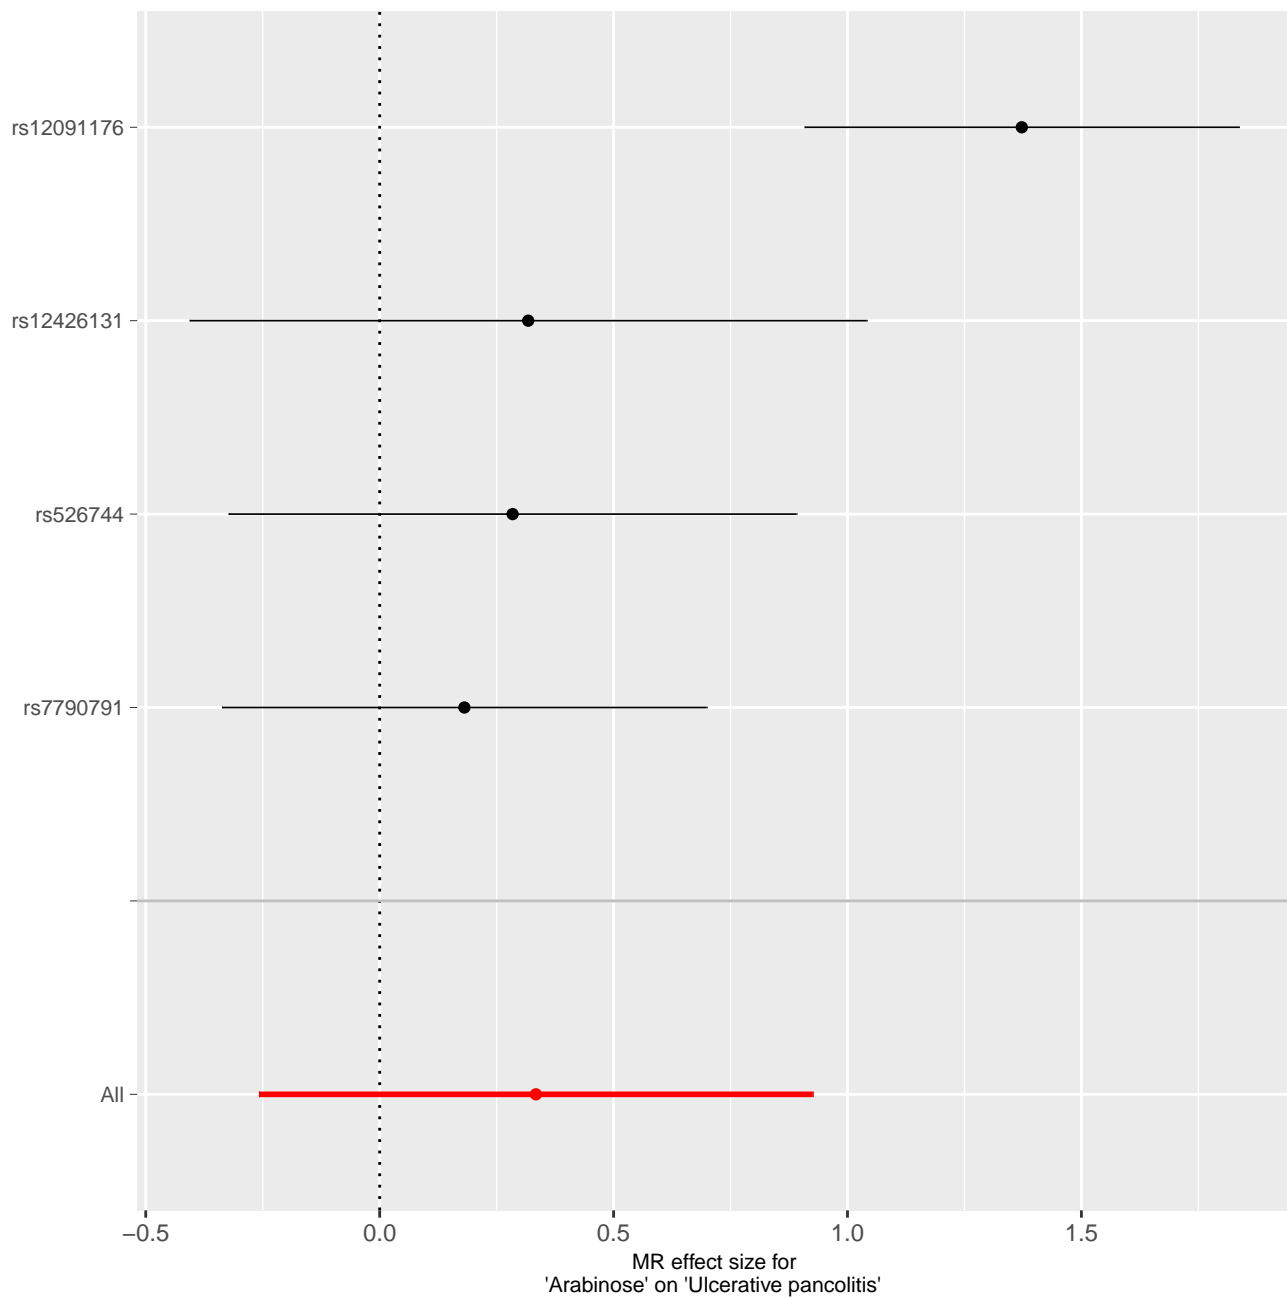

rs2456584

rs661454

rs4663119

All

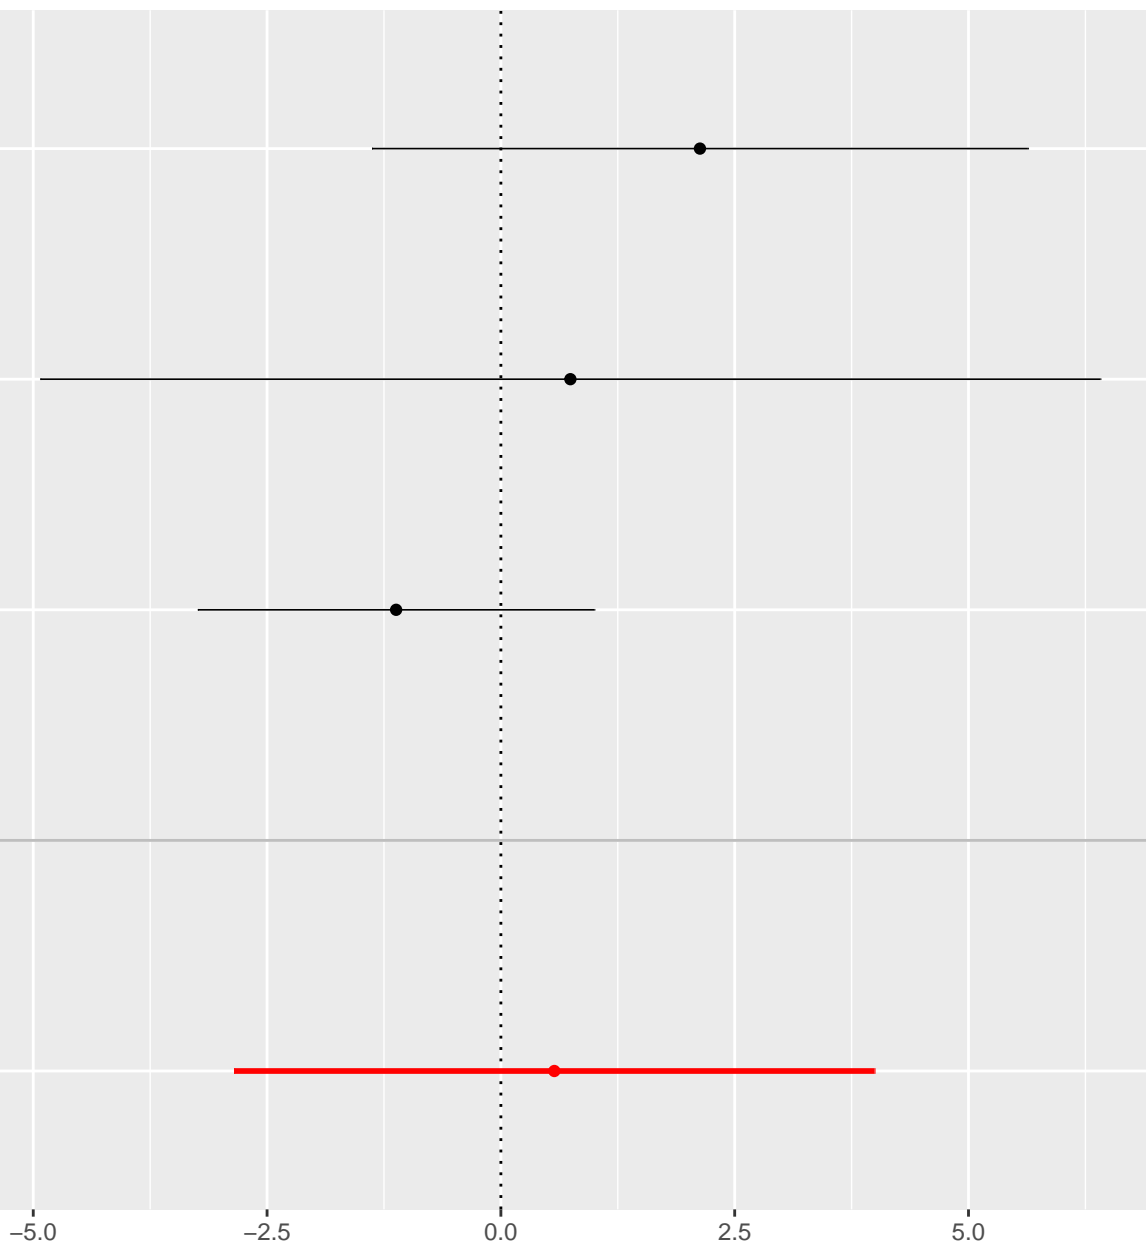

MR effect size for  
'Fructose' on 'Ulcerative pancolitis'

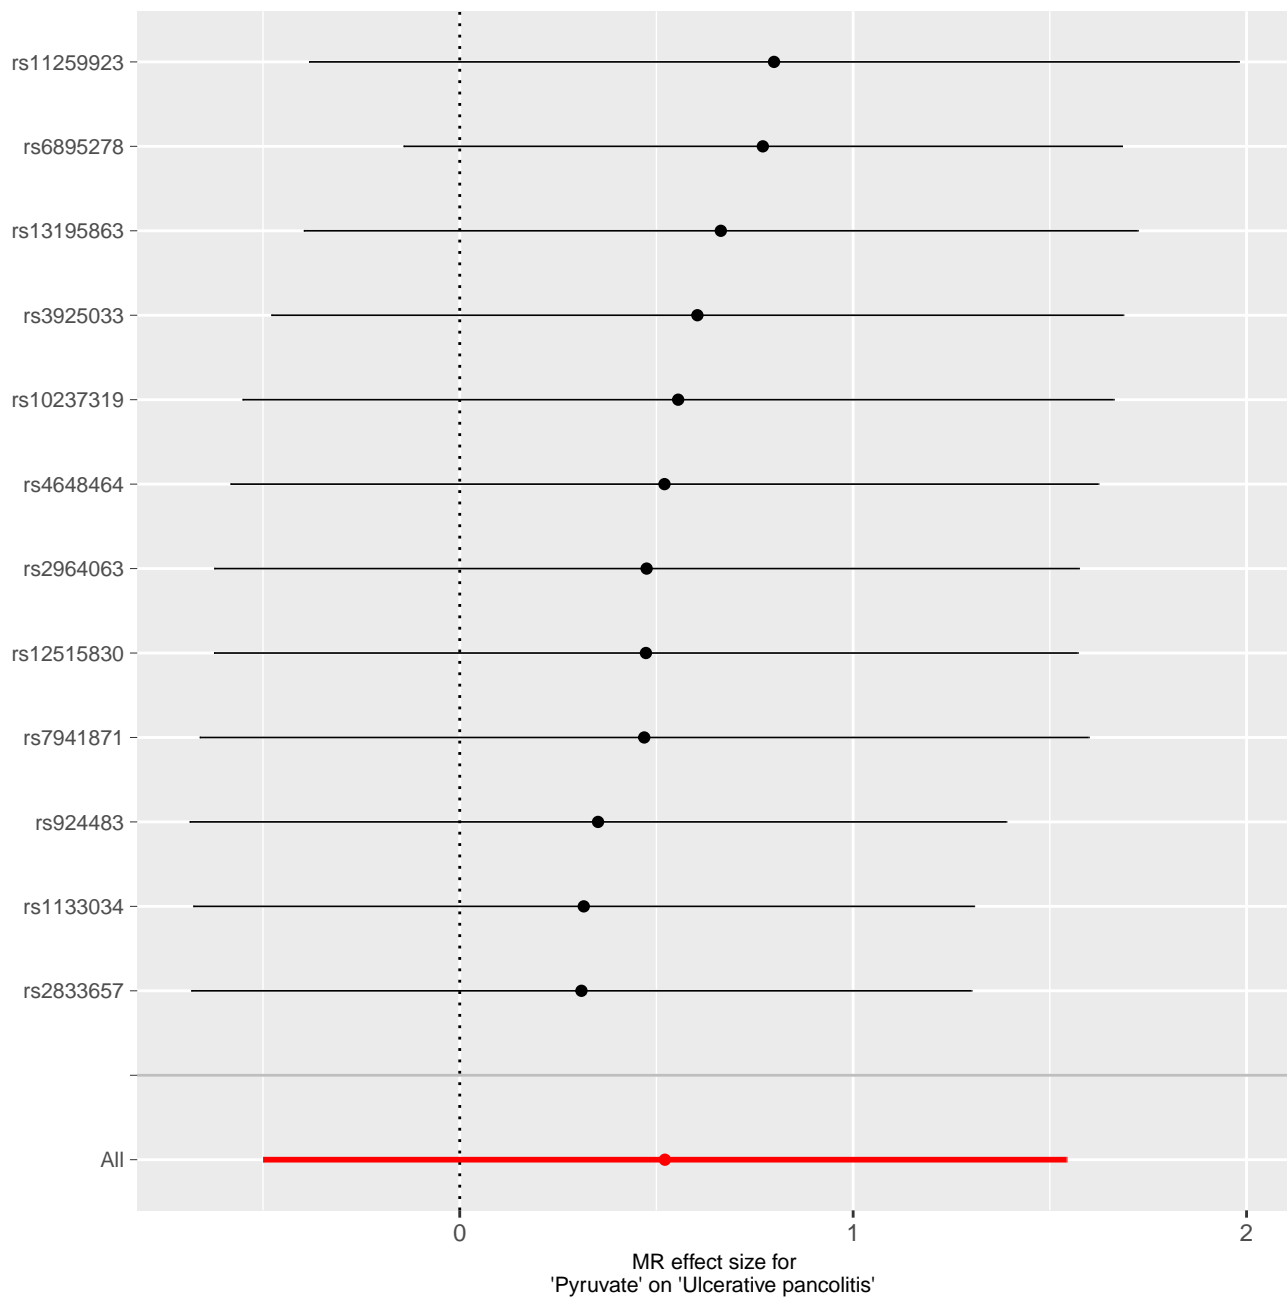

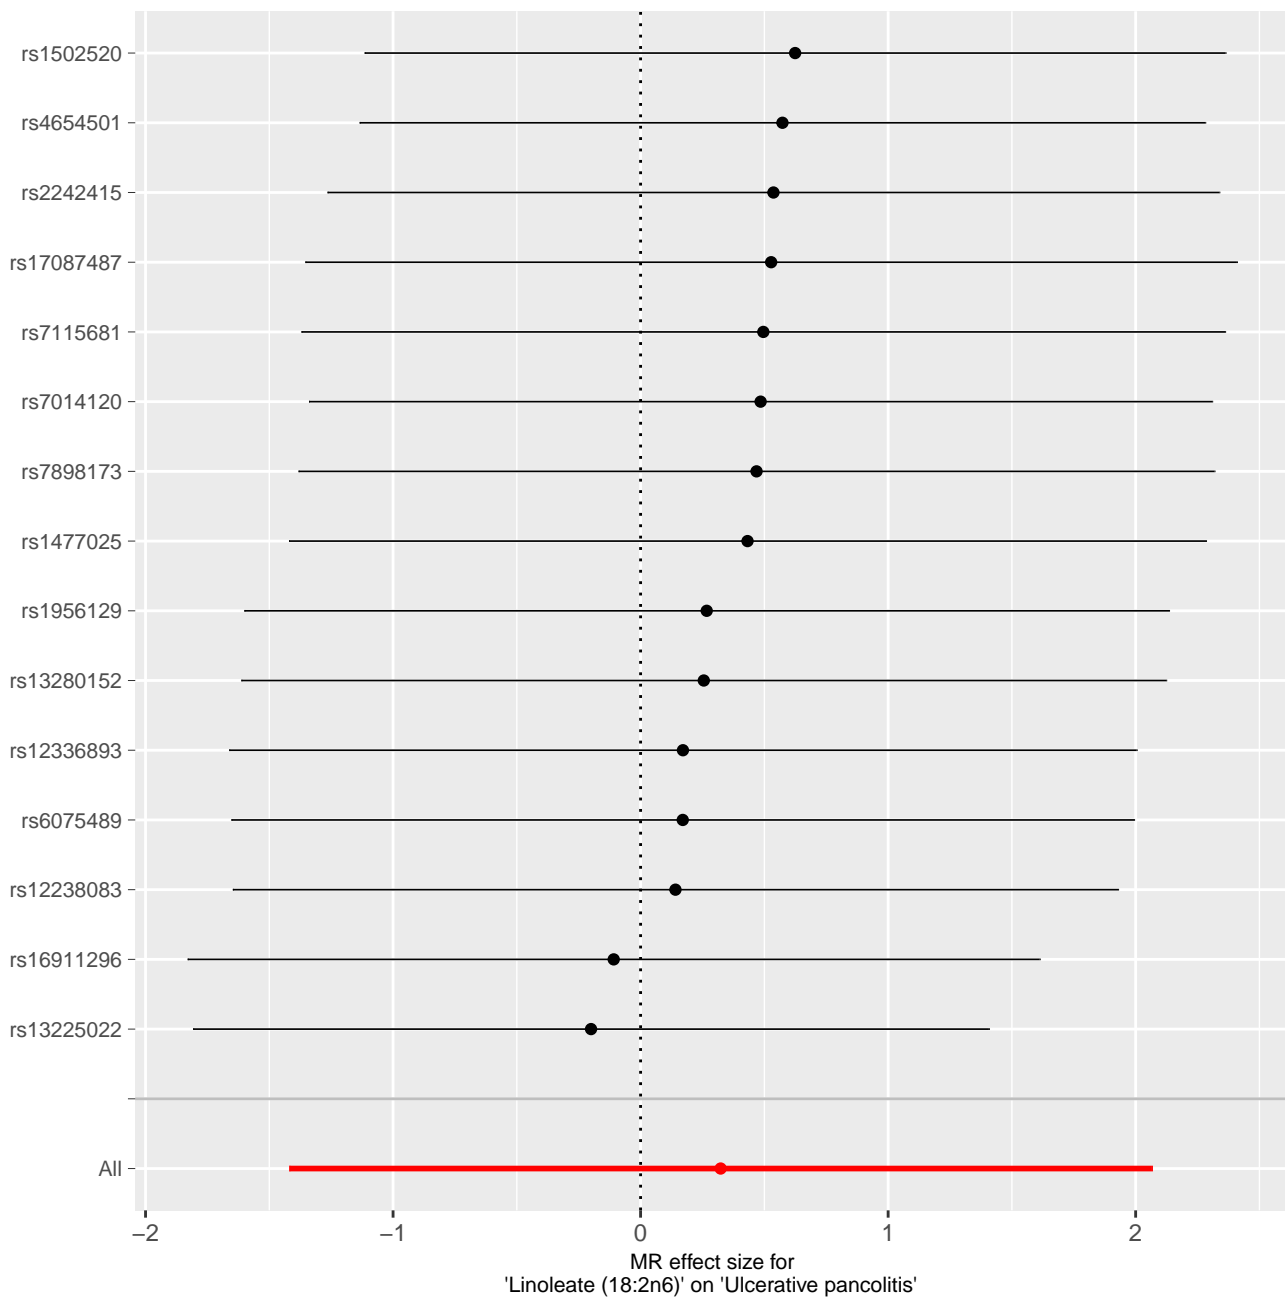



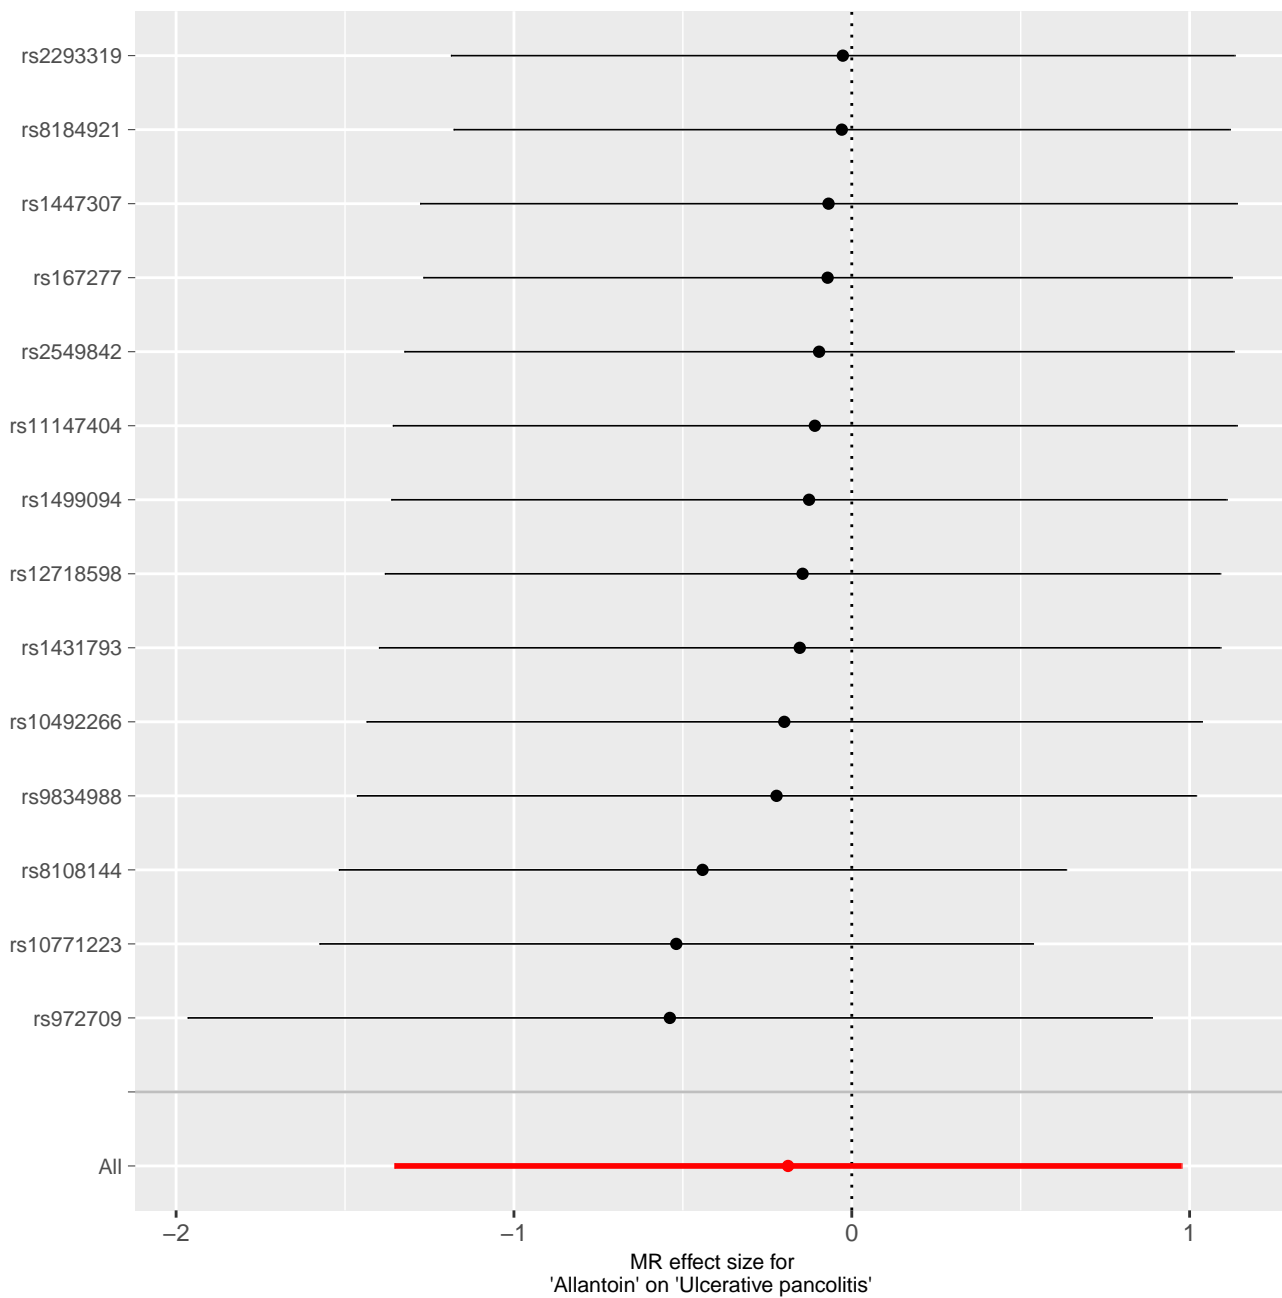

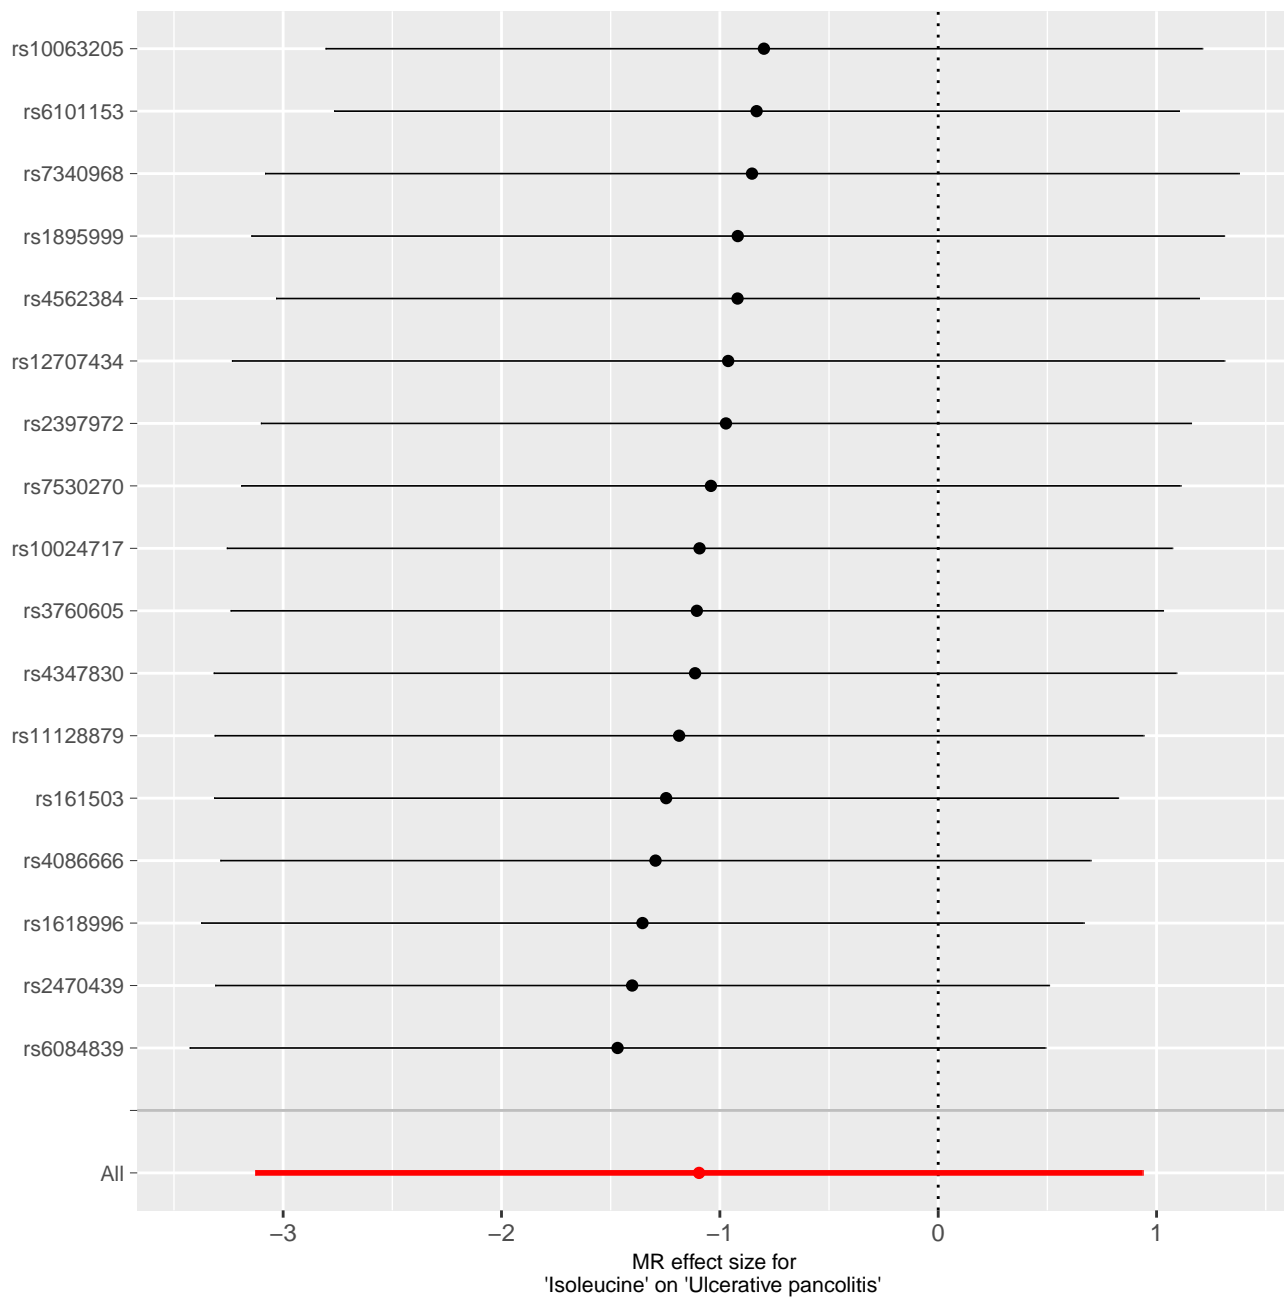

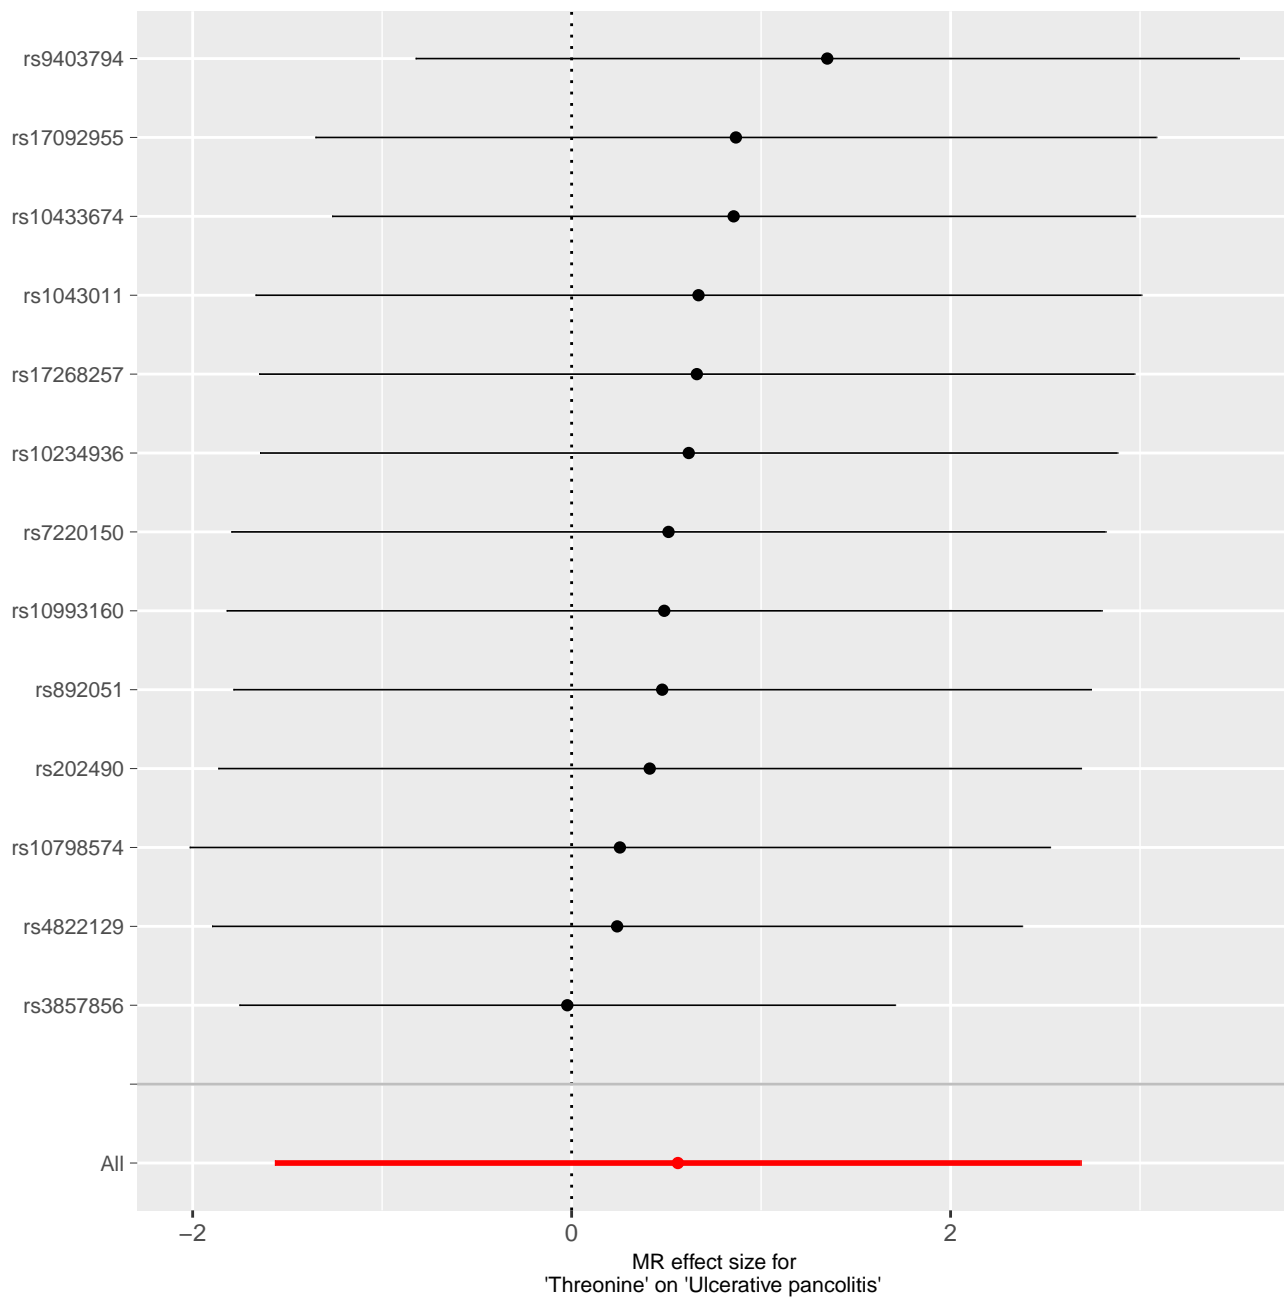

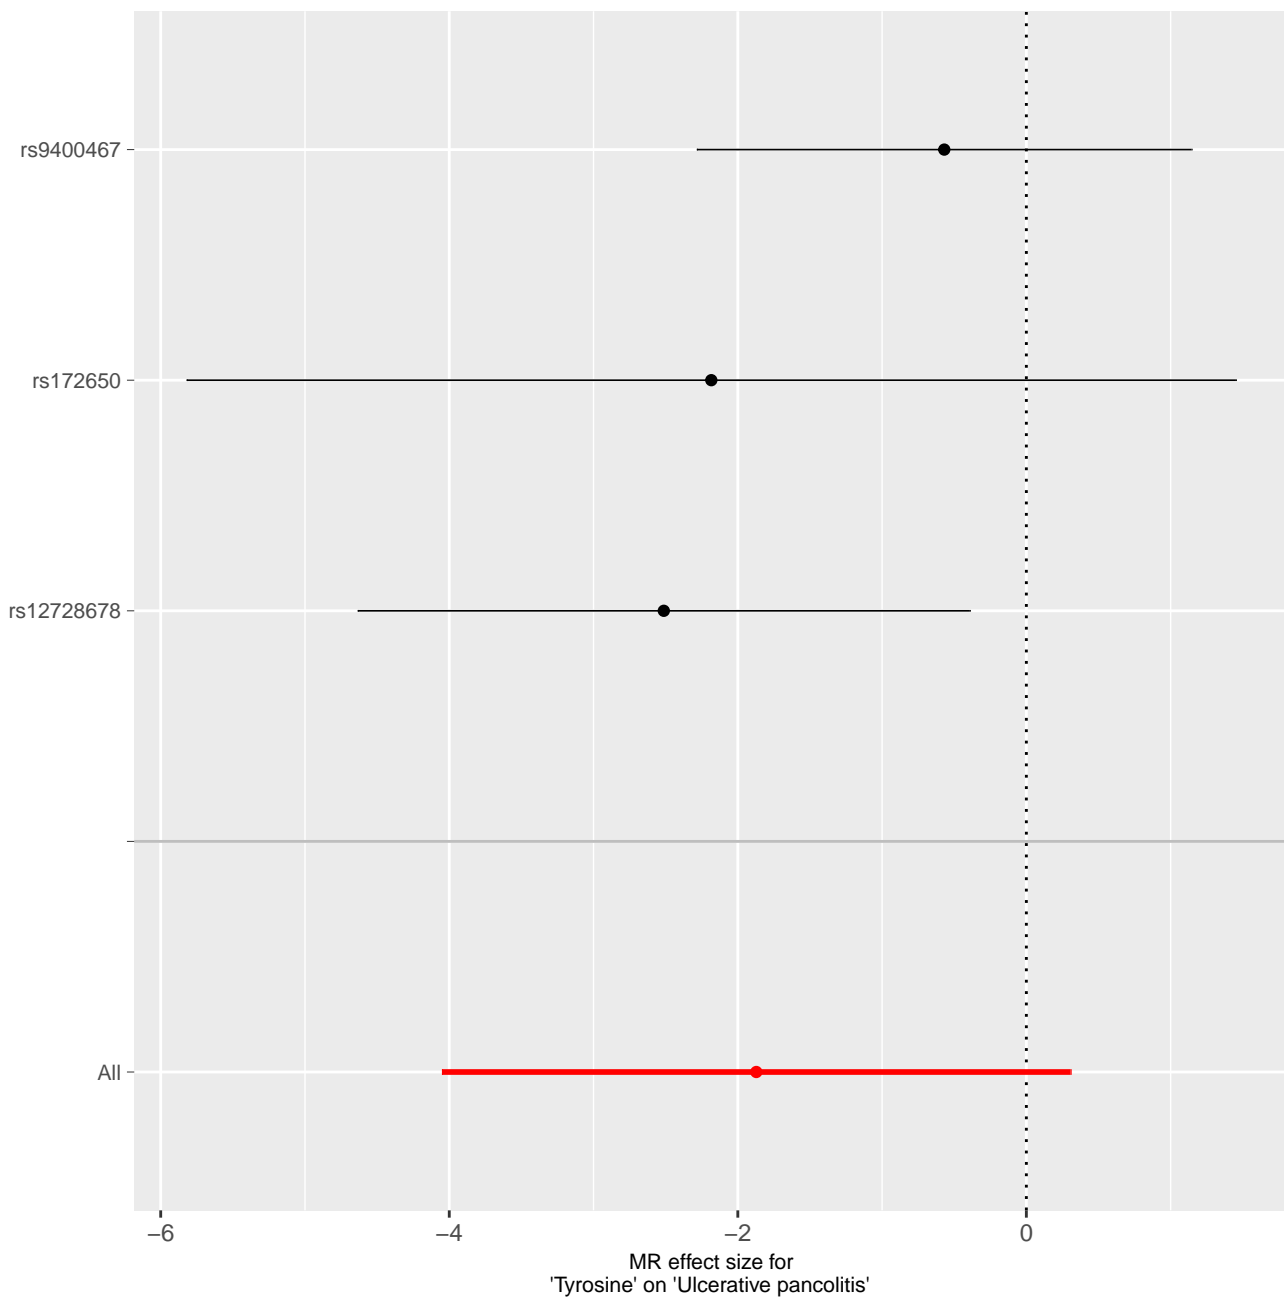

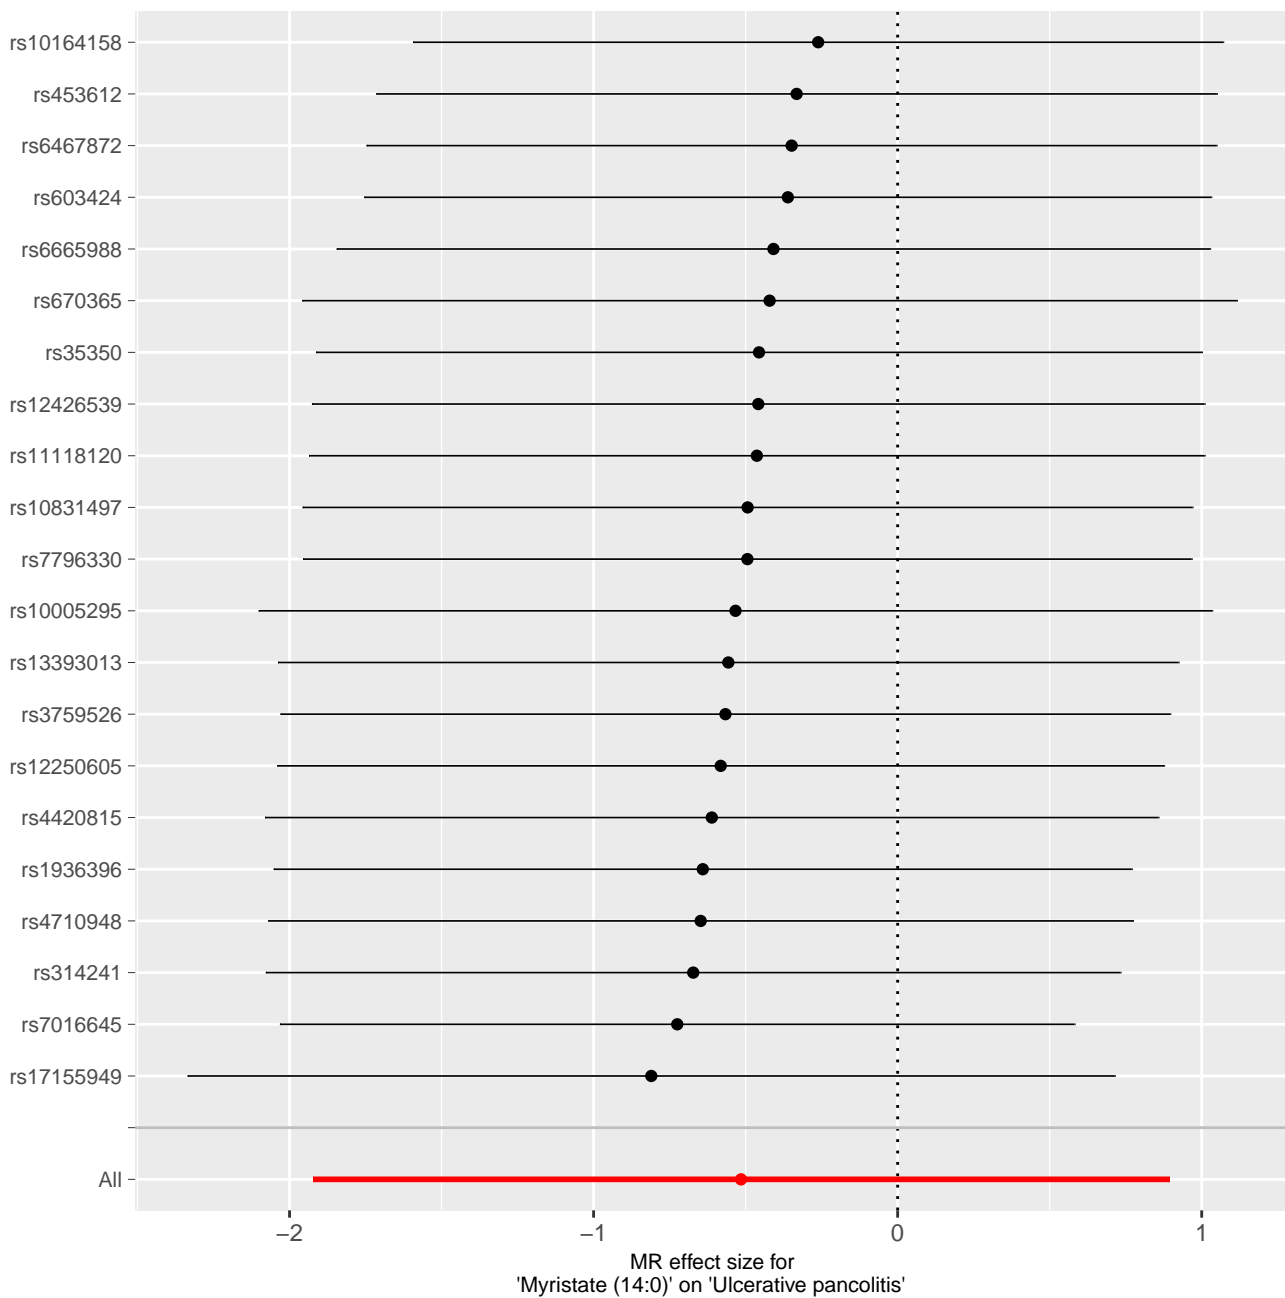

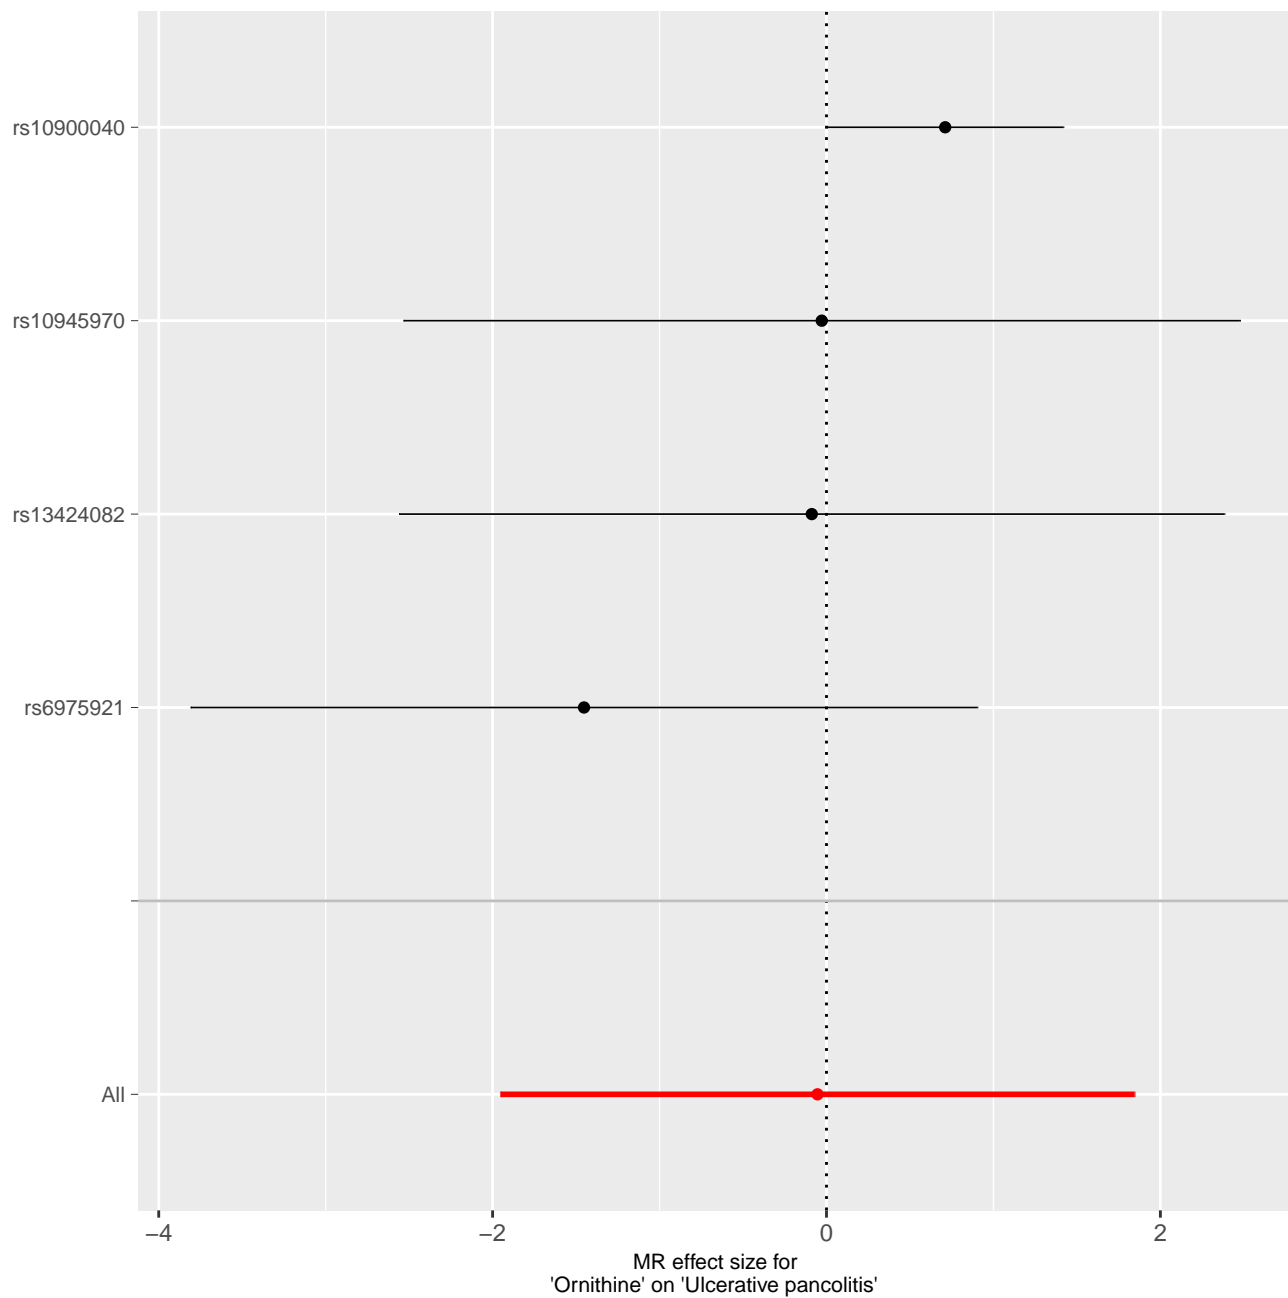

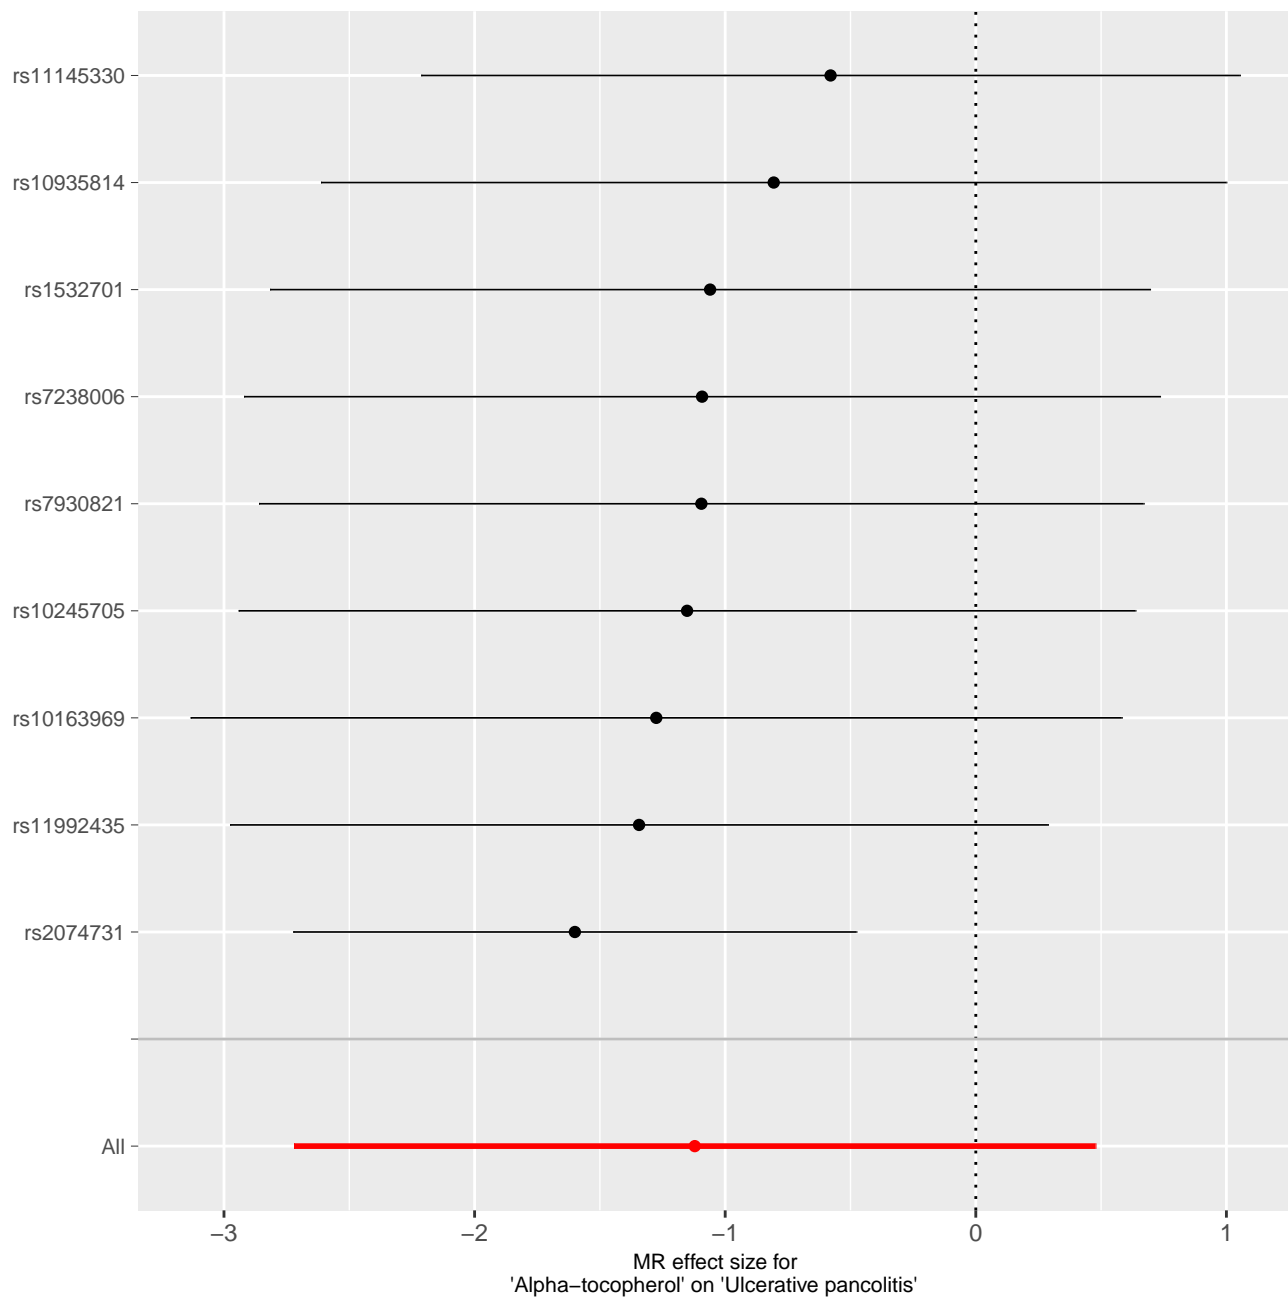

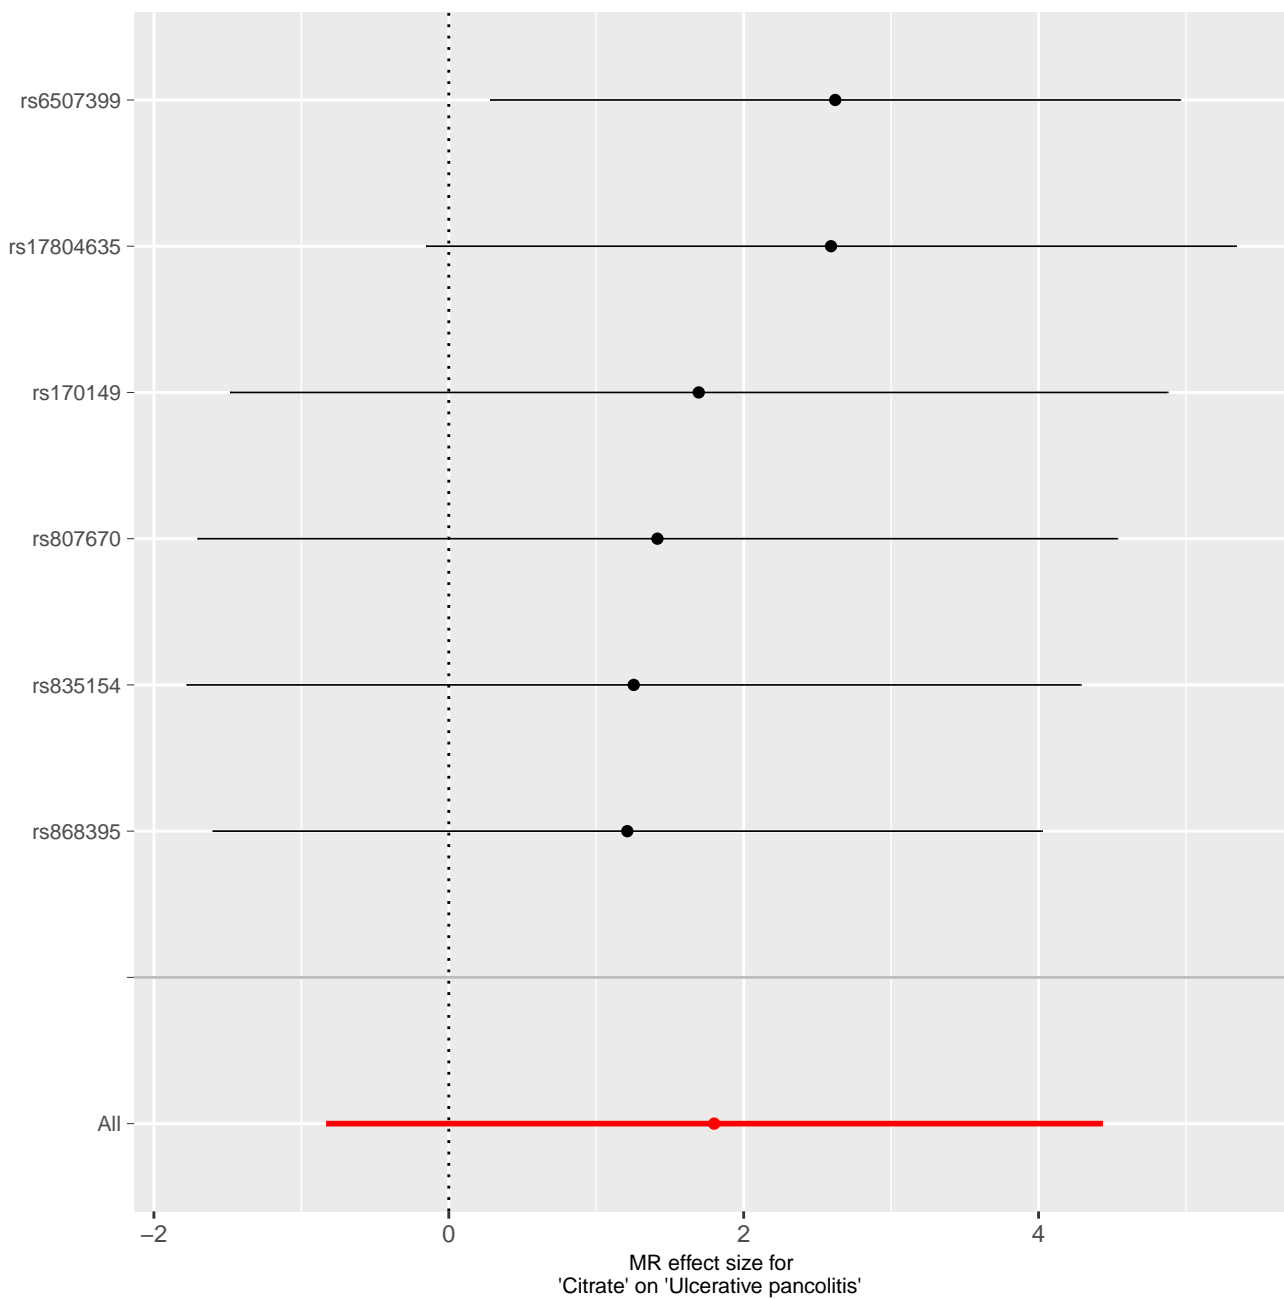



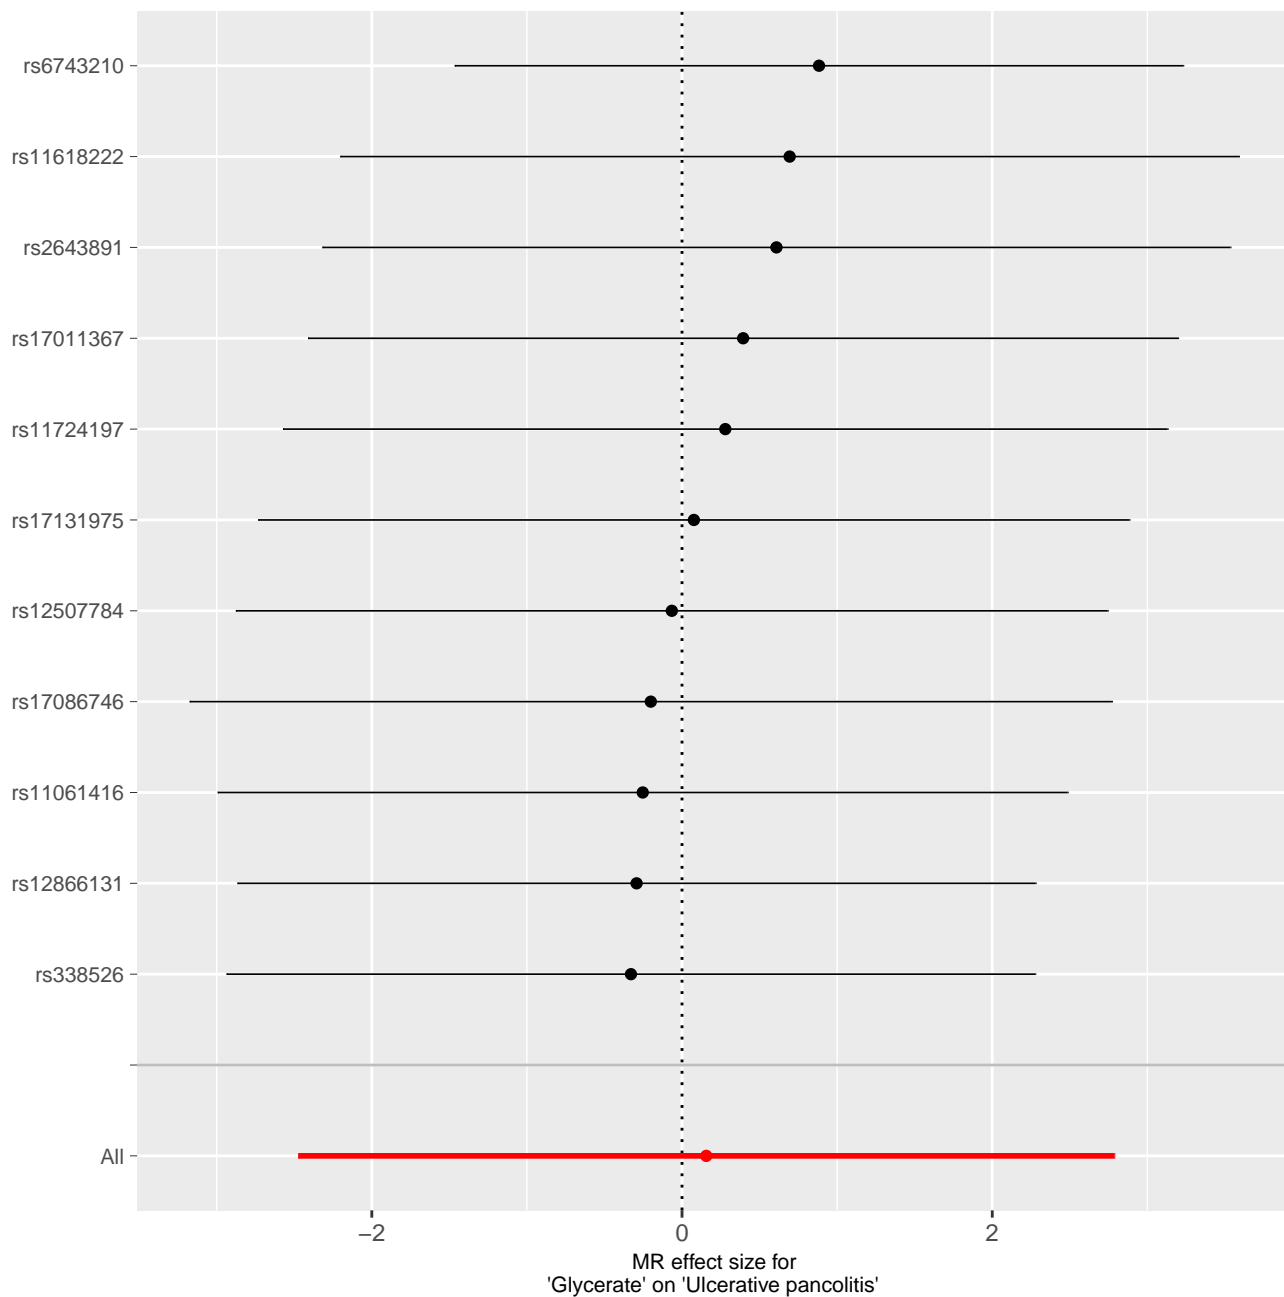

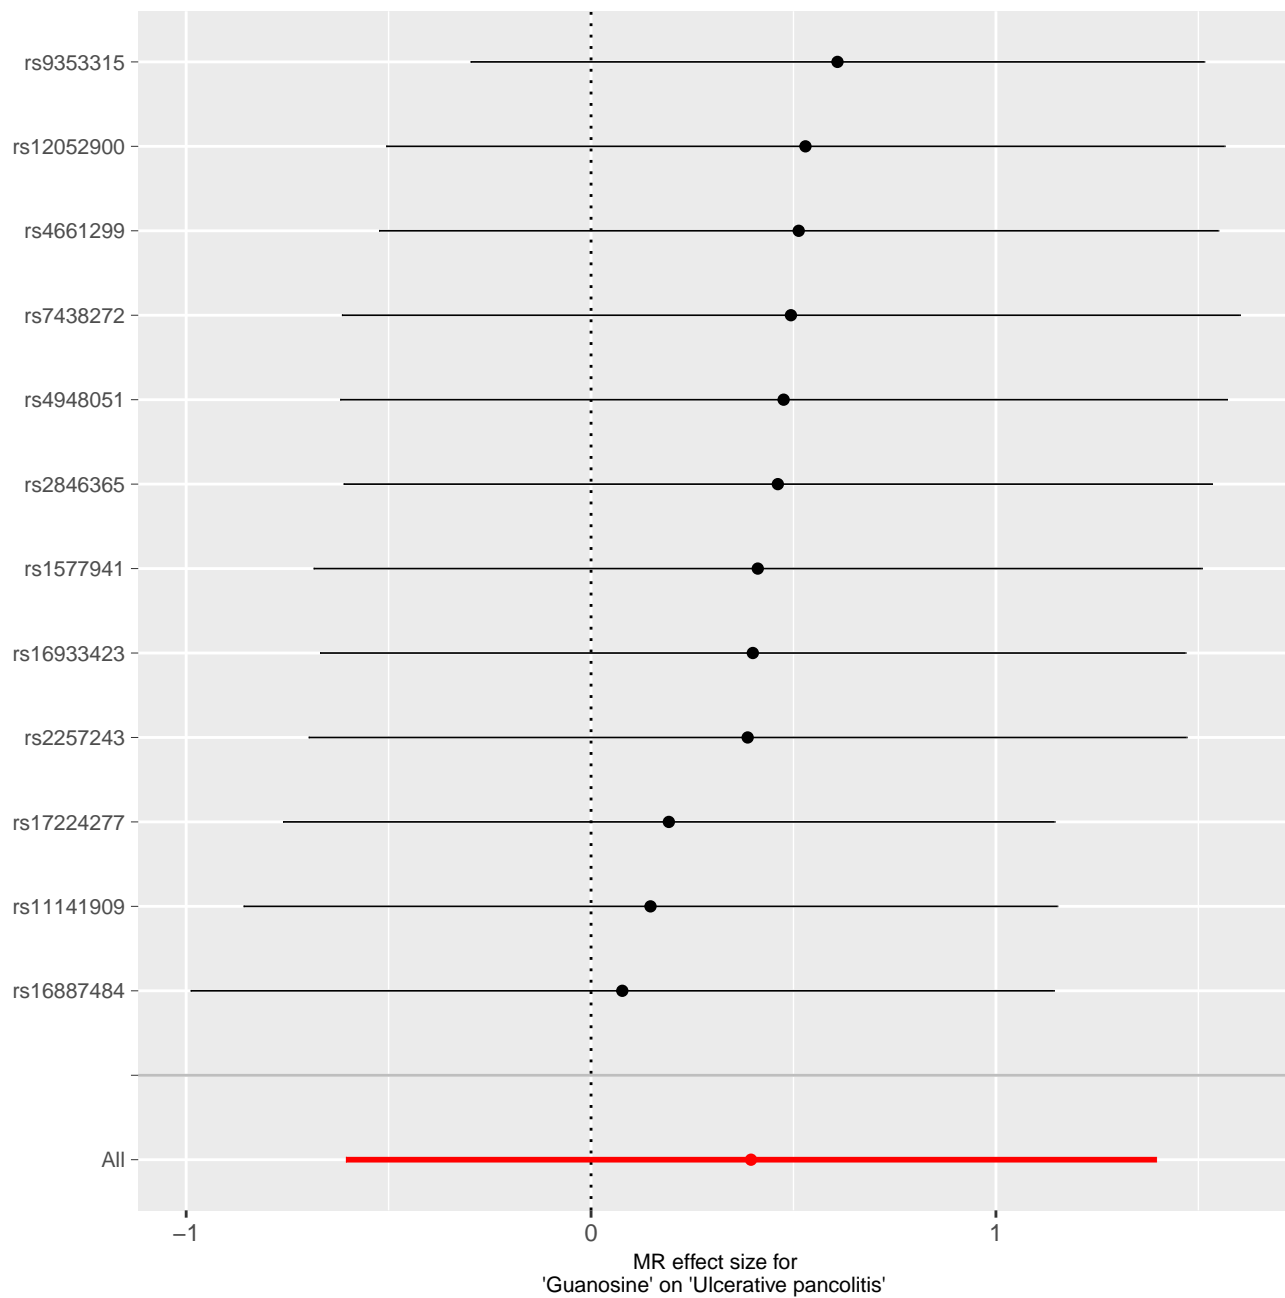

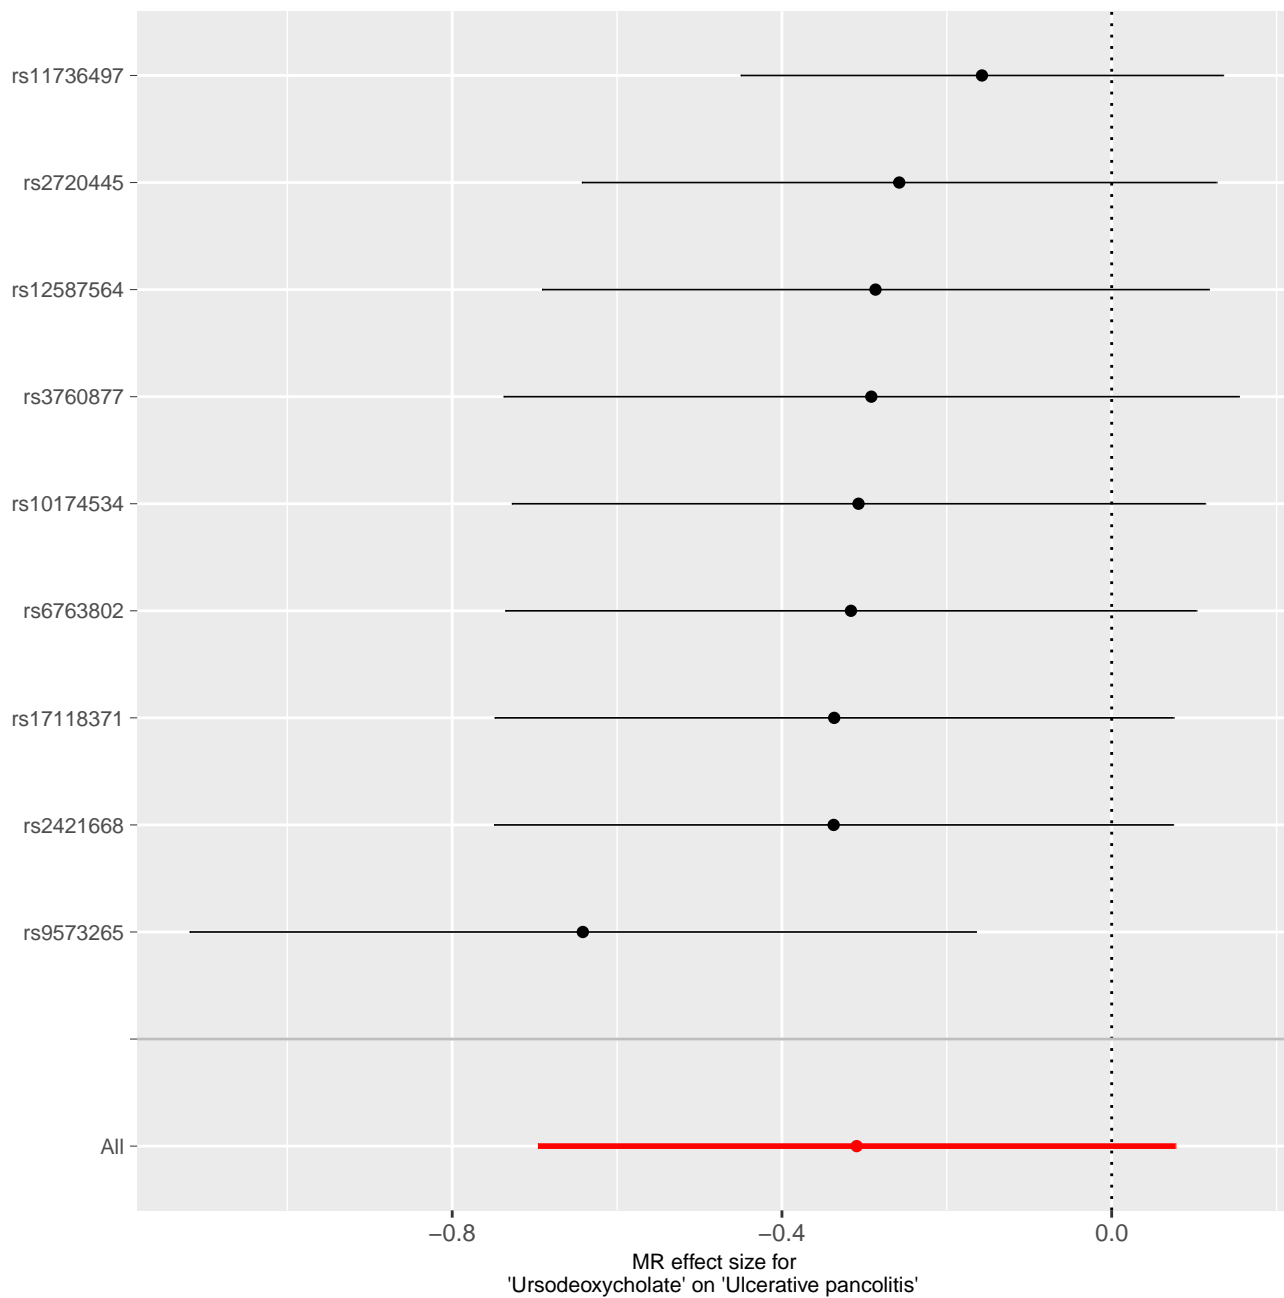

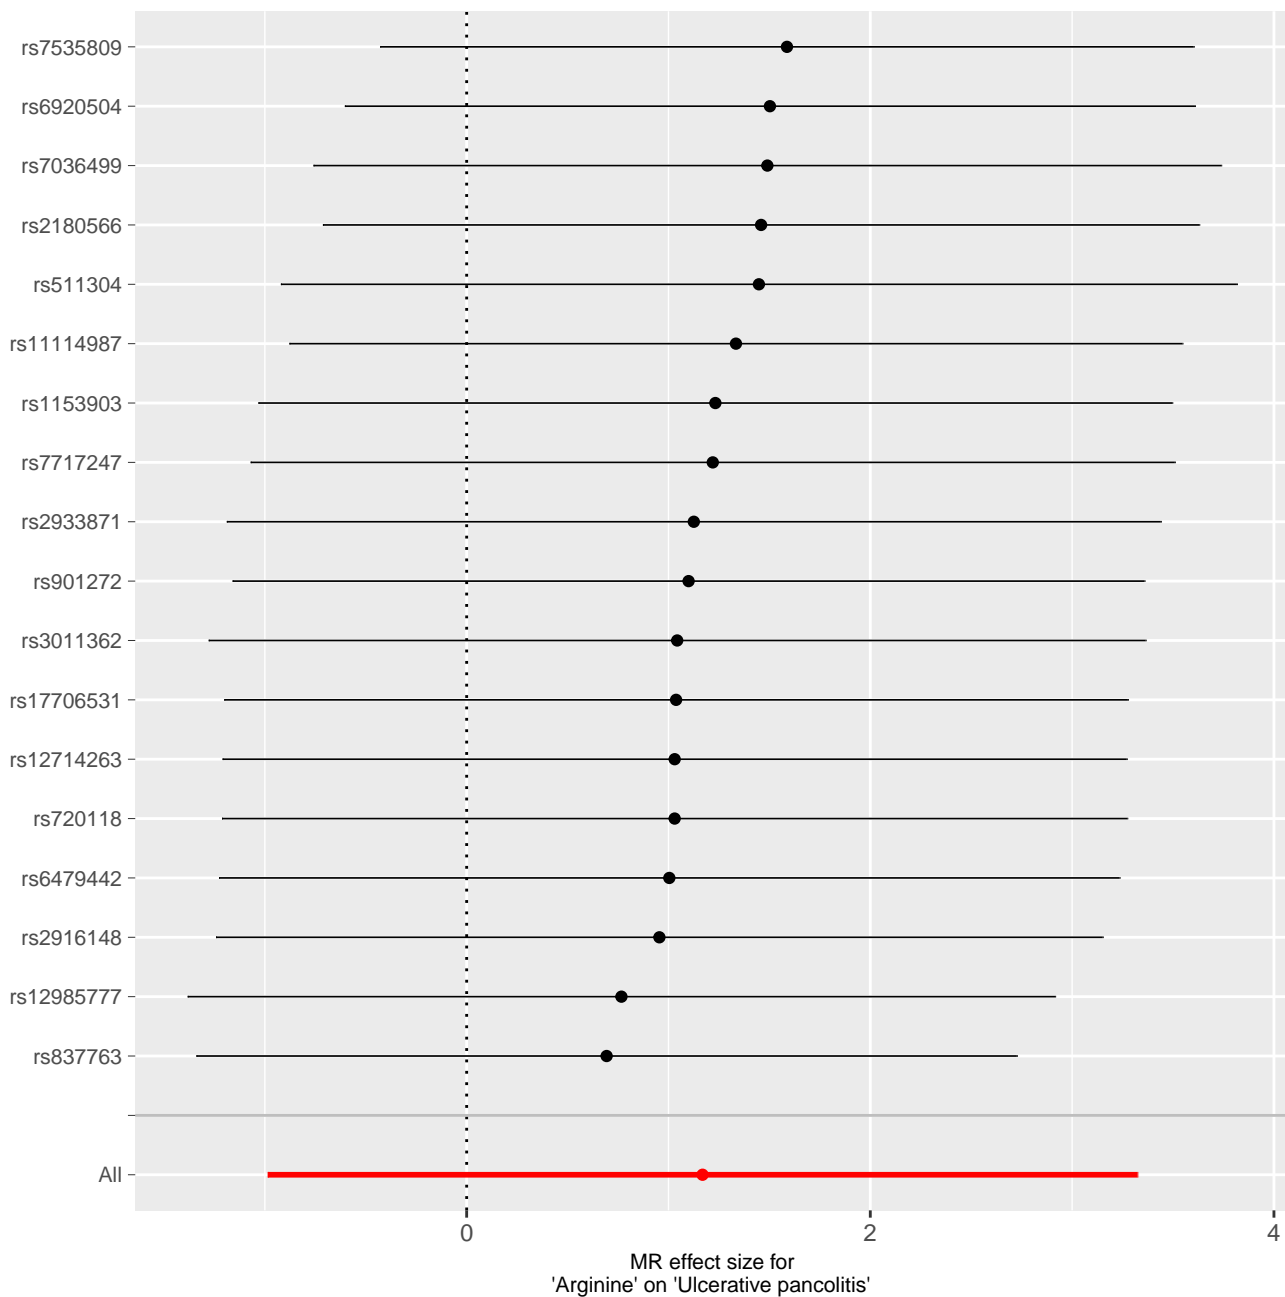

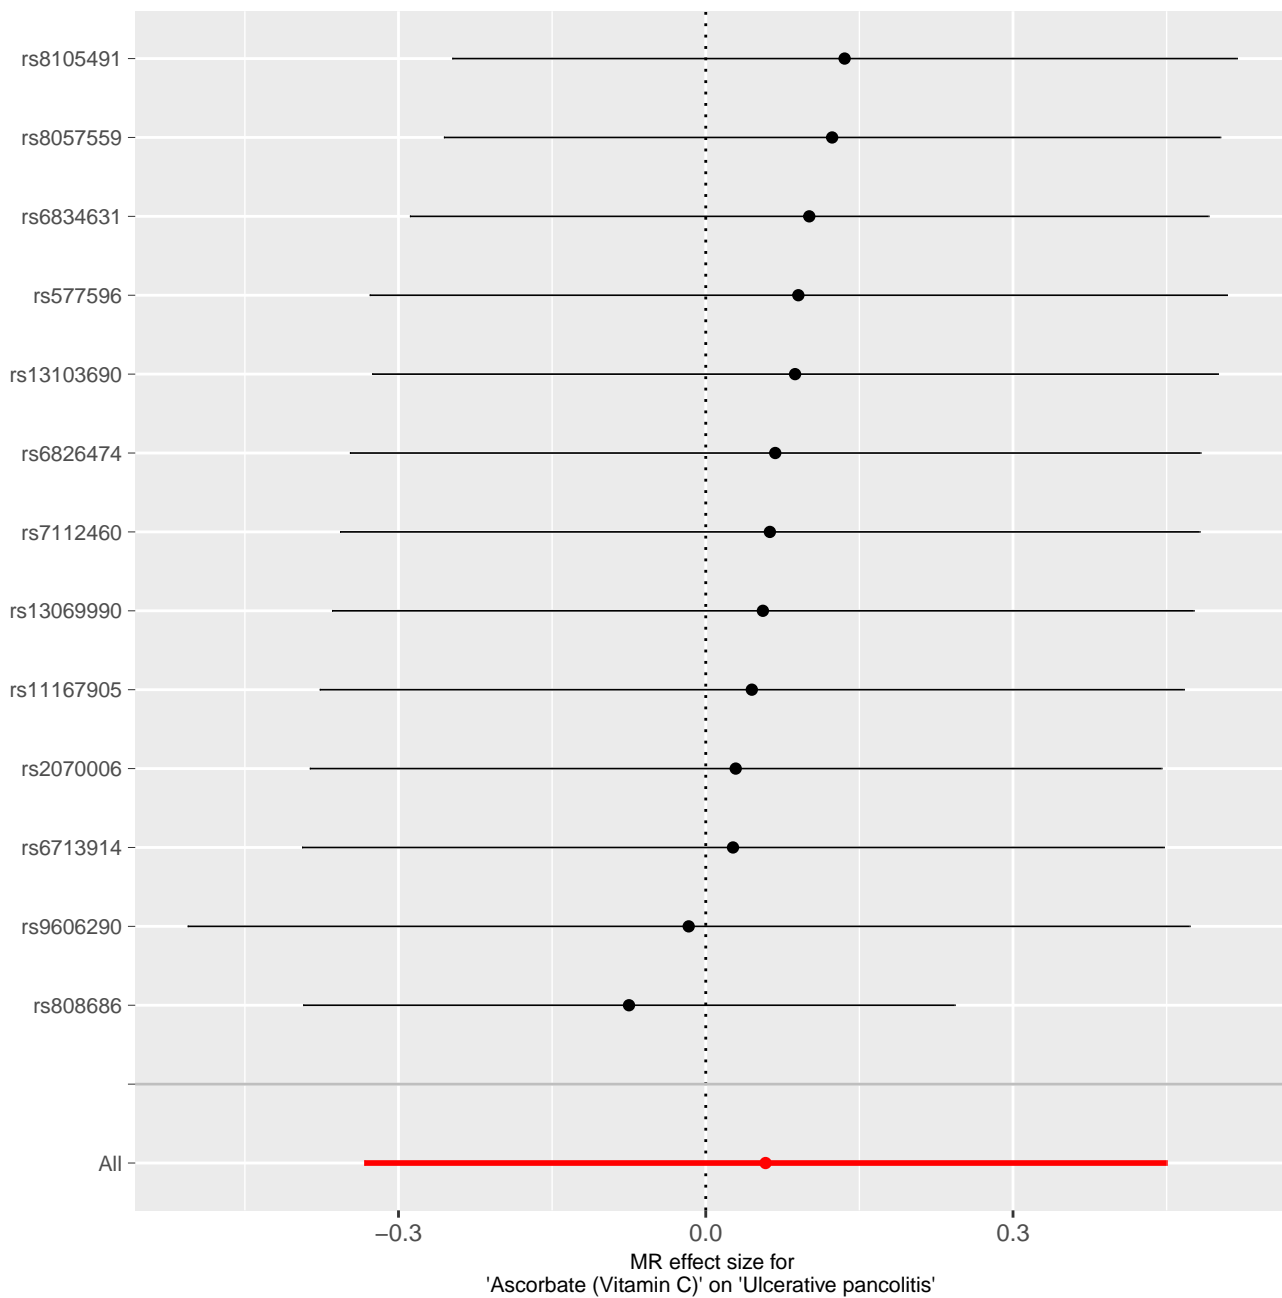

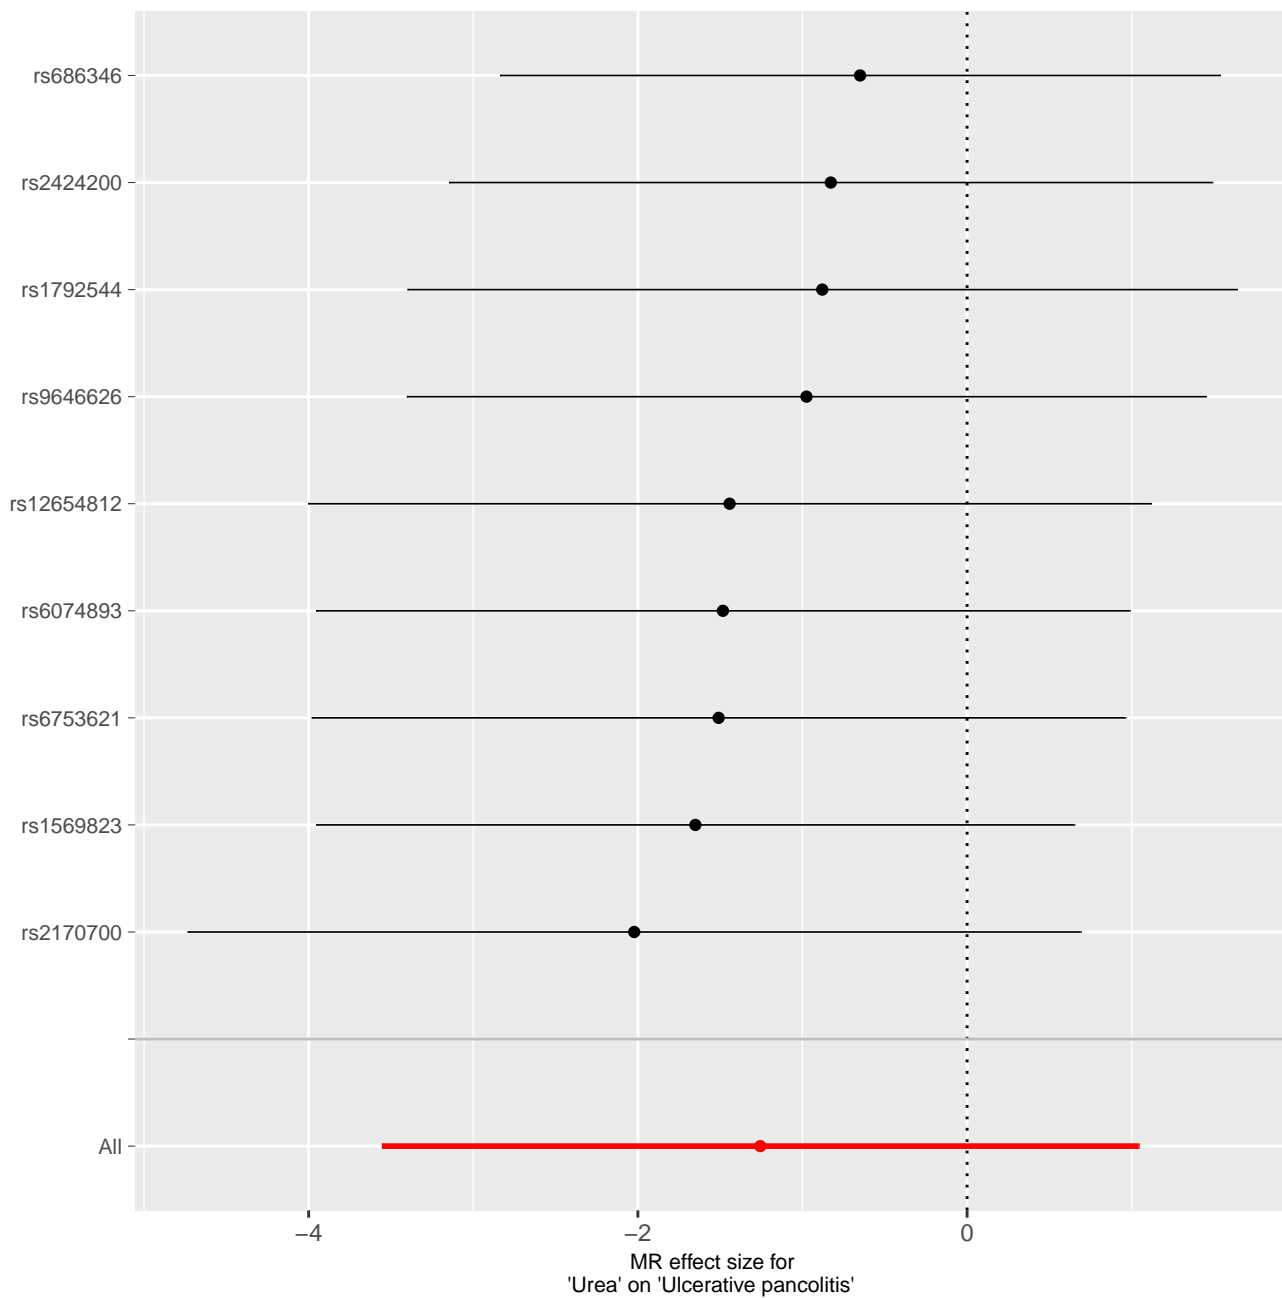

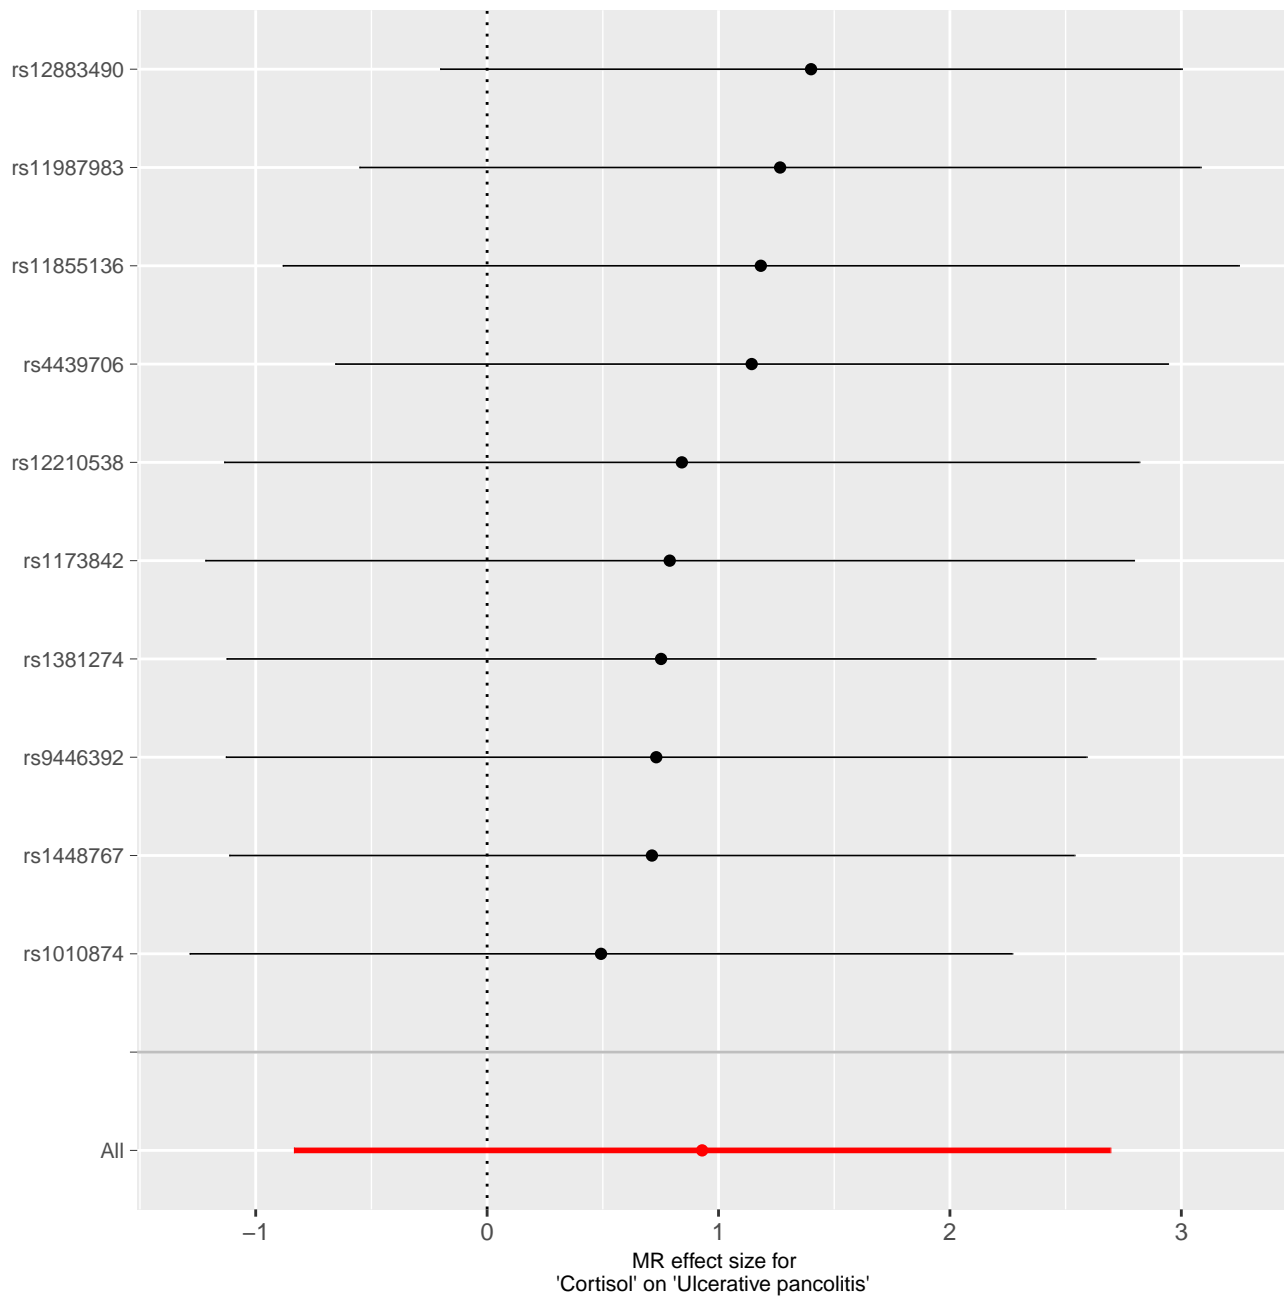

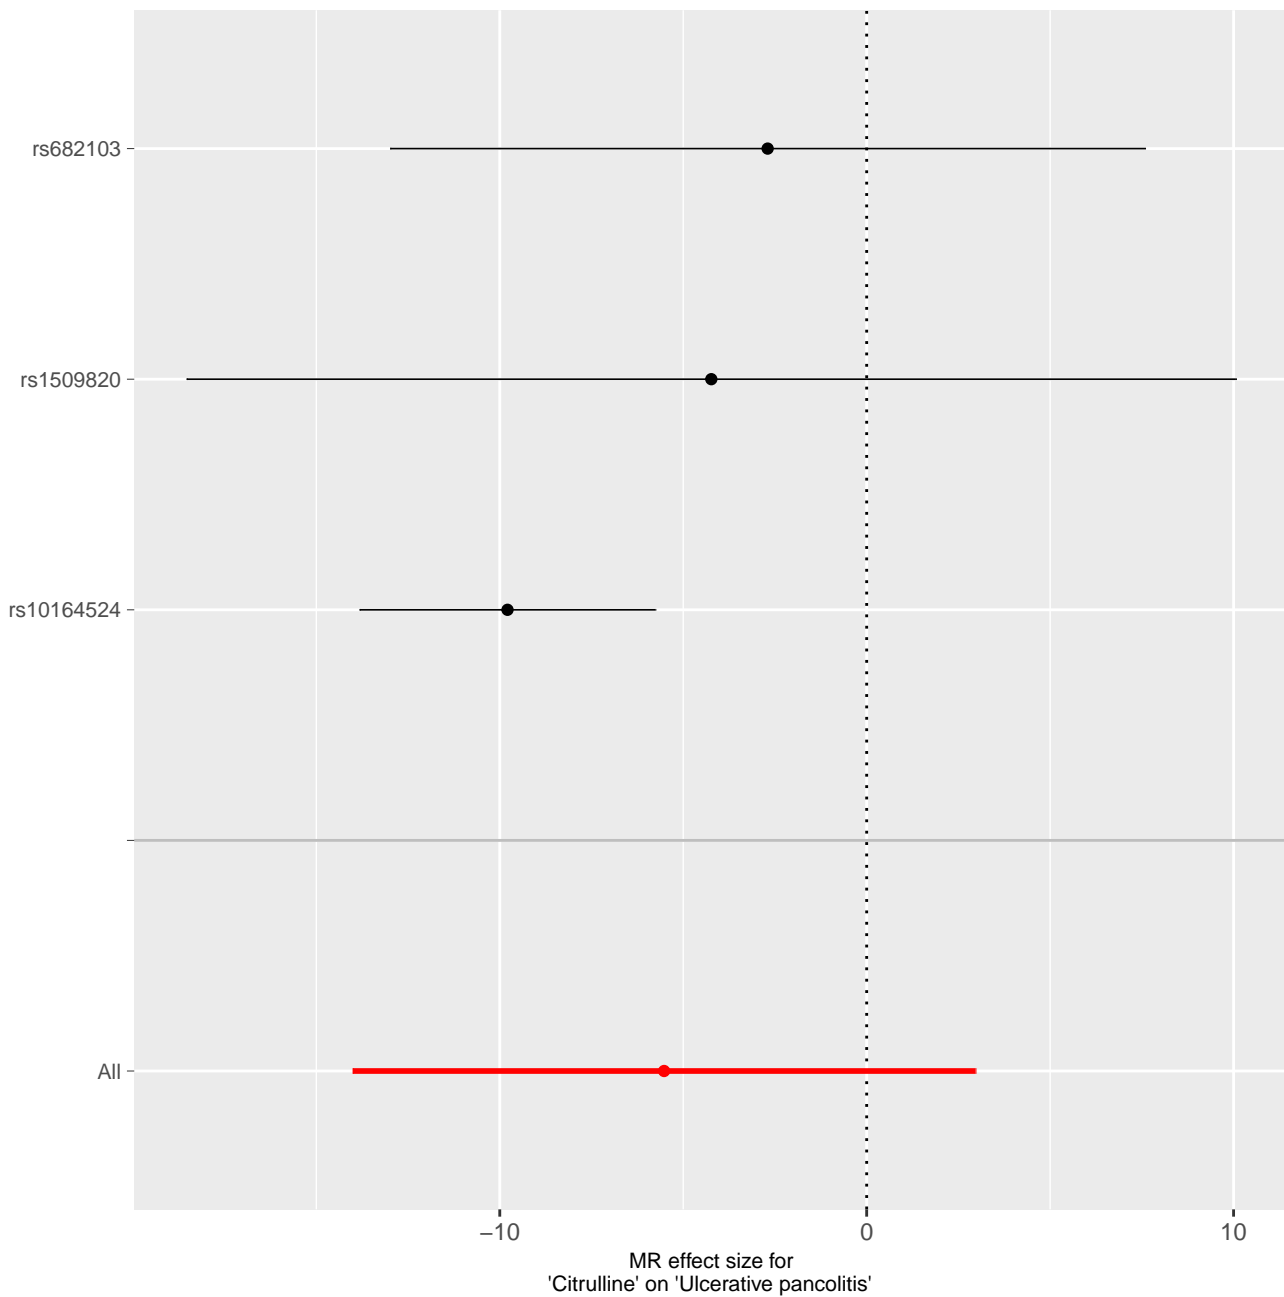



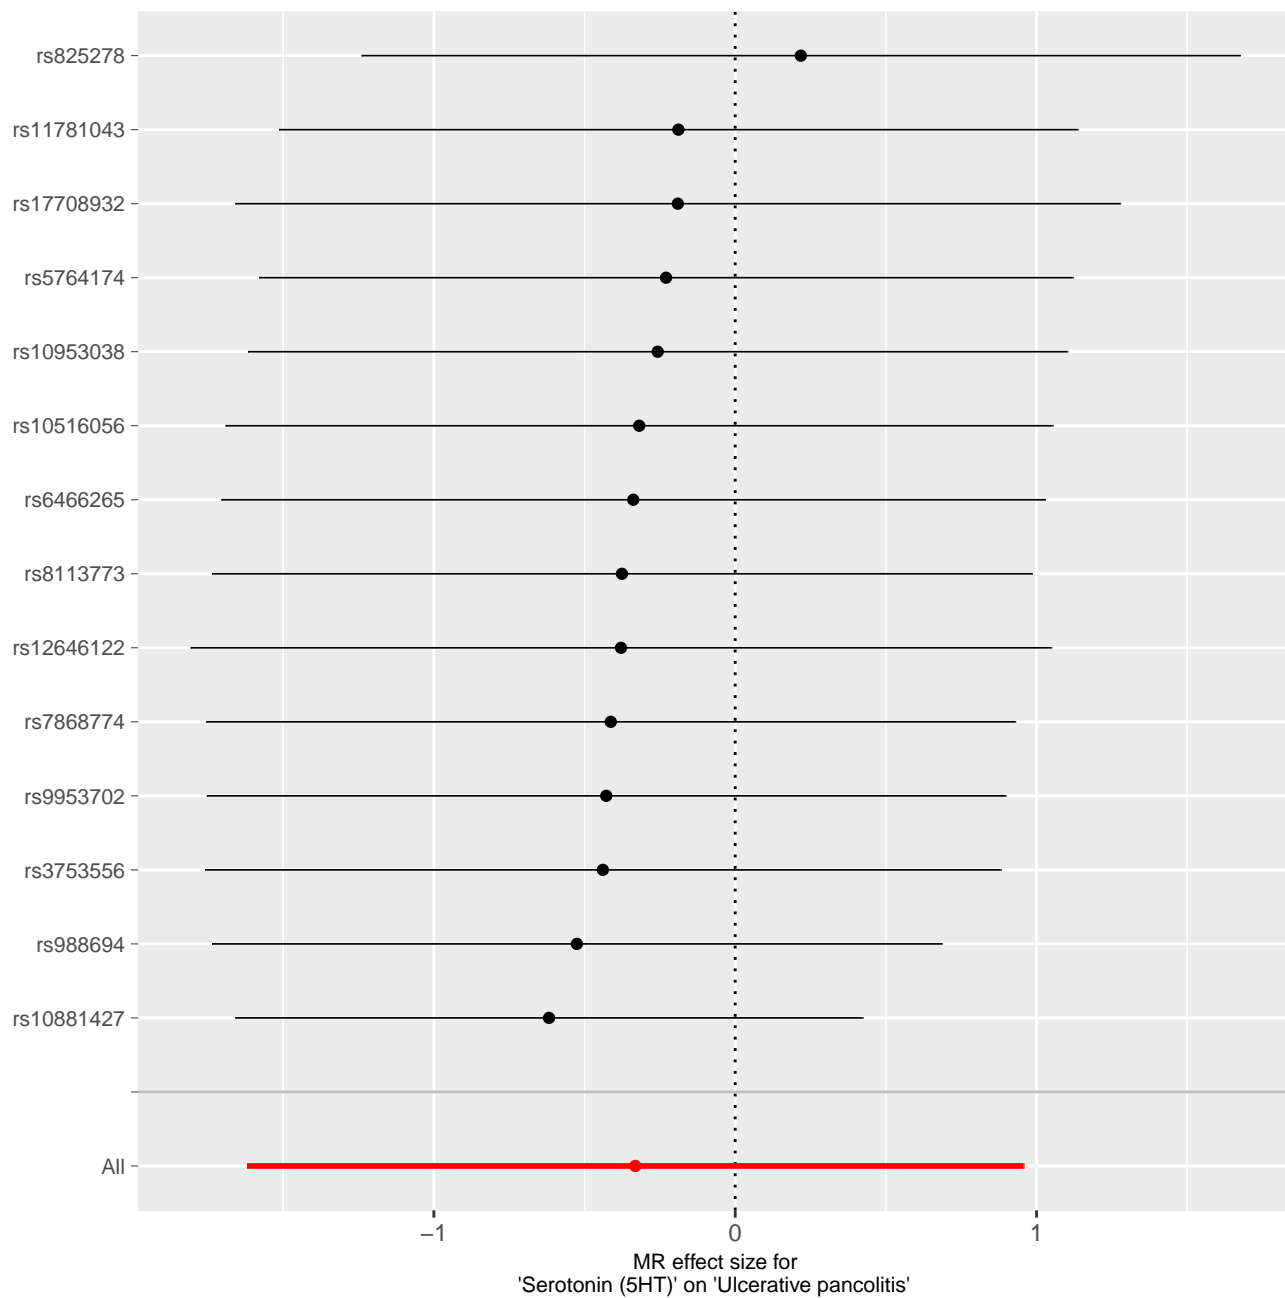

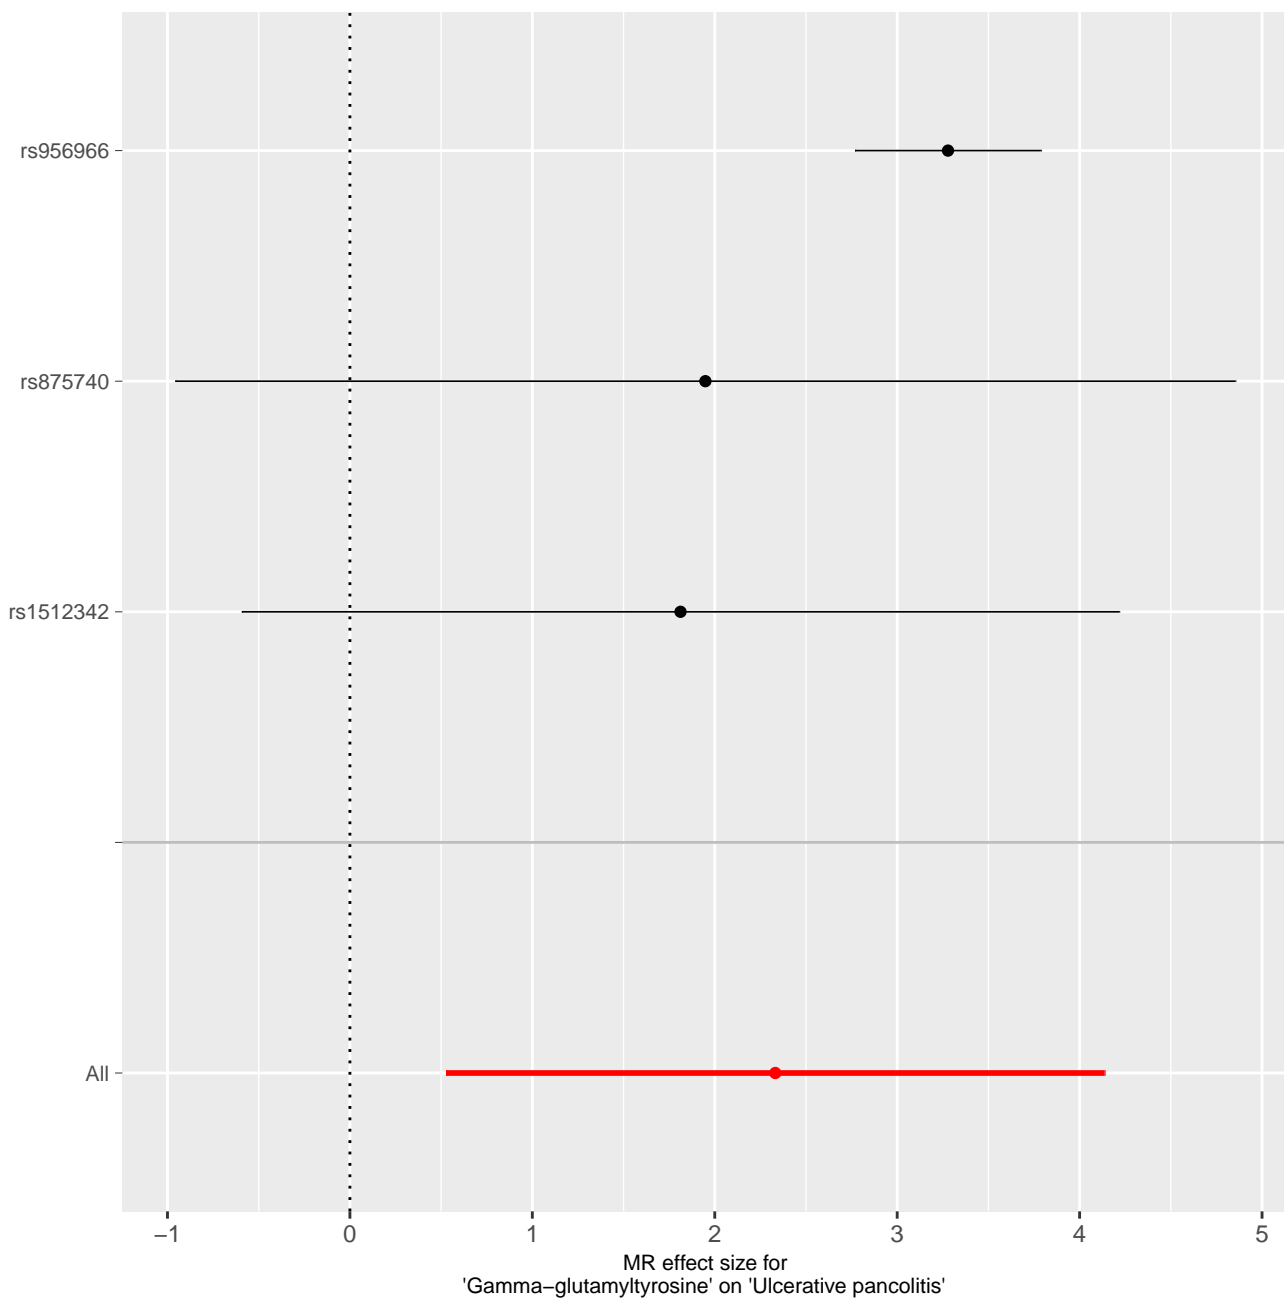

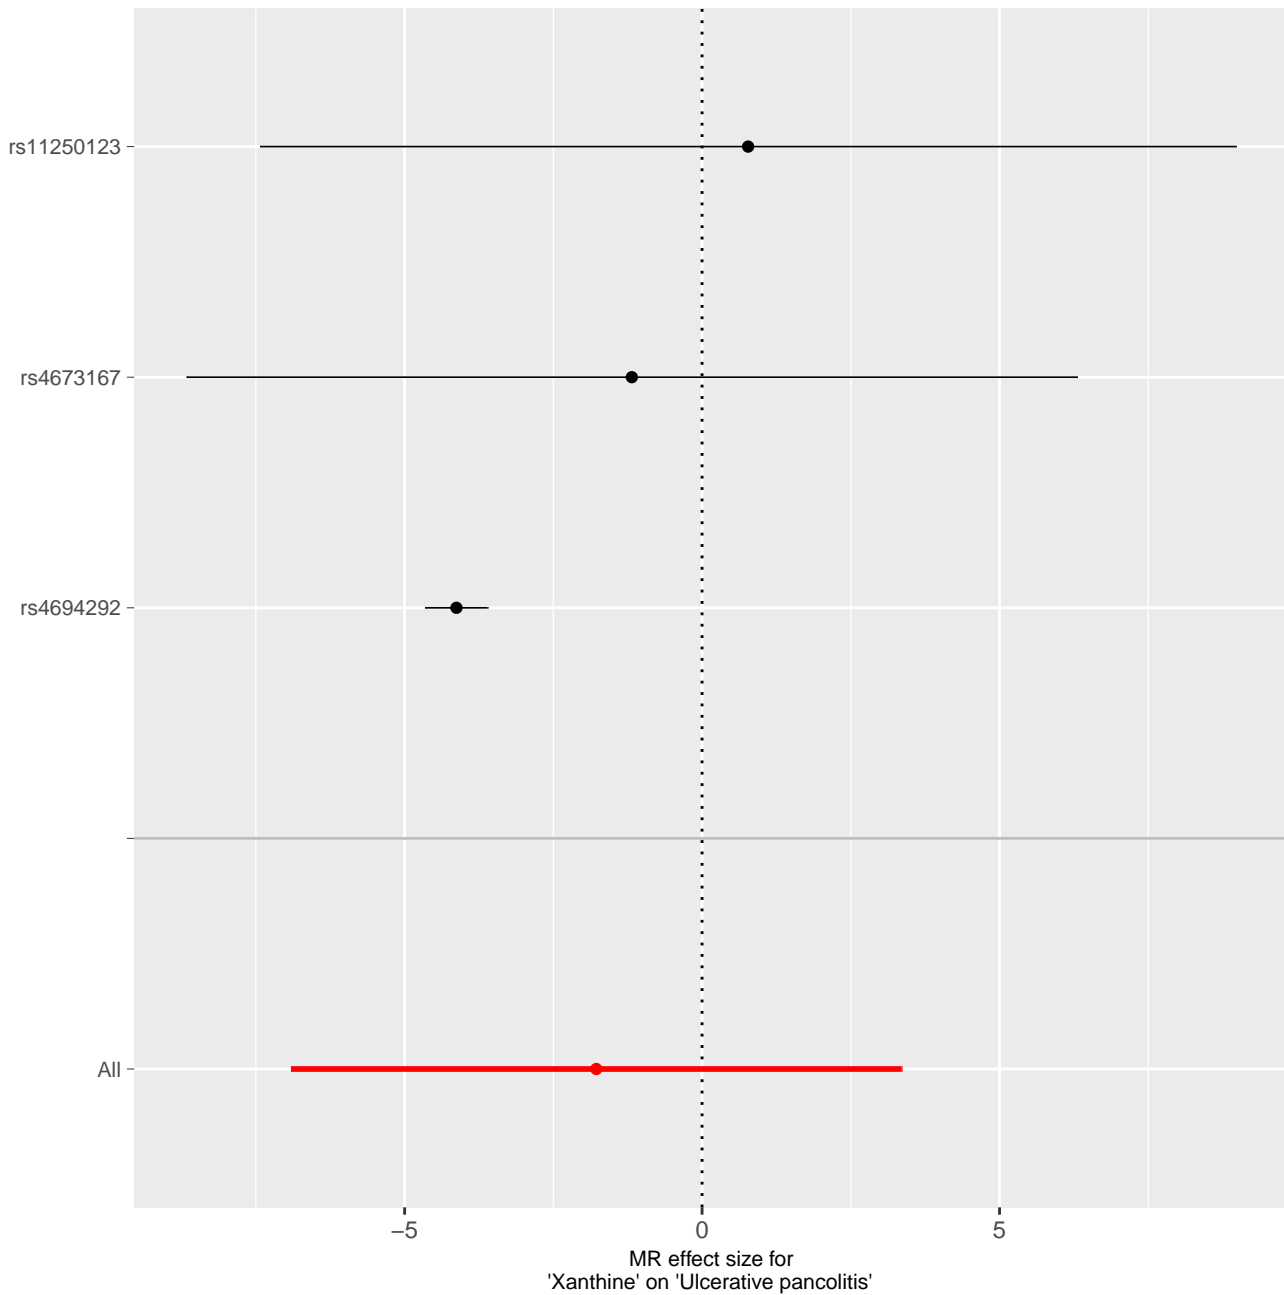

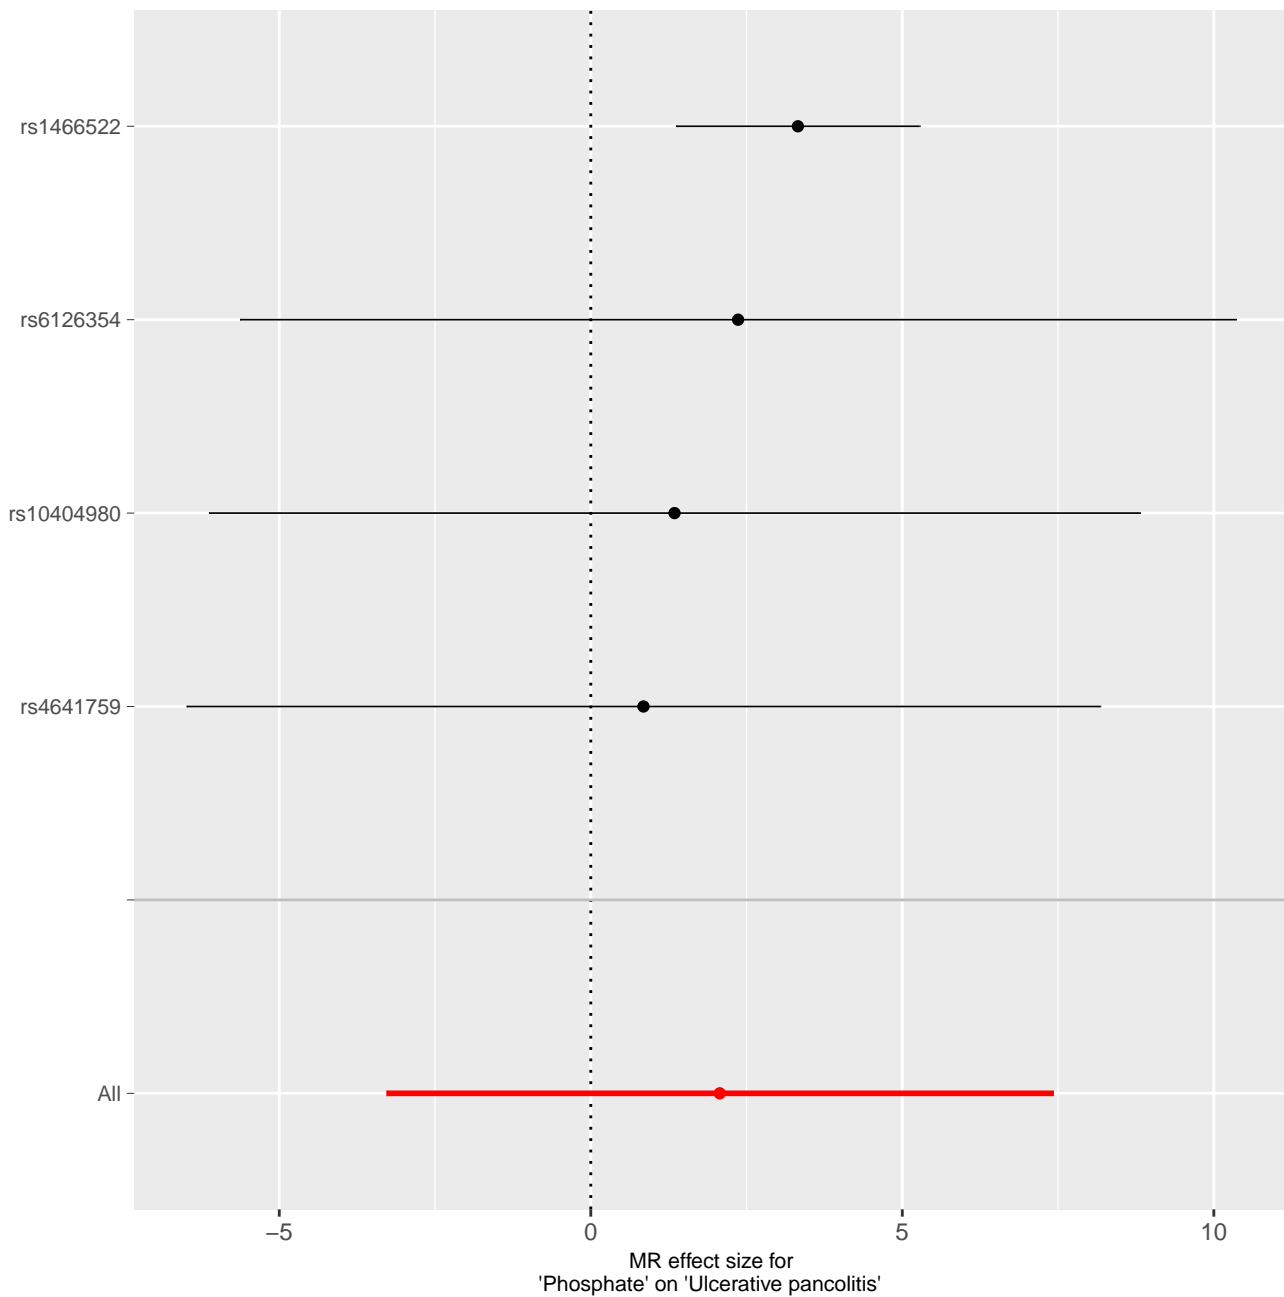

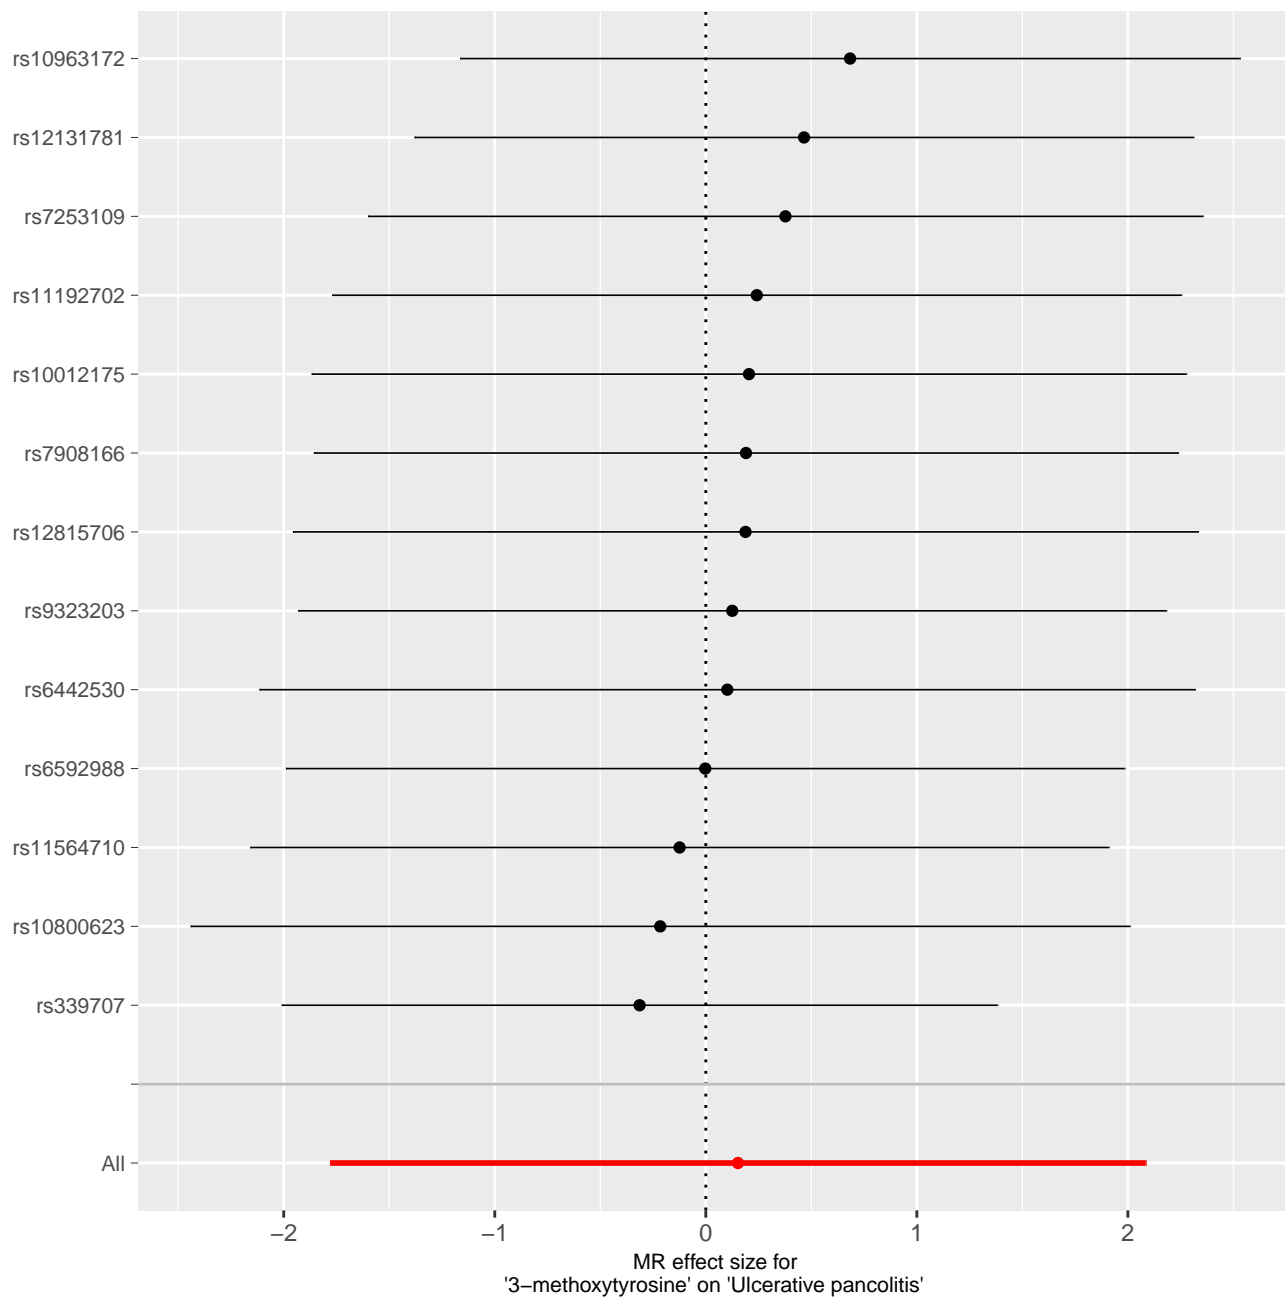

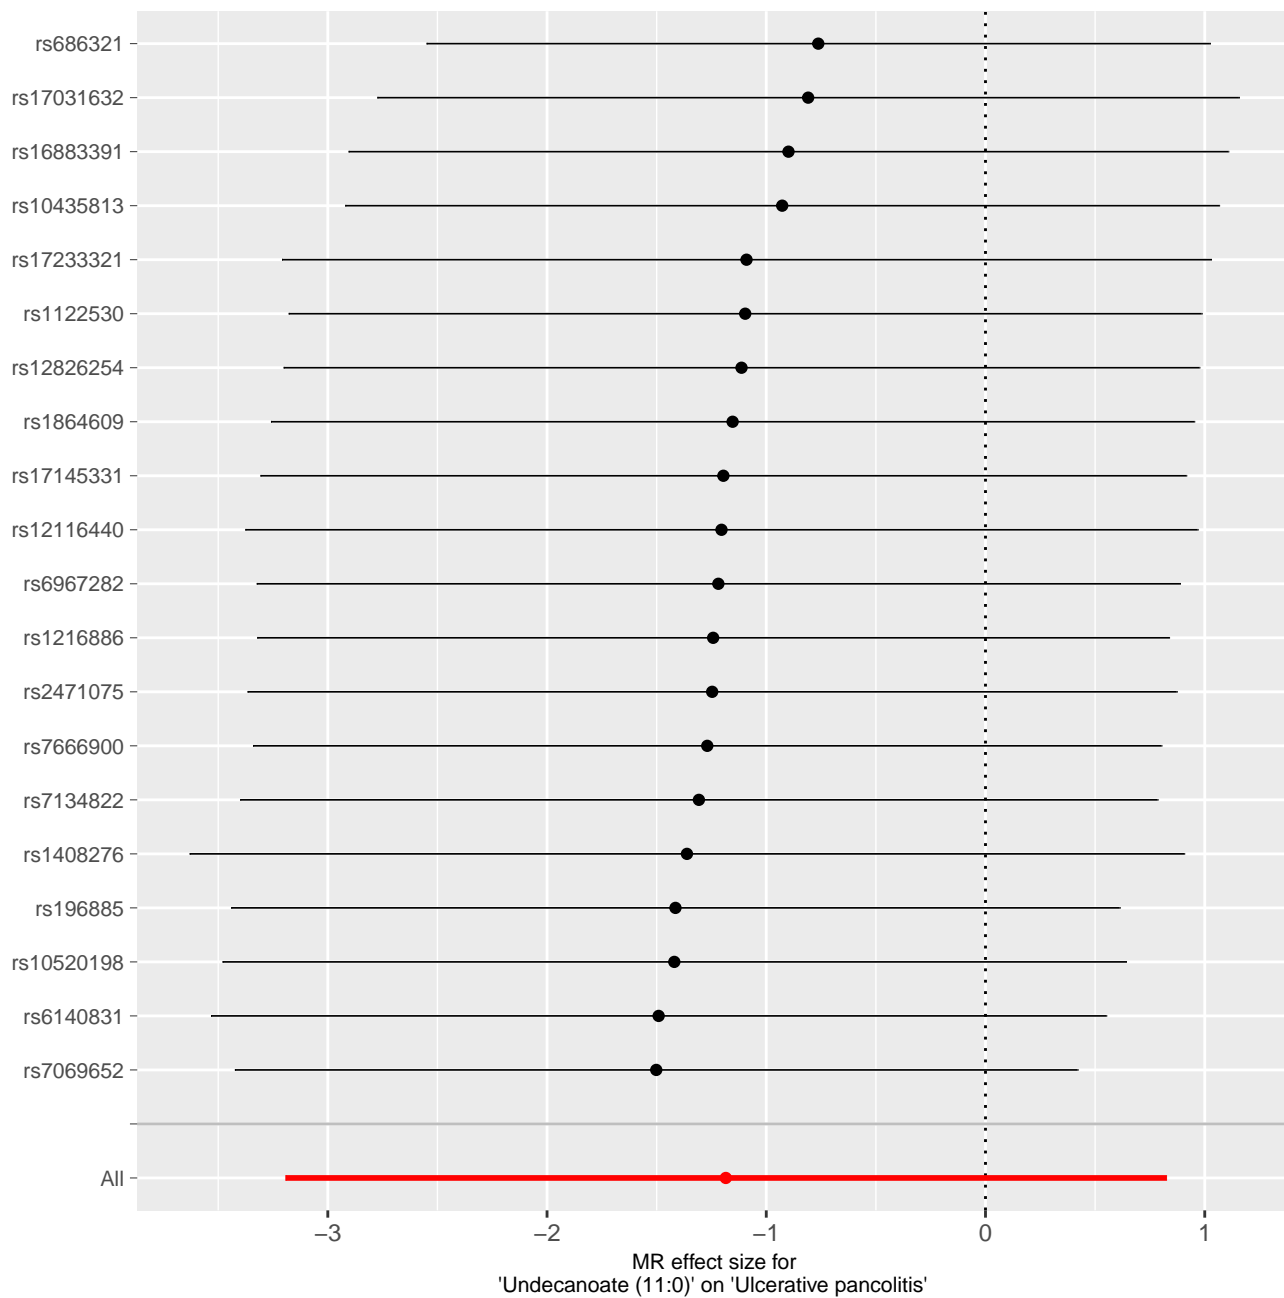

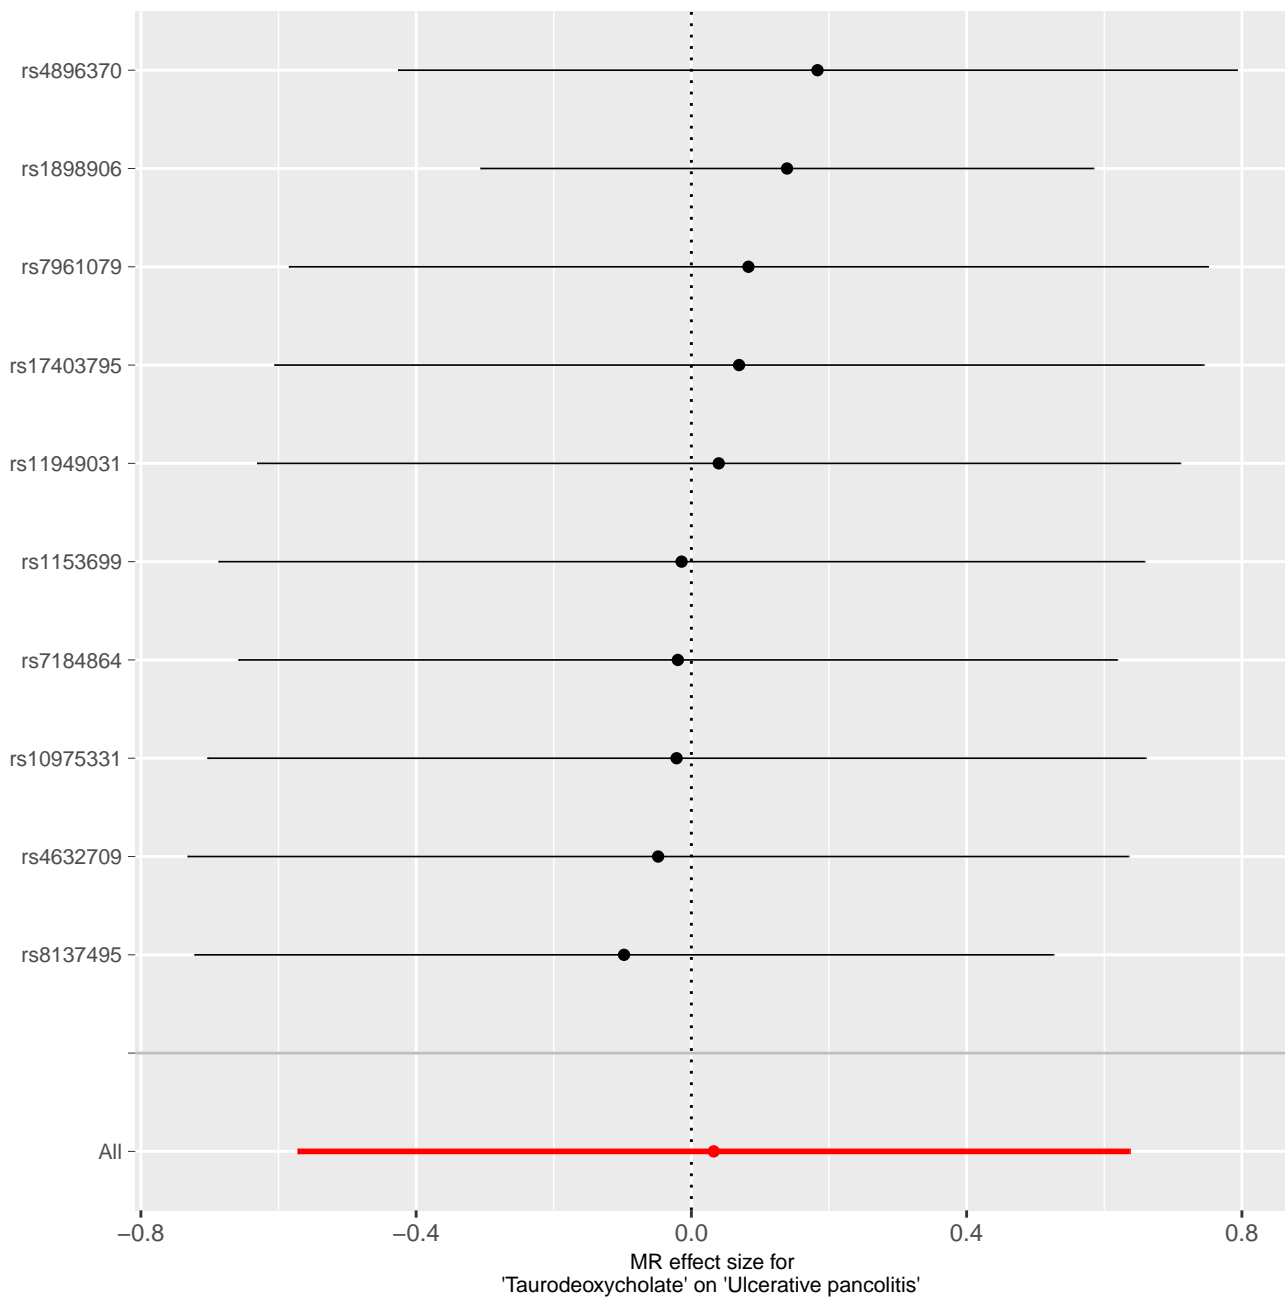

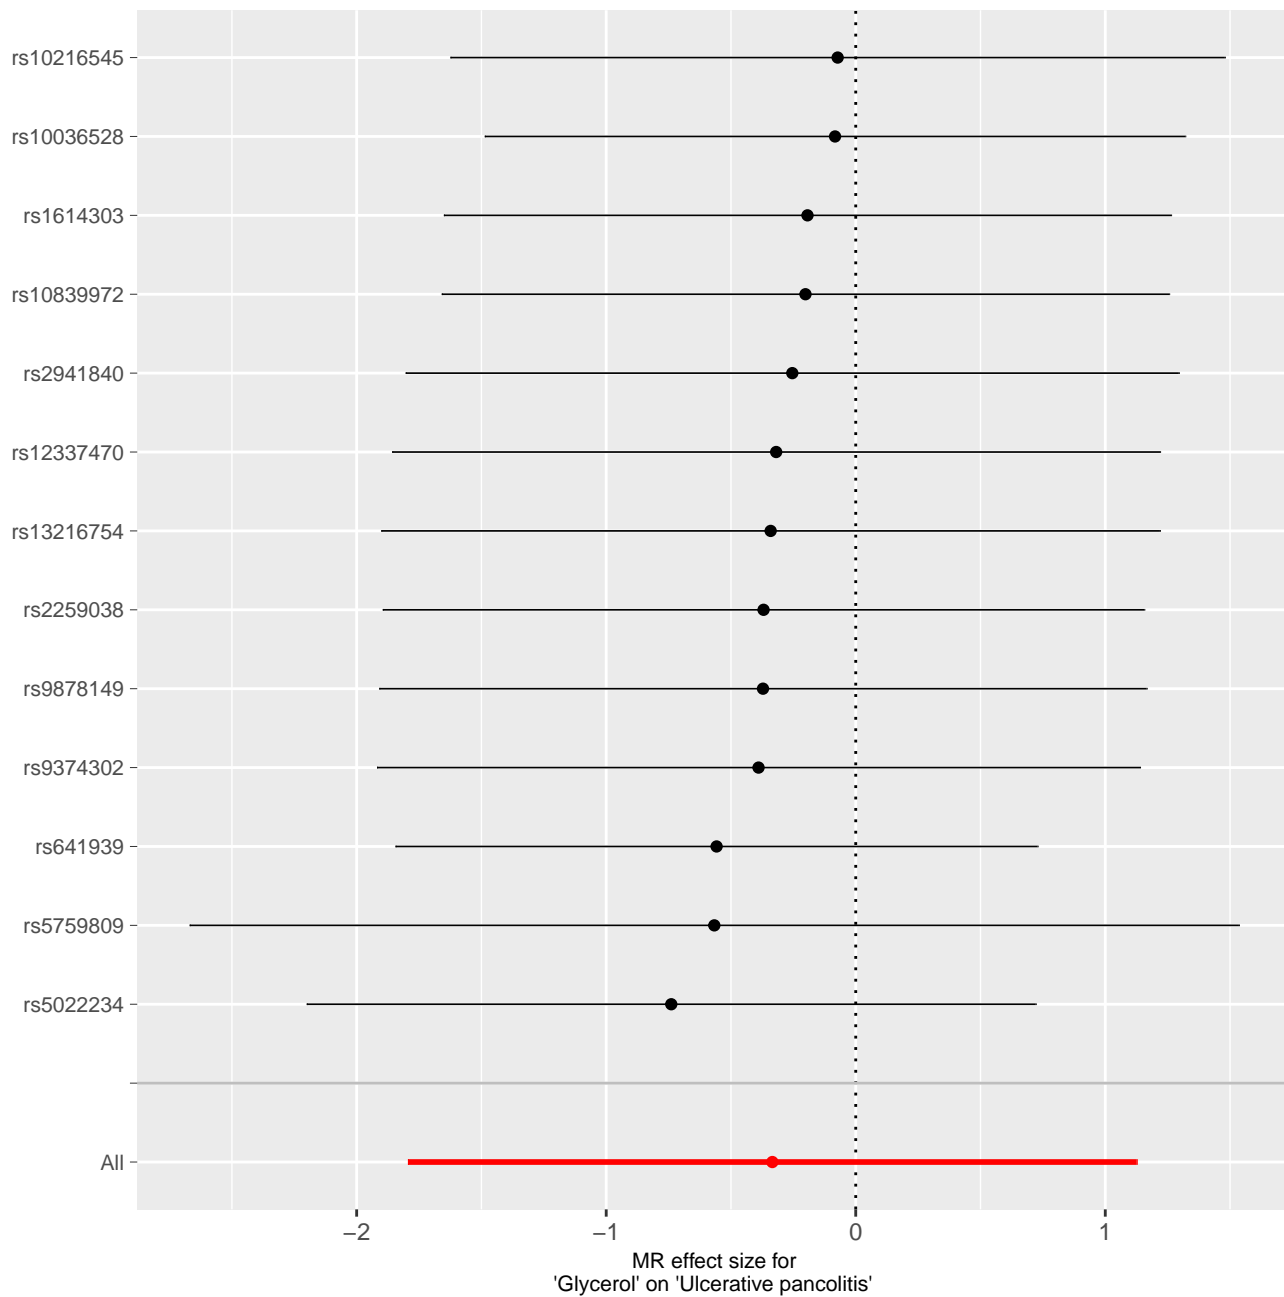



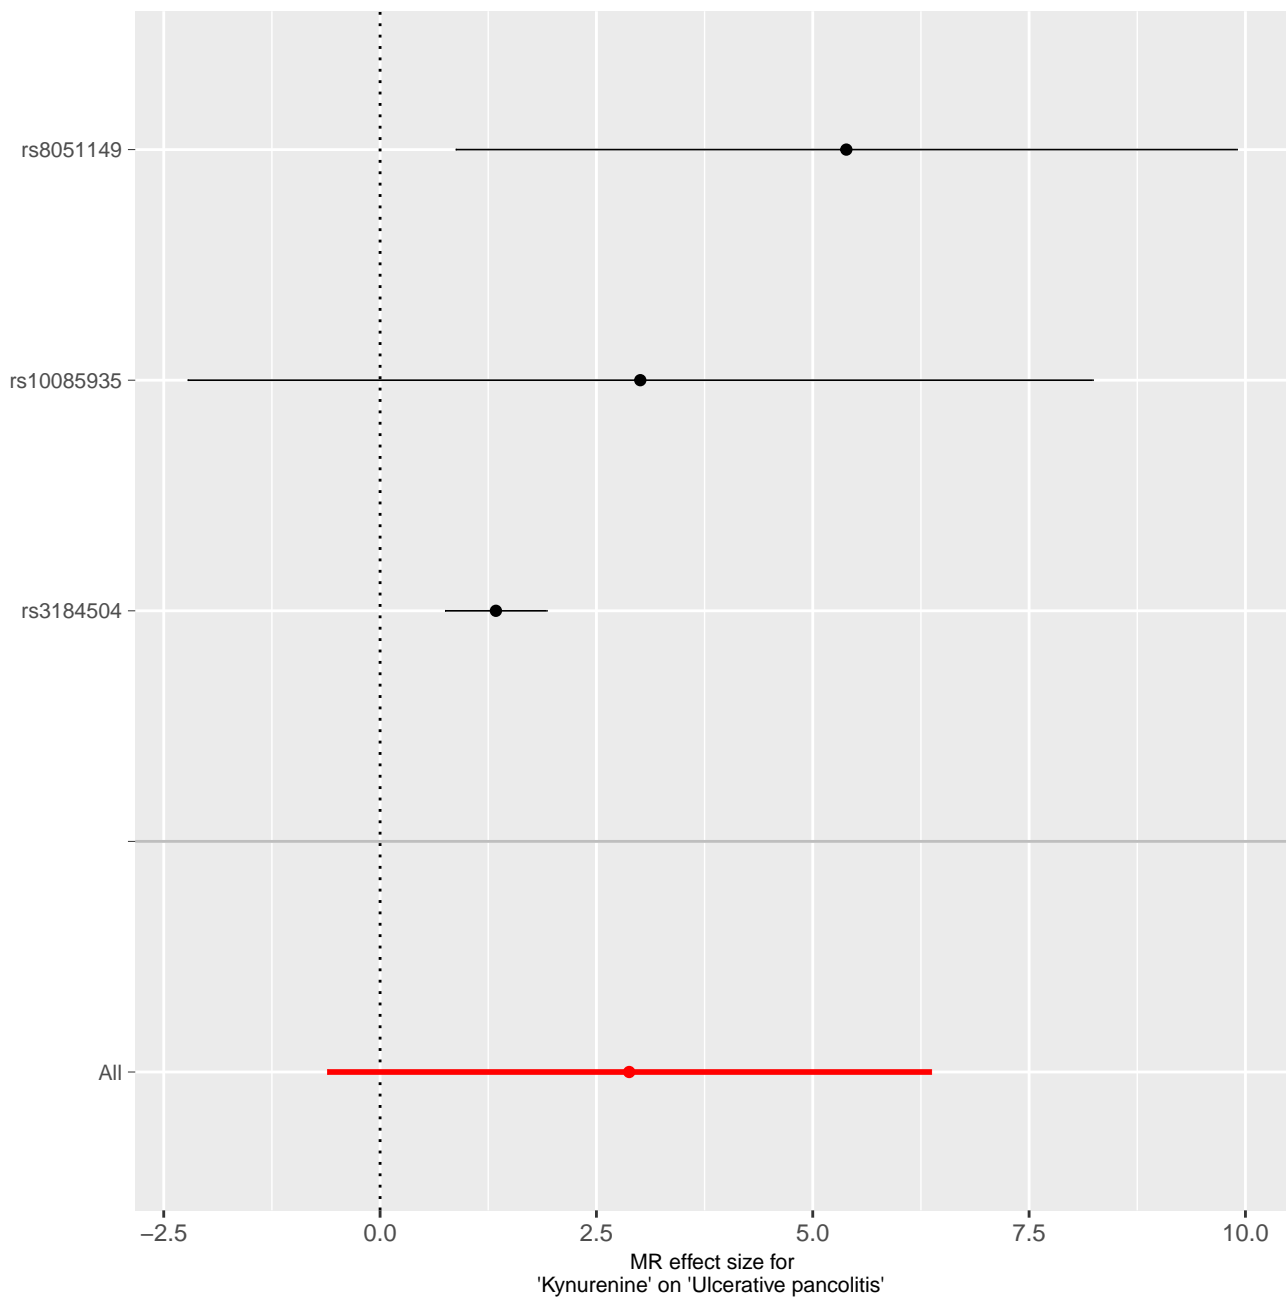

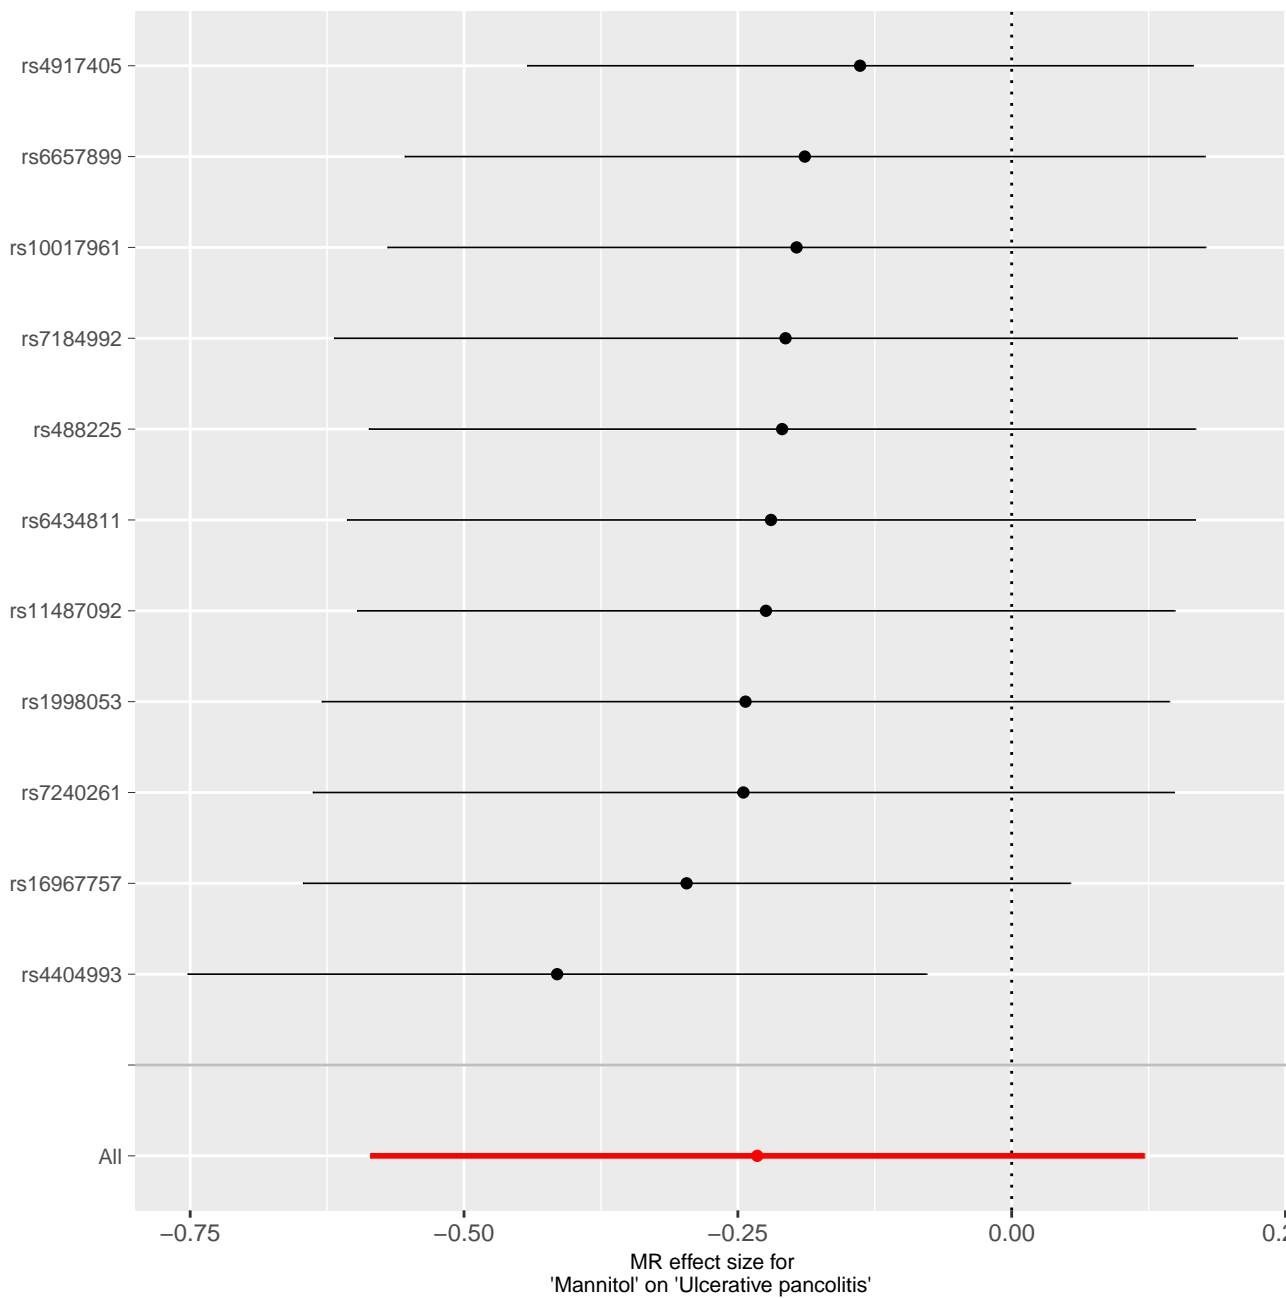

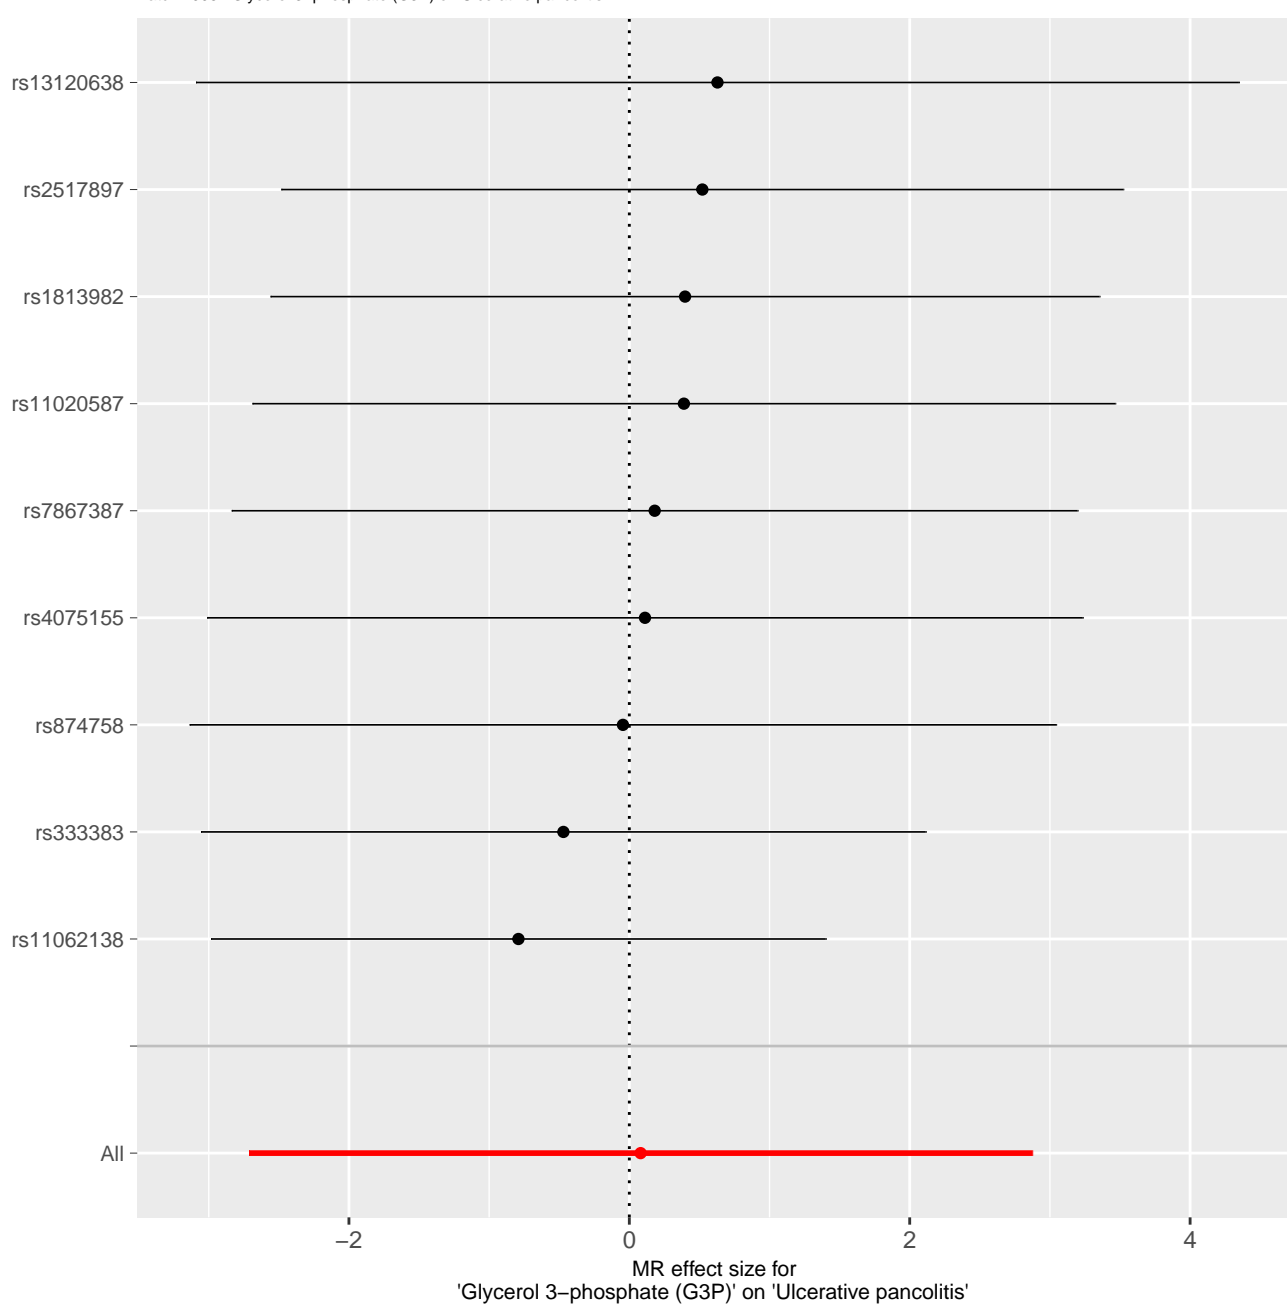

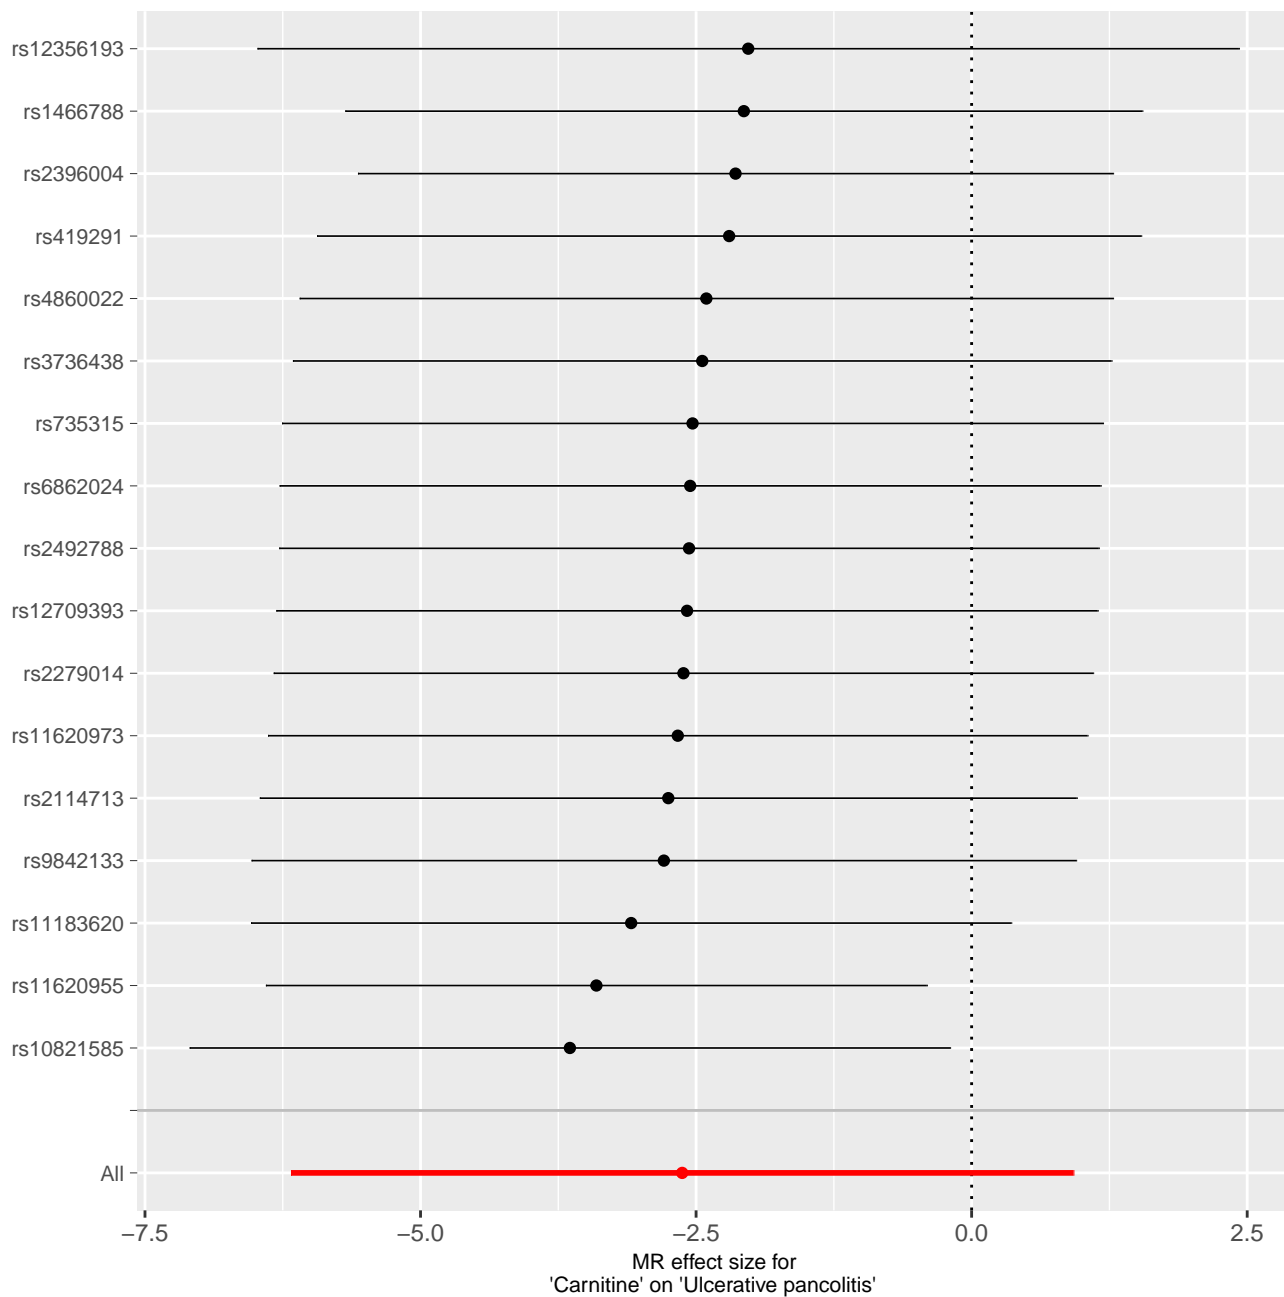

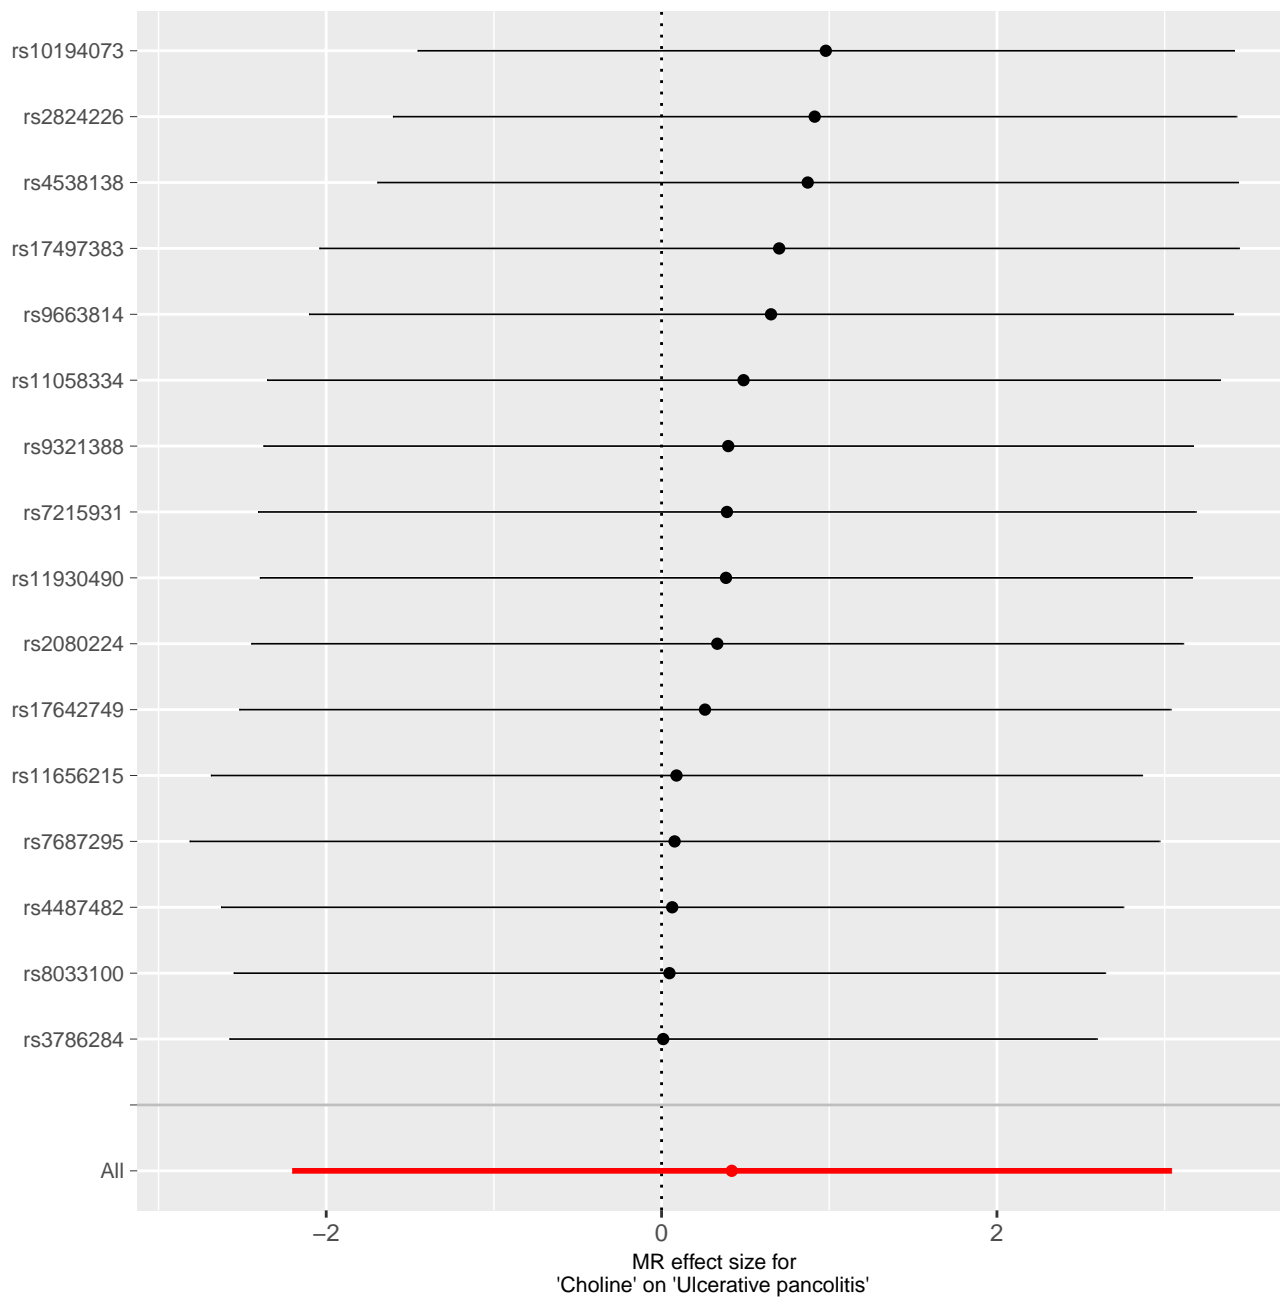

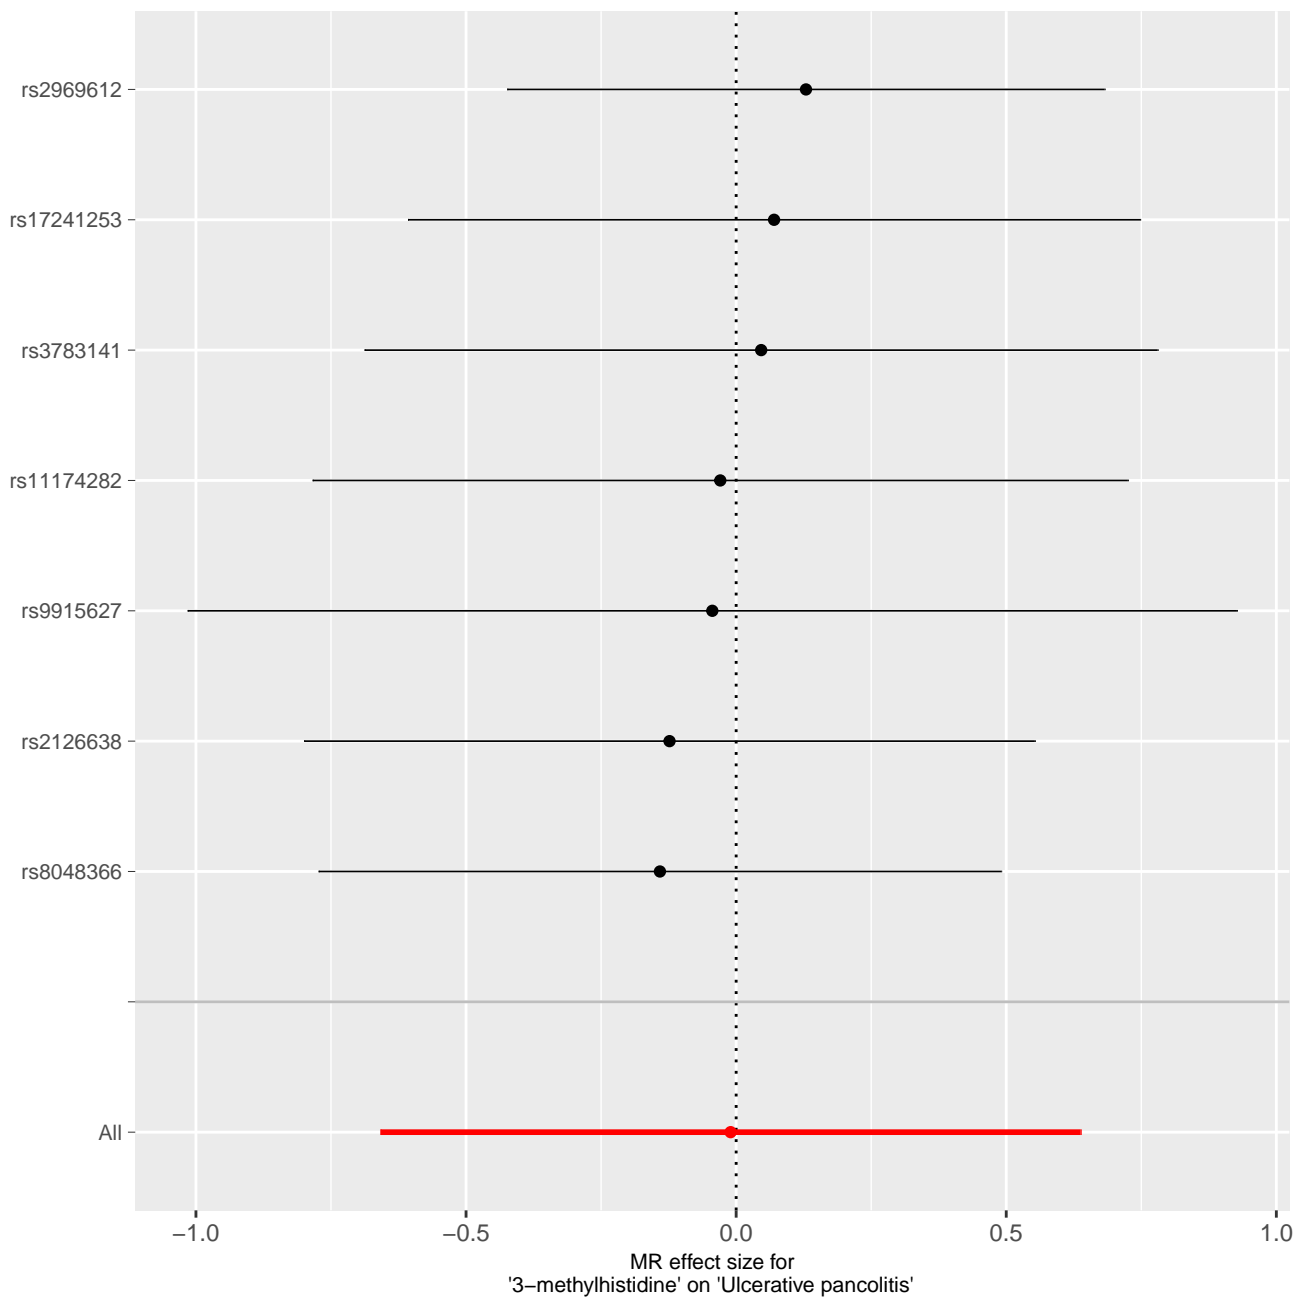

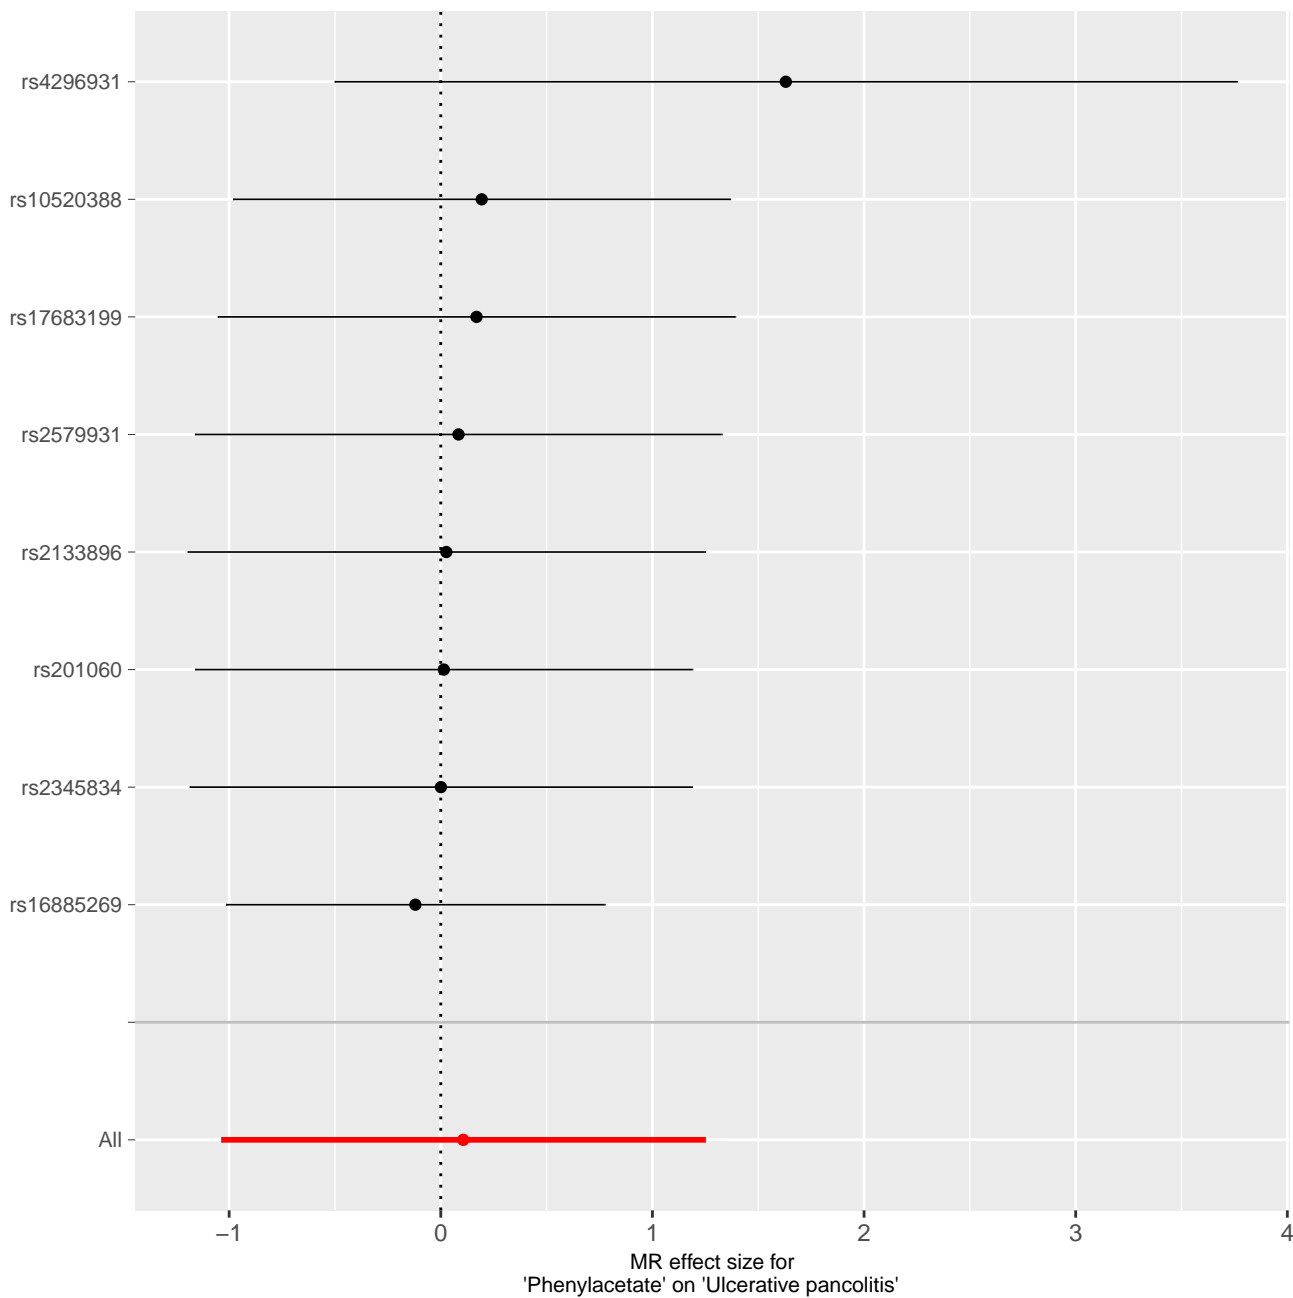

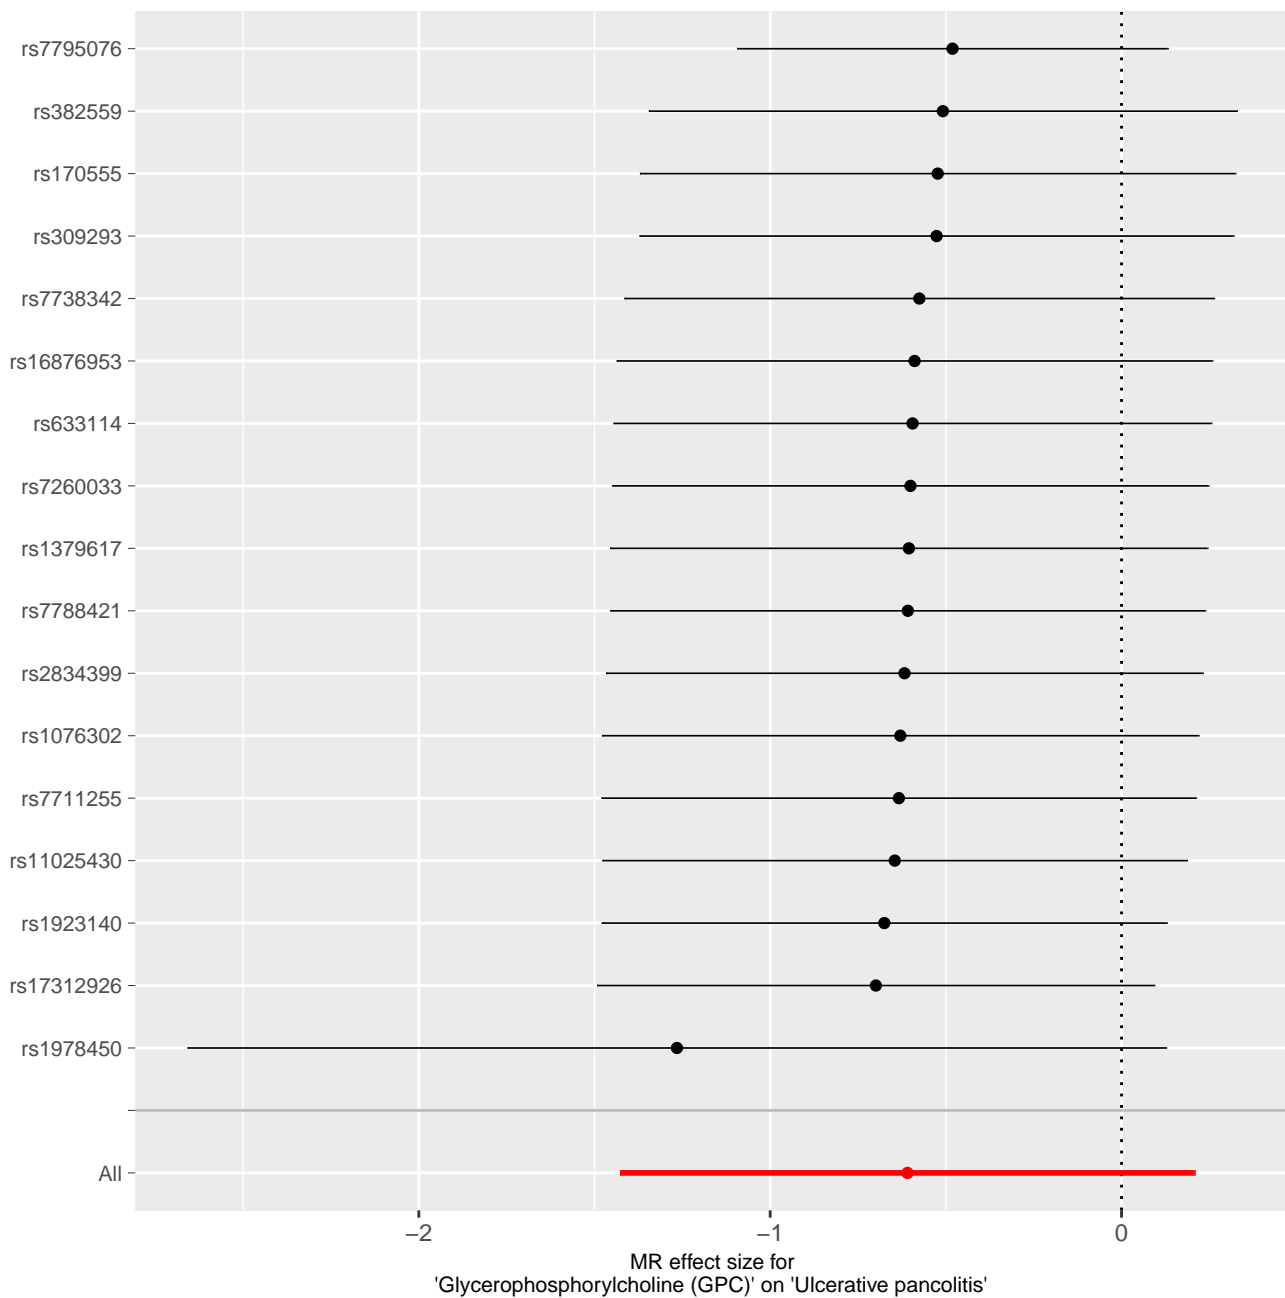



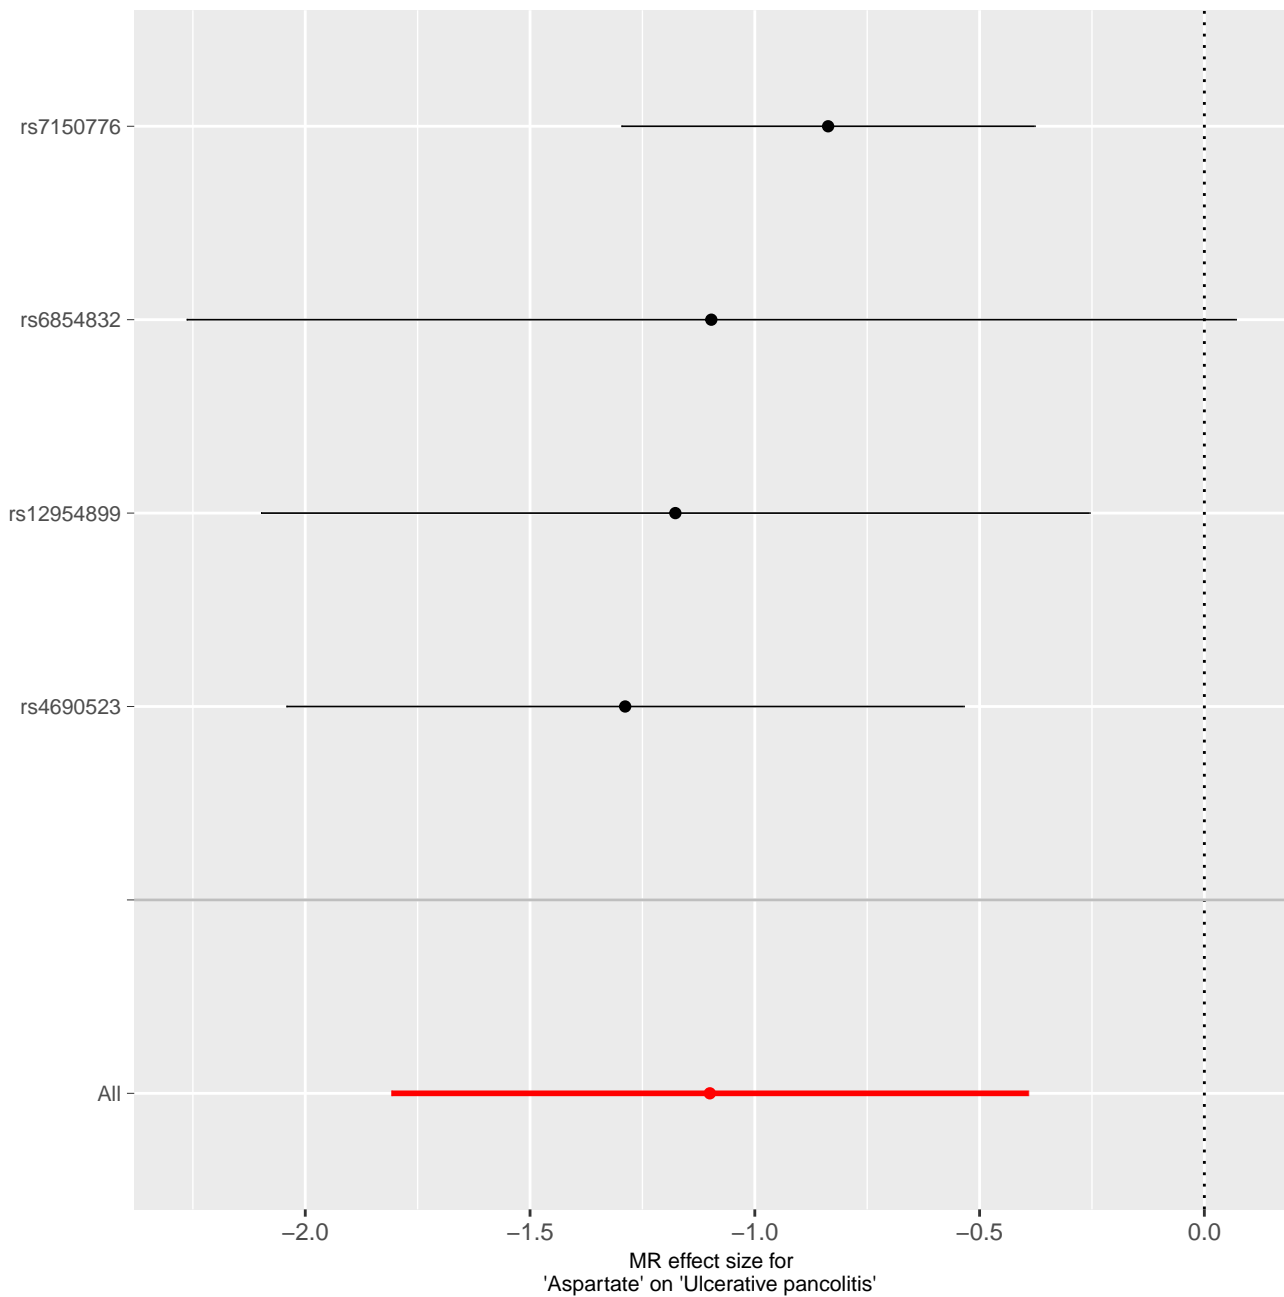

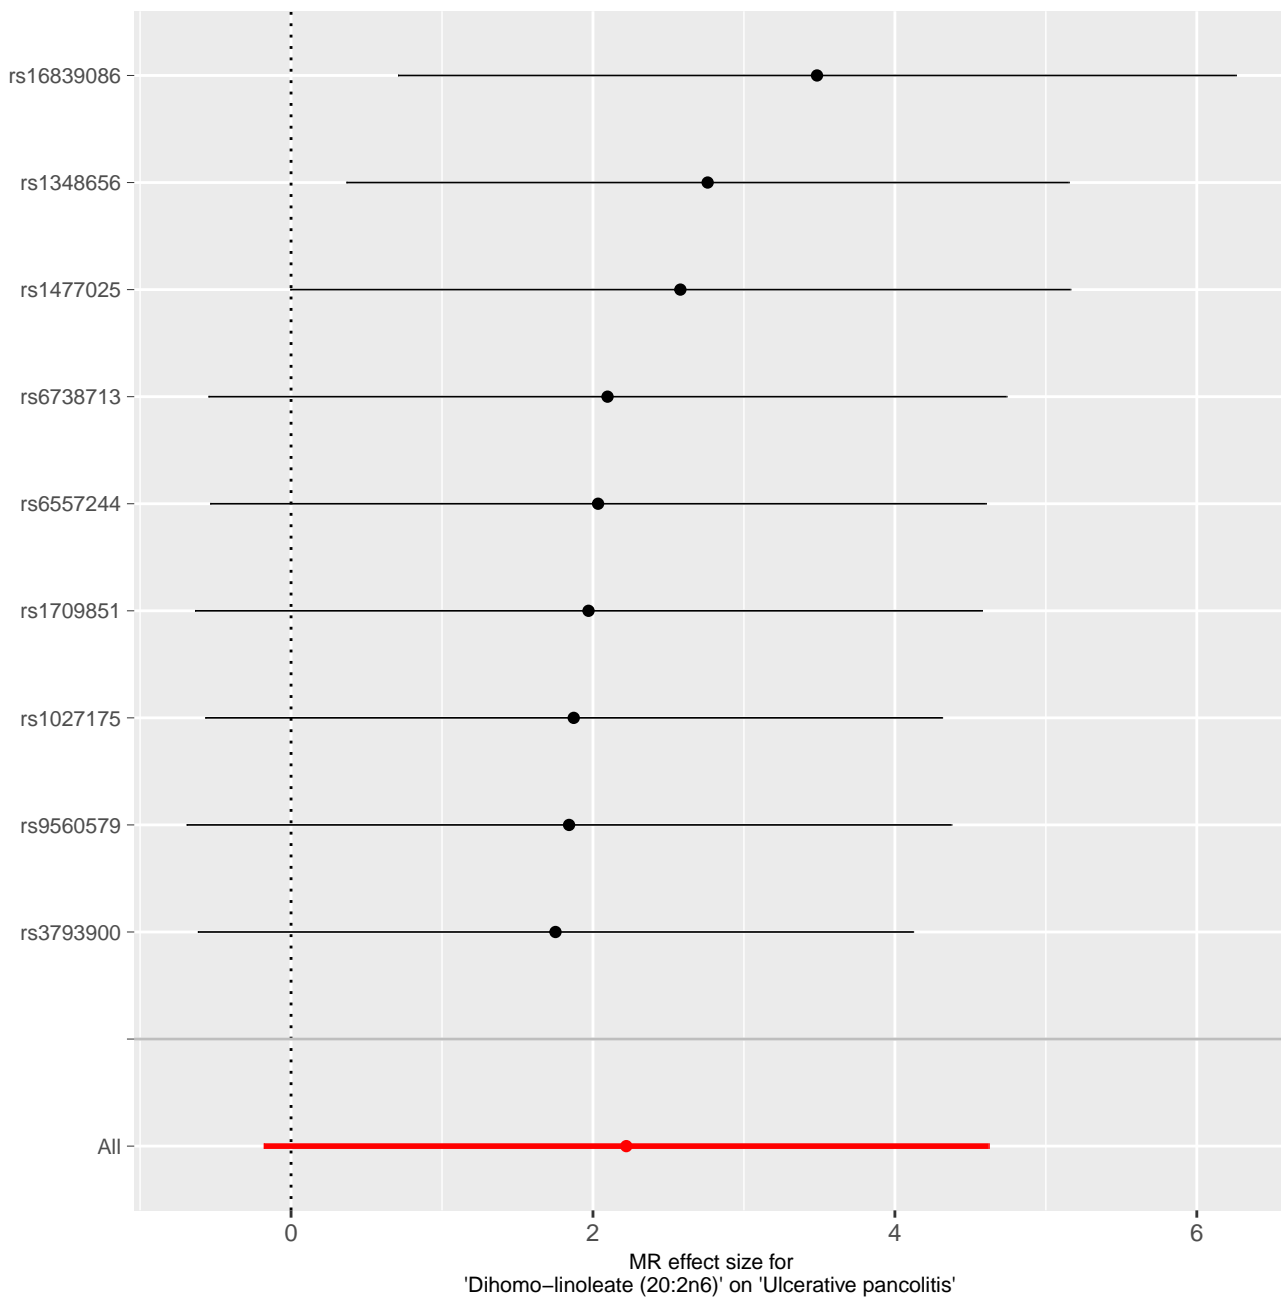

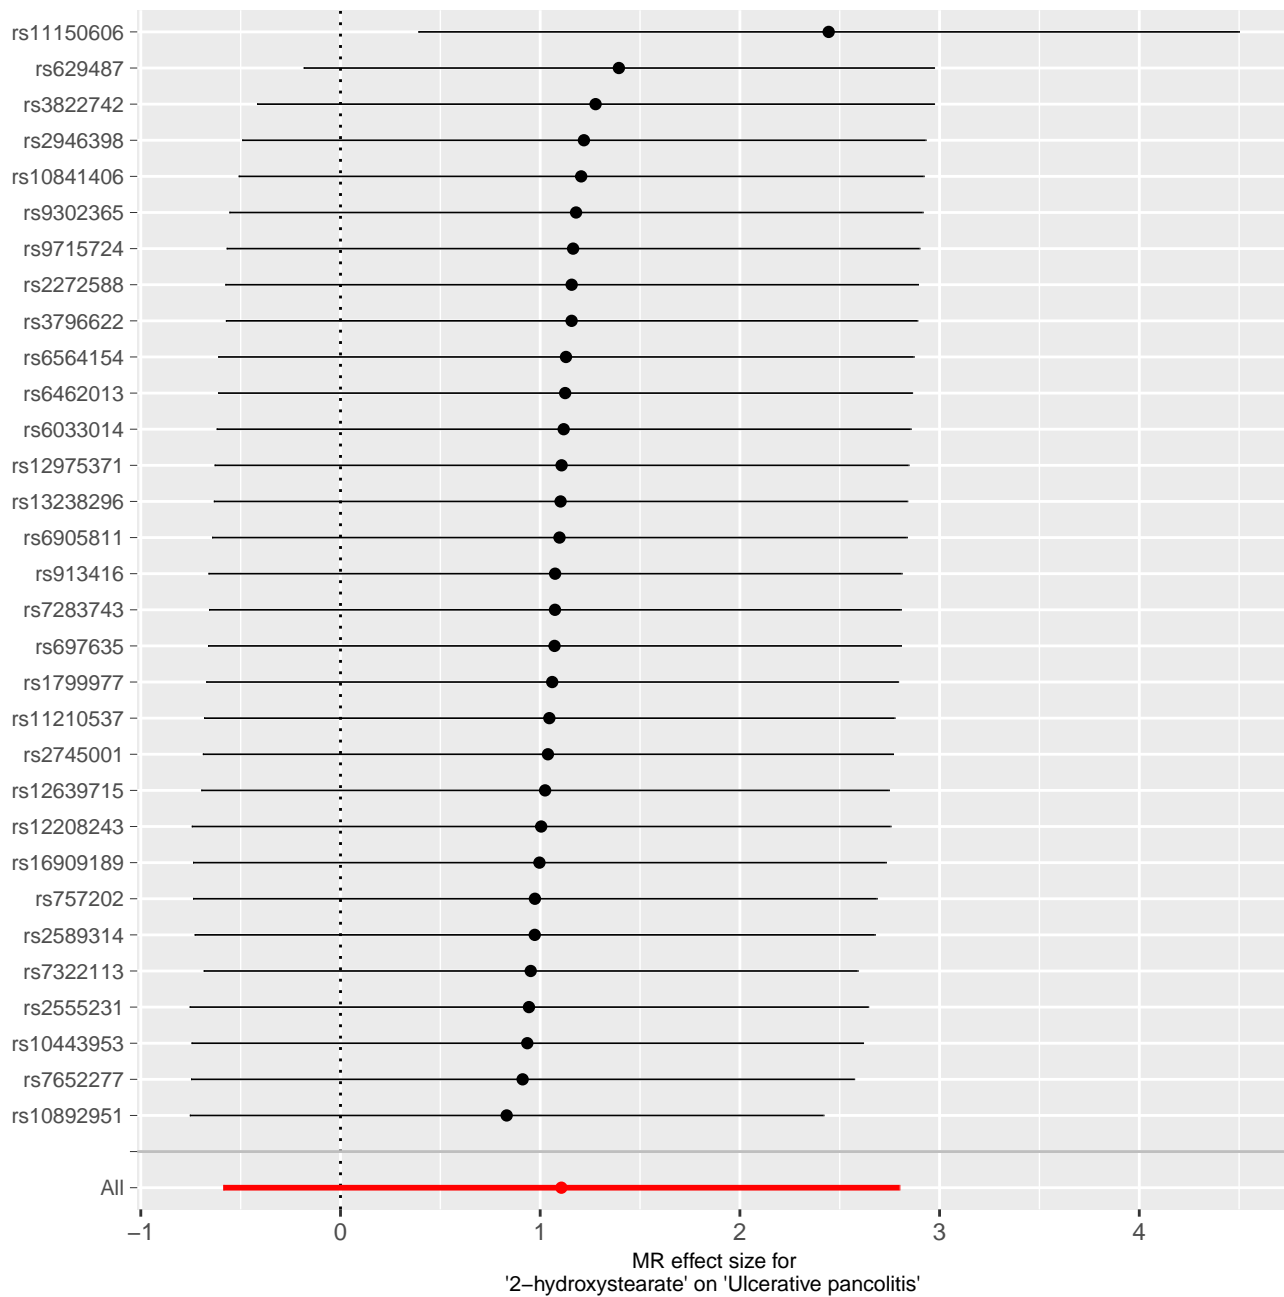

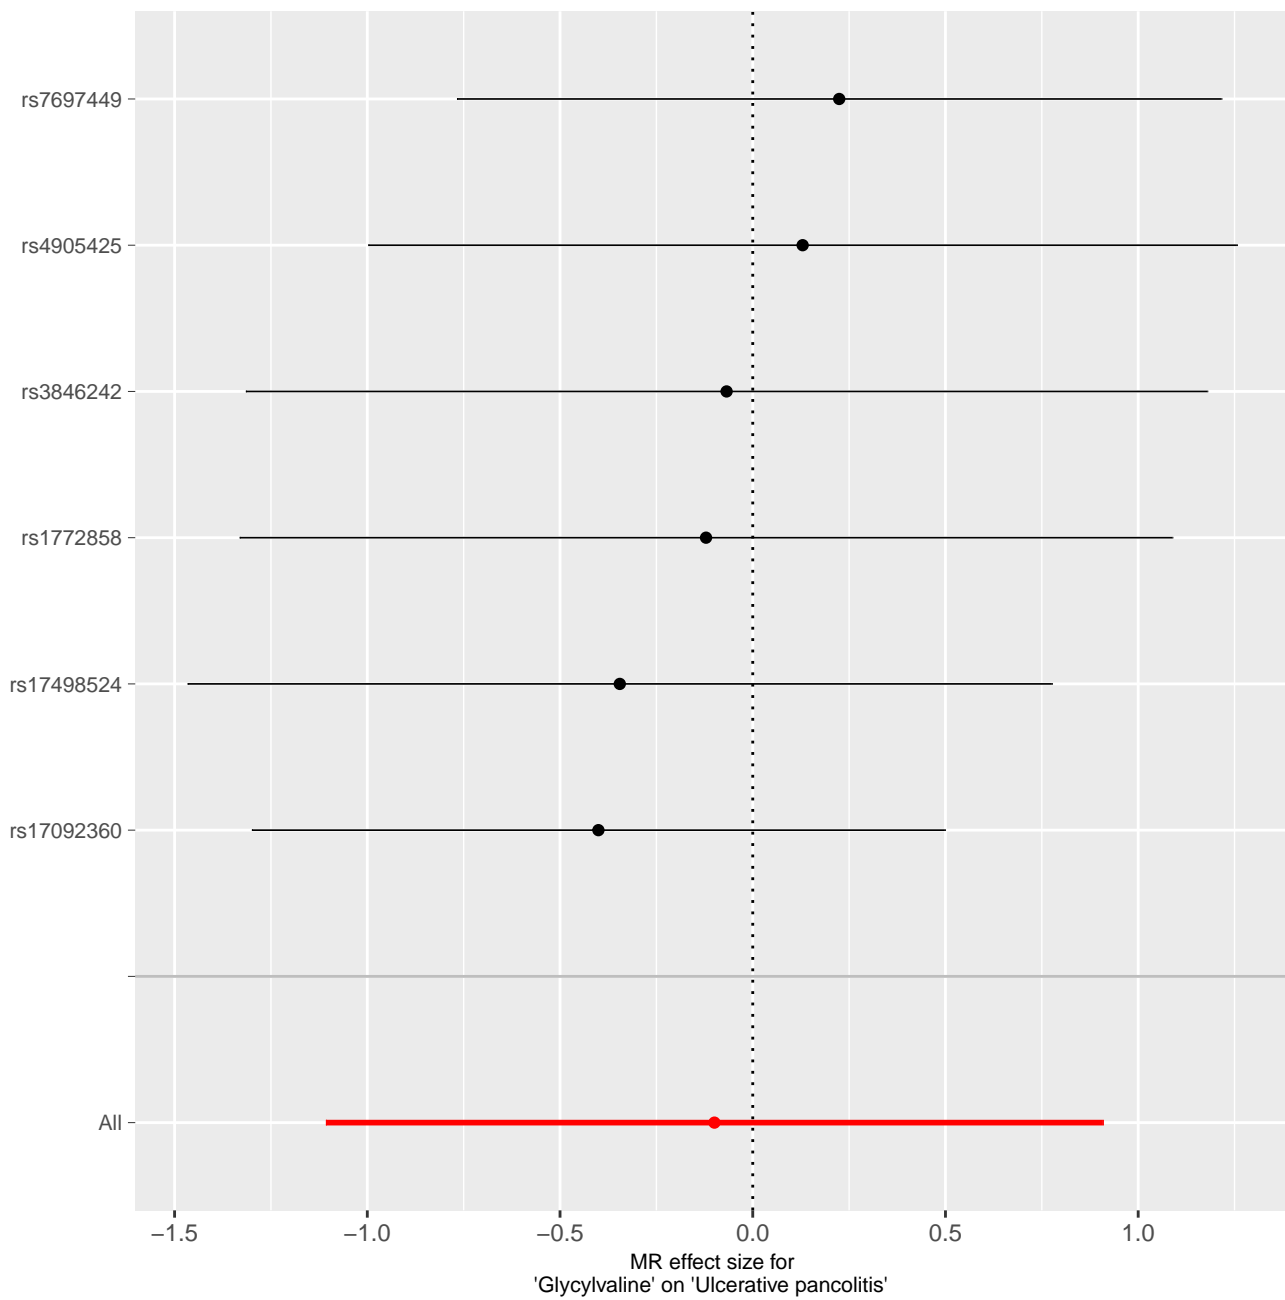

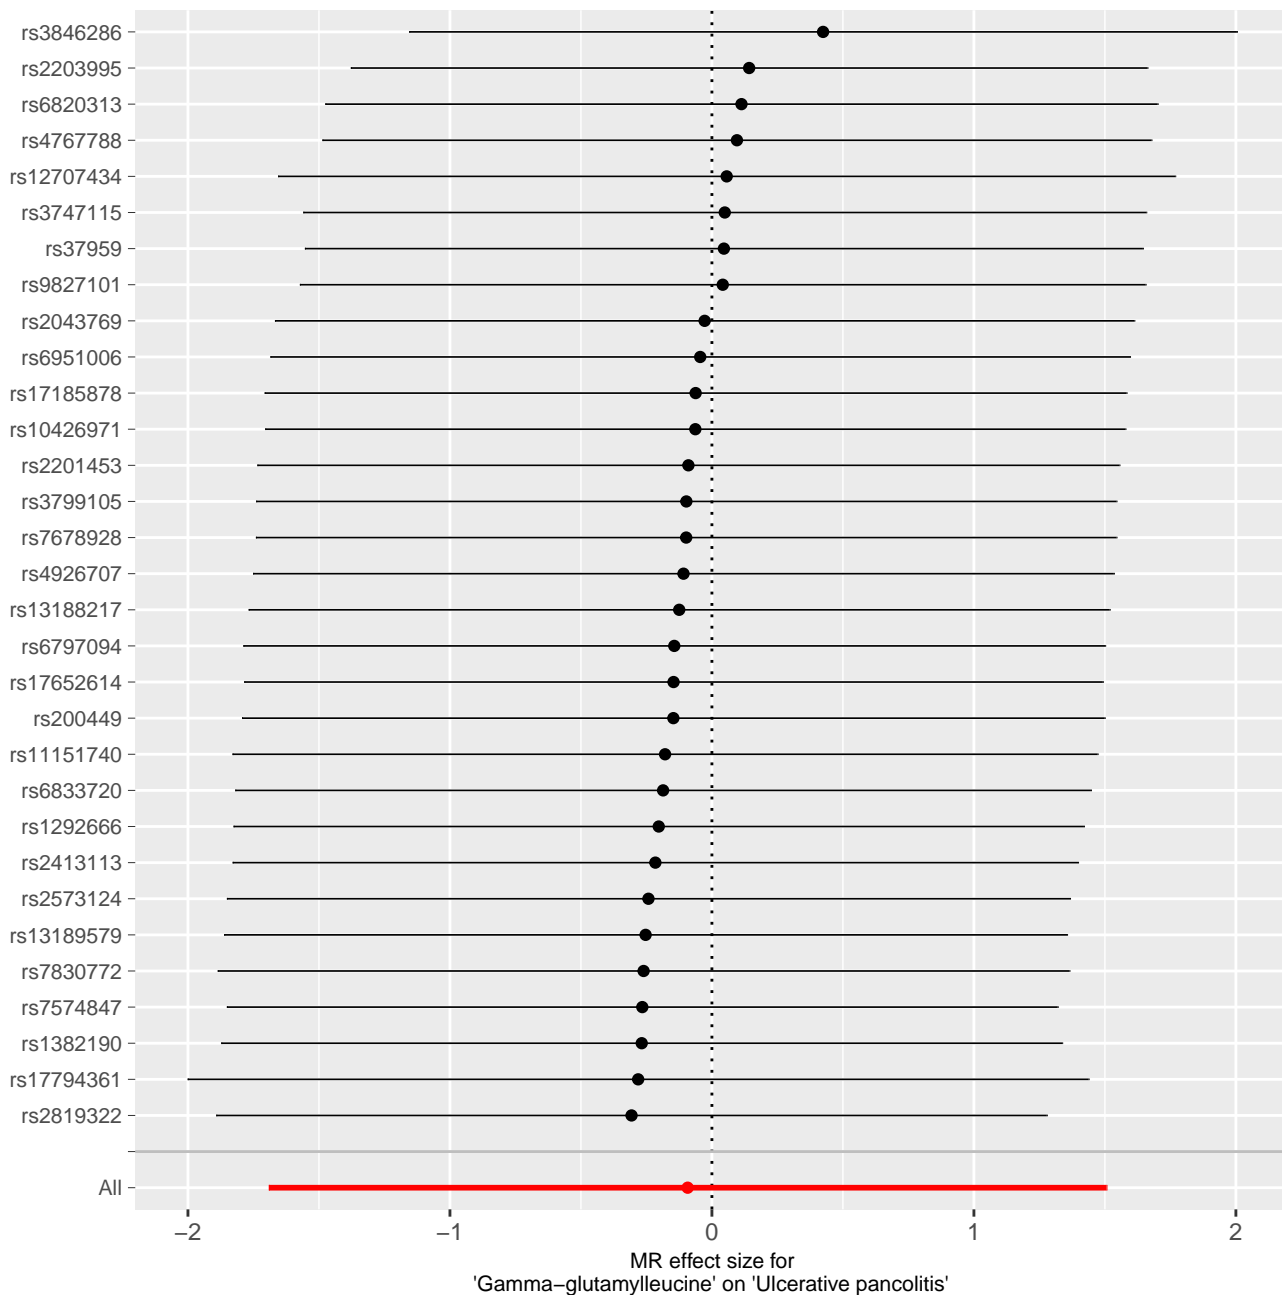

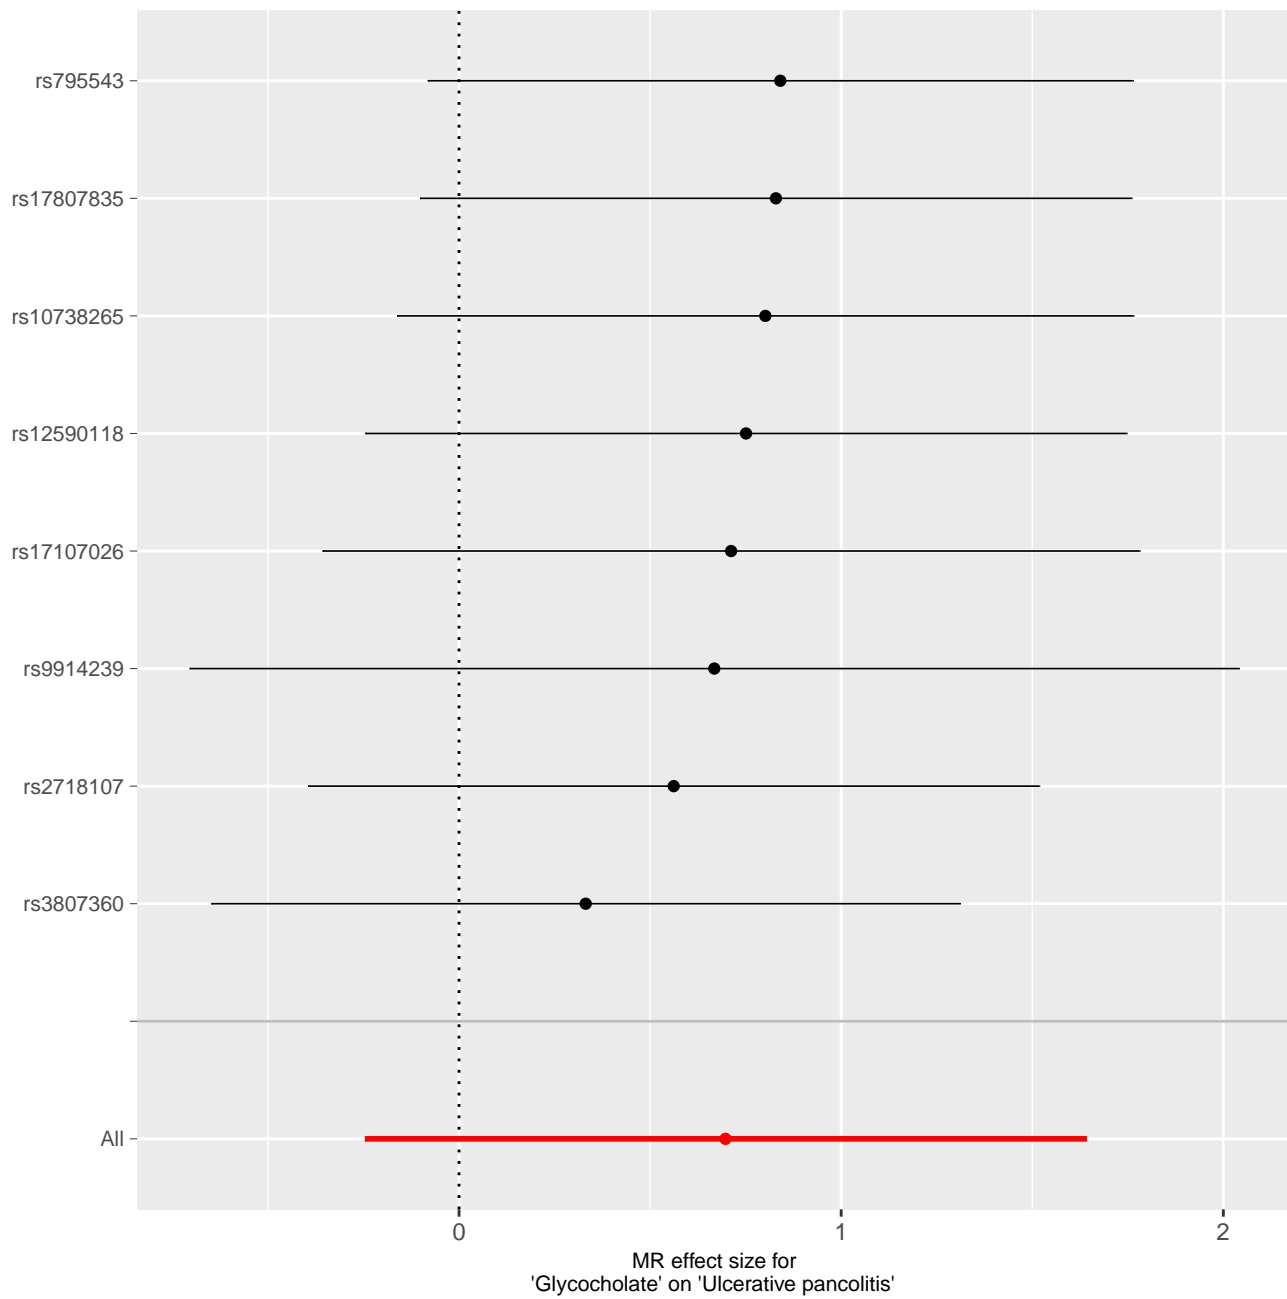

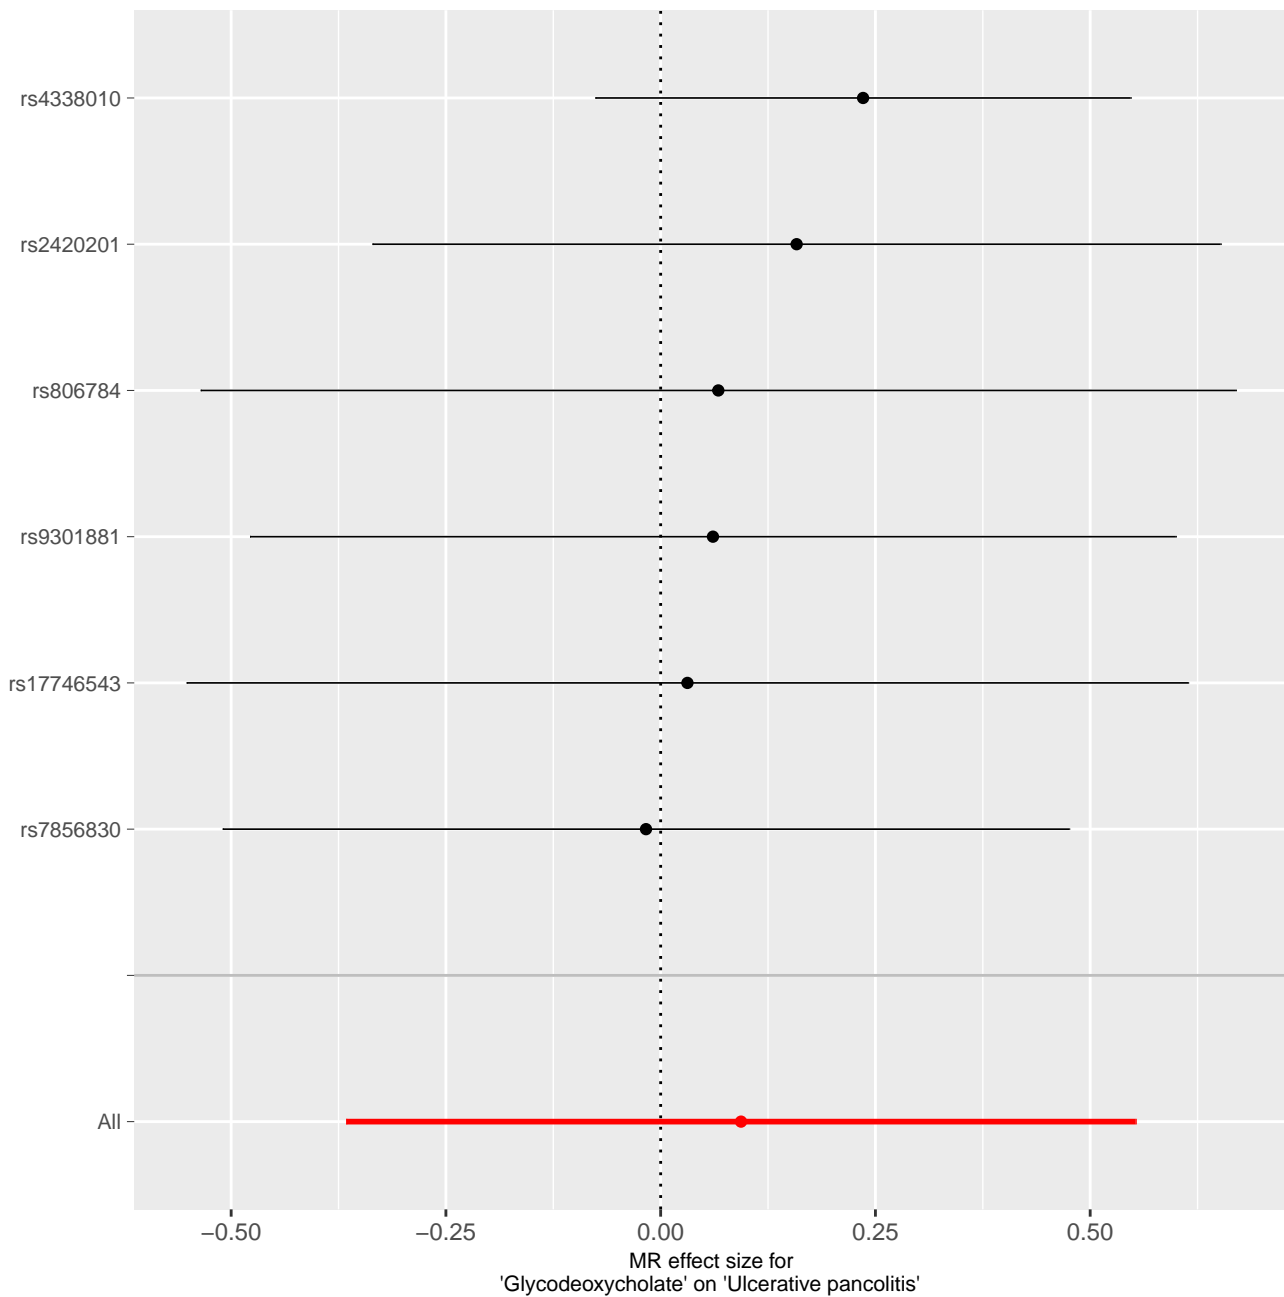

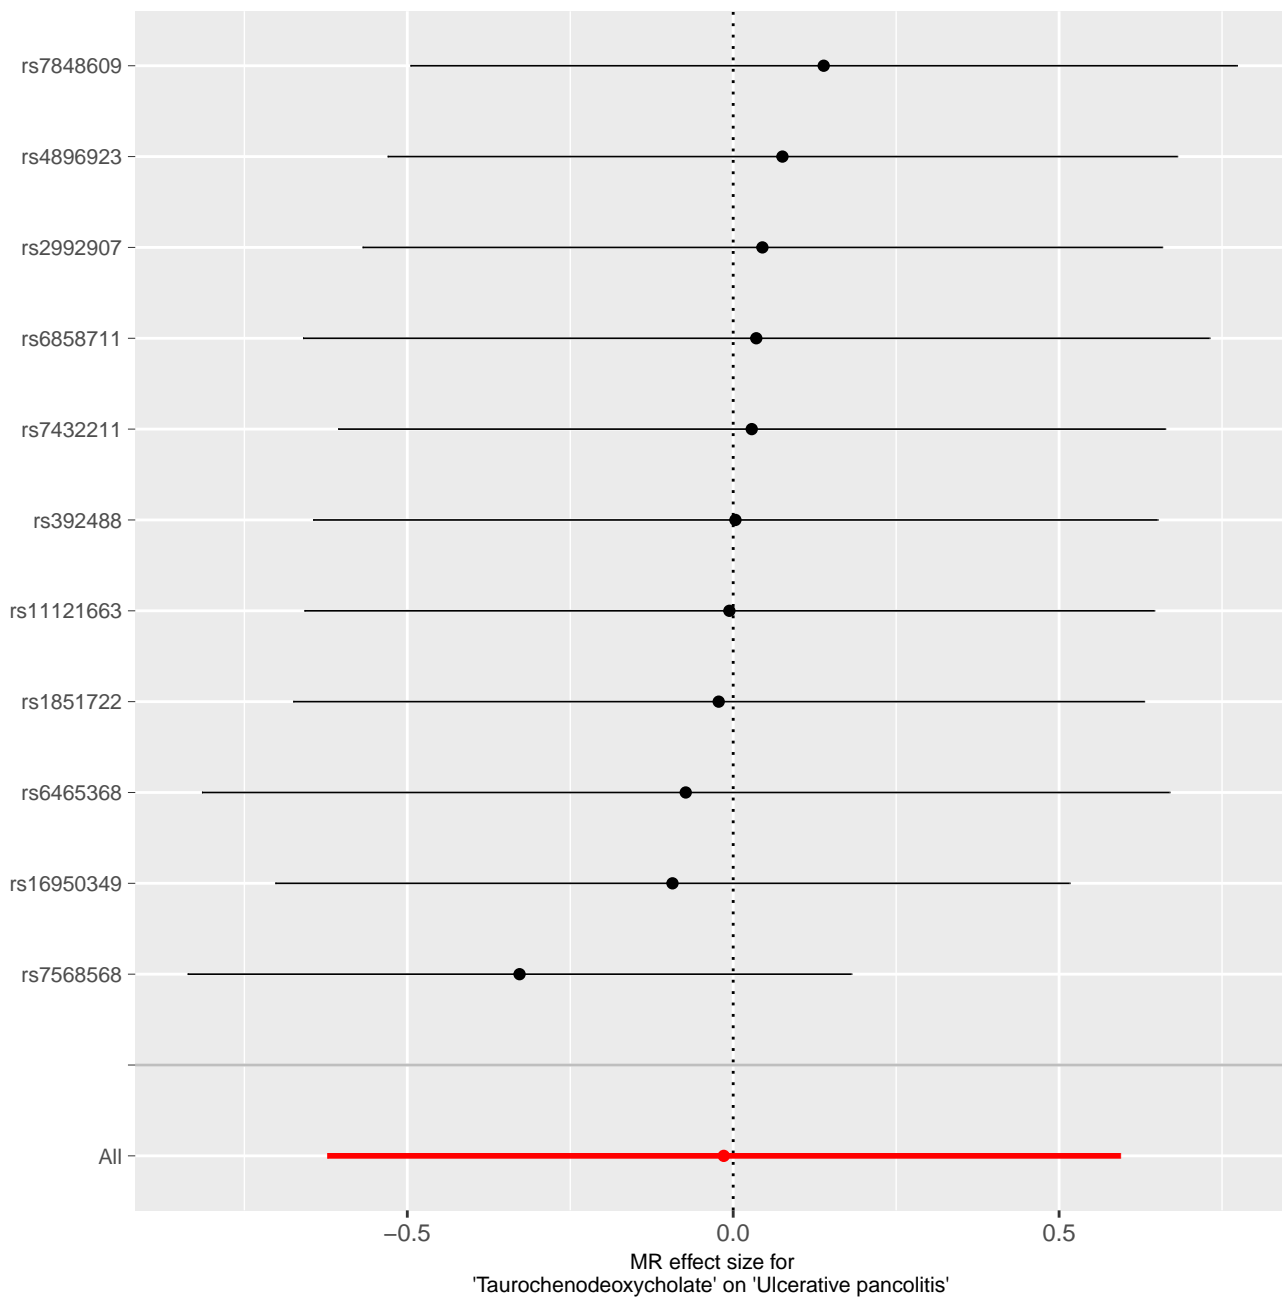



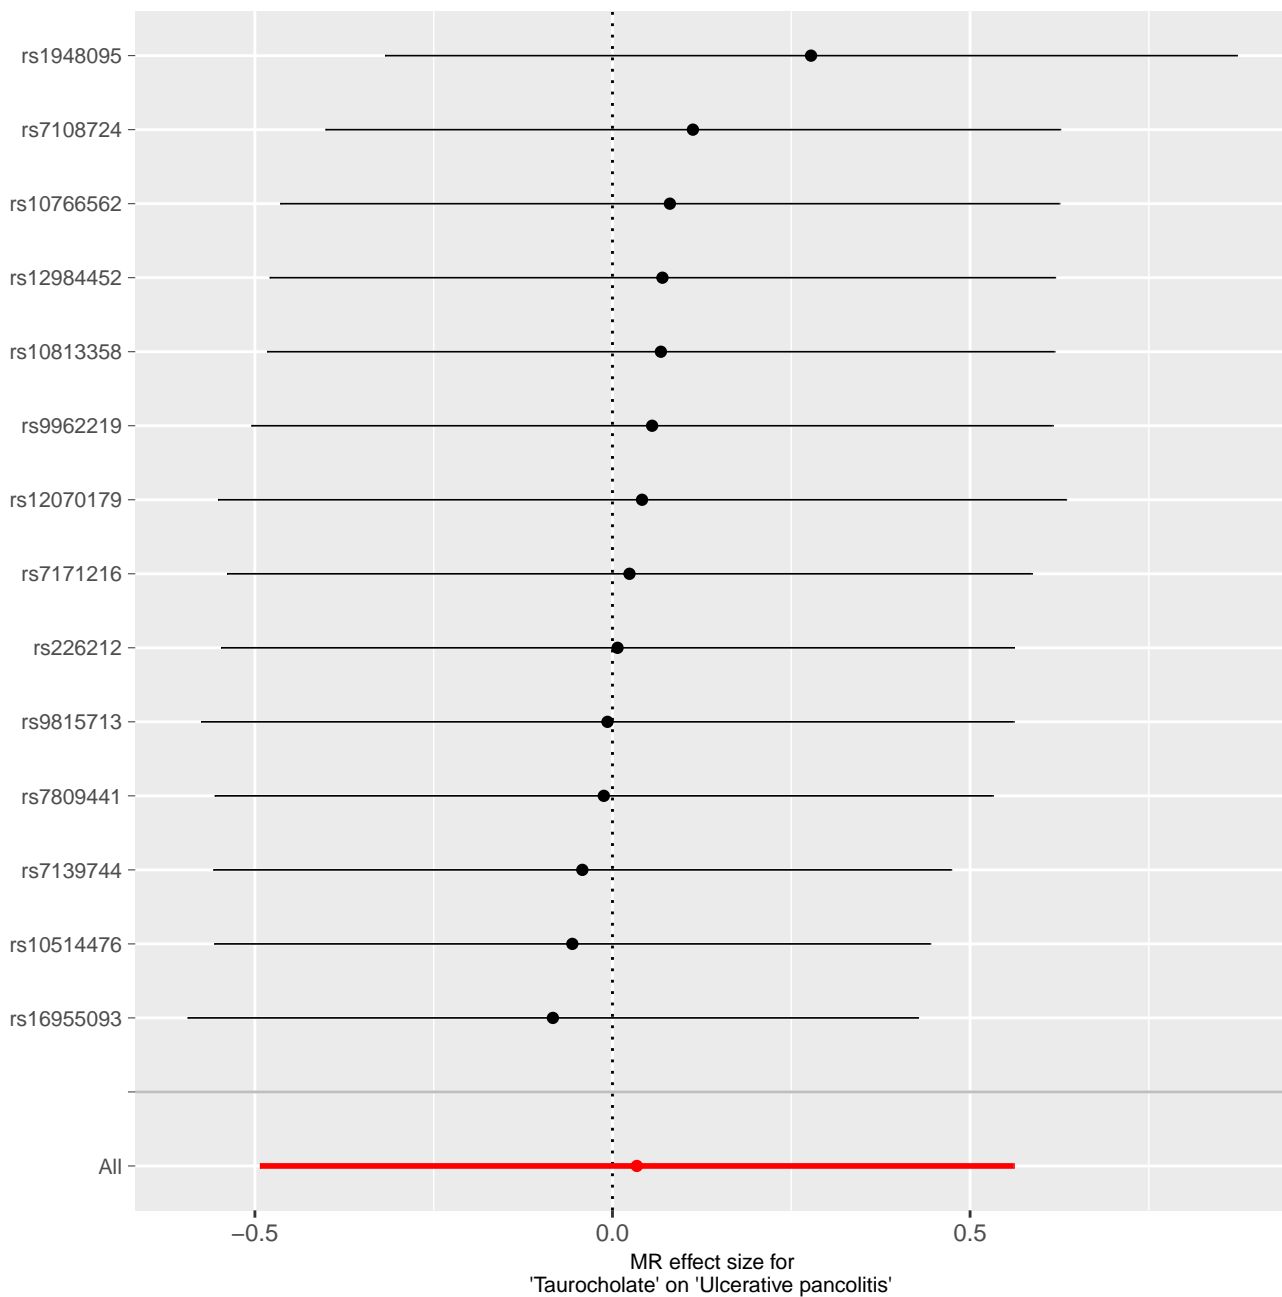

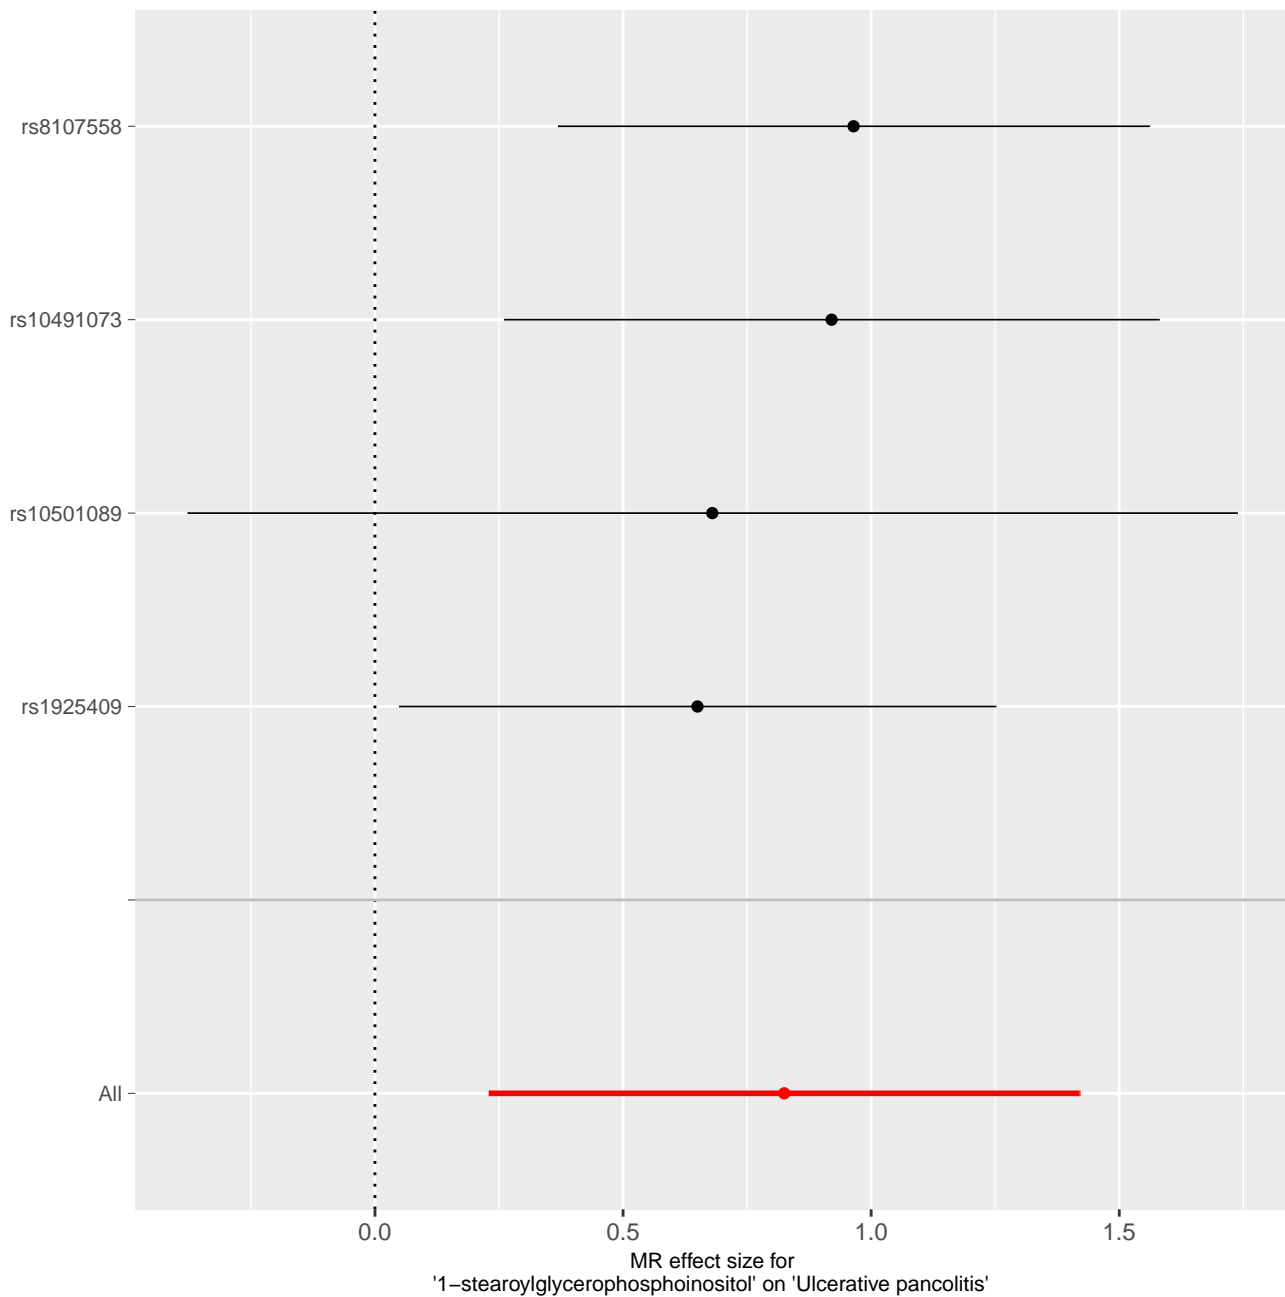

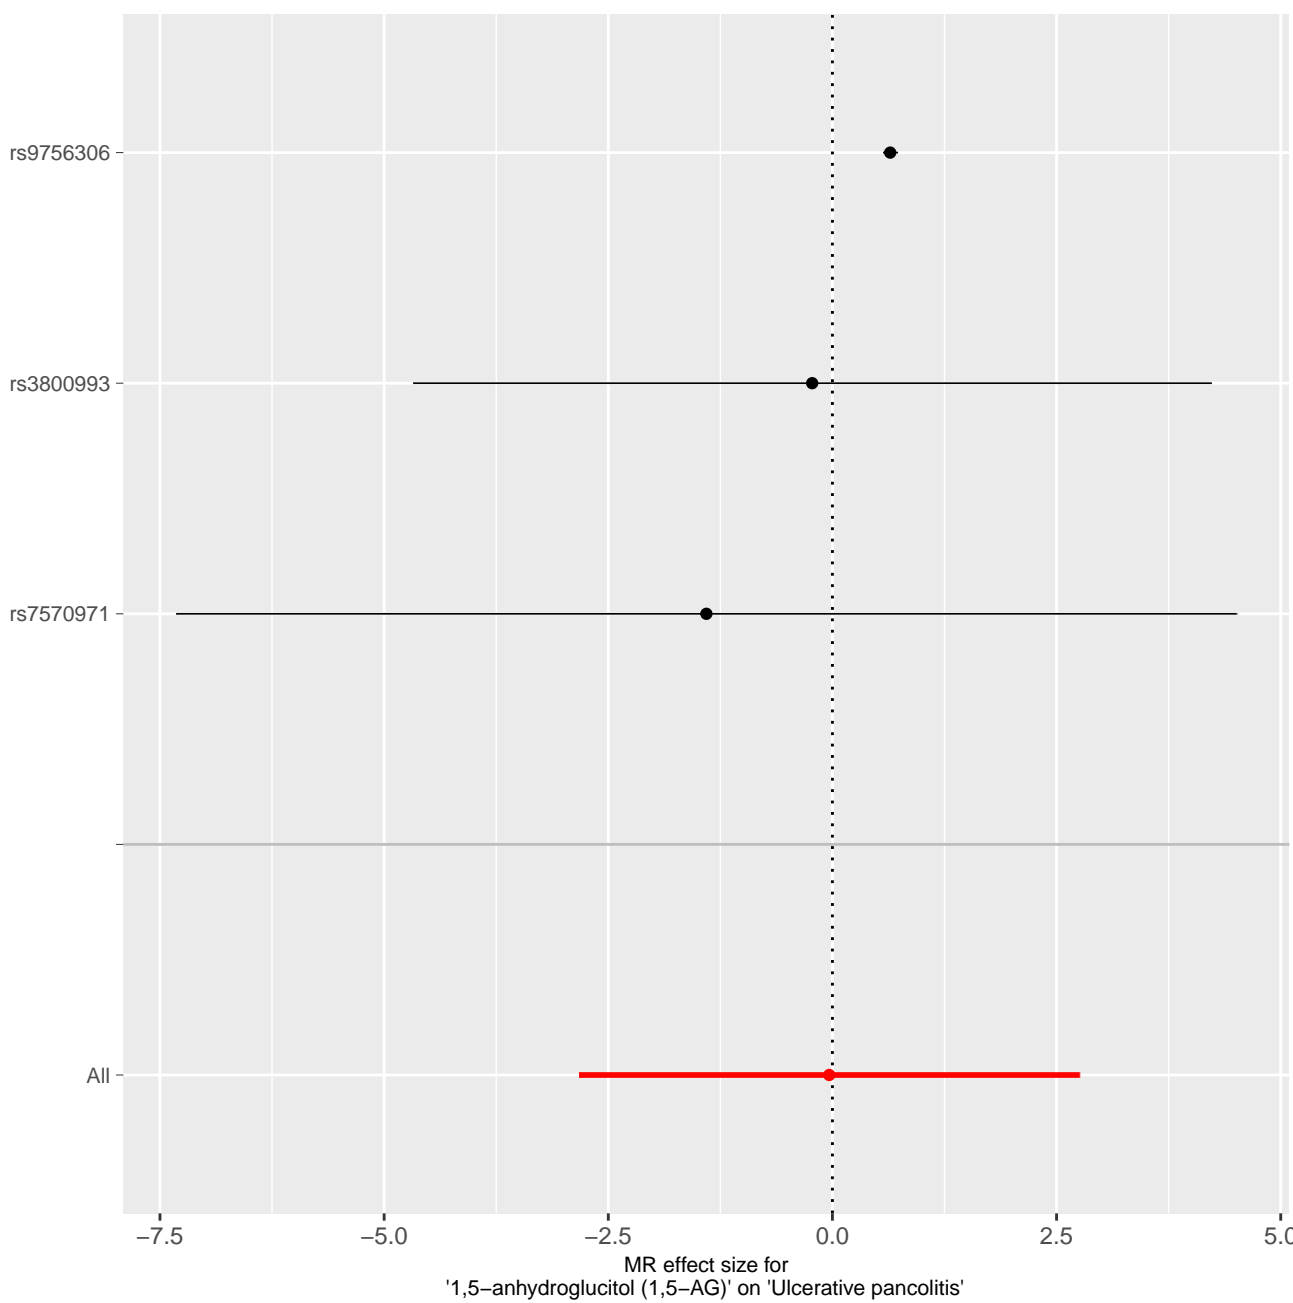

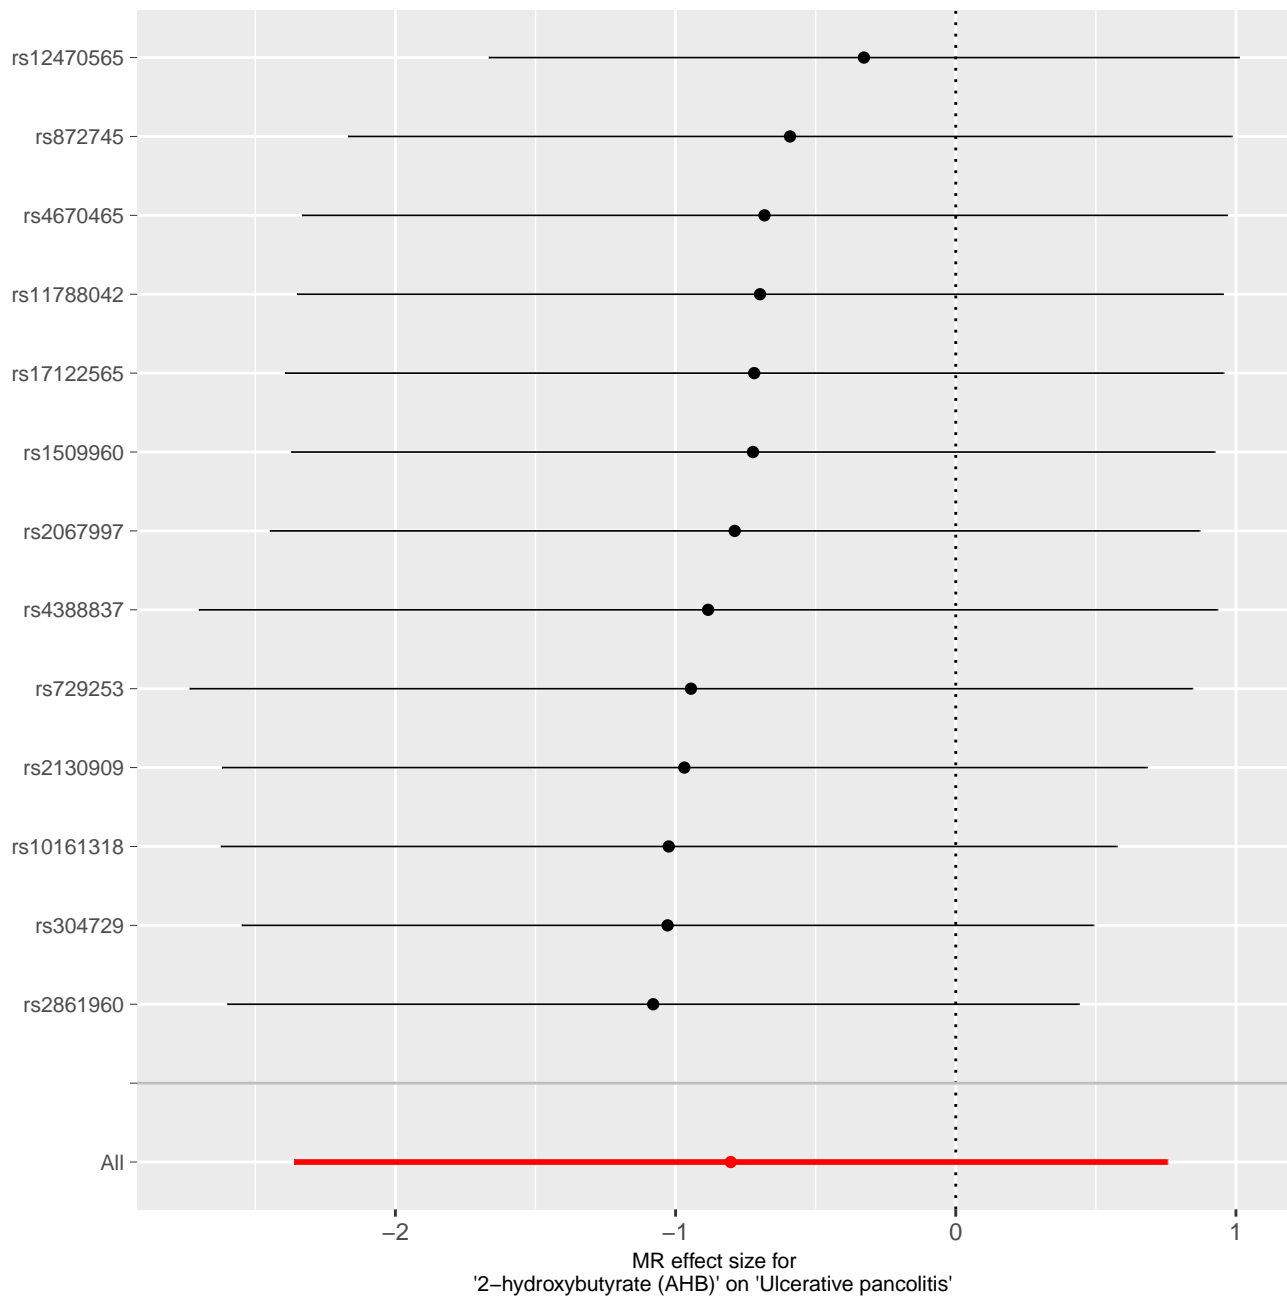

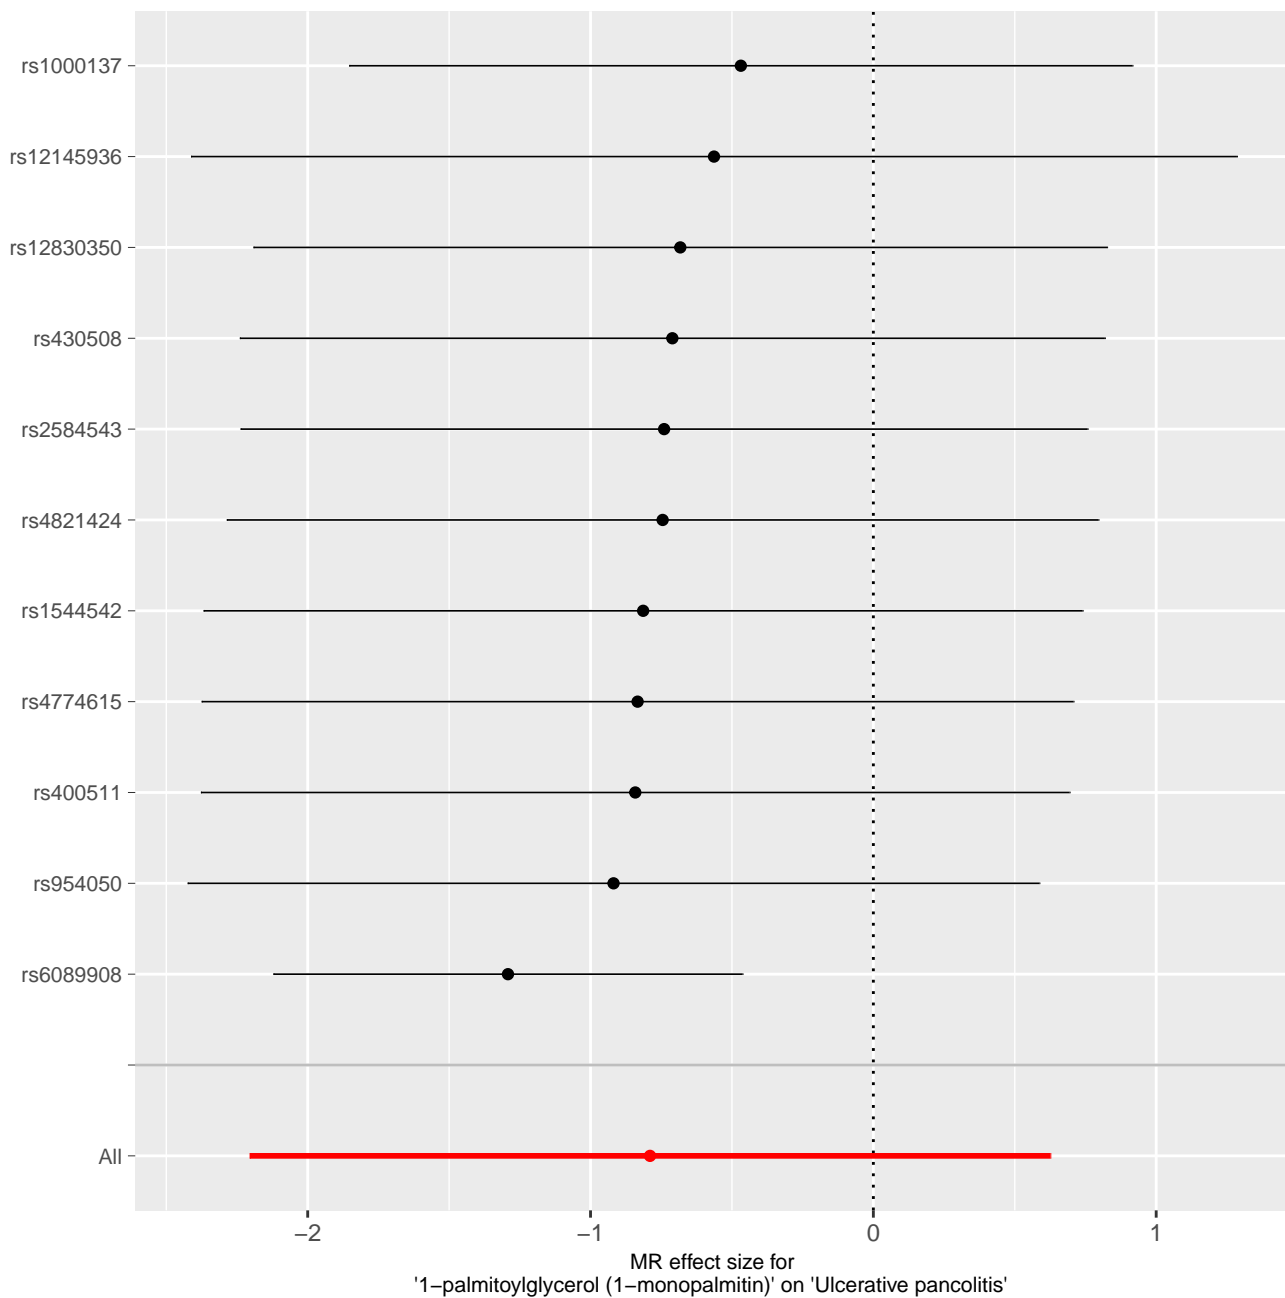

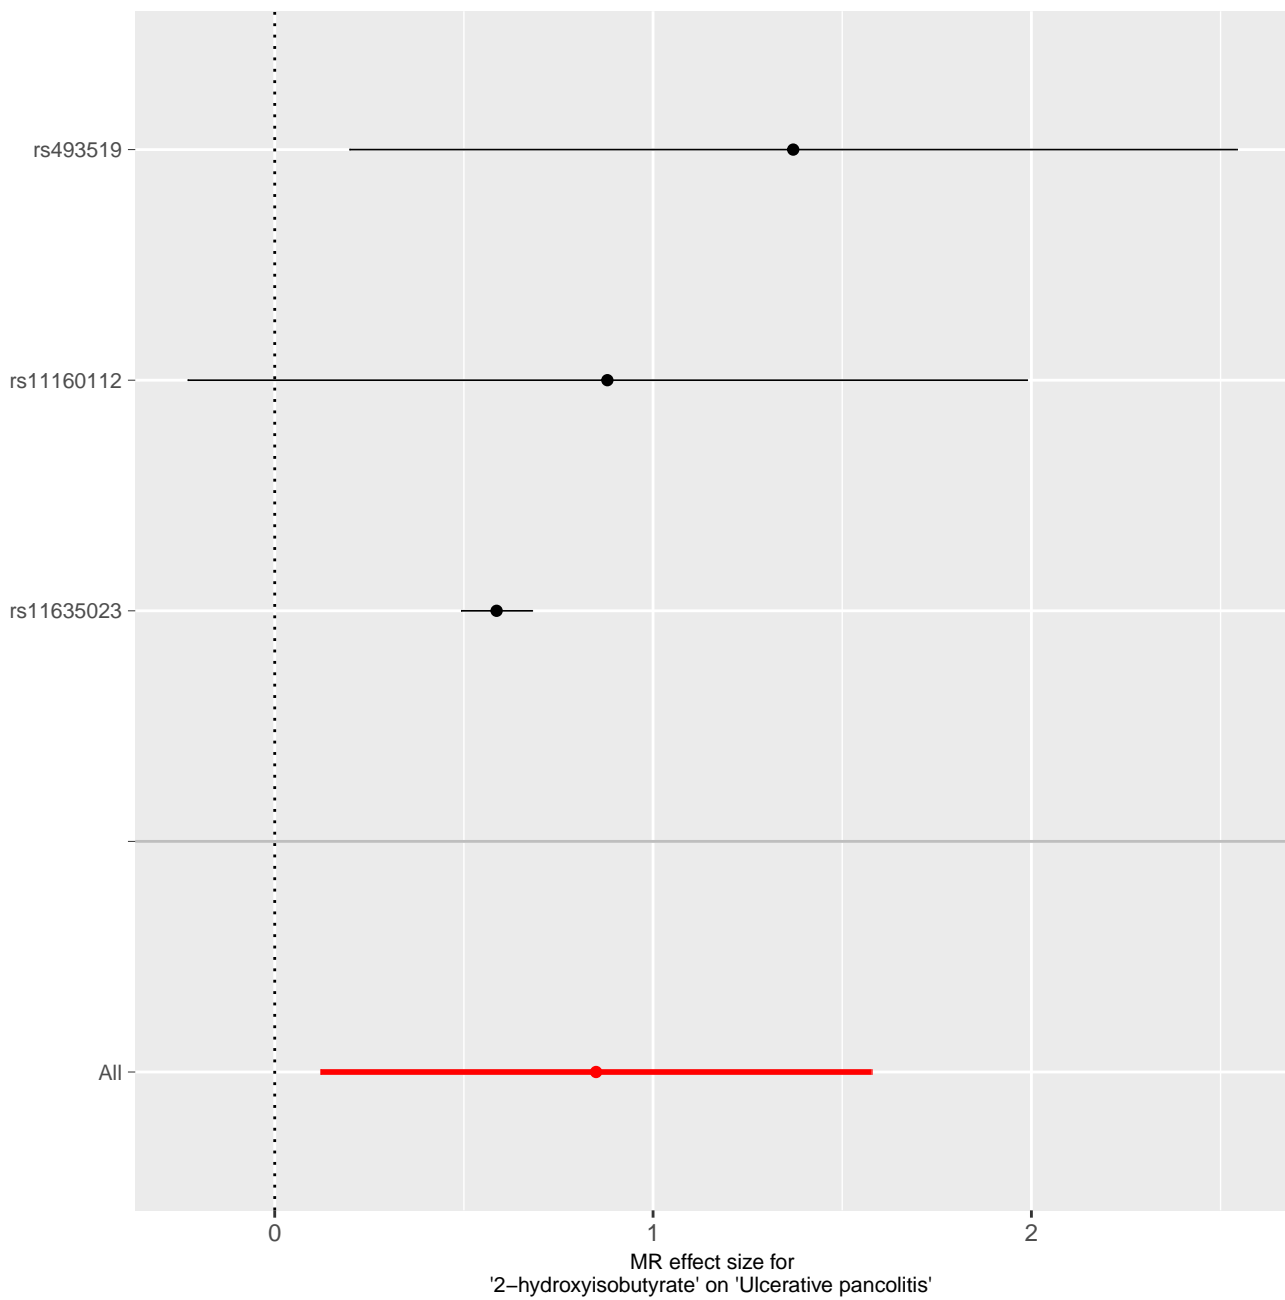

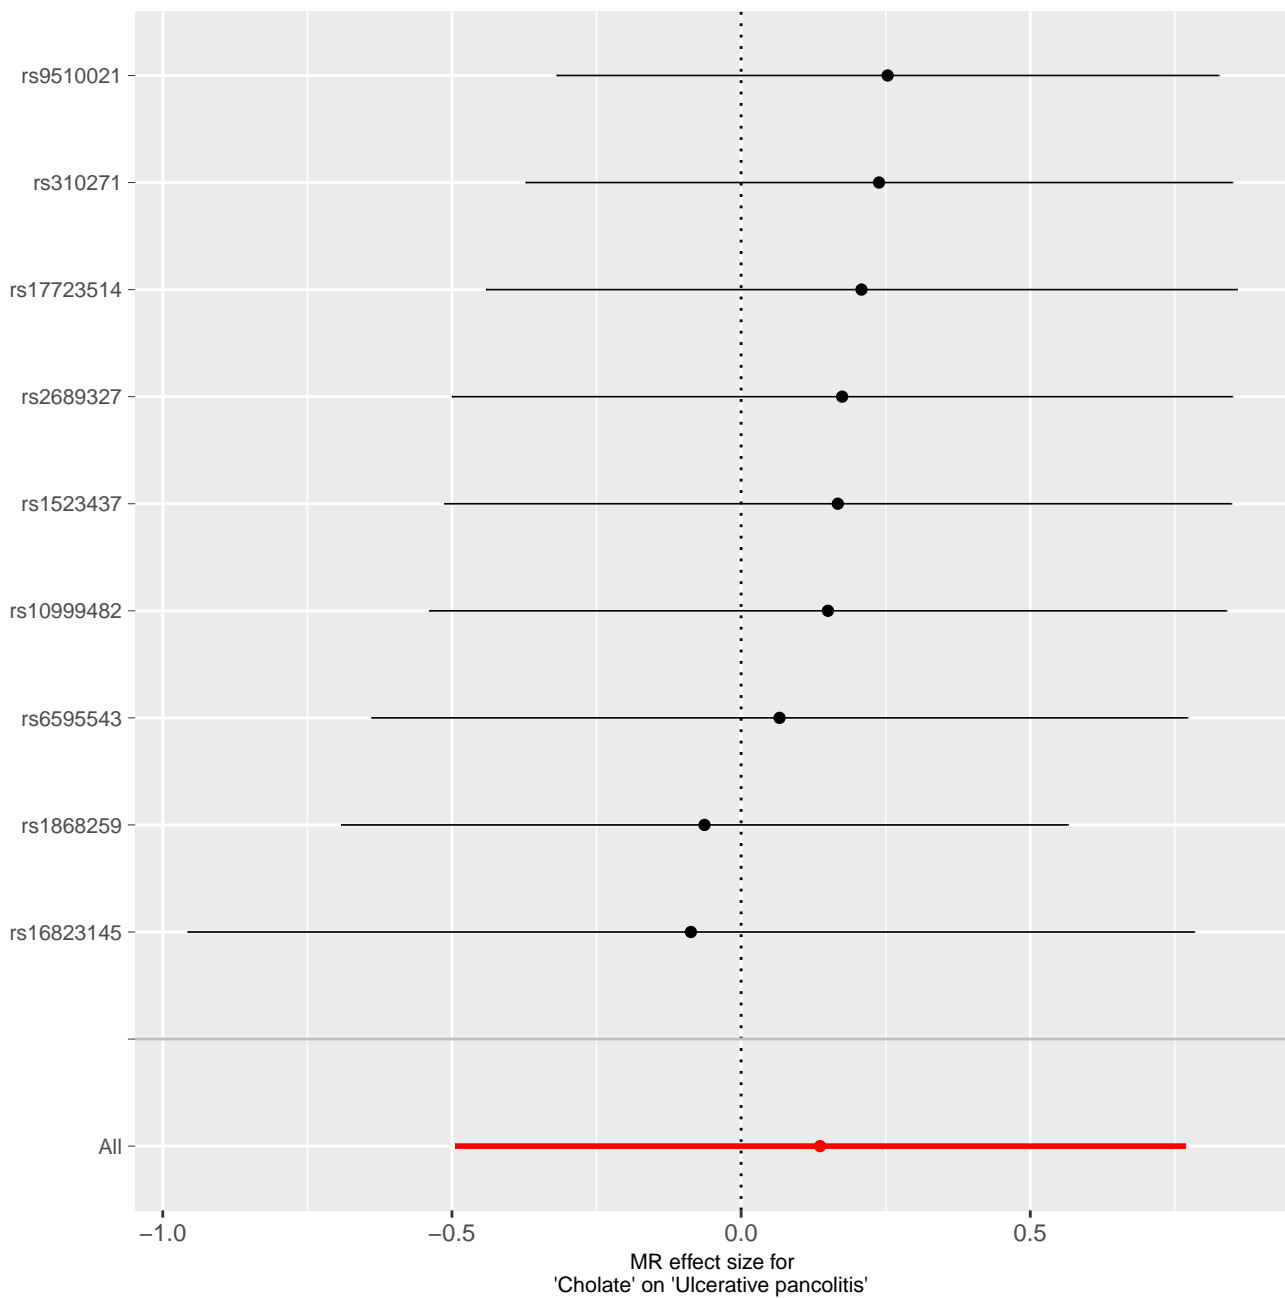

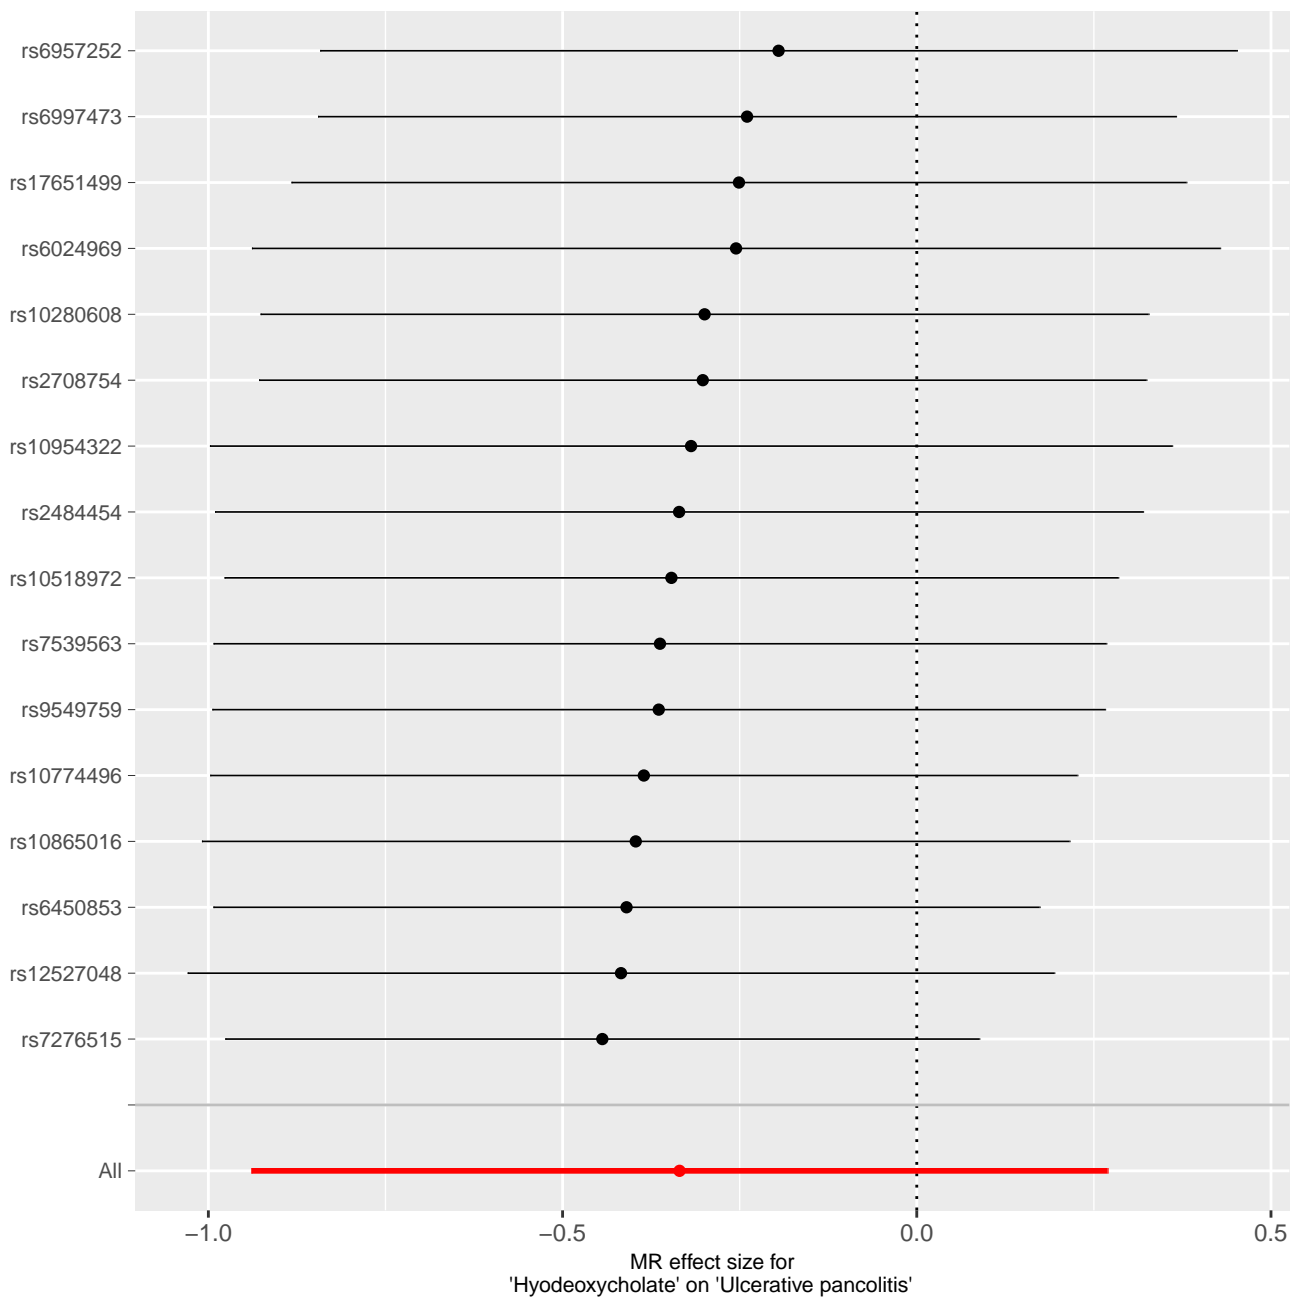



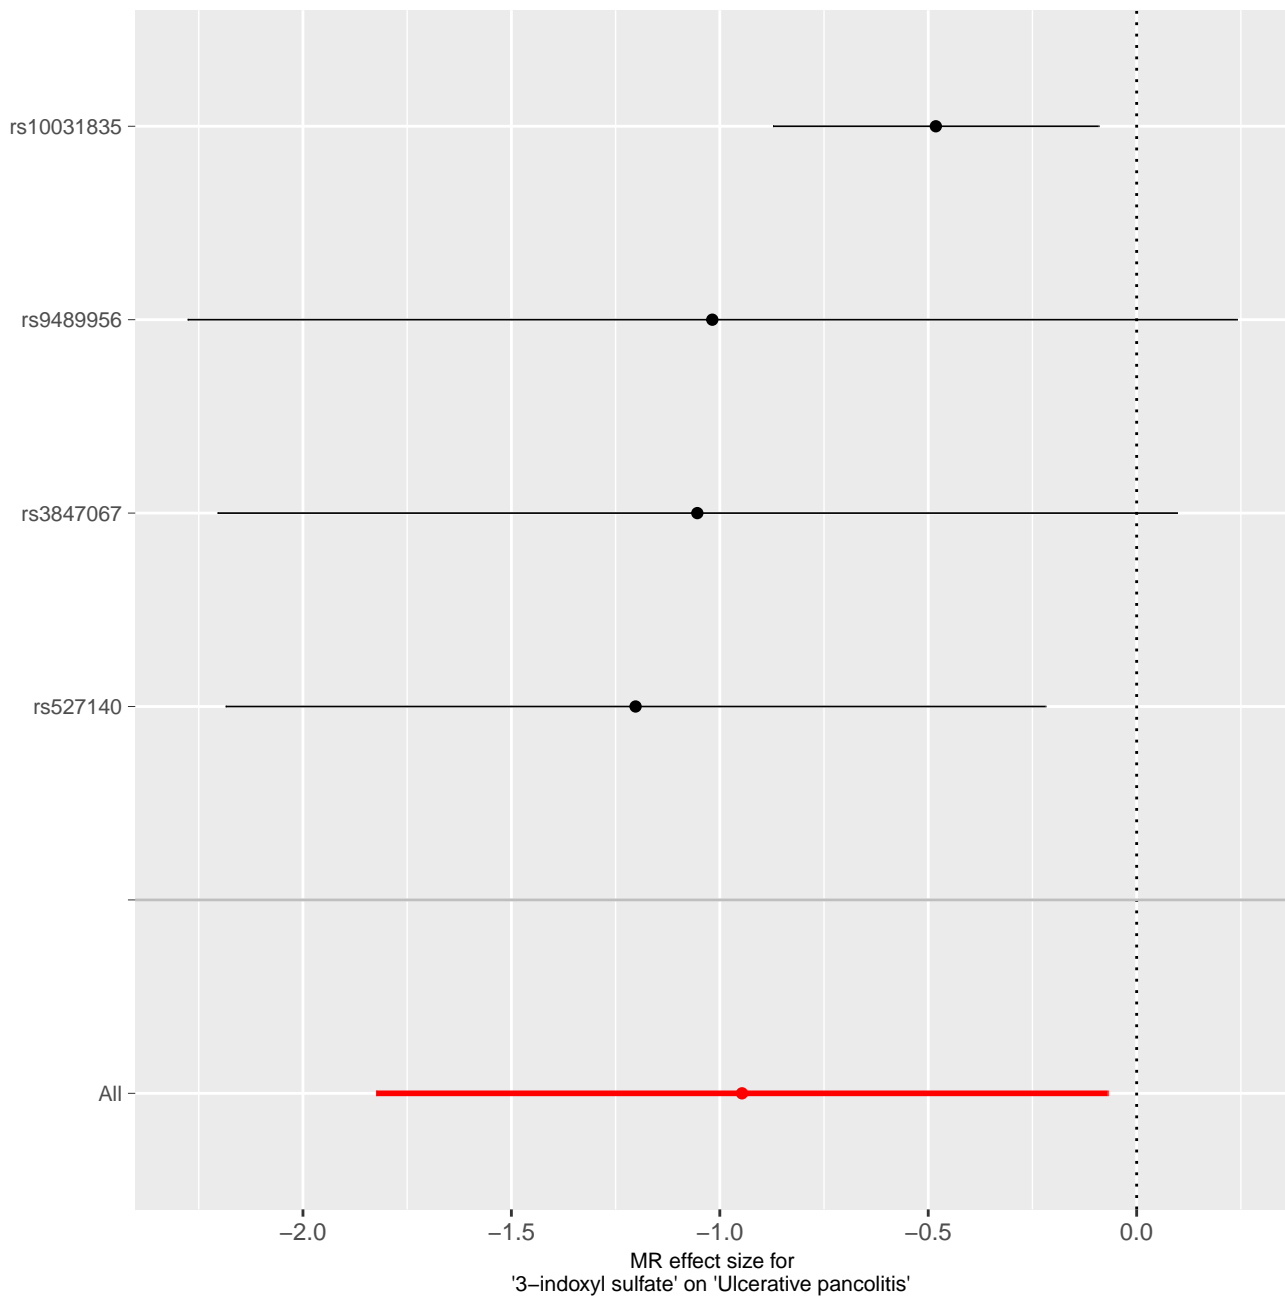

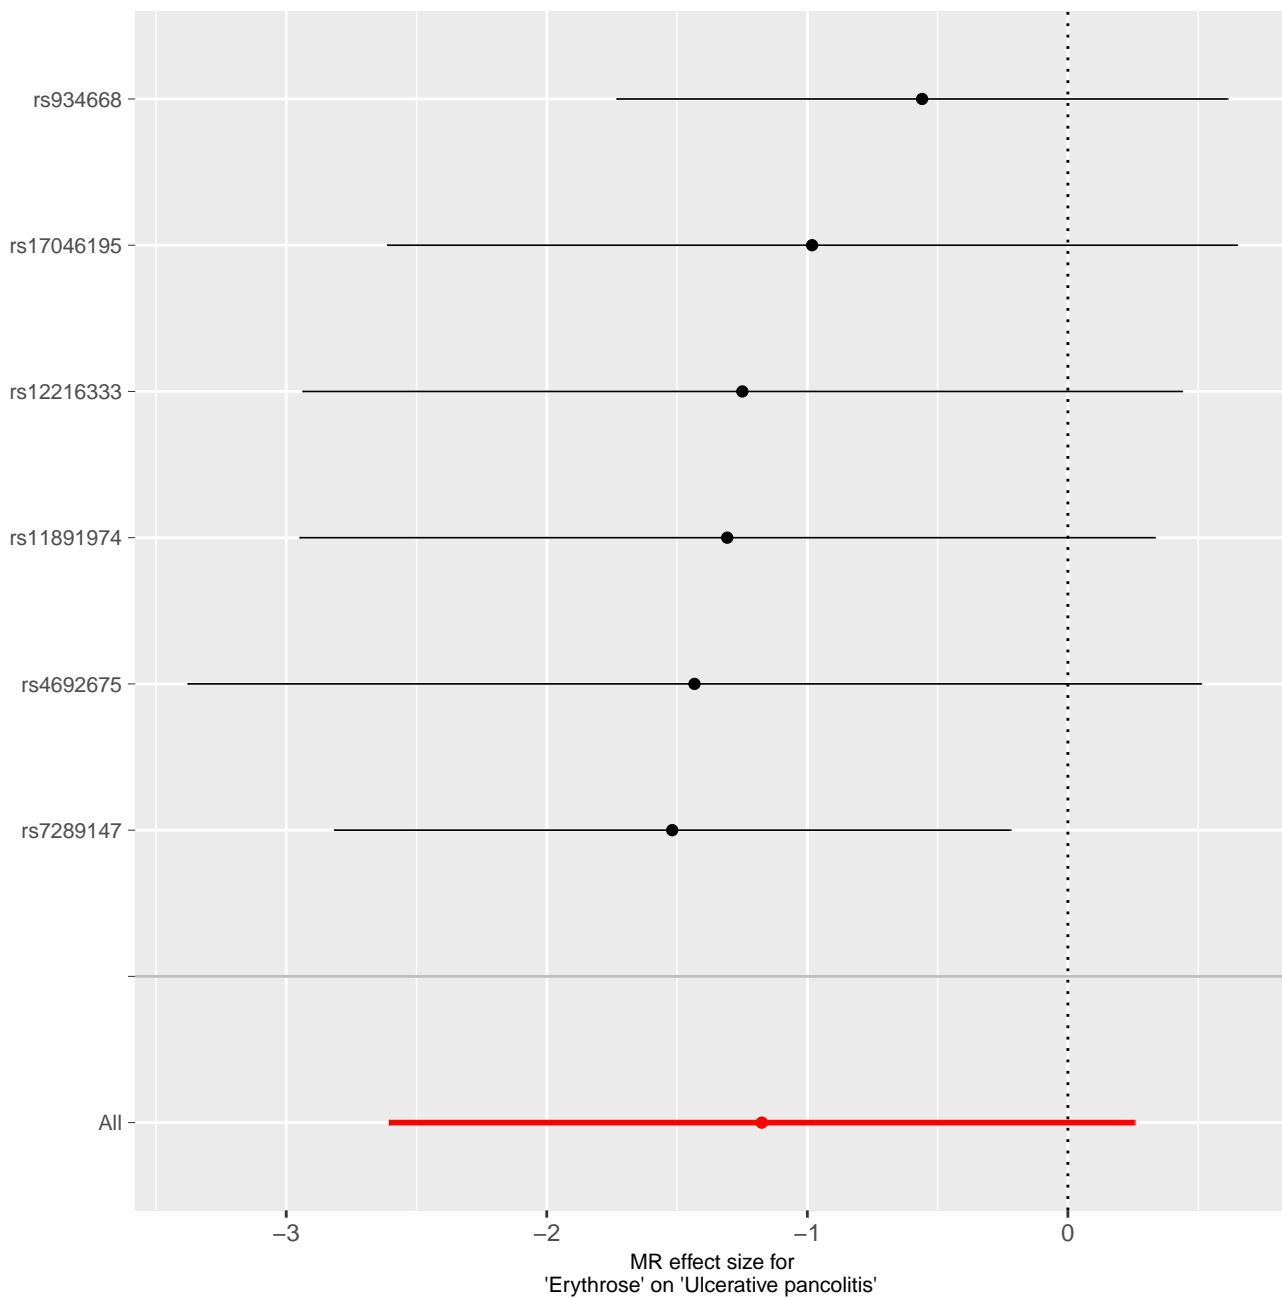

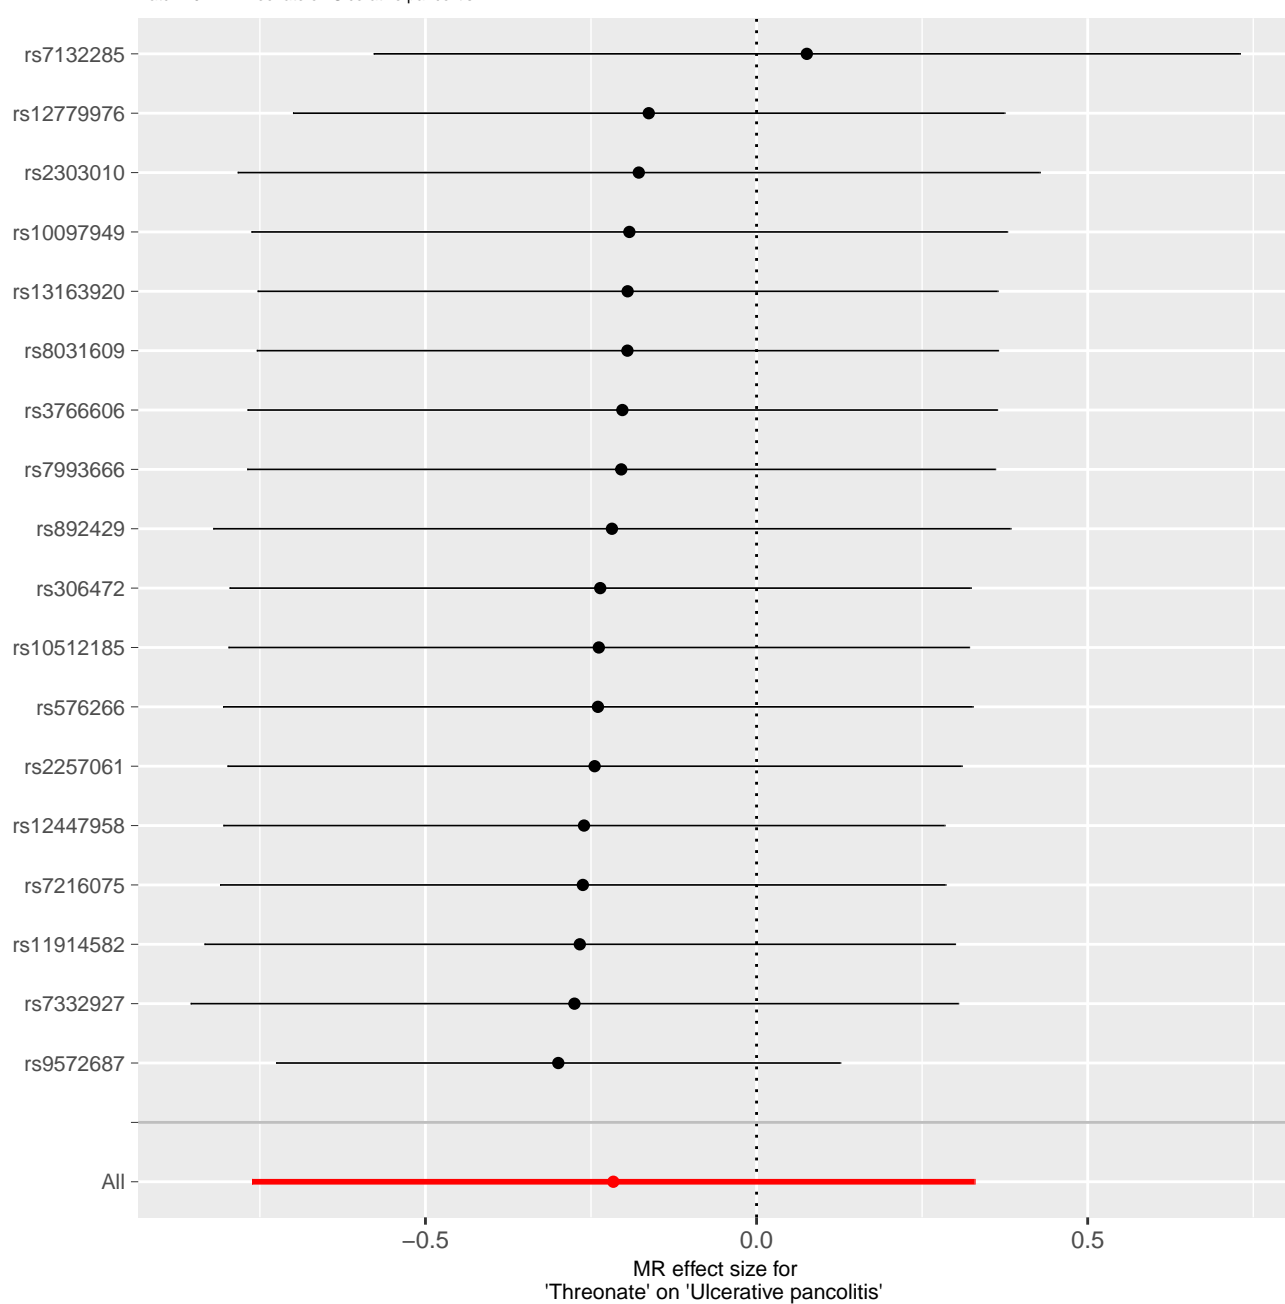

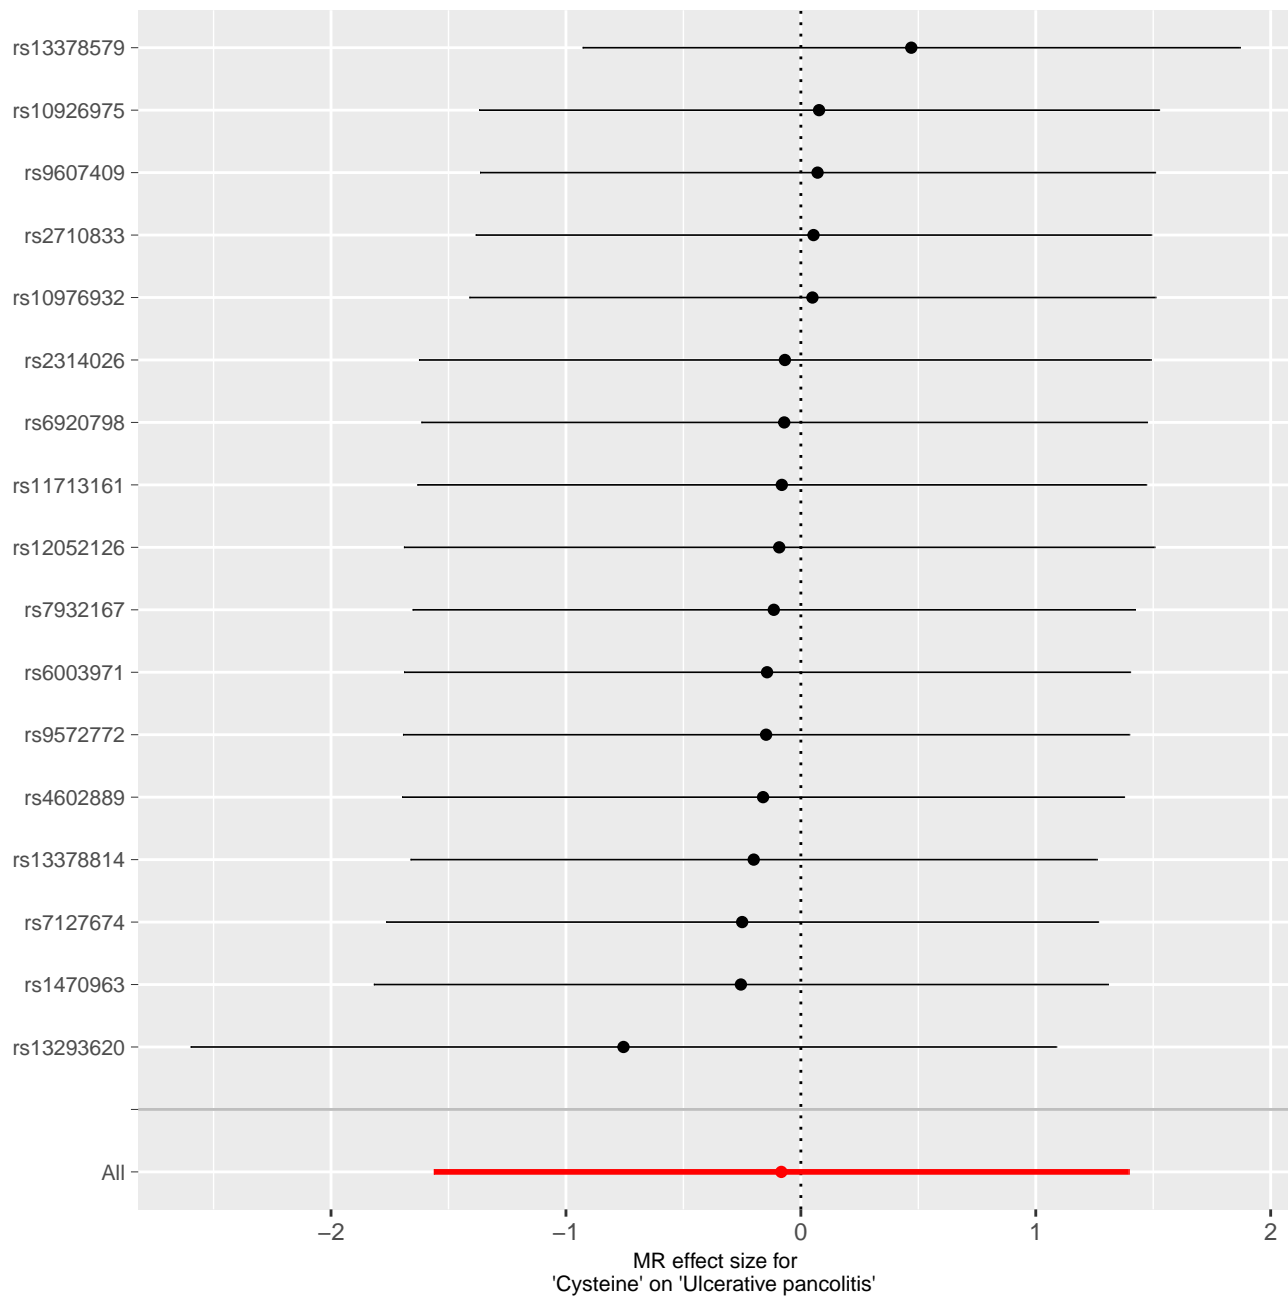

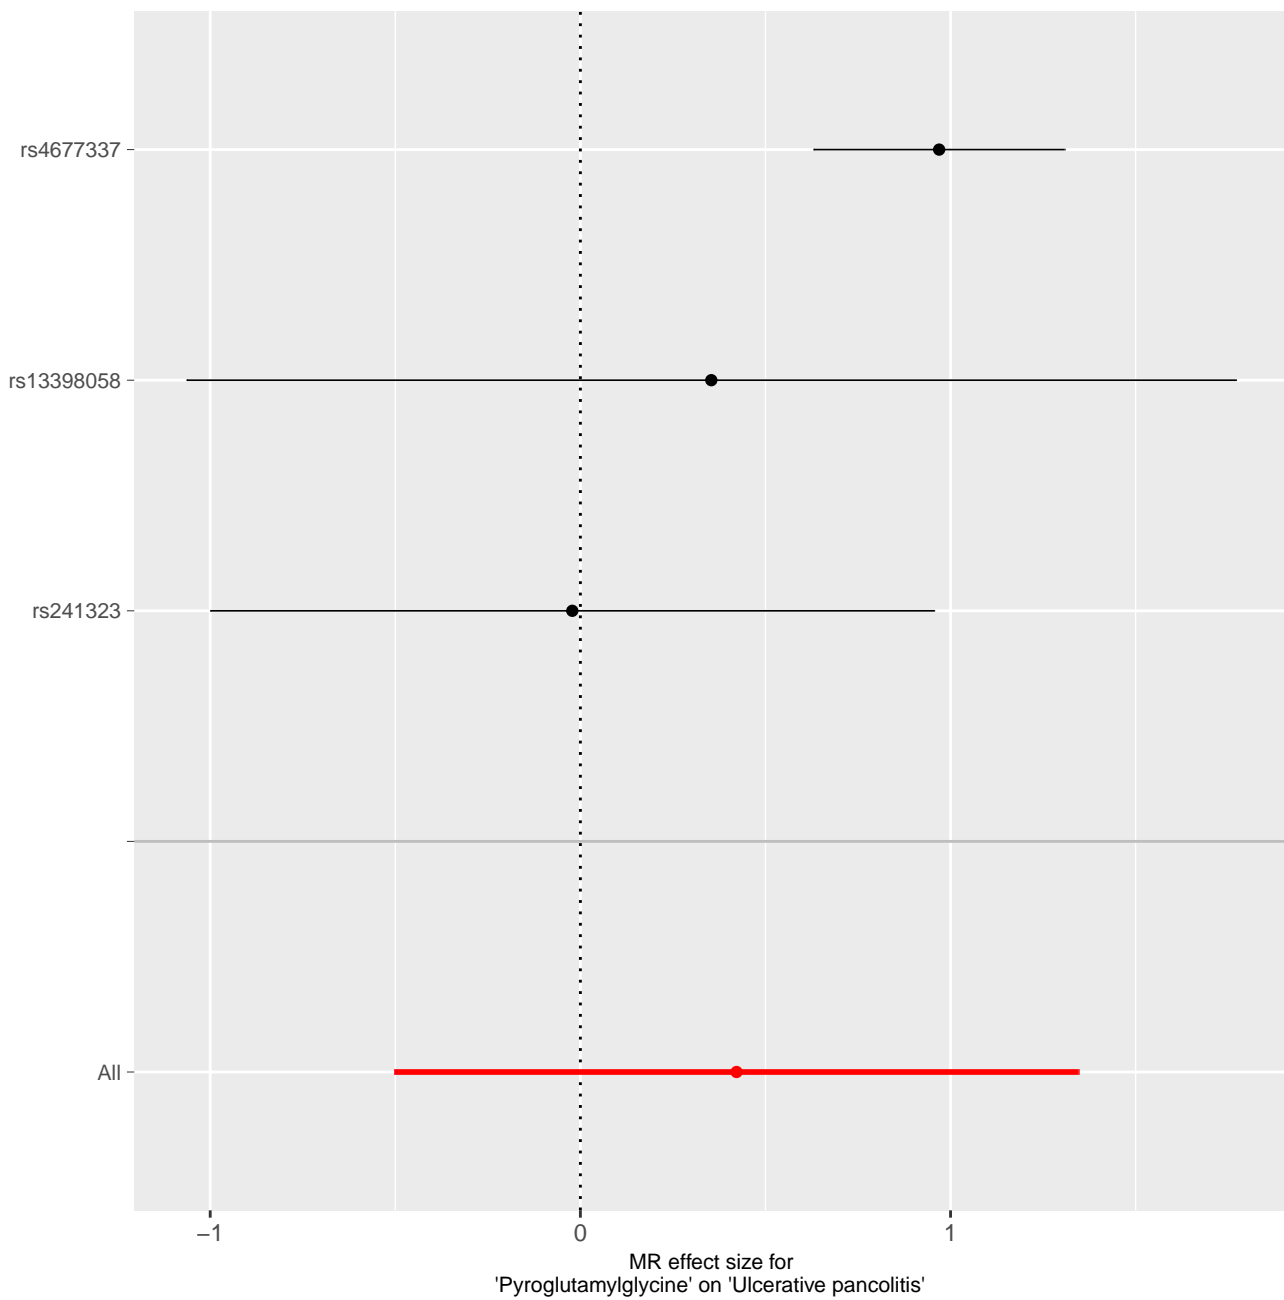

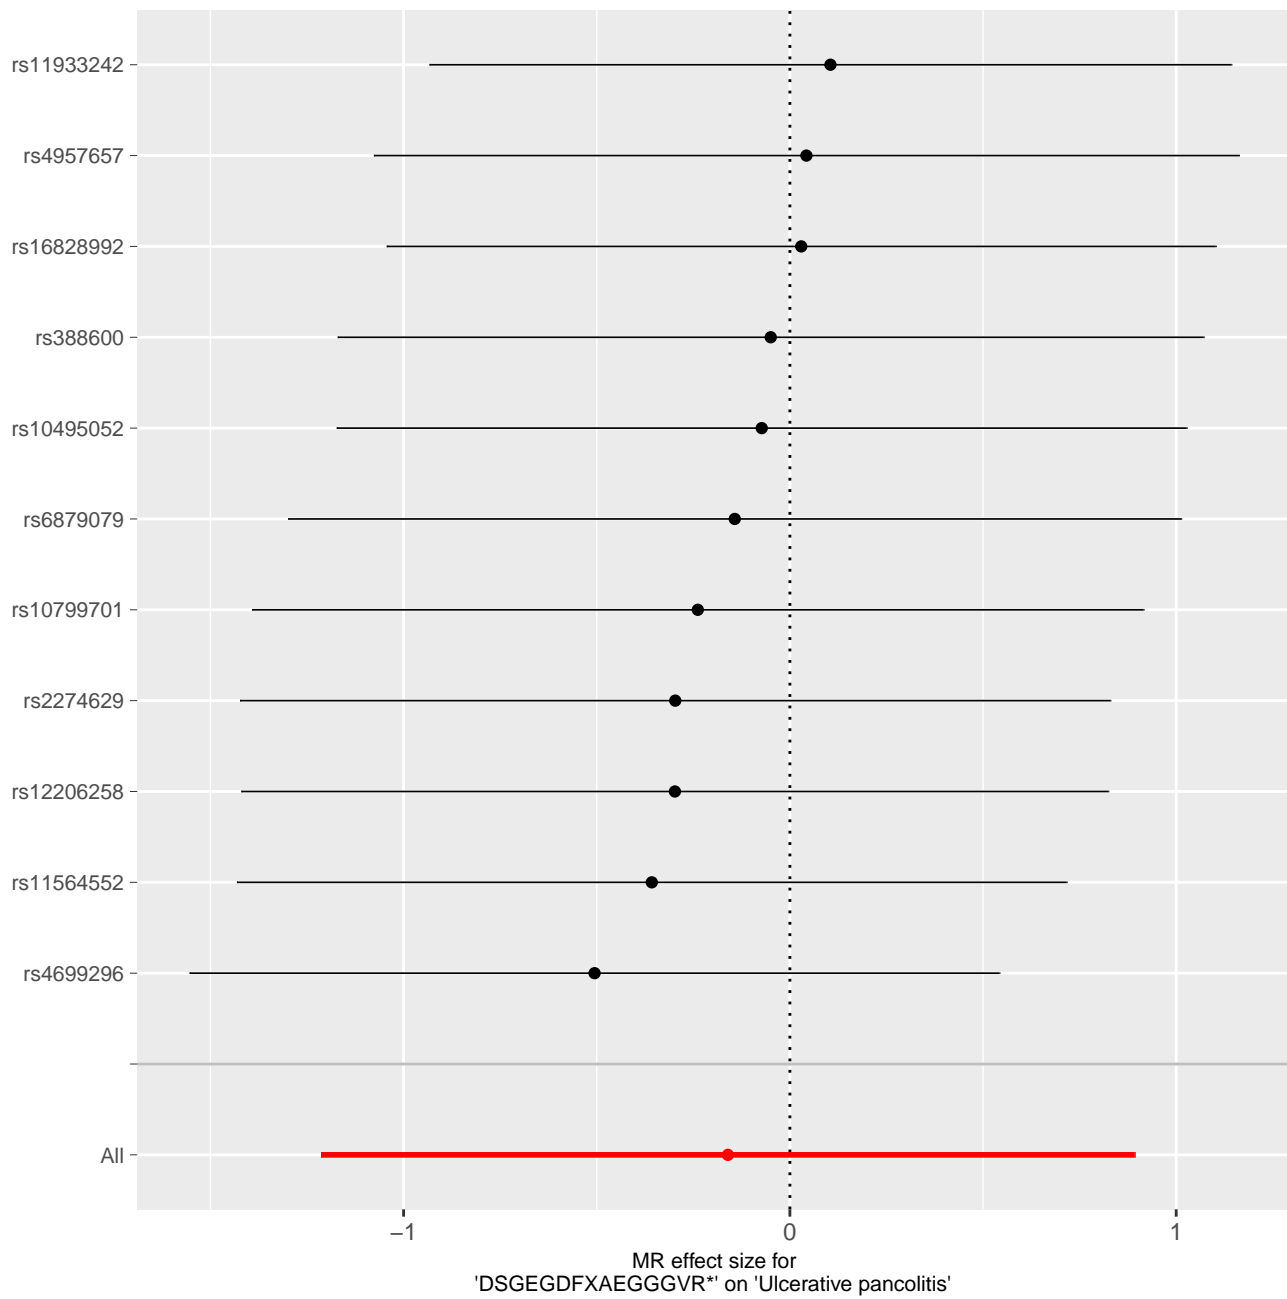

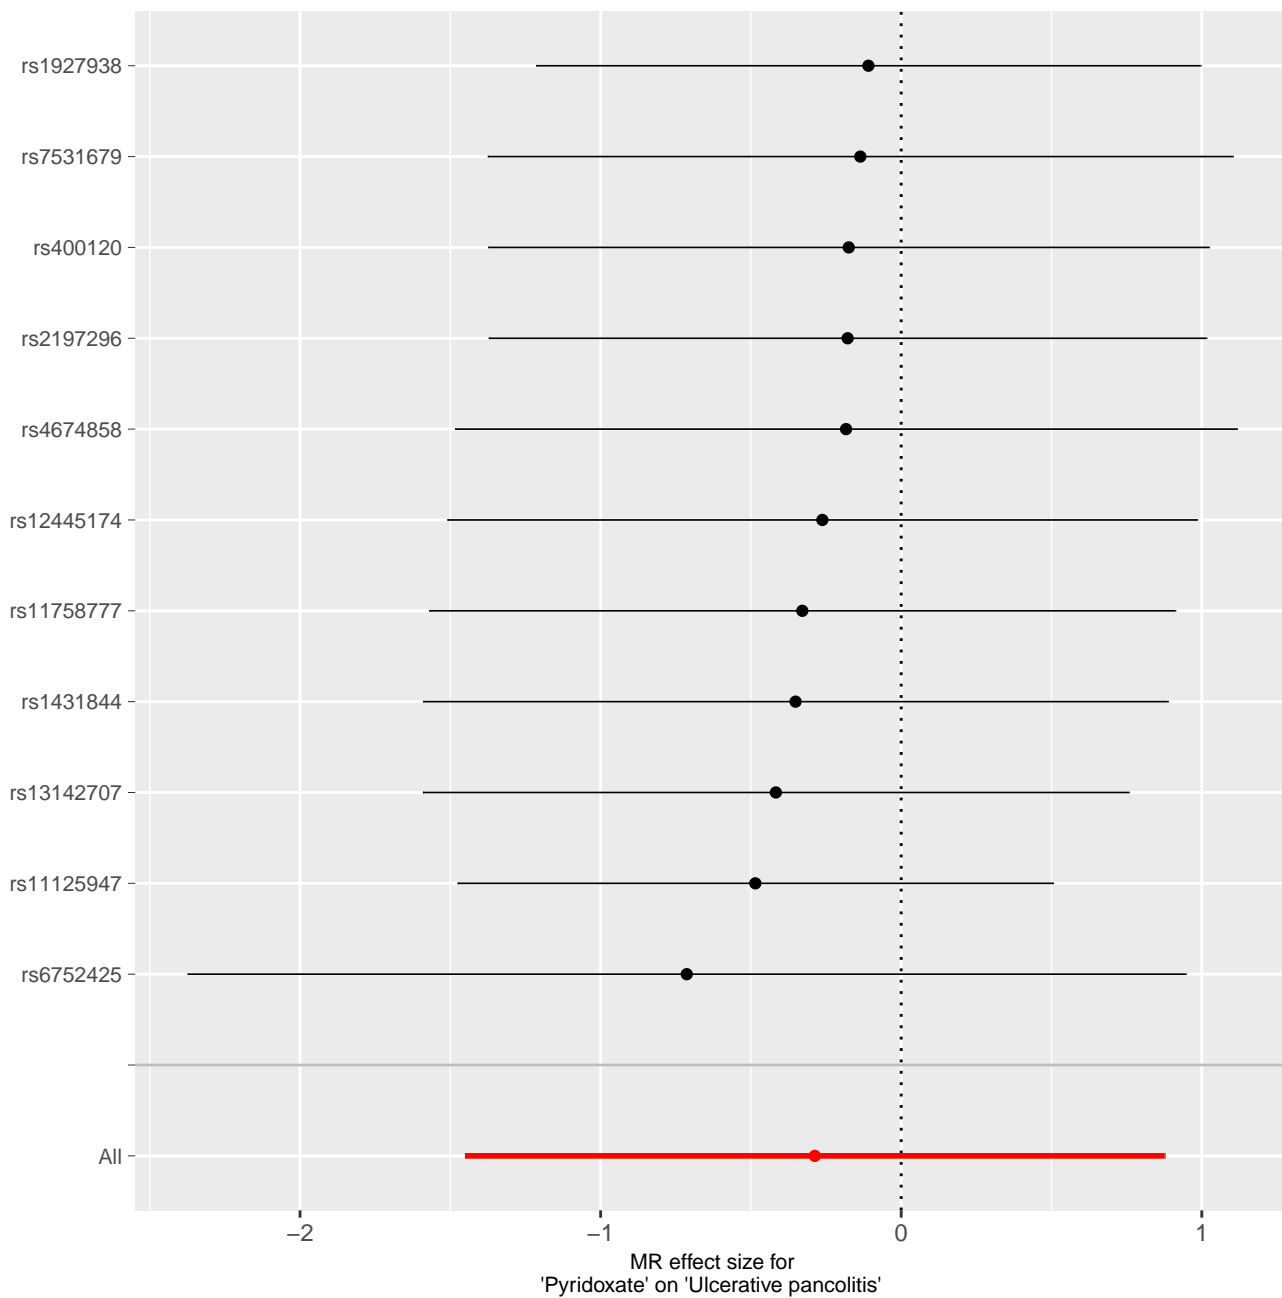

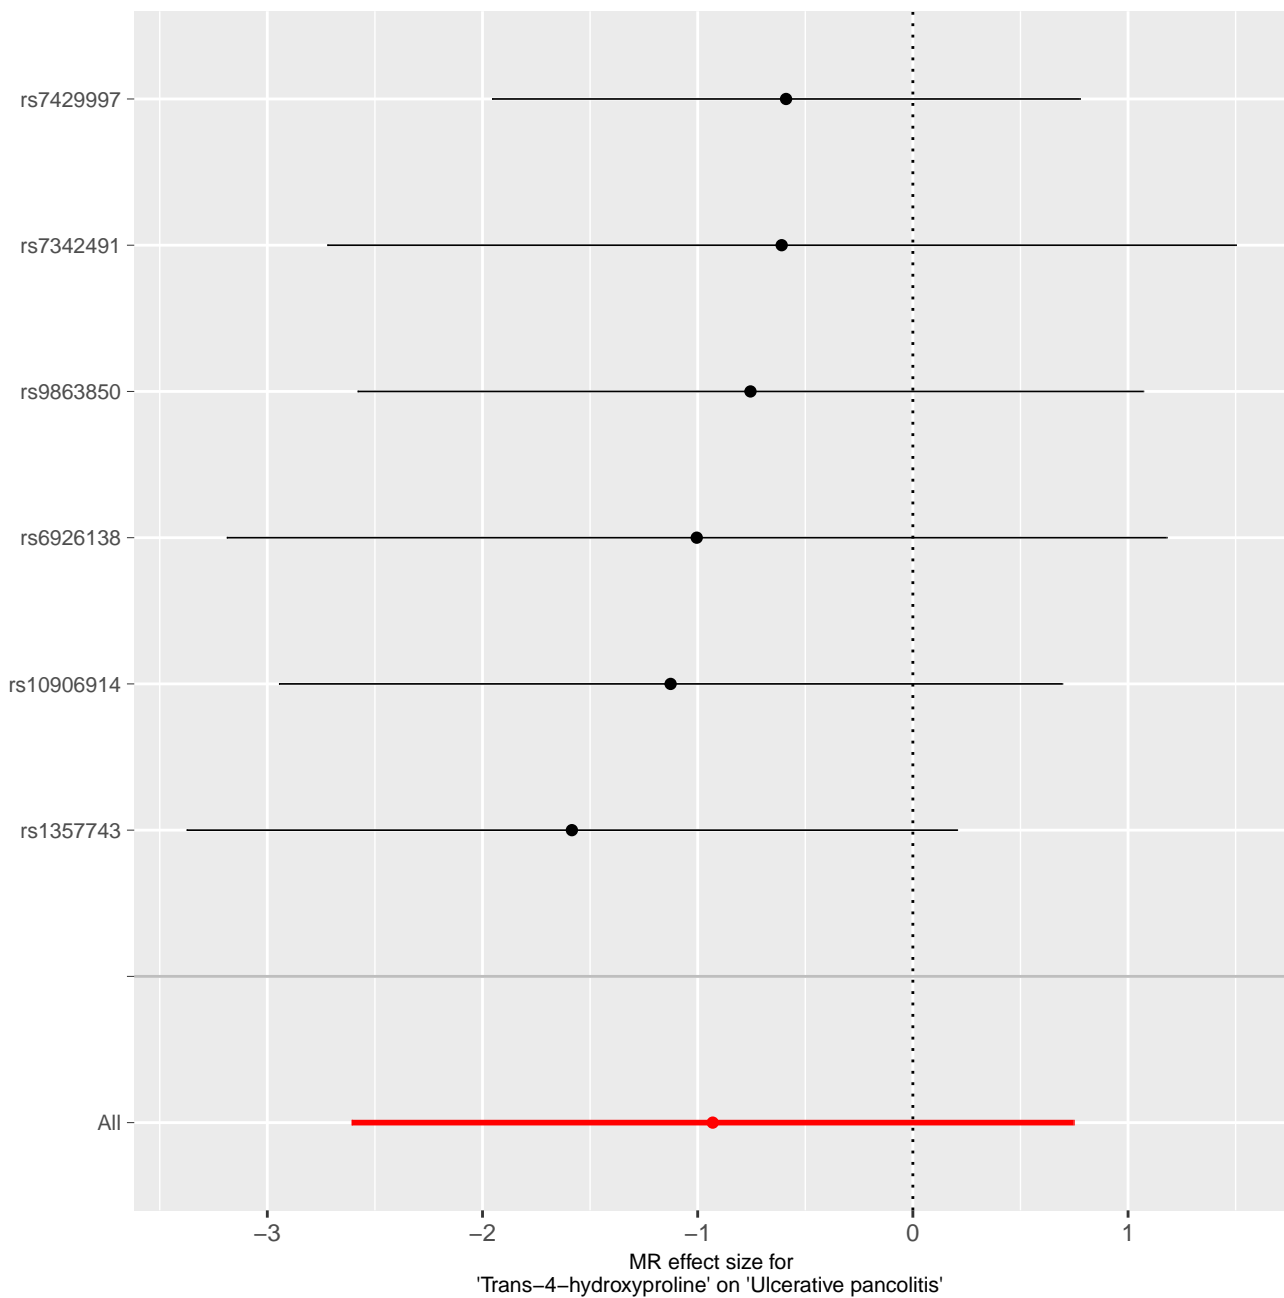



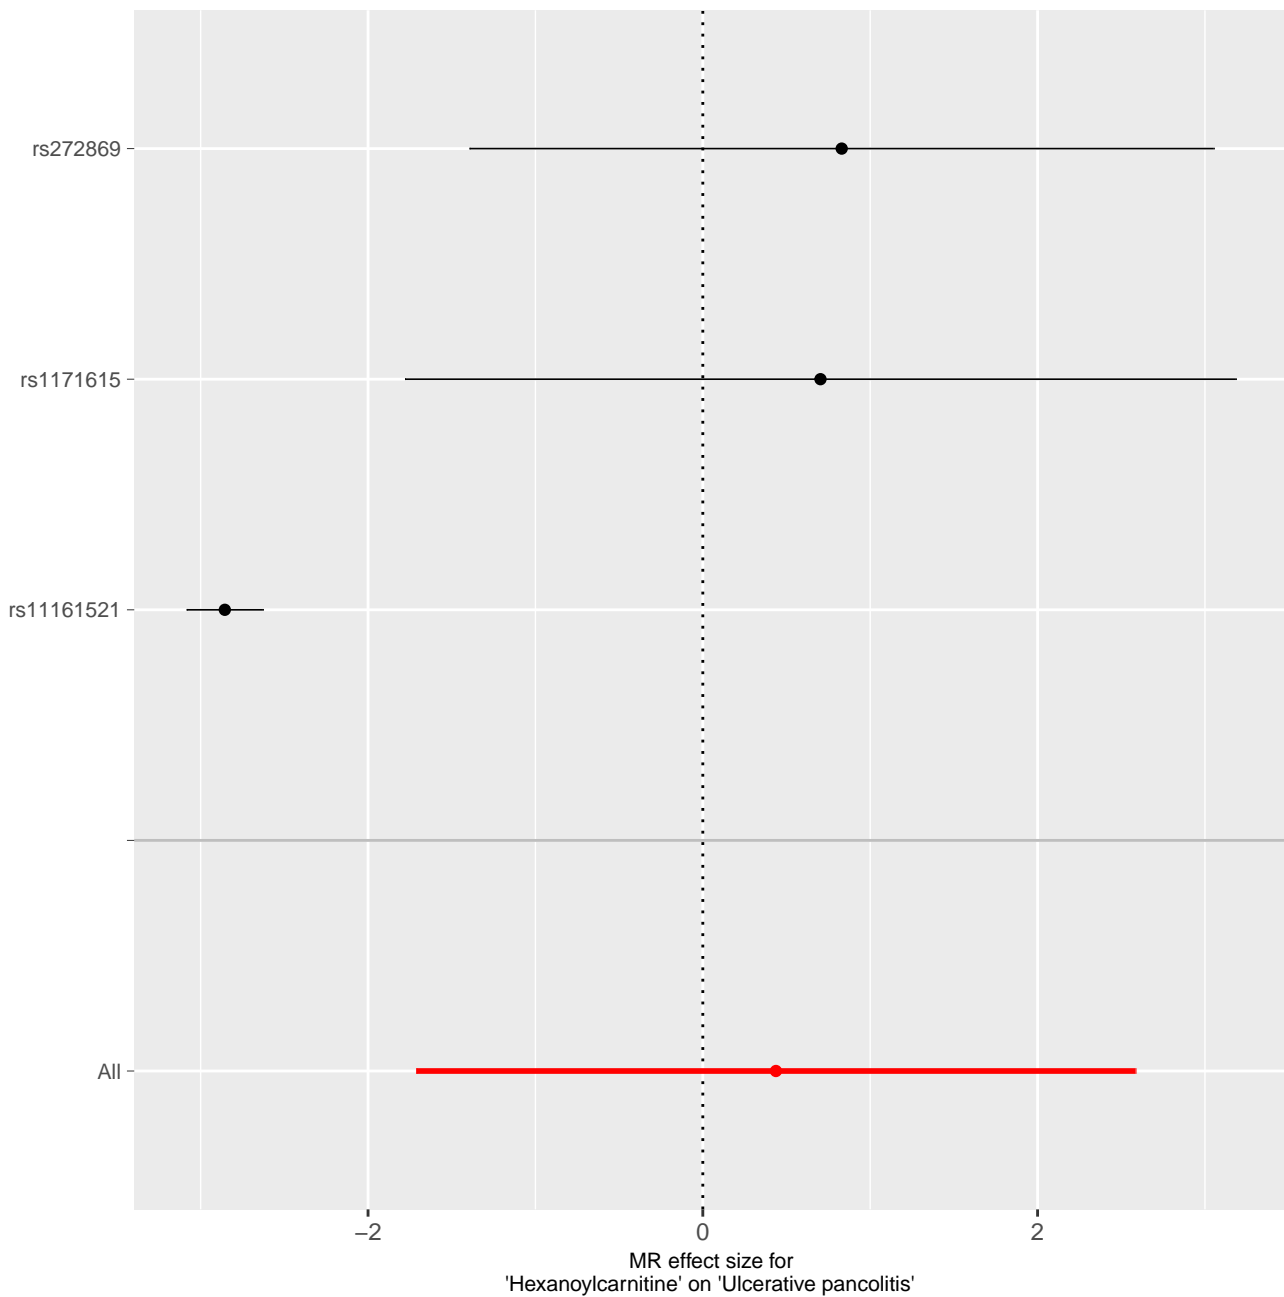

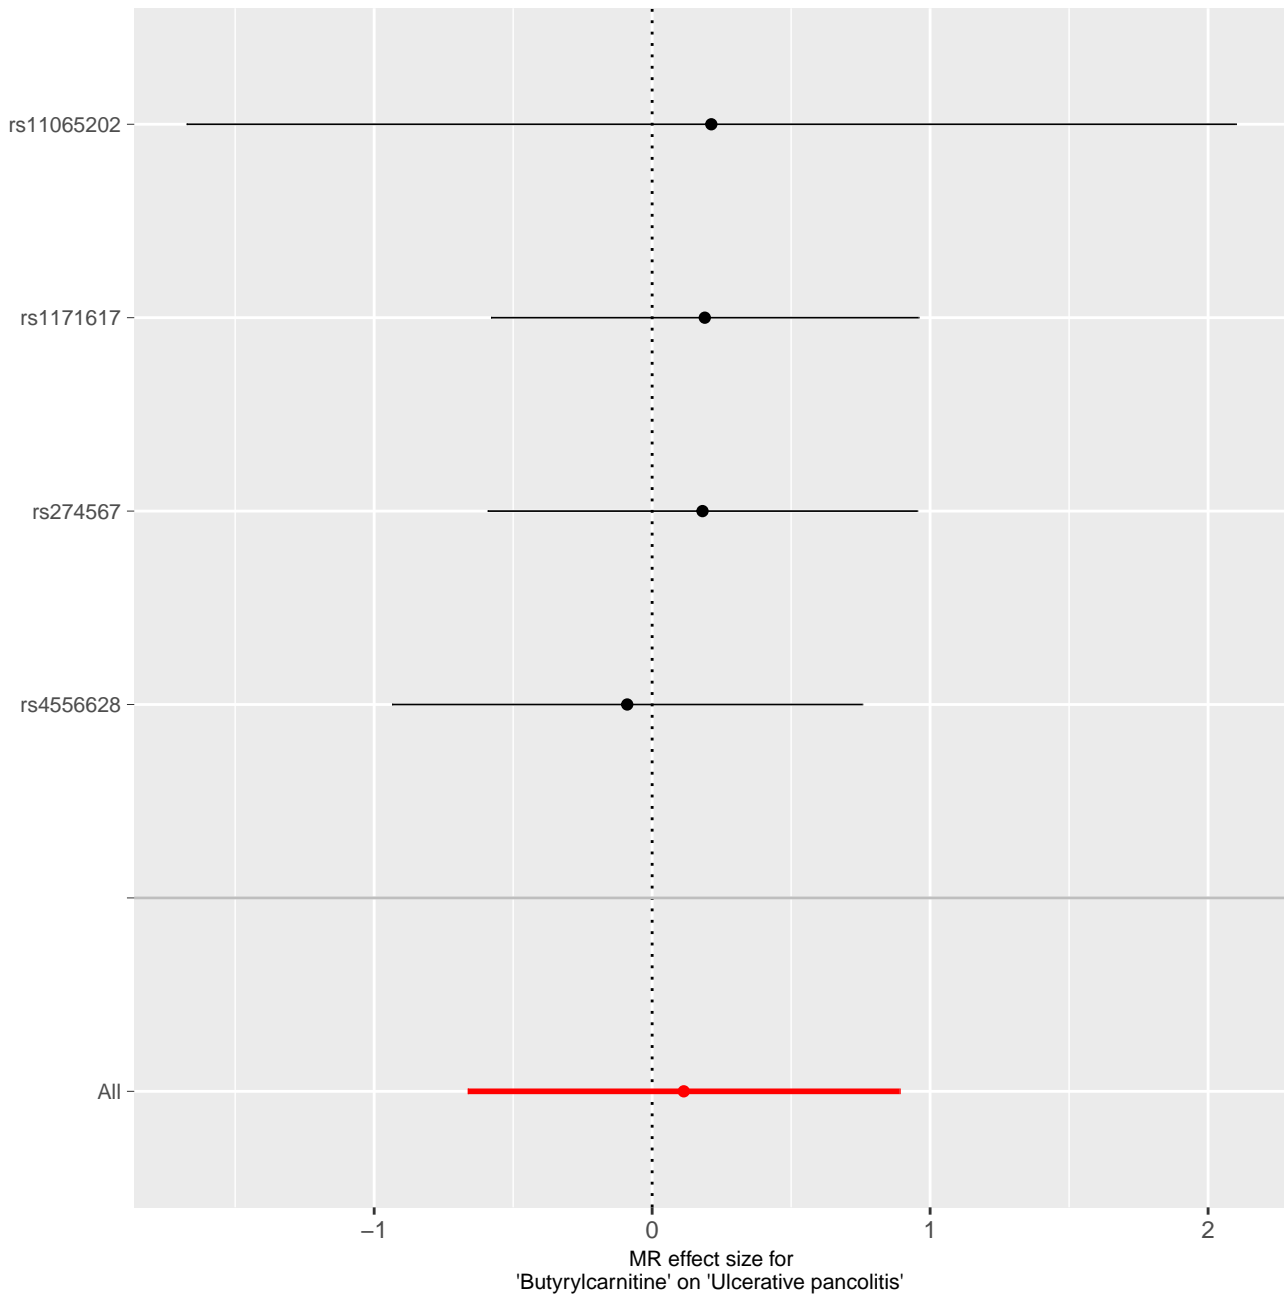

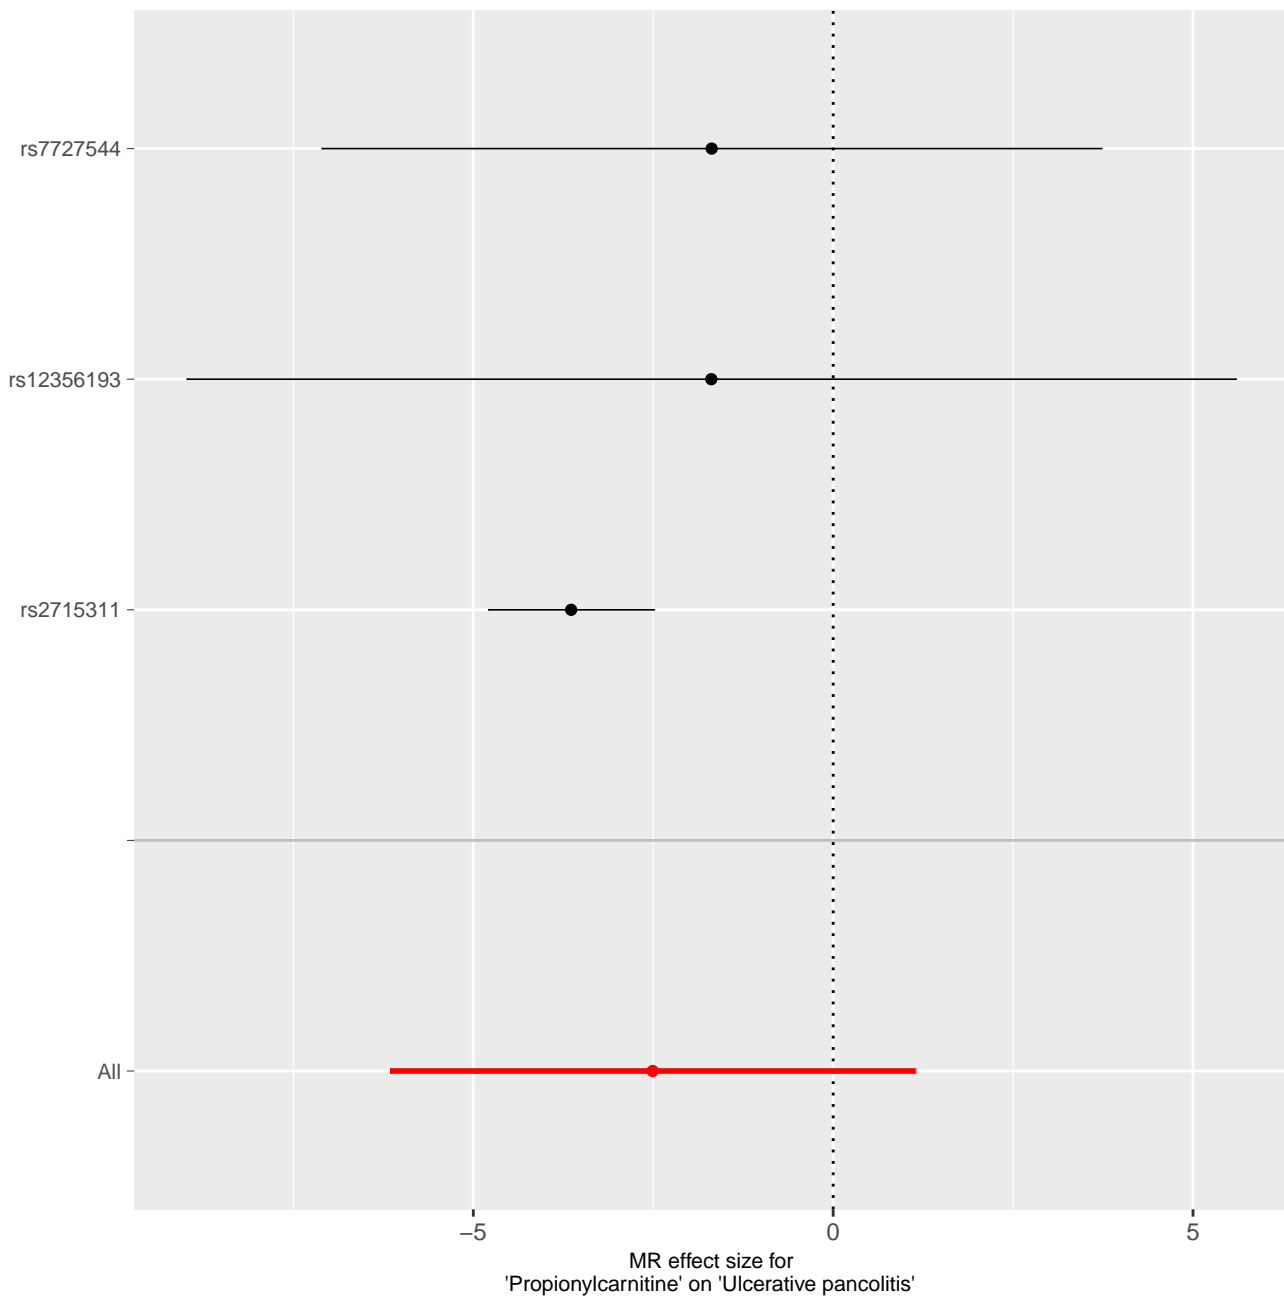

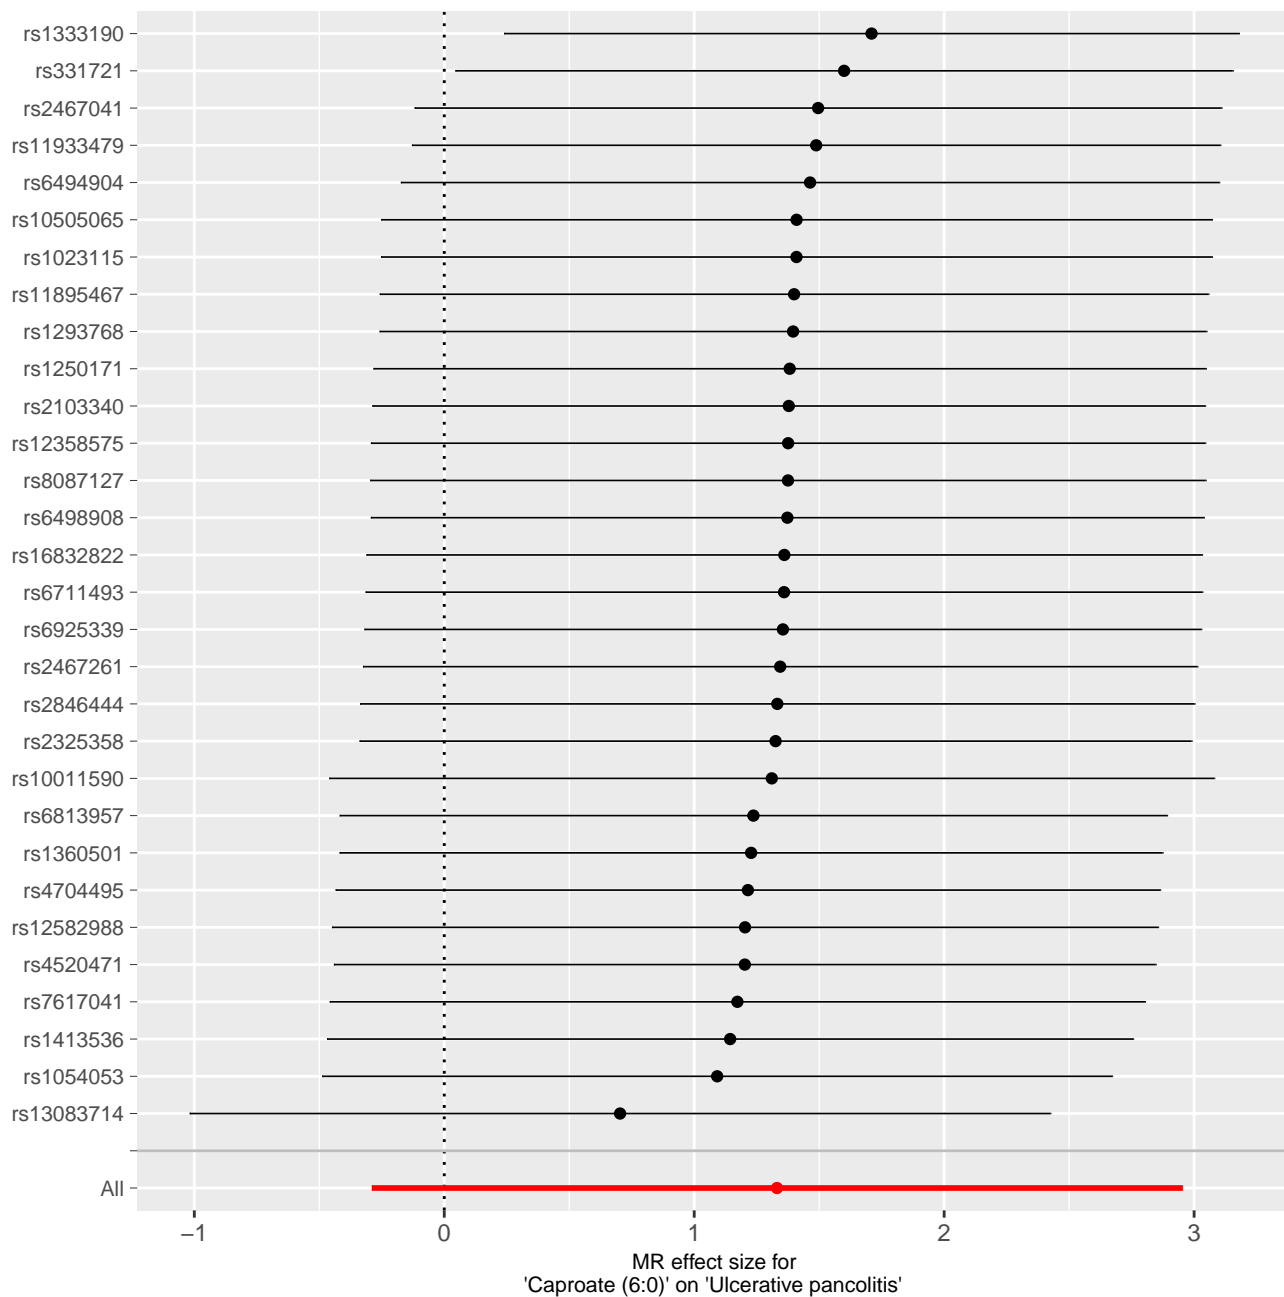

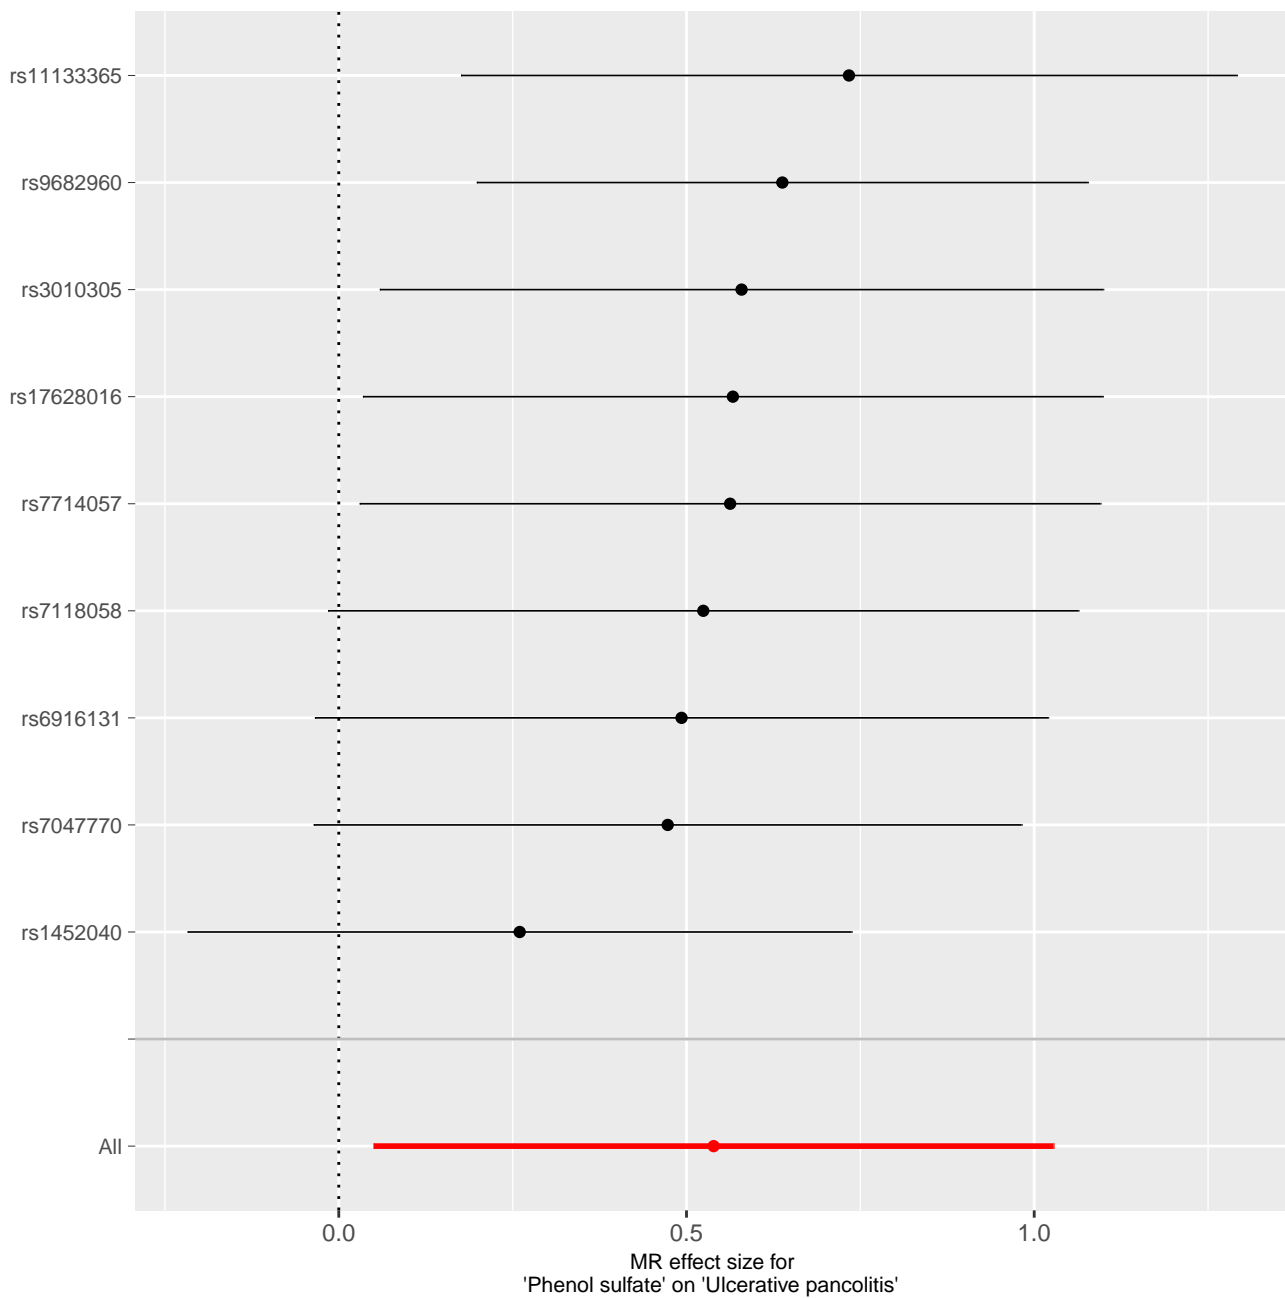

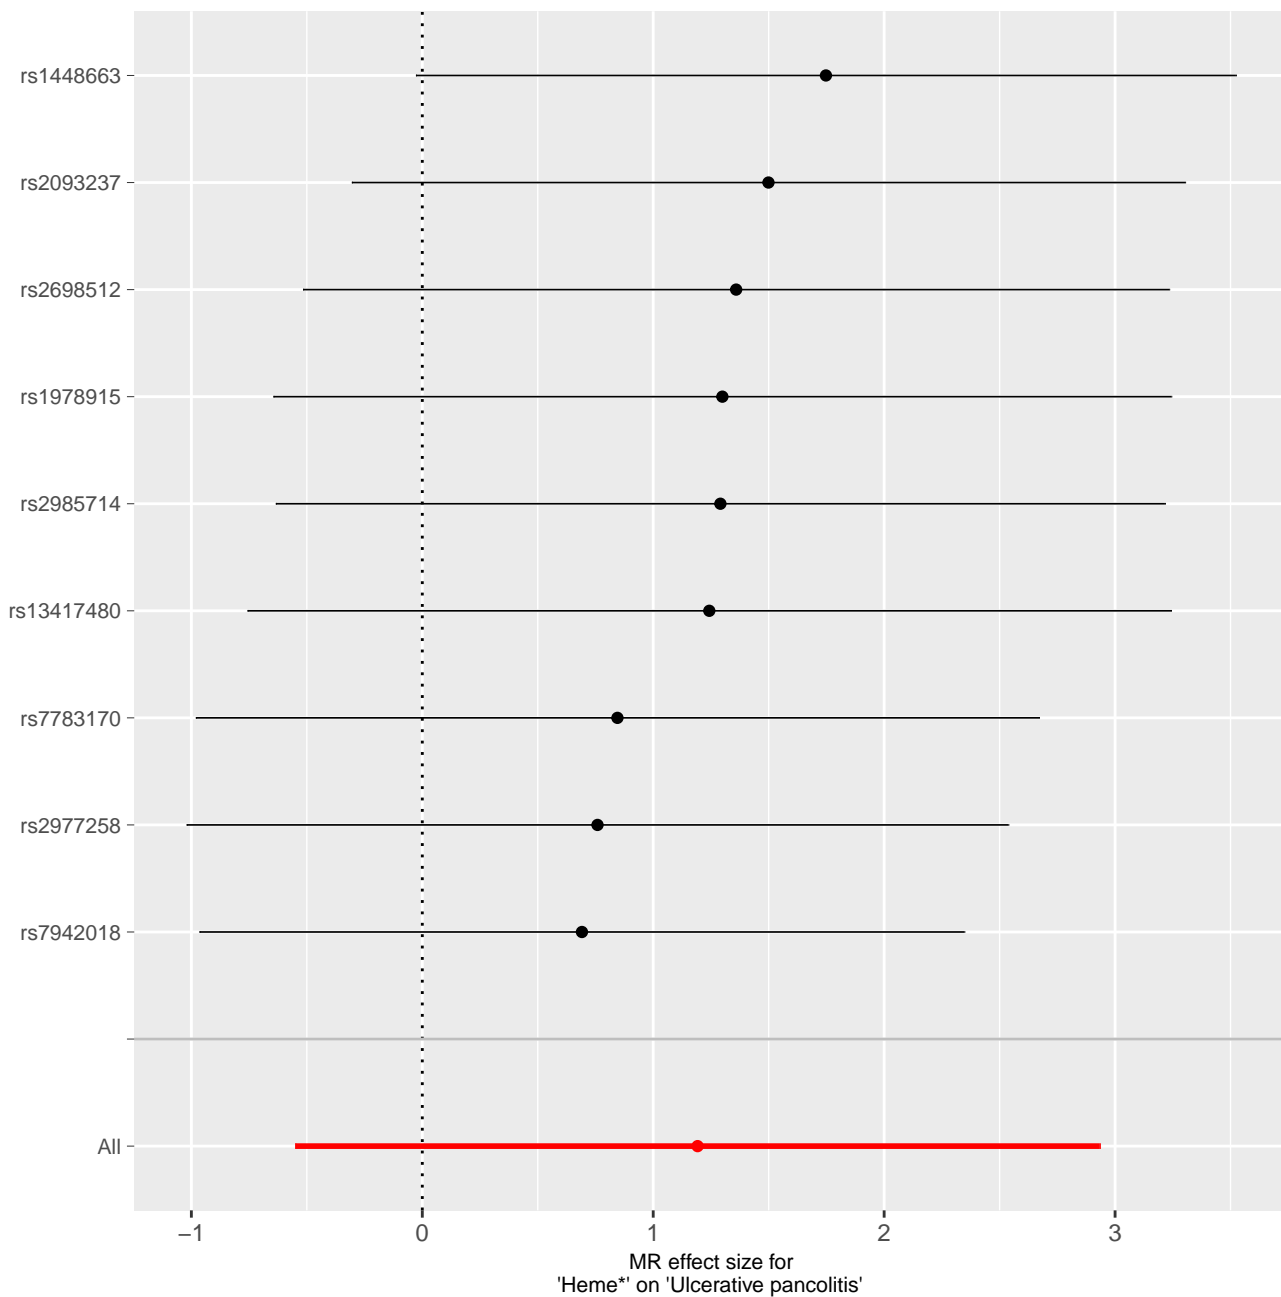

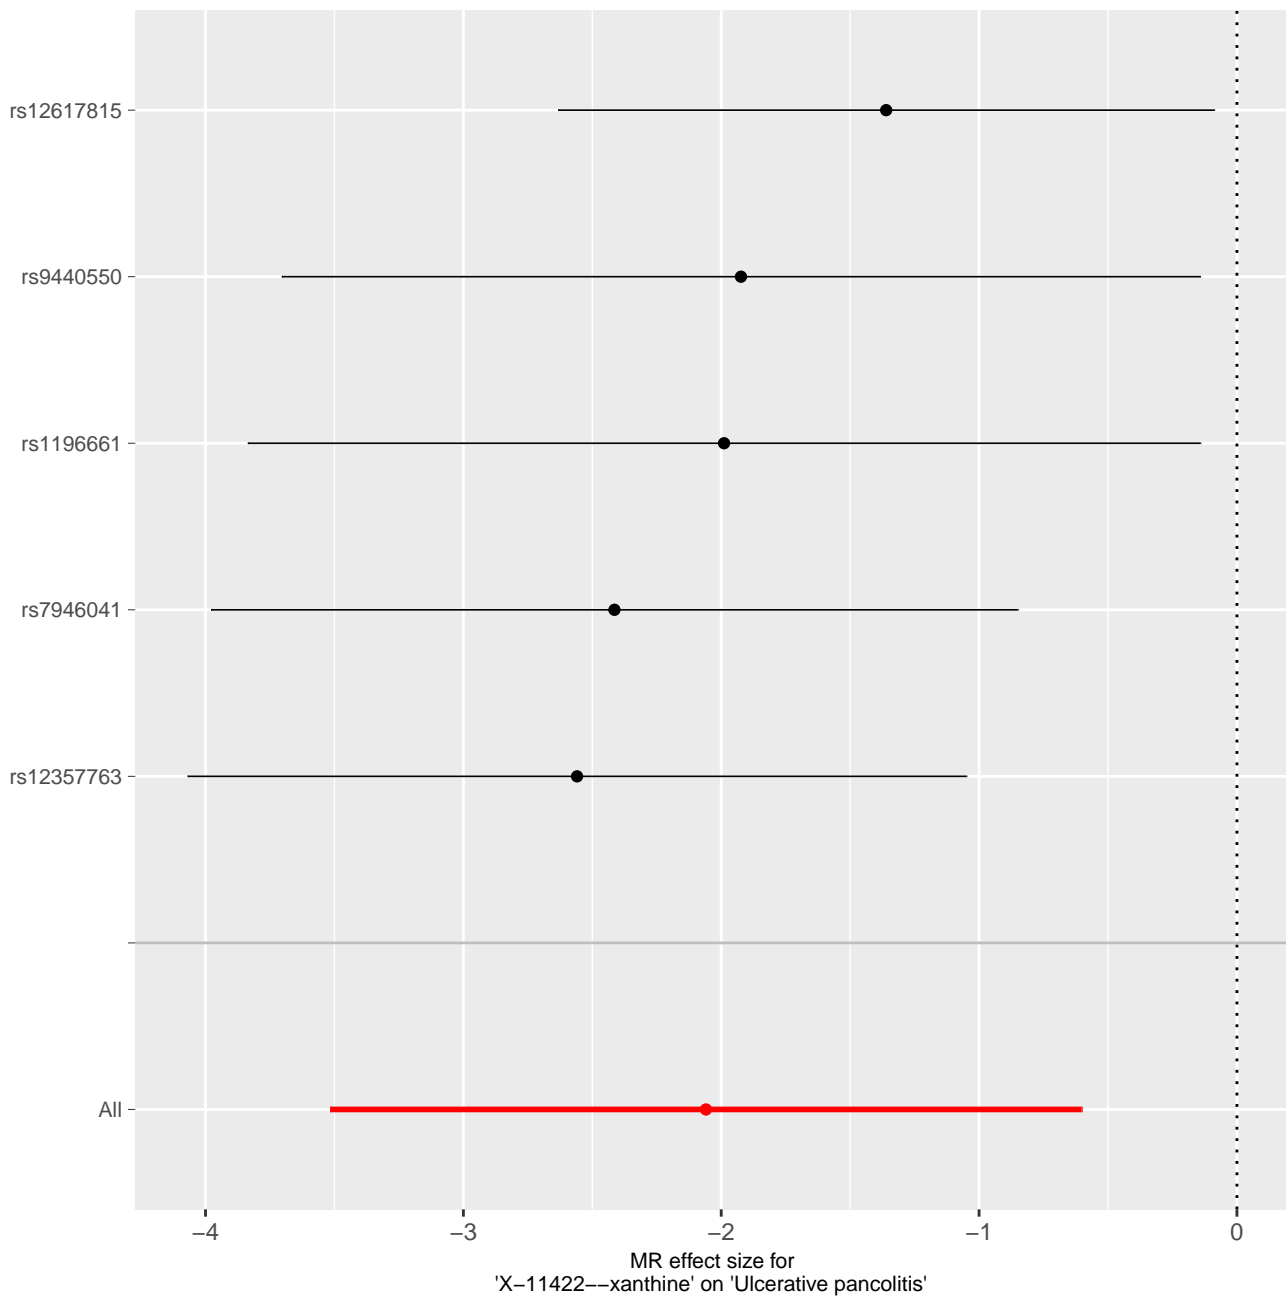

Batch 2089 : X-11593--O-methylascorbate\* on Ulcerative pancolitis

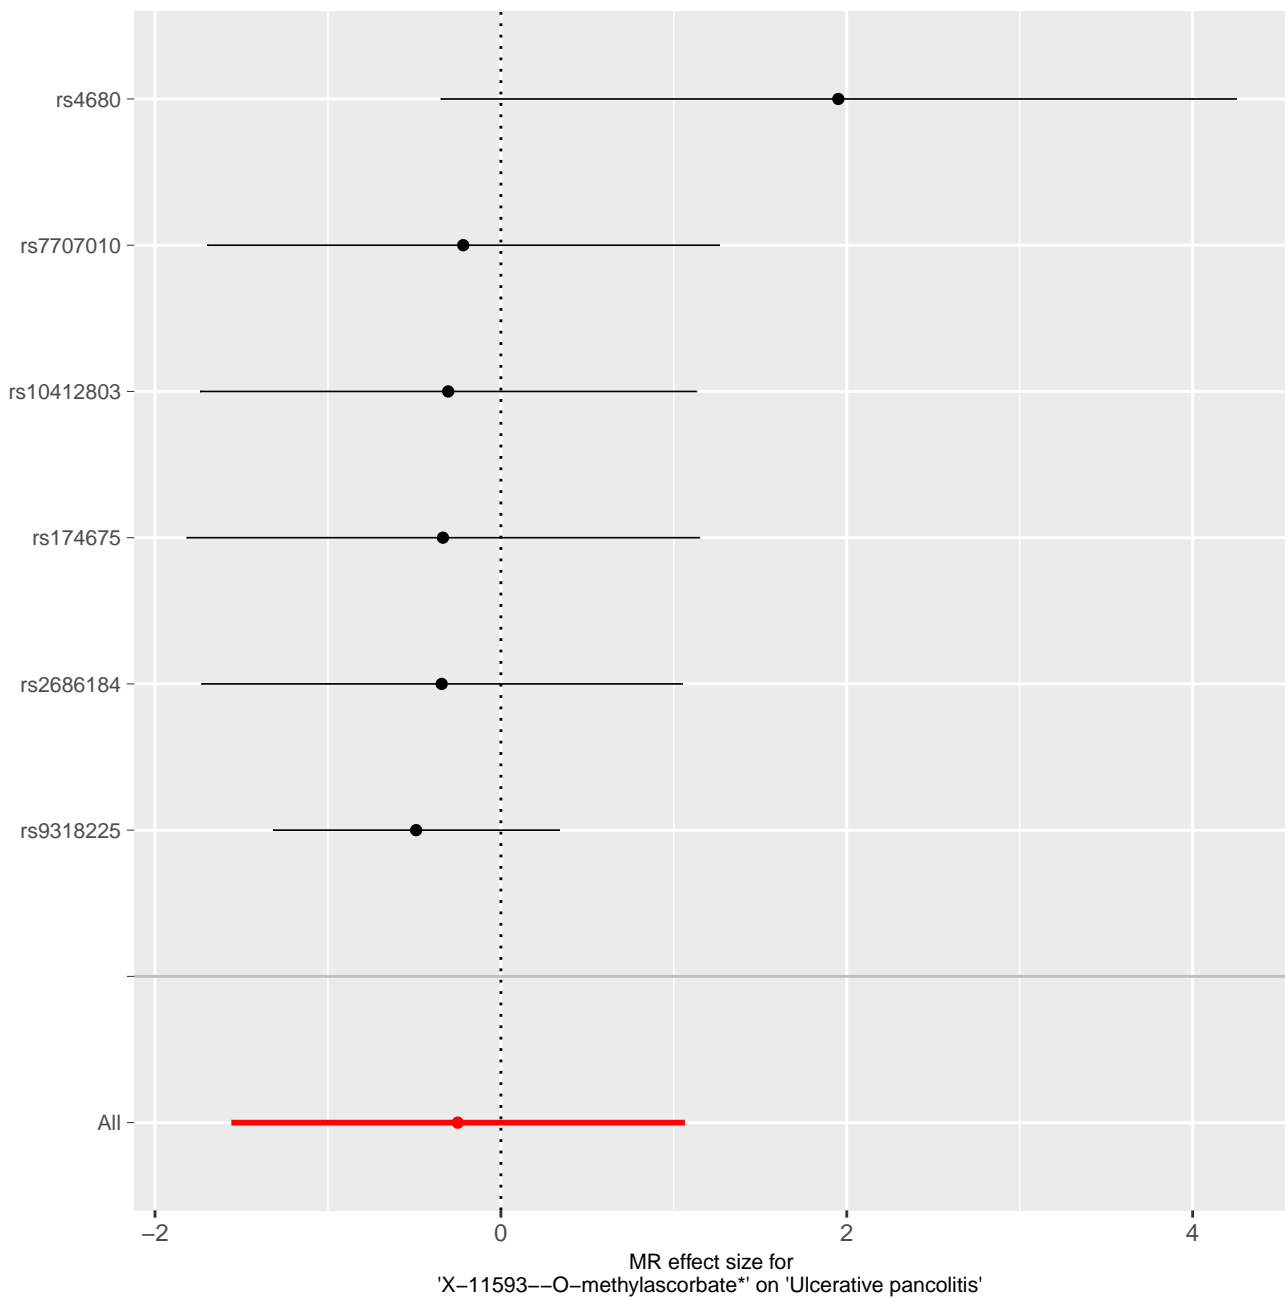



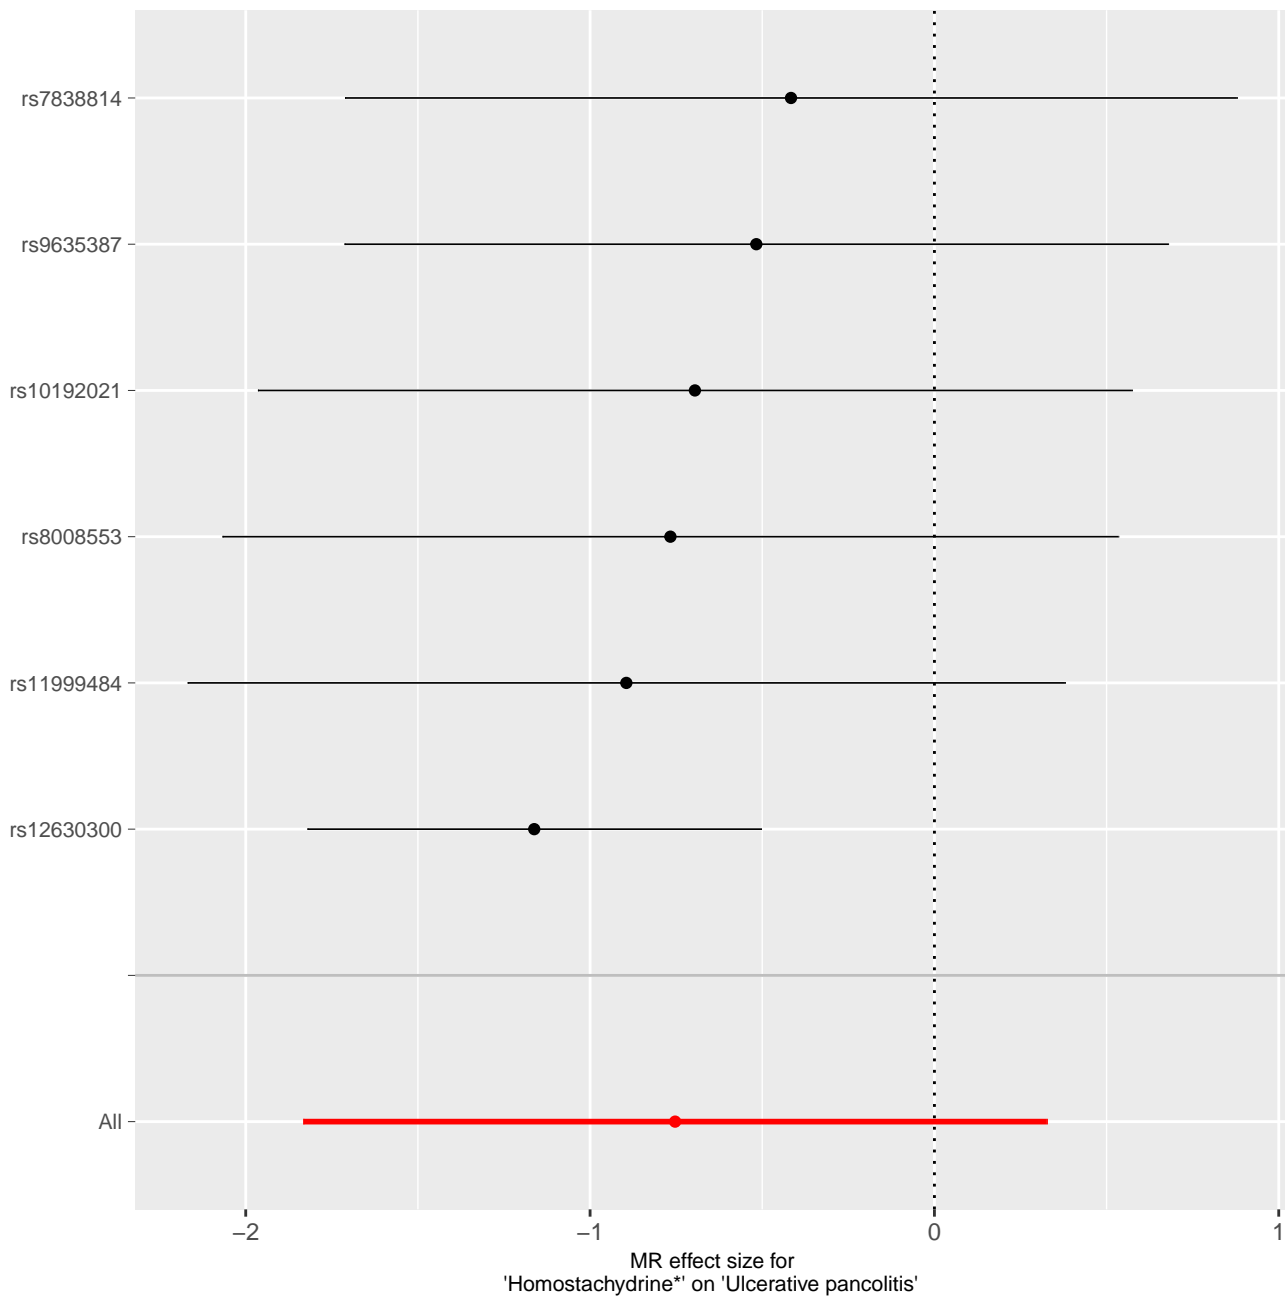

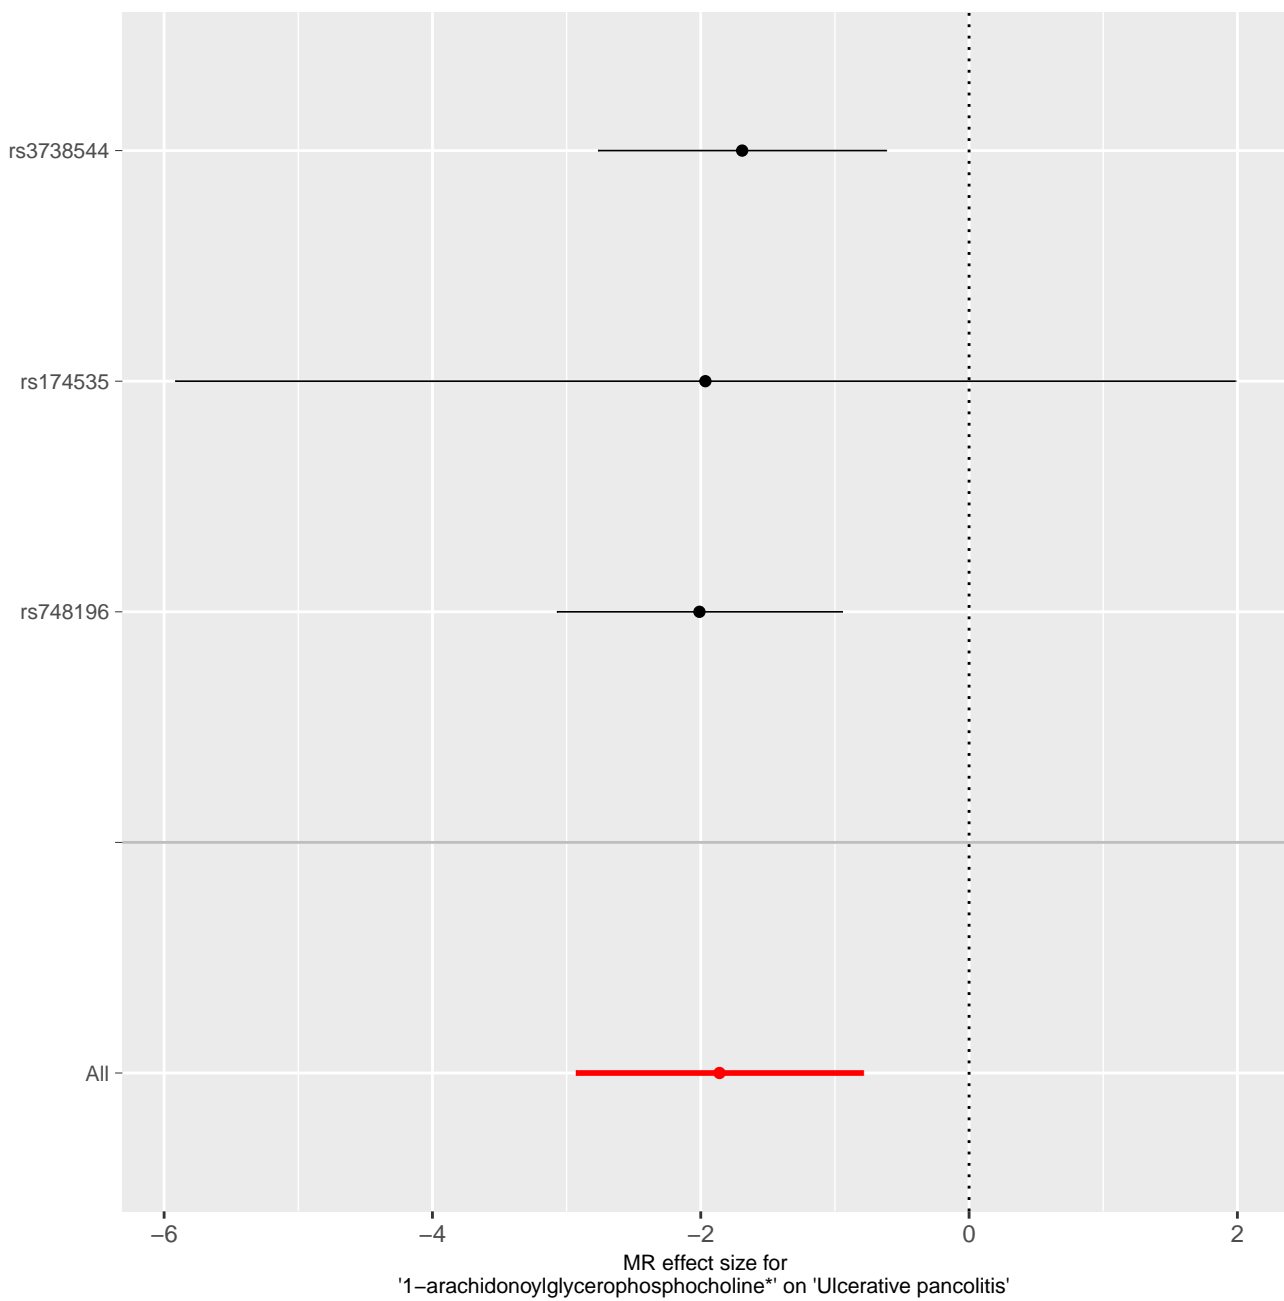

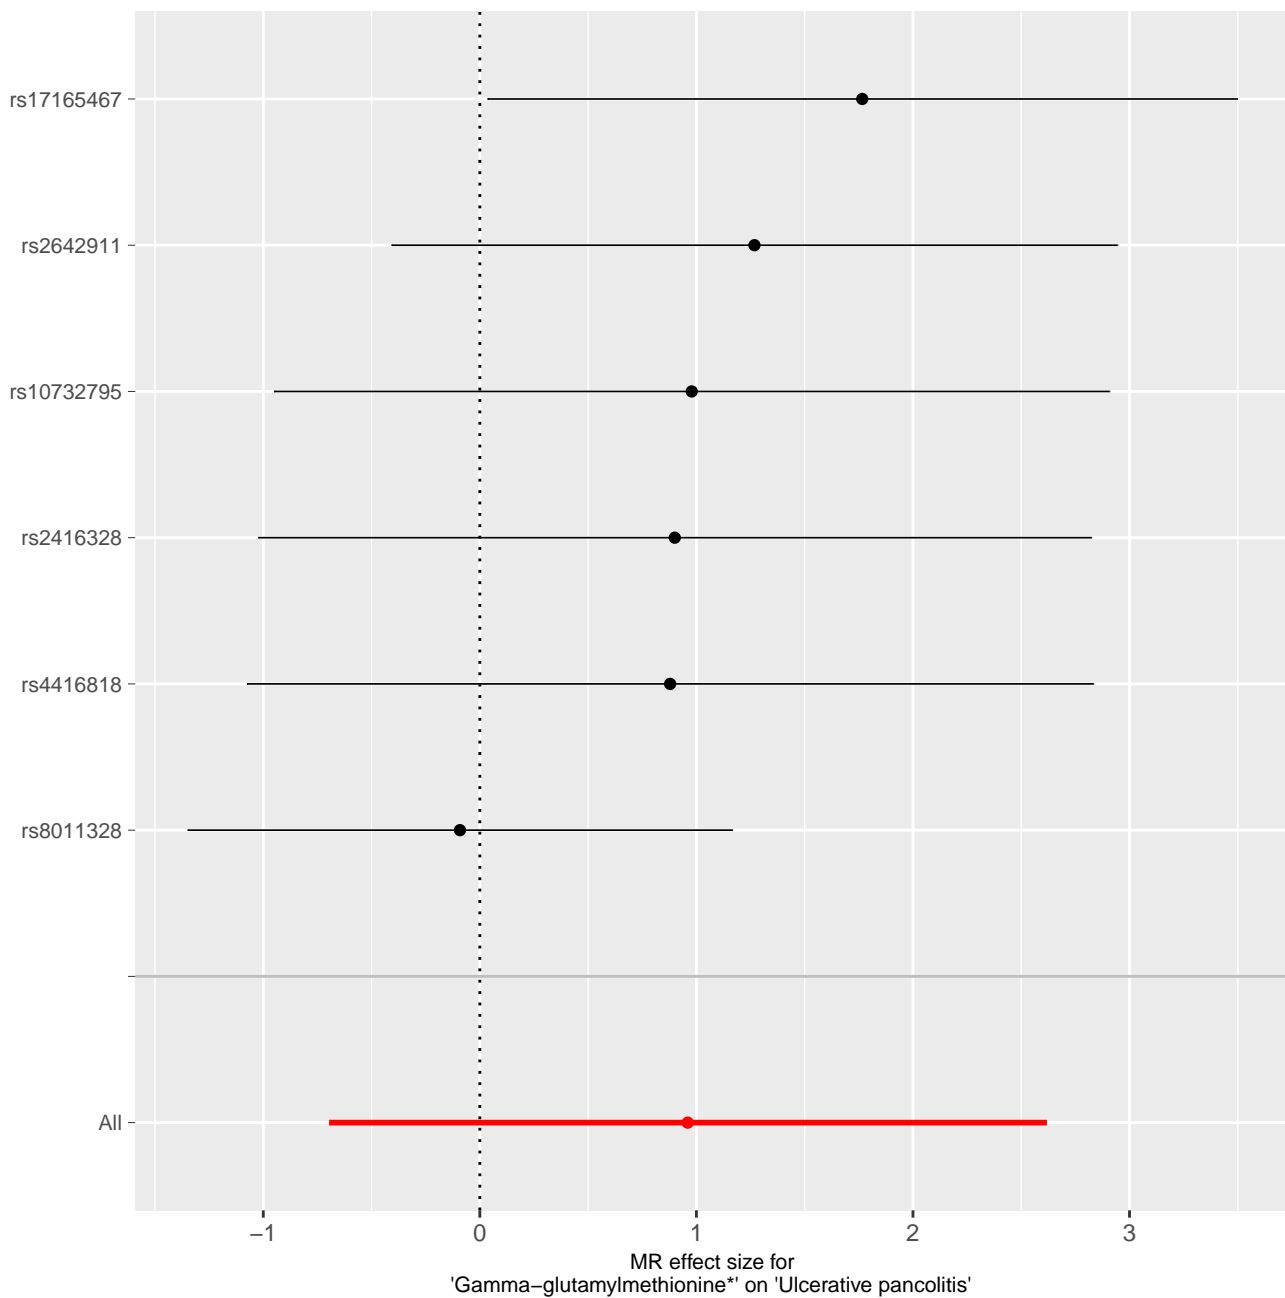

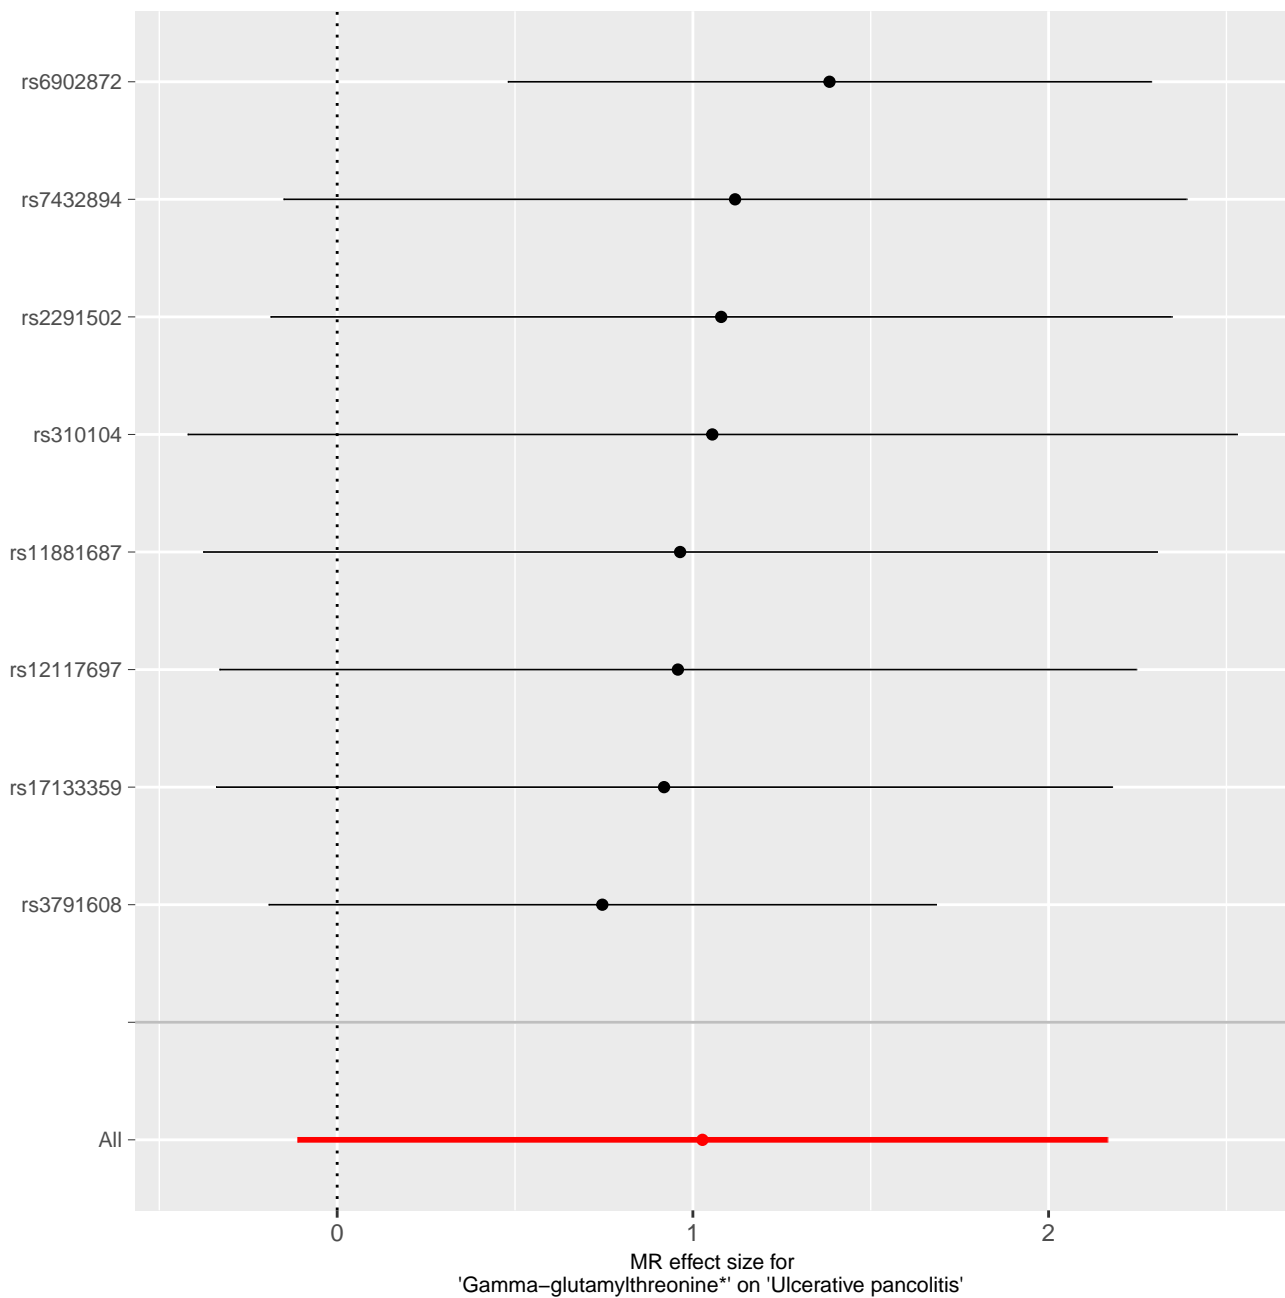

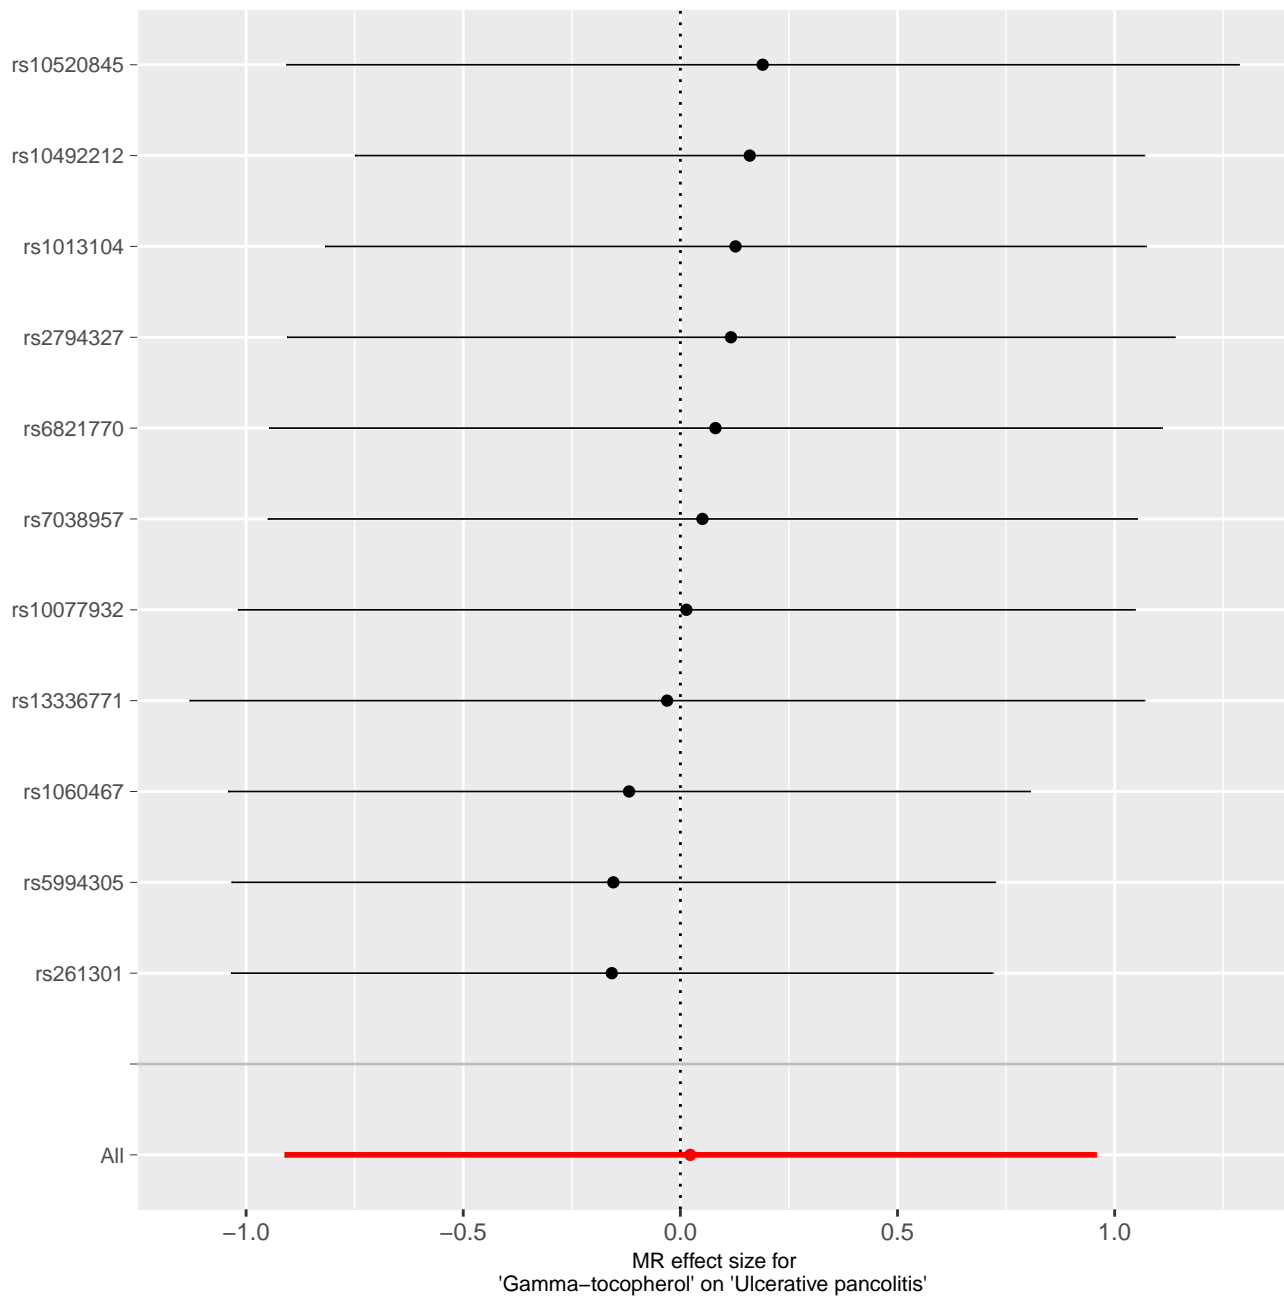

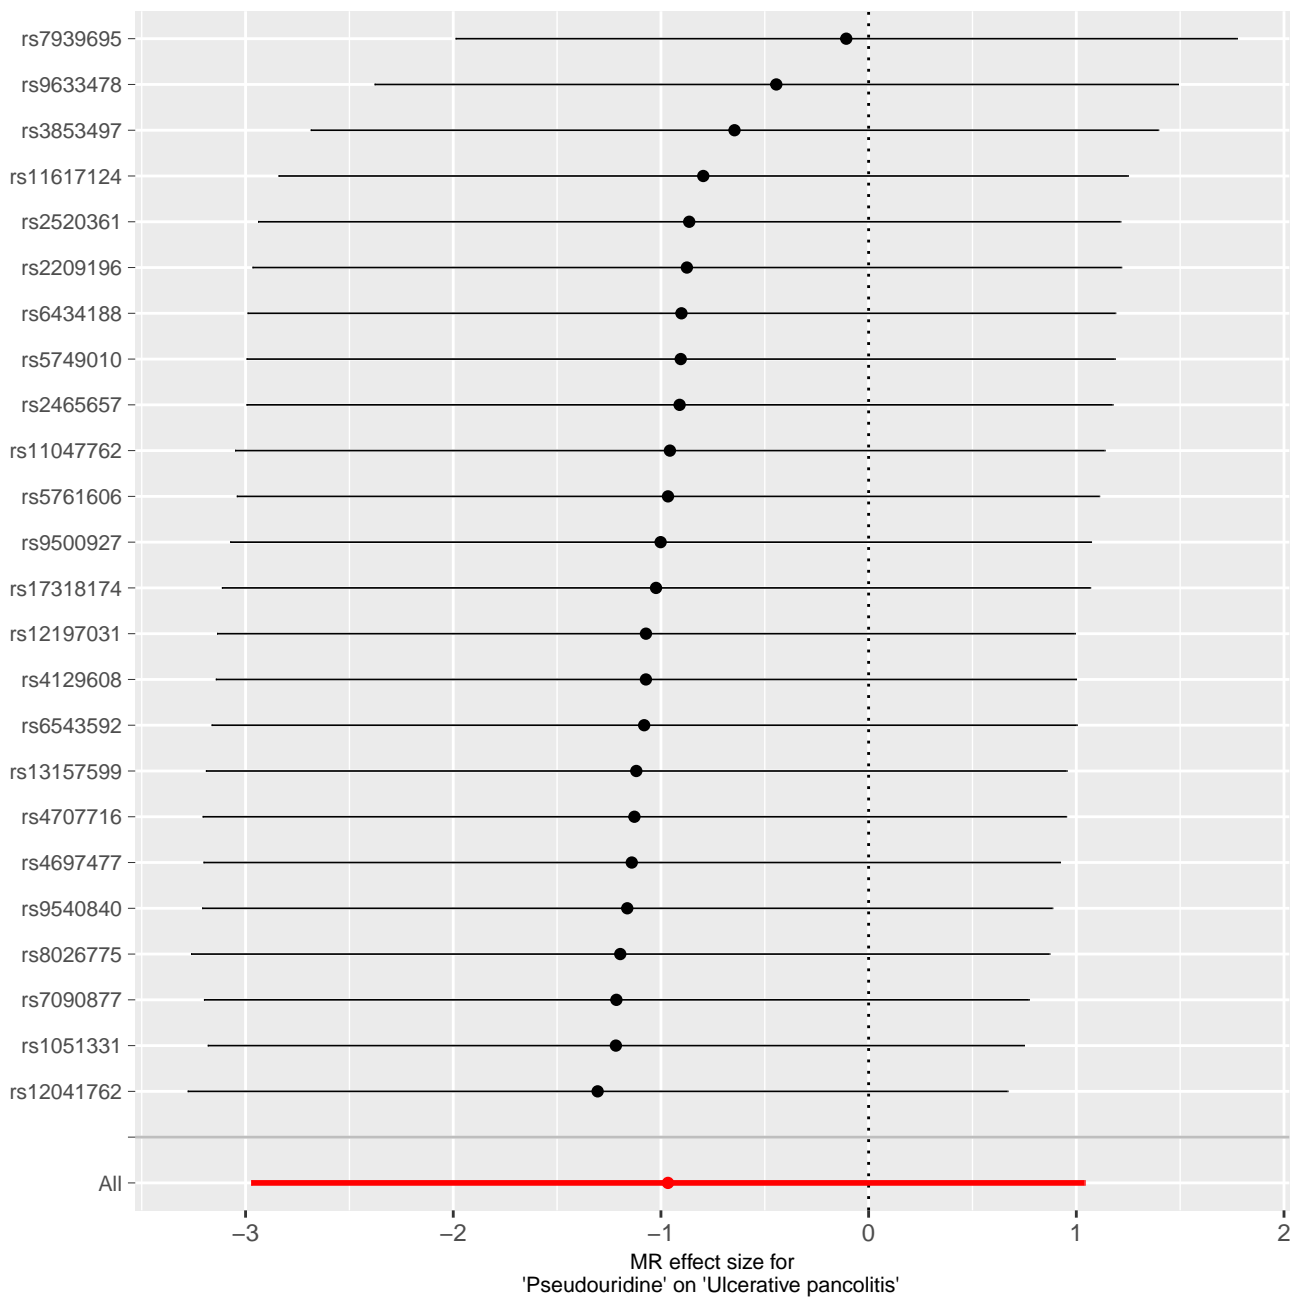

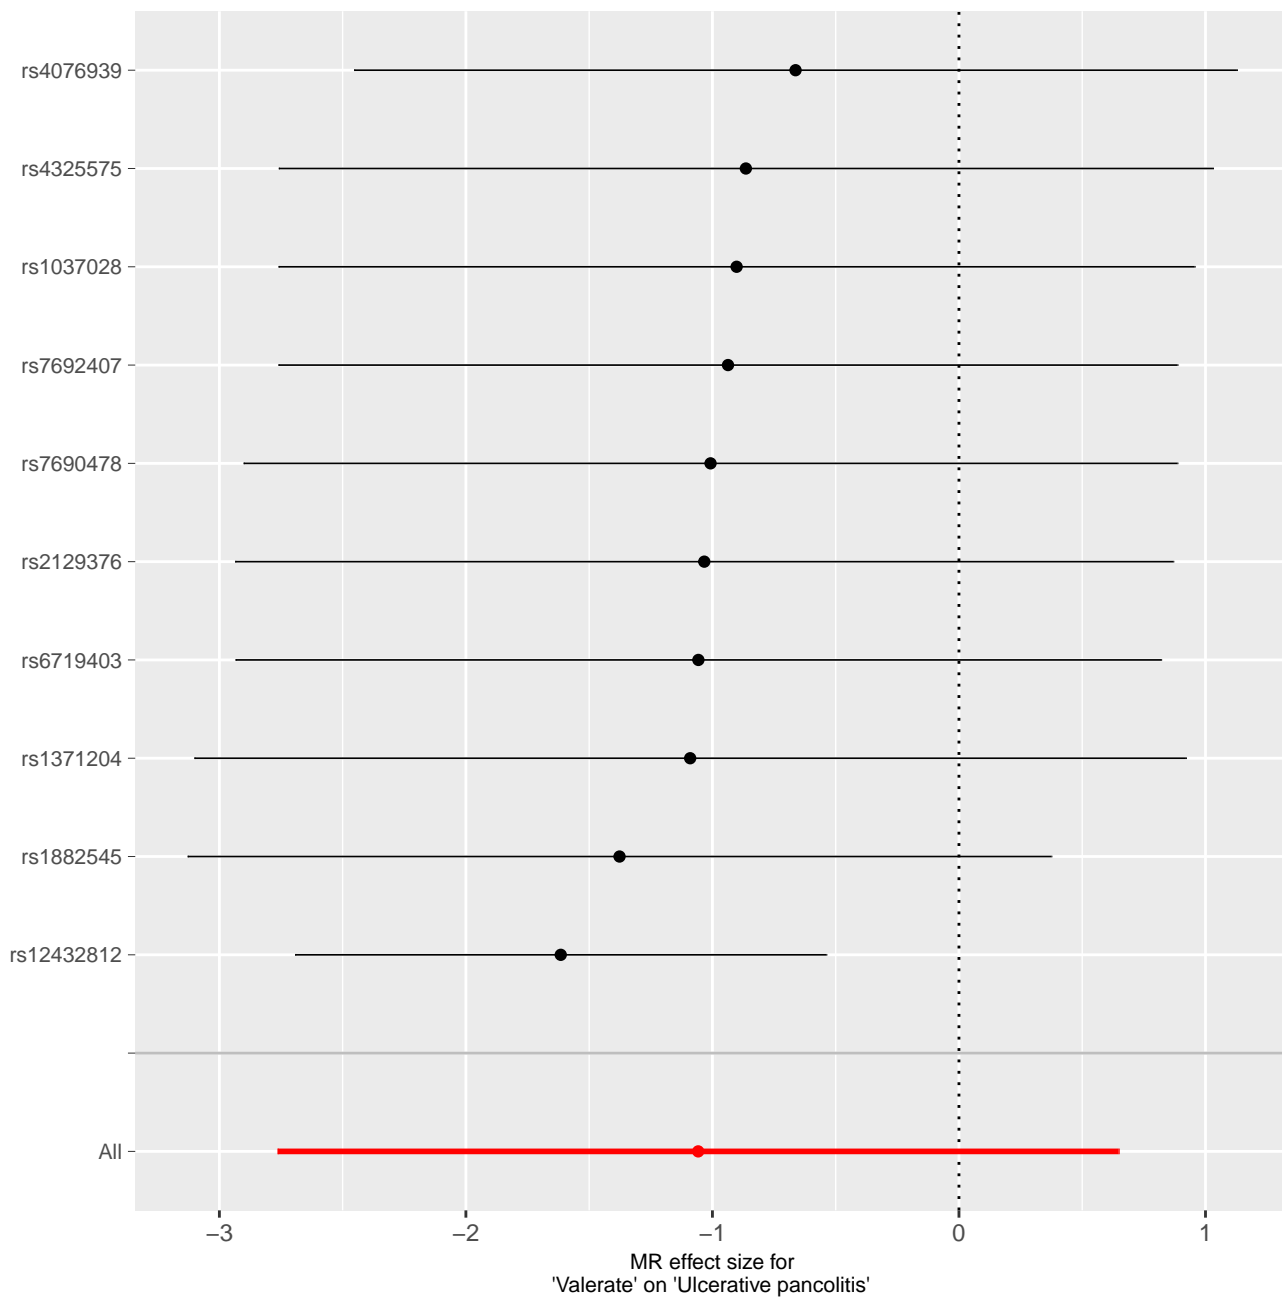

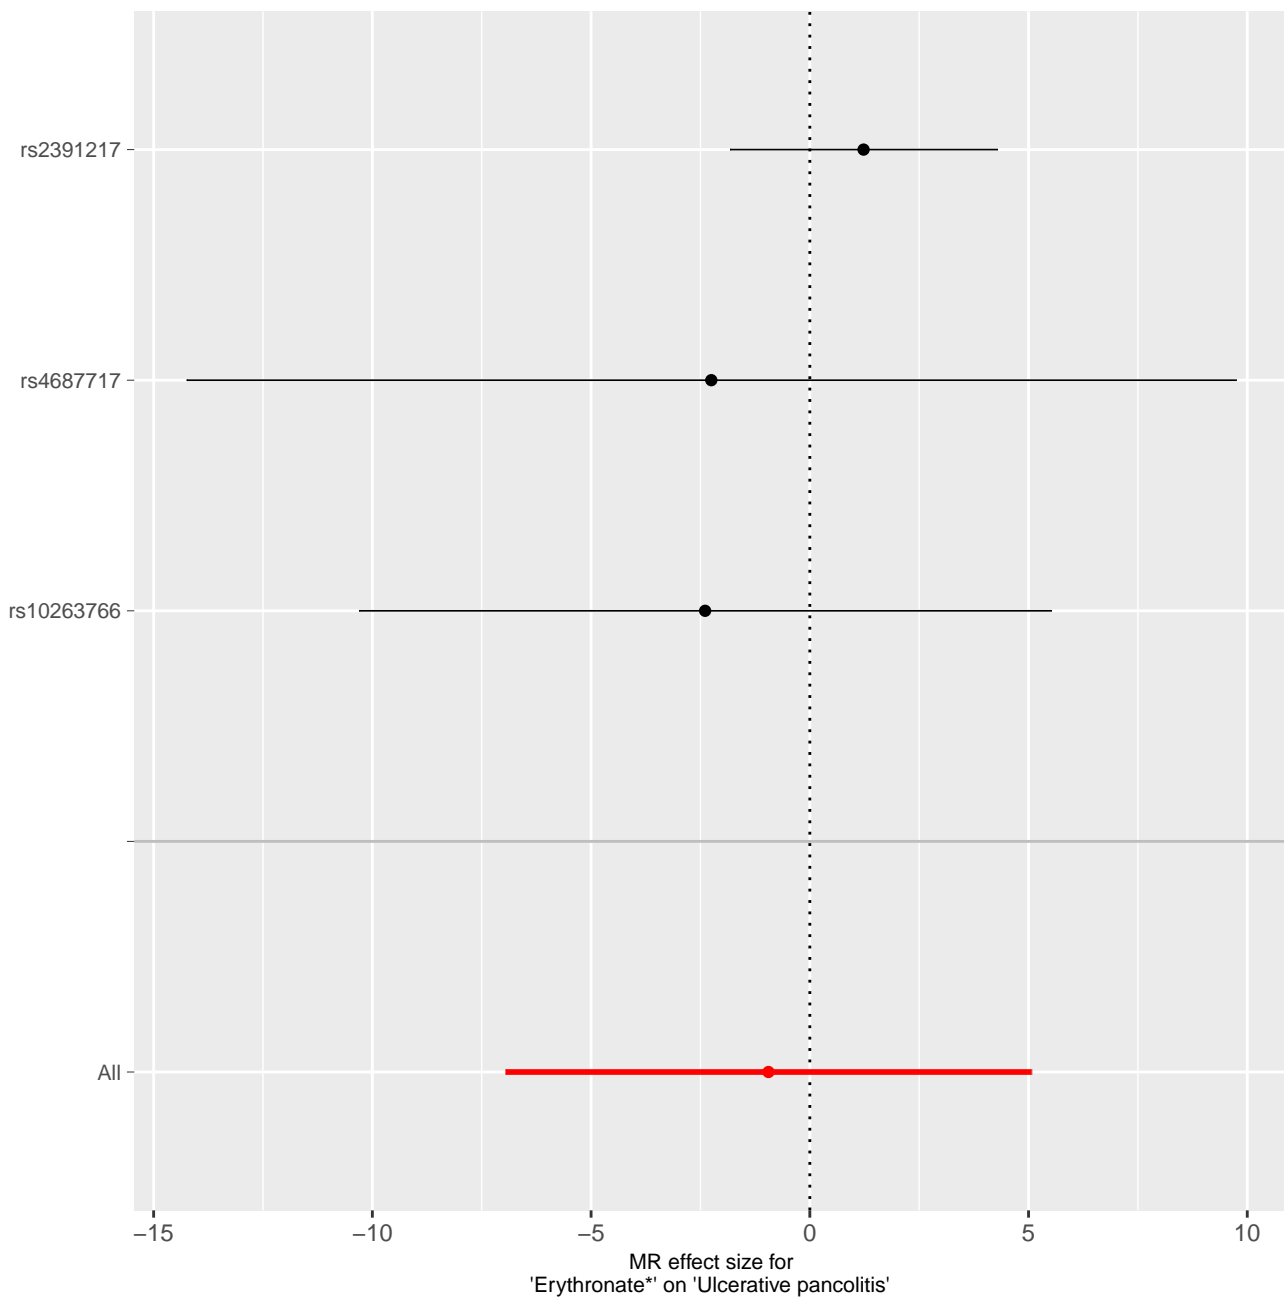



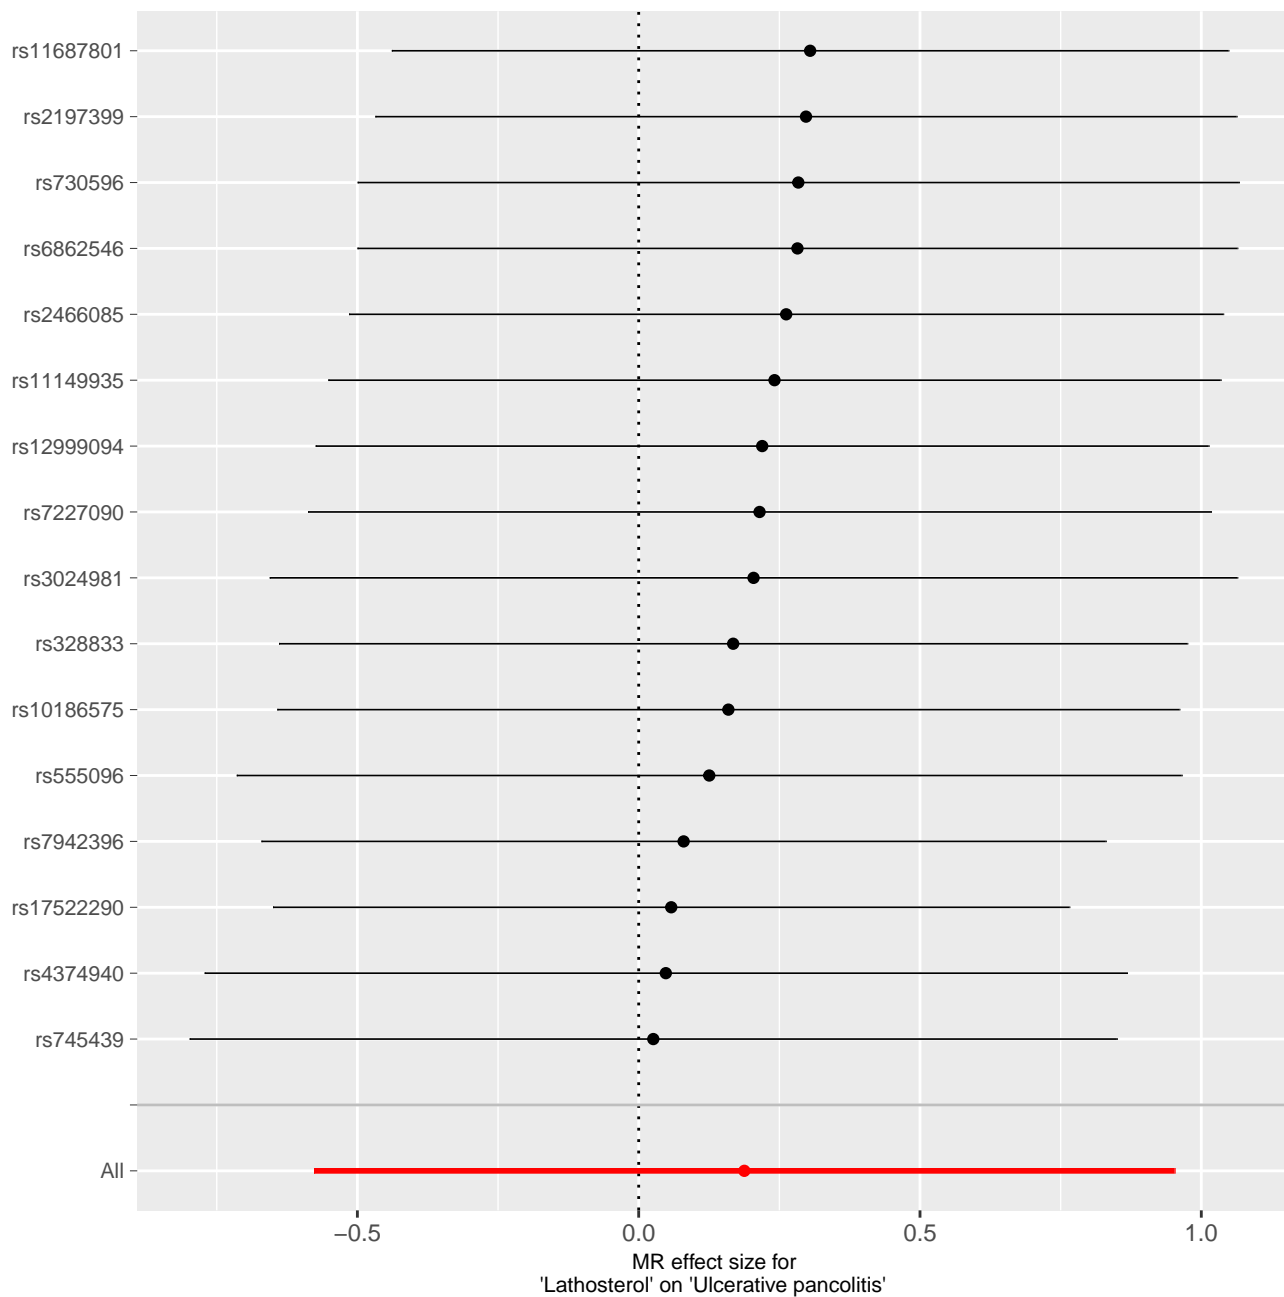

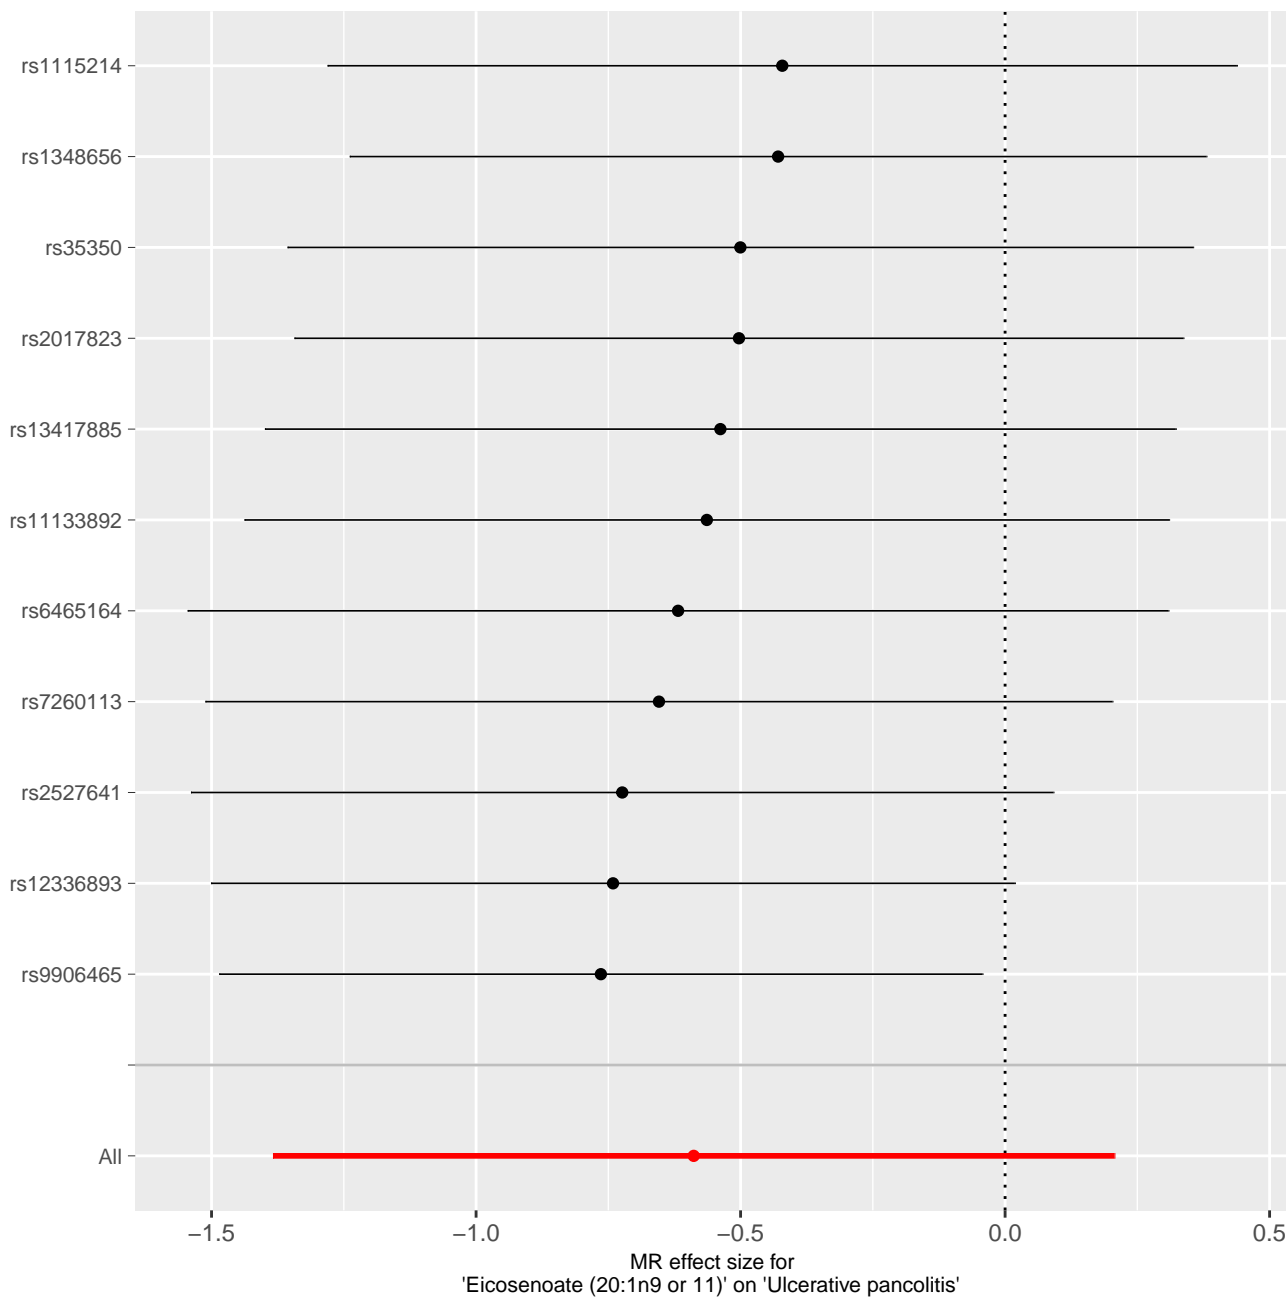

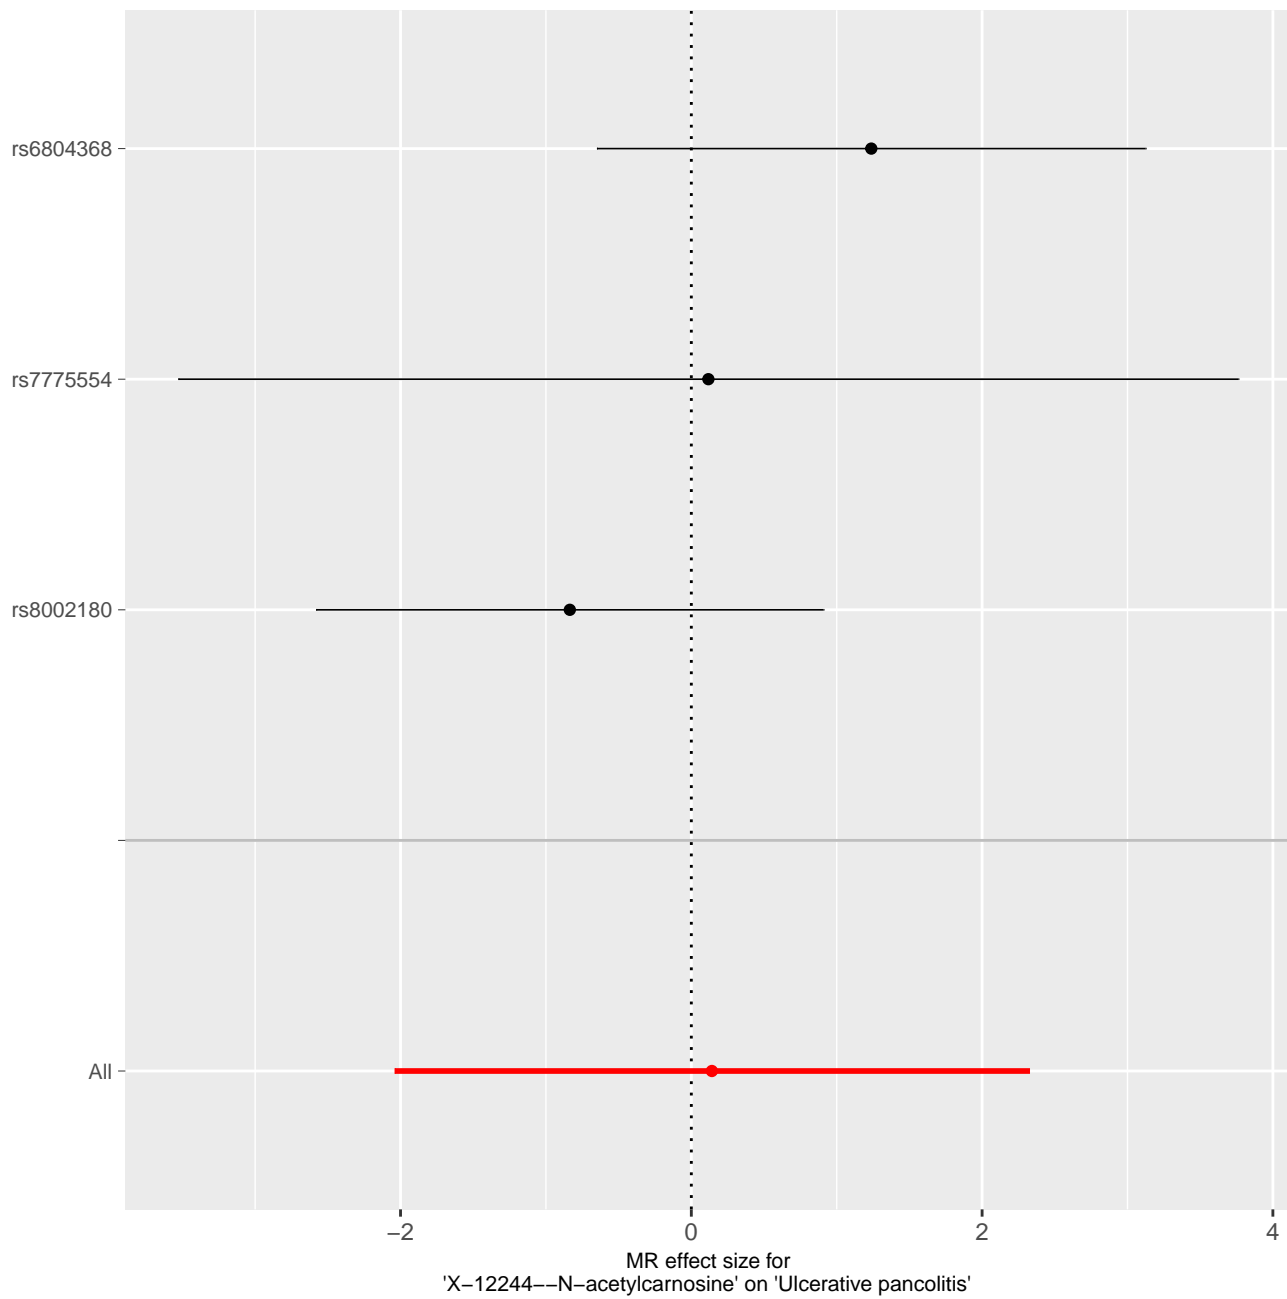

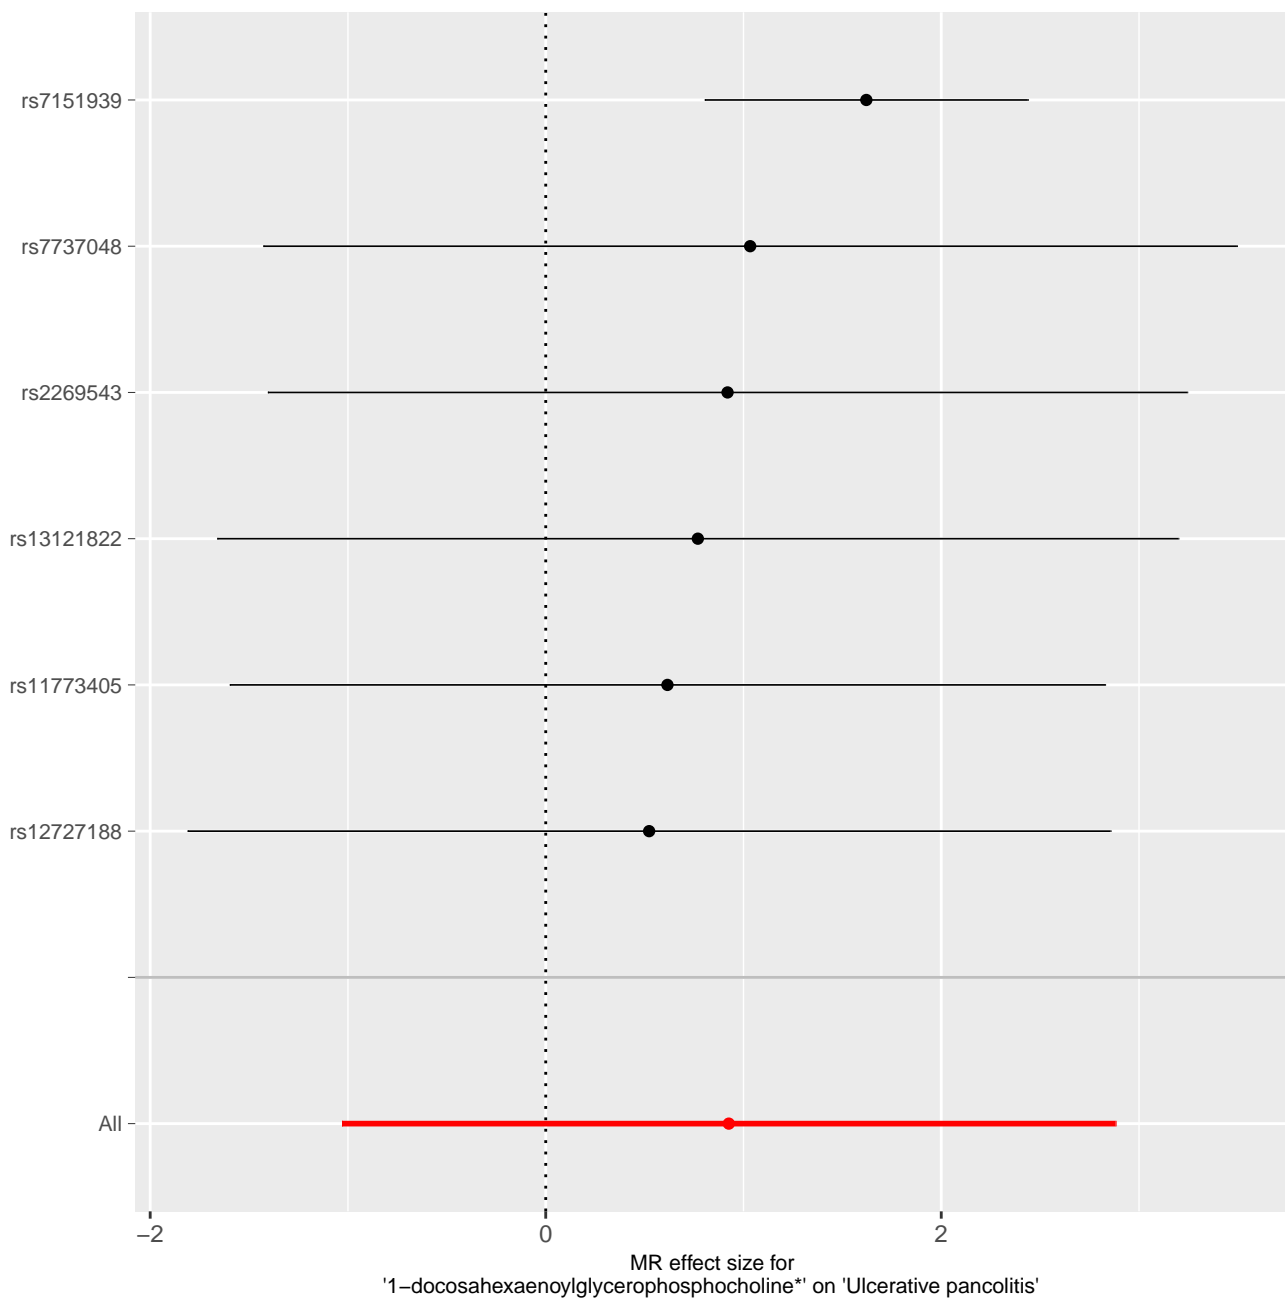

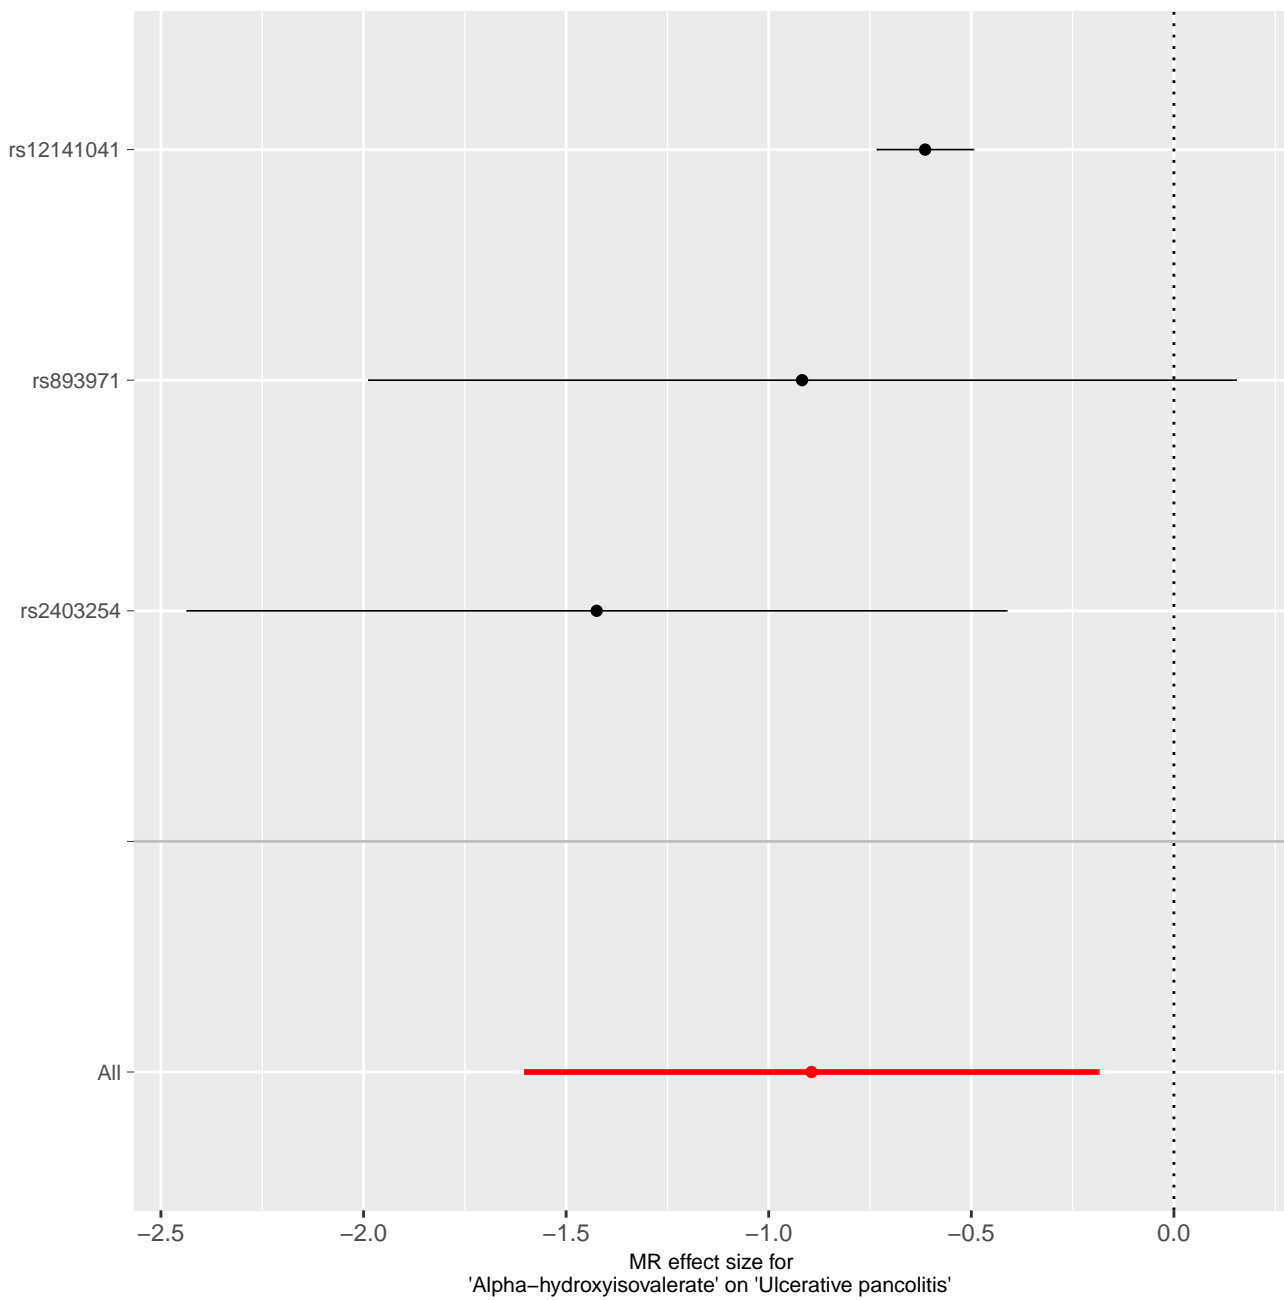

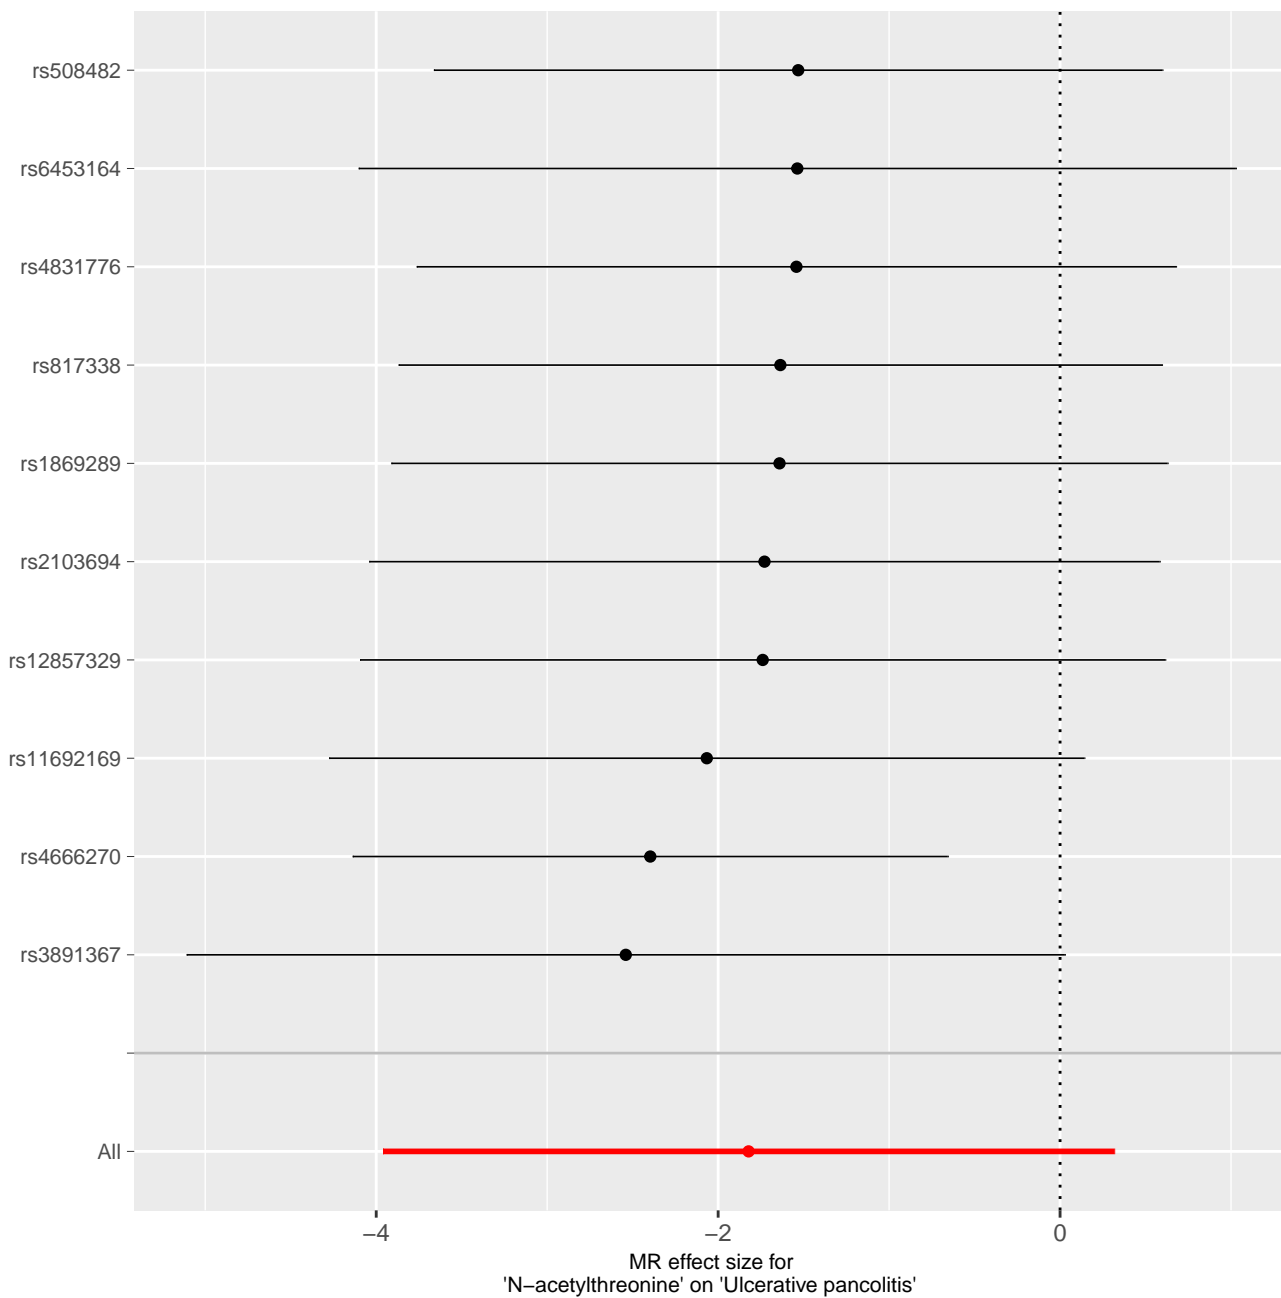

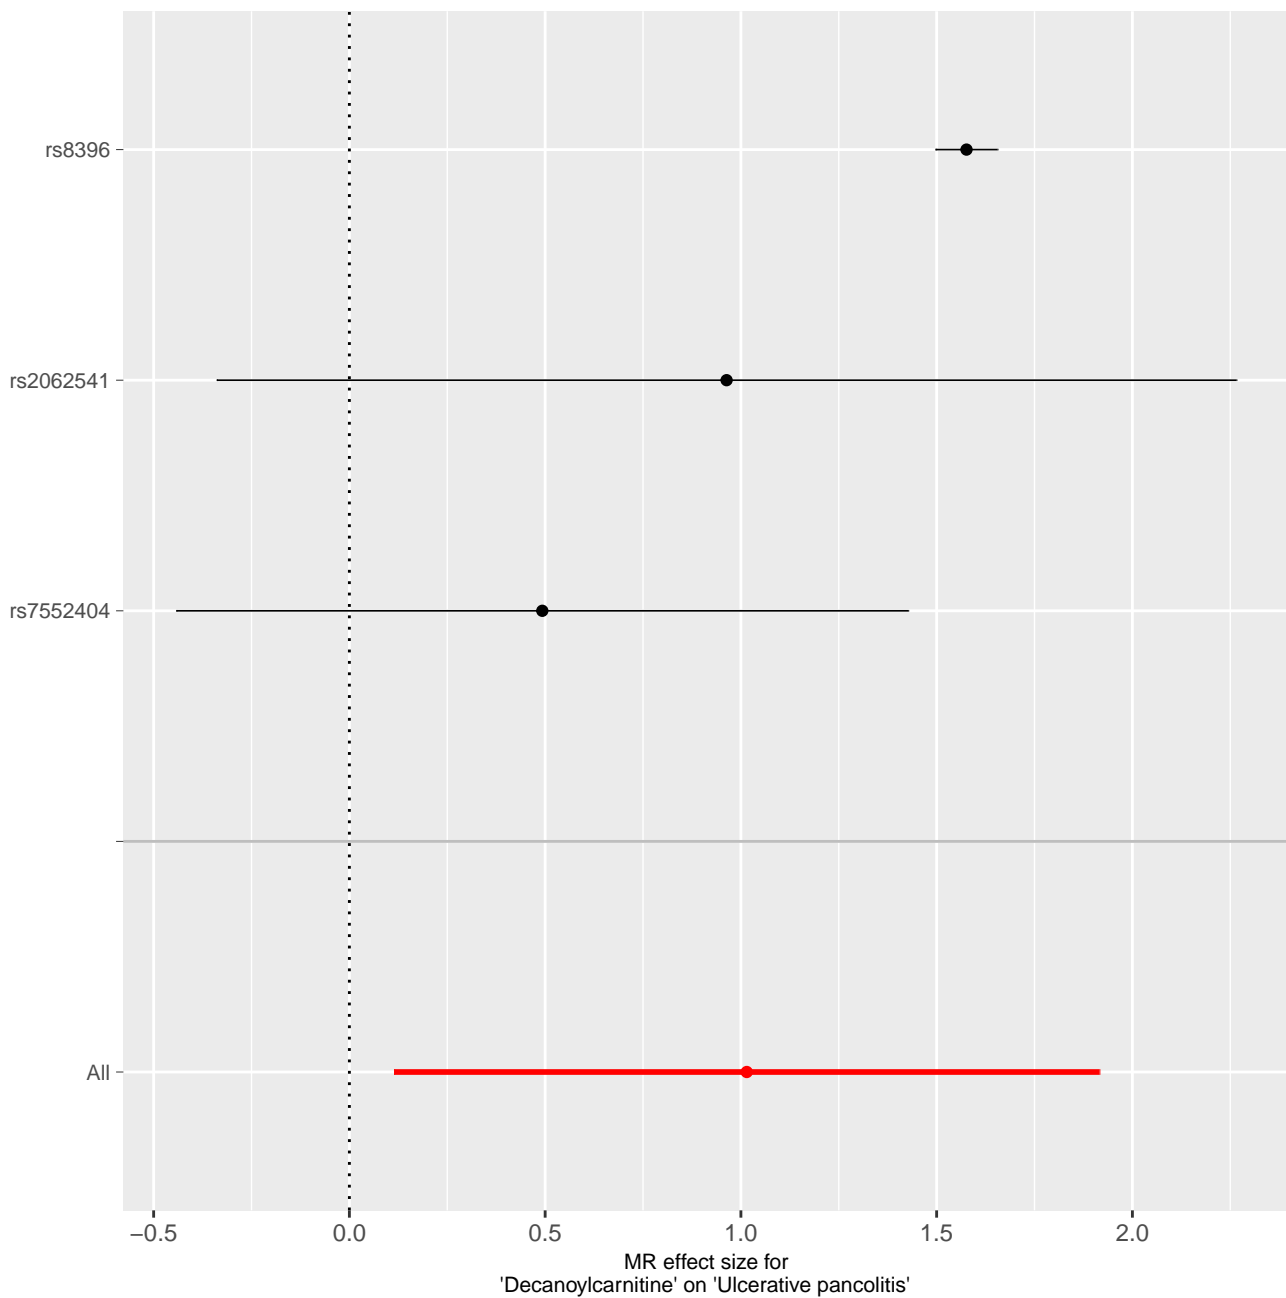

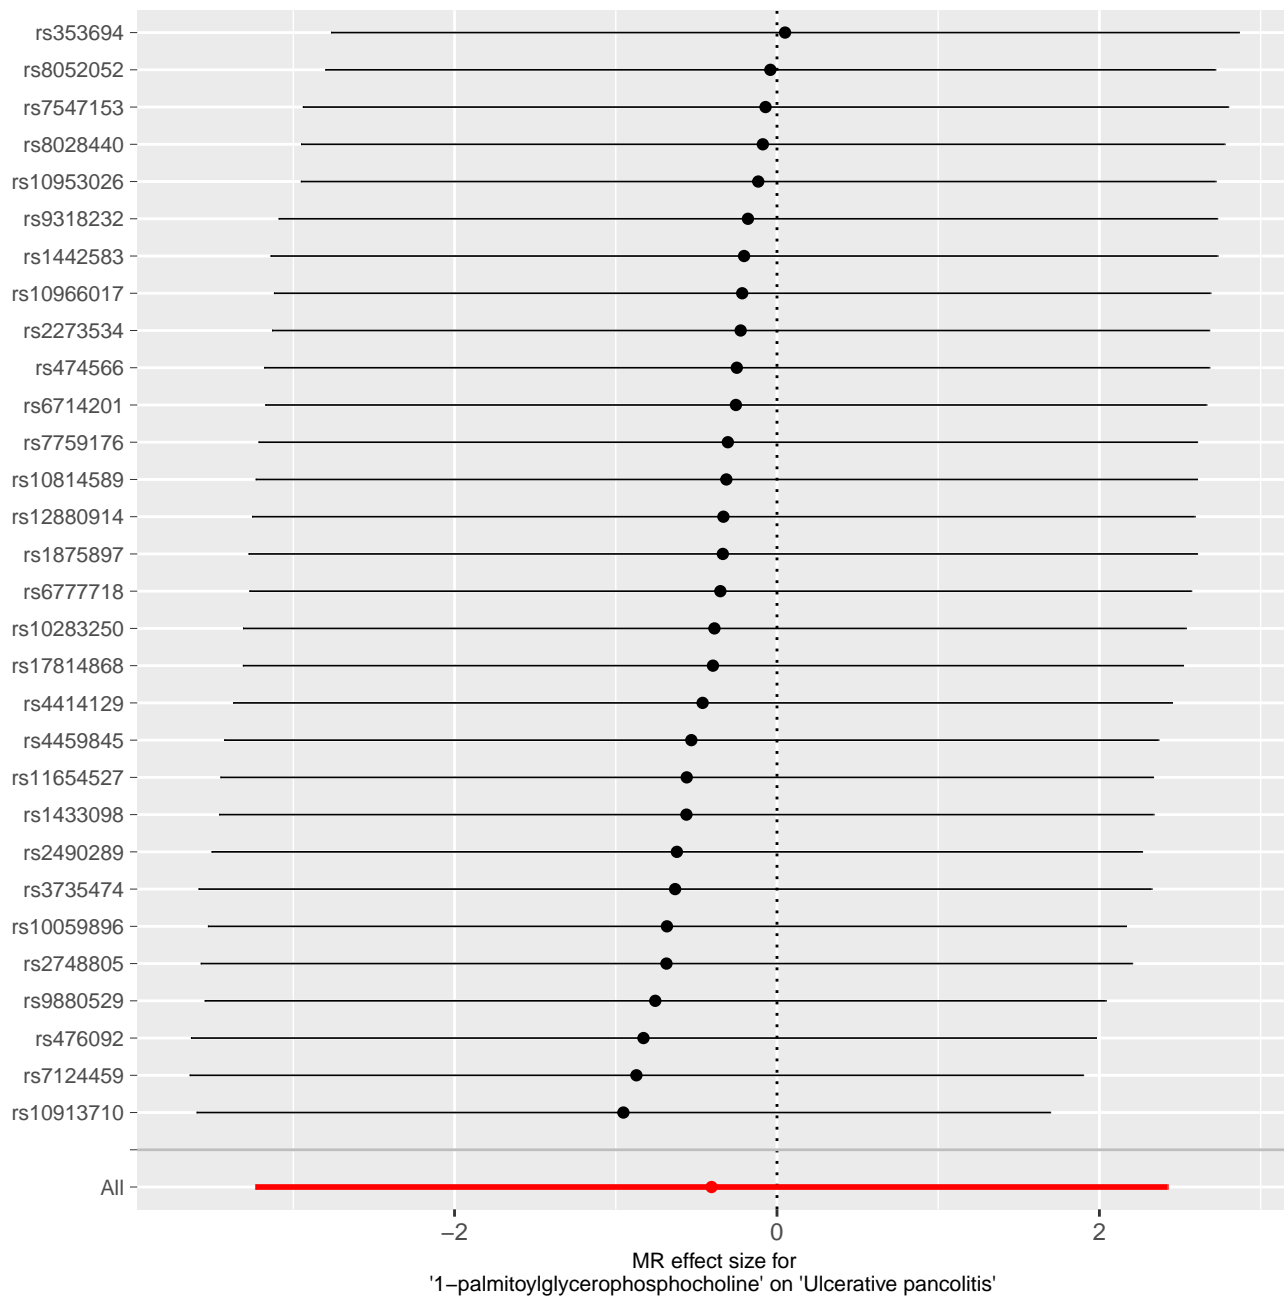



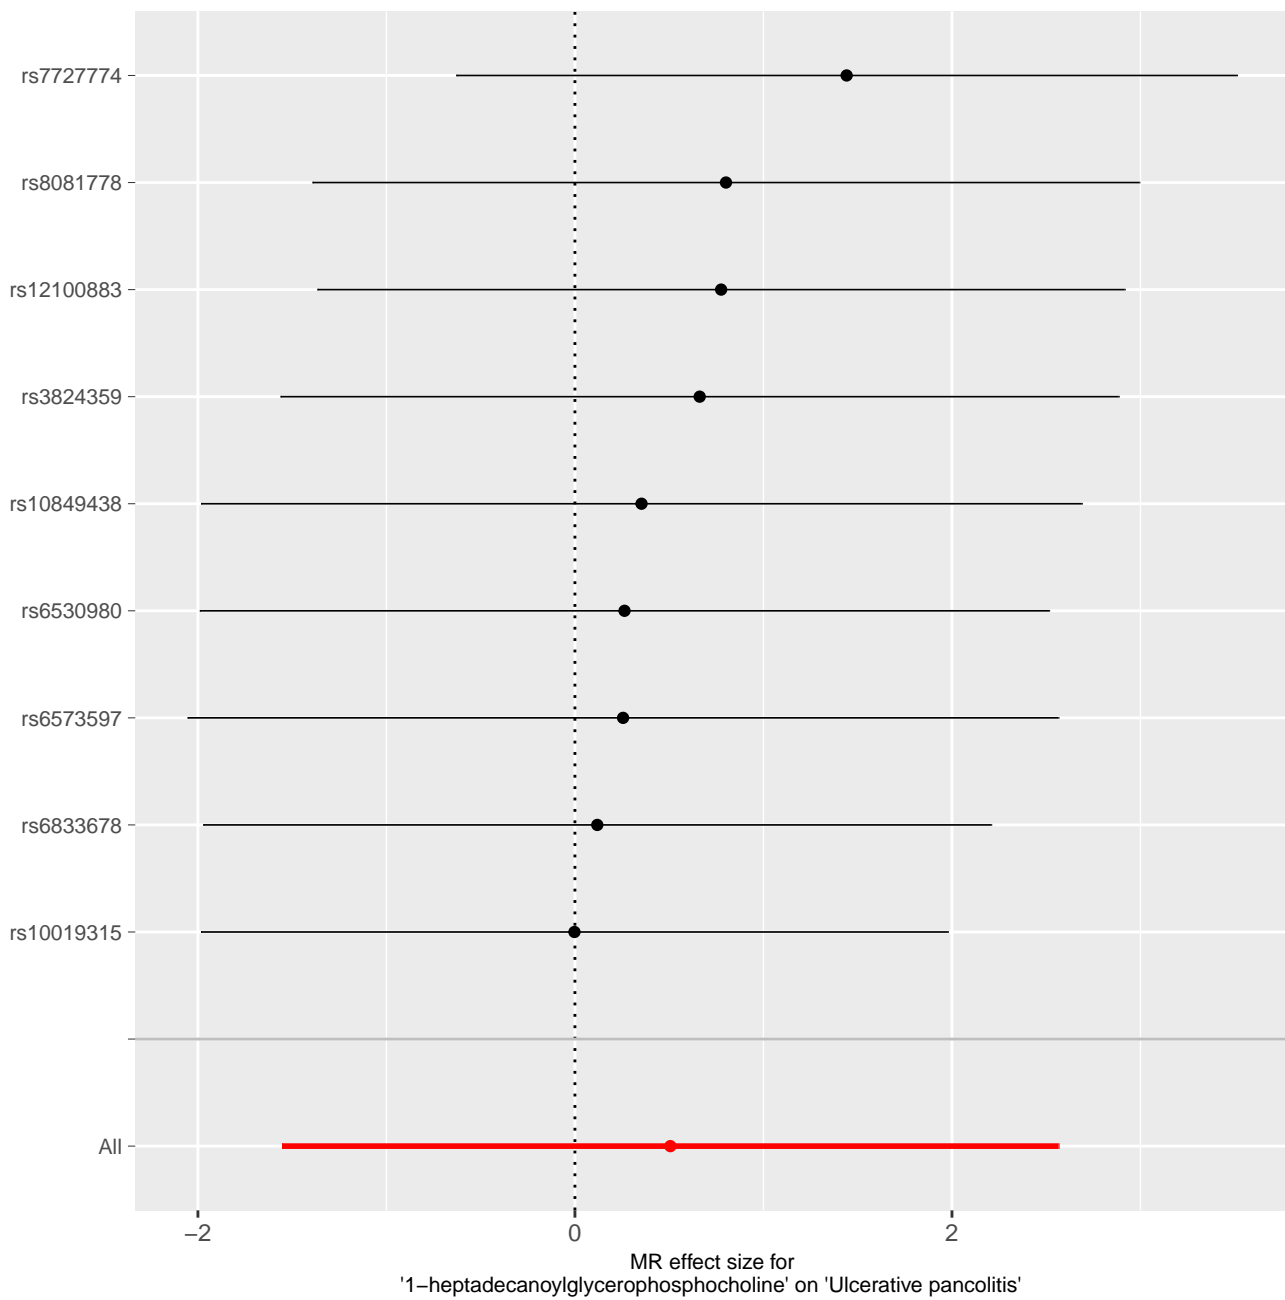

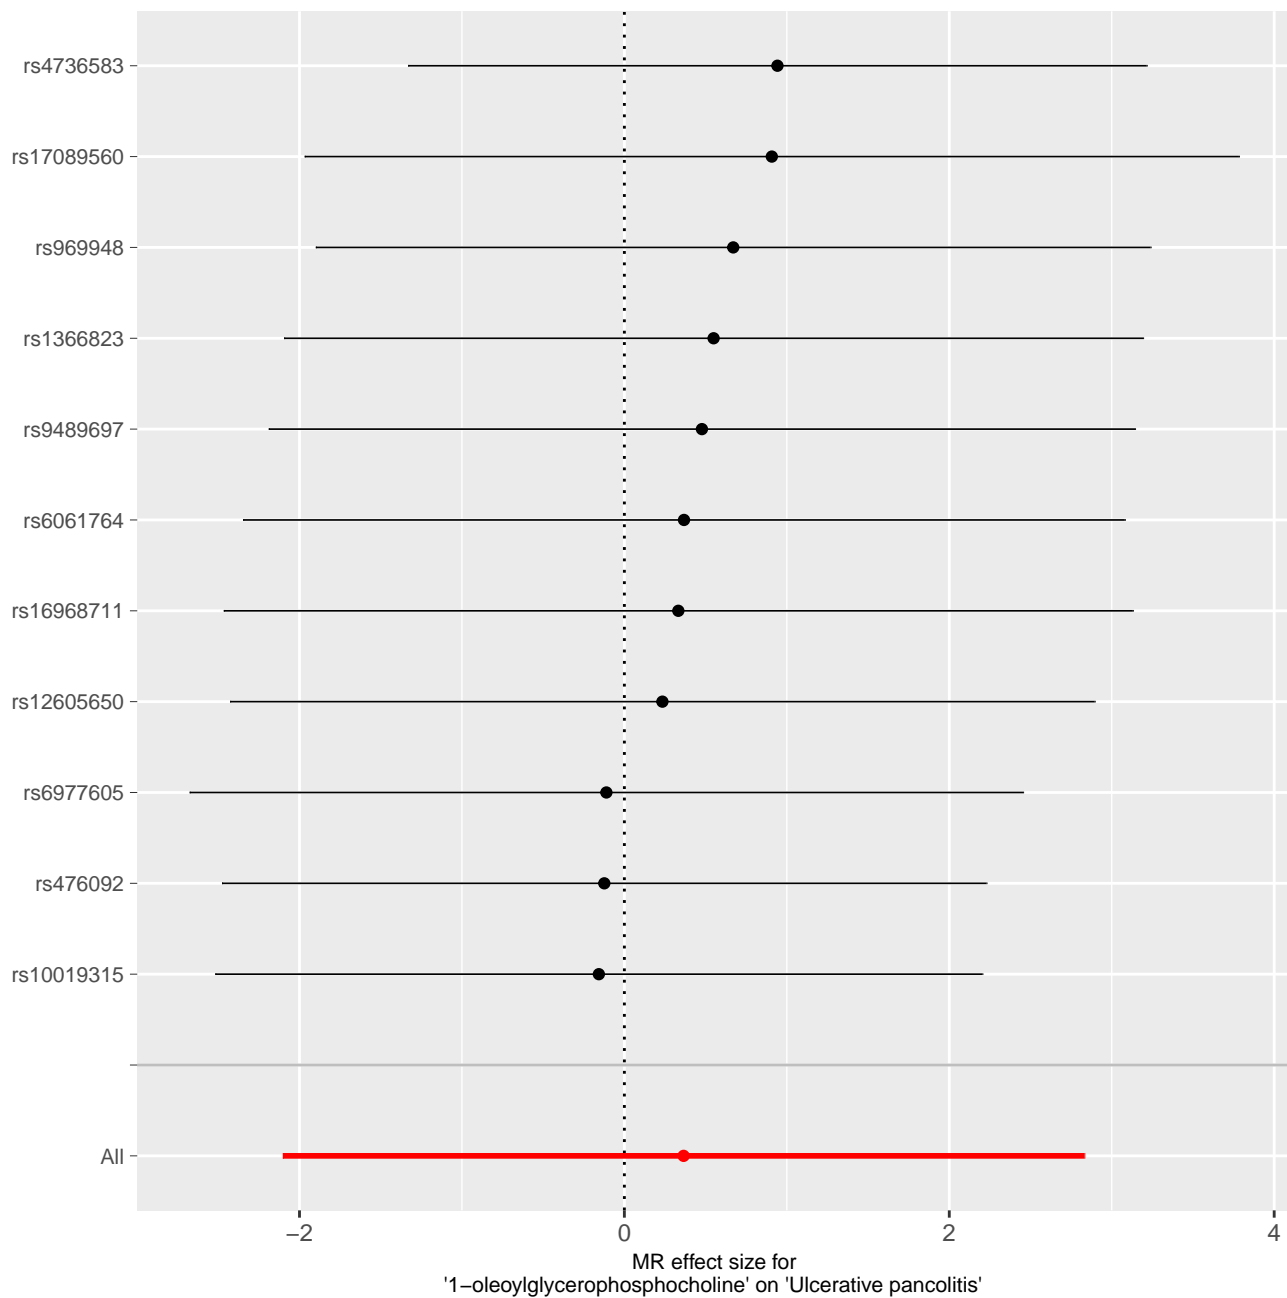

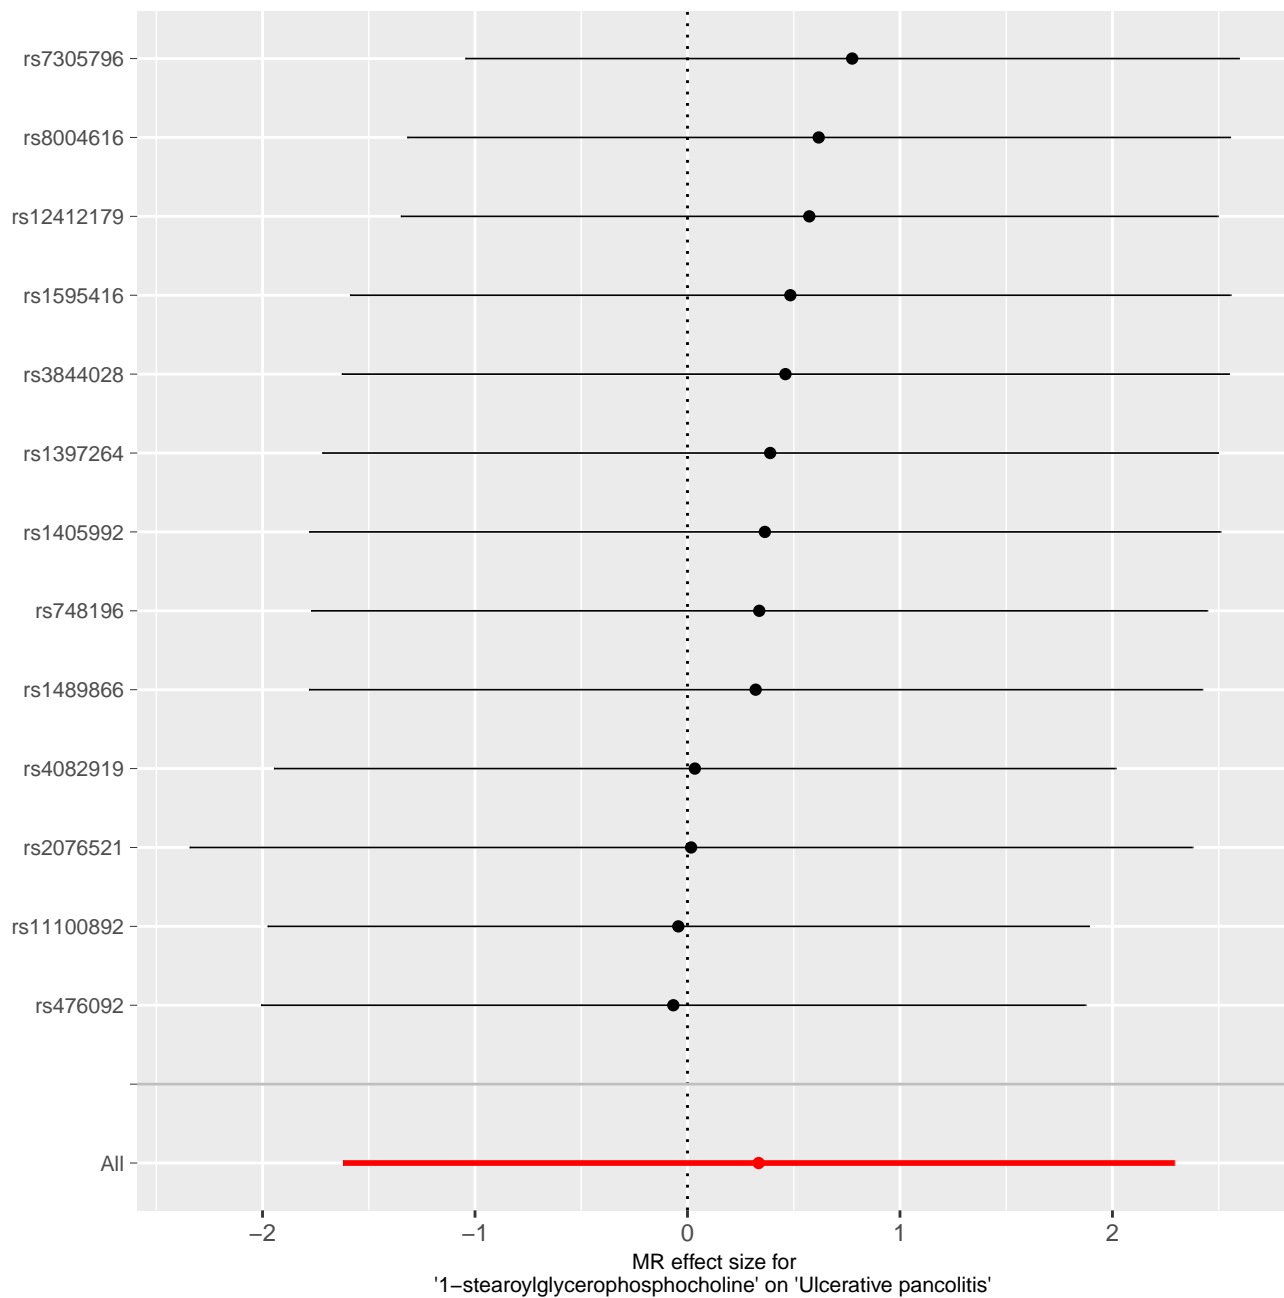

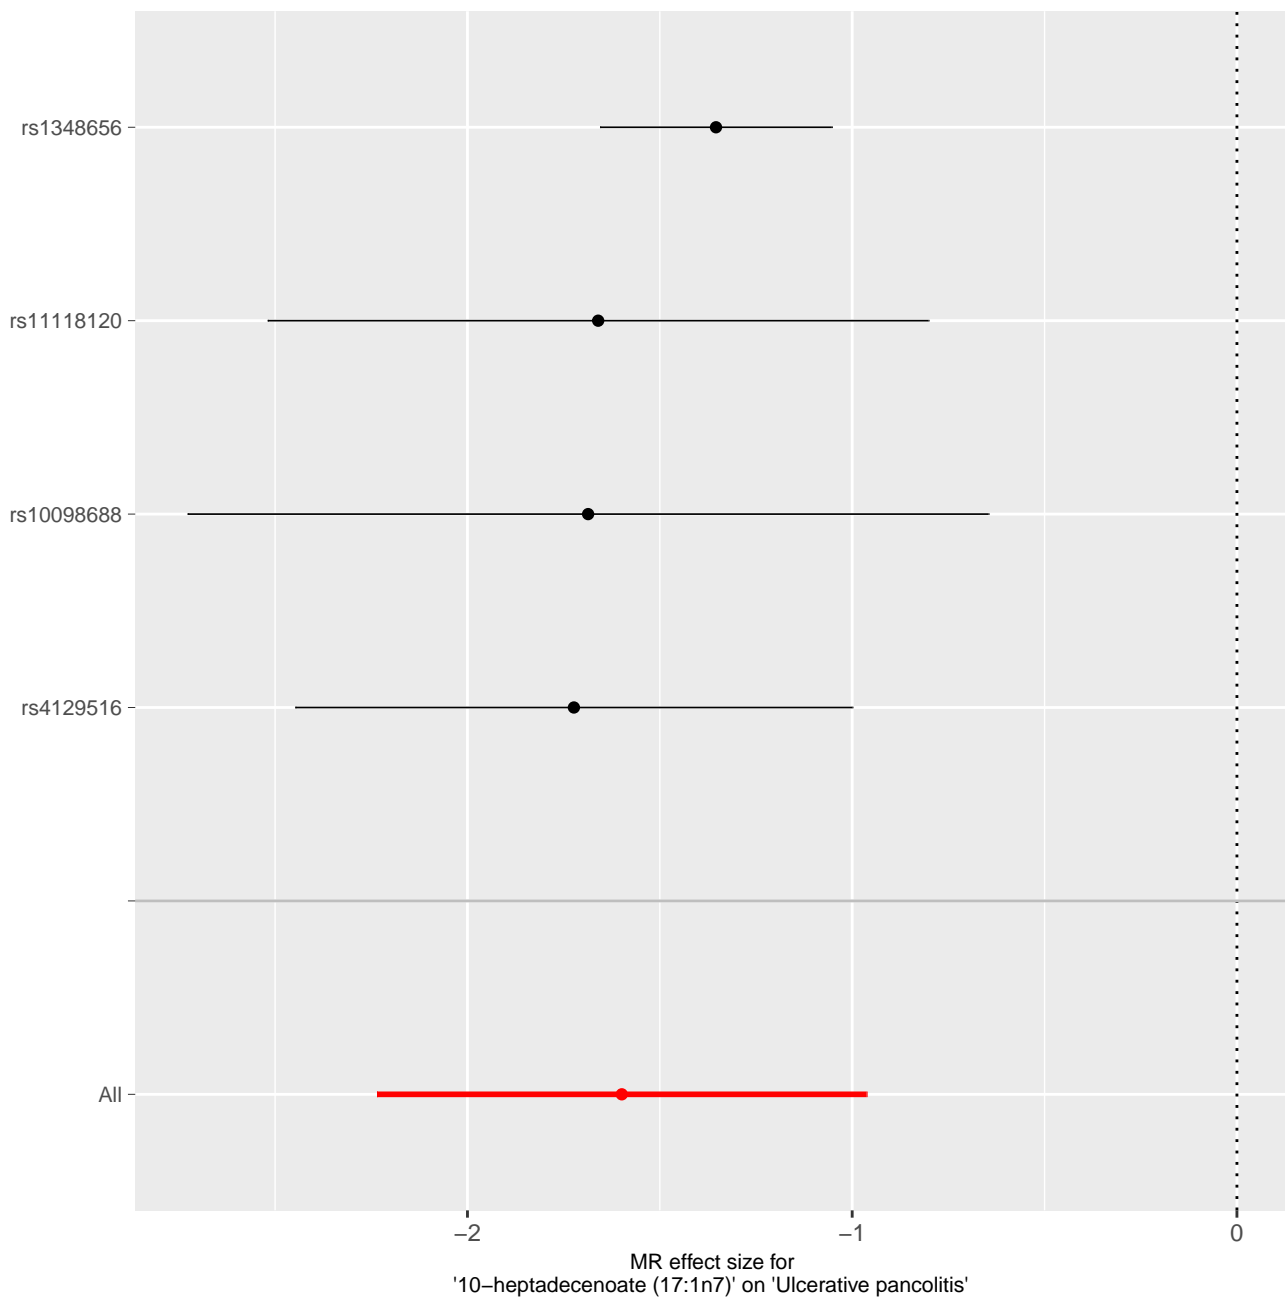

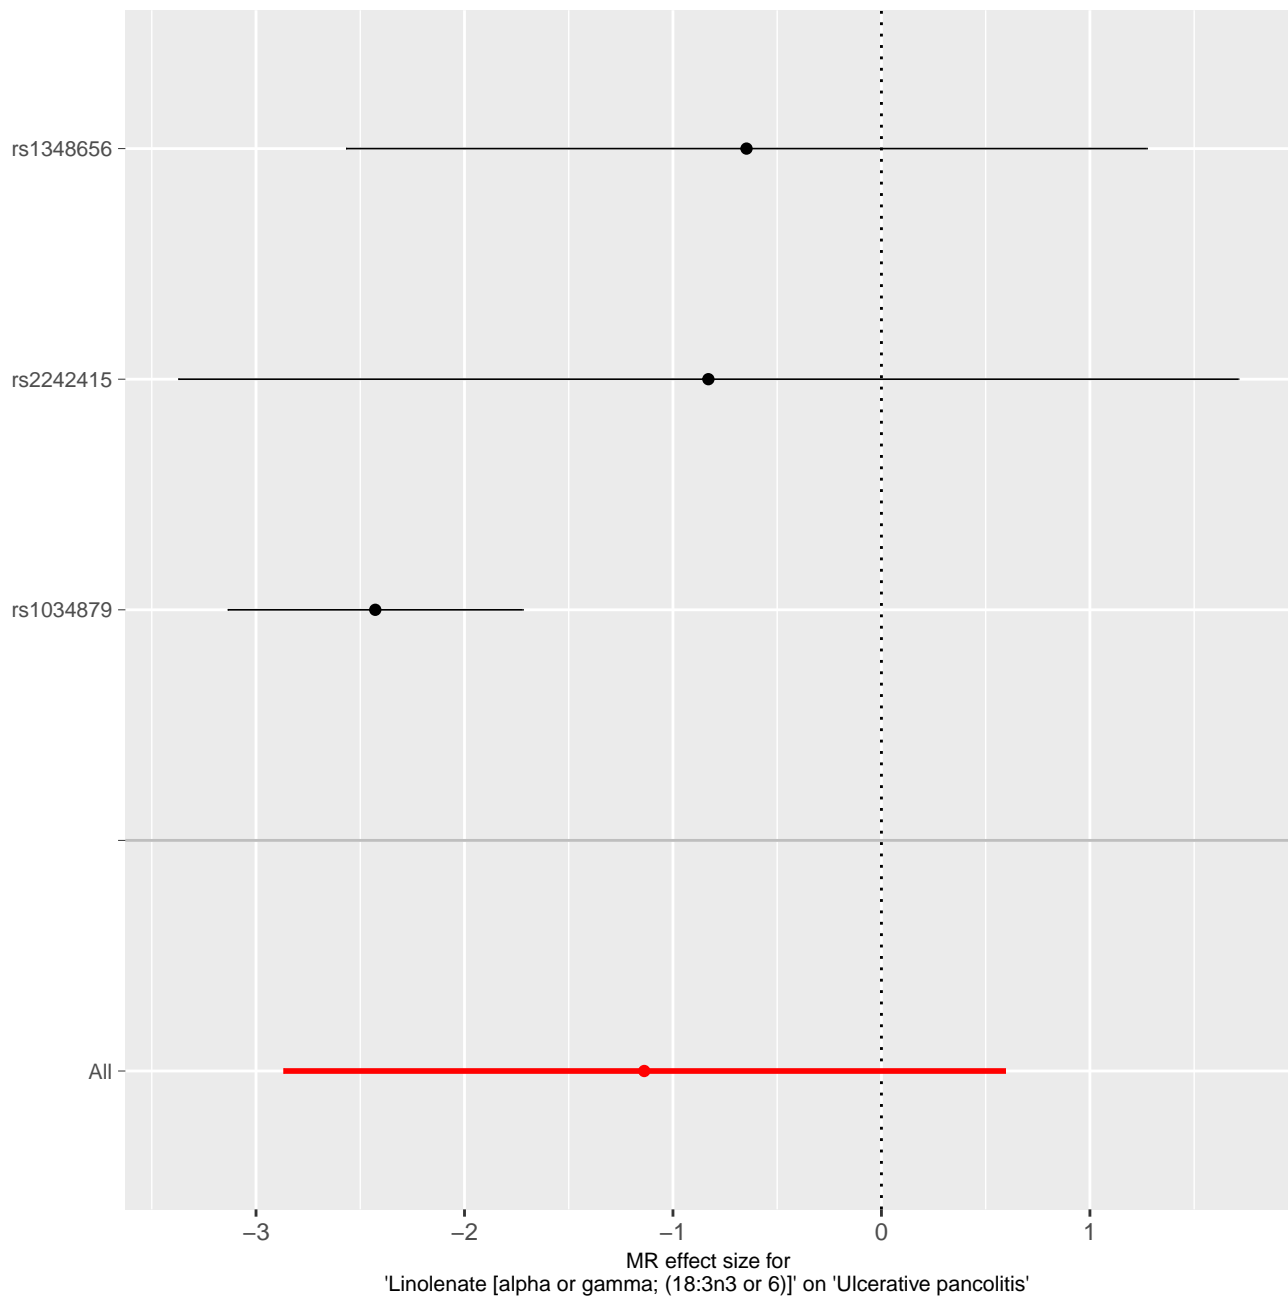

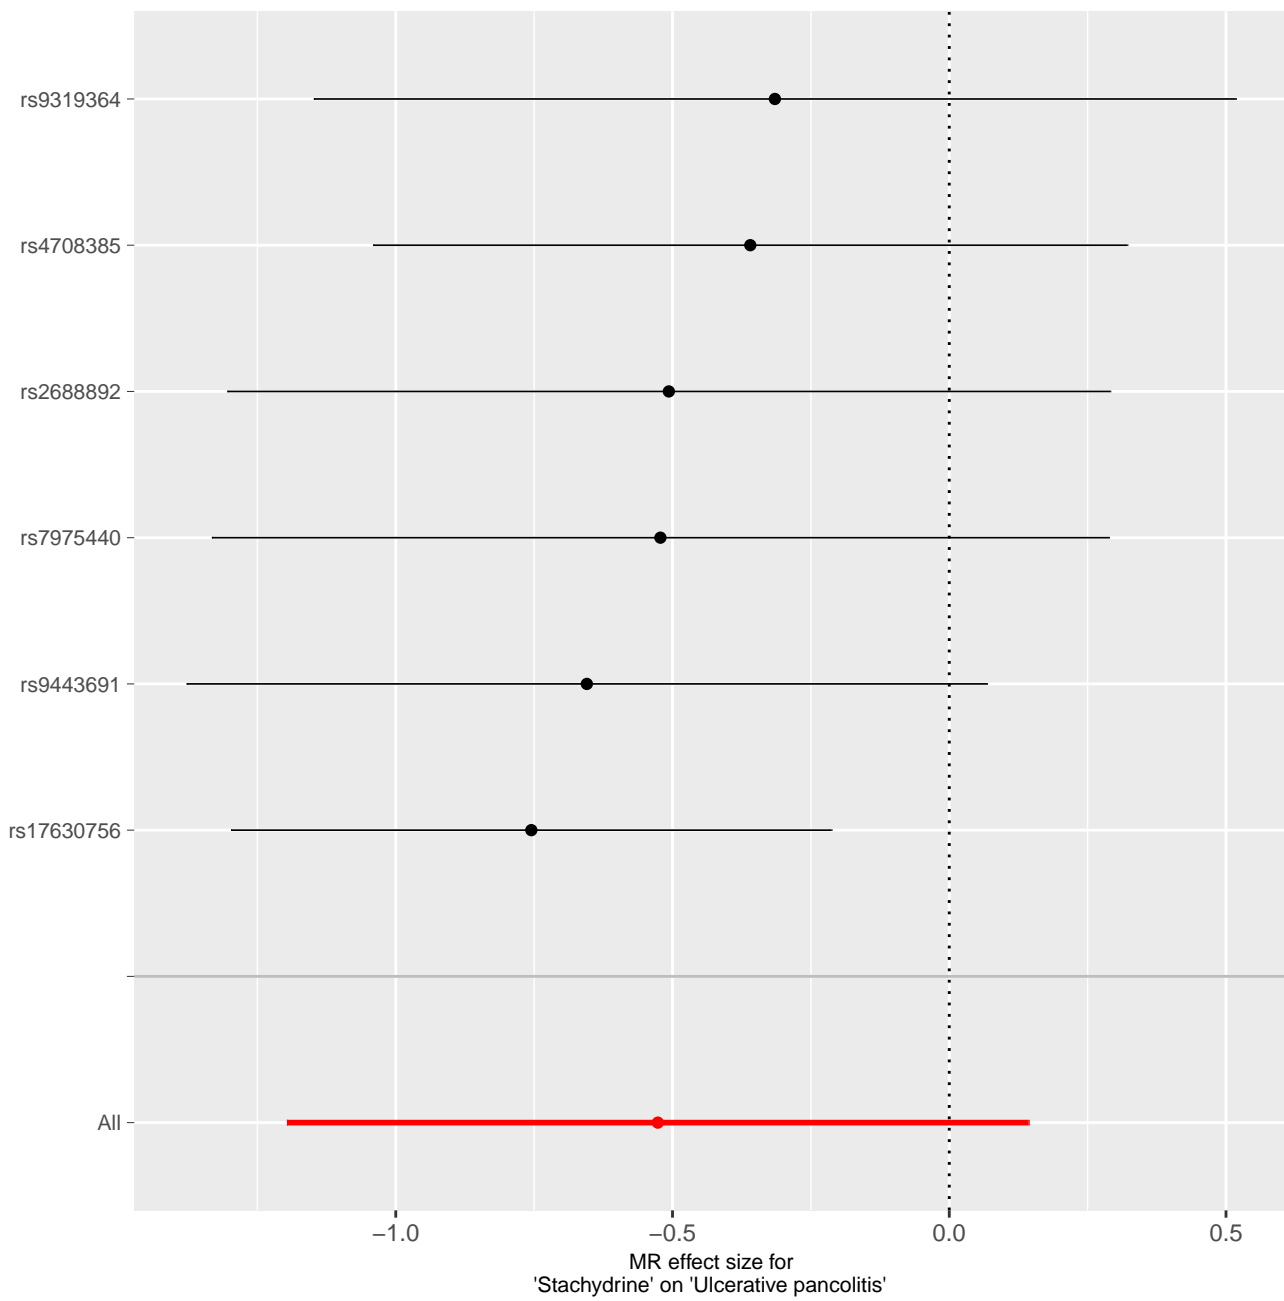

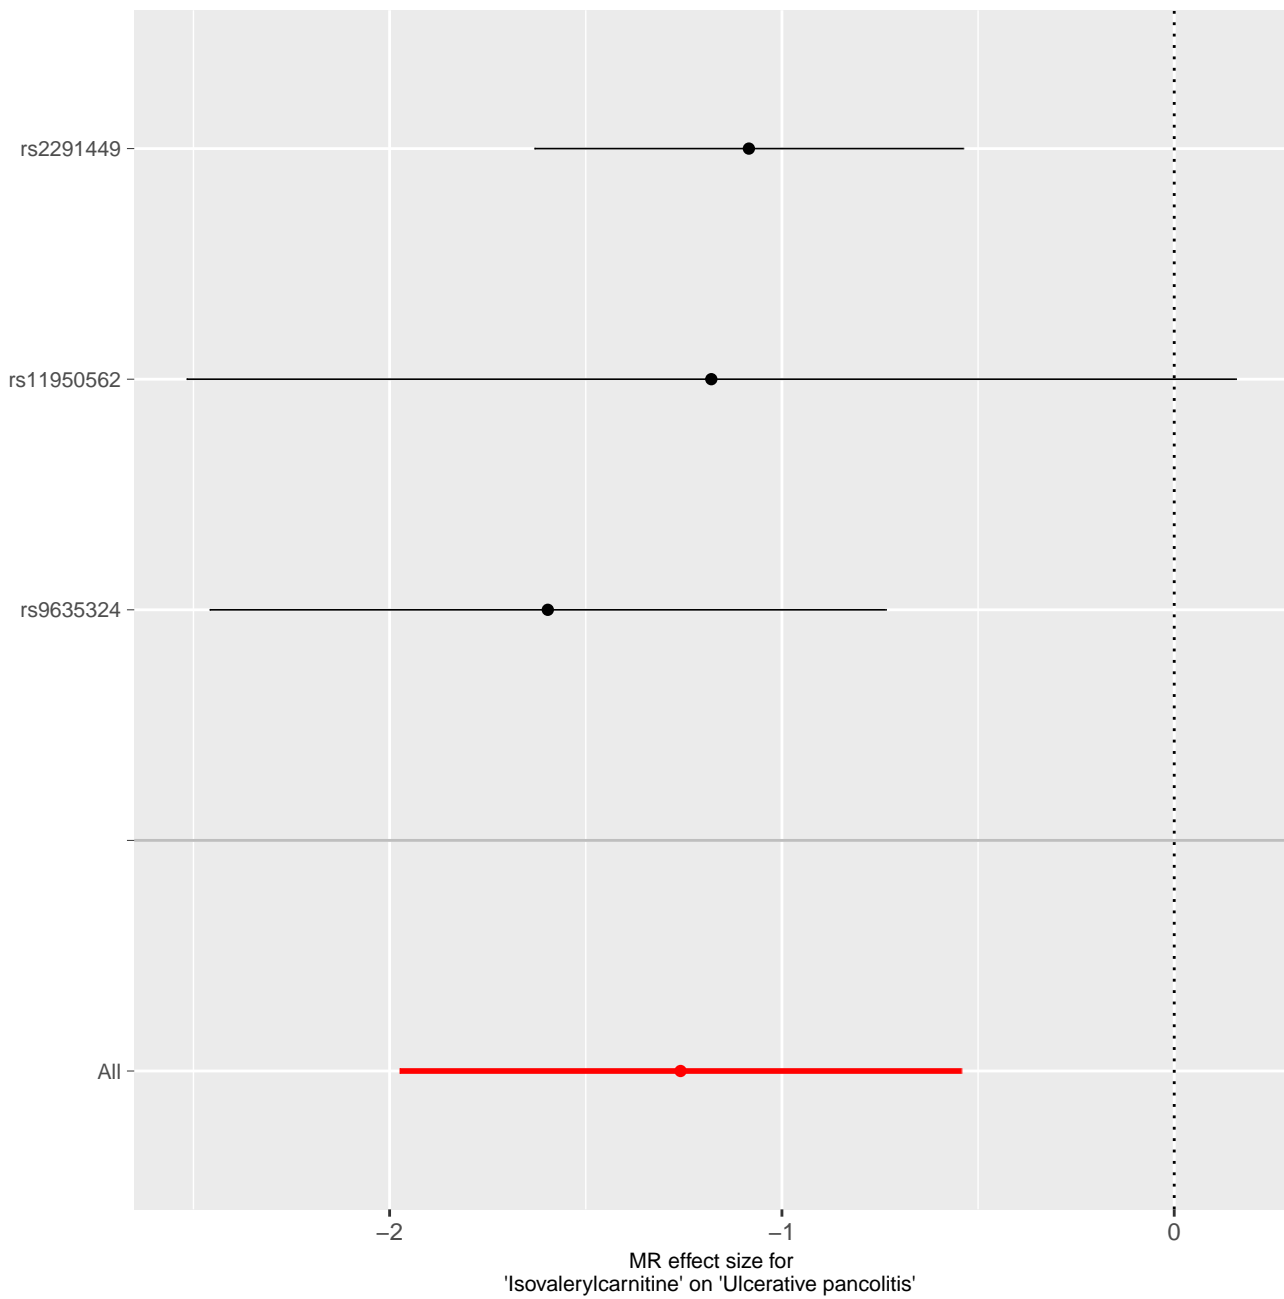

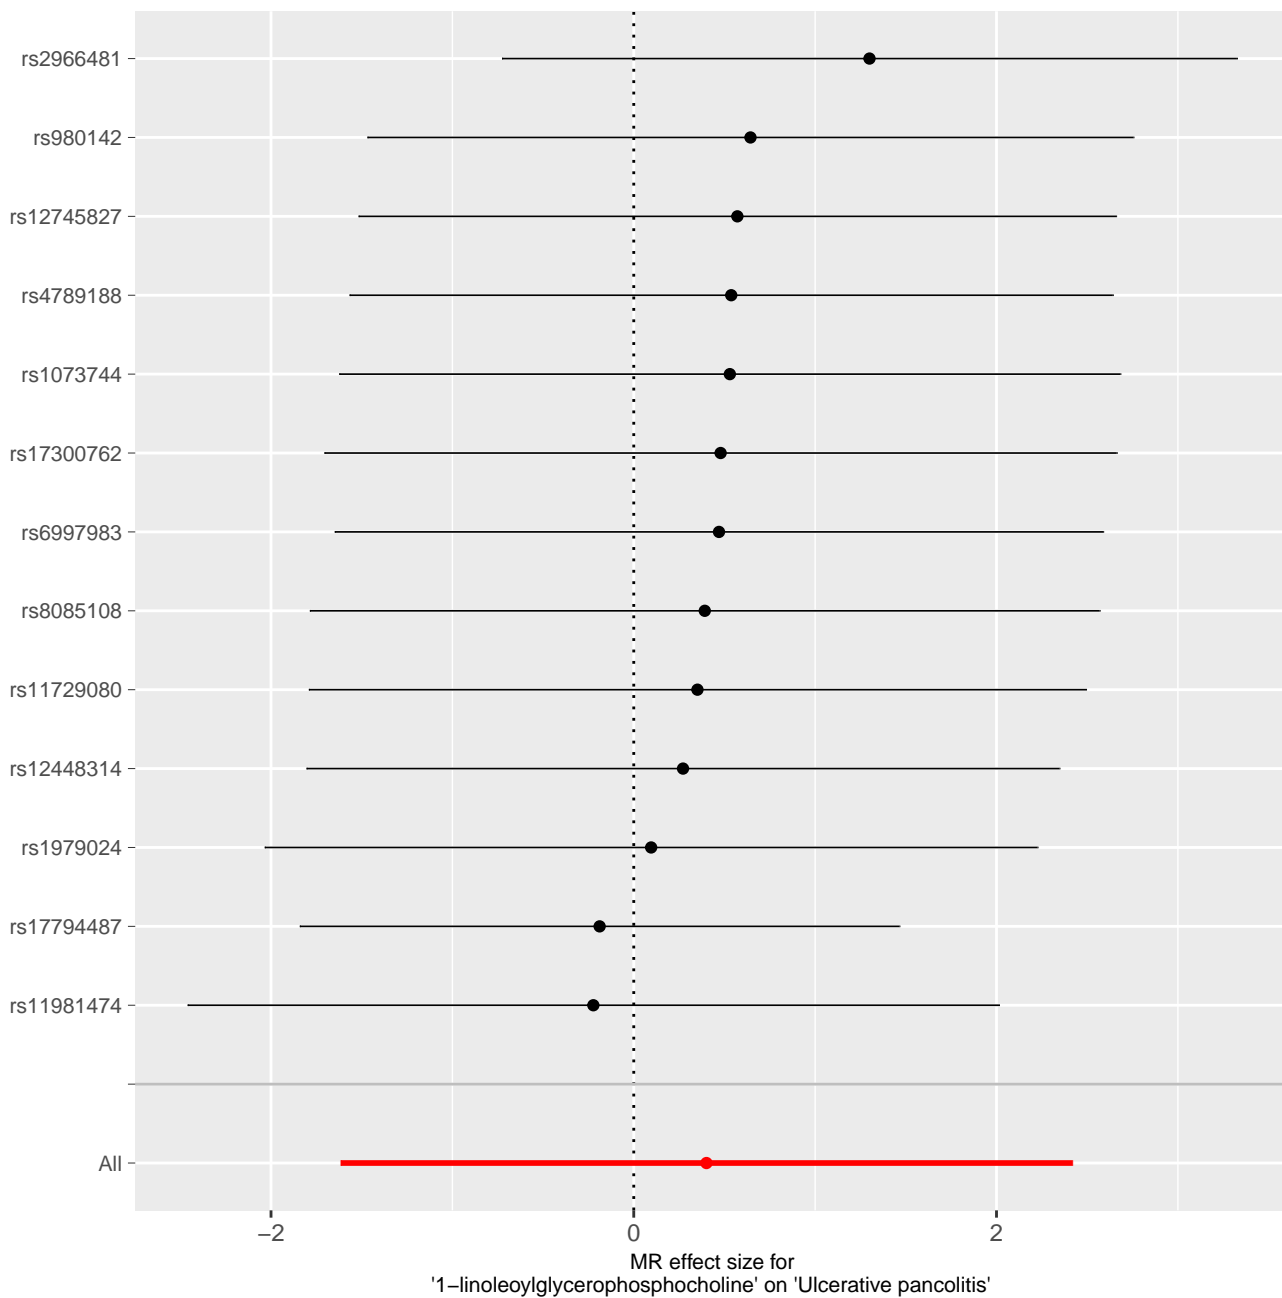



rs5030062

rs4253311

rs2731672

All

-1.0

-0.5

0.0

0.5

1.0

MR effect size for  
'Bradykinin, des-arg(9)' on 'Ulcerative pancolitis'

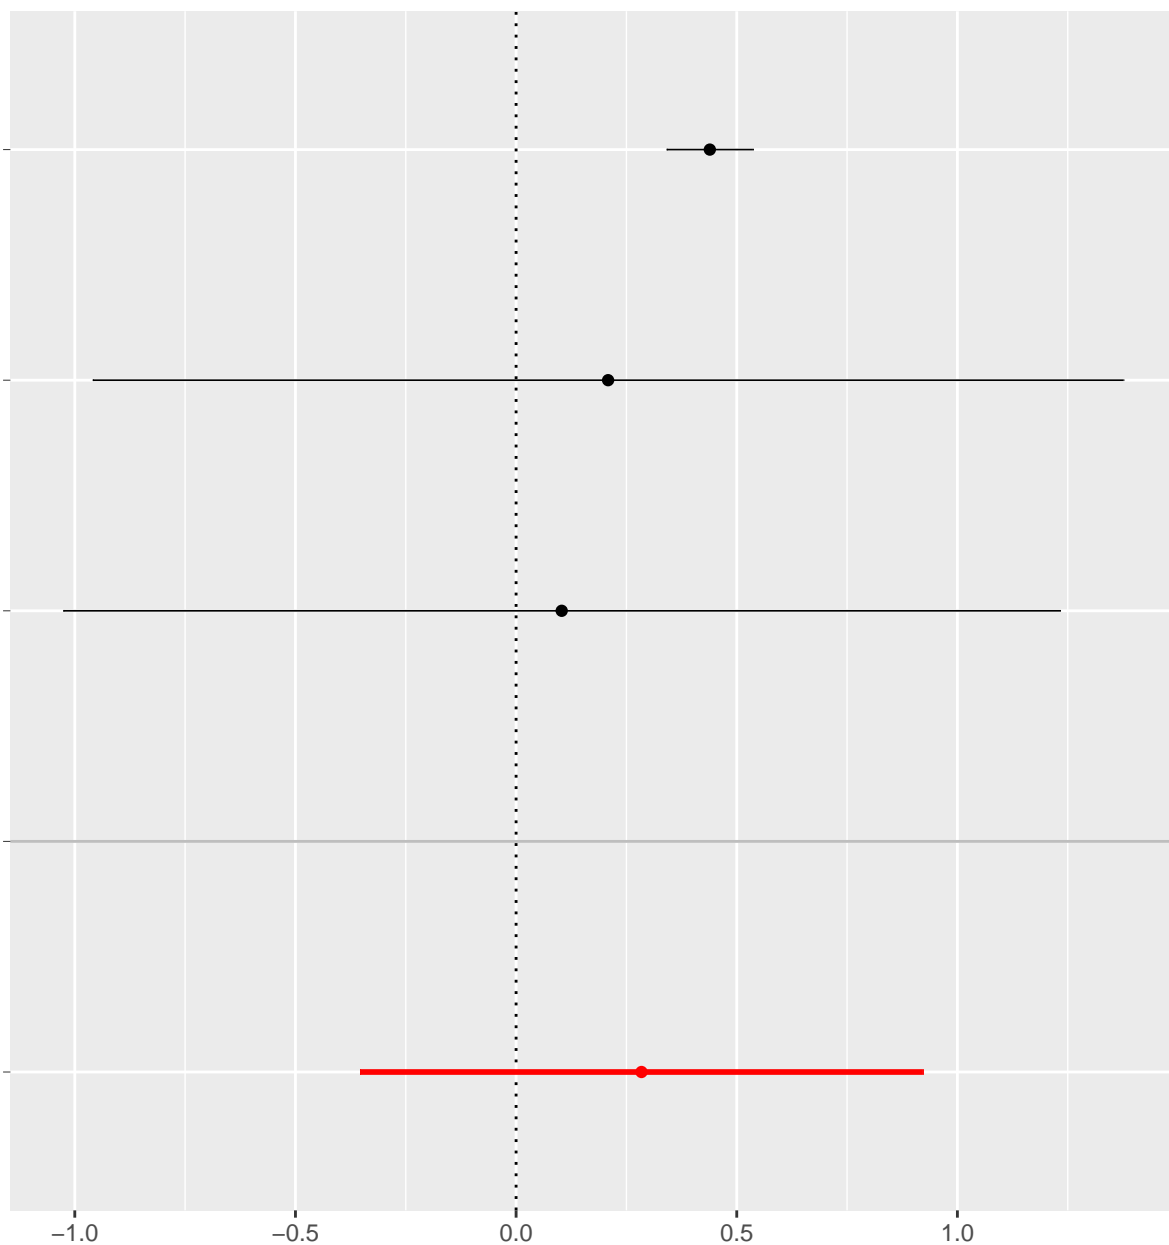

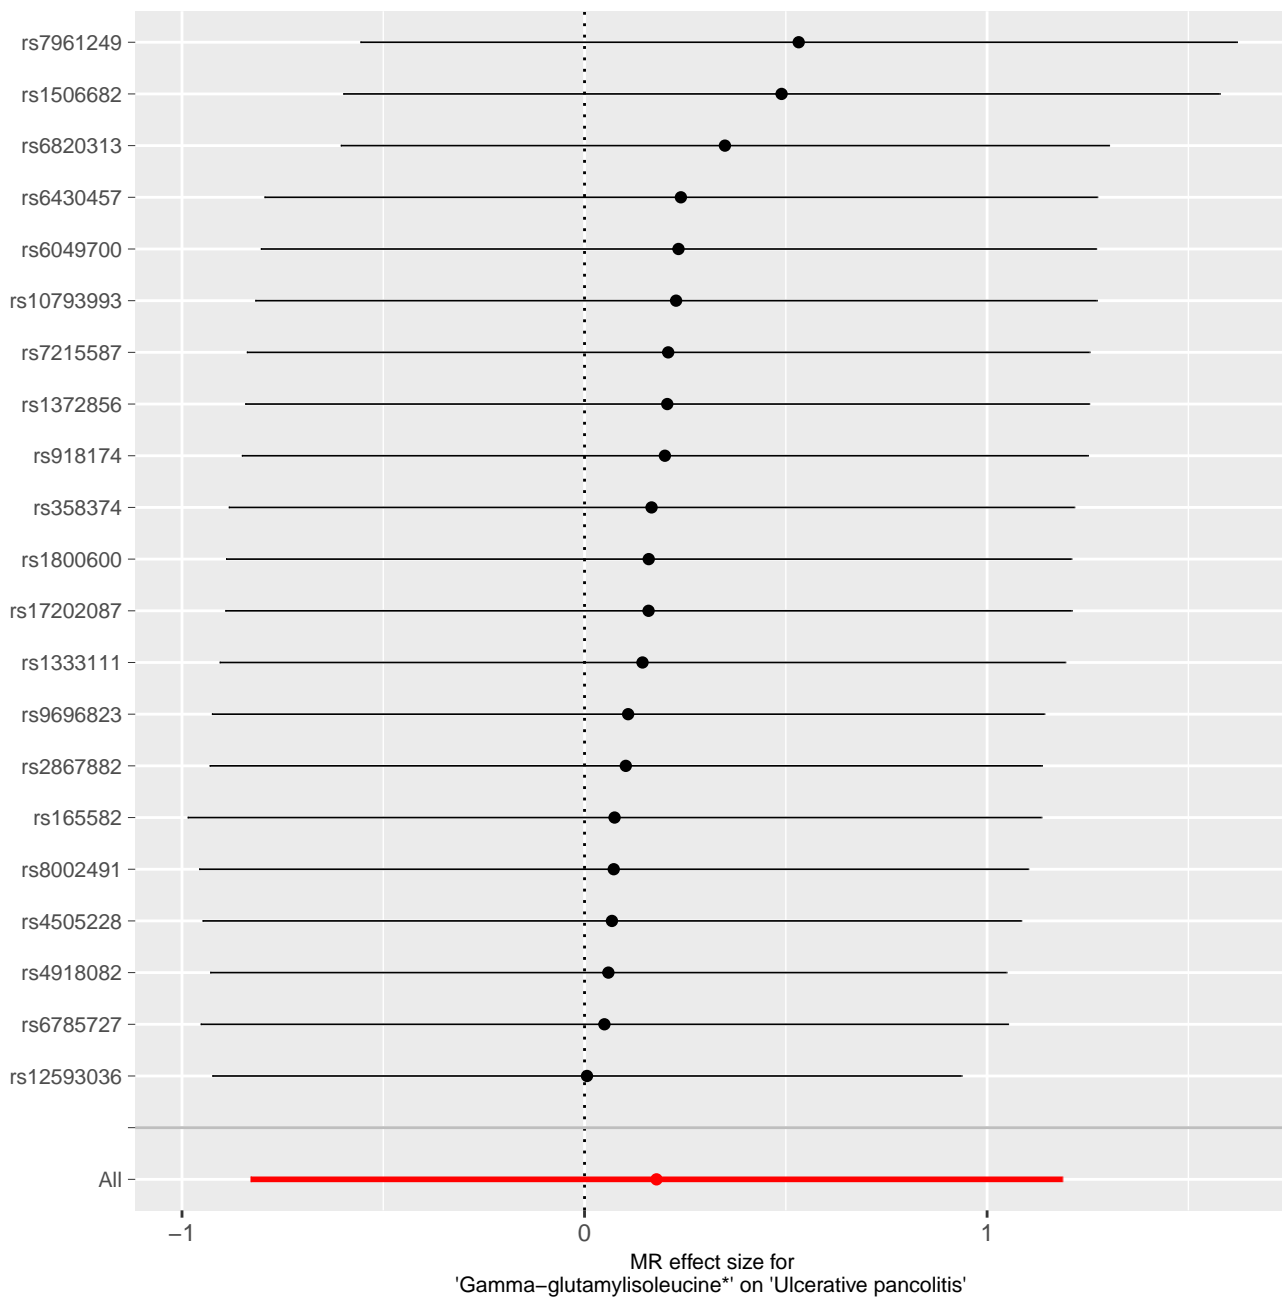

rs4680092

rs4861137

rs6907935

rs1456197

All

-4

-3

-2

-1

0

MR effect size for  
'Isovalerate' on 'Ulcerative pancolitis'

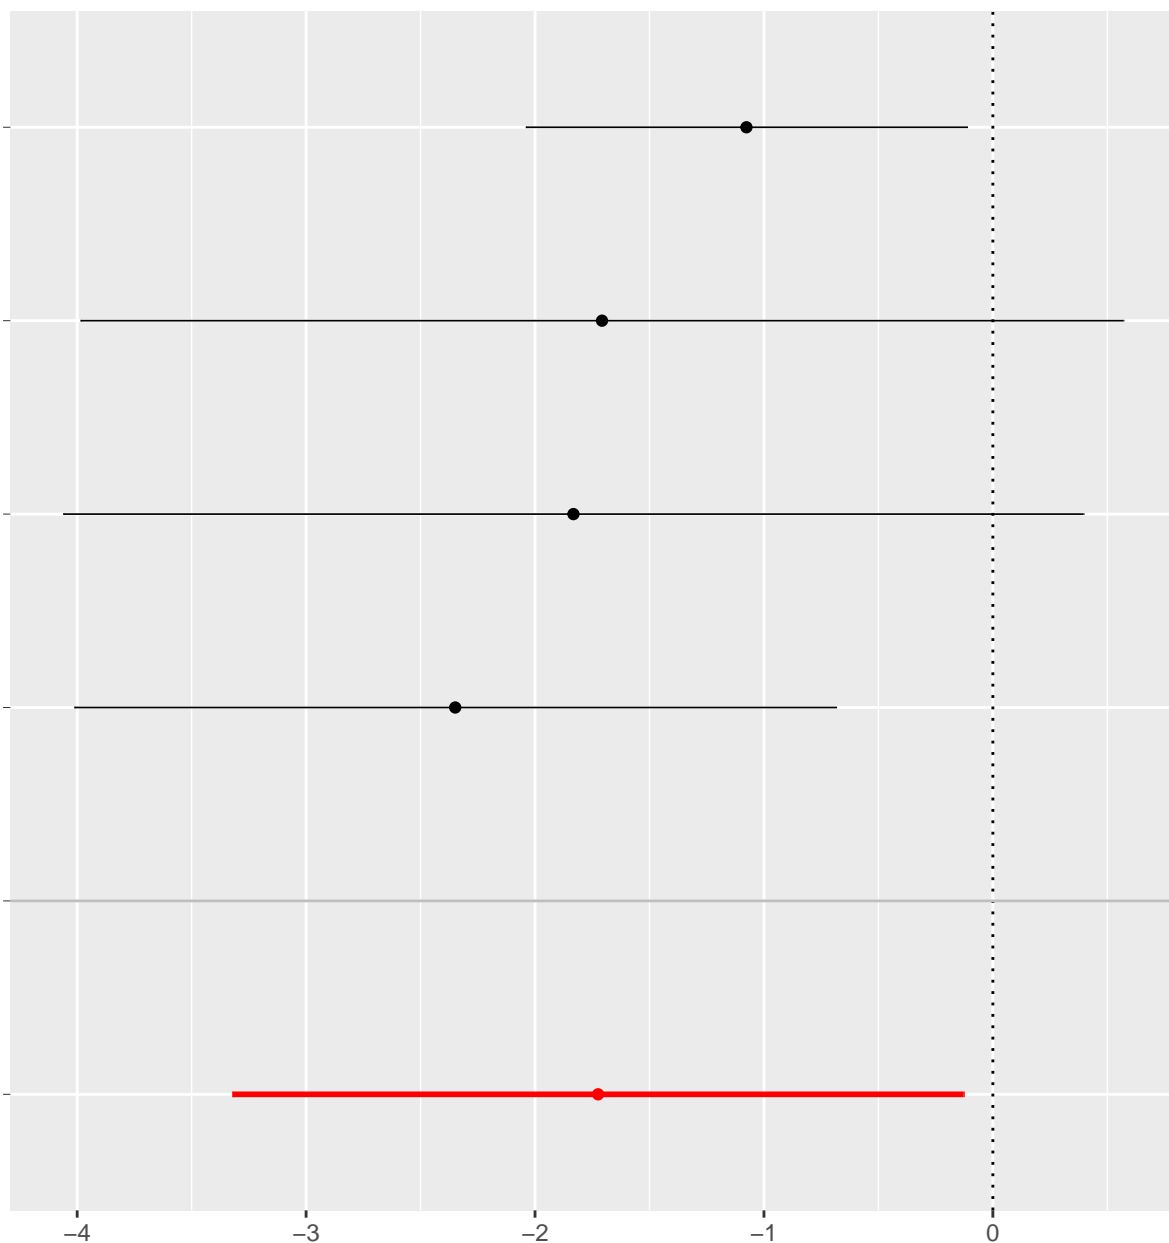

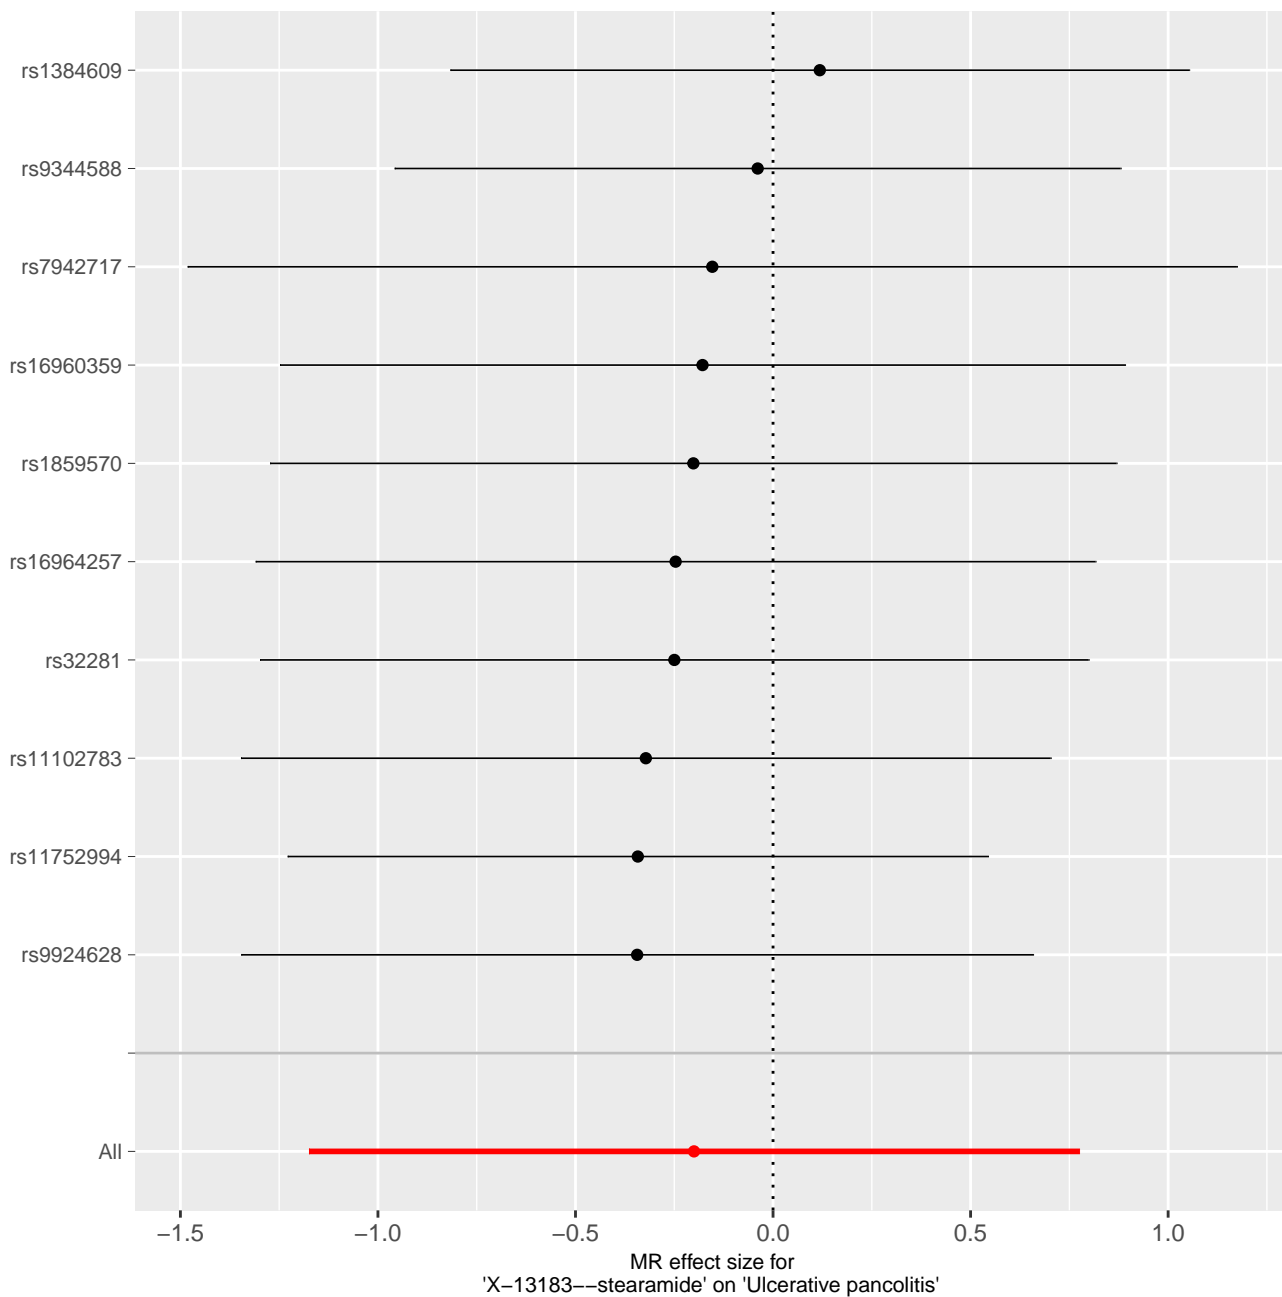

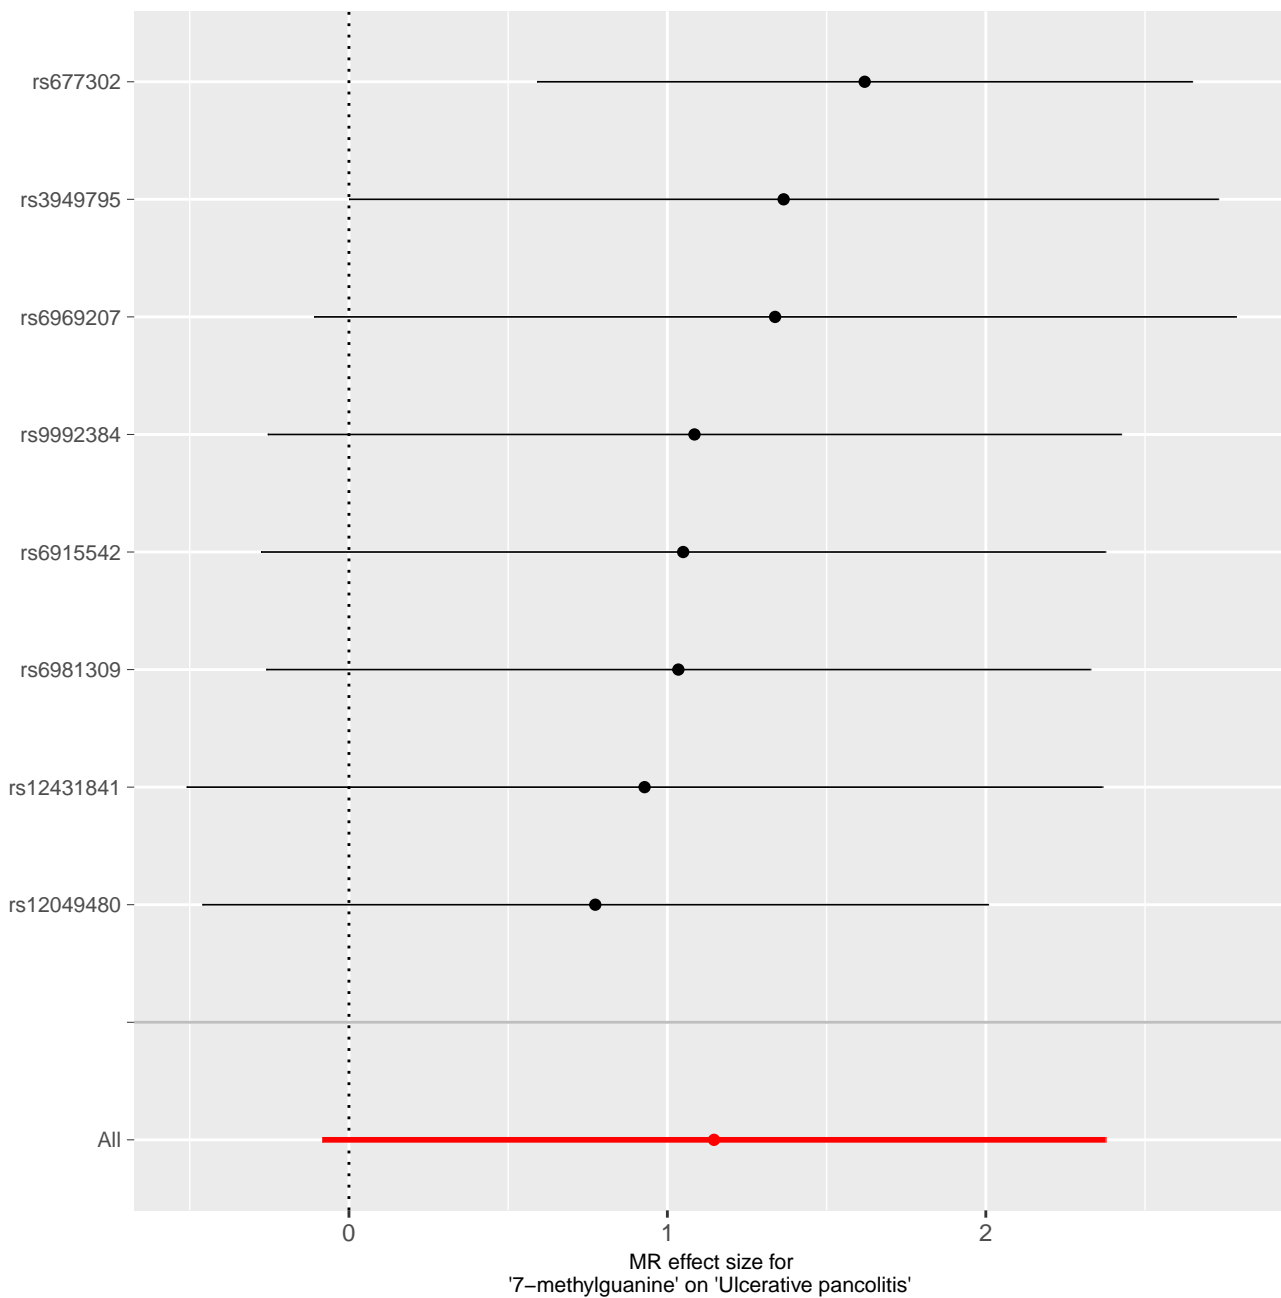

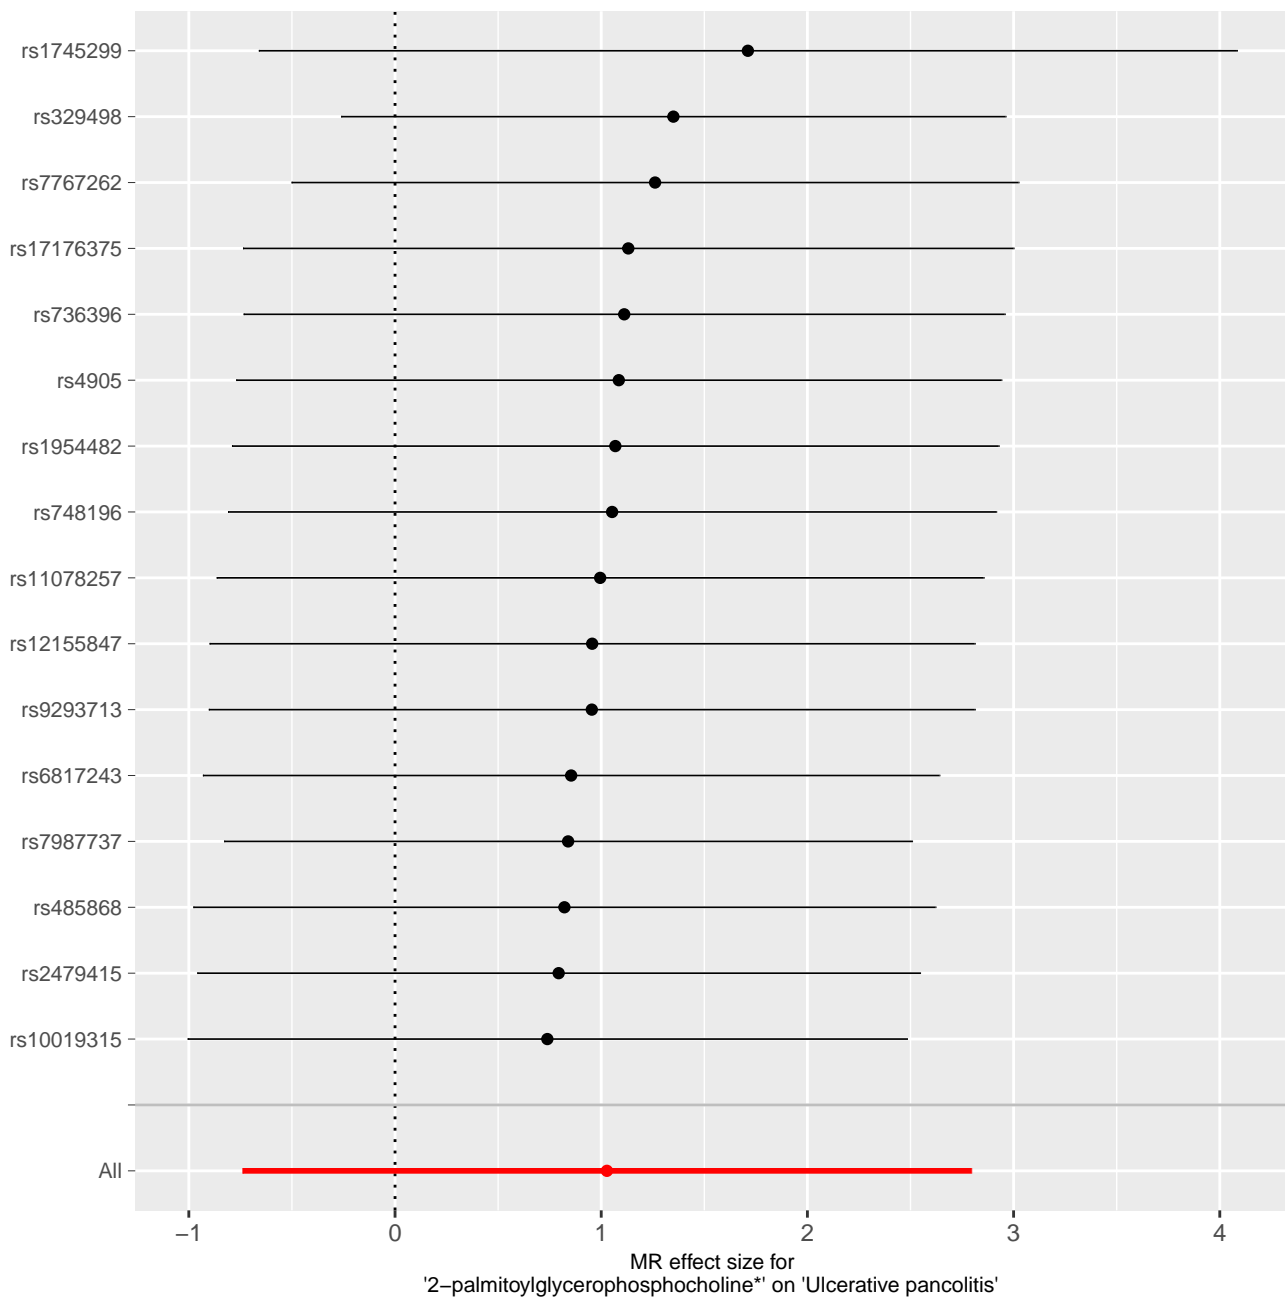

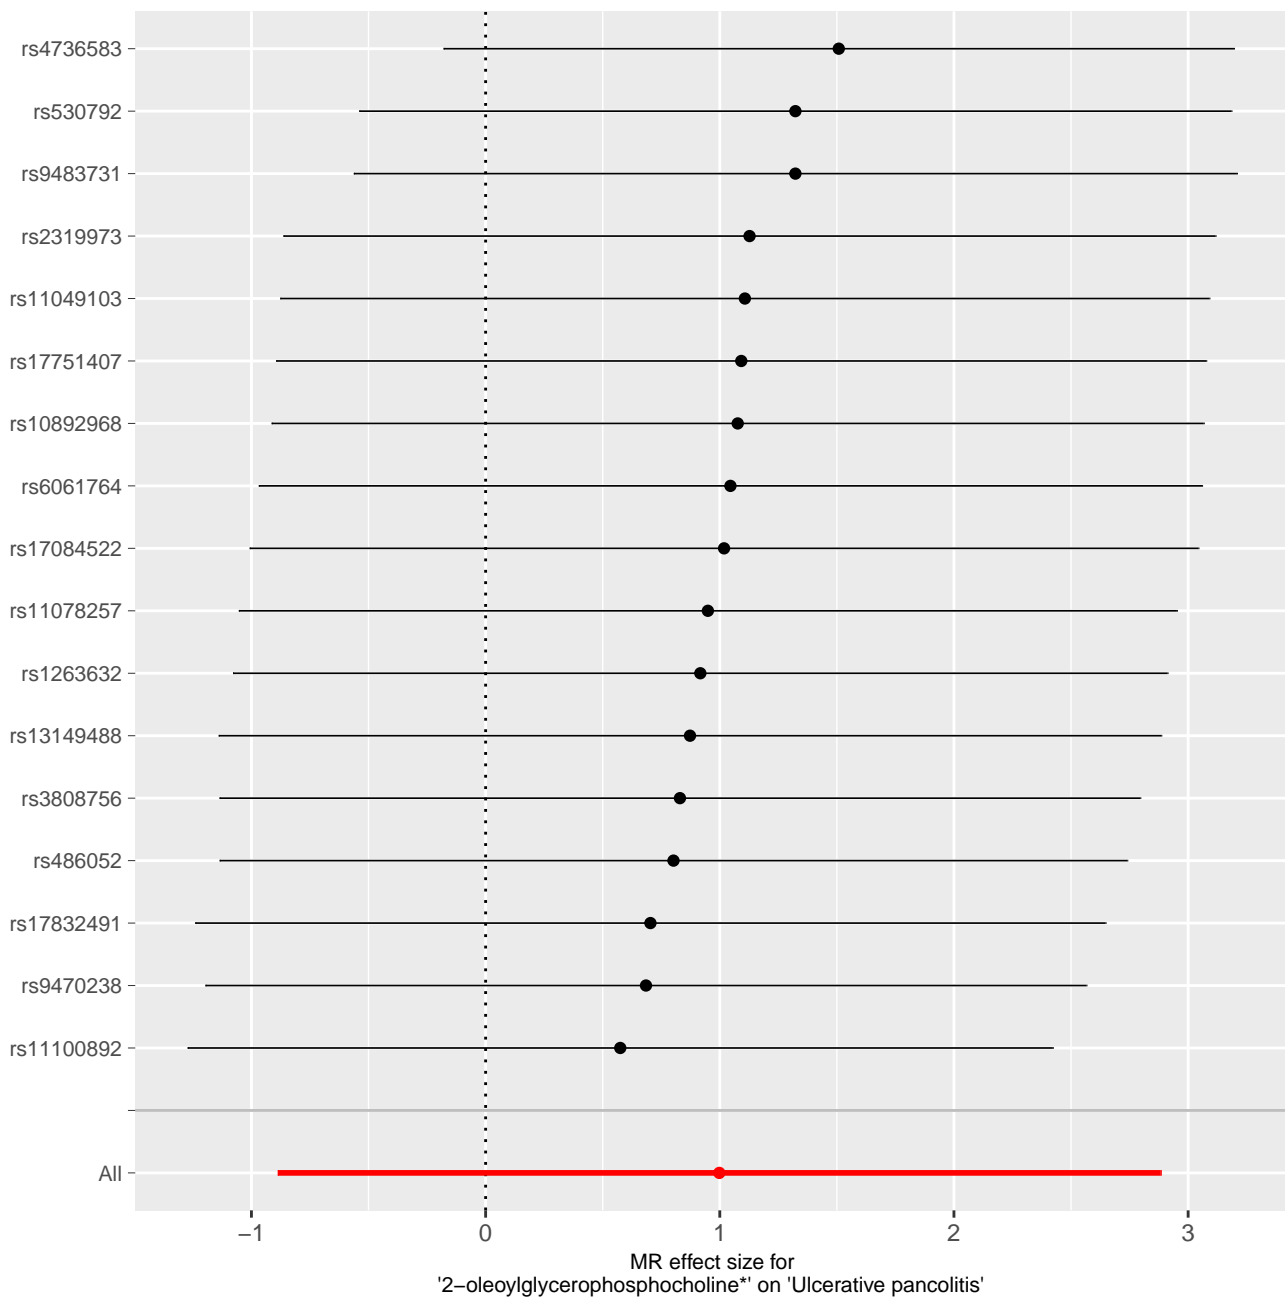

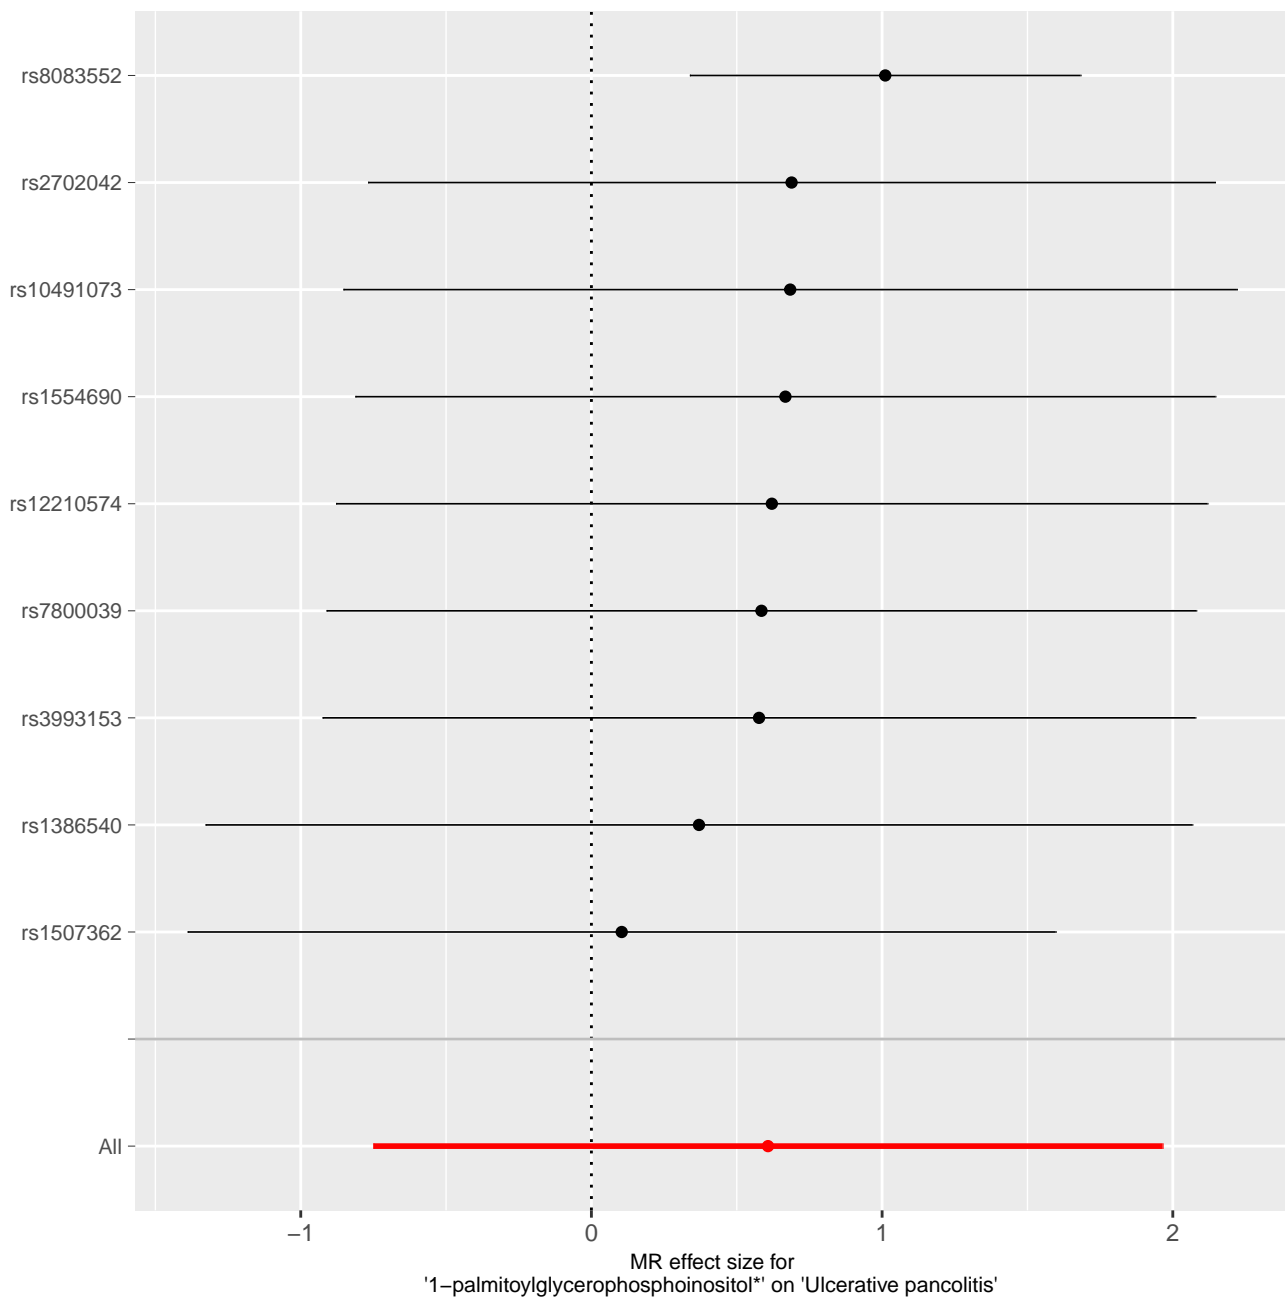



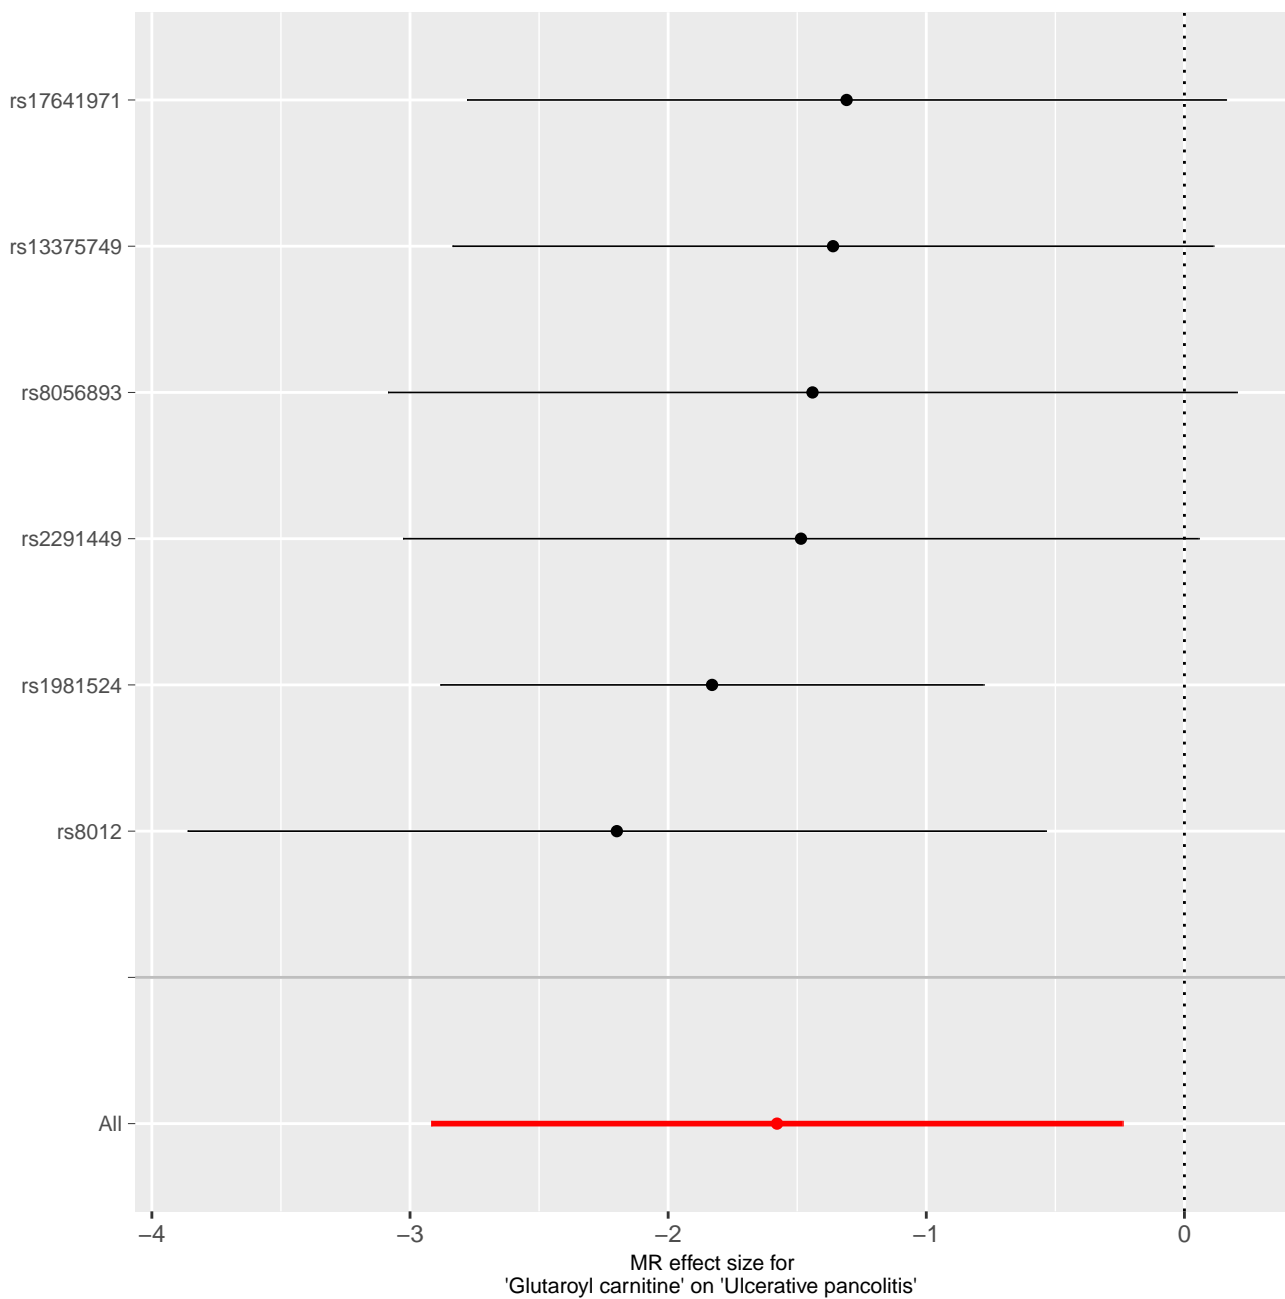

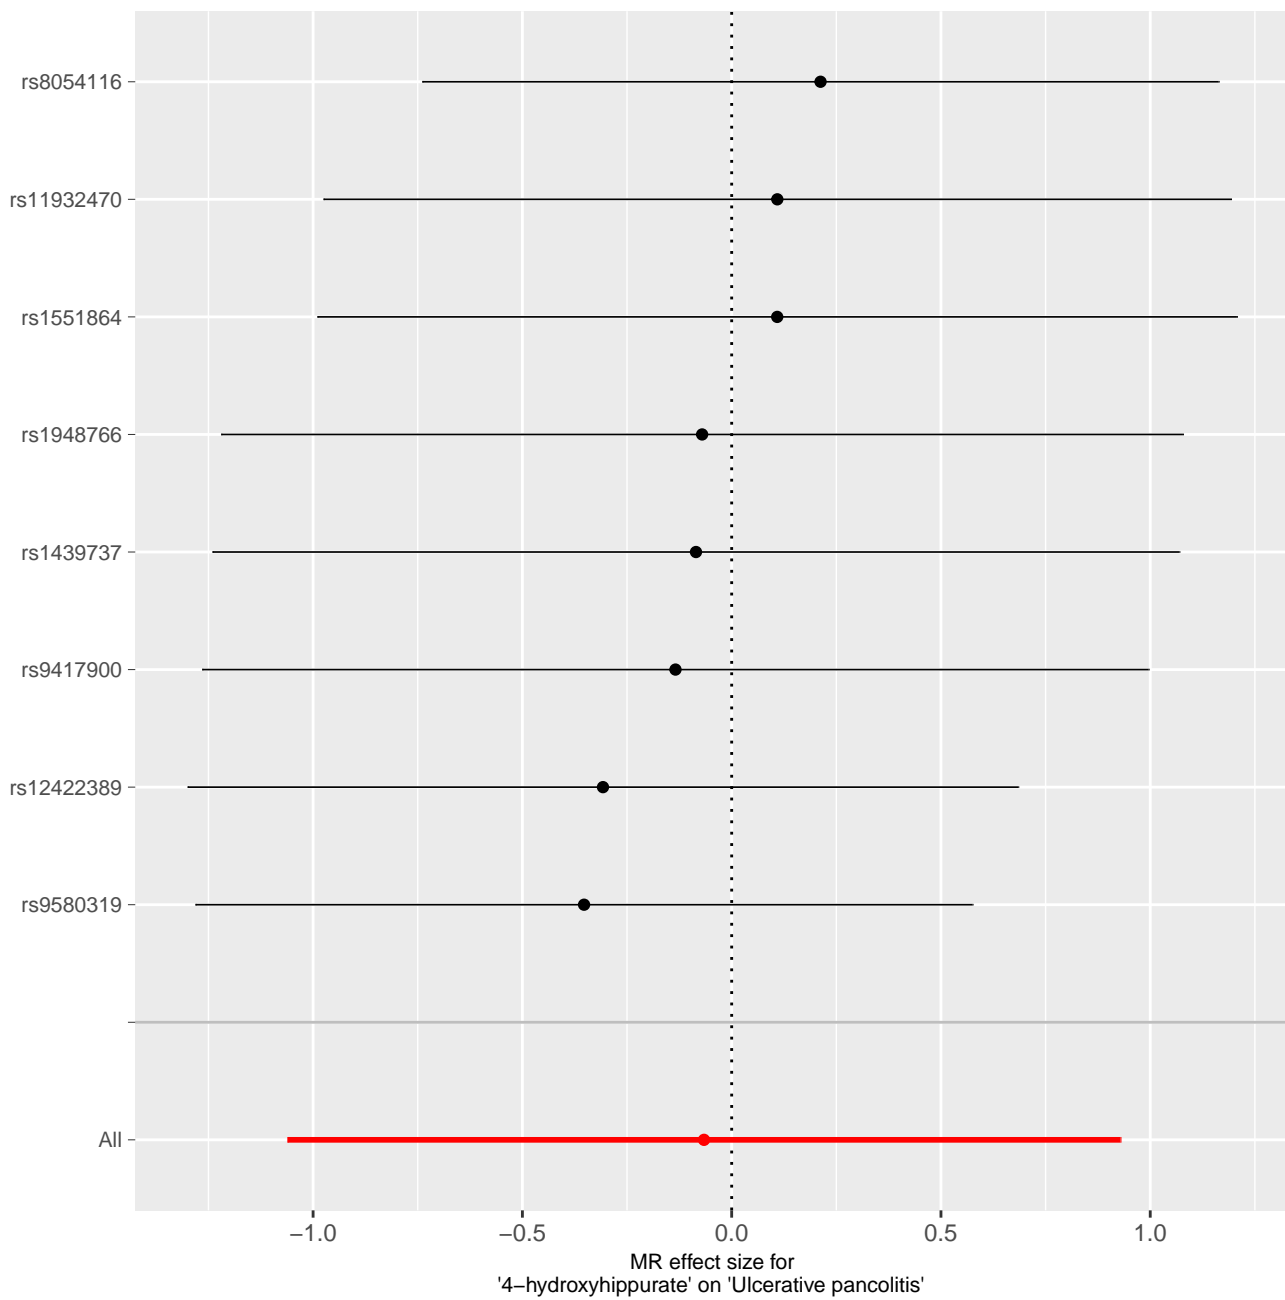

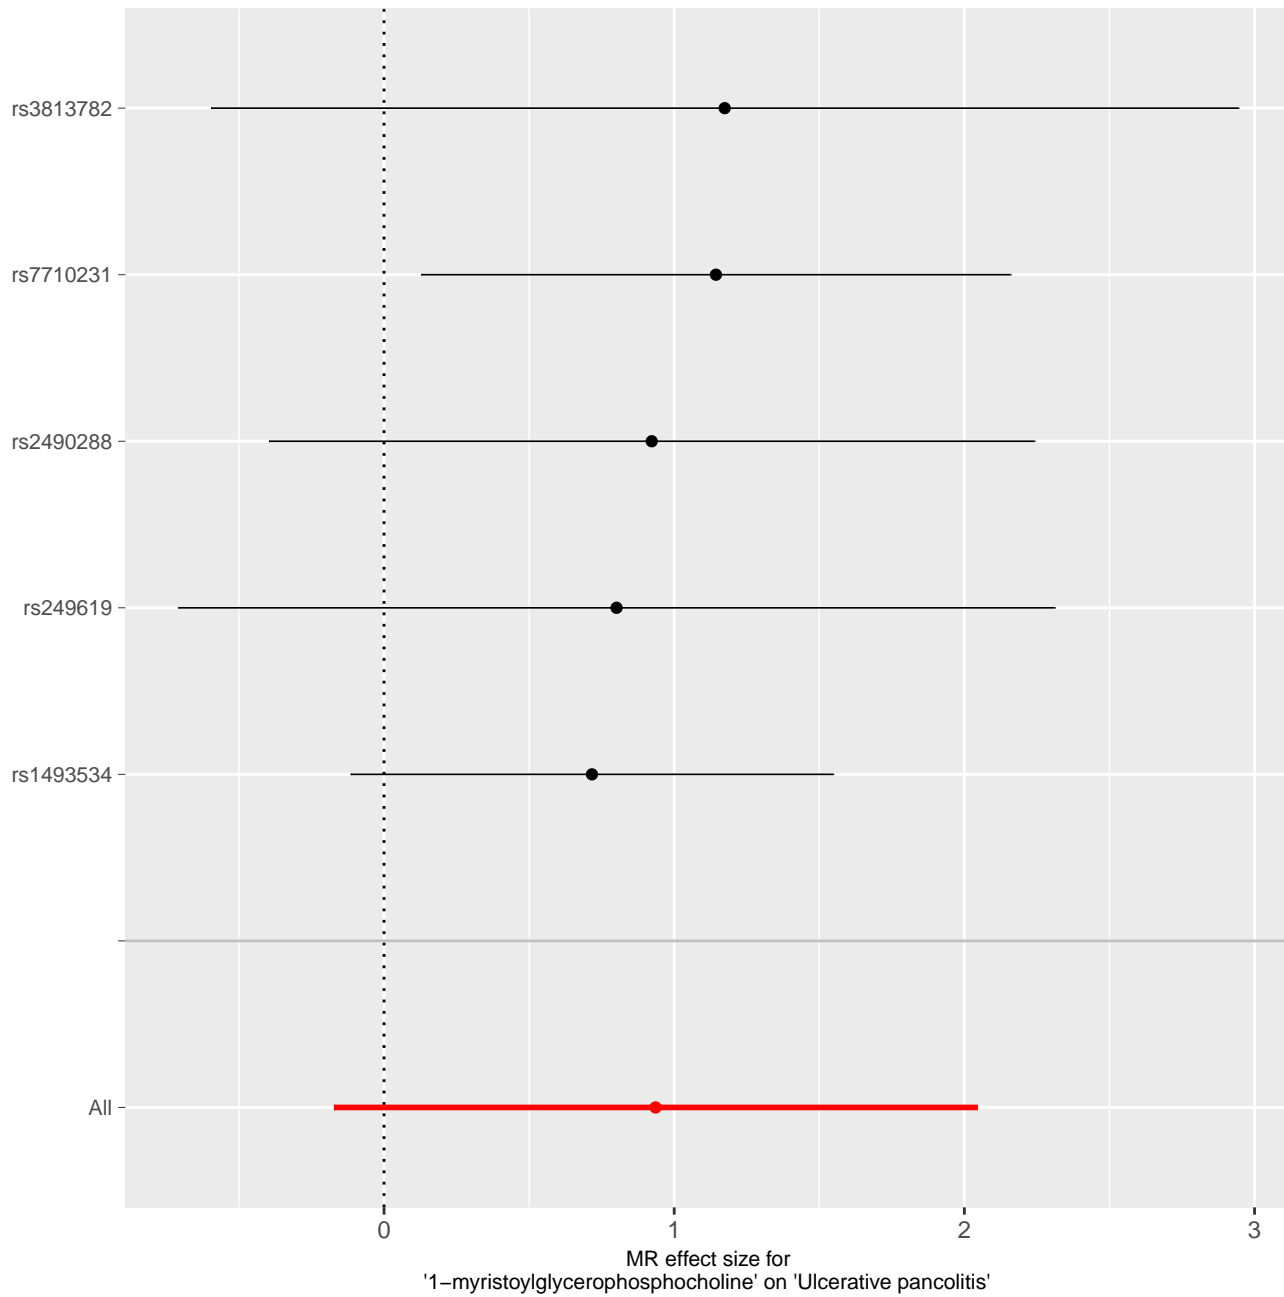

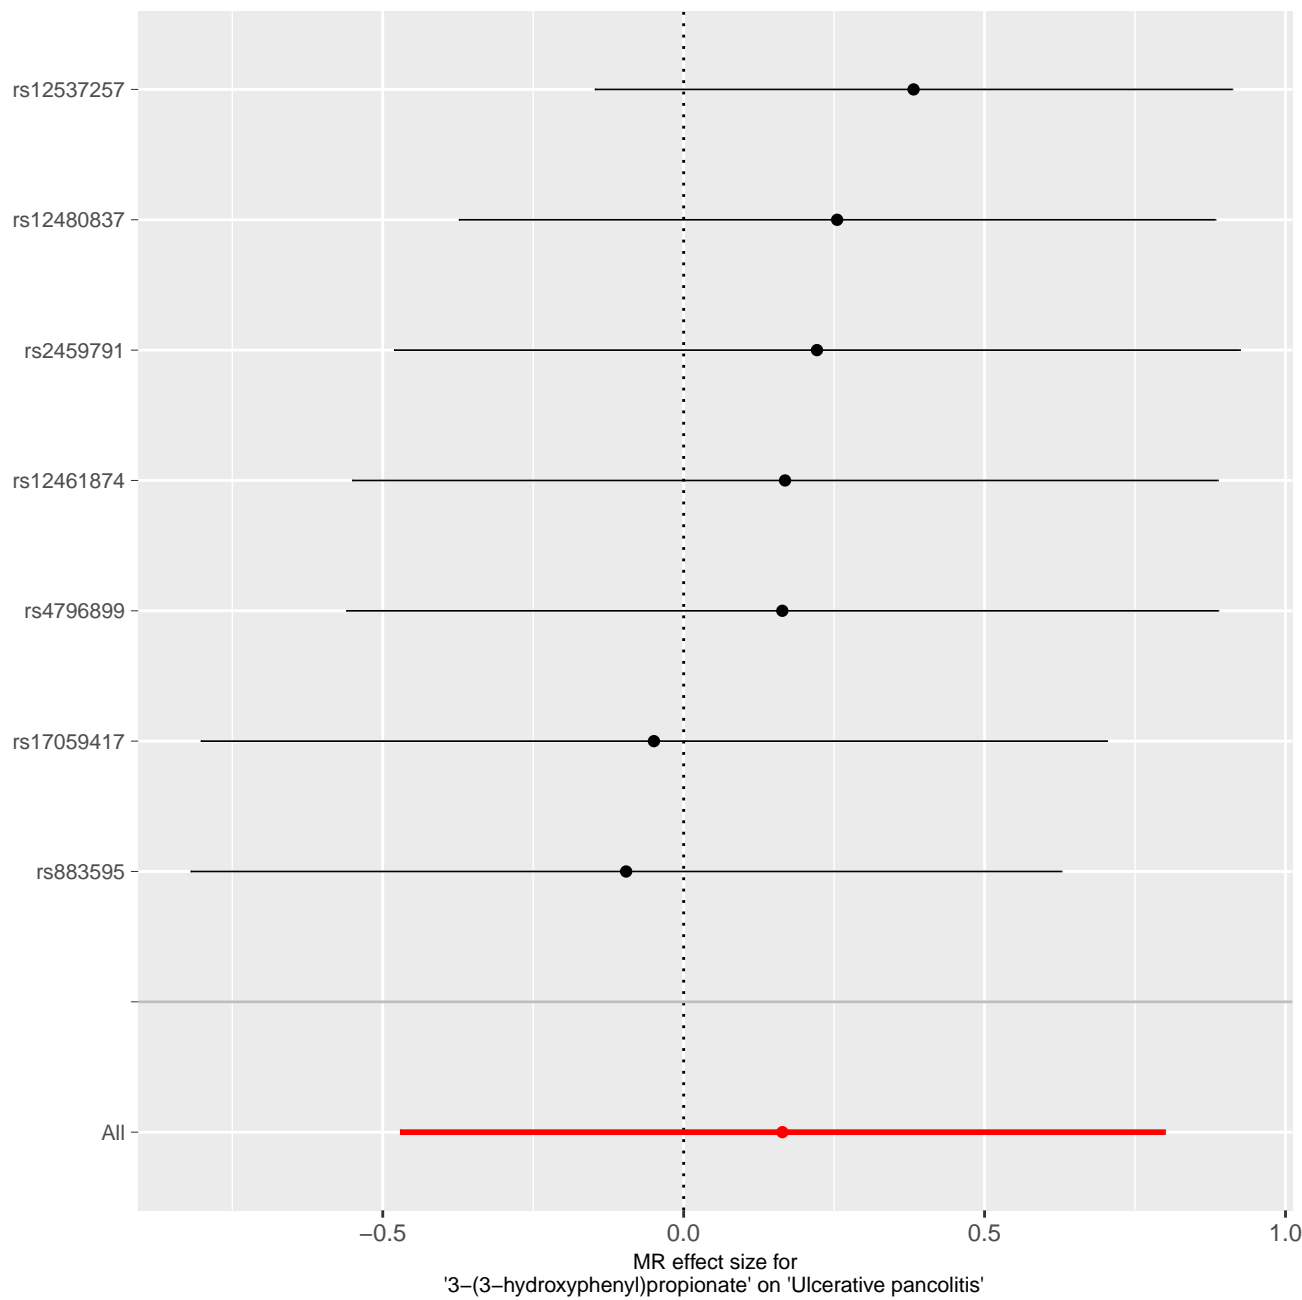

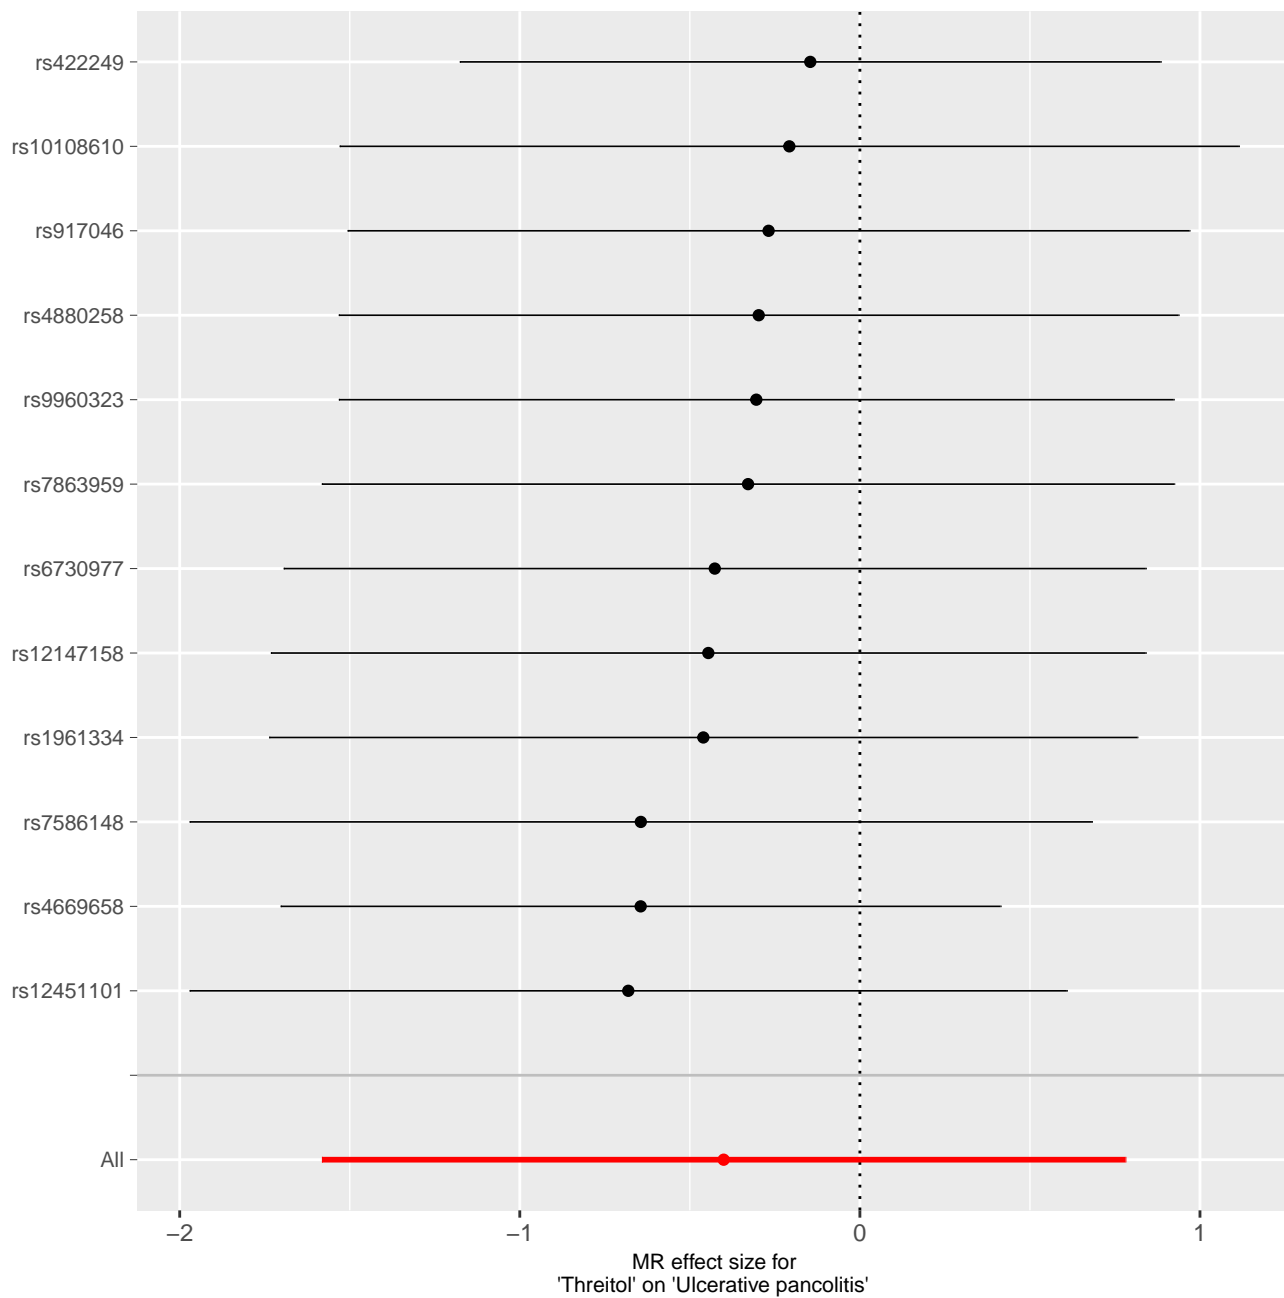

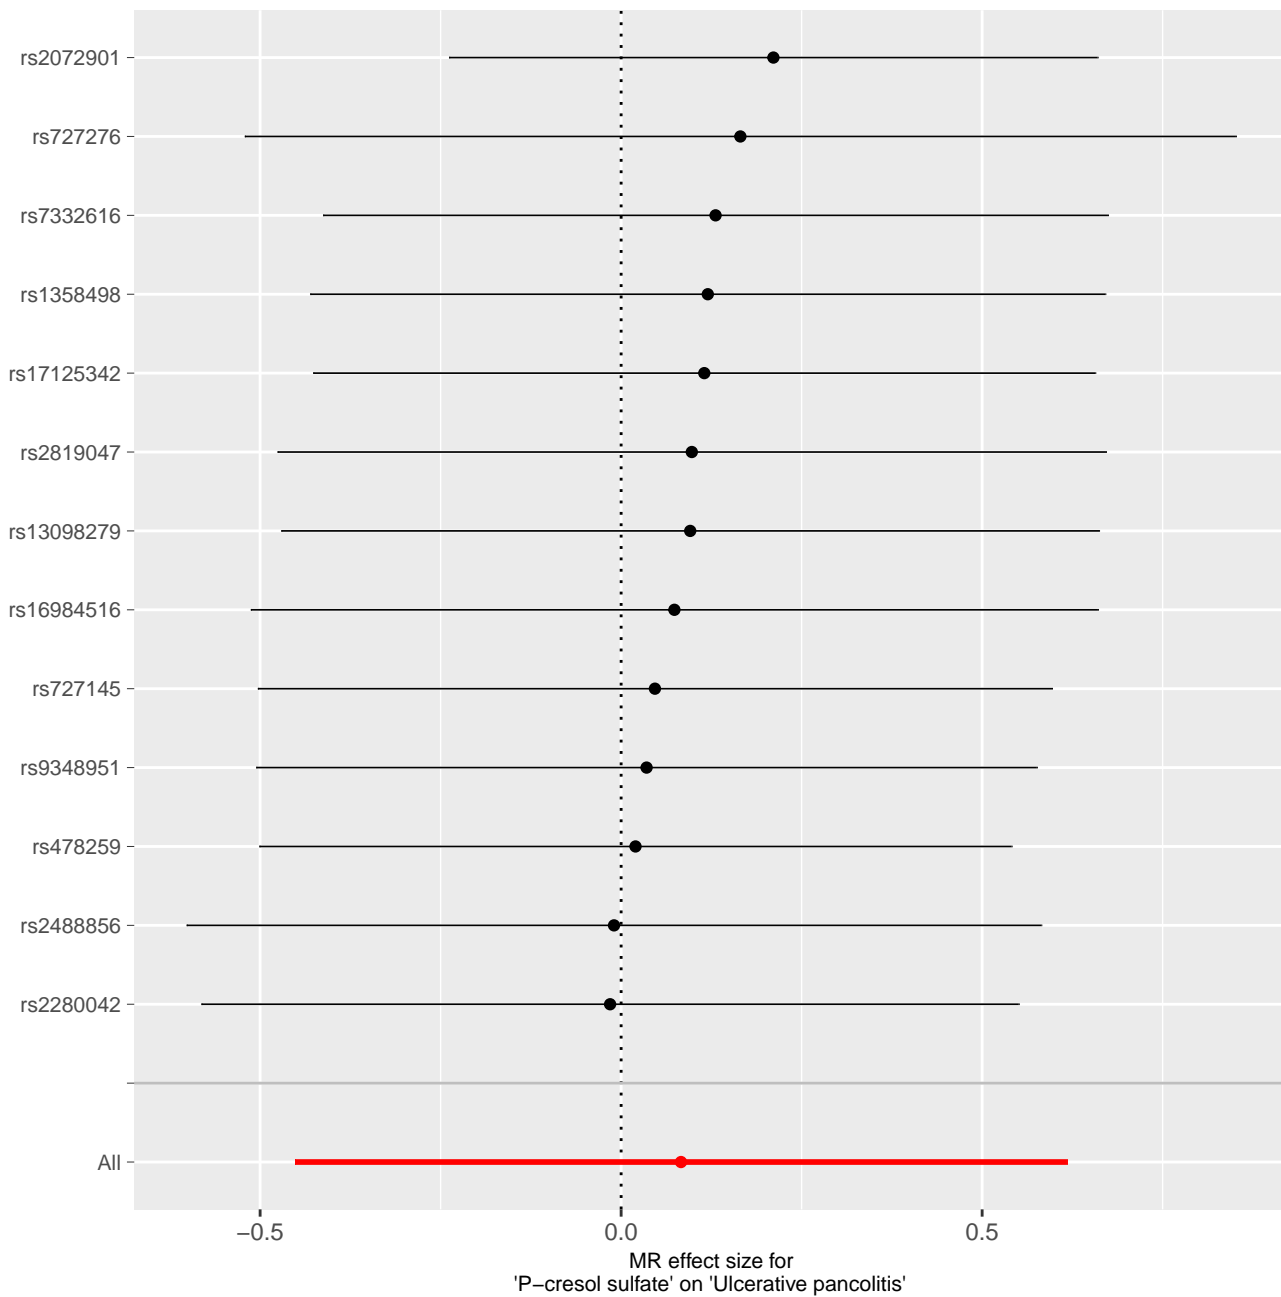

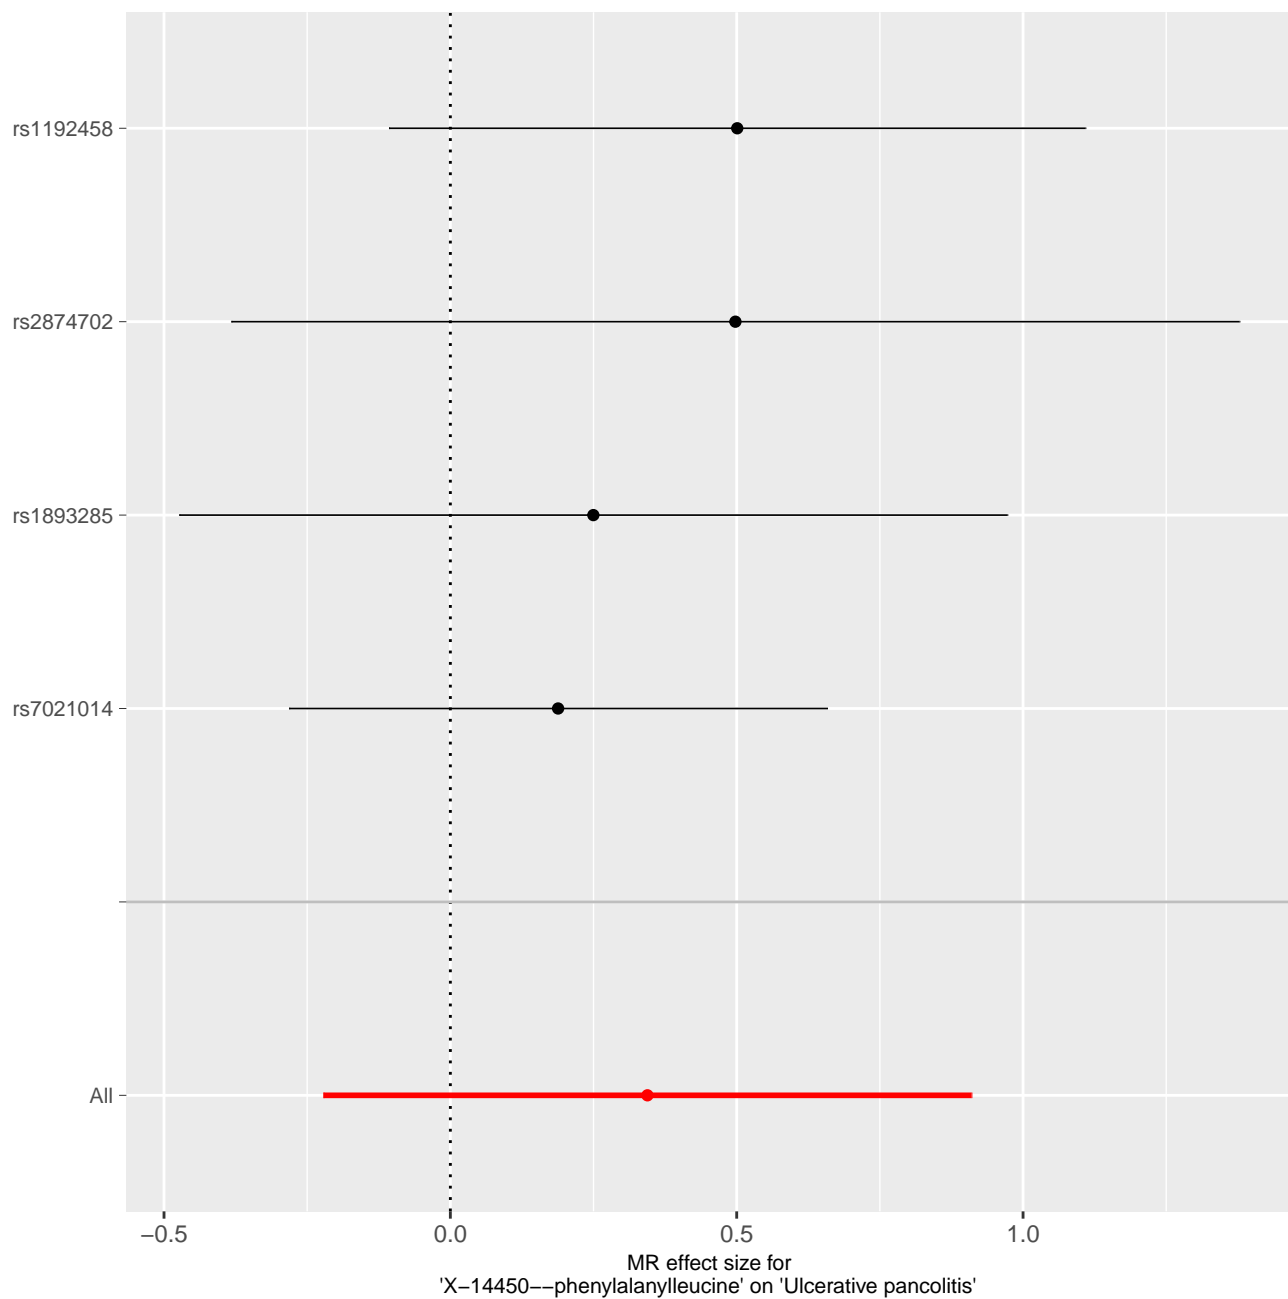

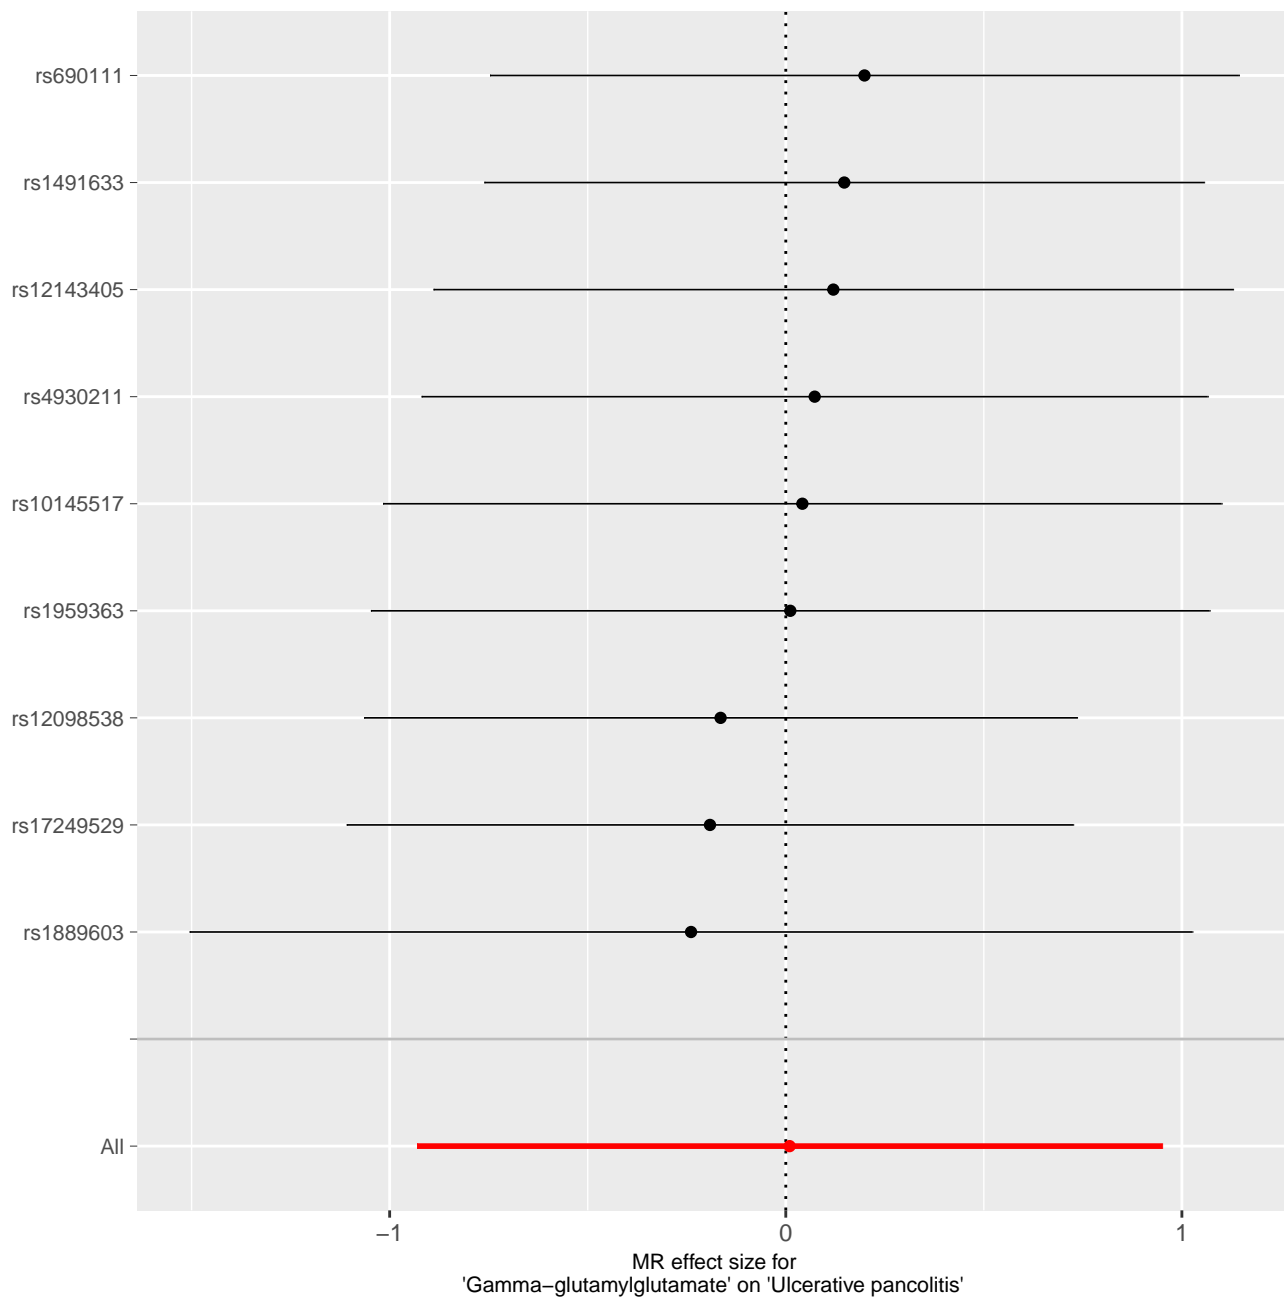



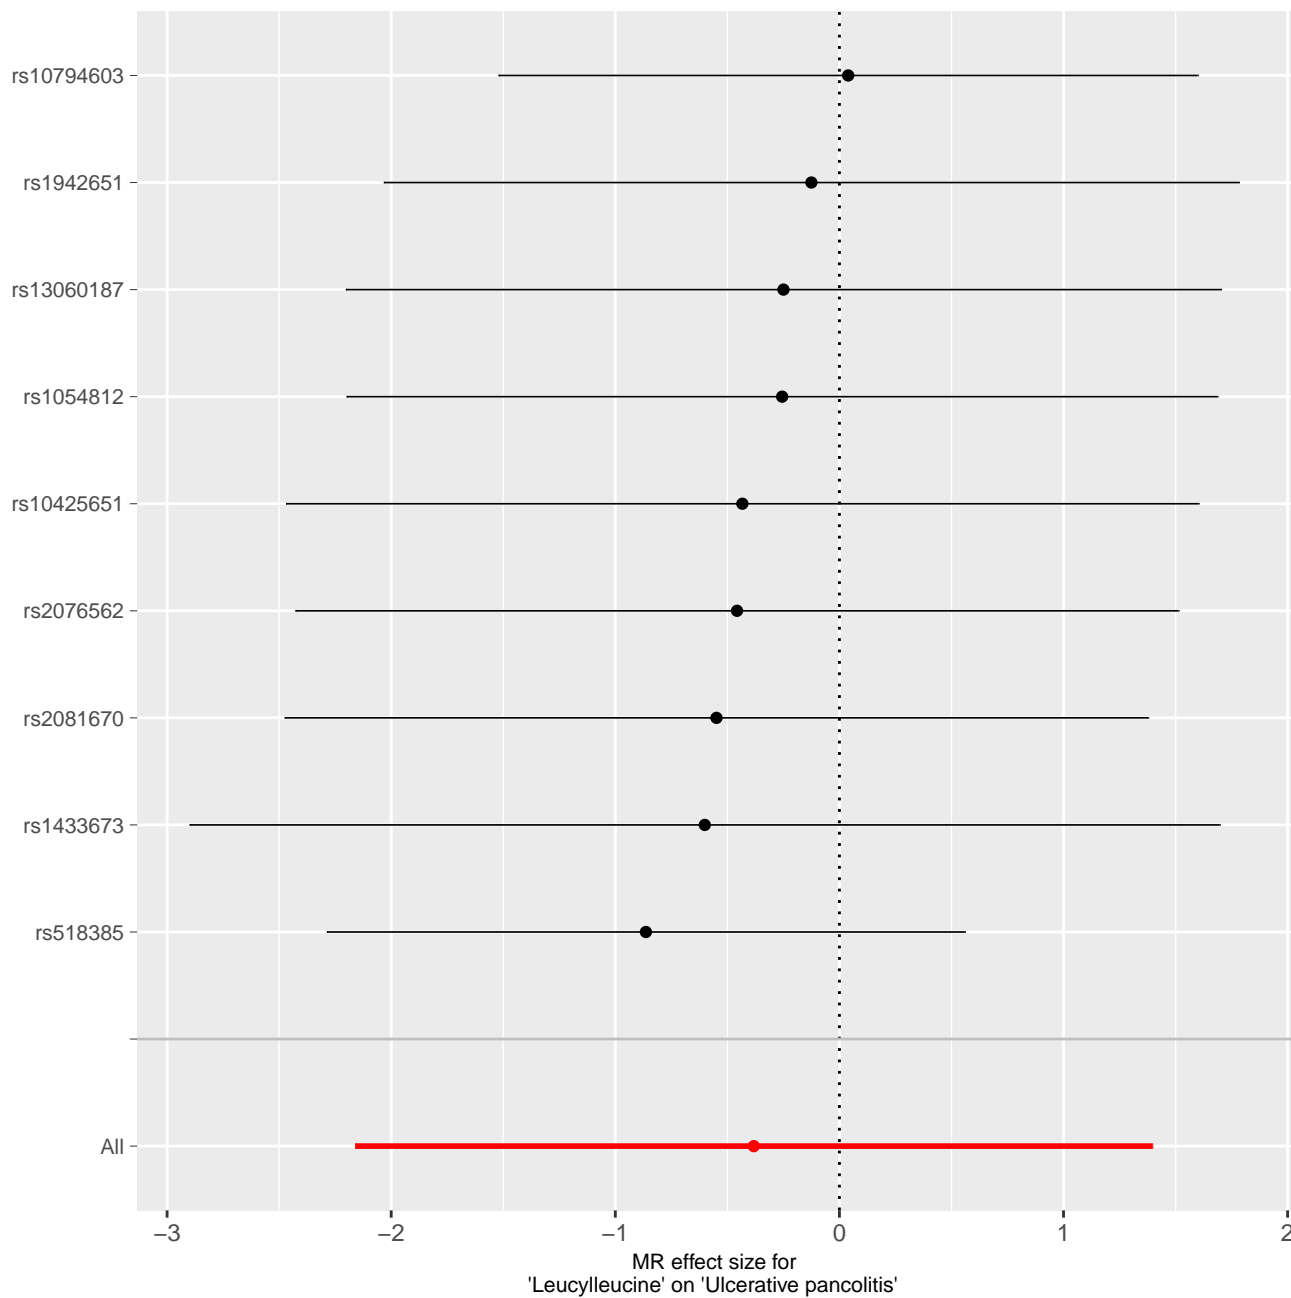

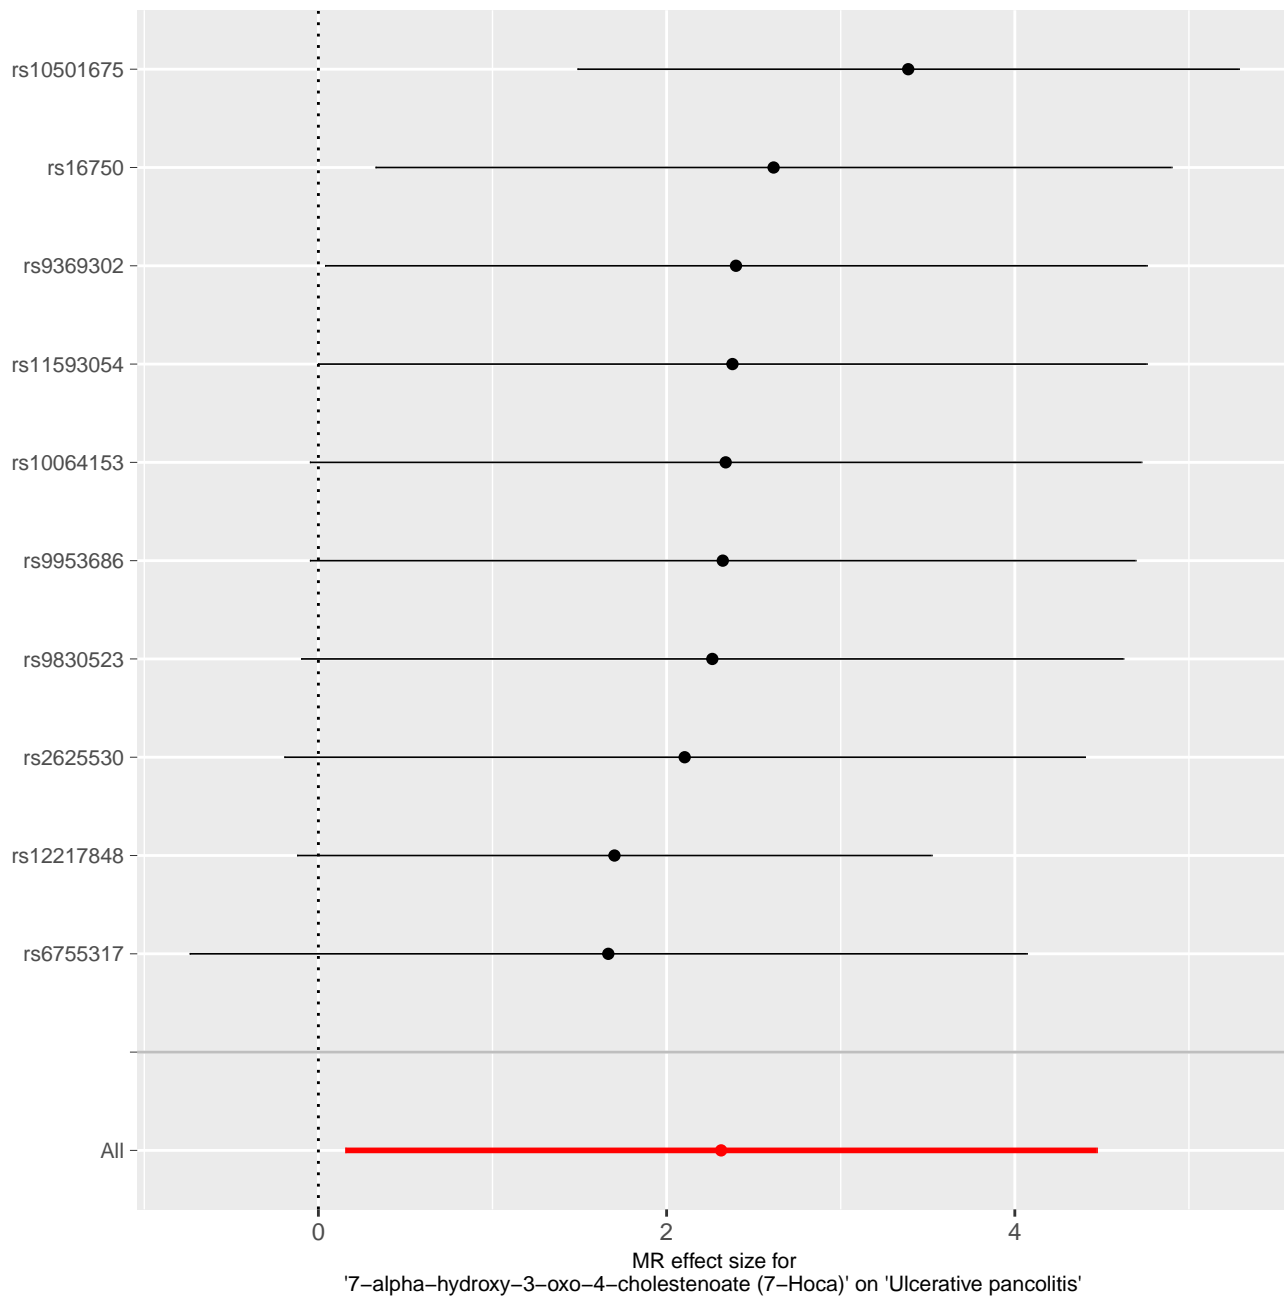

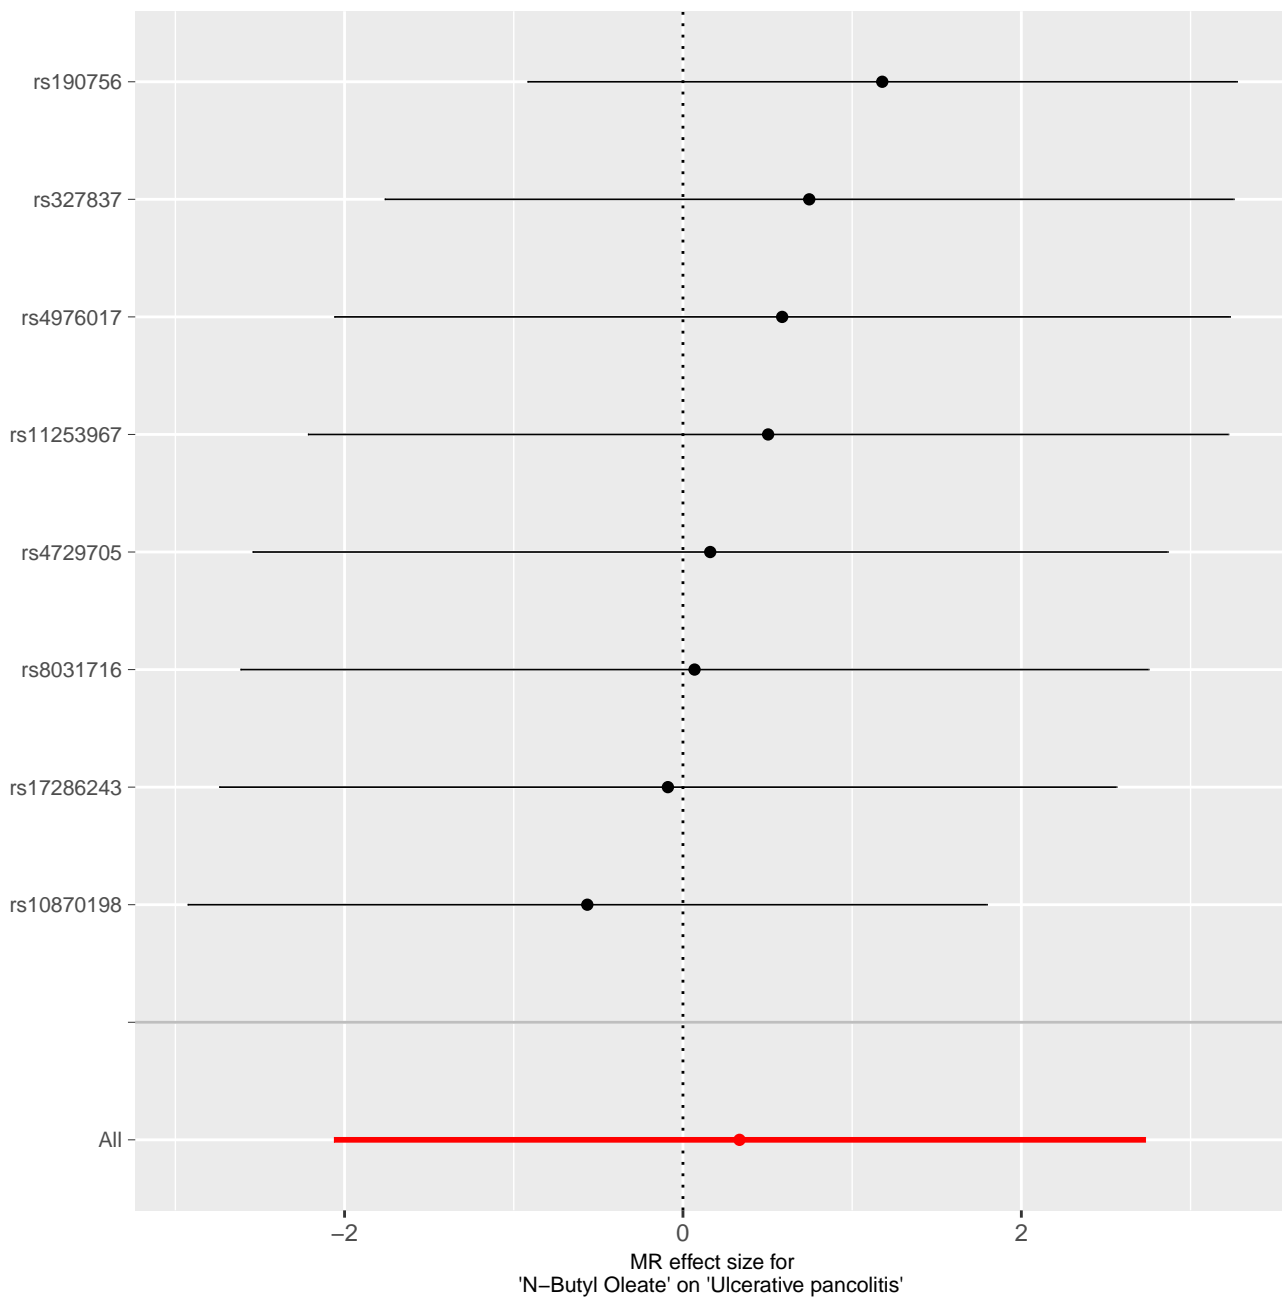

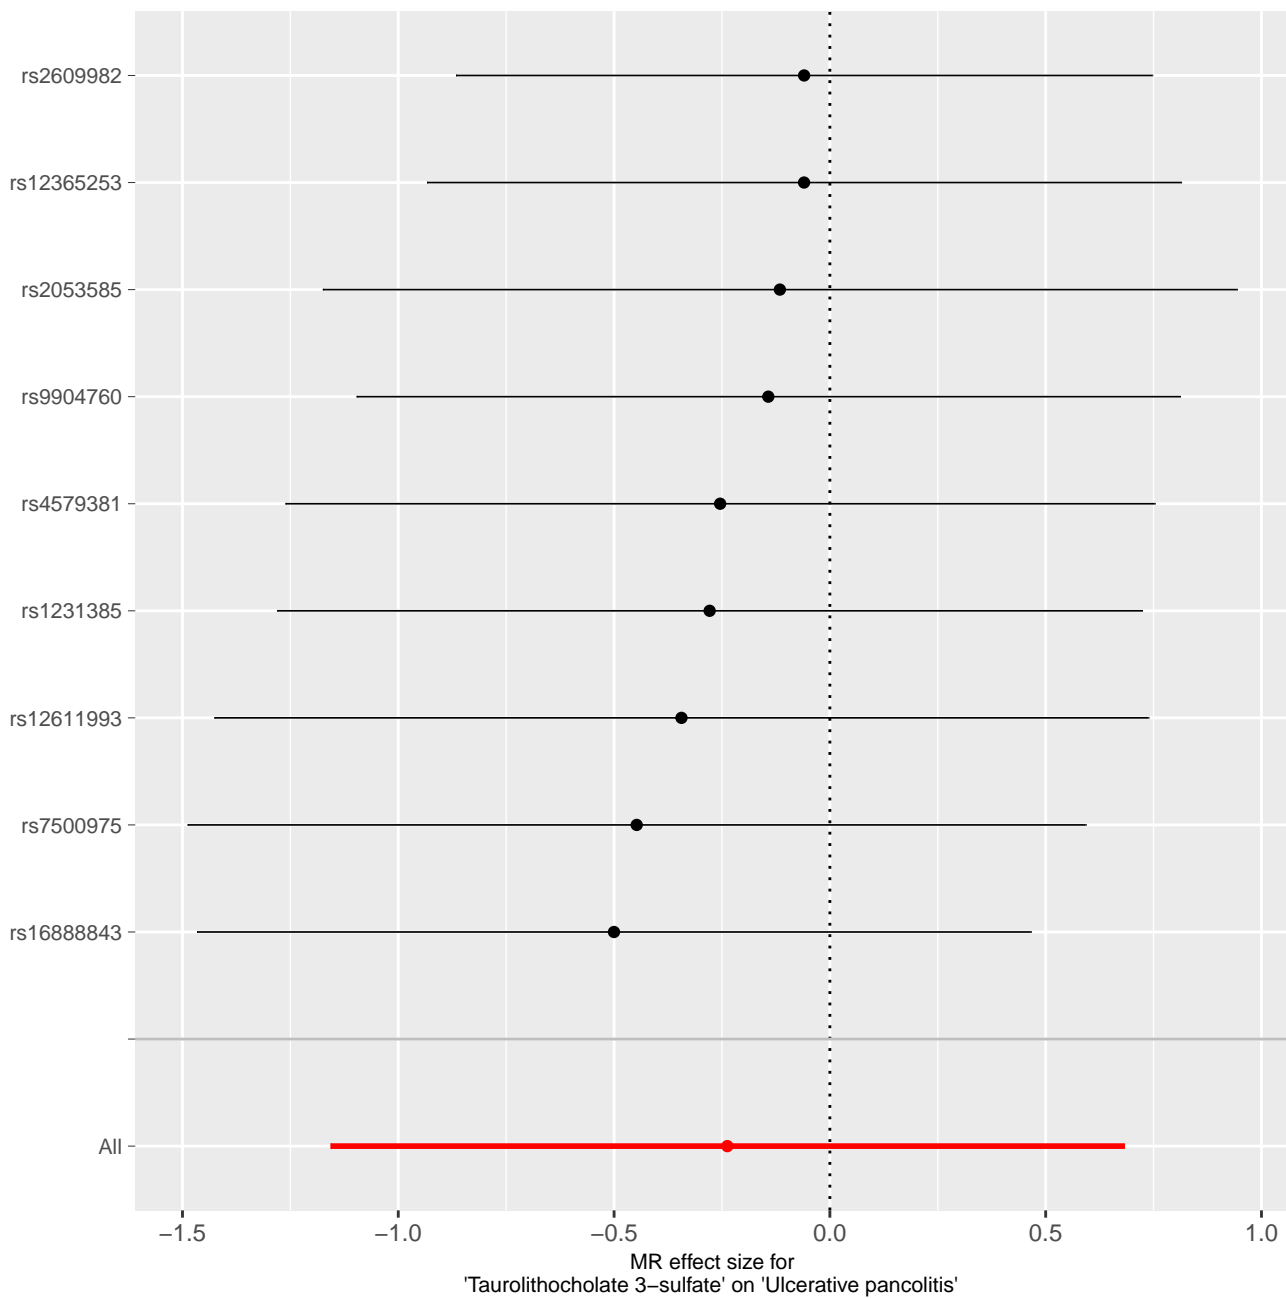

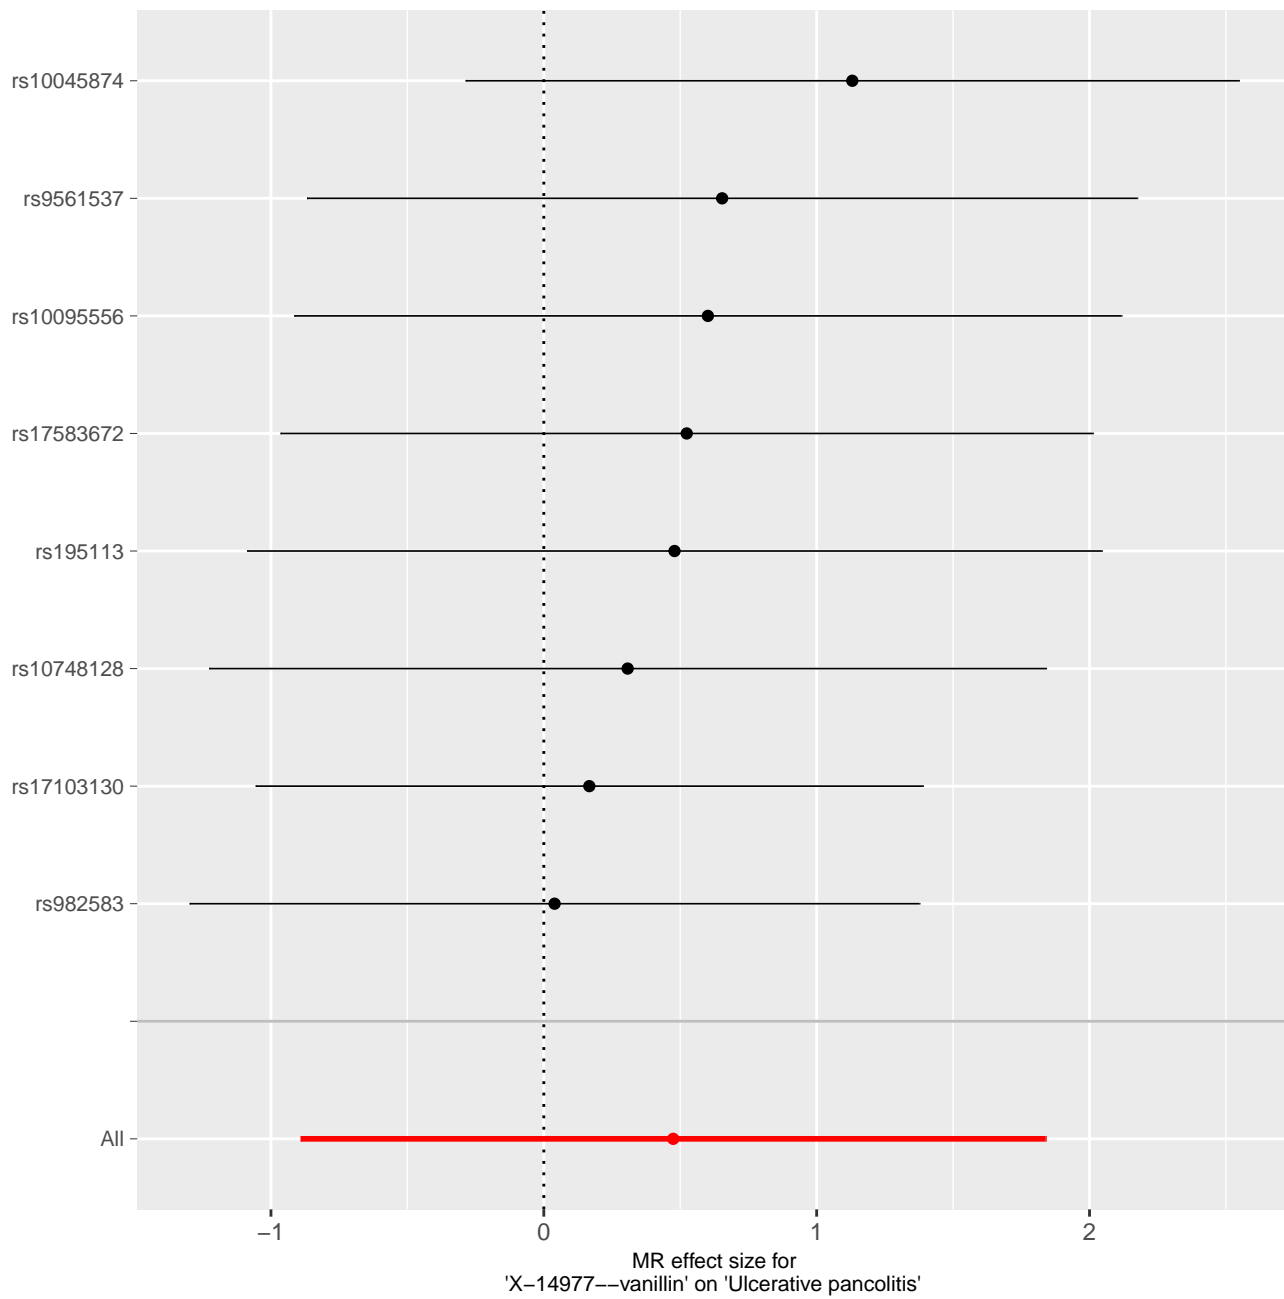

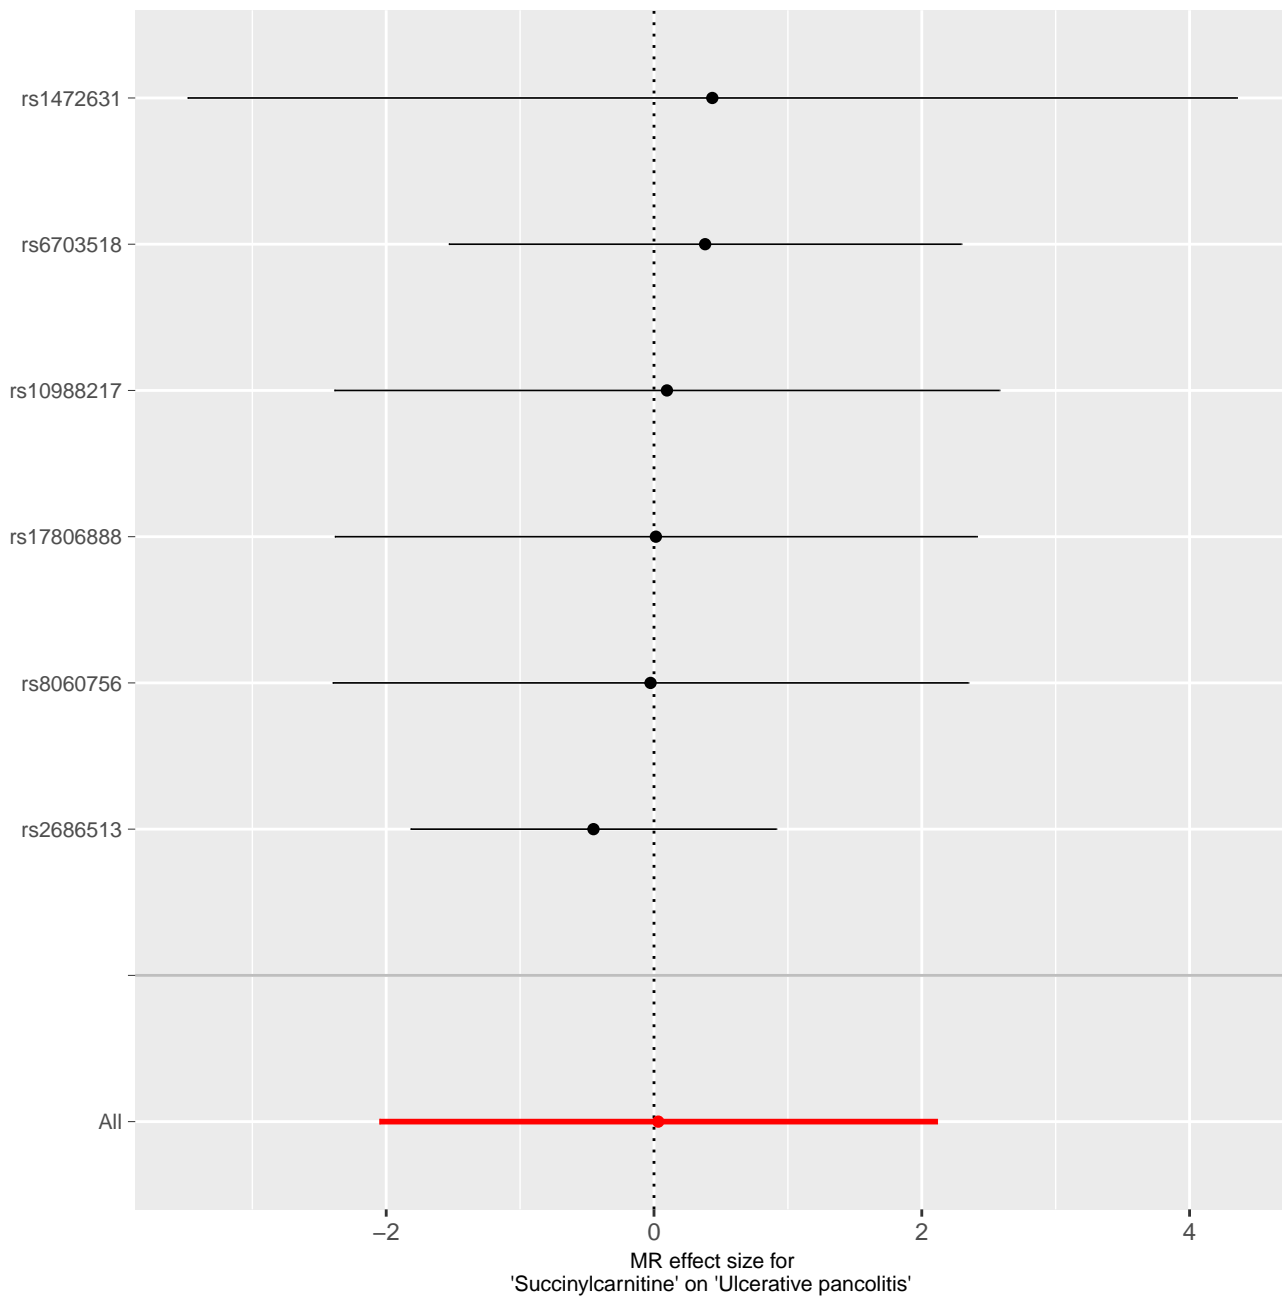

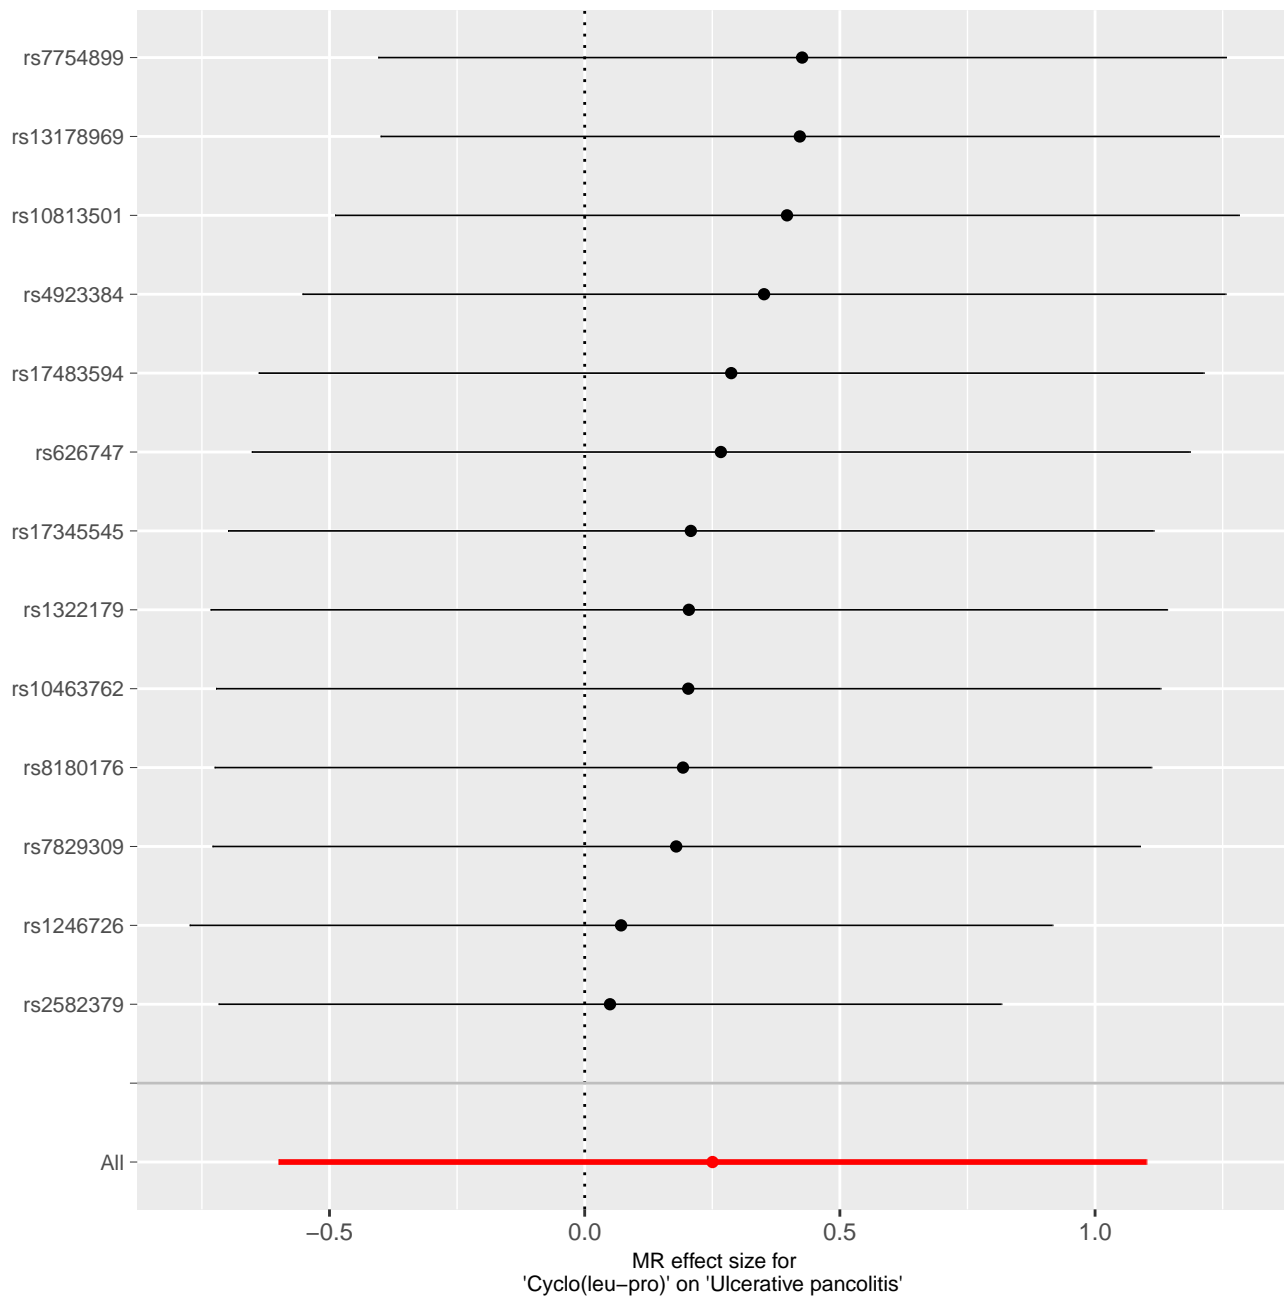

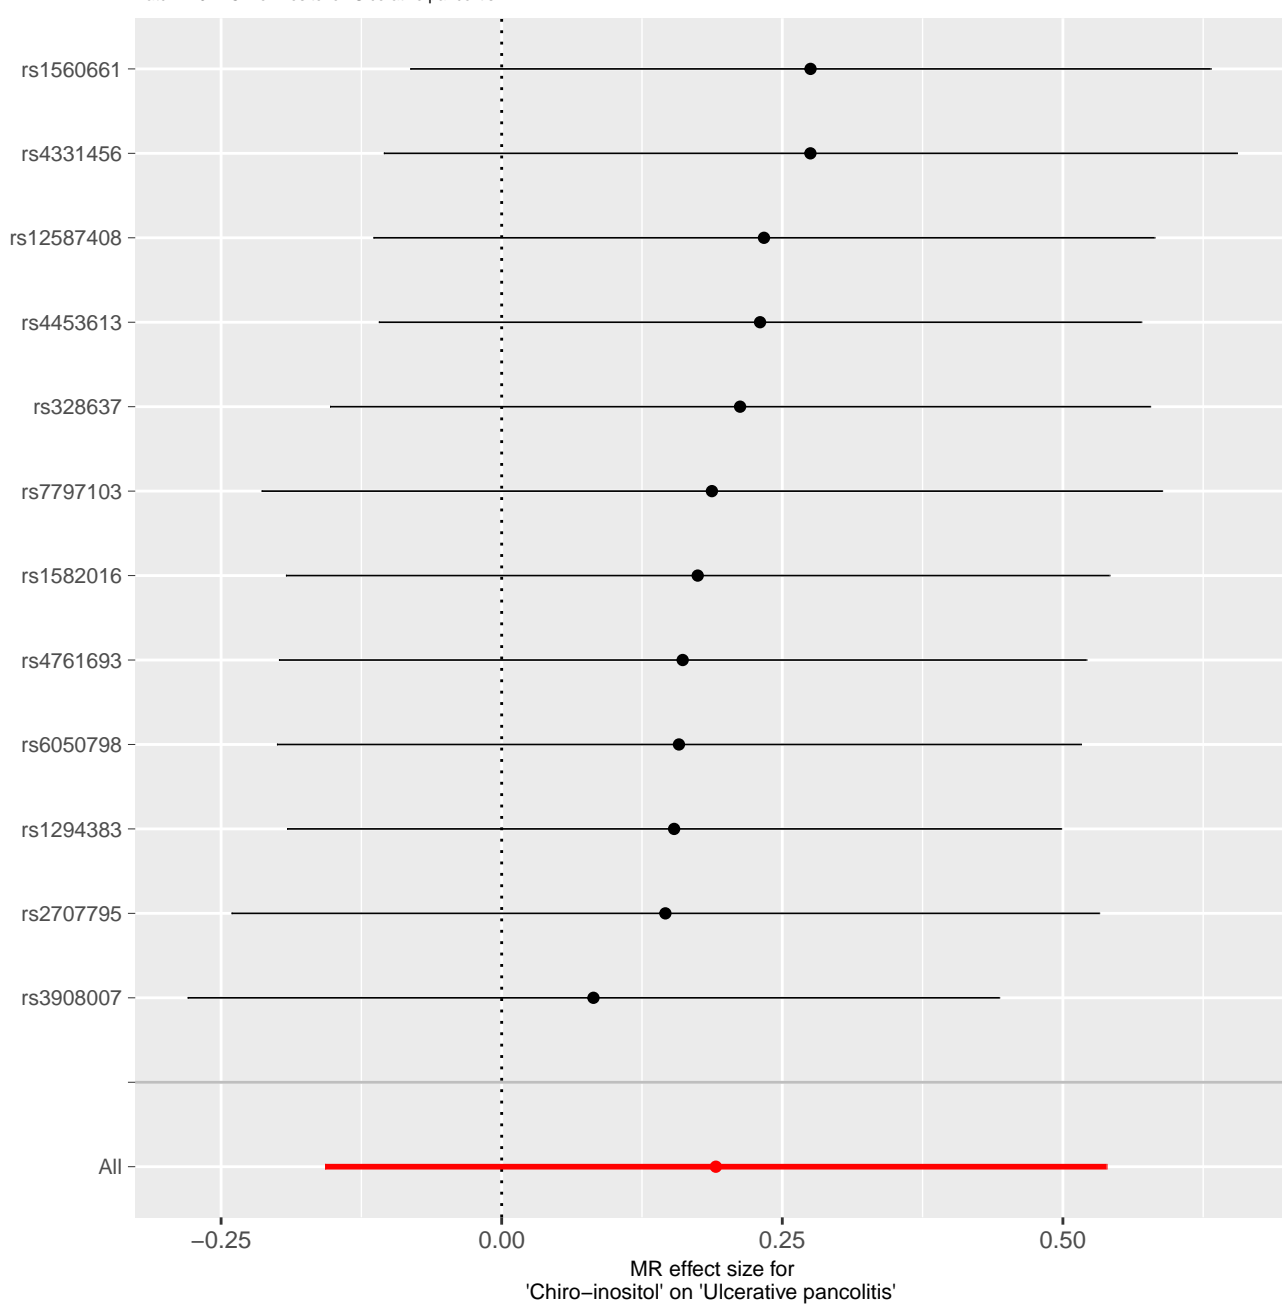



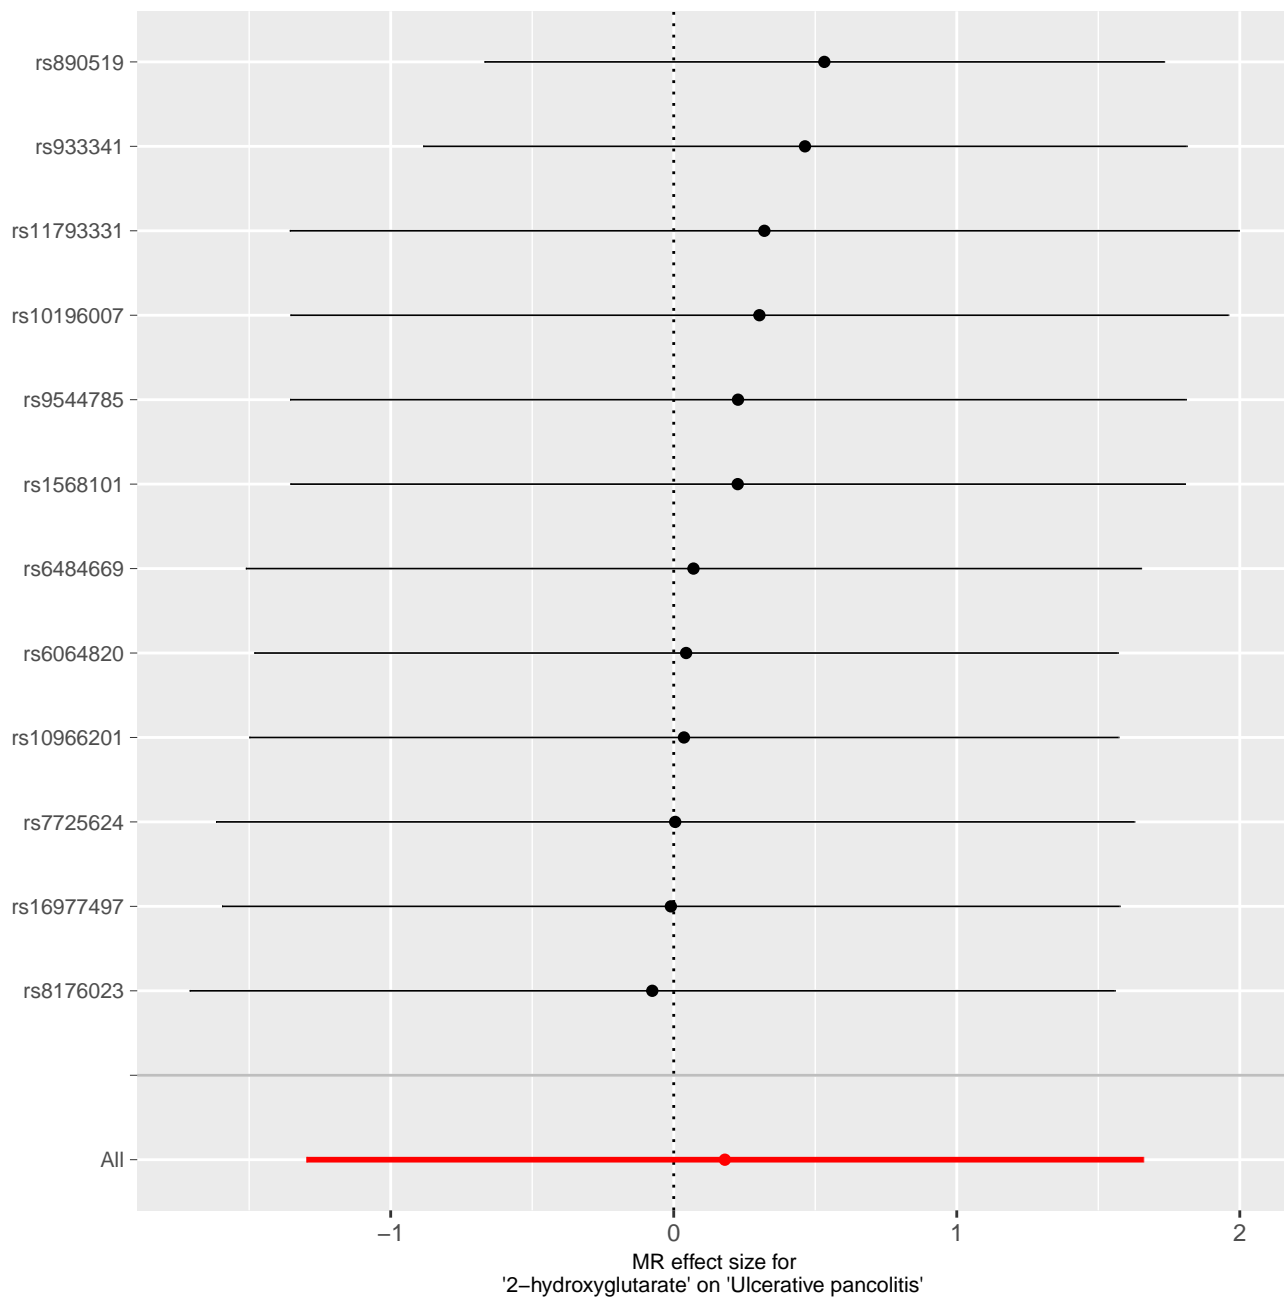

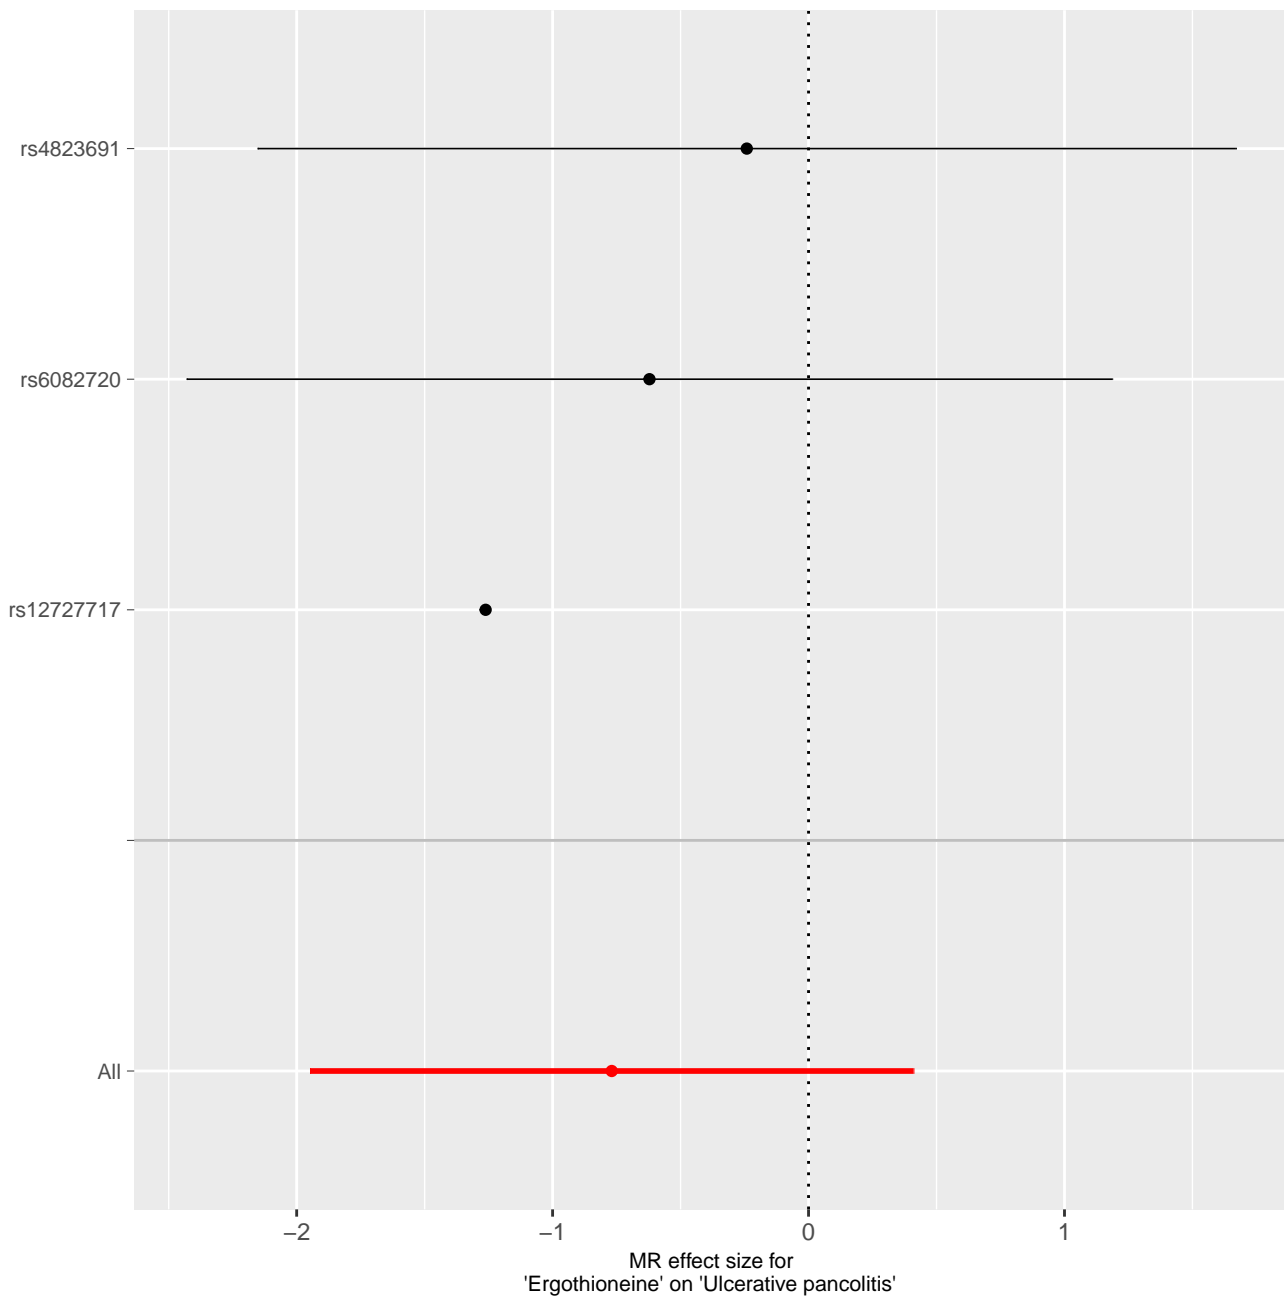

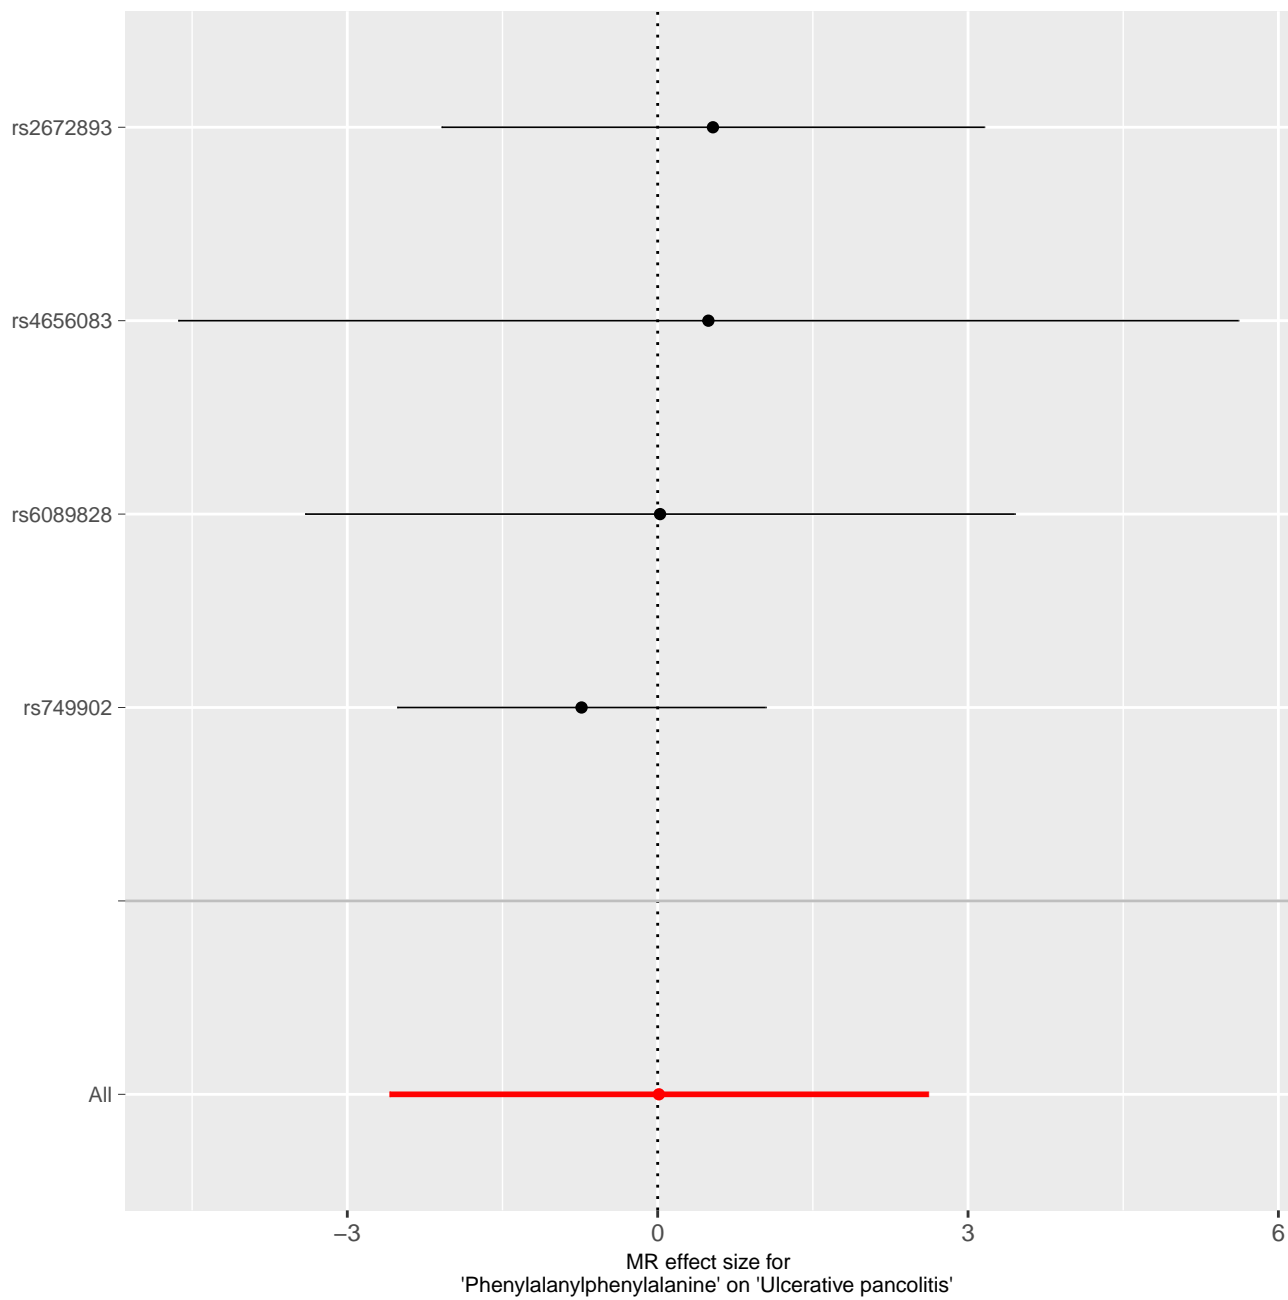

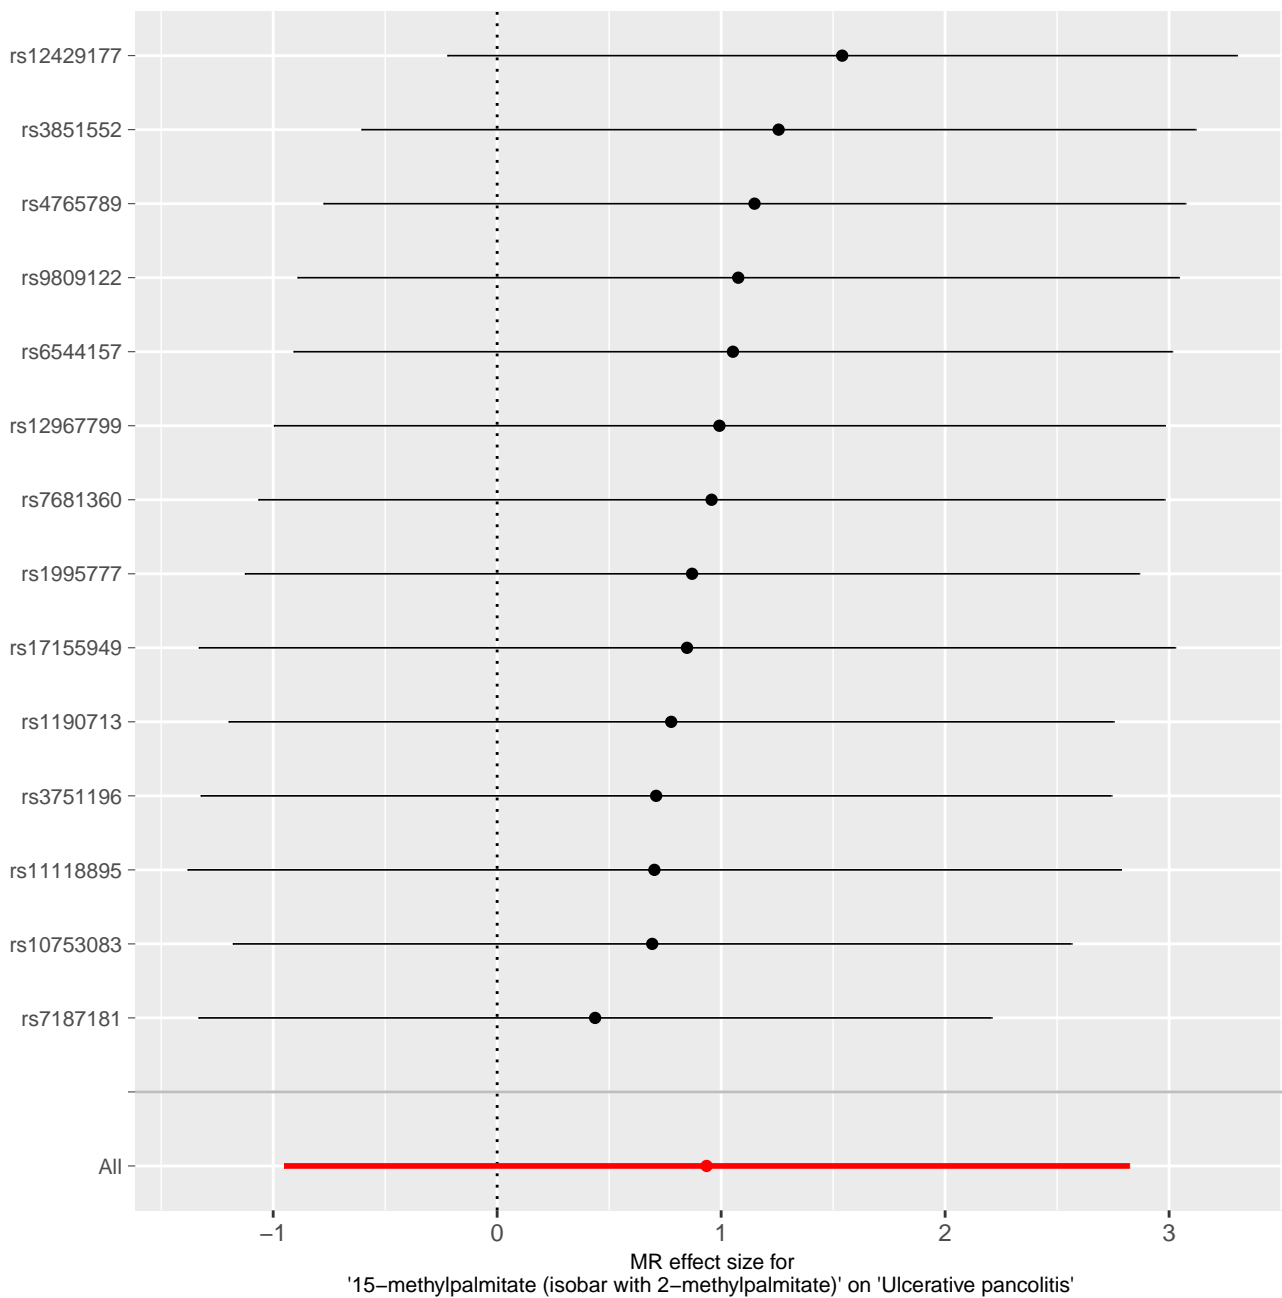

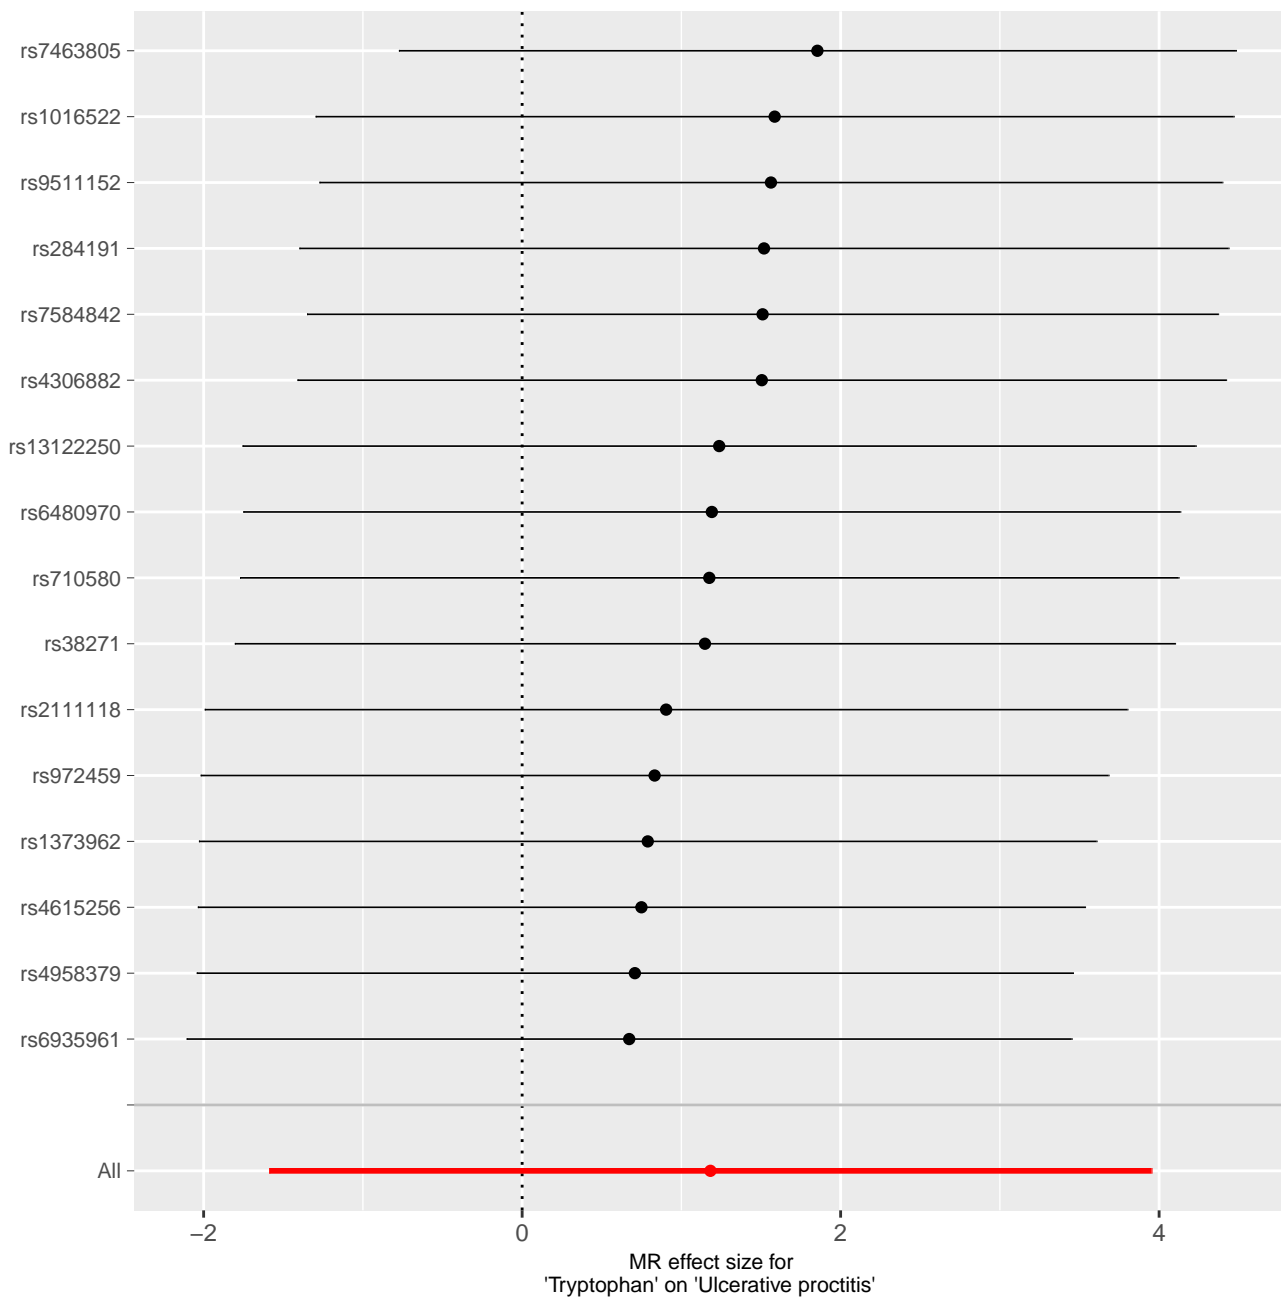

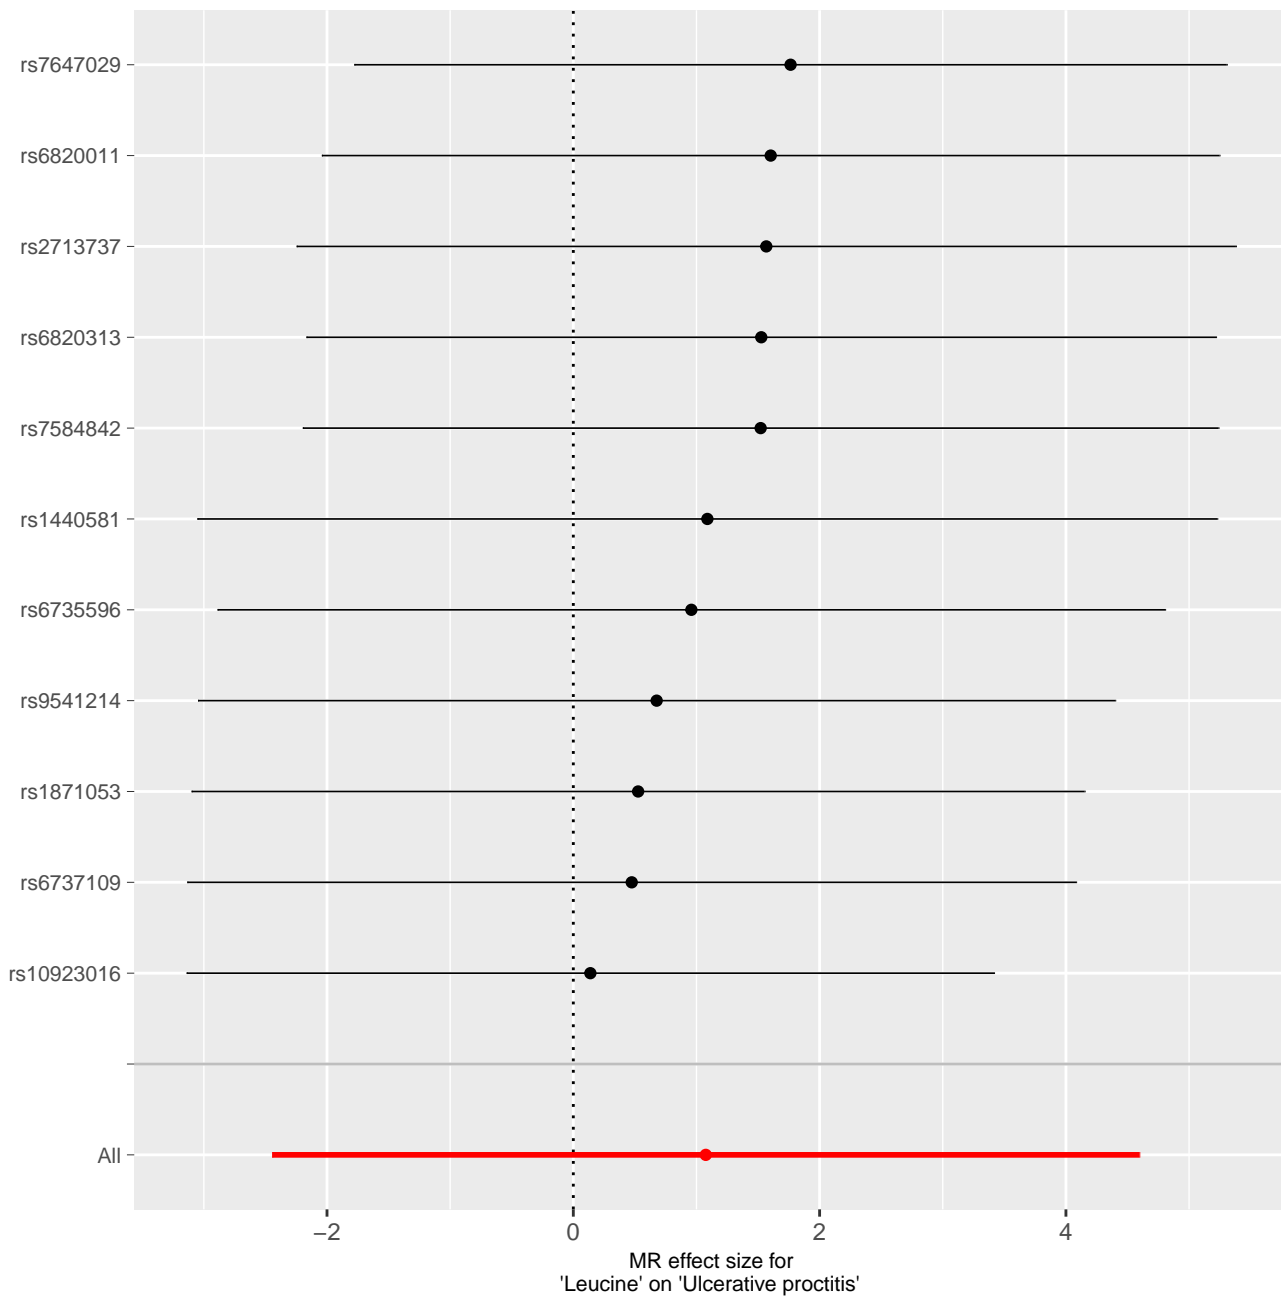

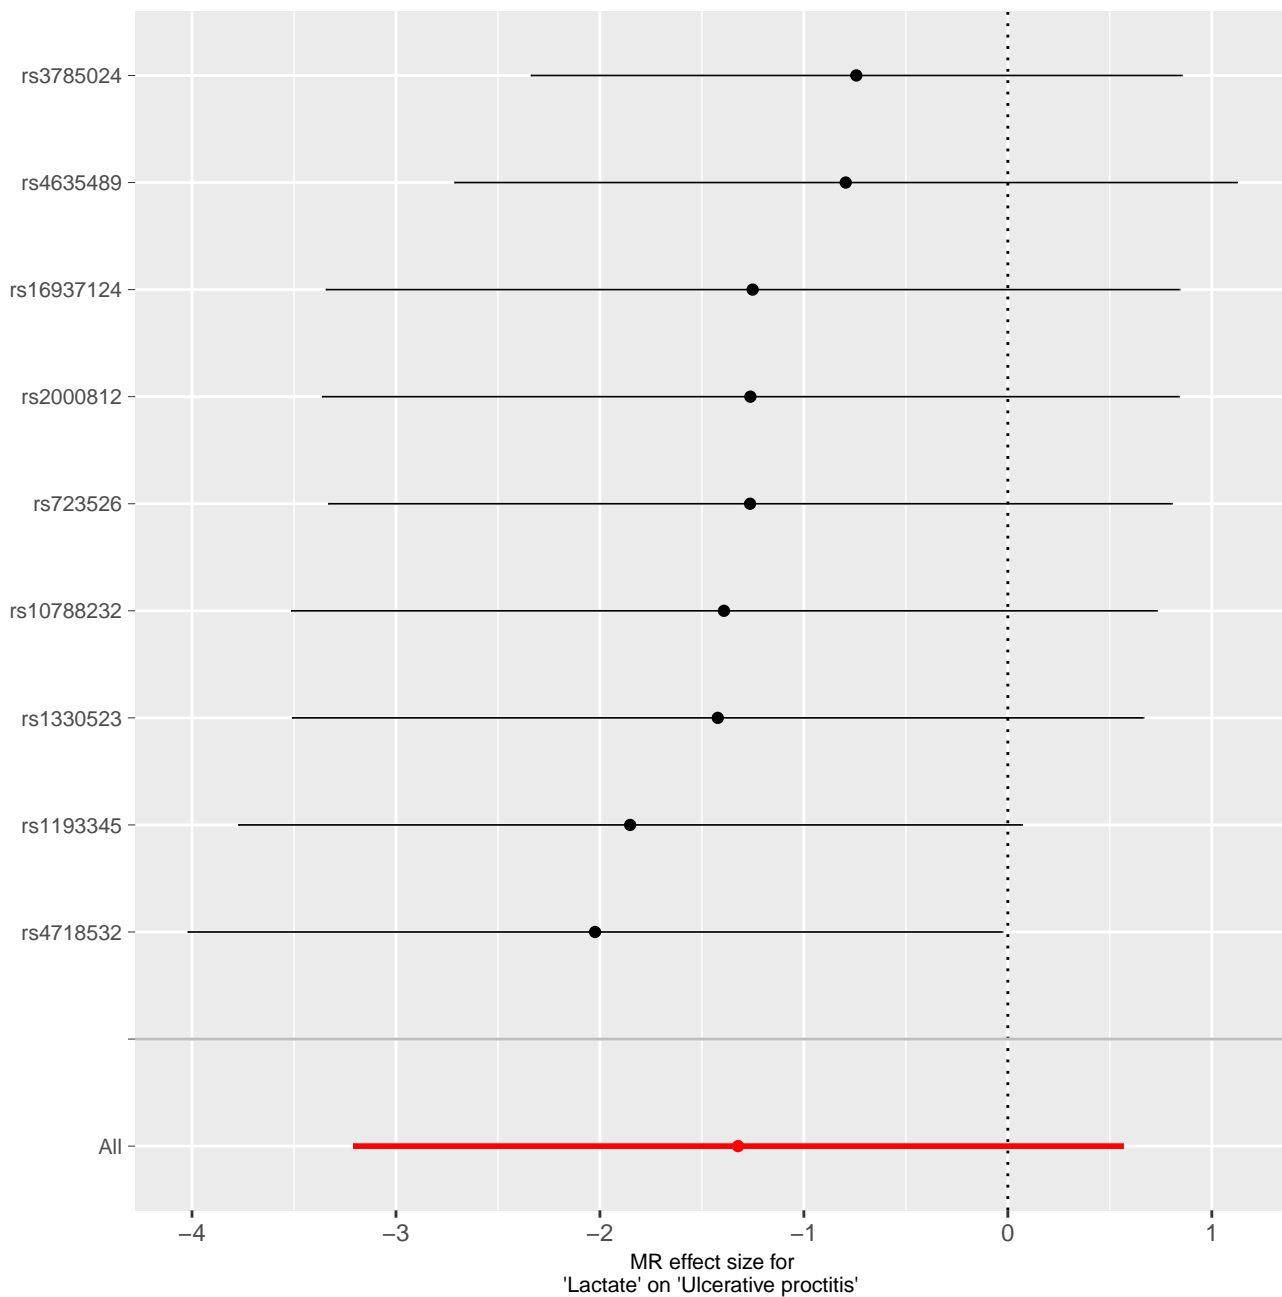

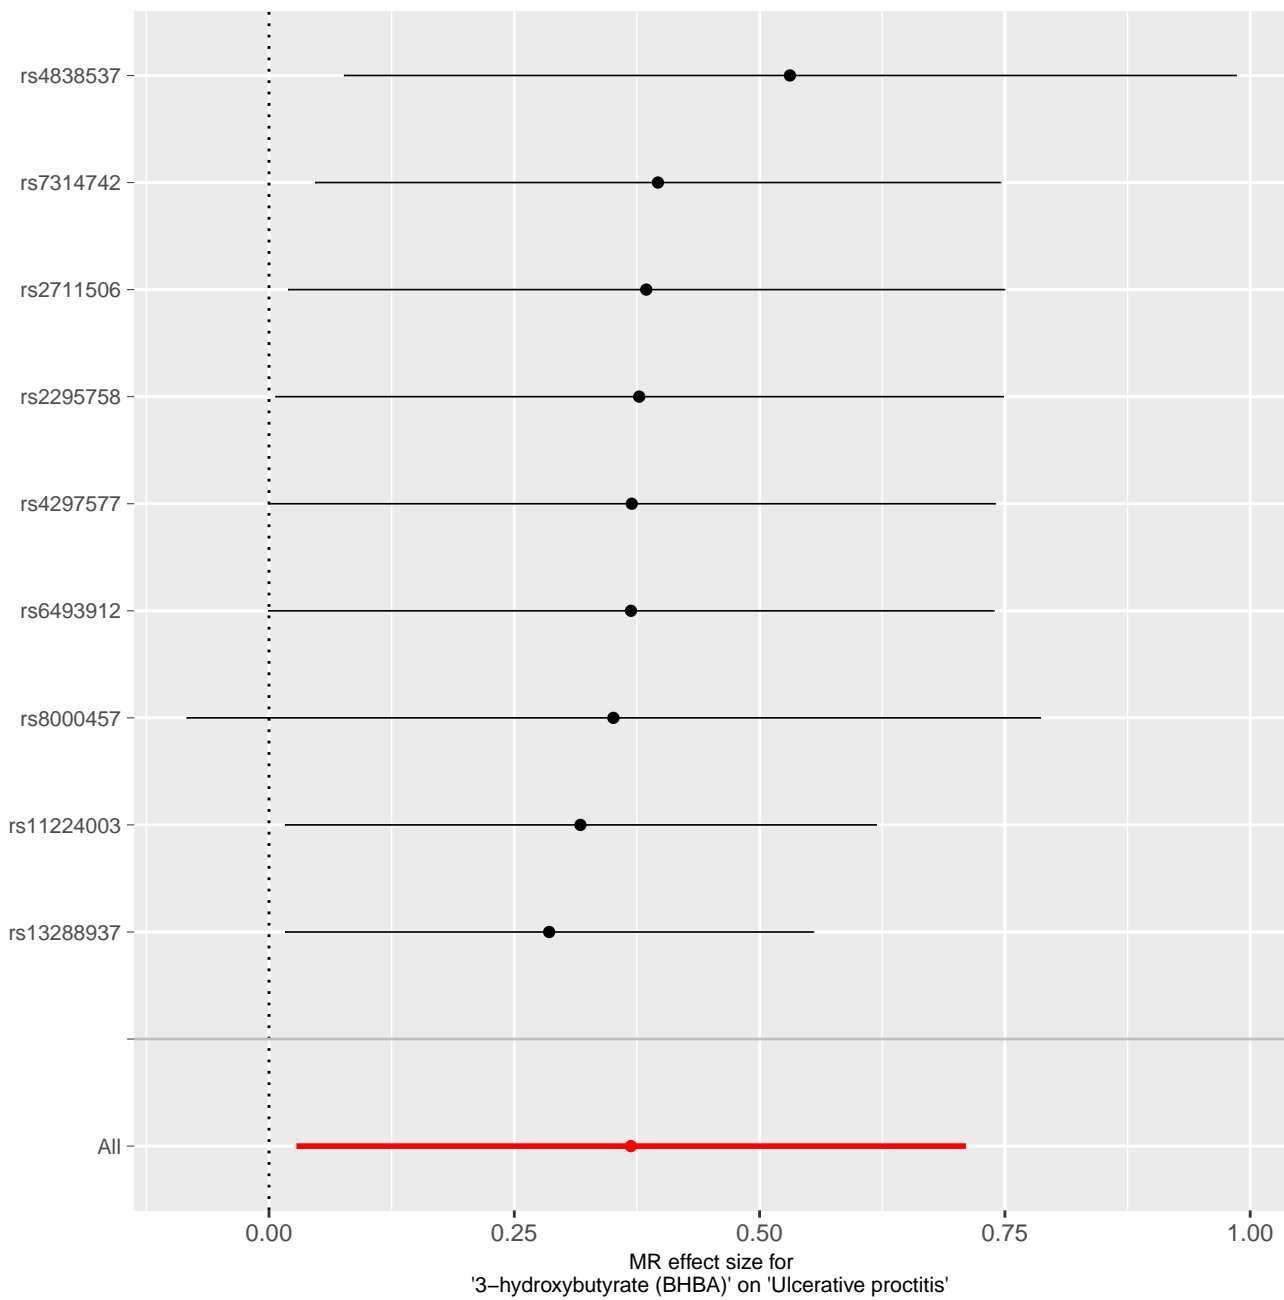



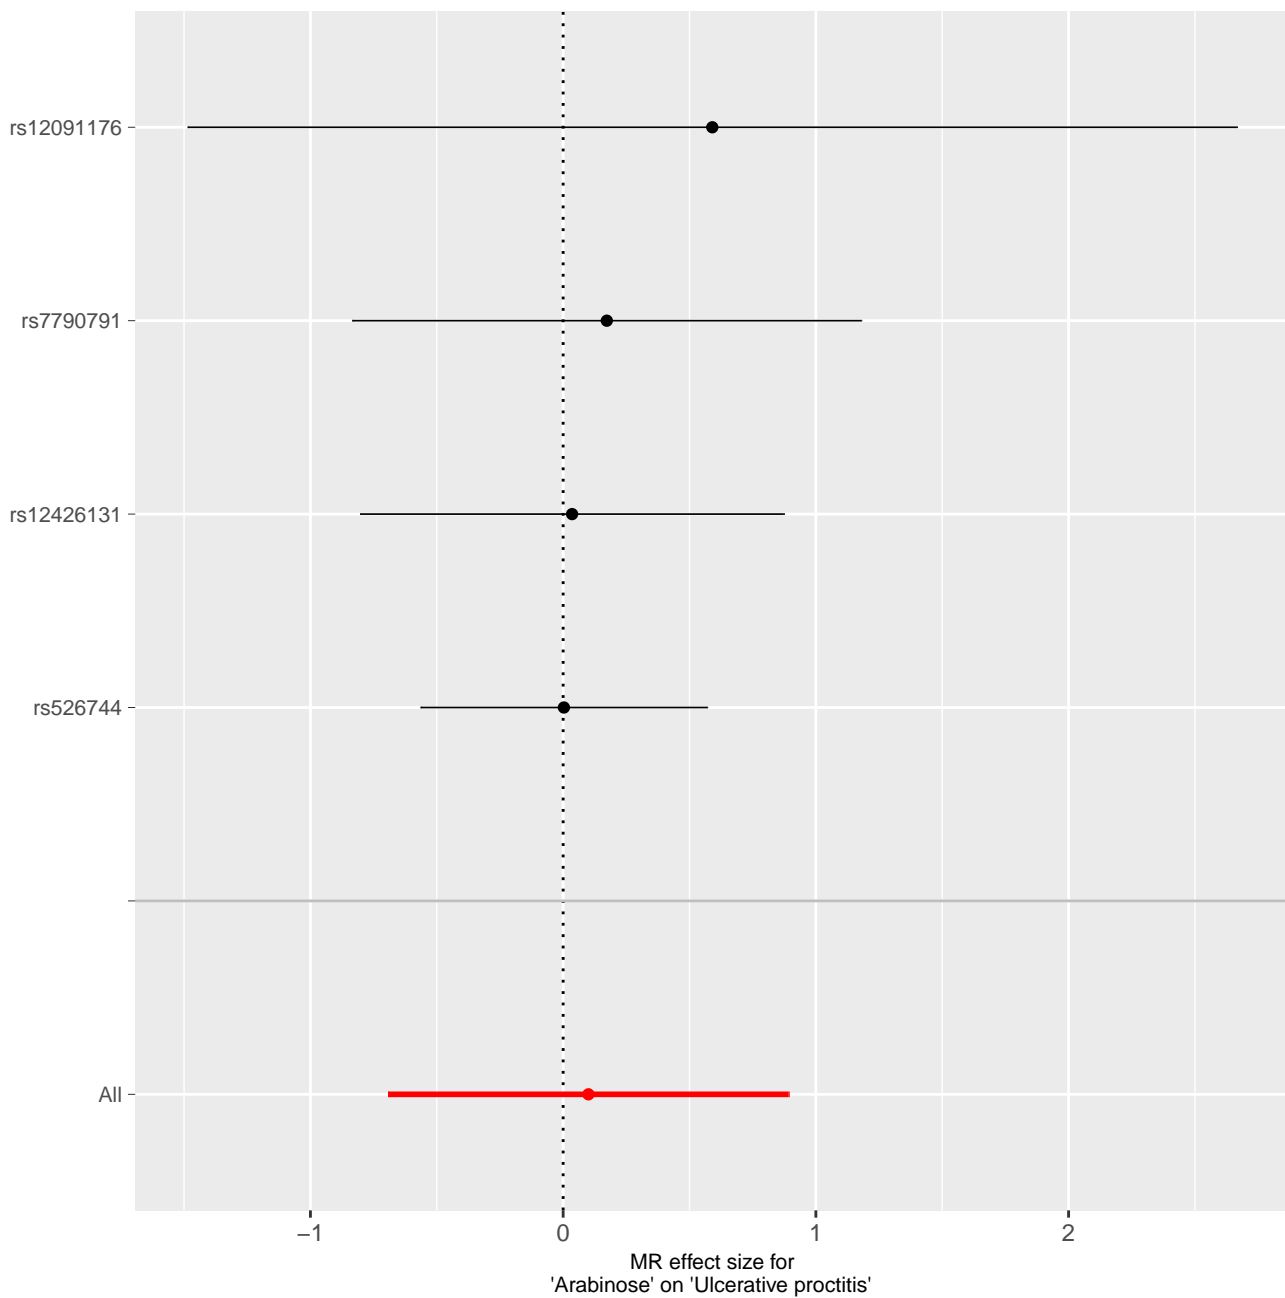

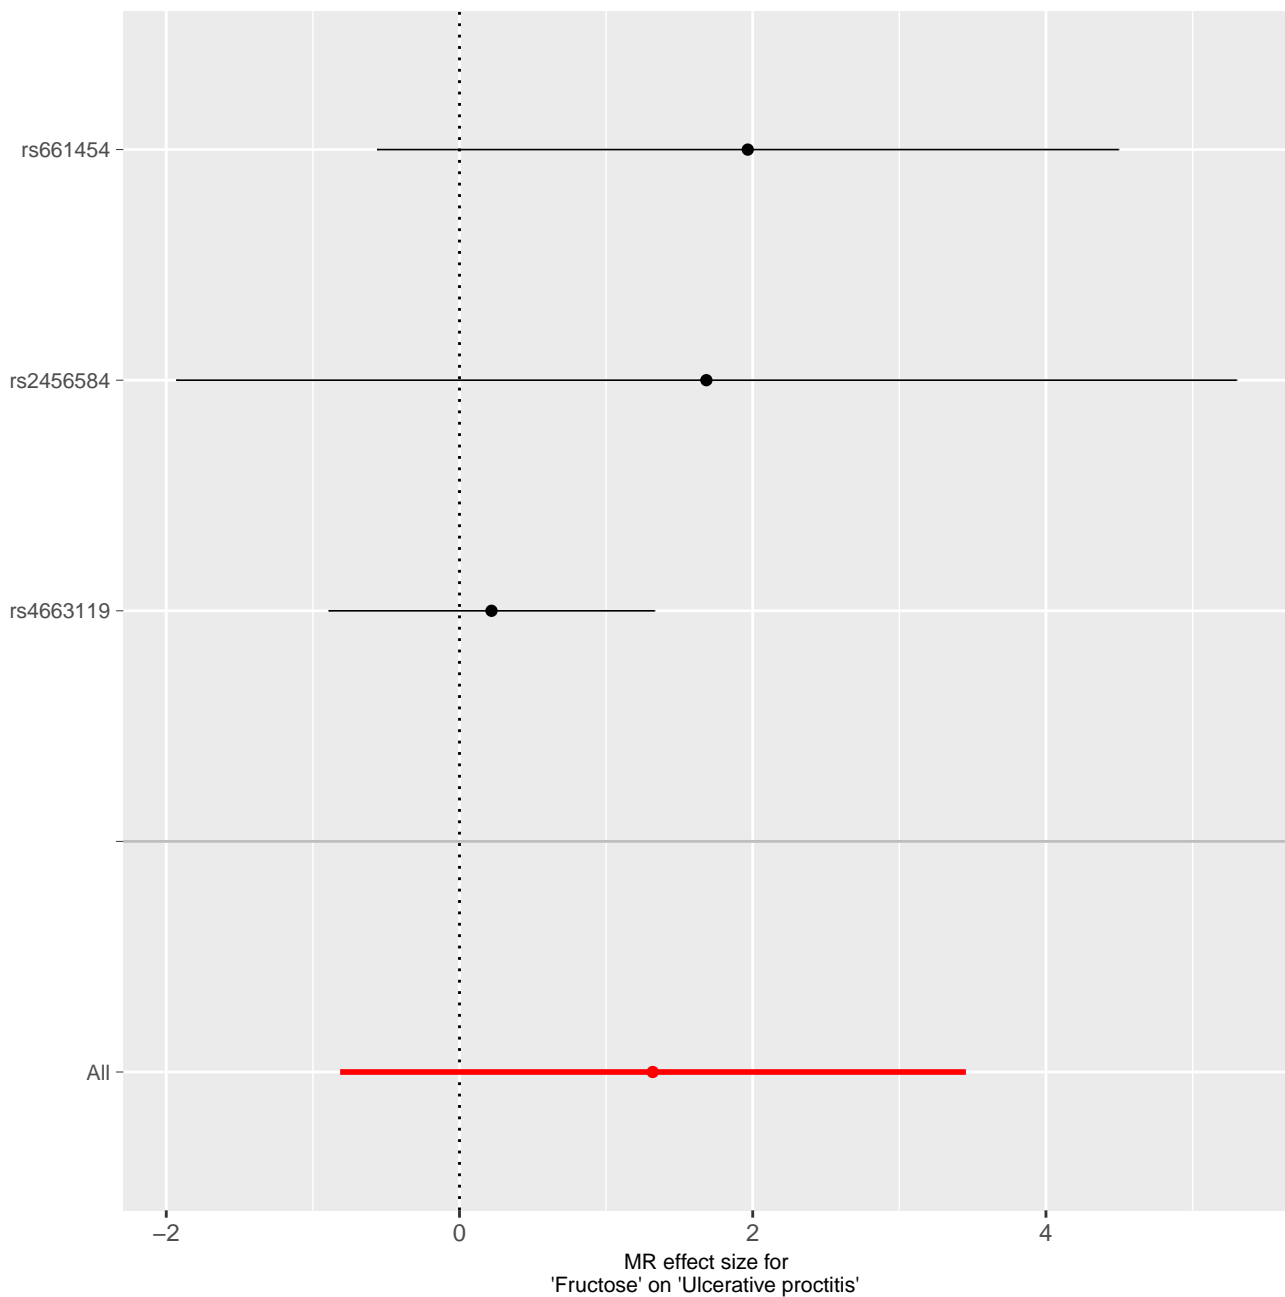

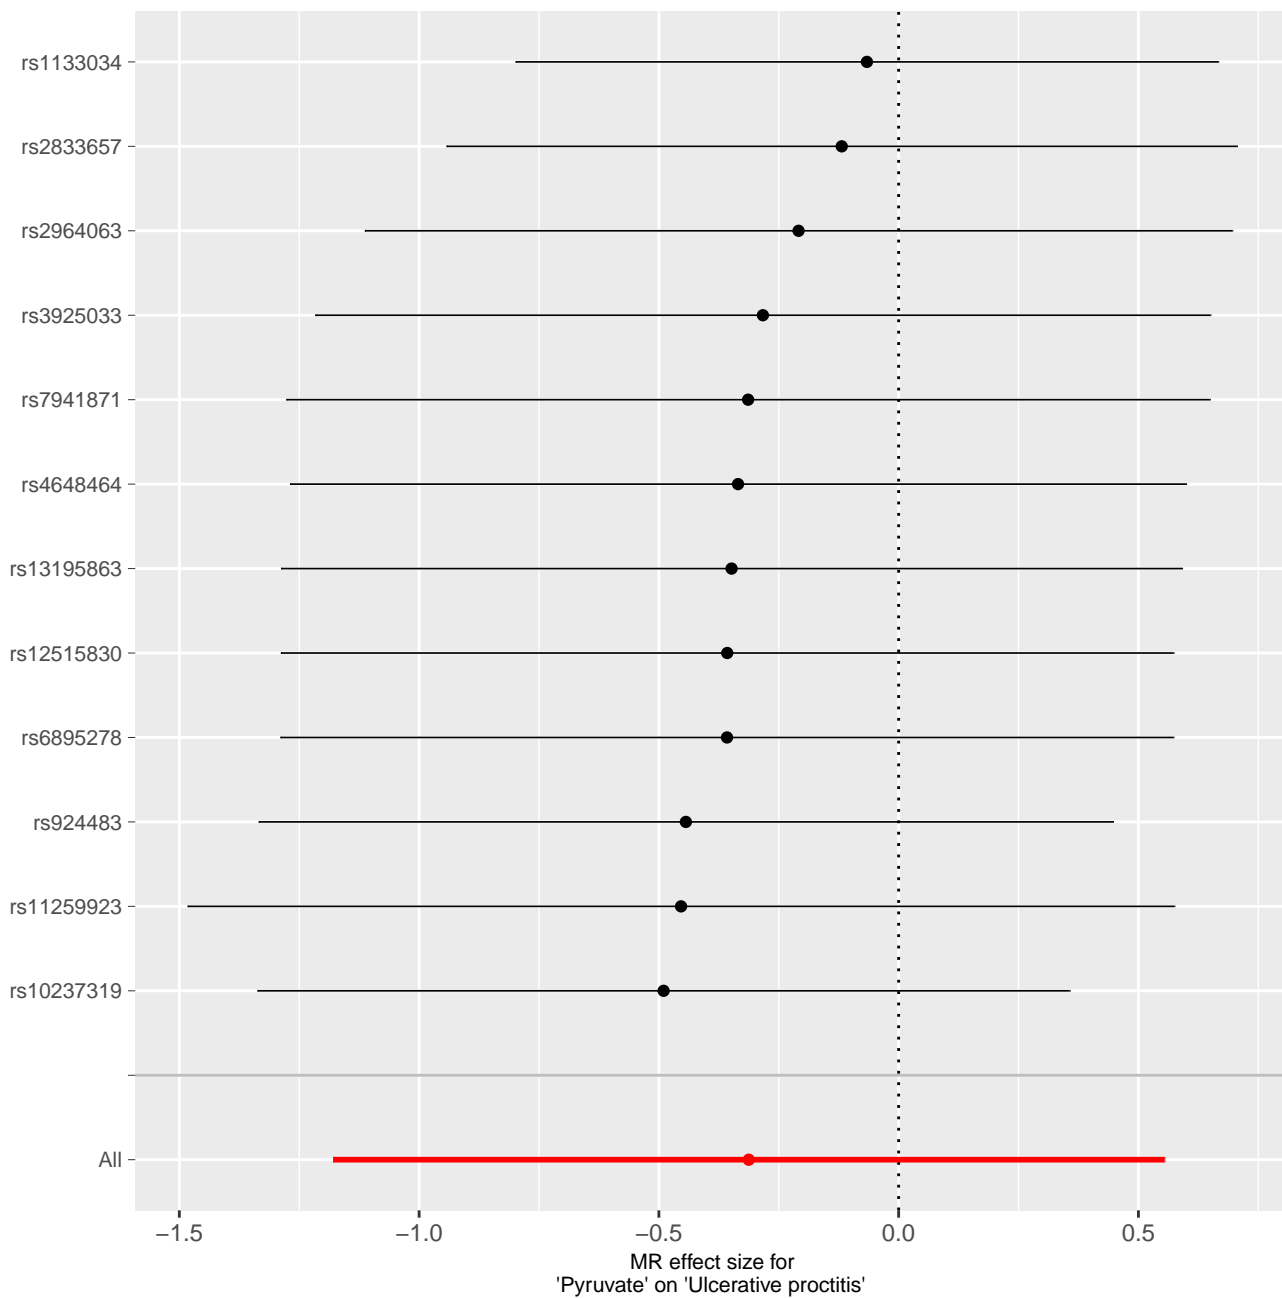

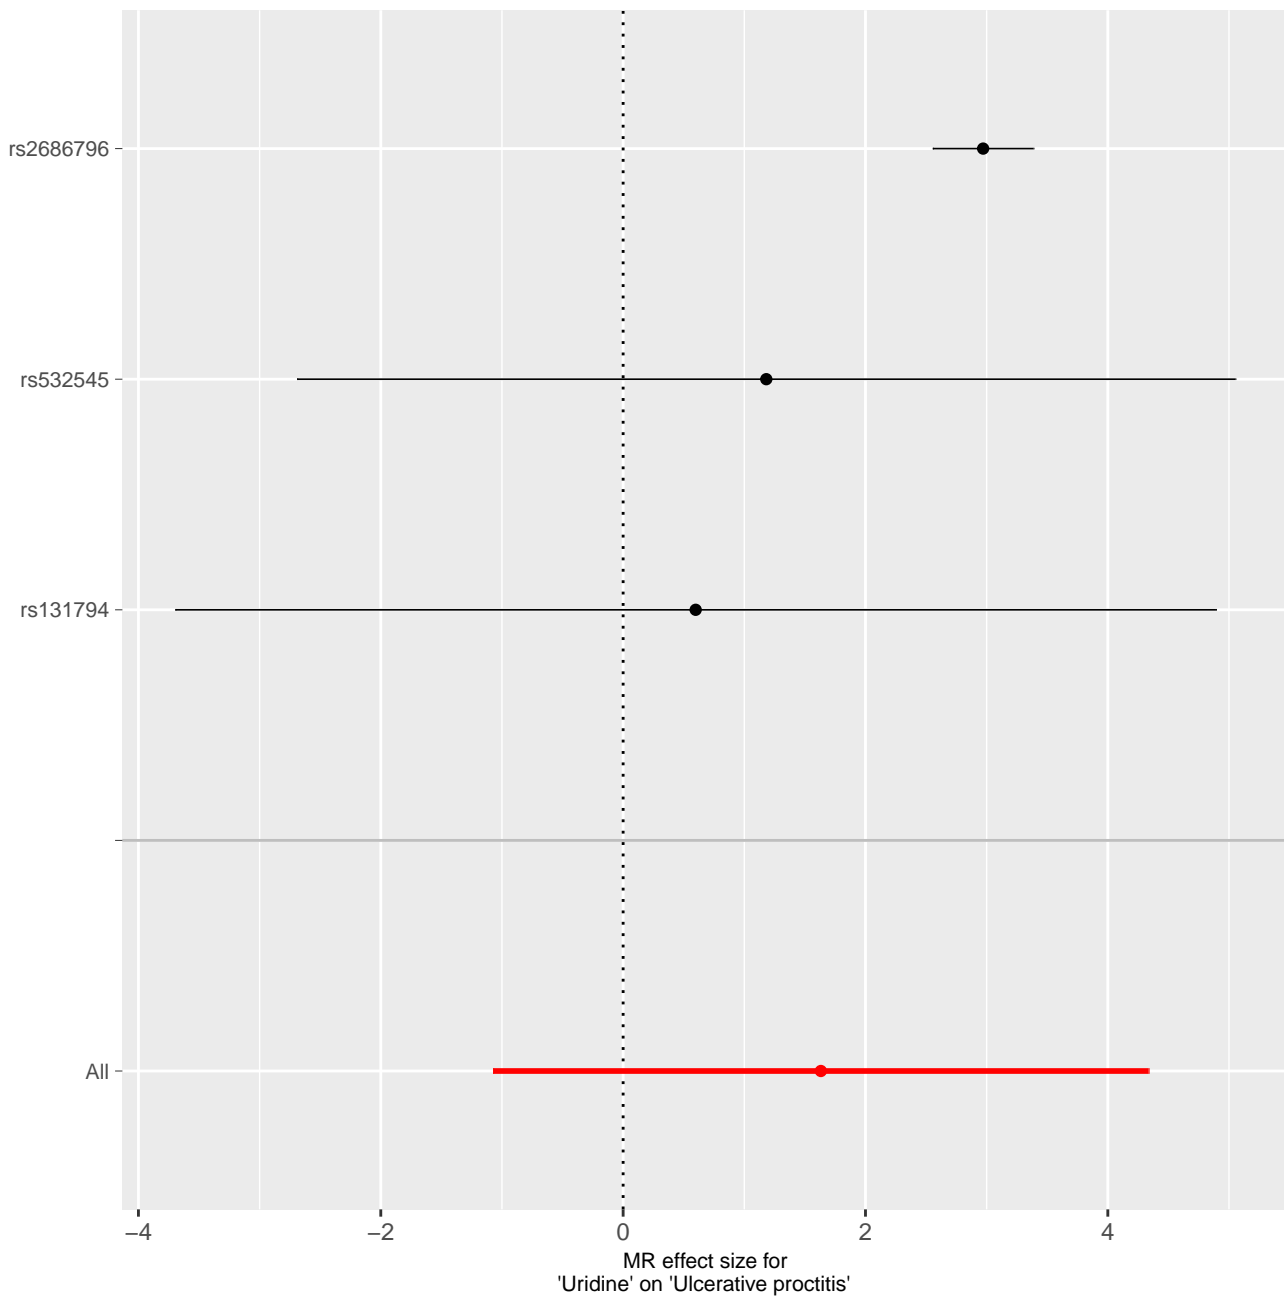

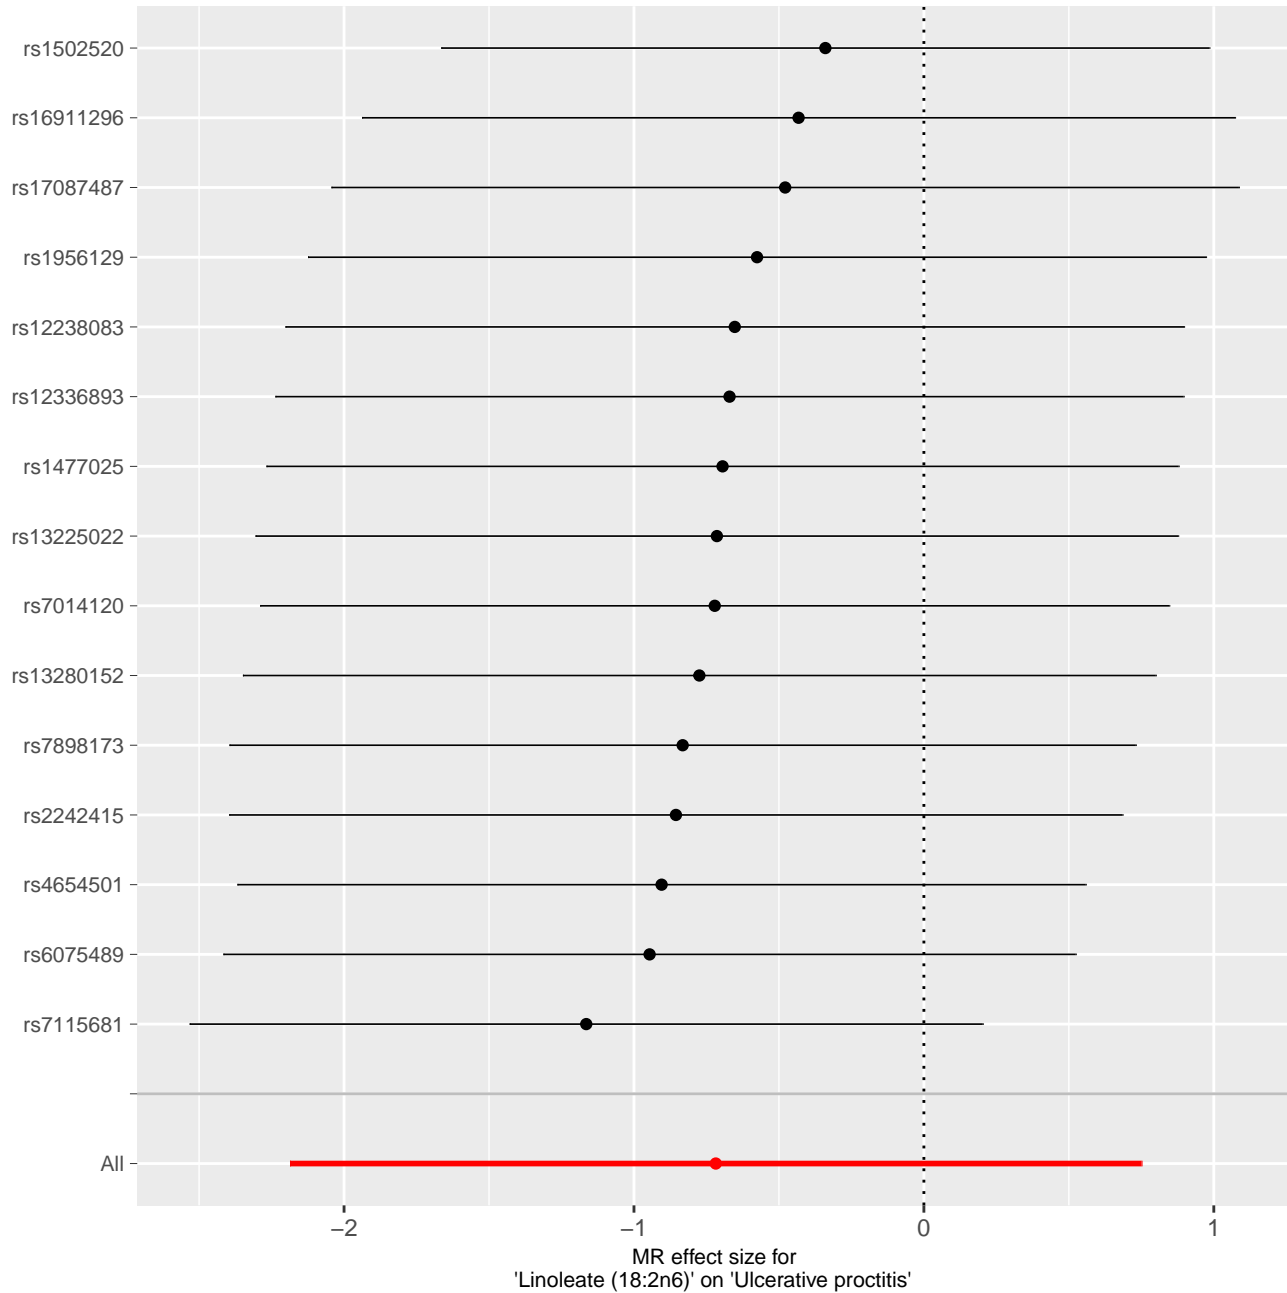

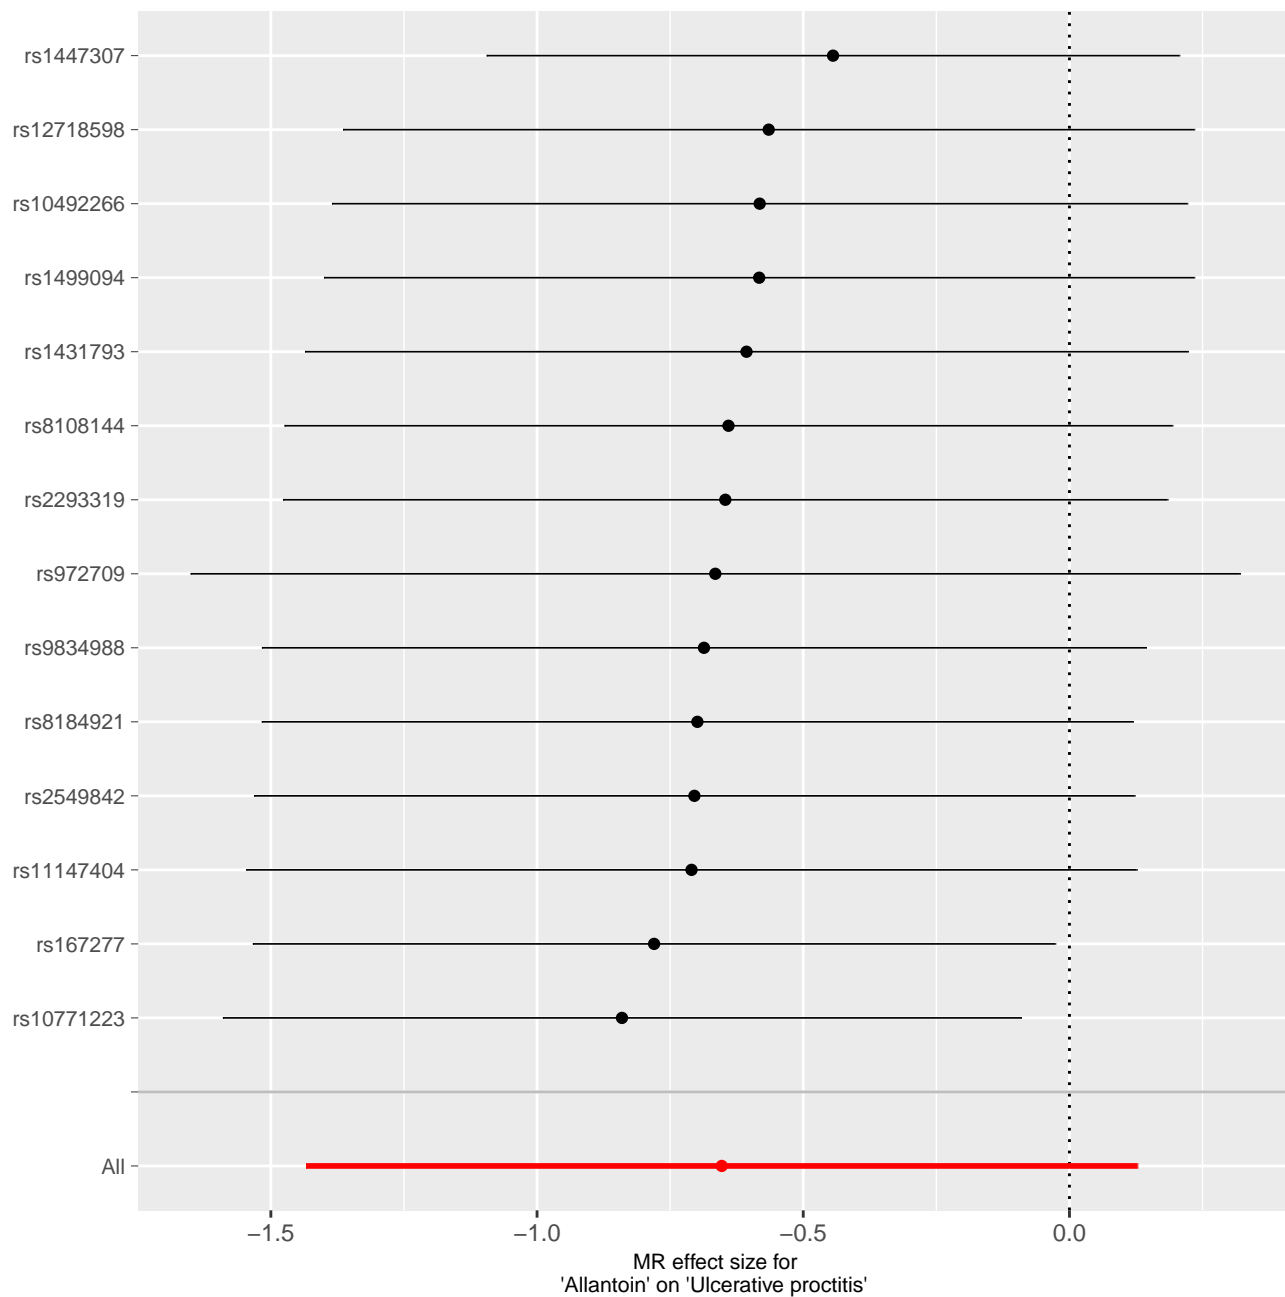

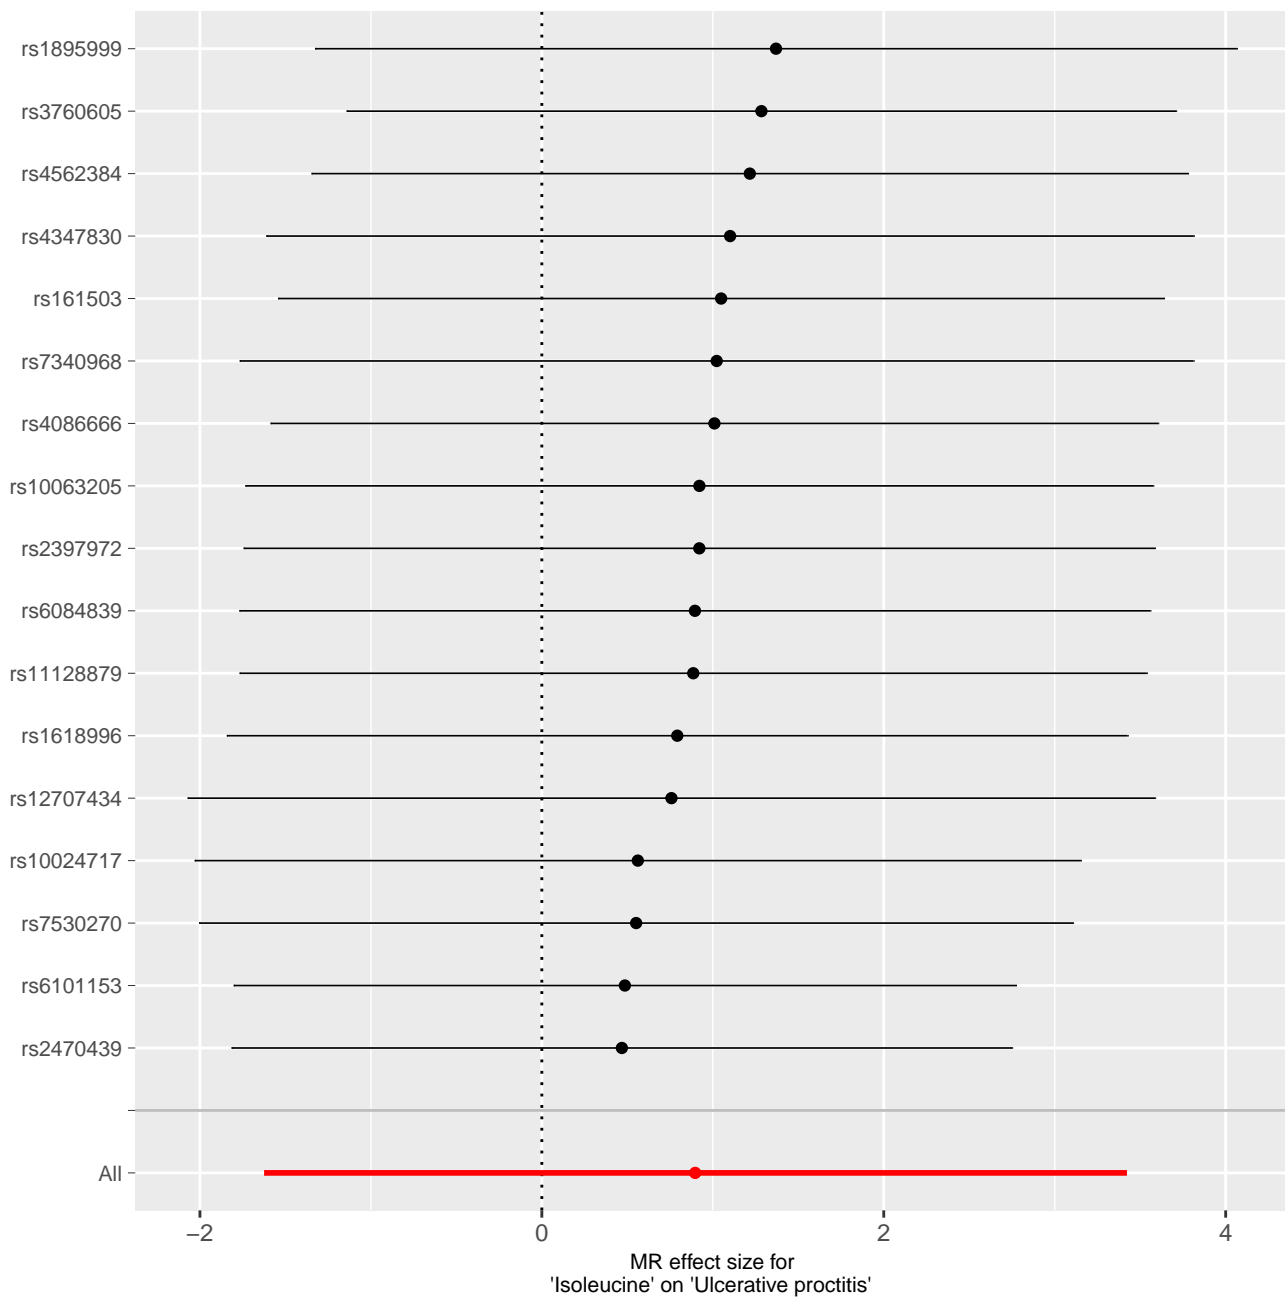

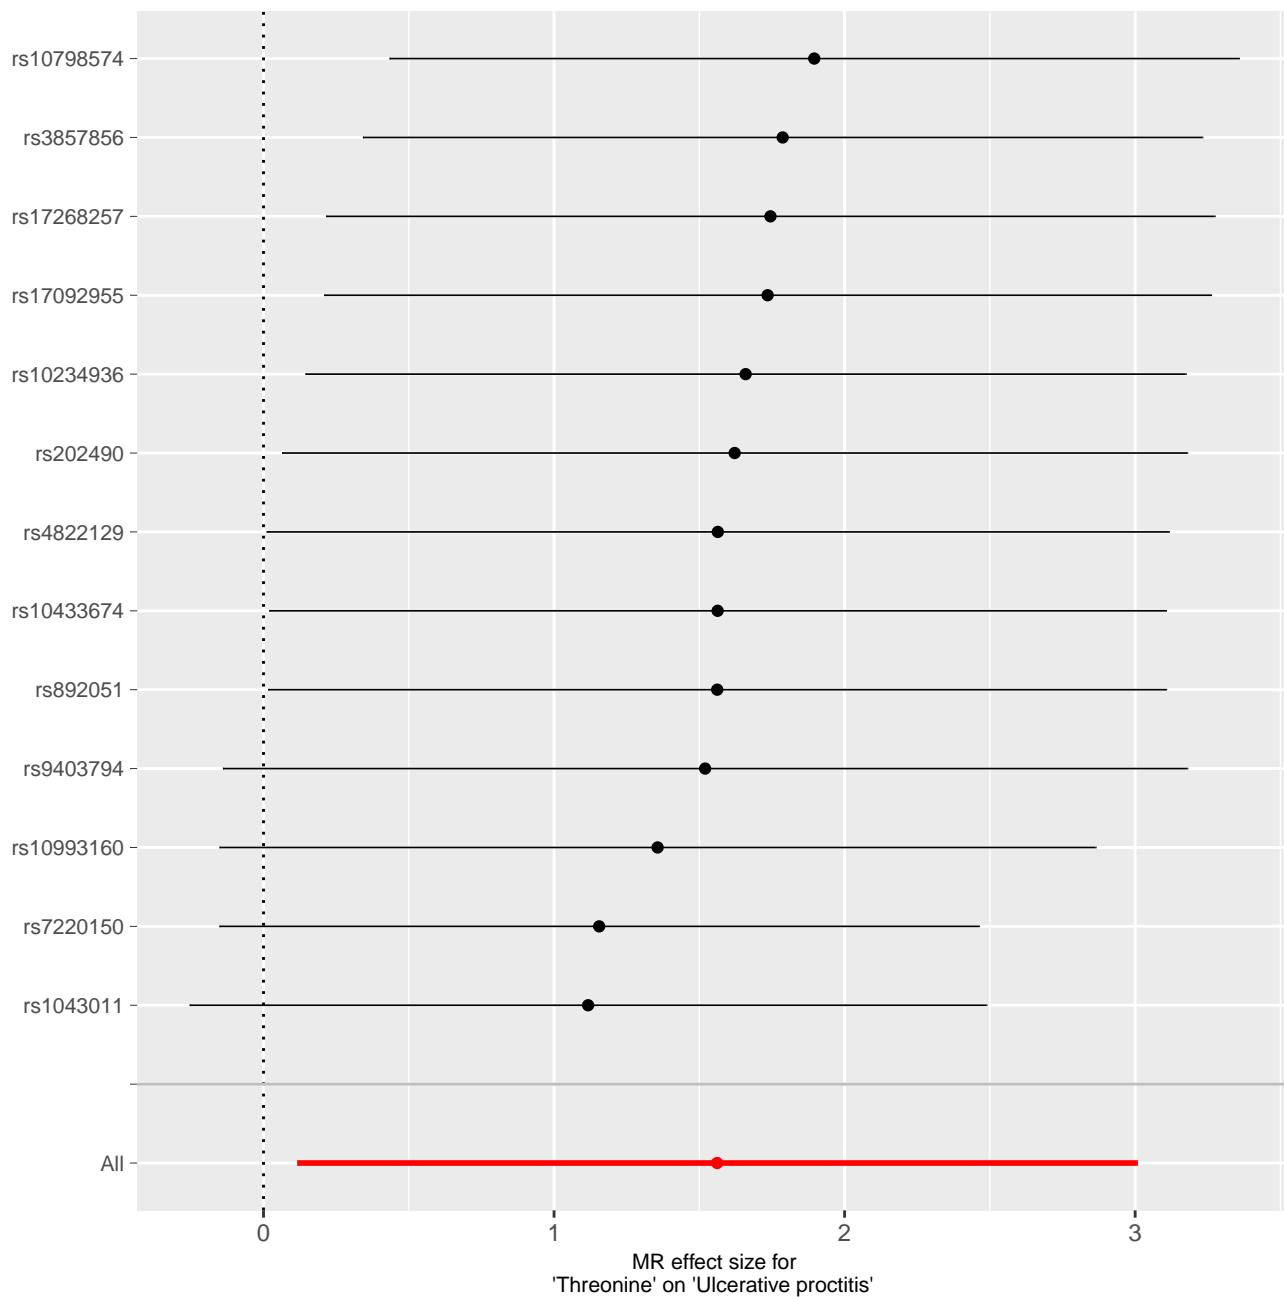



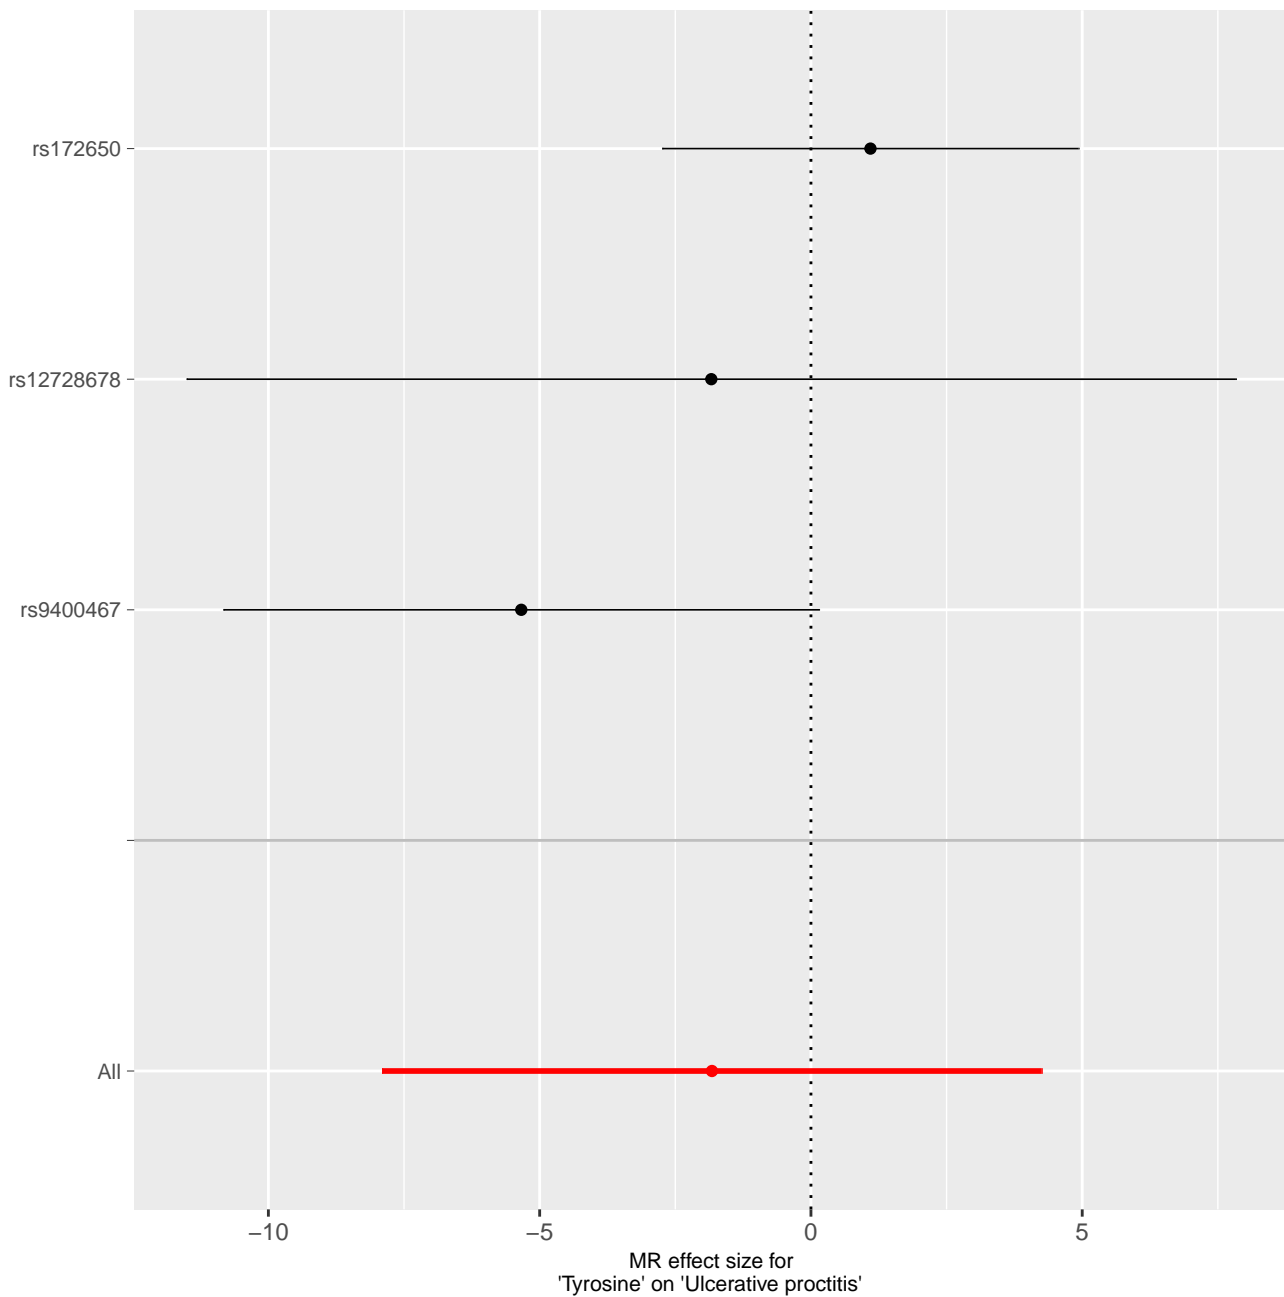

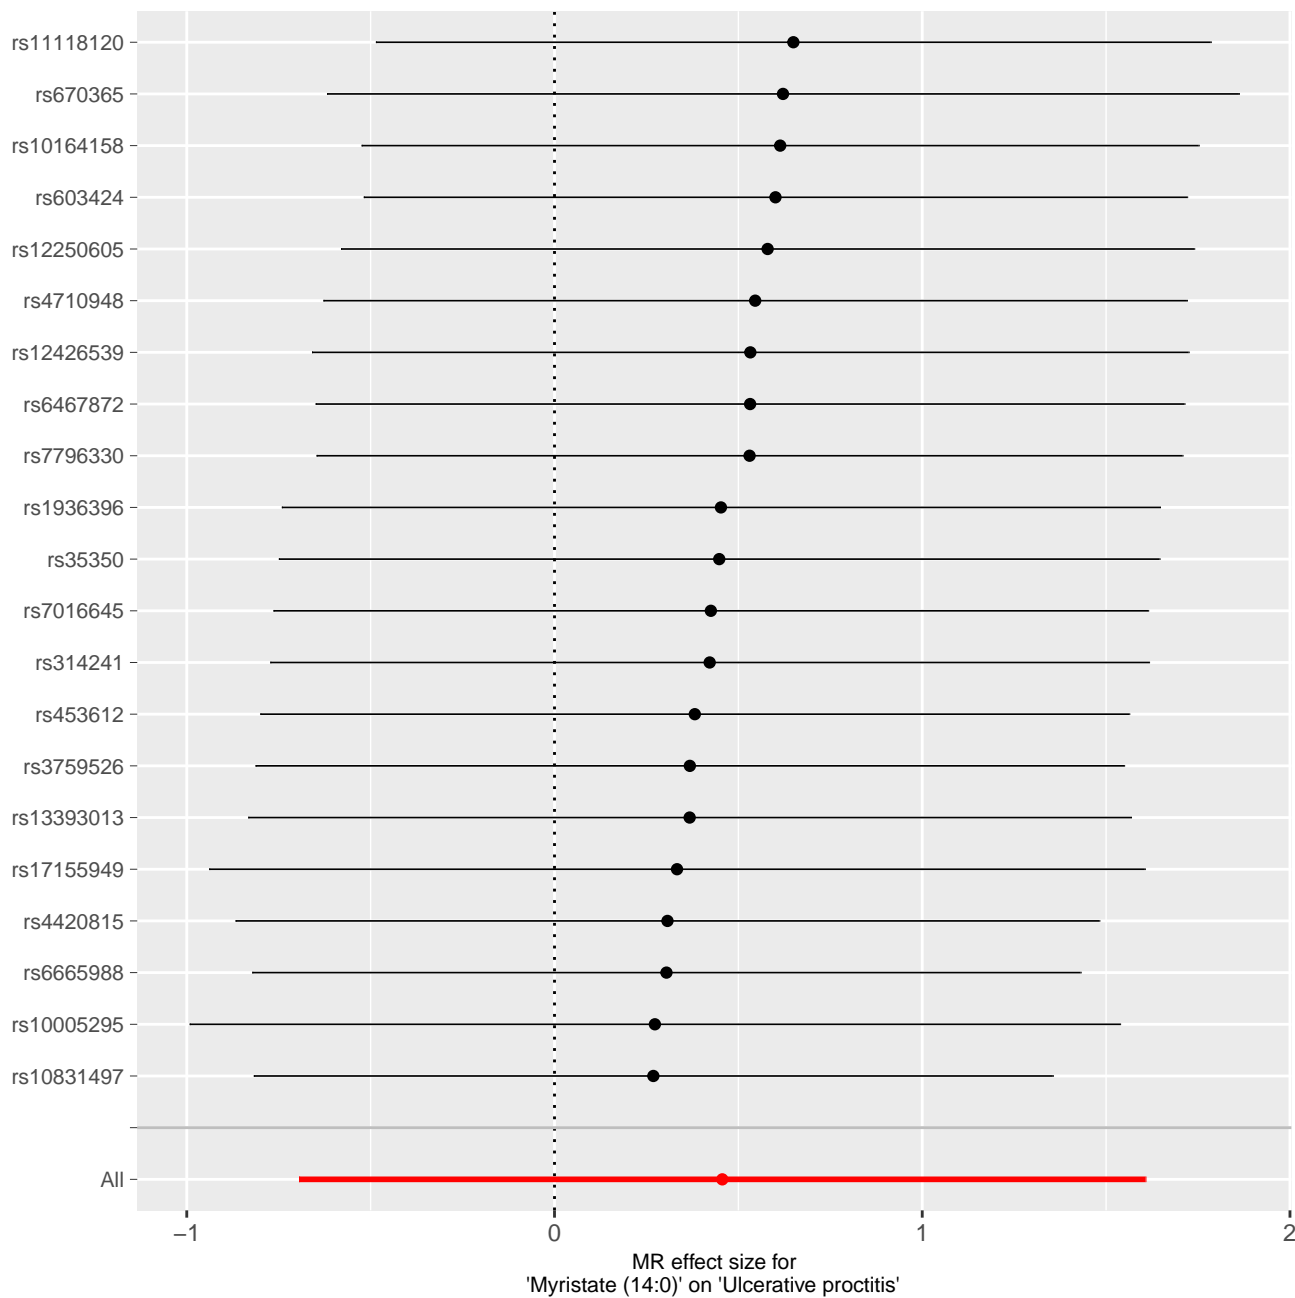

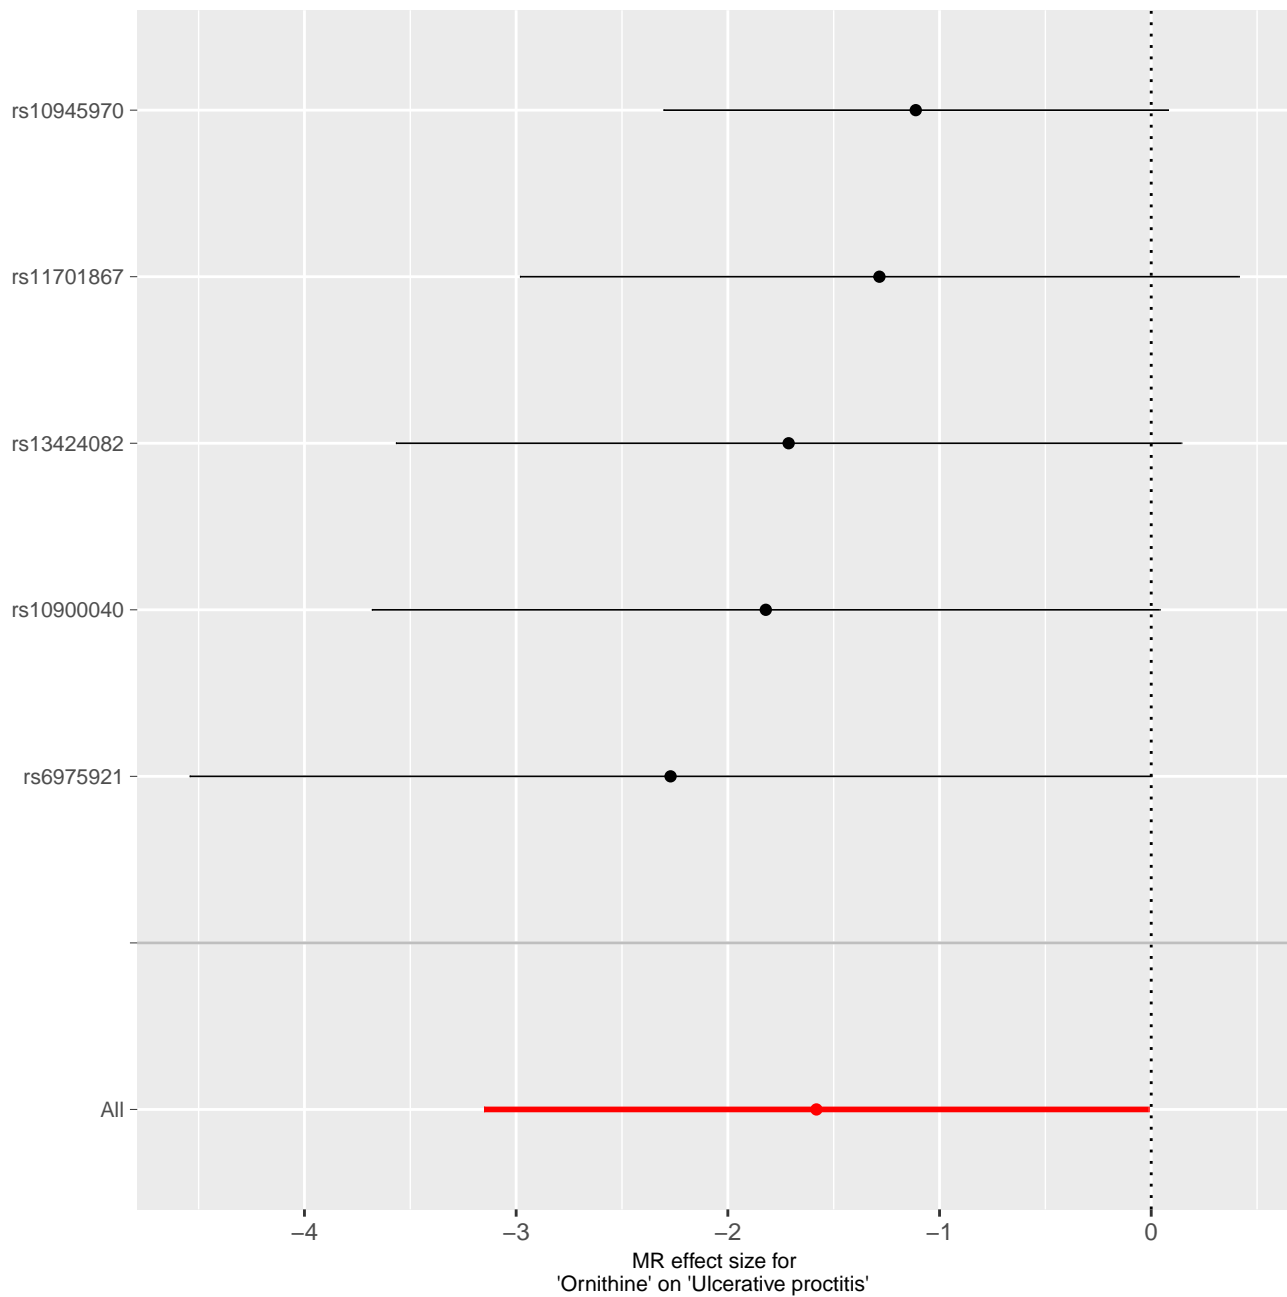

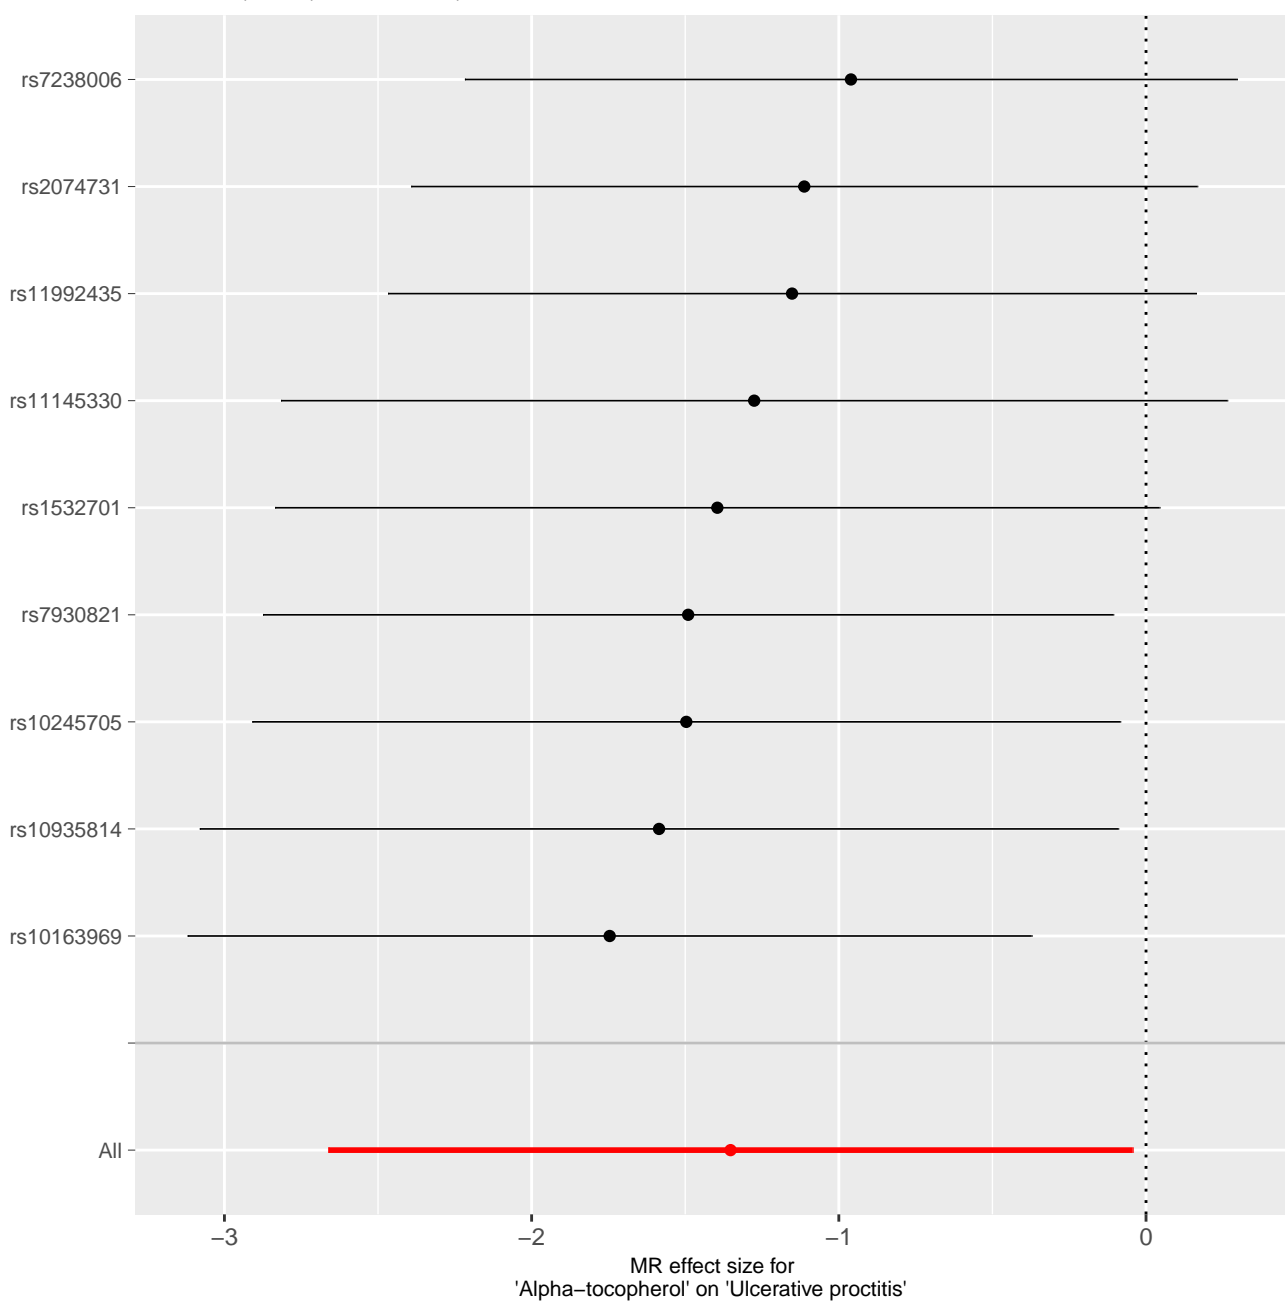

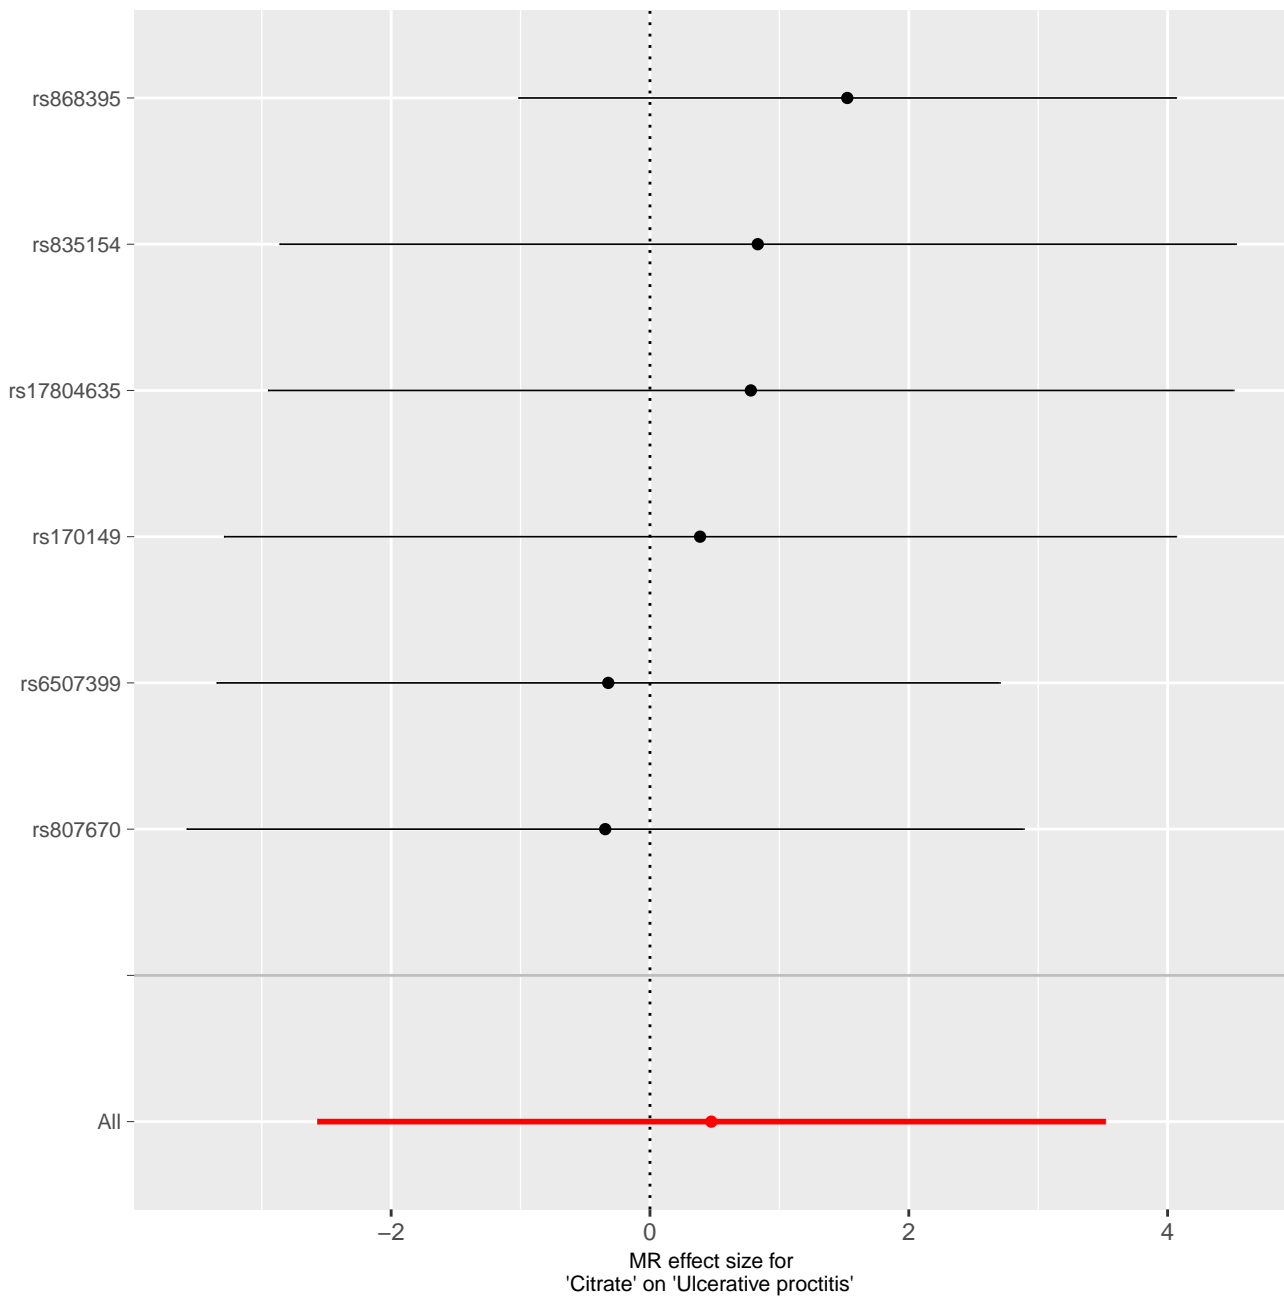

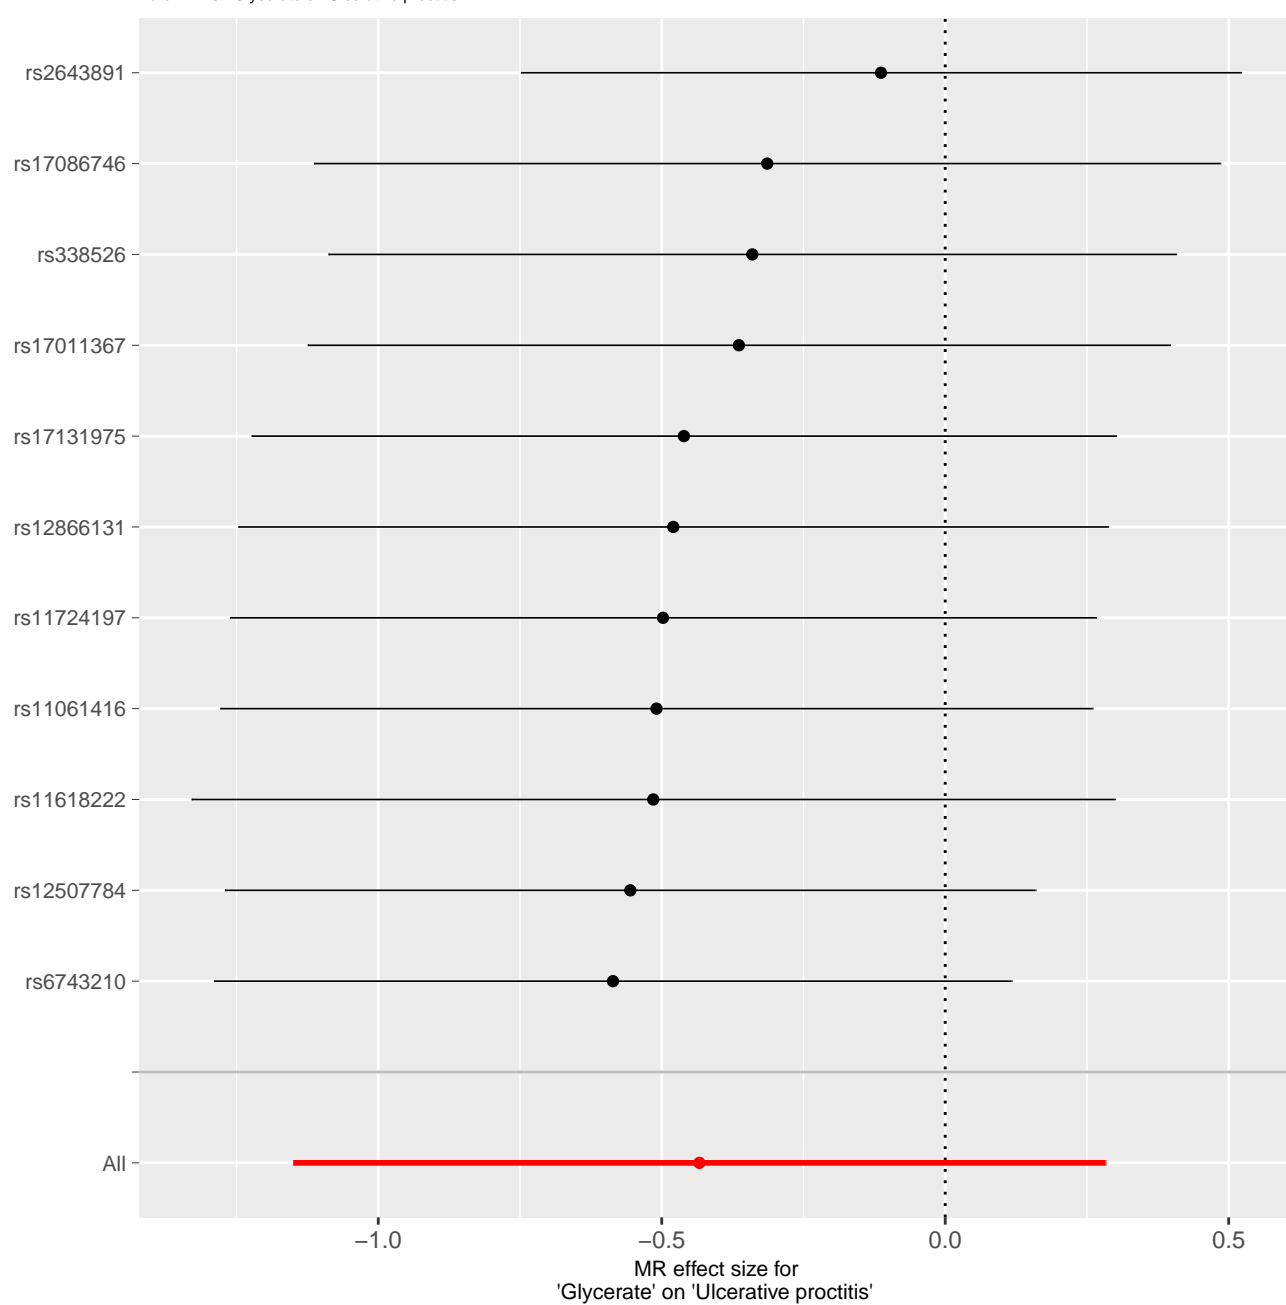

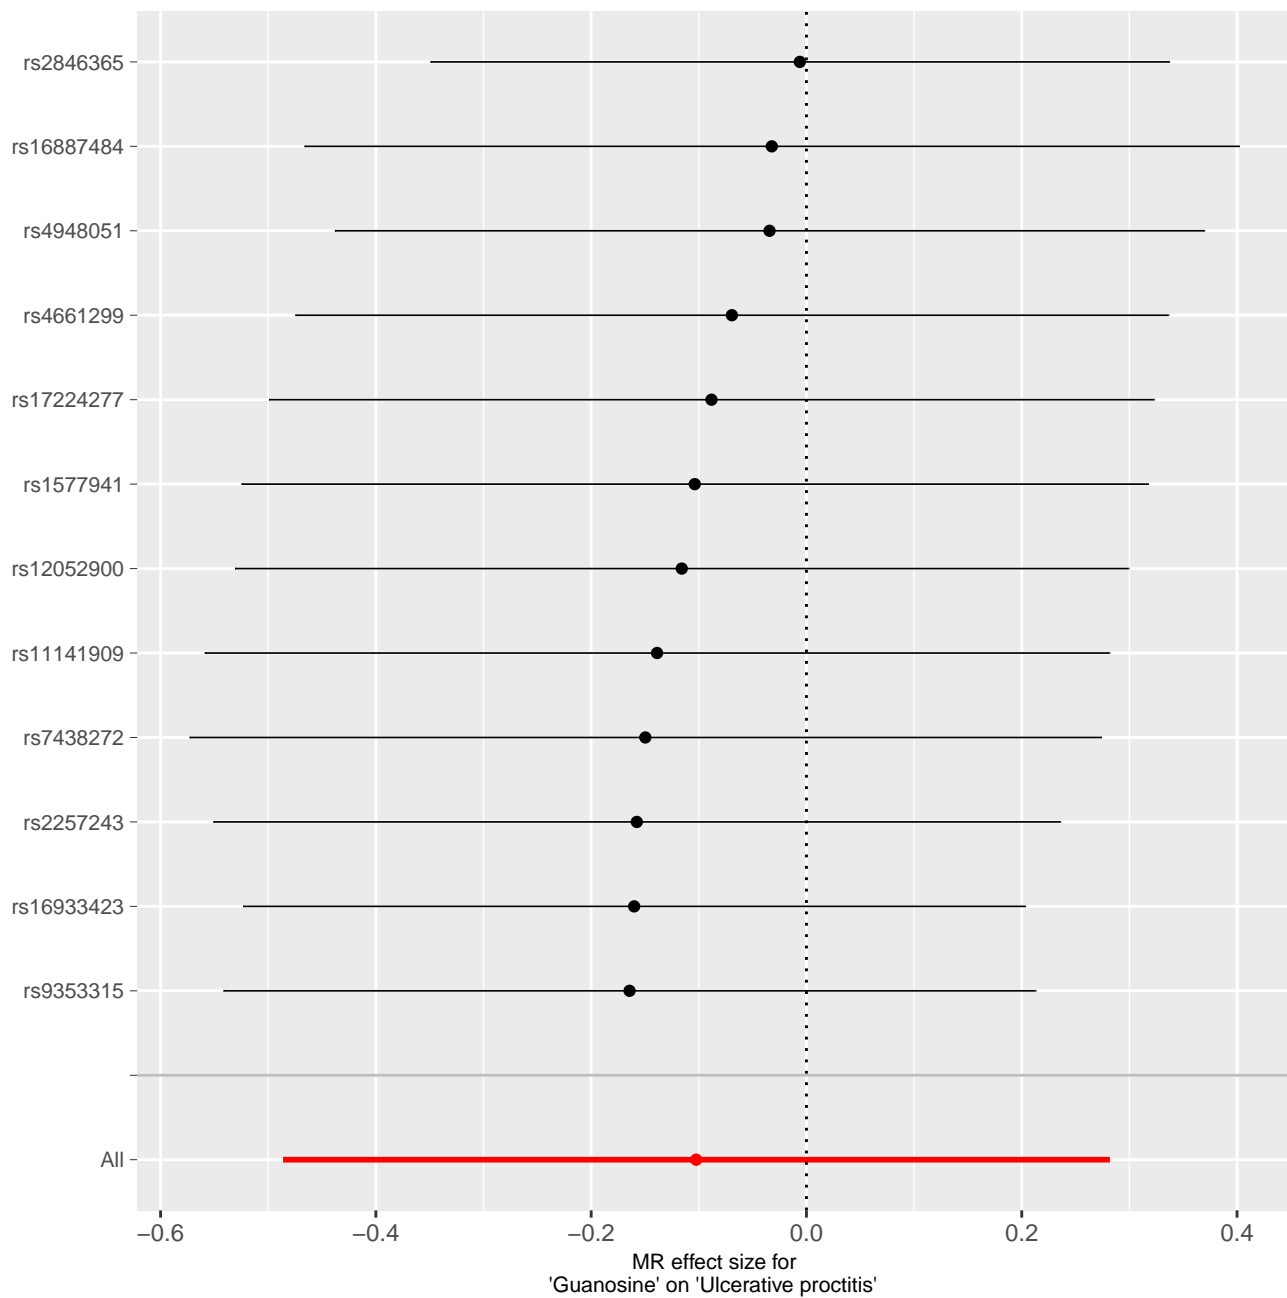

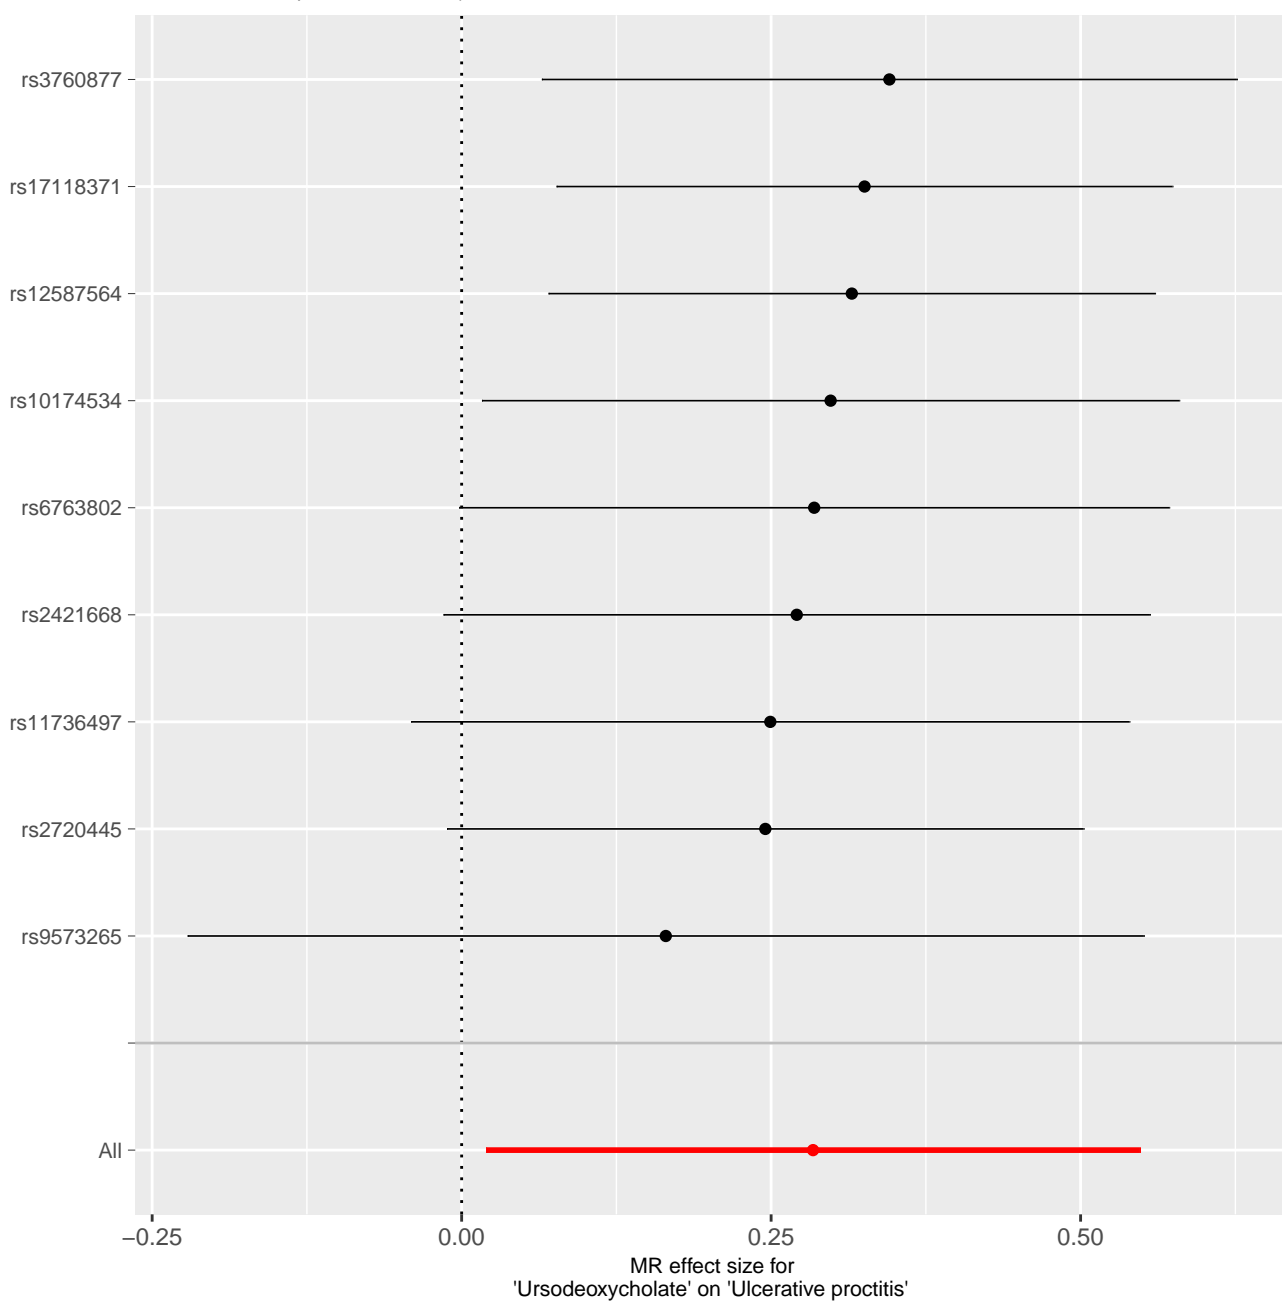



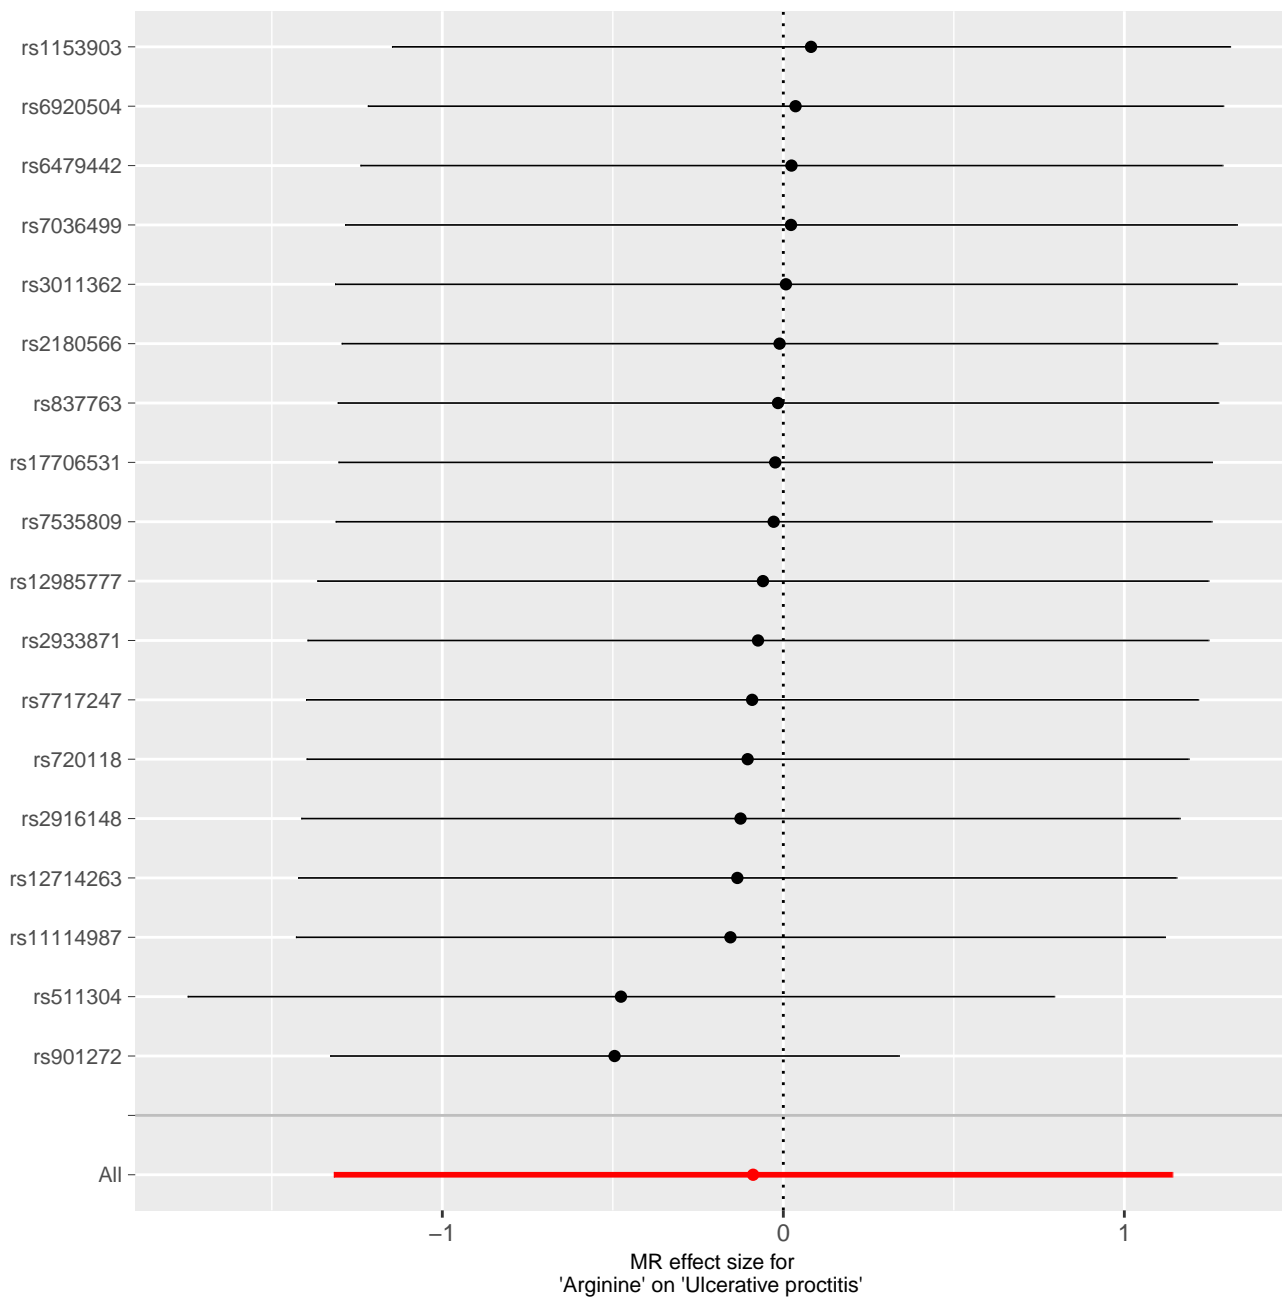

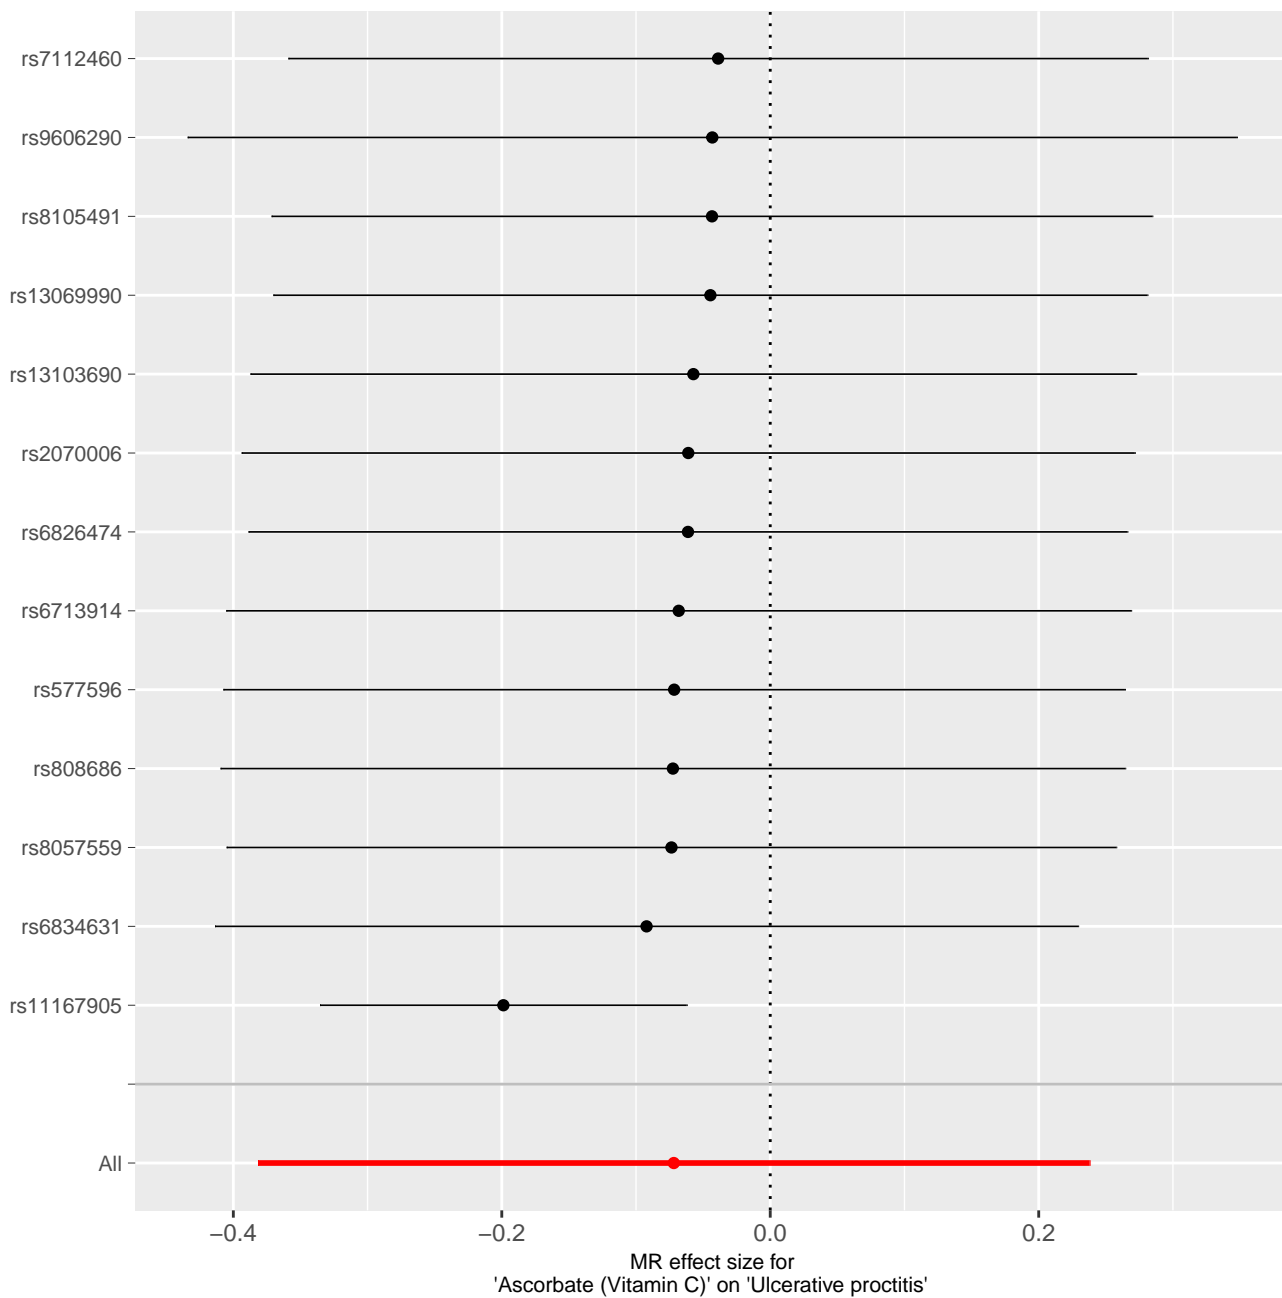

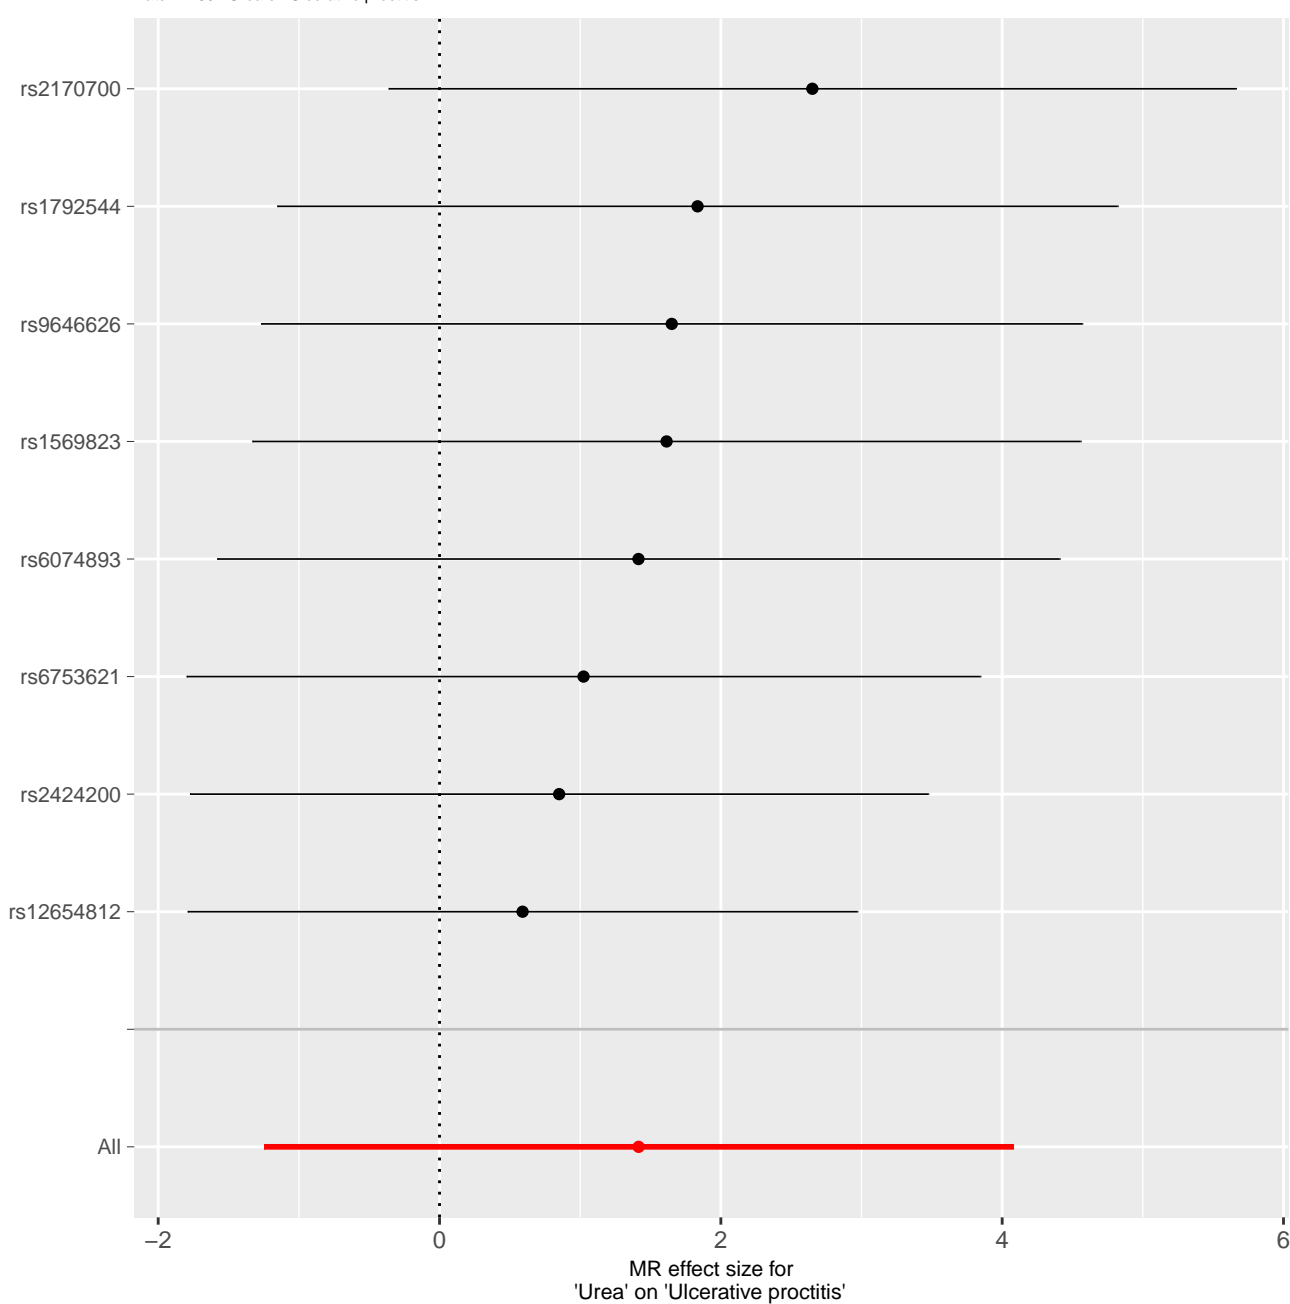

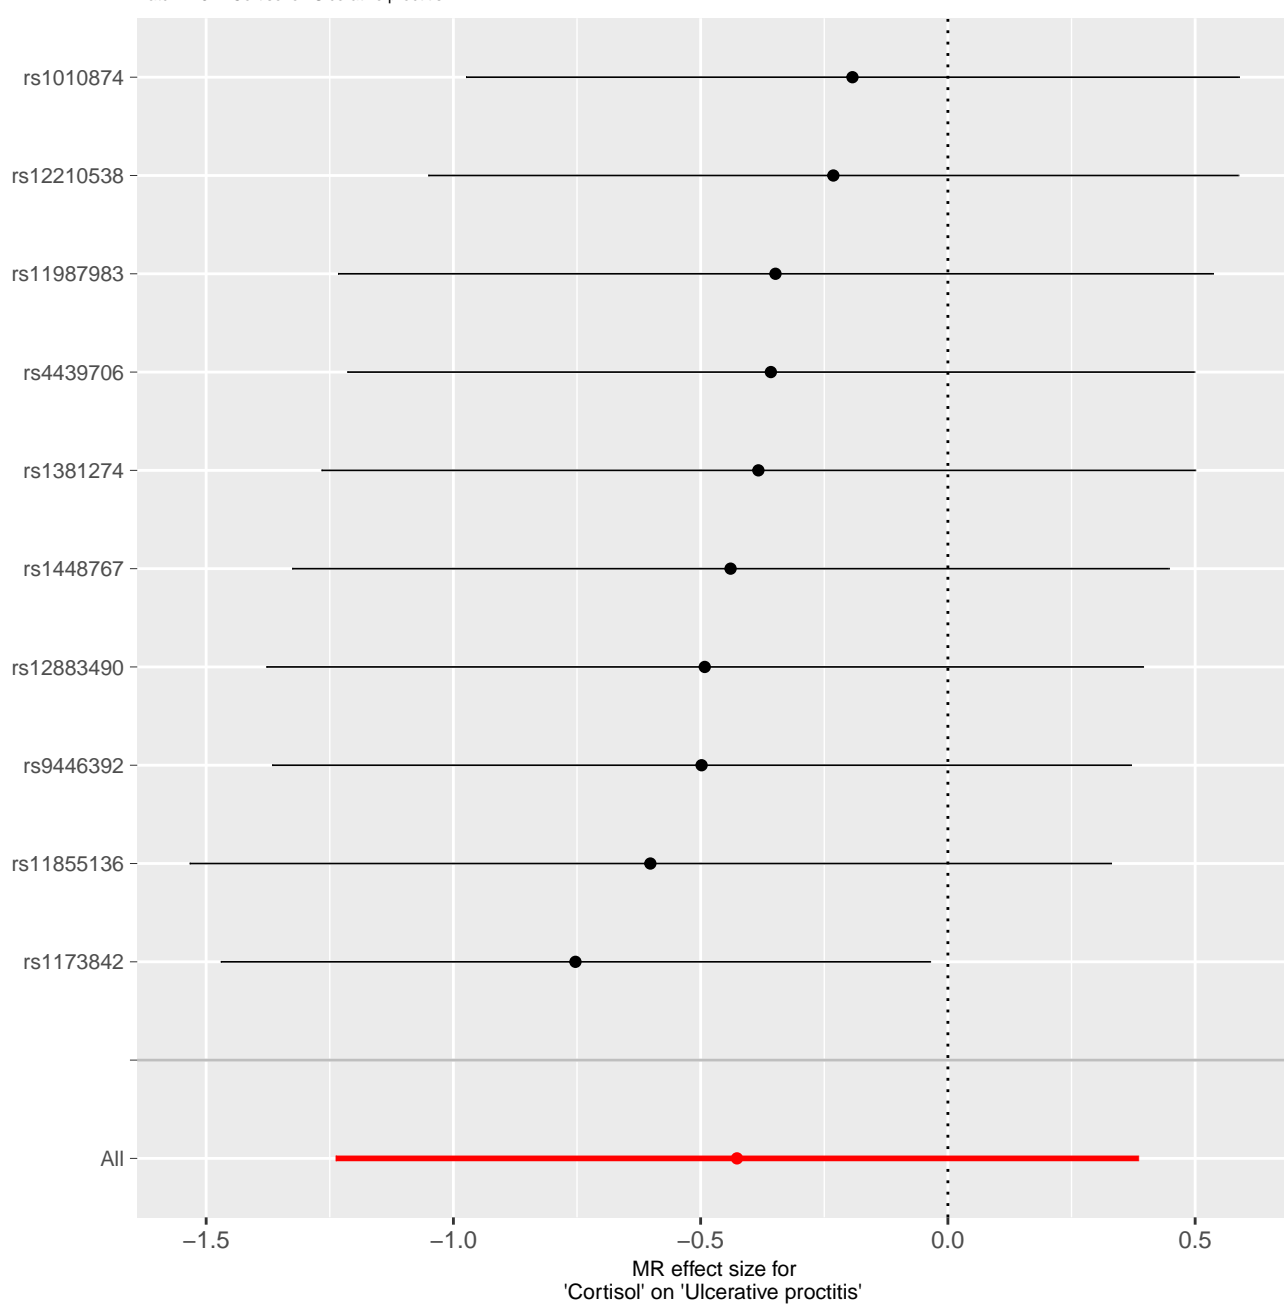

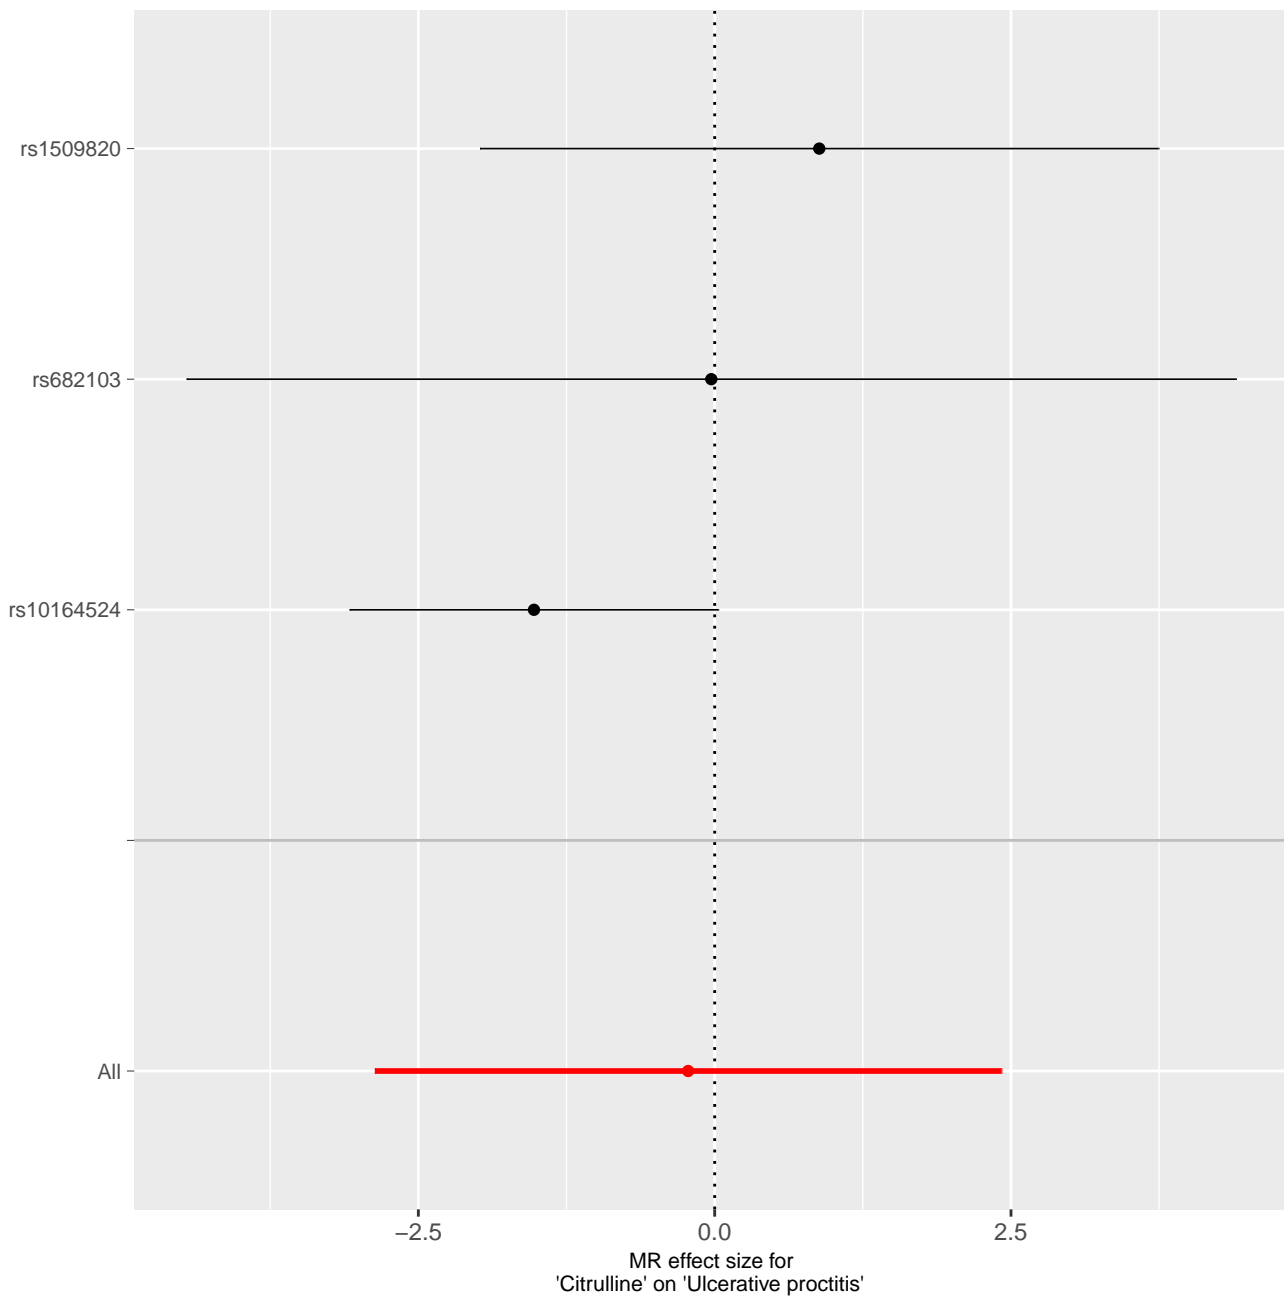

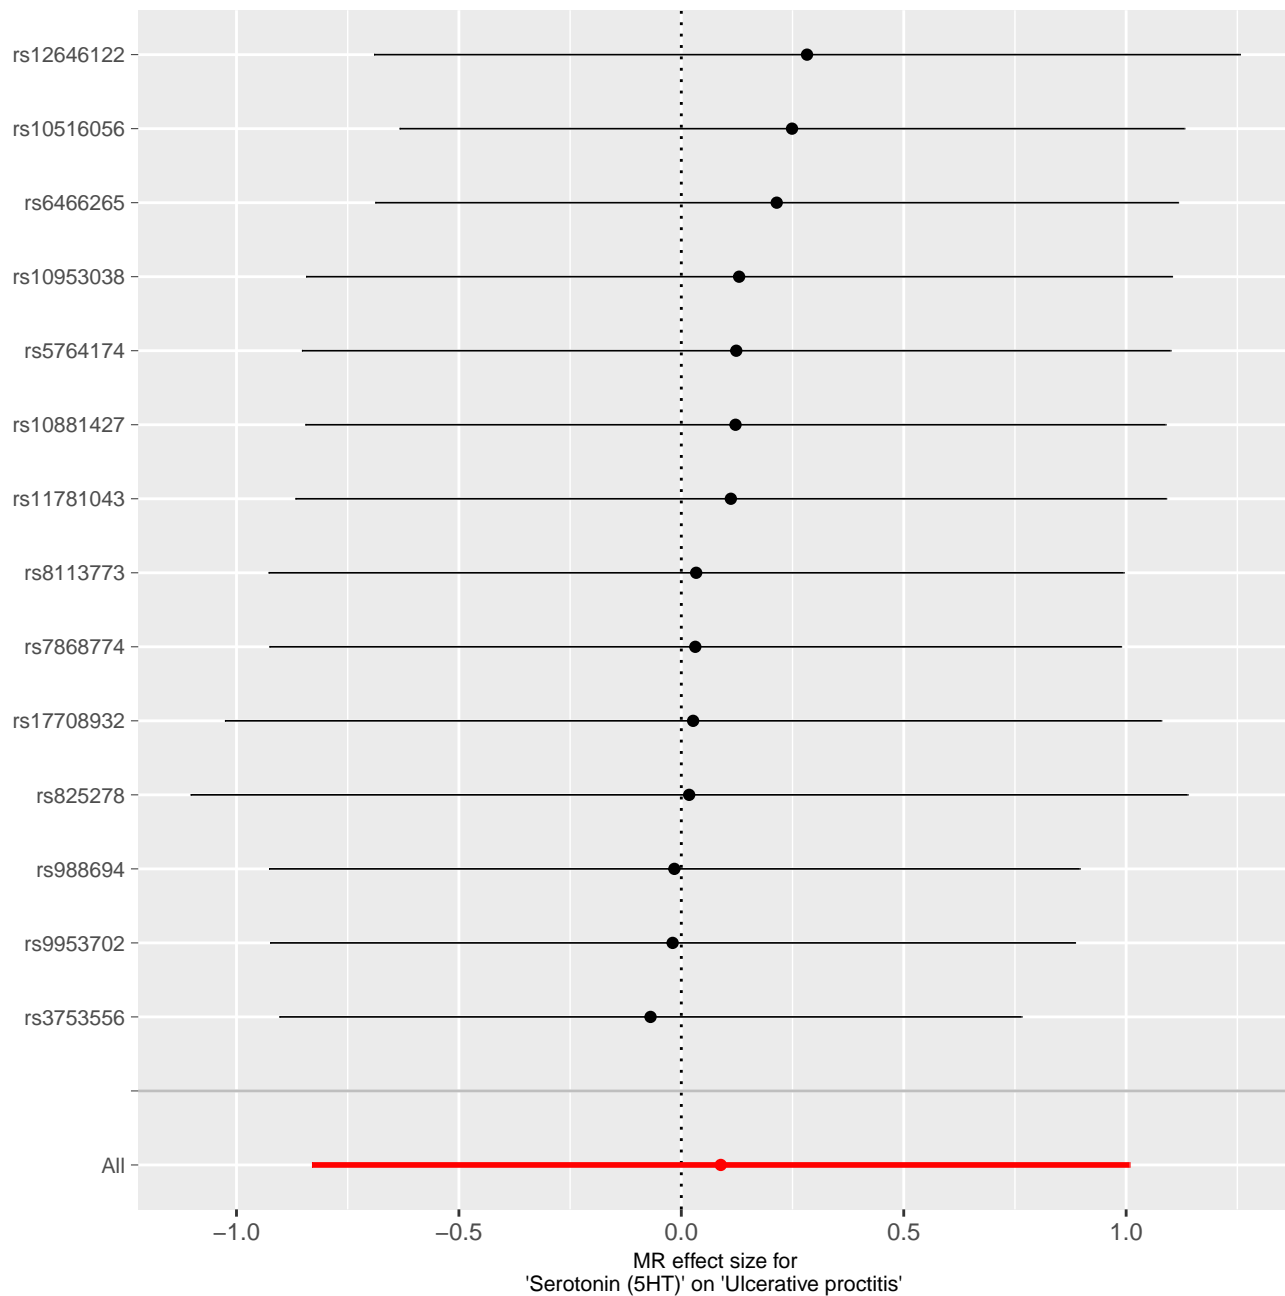

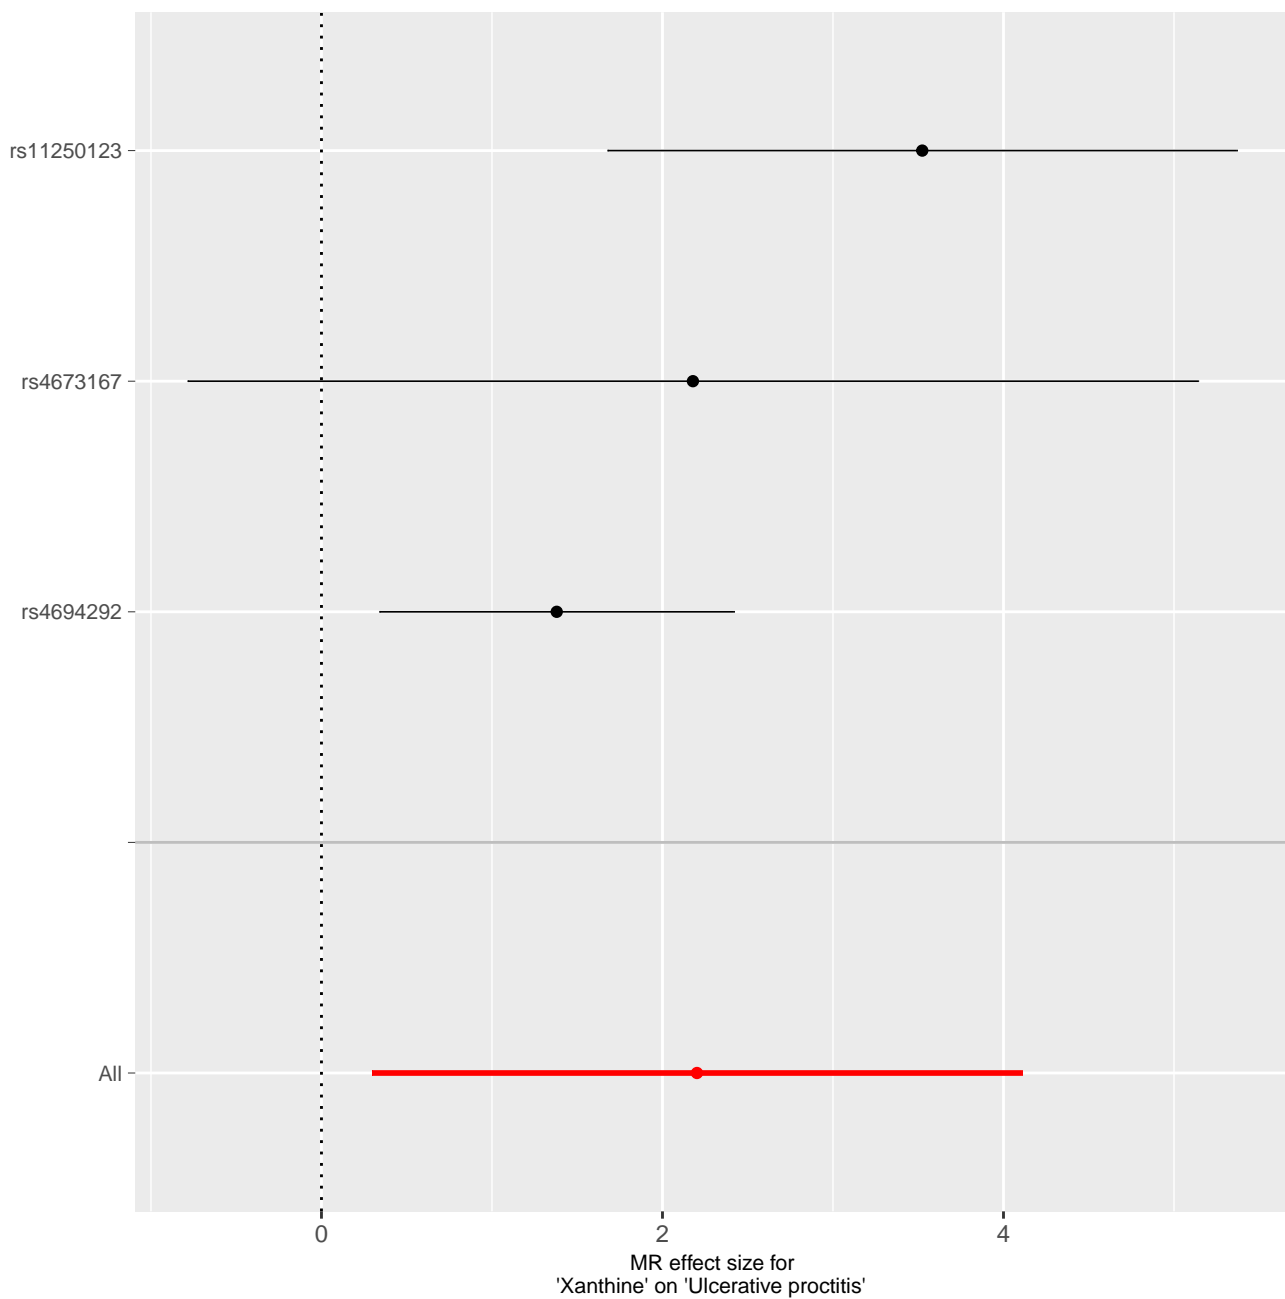

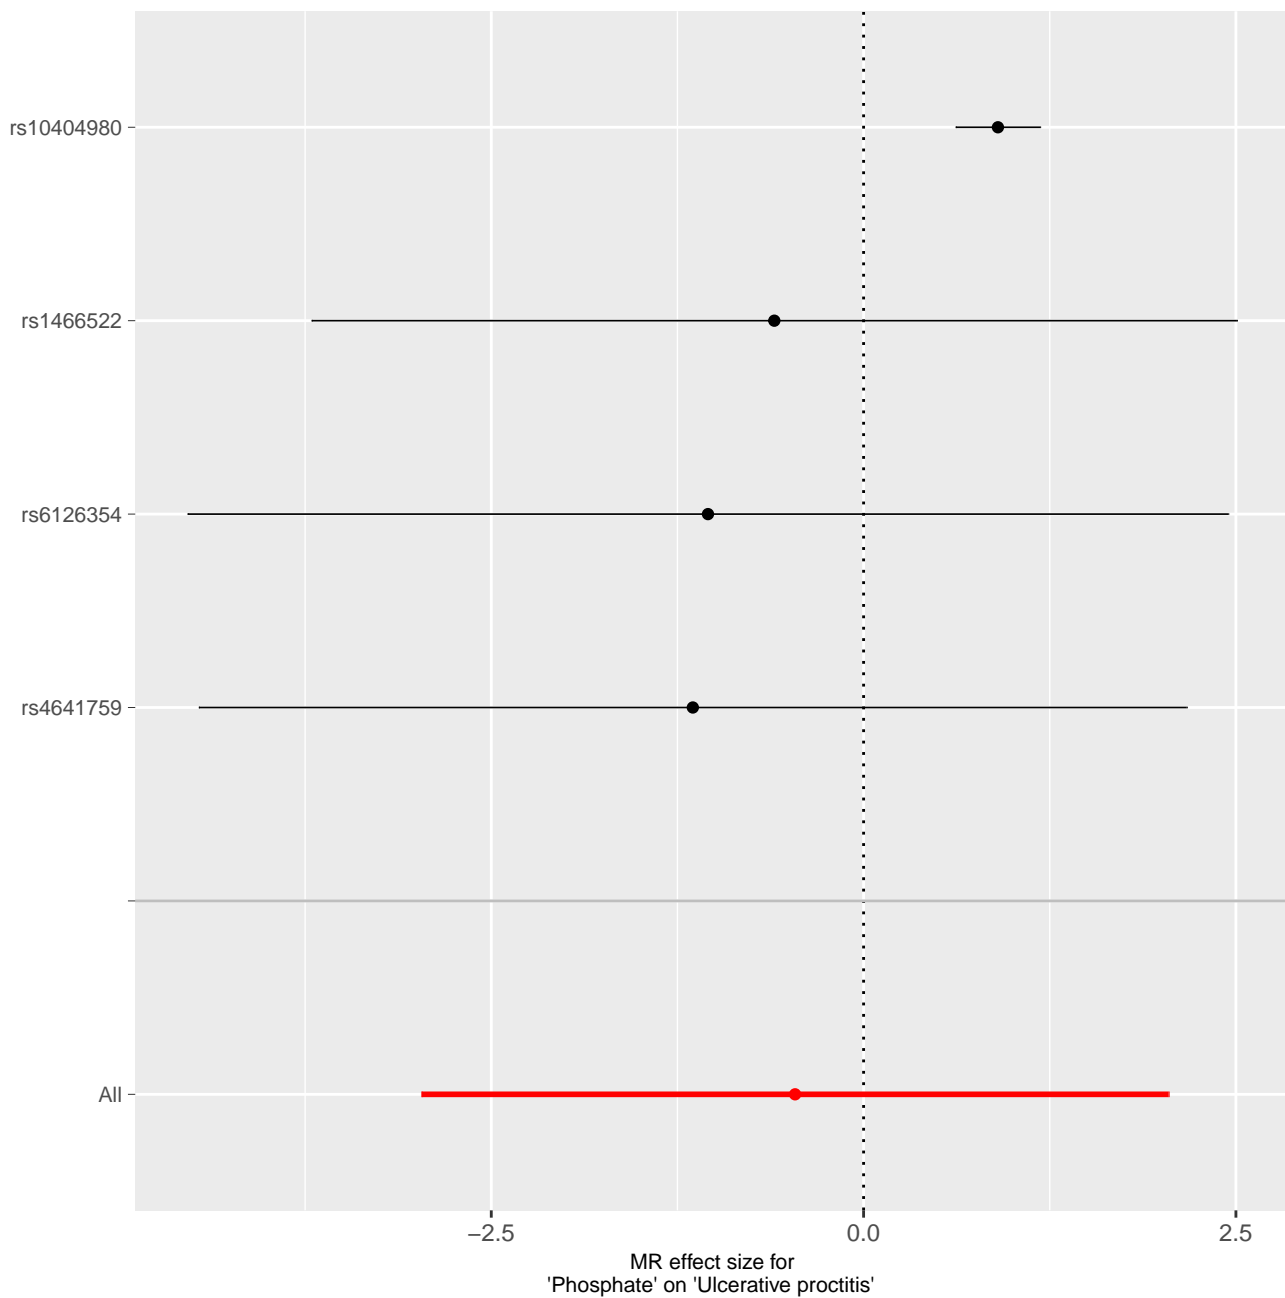



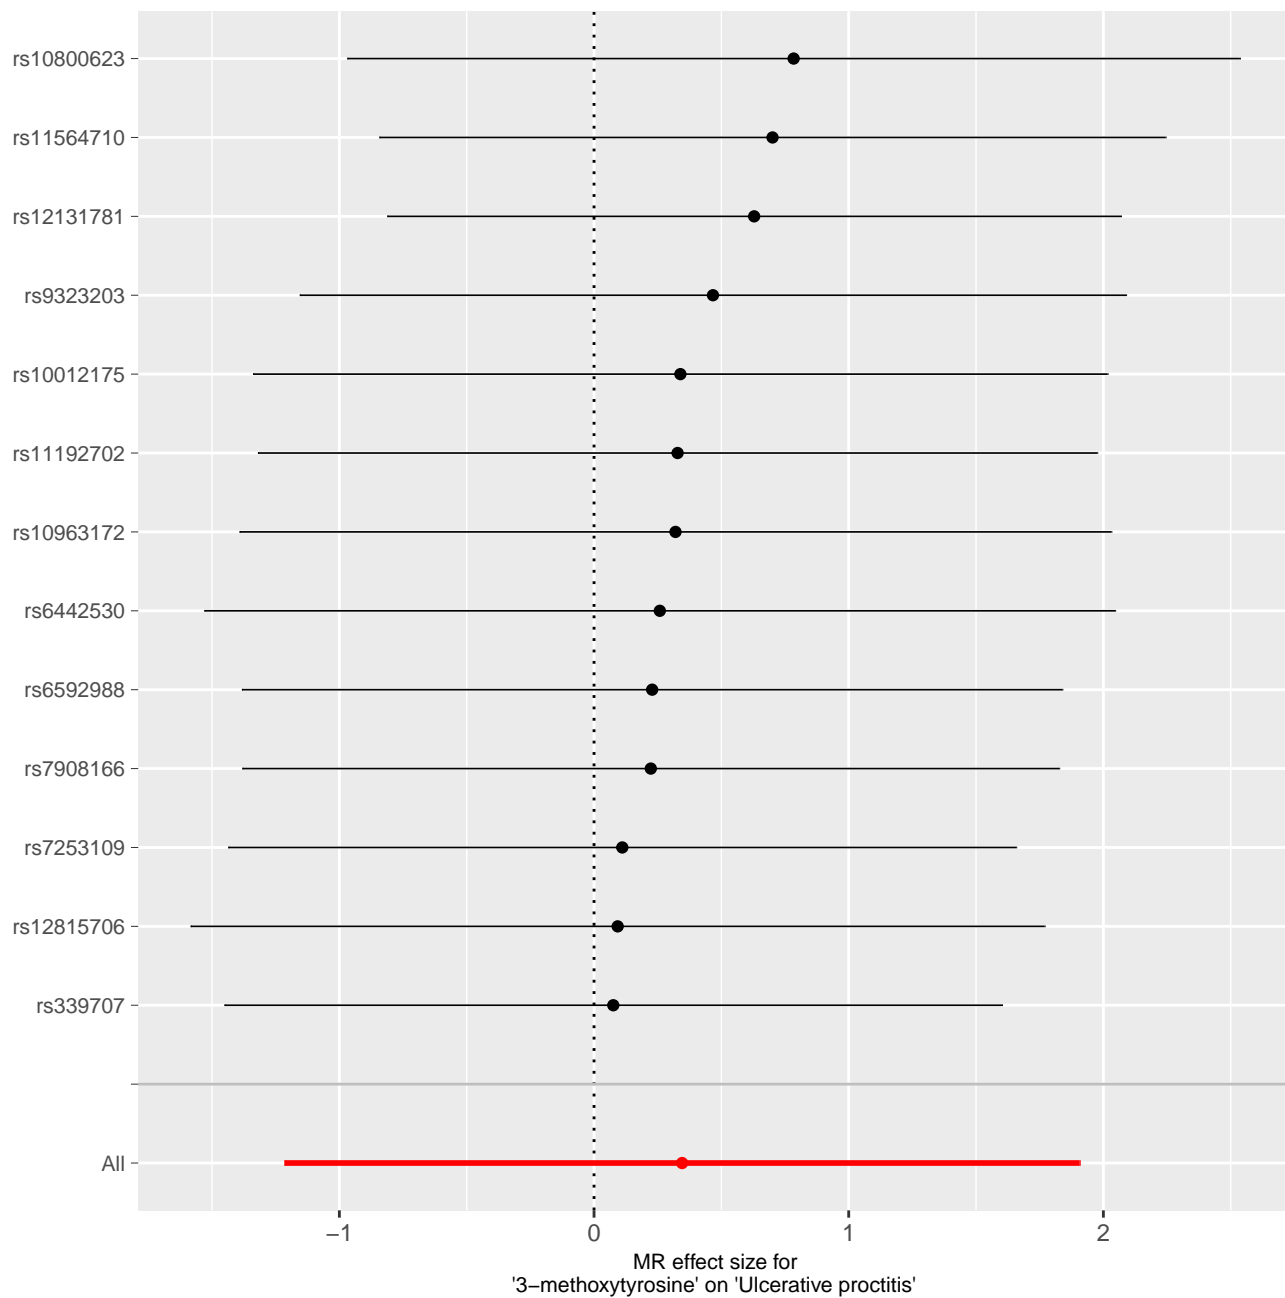

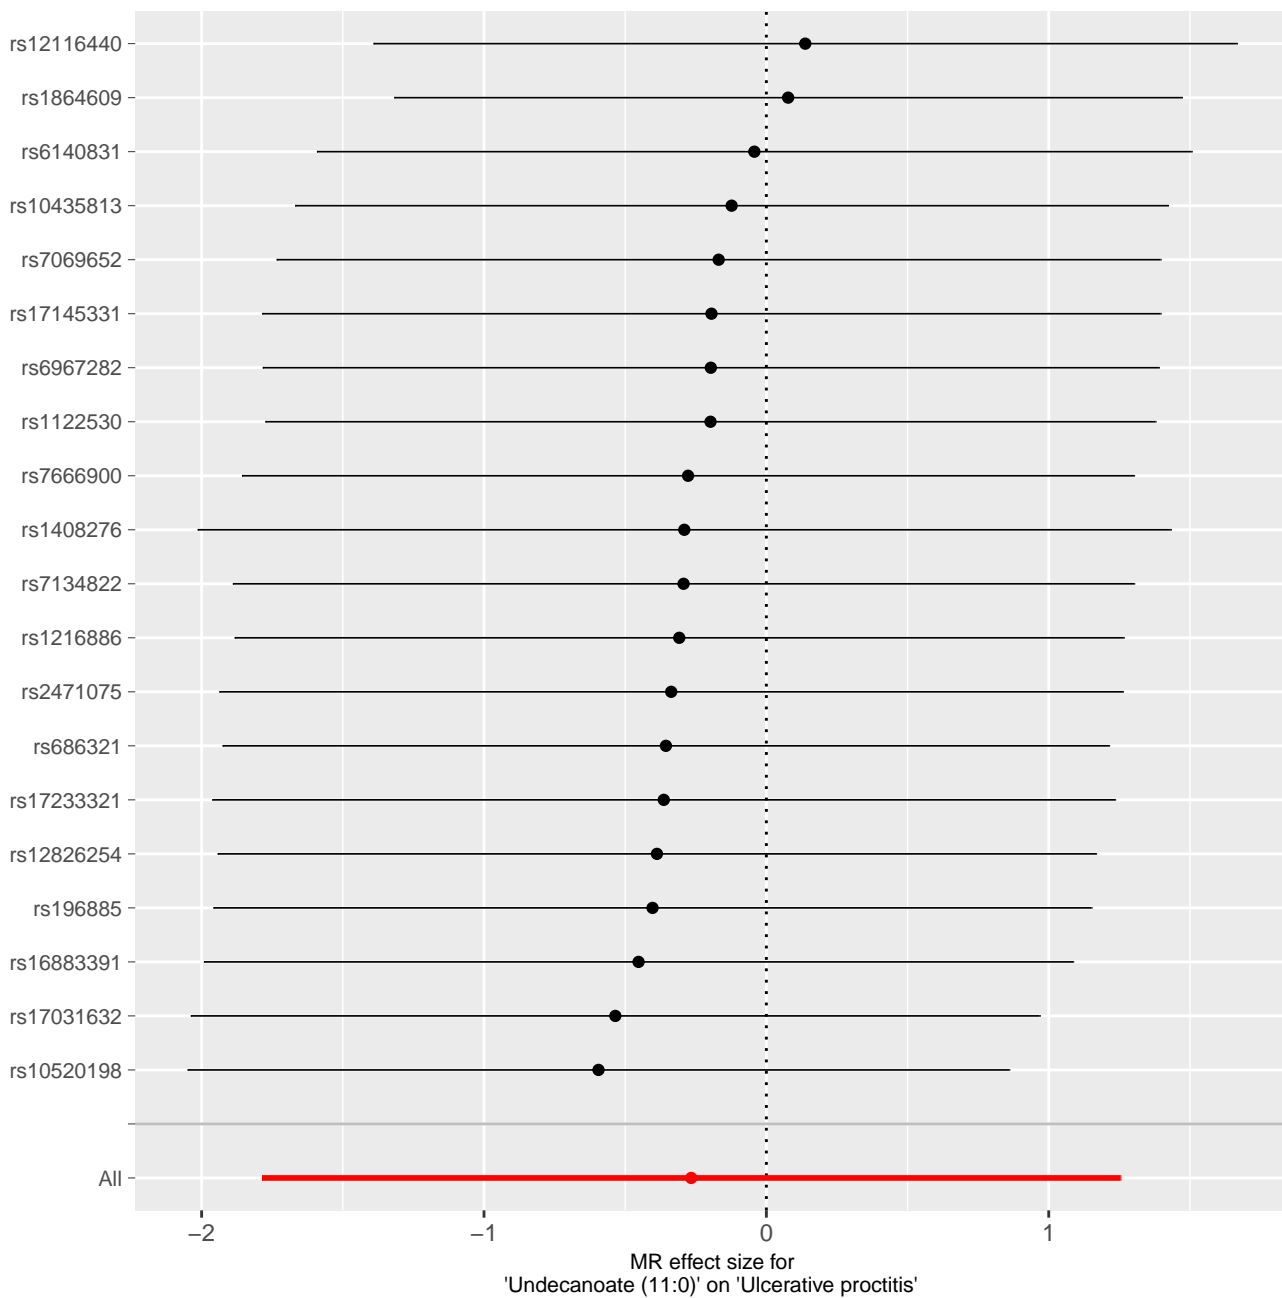

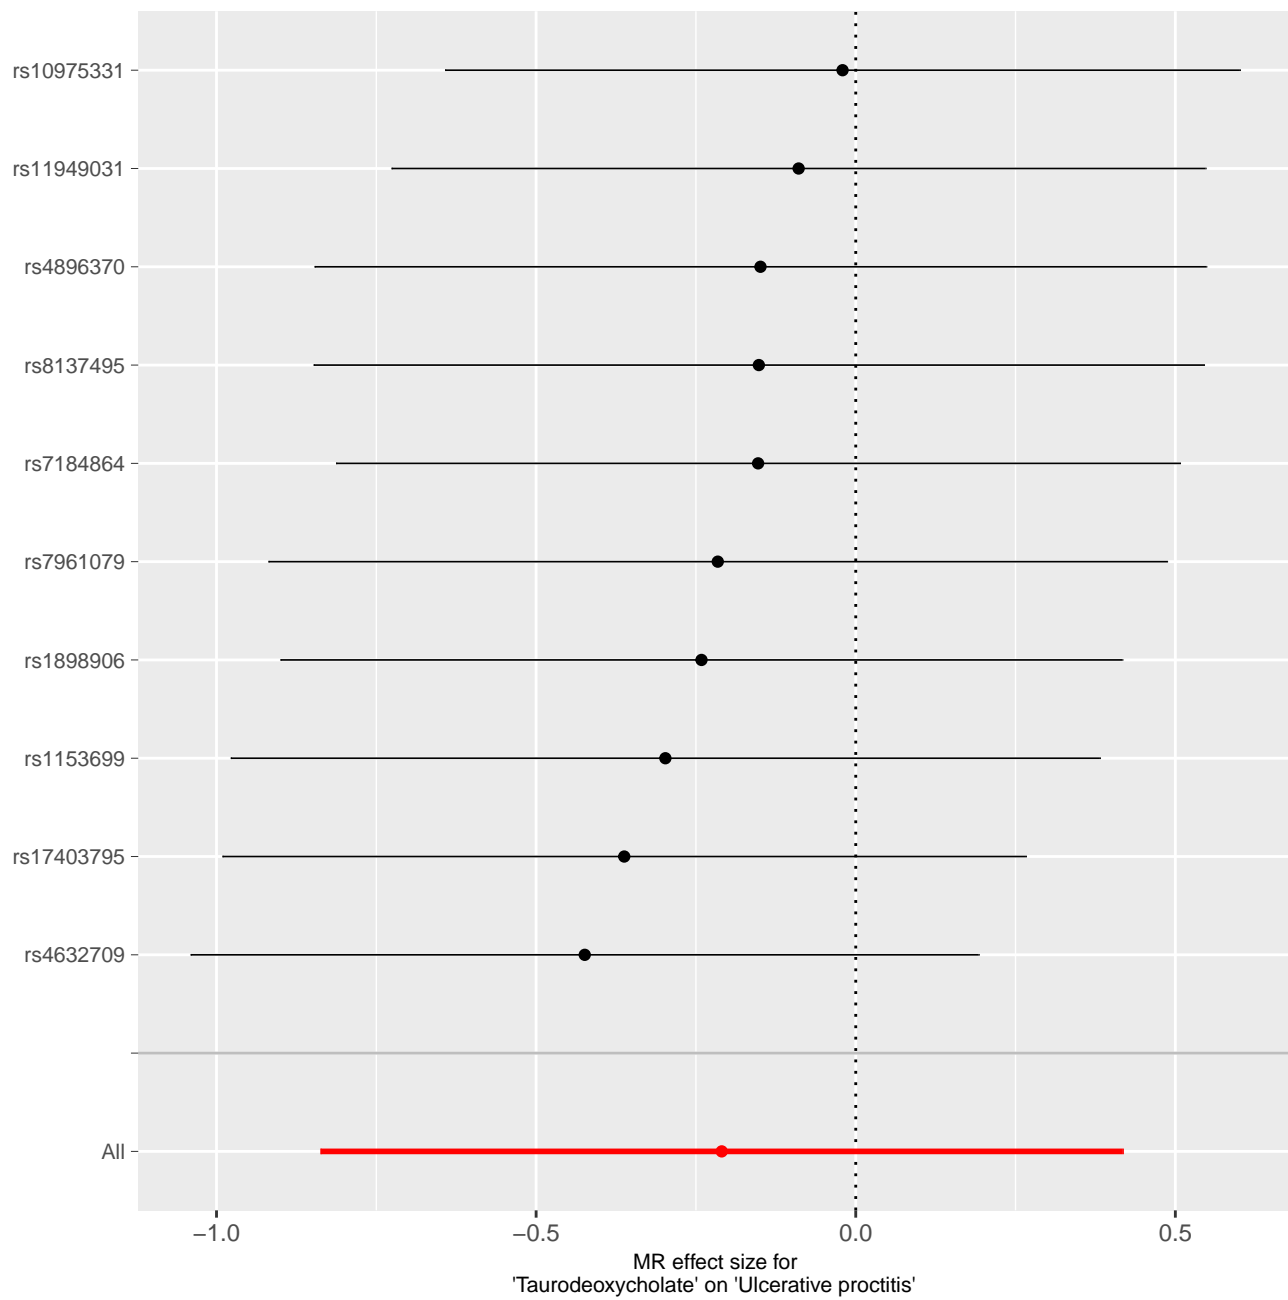

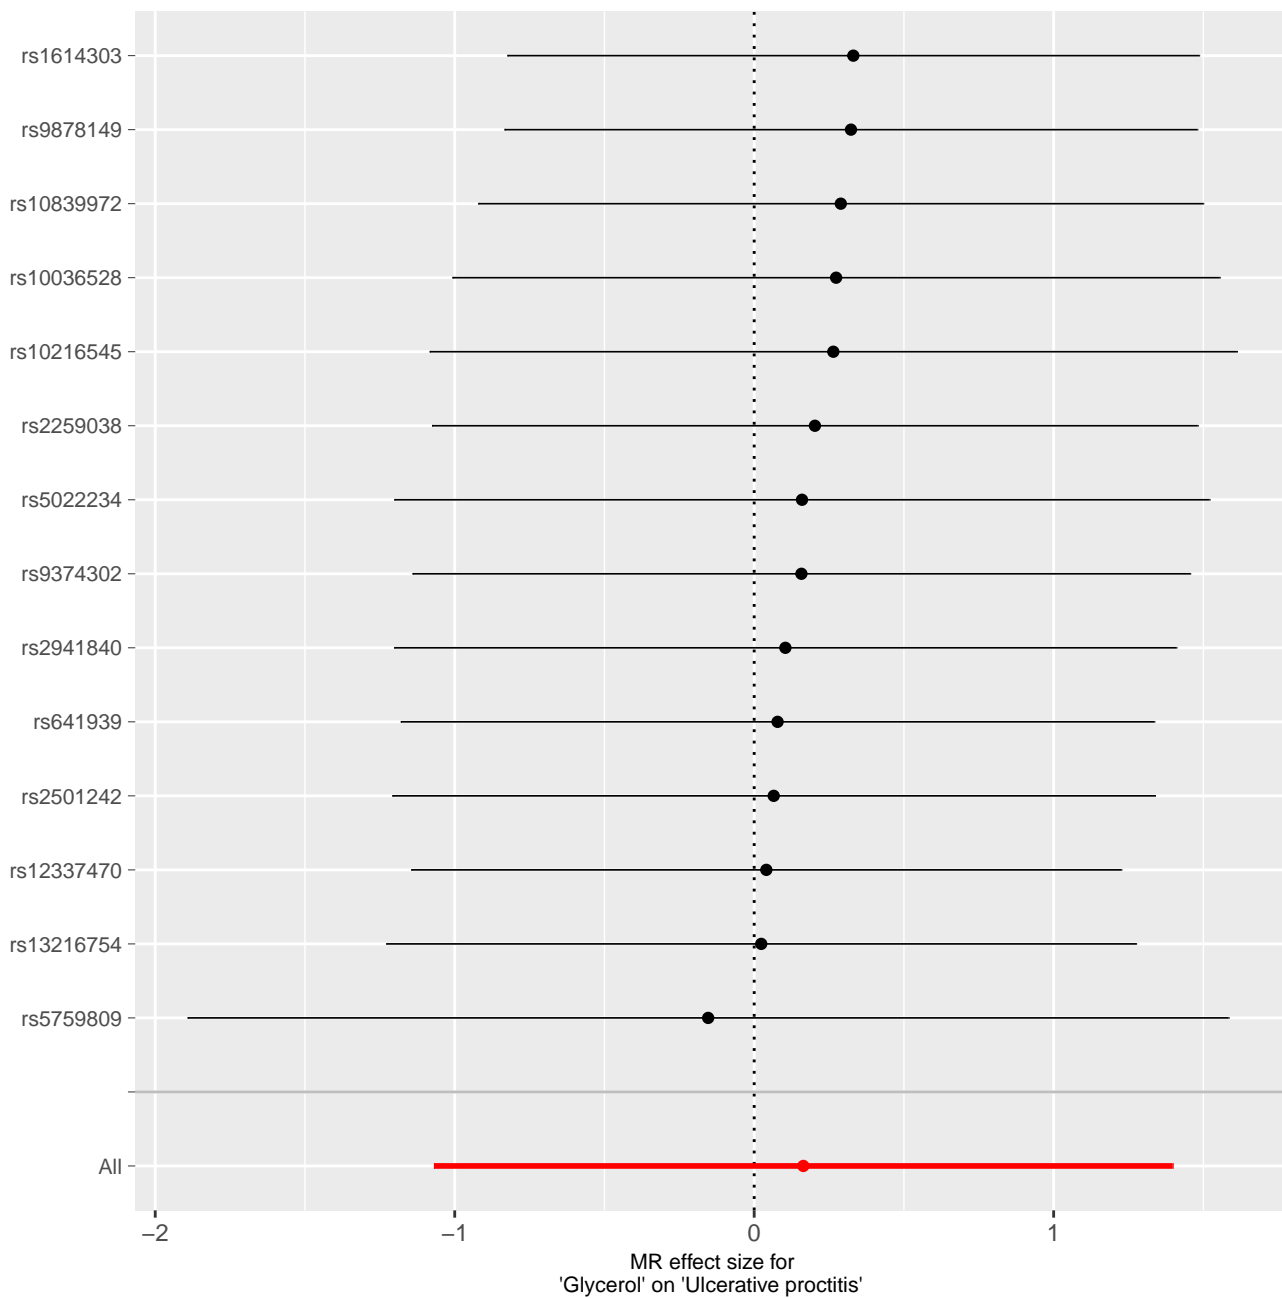

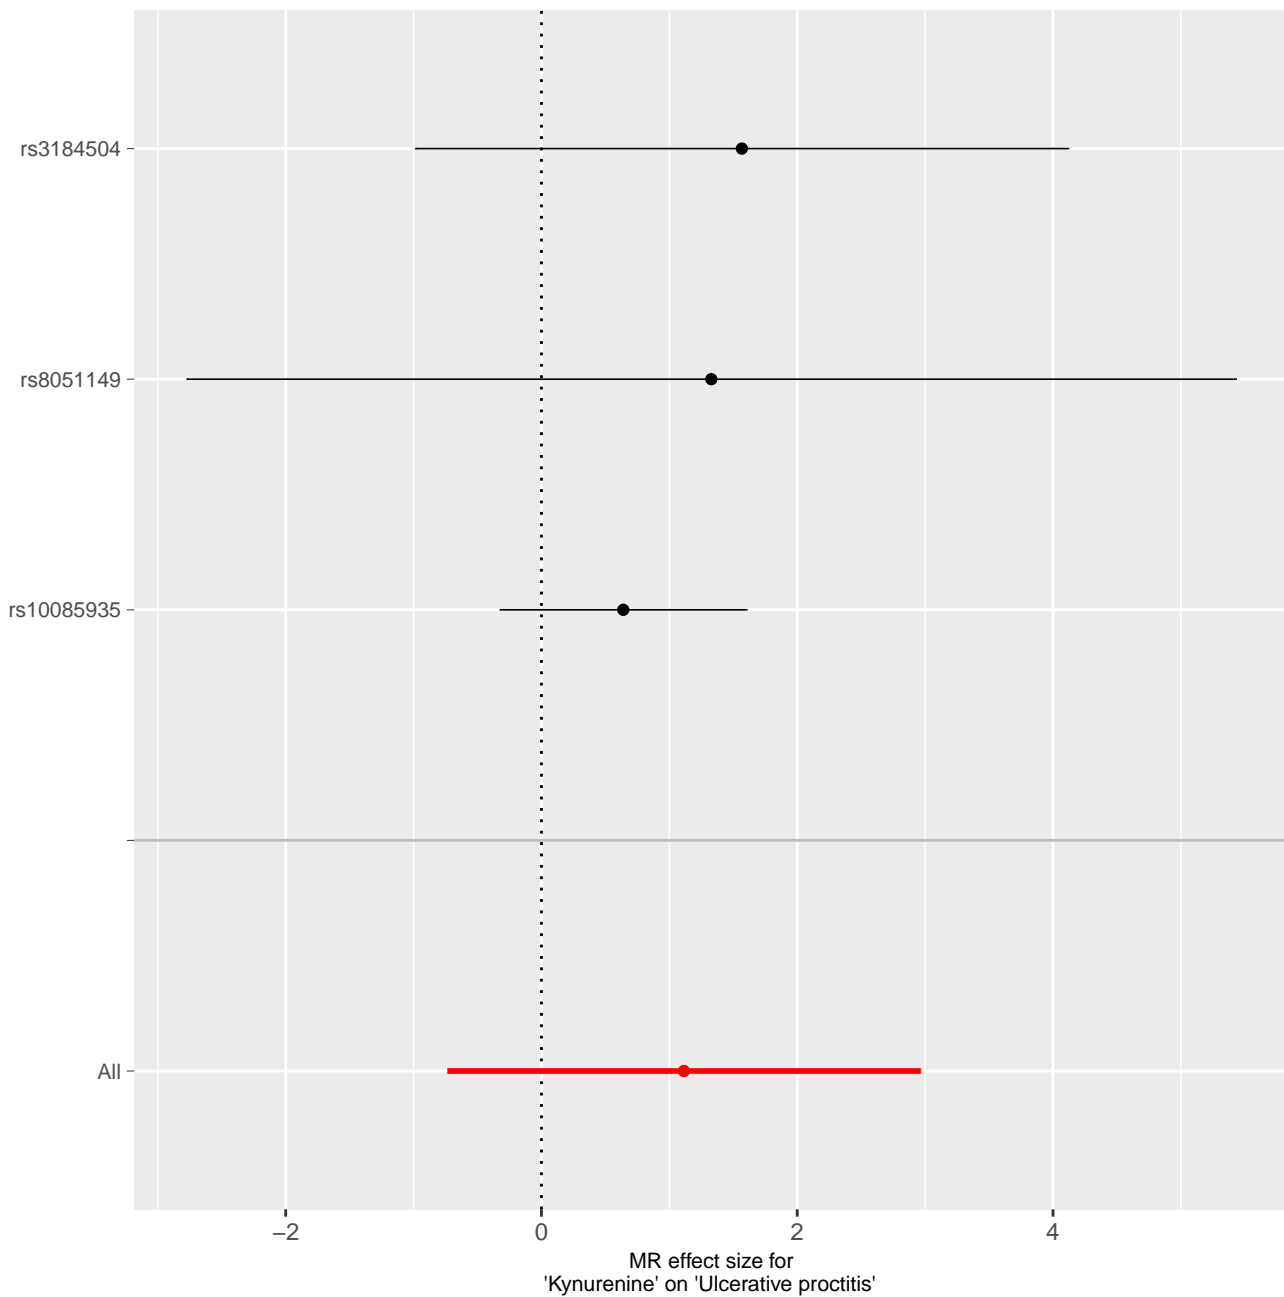

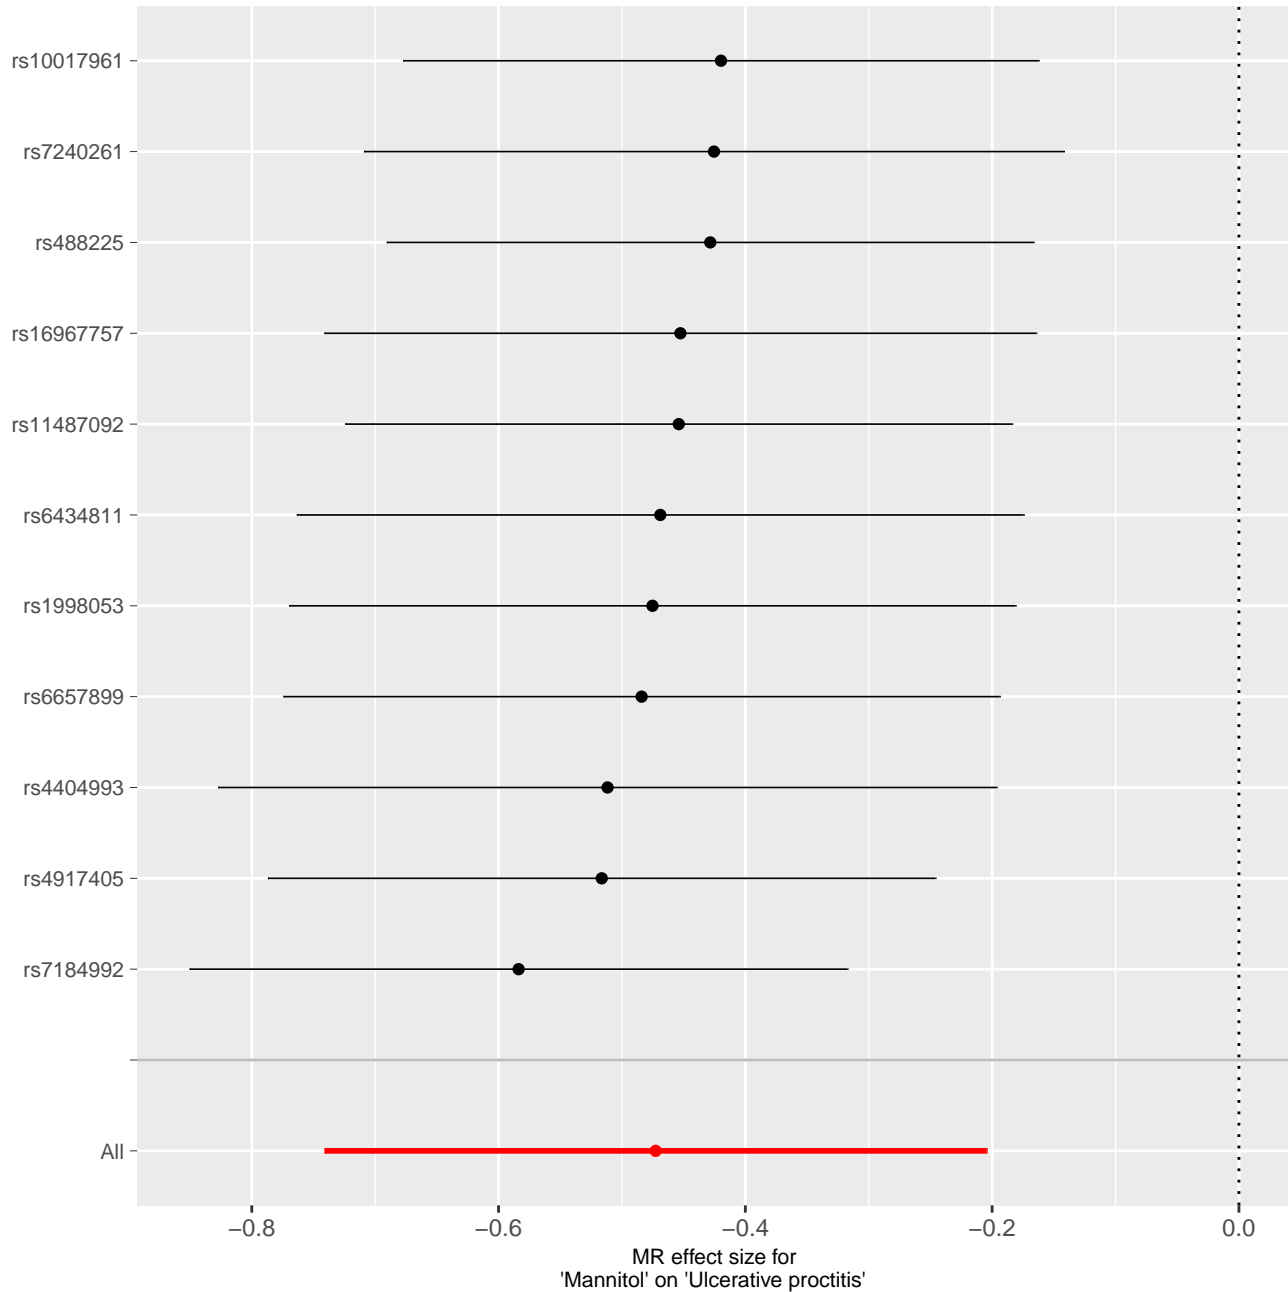

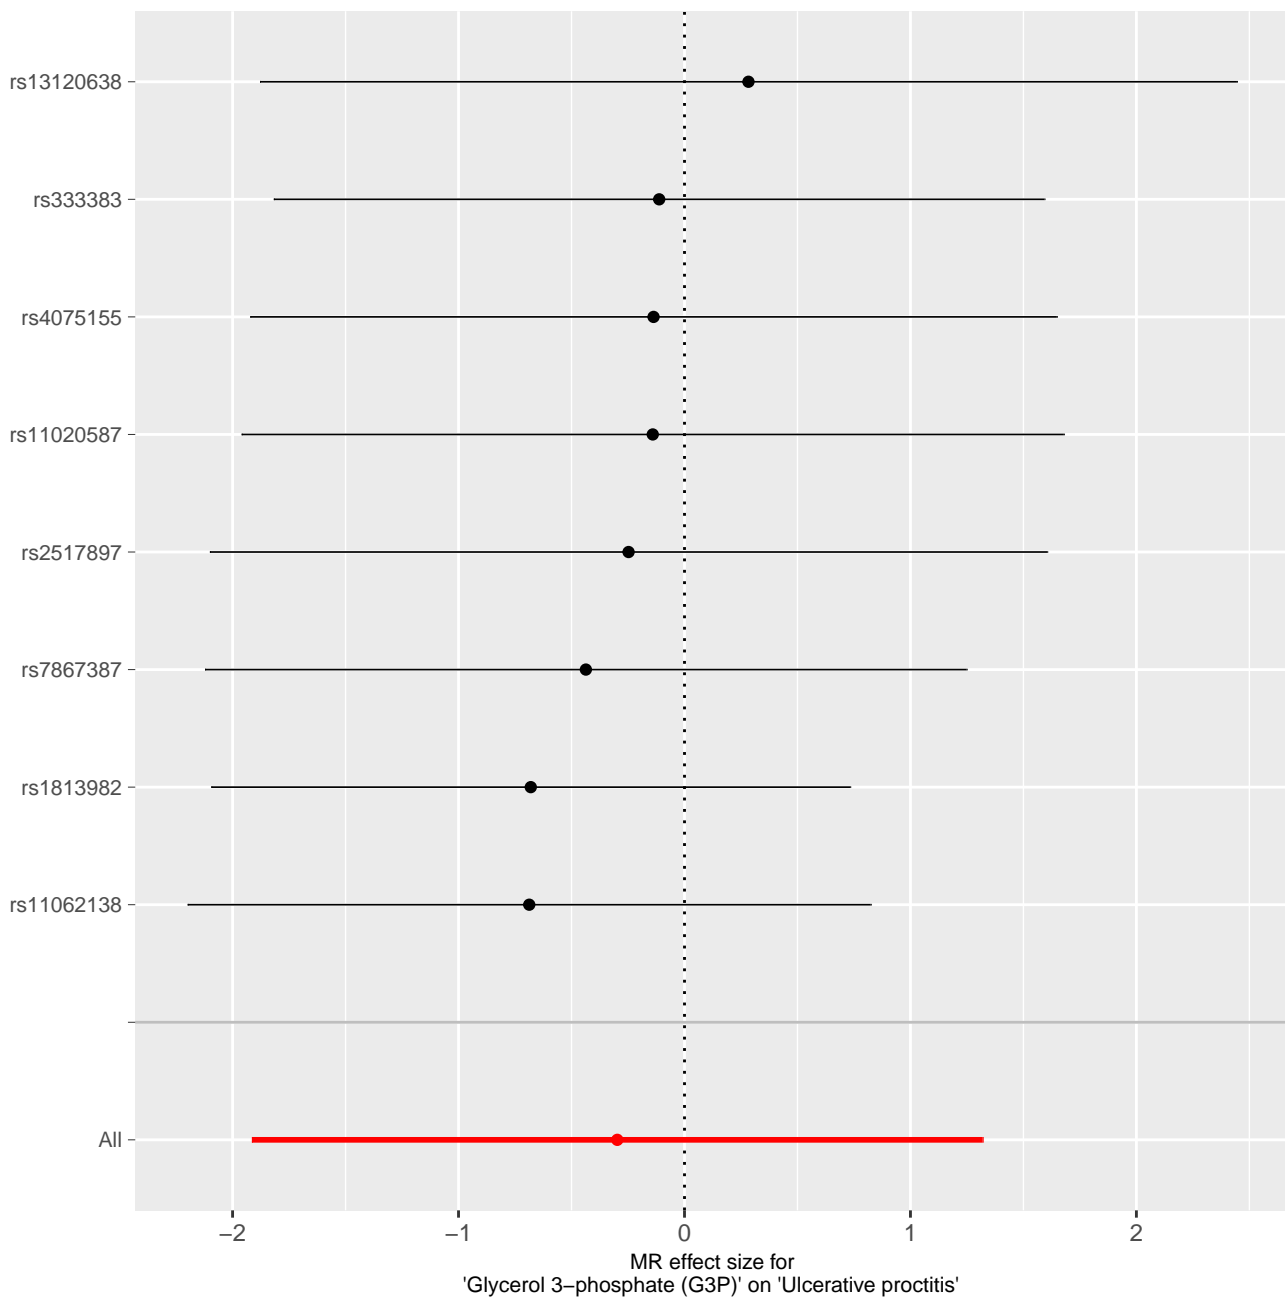

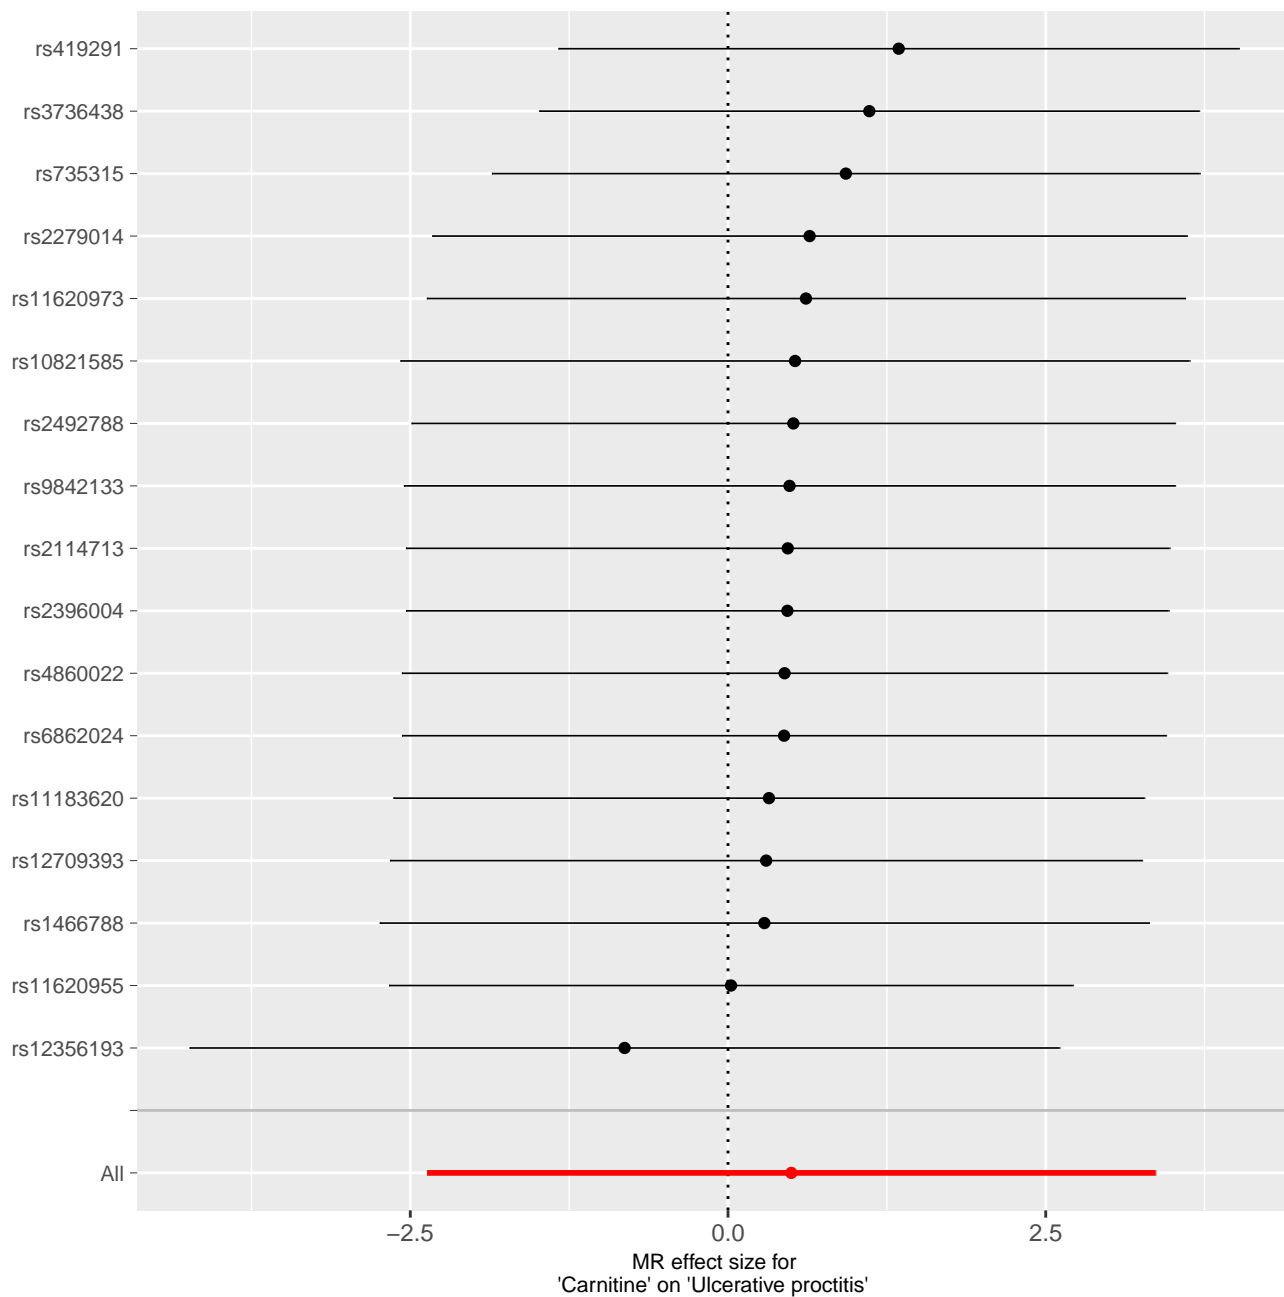



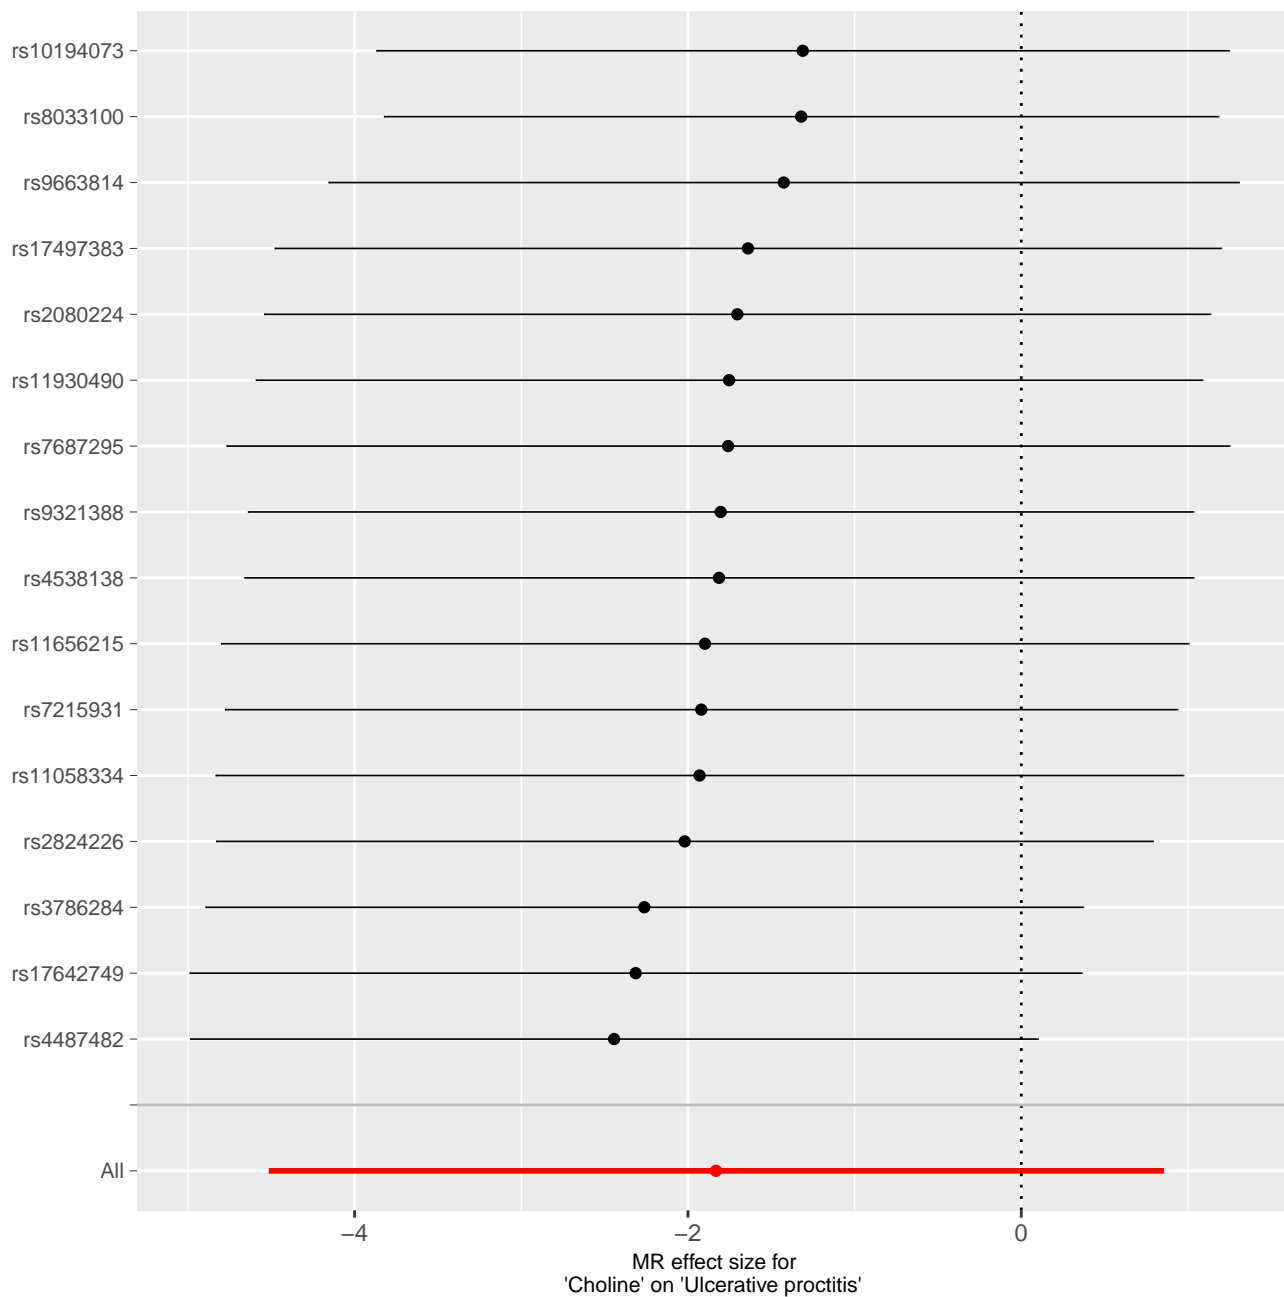

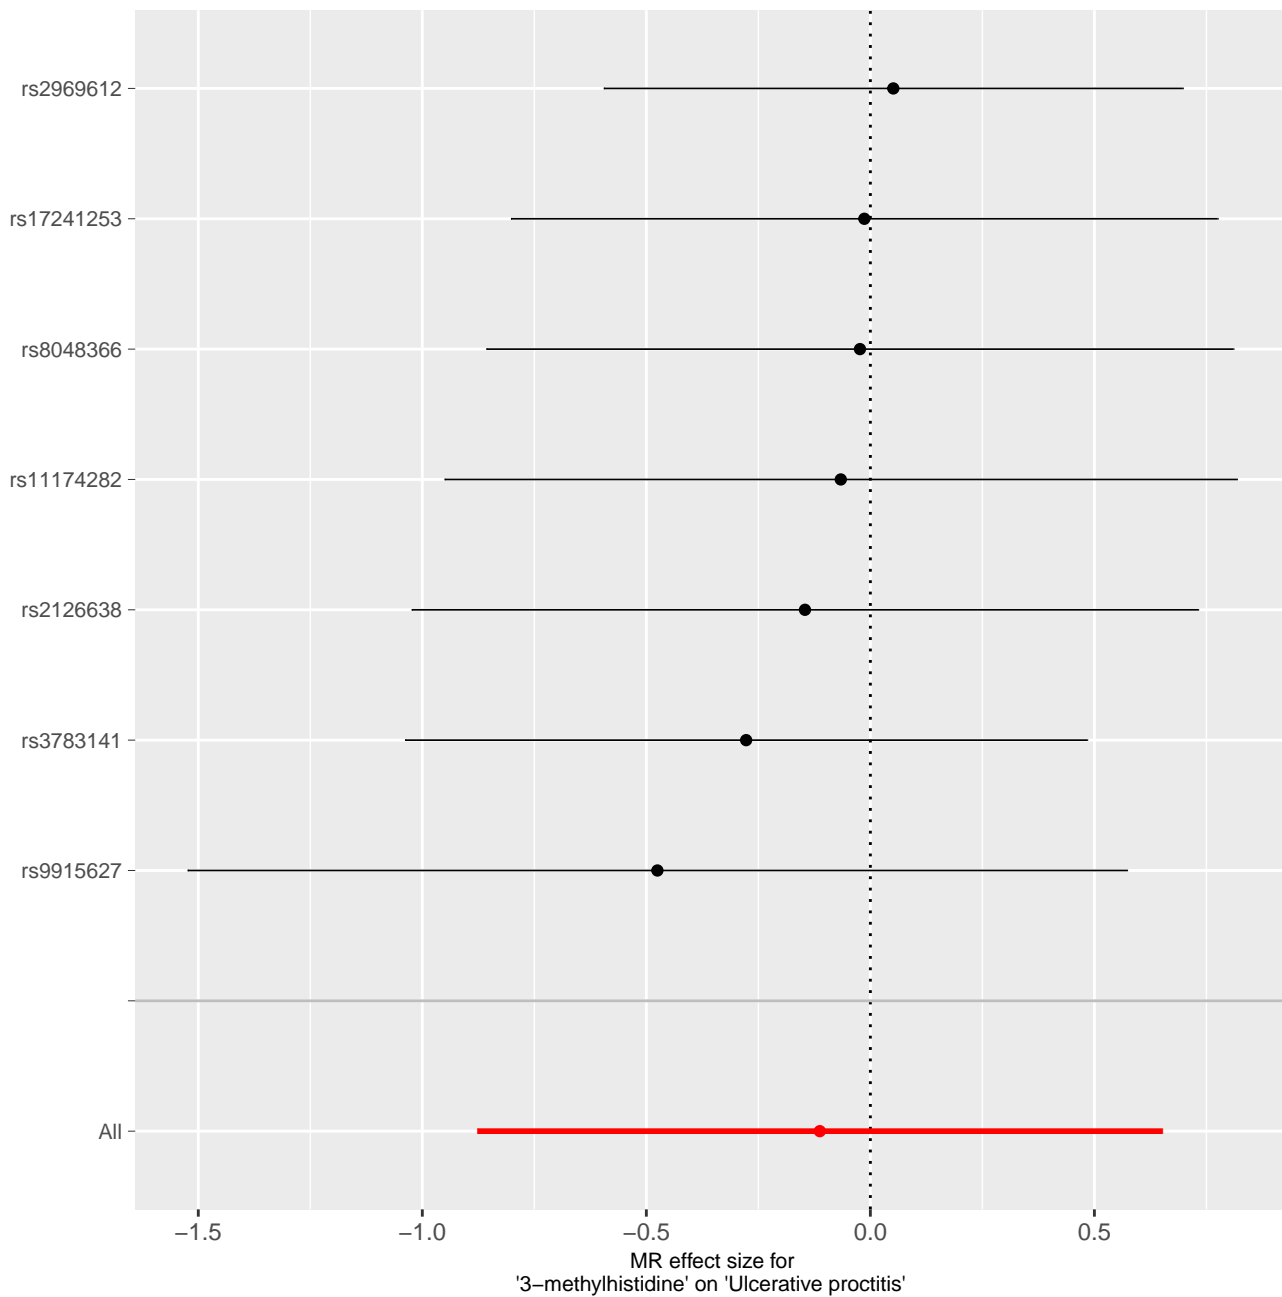

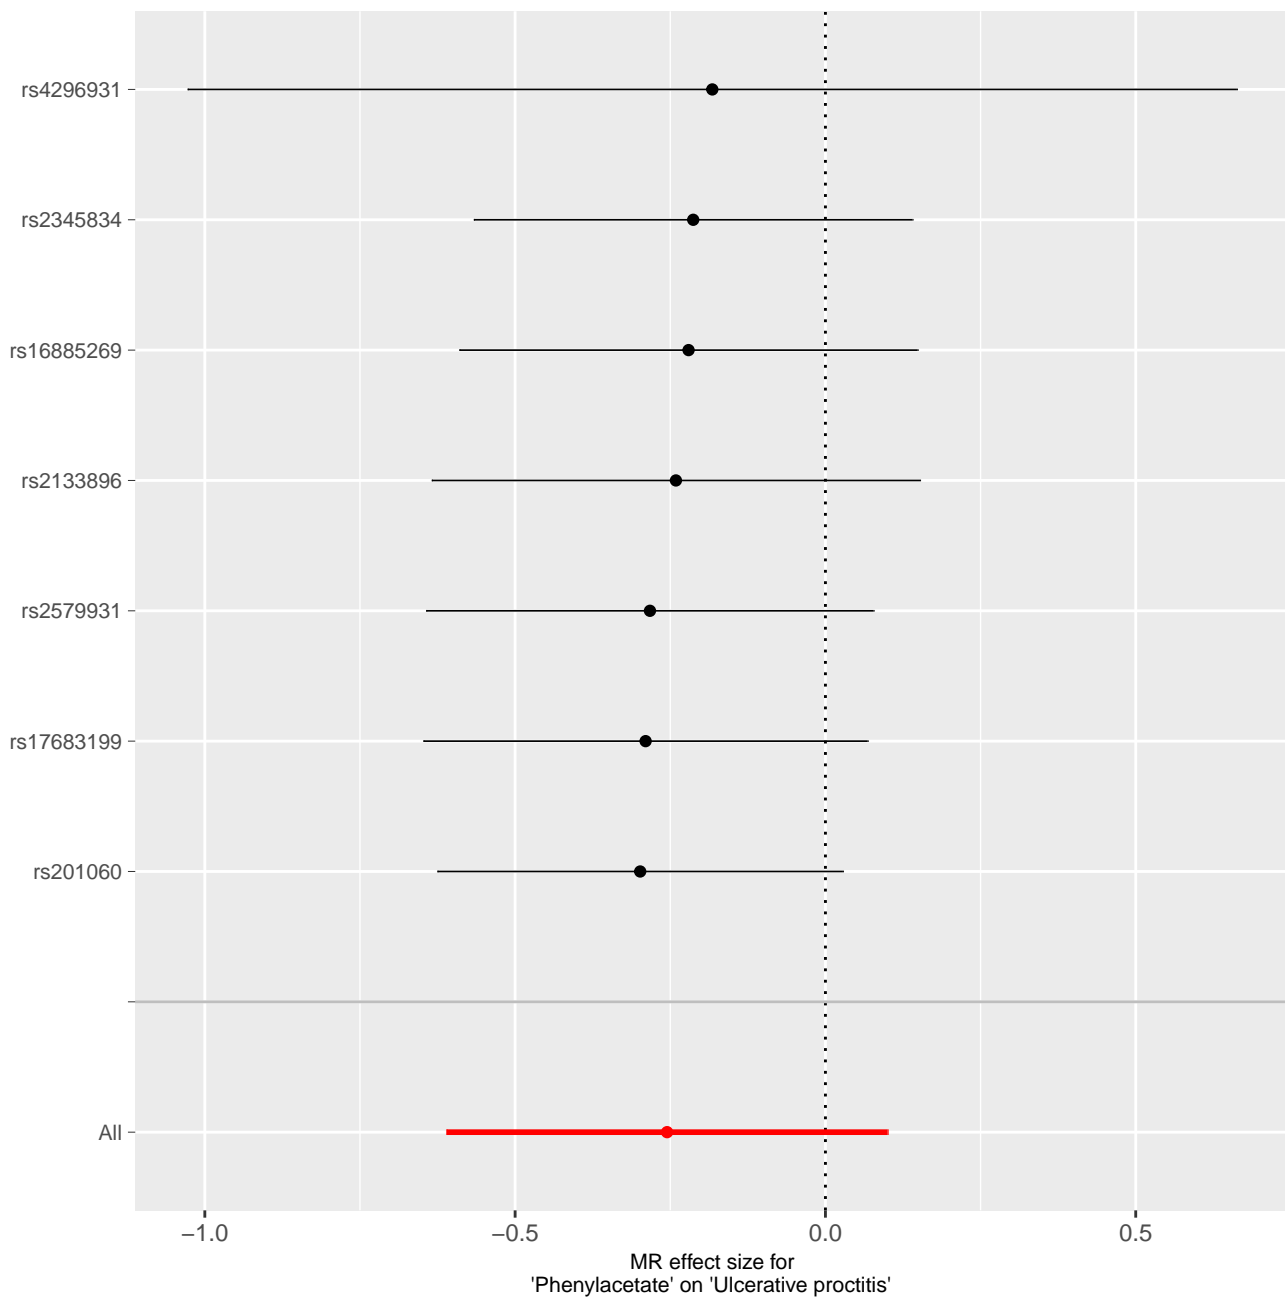

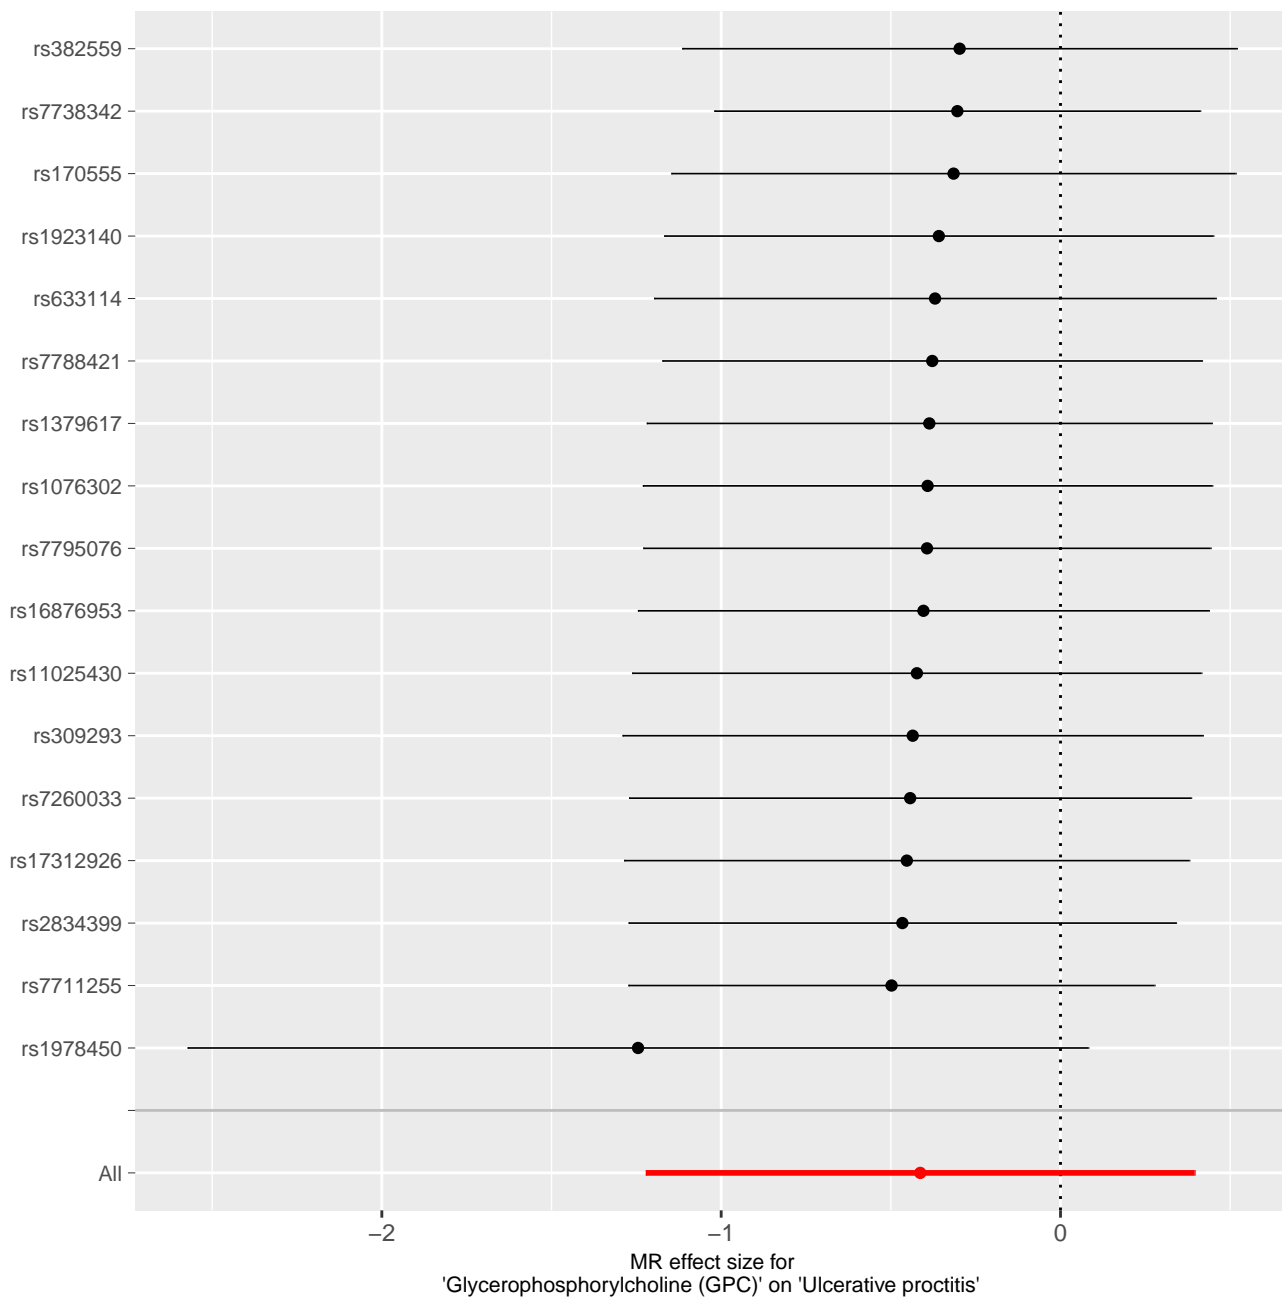

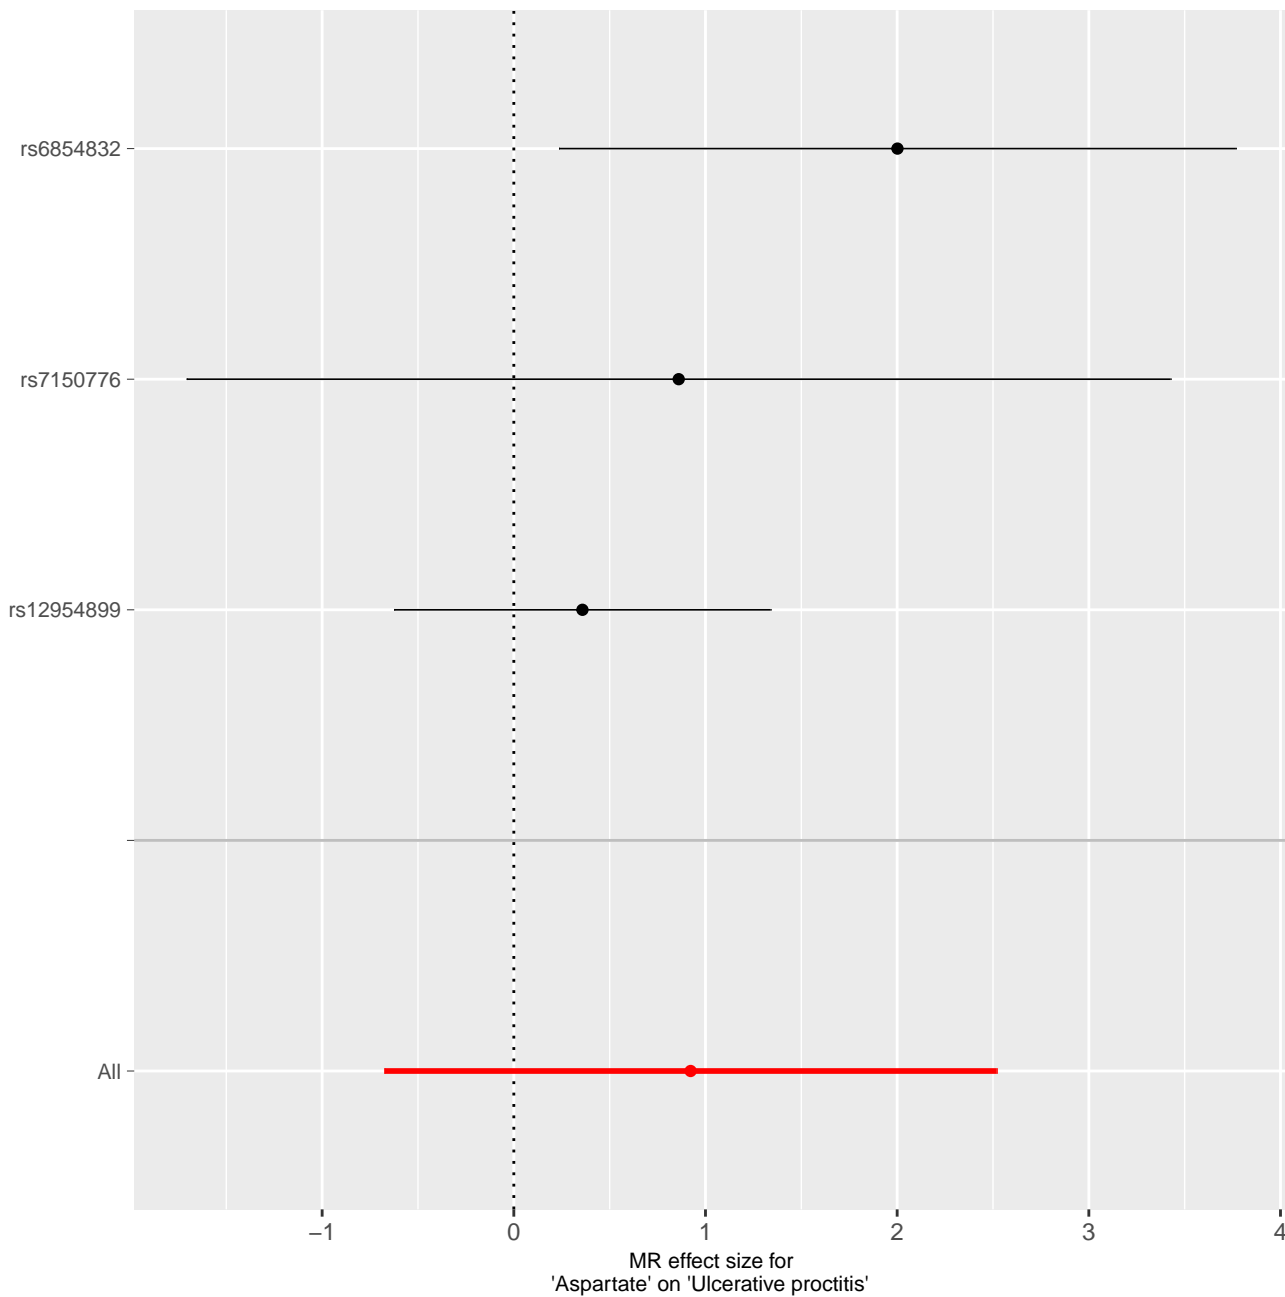

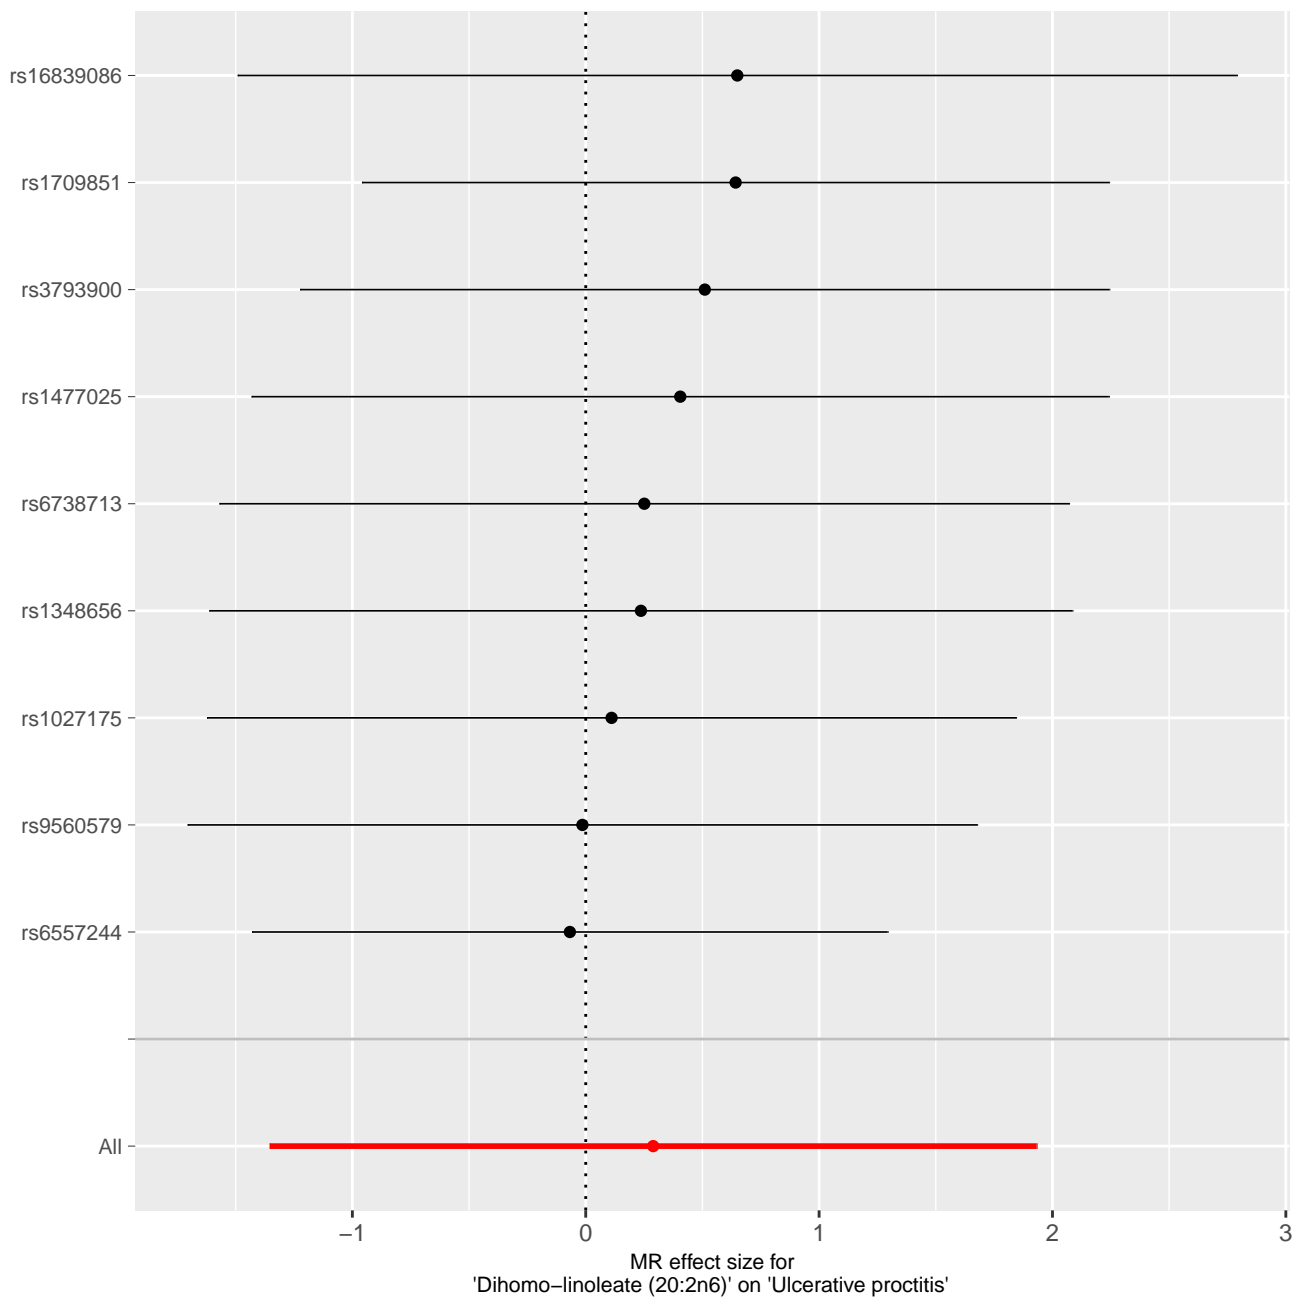

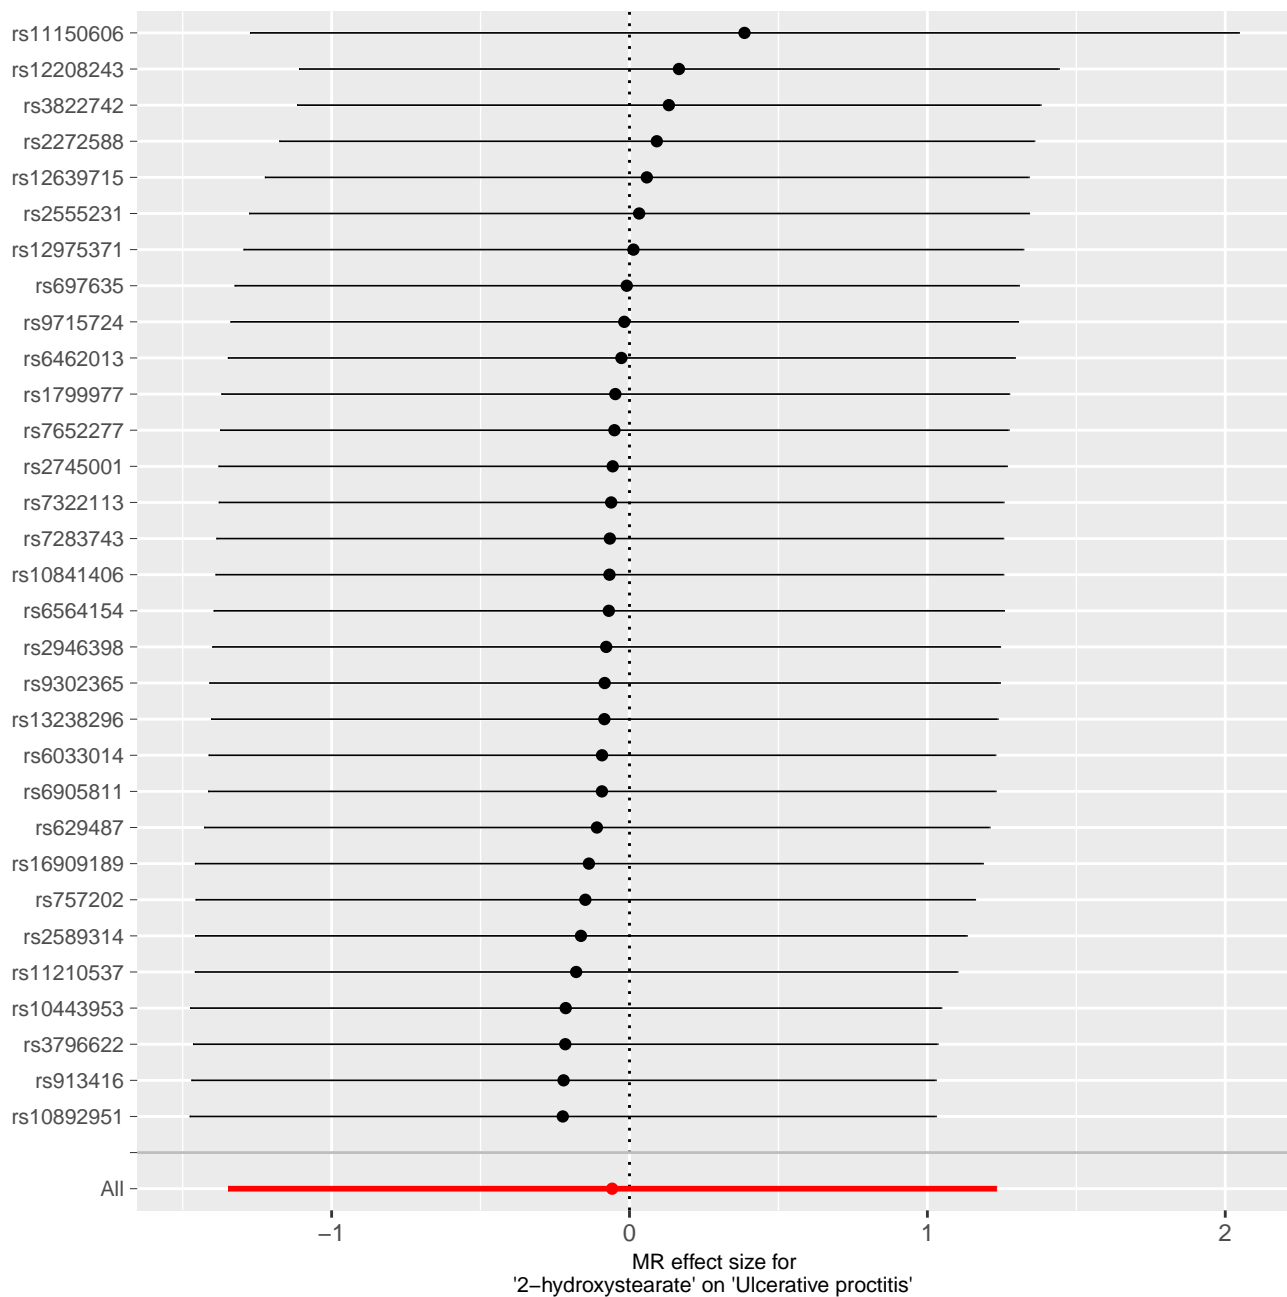

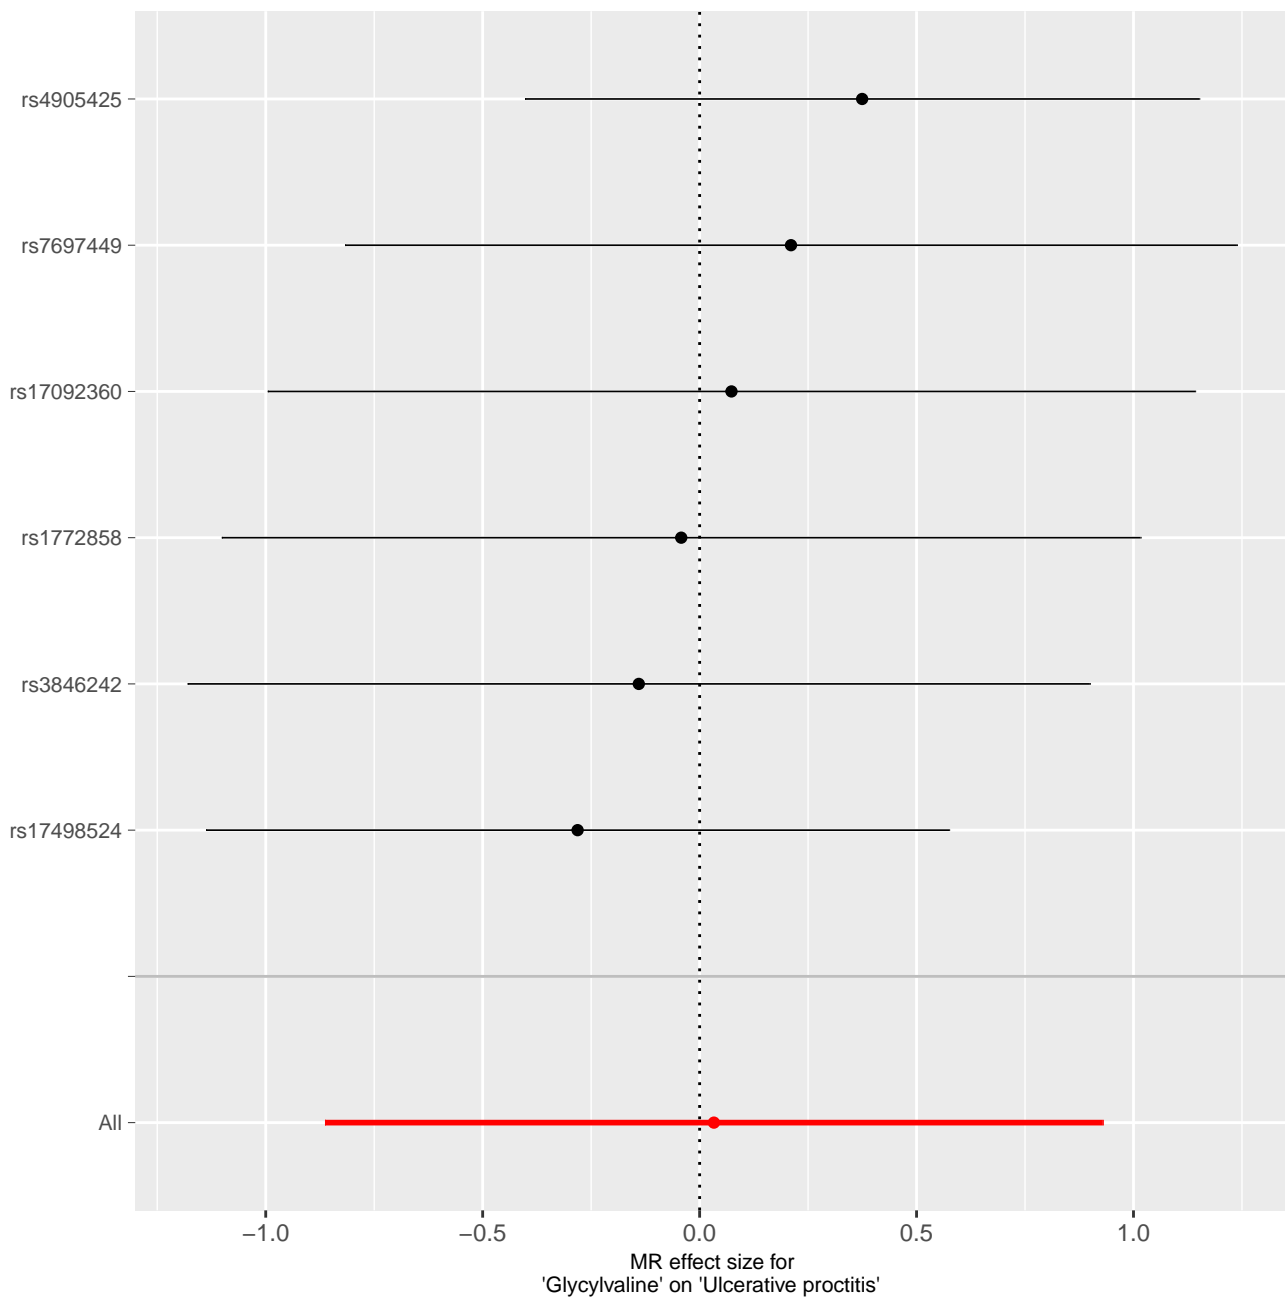



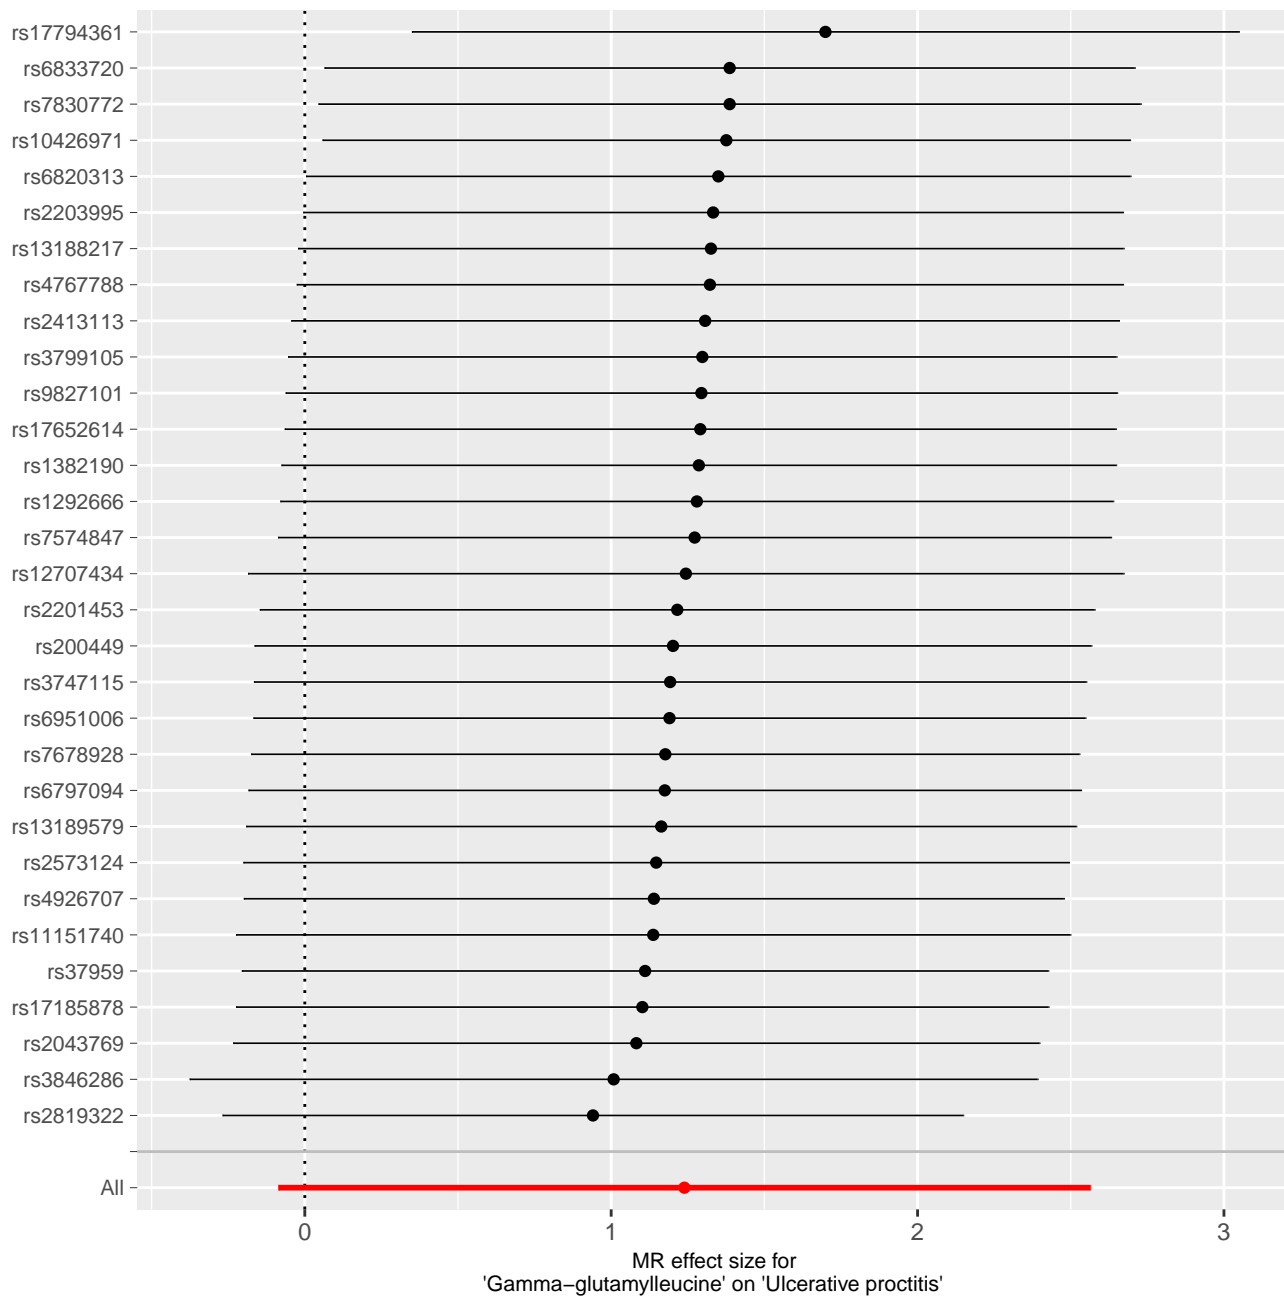

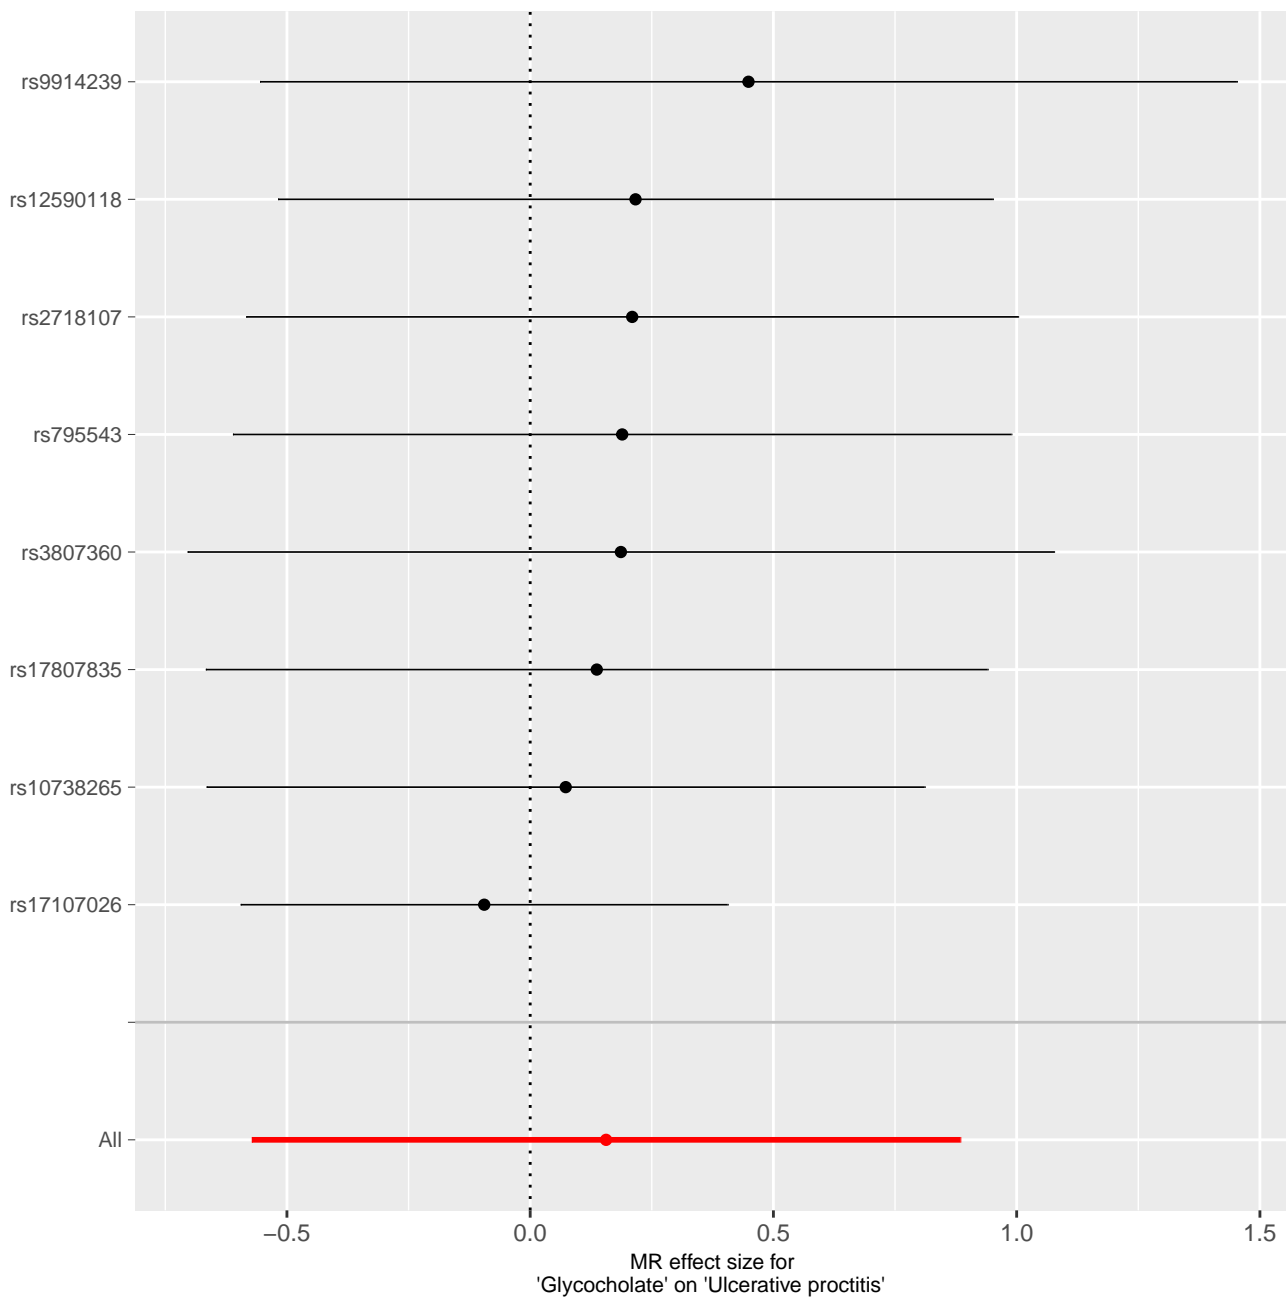

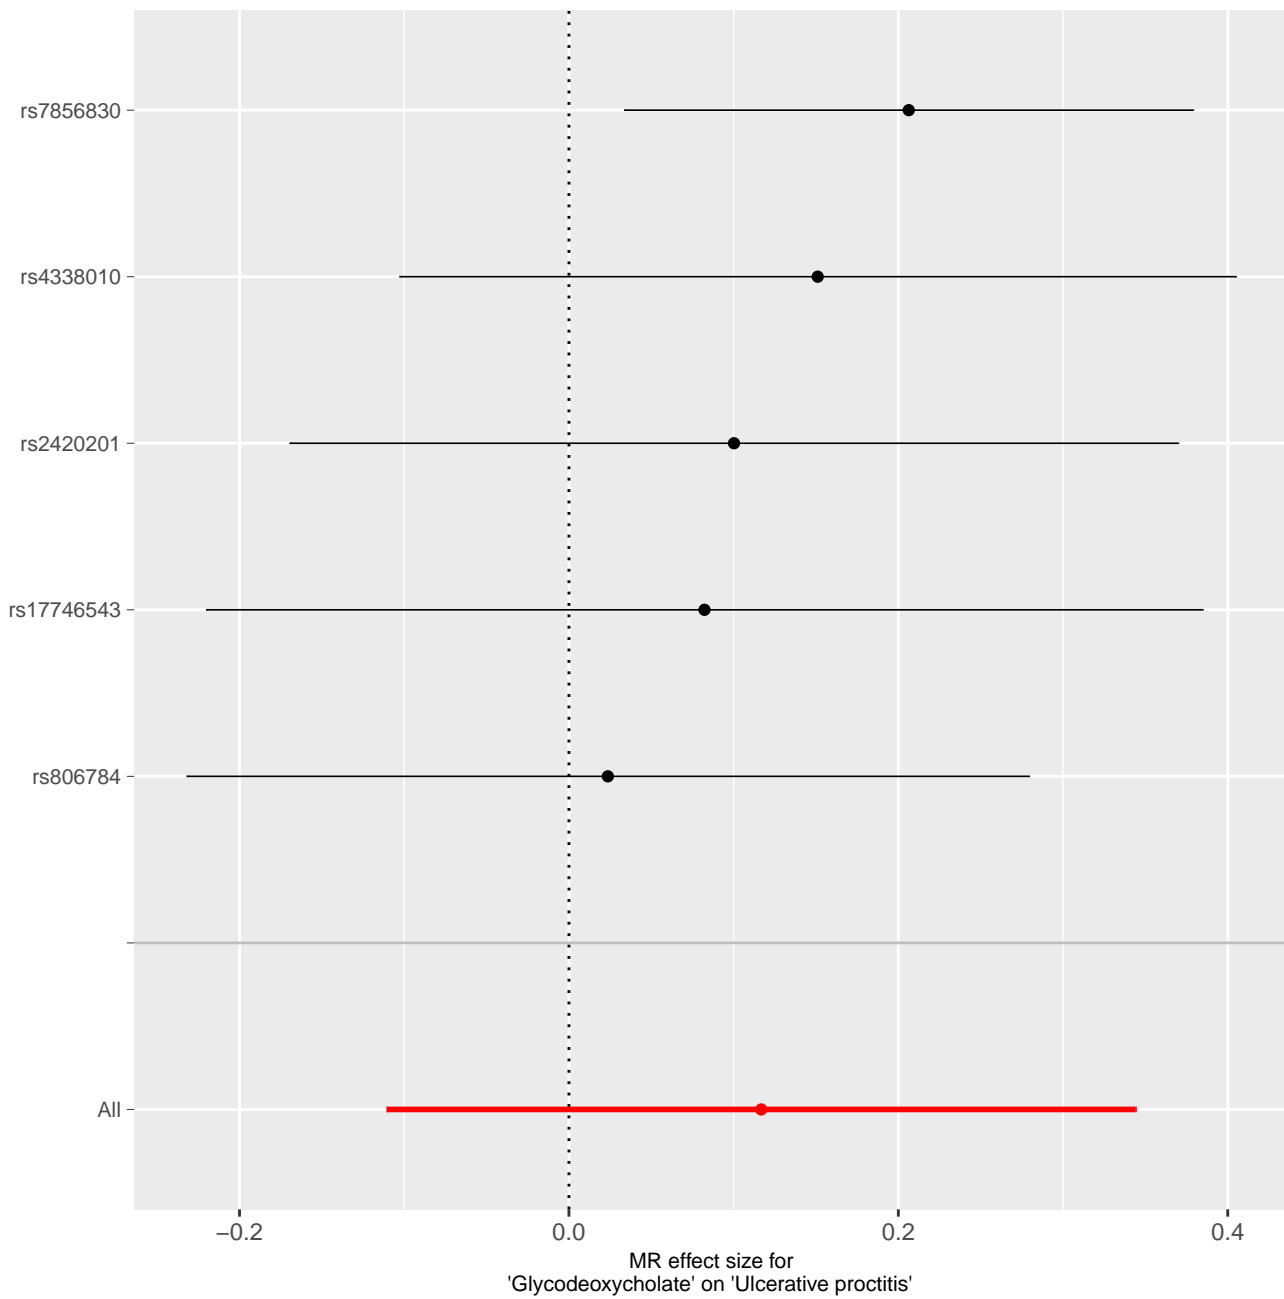

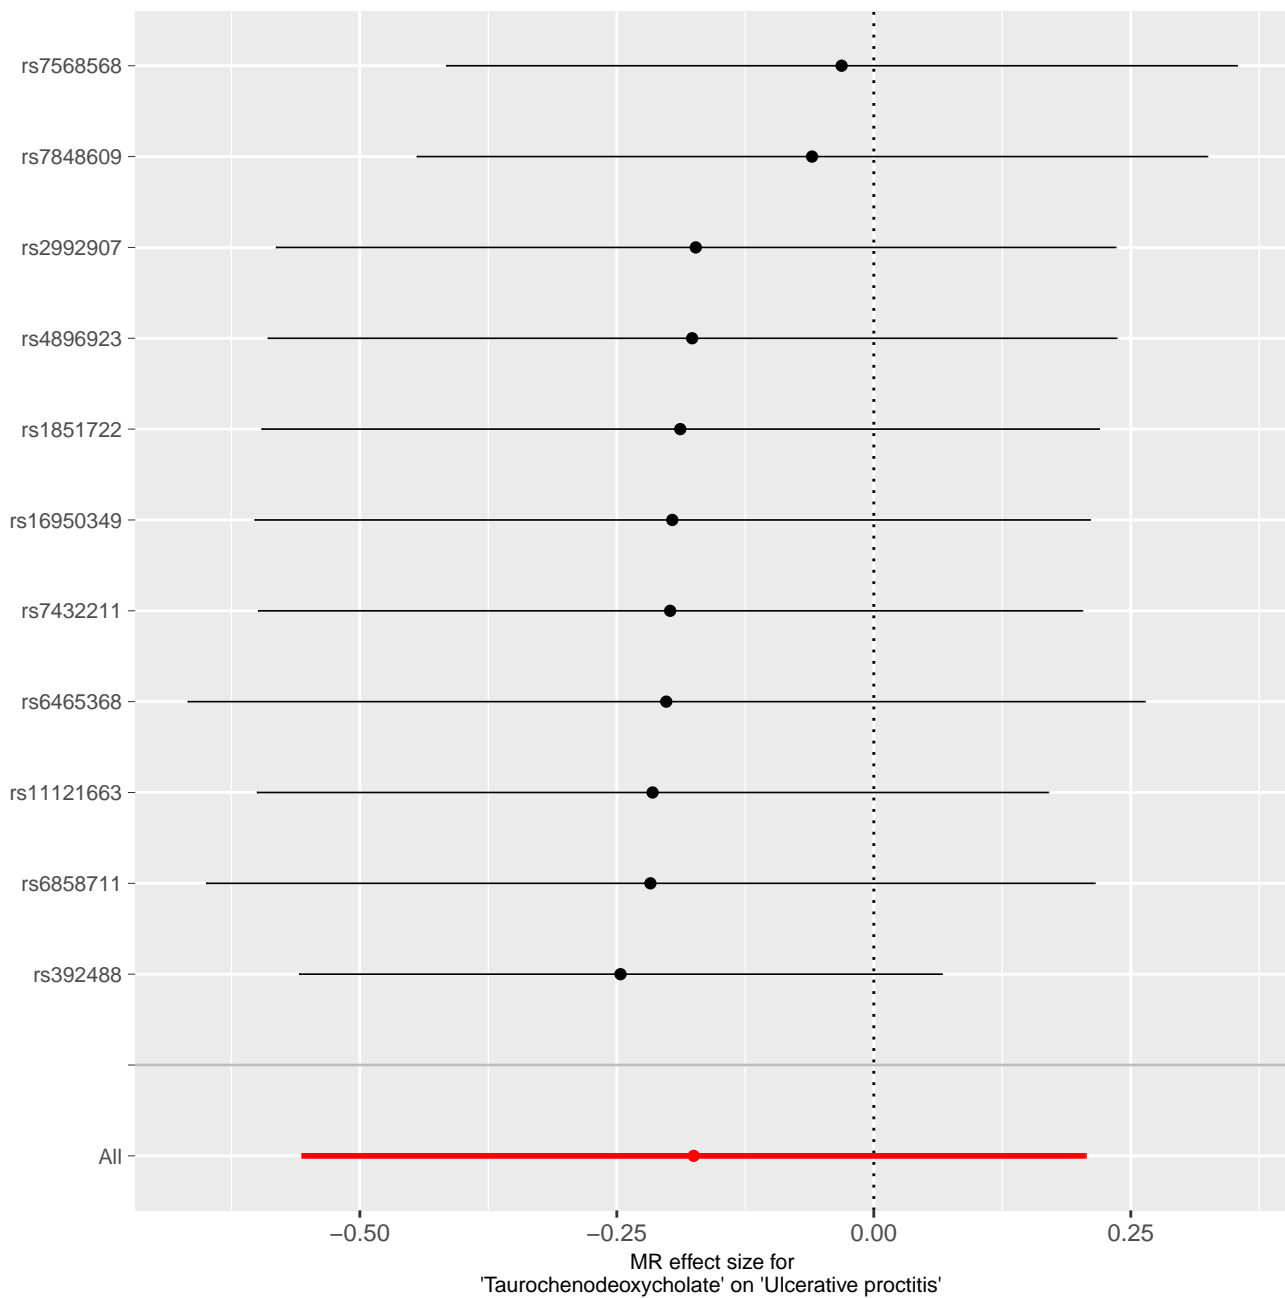

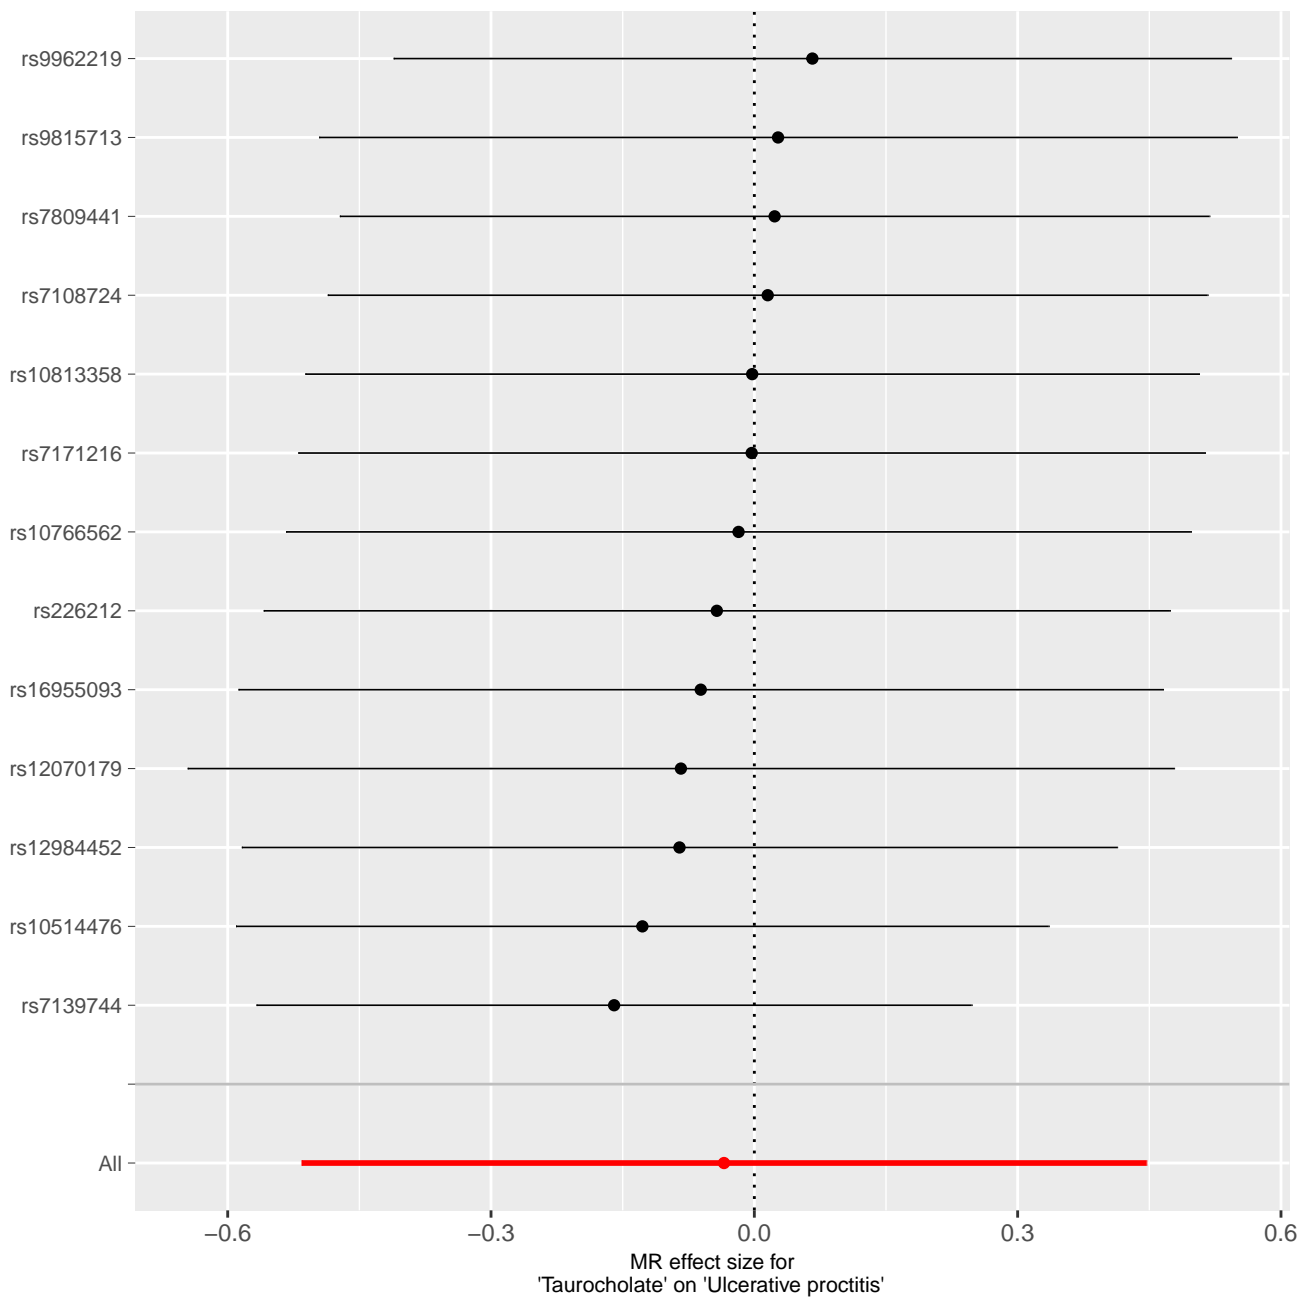

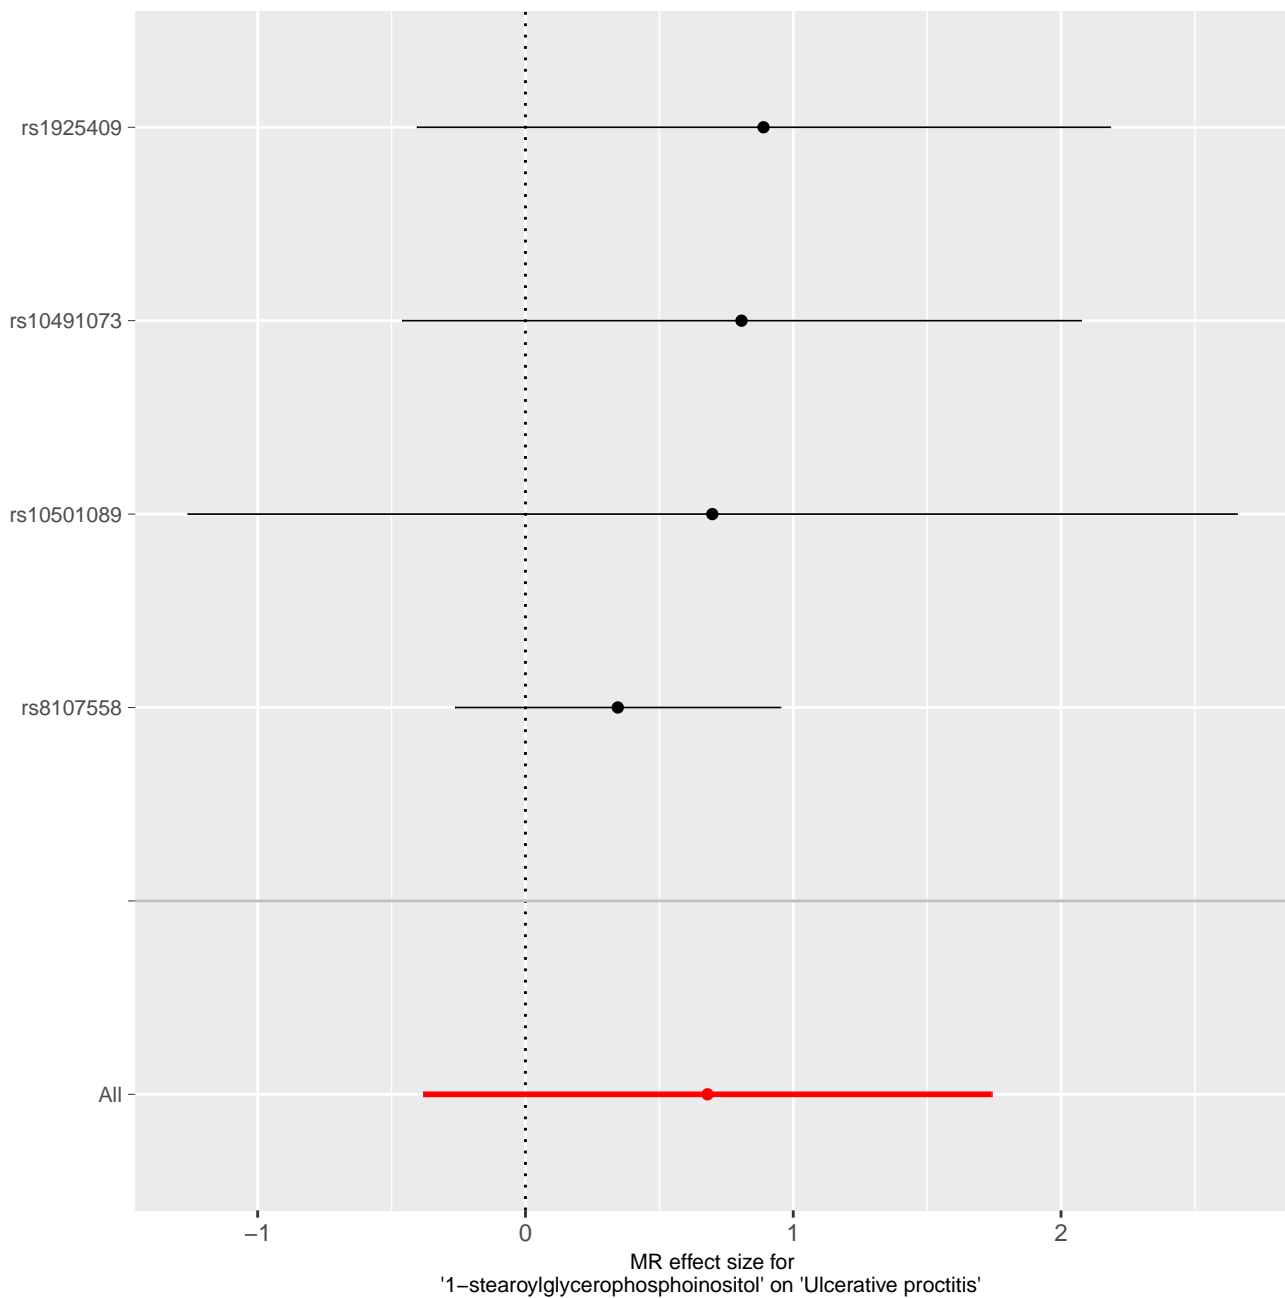

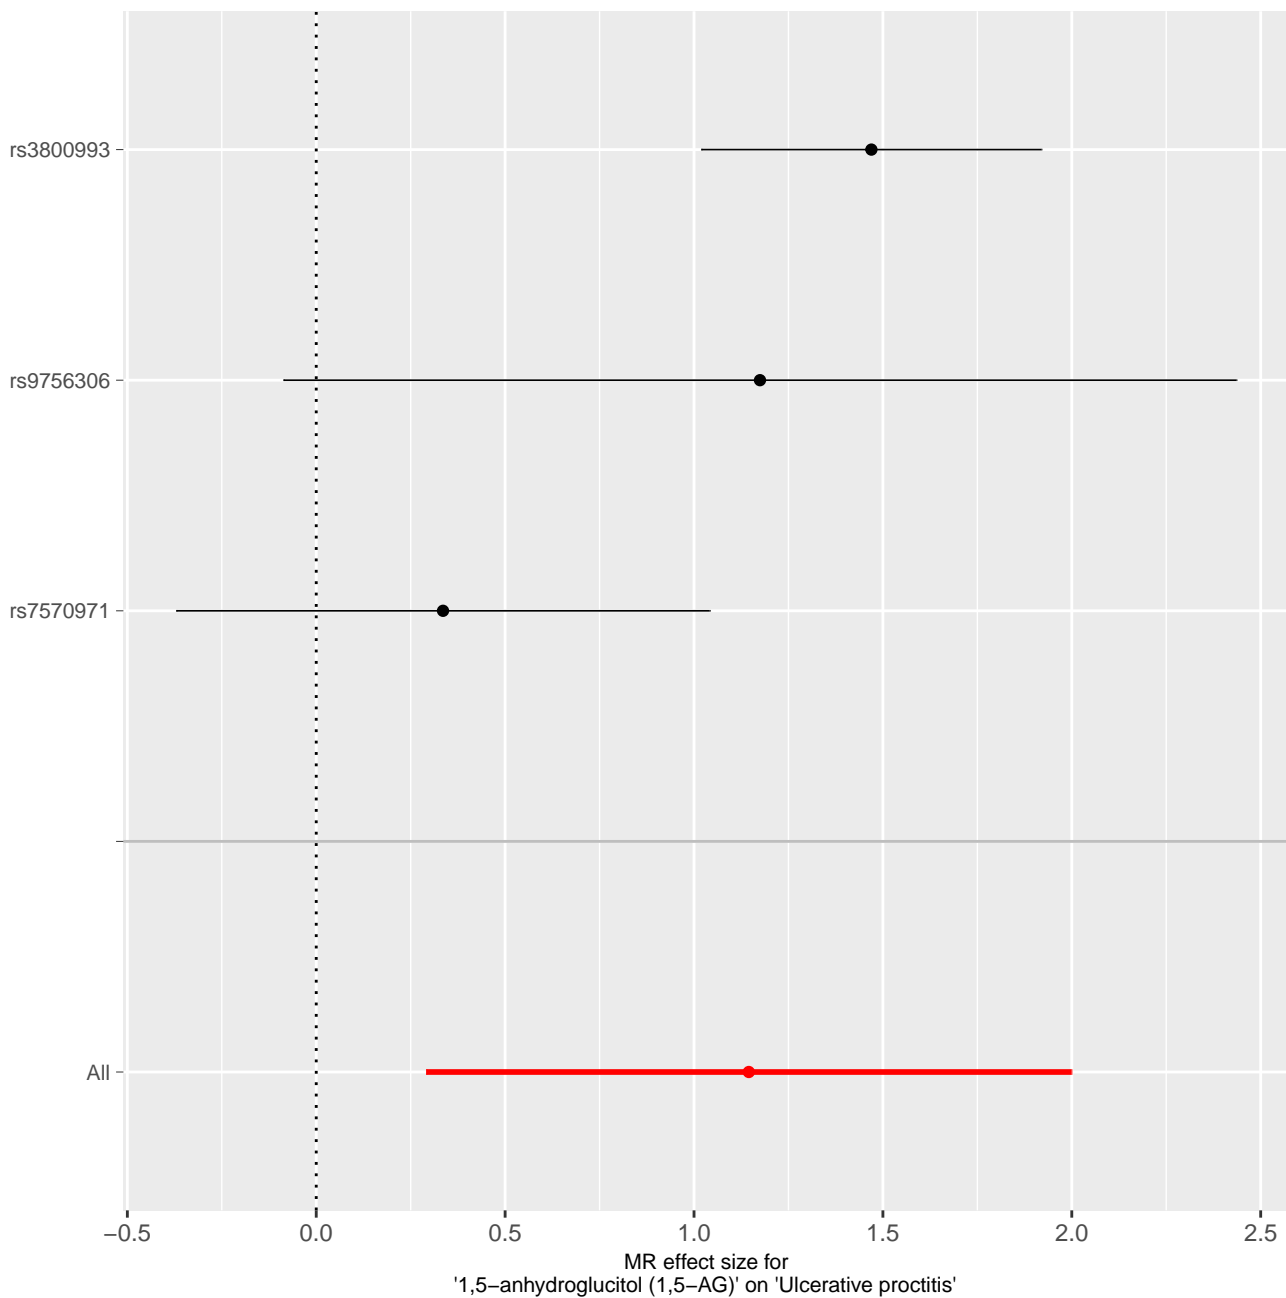

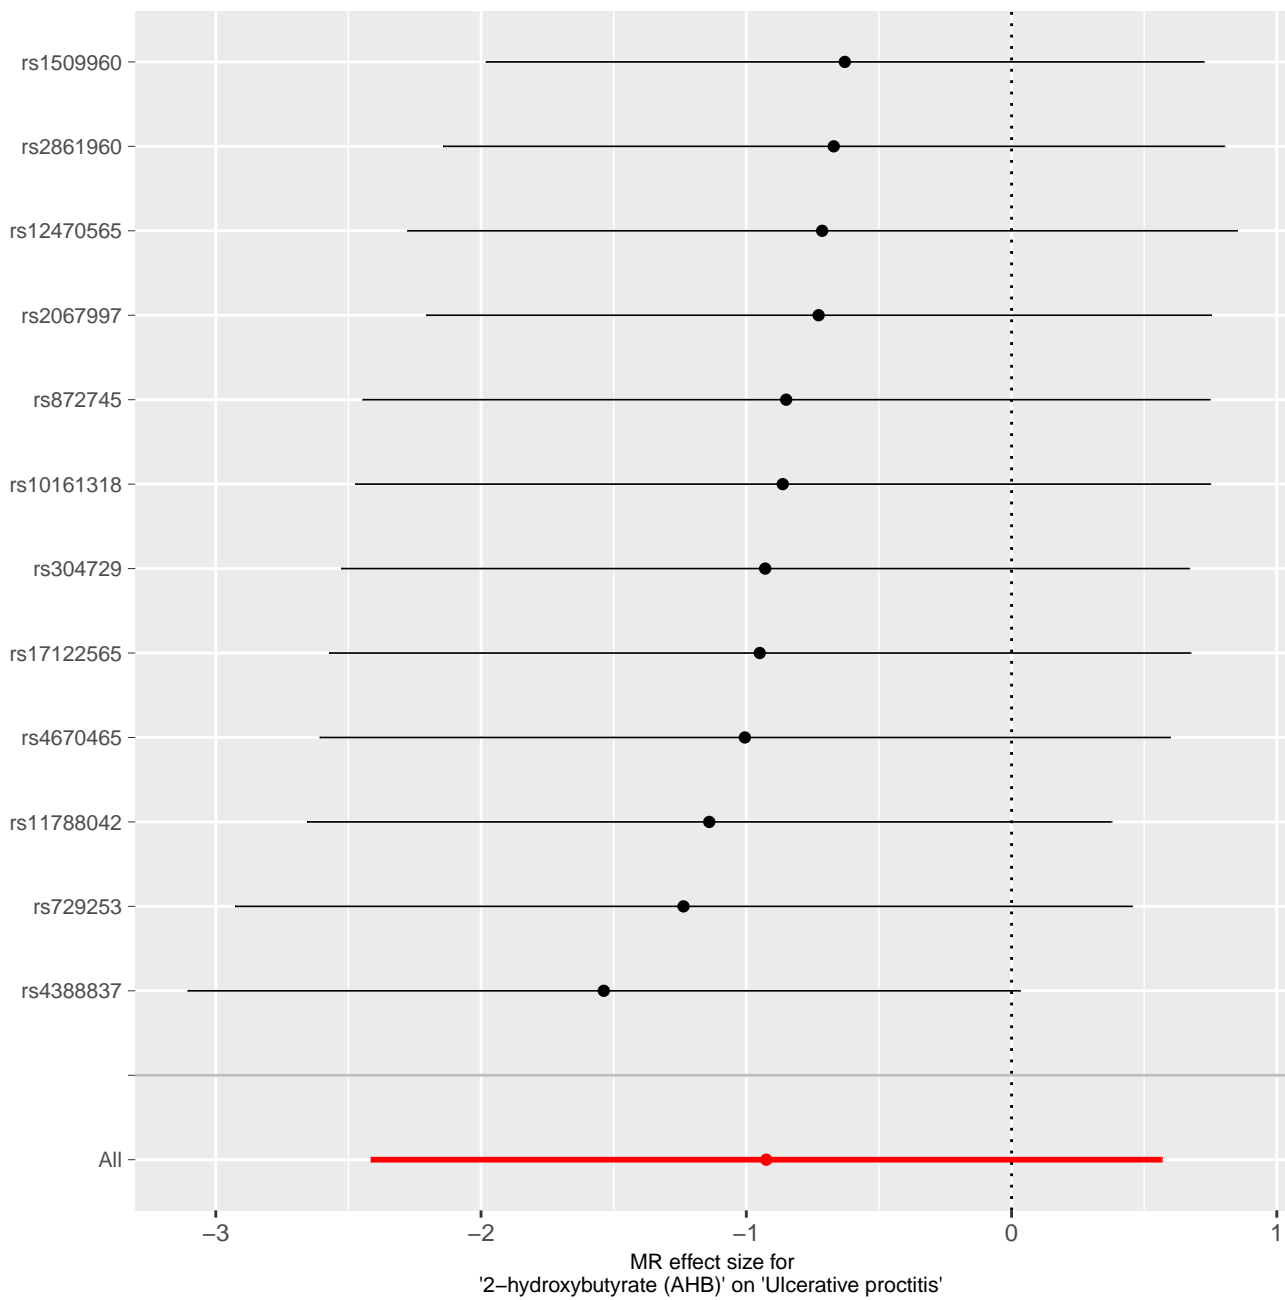



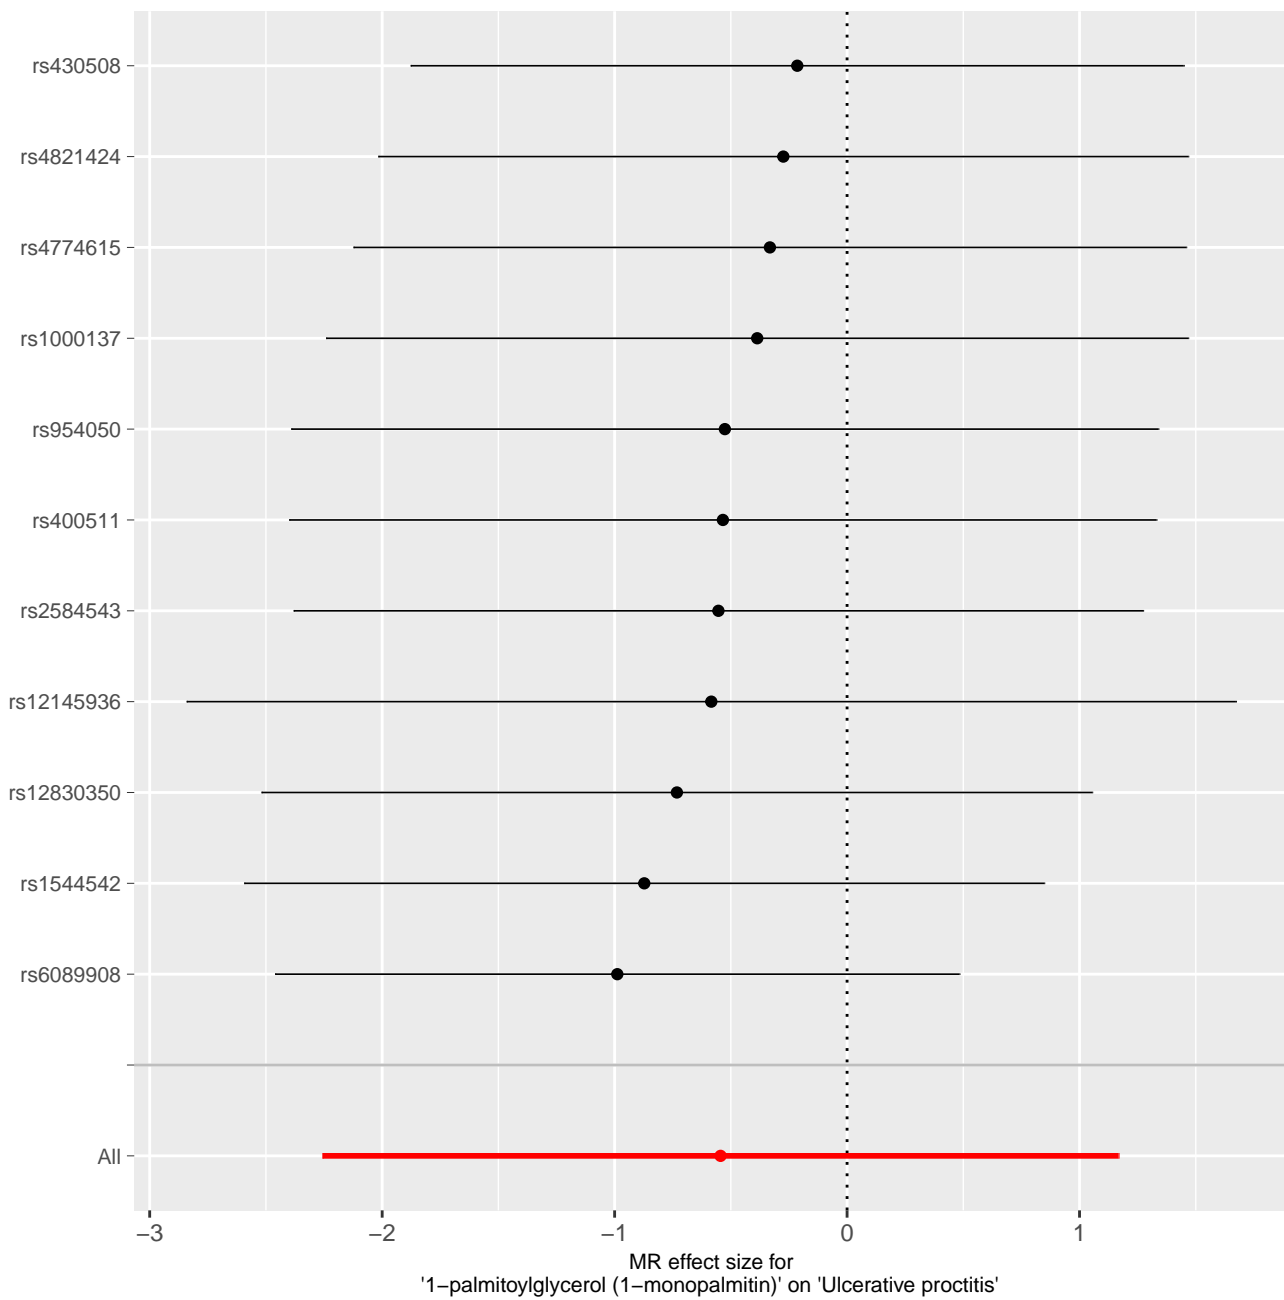

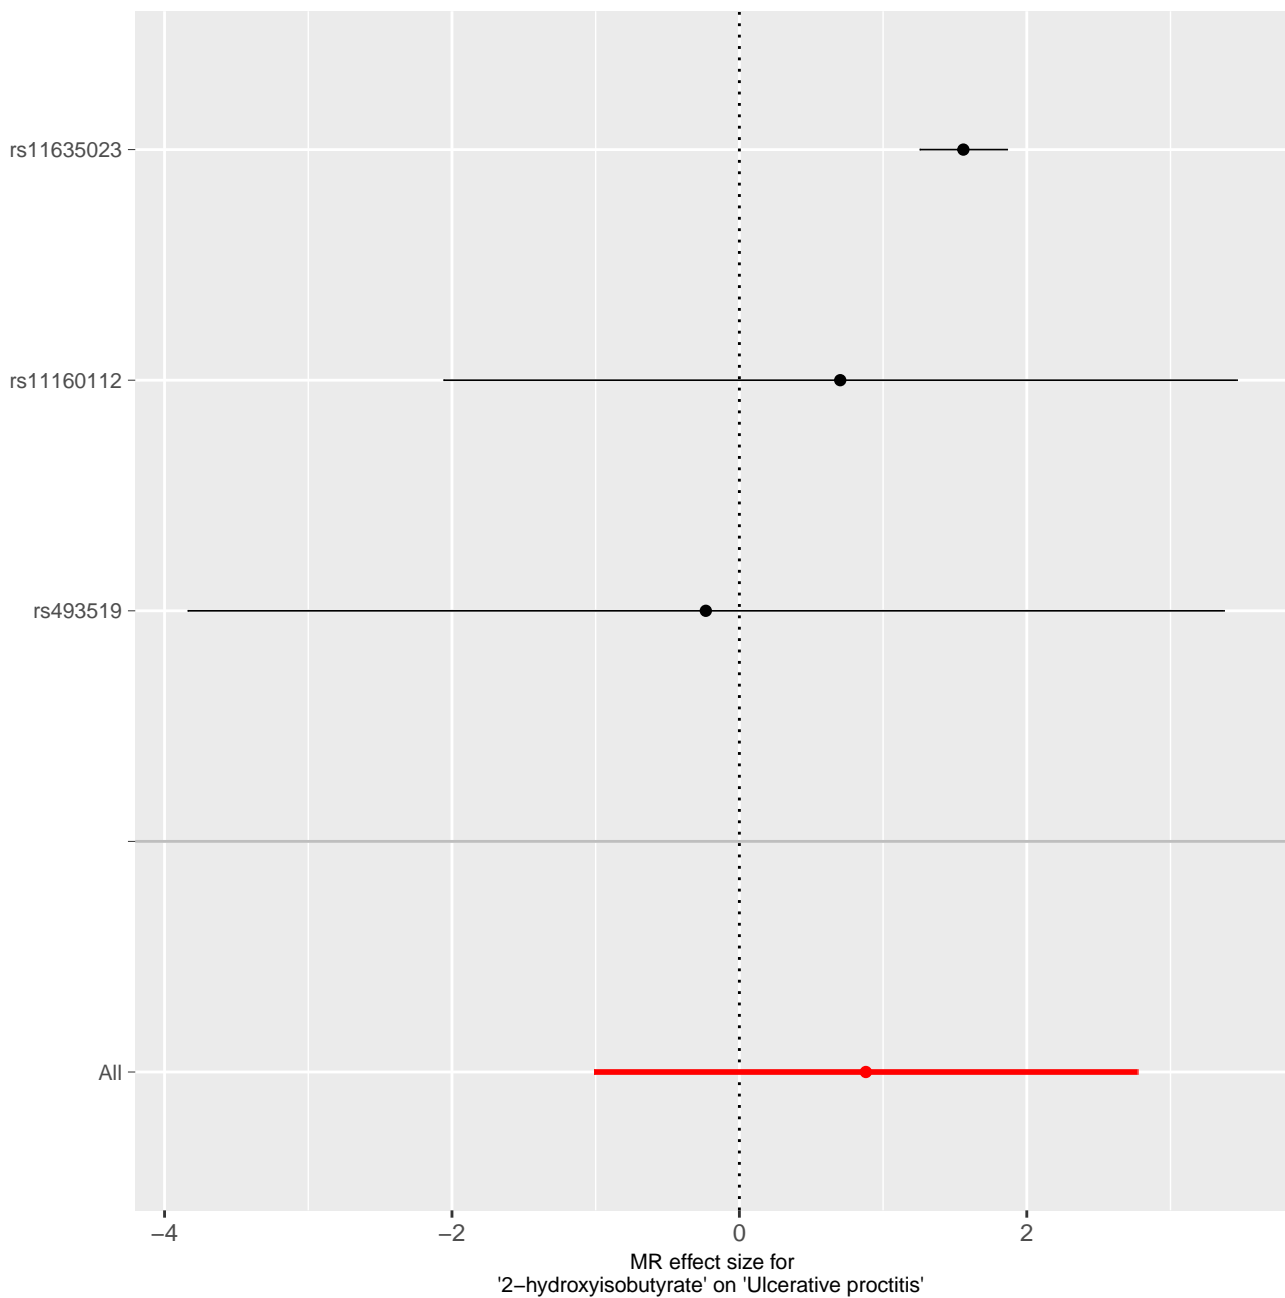

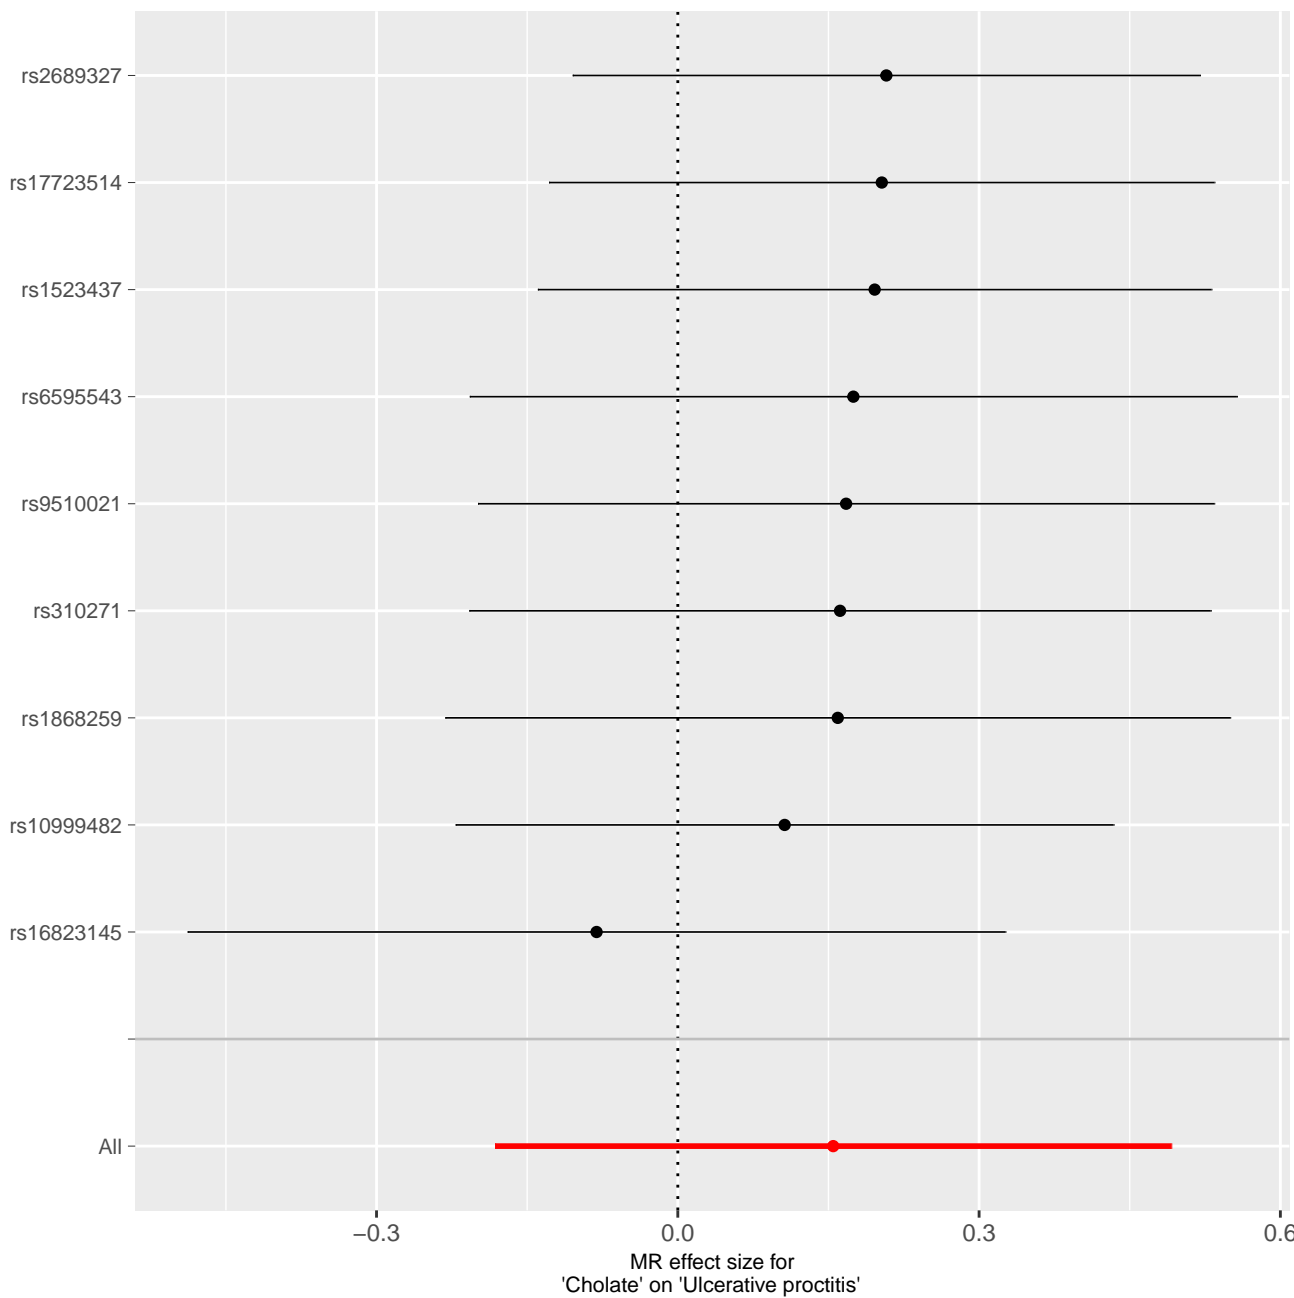

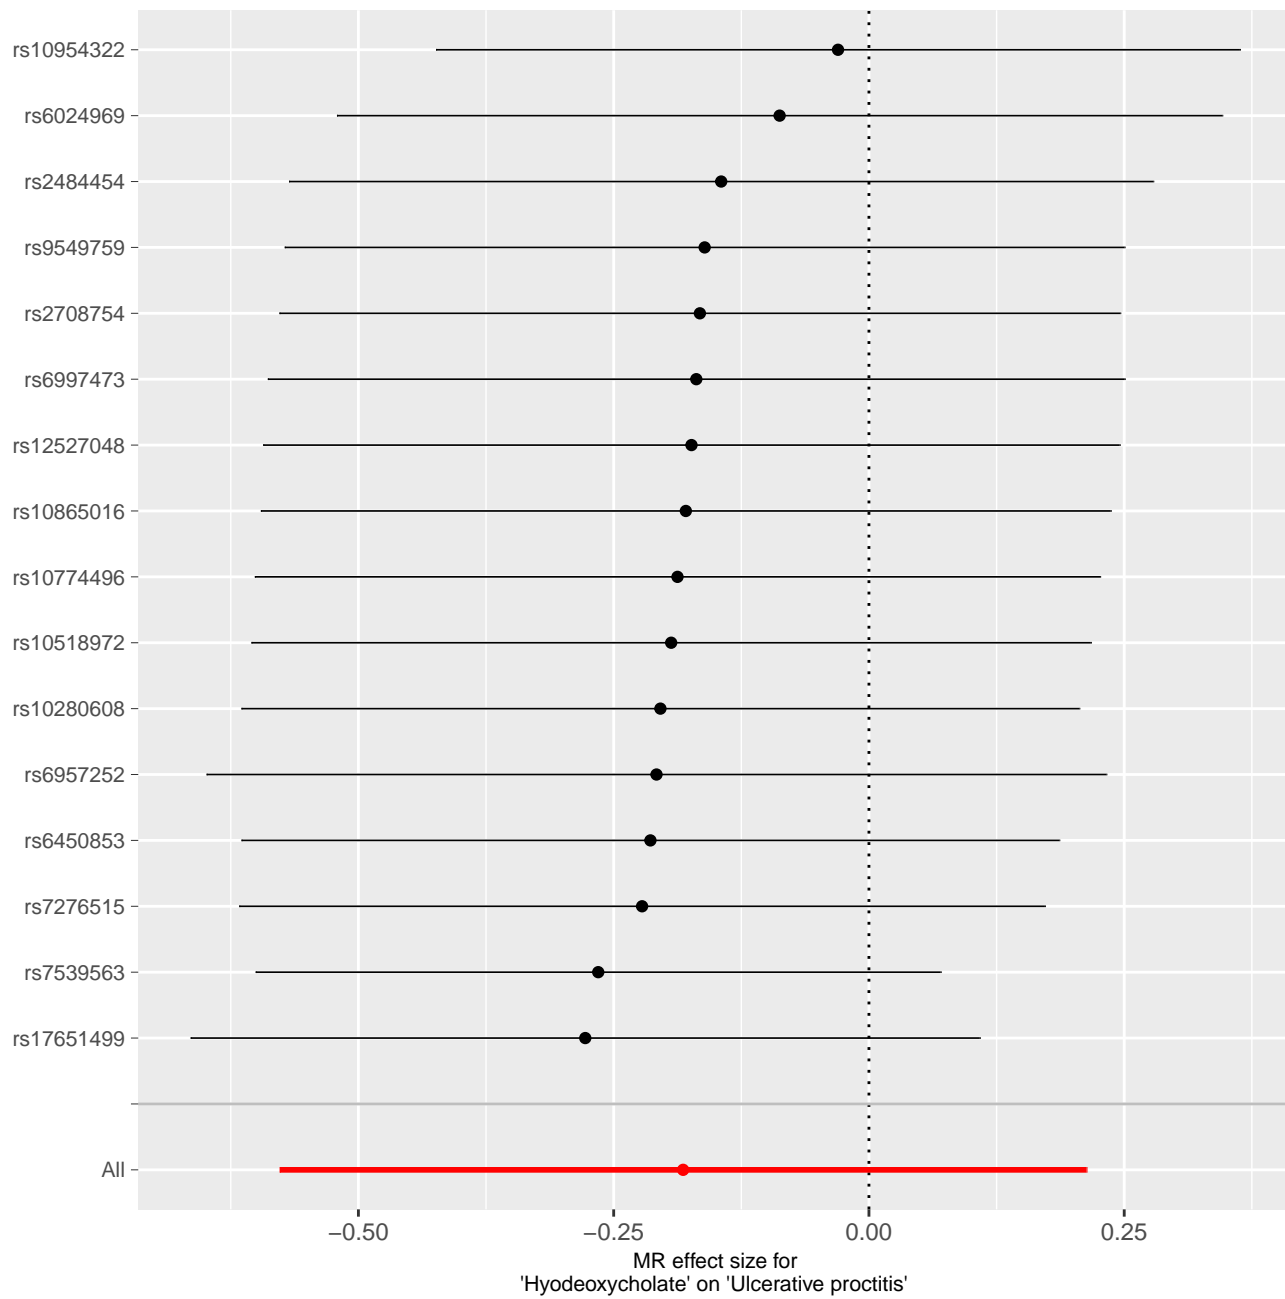

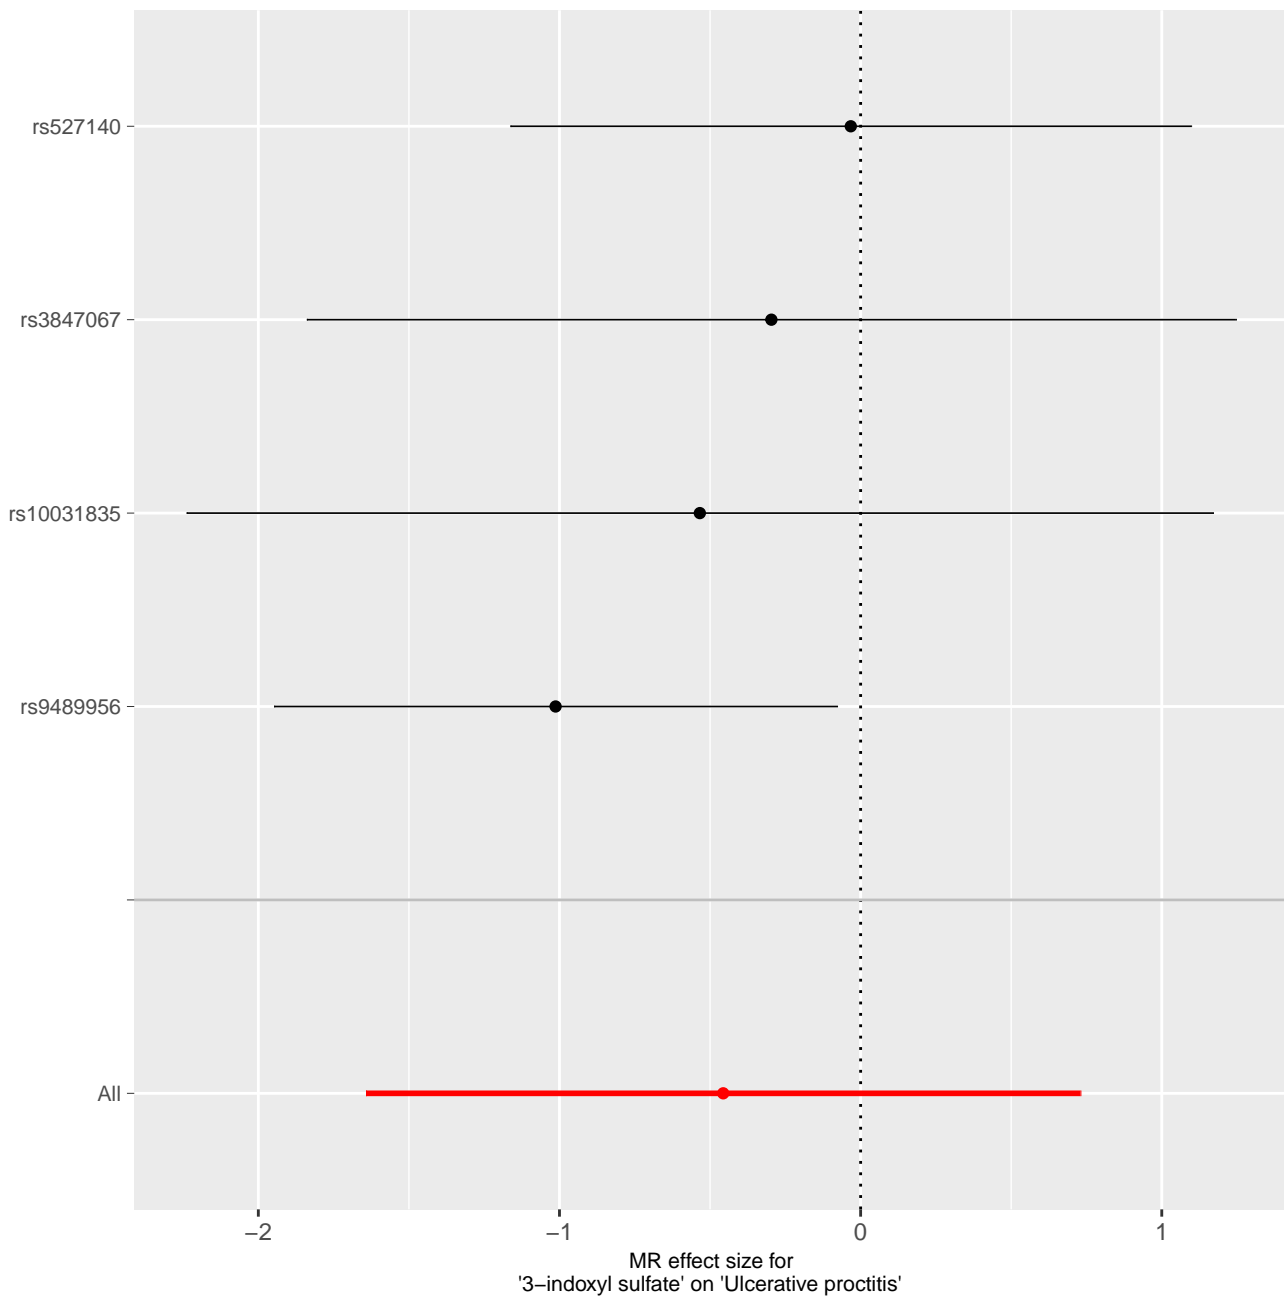

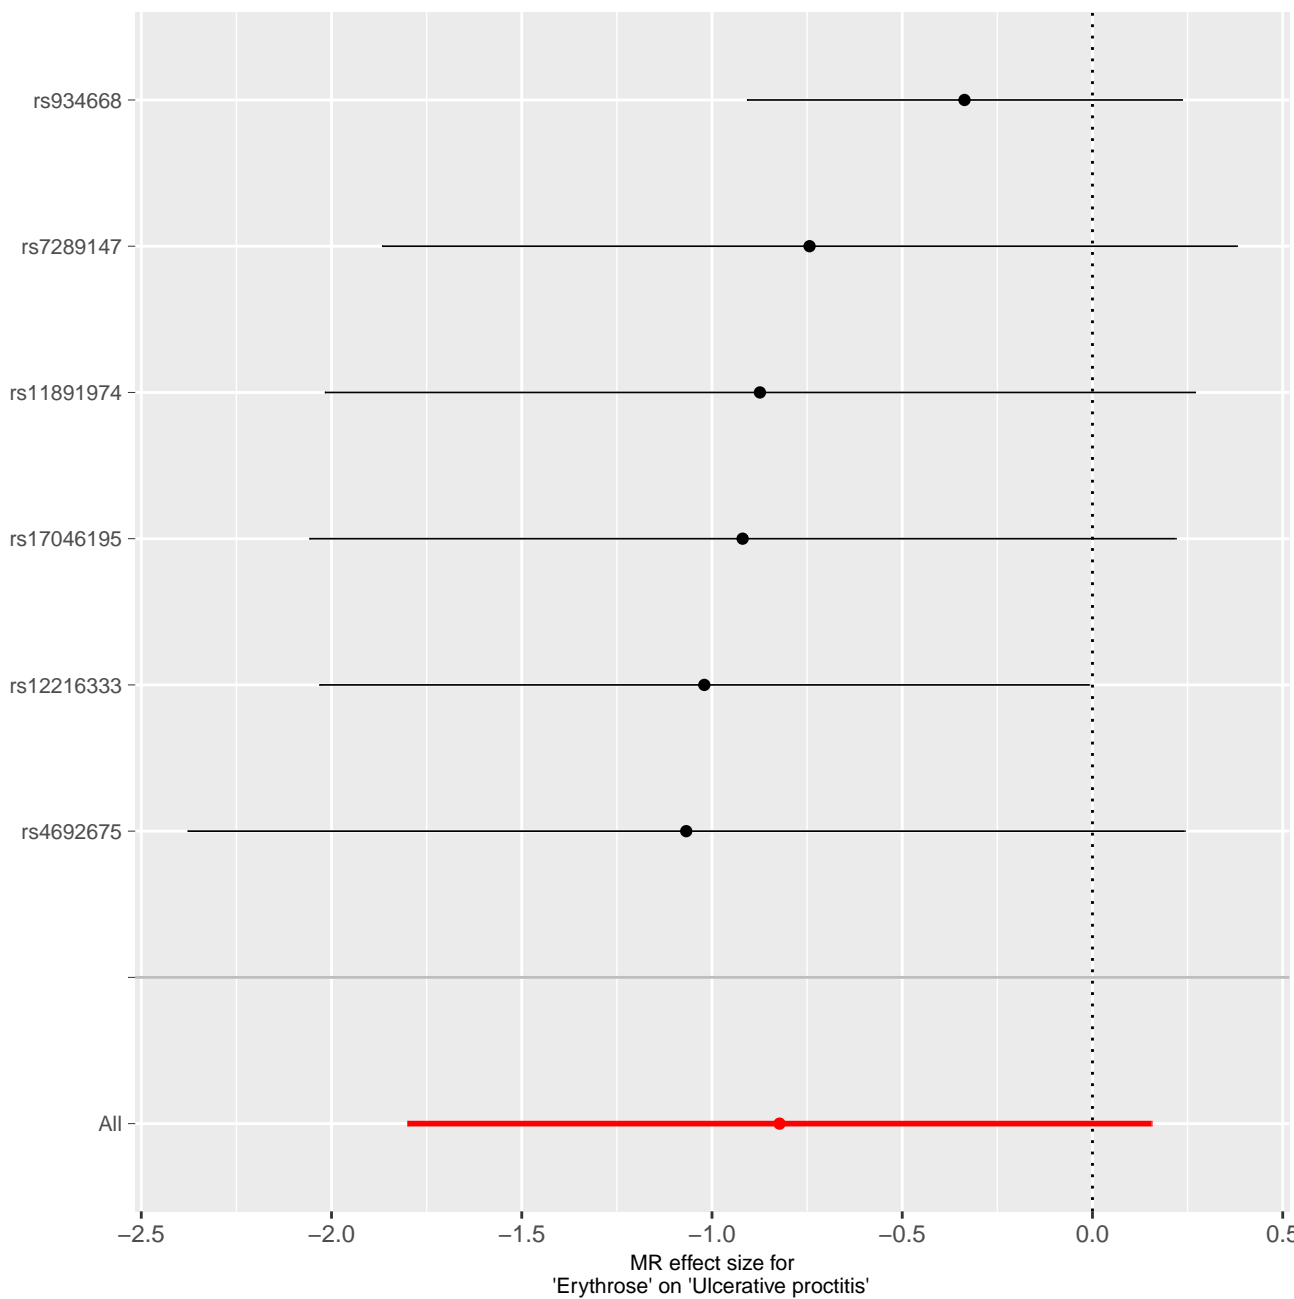

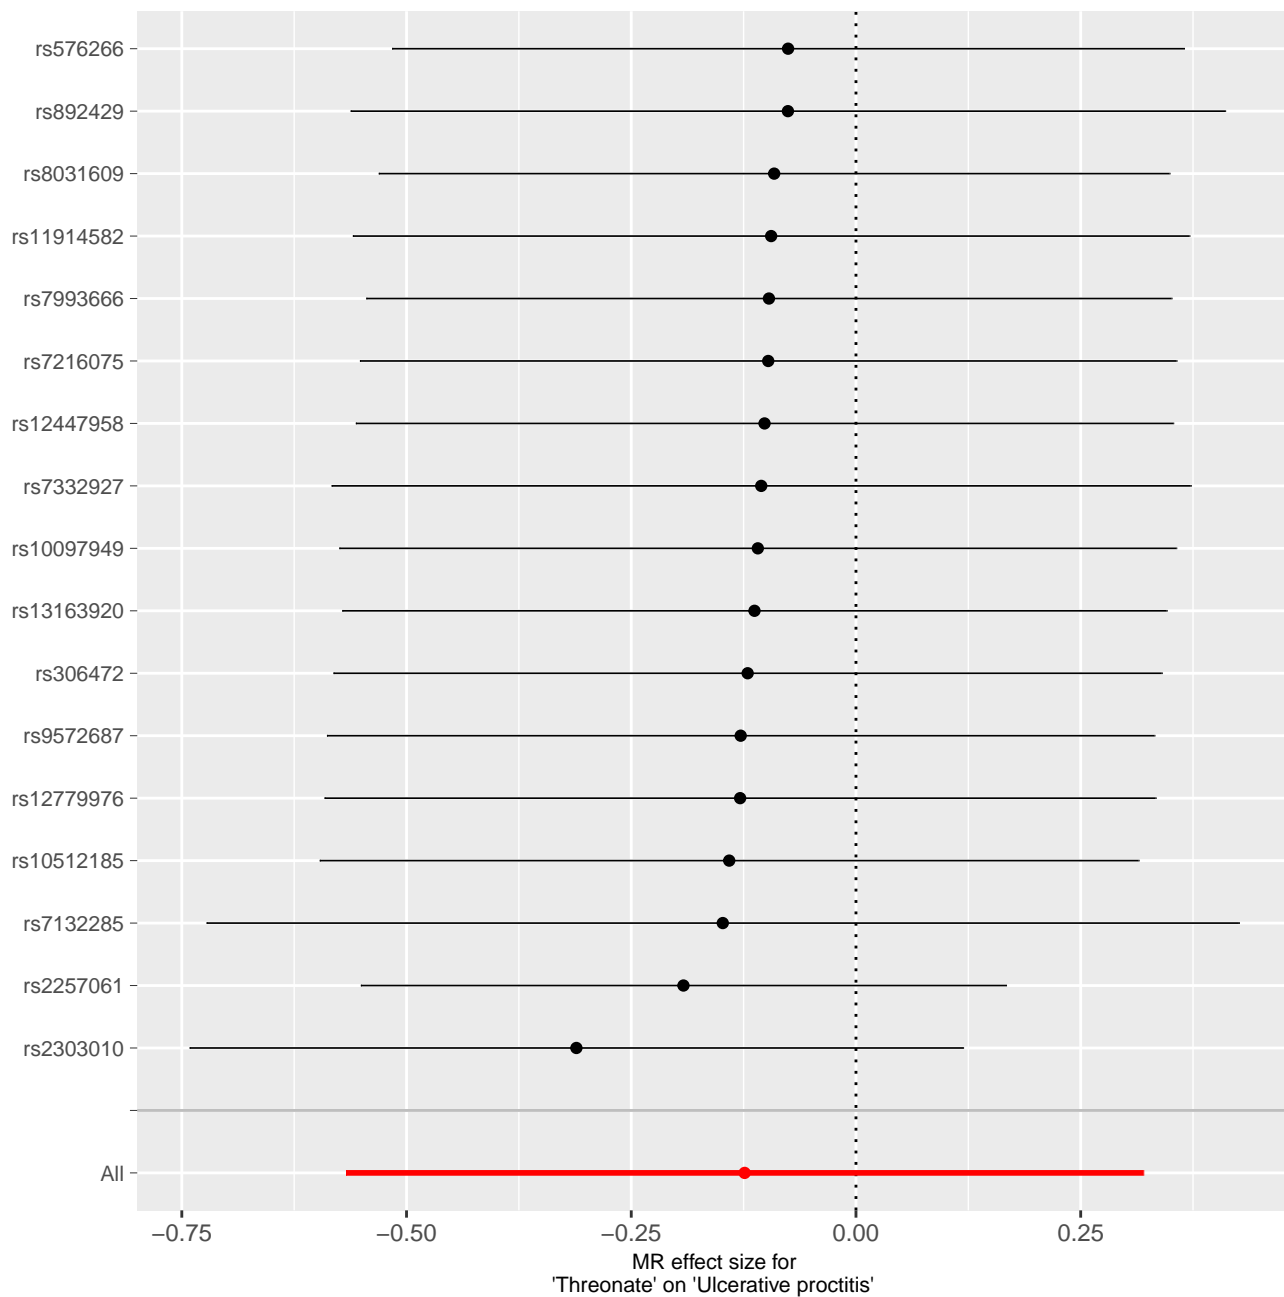

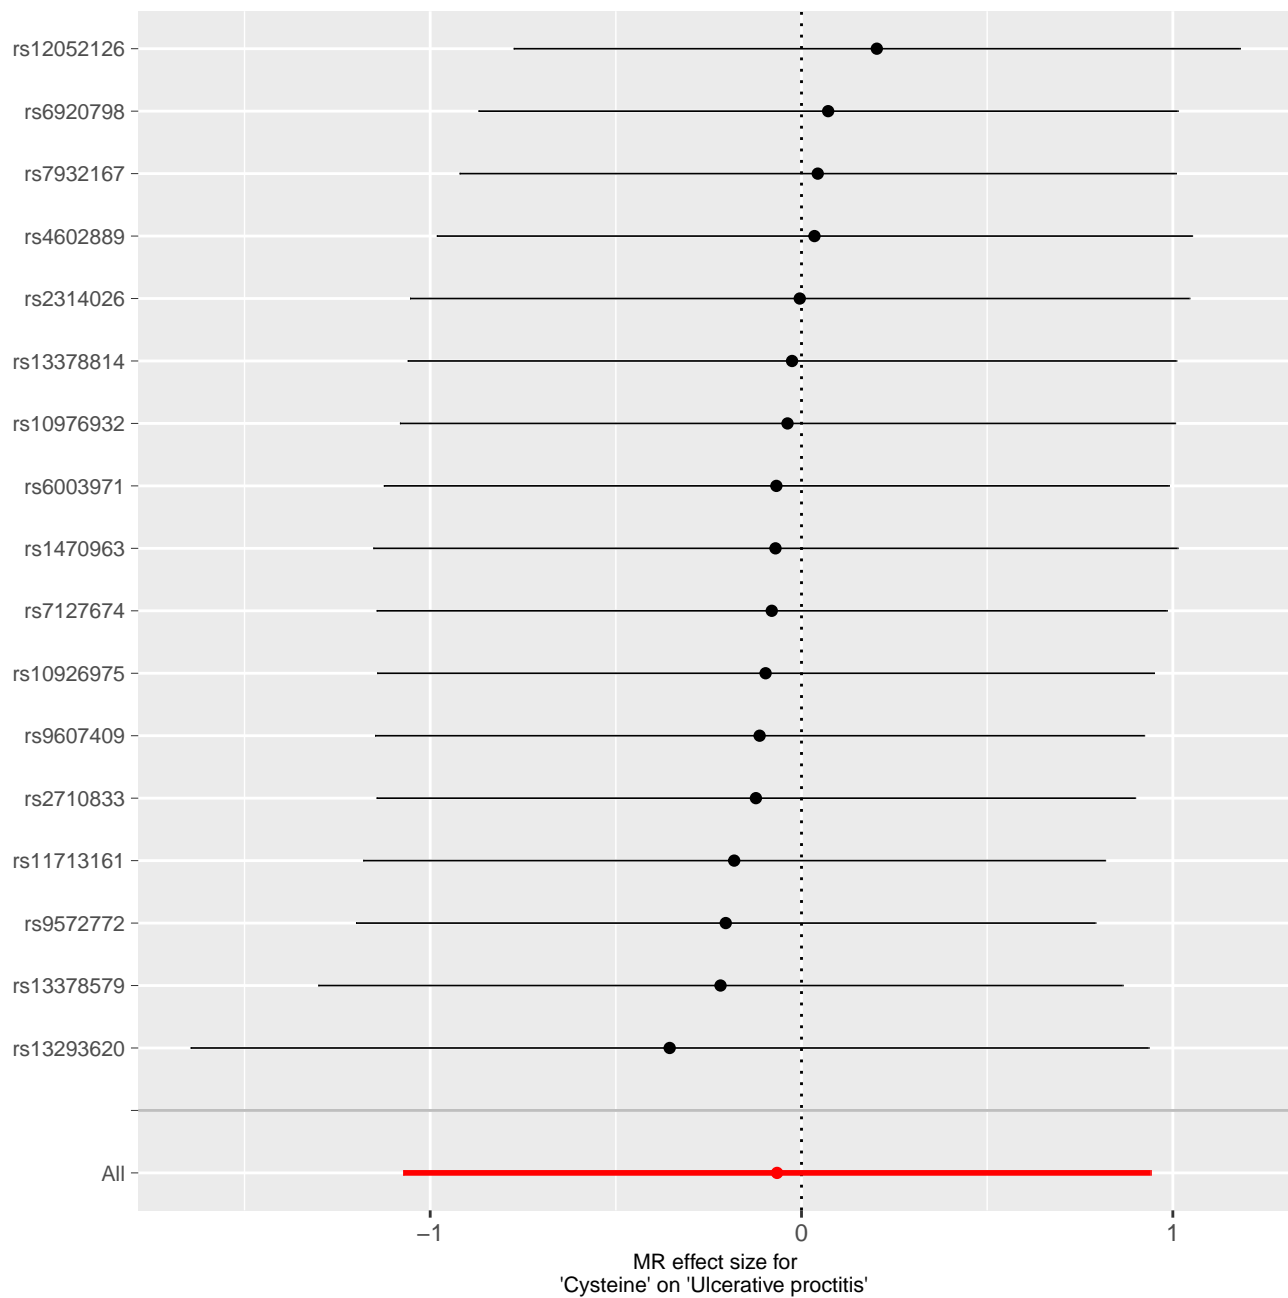



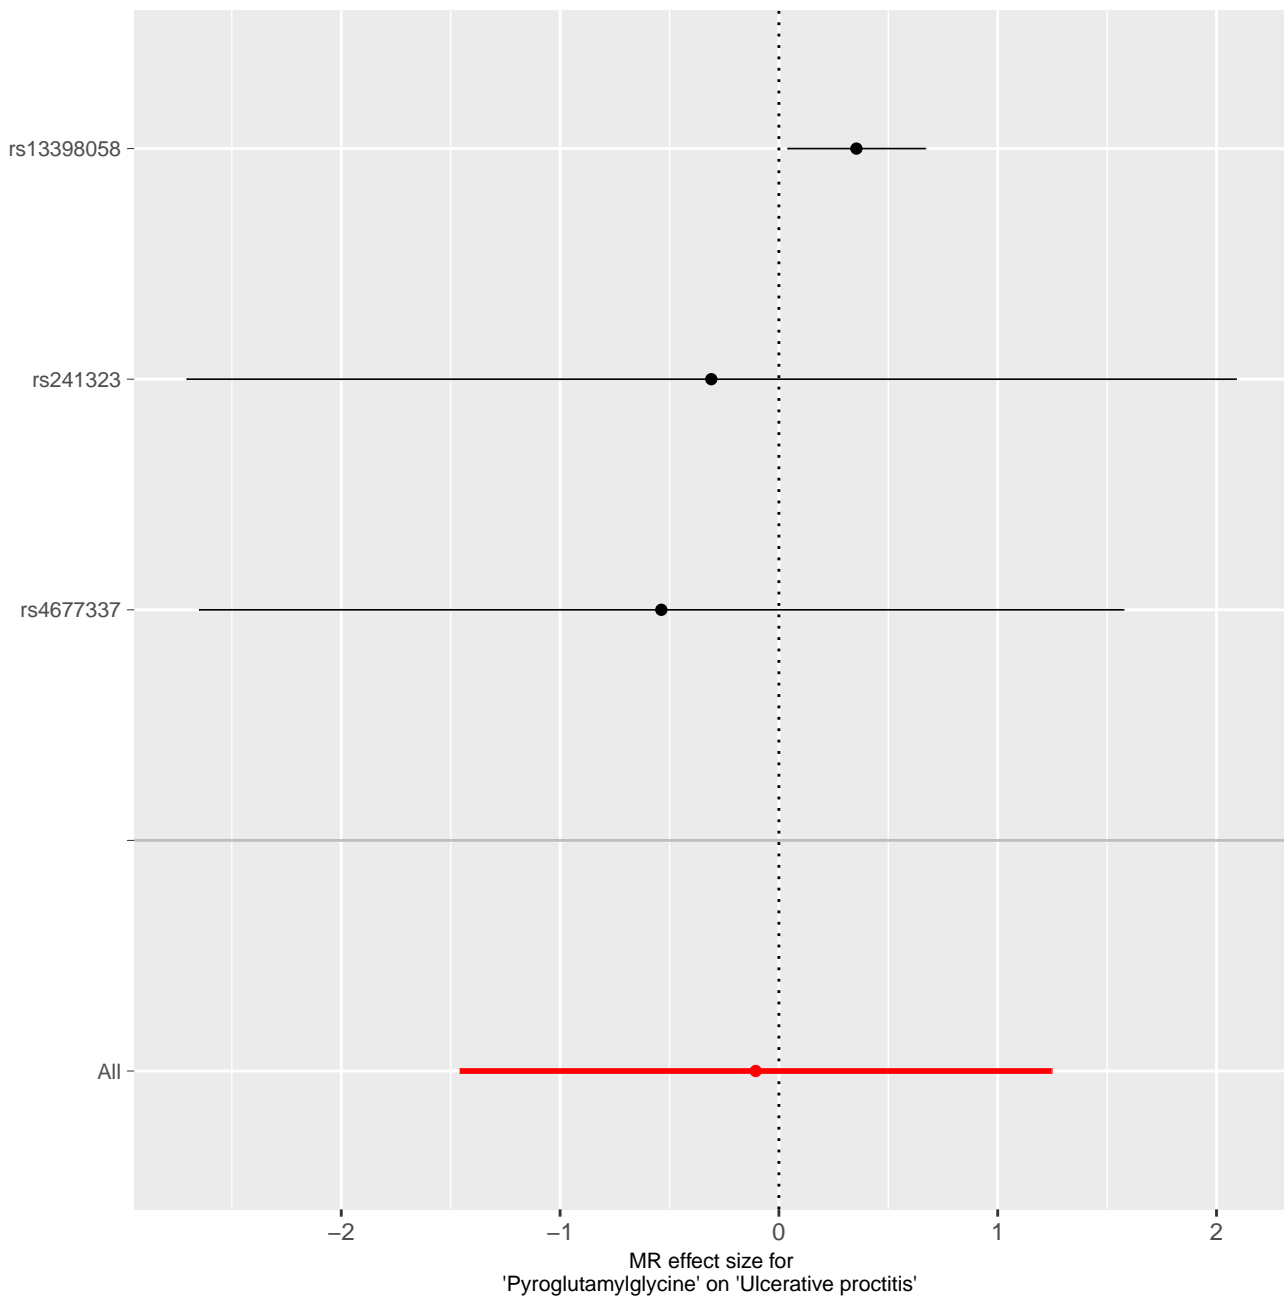

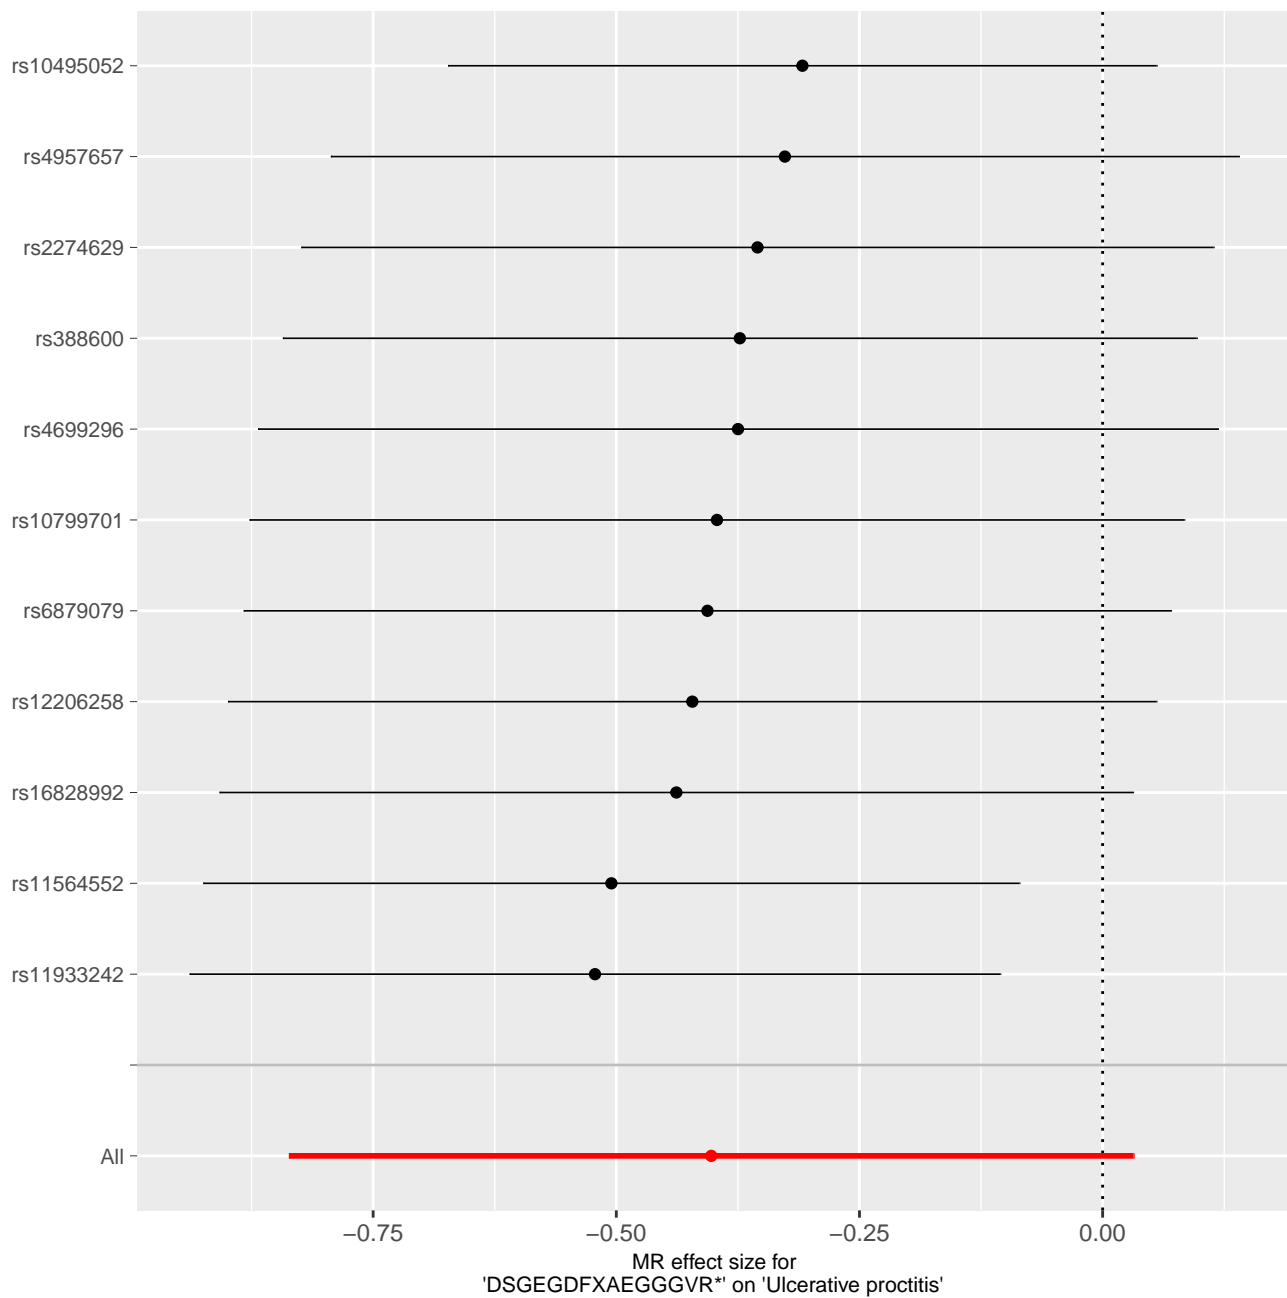

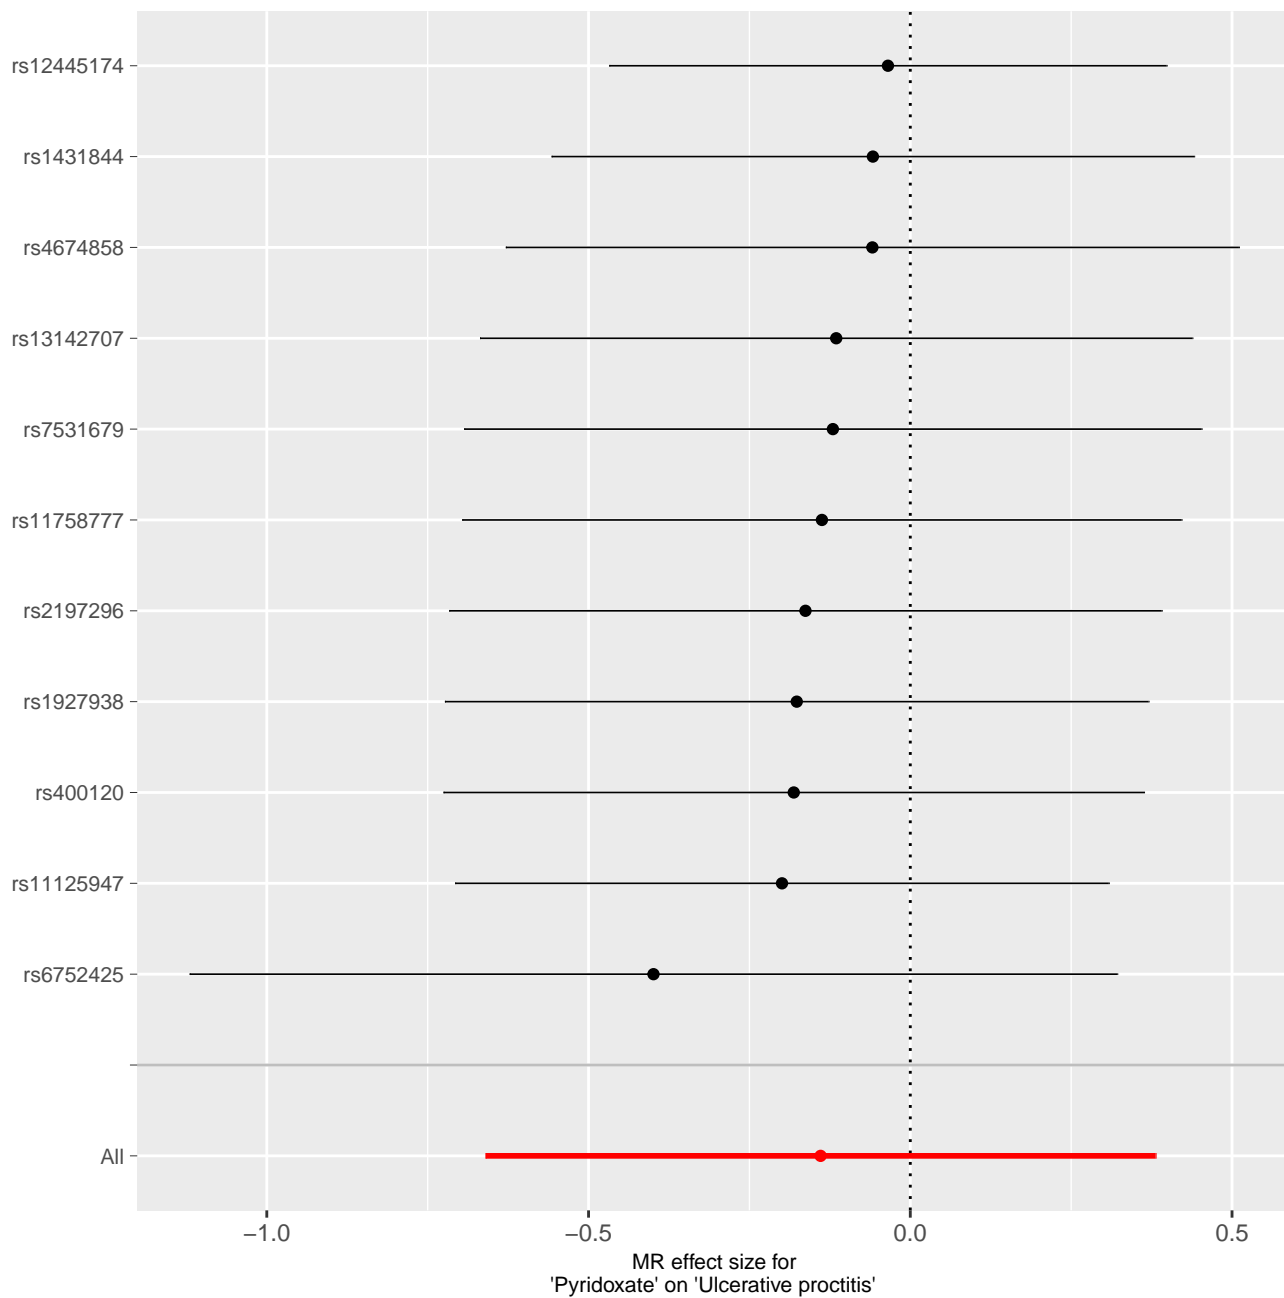

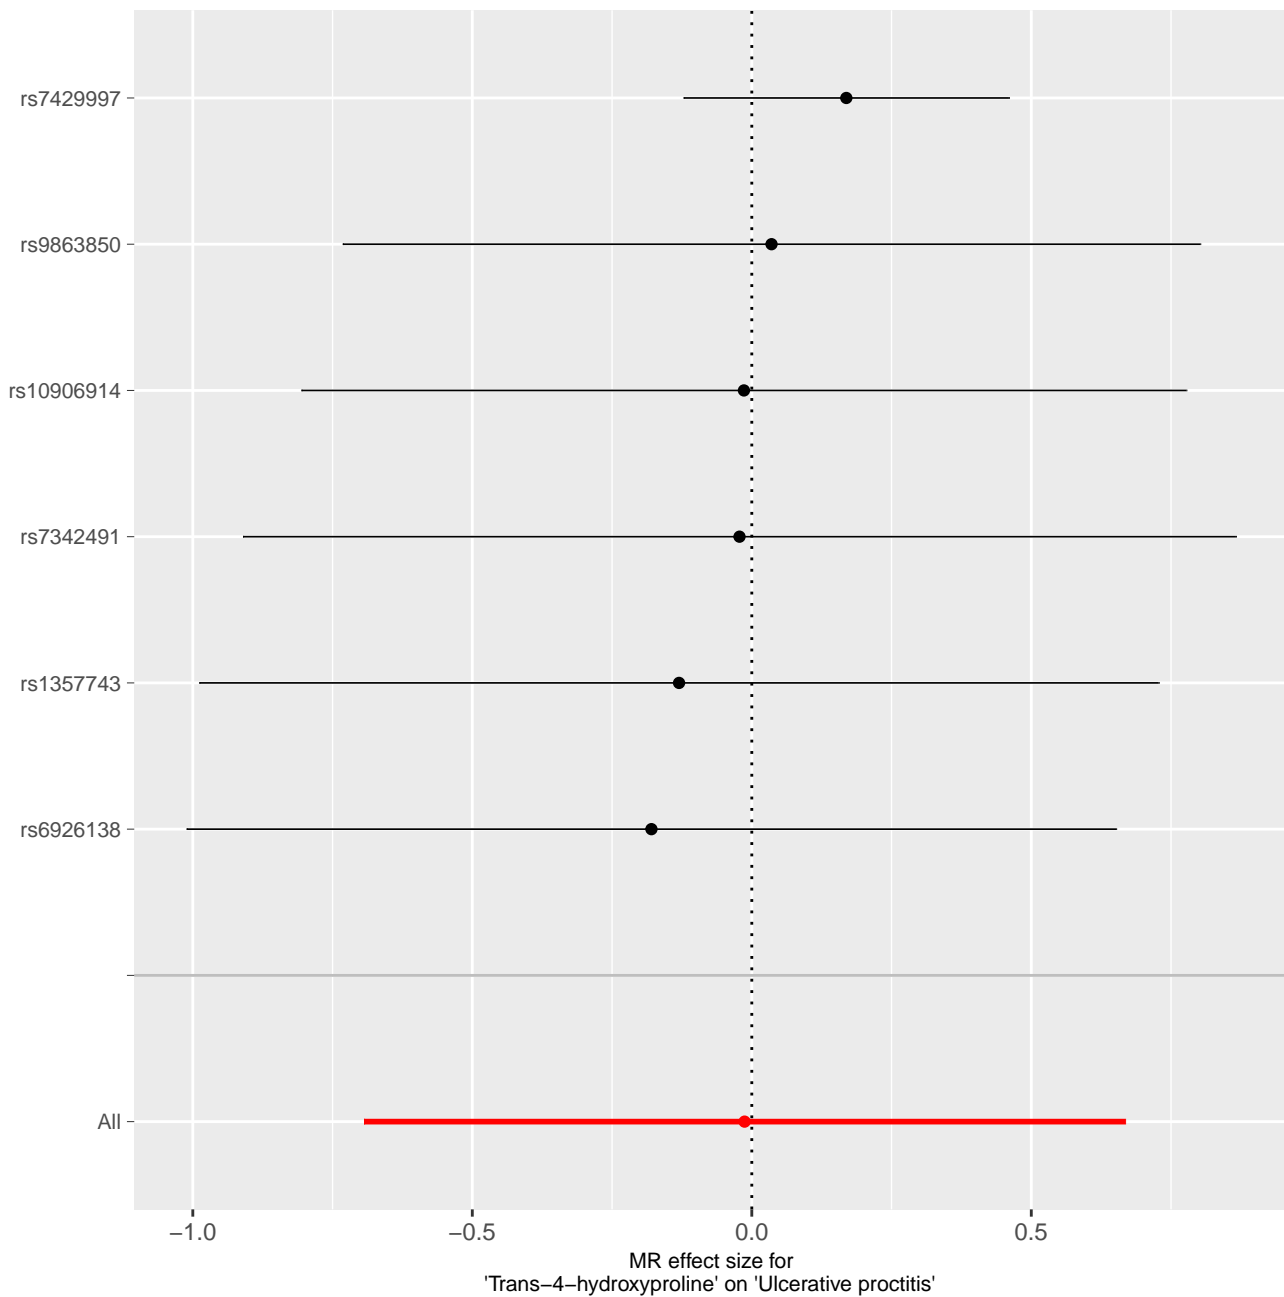

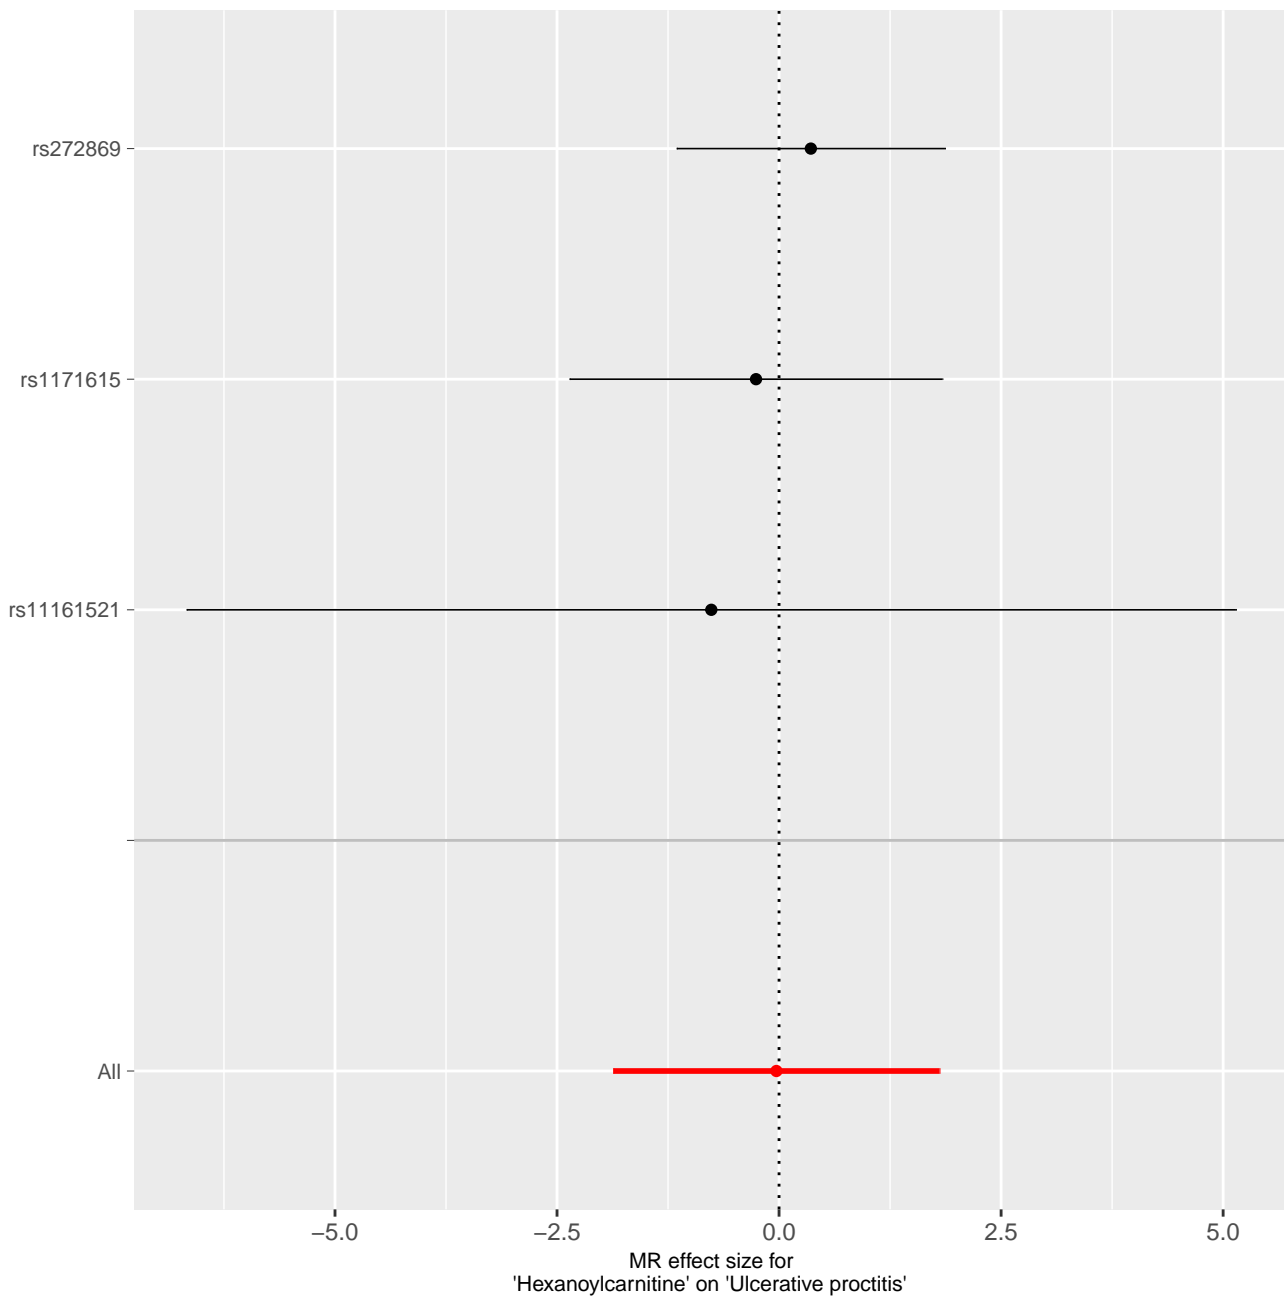

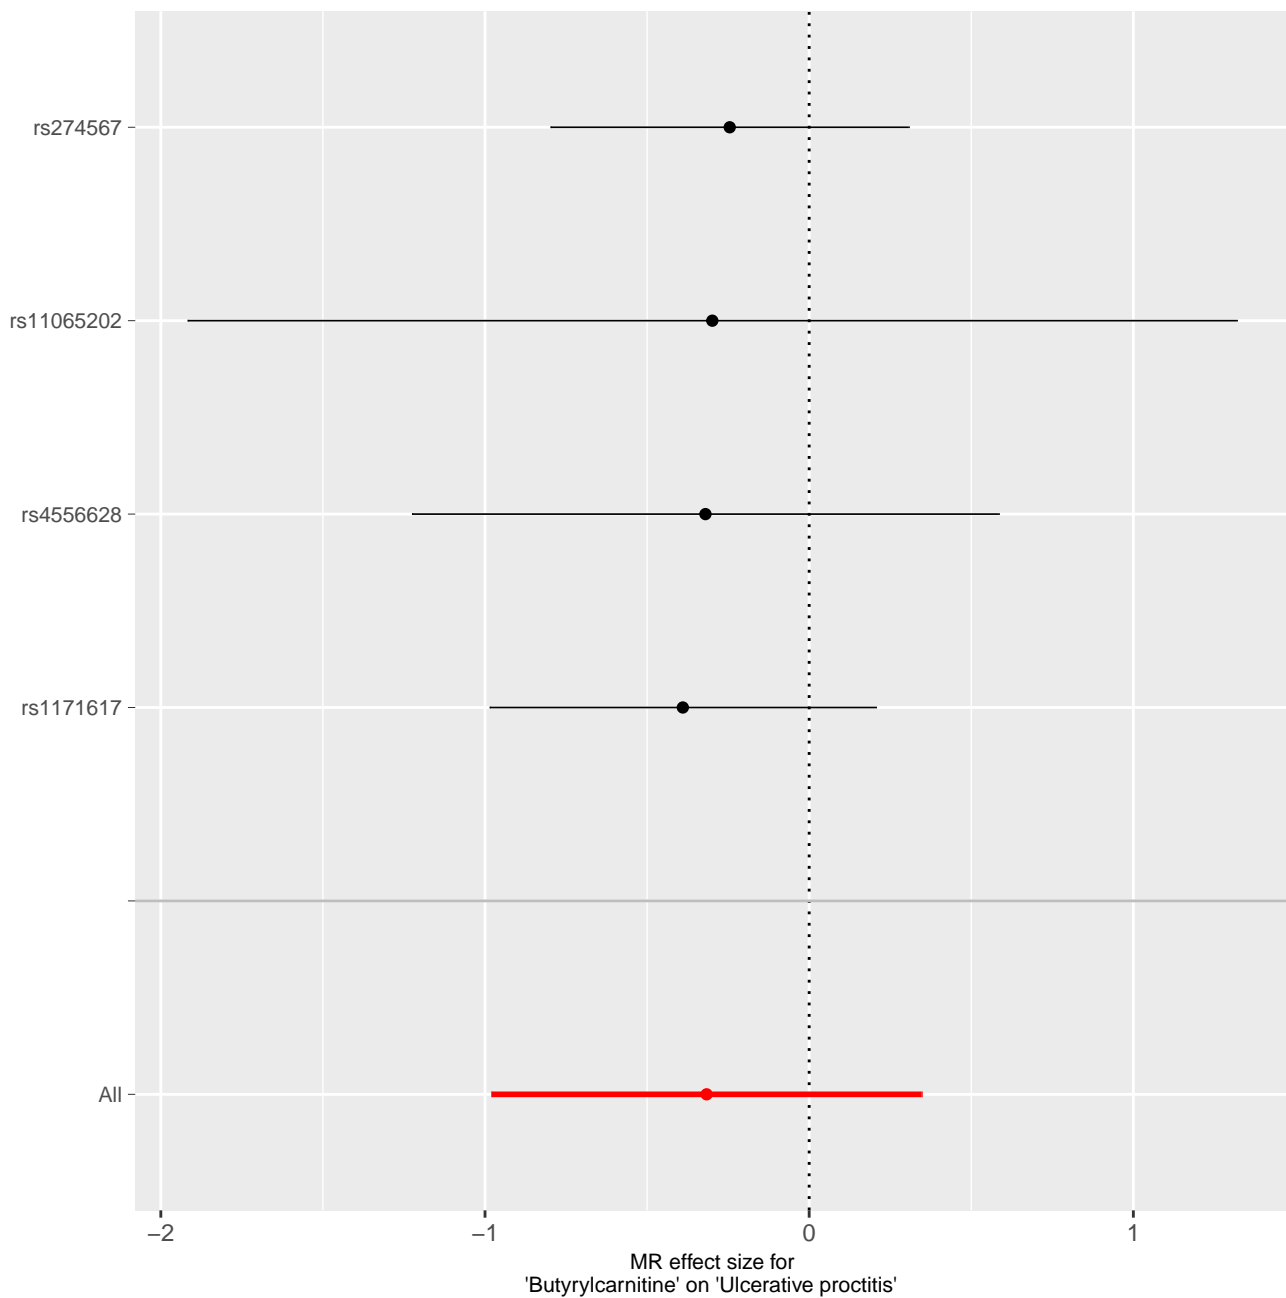

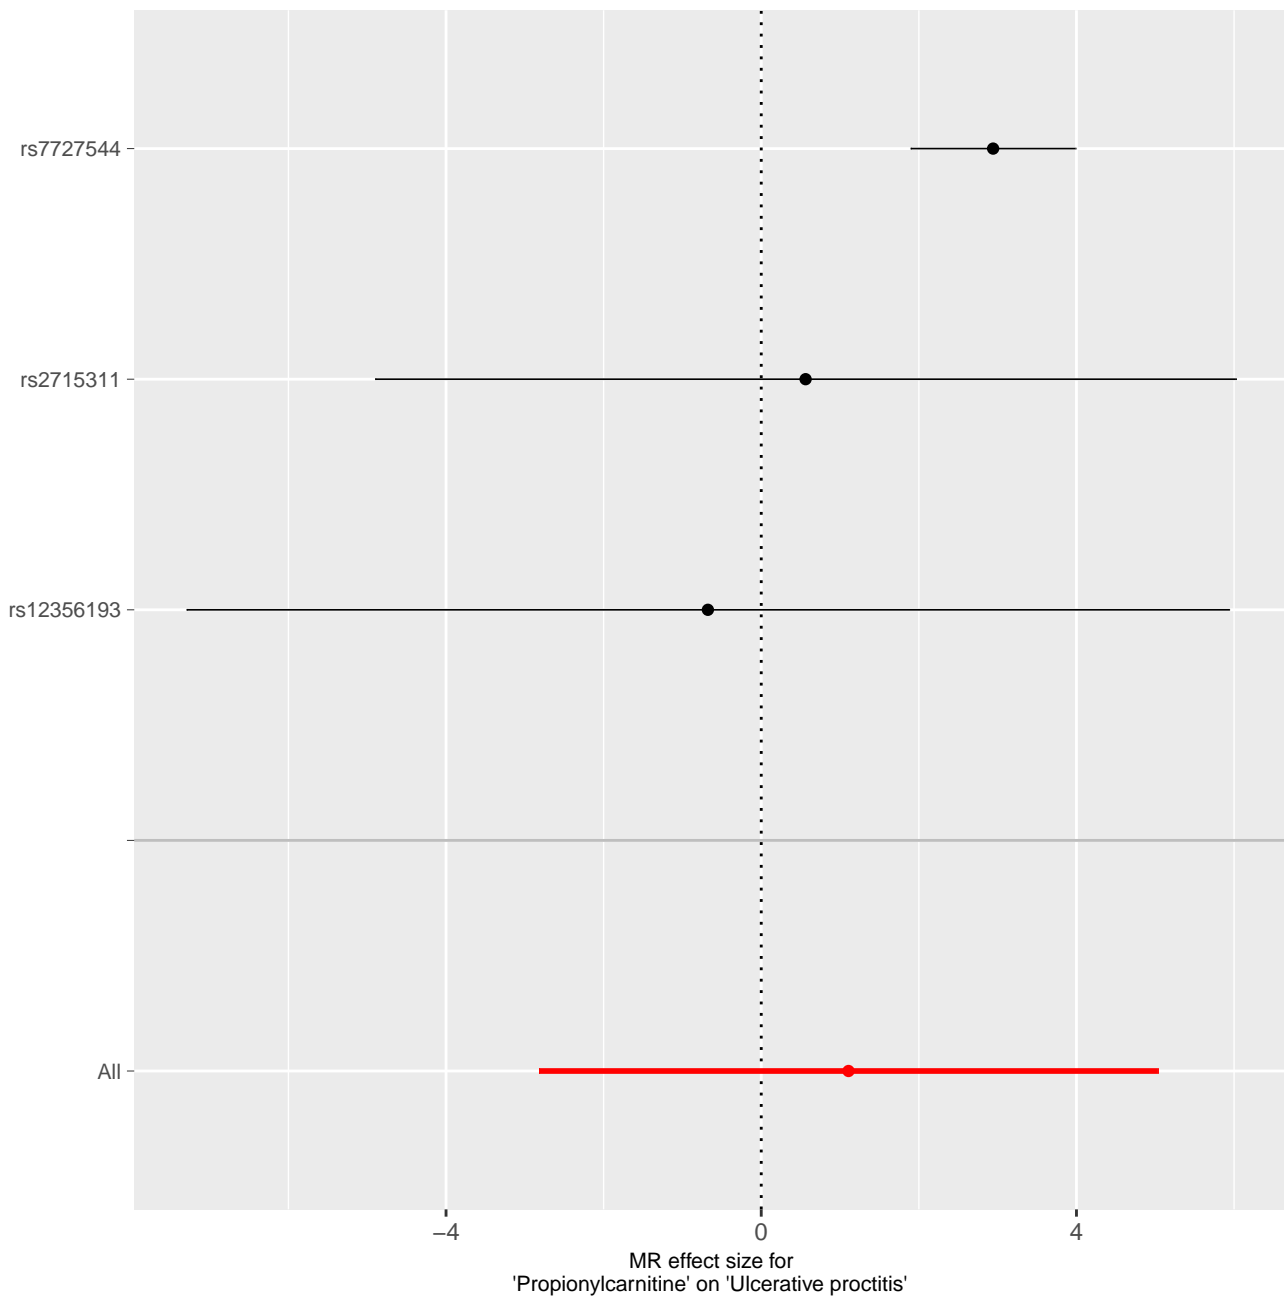

Batch 2348 : Caproate (6:0) on Ulcerative proctitis

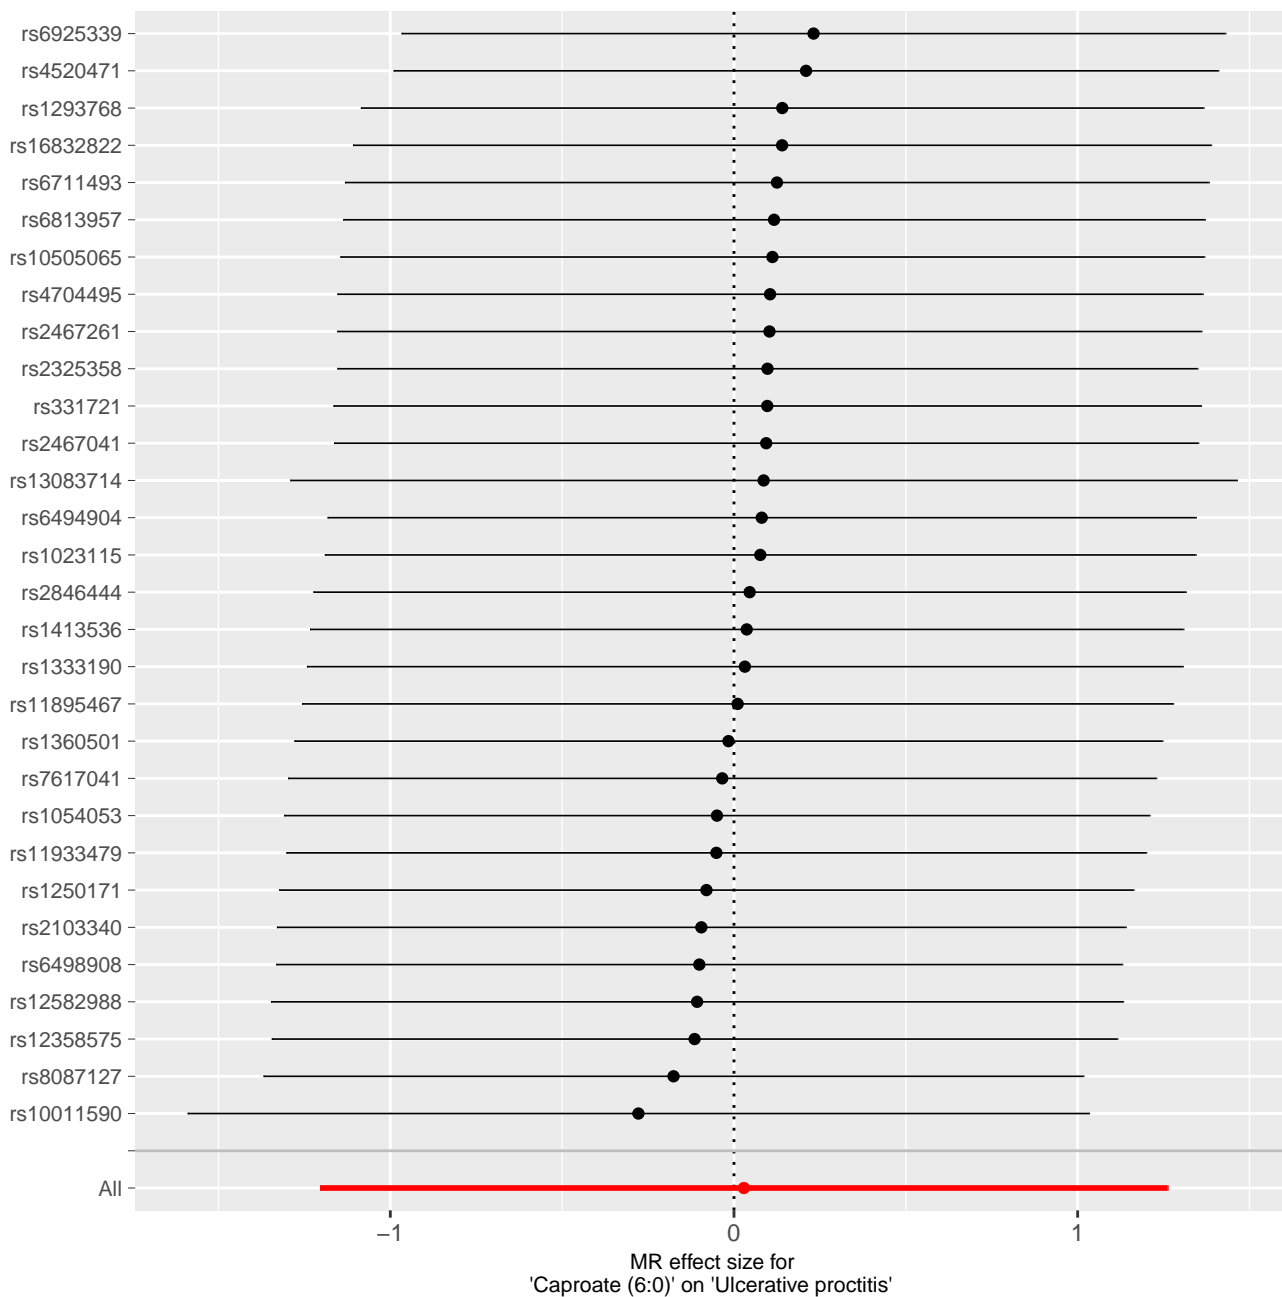



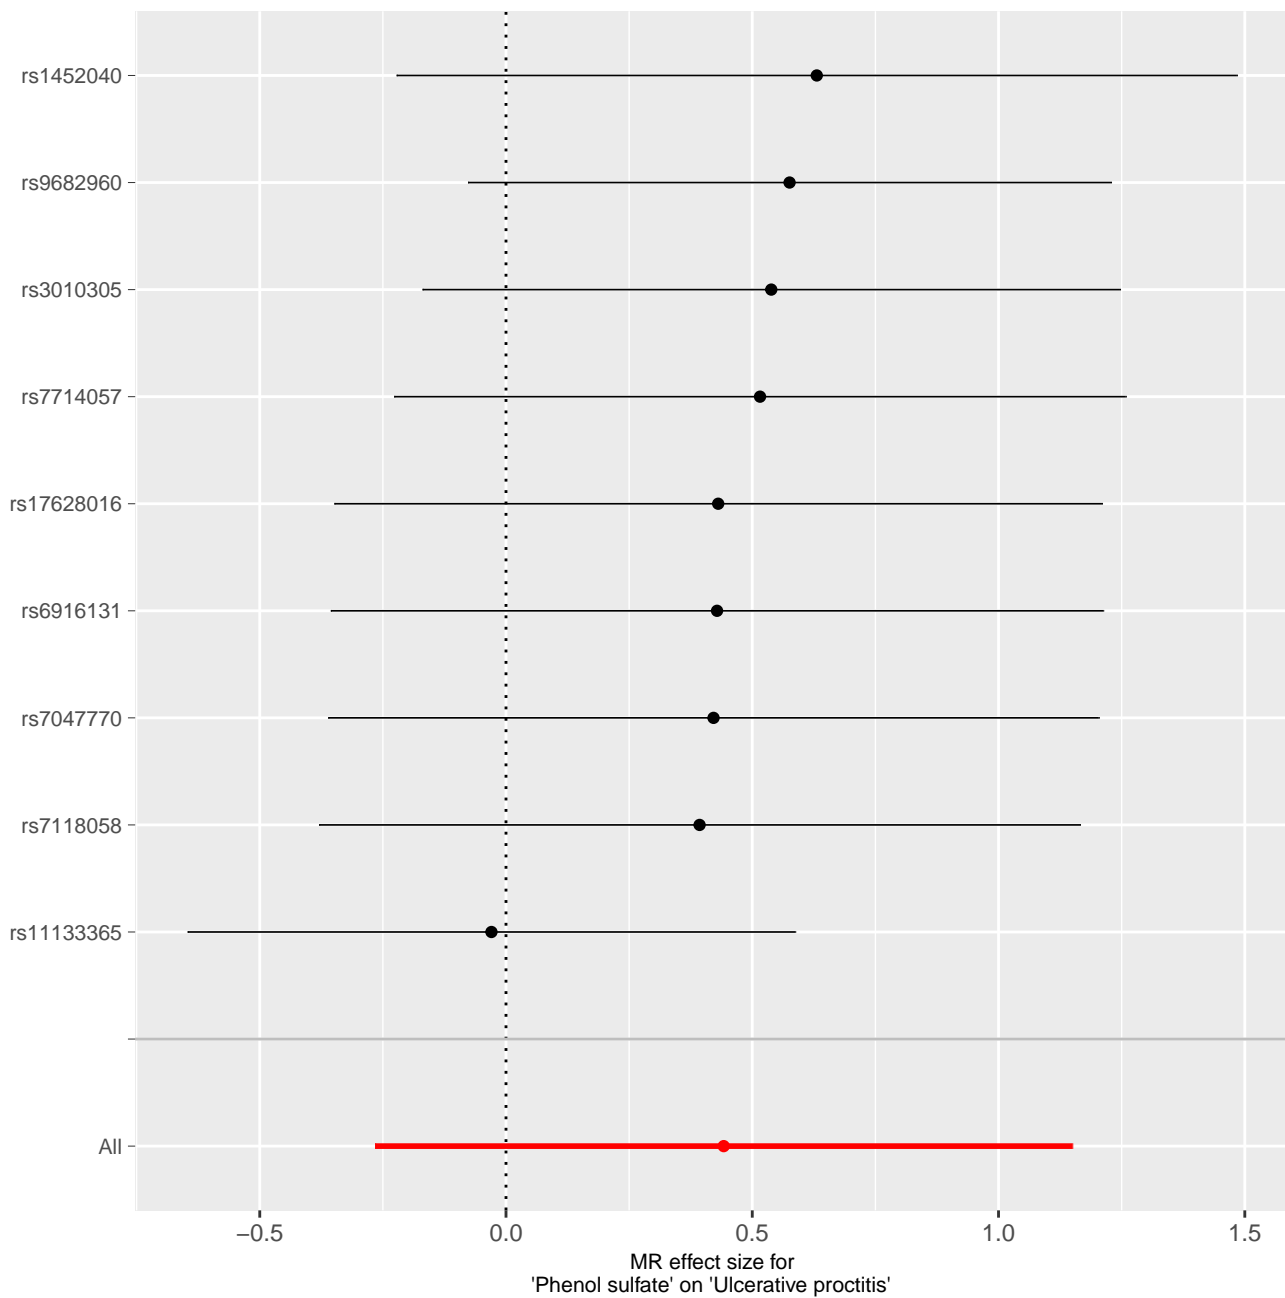

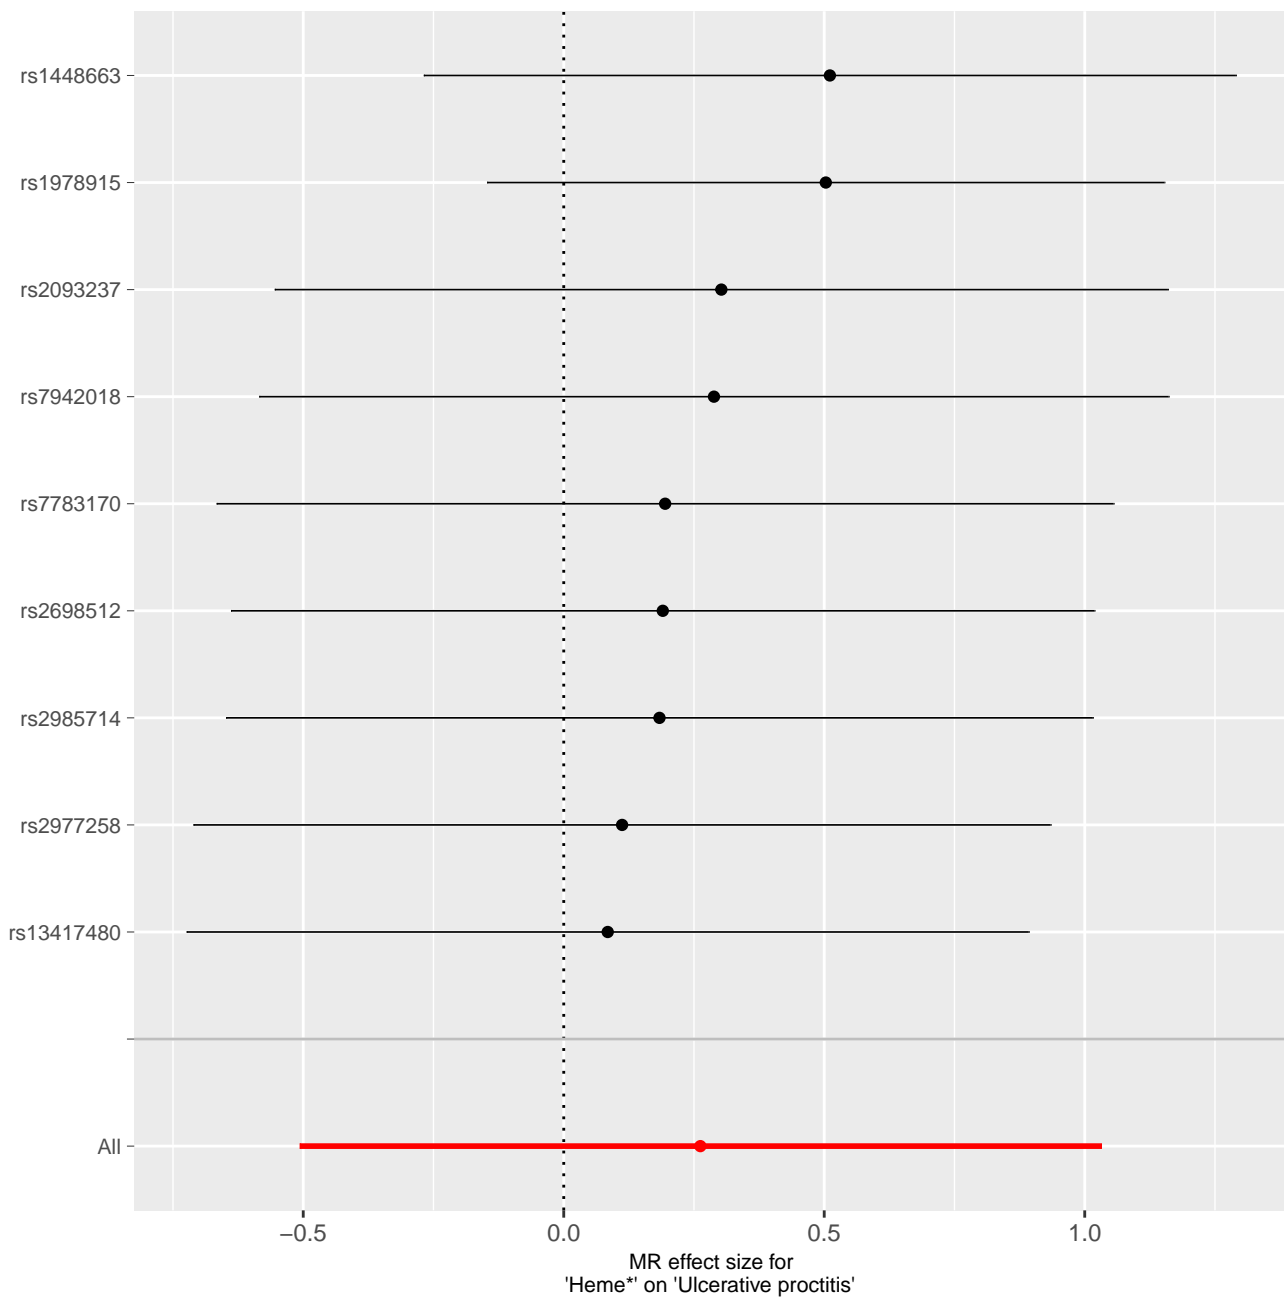

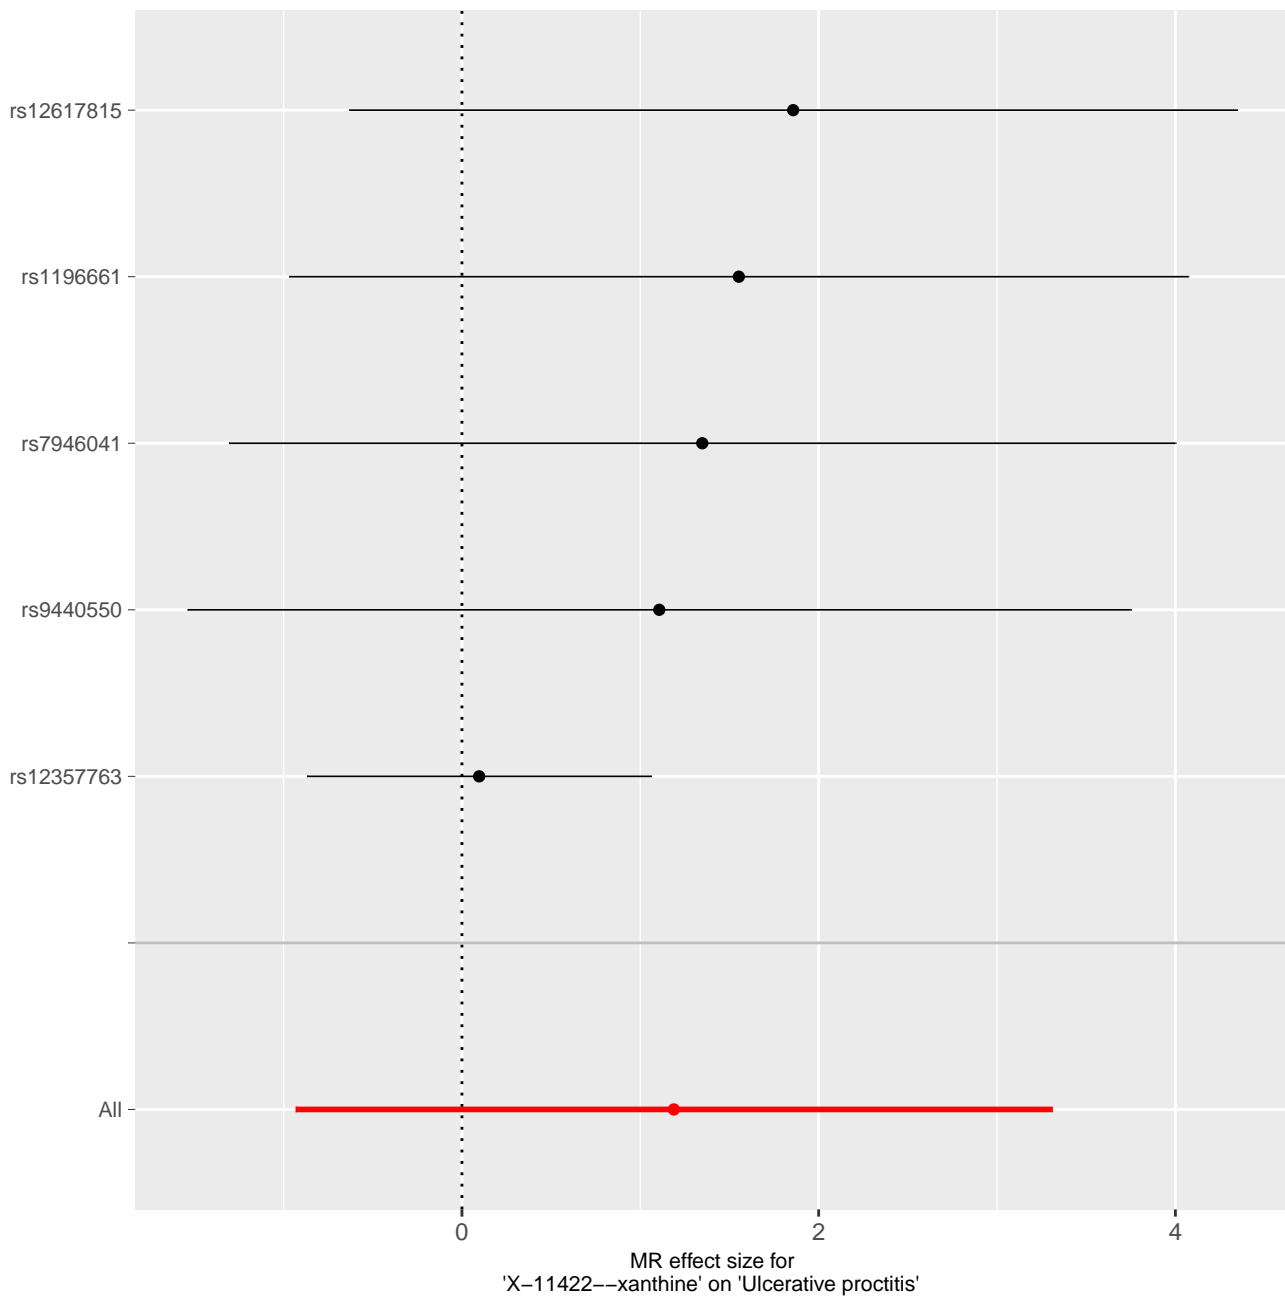

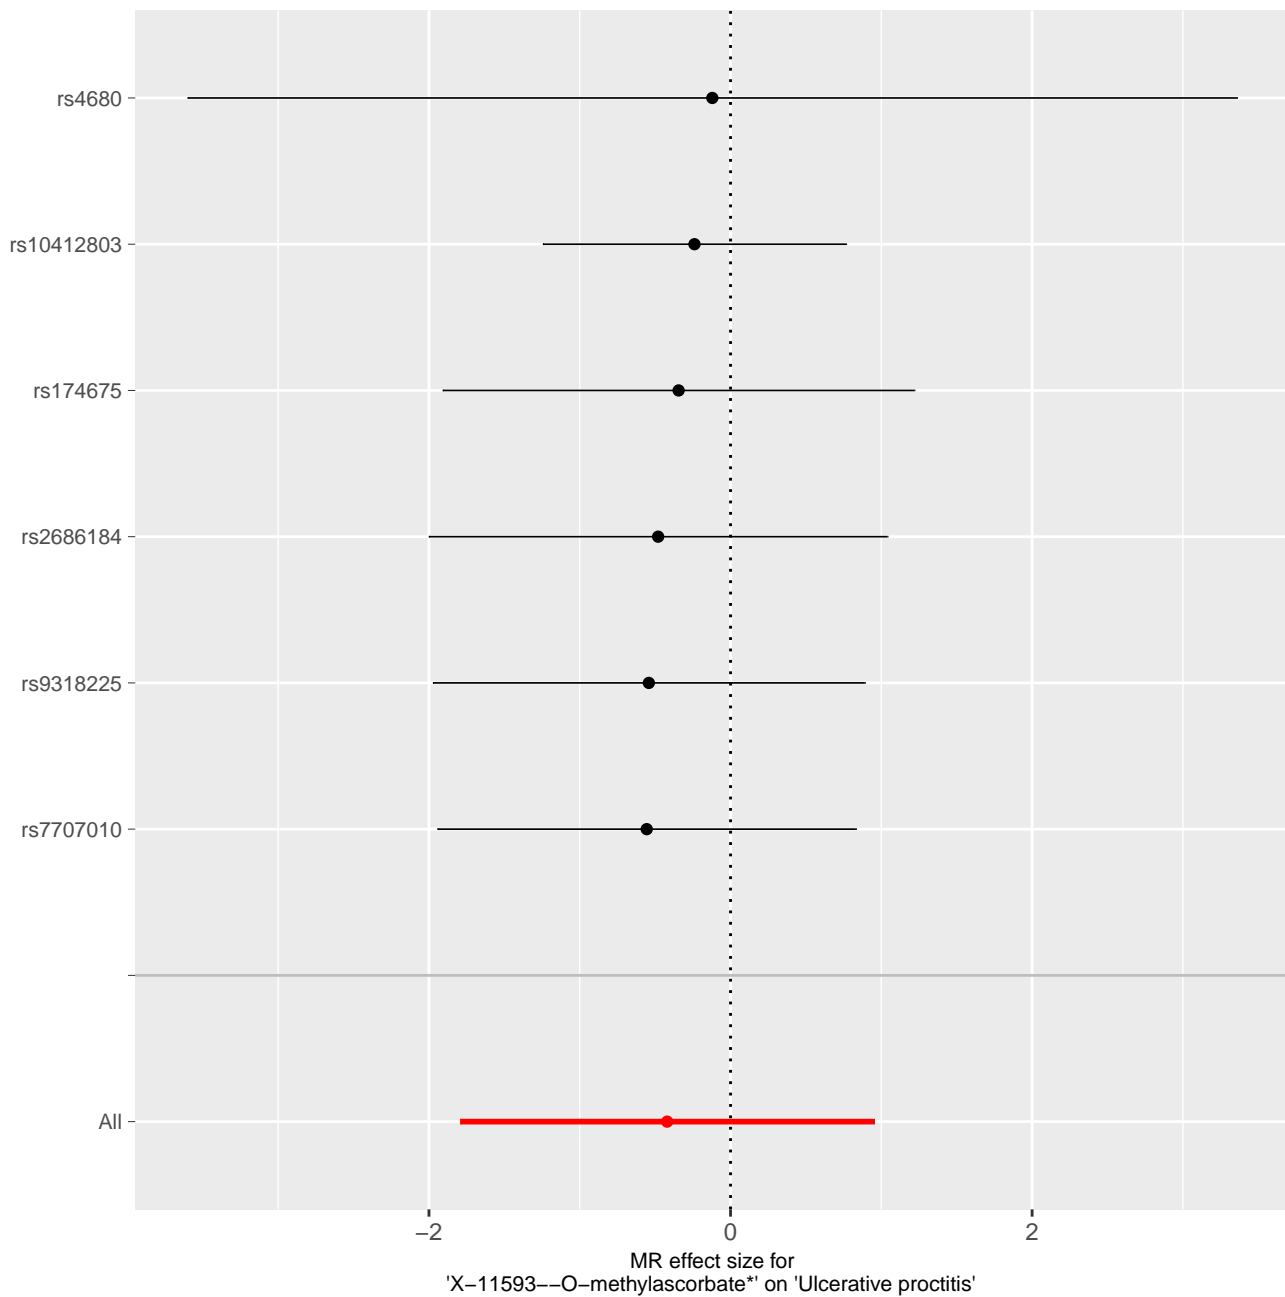

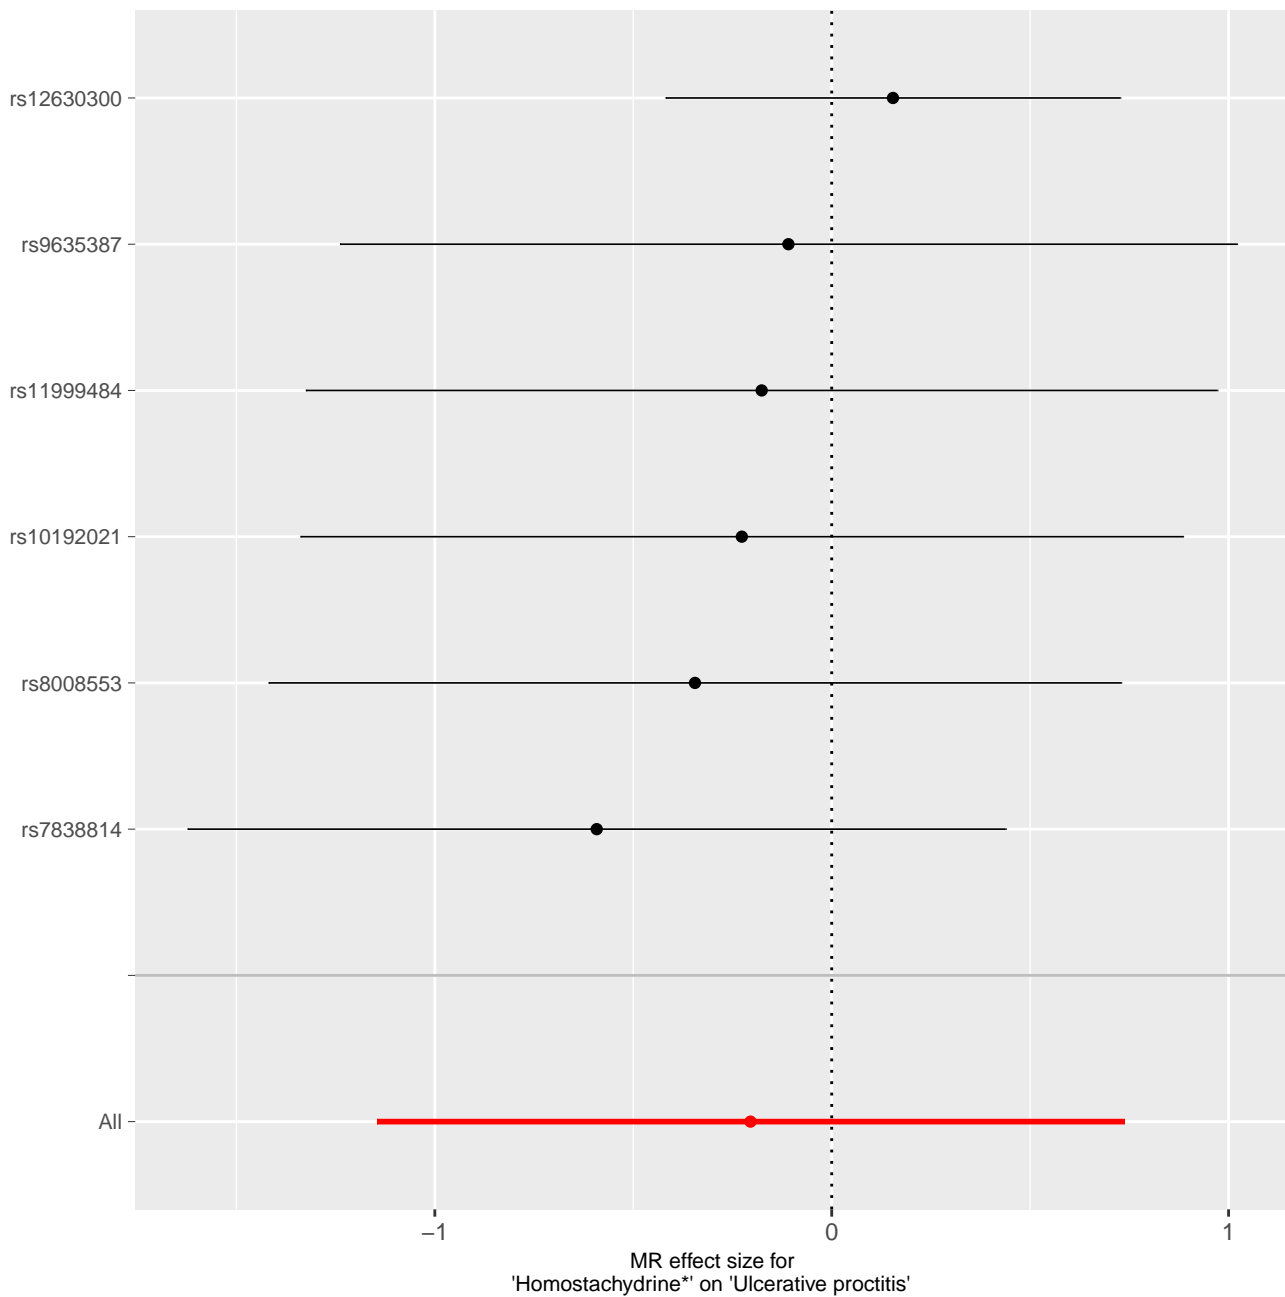

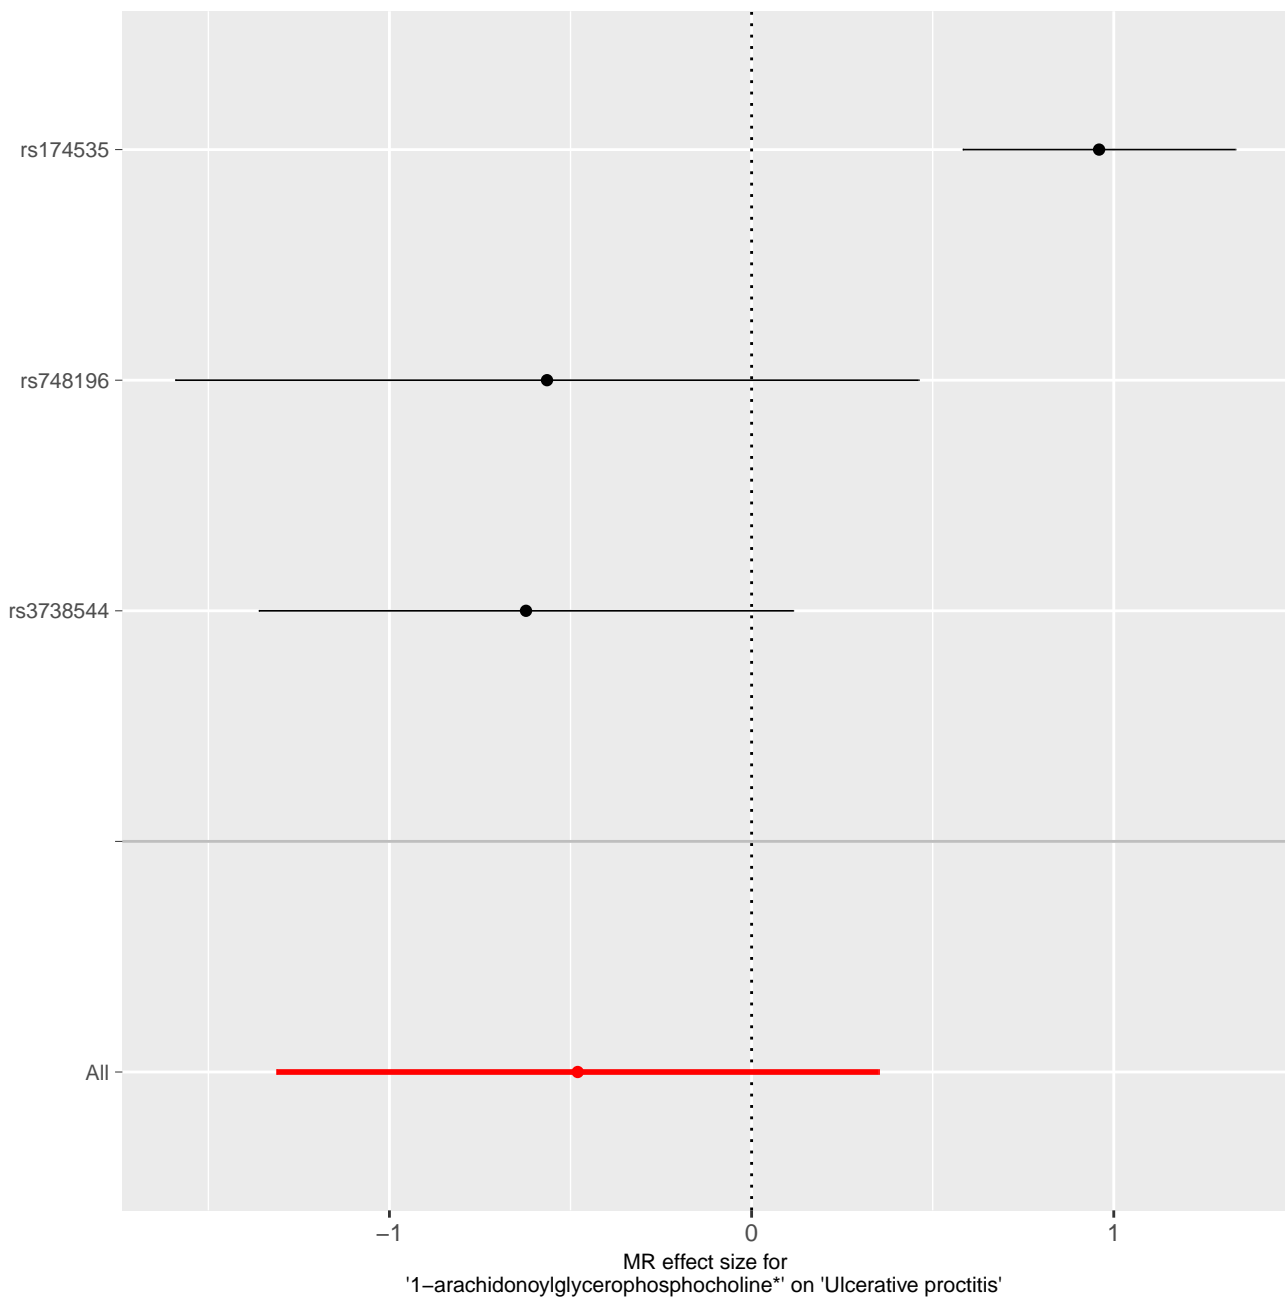

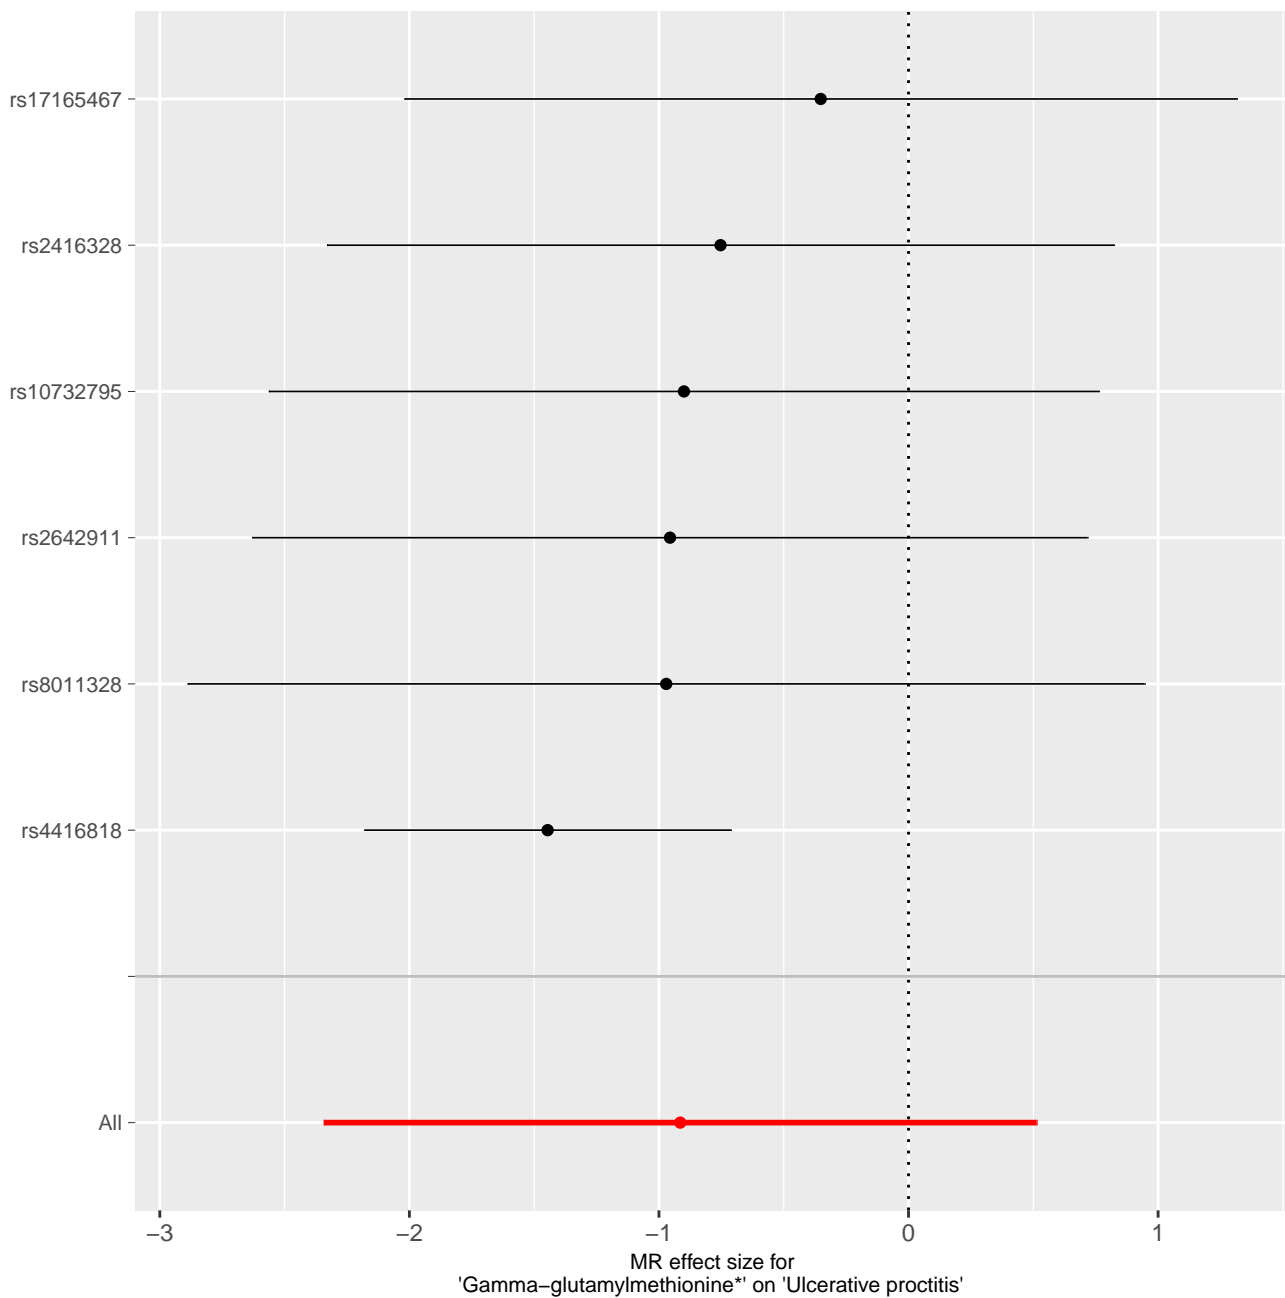

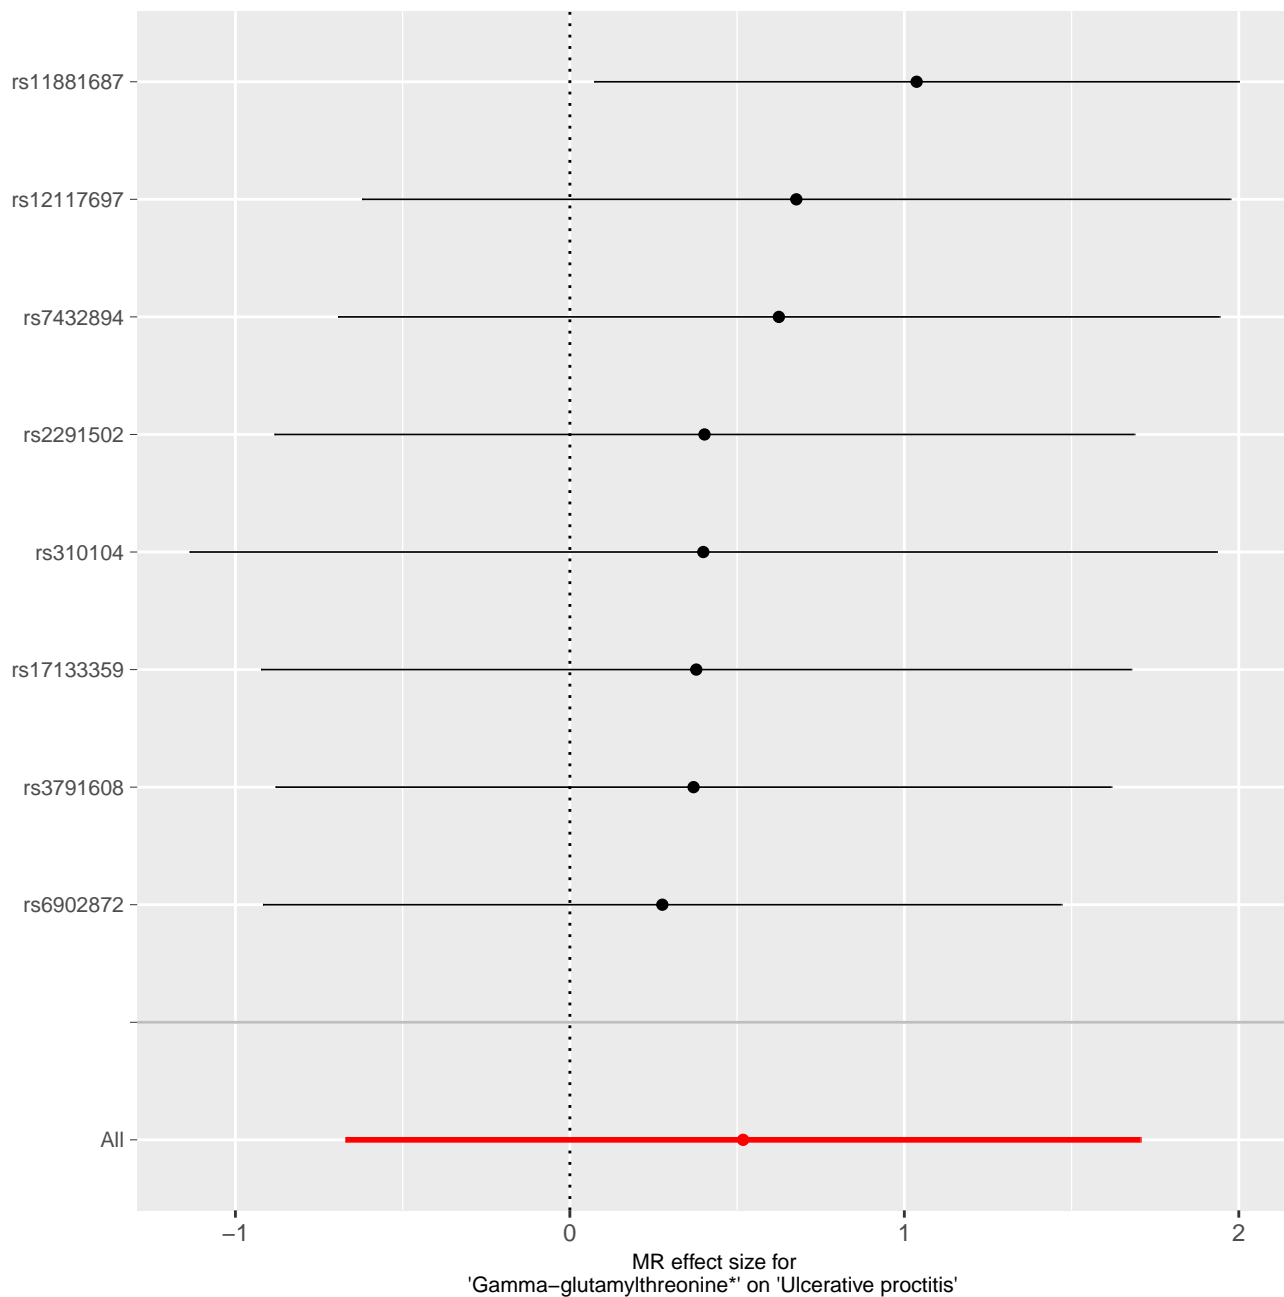



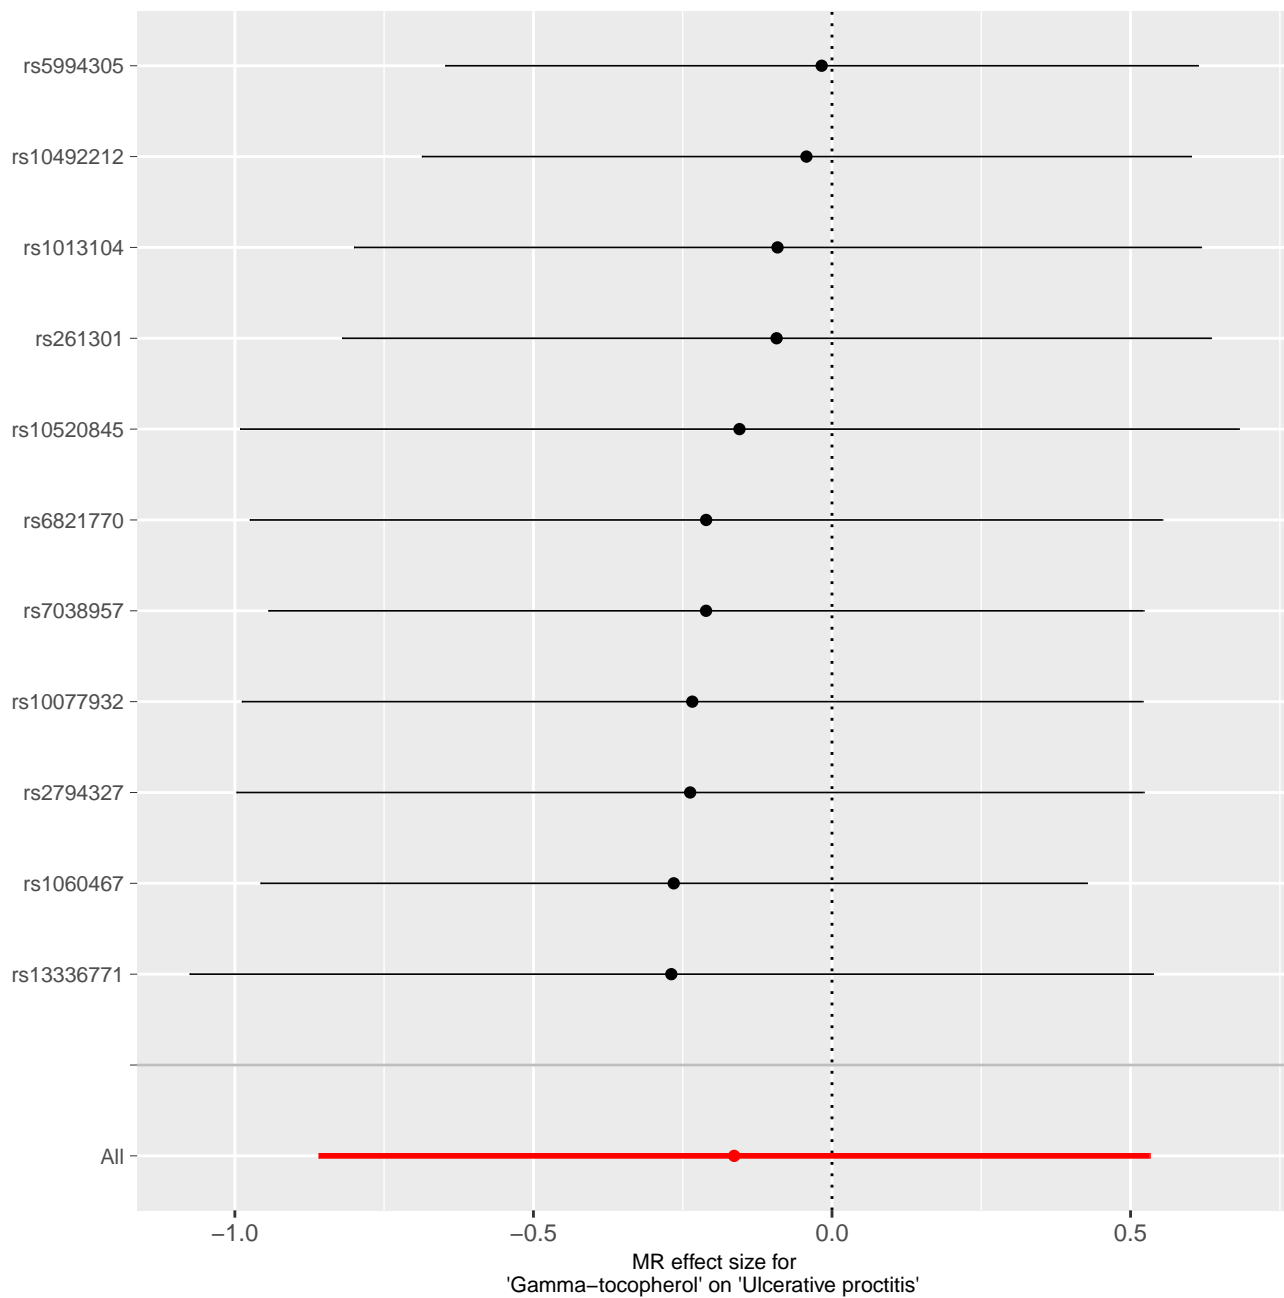

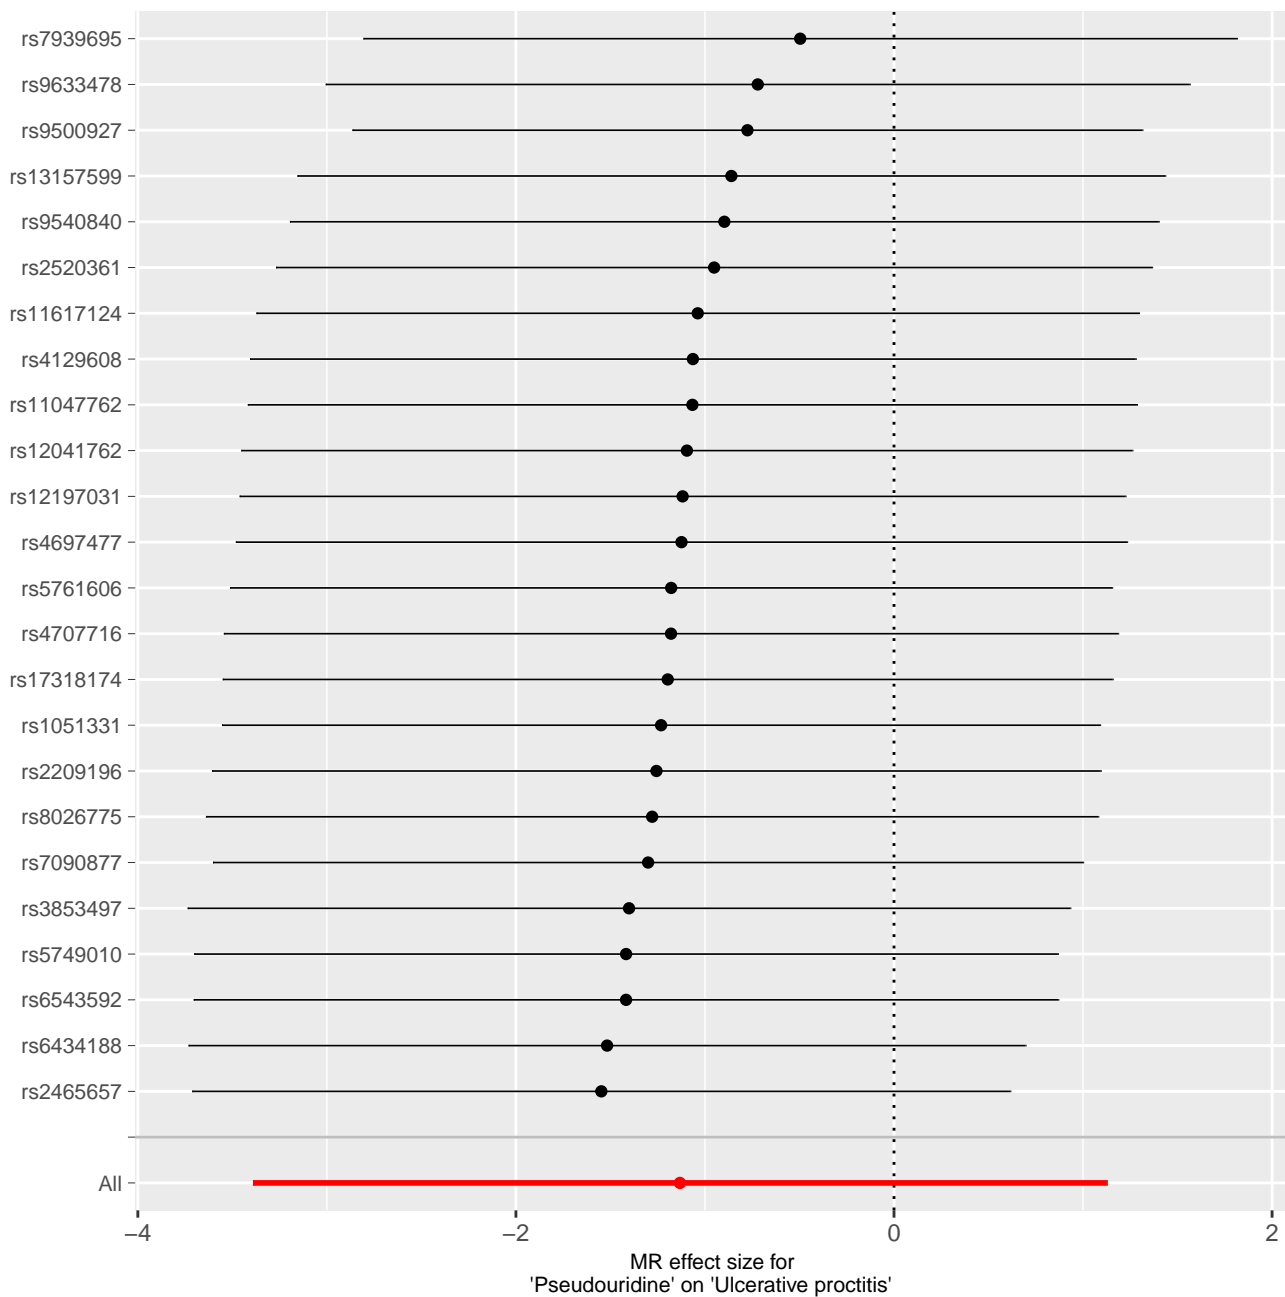

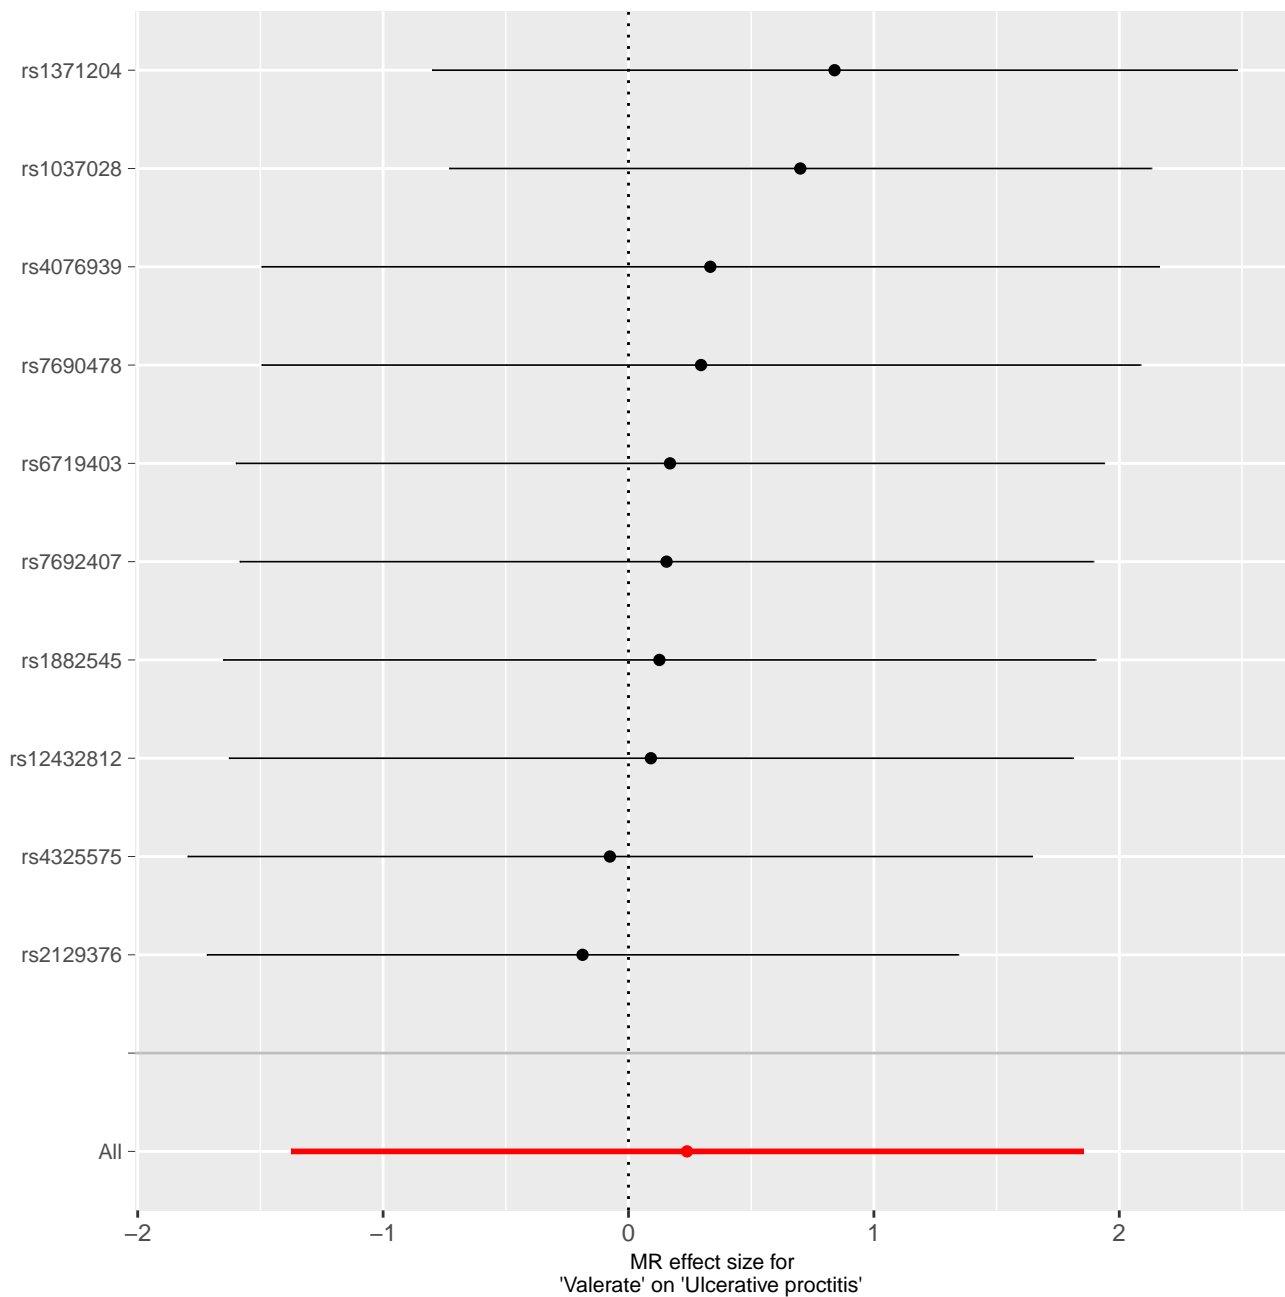

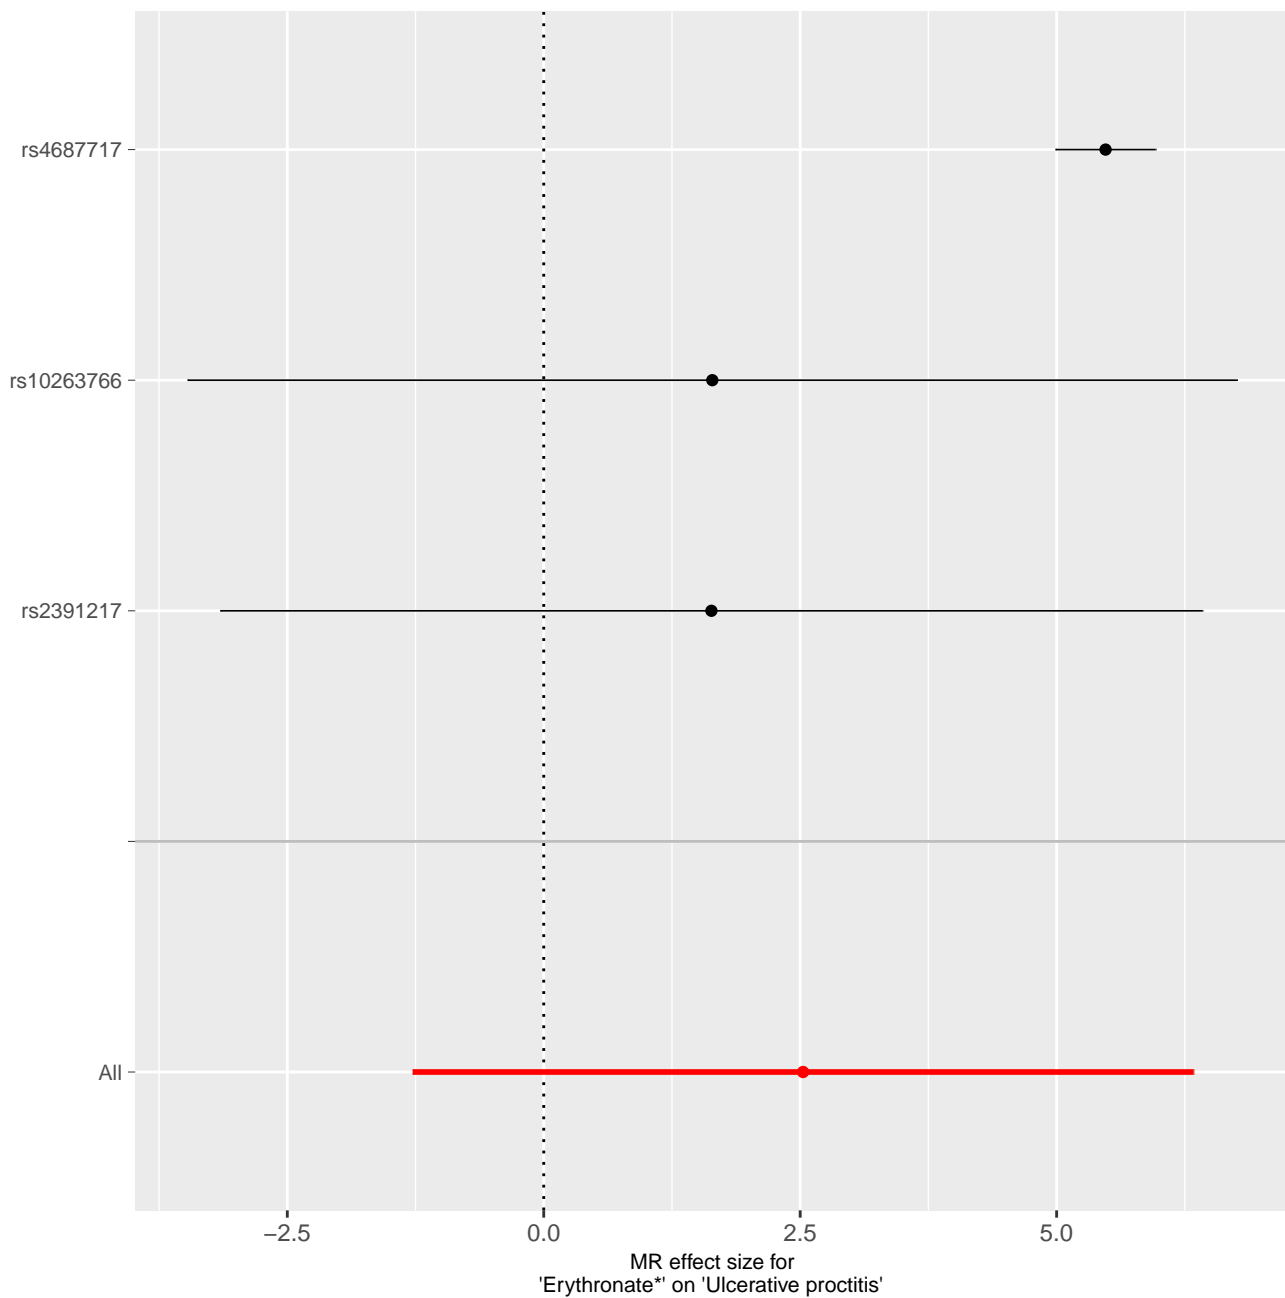

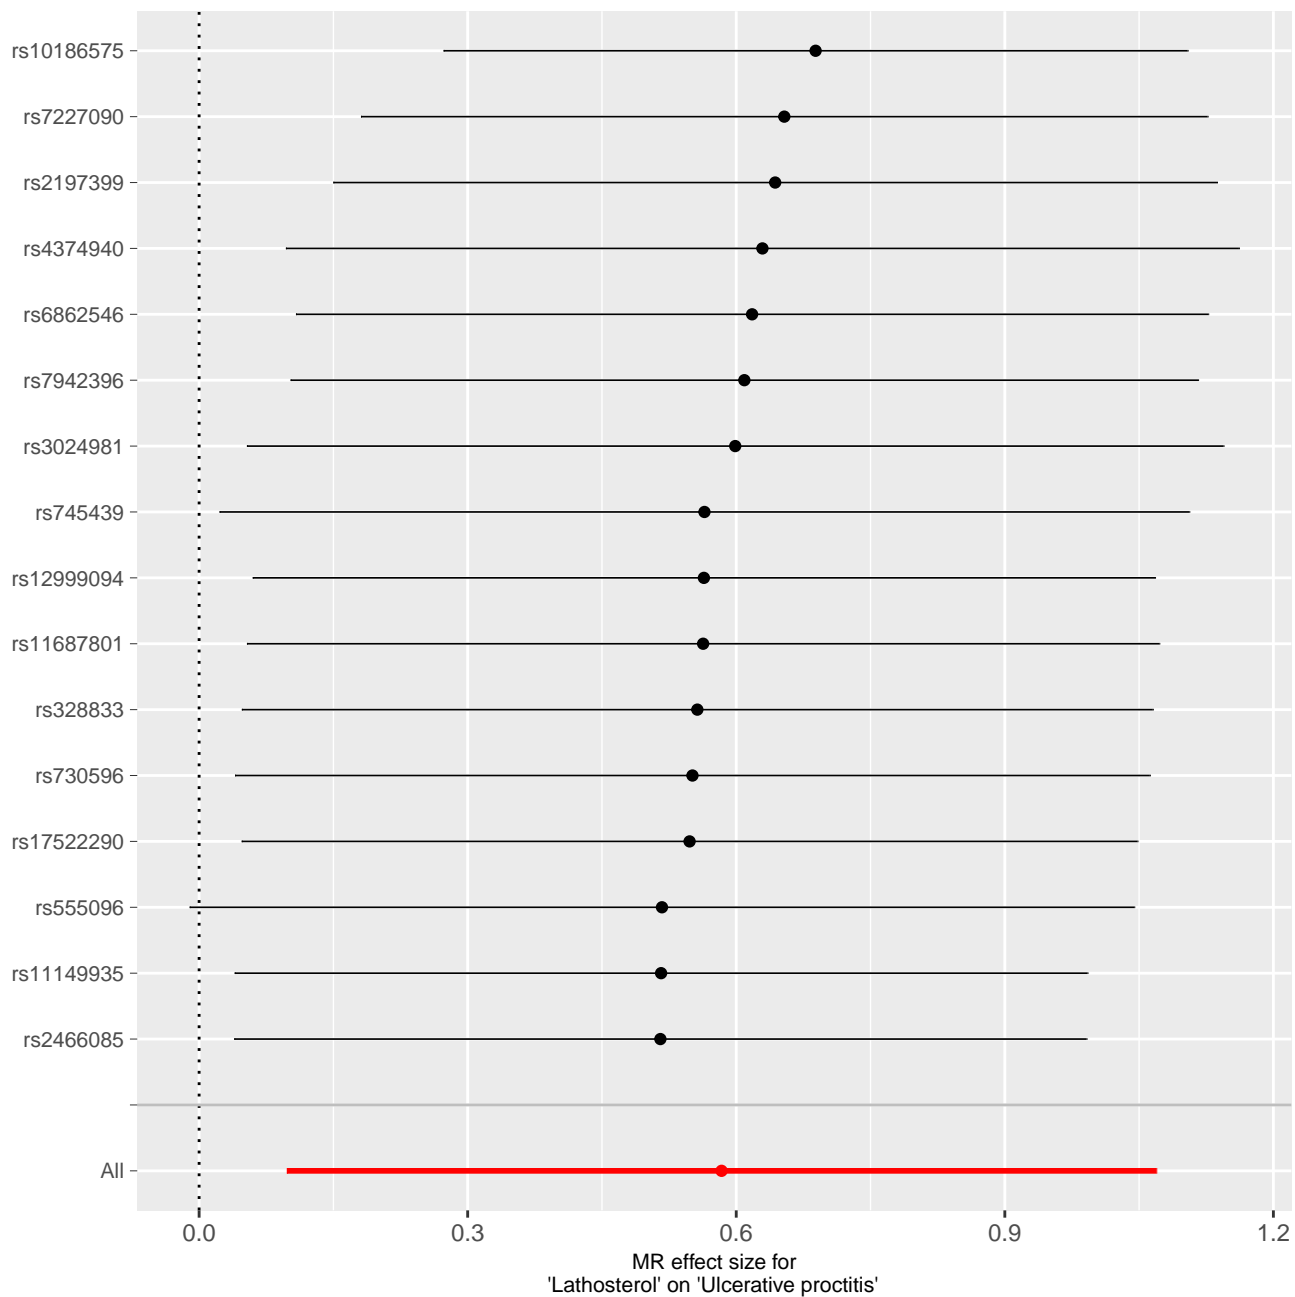

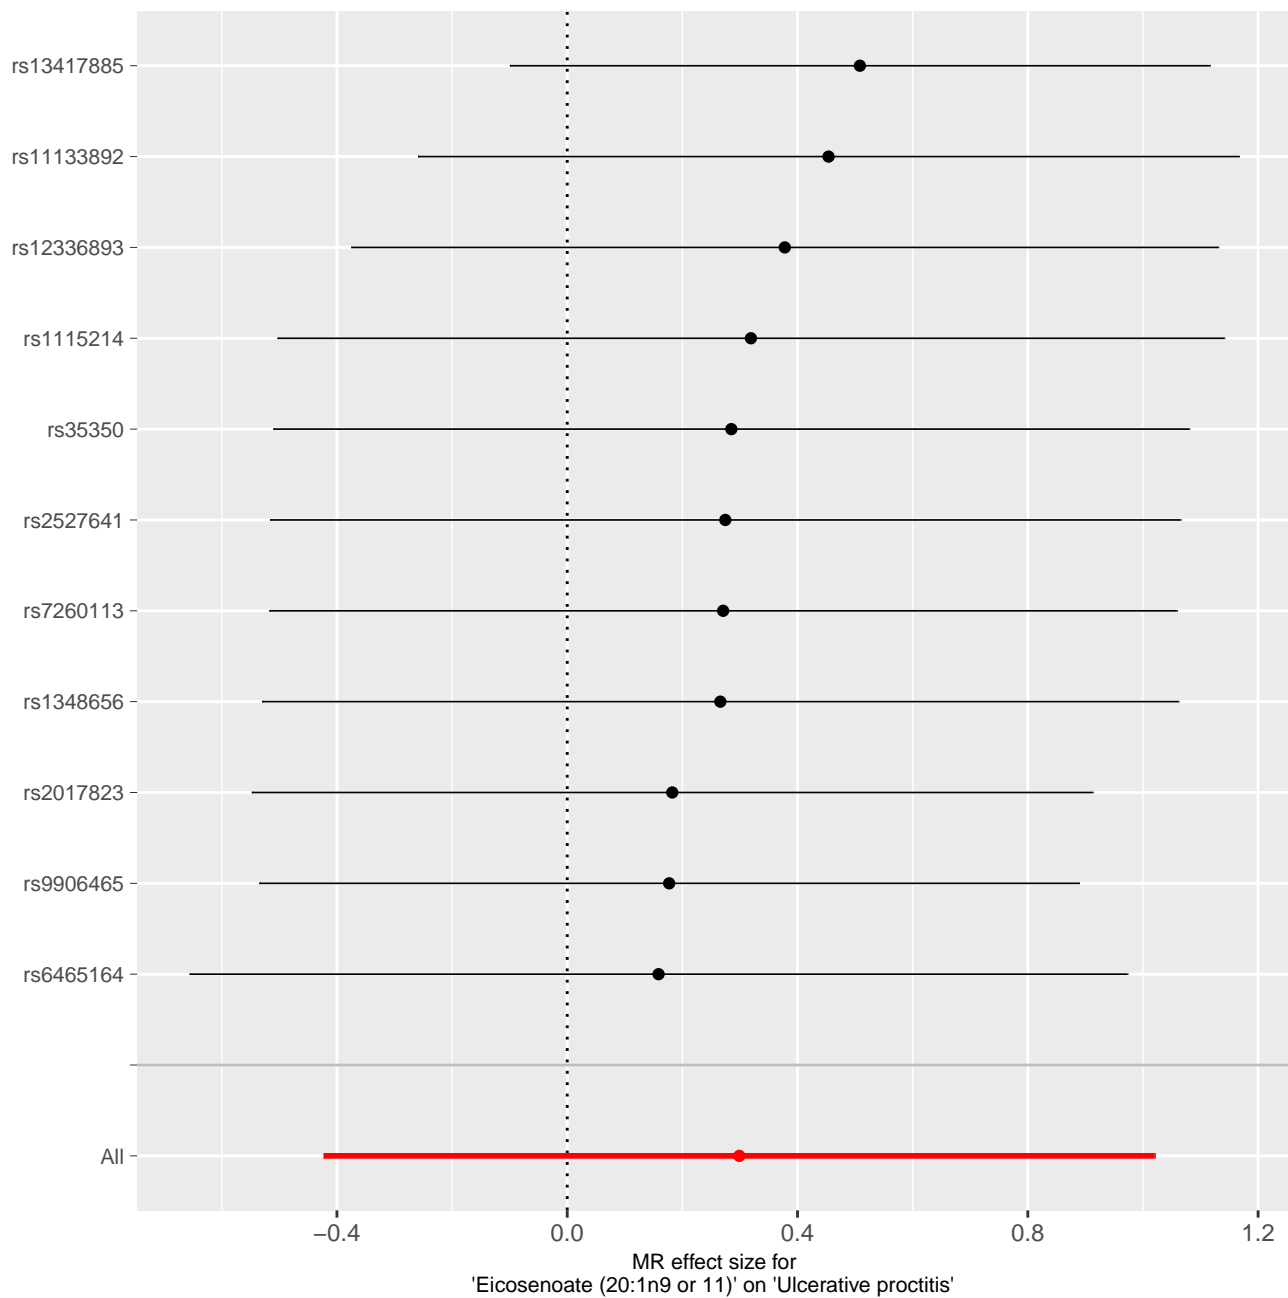

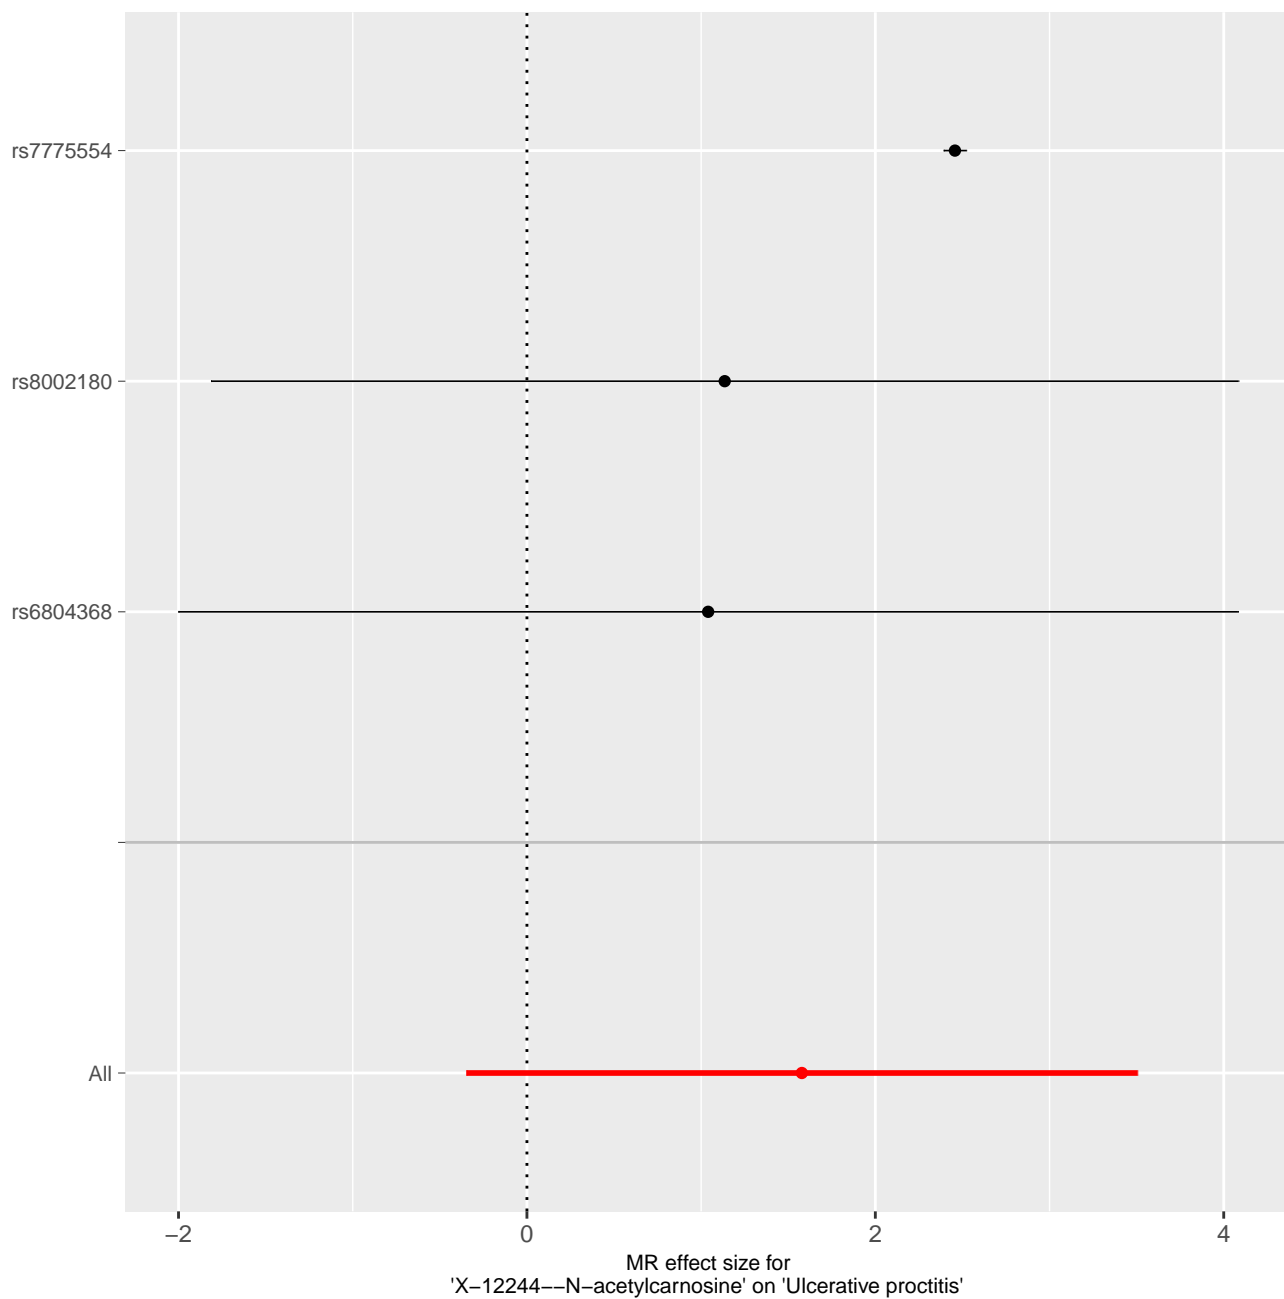

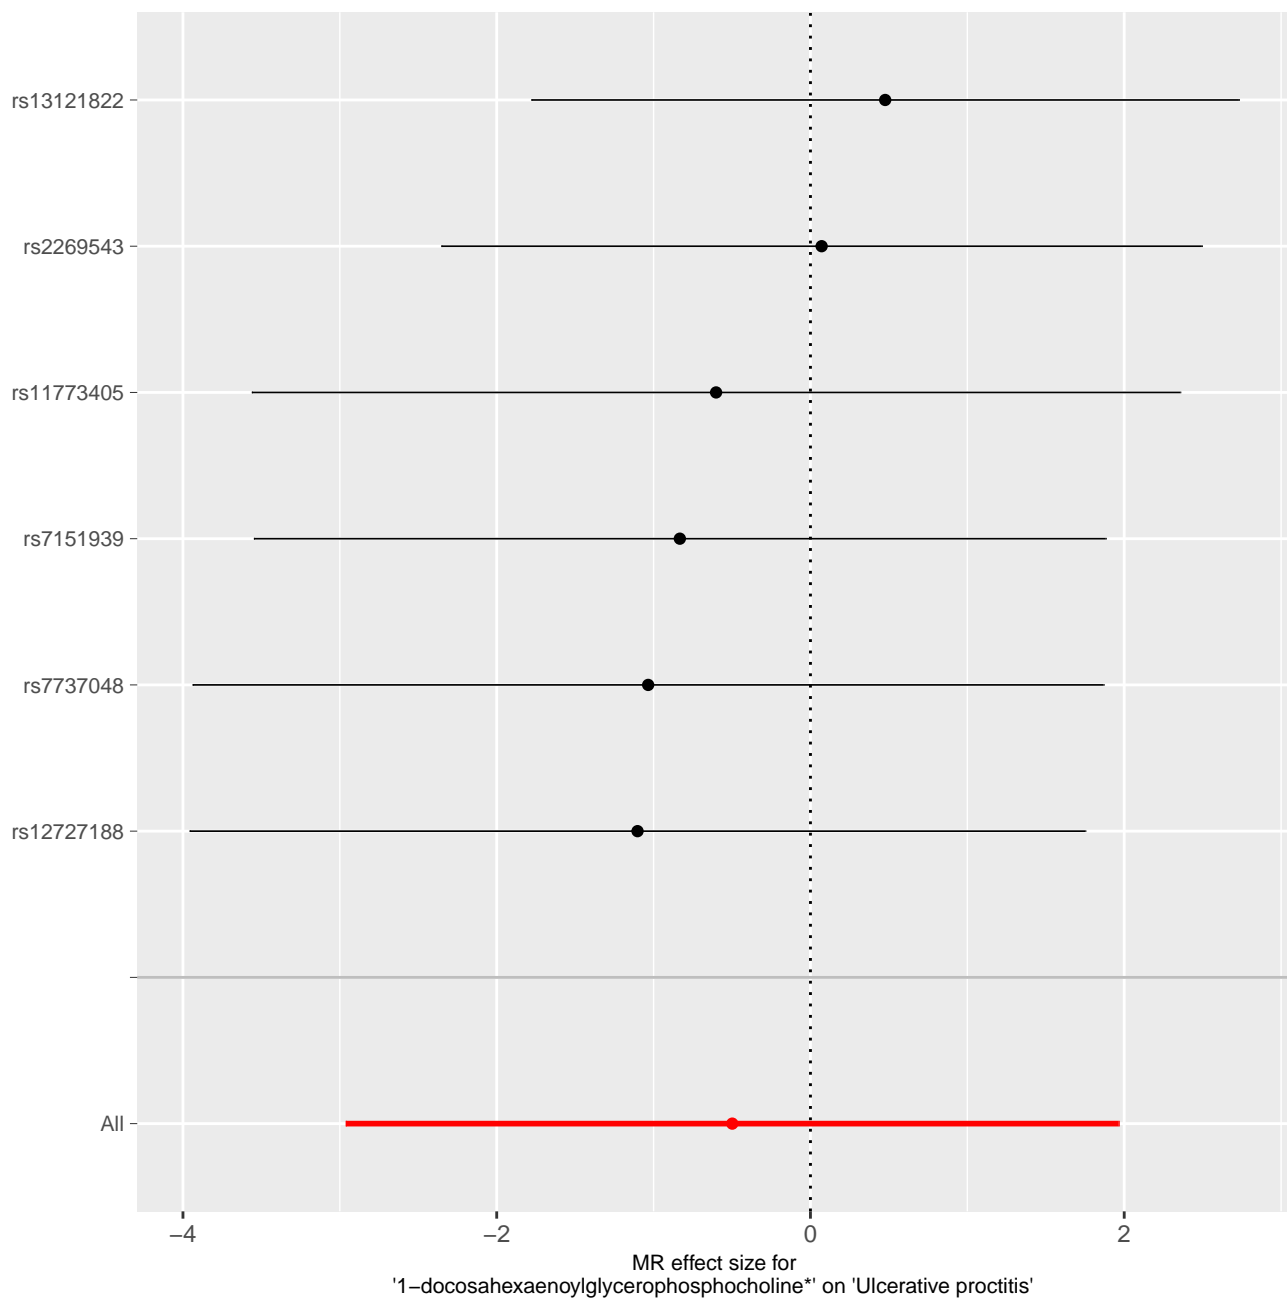



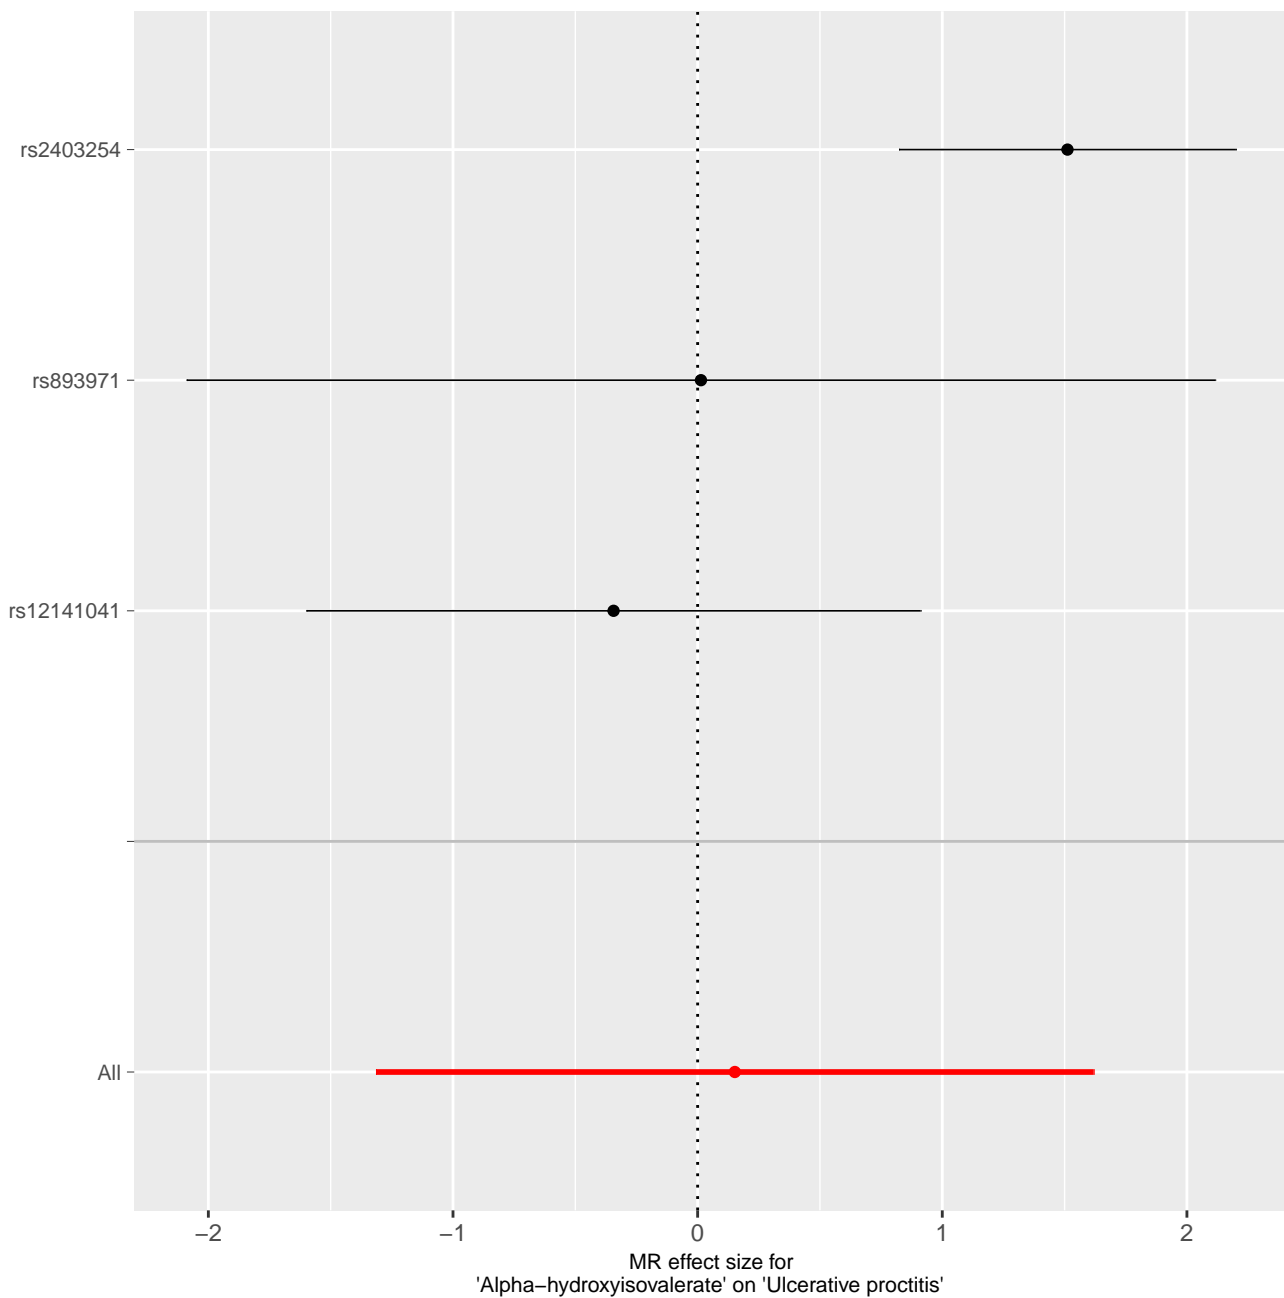

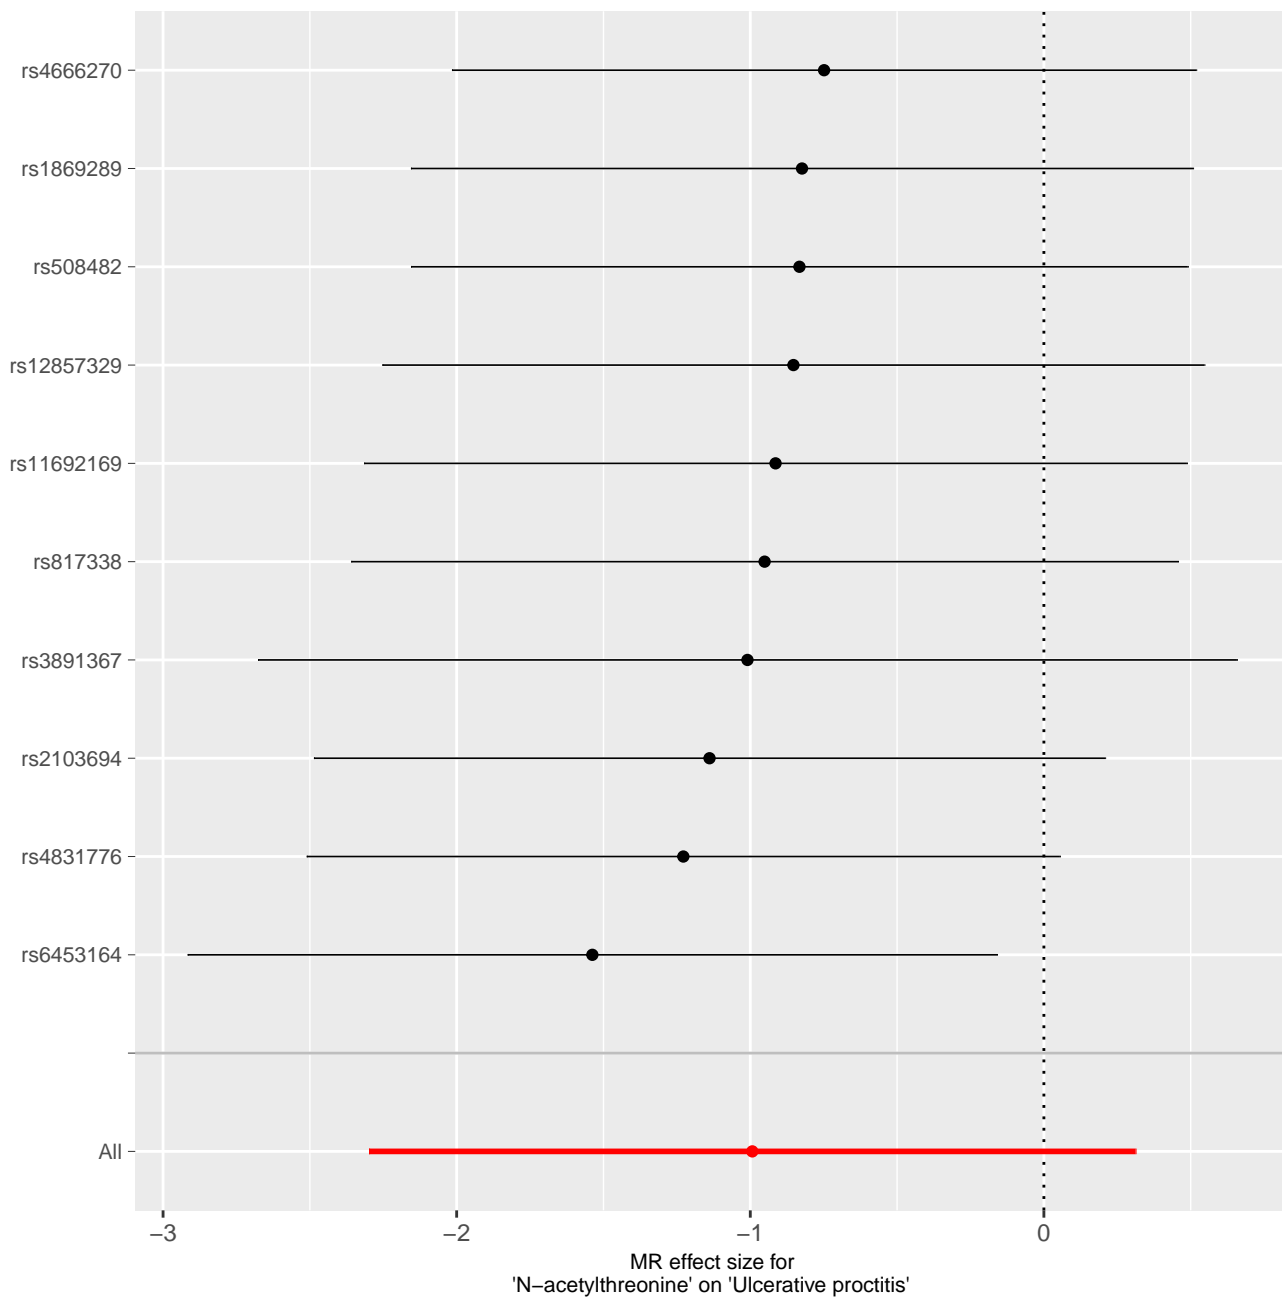

rs7552404

rs2062541

rs8396

All

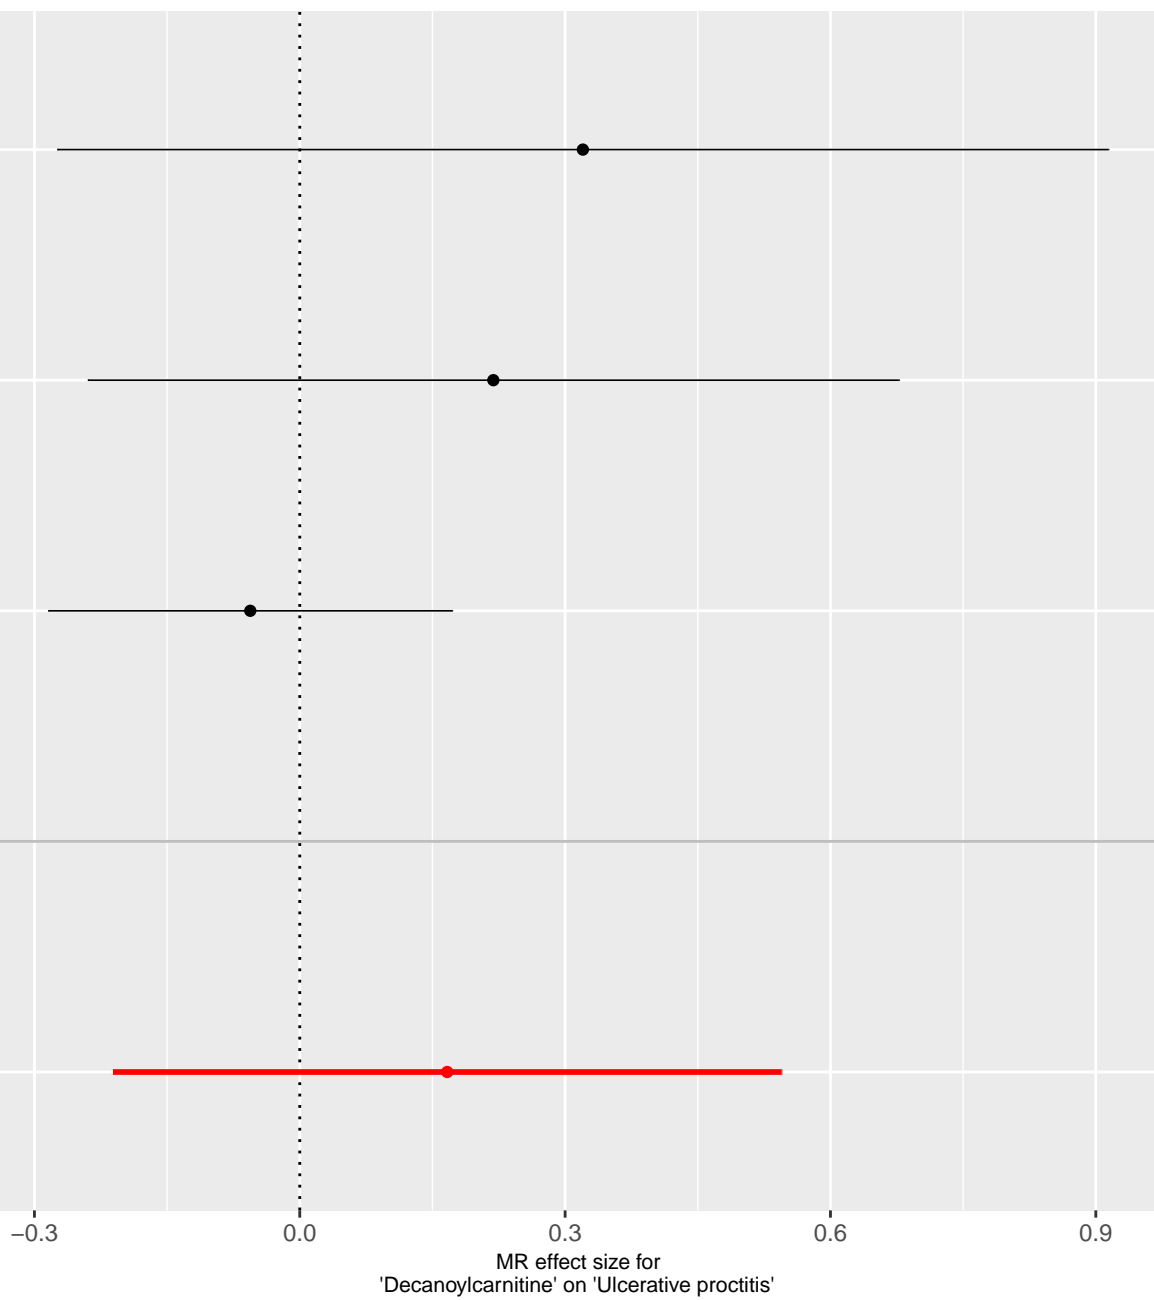

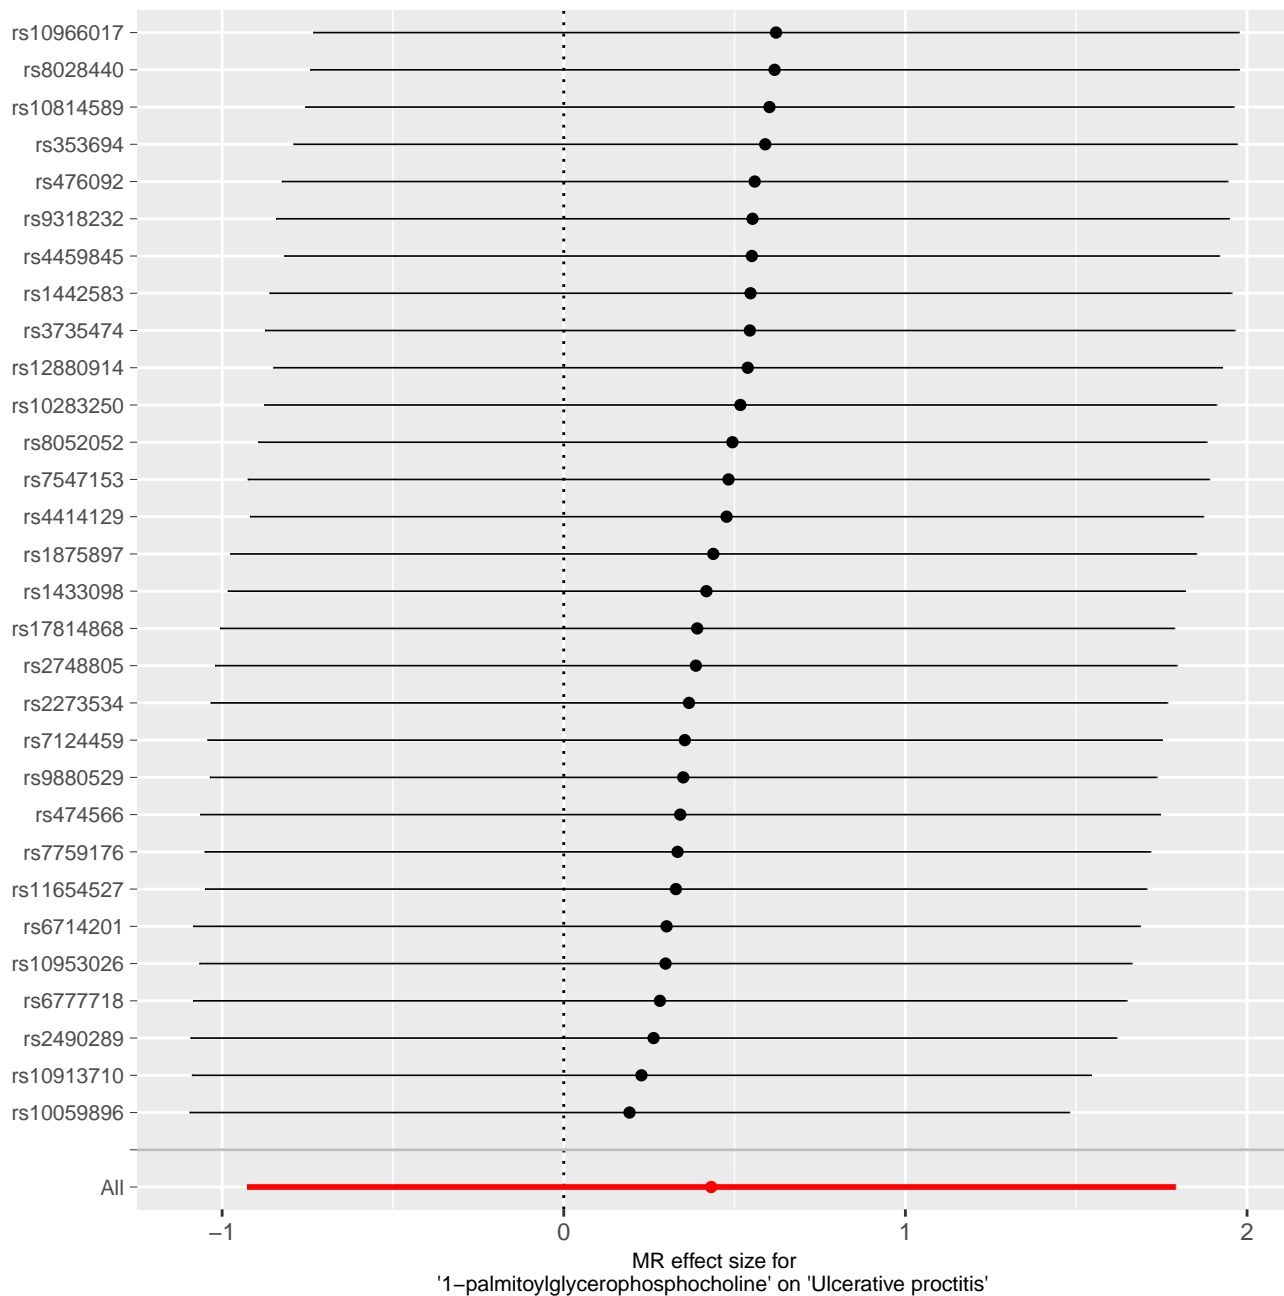

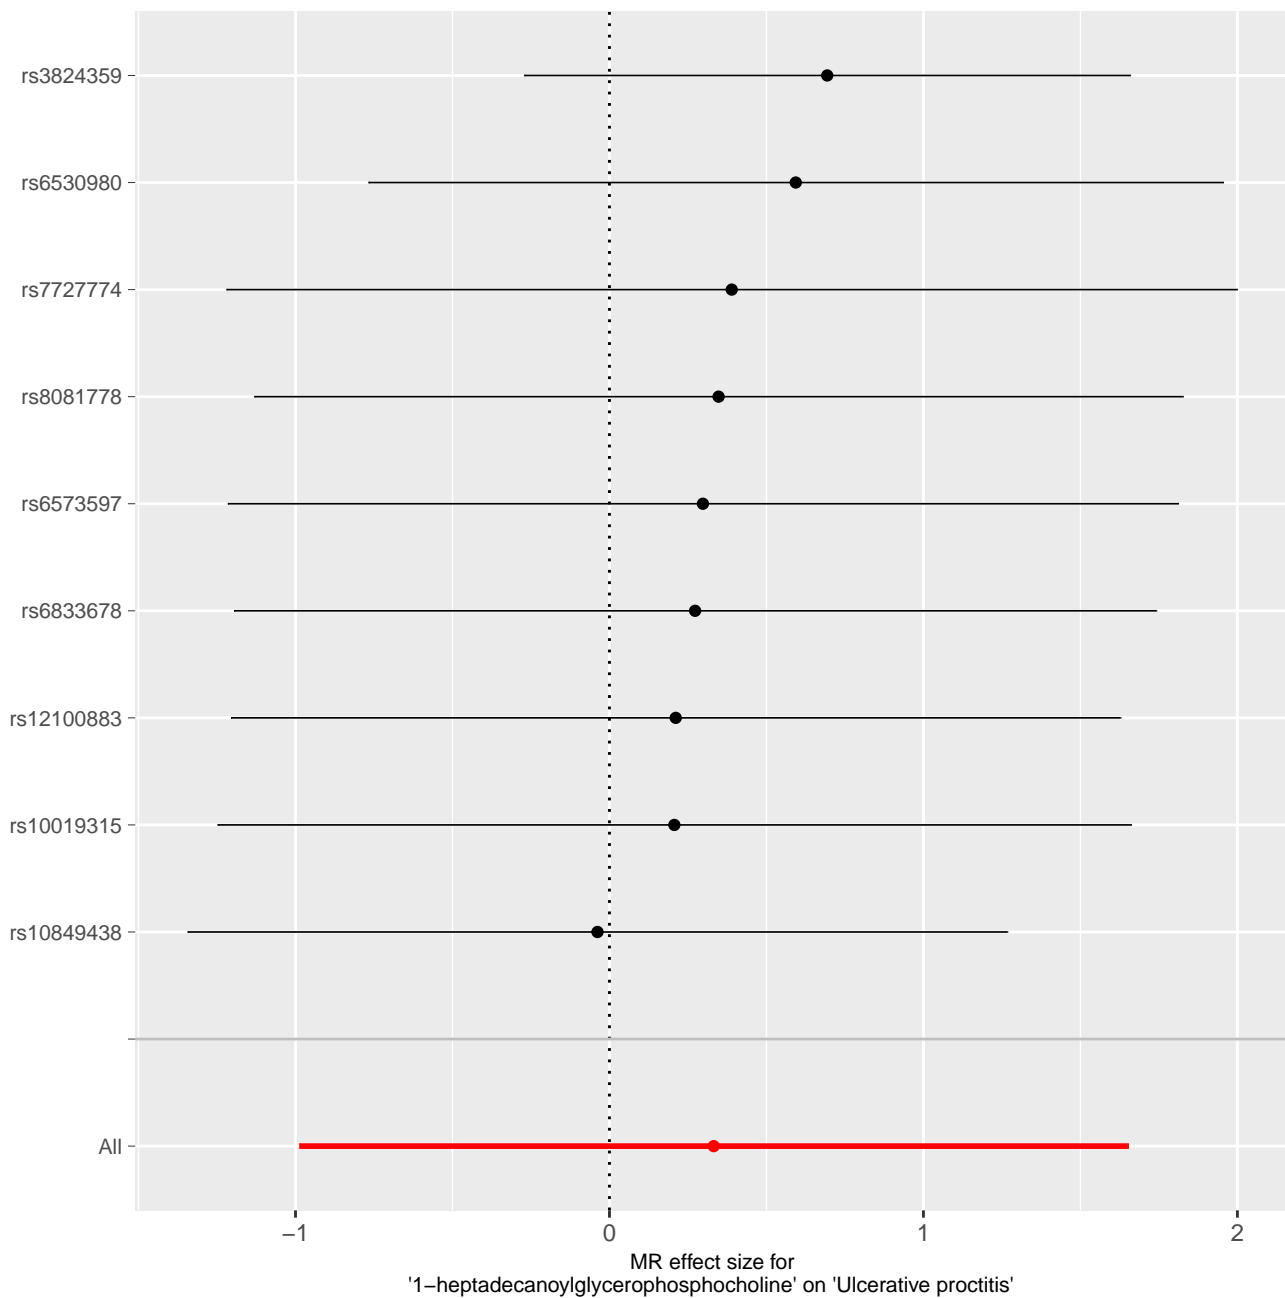

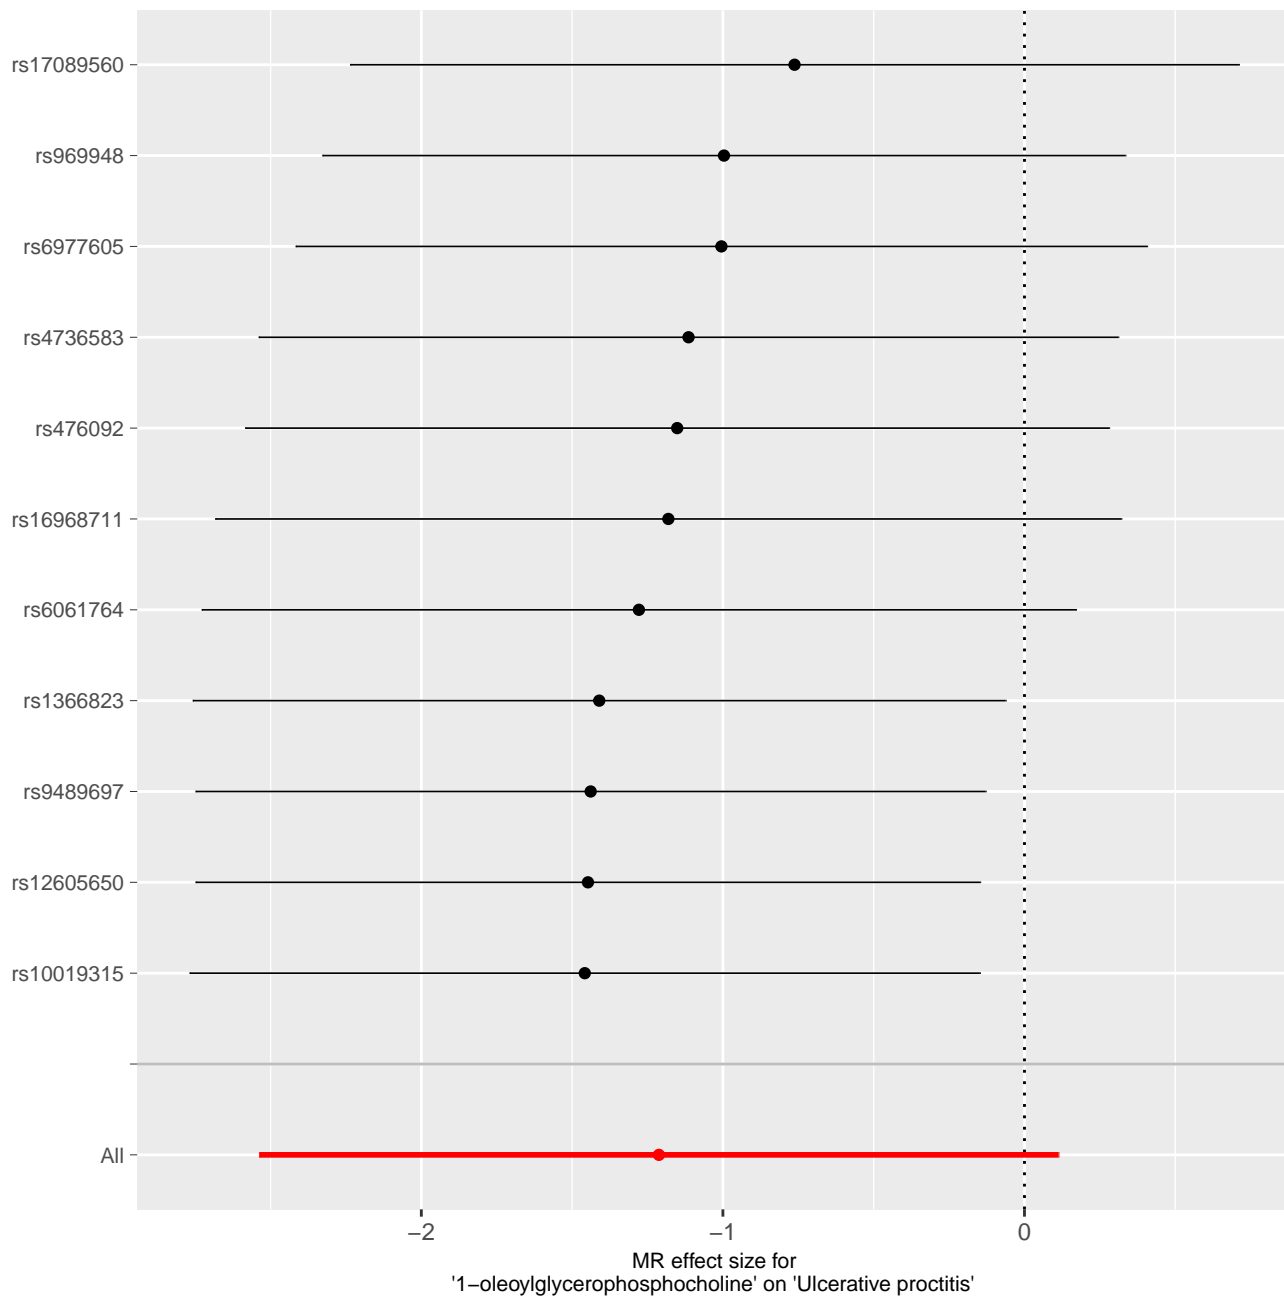

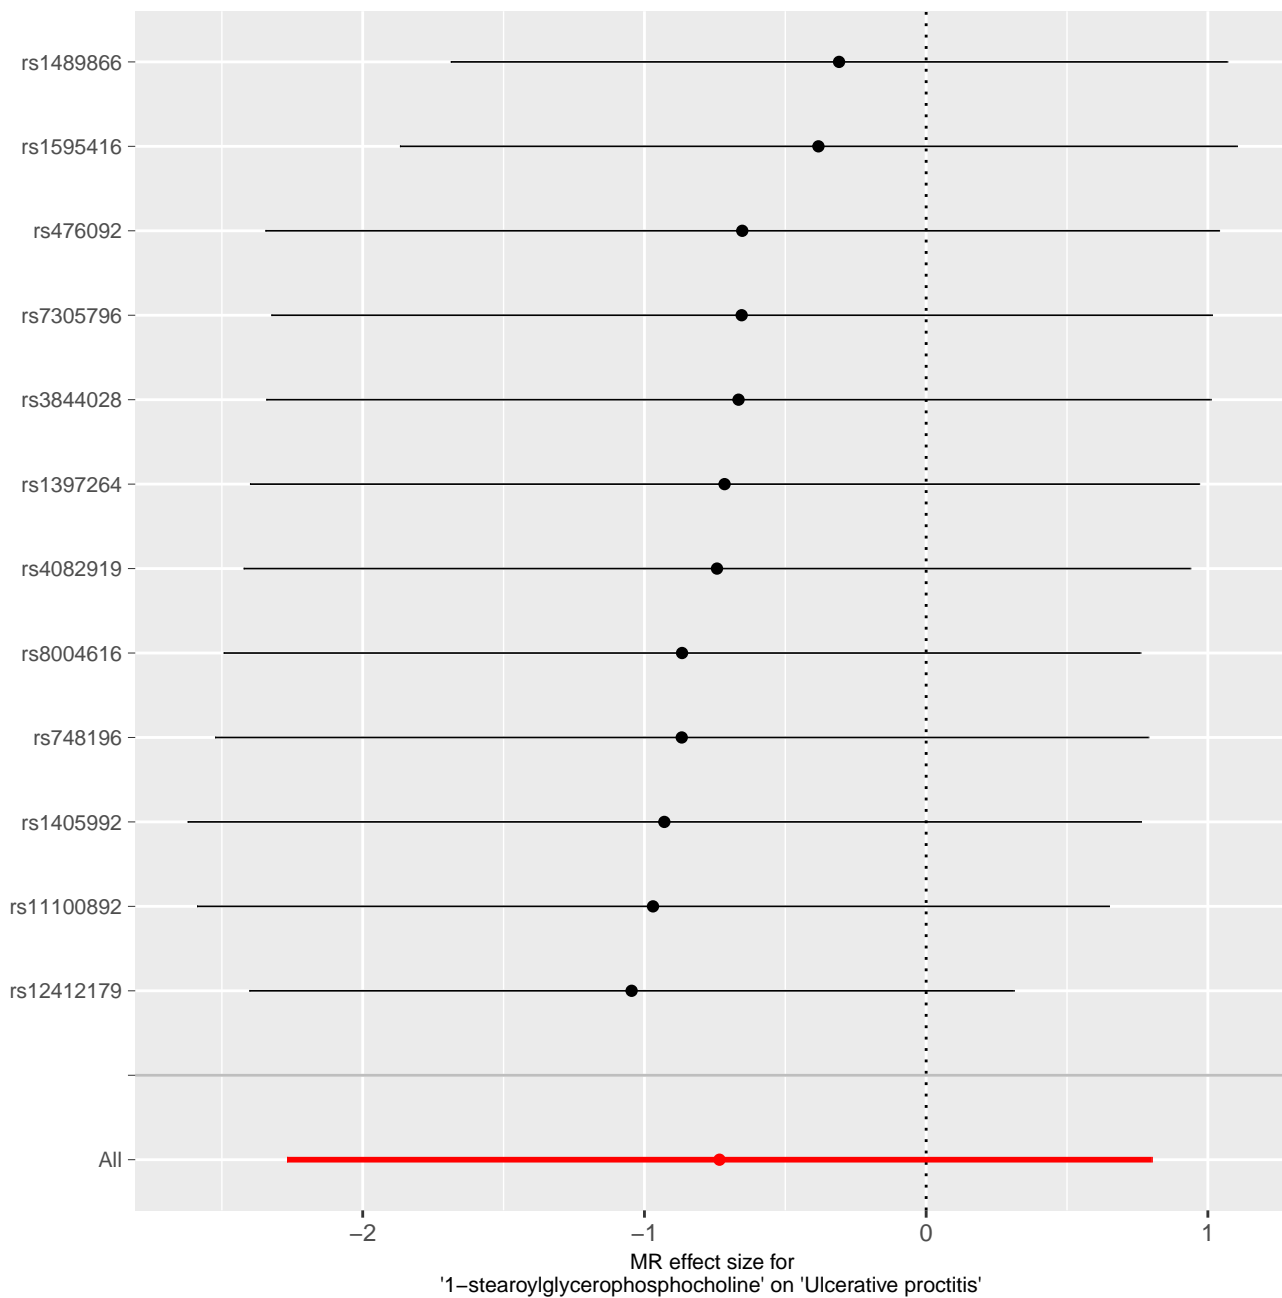

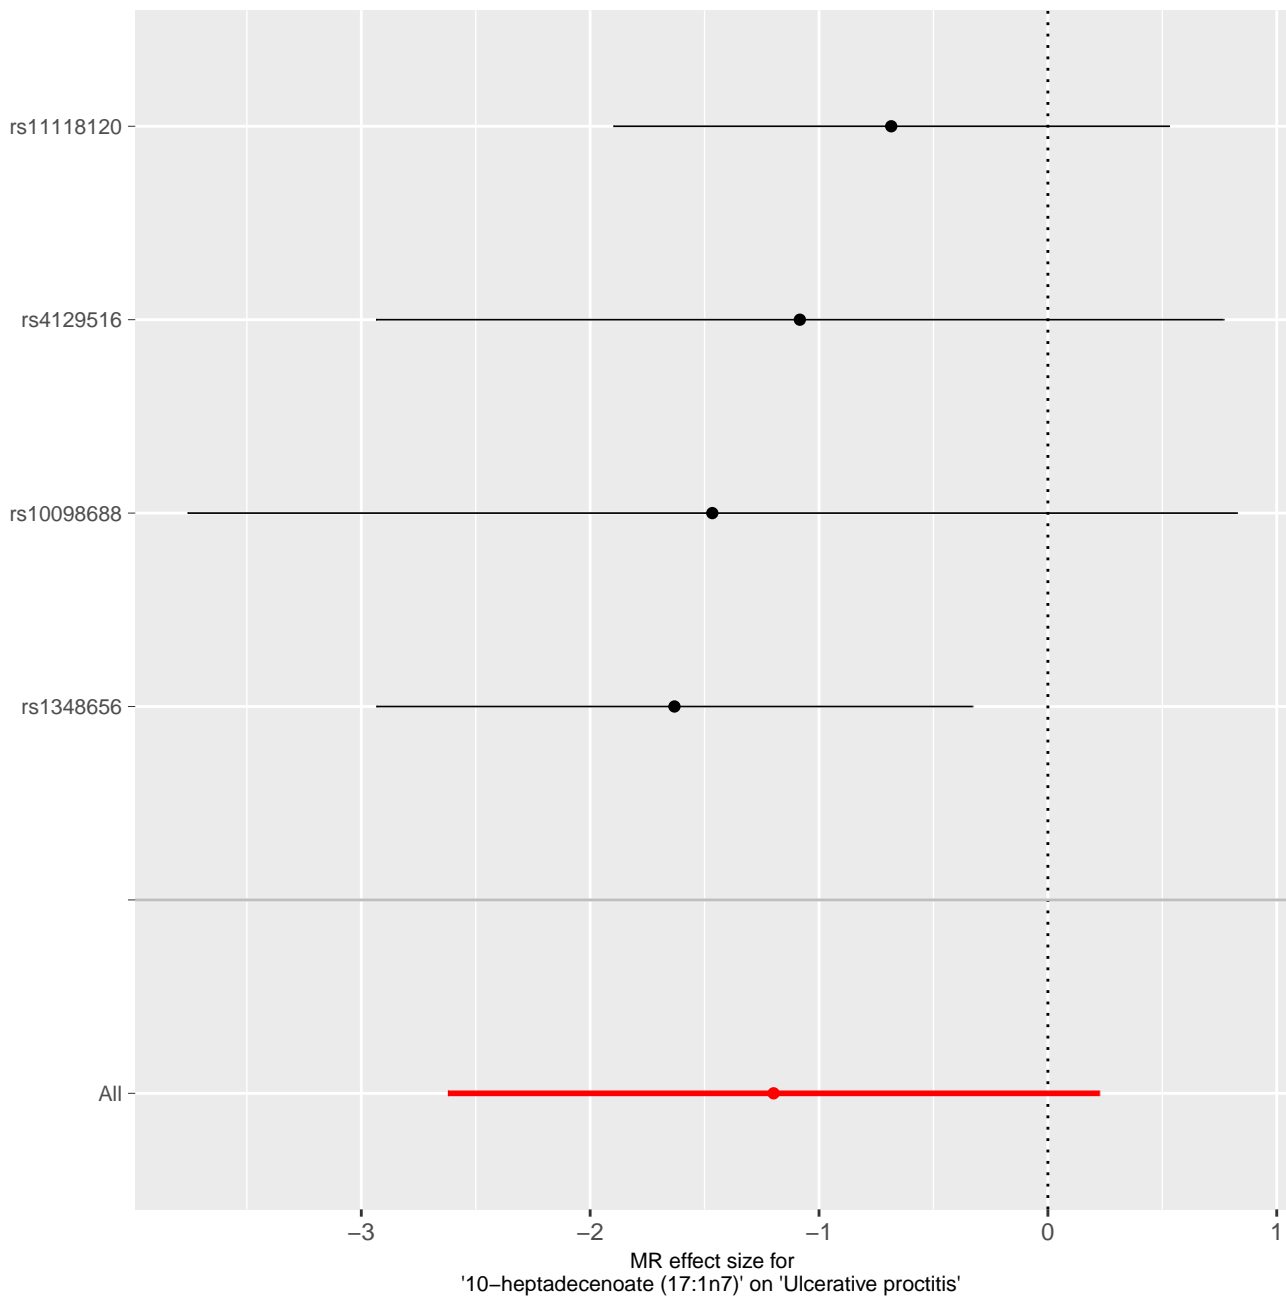



rs1034879

rs1348656

rs2242415

All

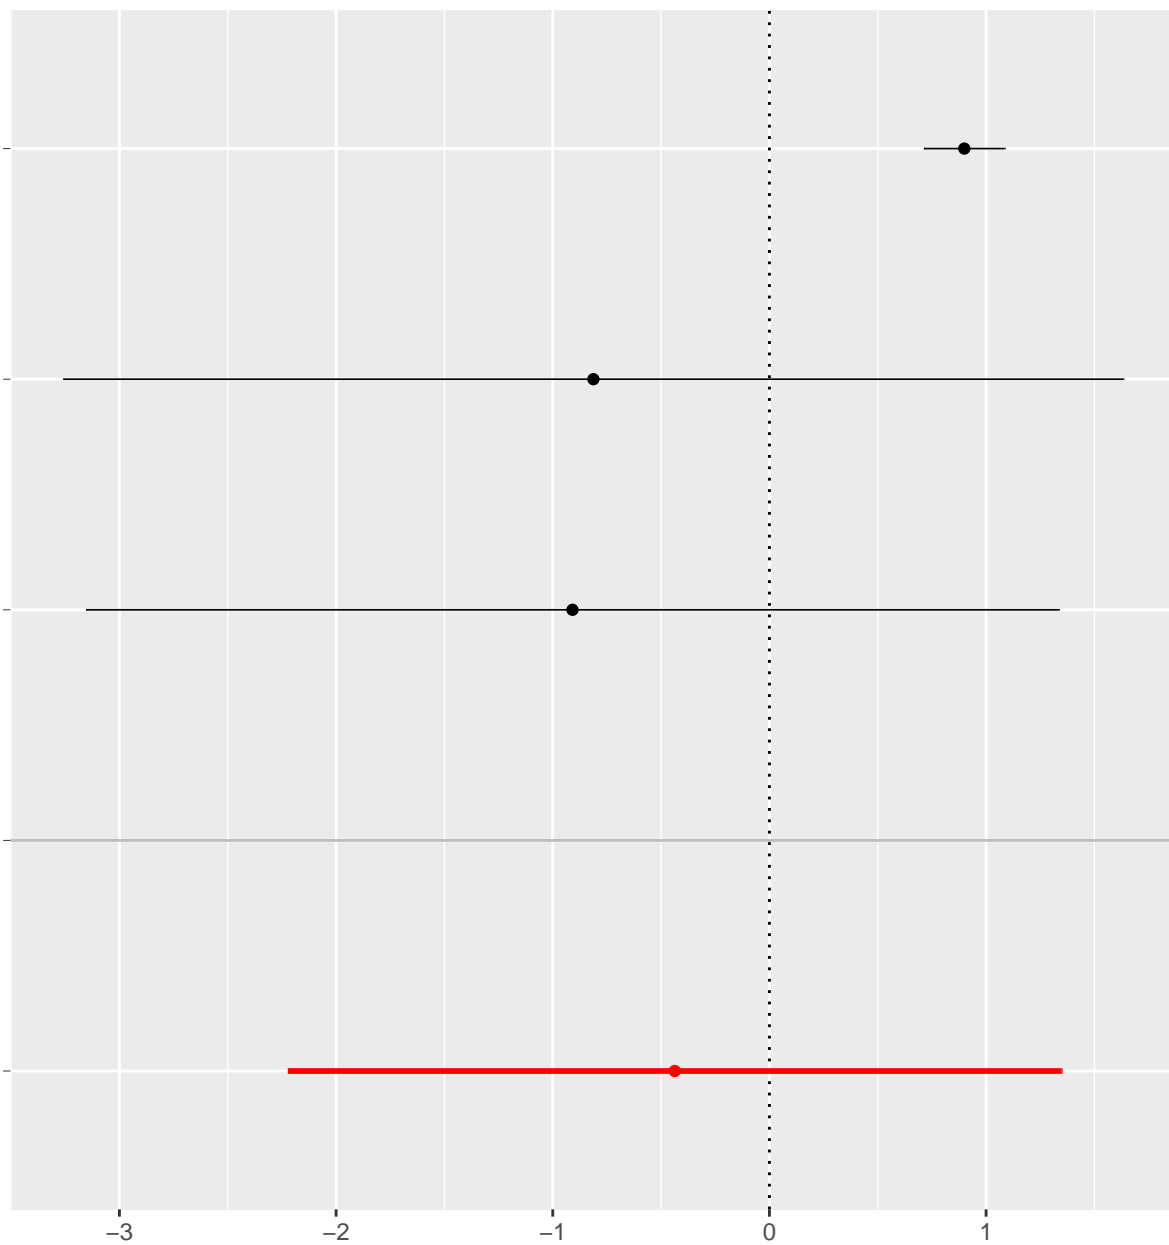

MR effect size for  
'Linolenate [alpha or gamma; (18:3n3 or 6)]' on 'Ulcerative proctitis'

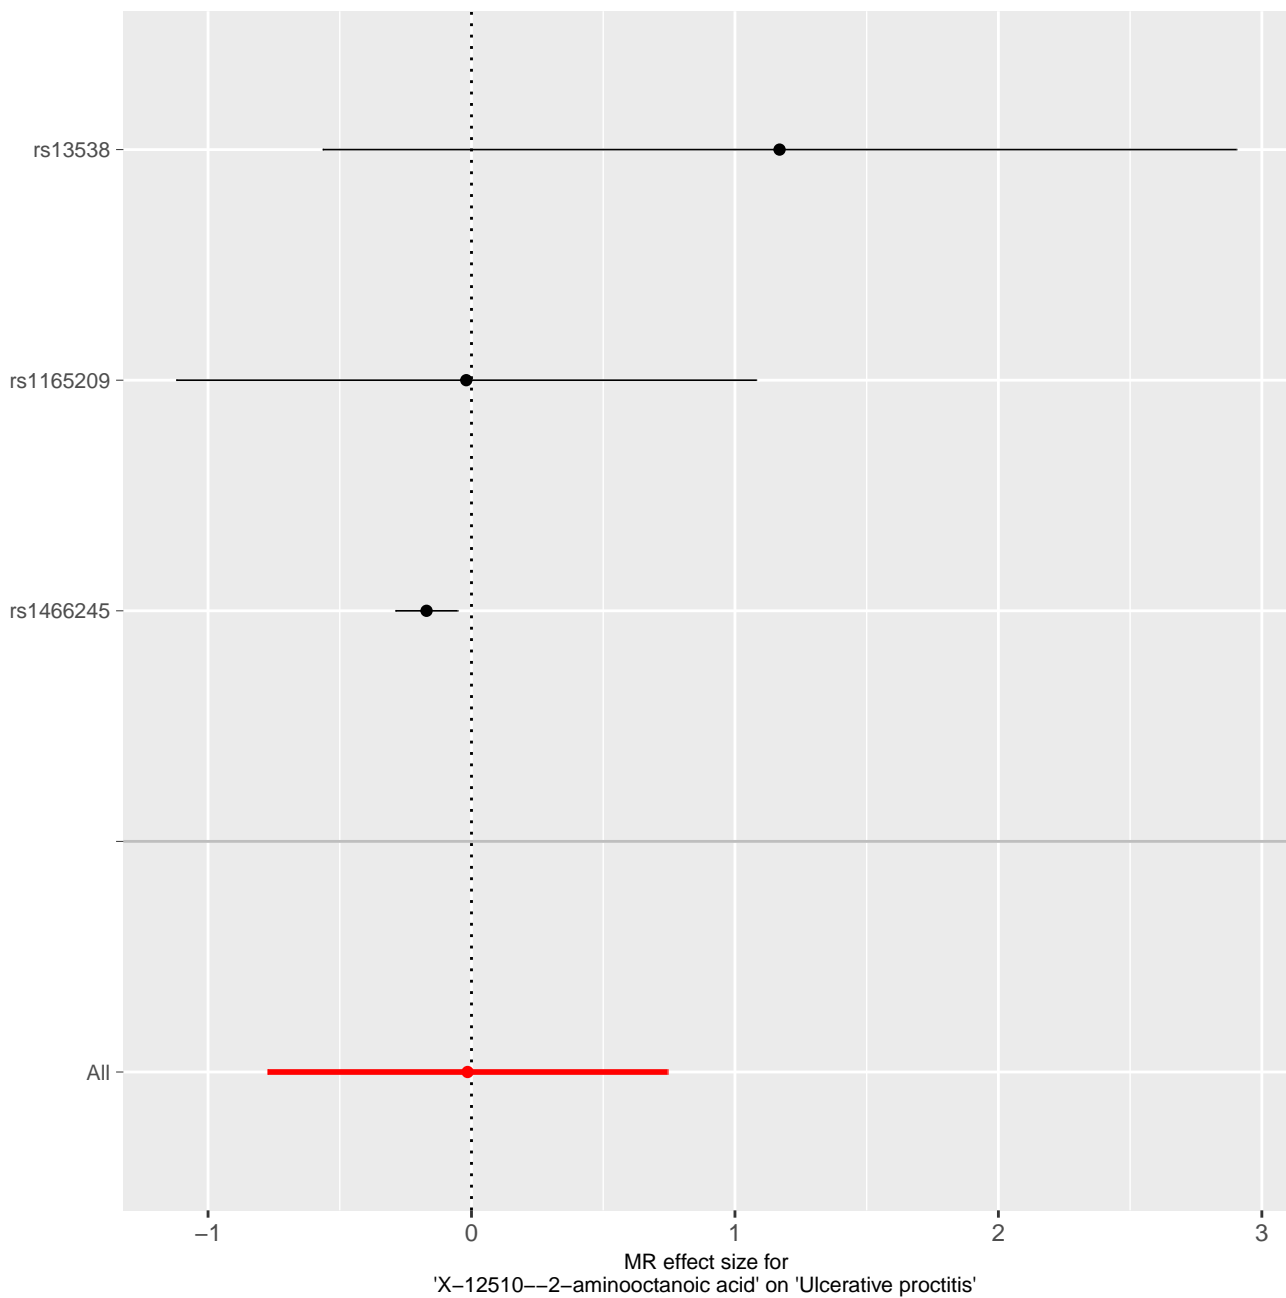

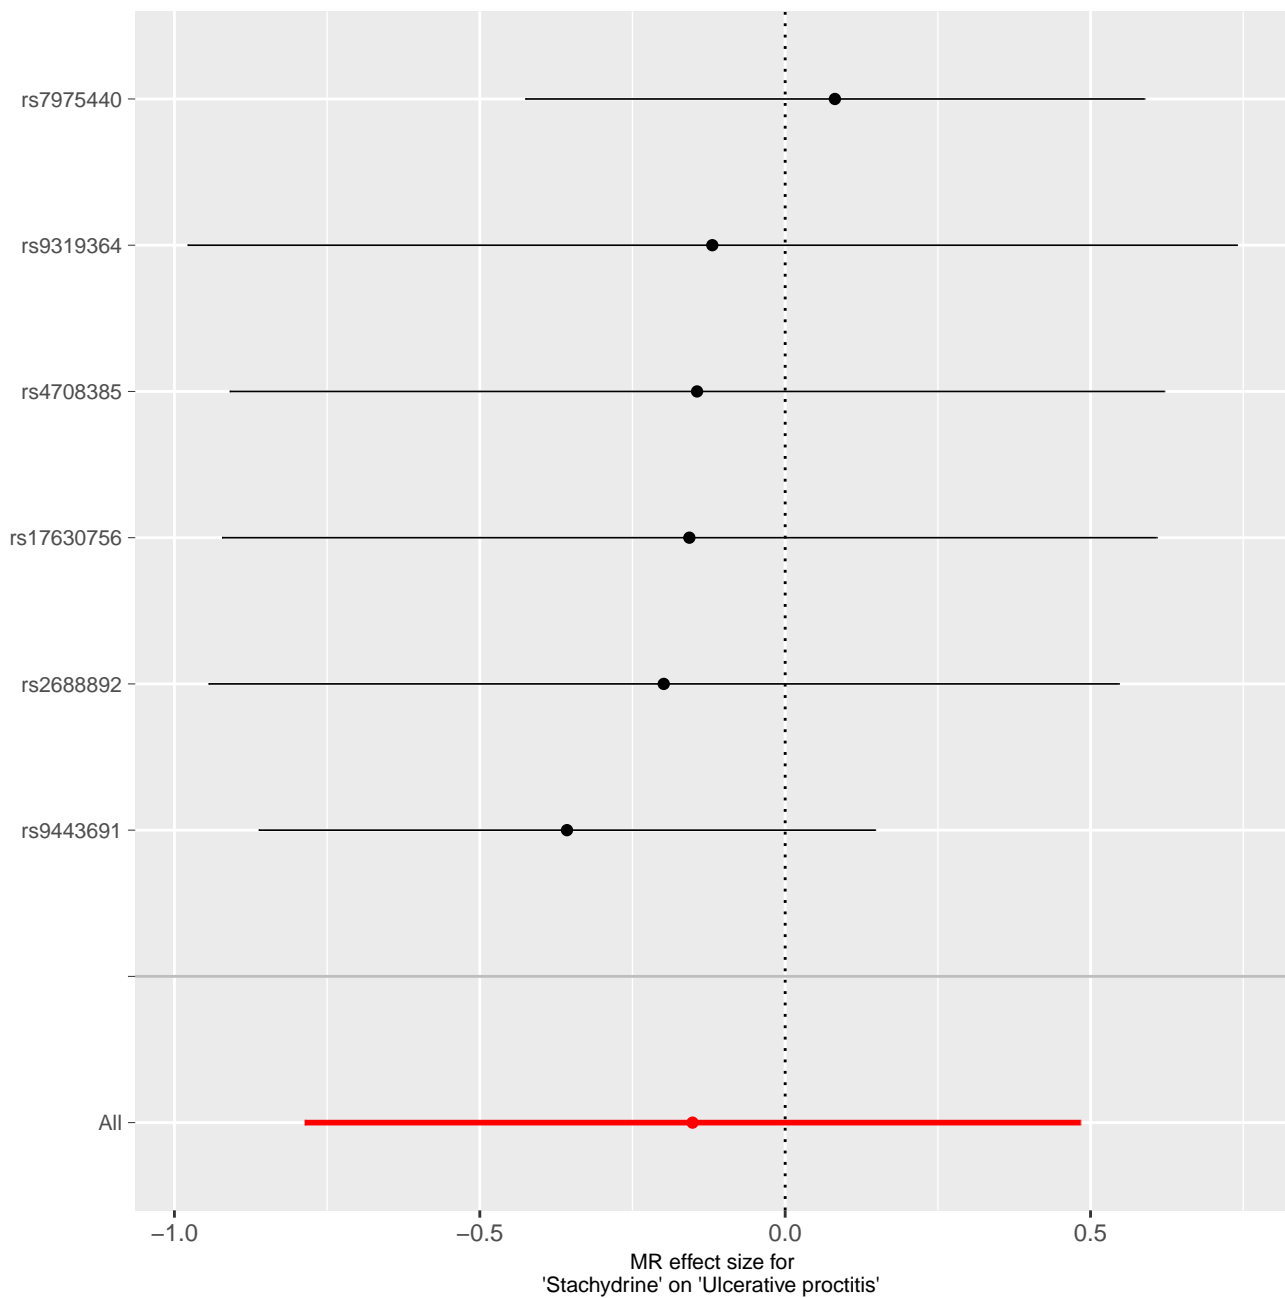

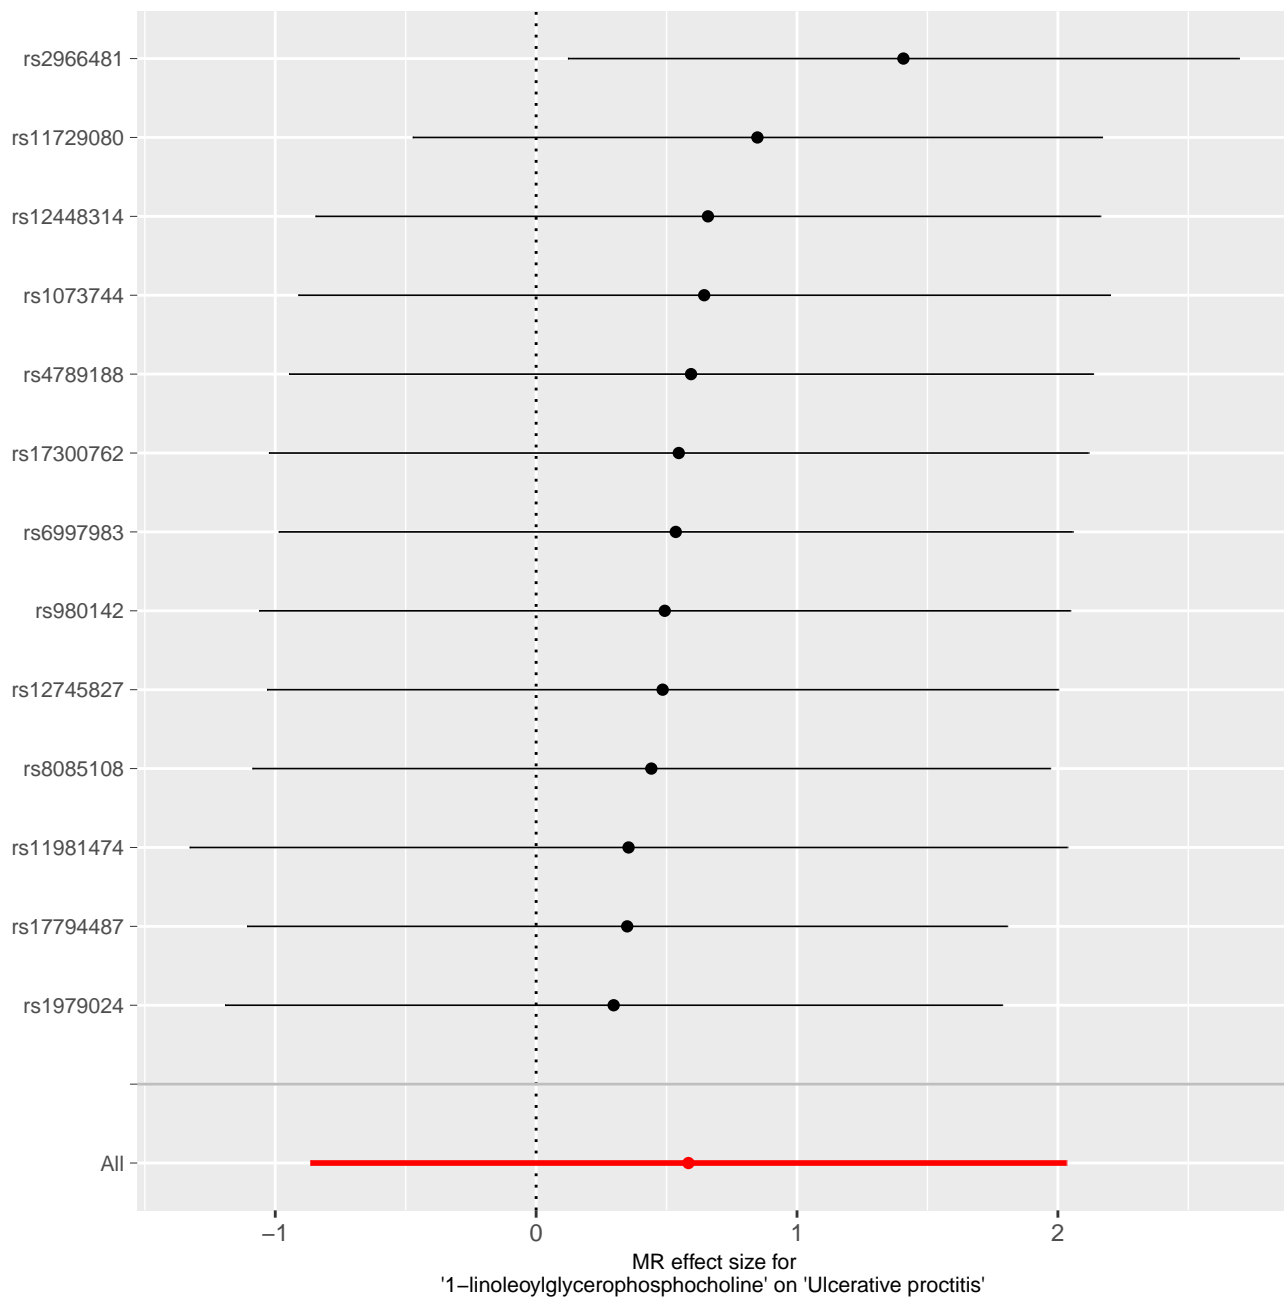

rs2731672

rs5030062

rs4253311

All

-0.25

0.00

0.25

MR effect size for  
'Bradykinin, des-arg(9)' on 'Ulcerative proctitis'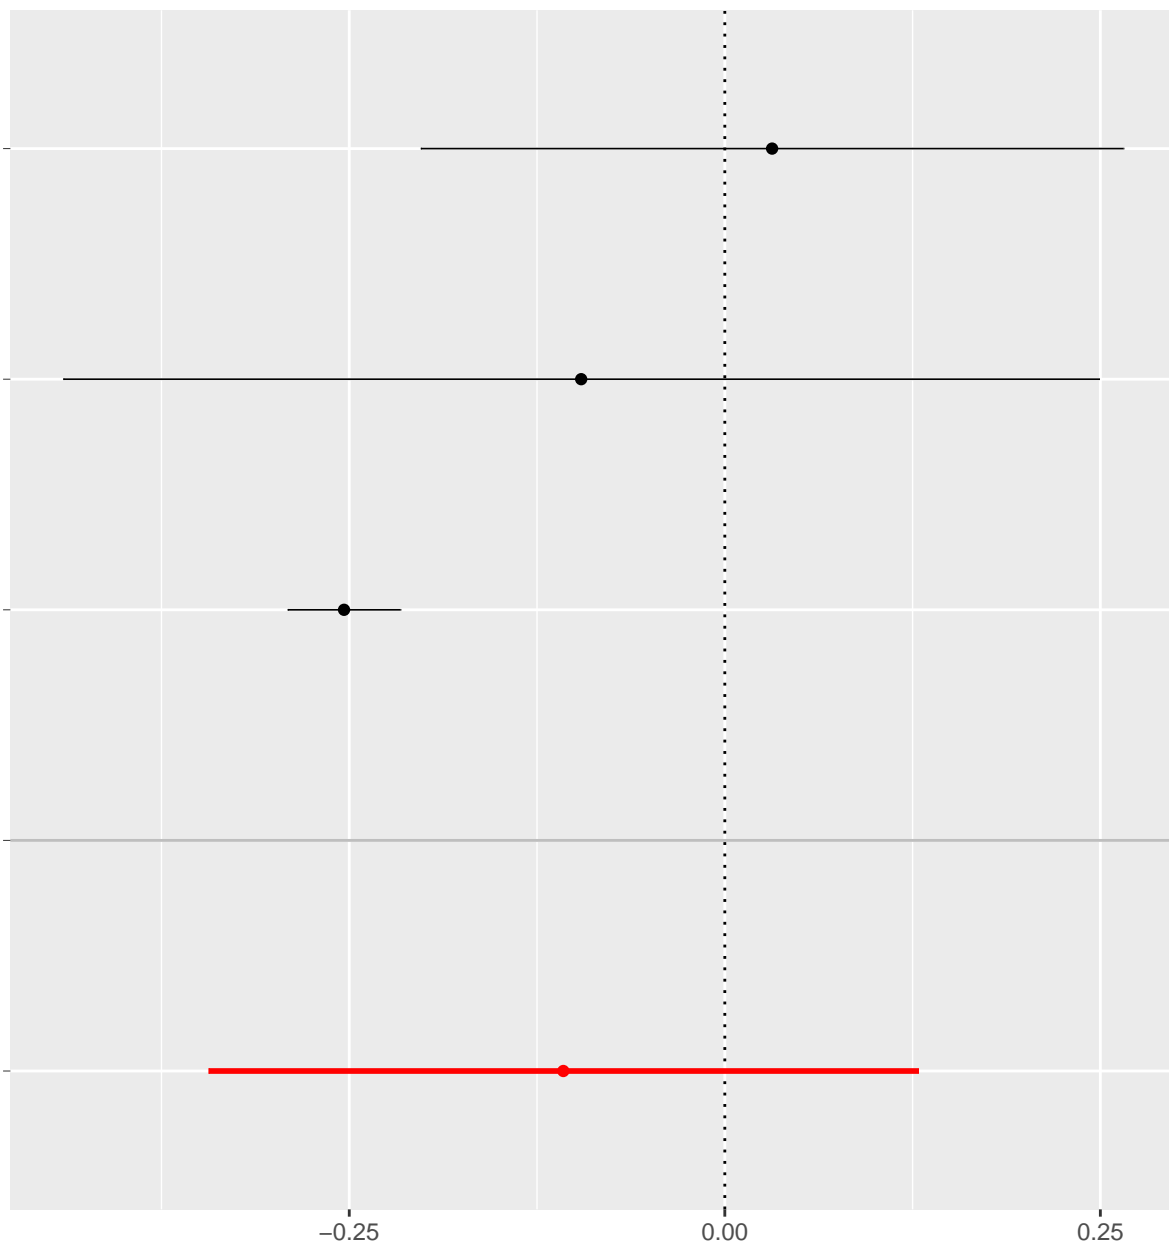

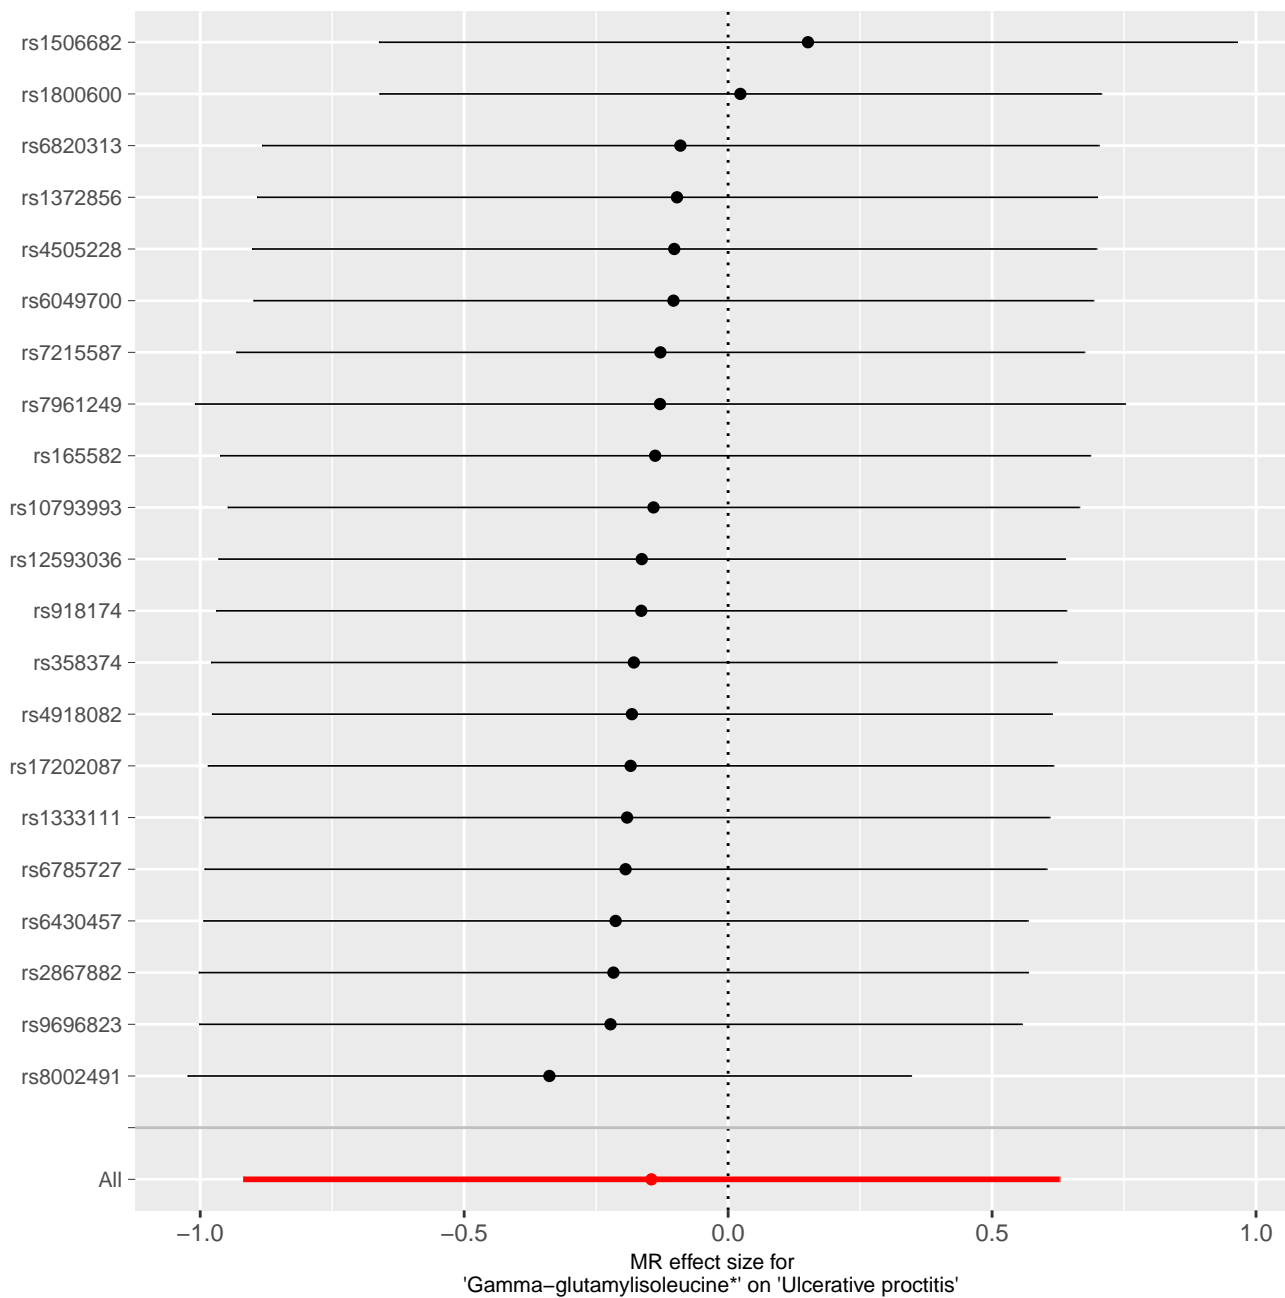

rs4680092

rs6907935

rs4861137

rs1456197

All

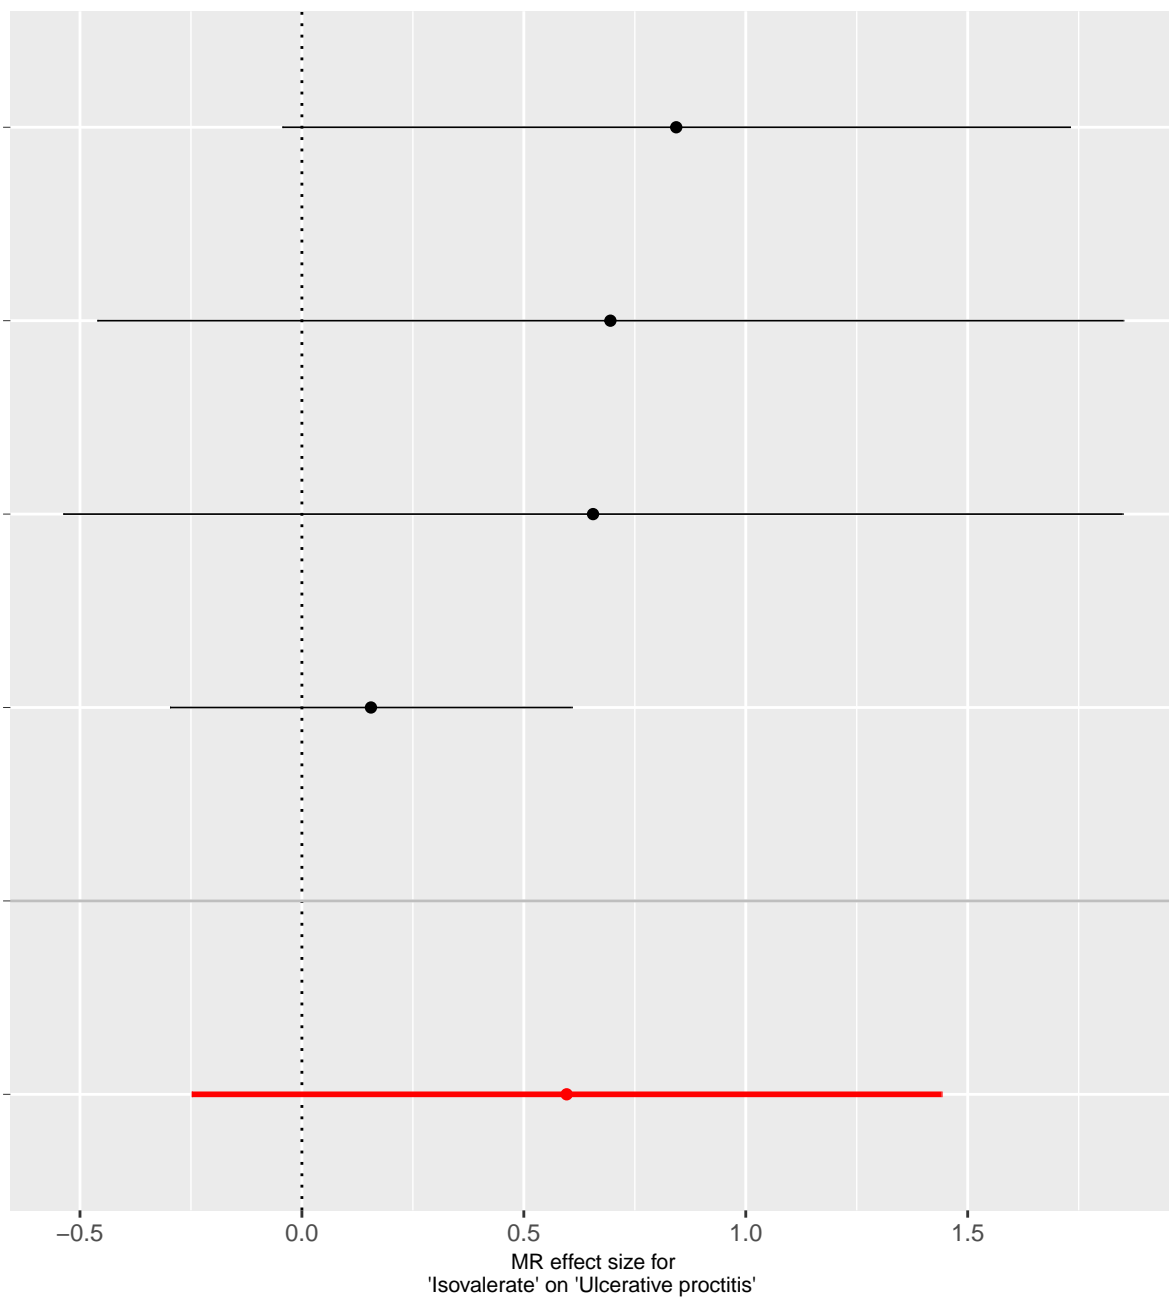

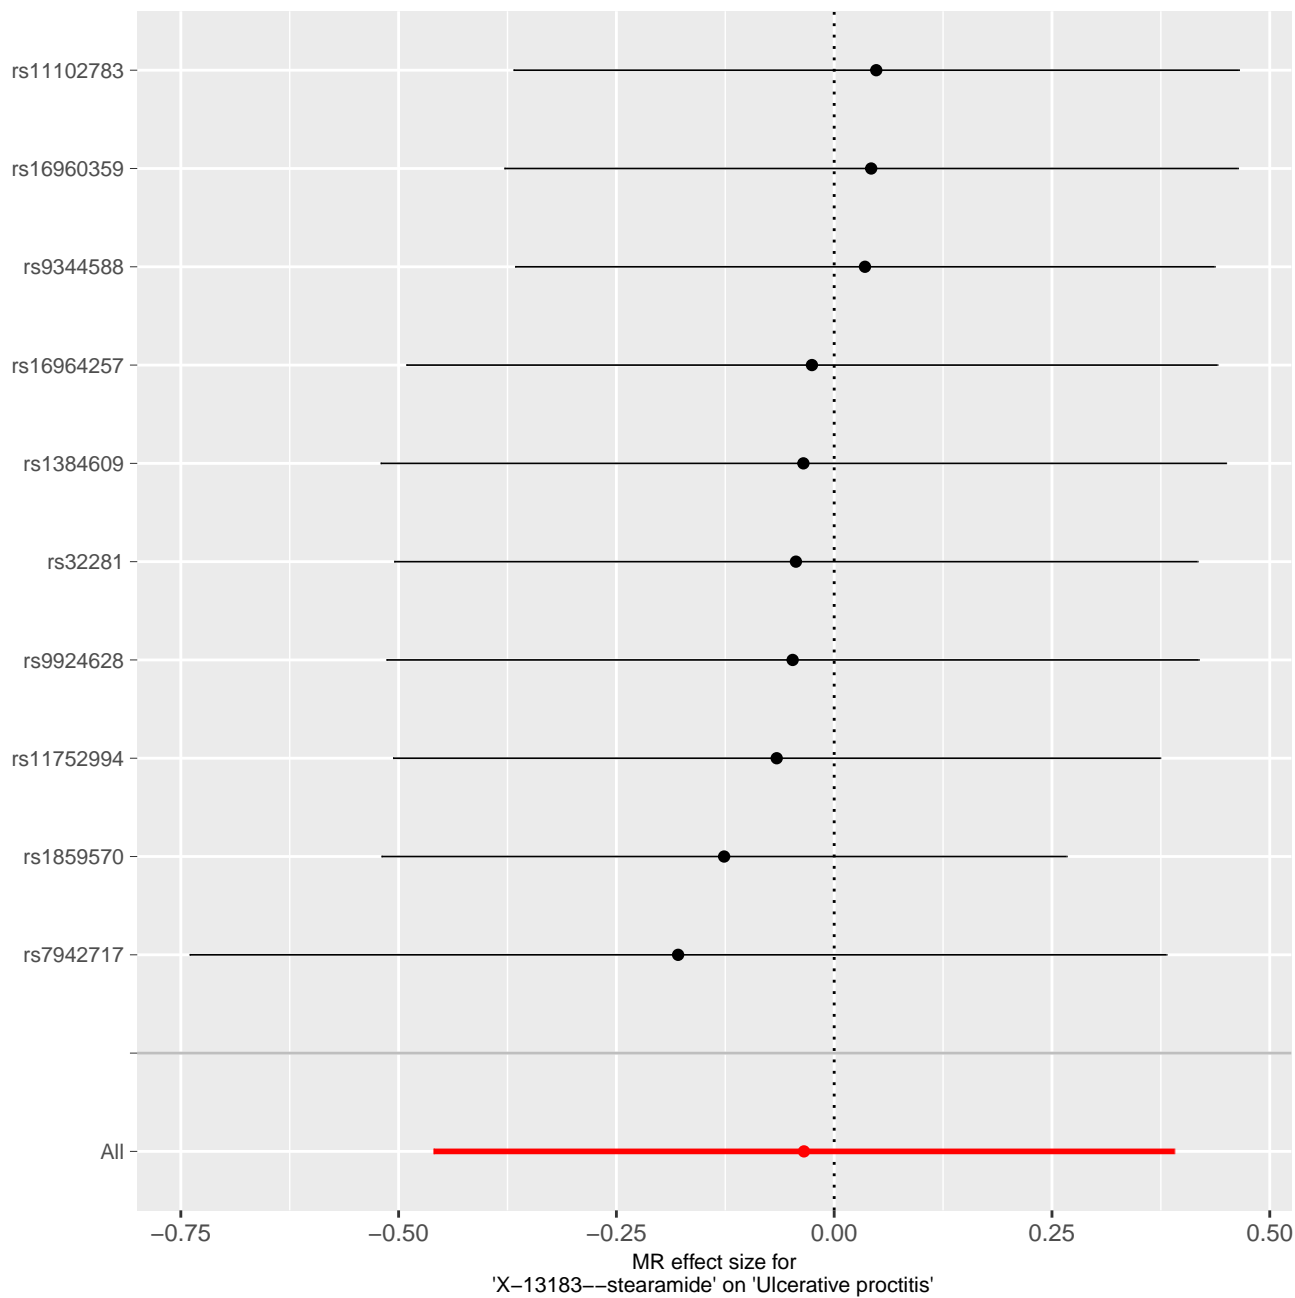



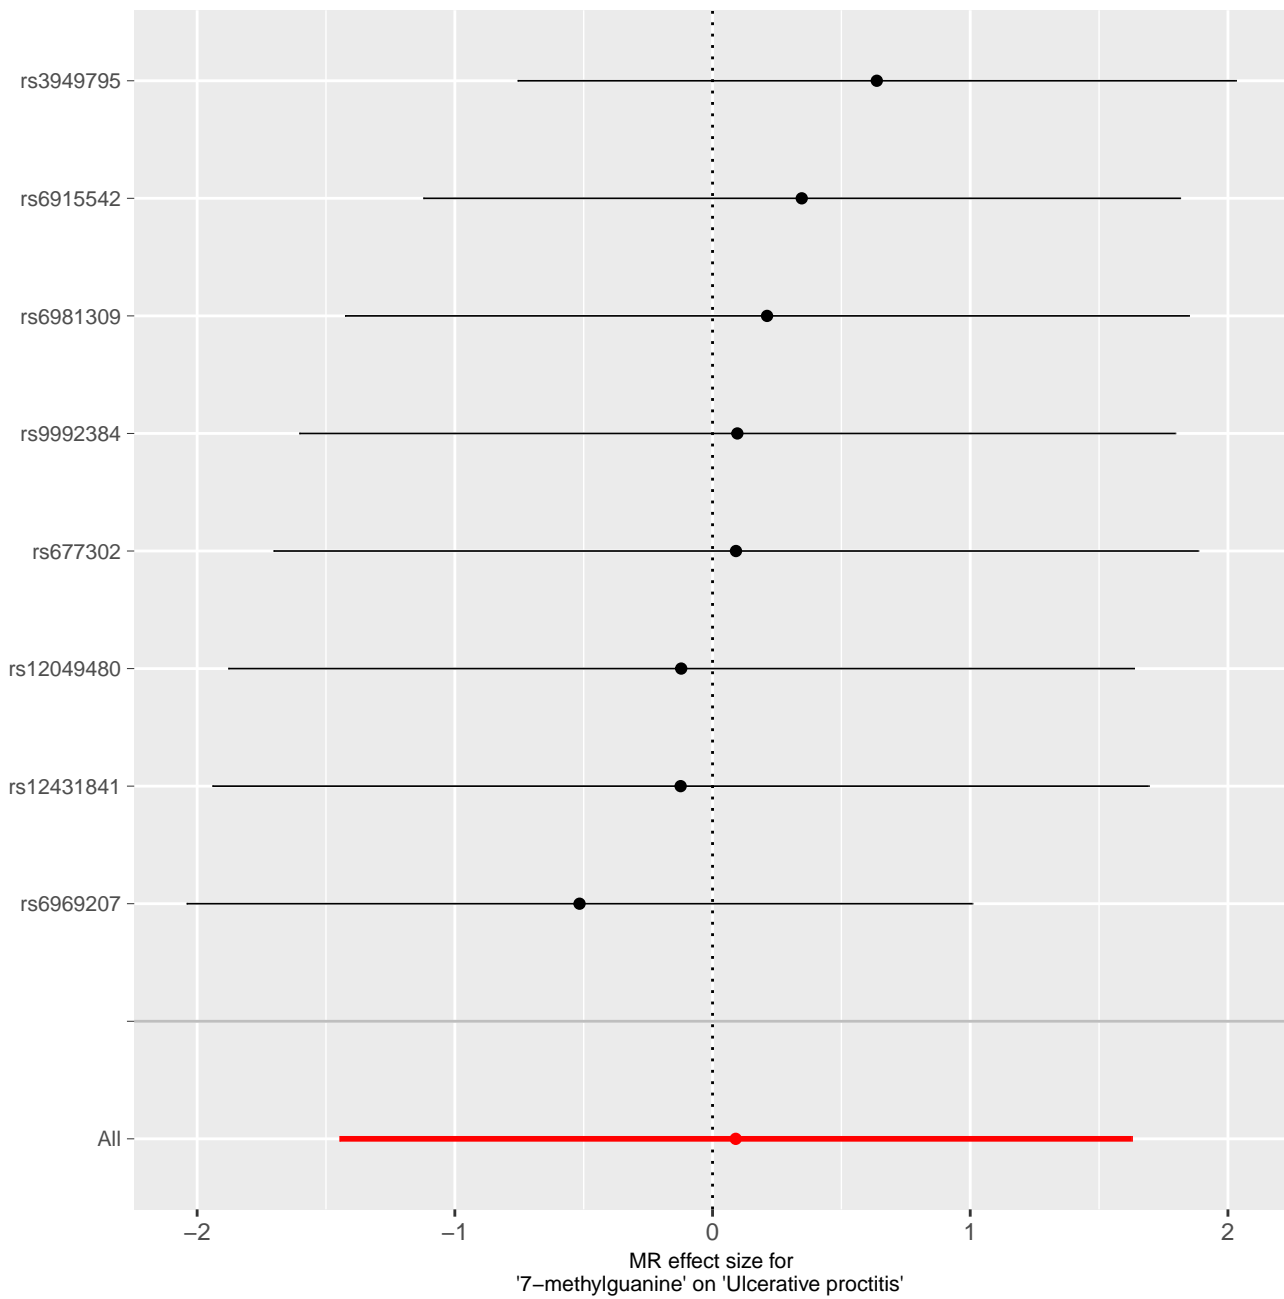

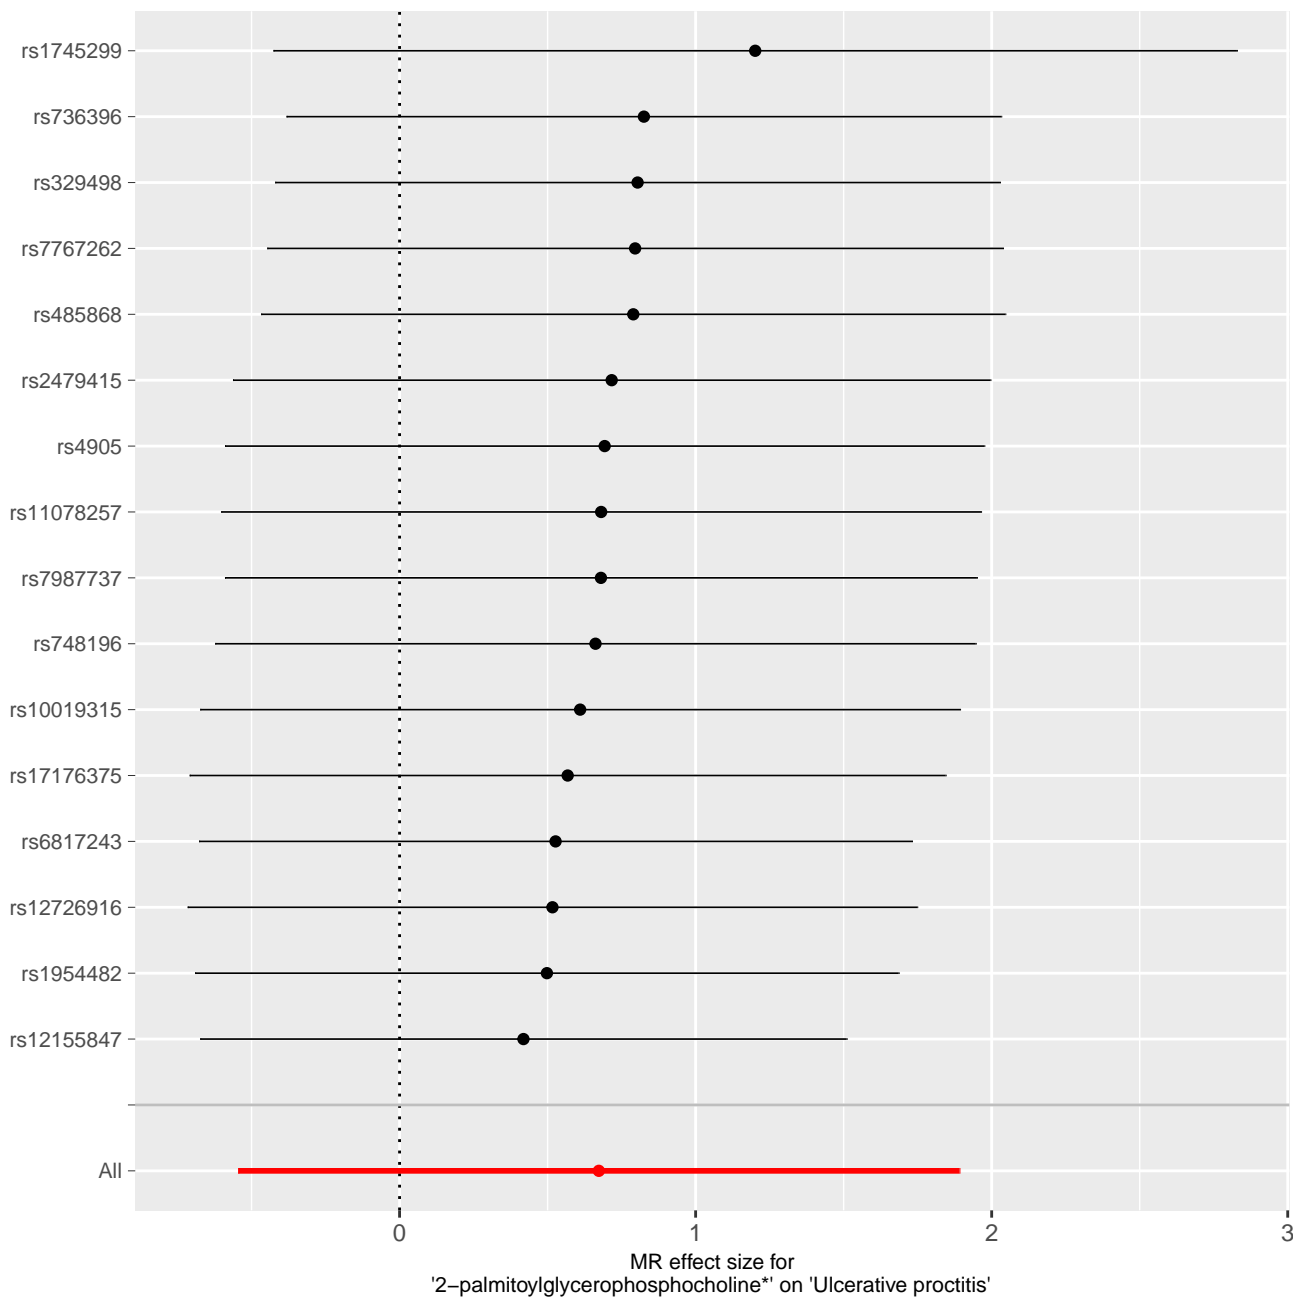

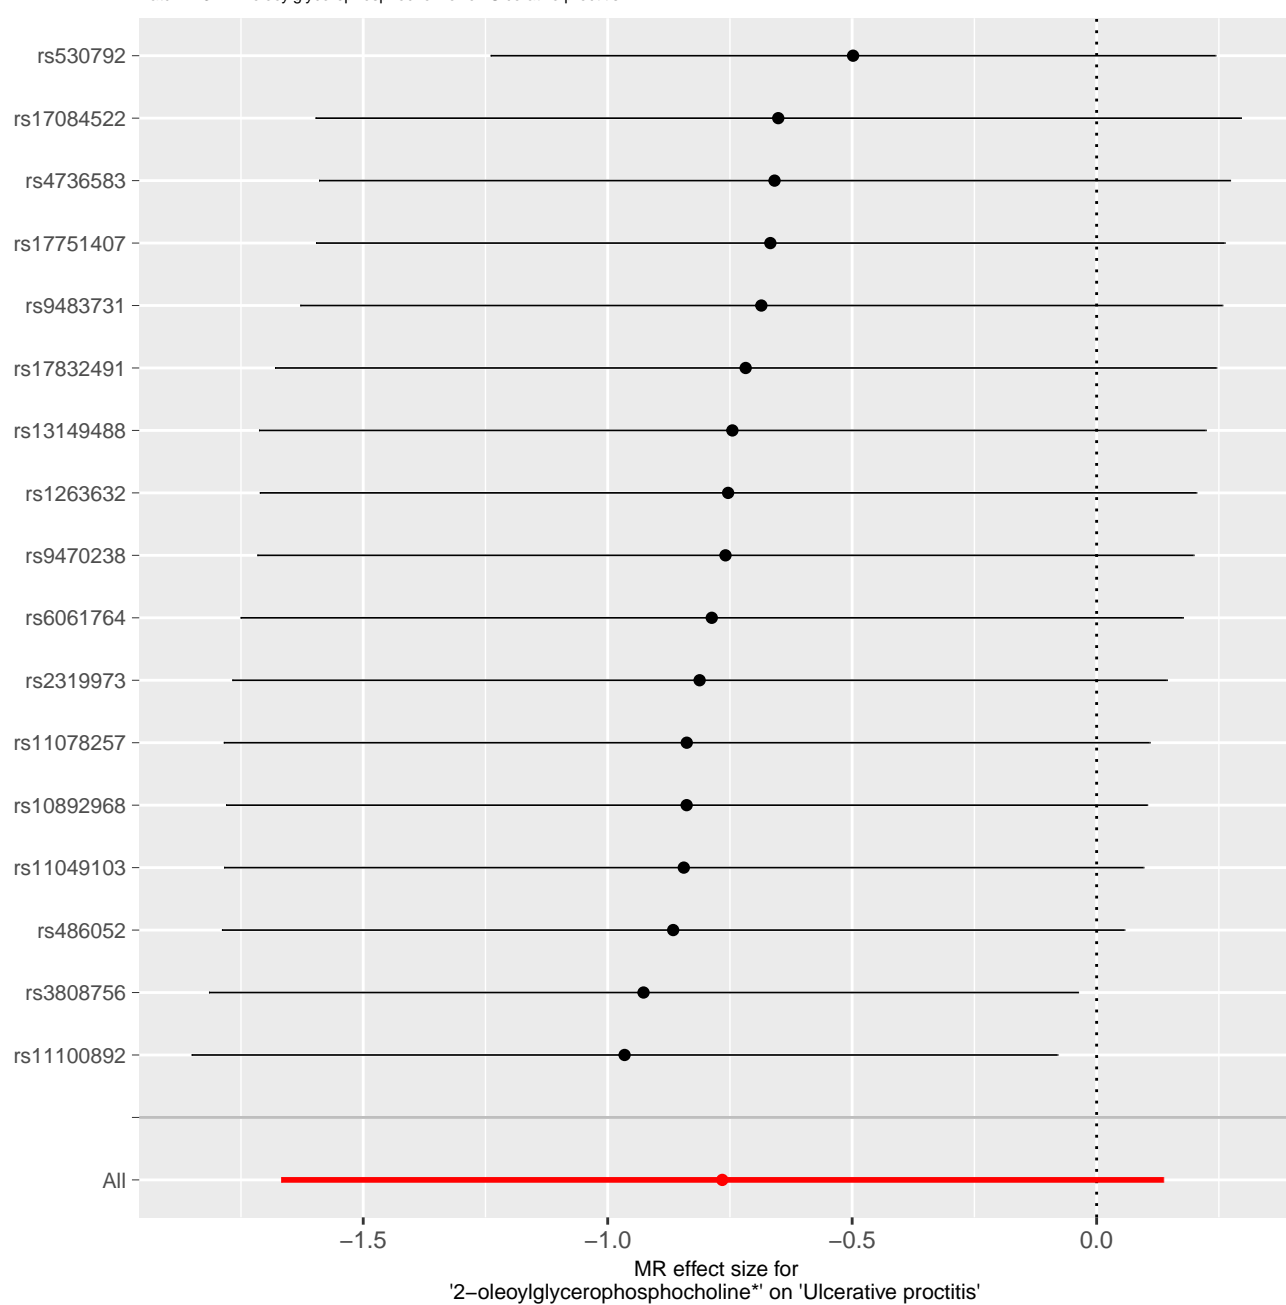

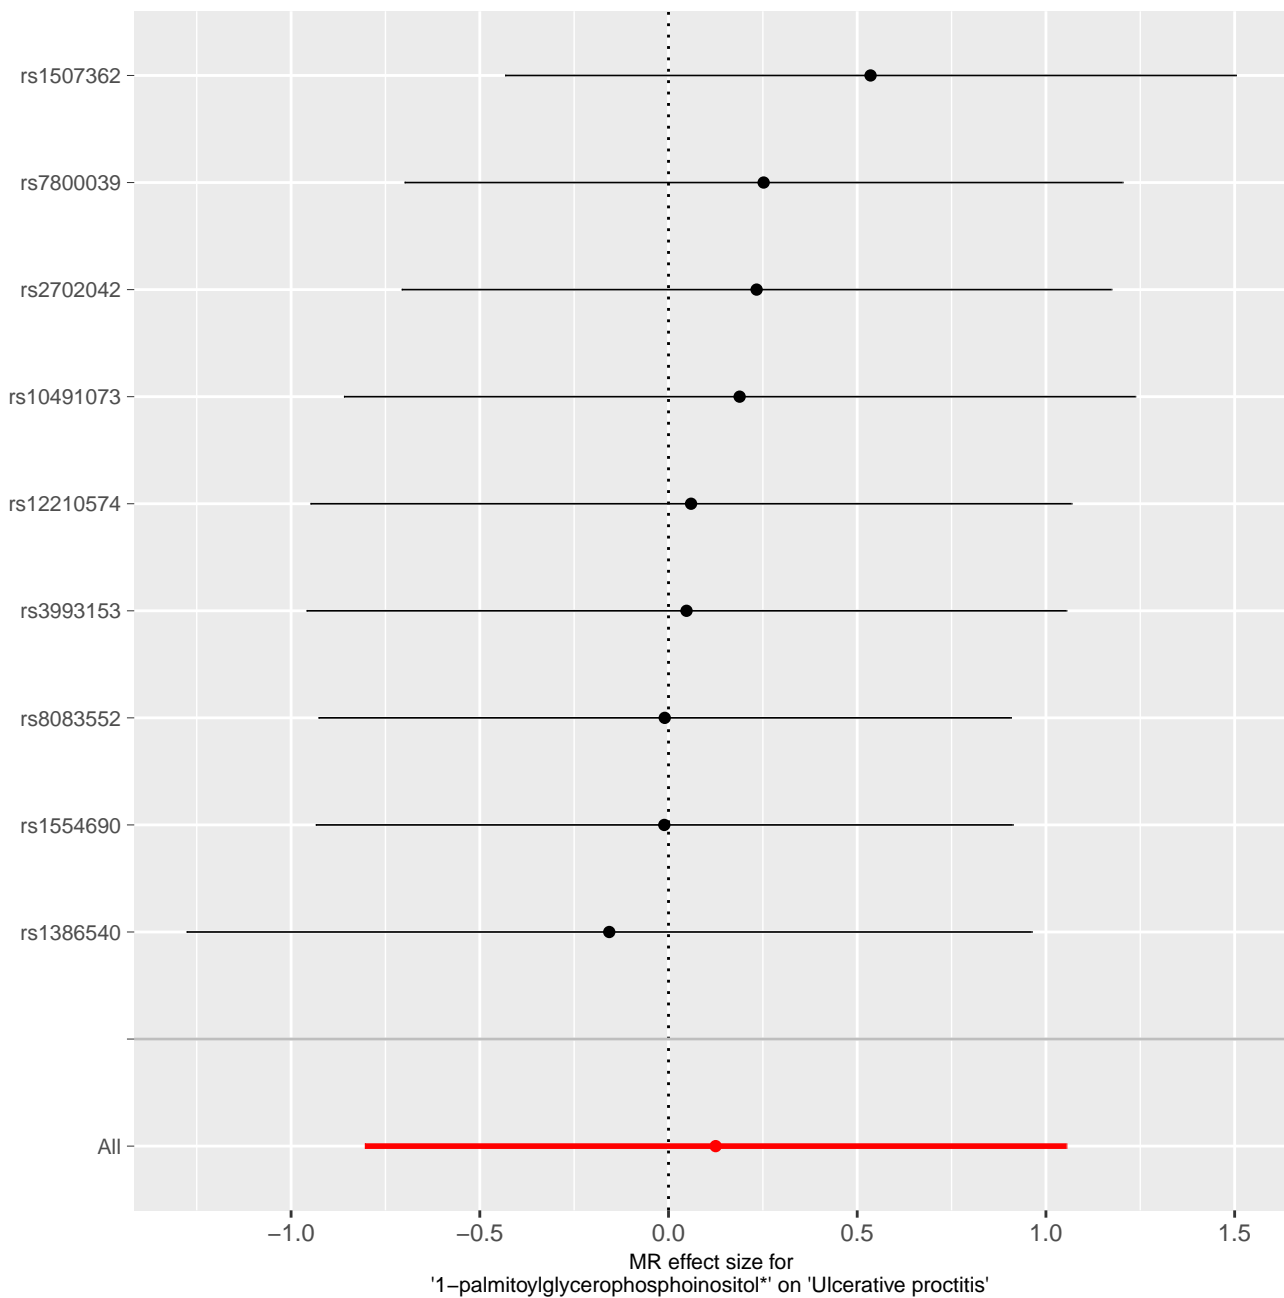

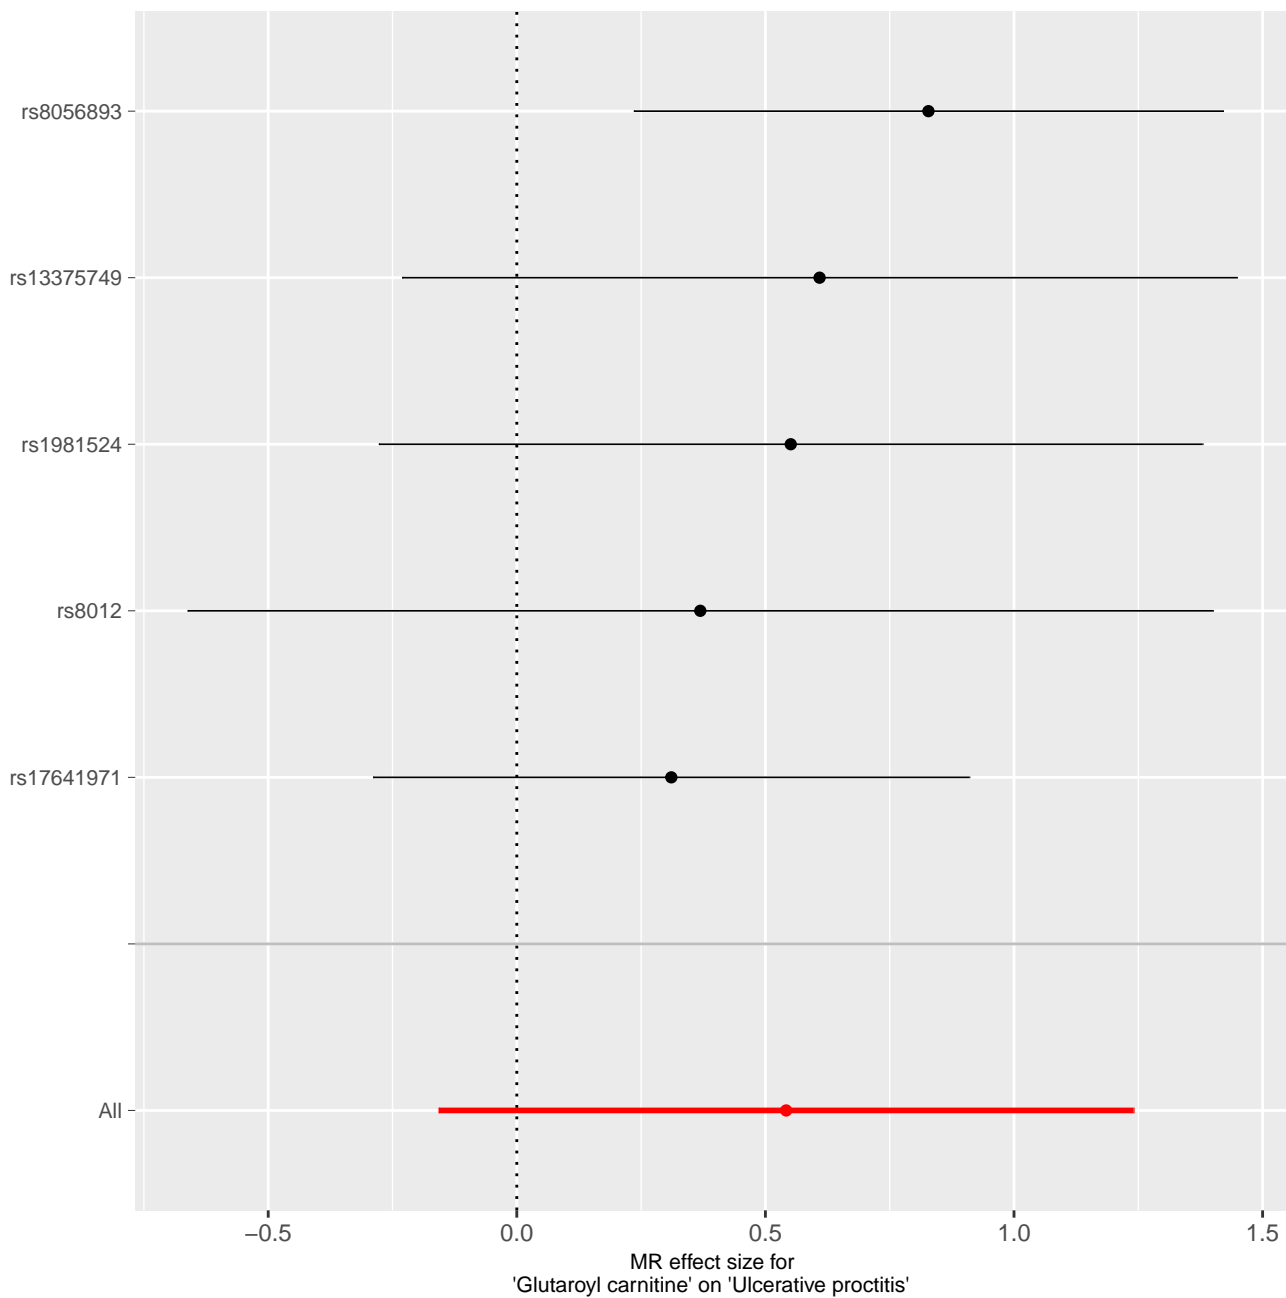

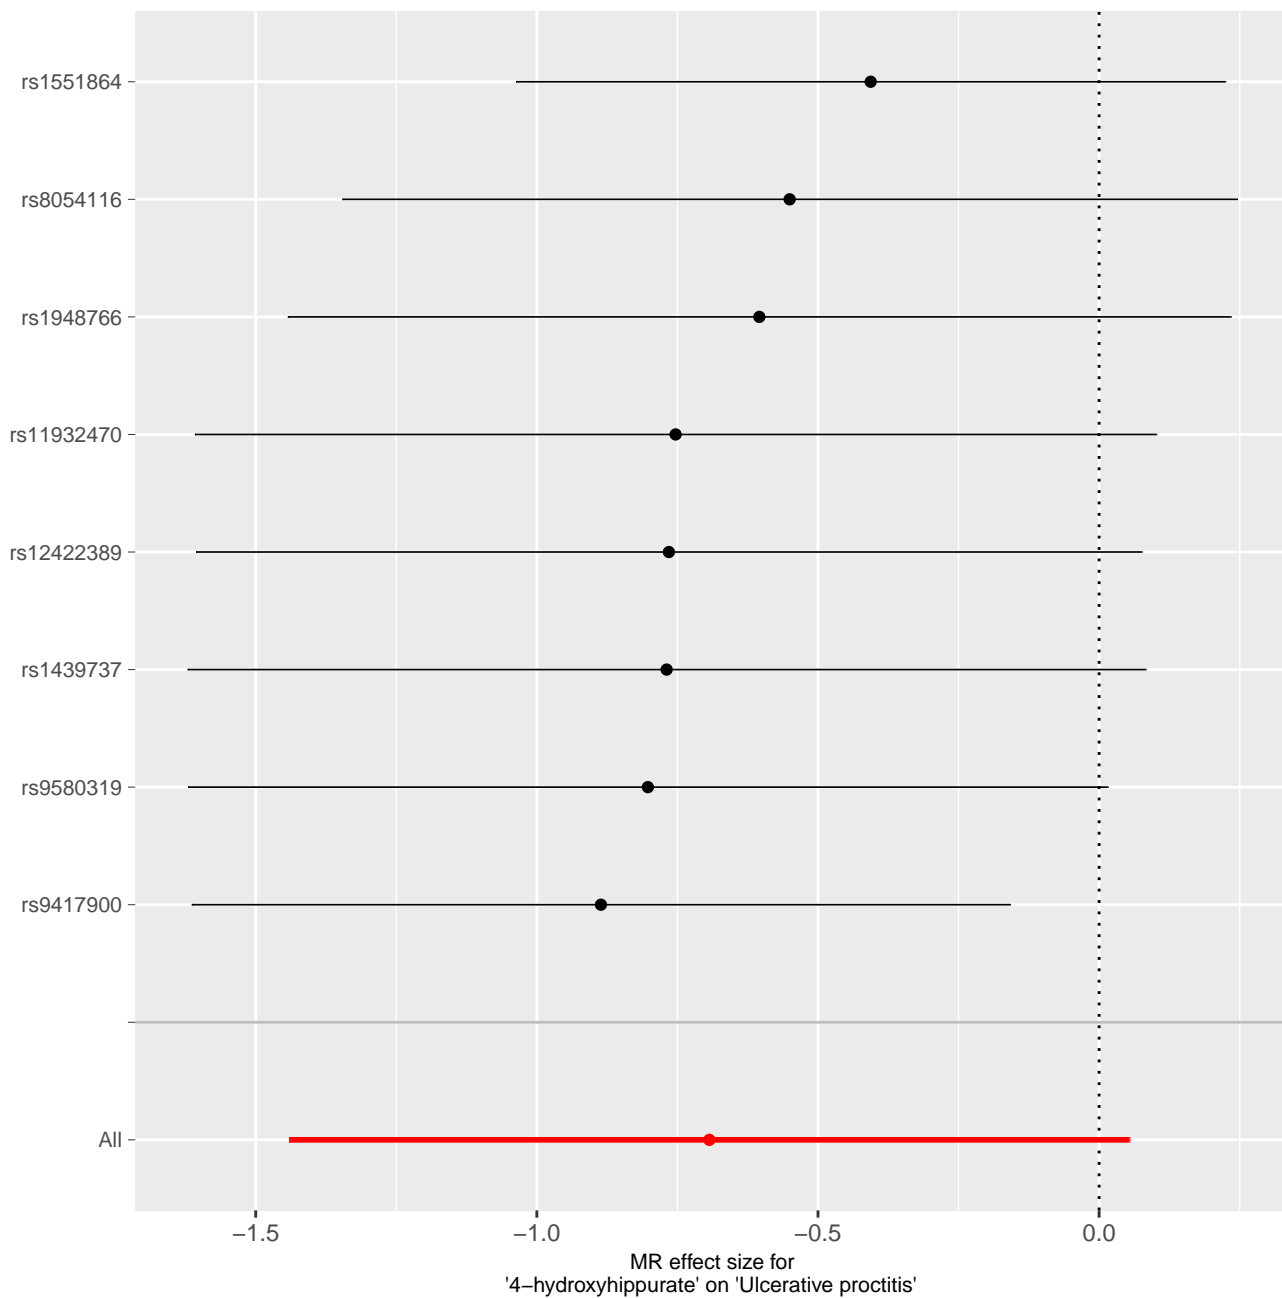

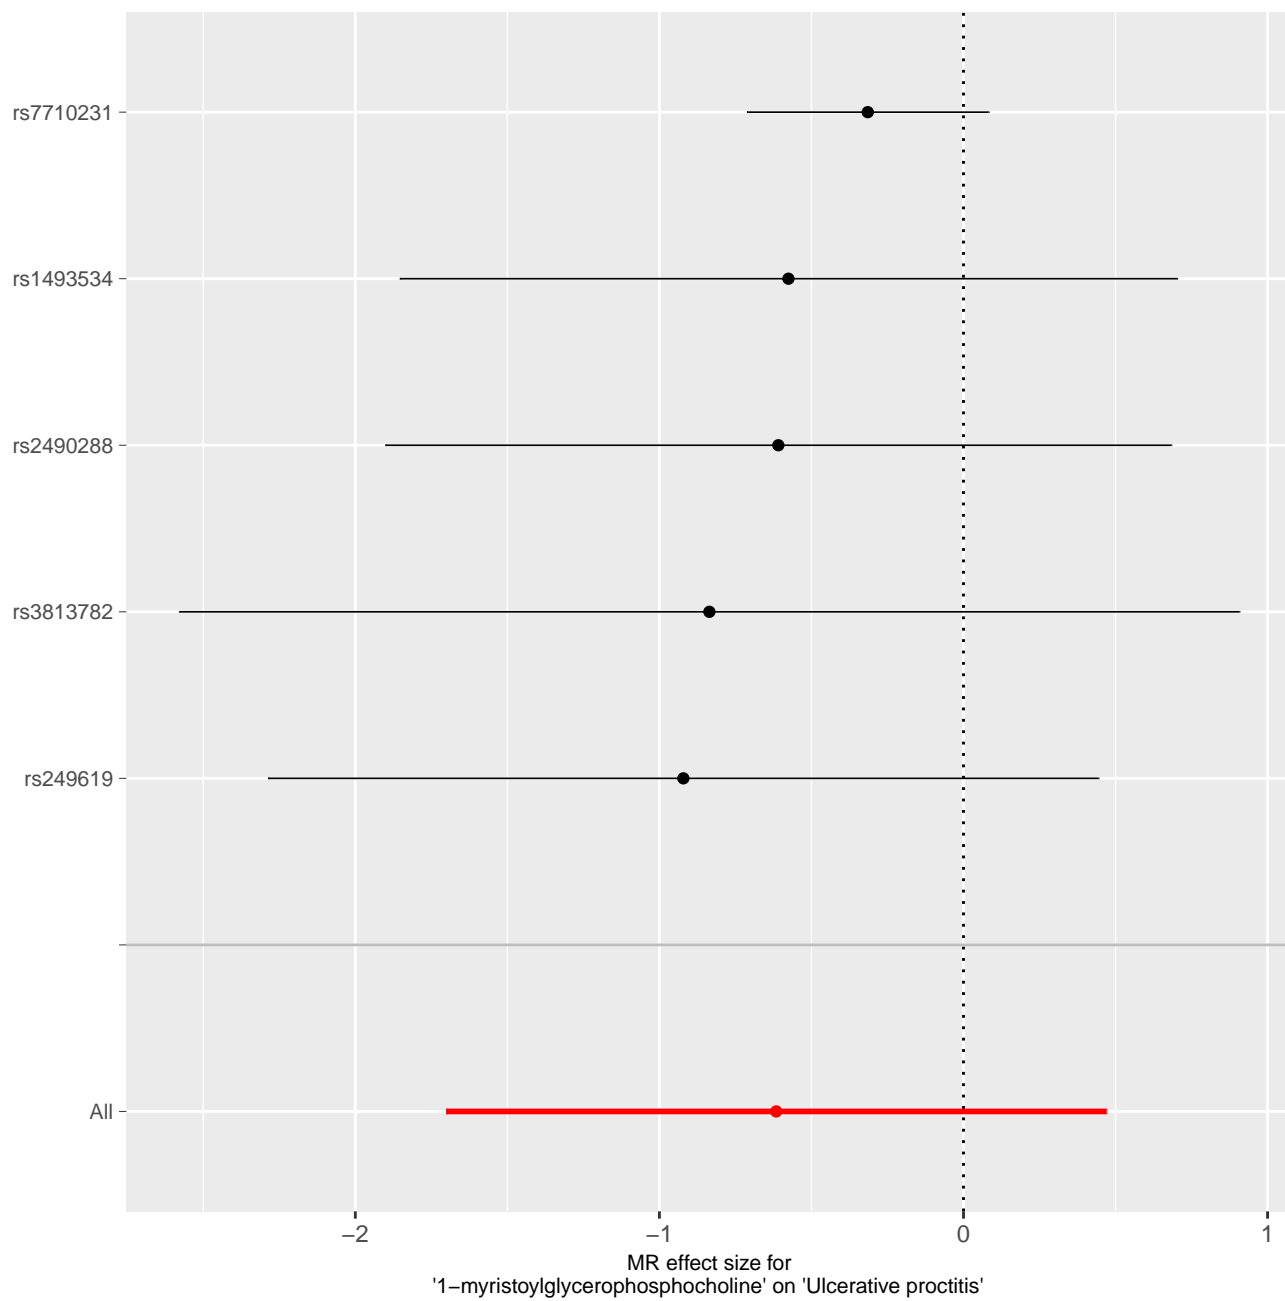

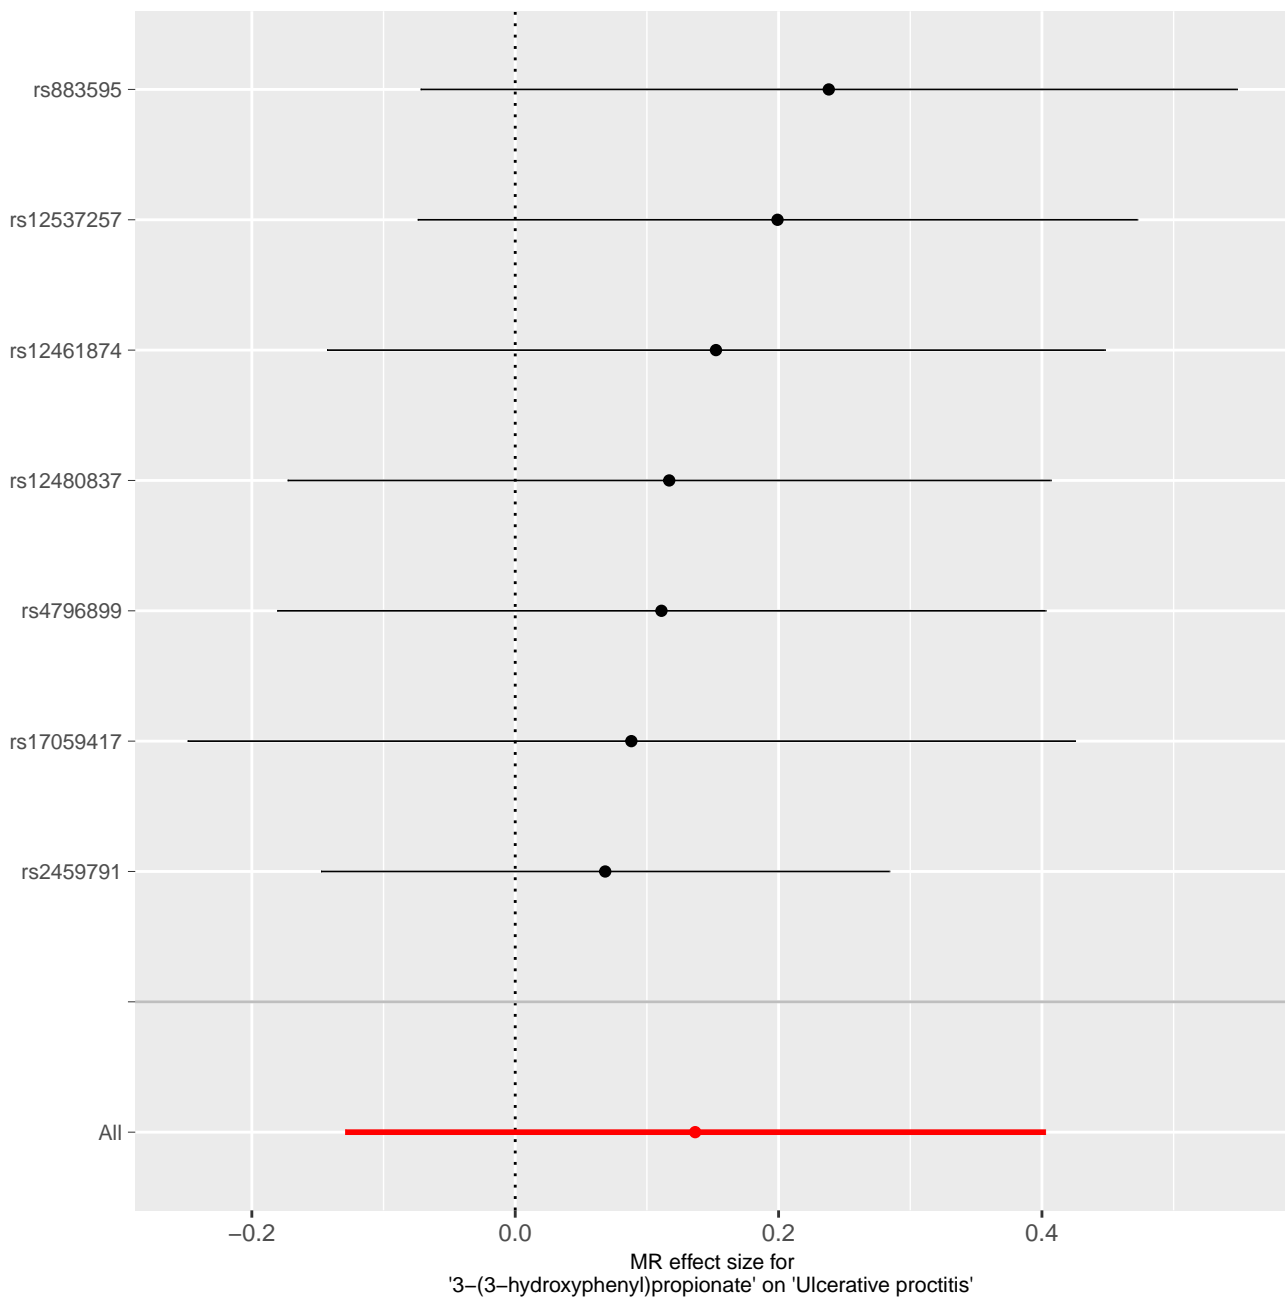



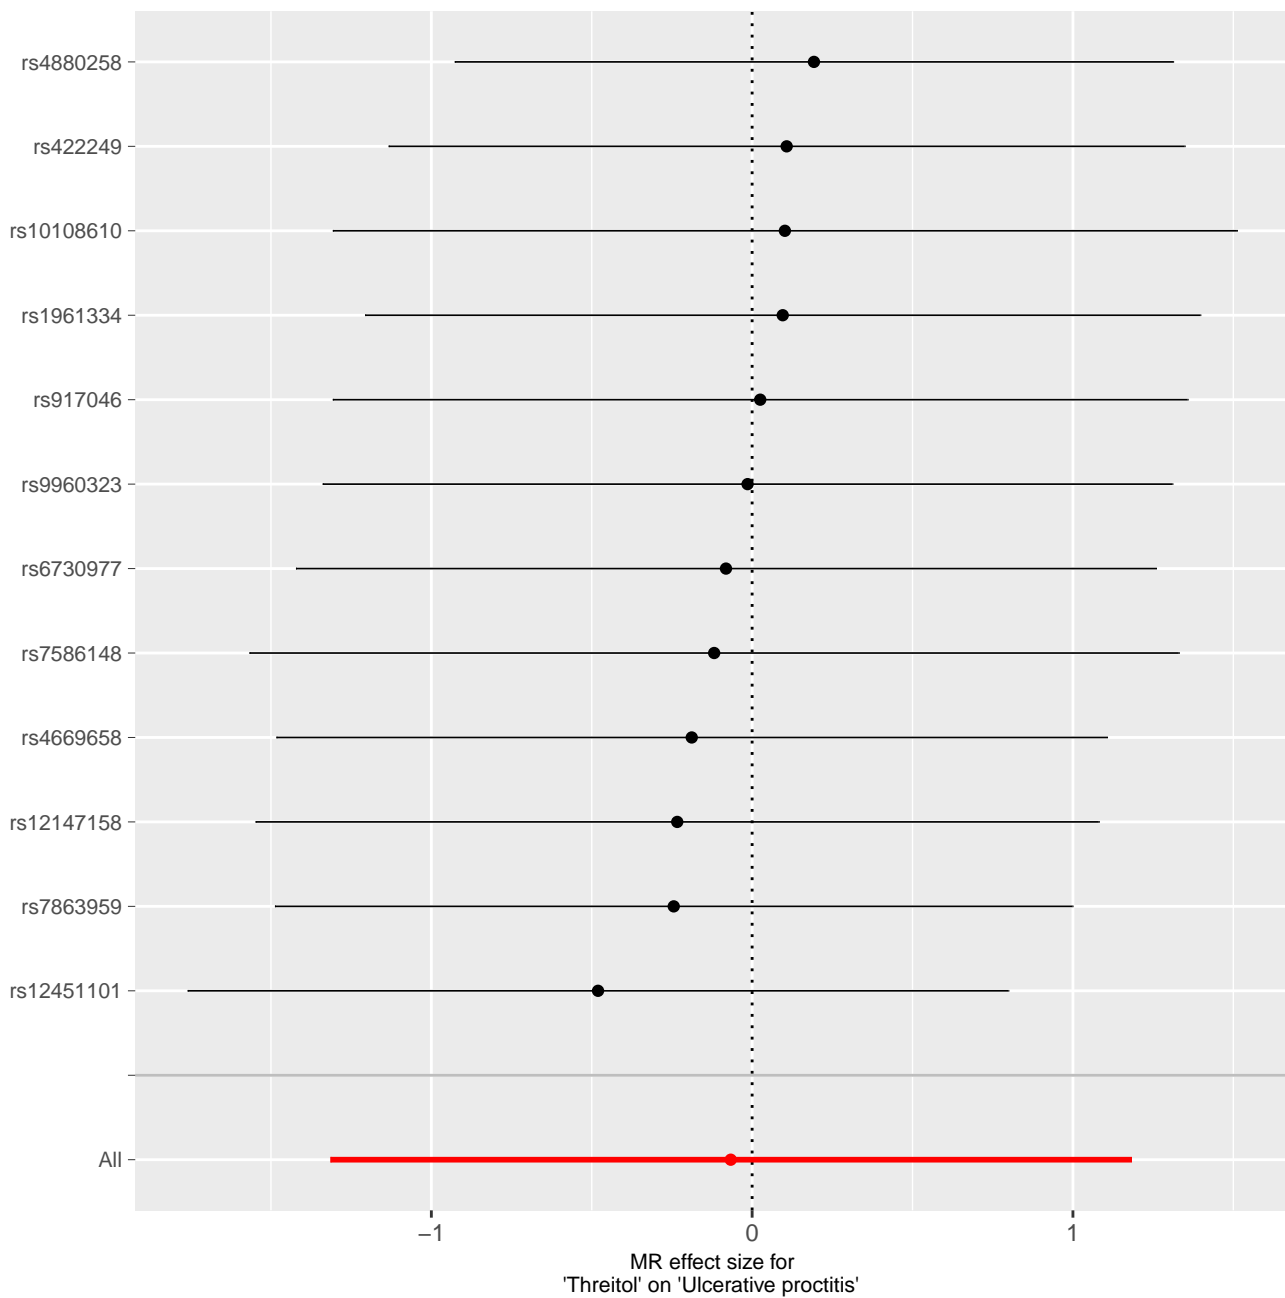

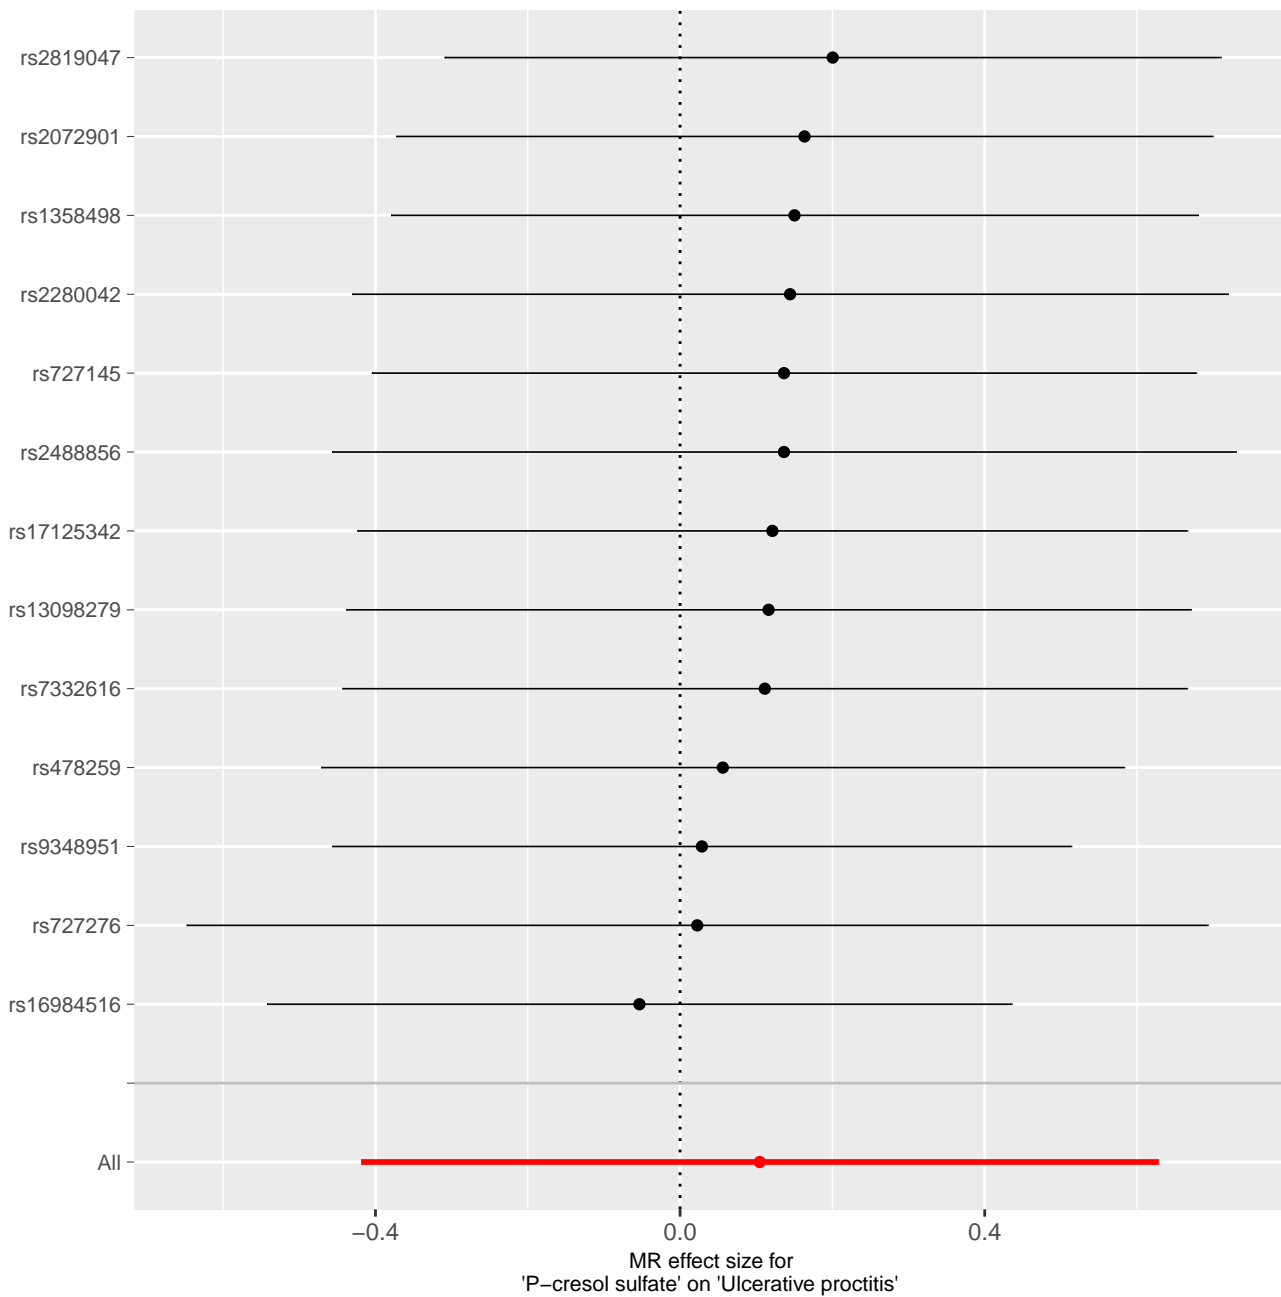

rs2874702

rs1893285

rs1192458

rs7021014

All

-1

0

1

2

MR effect size for  
'X-14450--phenylalanylleucine' on 'Ulcerative proctitis'

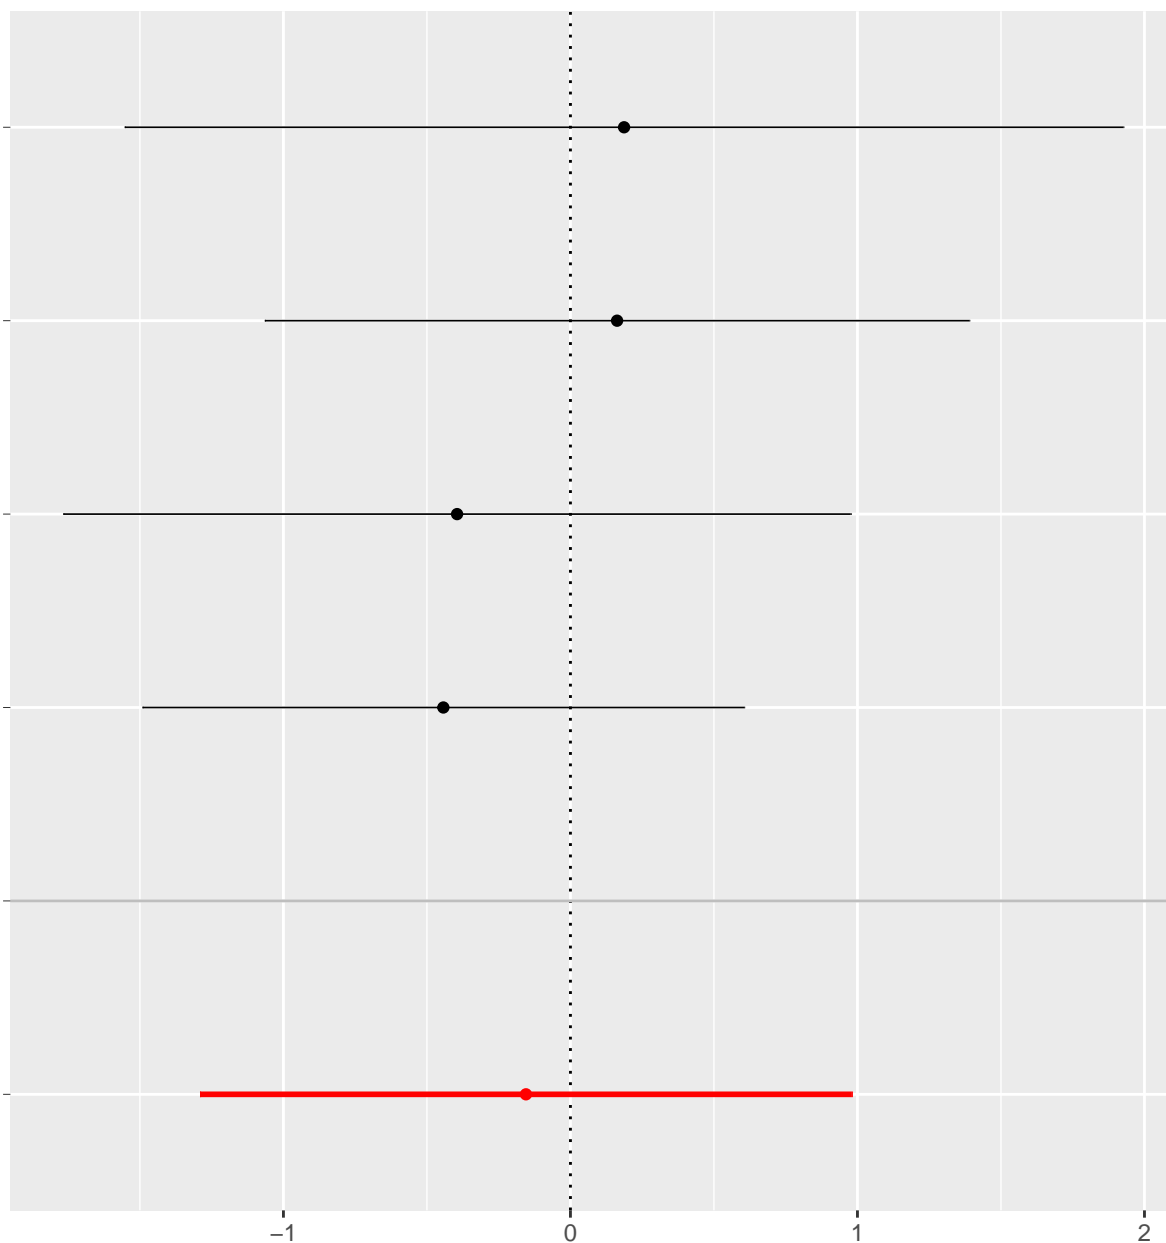

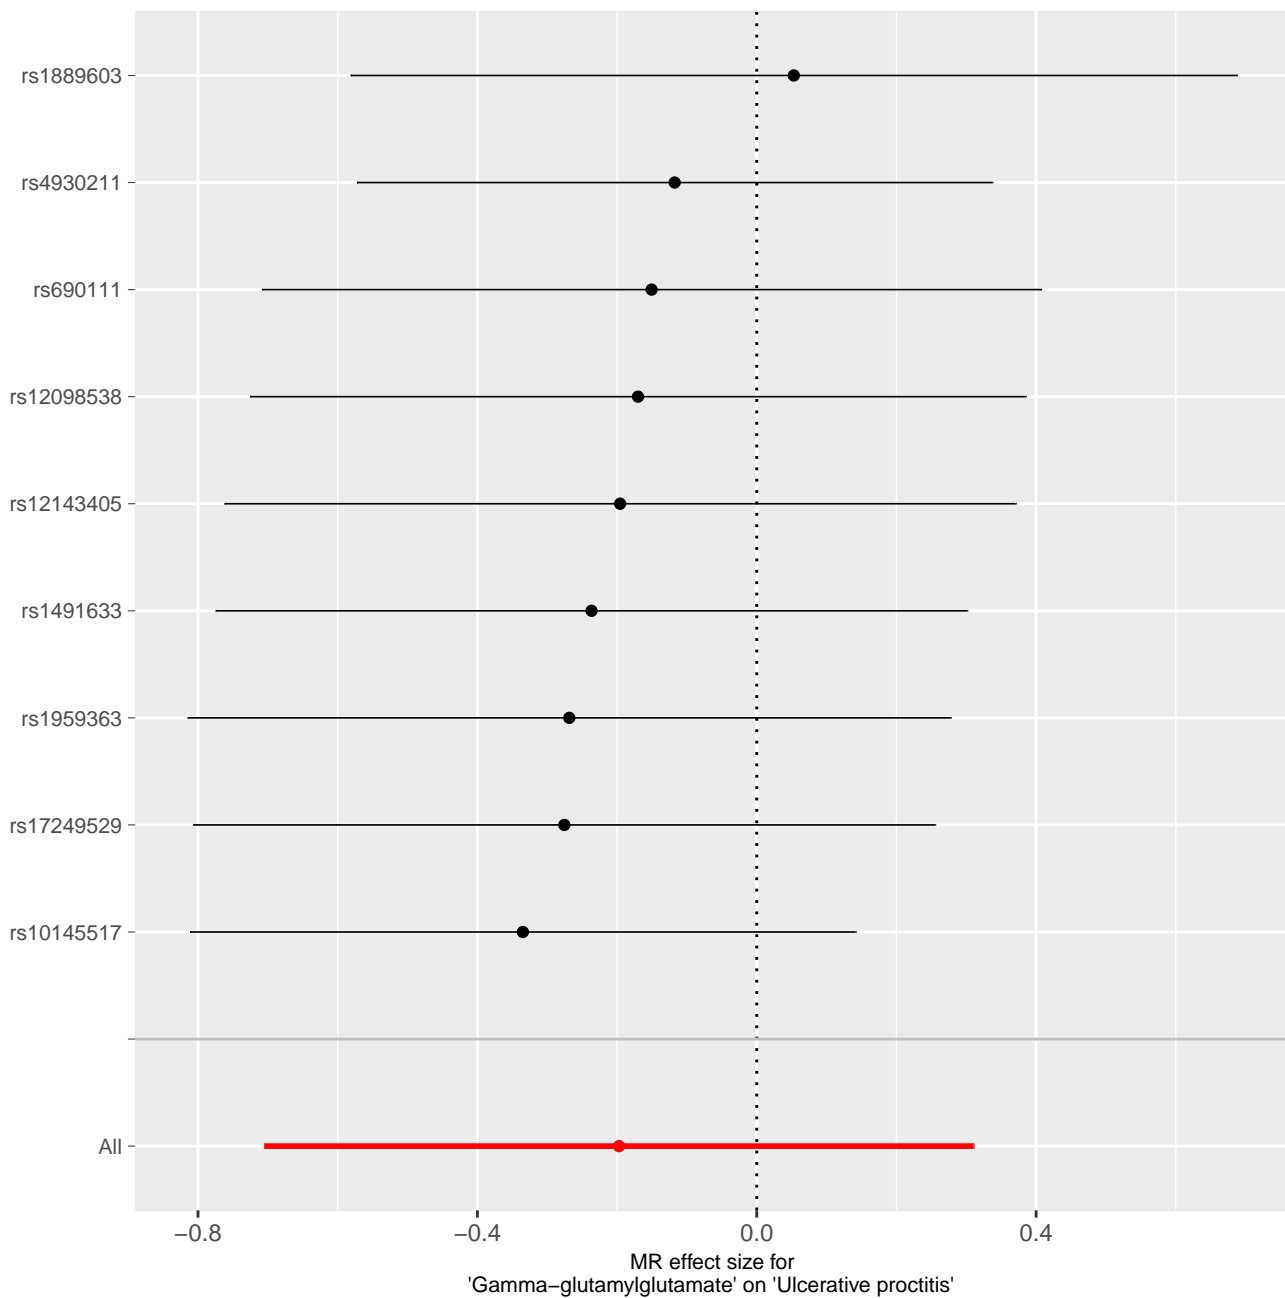

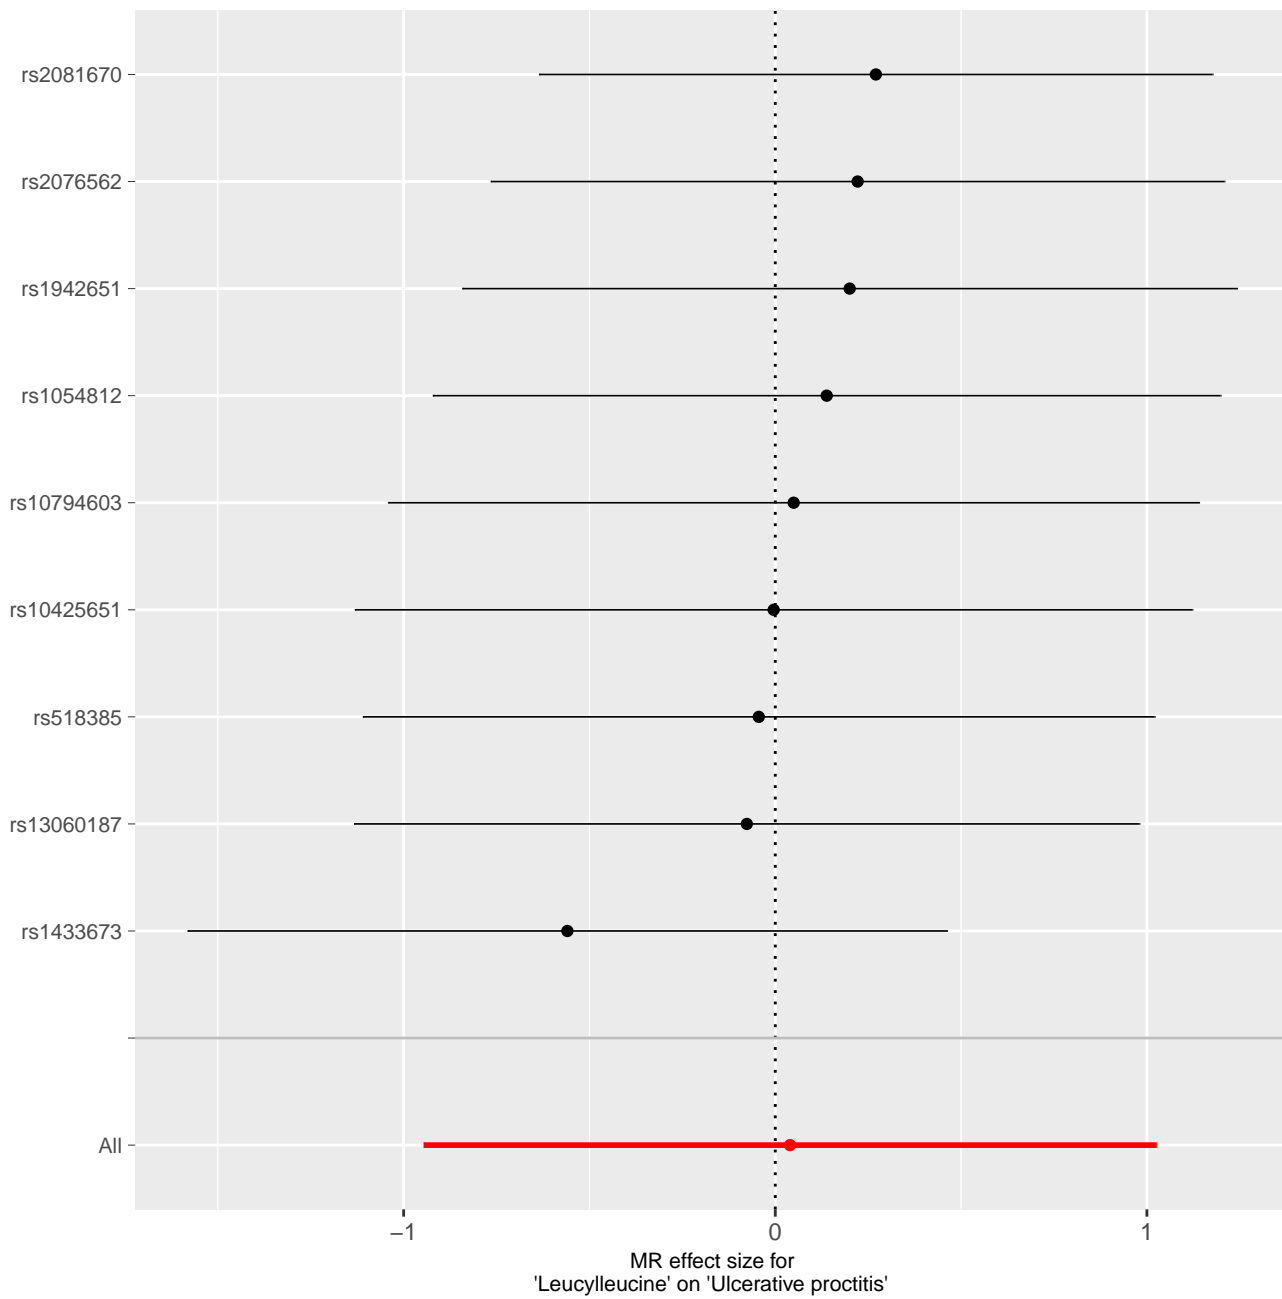

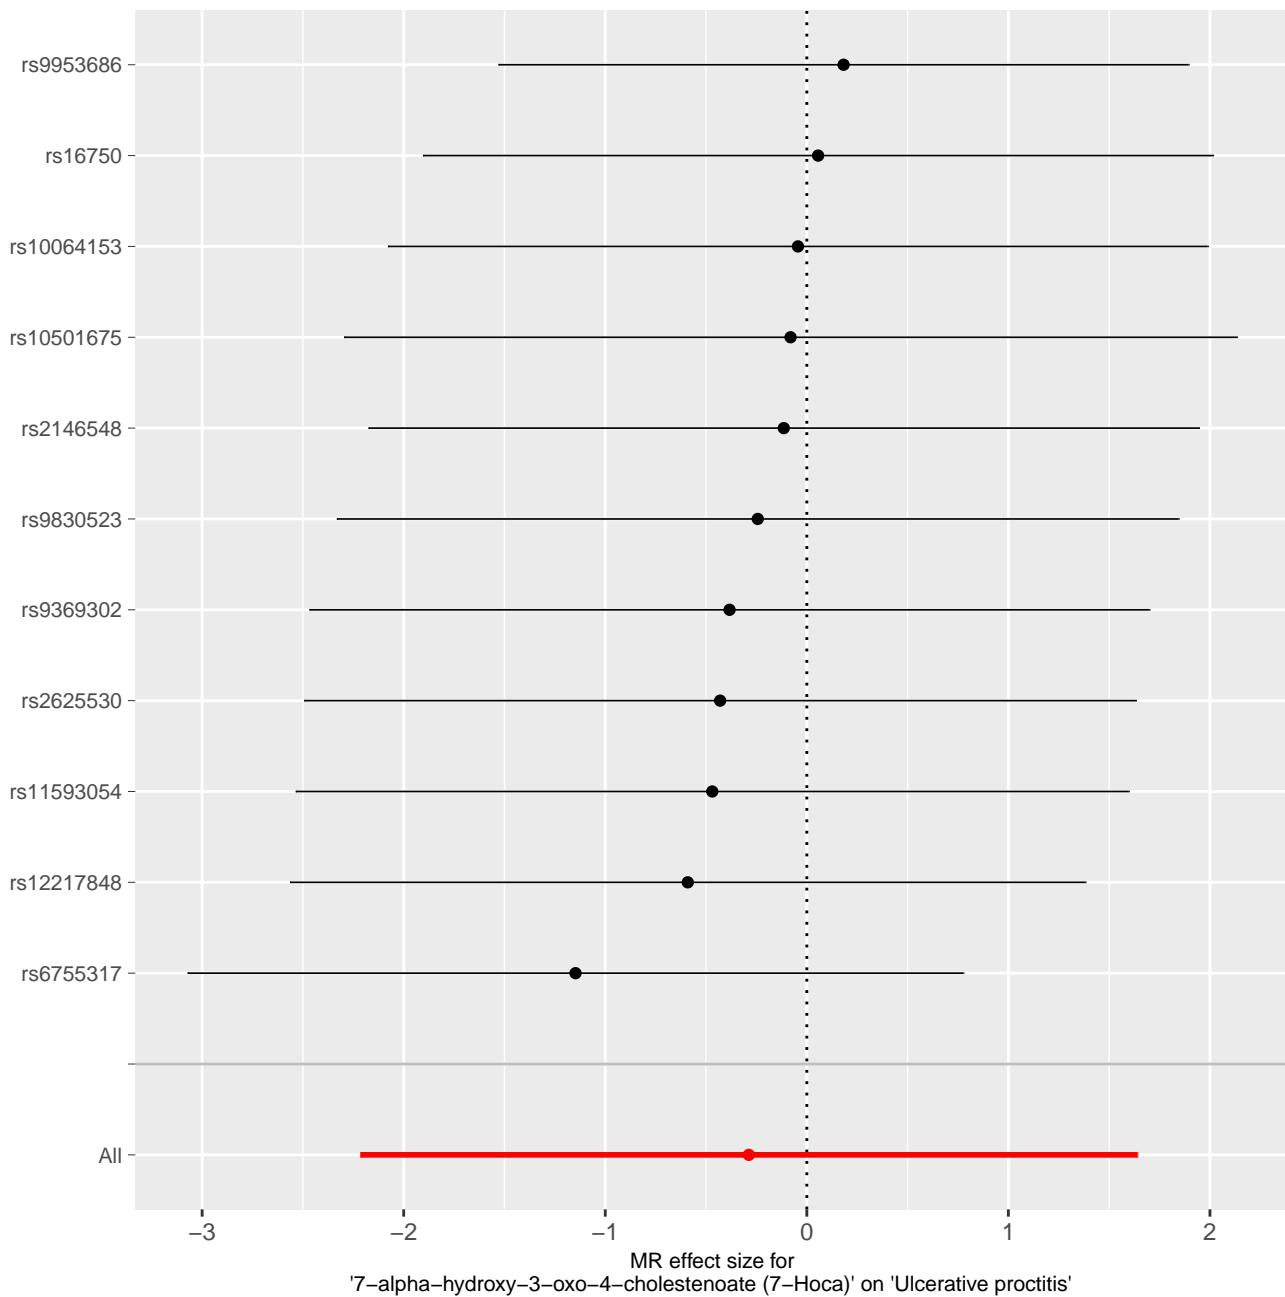

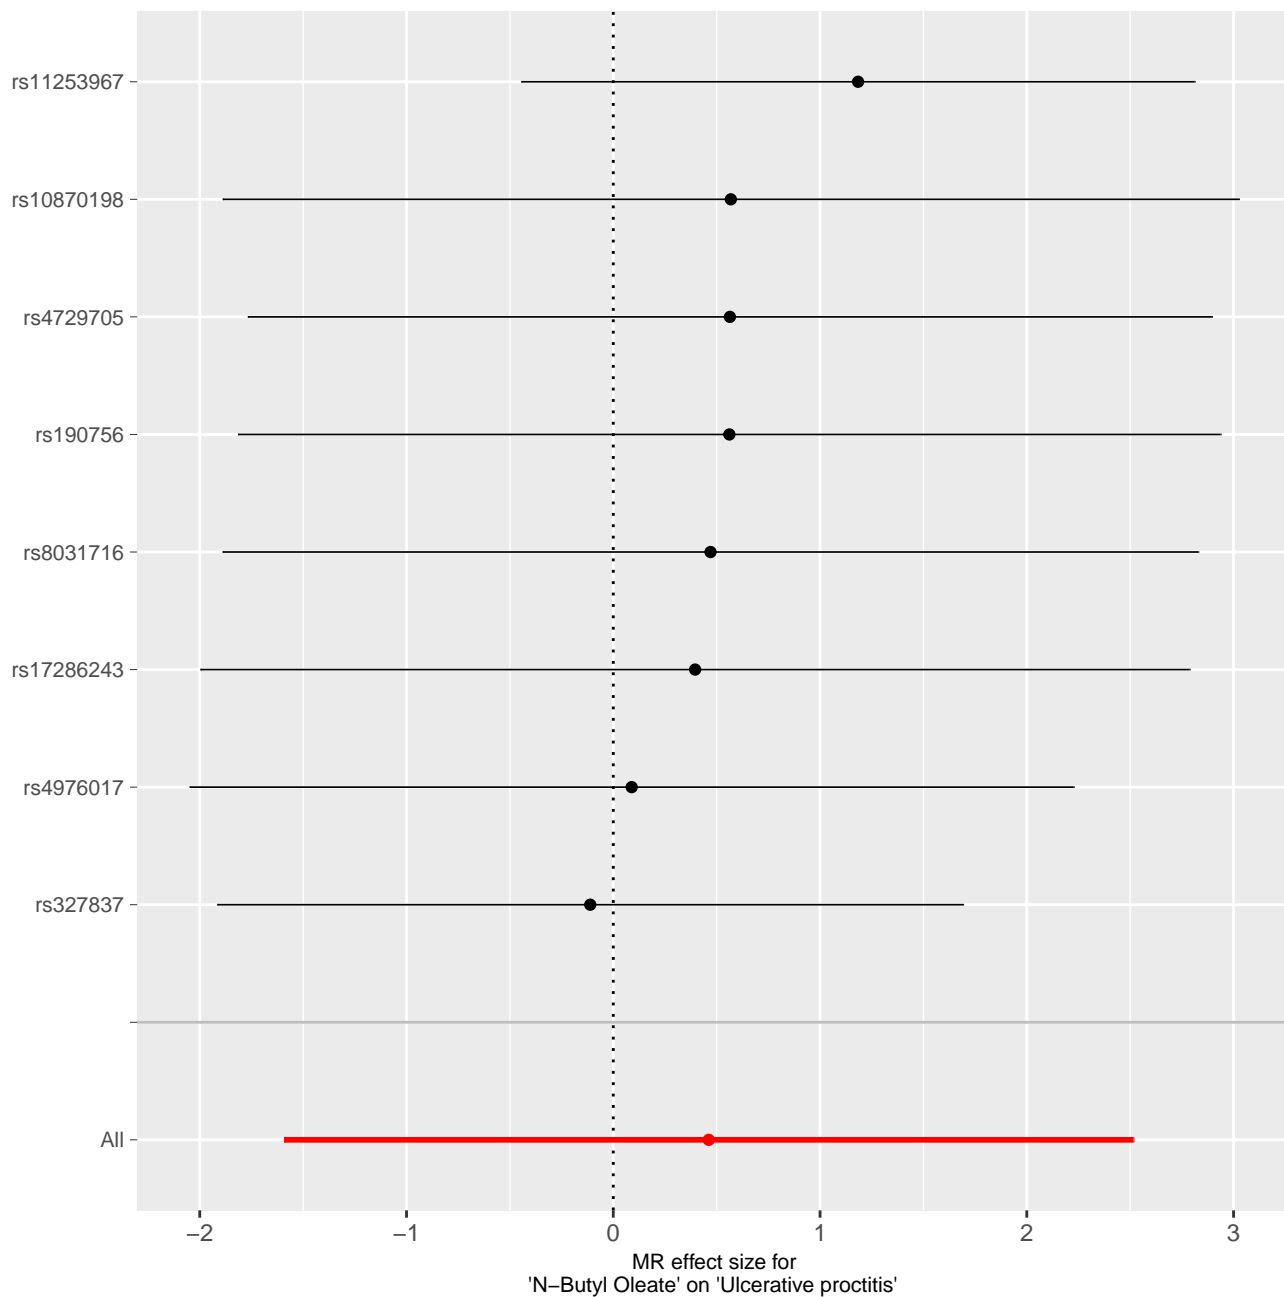

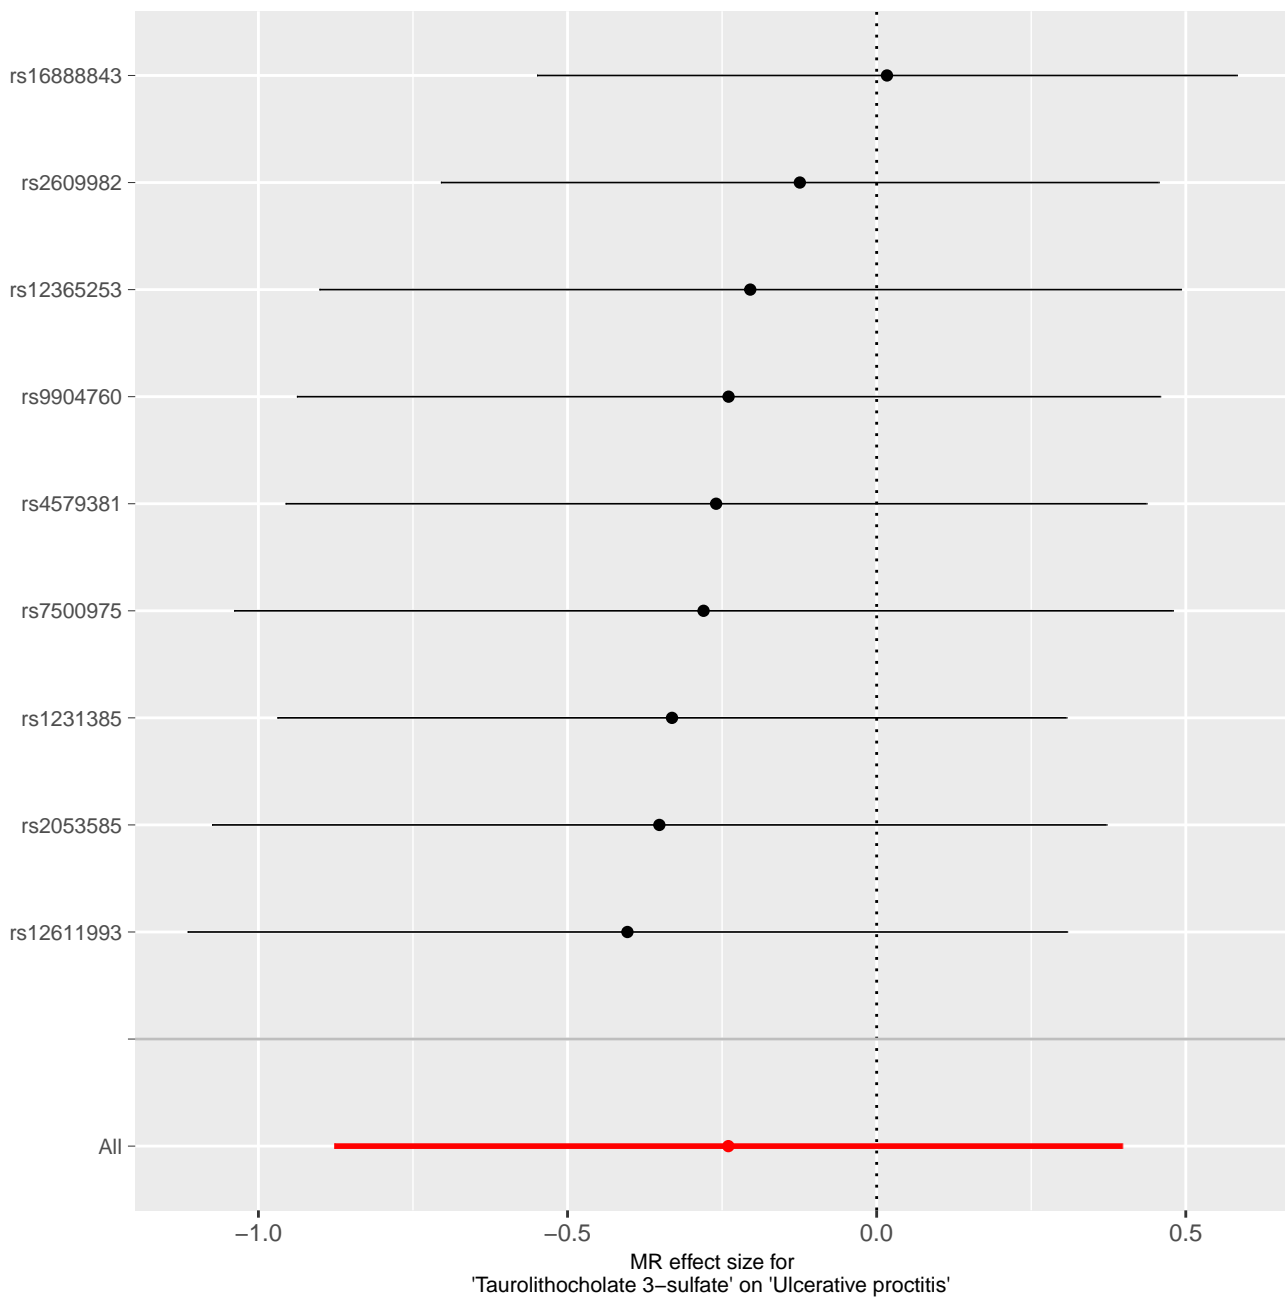



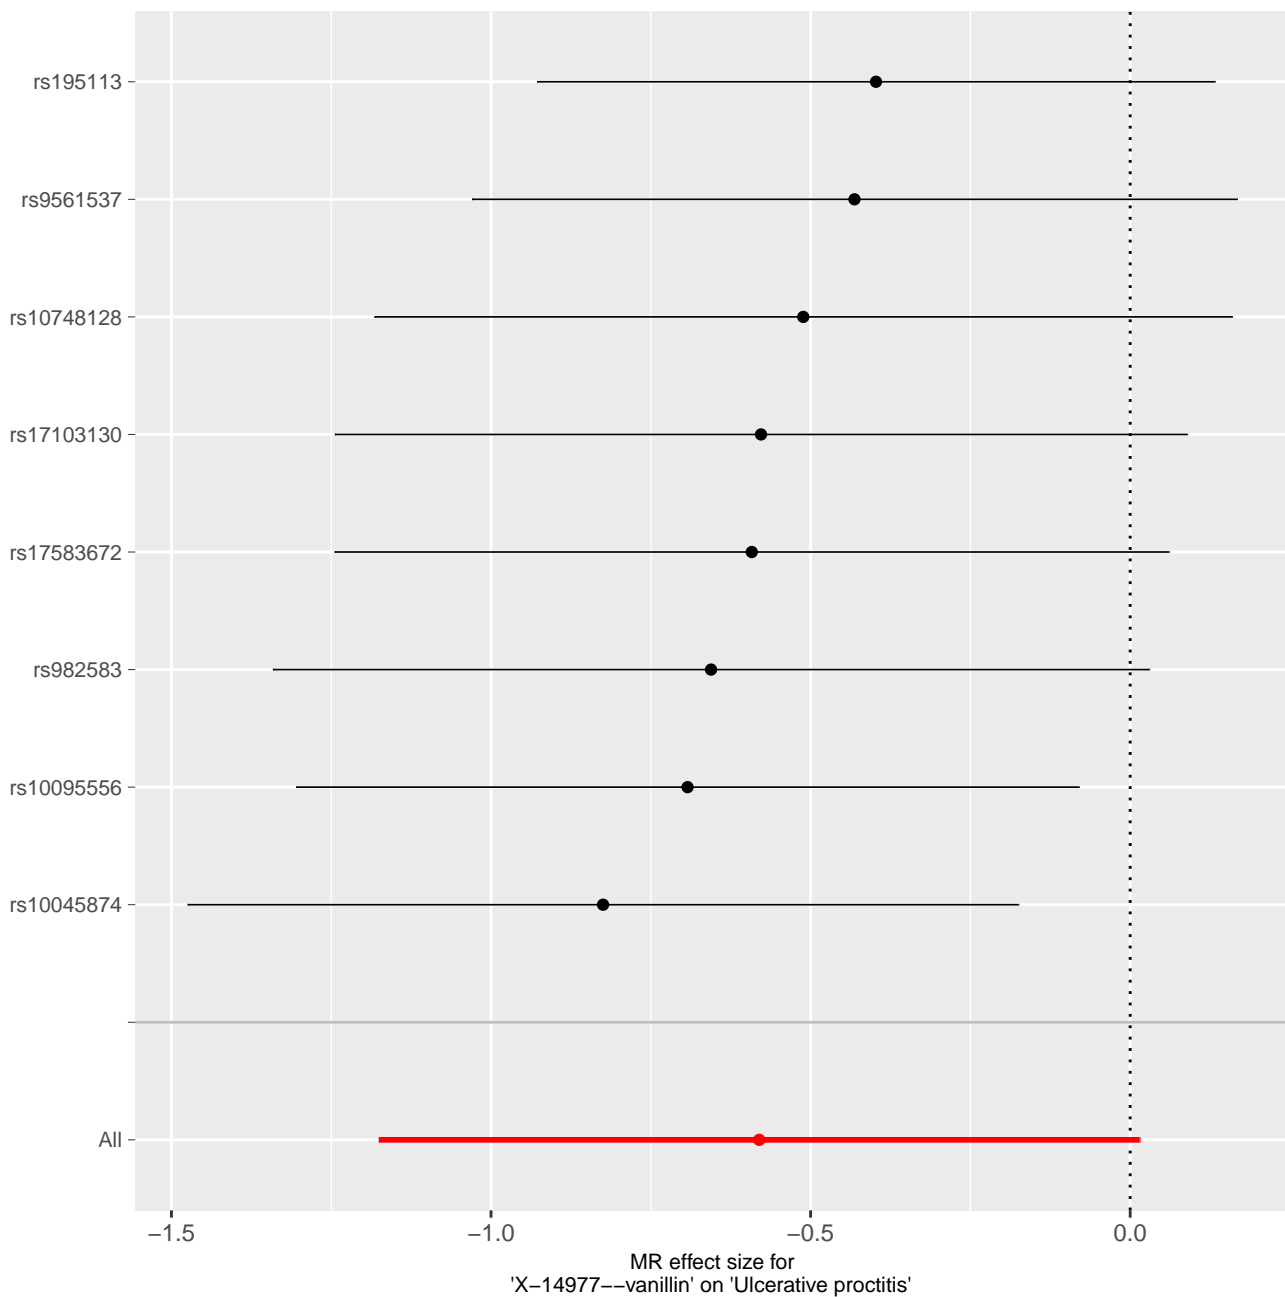

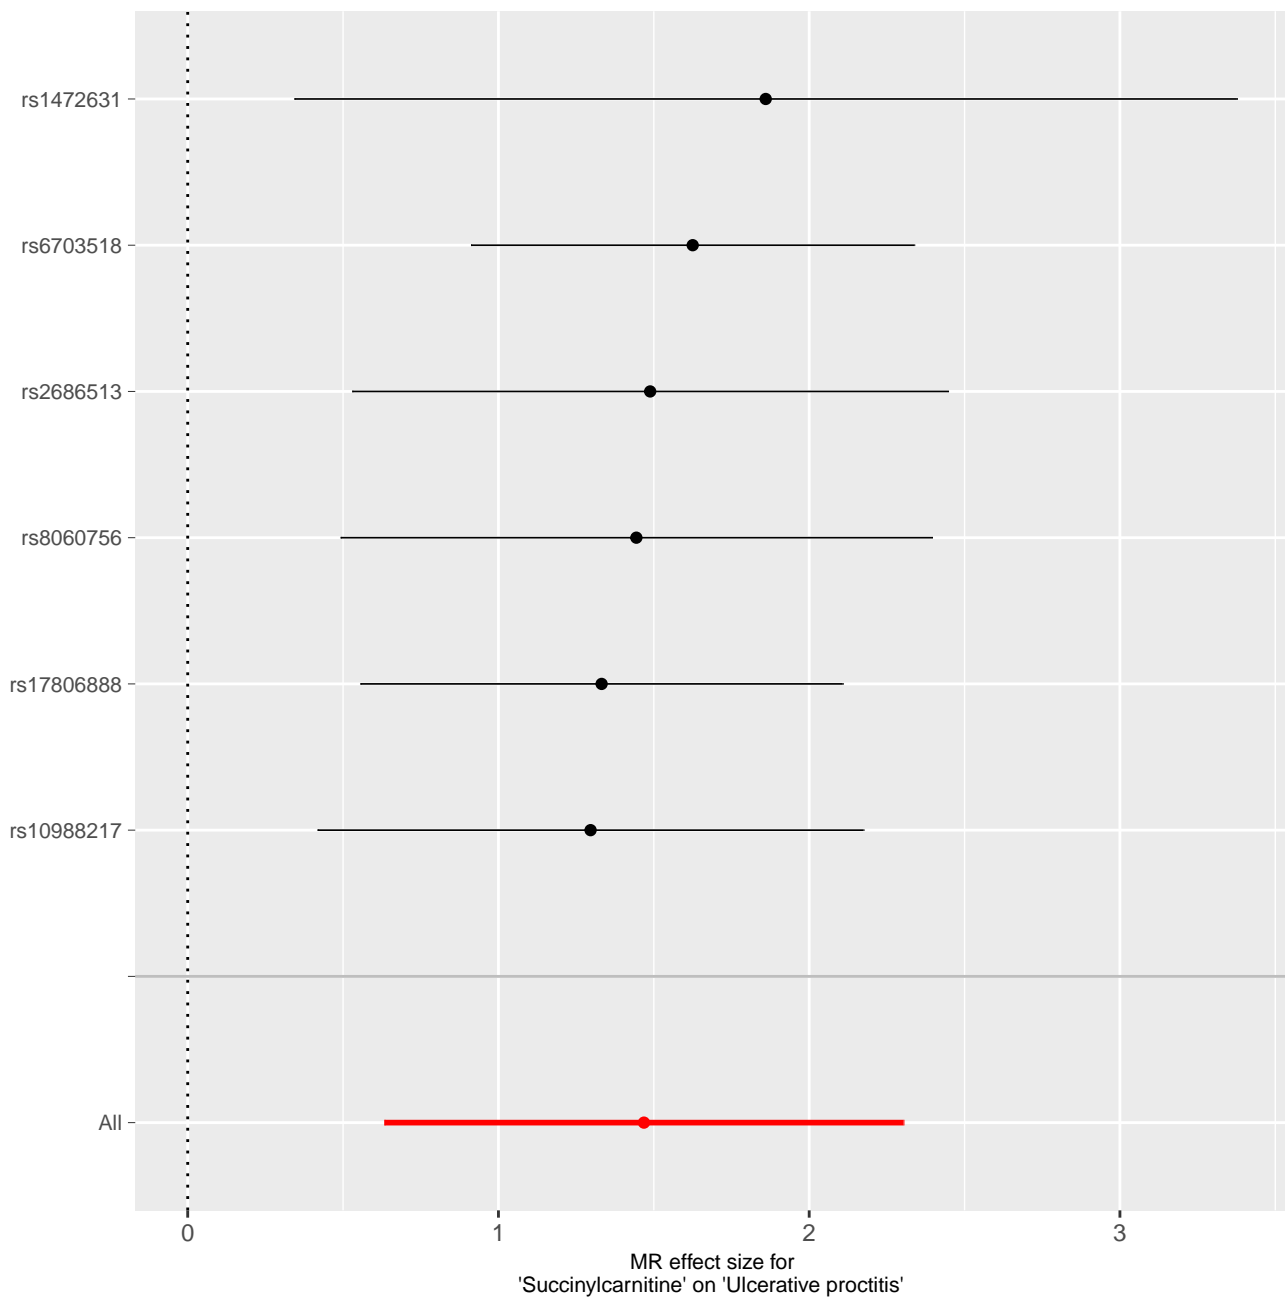

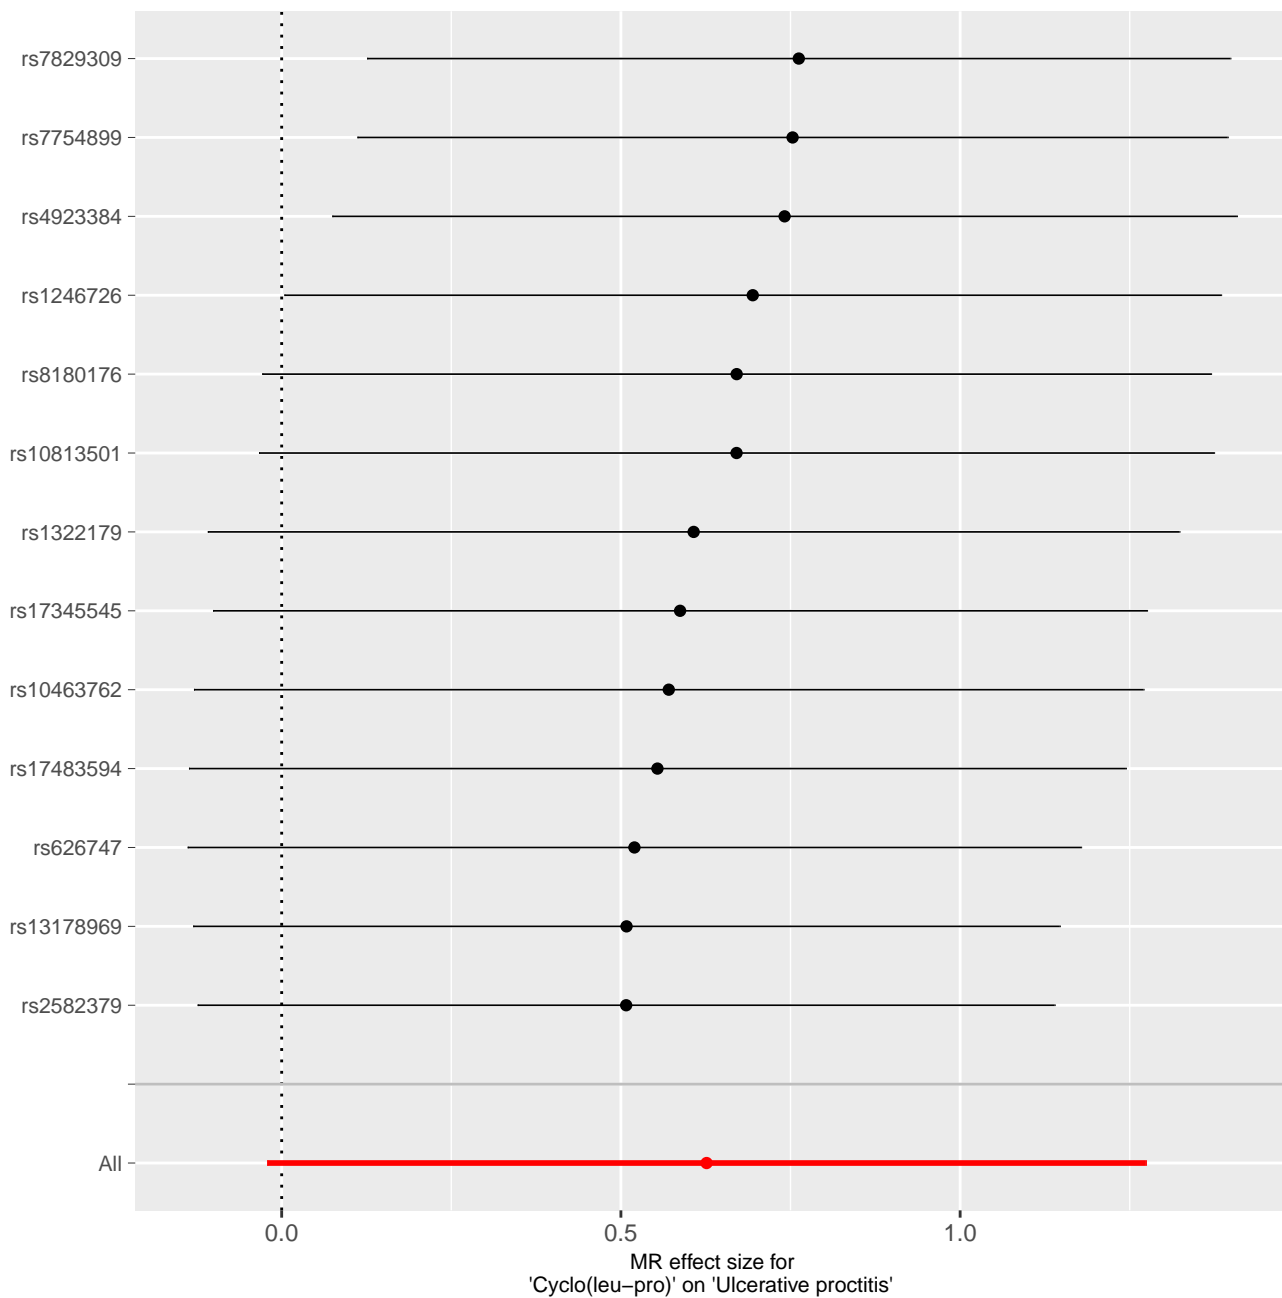

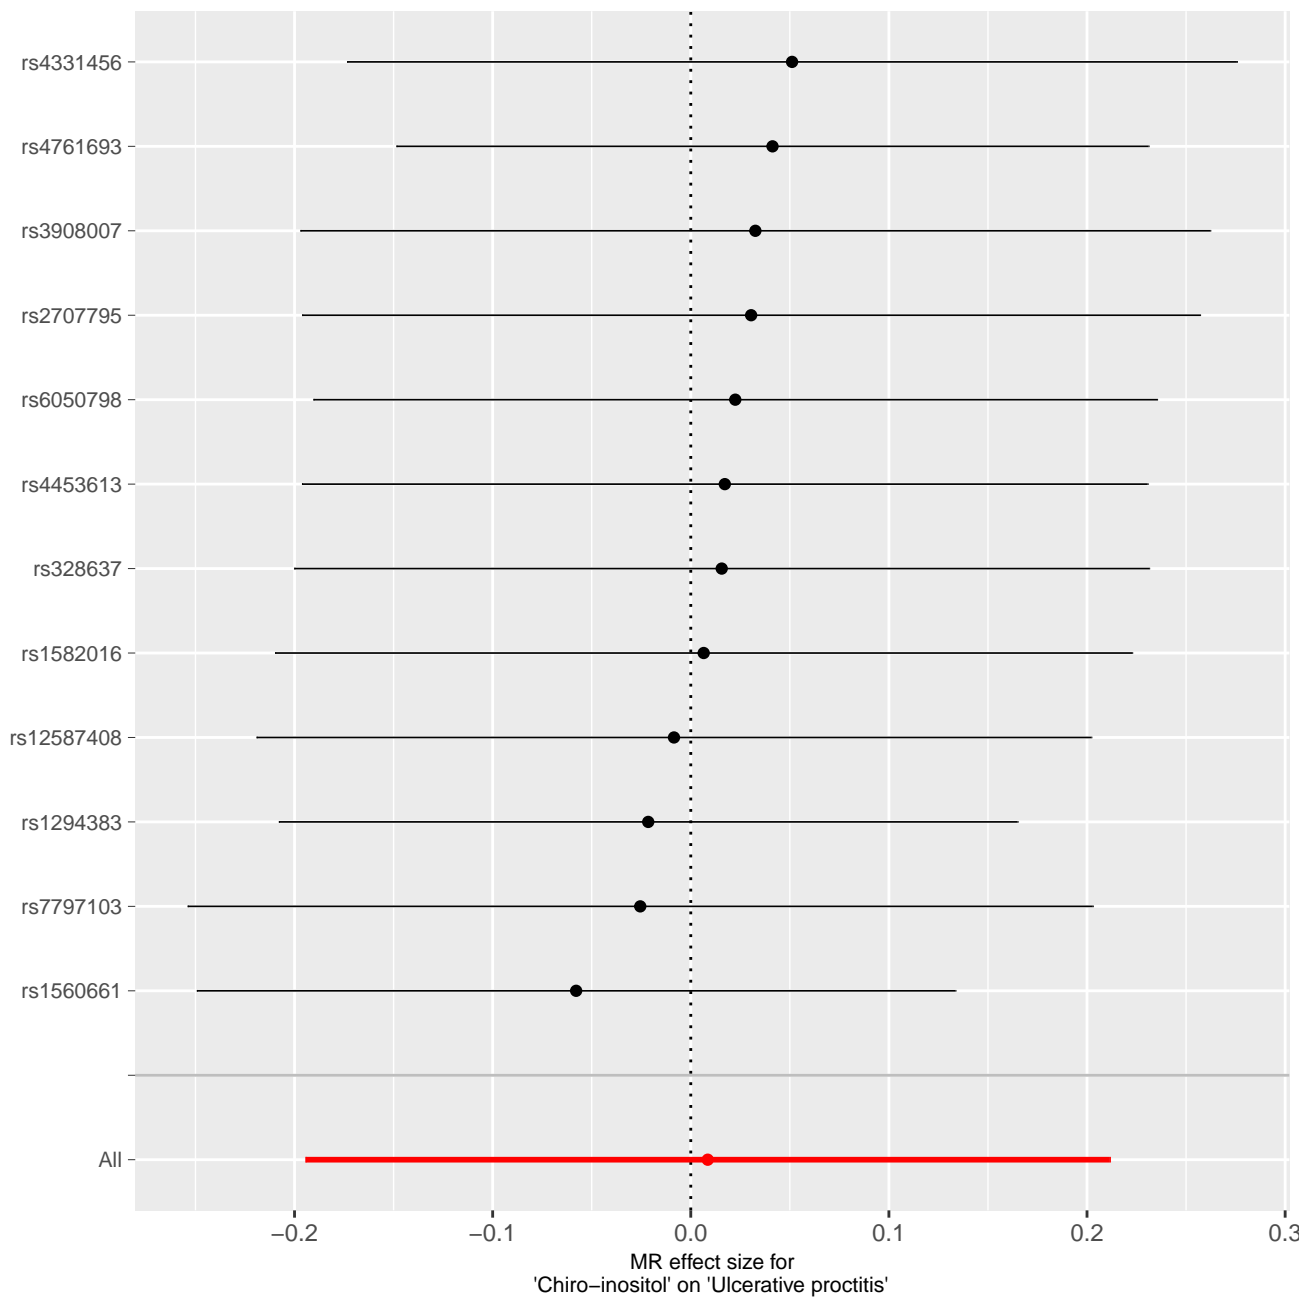

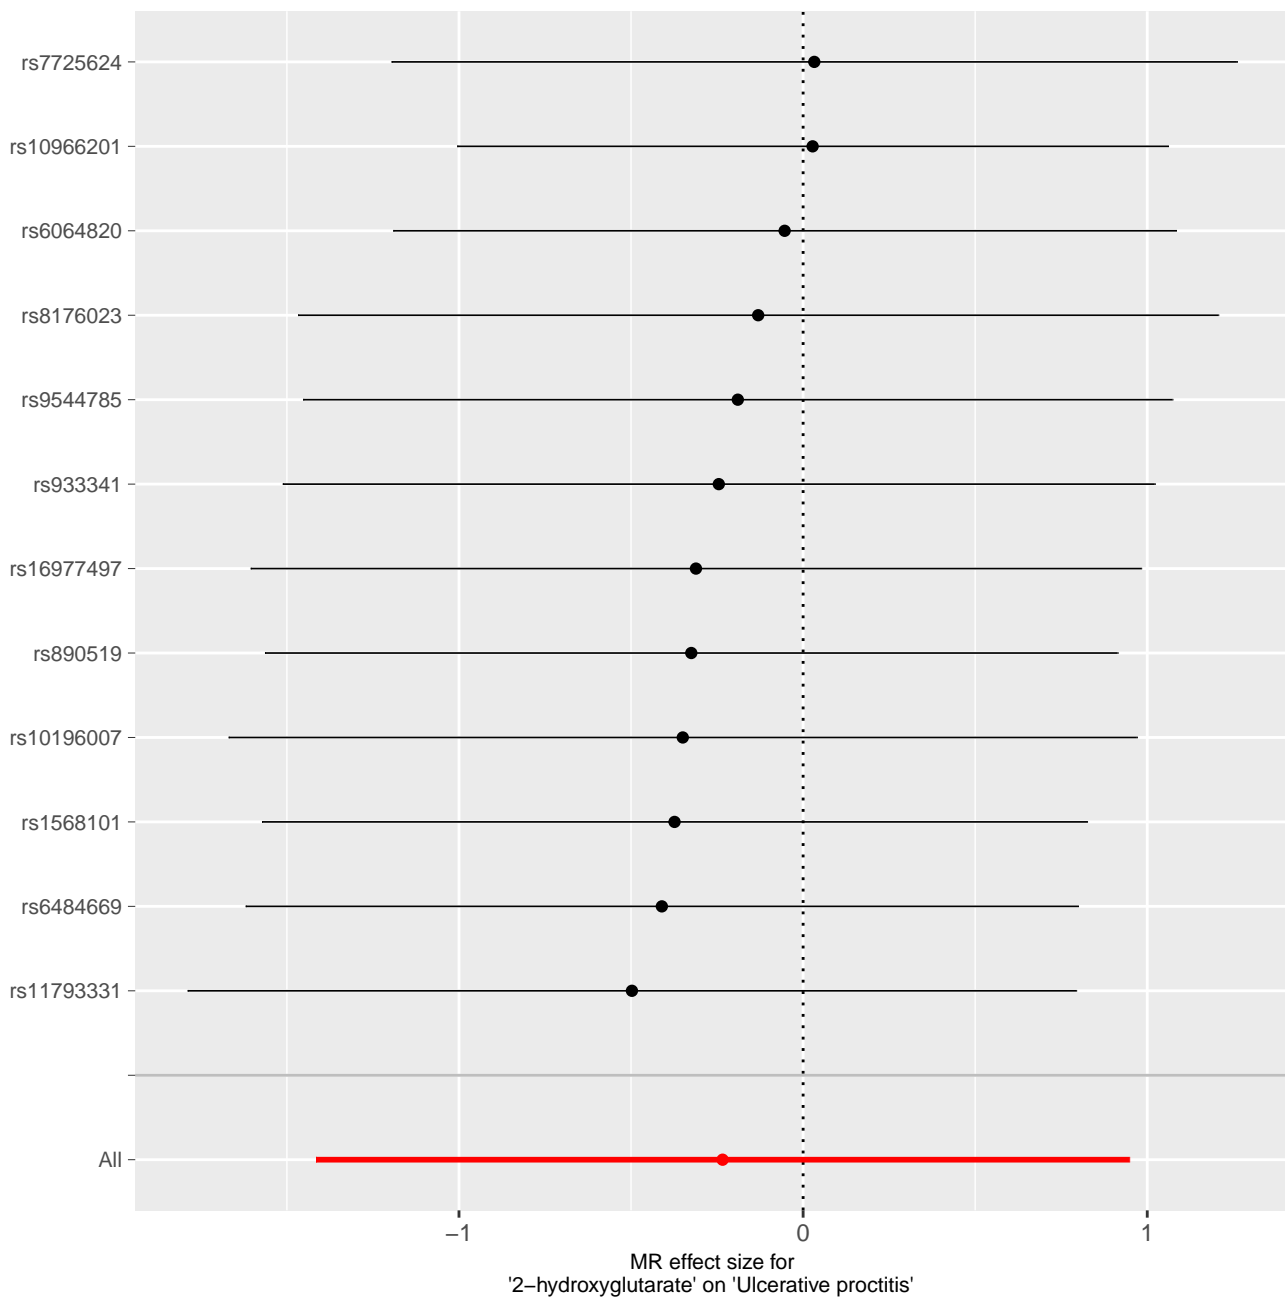

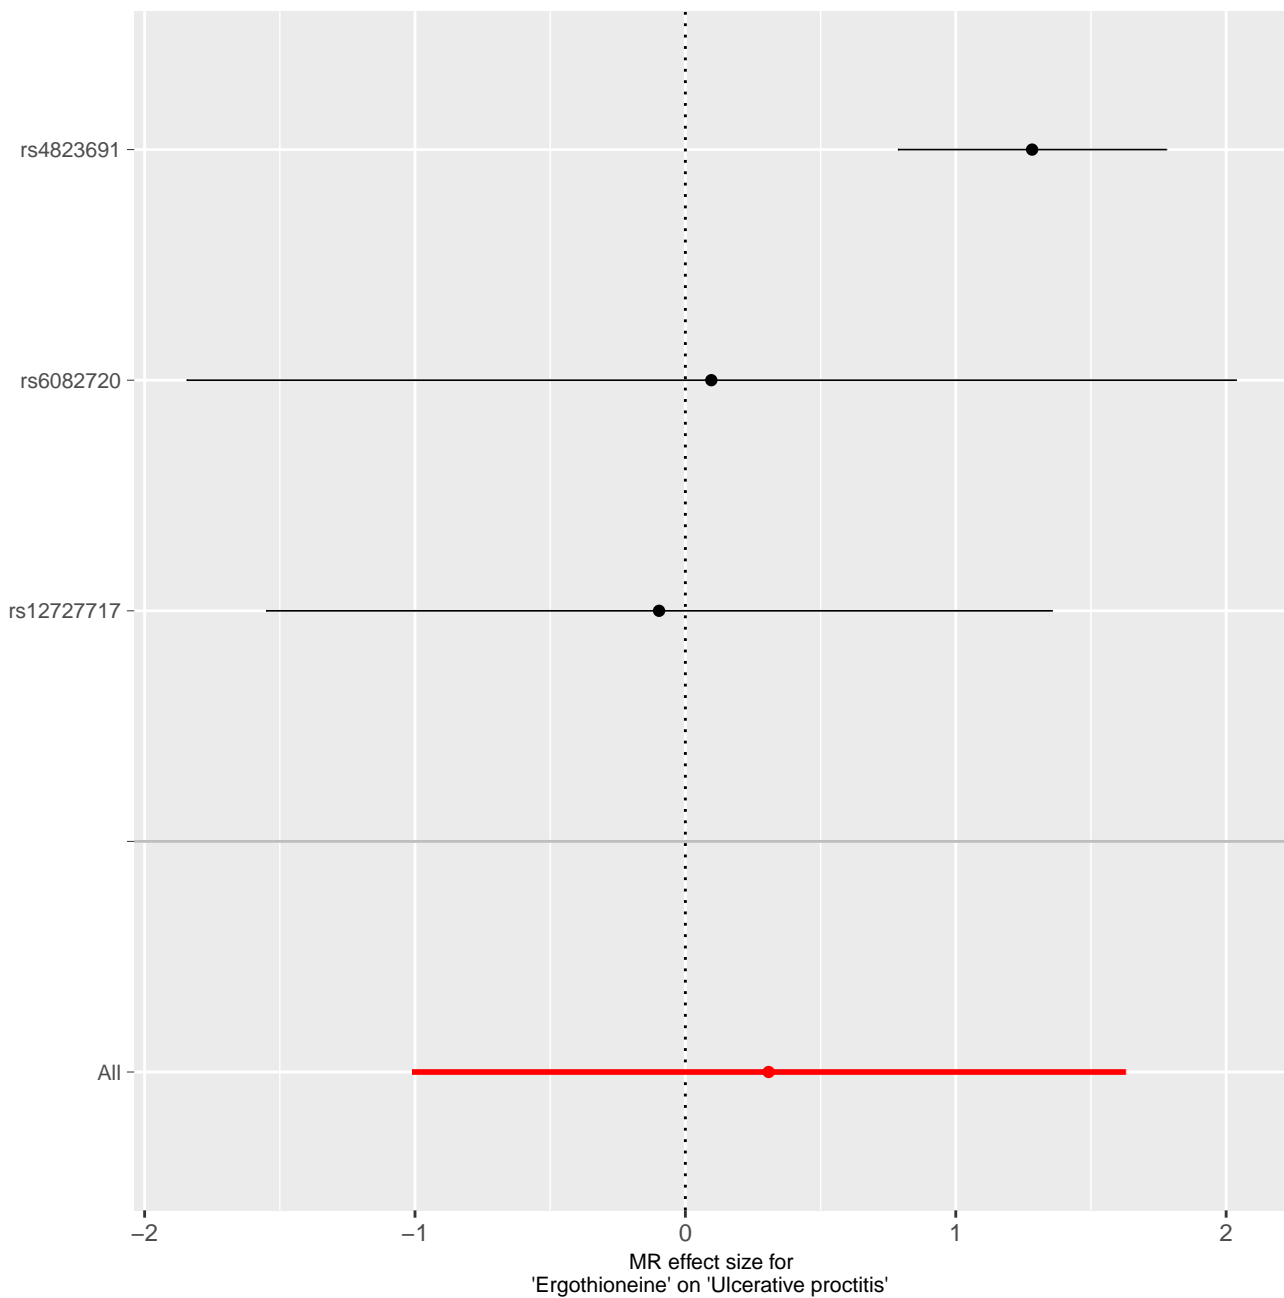

rs2672893

rs6089828

rs749902

rs4656083

All

MR effect size for  
'Phenylalanylphenylalanine' on 'Ulcerative proctitis'

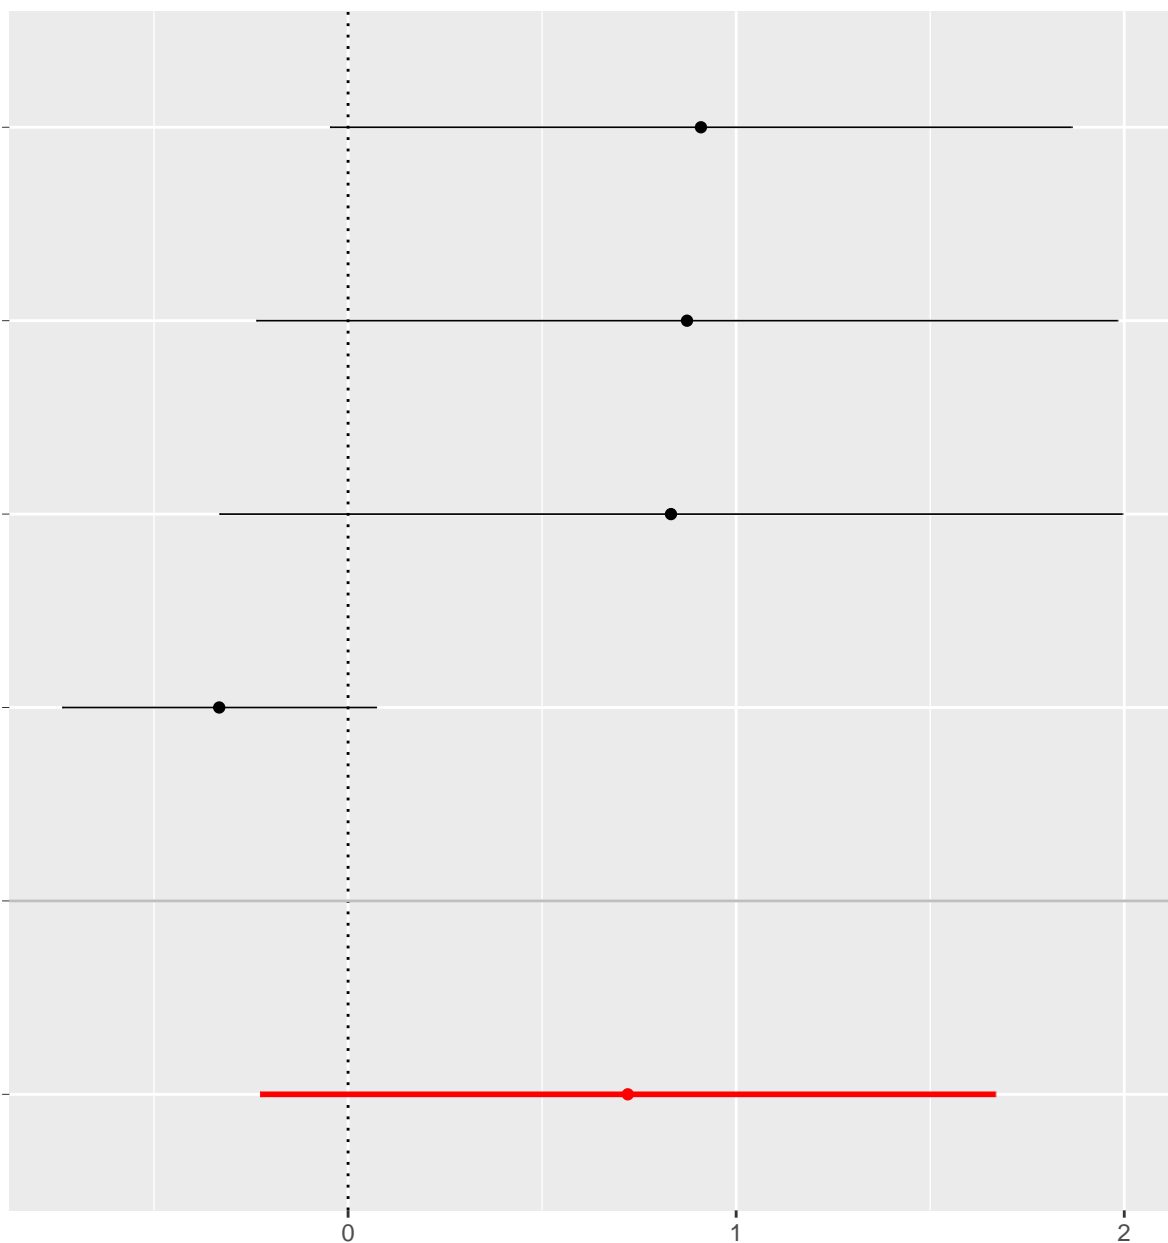

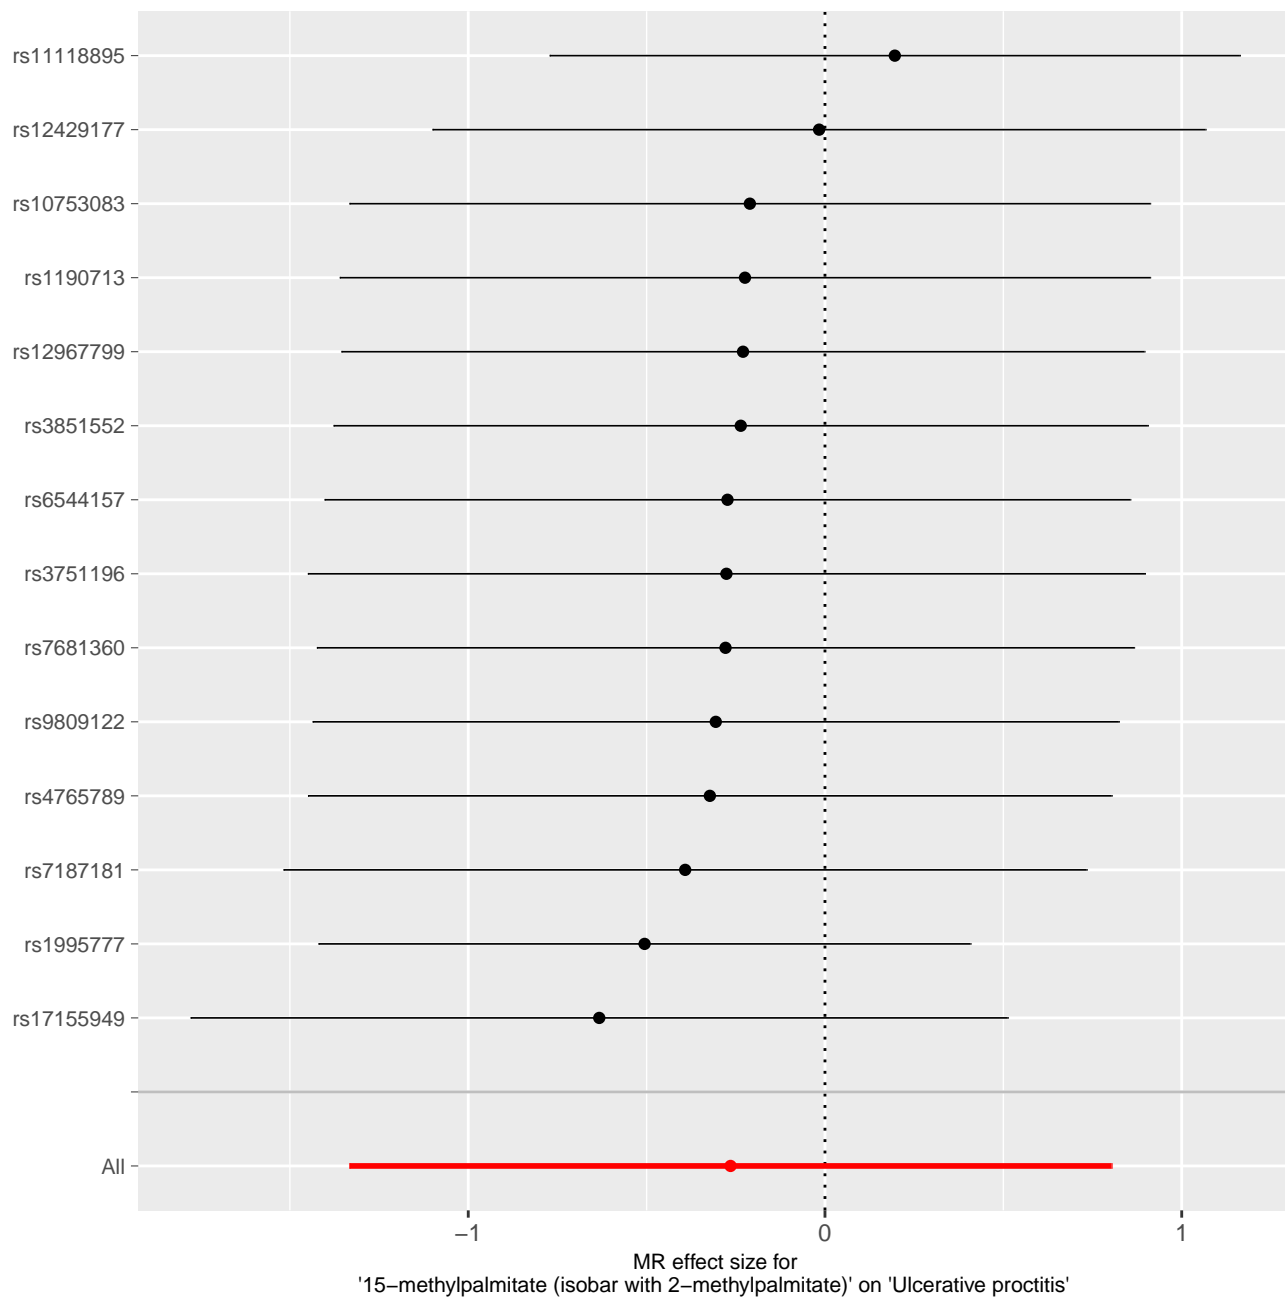



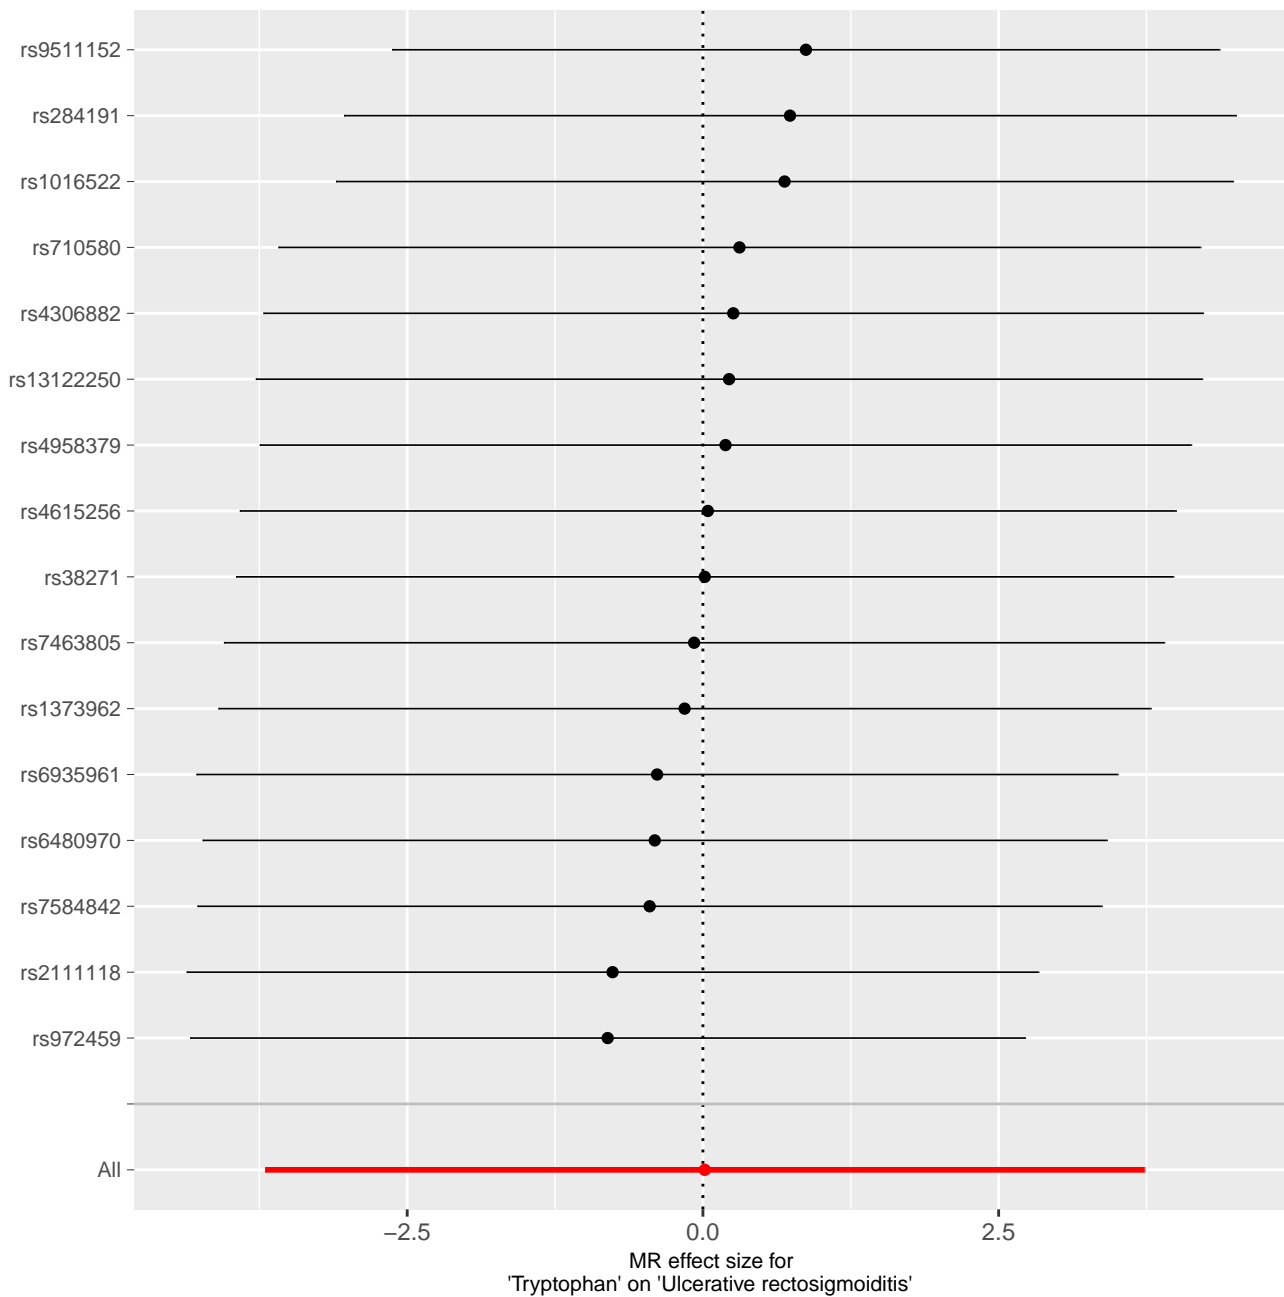

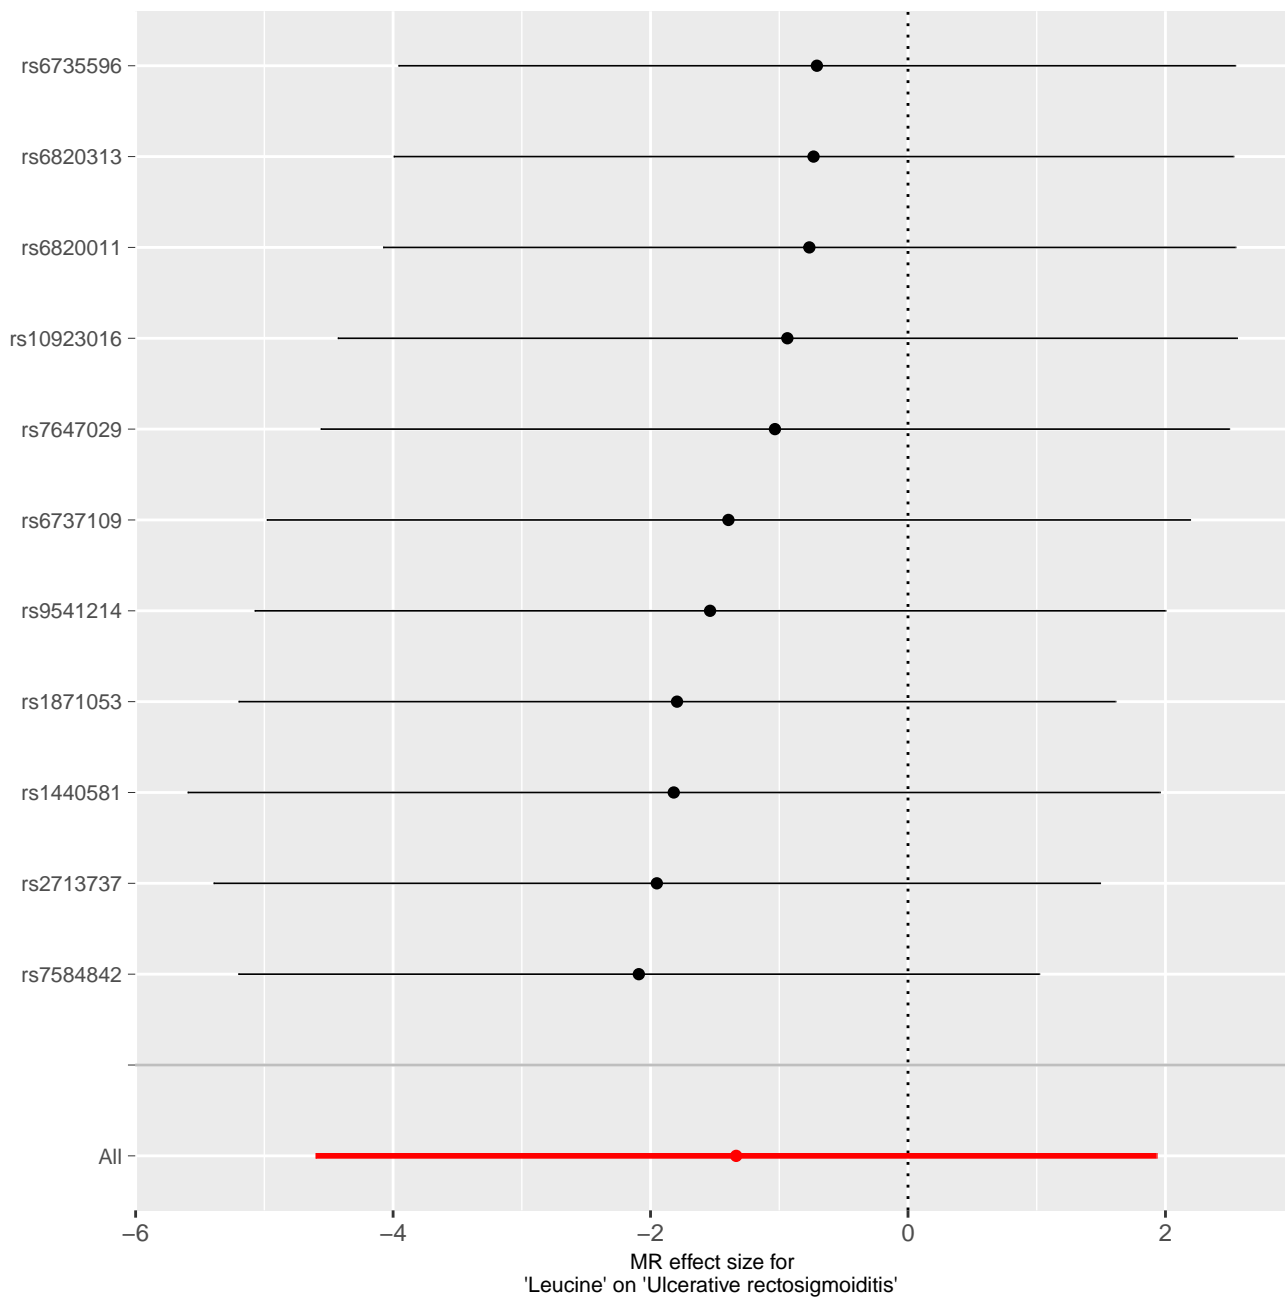

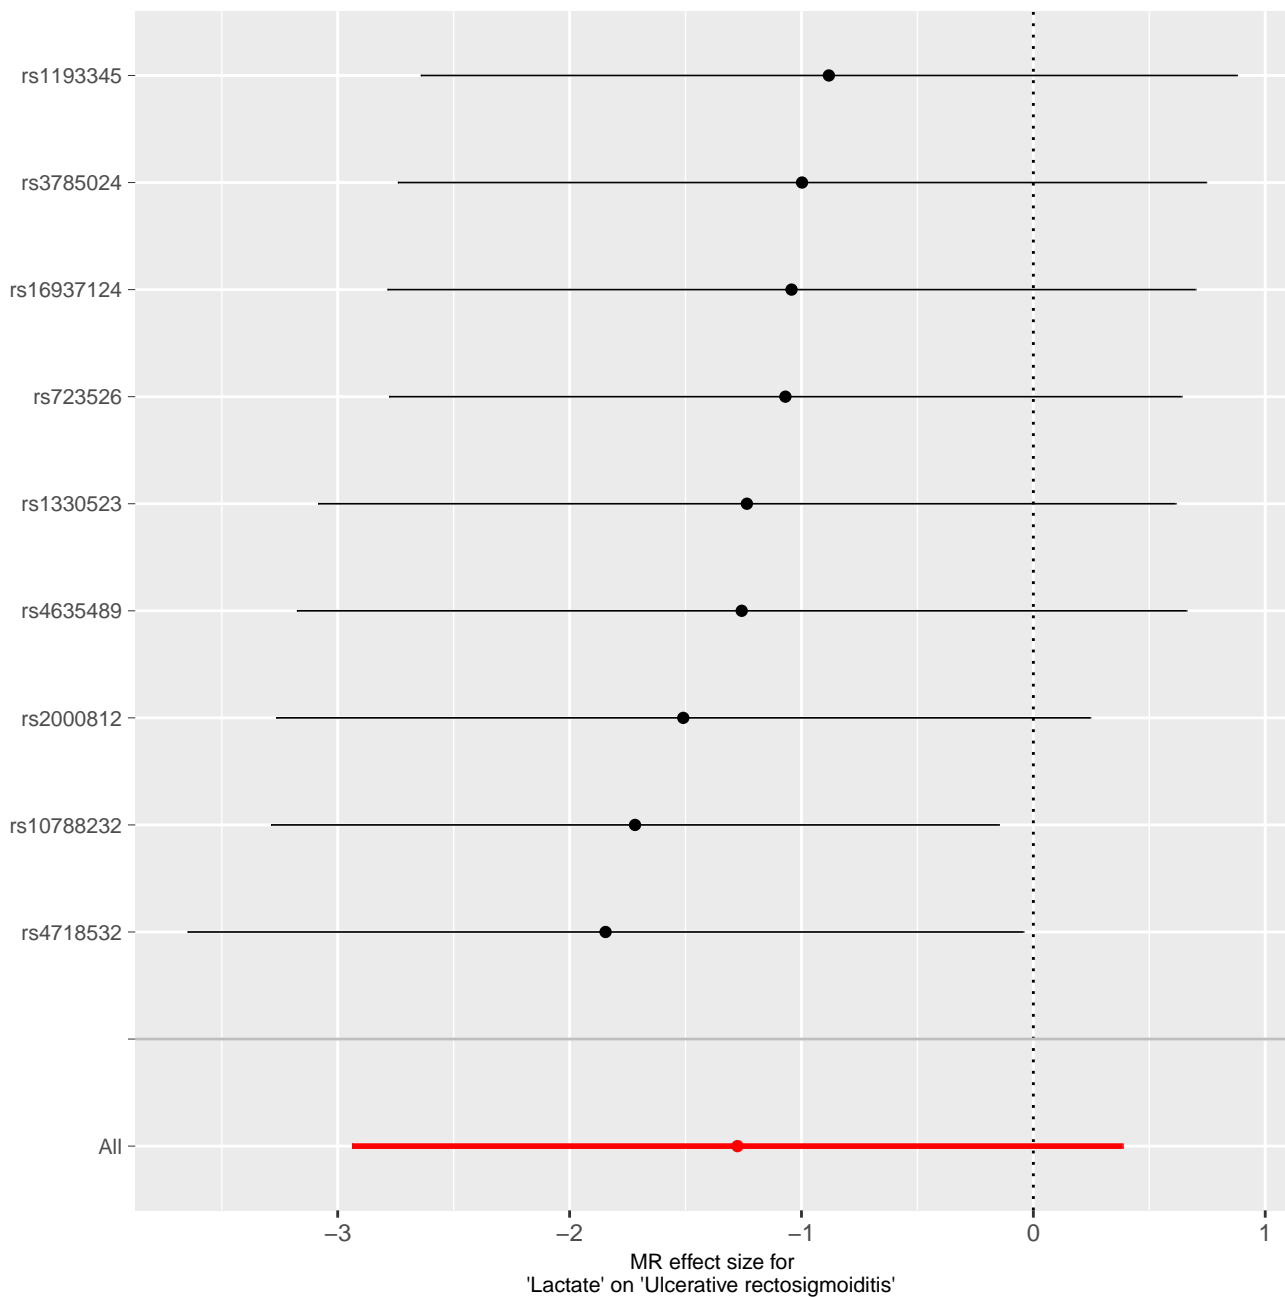

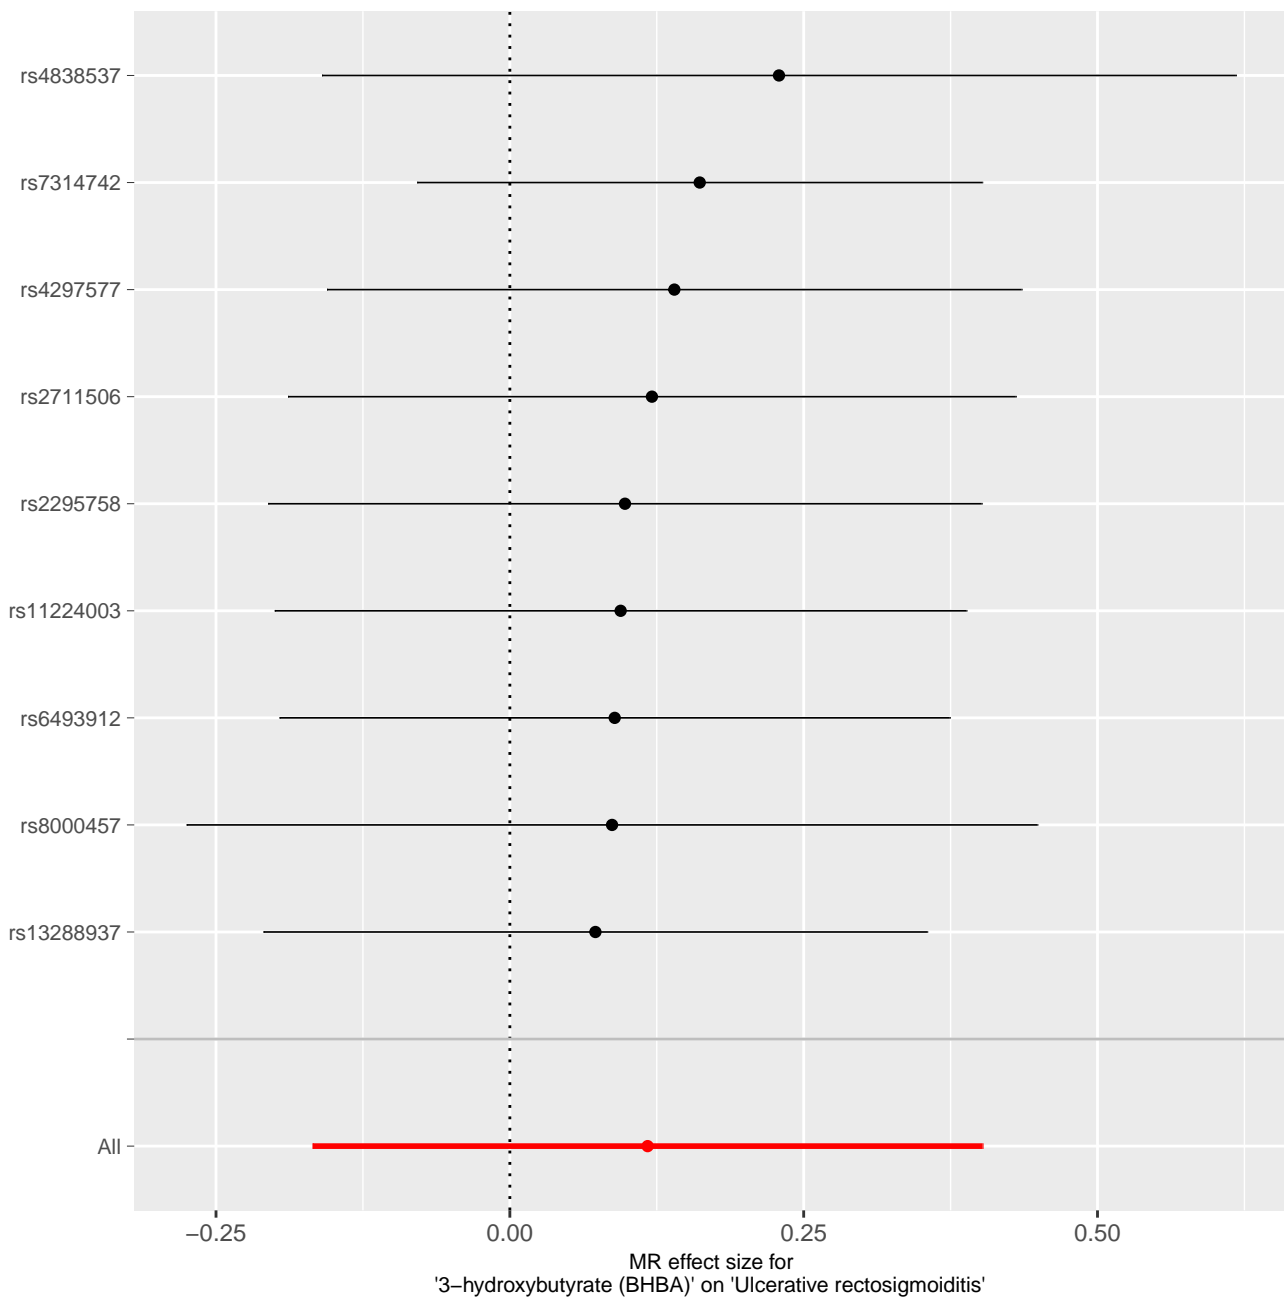

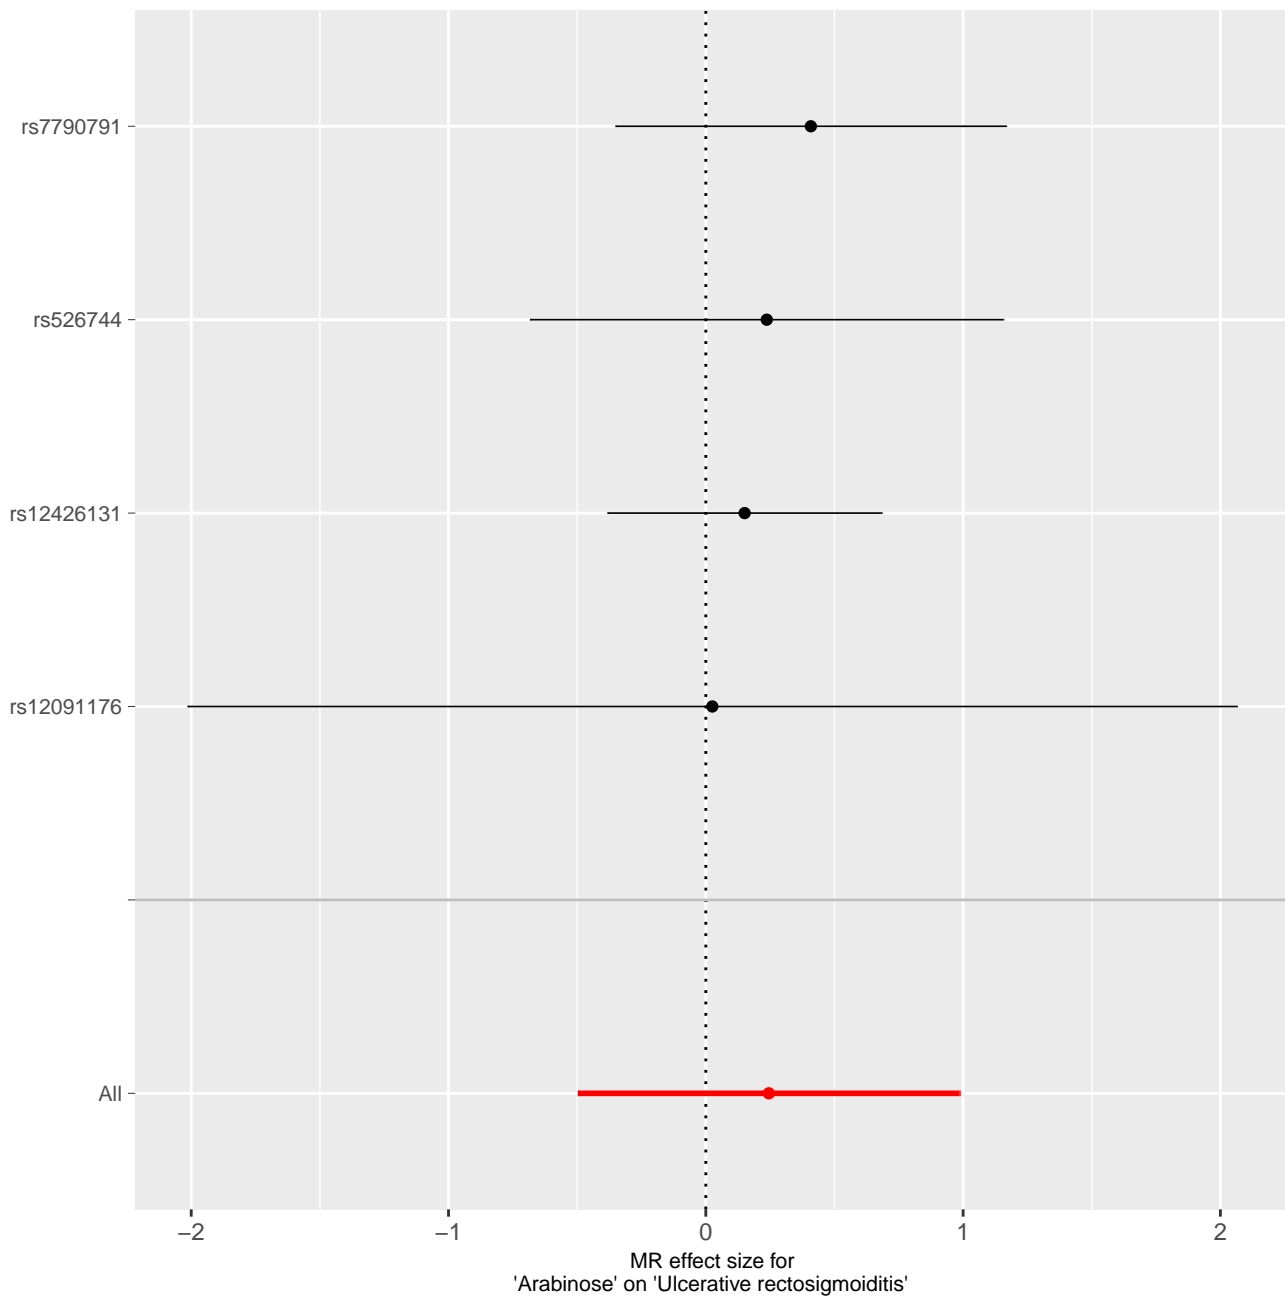

rs661454

rs2456584

rs4663119

All

0

1

2

3

4

MR effect size for  
'Fructose' on 'Ulcerative rectosigmoiditis'

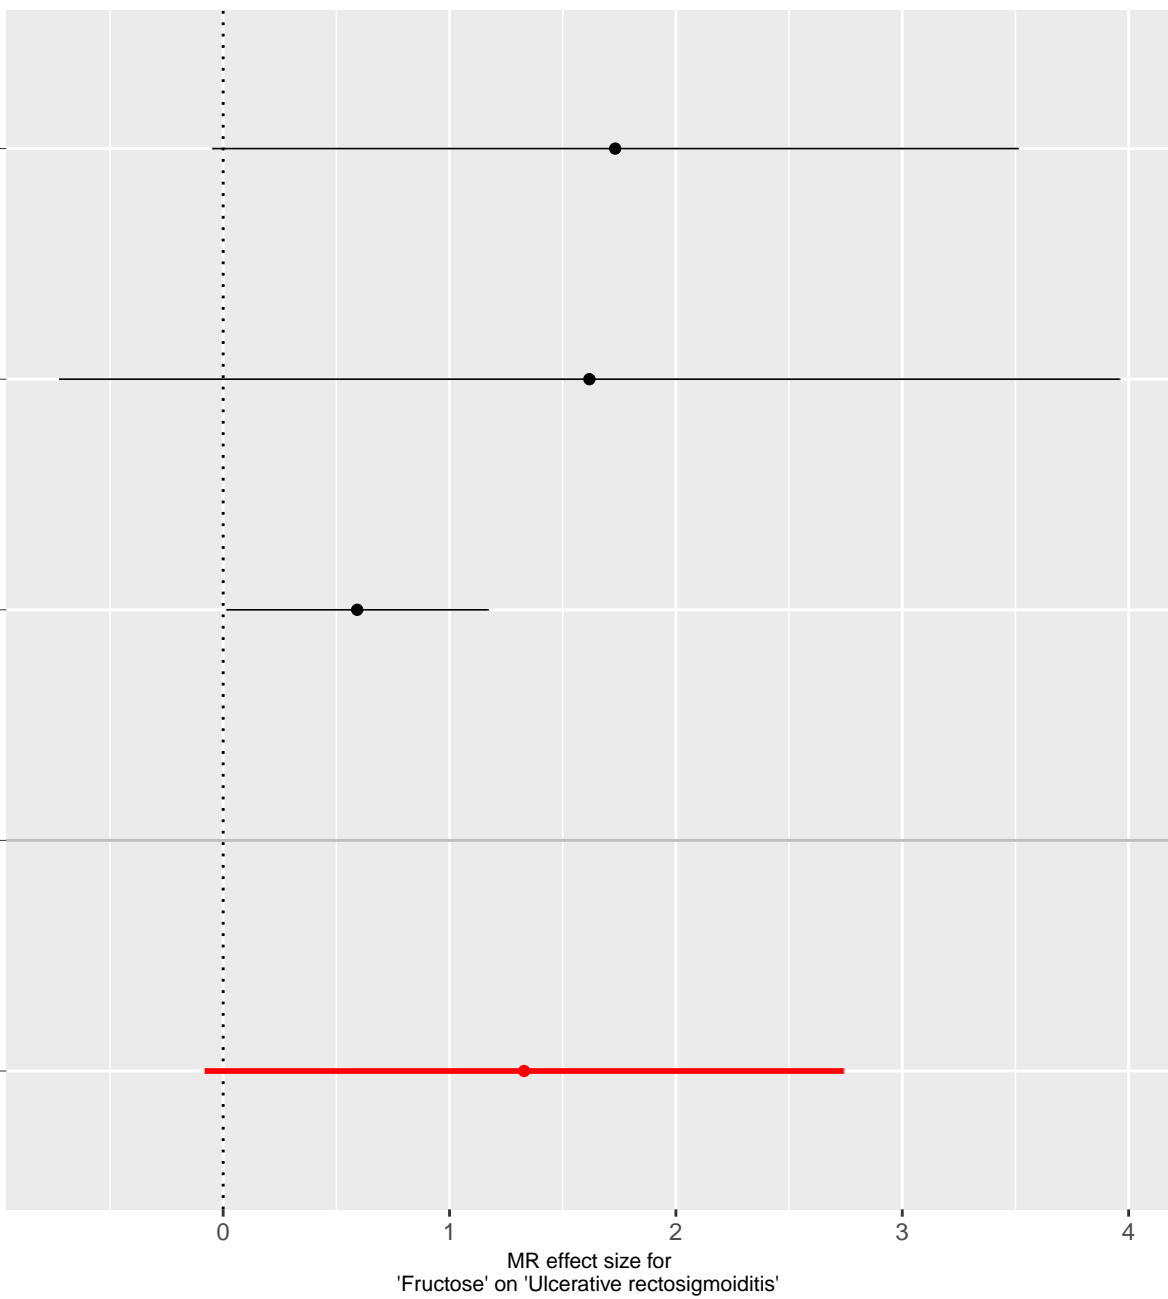

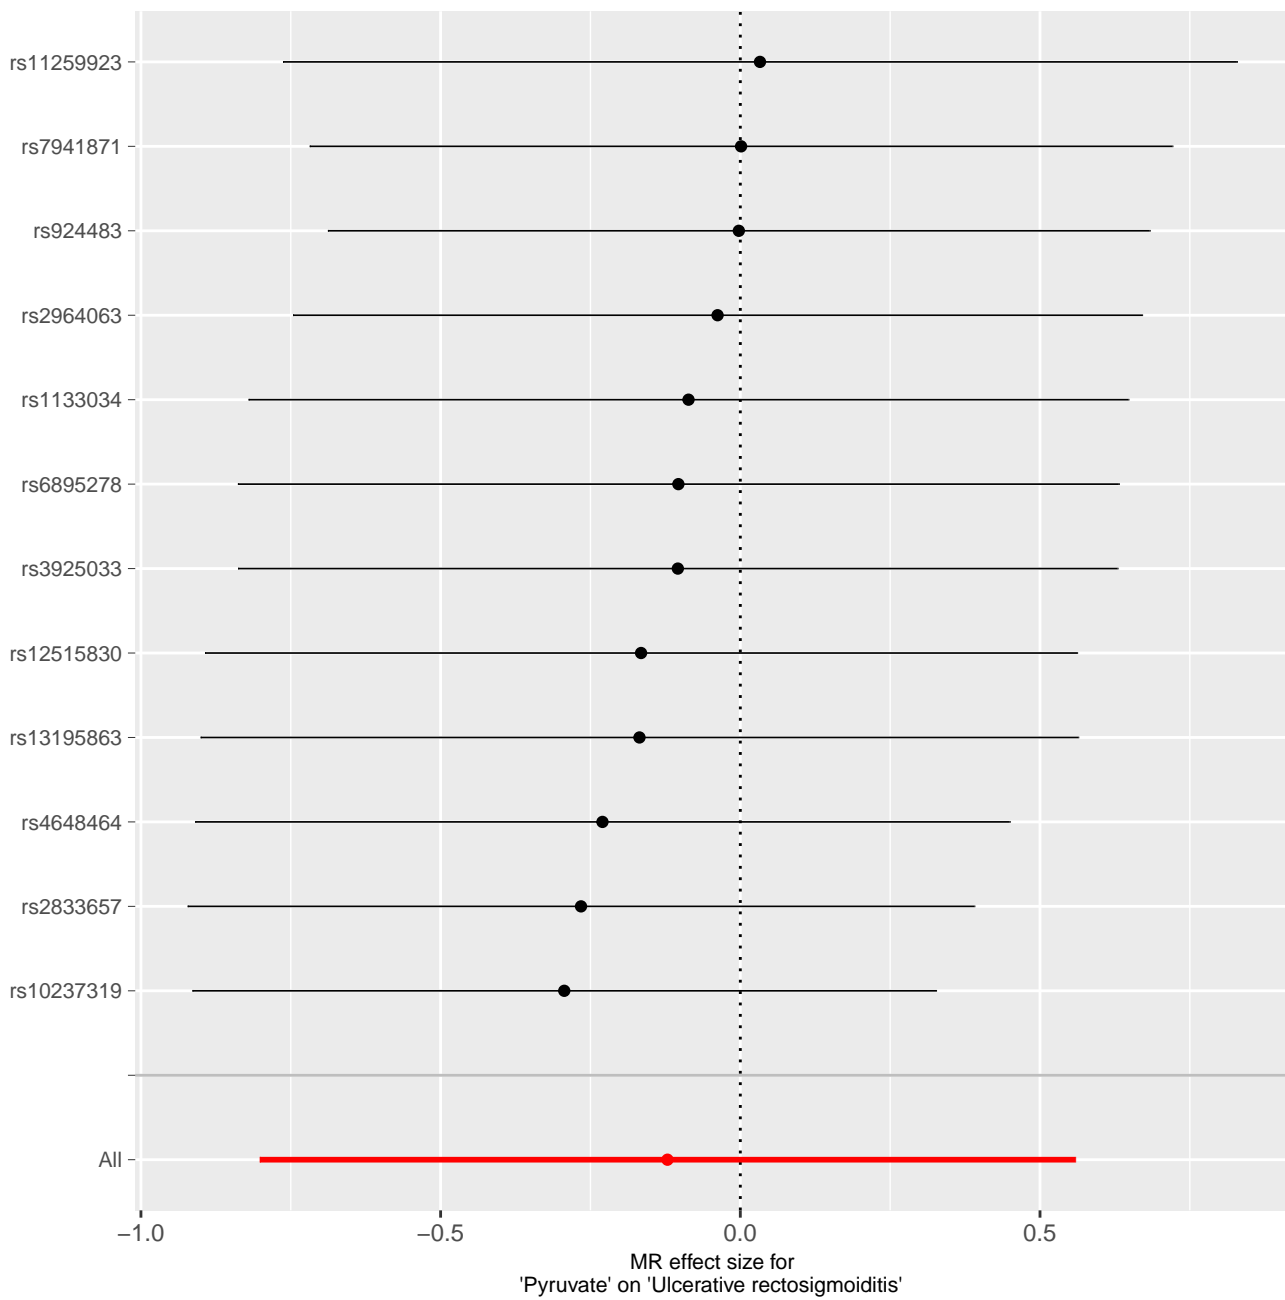

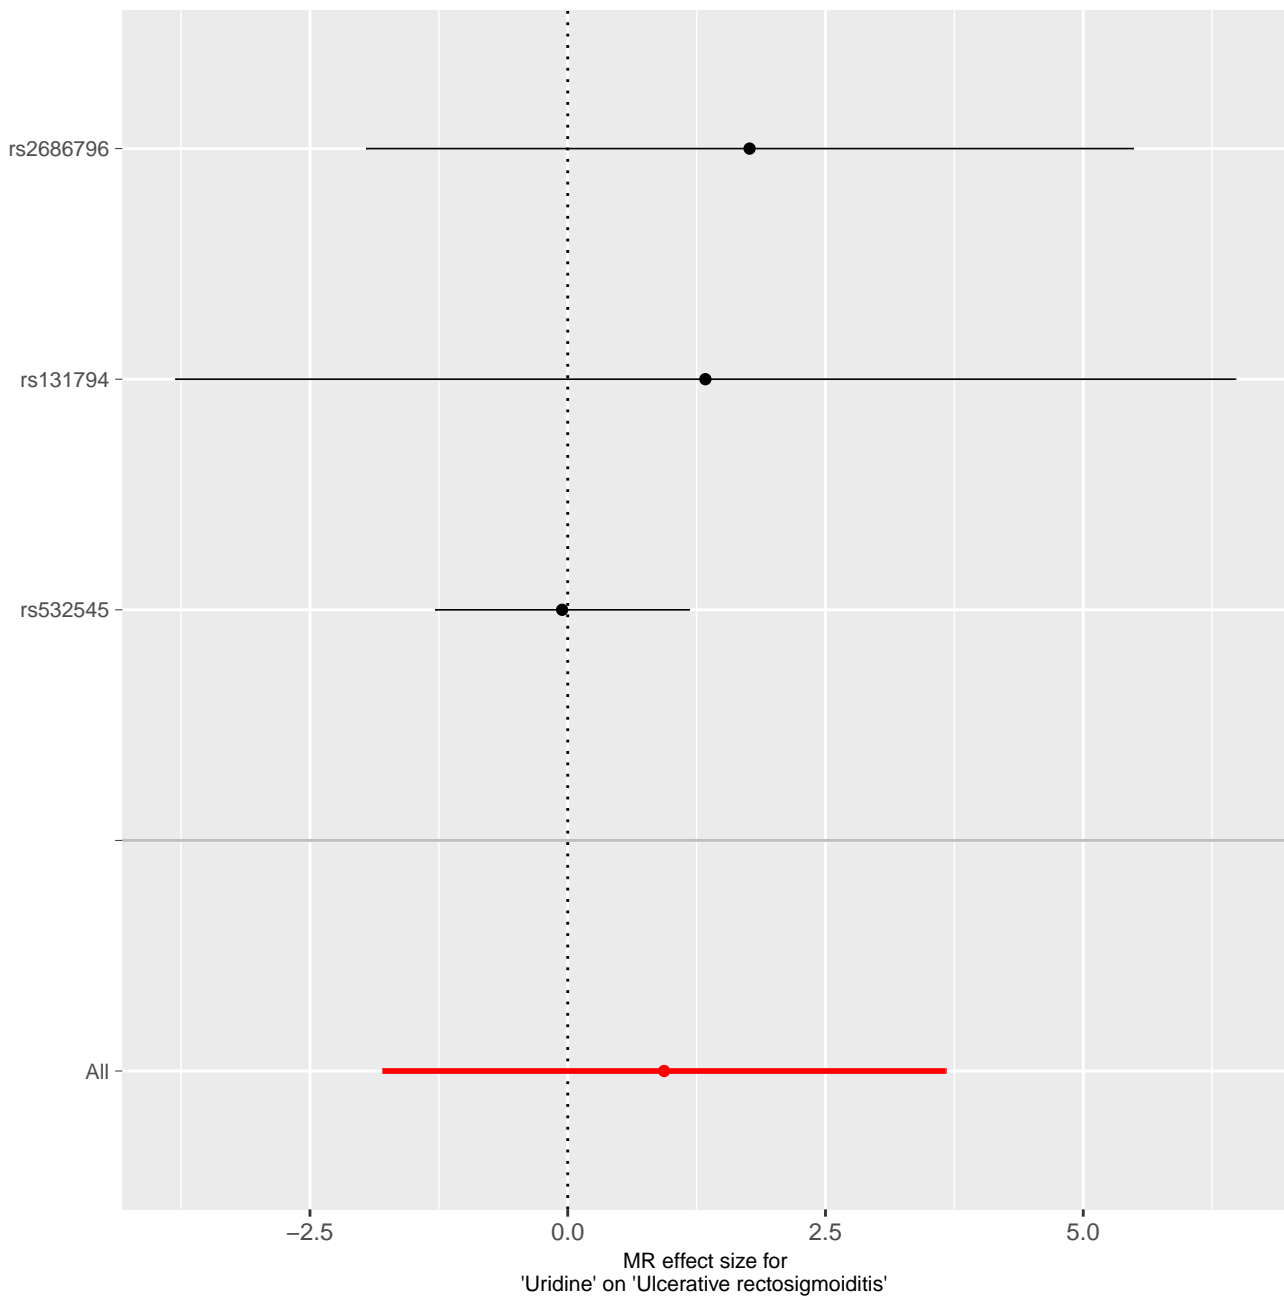



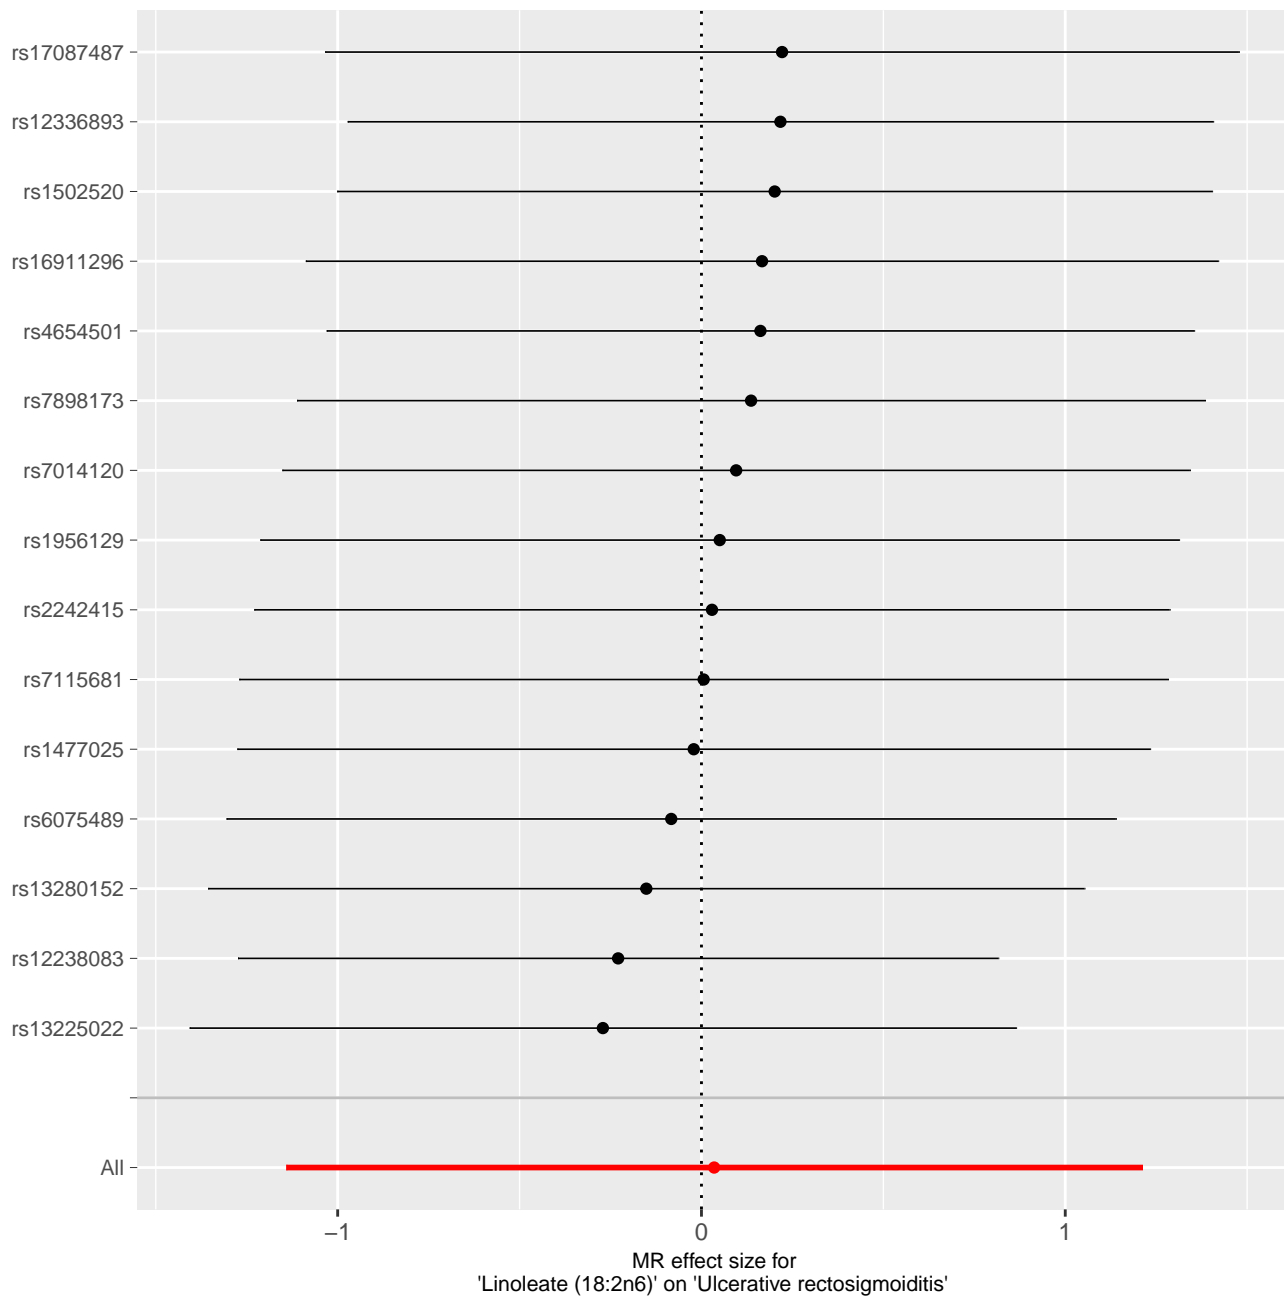

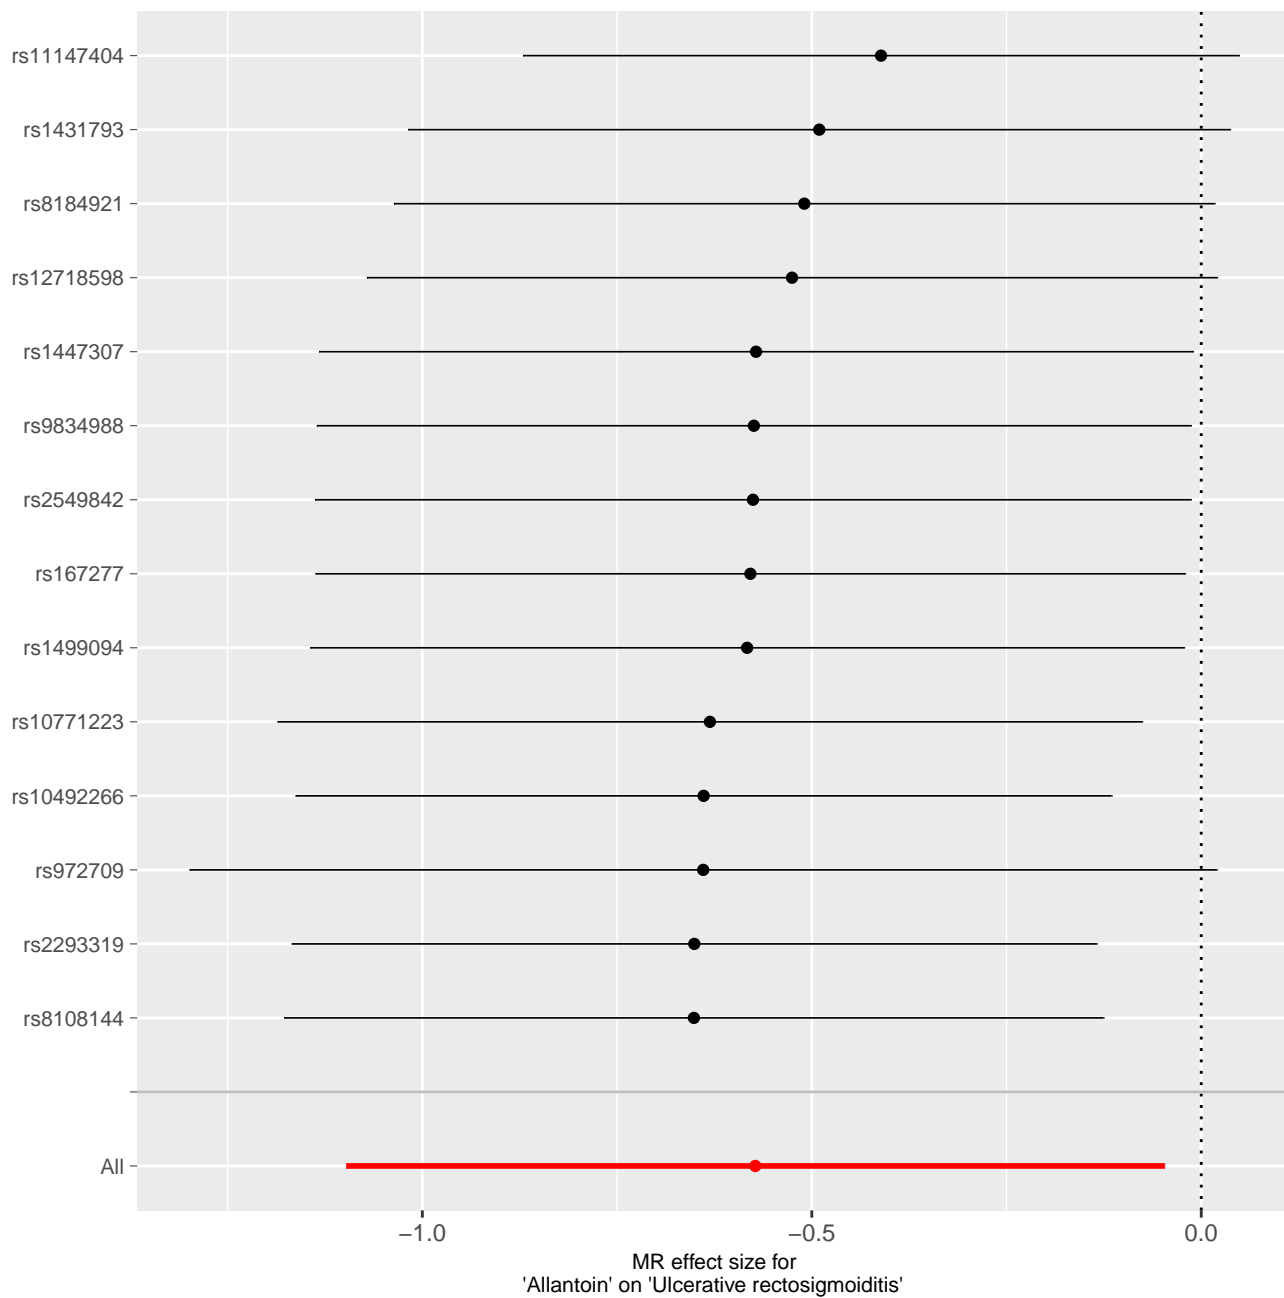

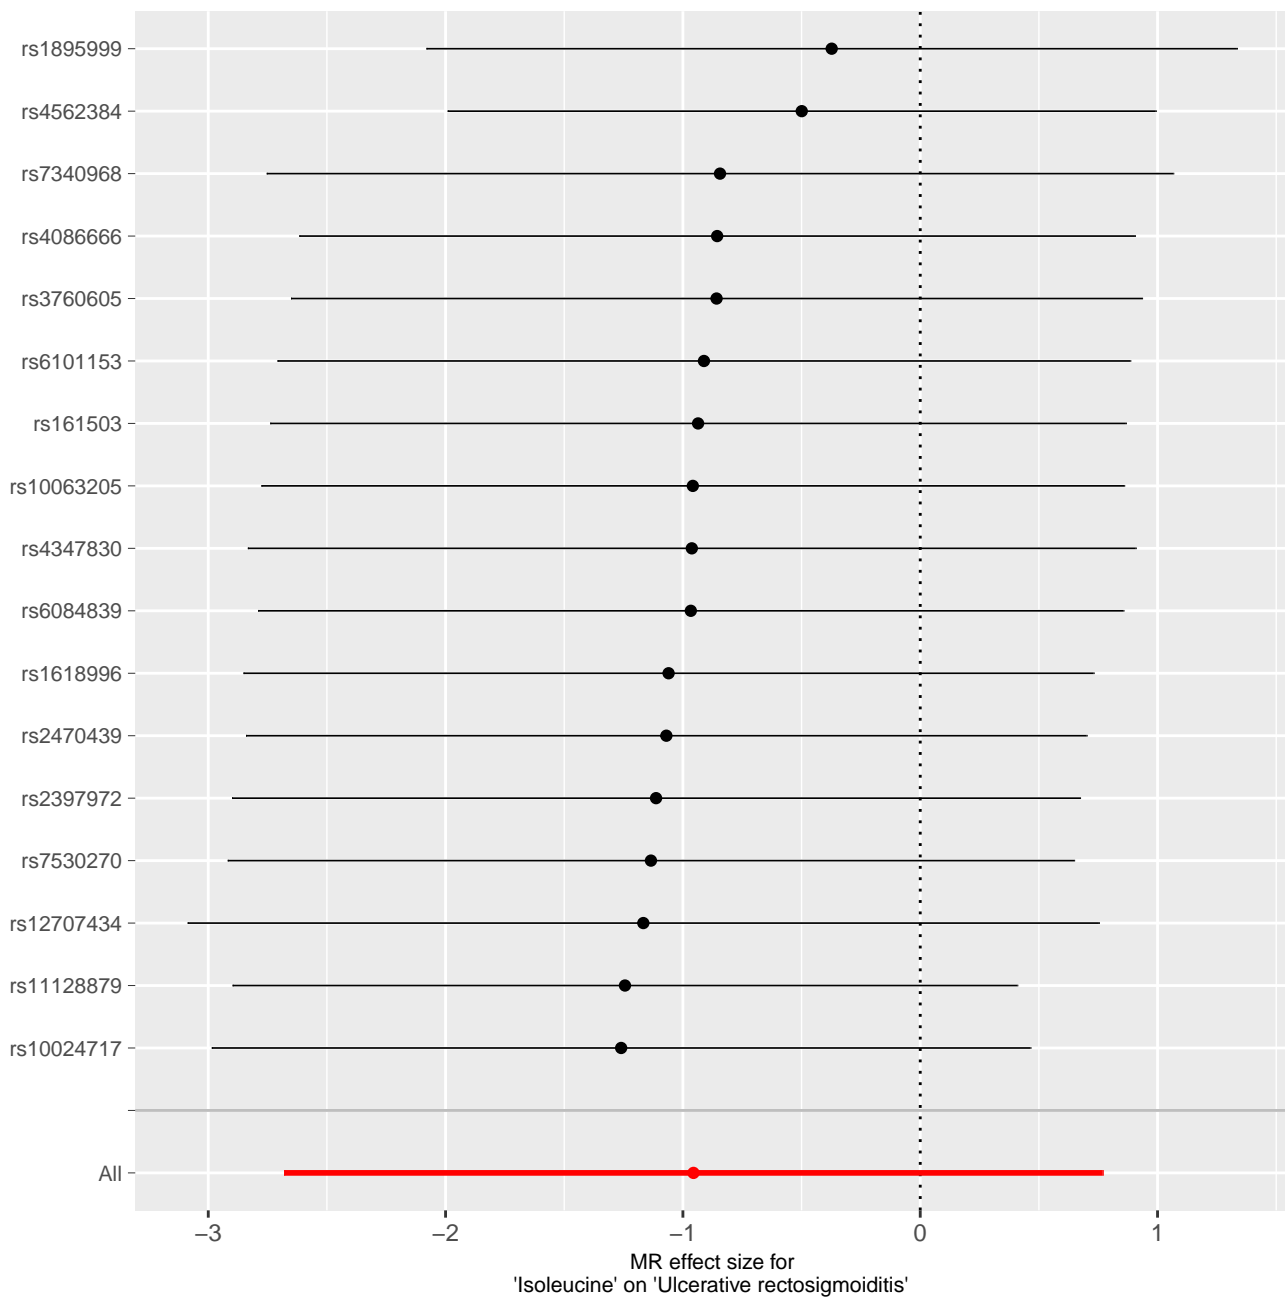

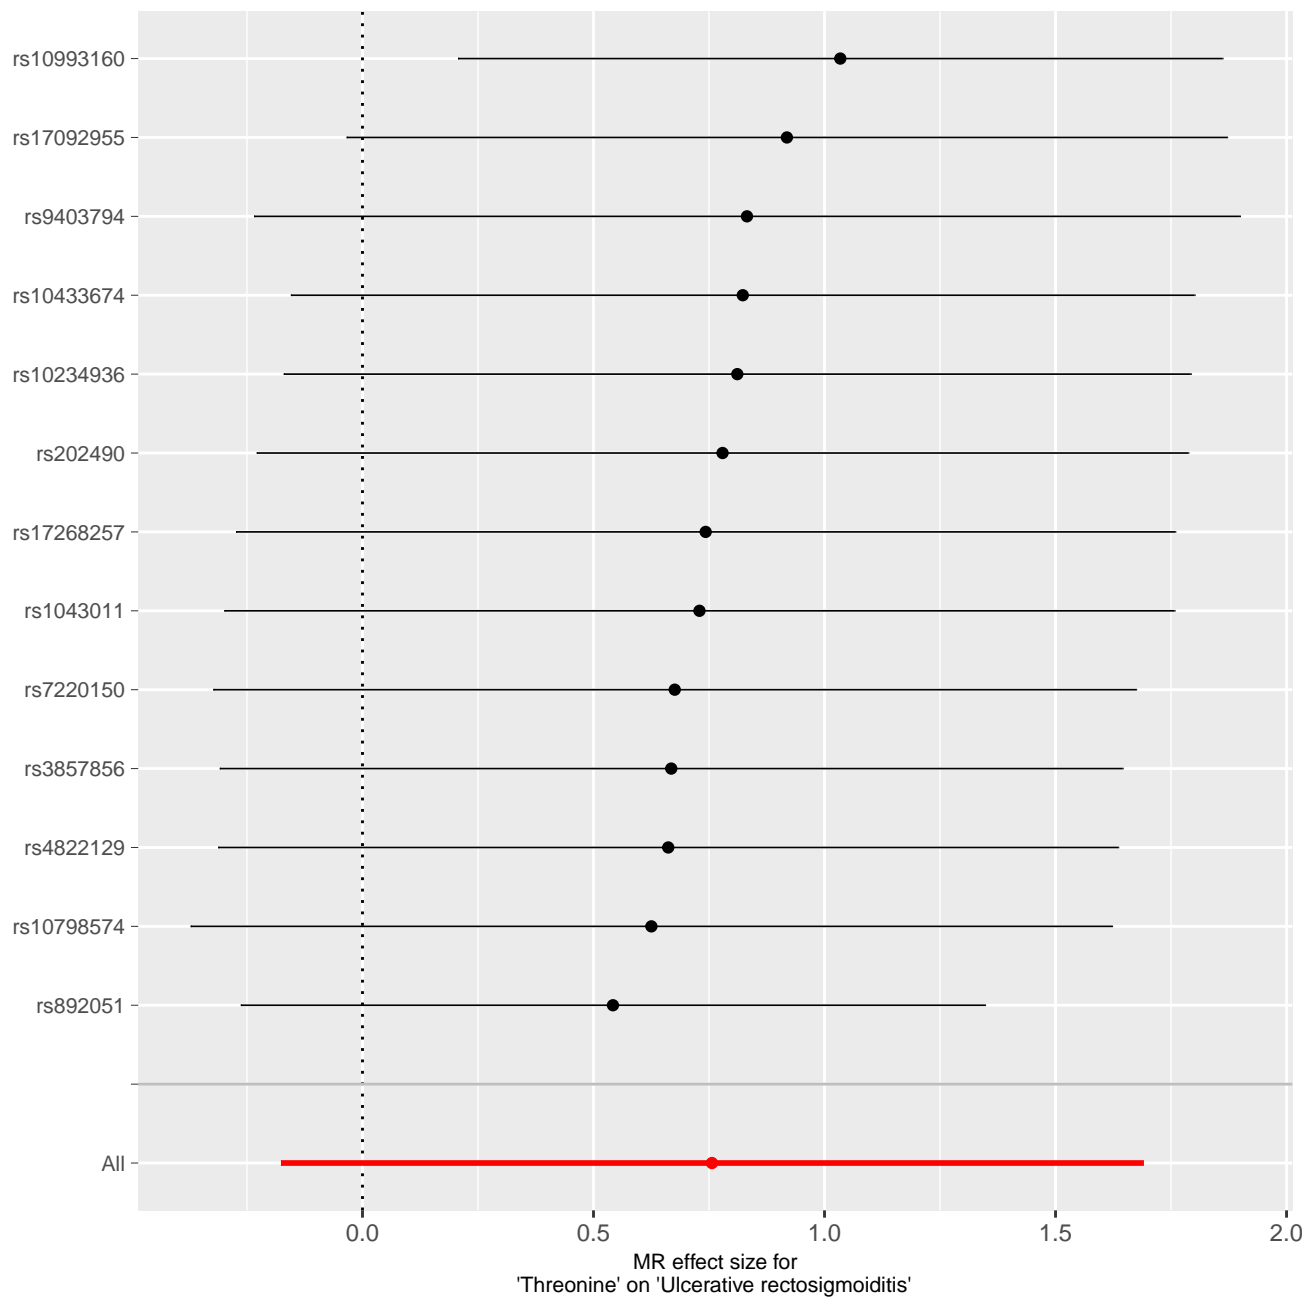

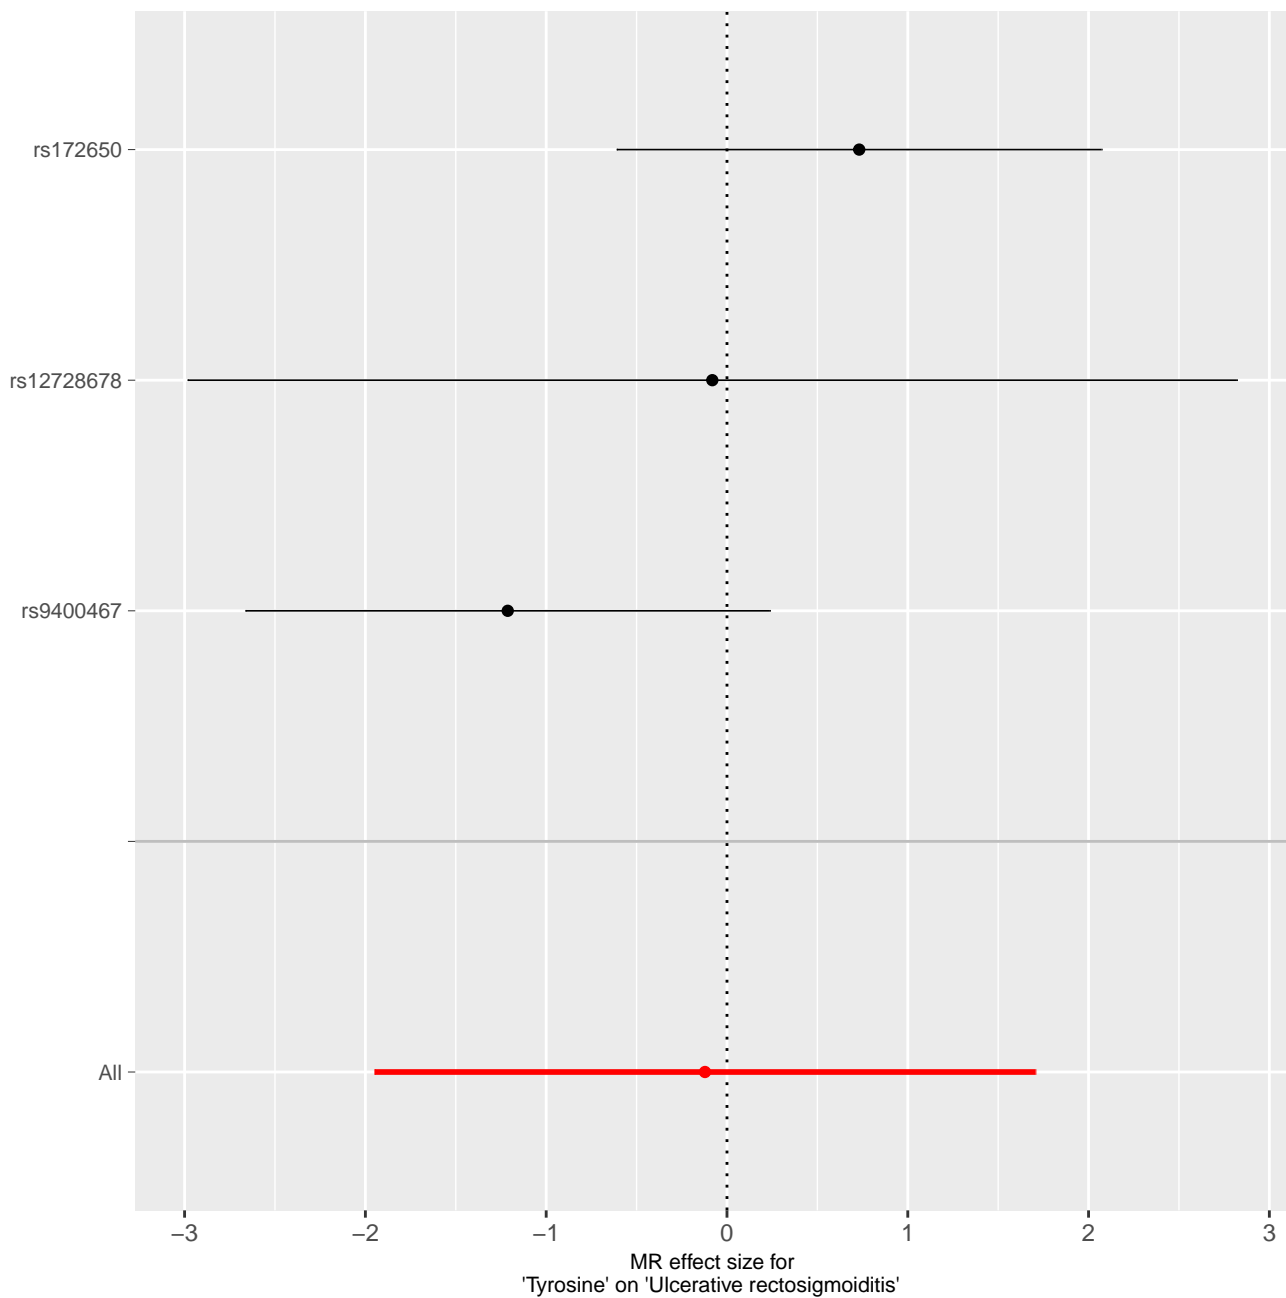

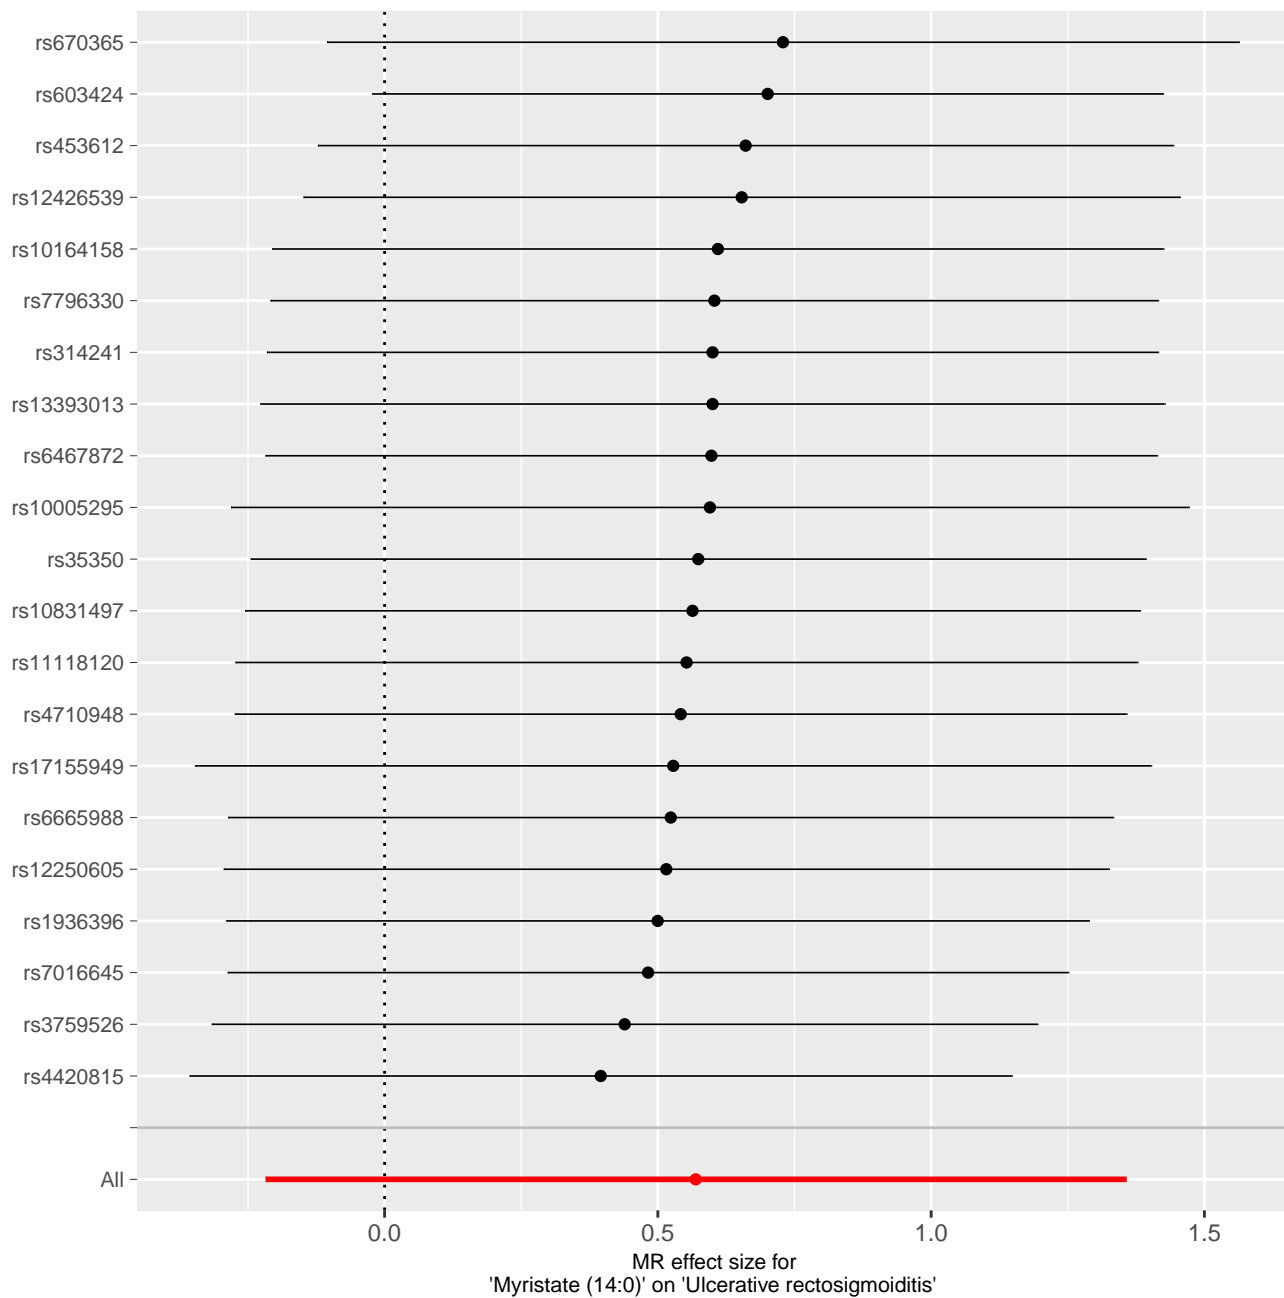

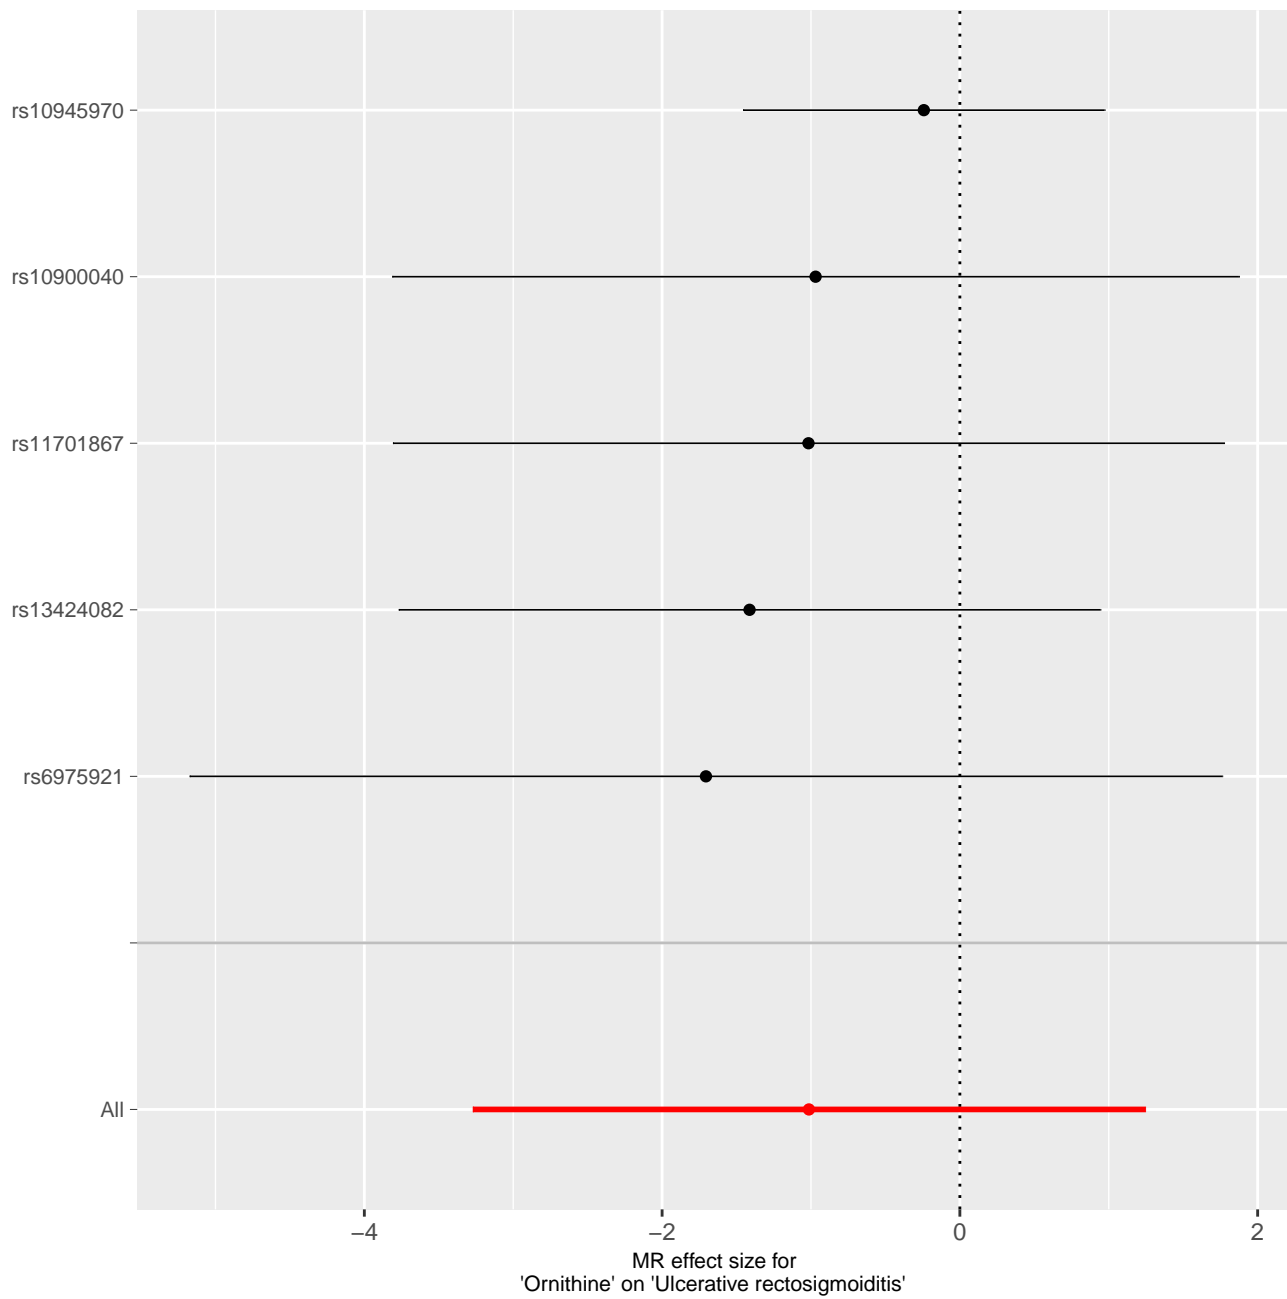

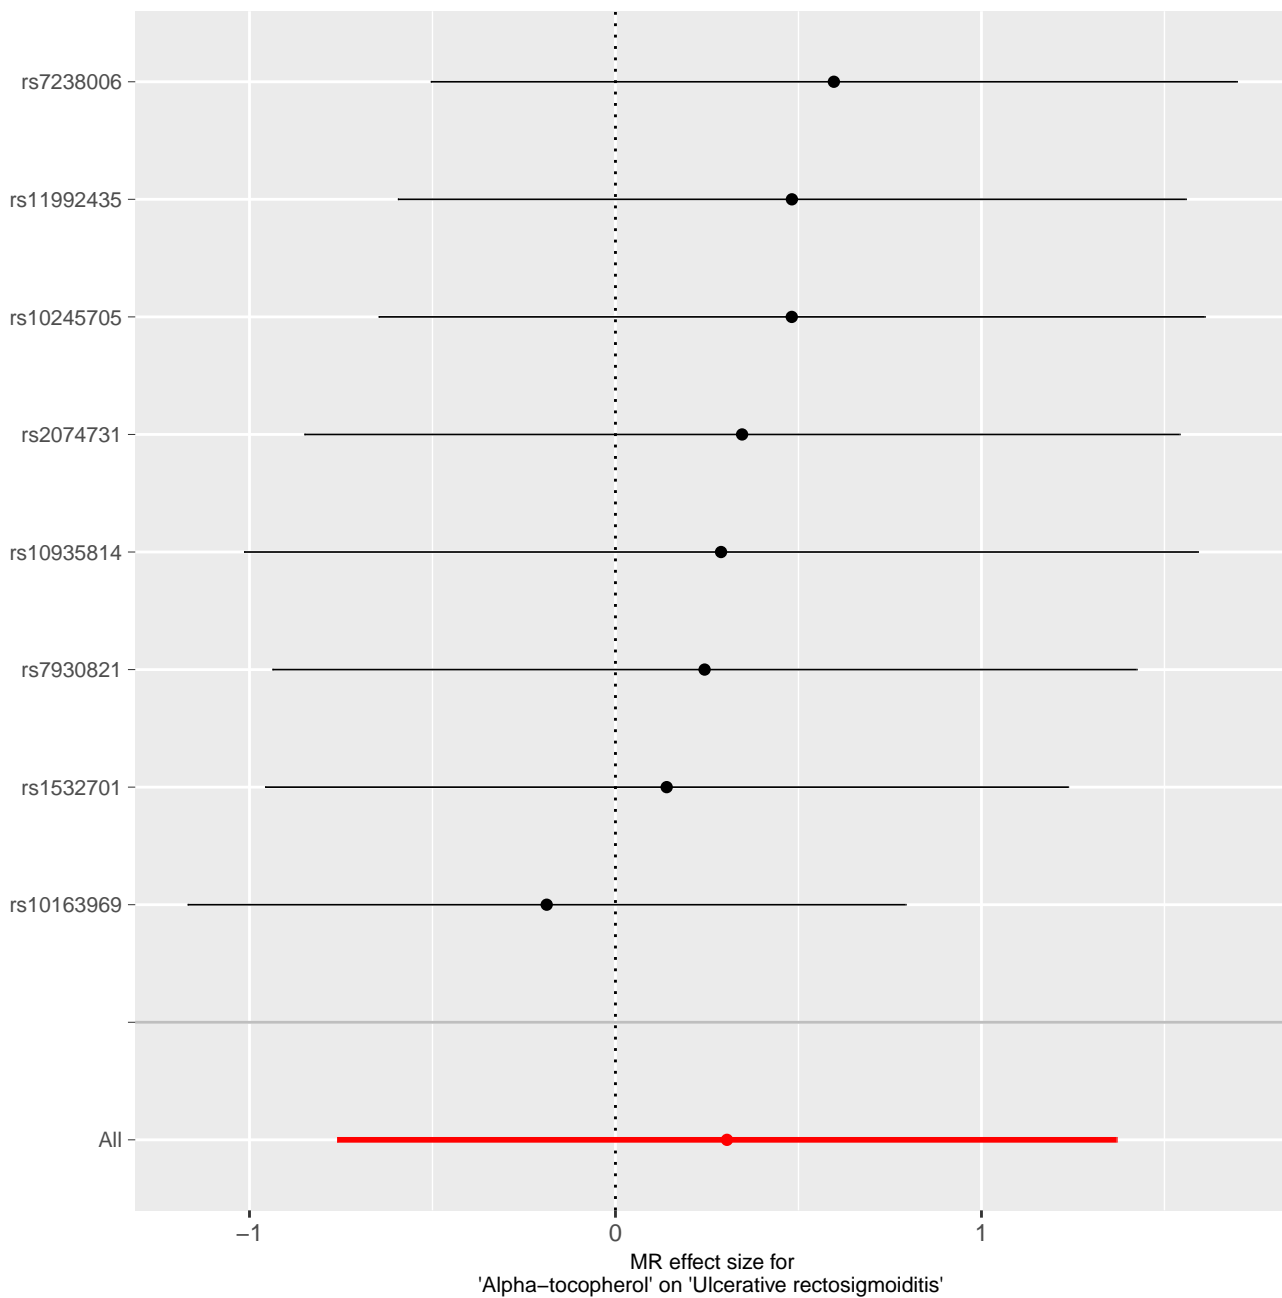



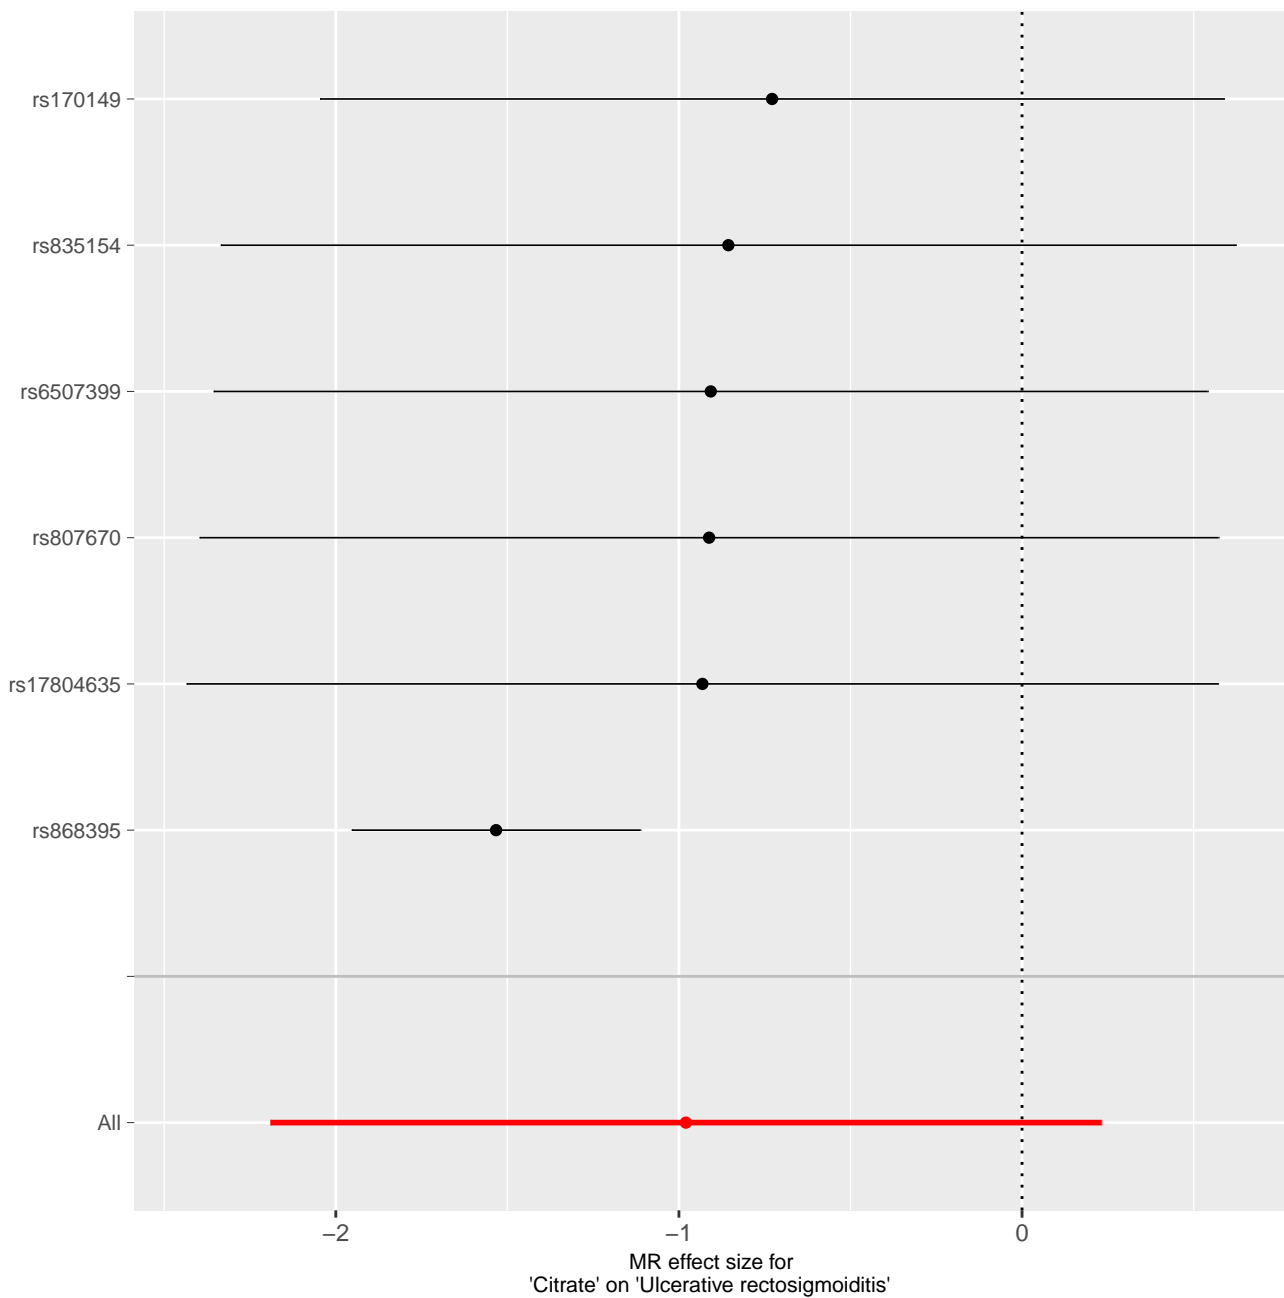

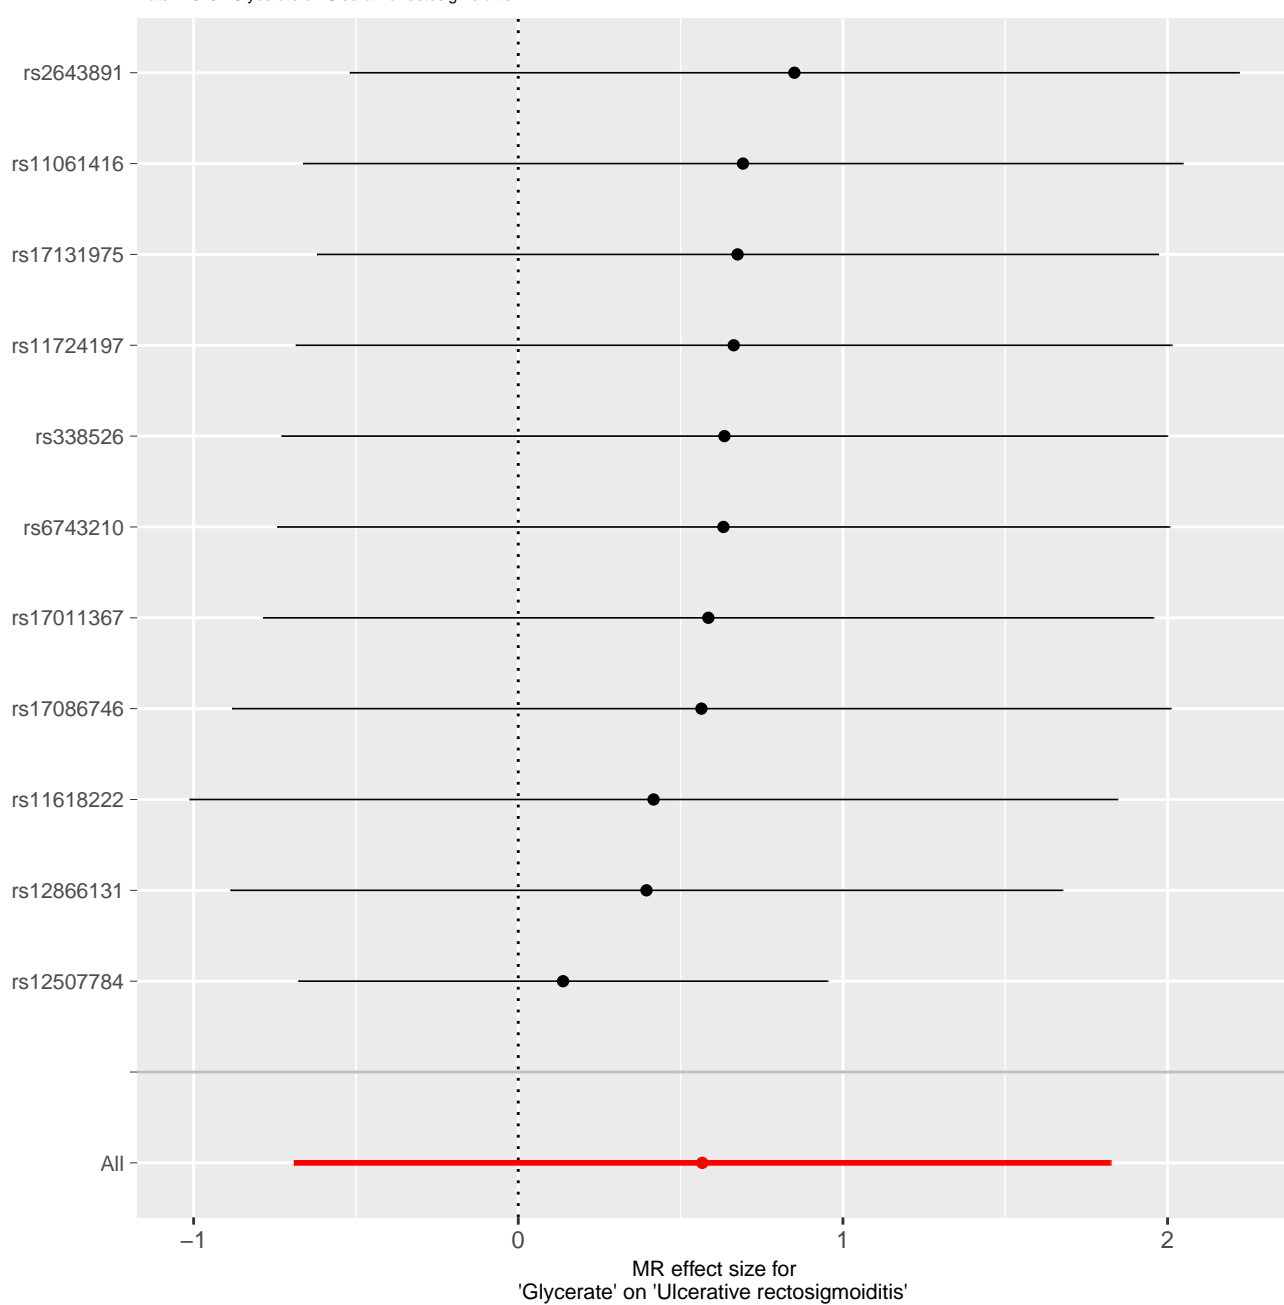

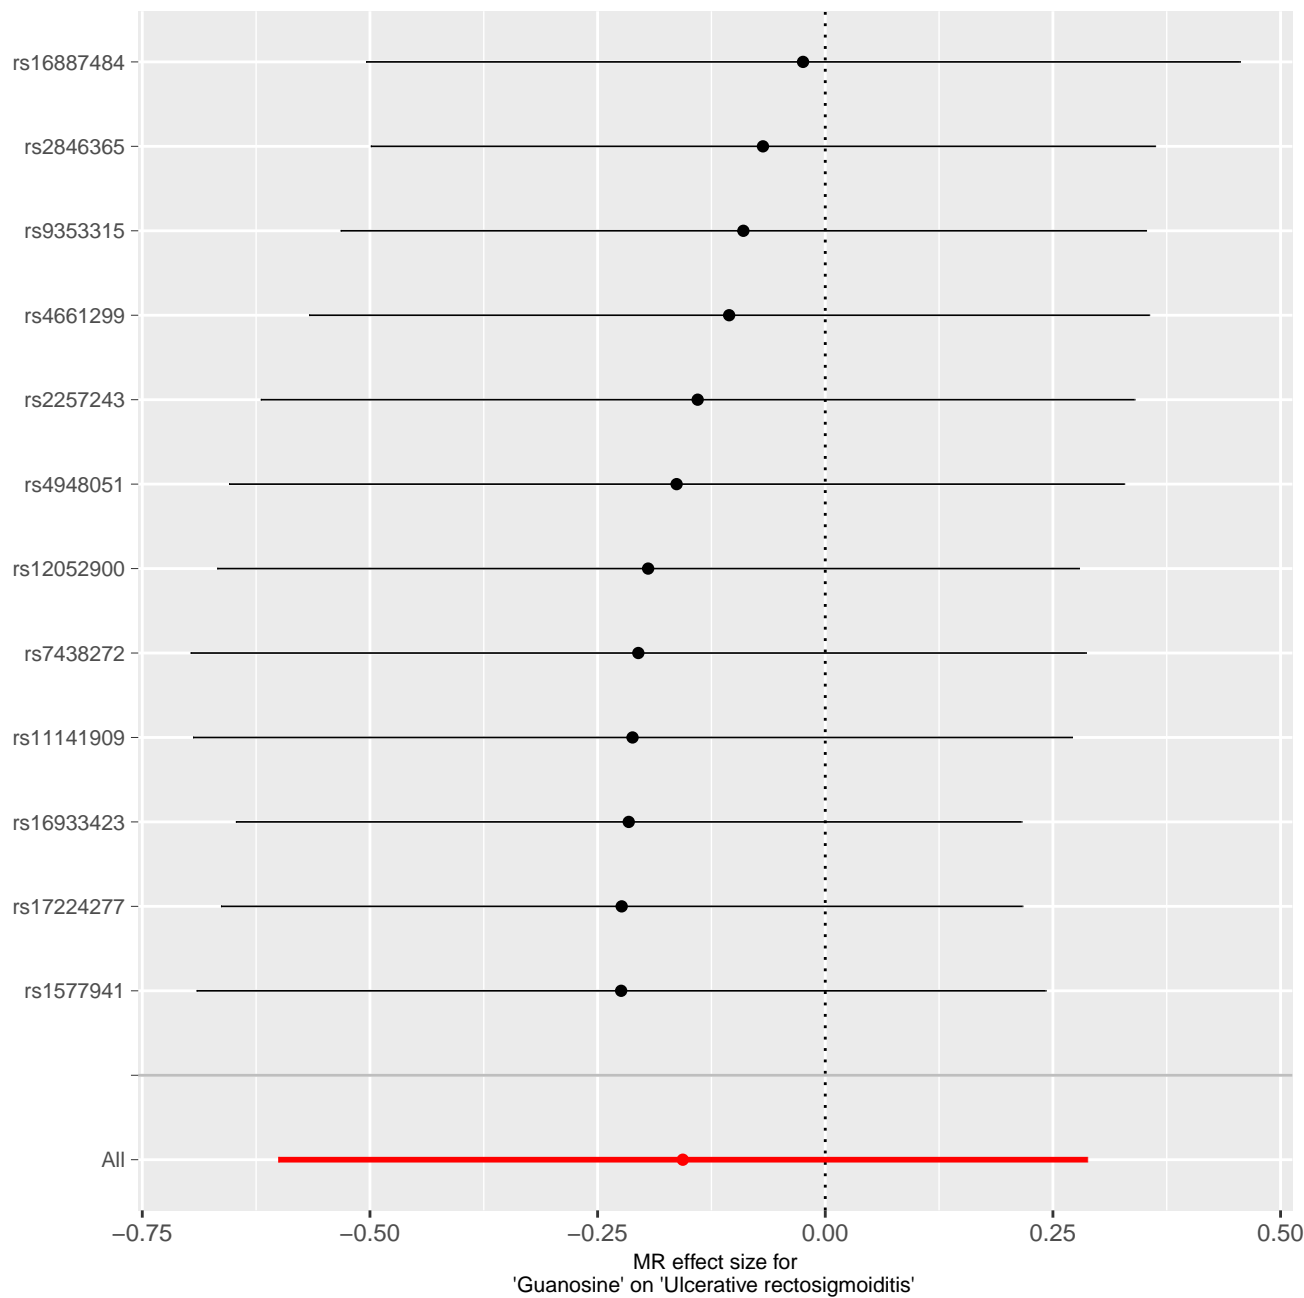

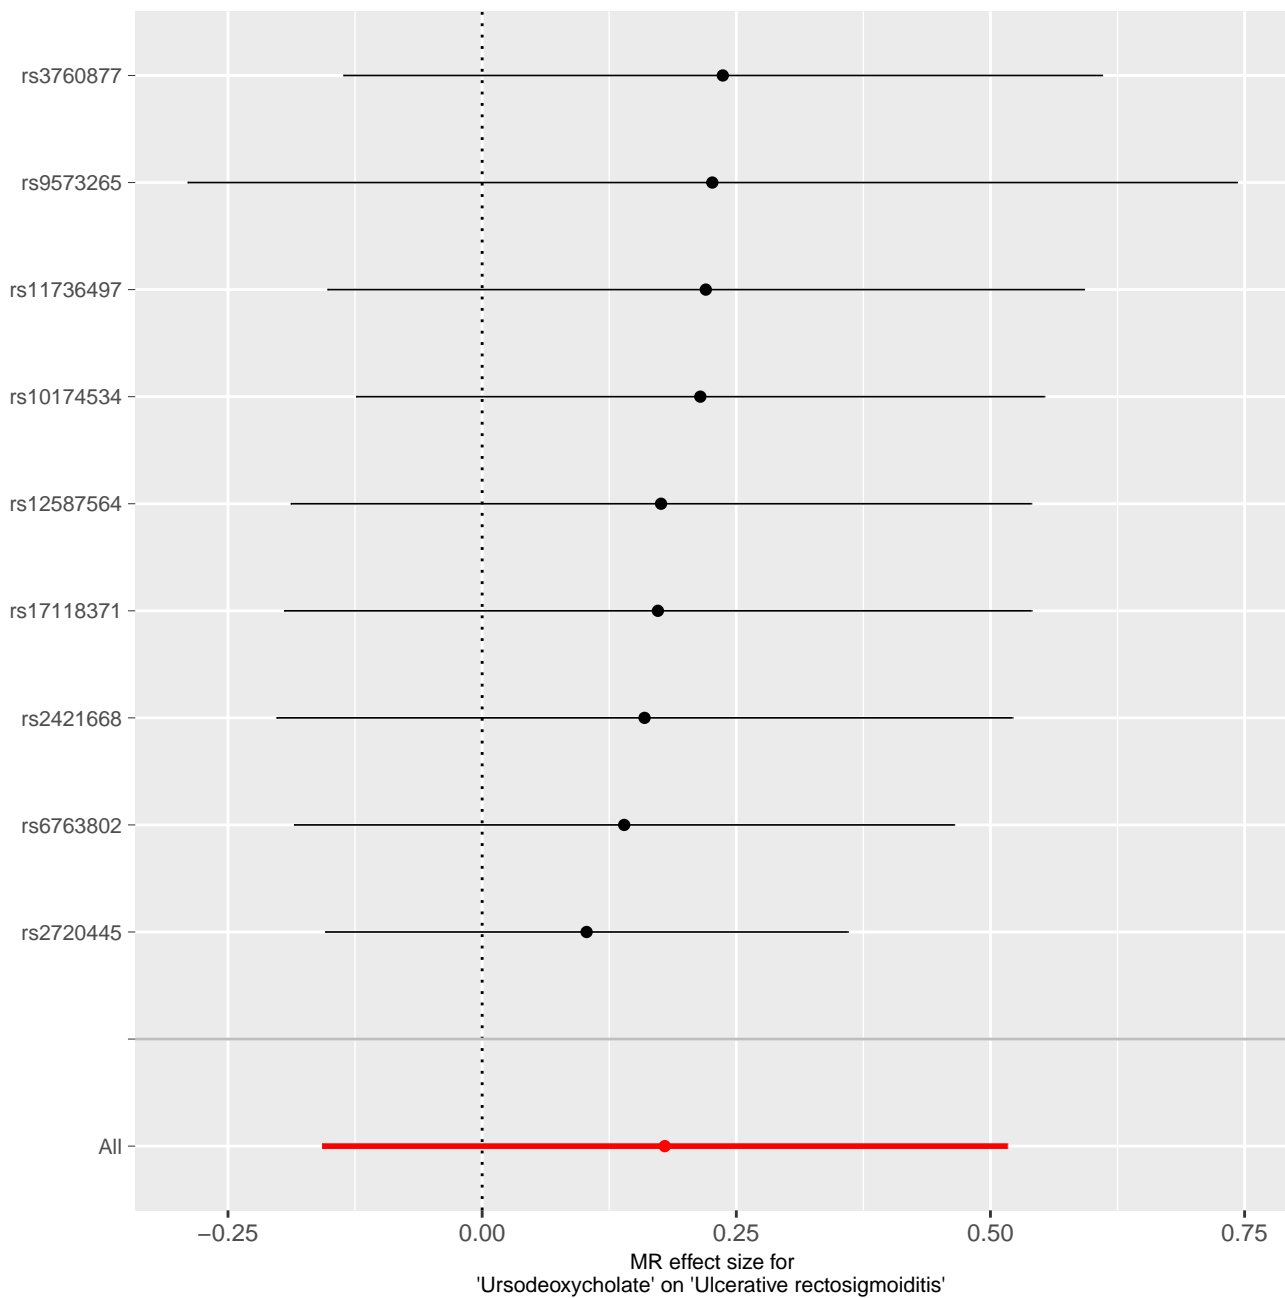

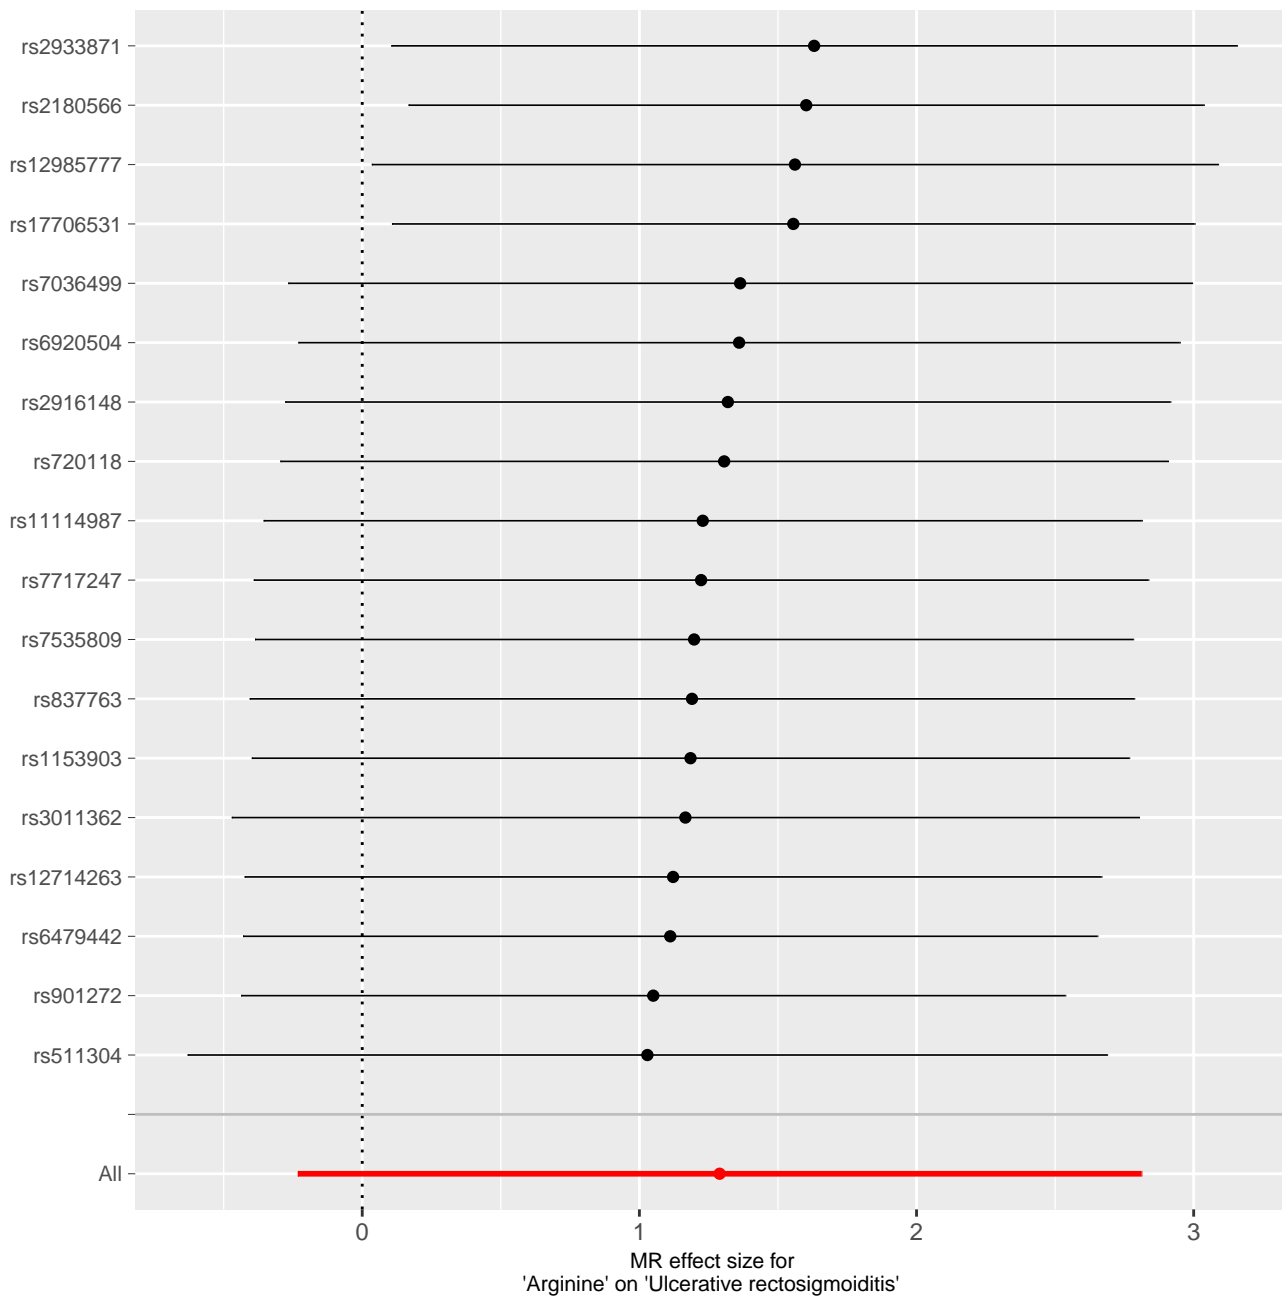

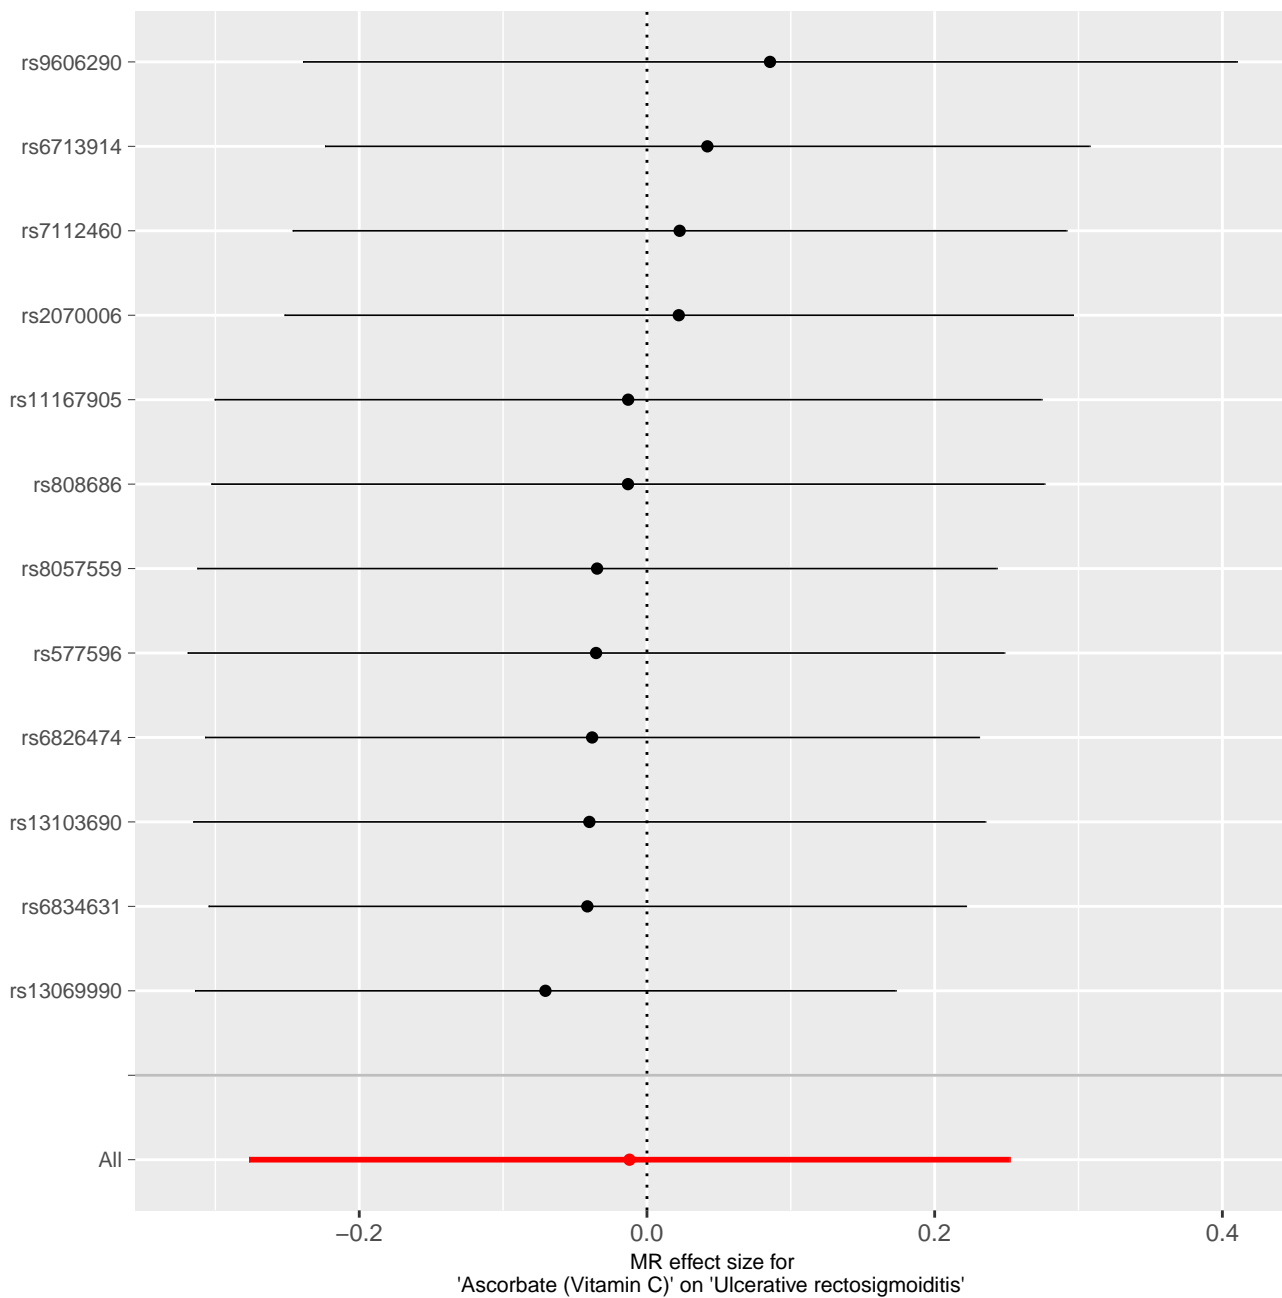

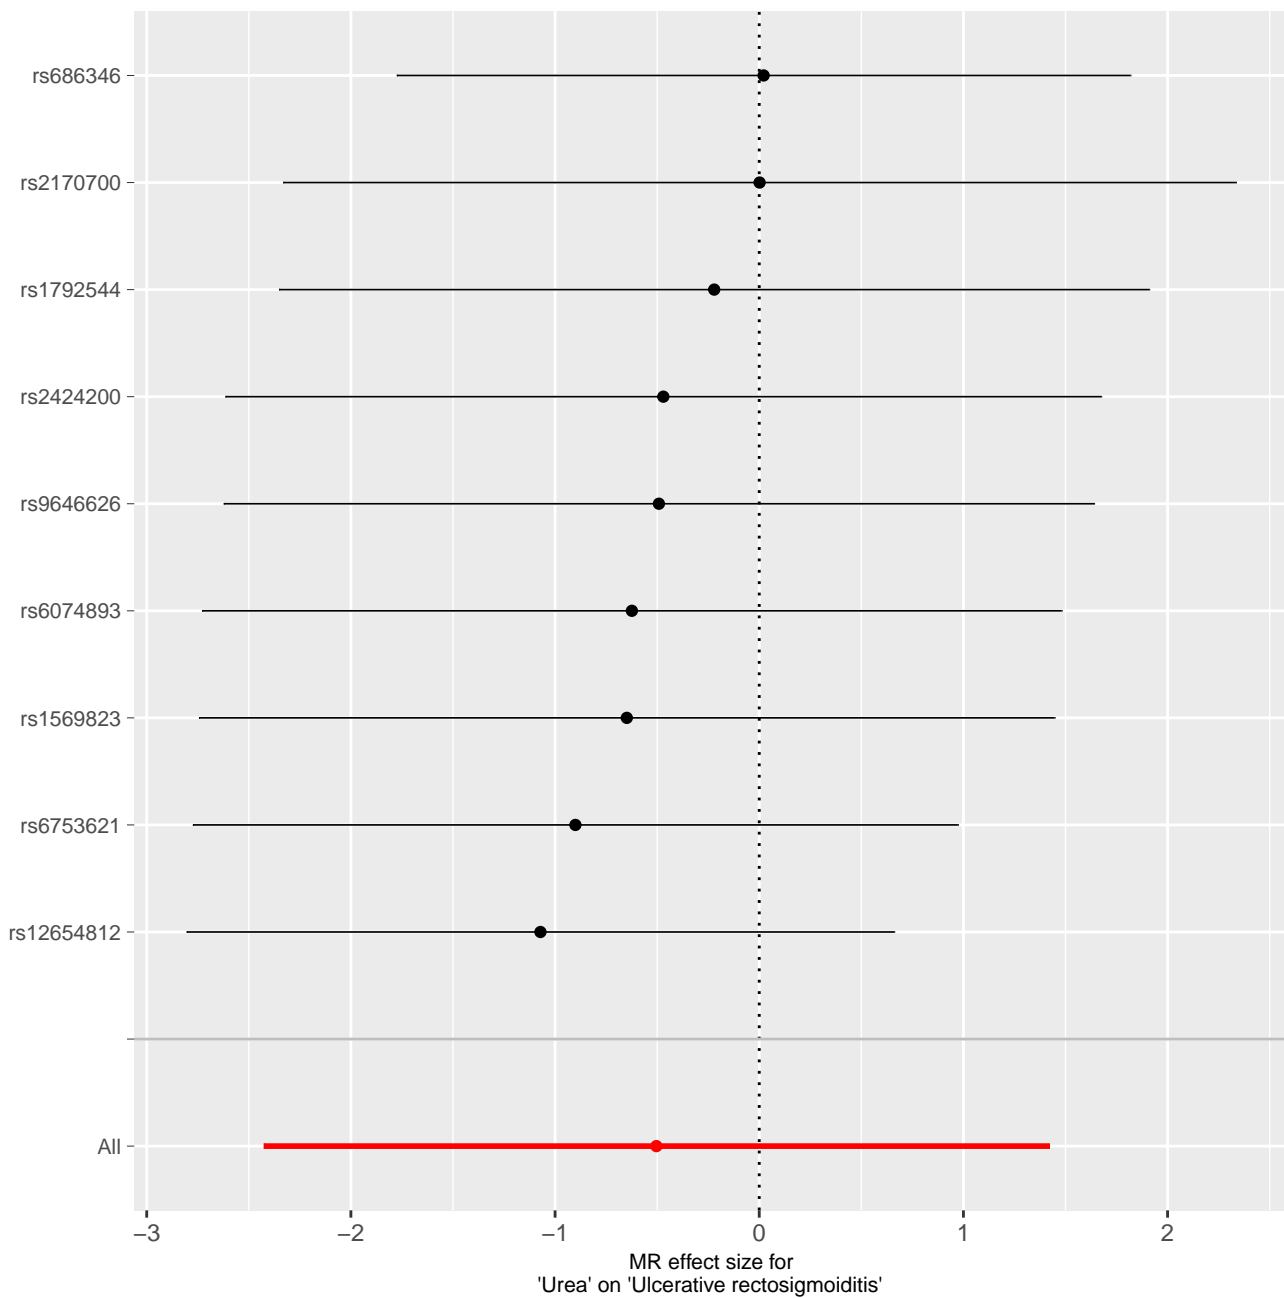

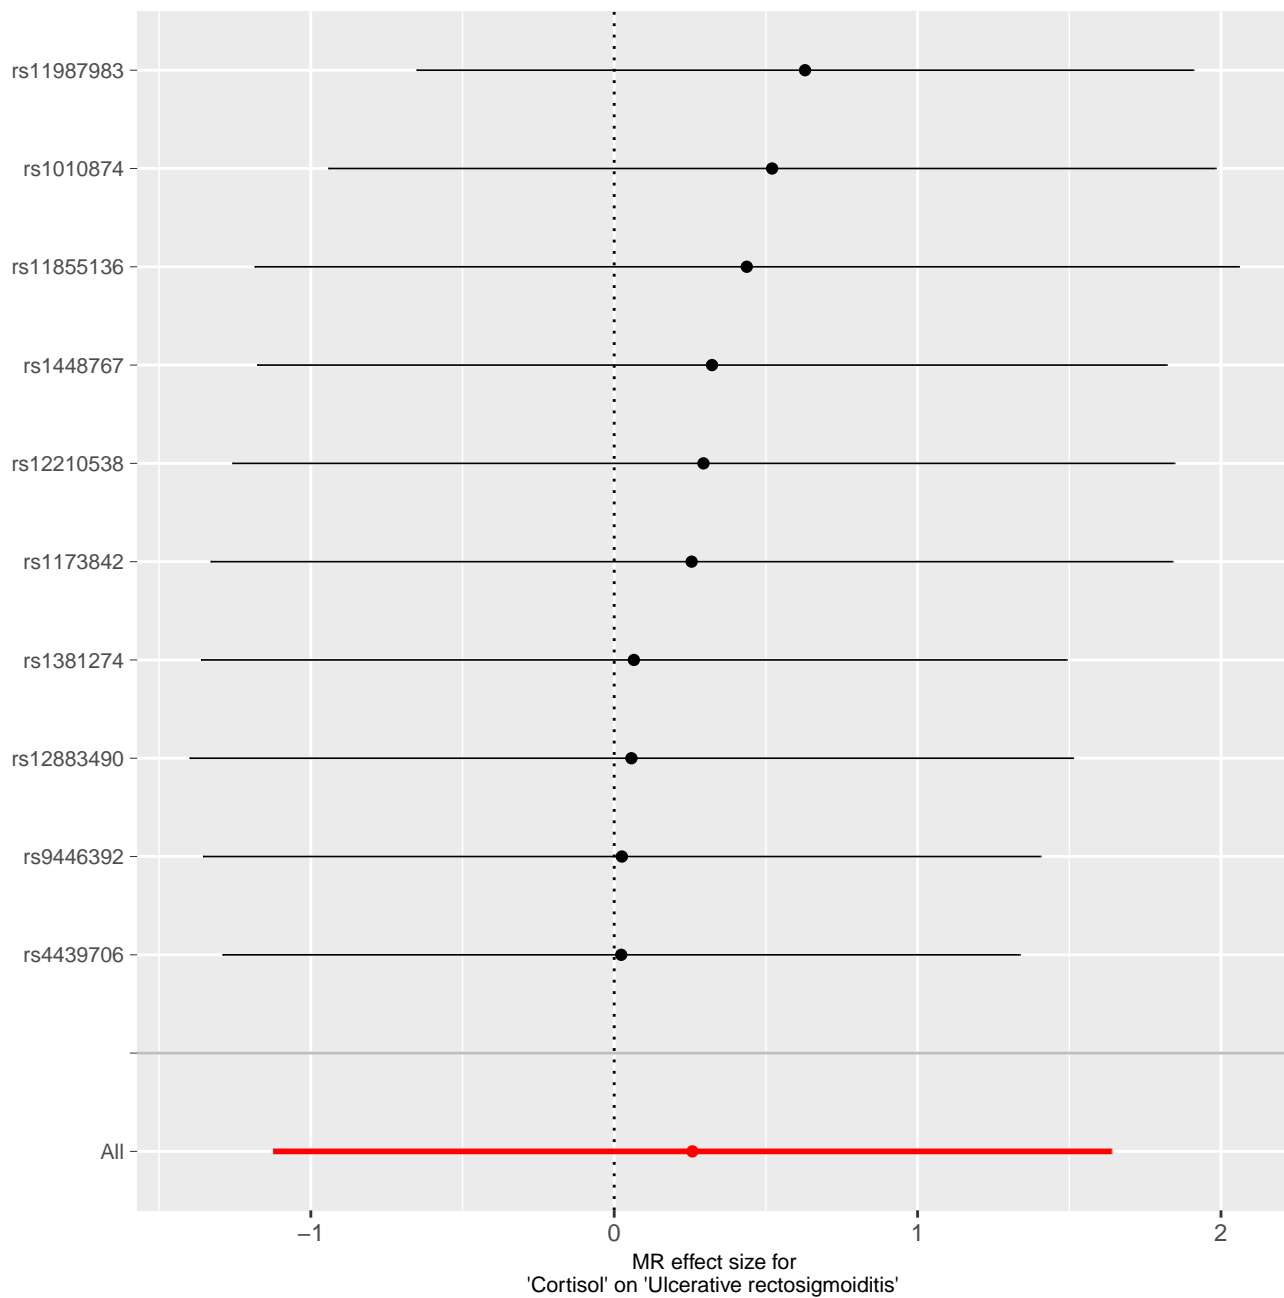



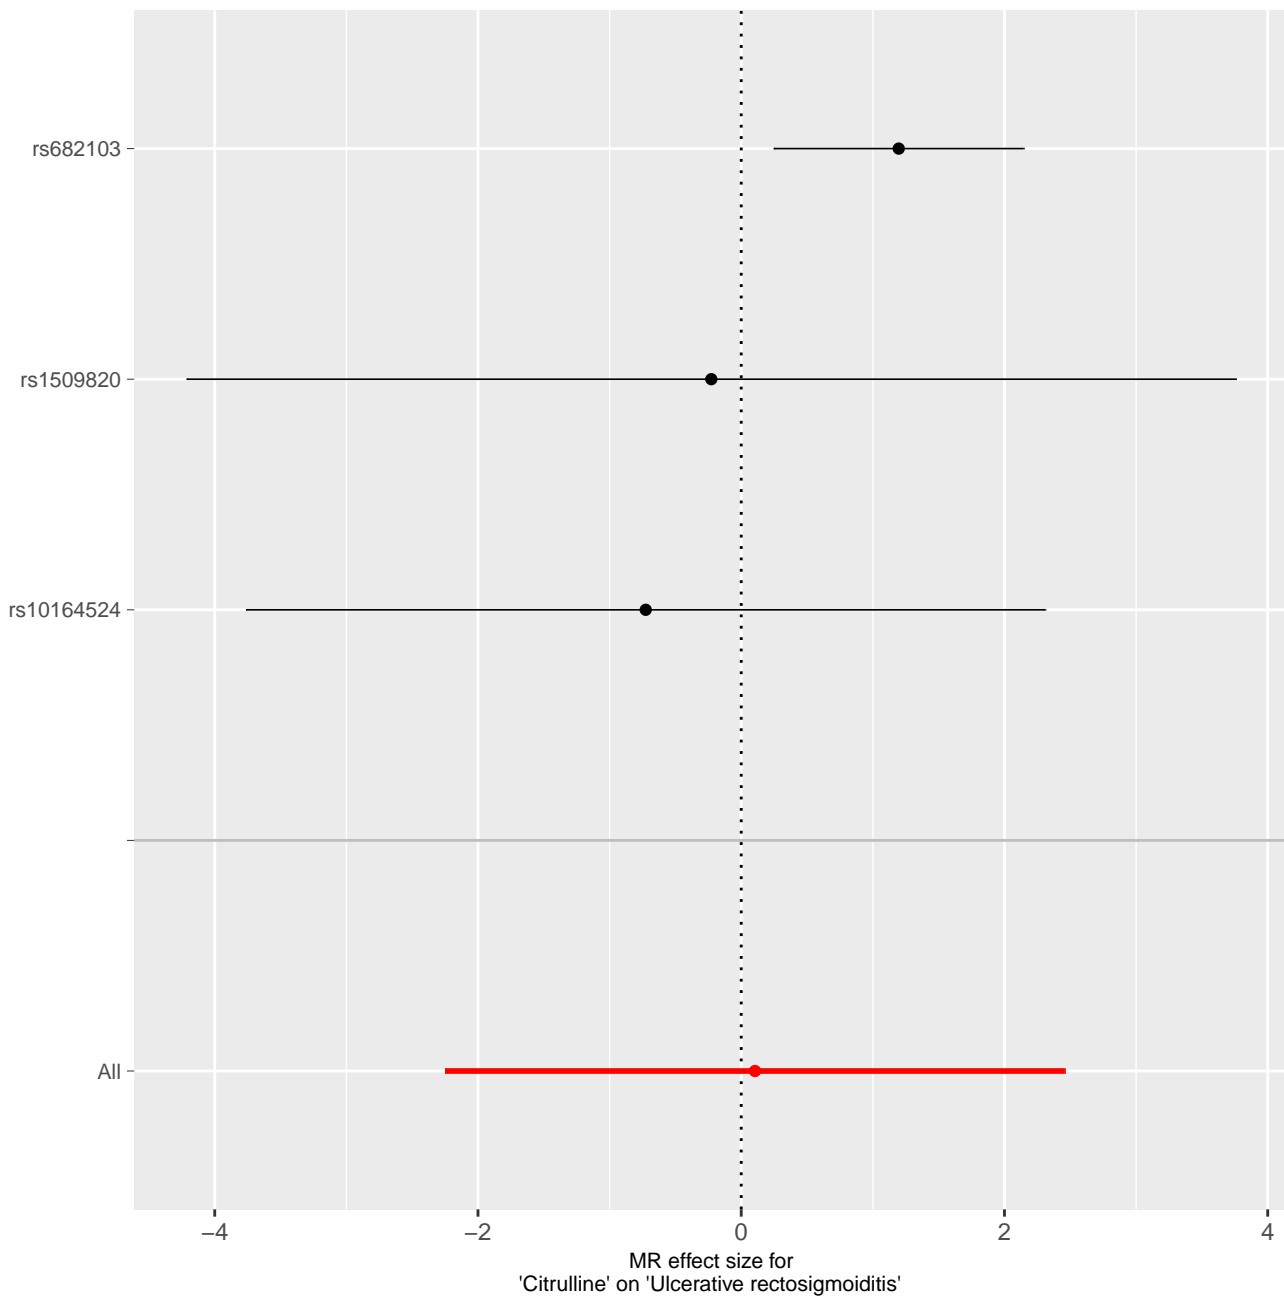

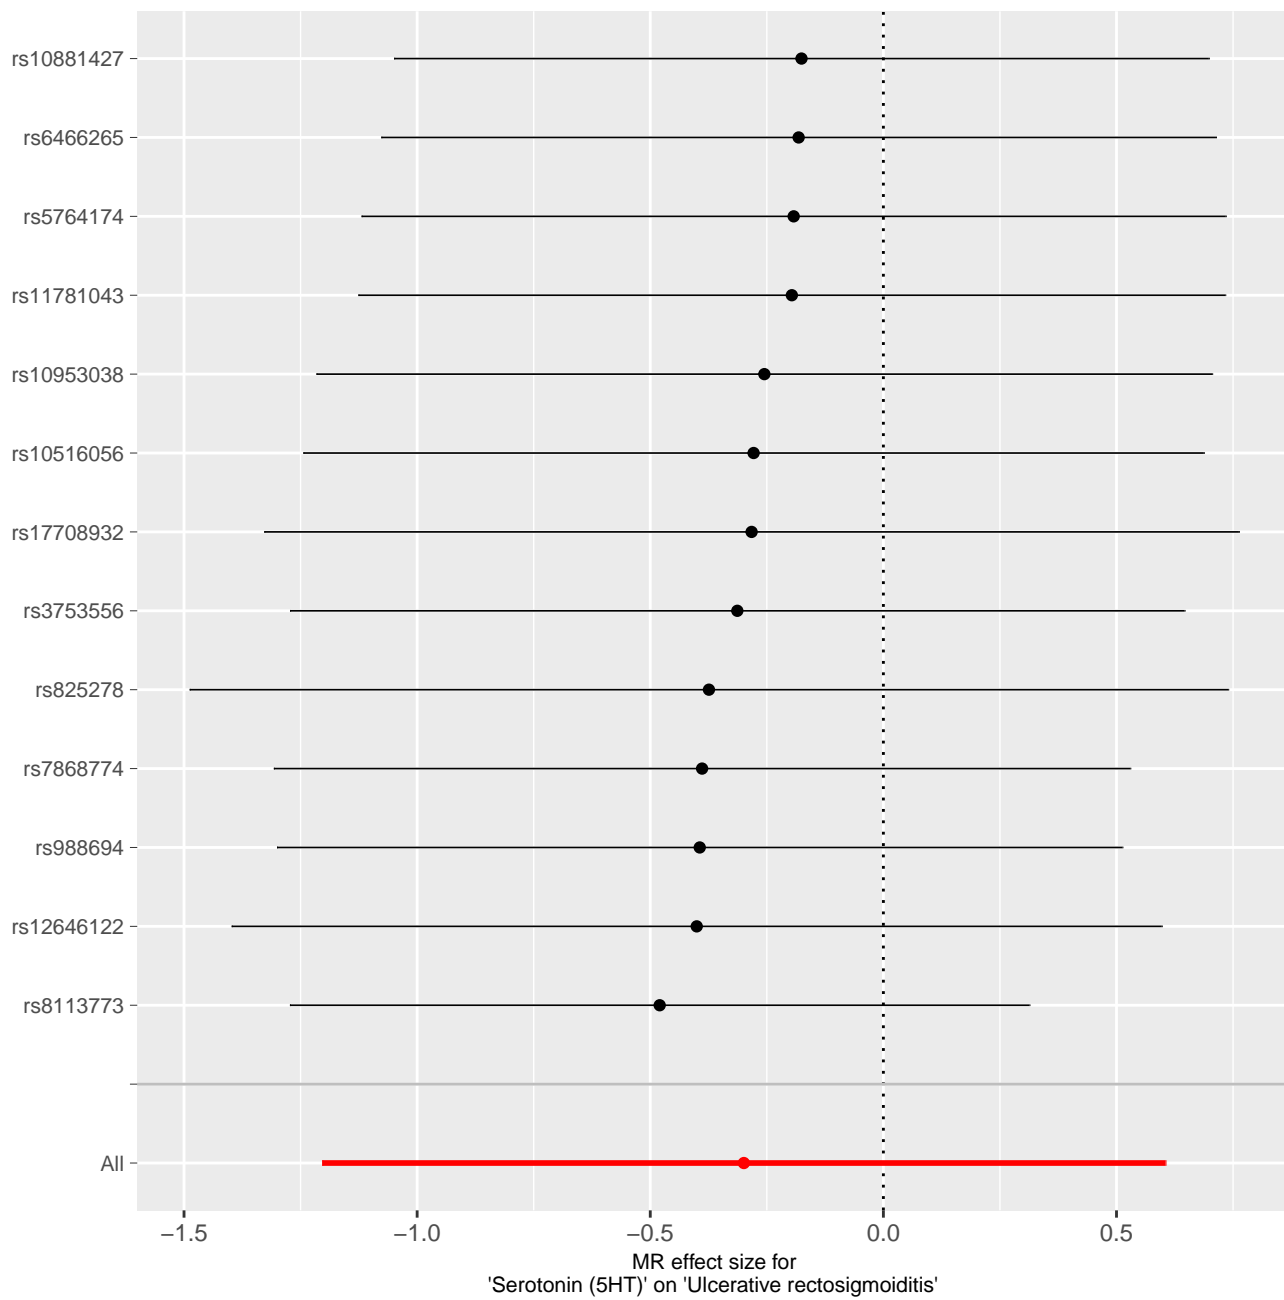

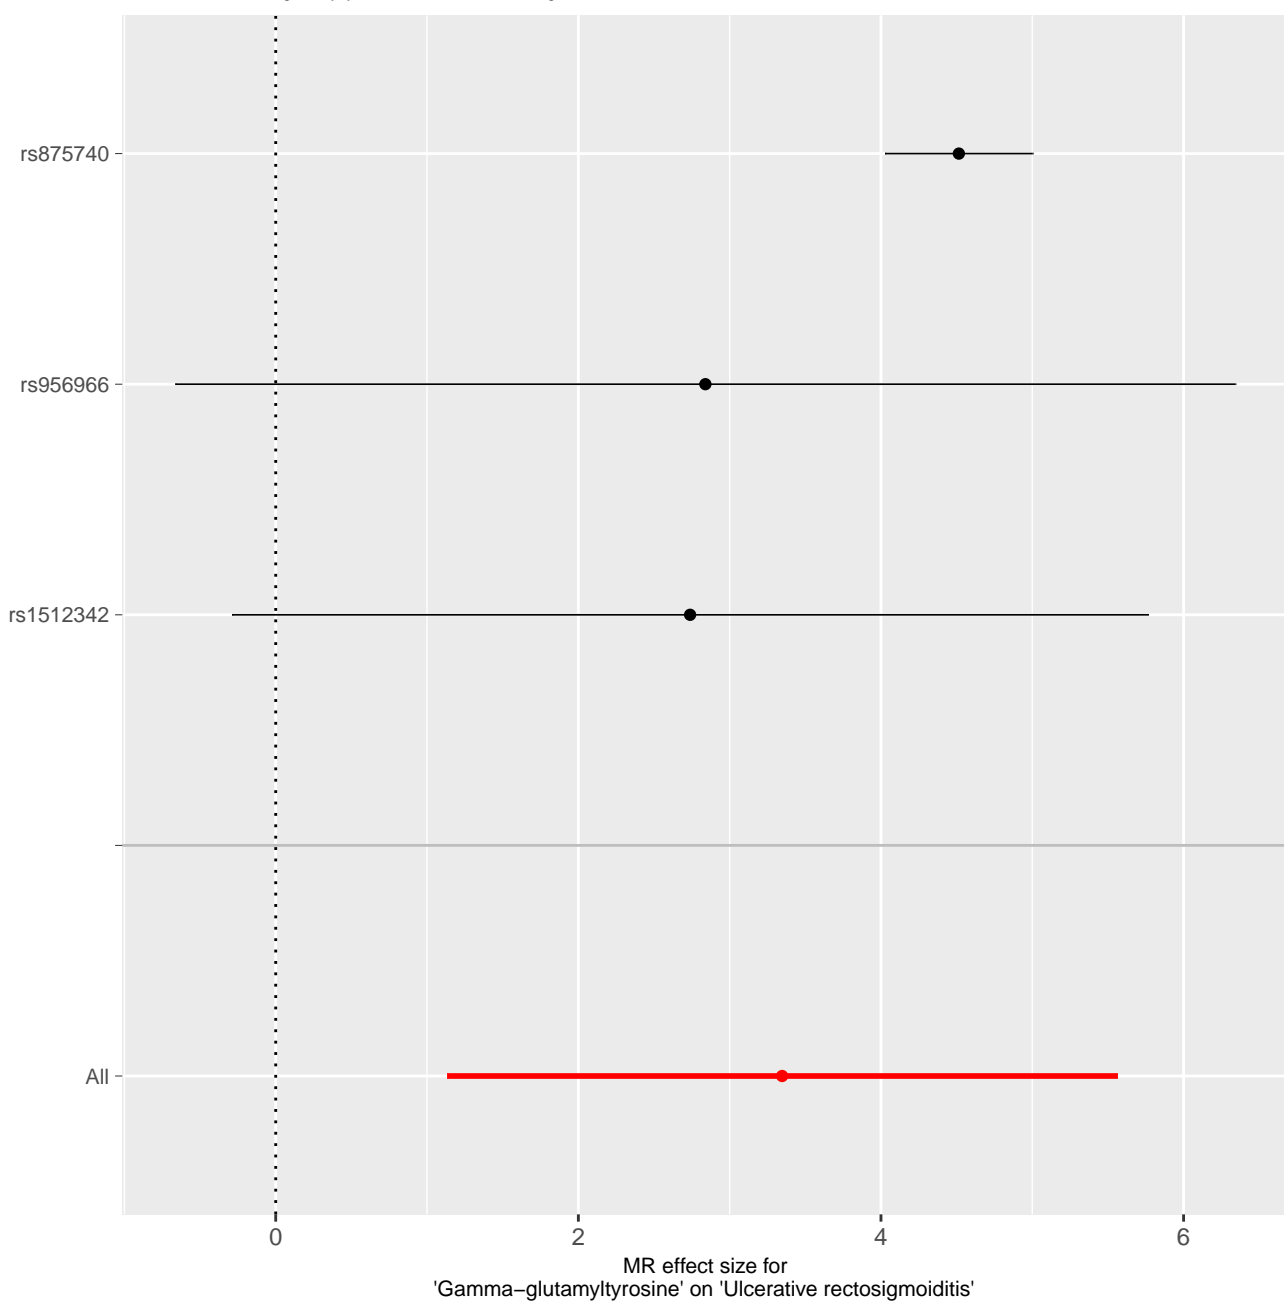

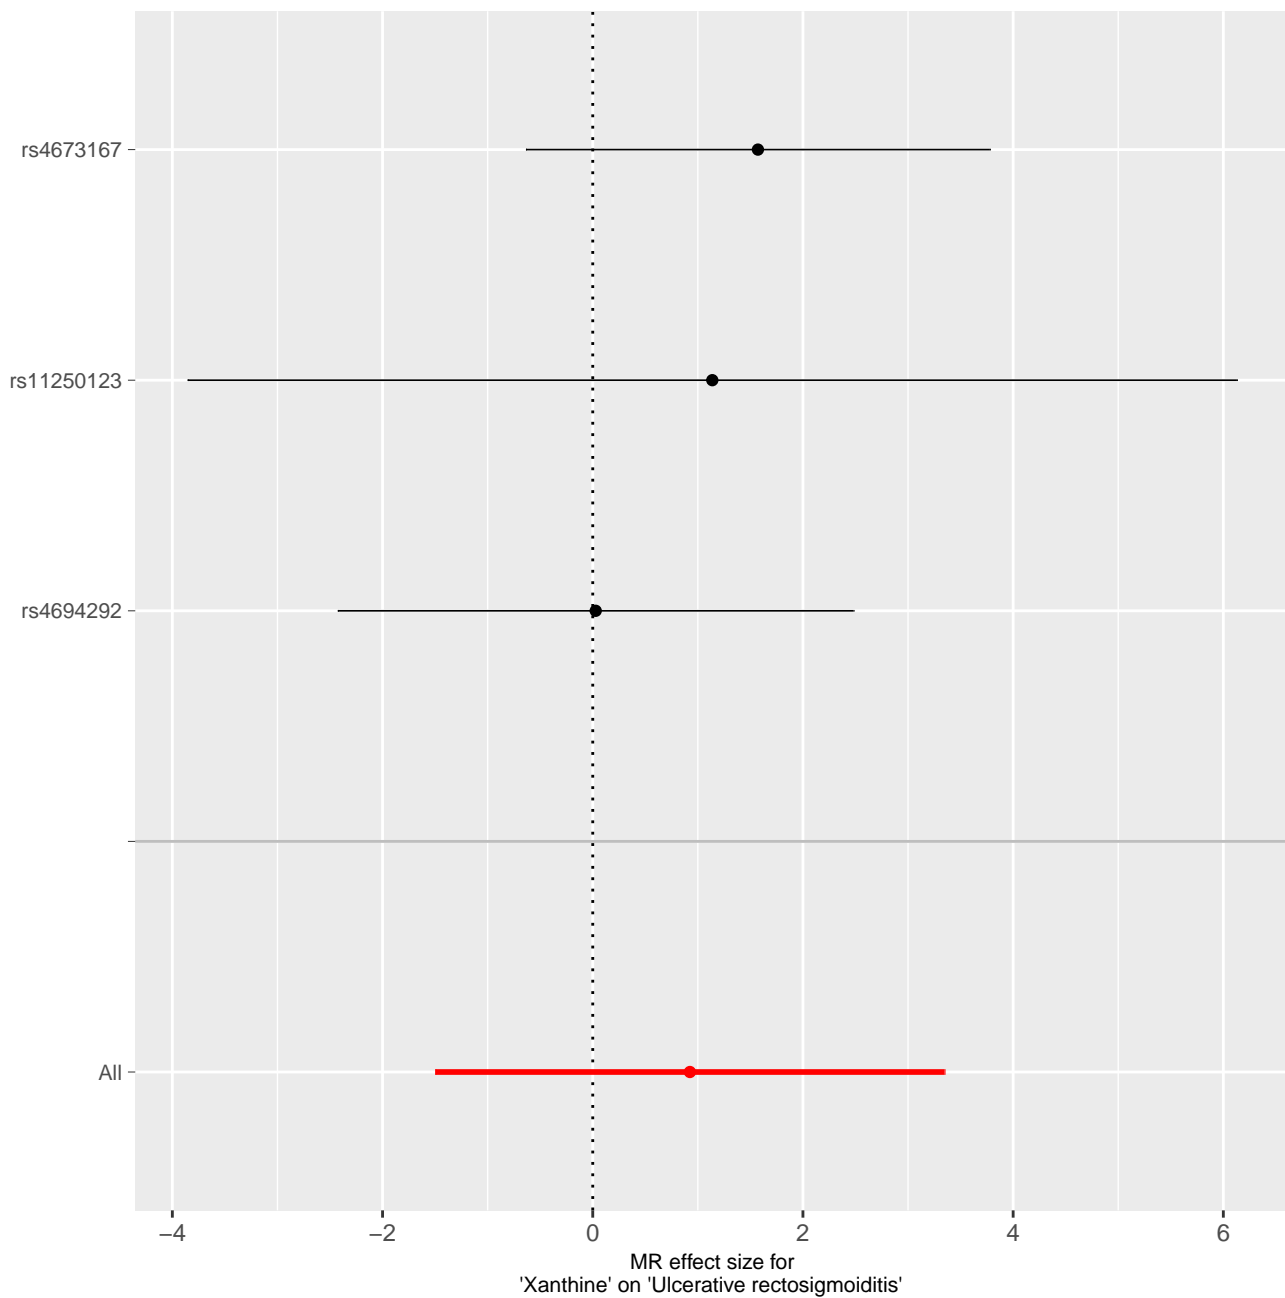

rs6126354

rs10404980

rs1466522

rs4641759

All

0.0

2.5

MR effect size for  
'Phosphate' on 'Ulcerative rectosigmoiditis'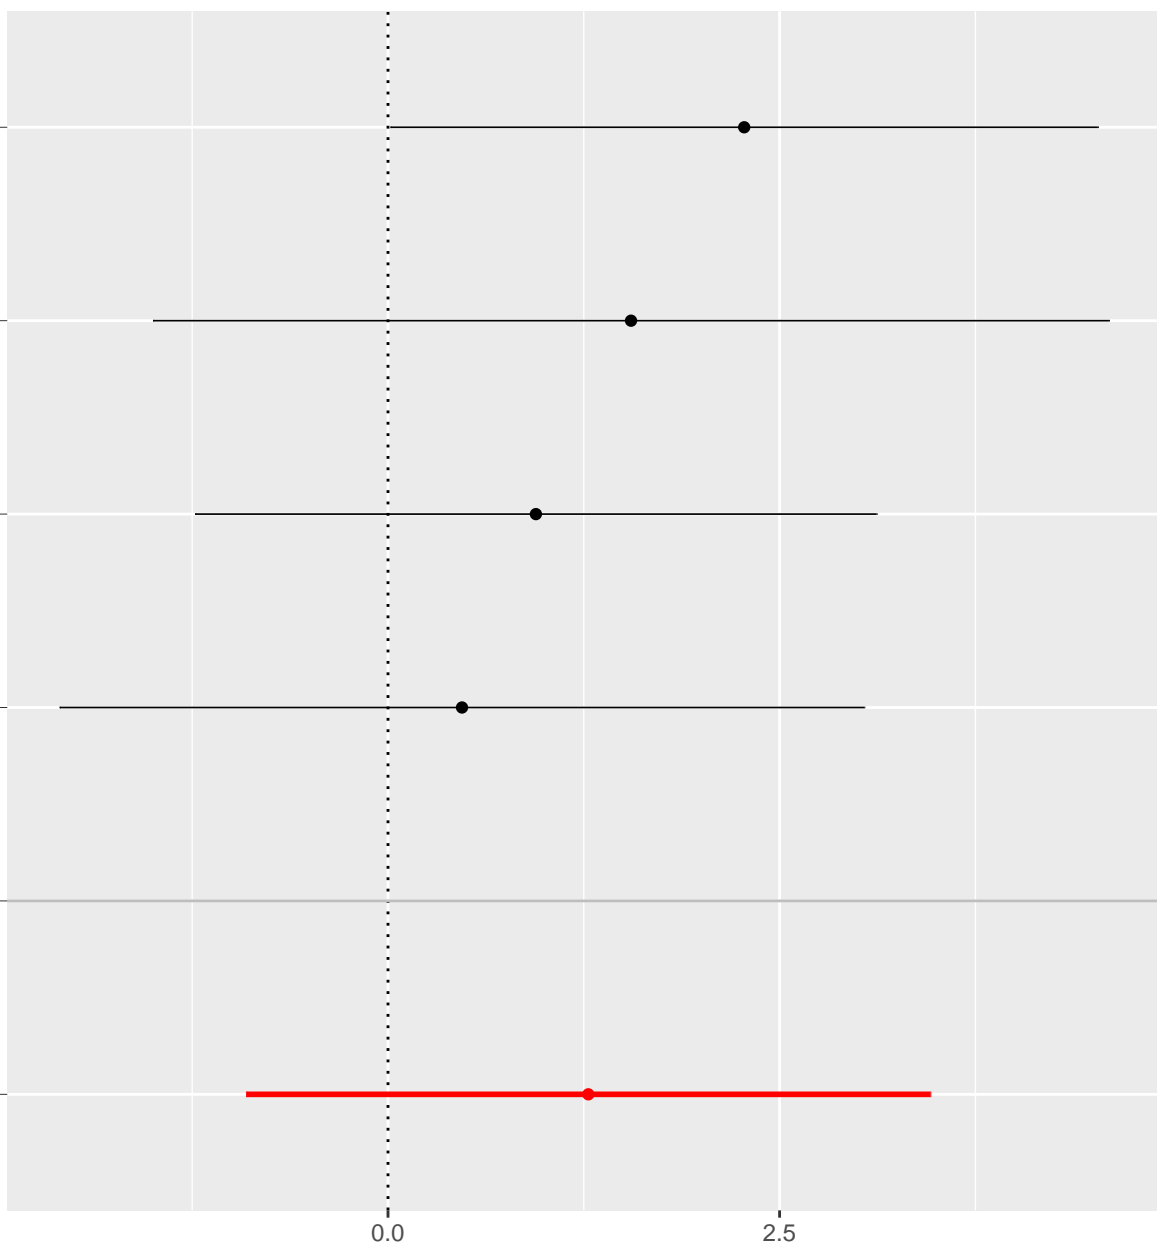

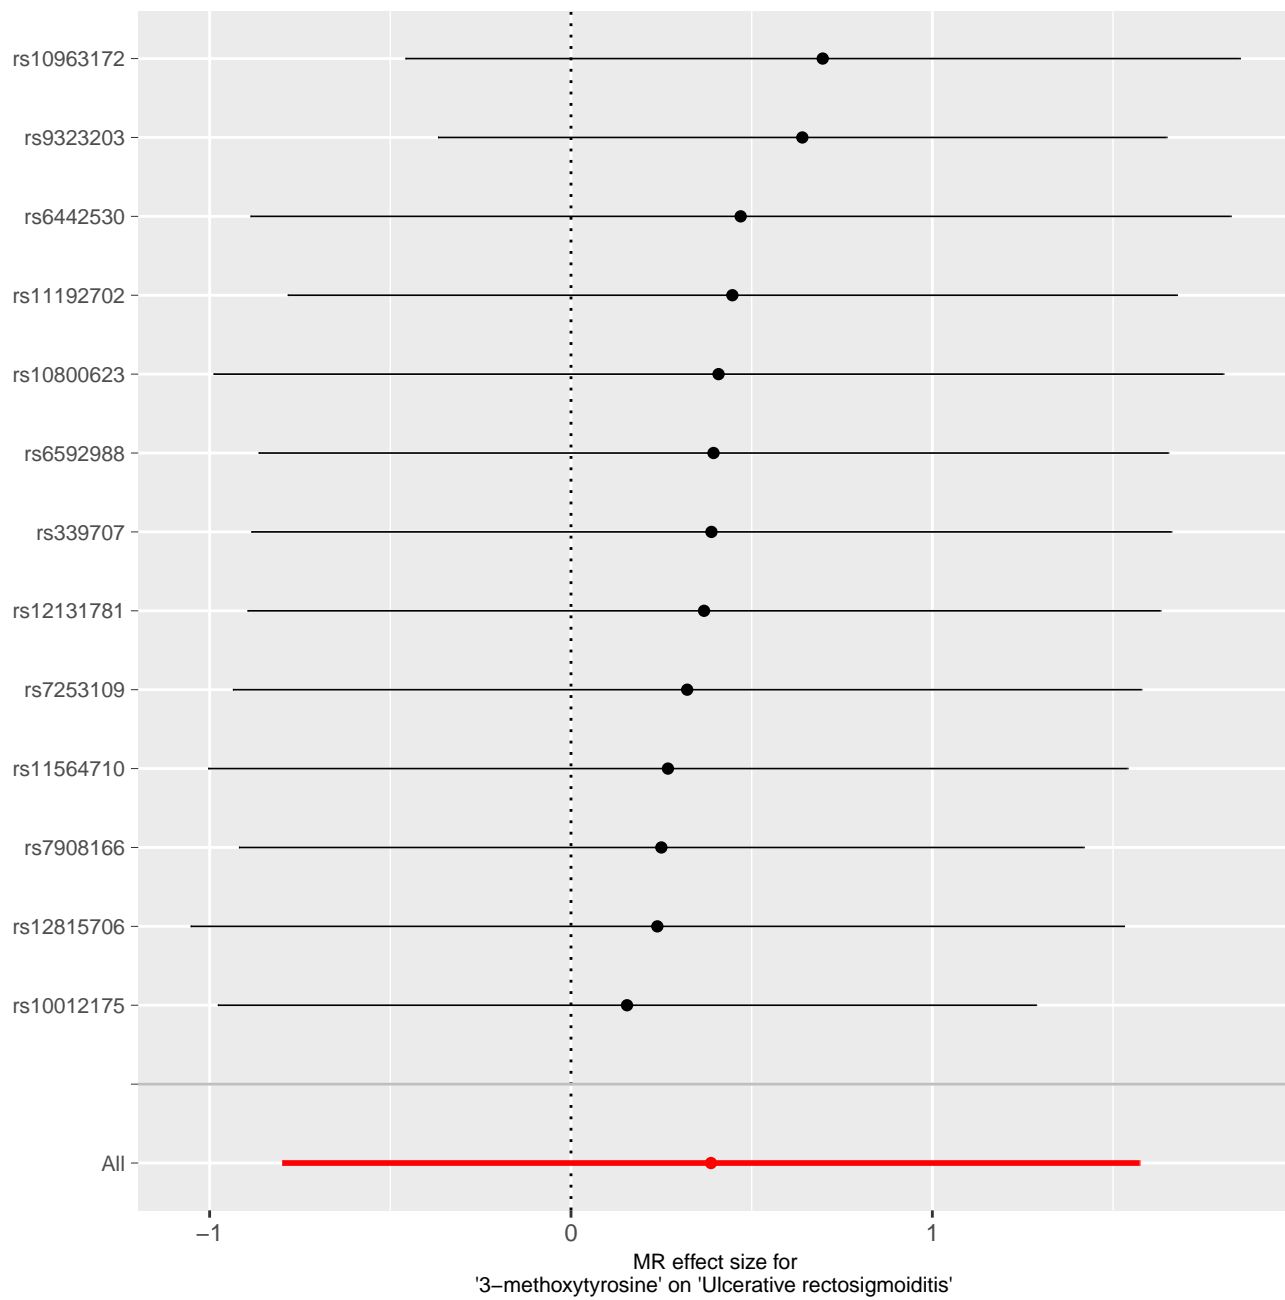

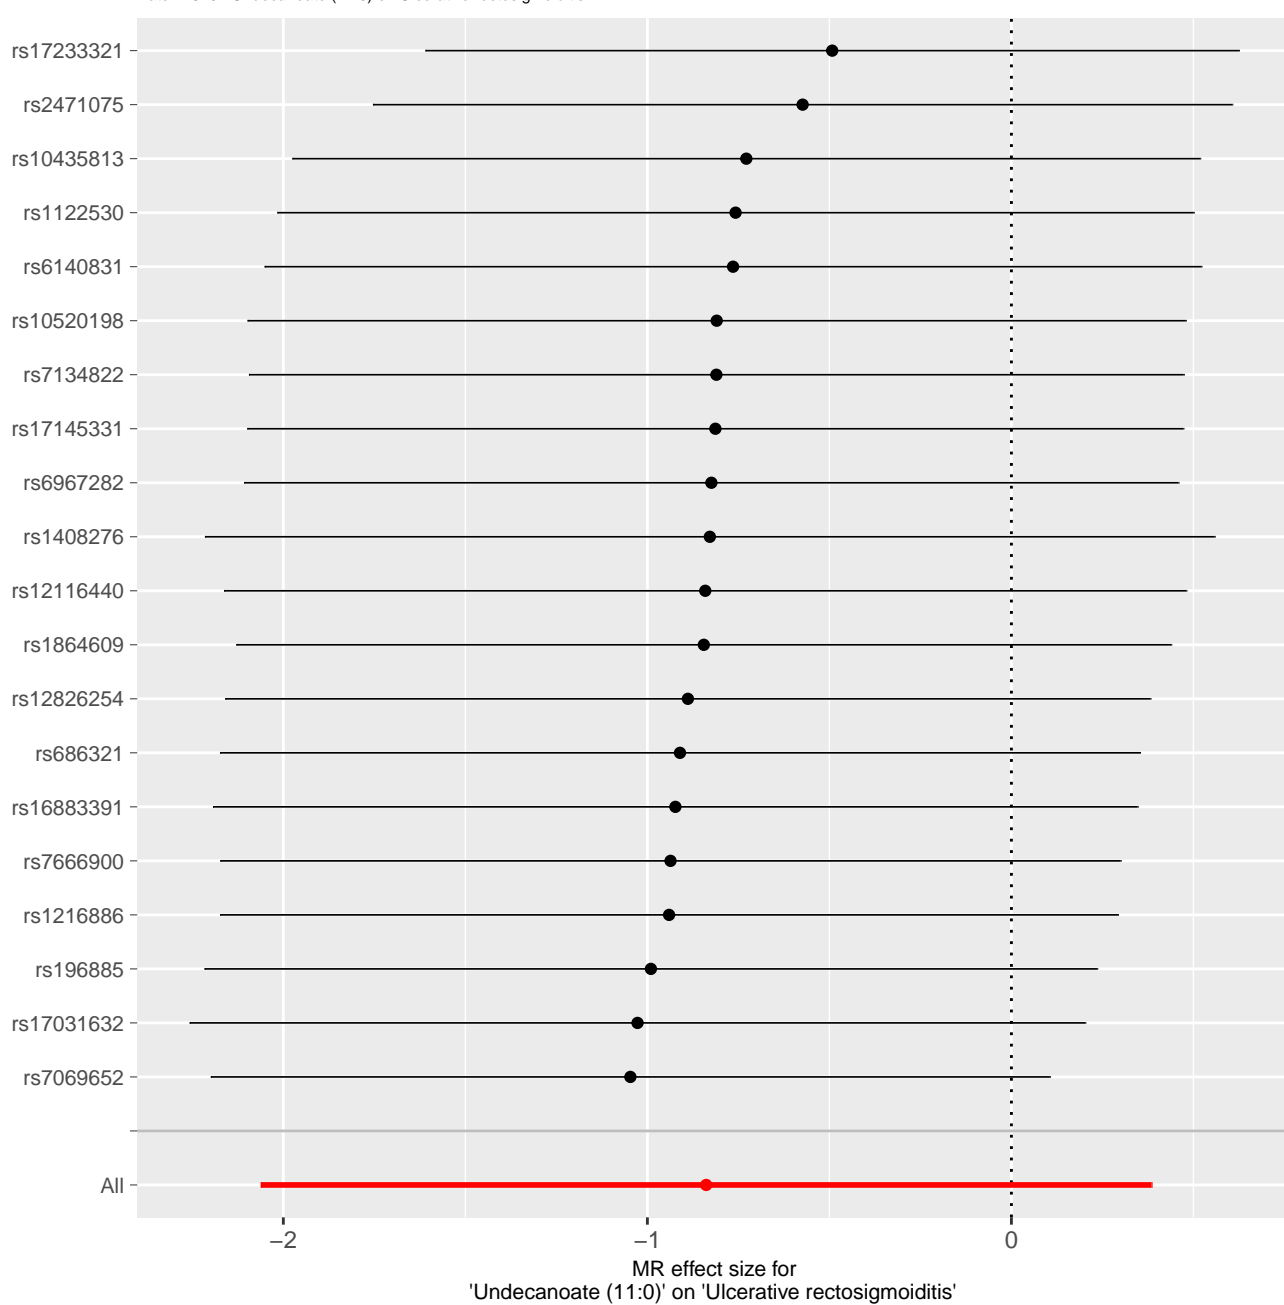

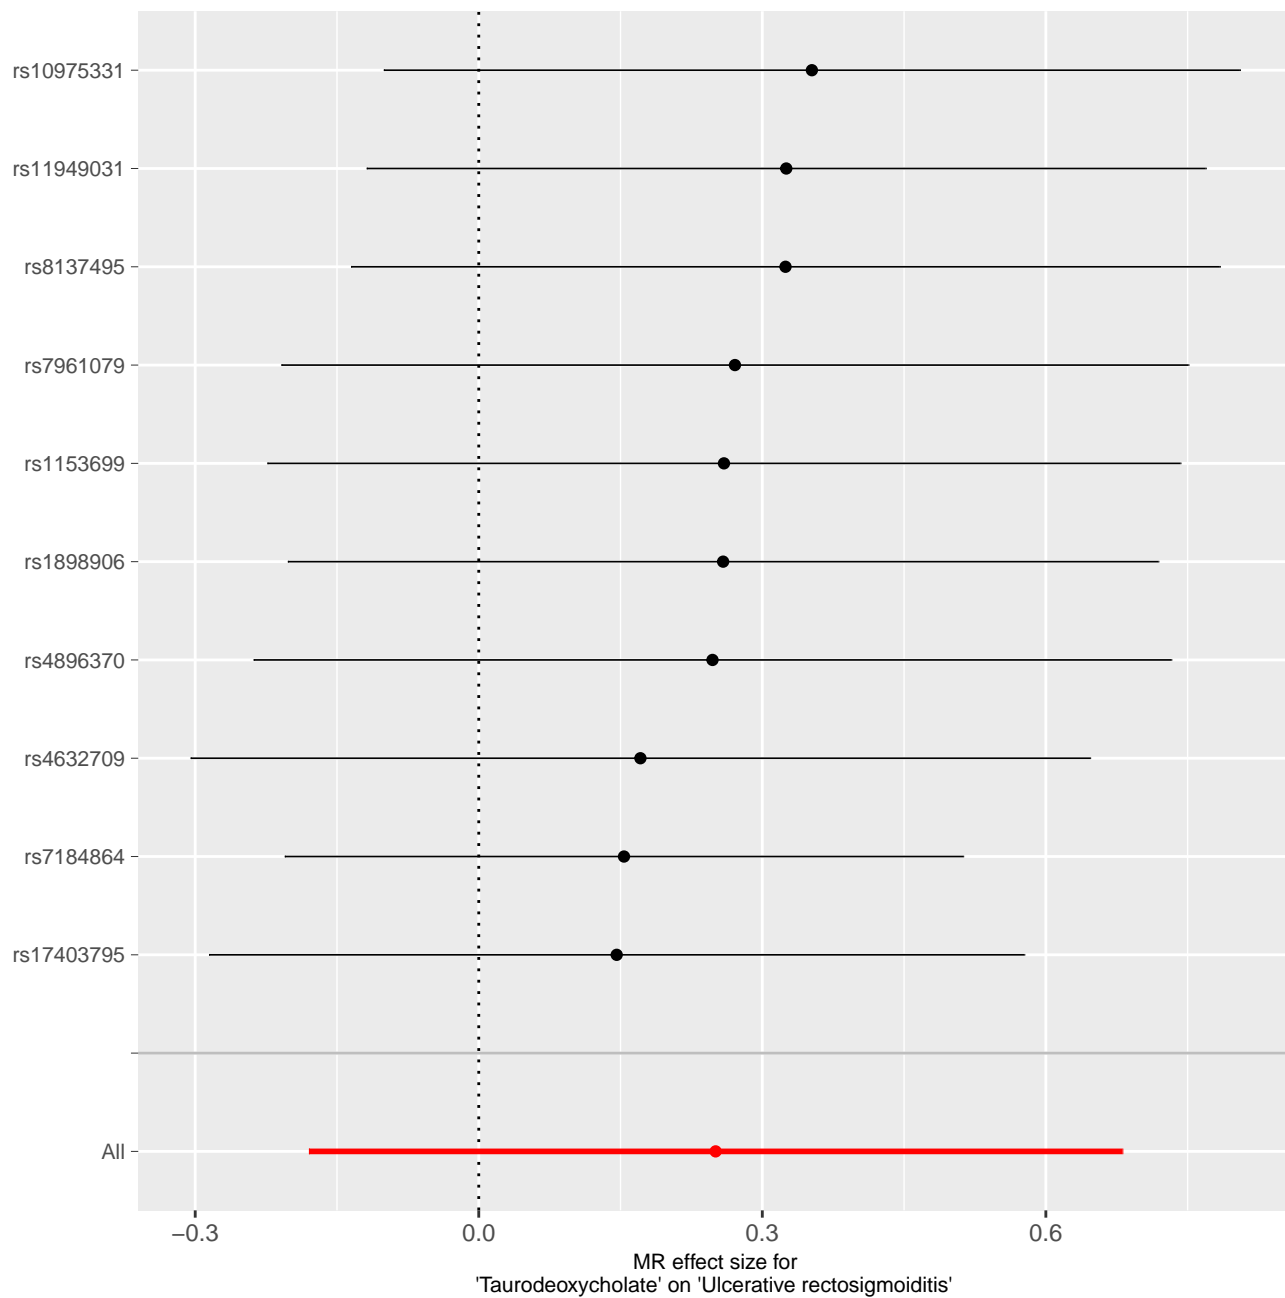

MR effect size for  
'Taurodeoxycholate' on 'Ulcerative rectosigmoiditis'



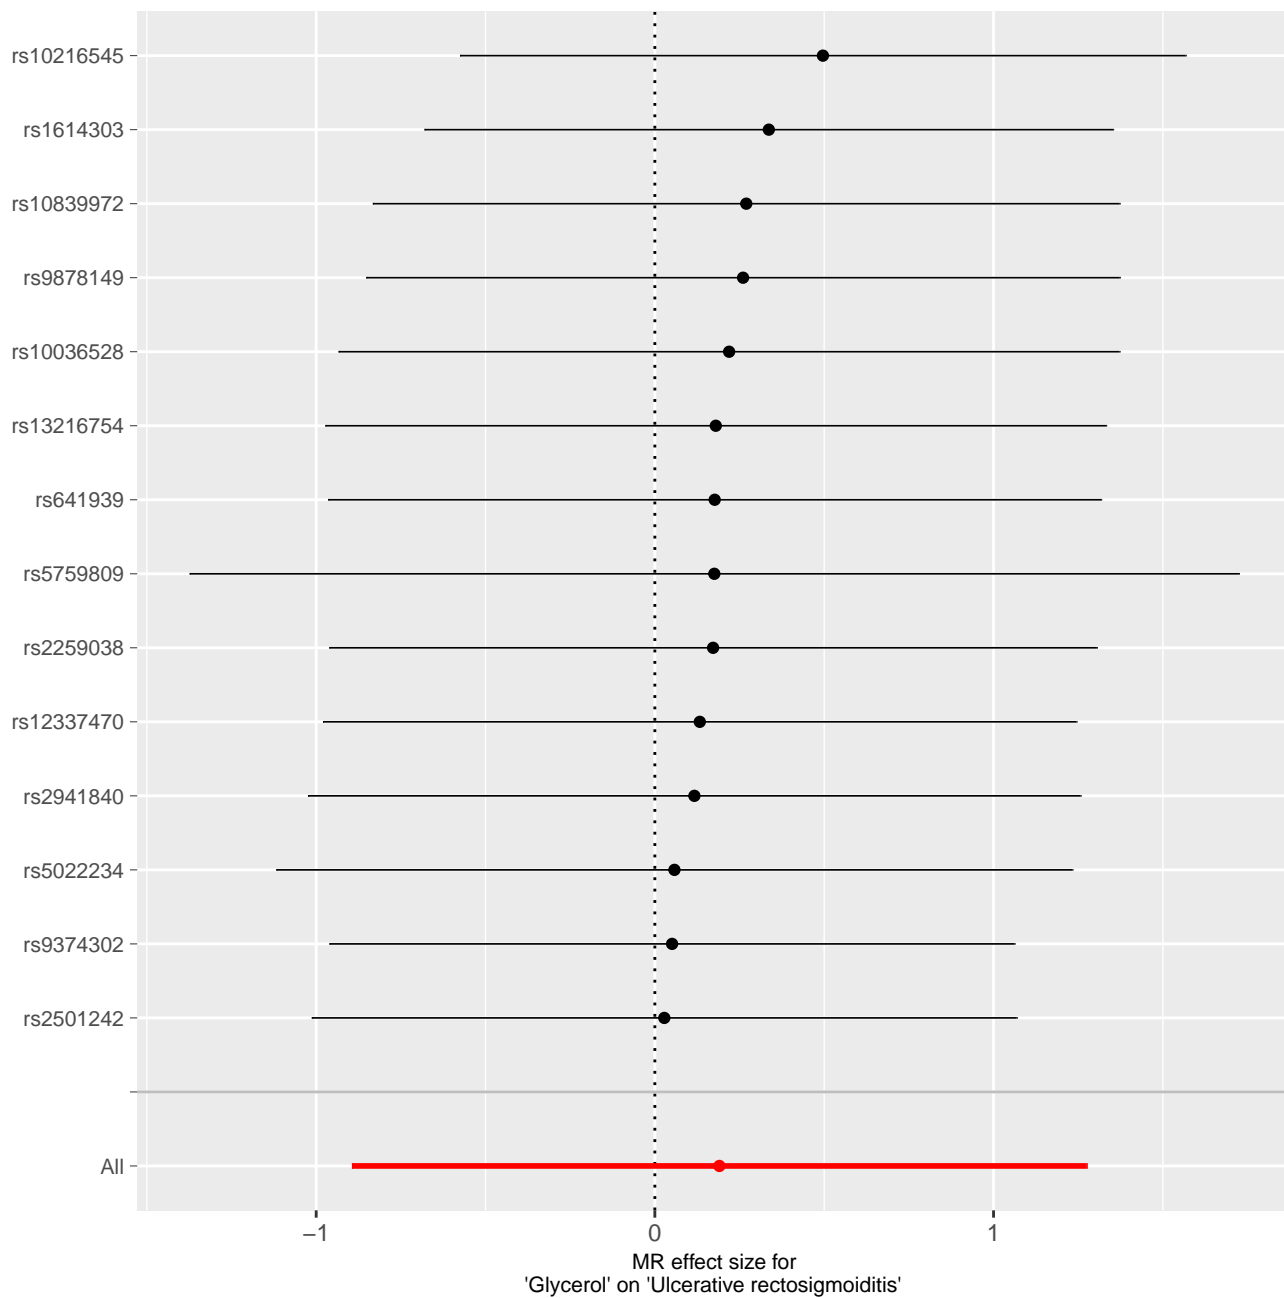

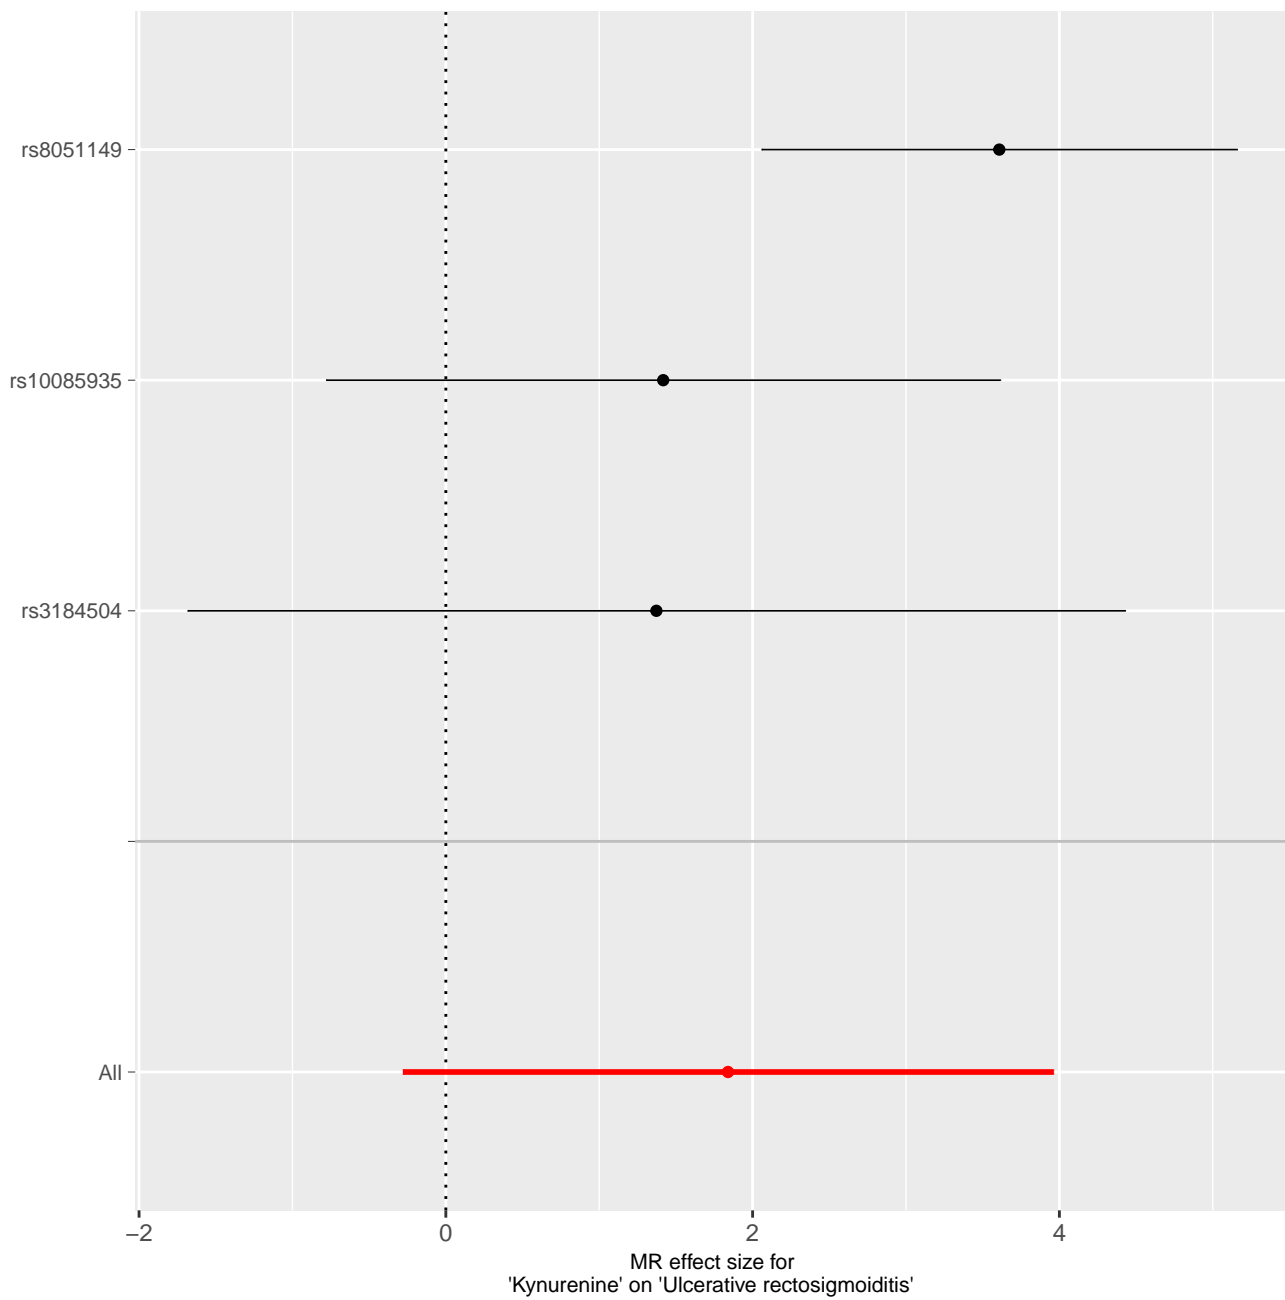

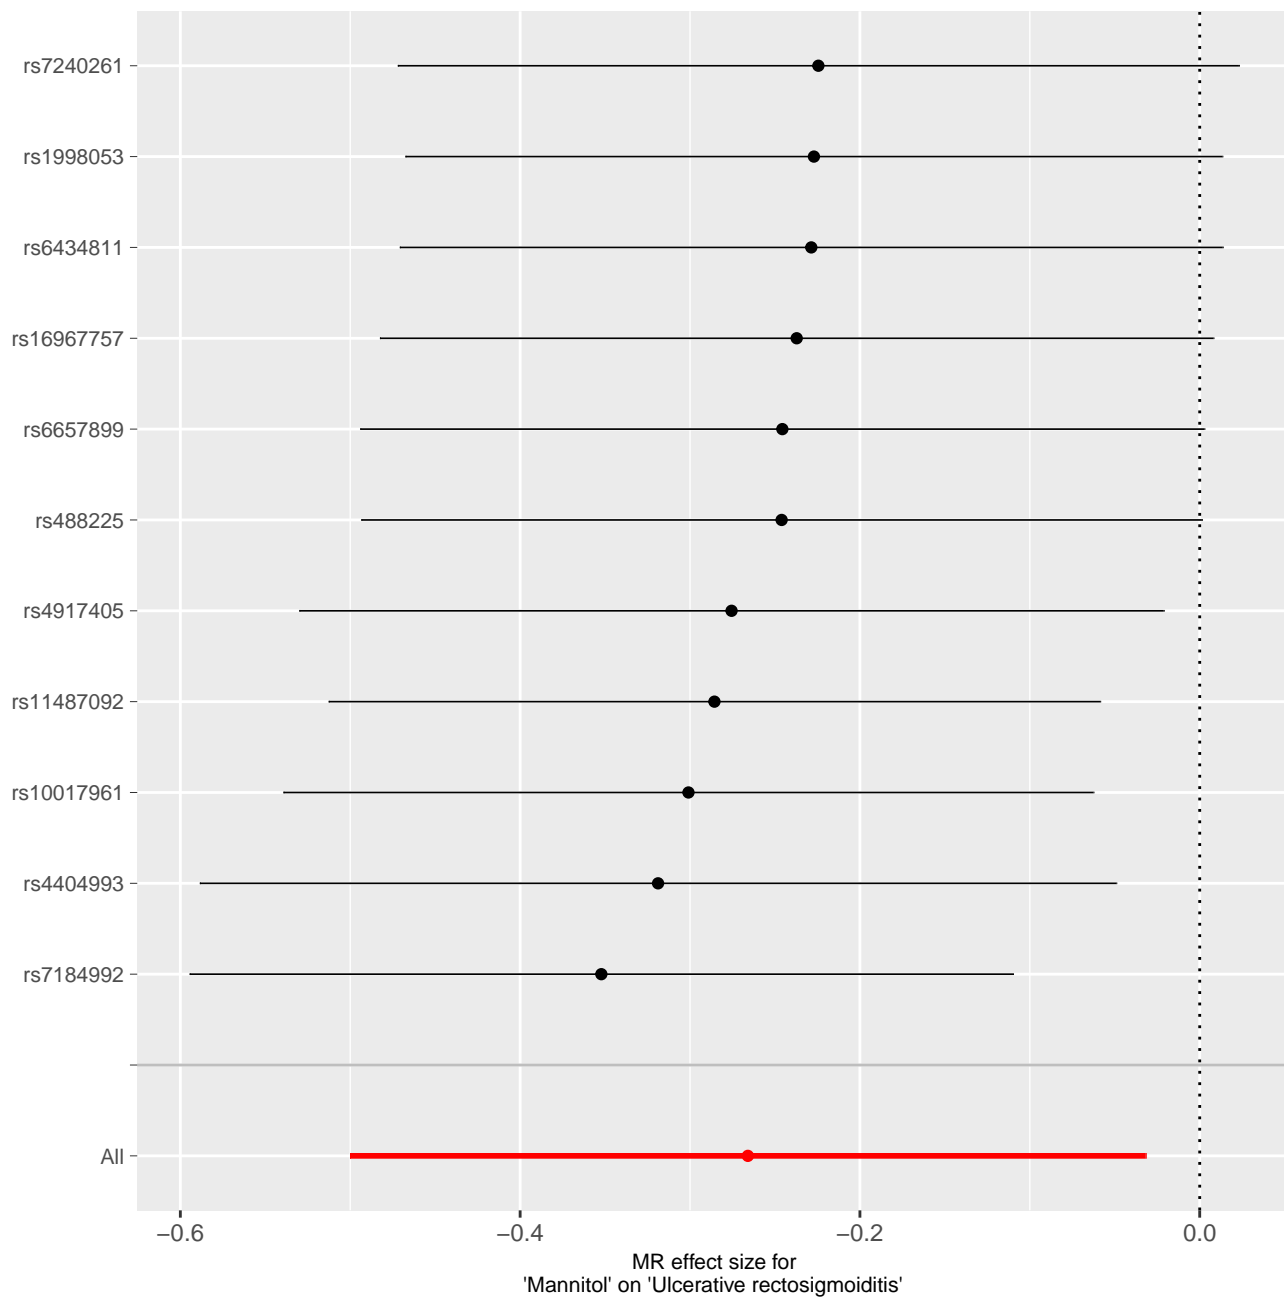

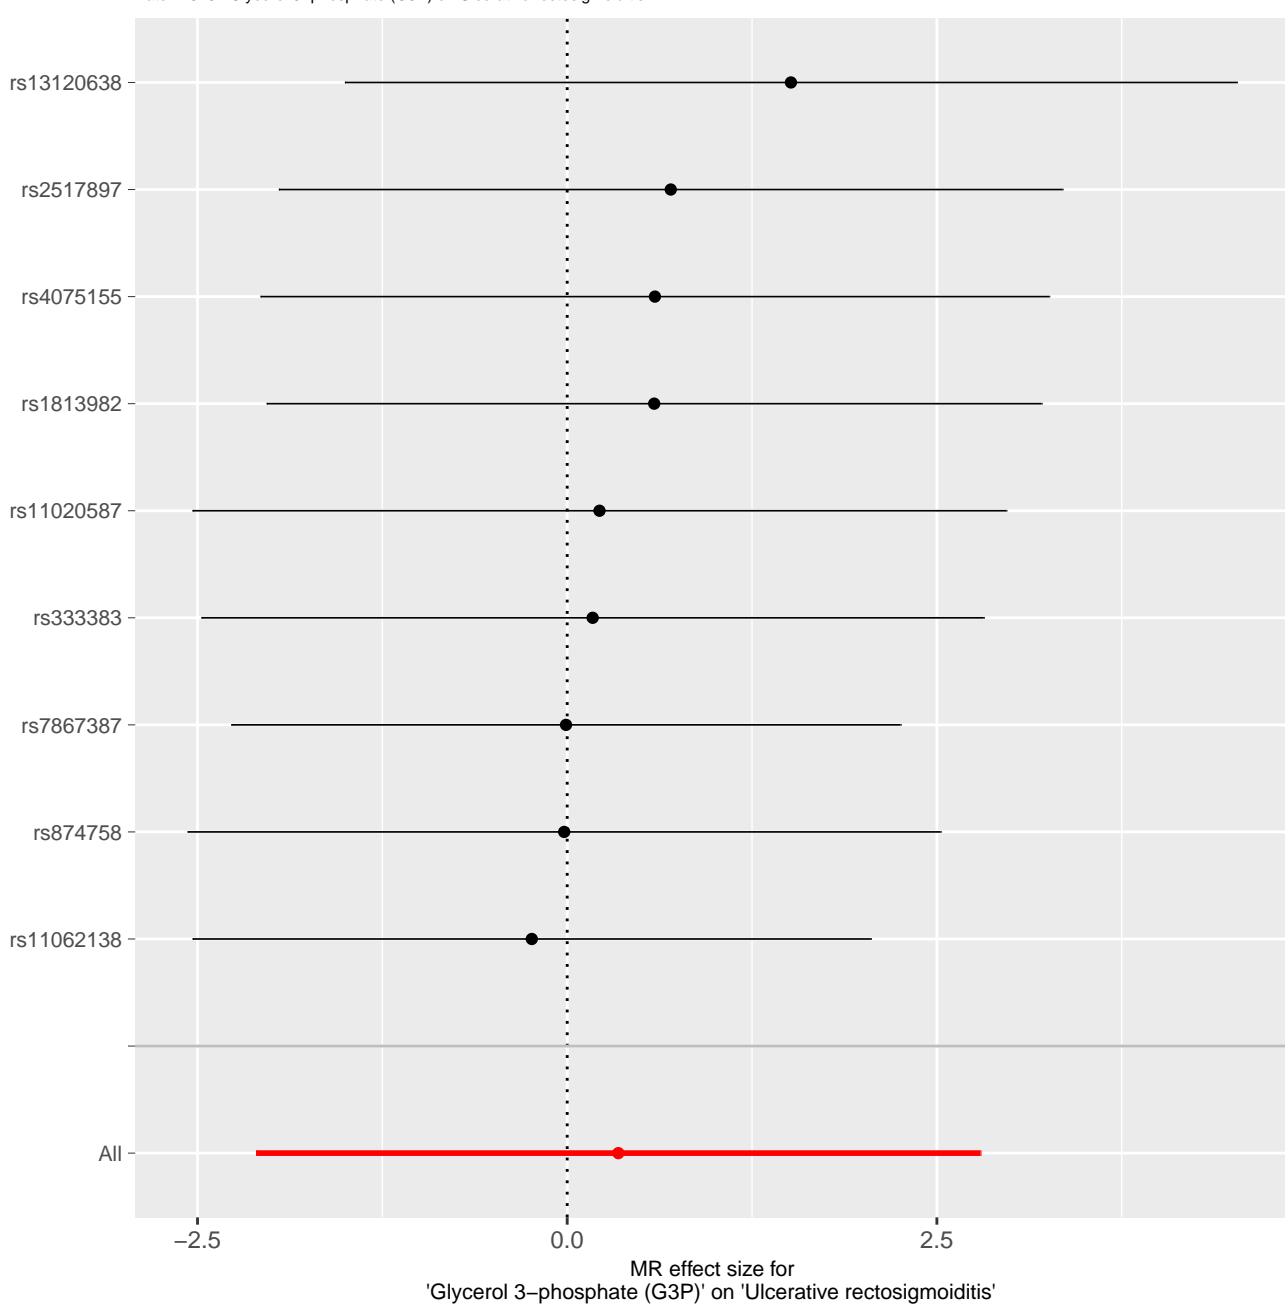

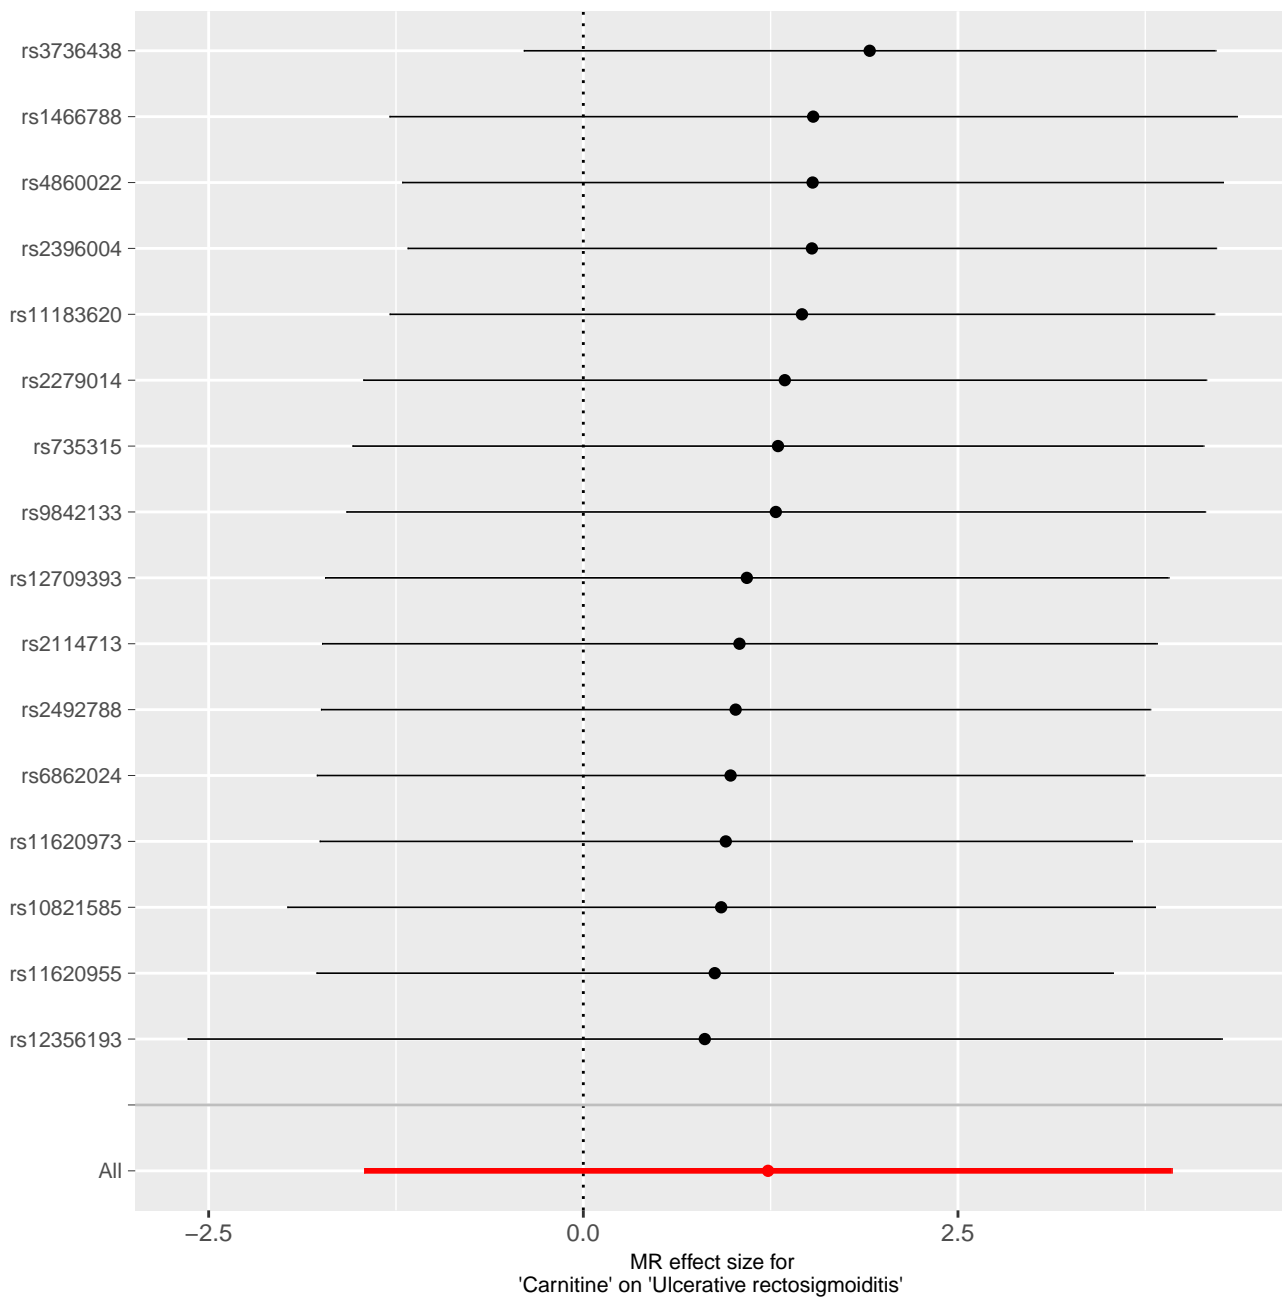

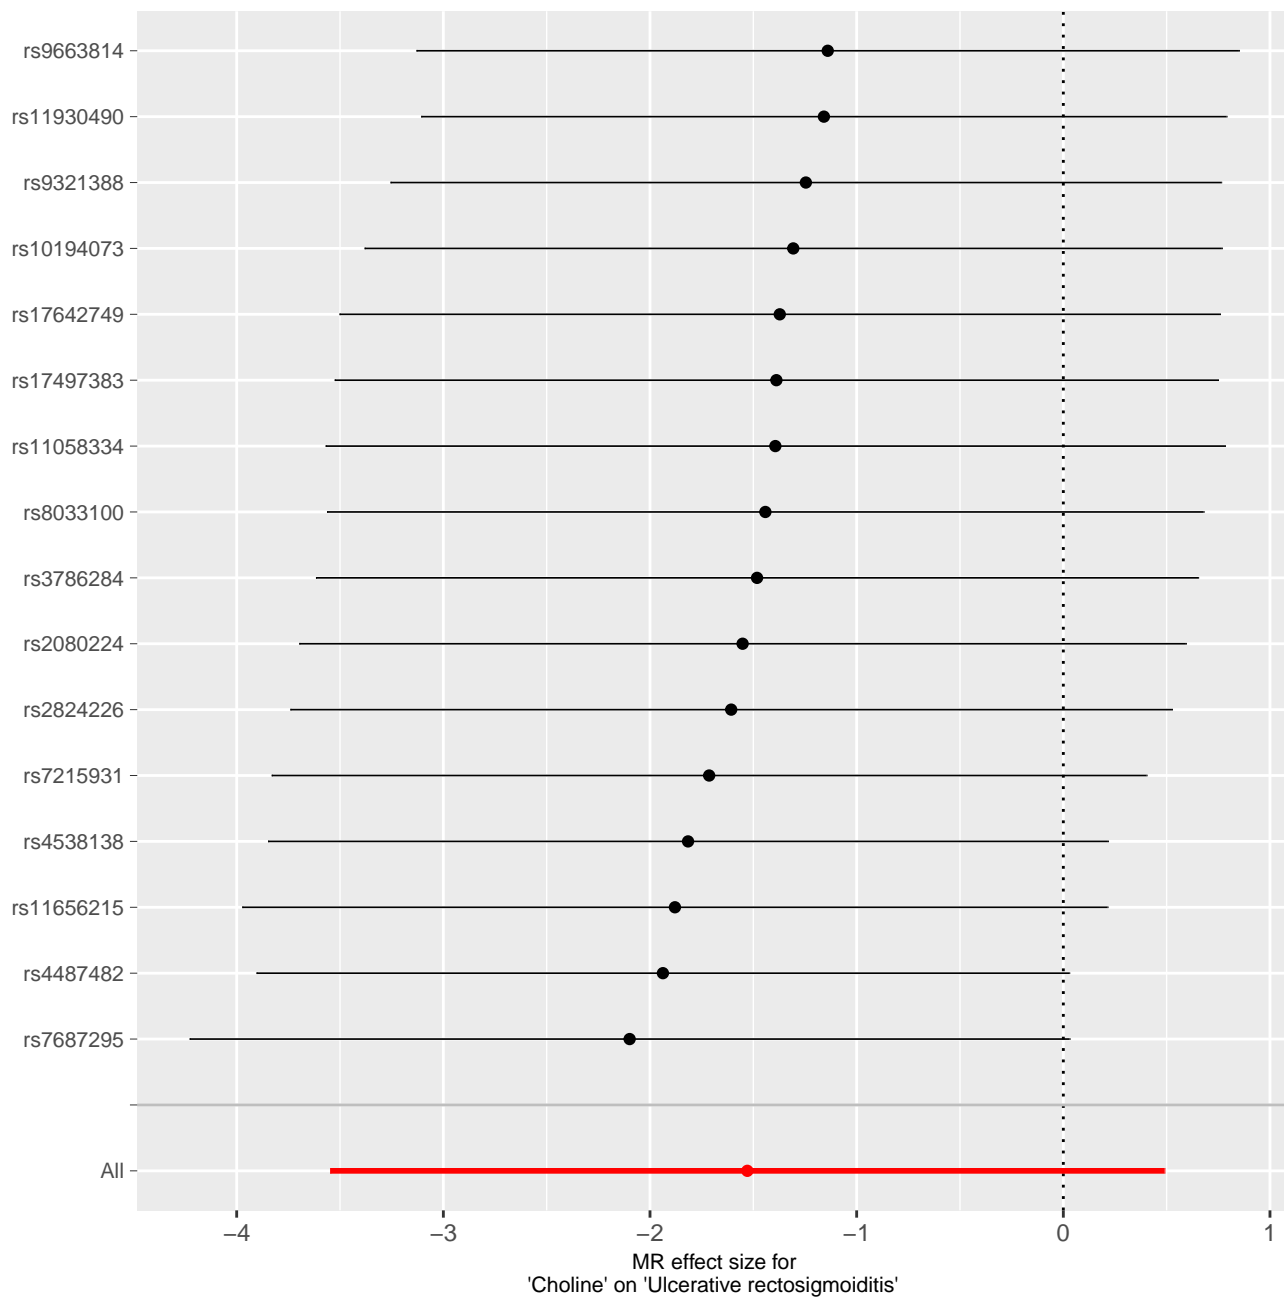

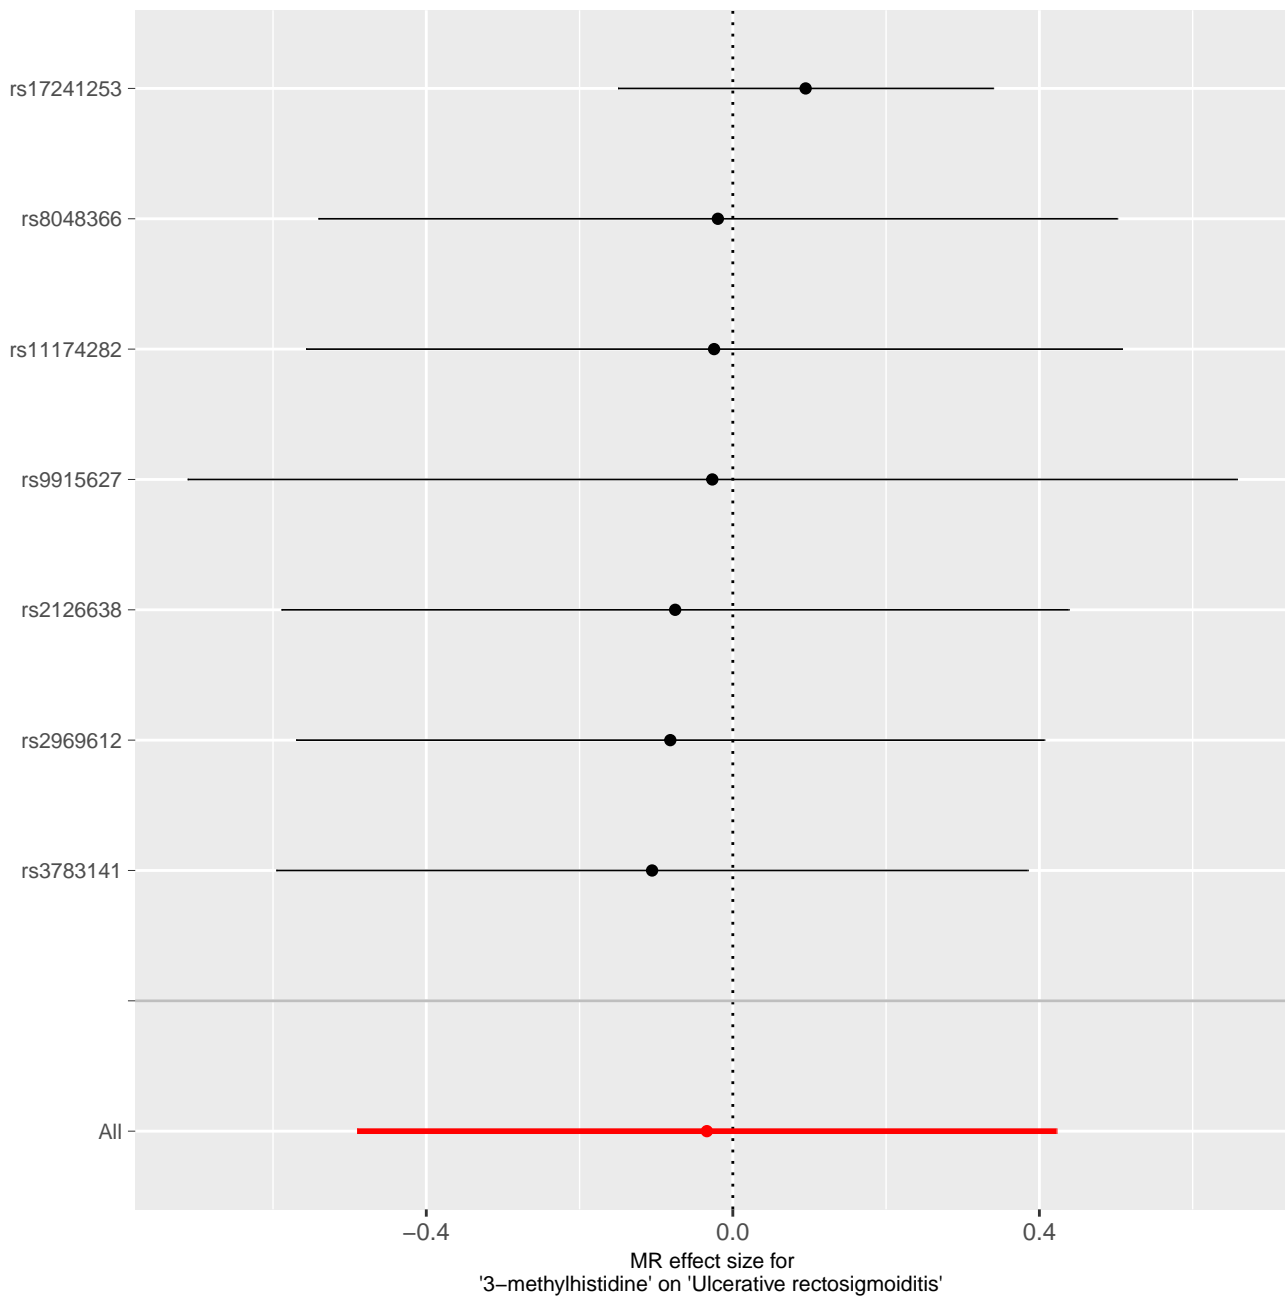

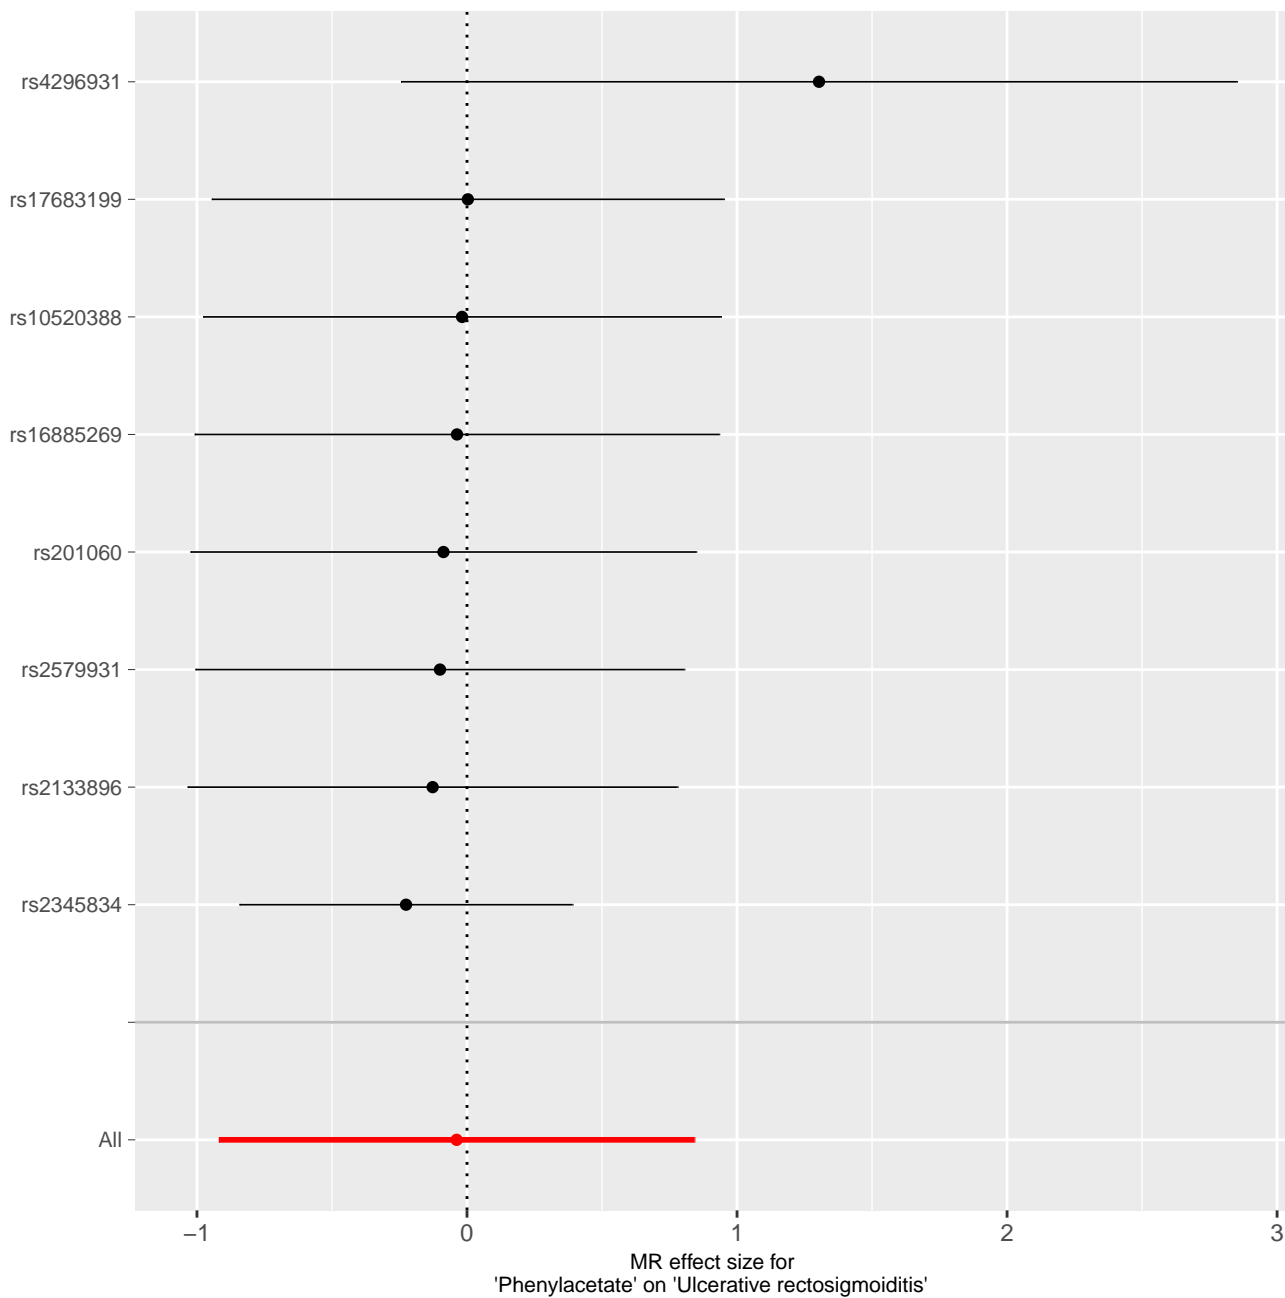



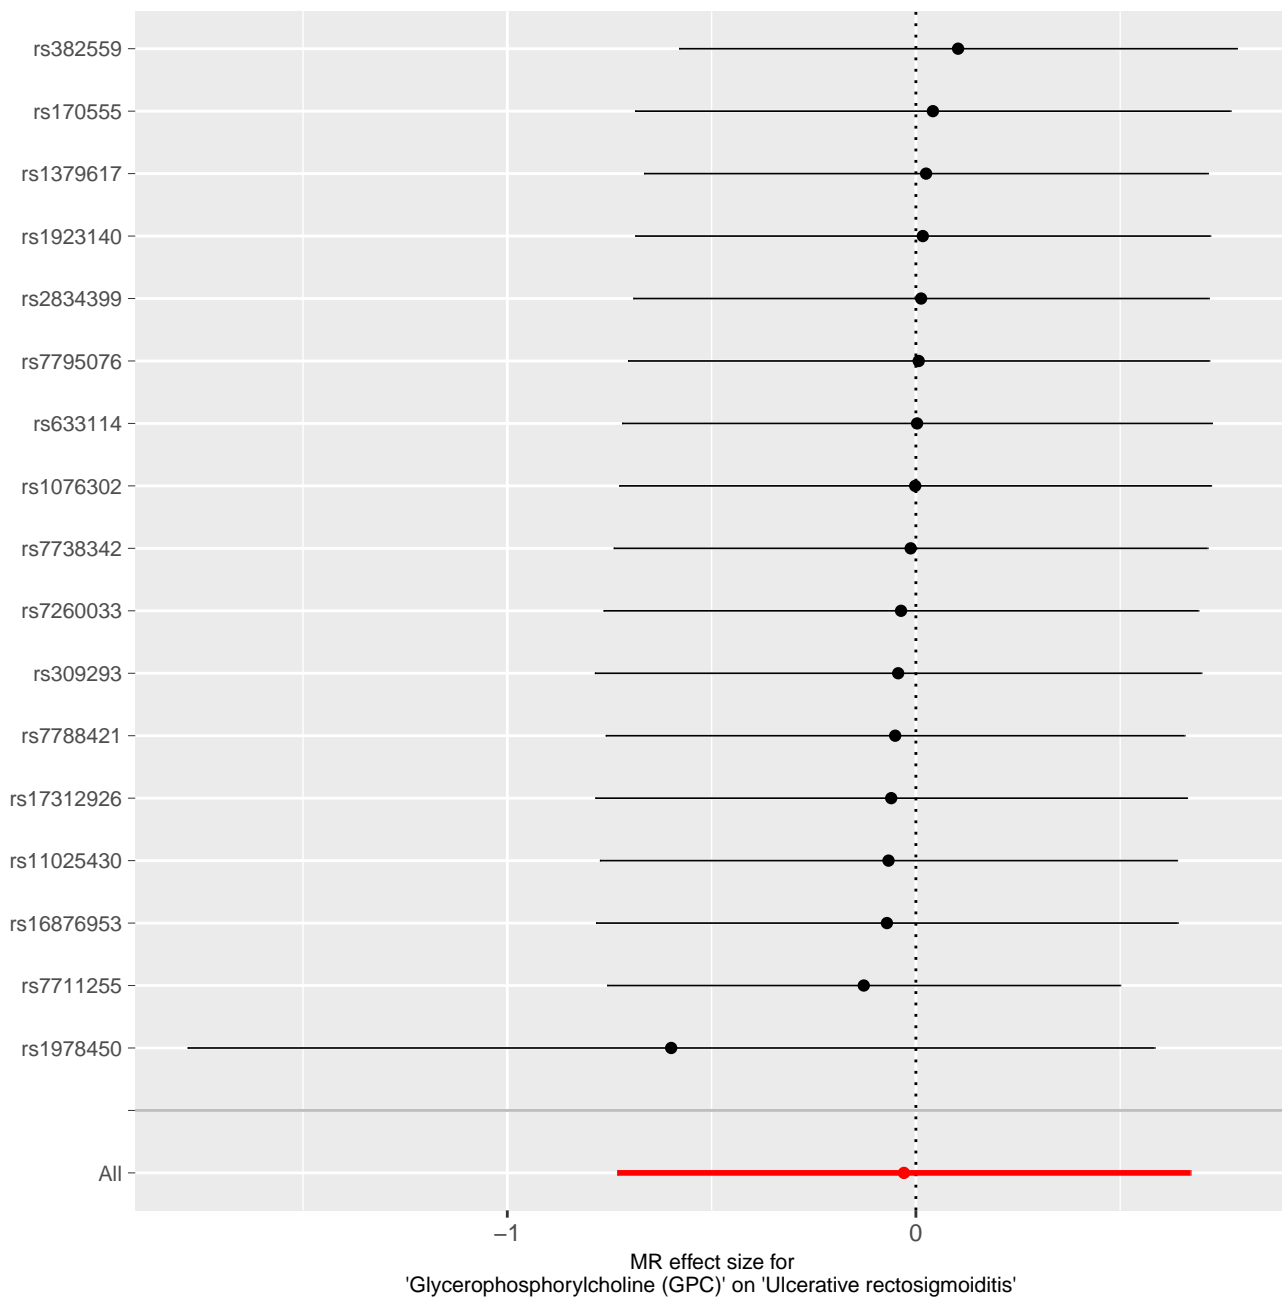

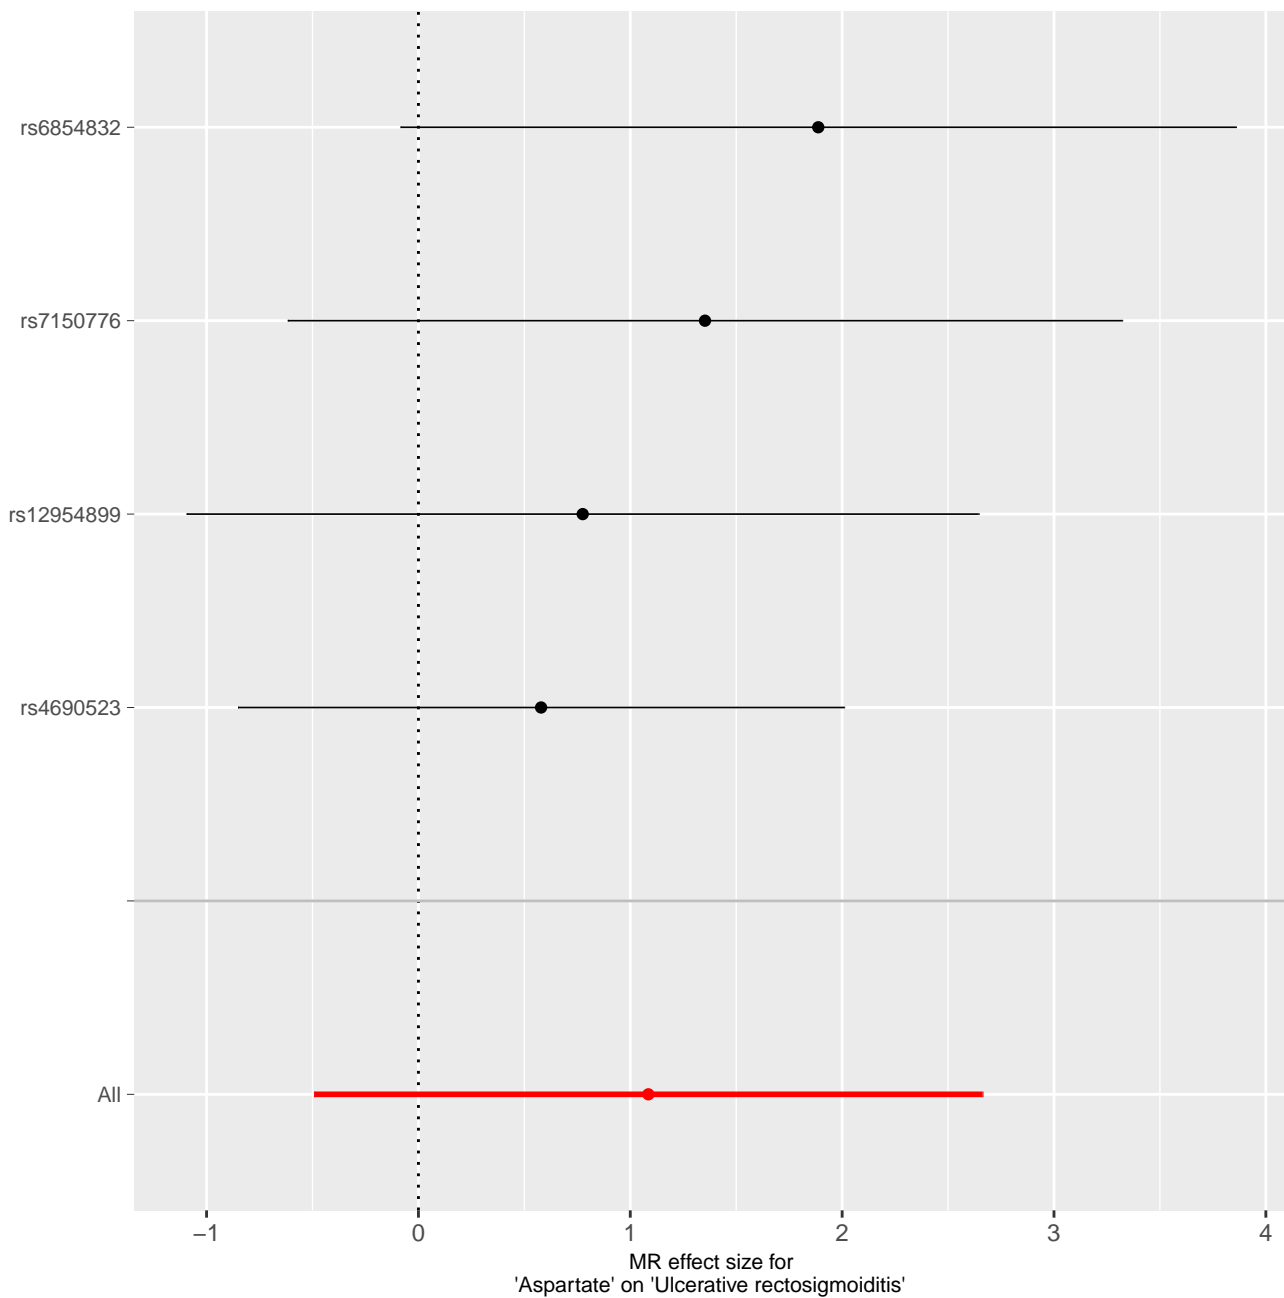

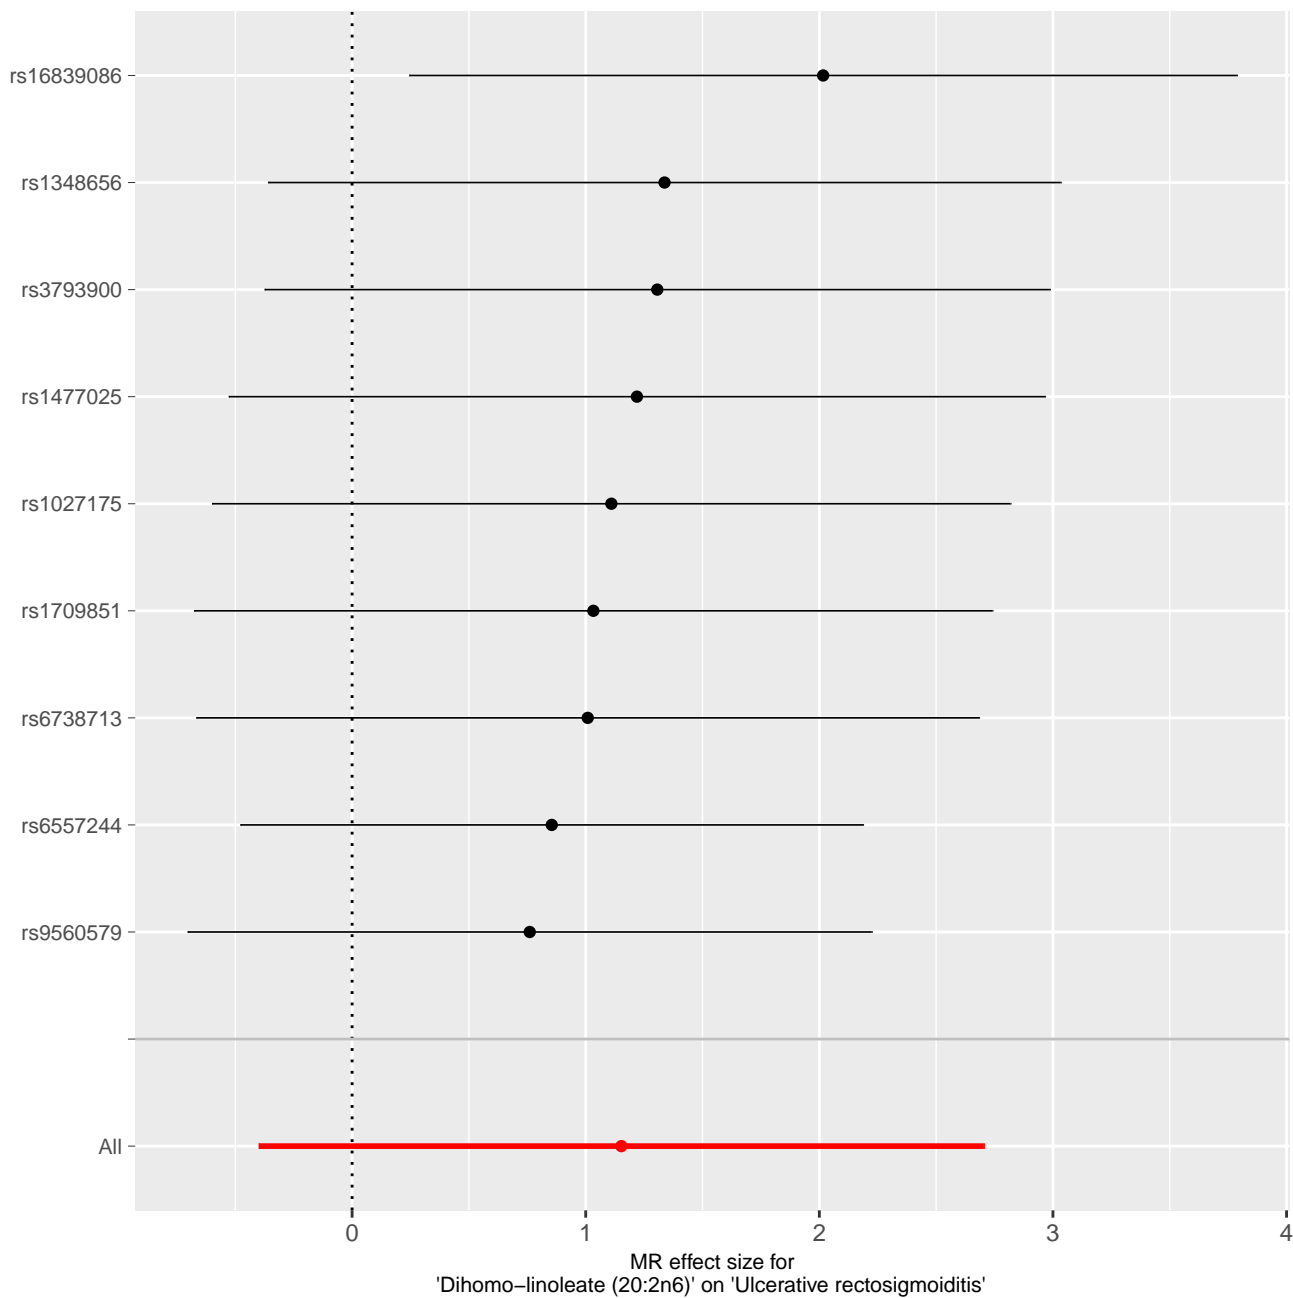

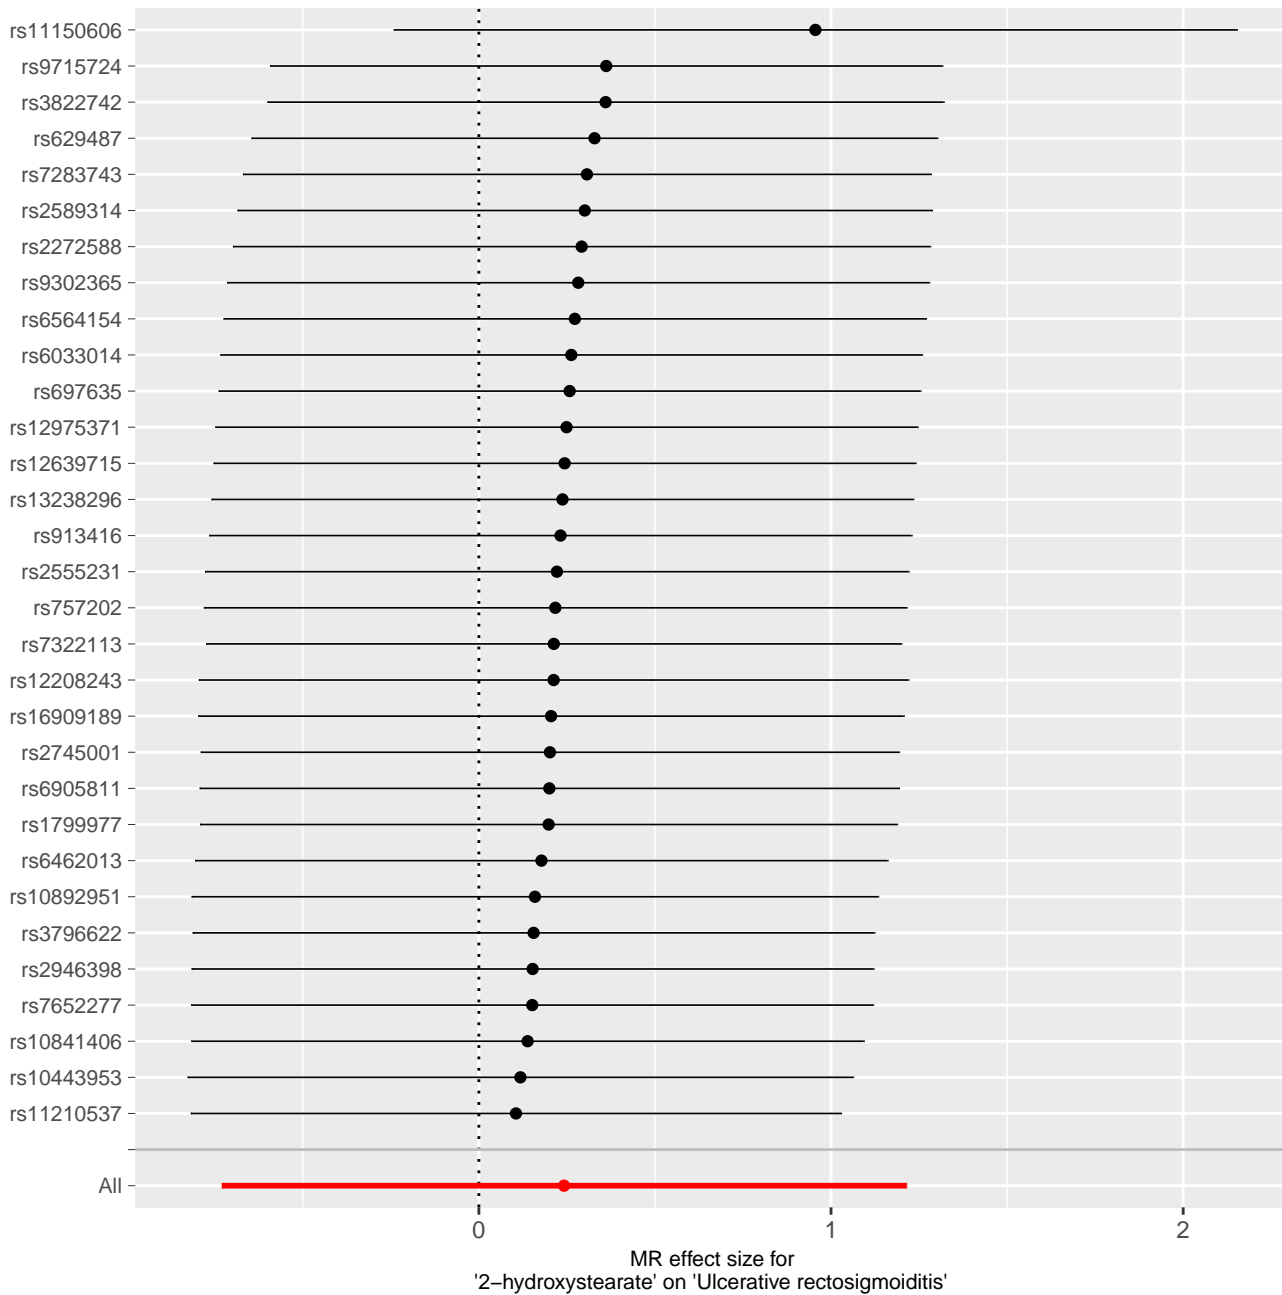

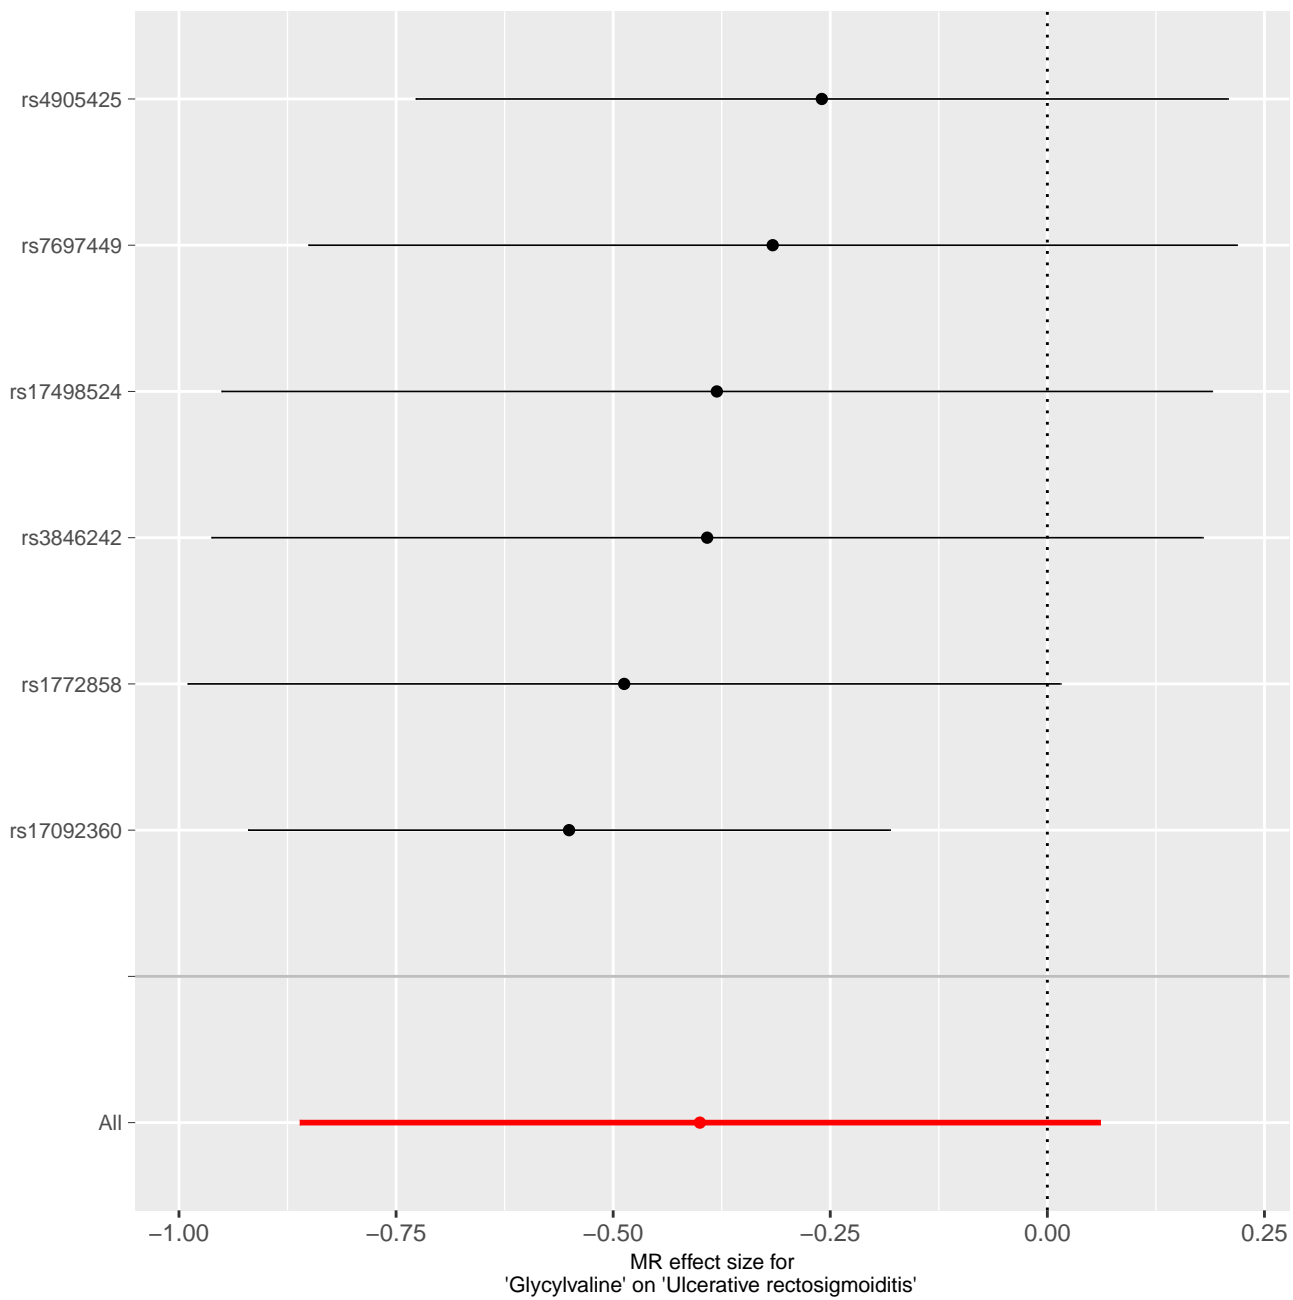

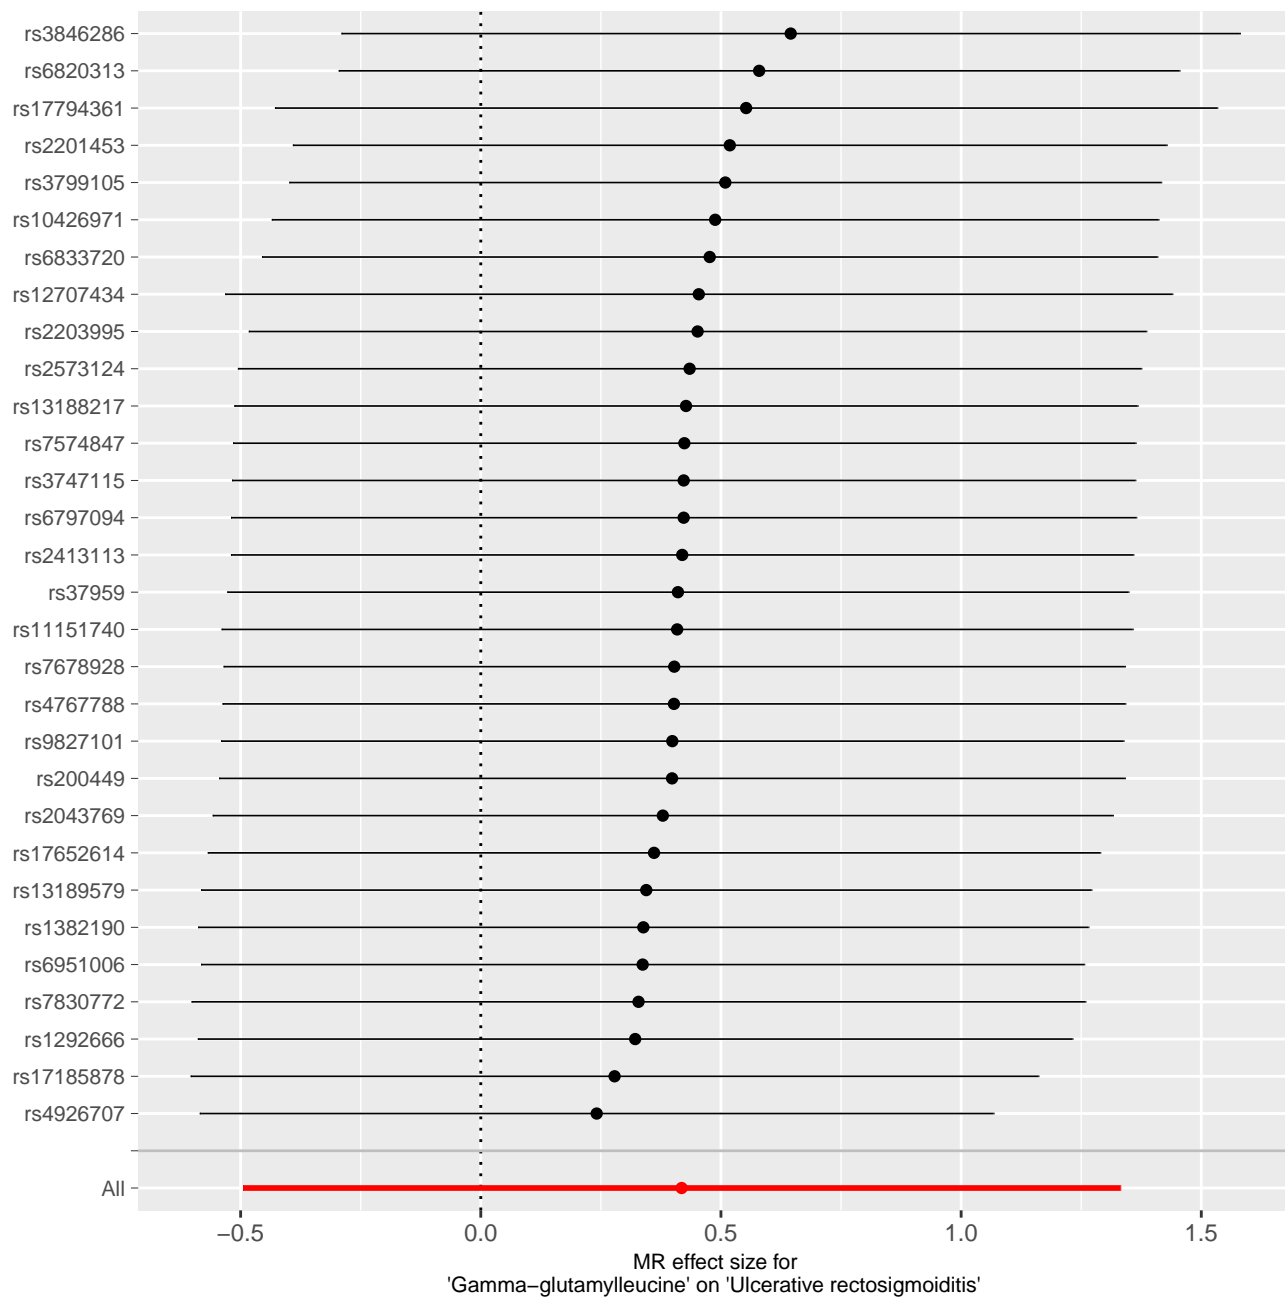

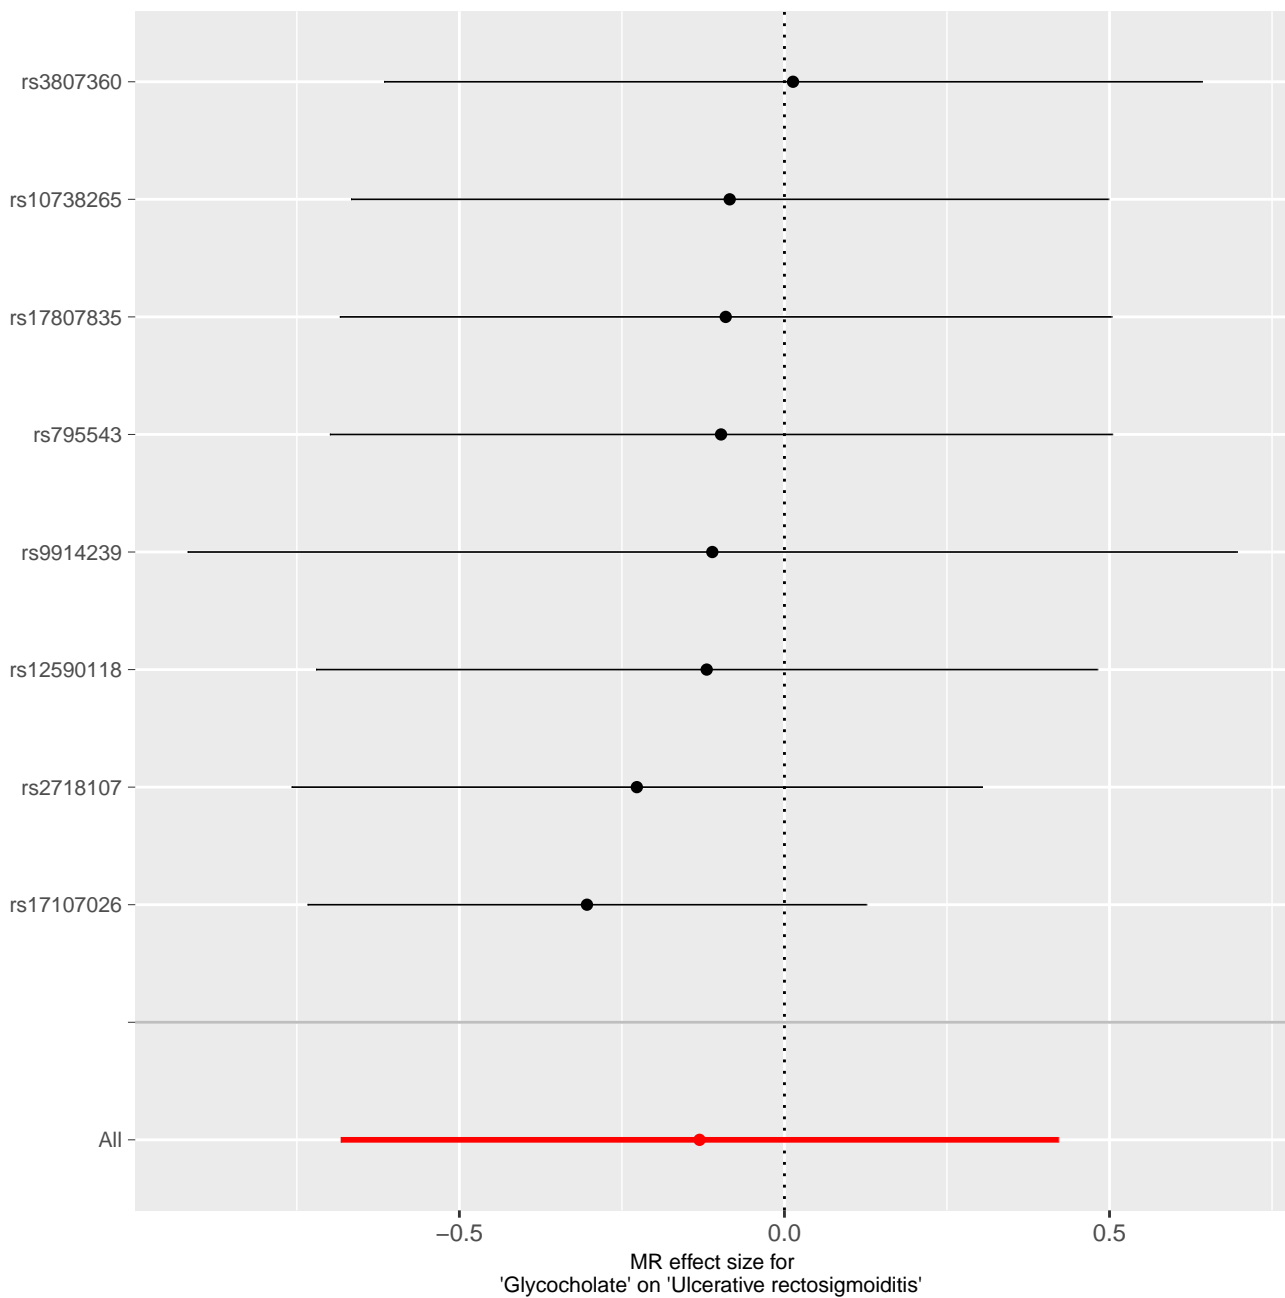

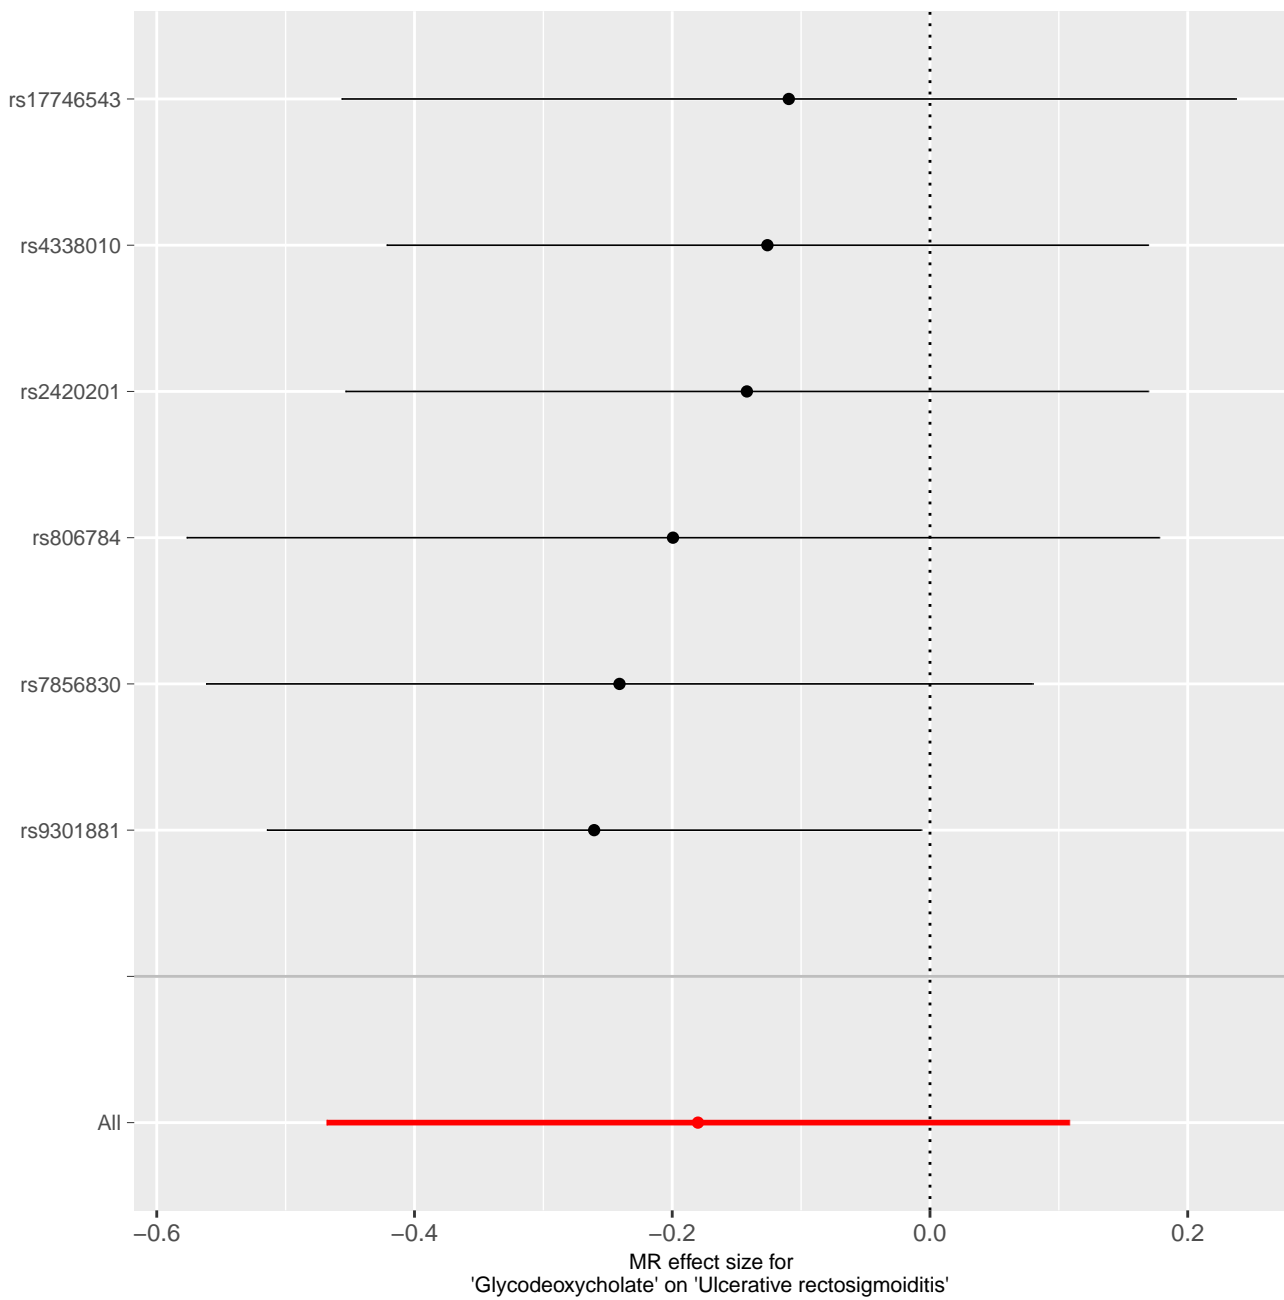



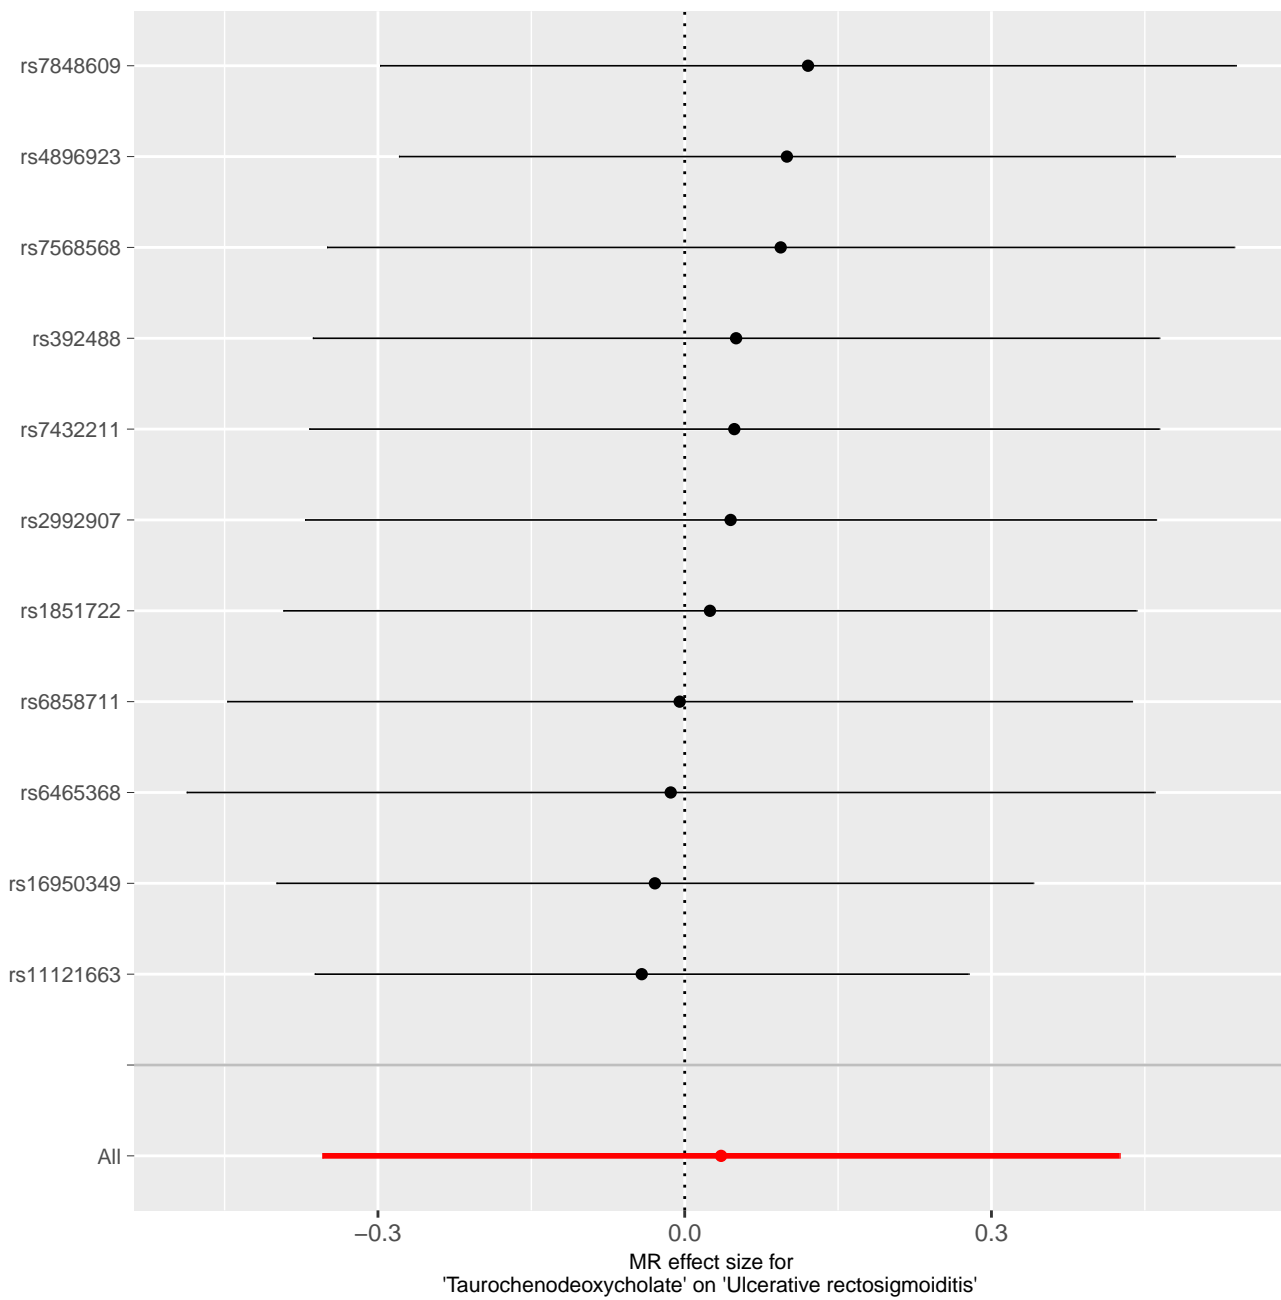

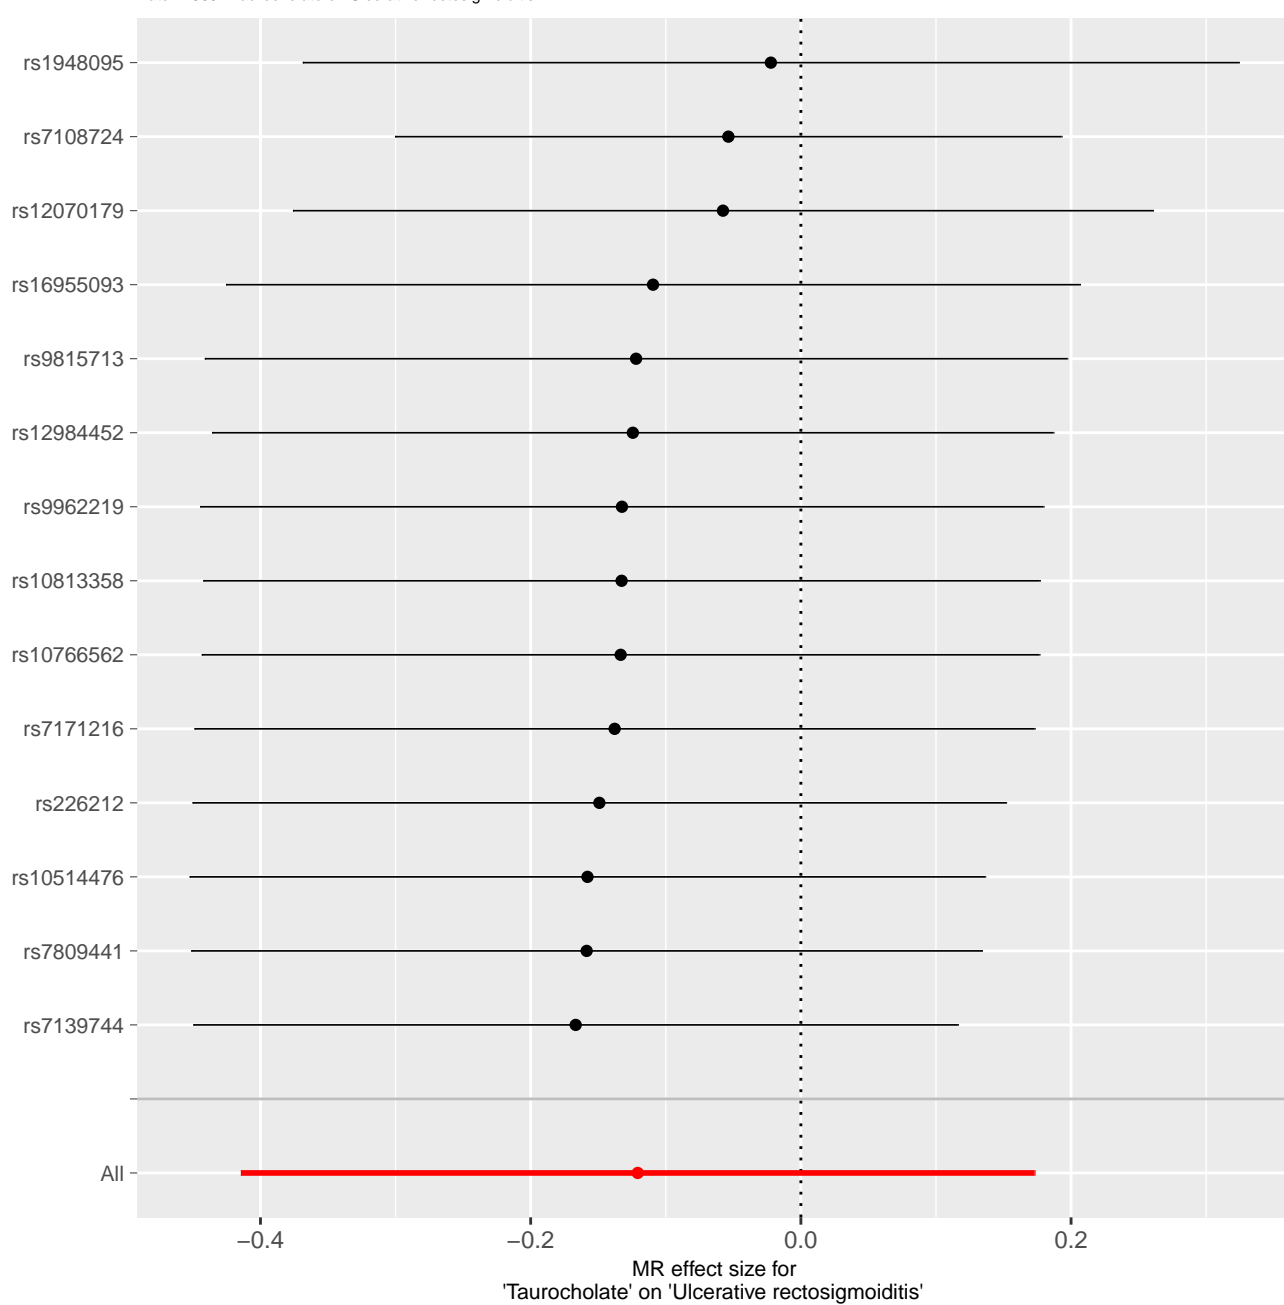

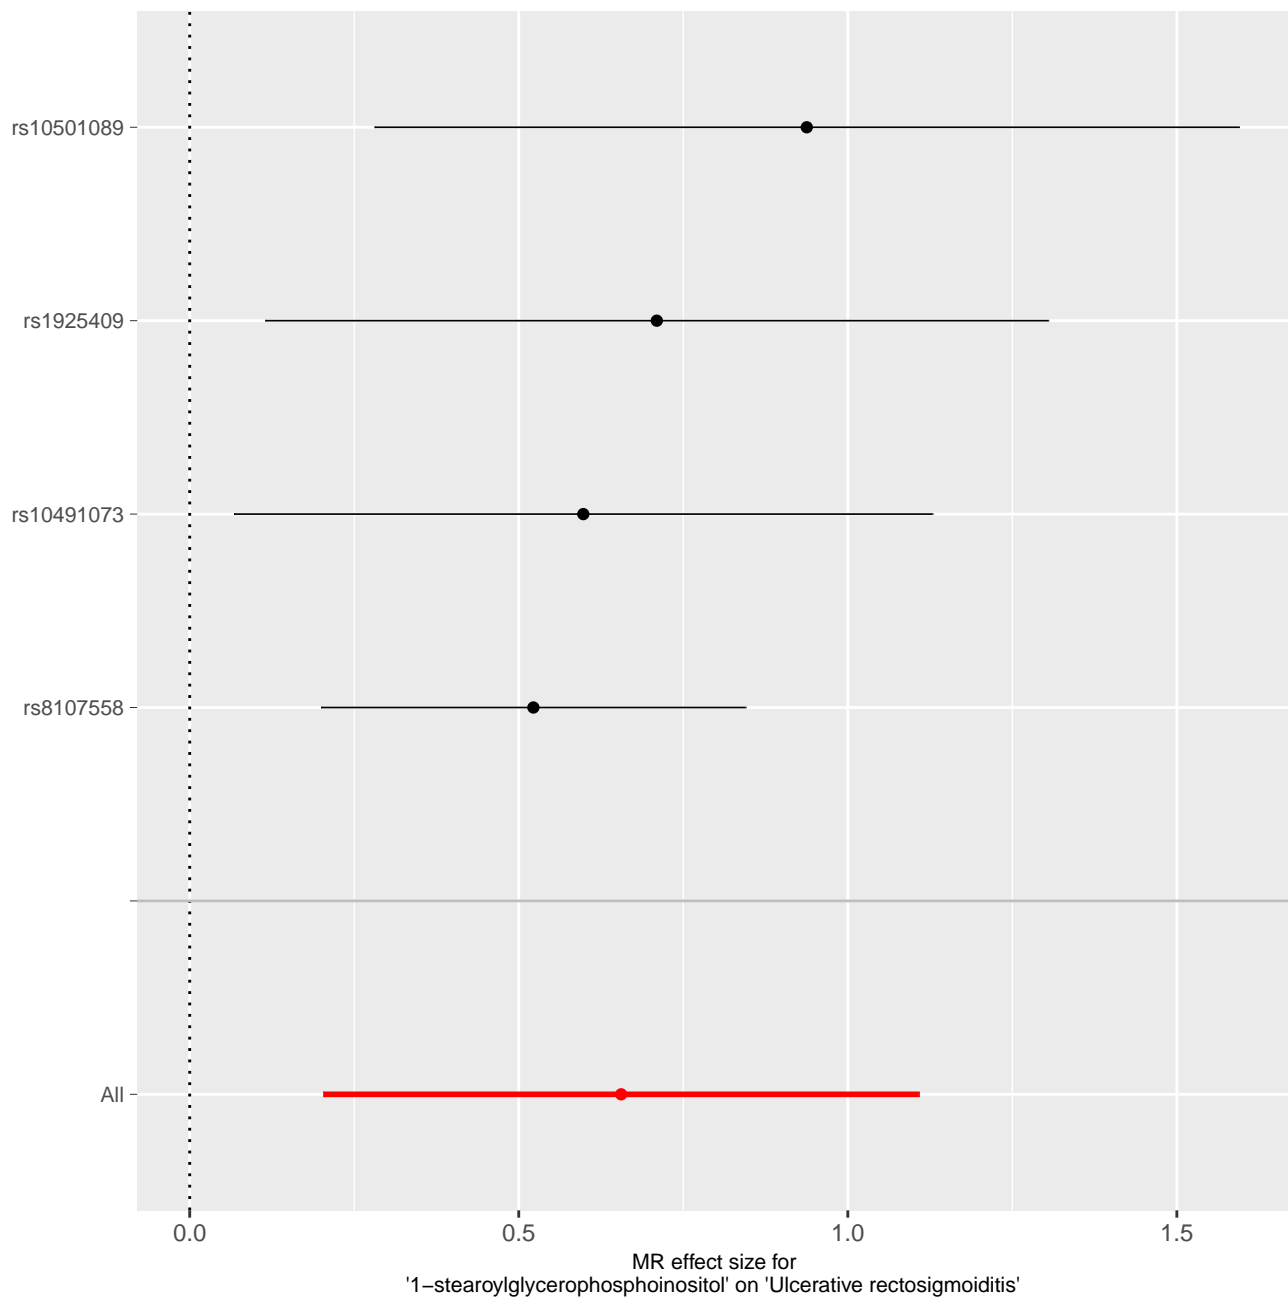

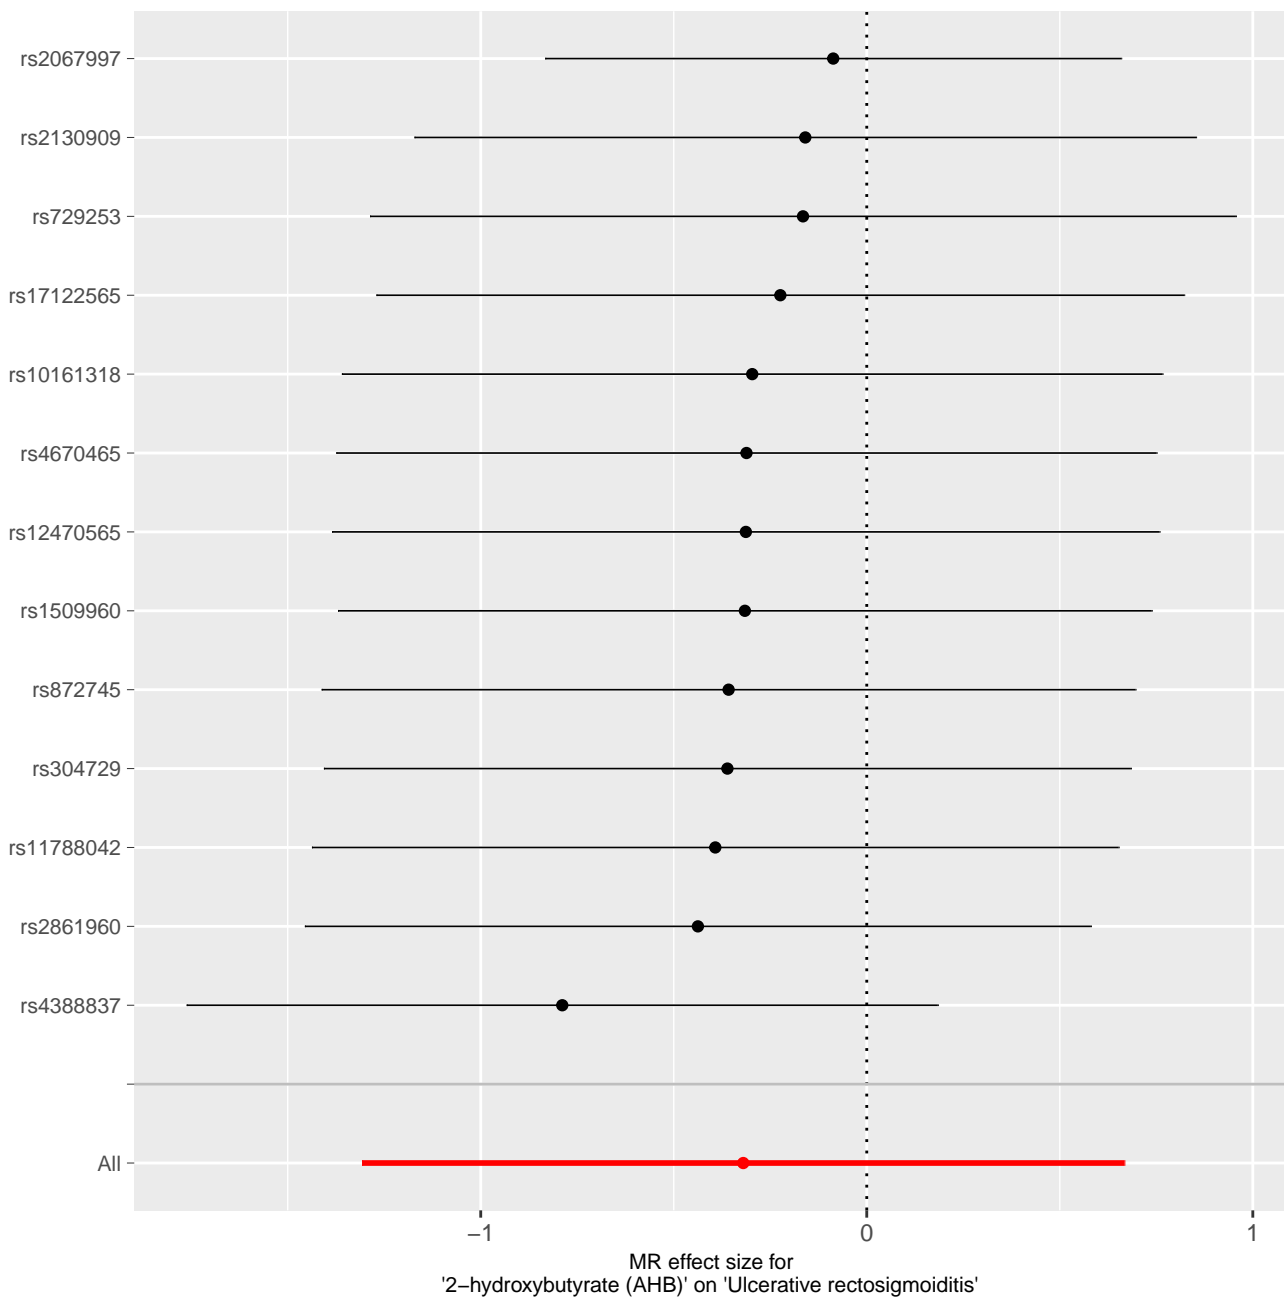

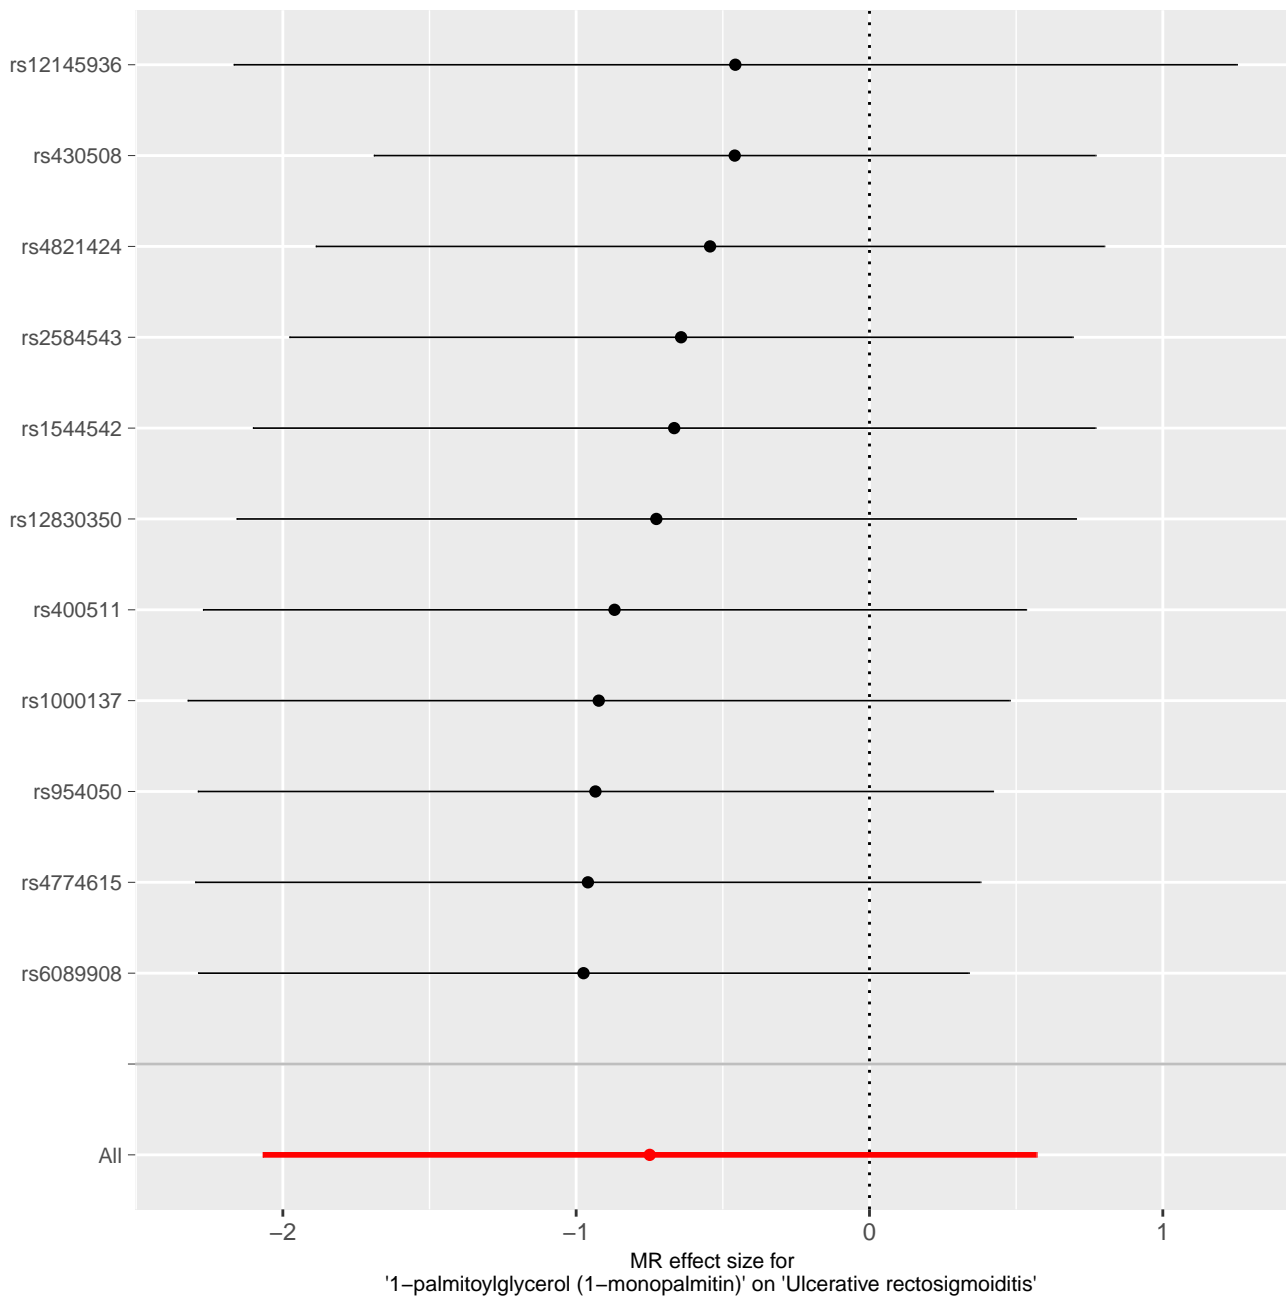

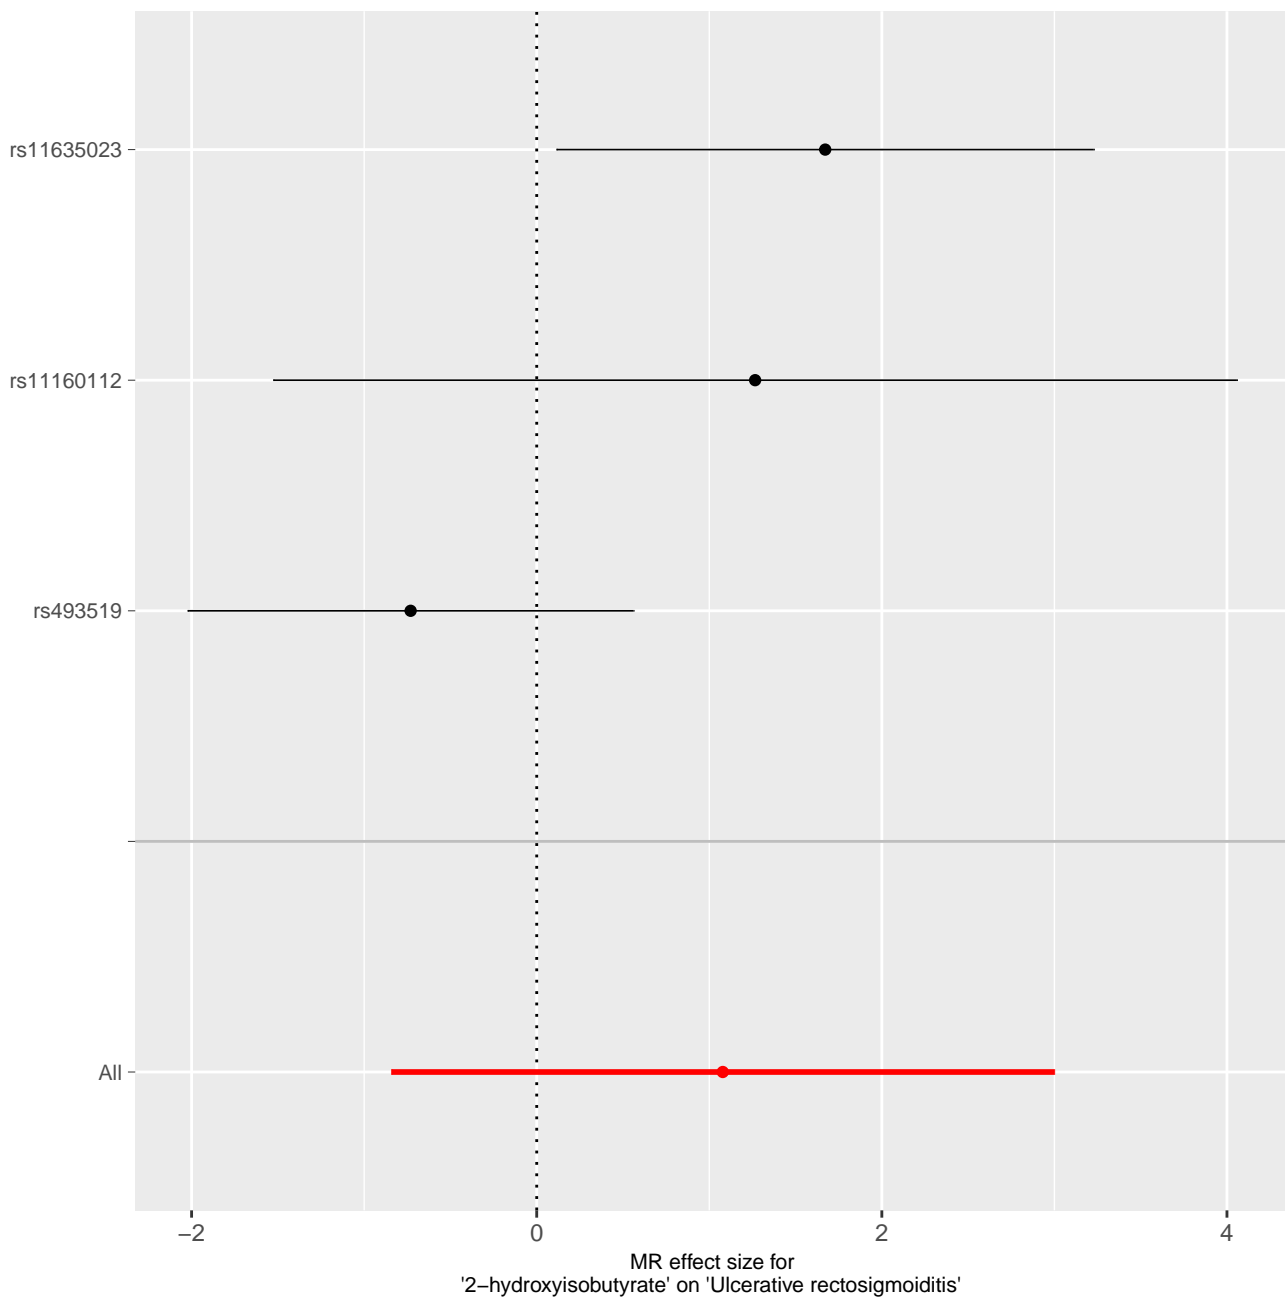

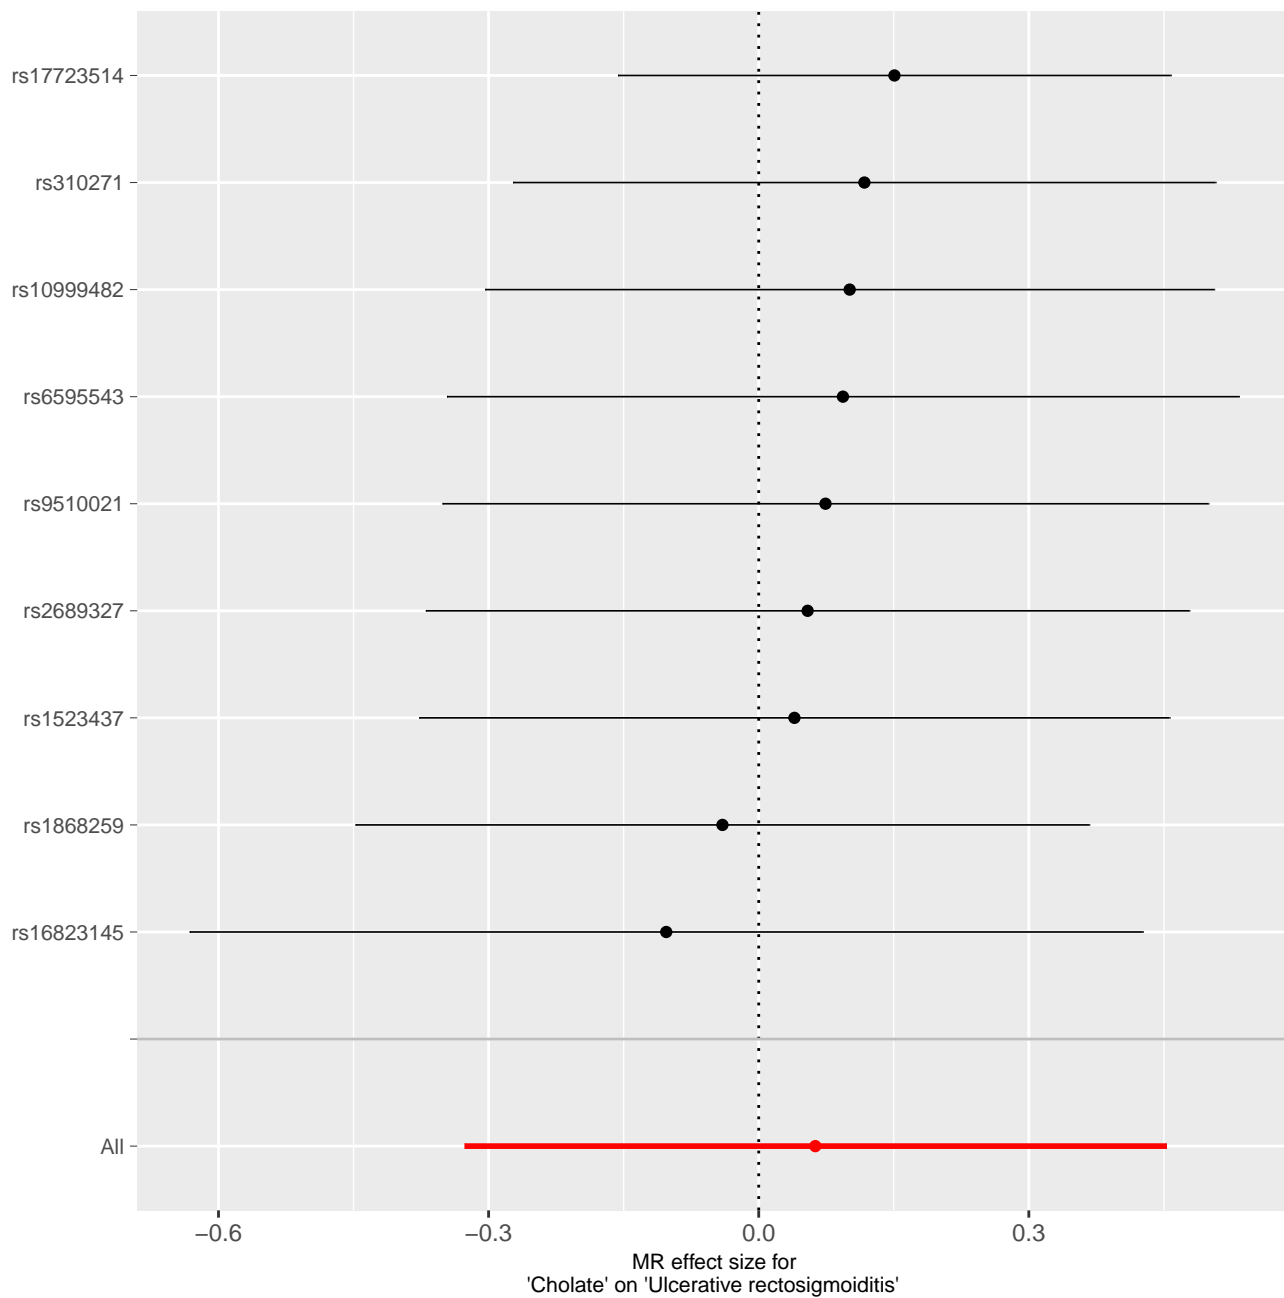

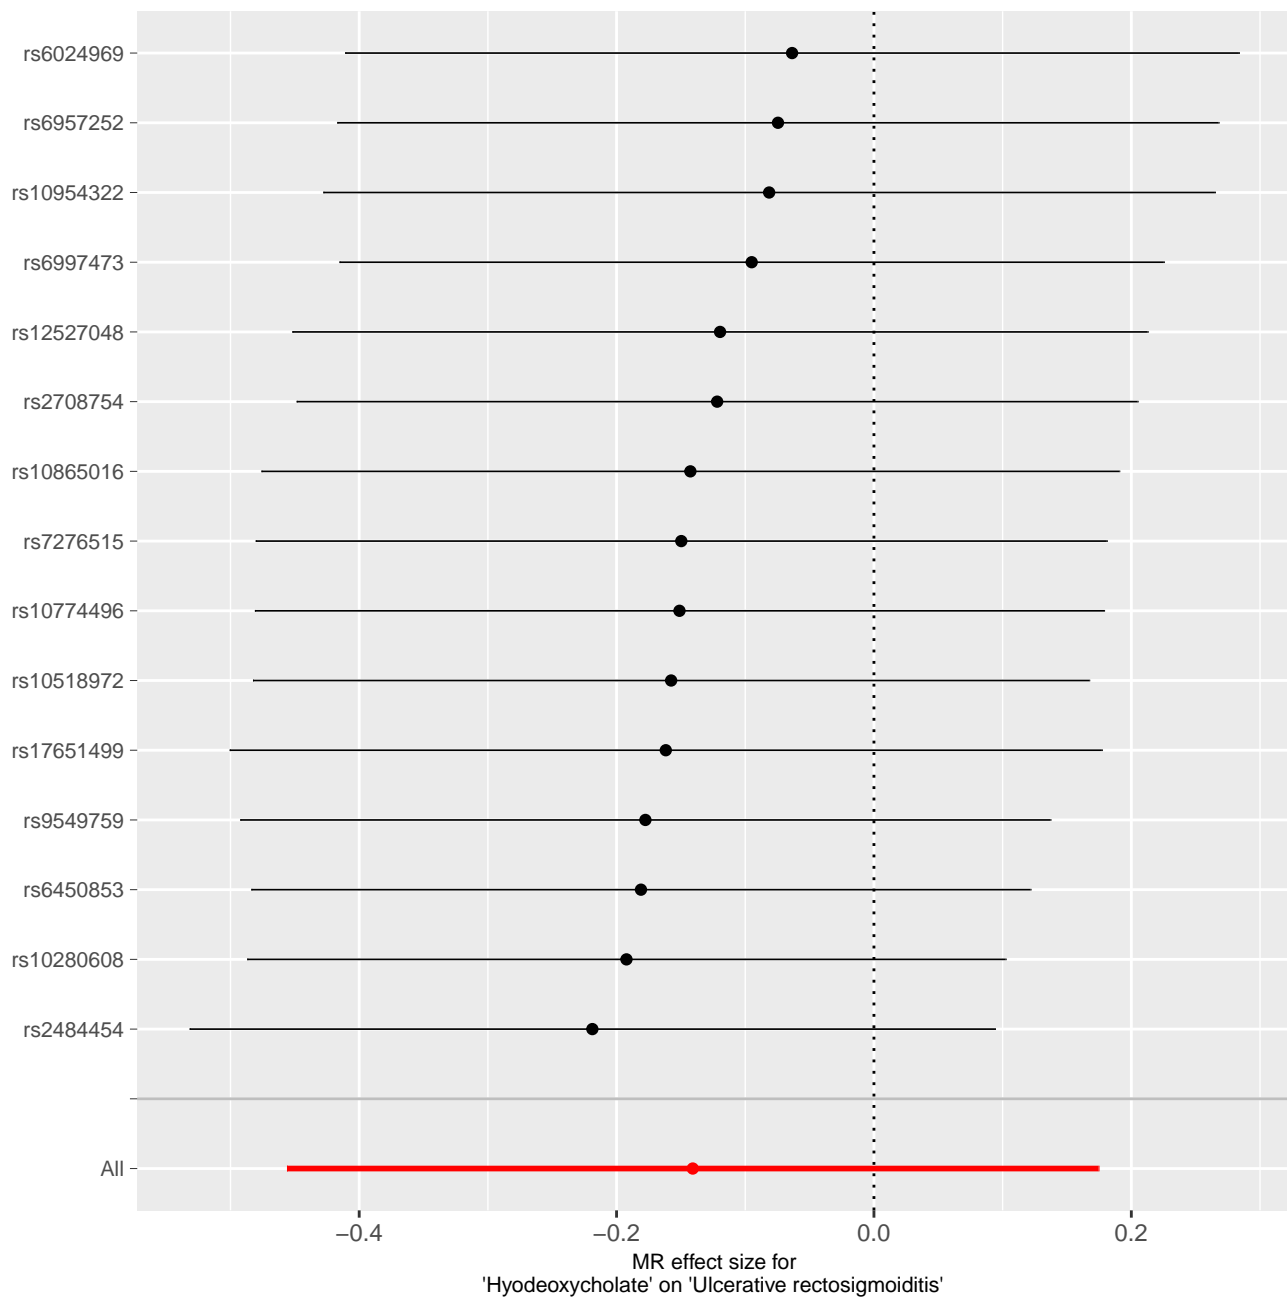



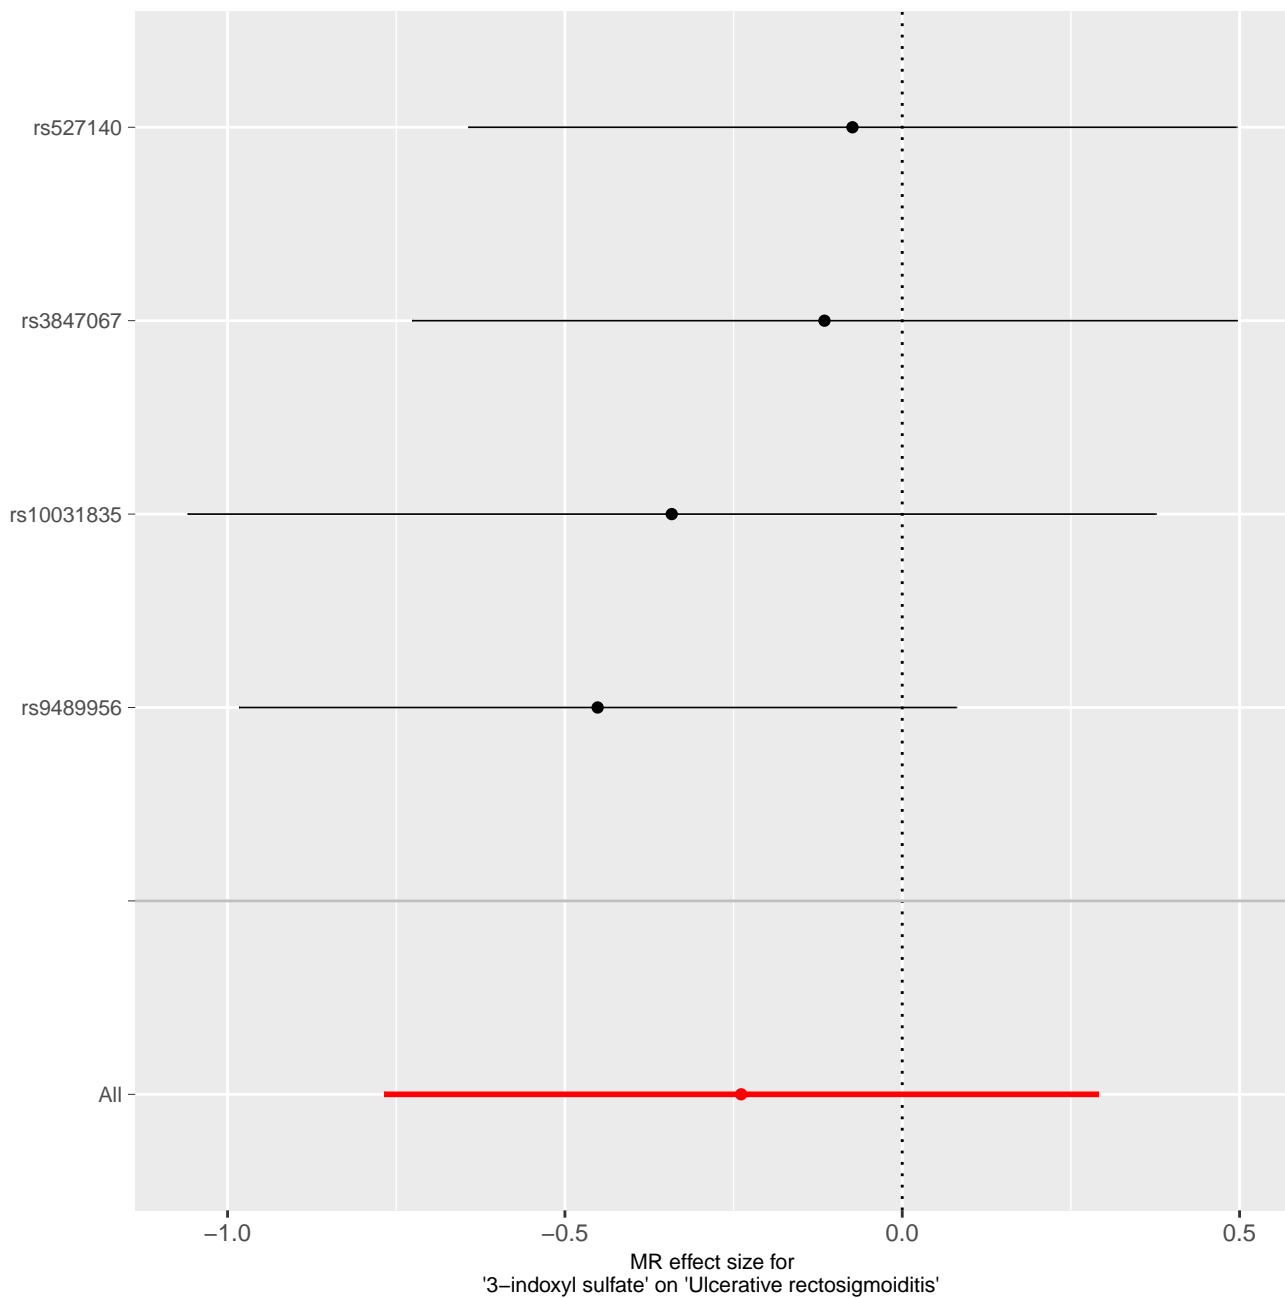

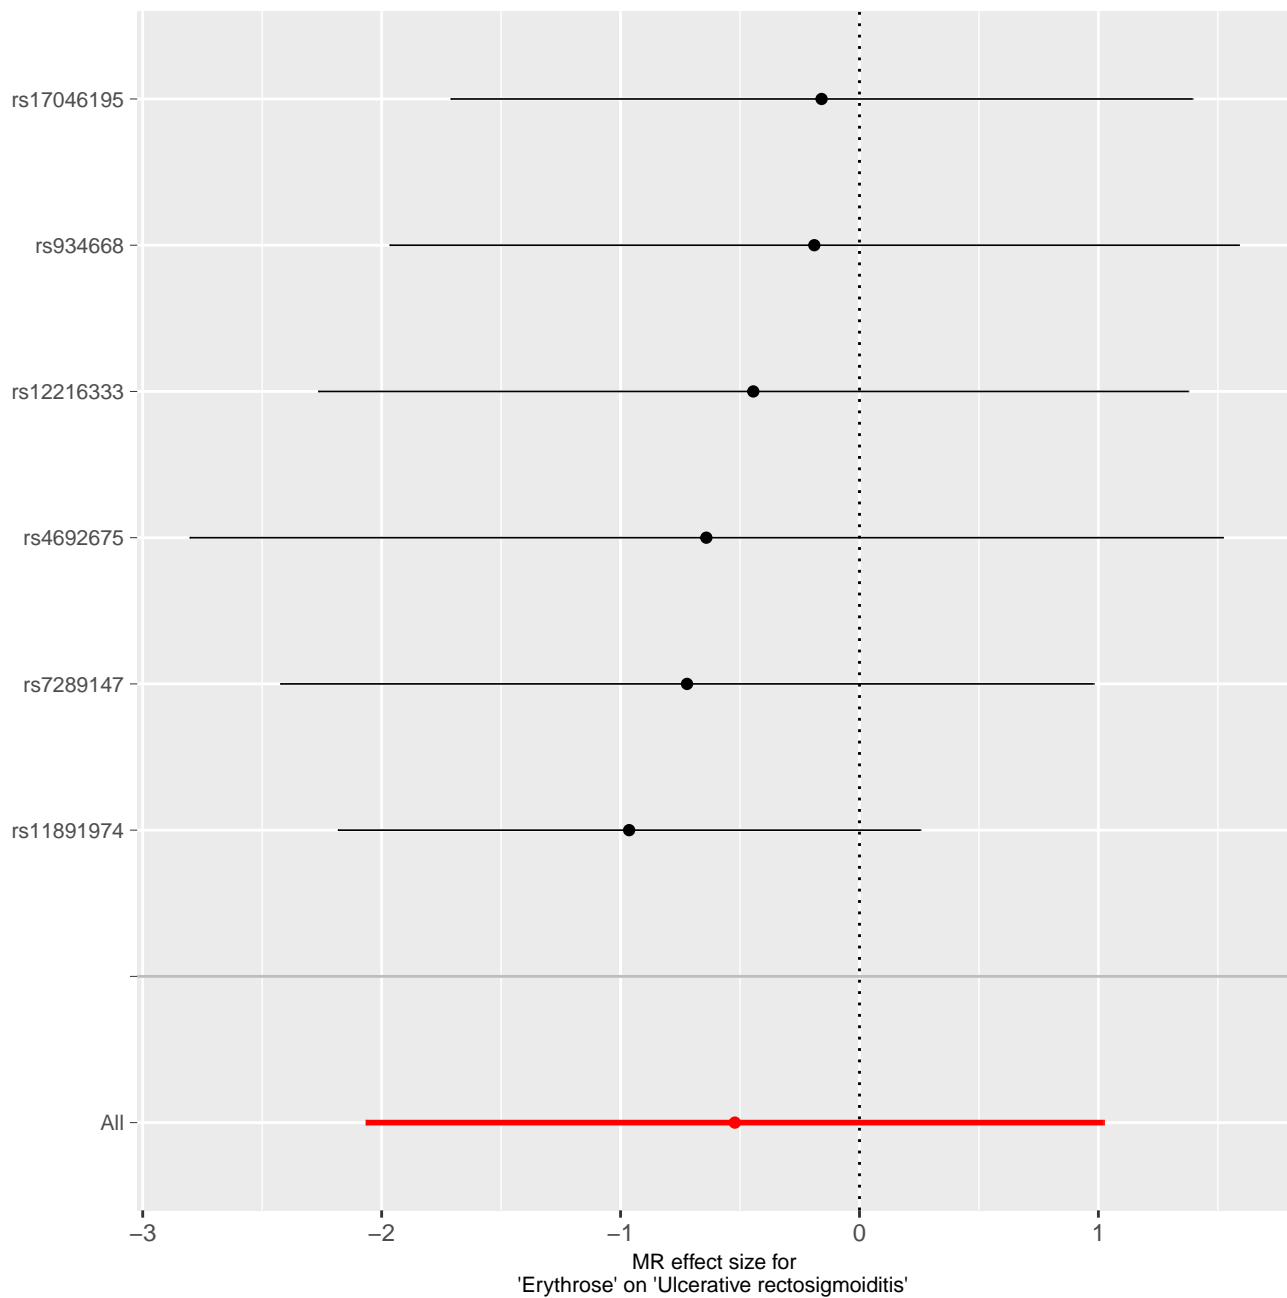

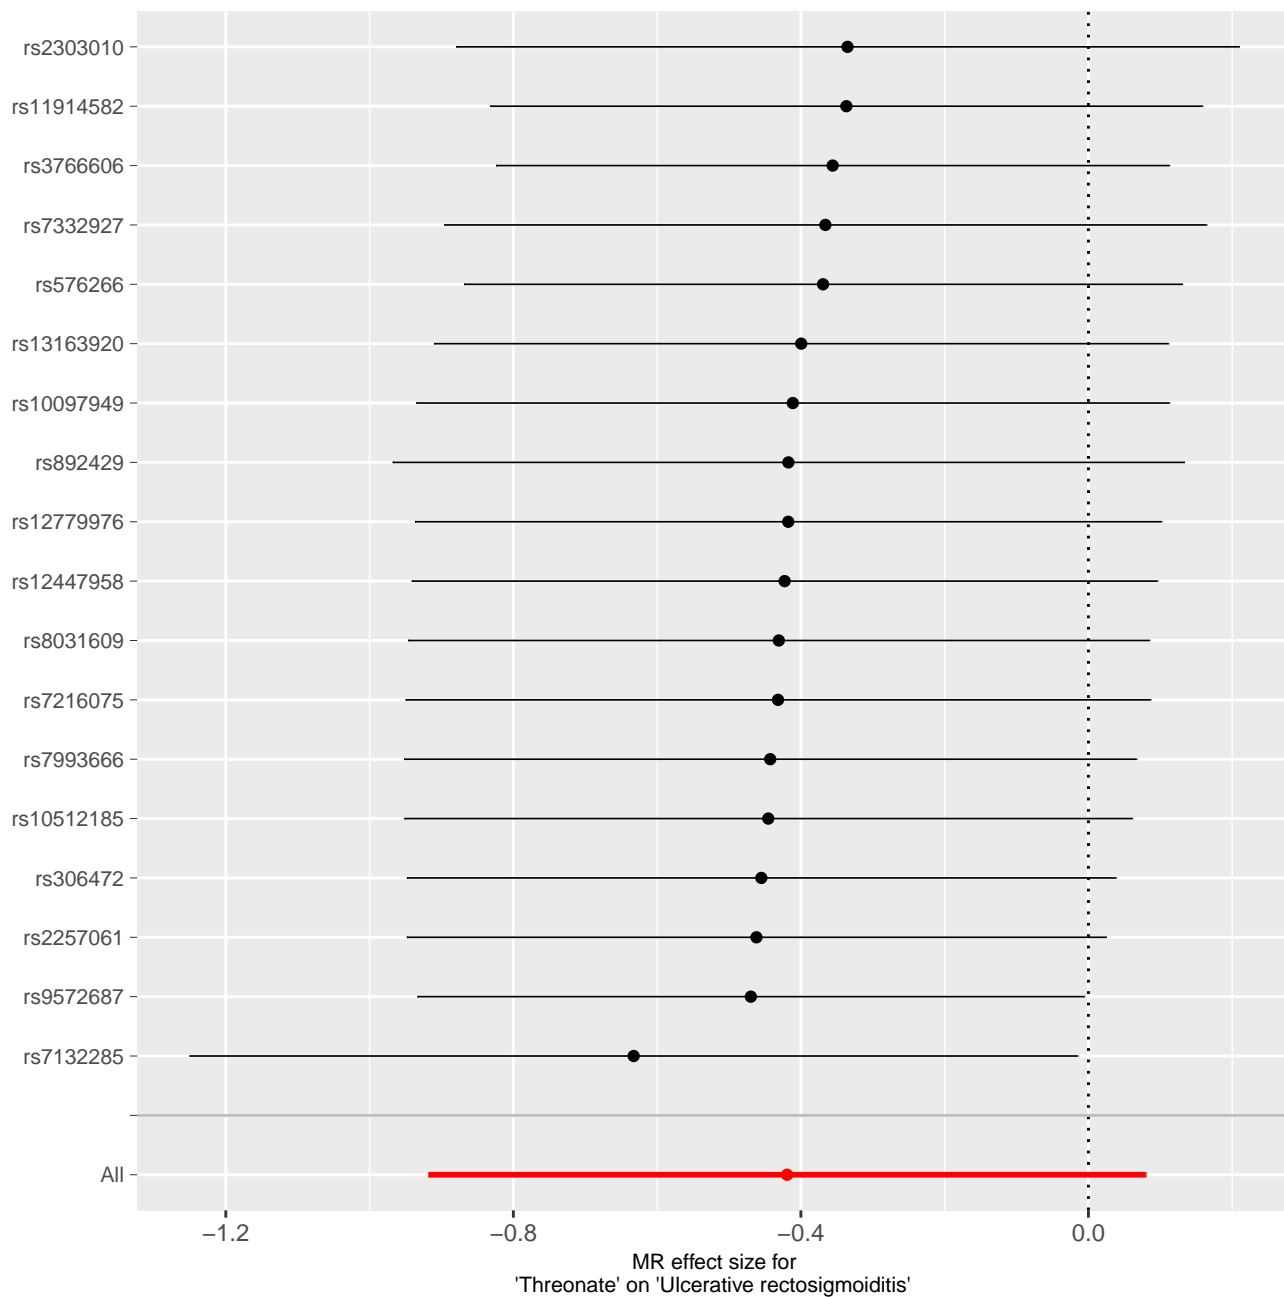

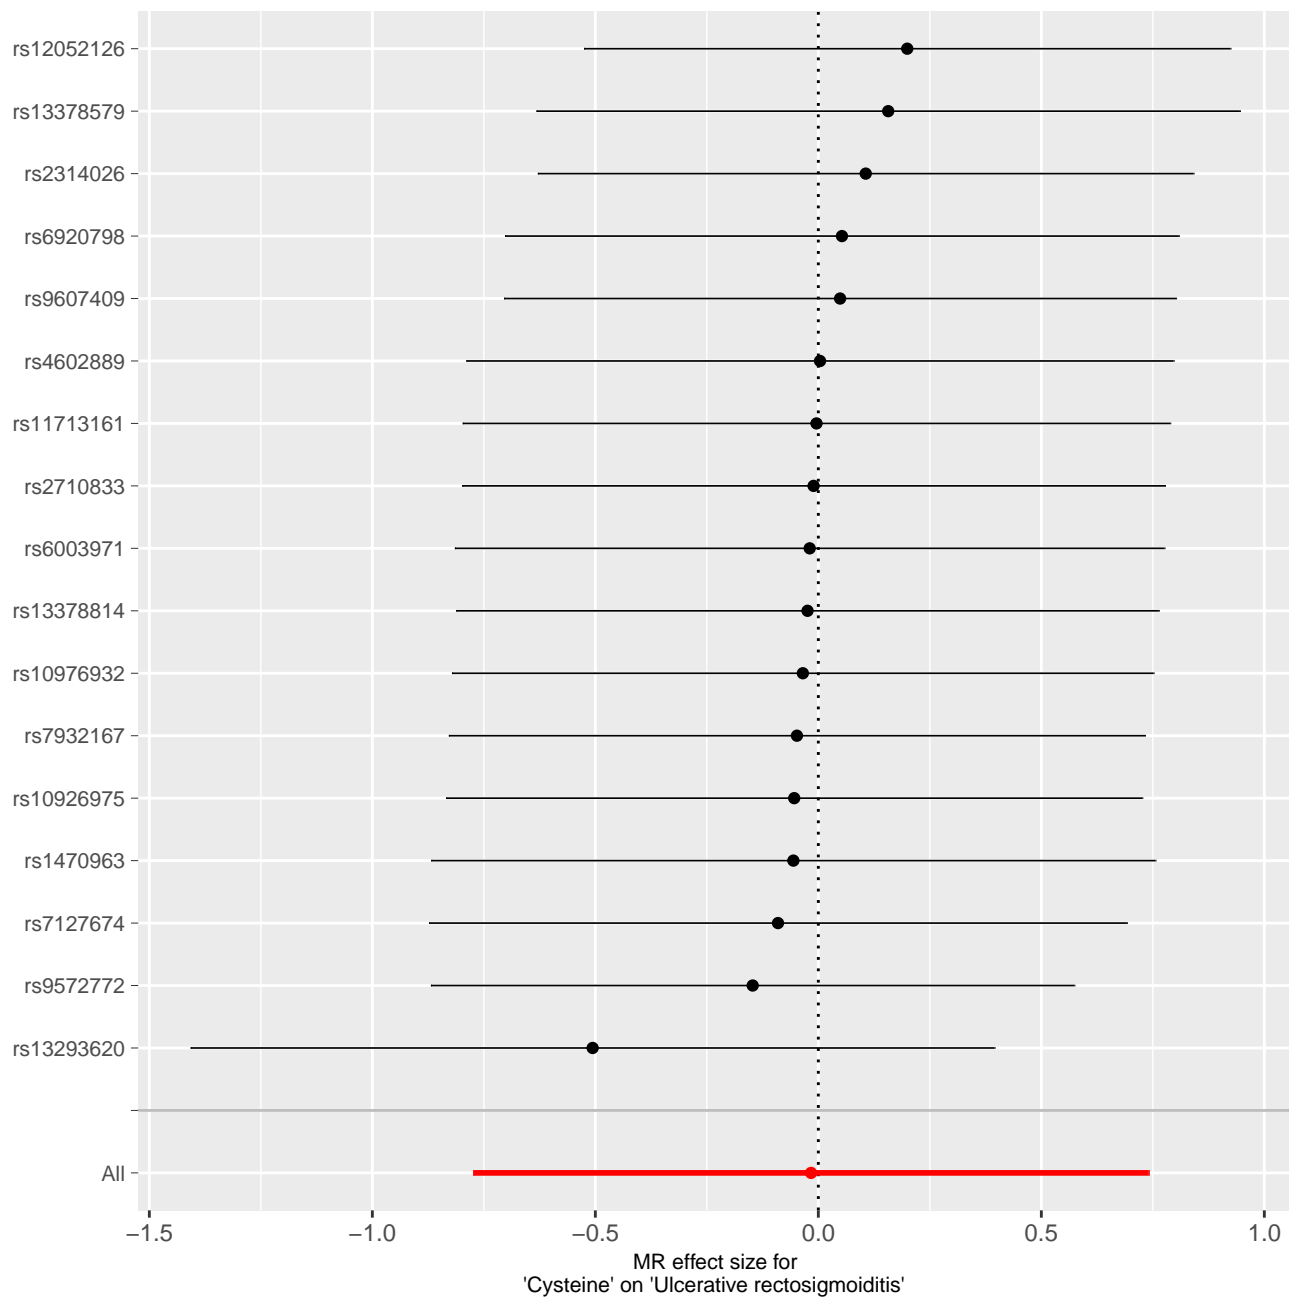

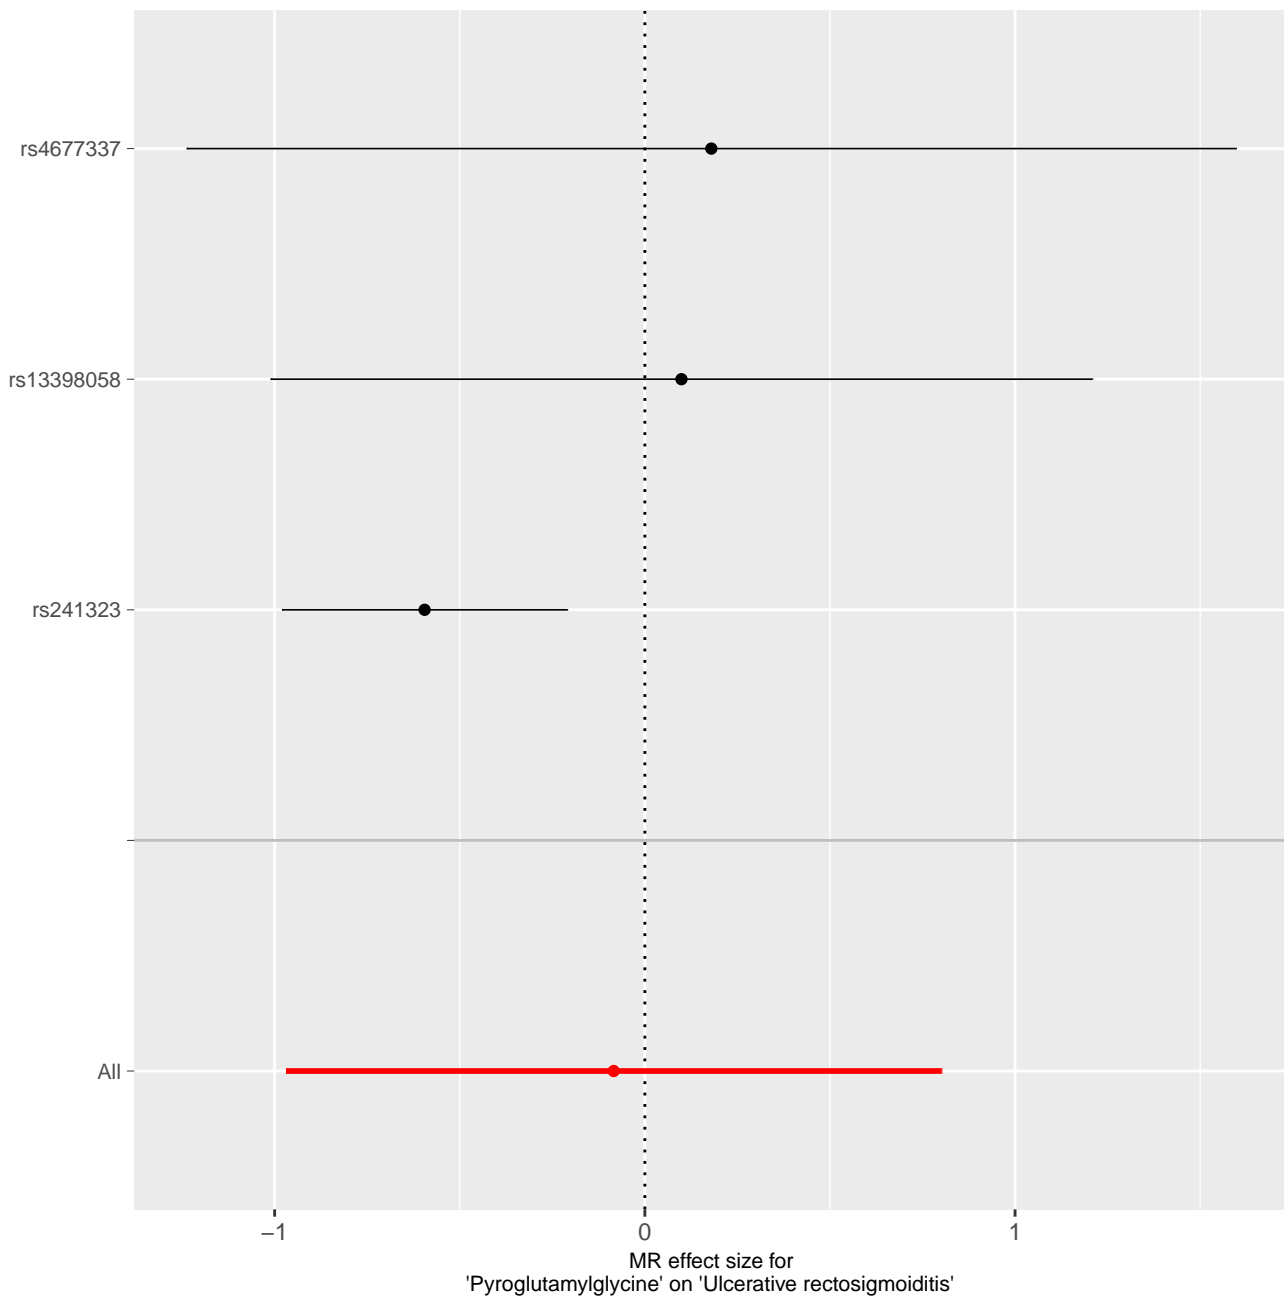

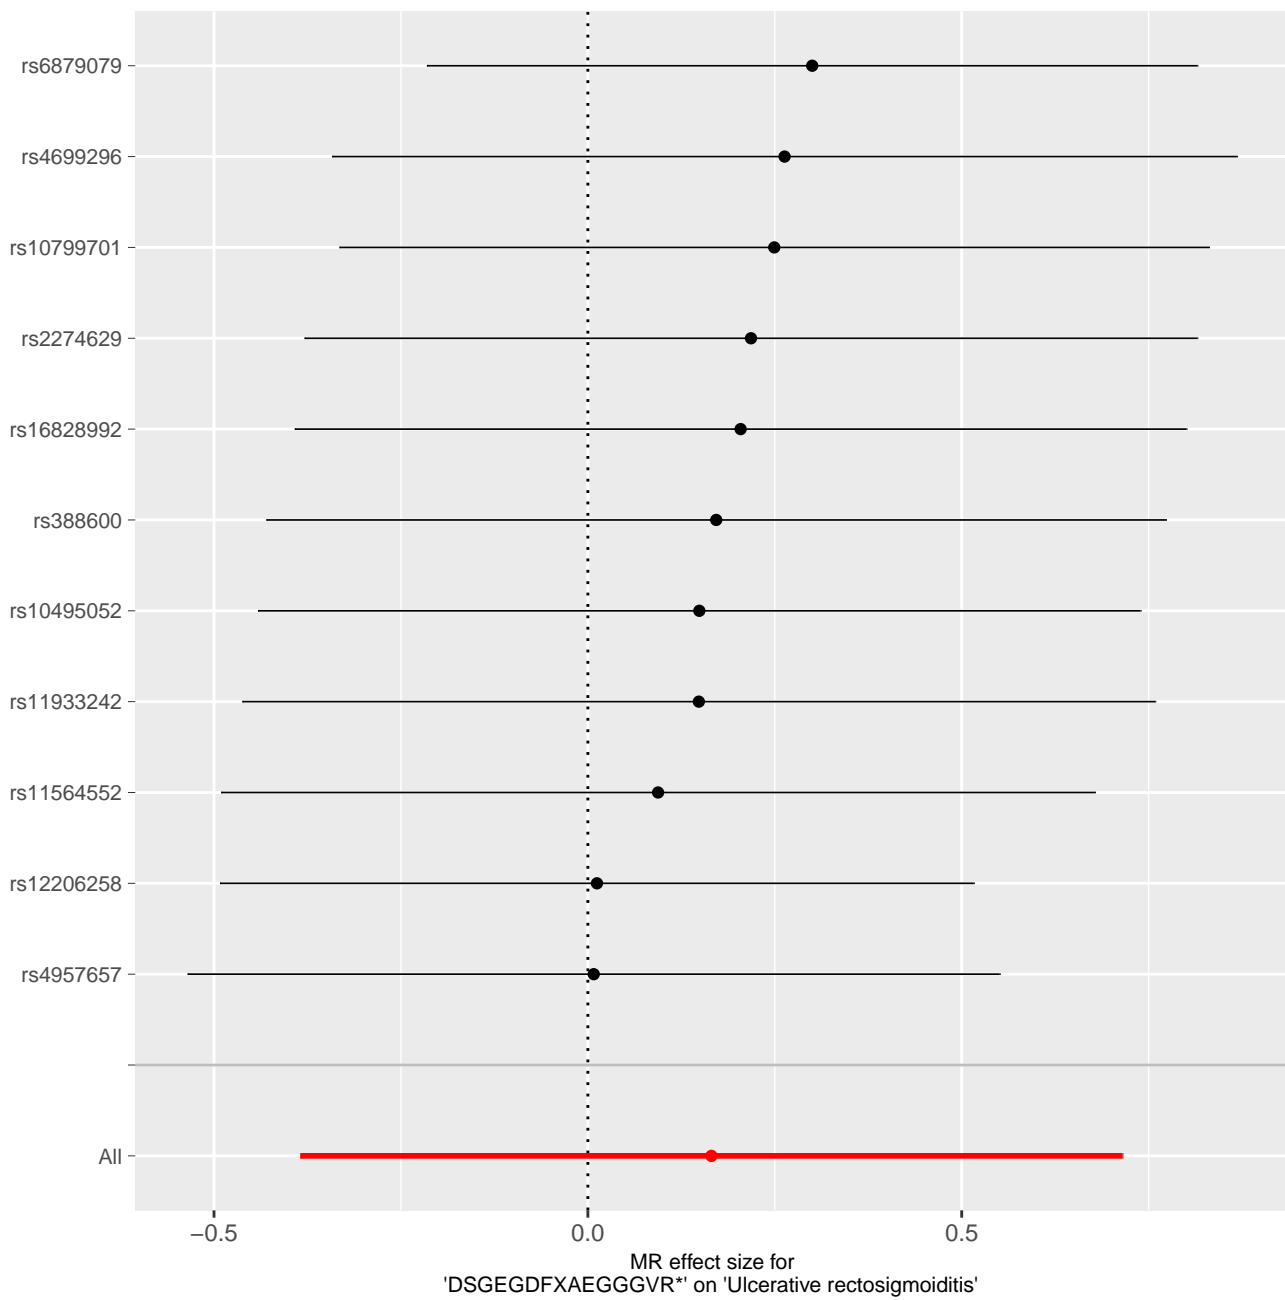

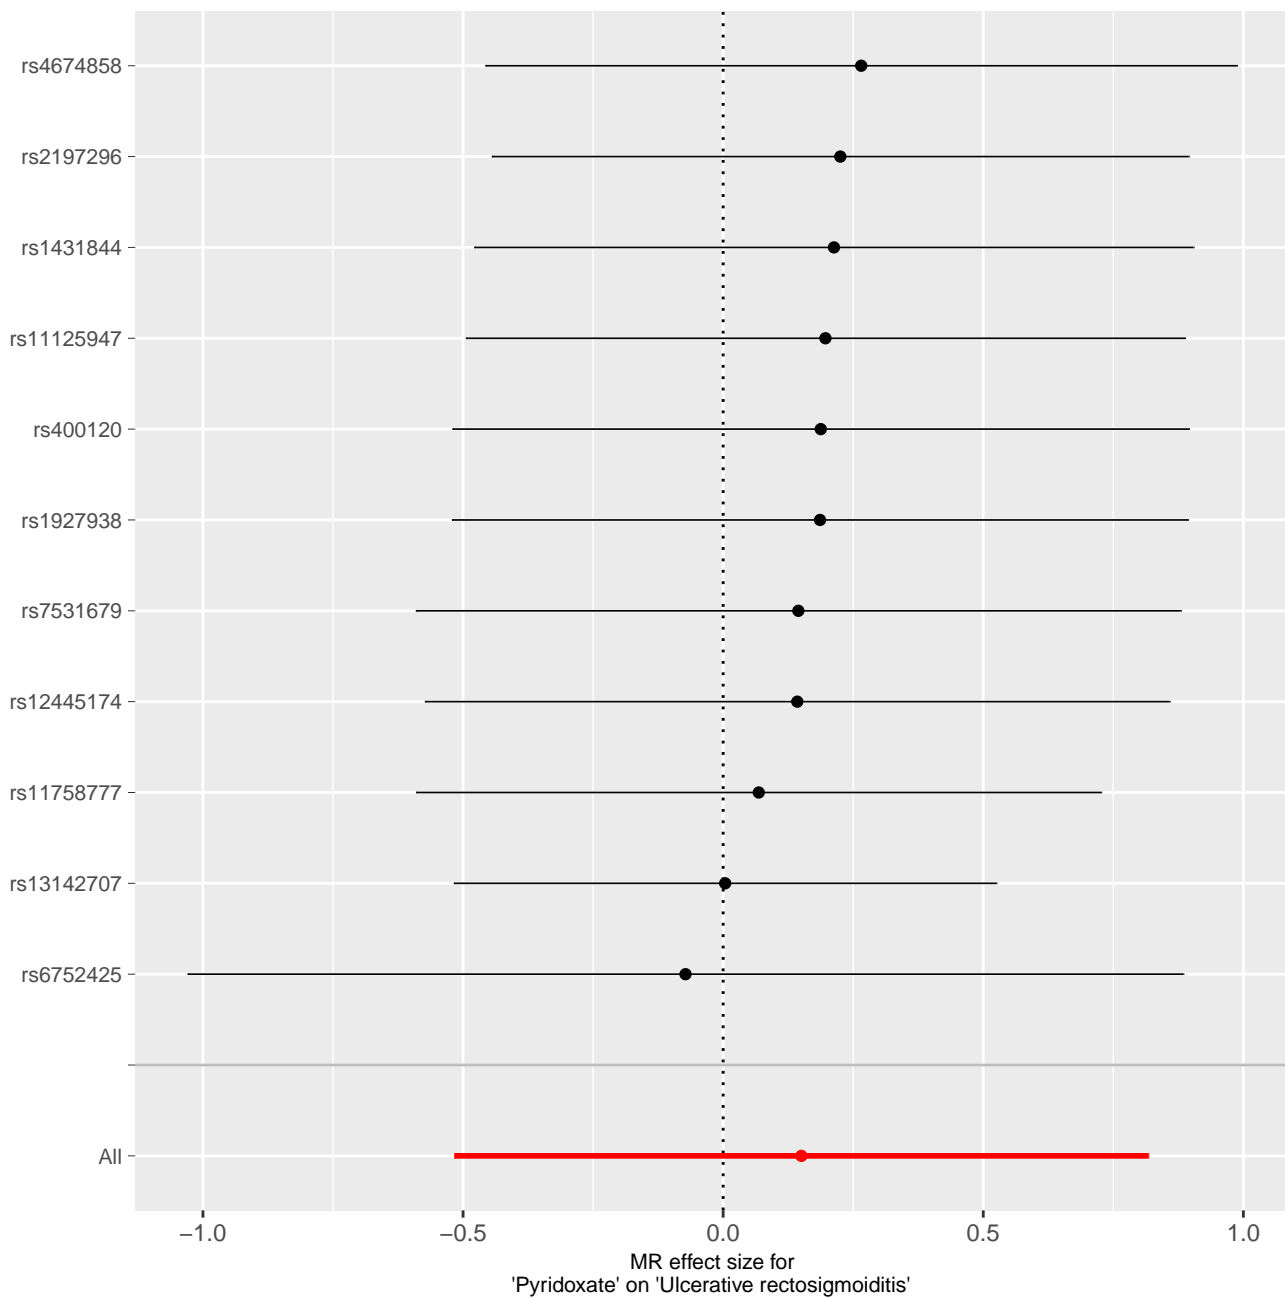

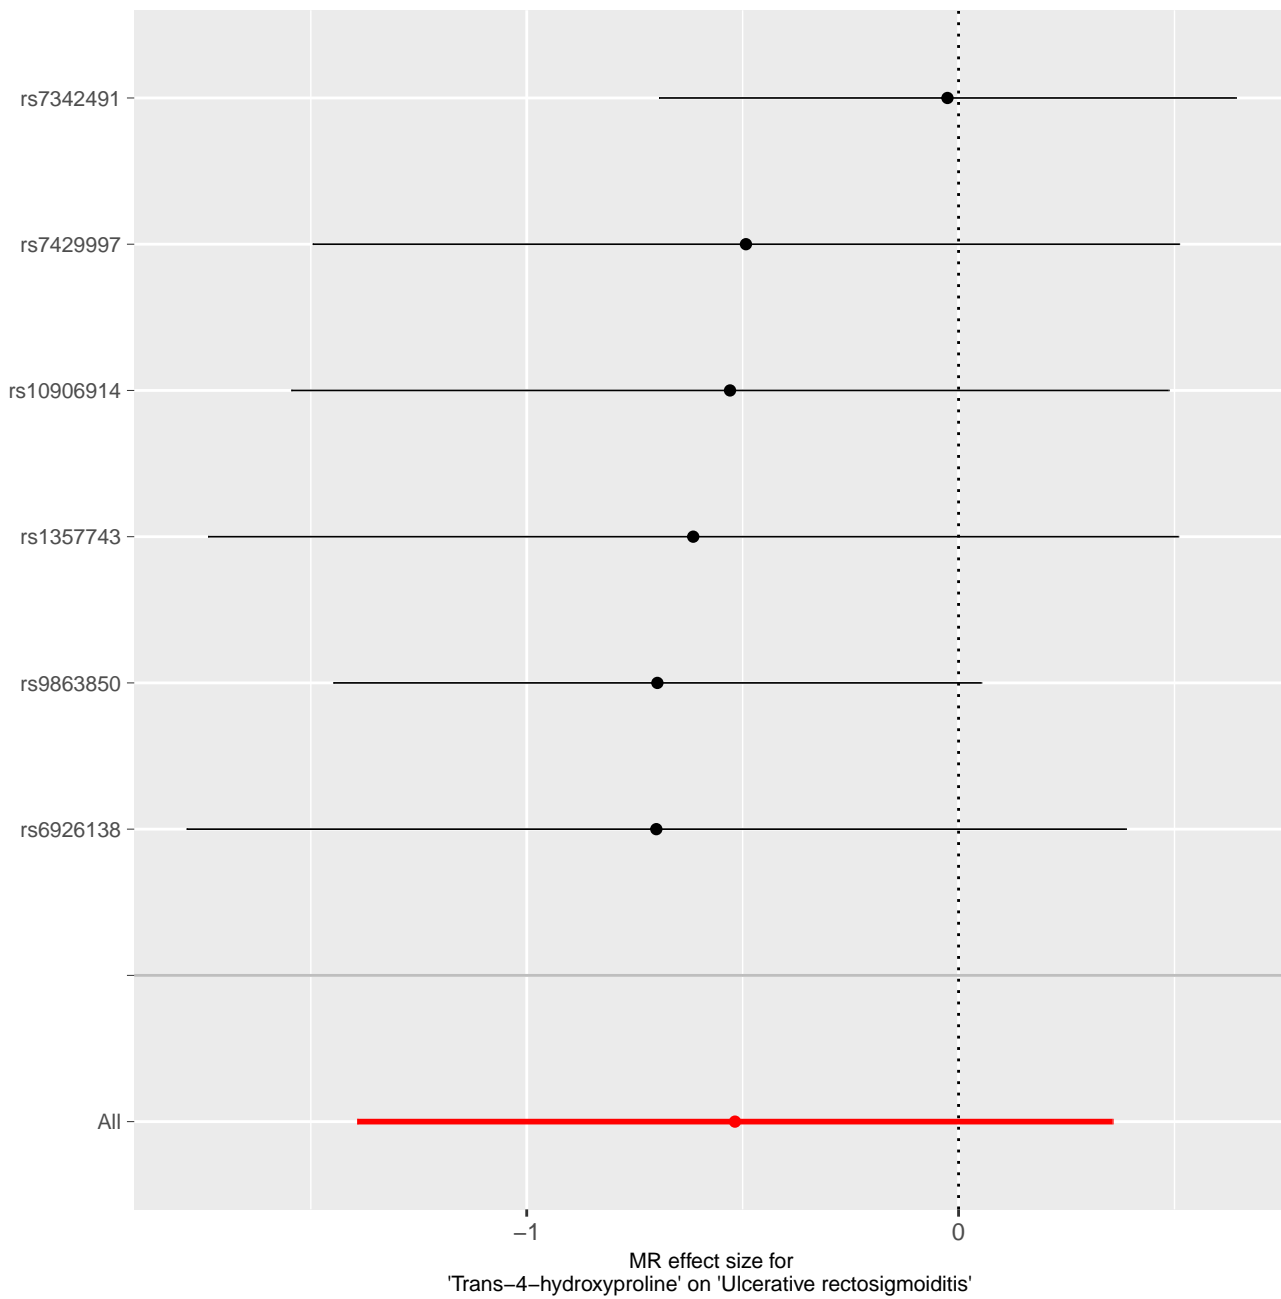



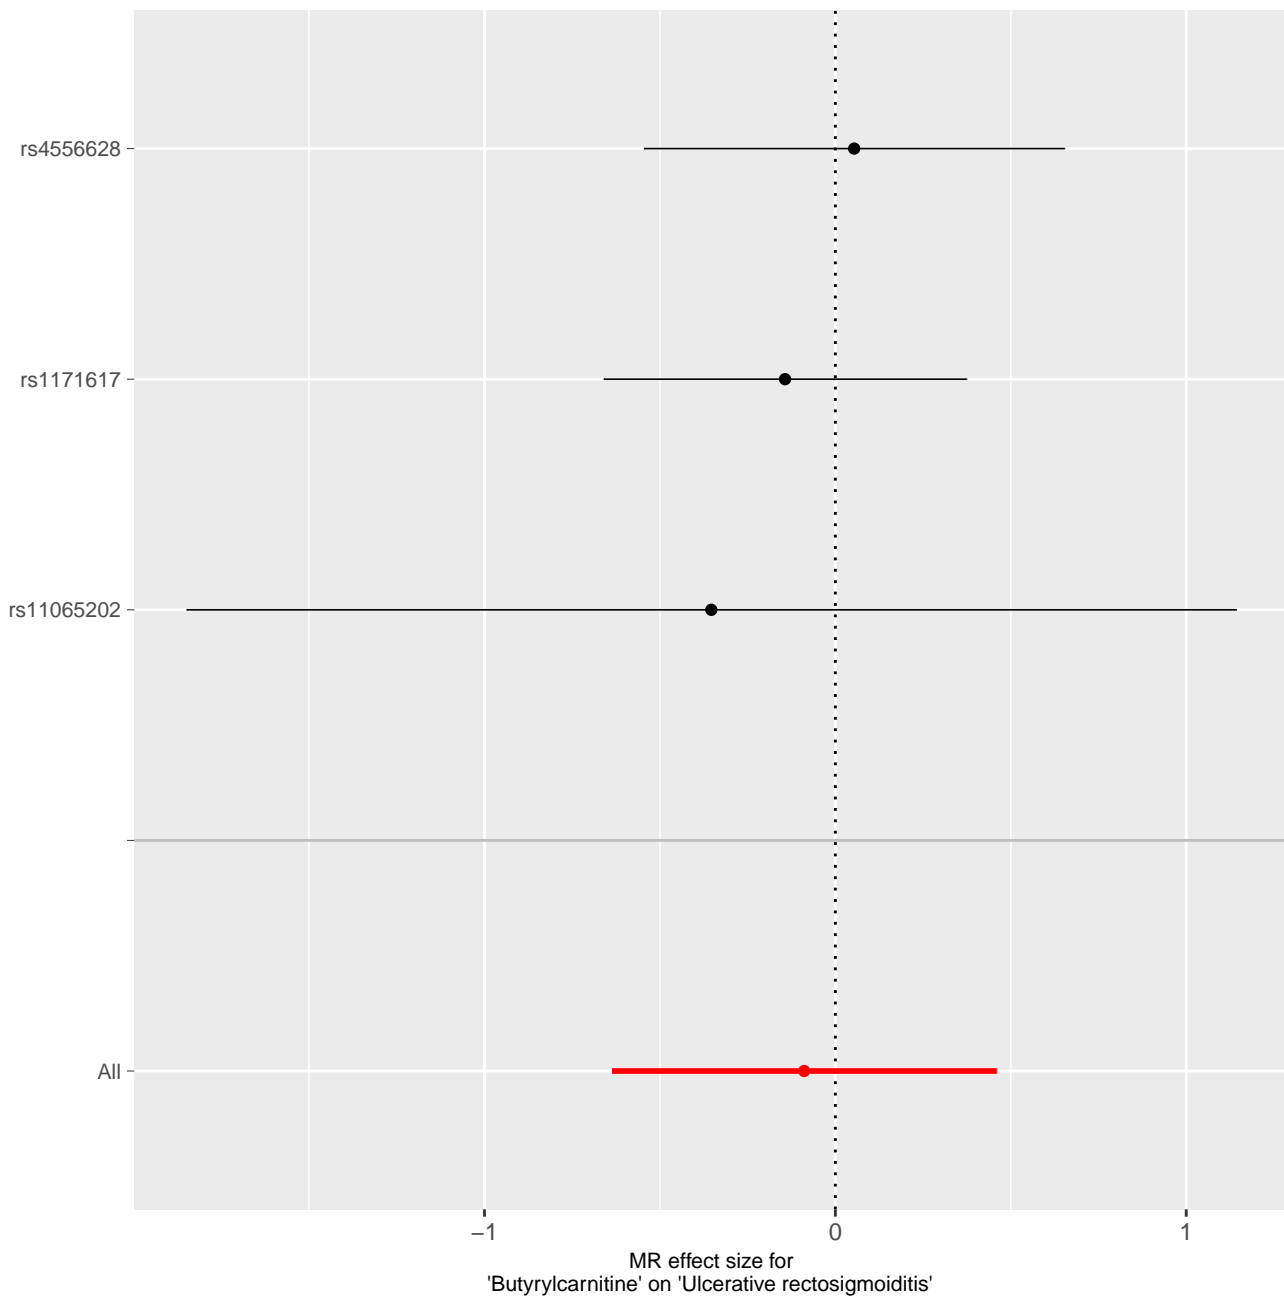

Batch 2623 : Caproate (6:0) on Ulcerative rectosigmoiditis

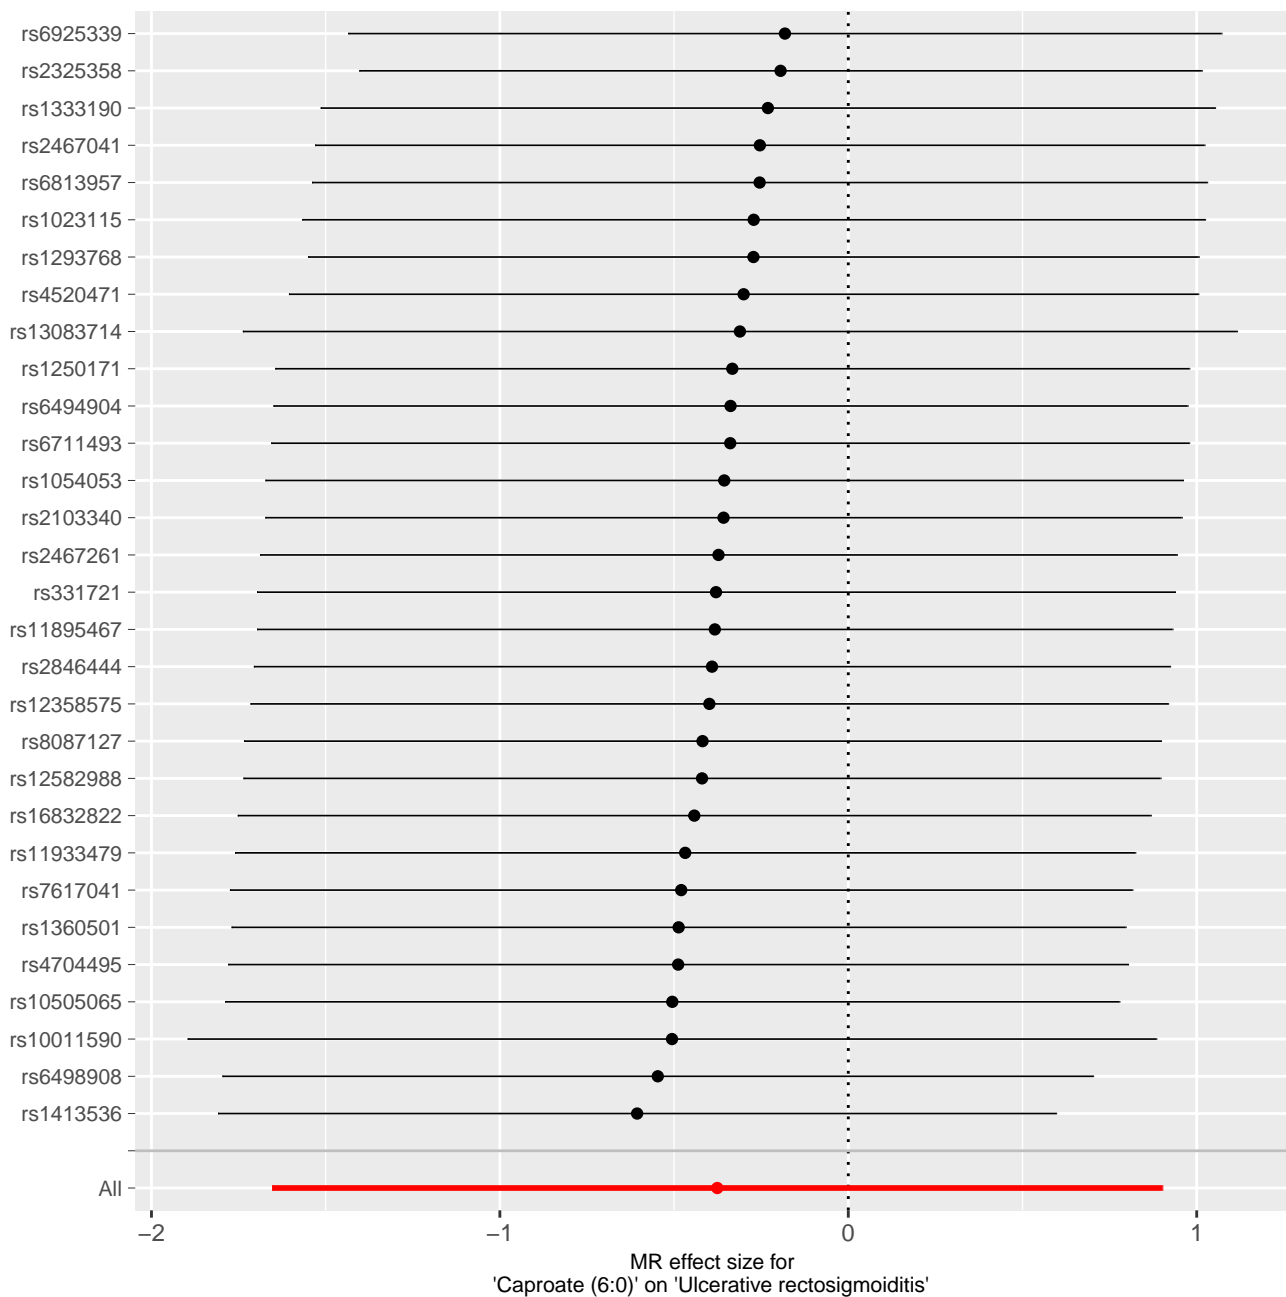

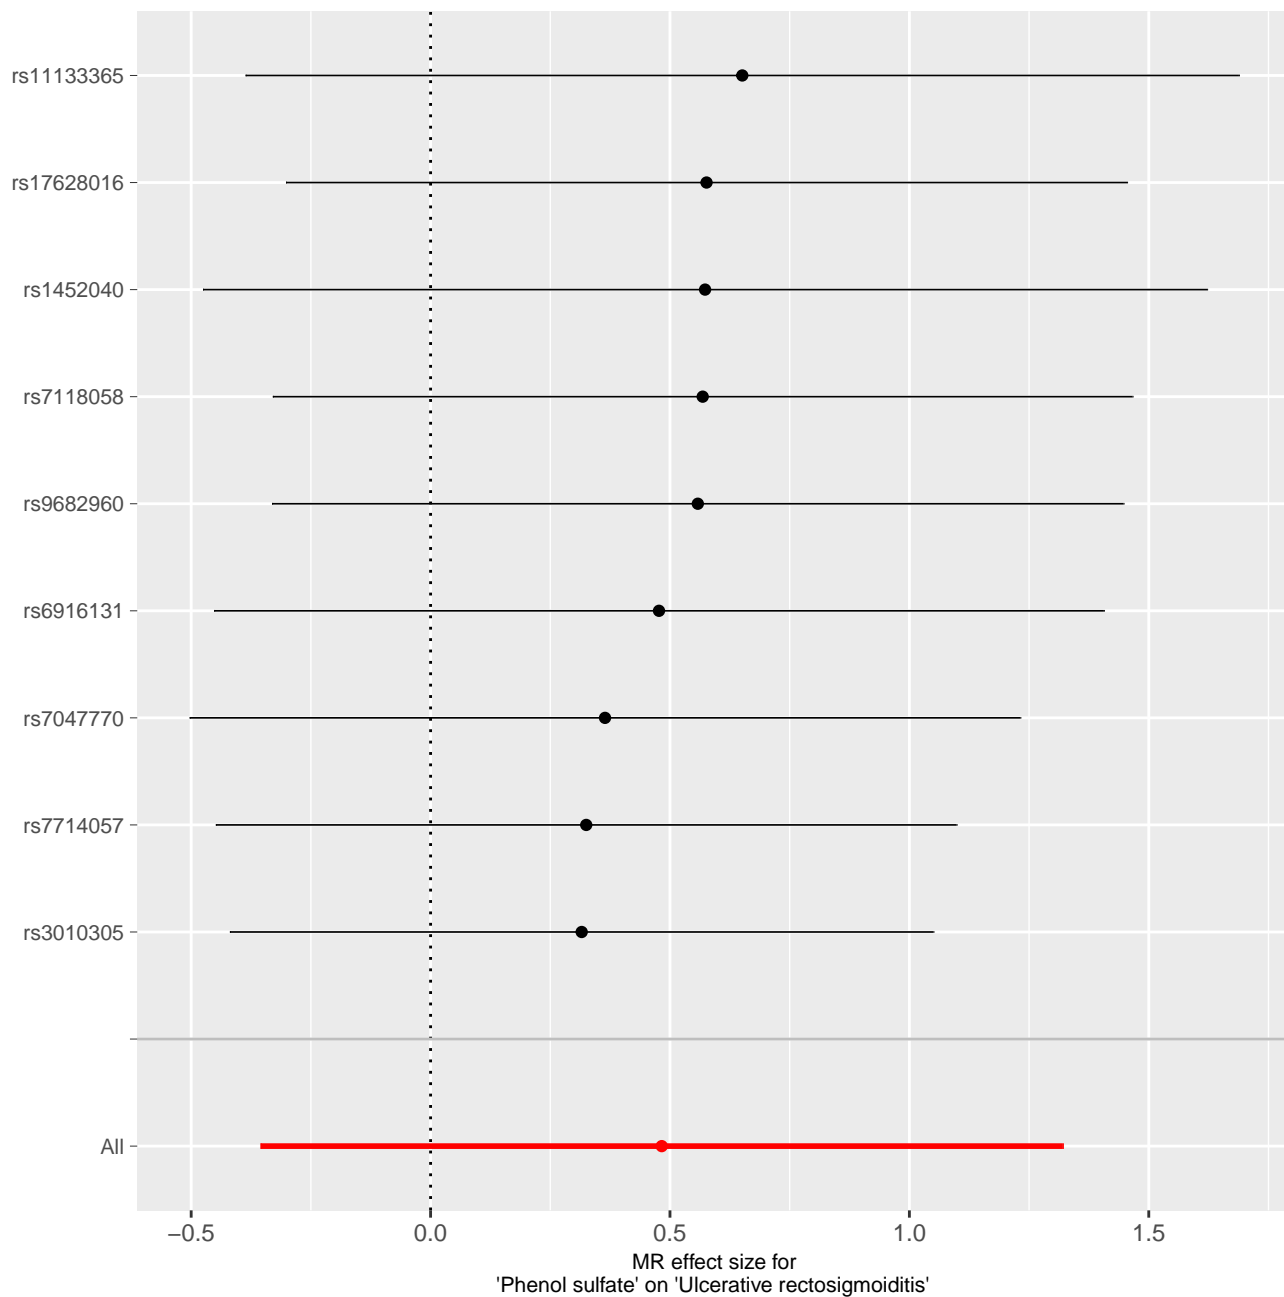

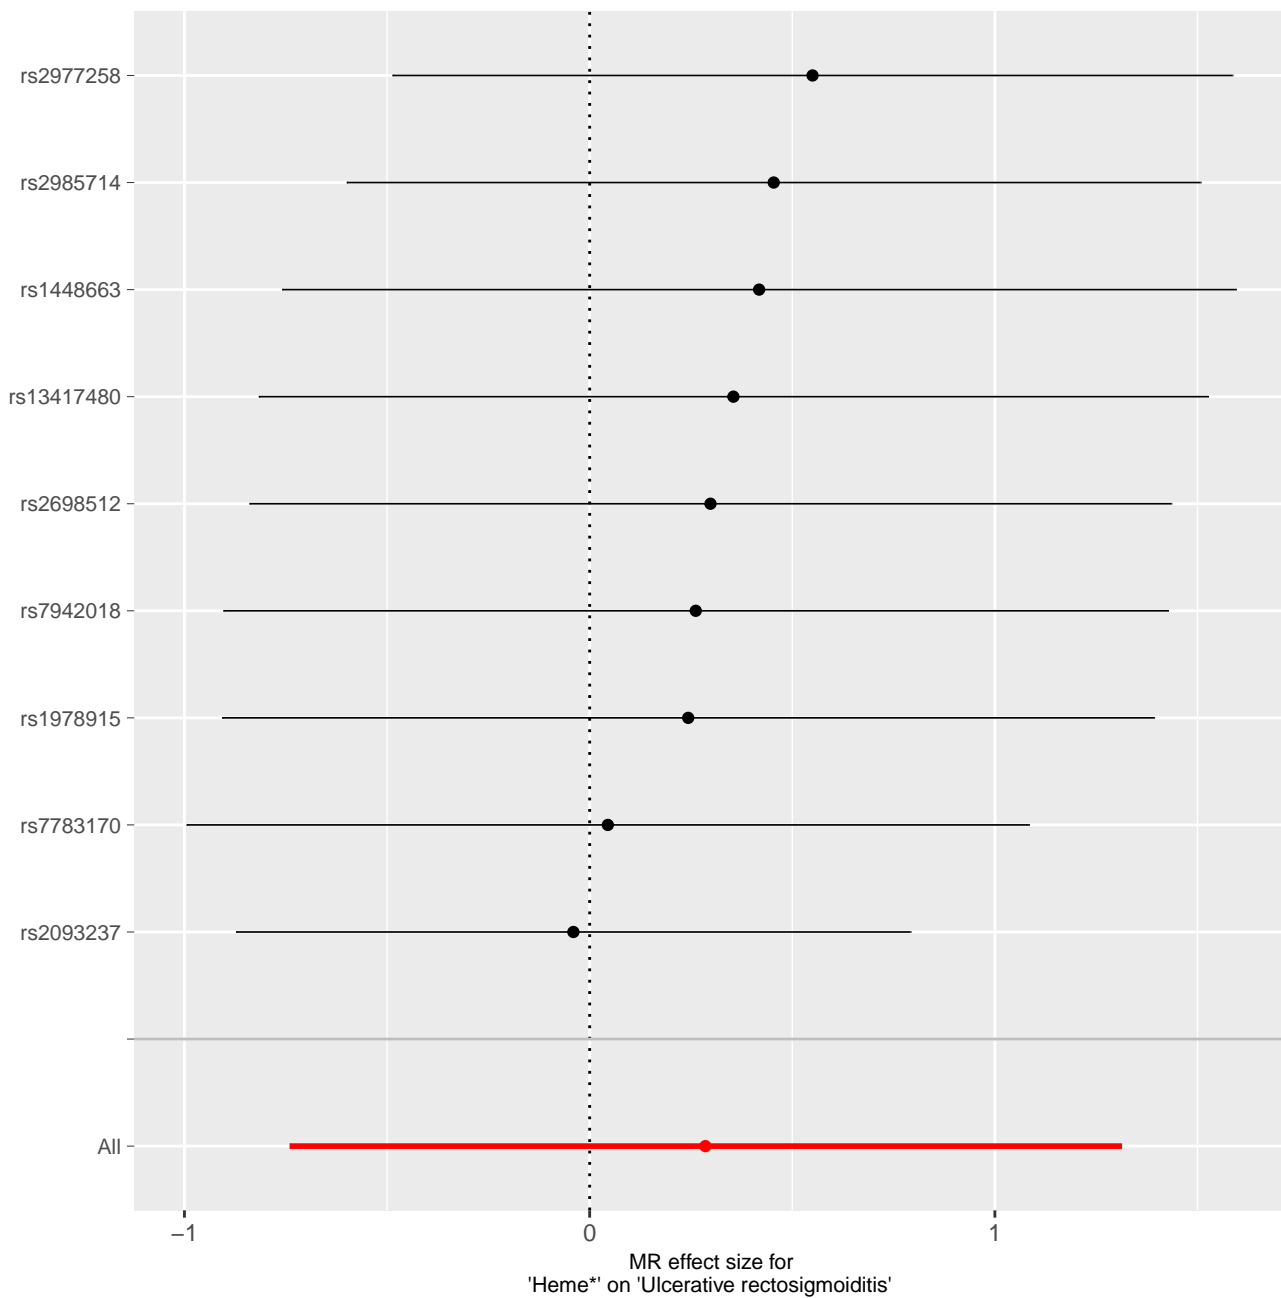

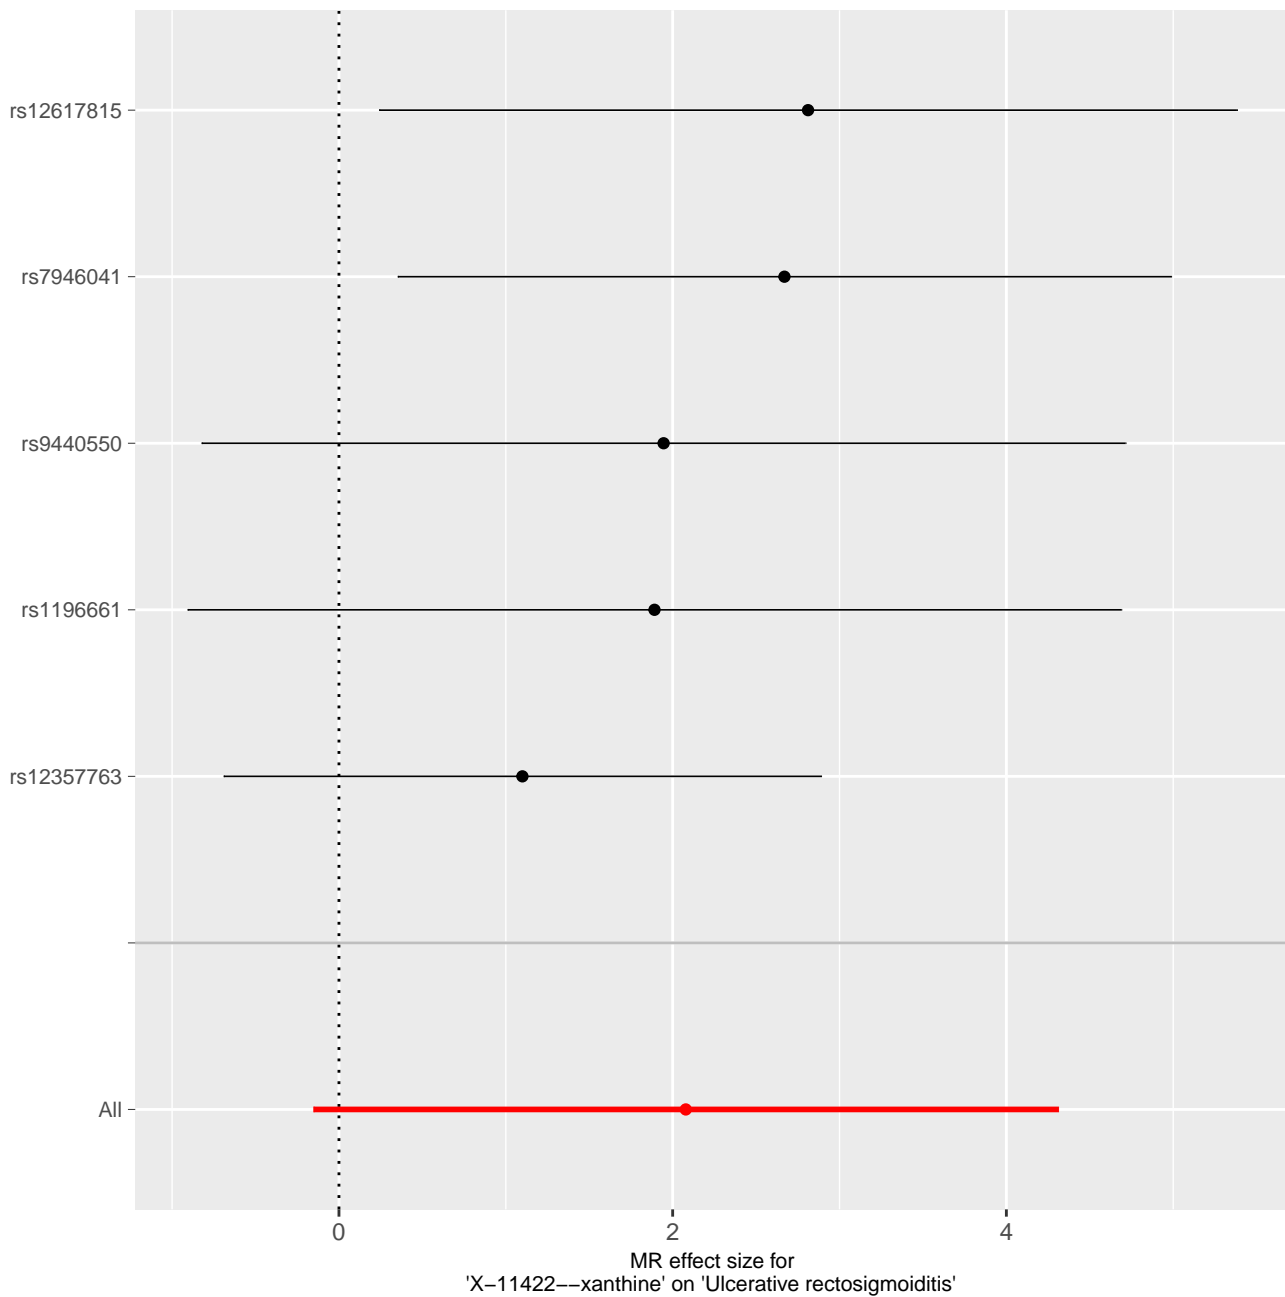

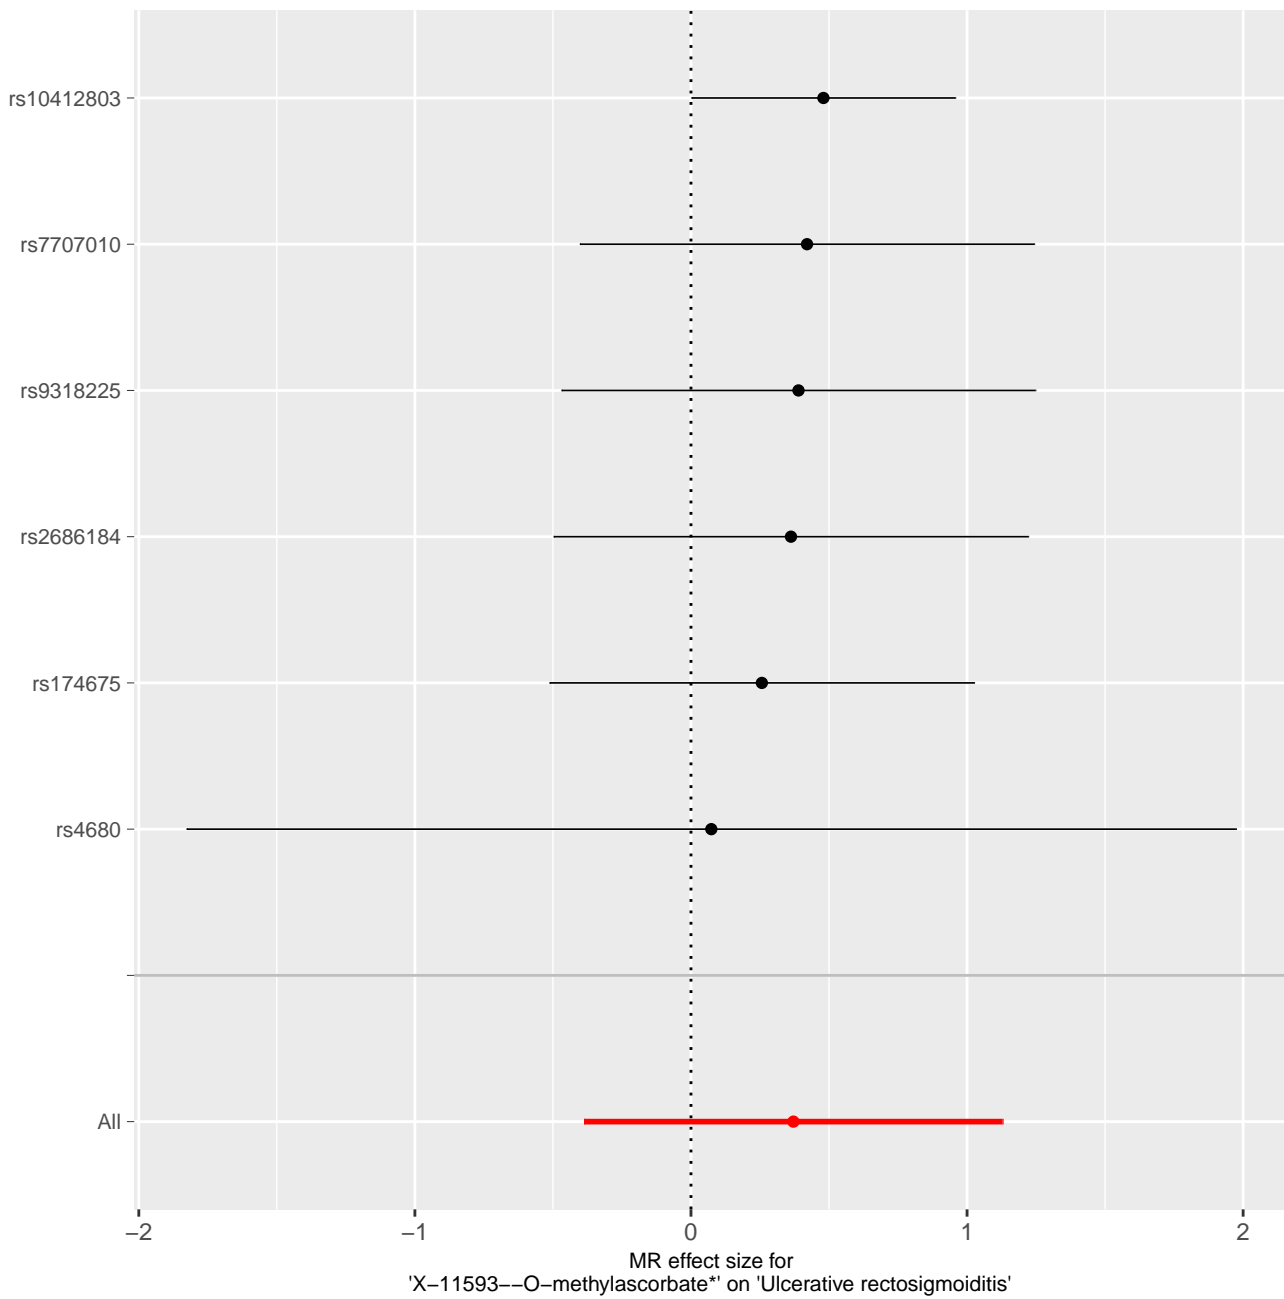

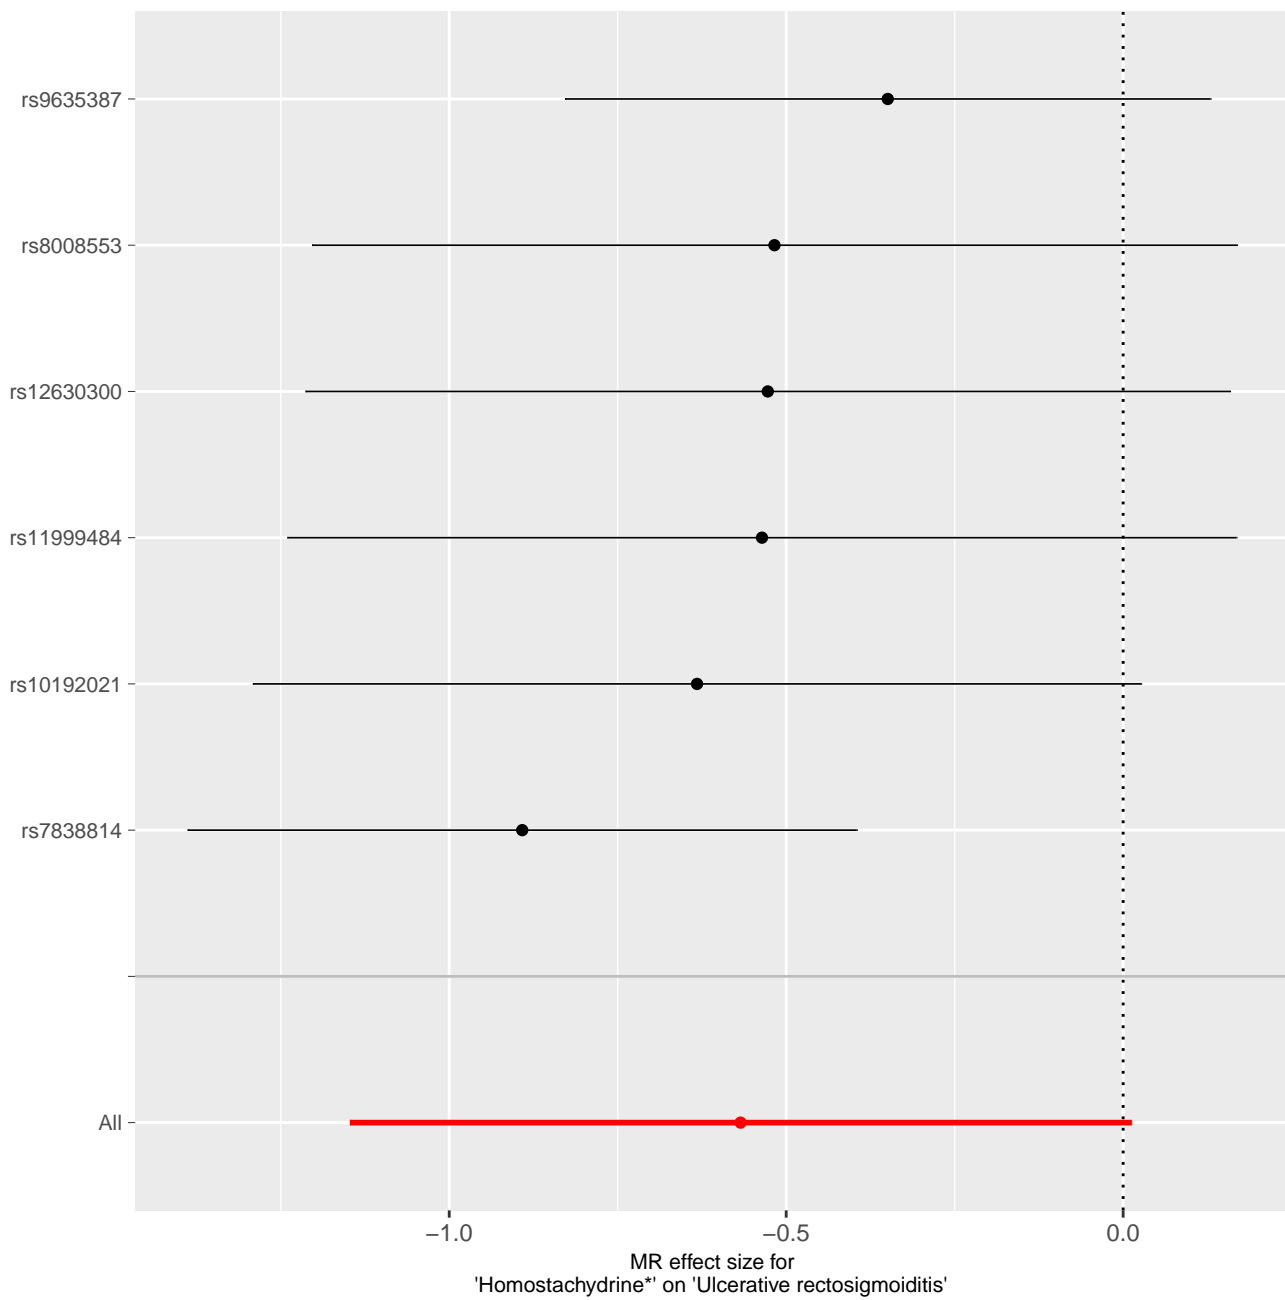

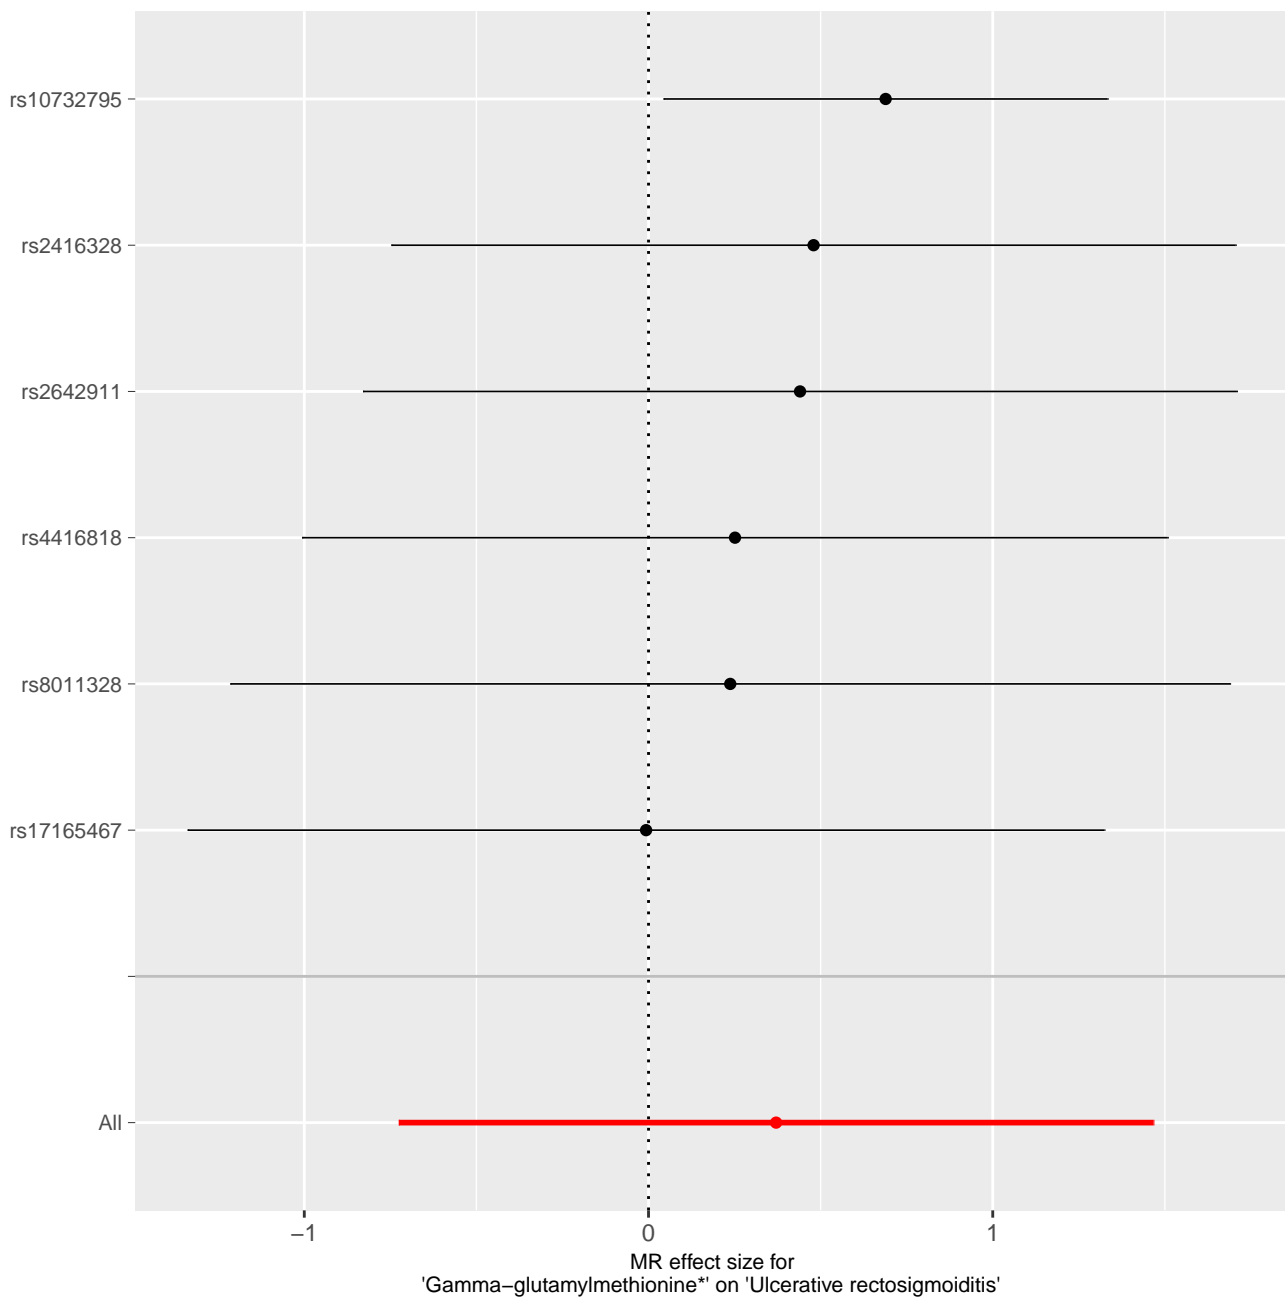



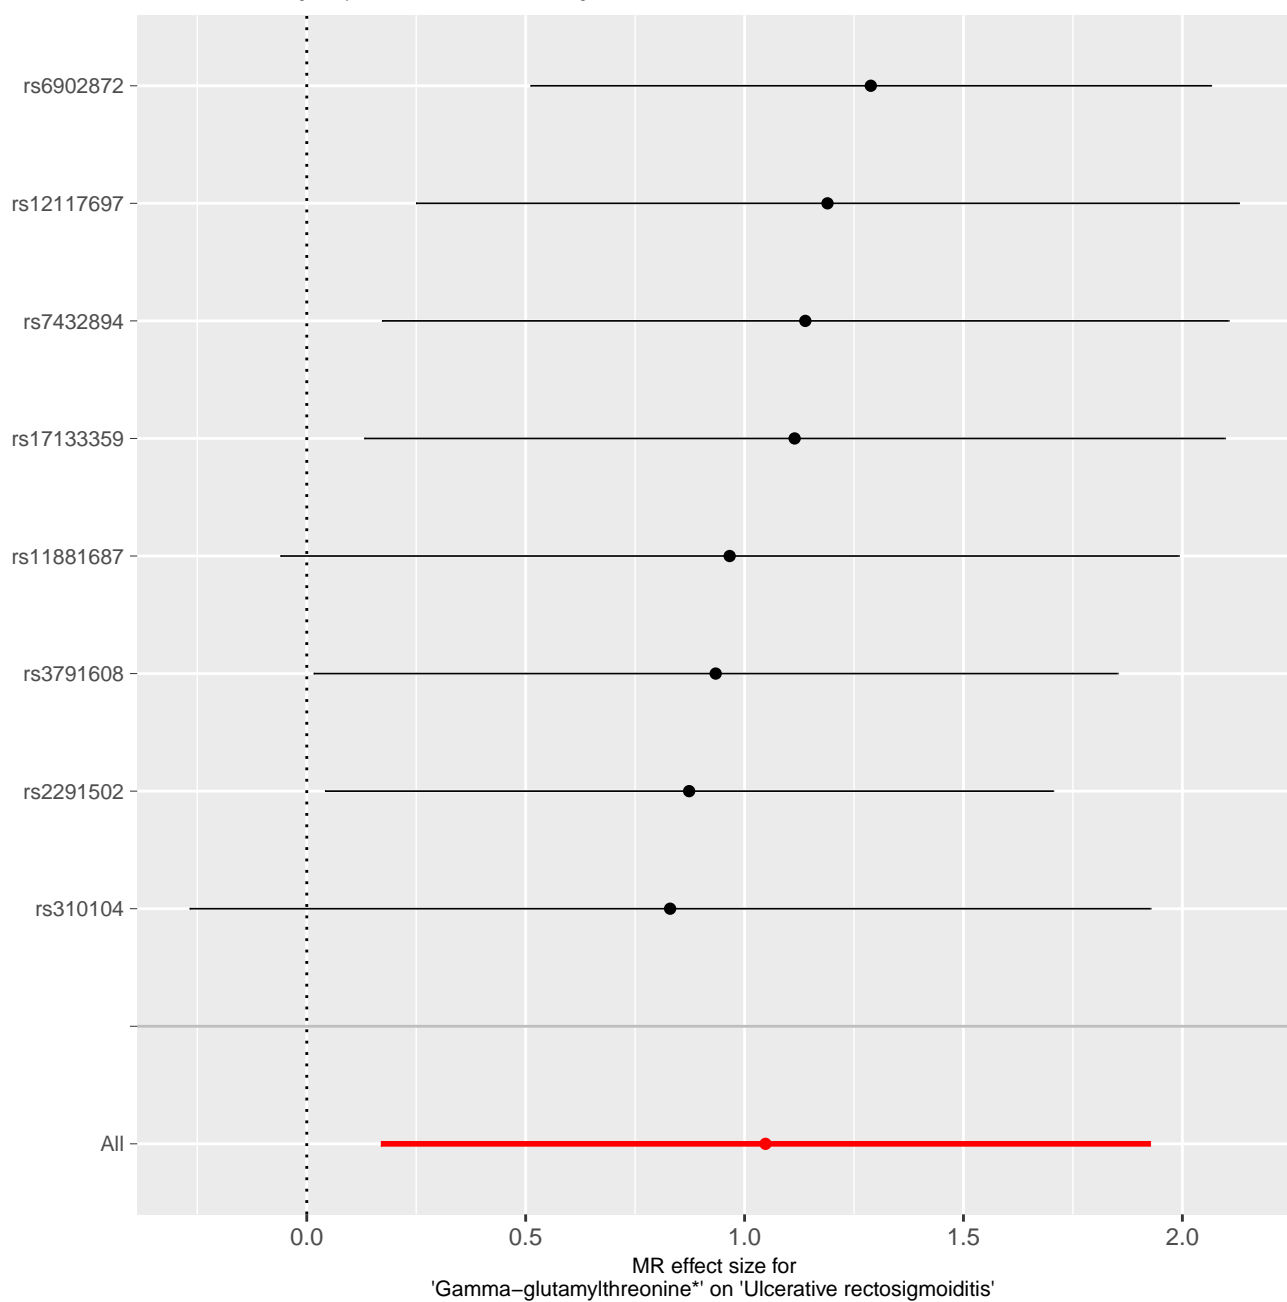

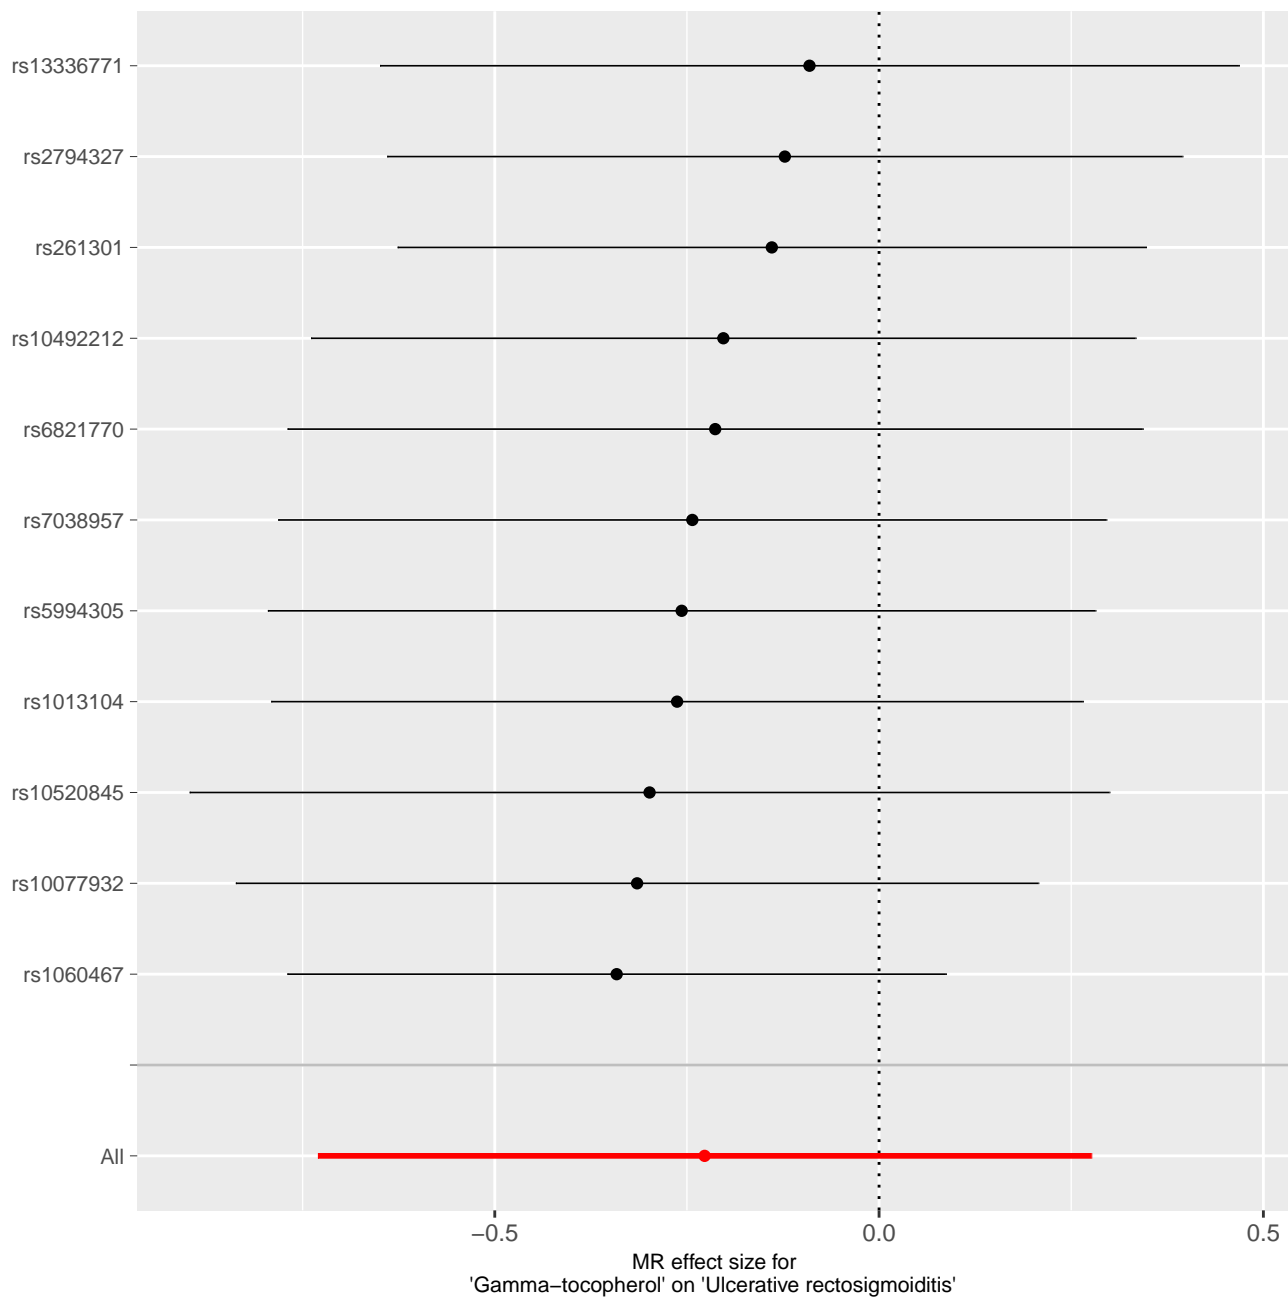

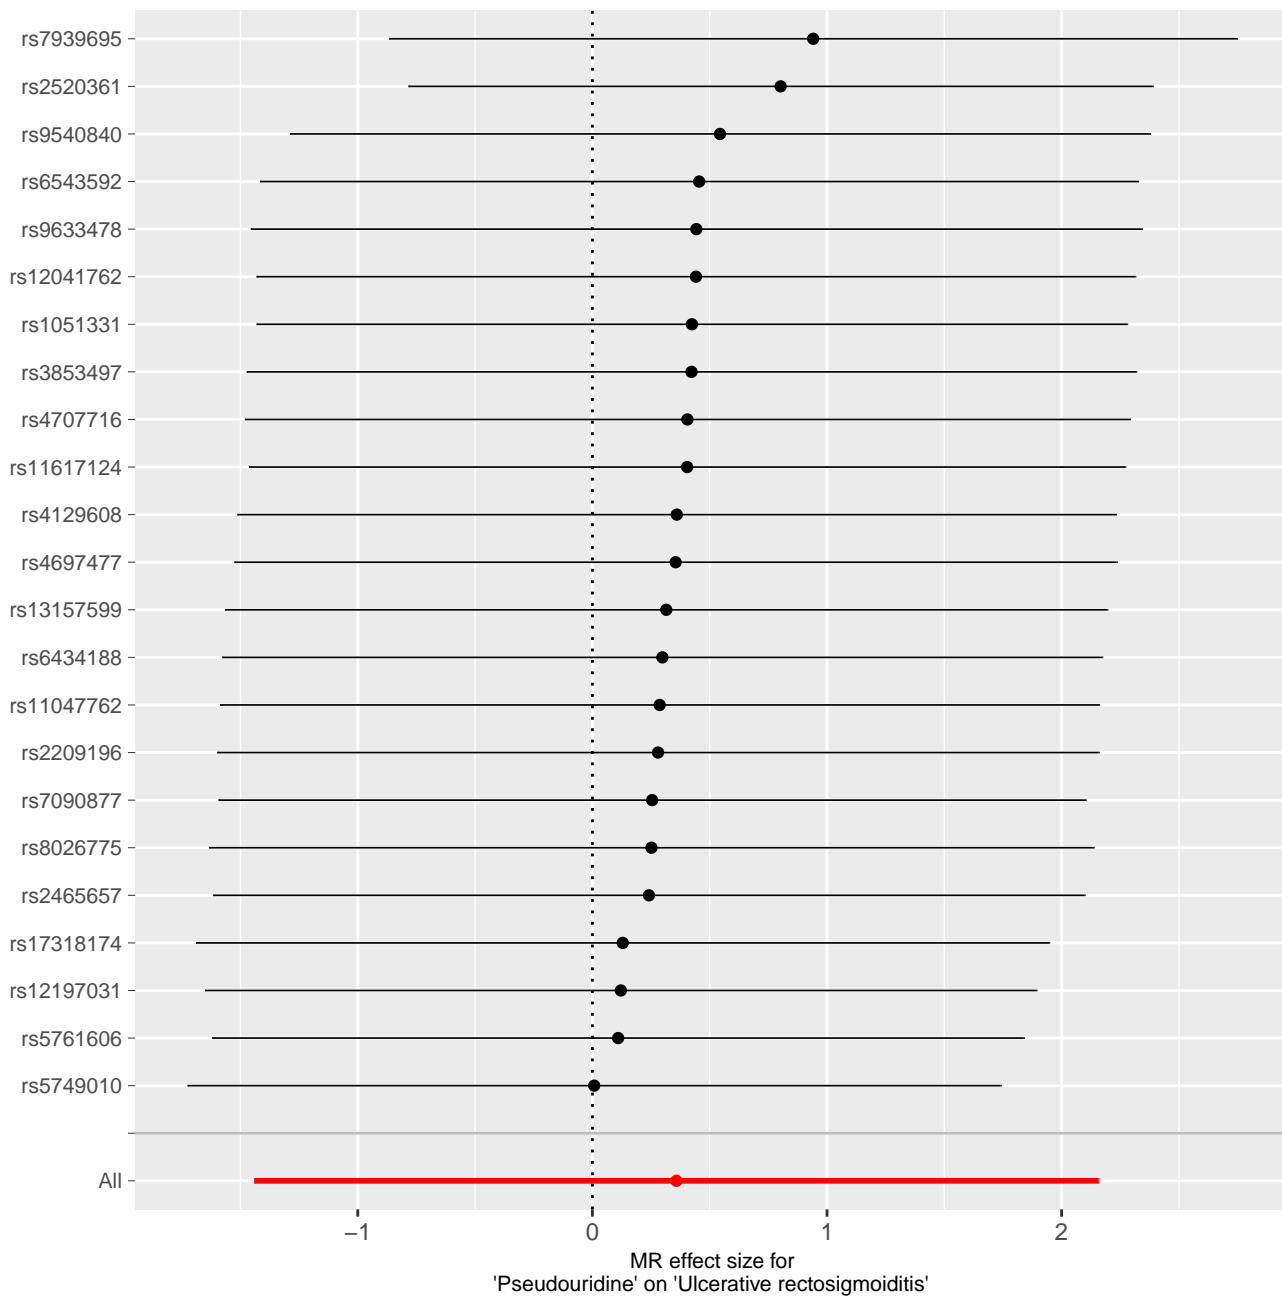

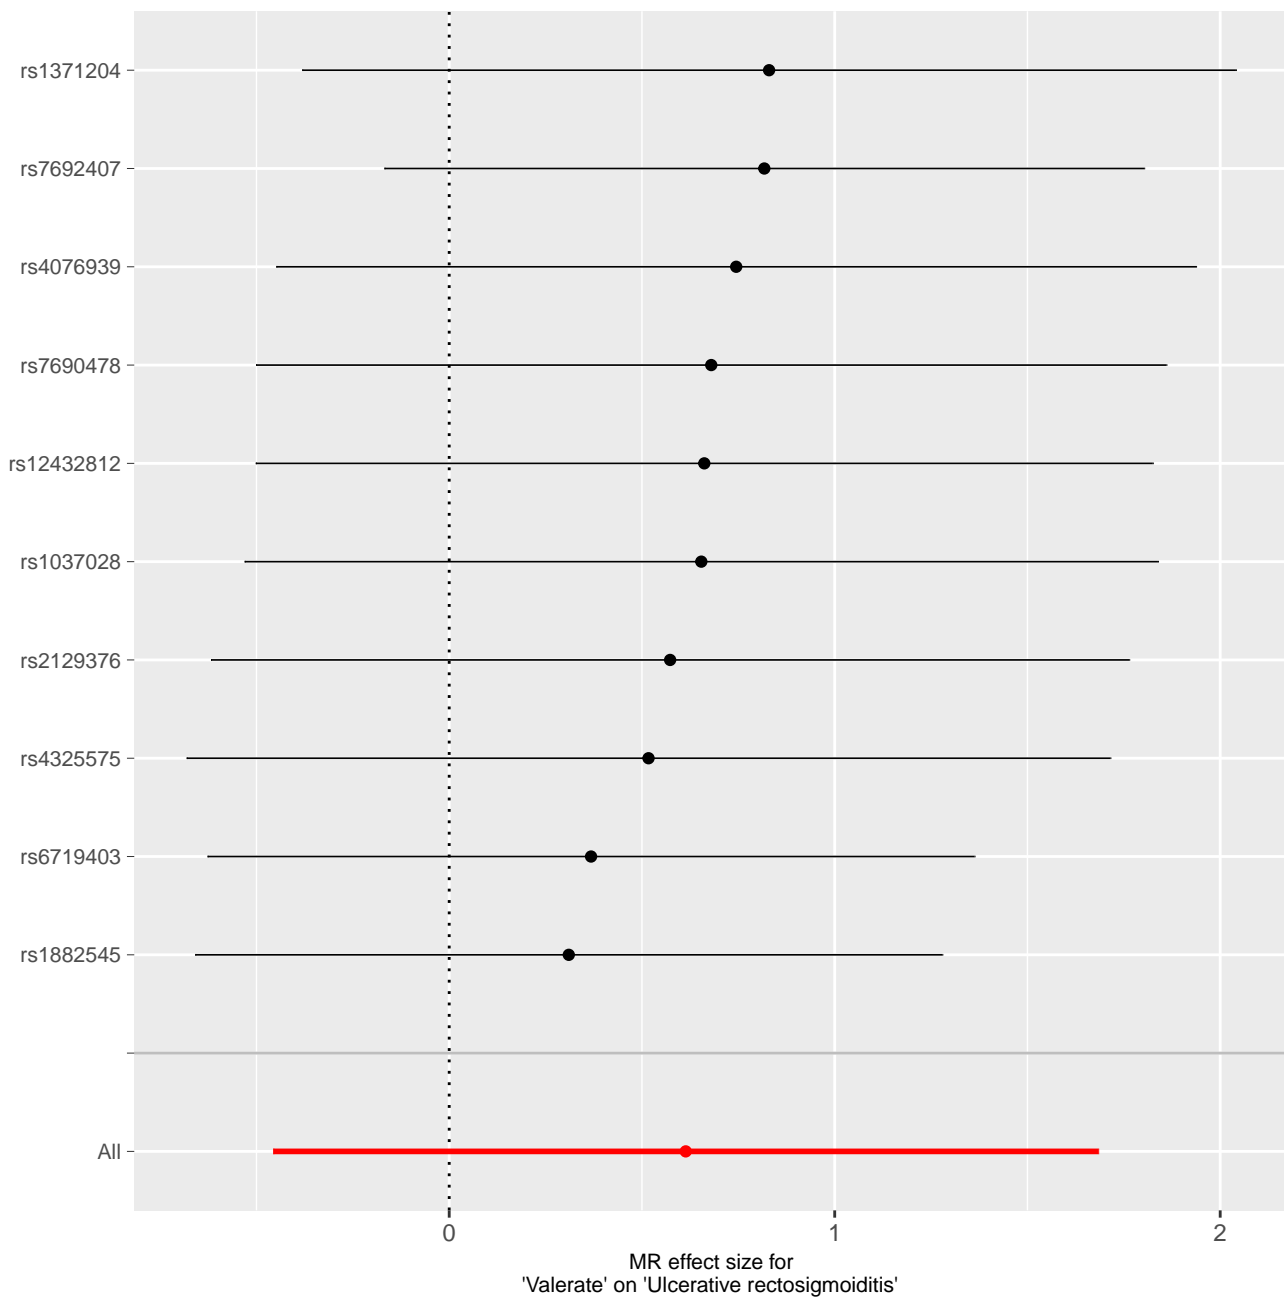

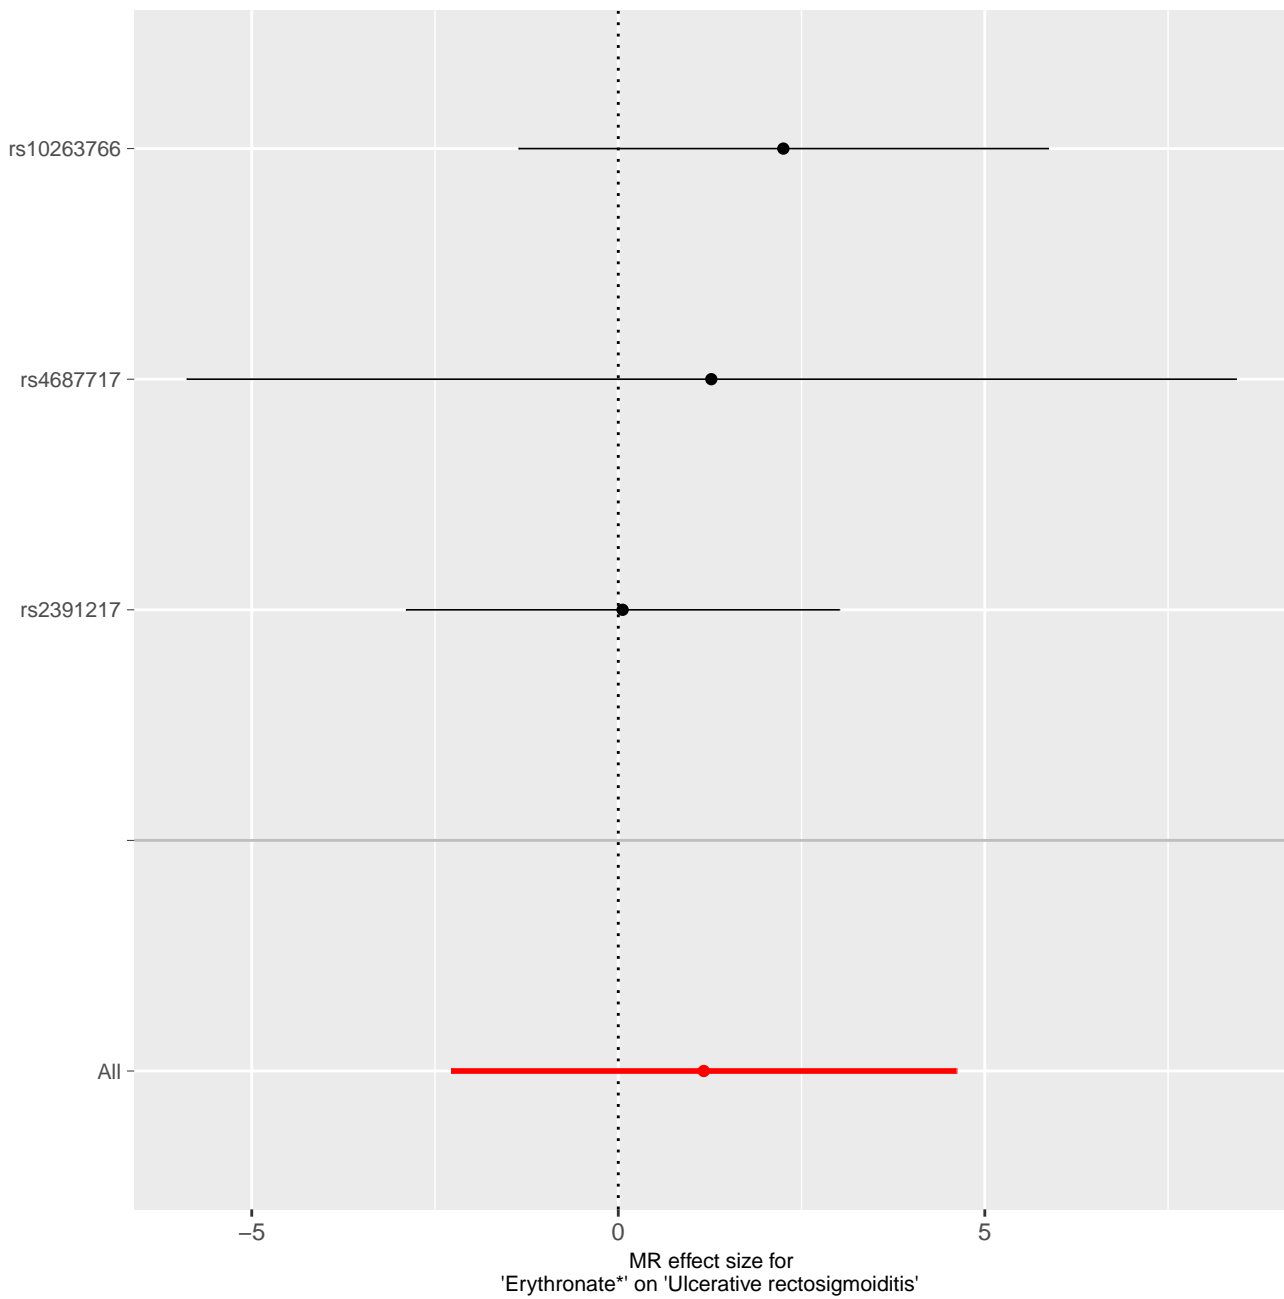

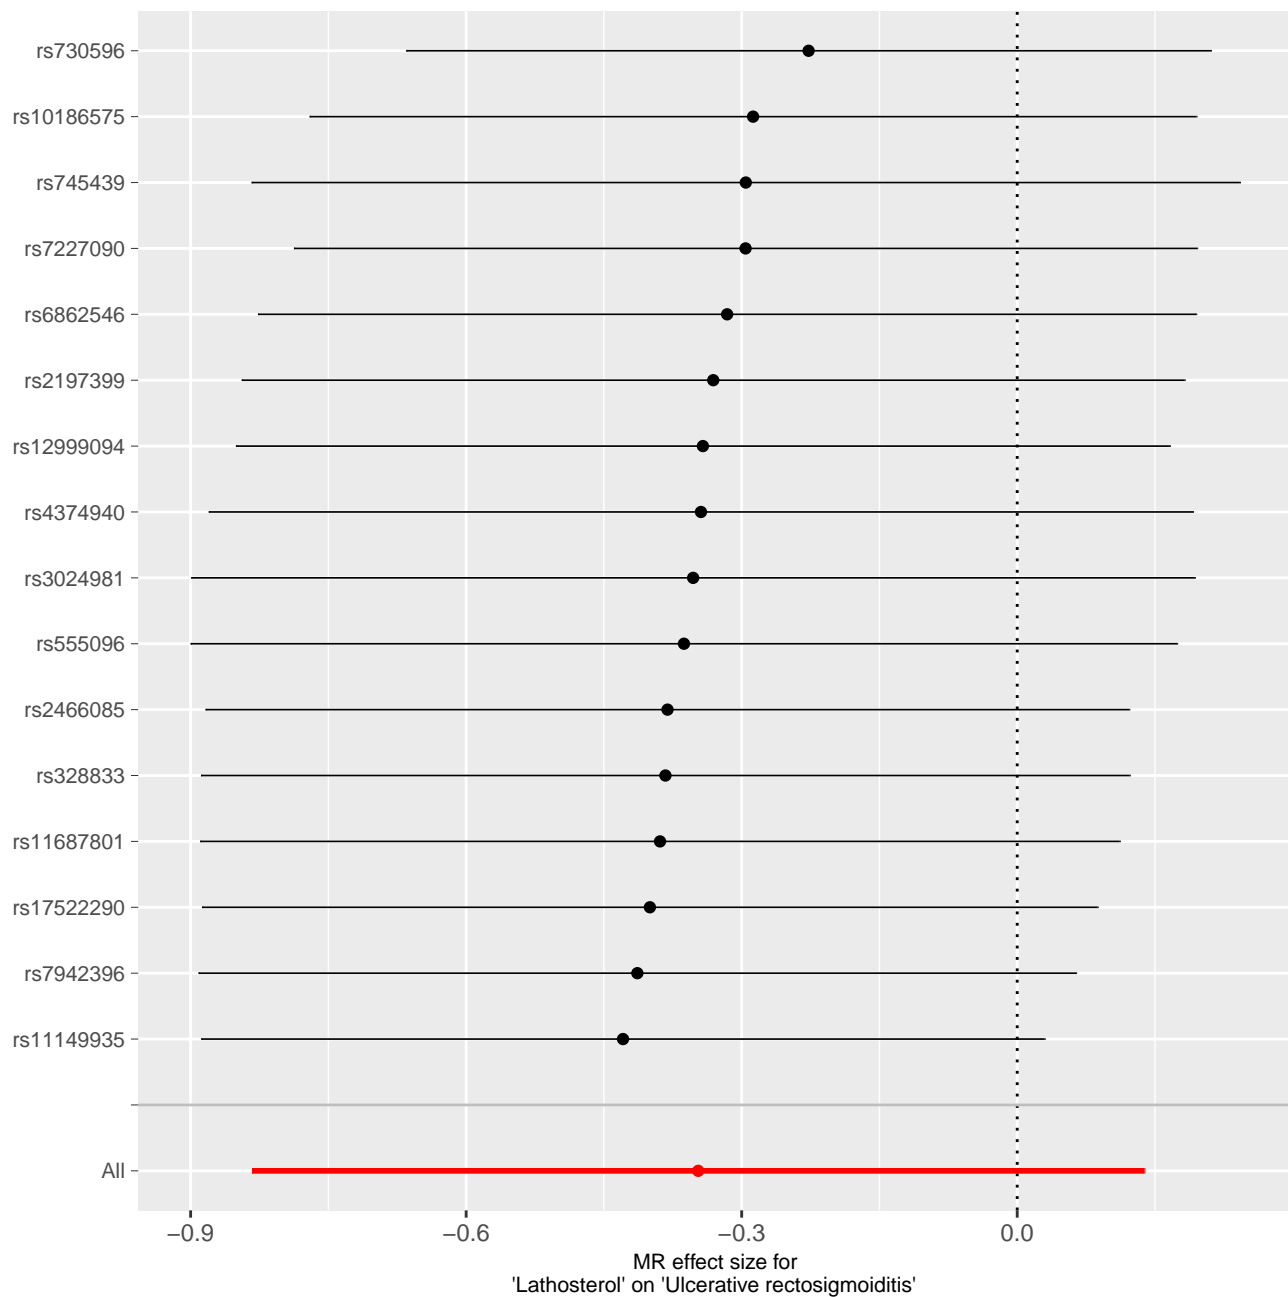

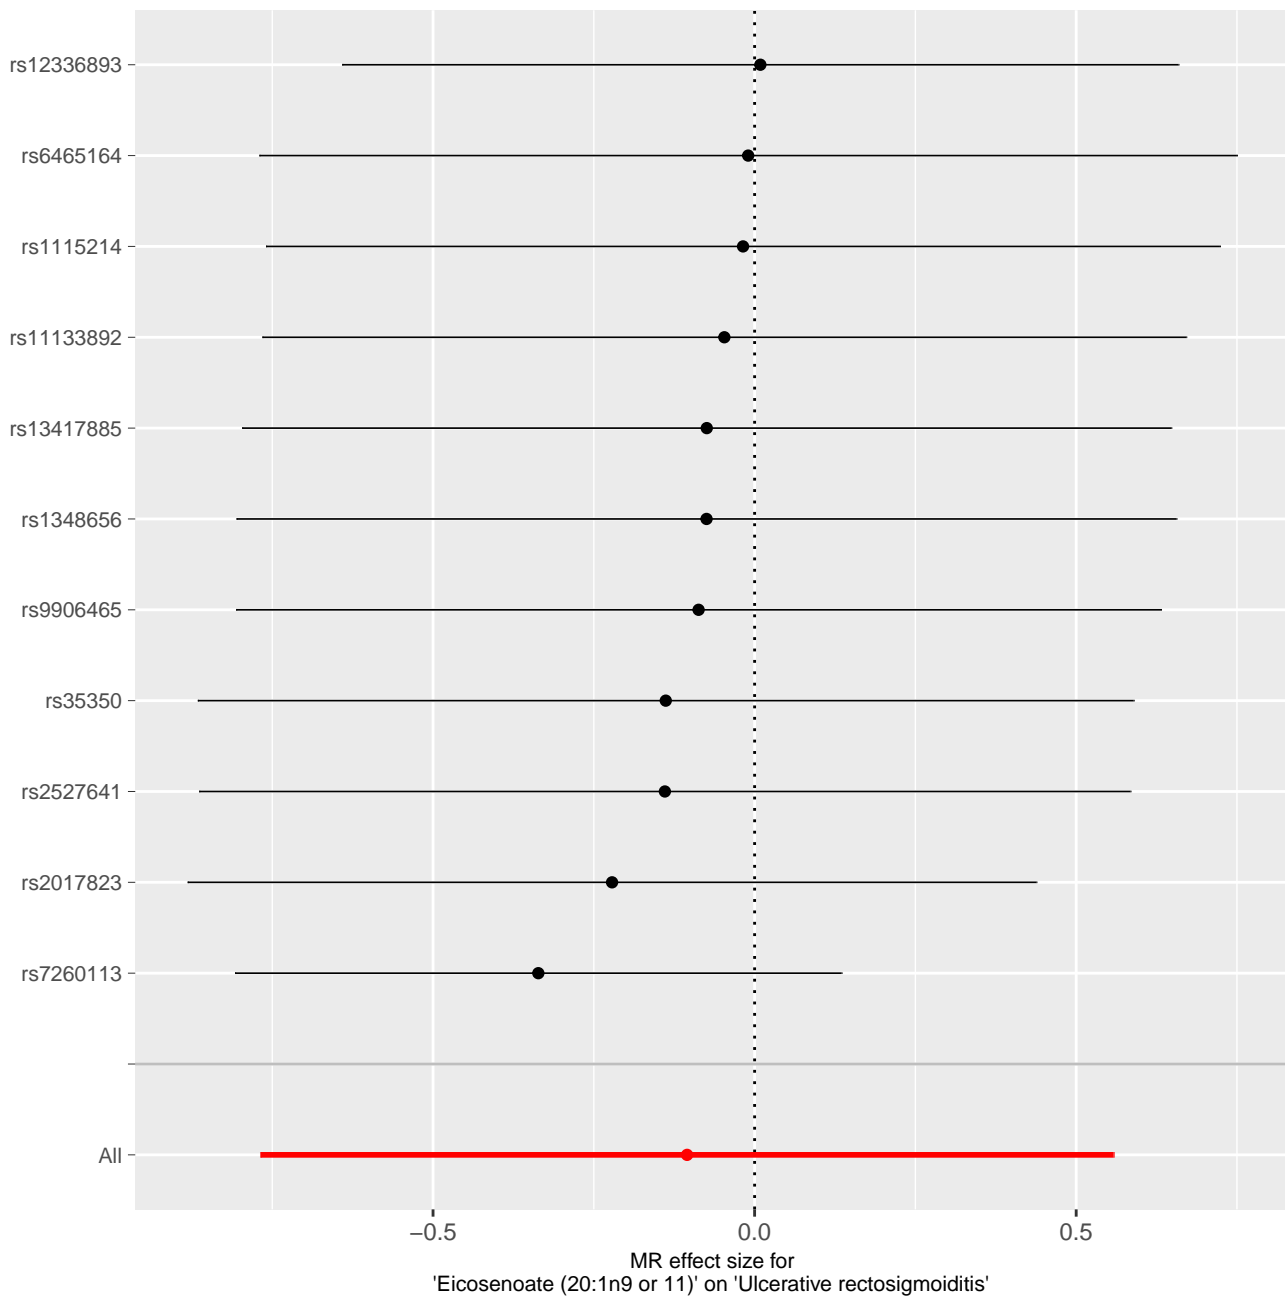

rs7775554

rs8002180

rs6804368

All

MR effect size for  
'X-12244--N-acetylcarnosine' on 'Ulcerative rectosigmoiditis'

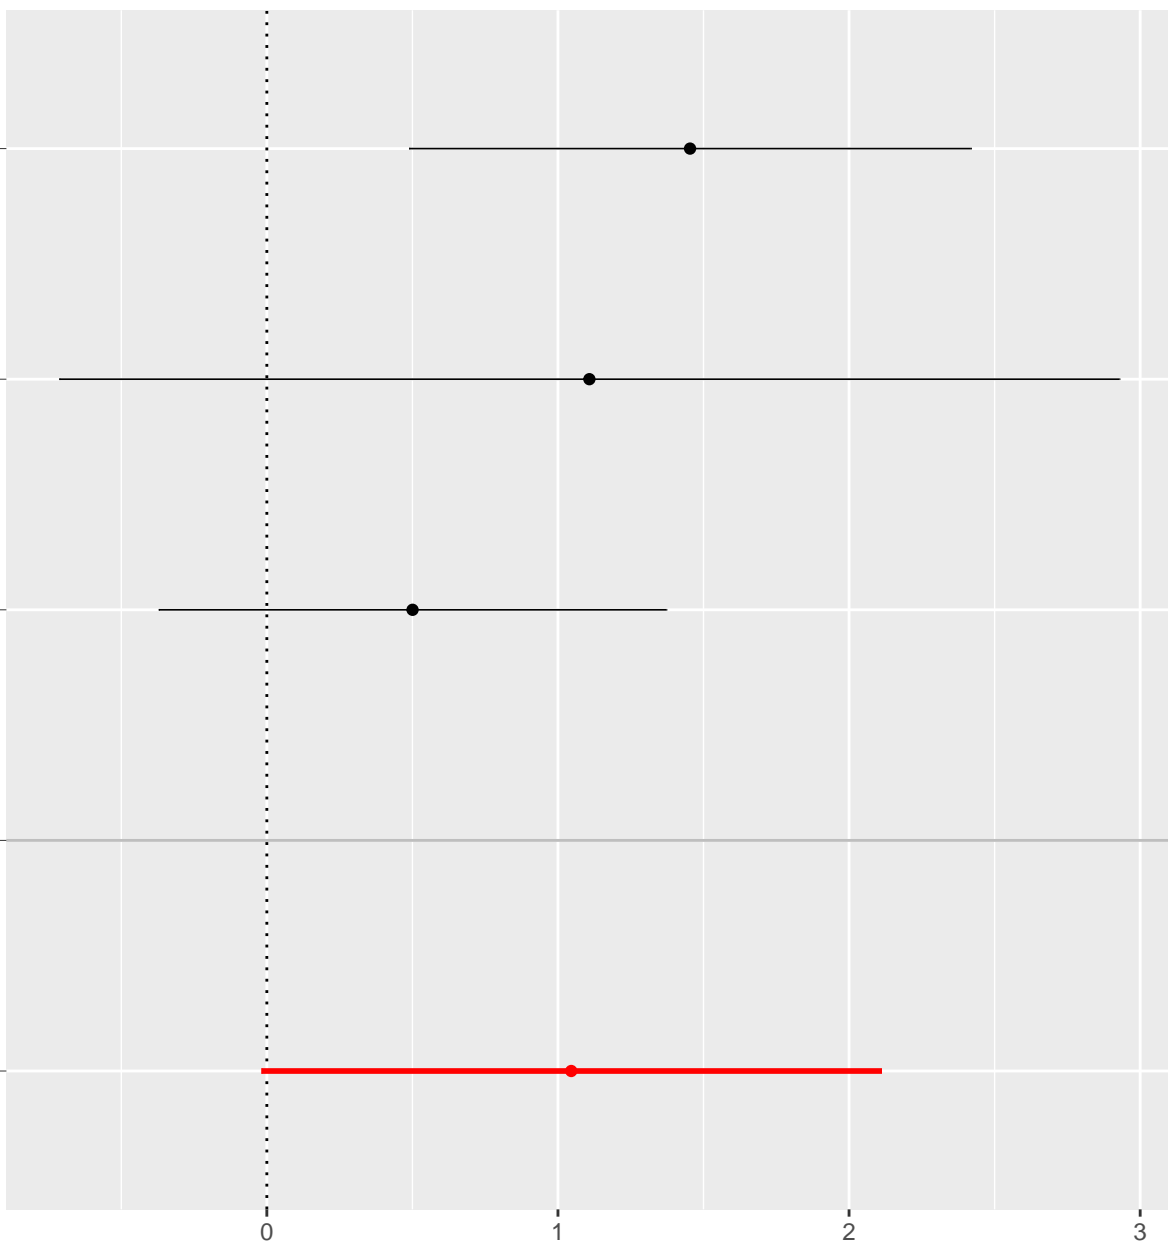



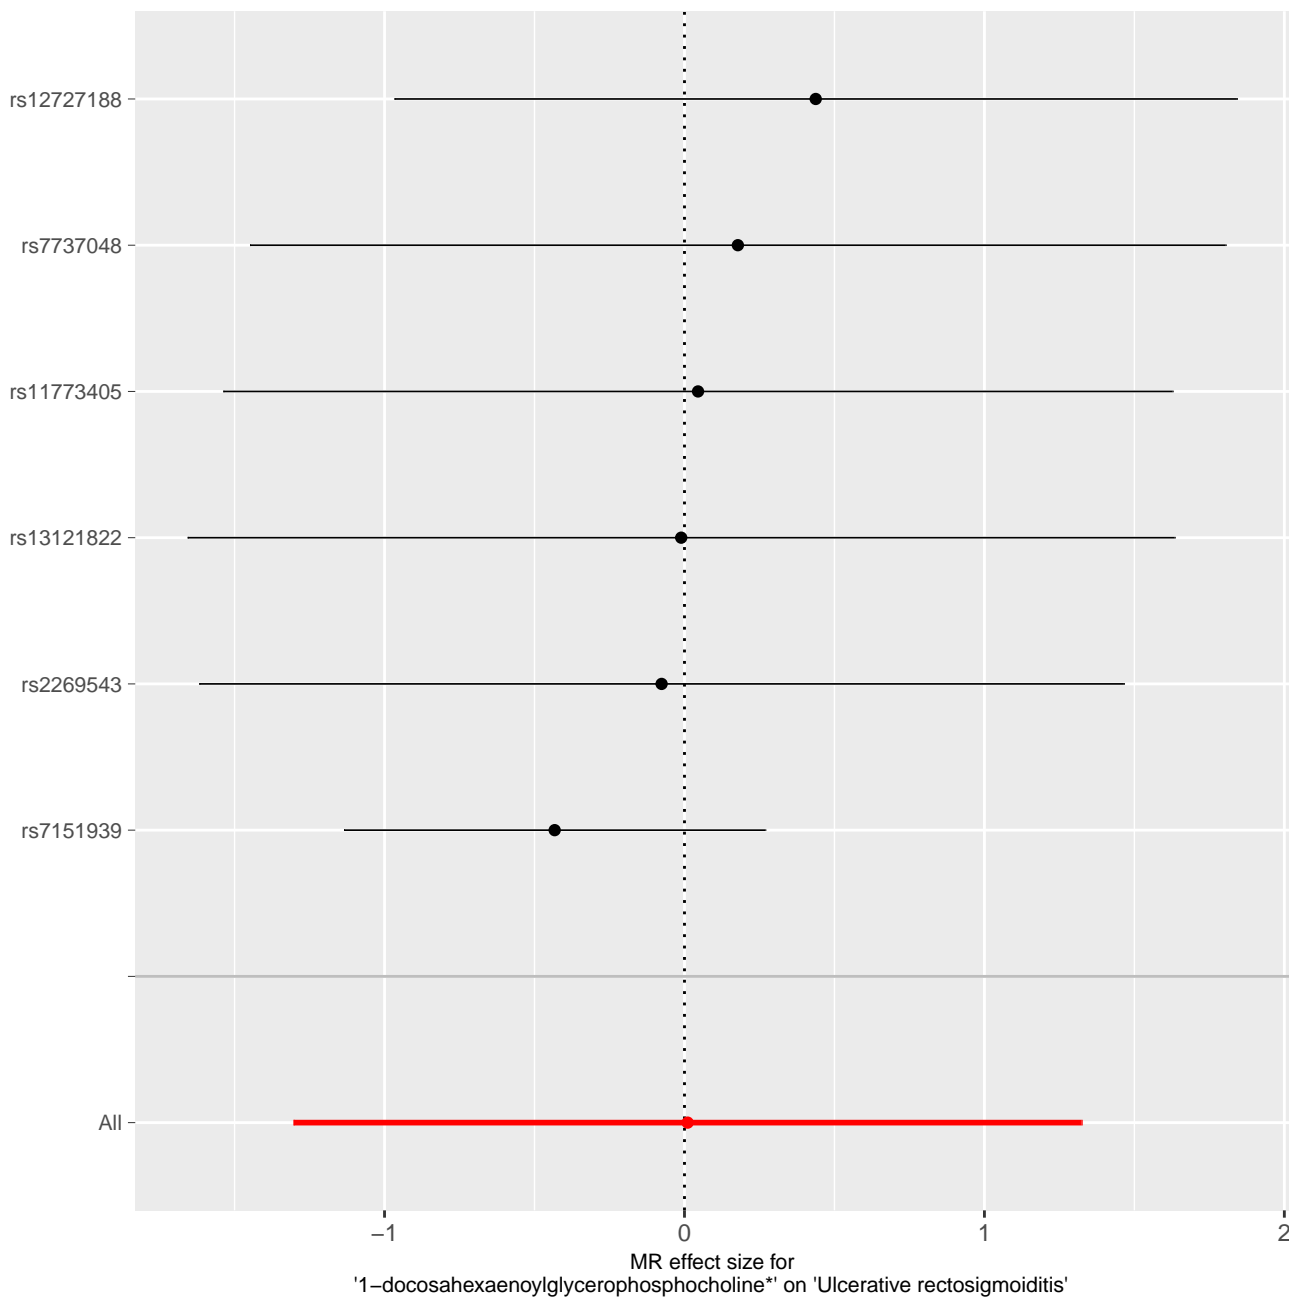

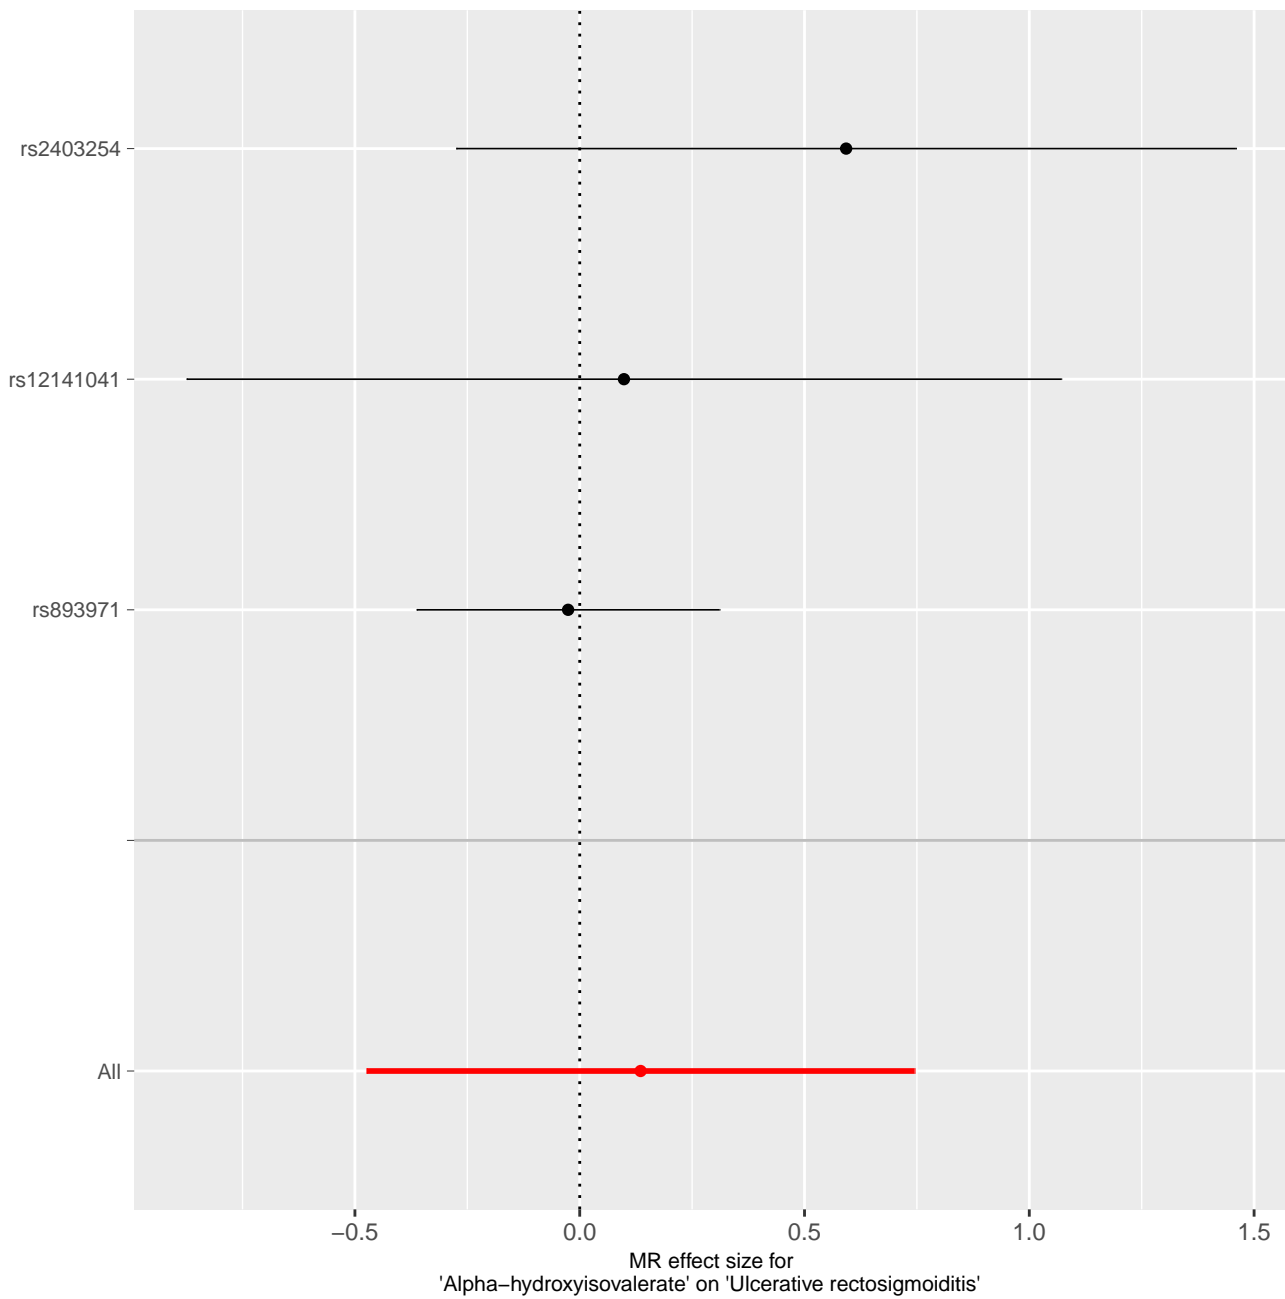

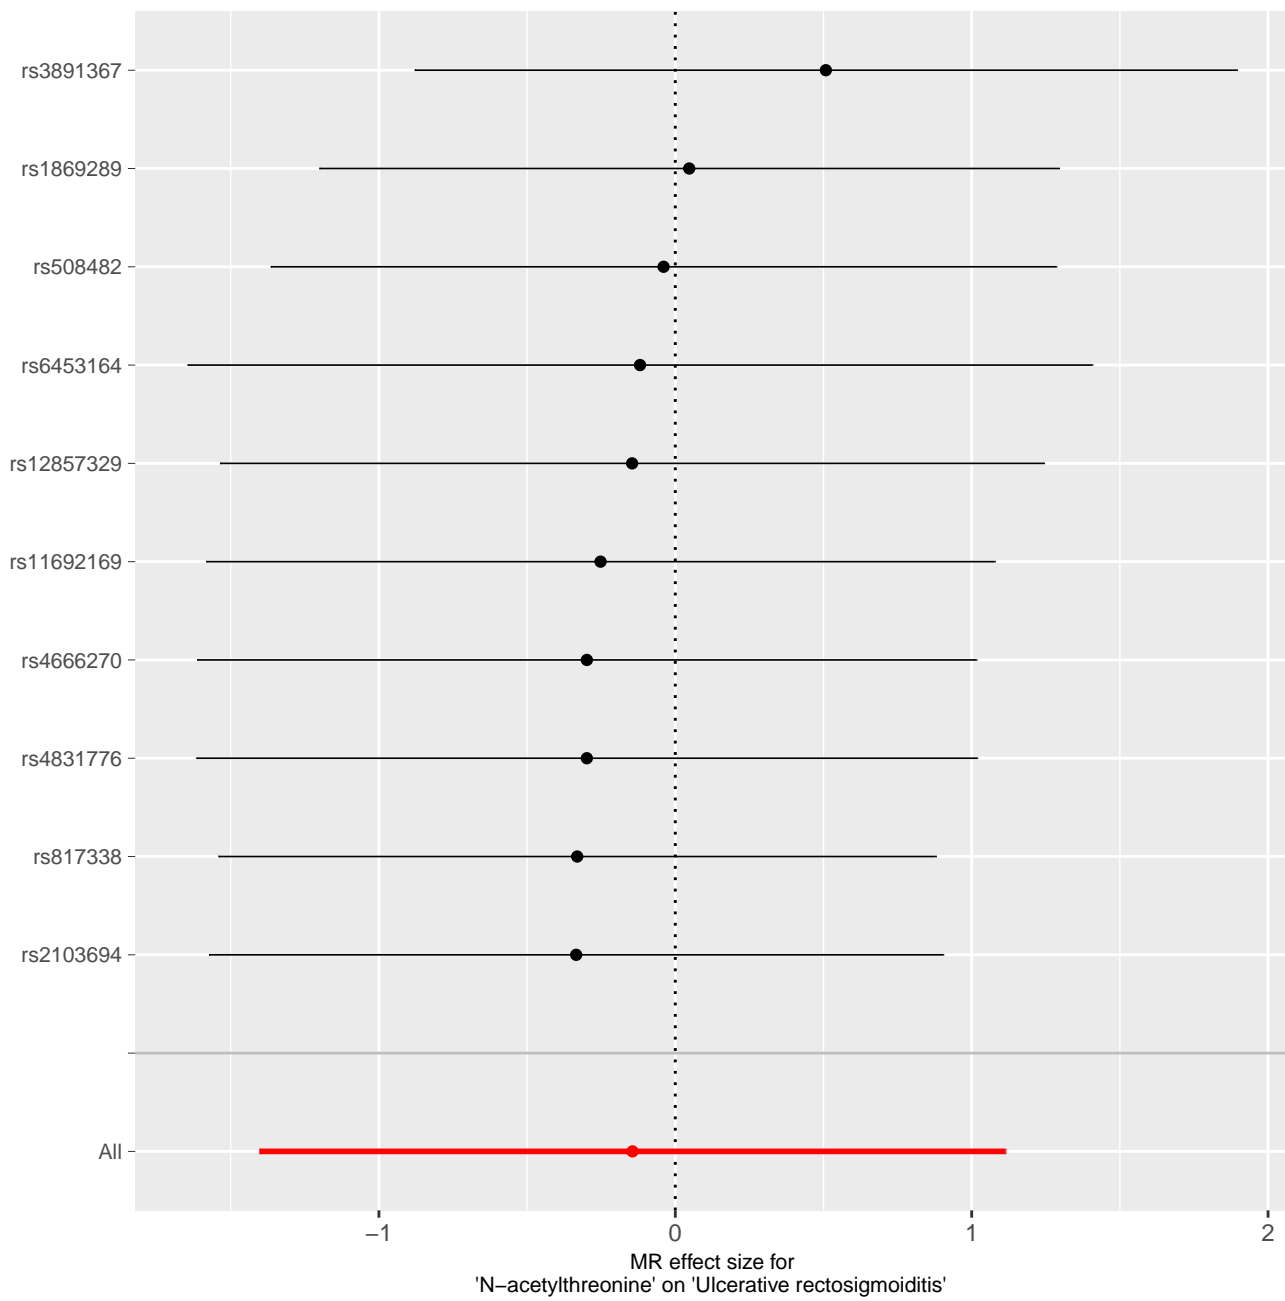

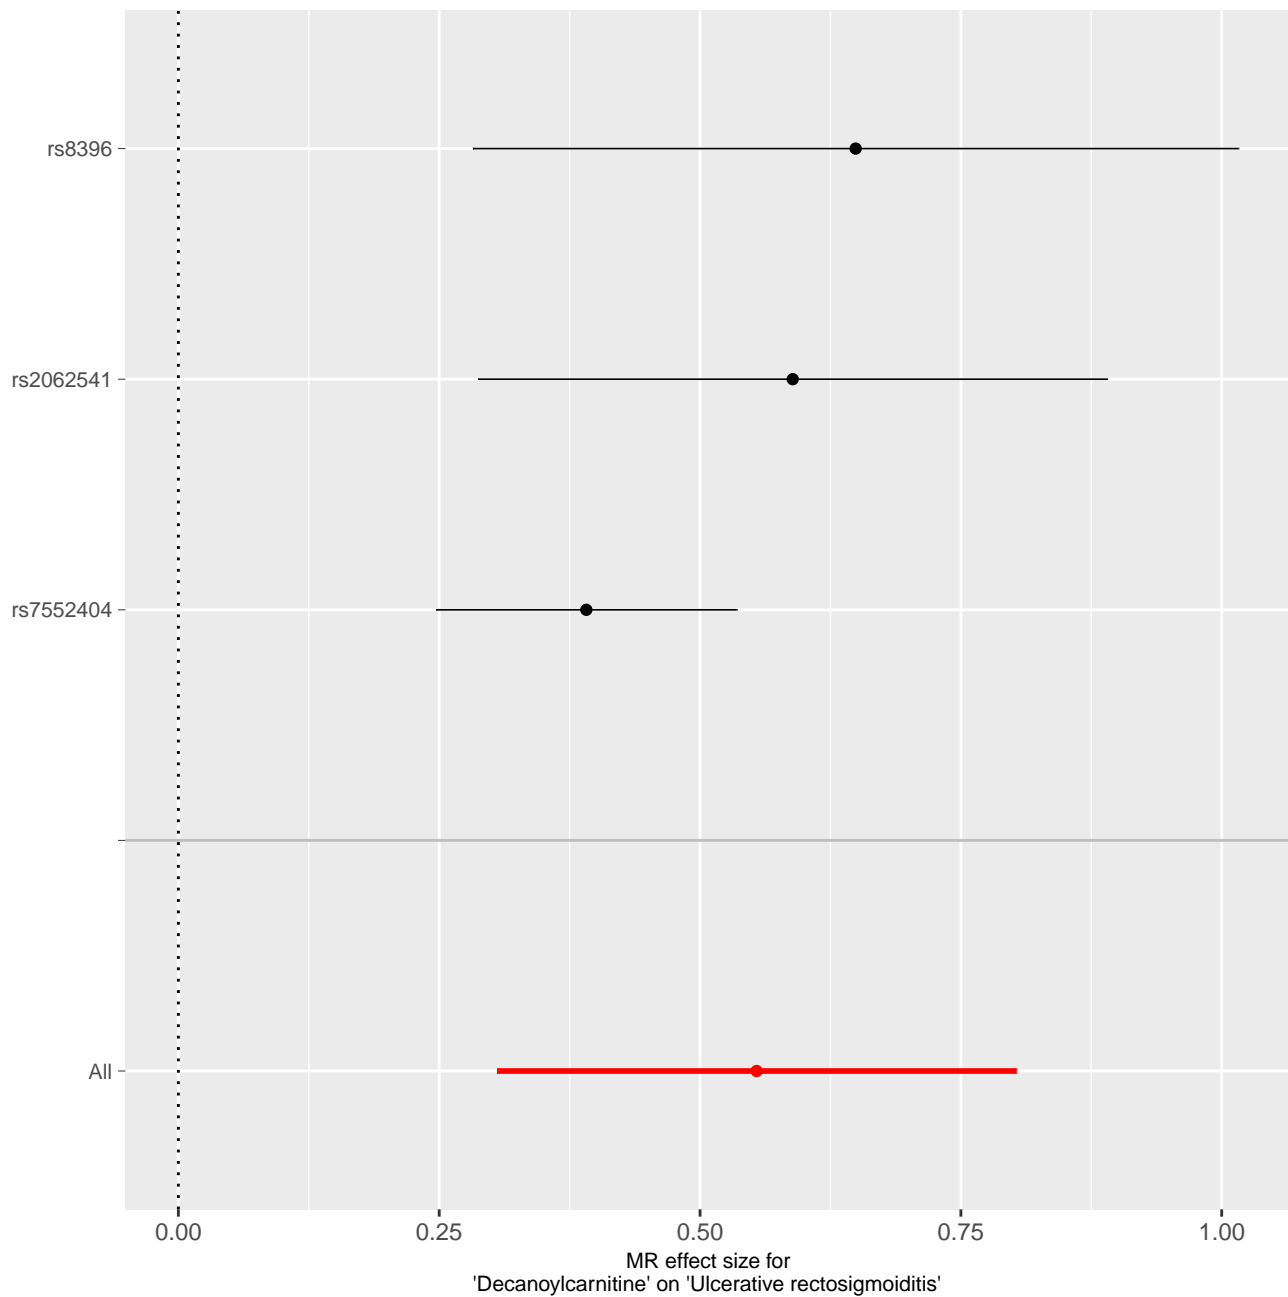

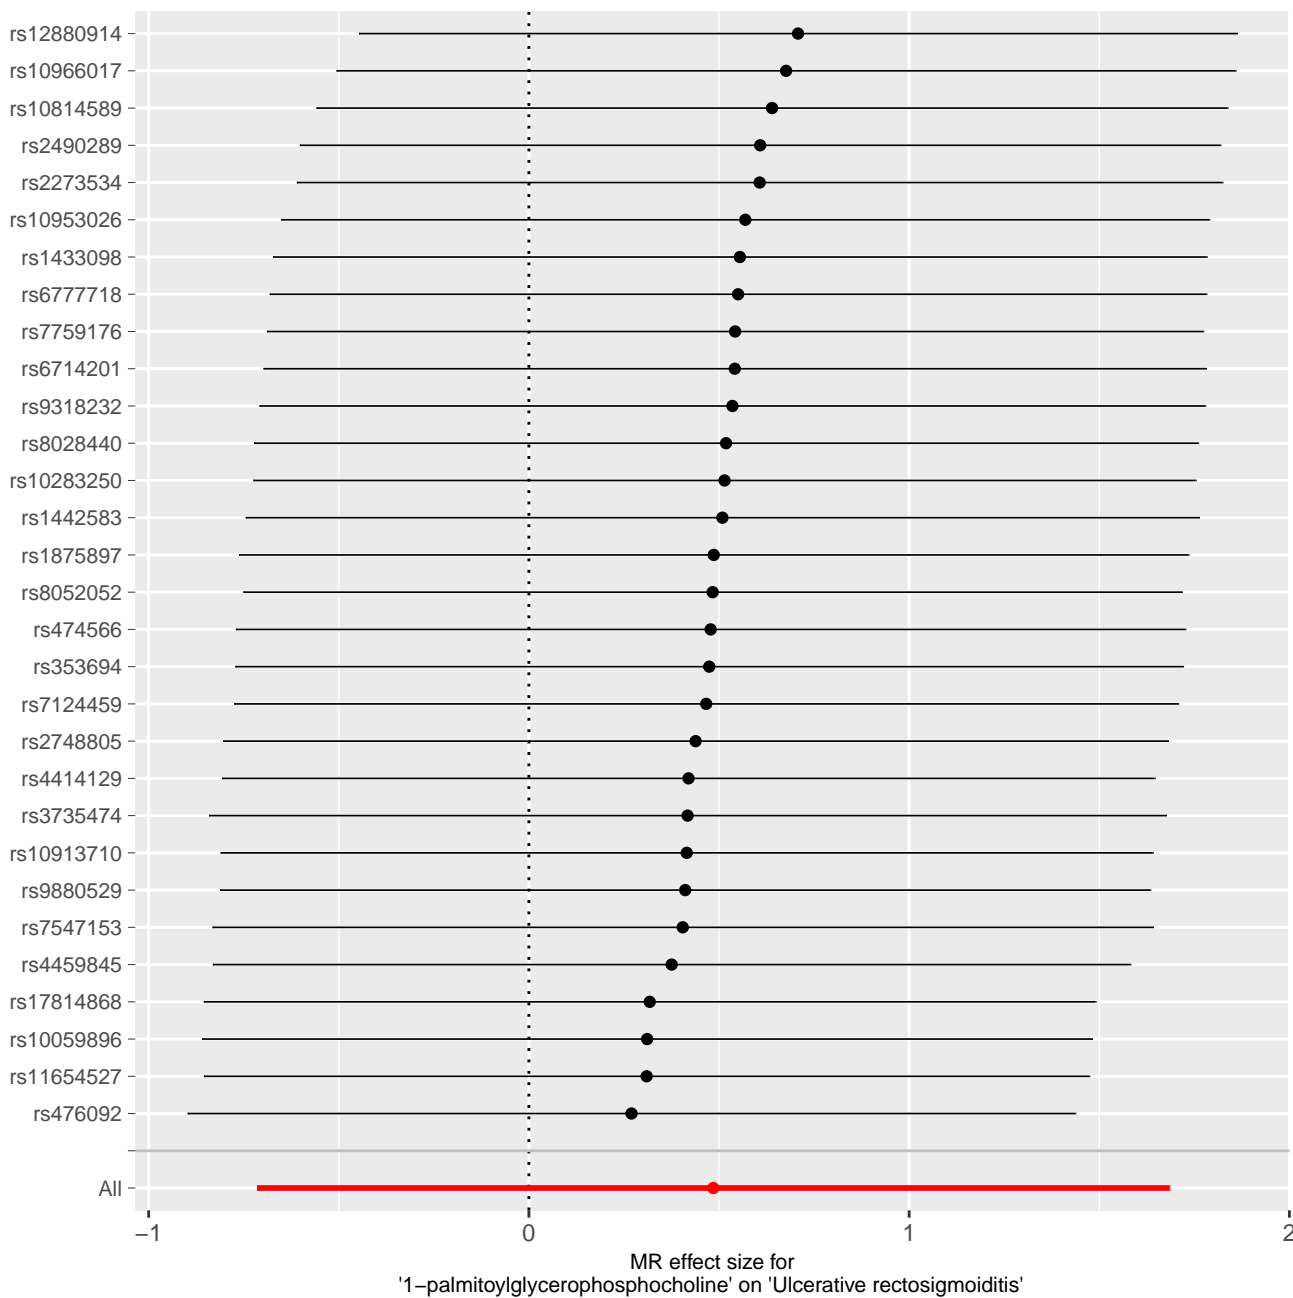

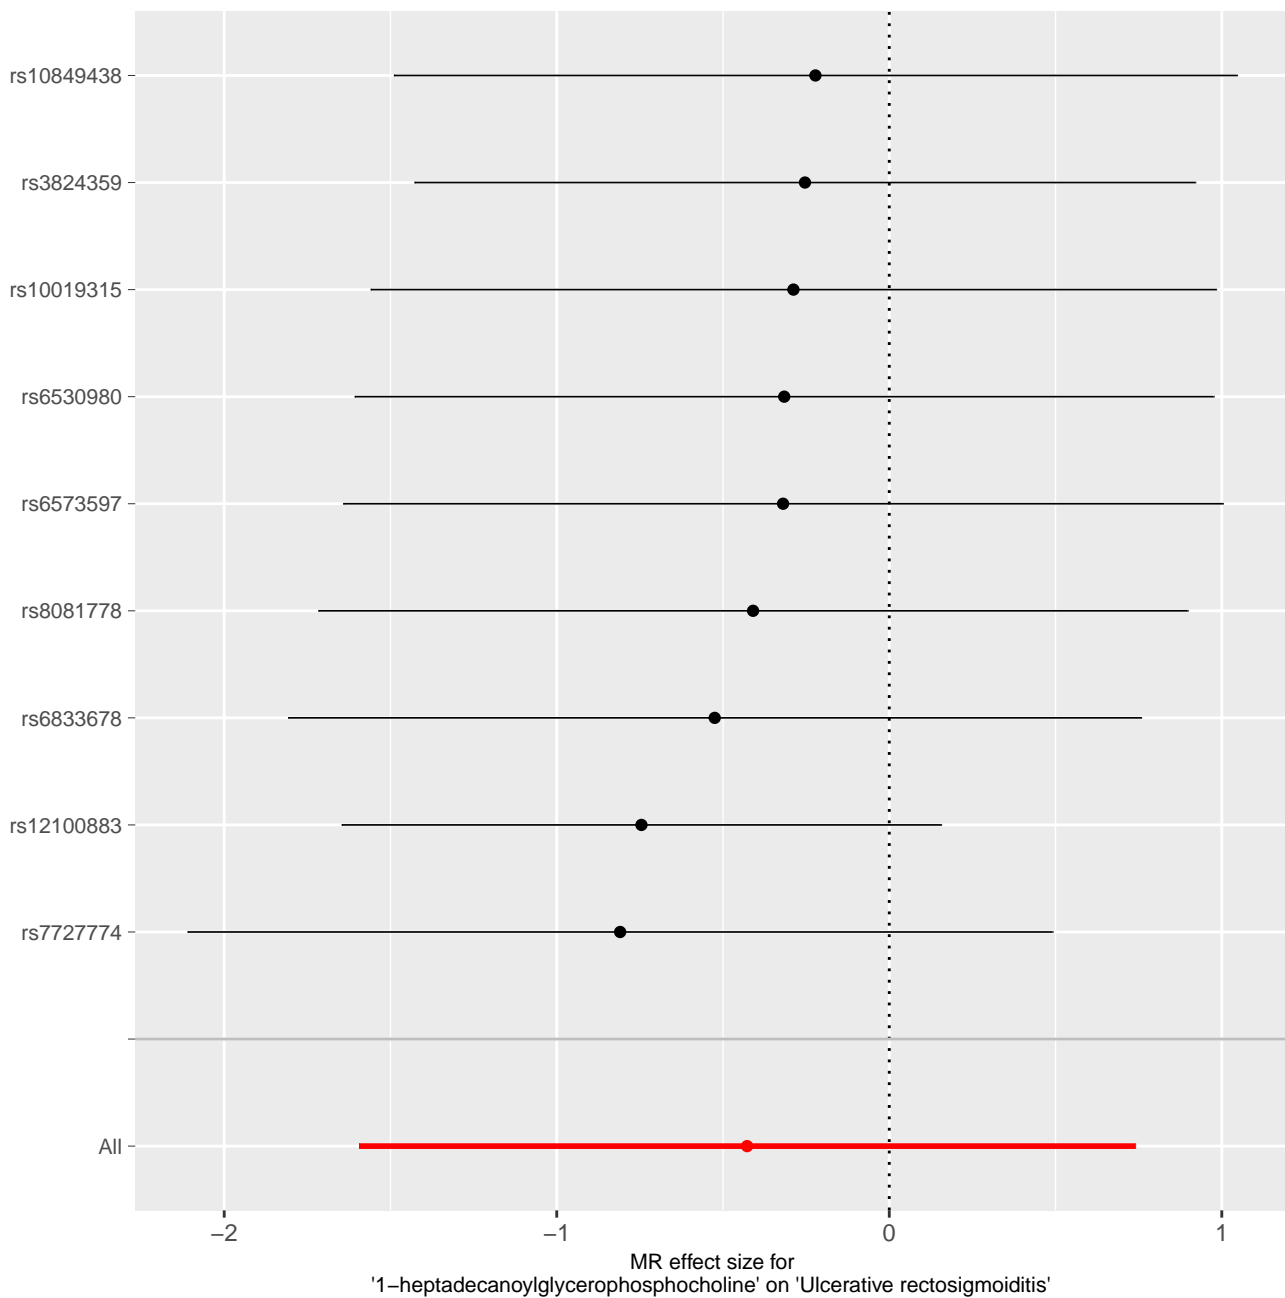

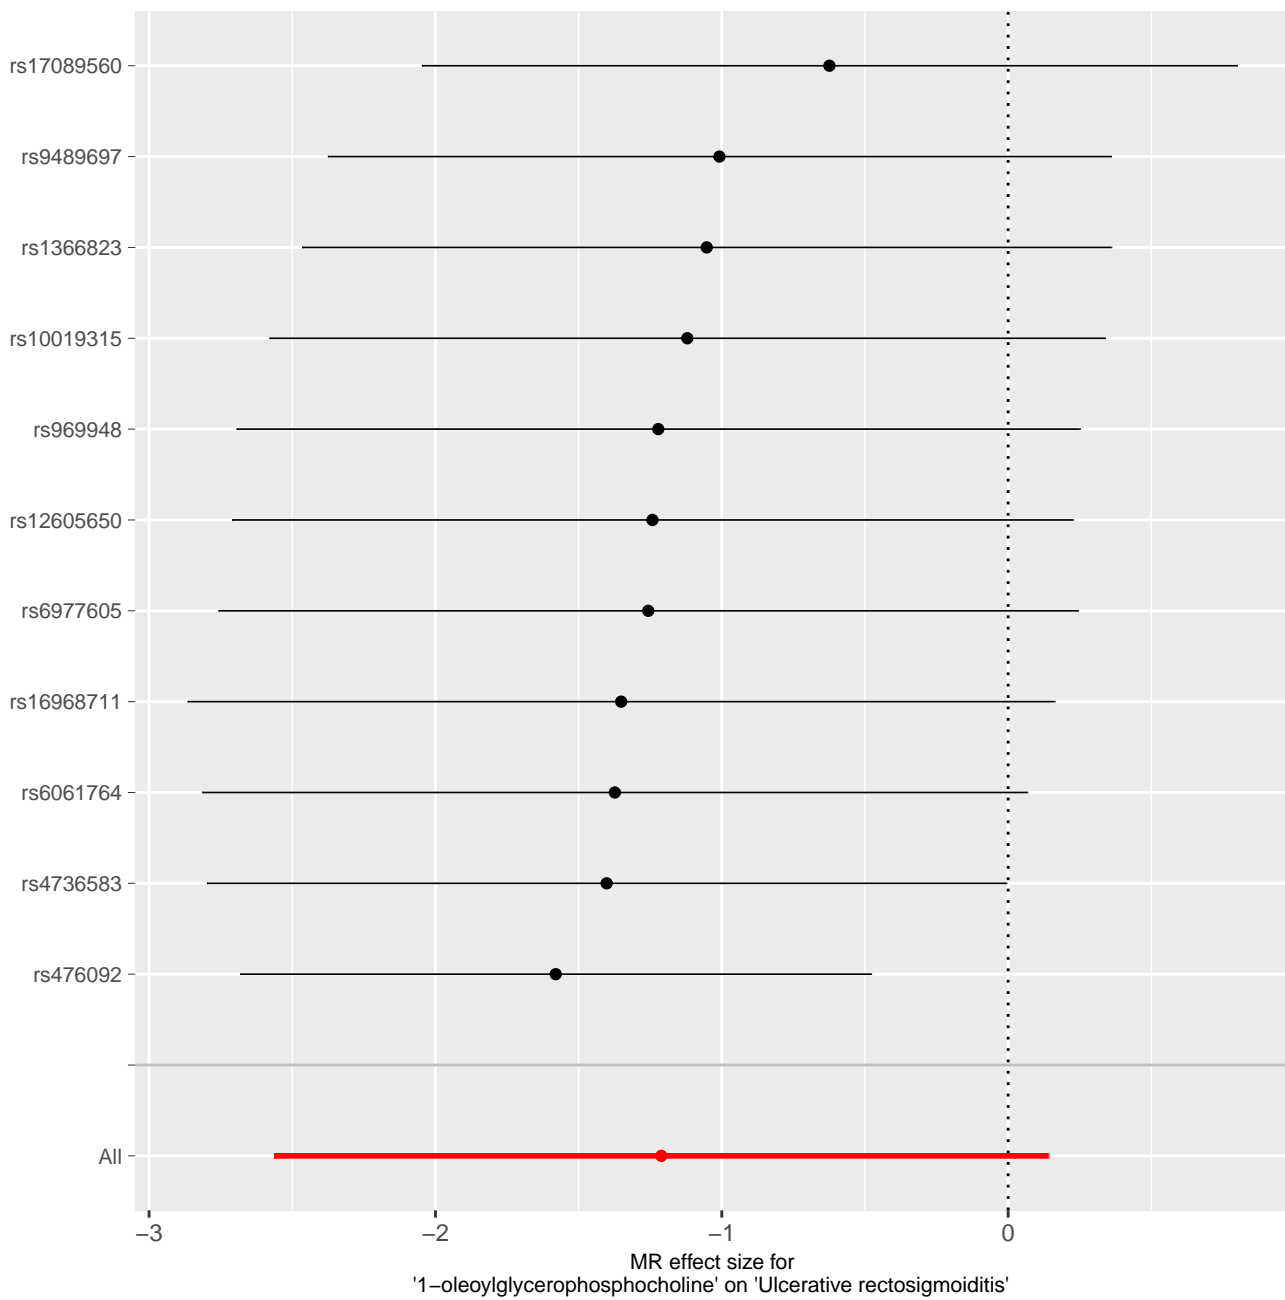

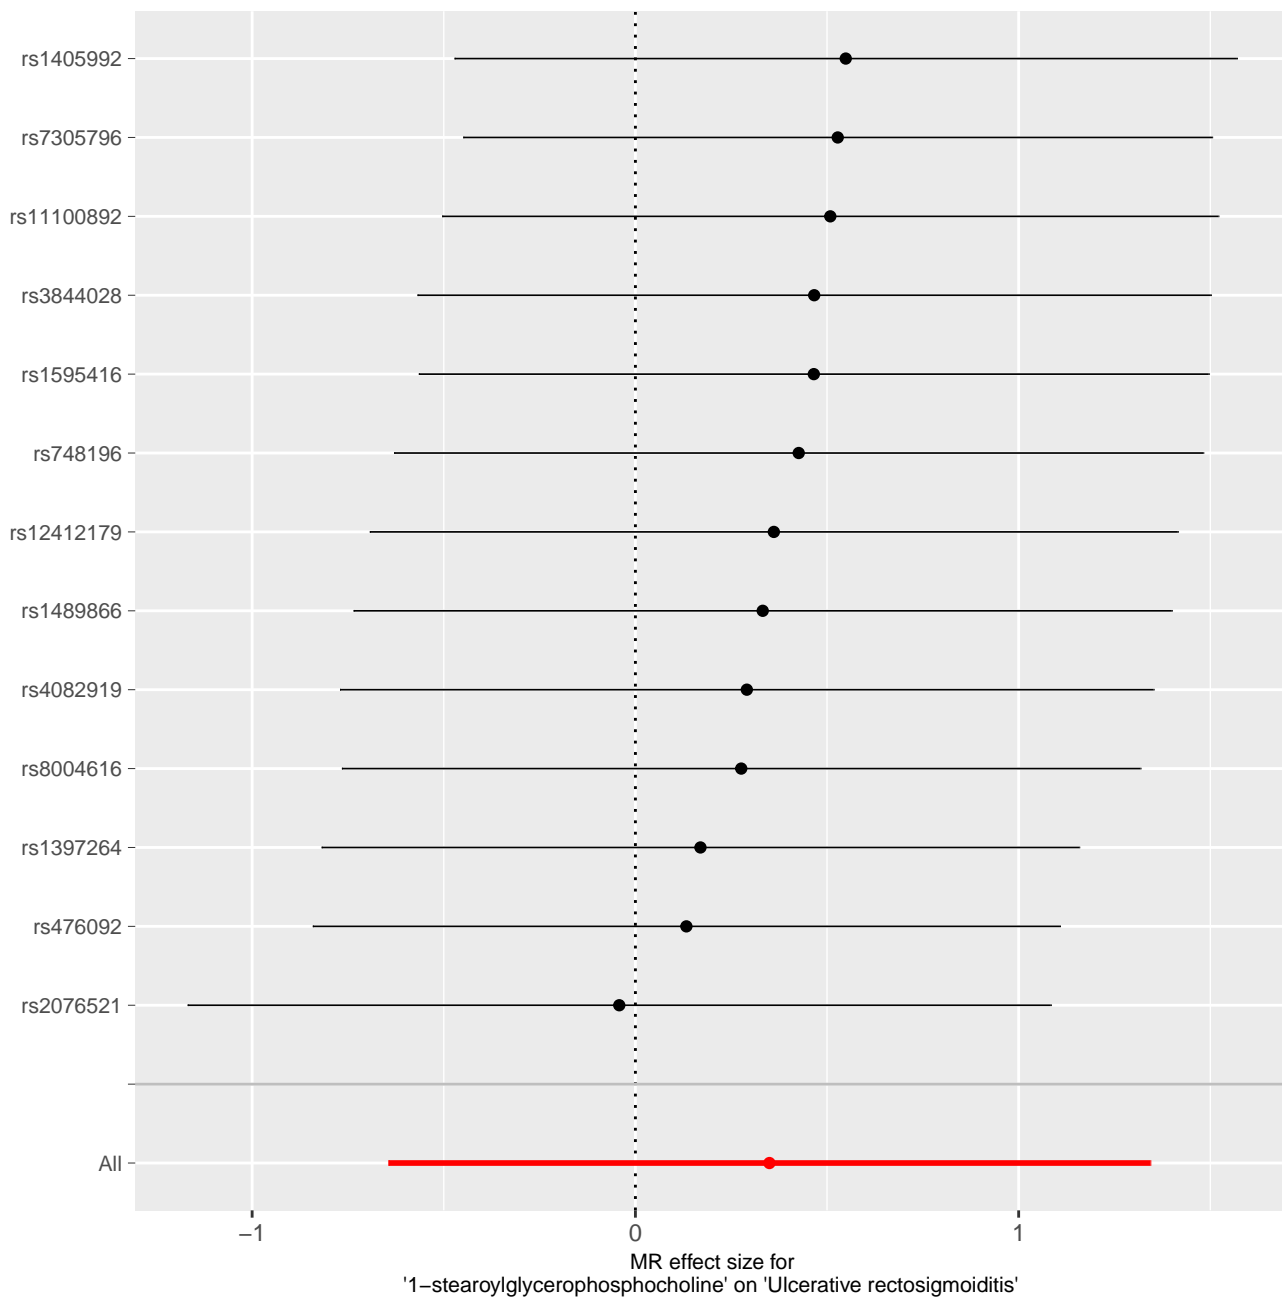



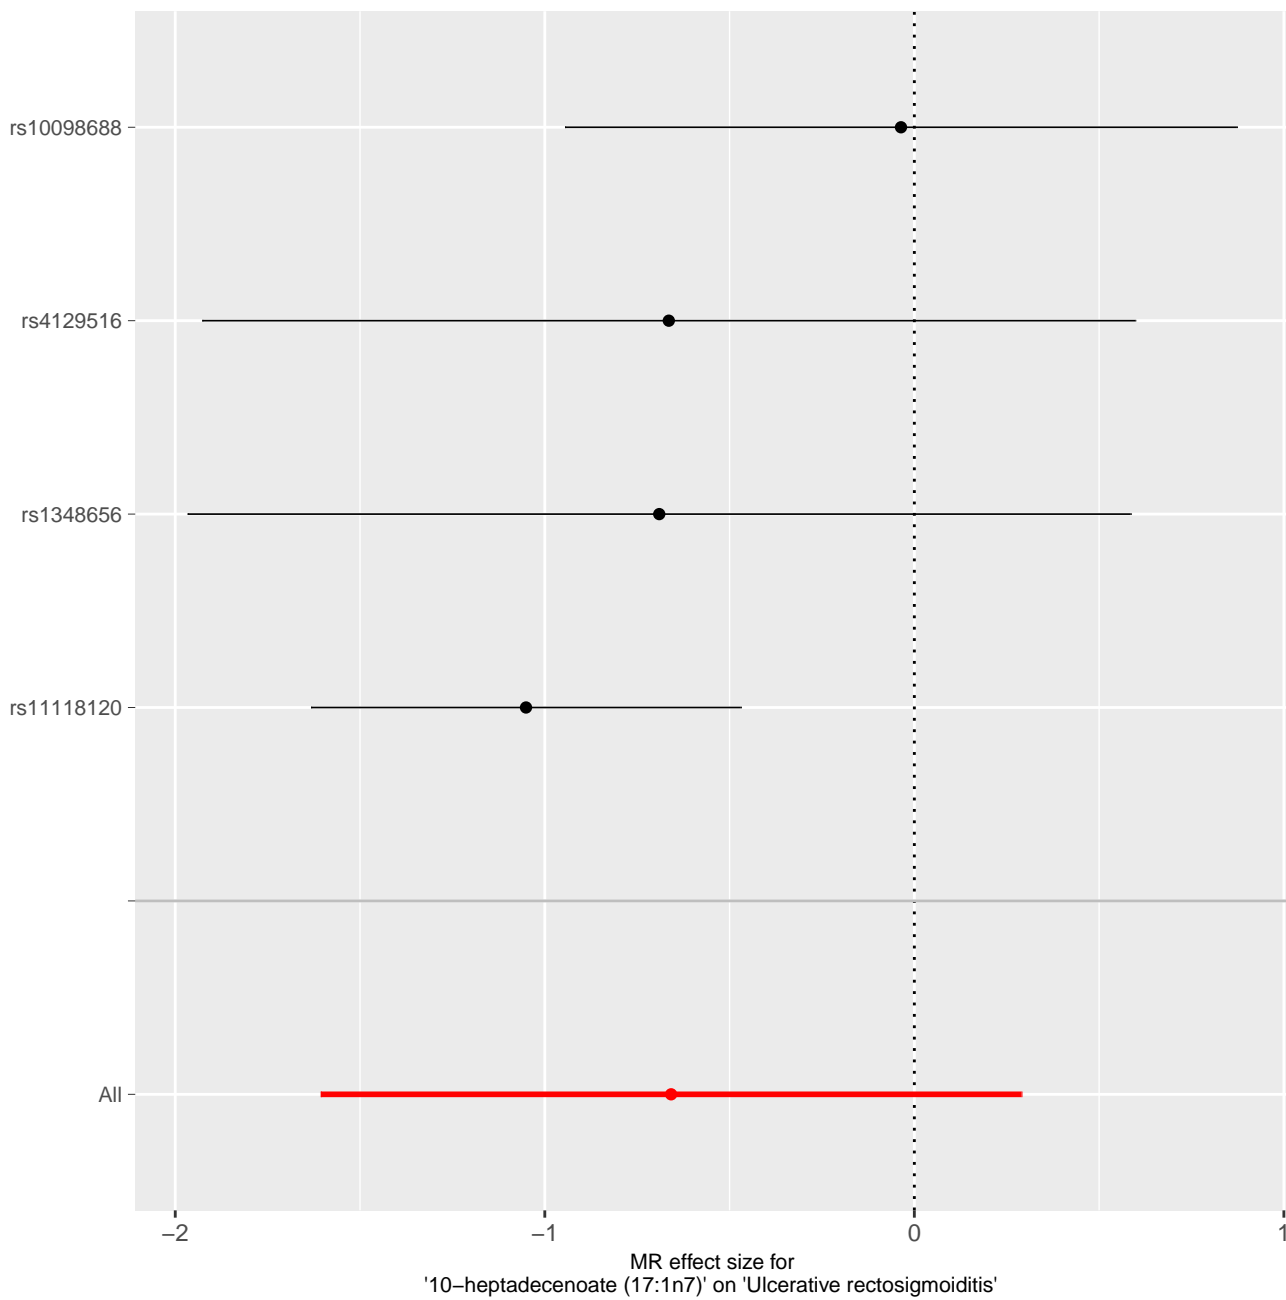

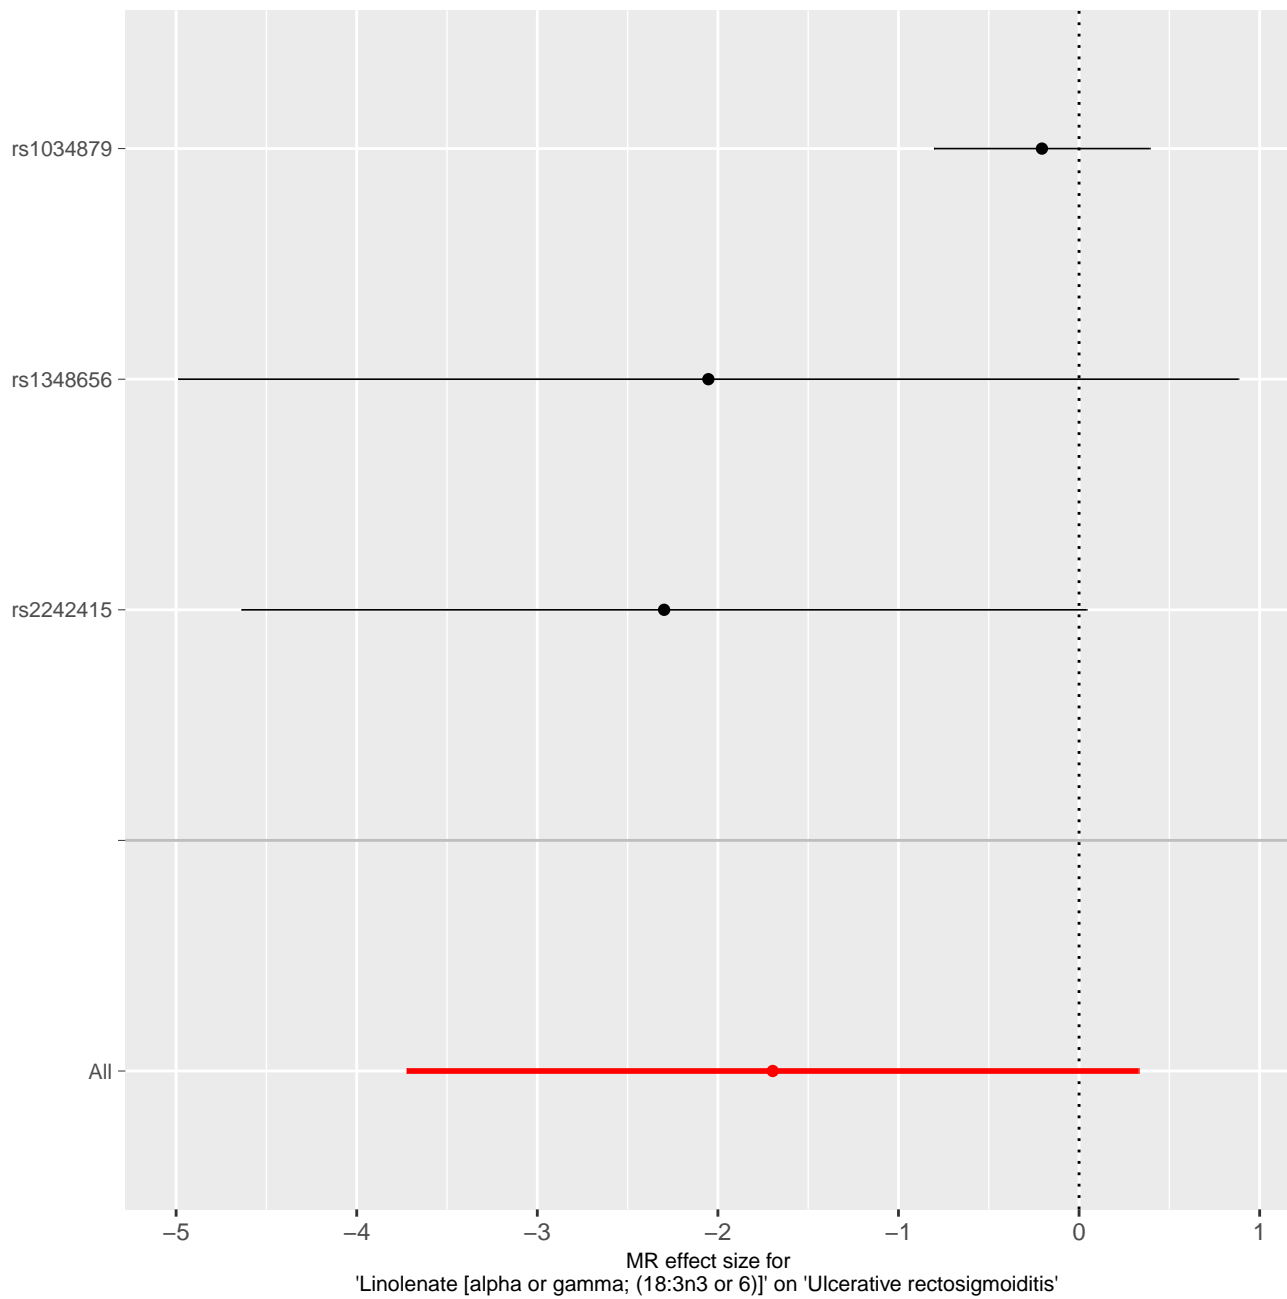

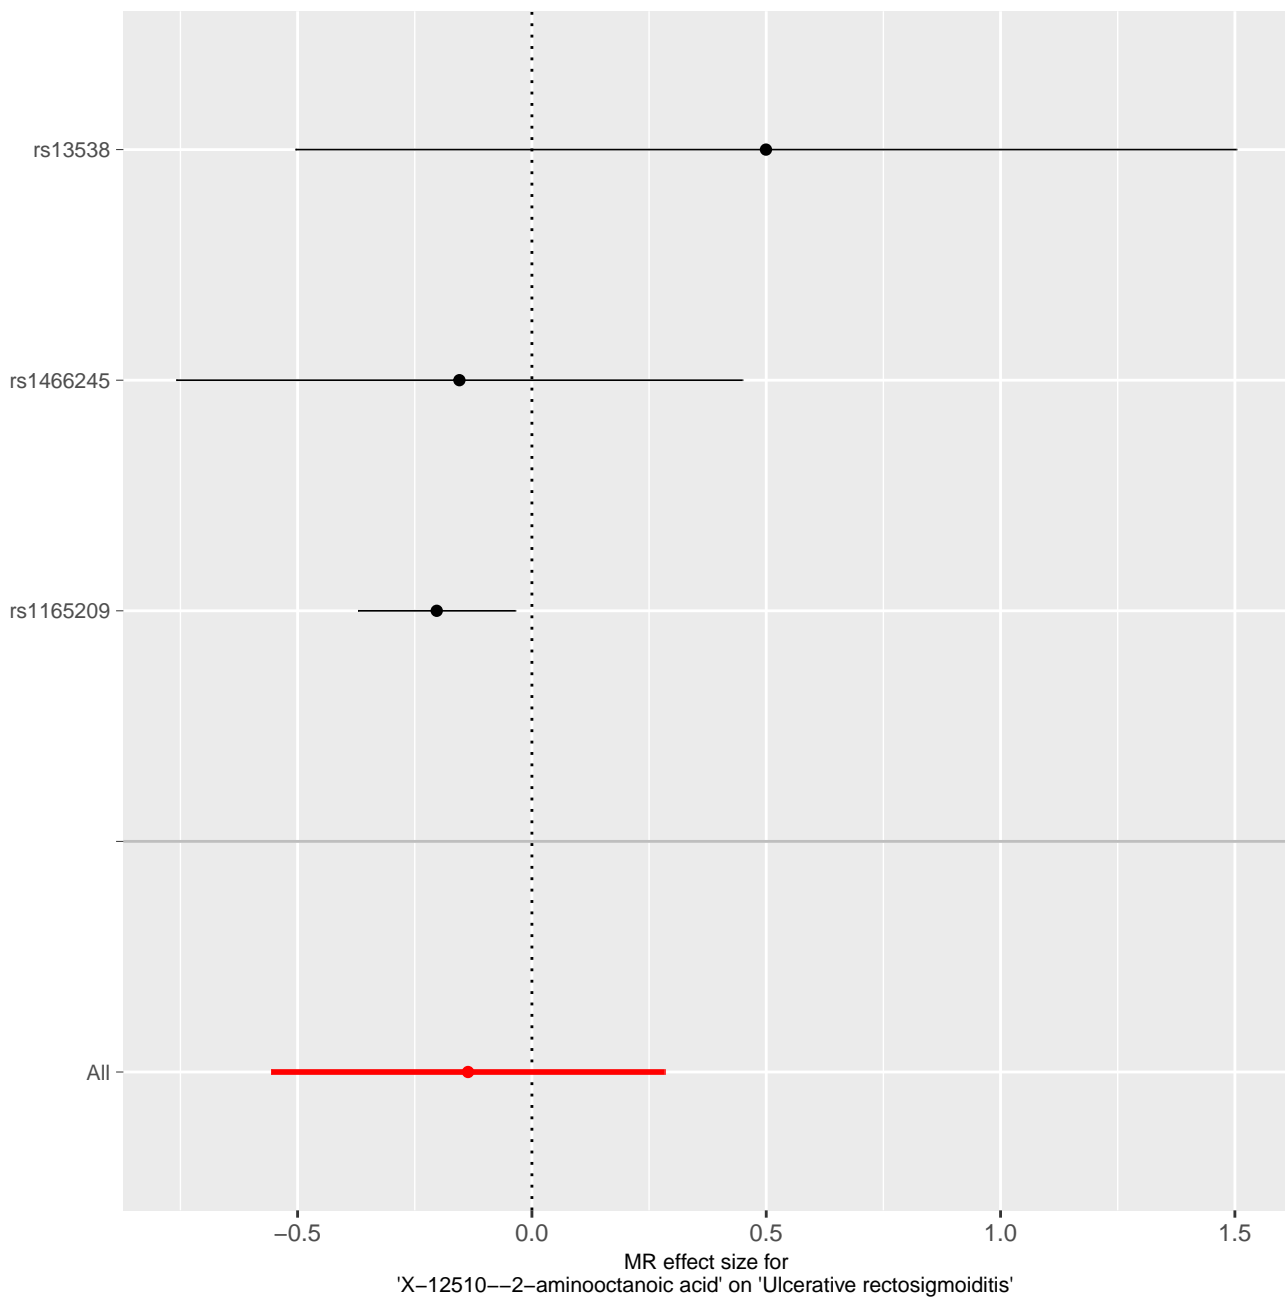

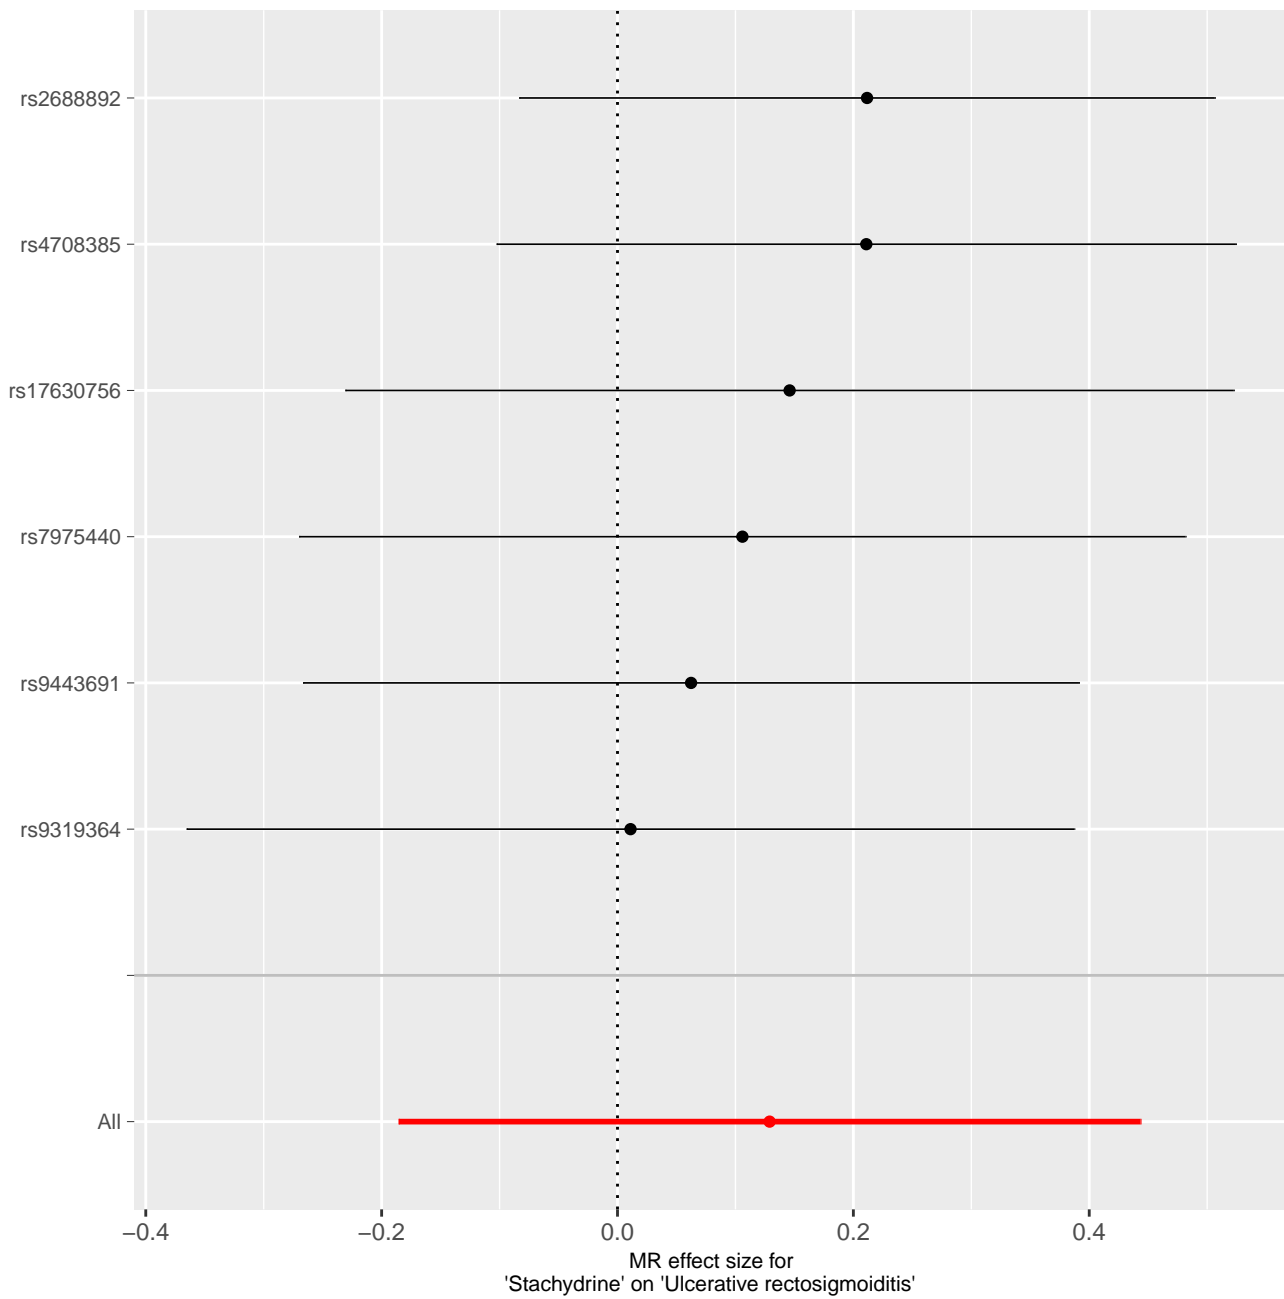

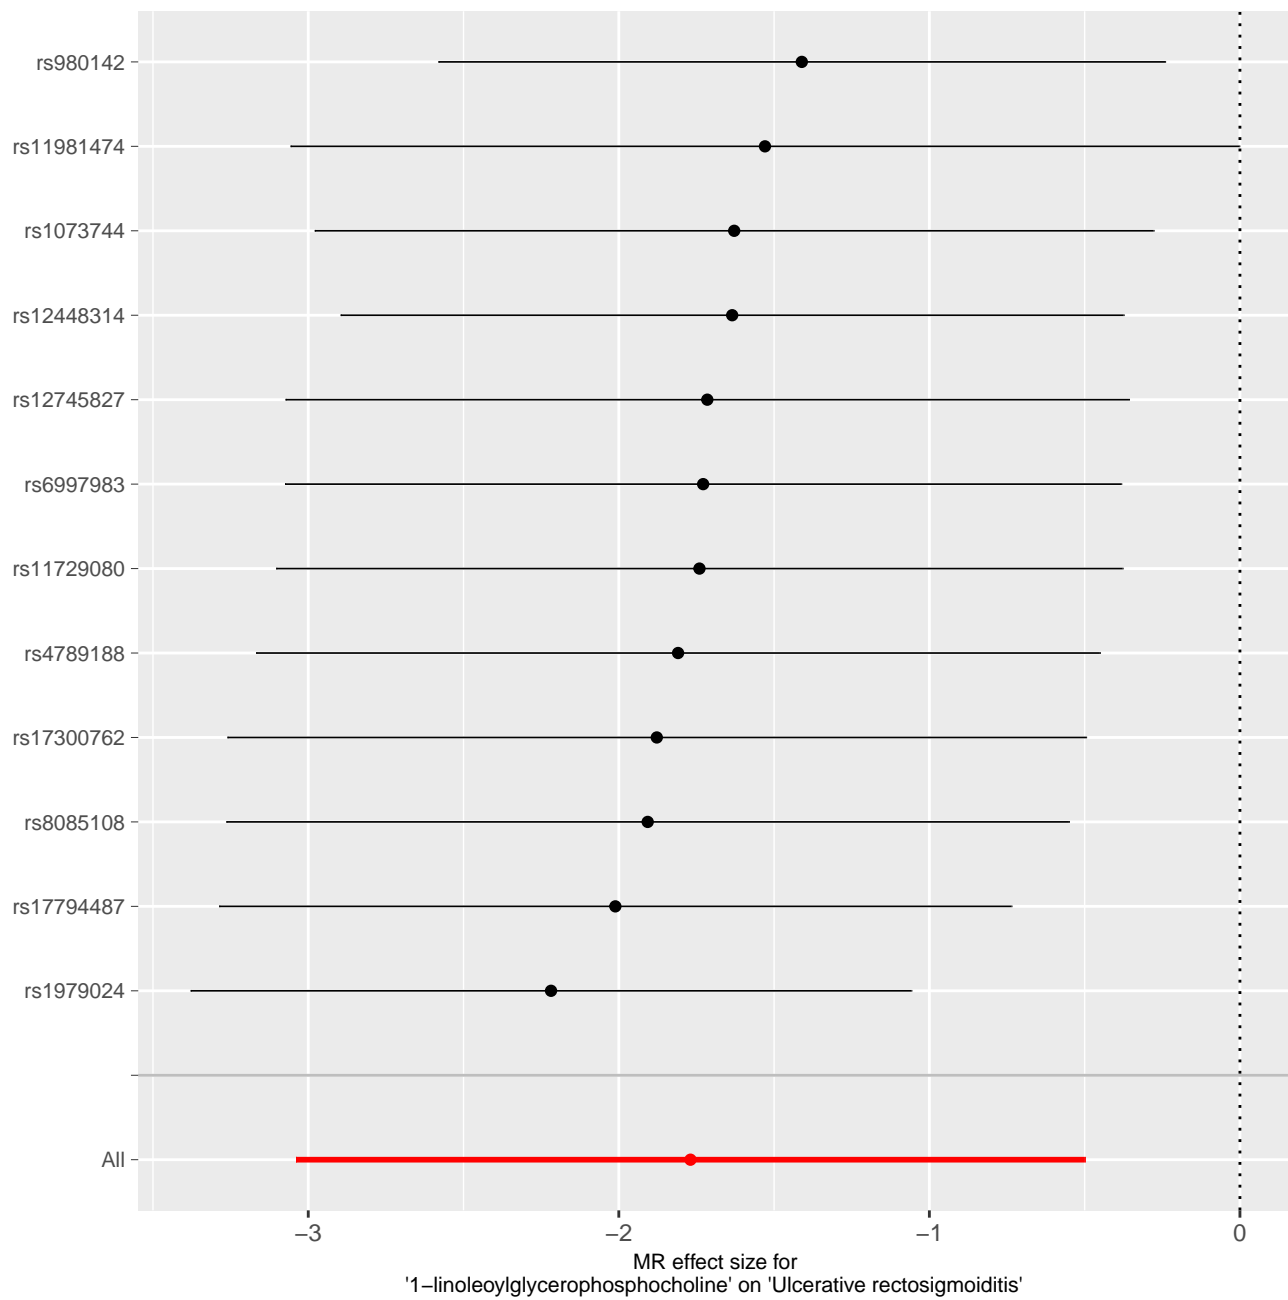

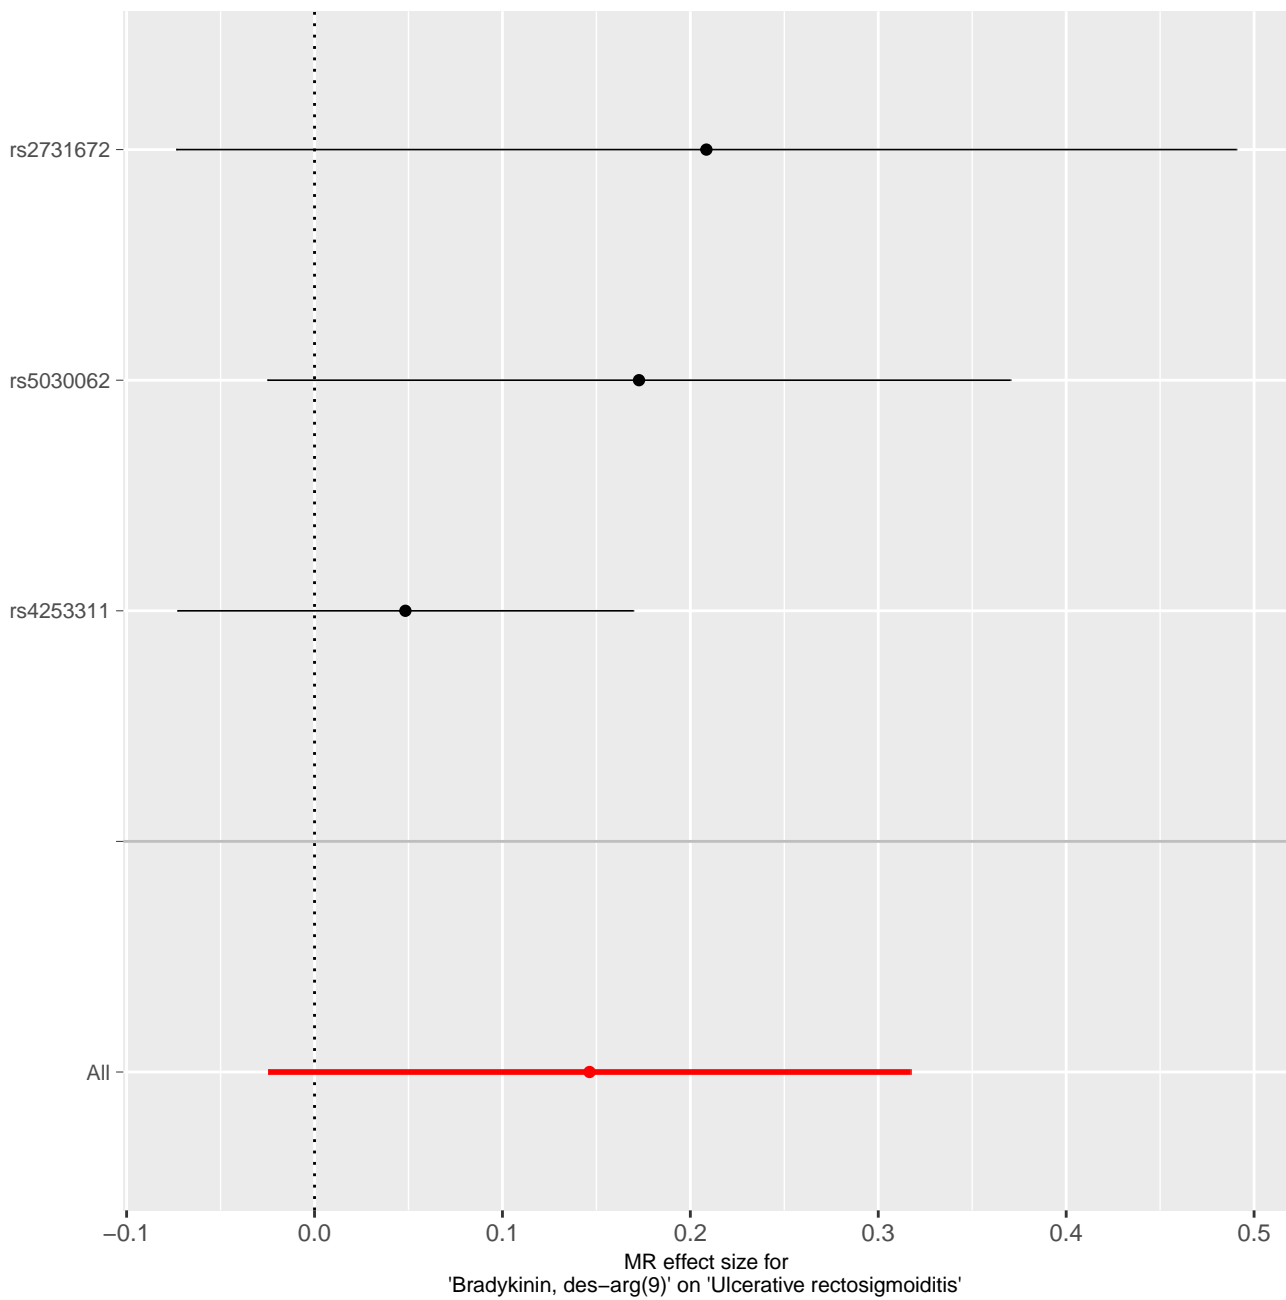

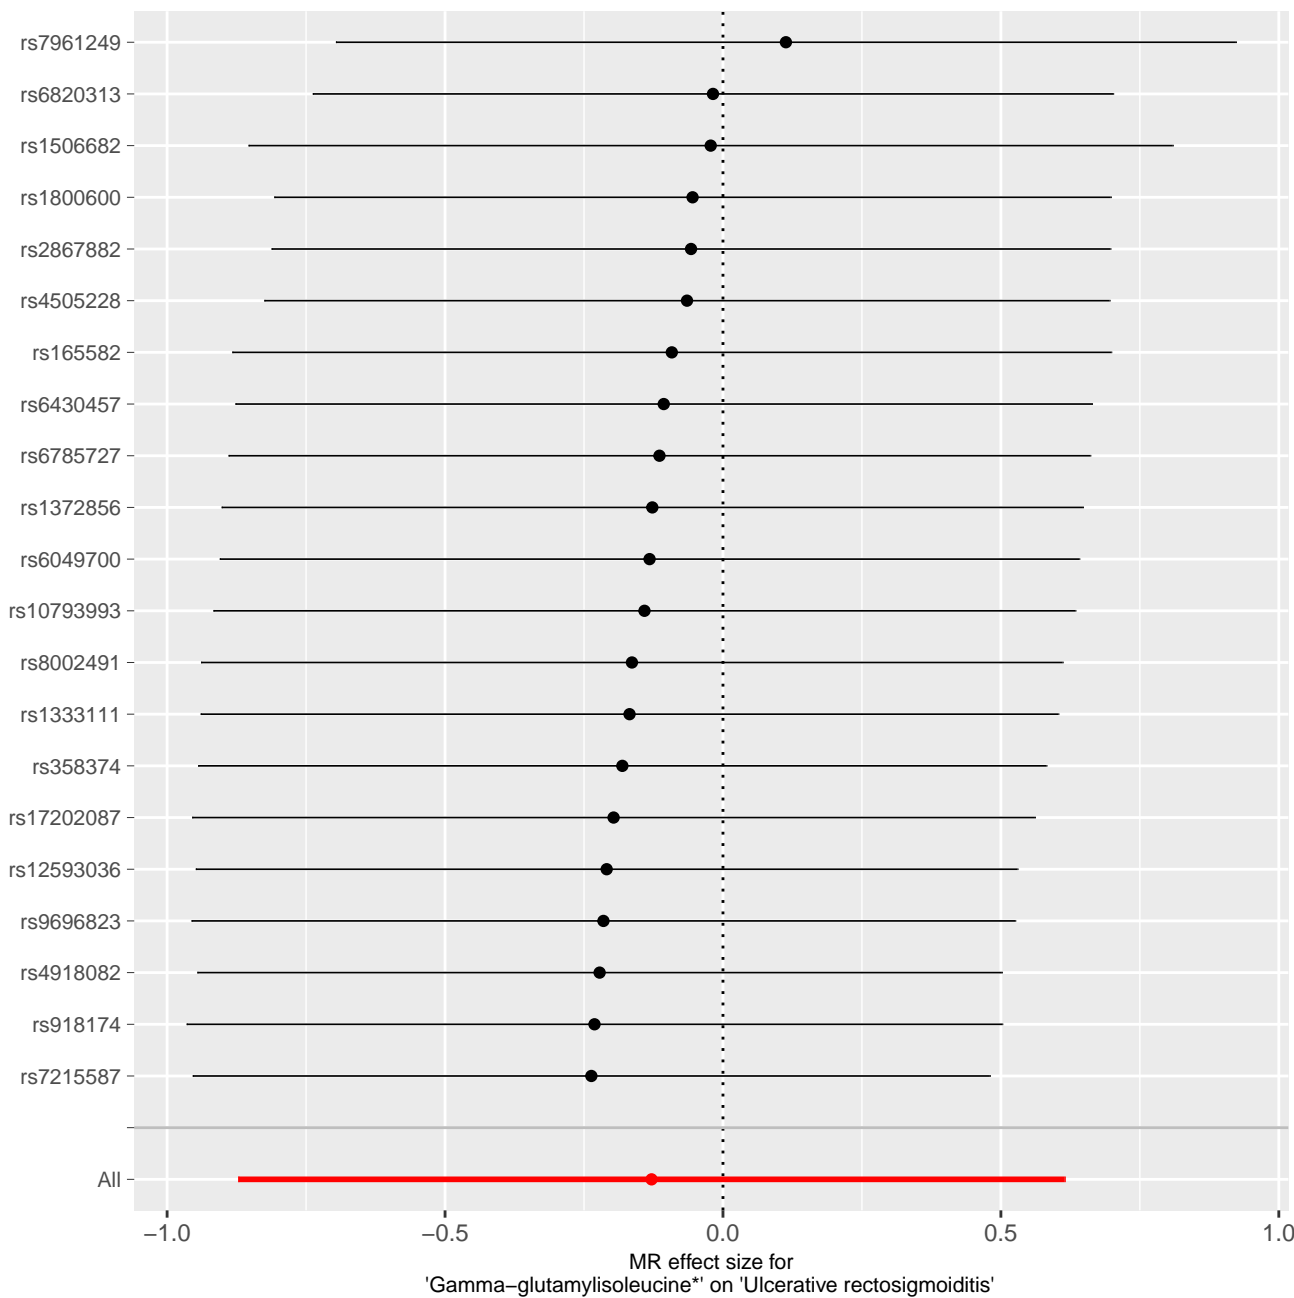

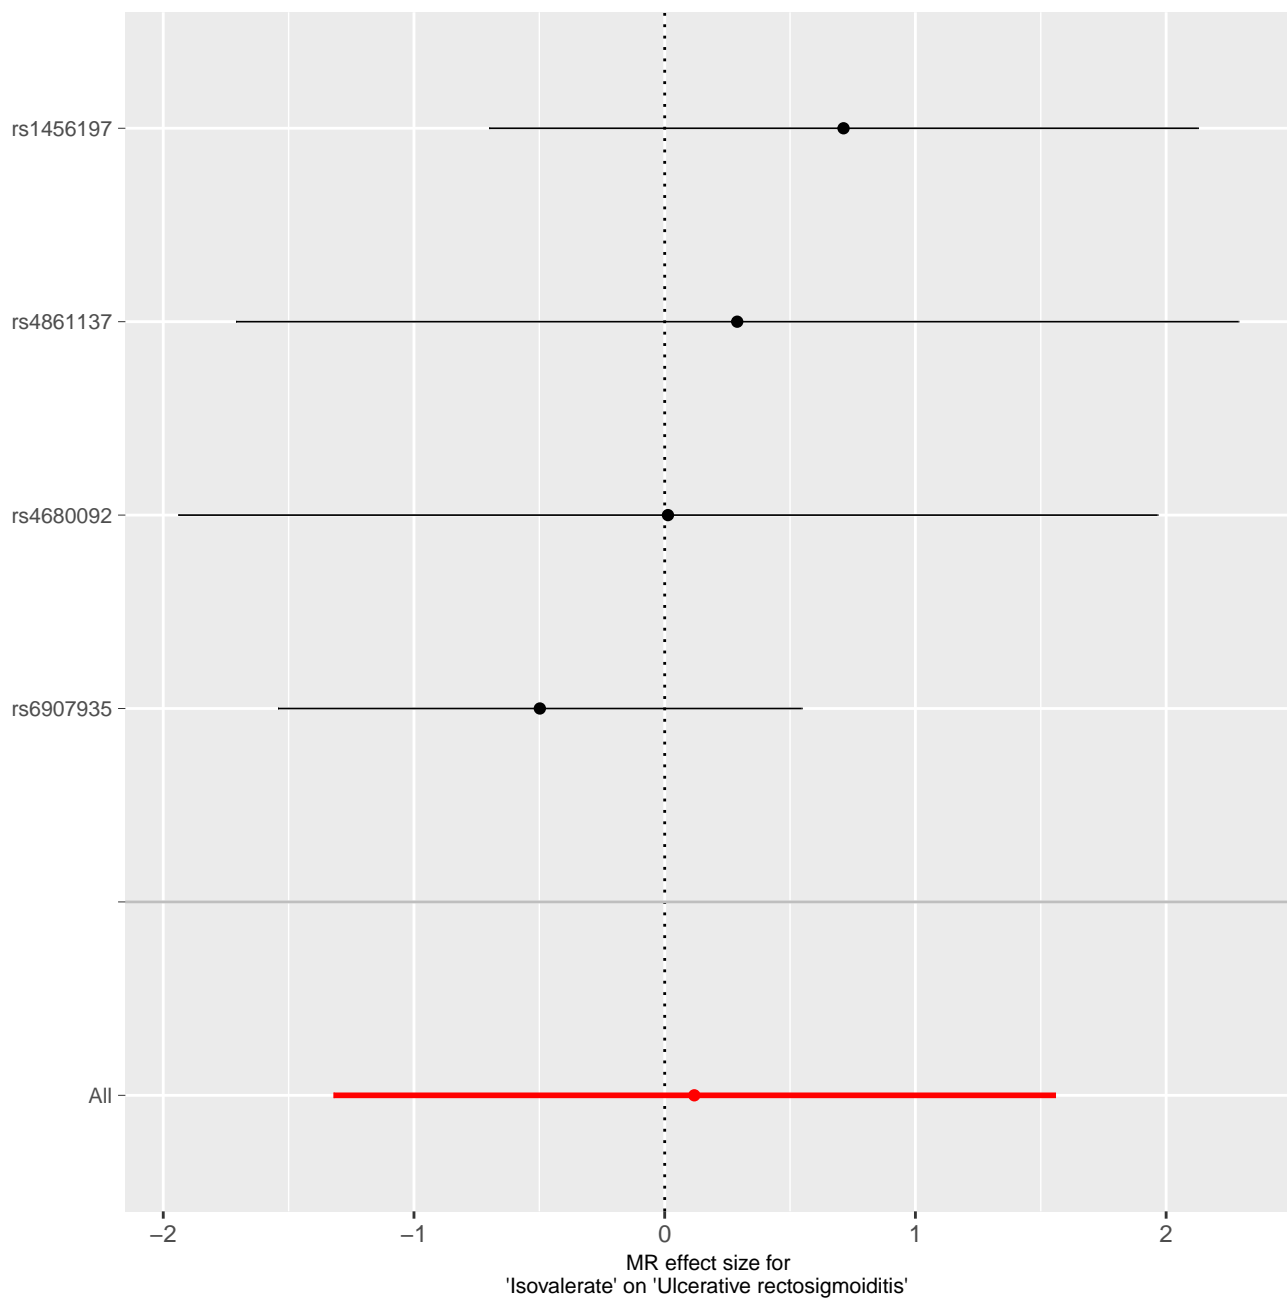



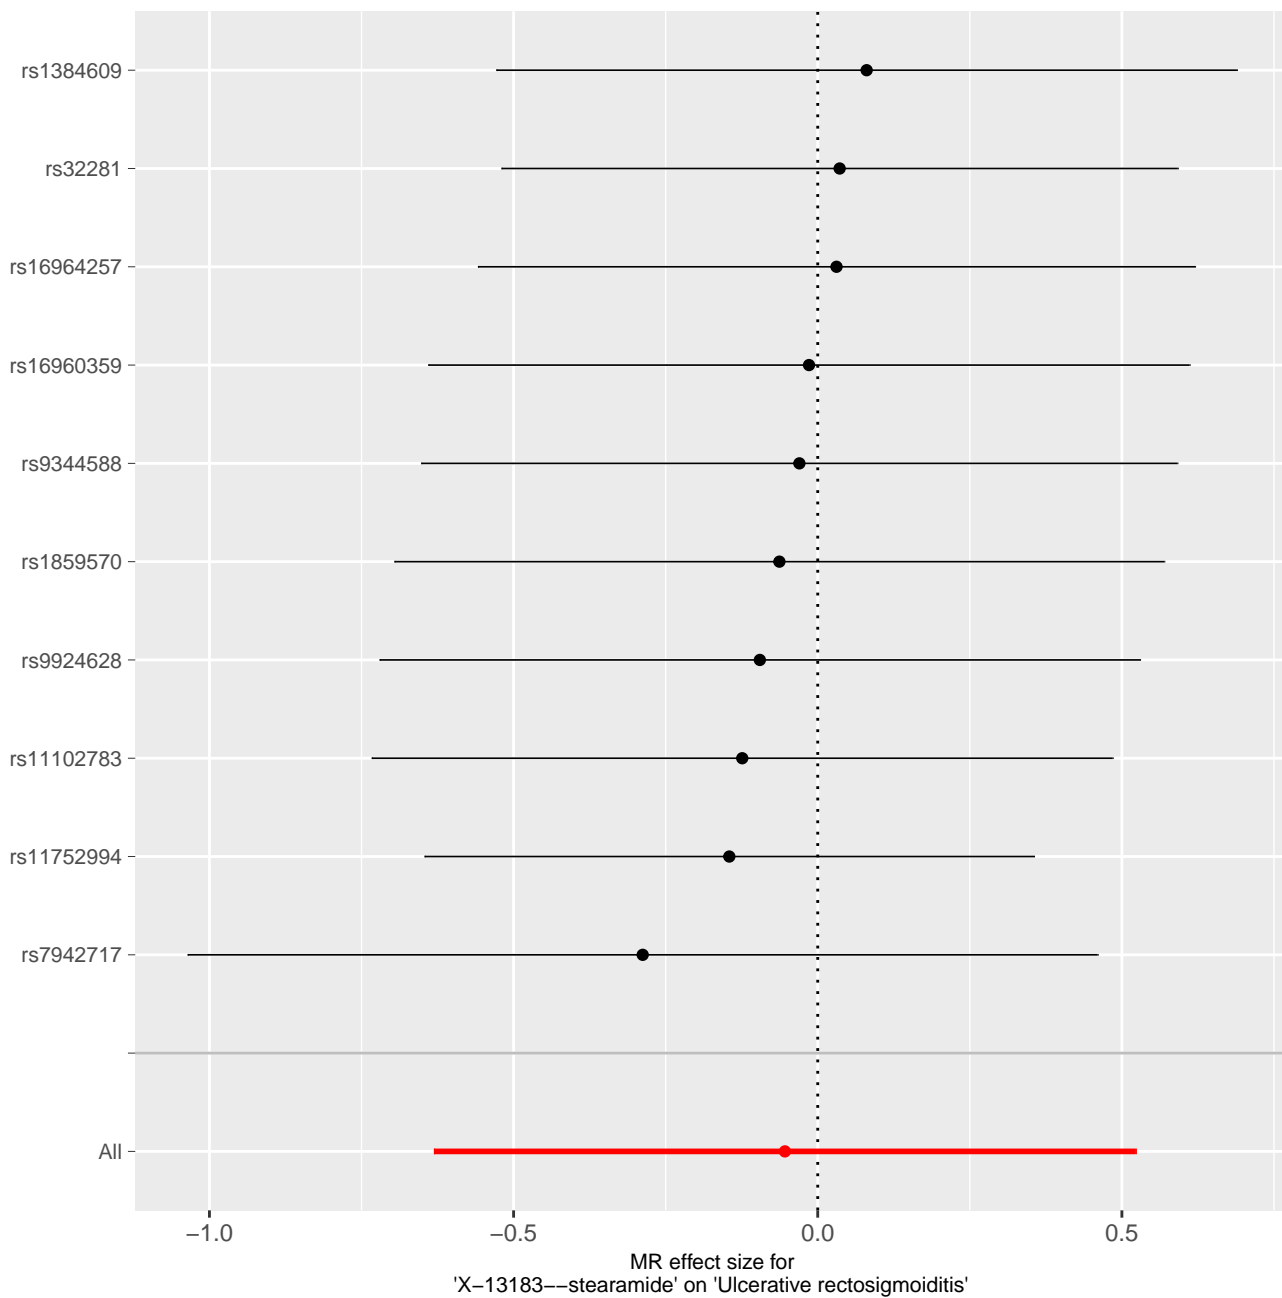

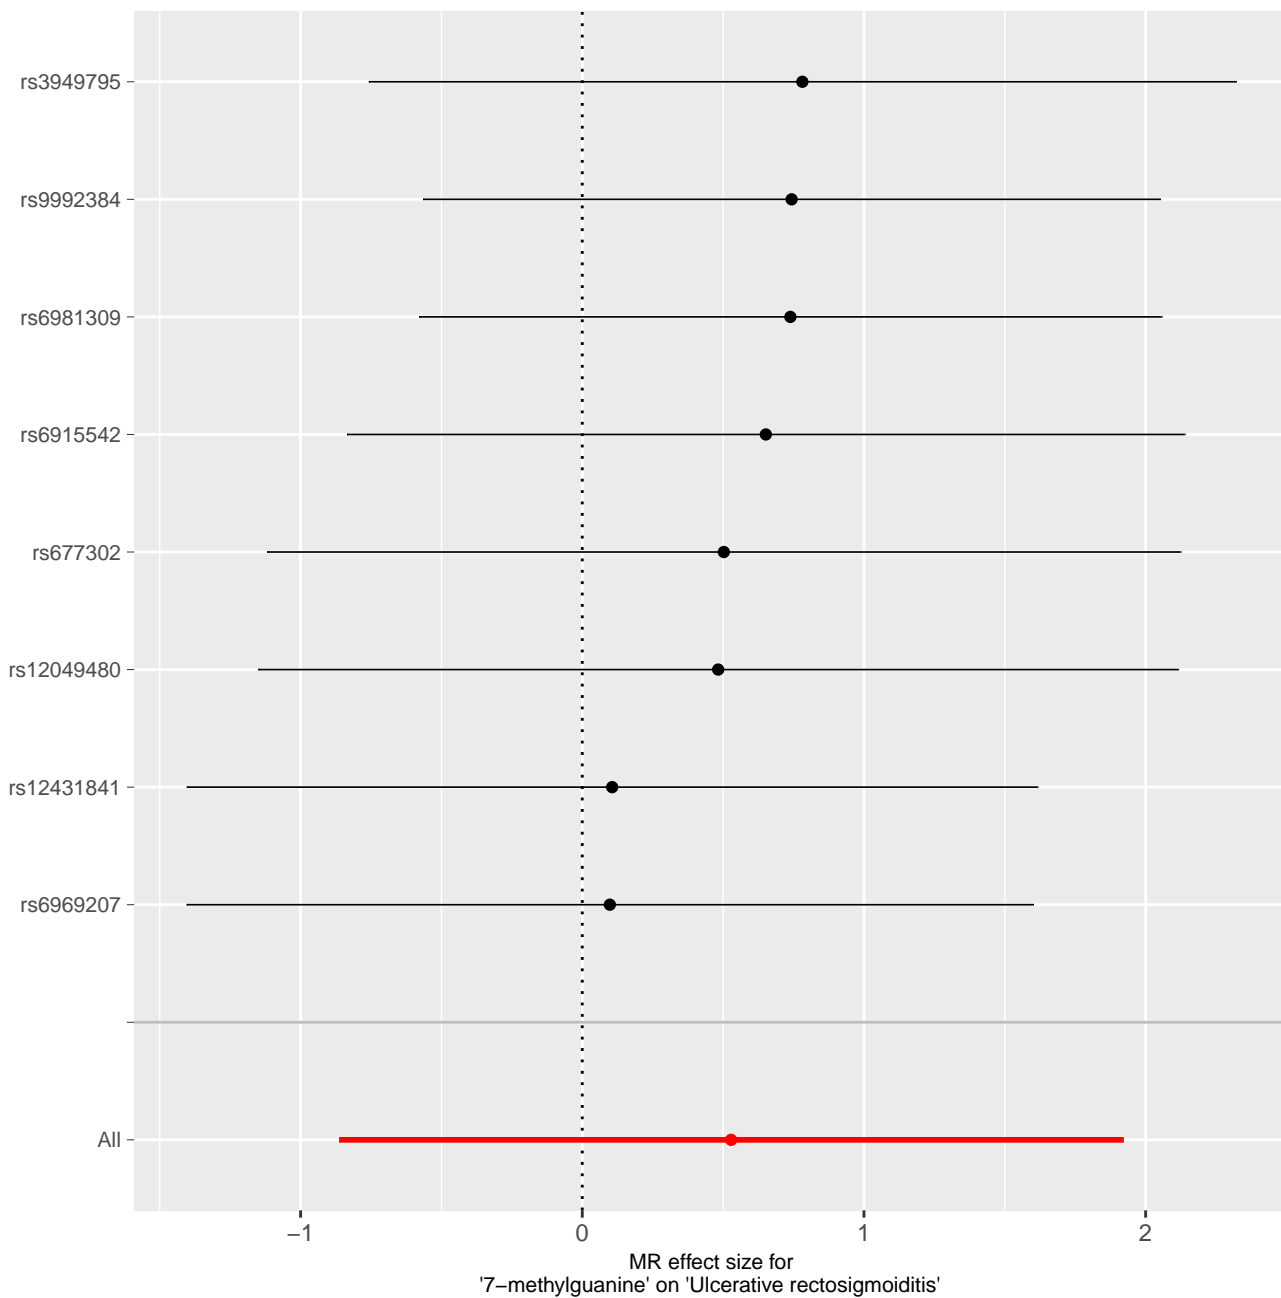

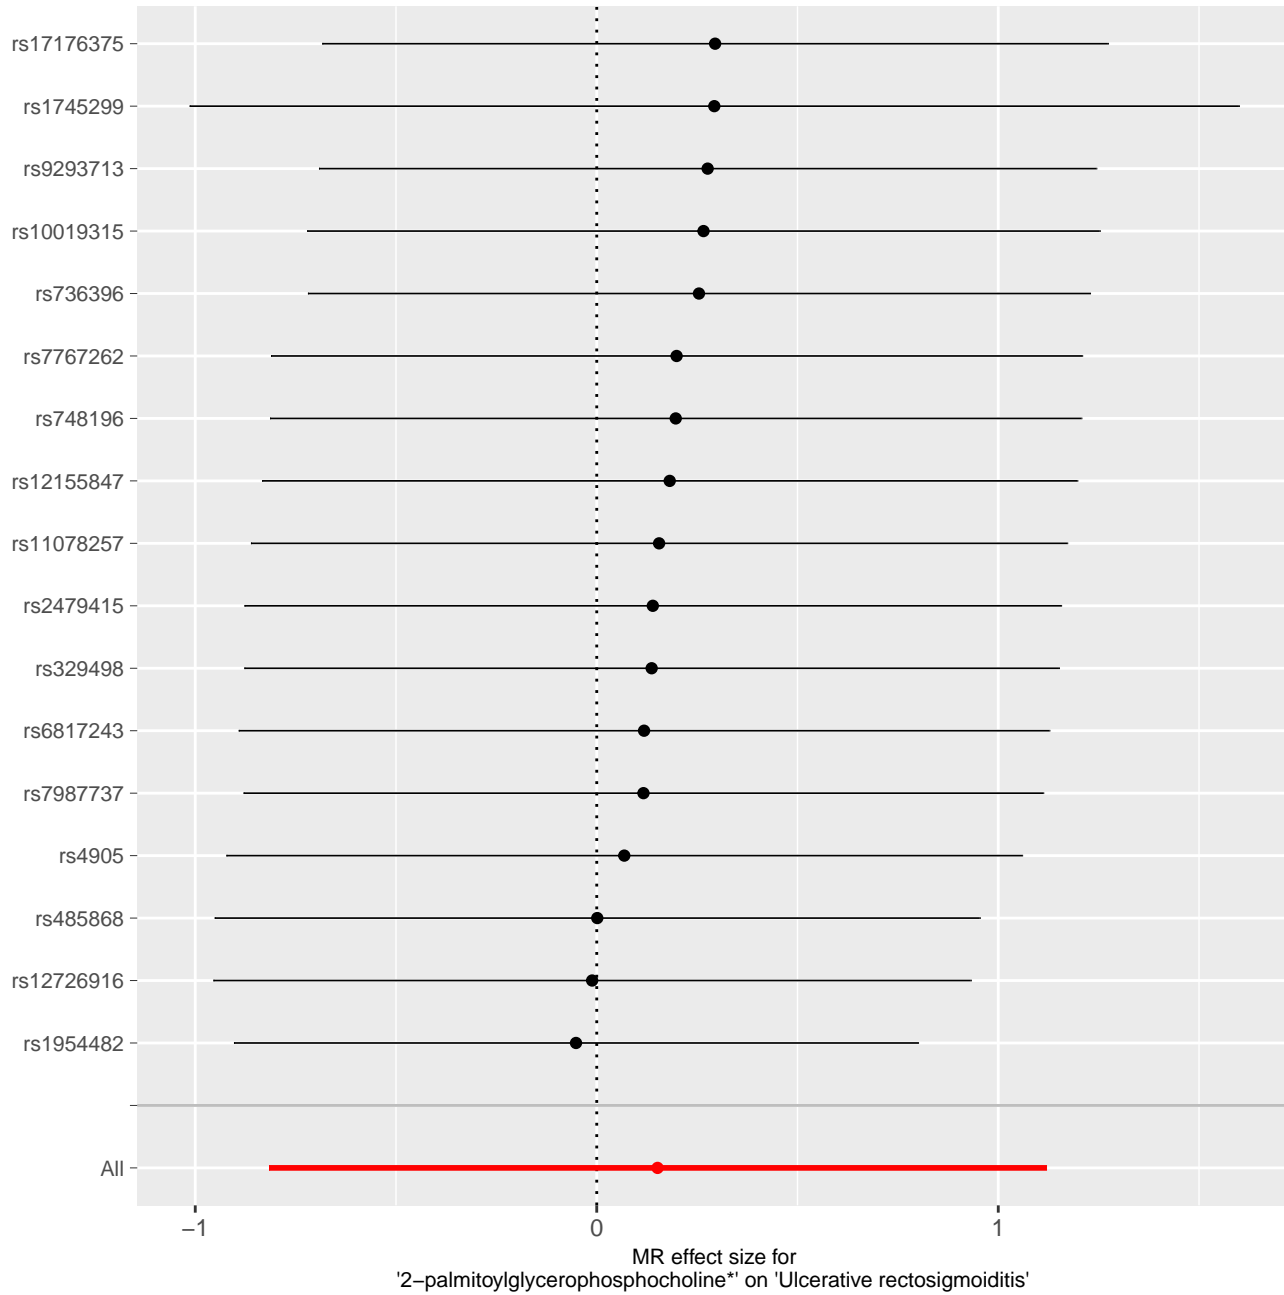

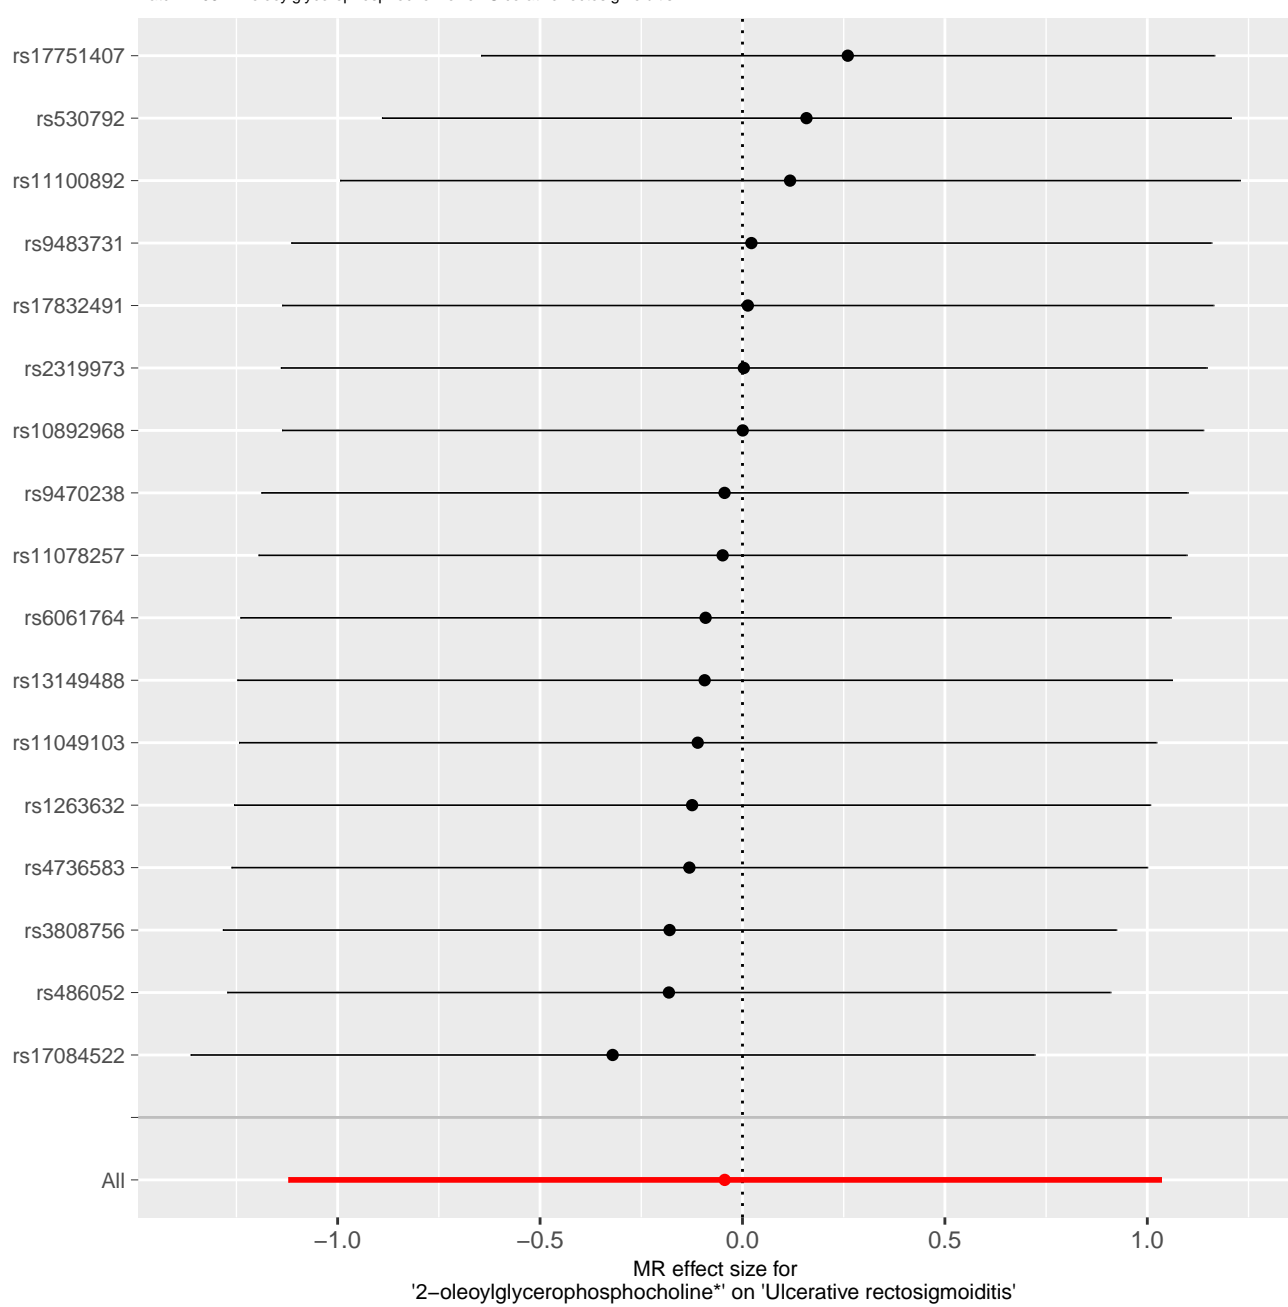

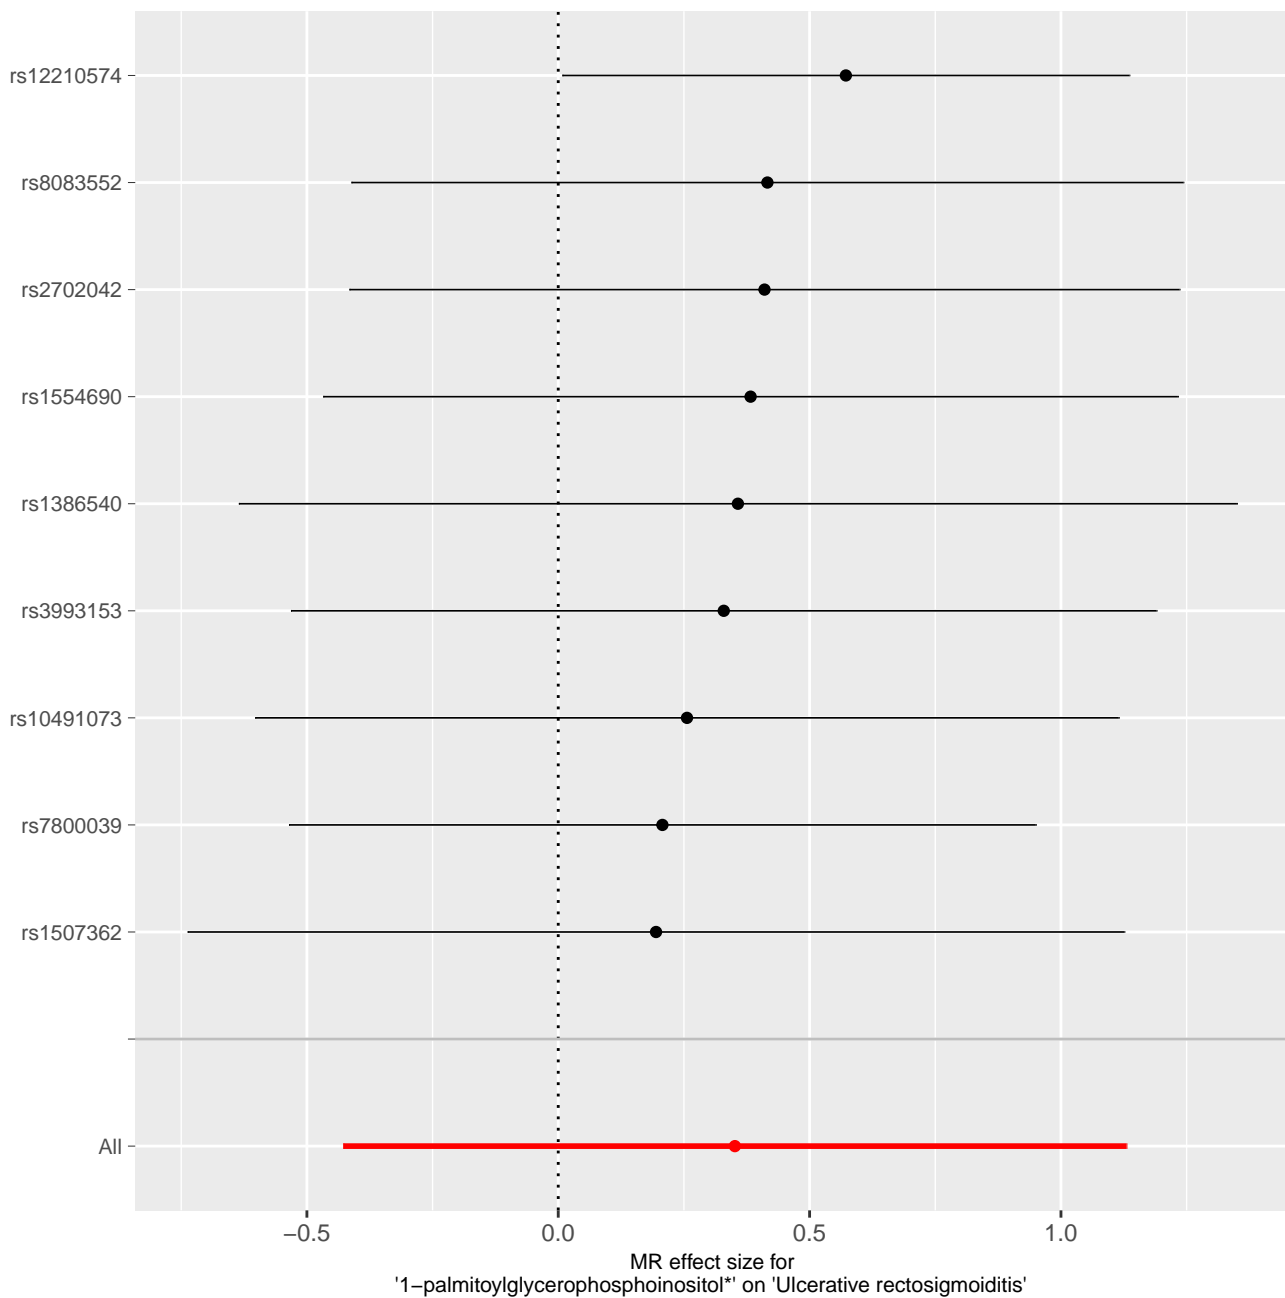

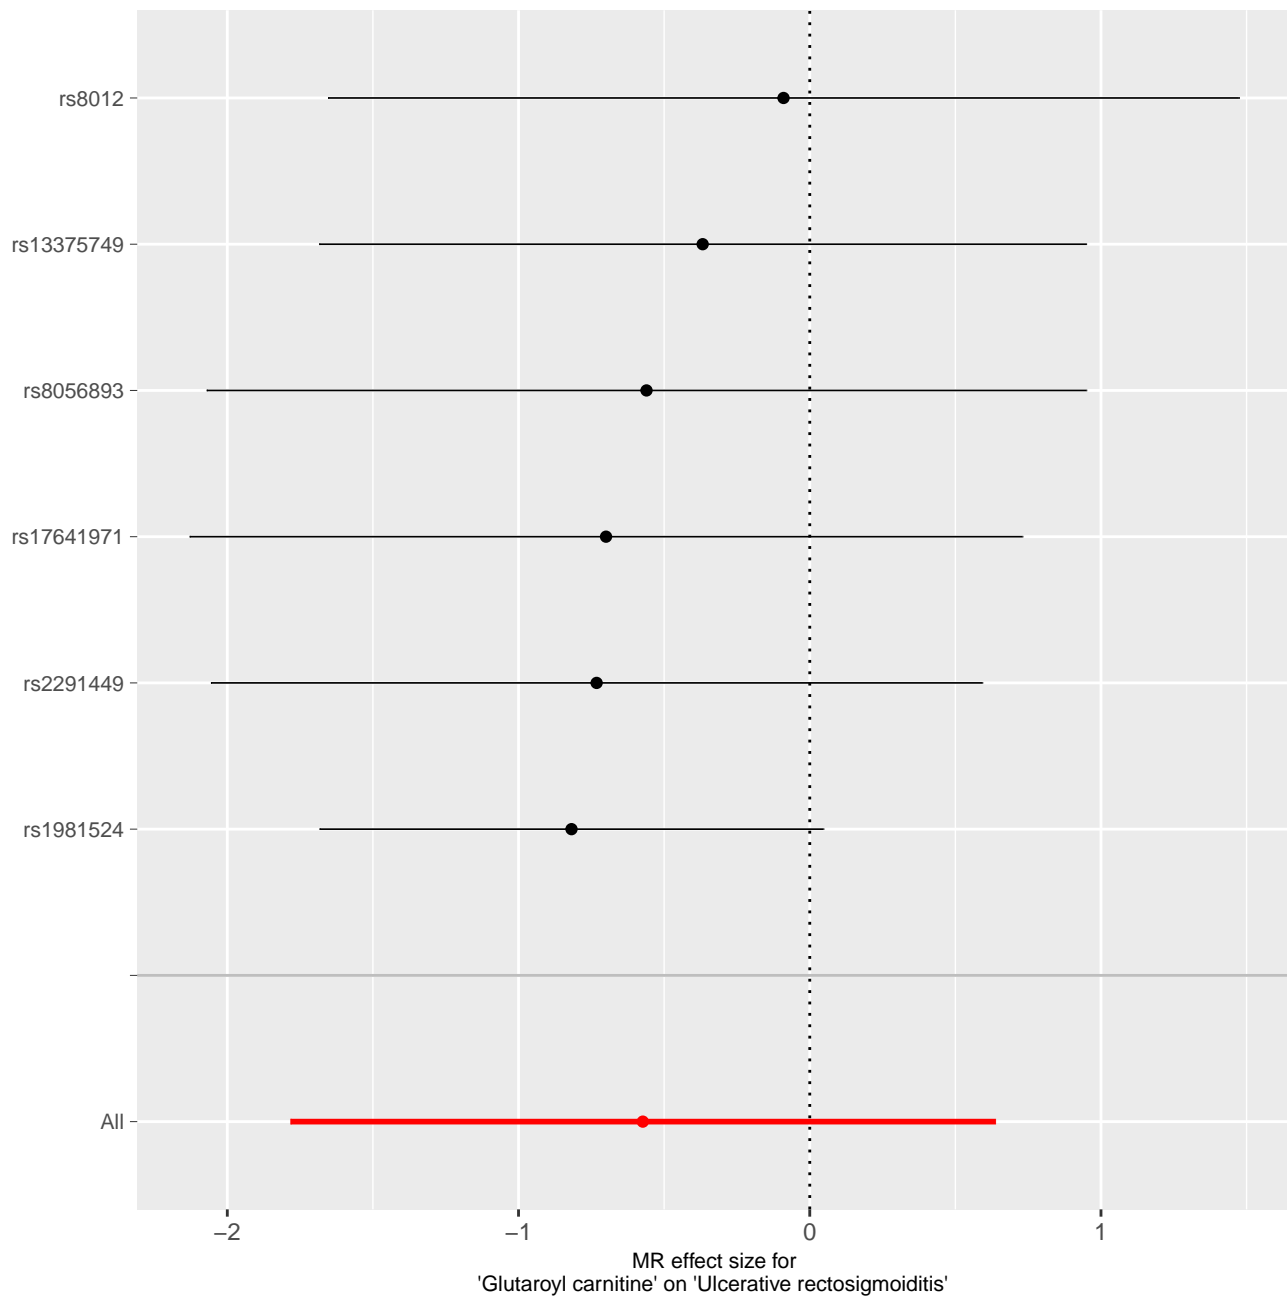

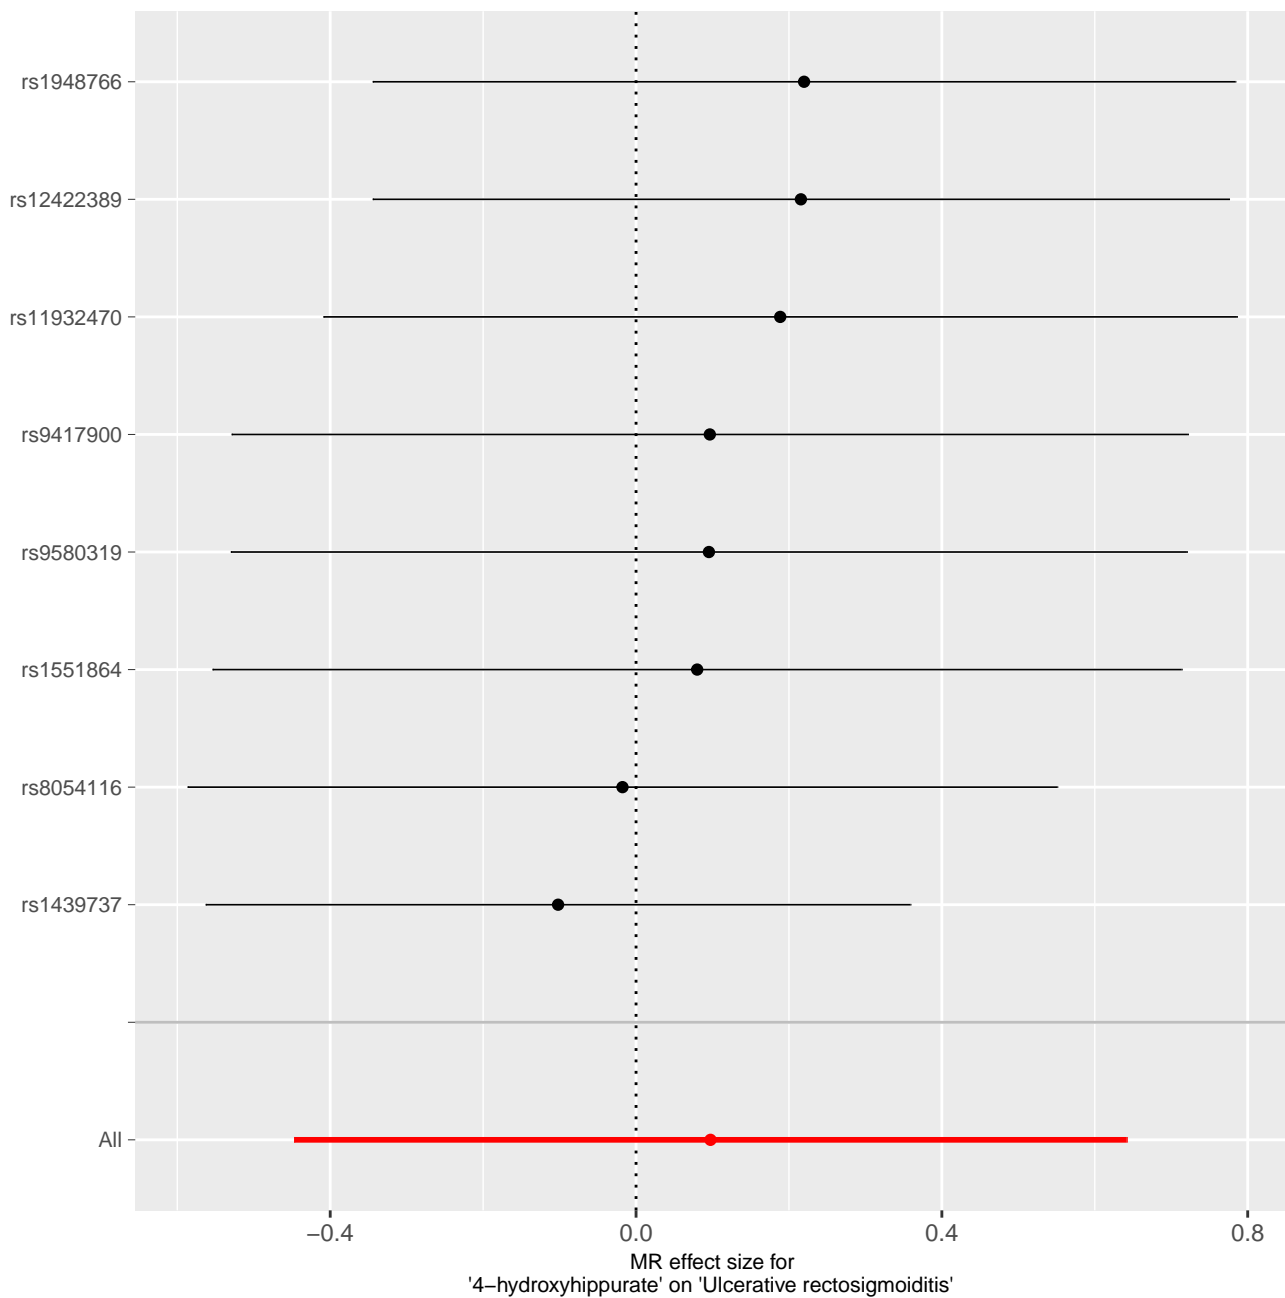

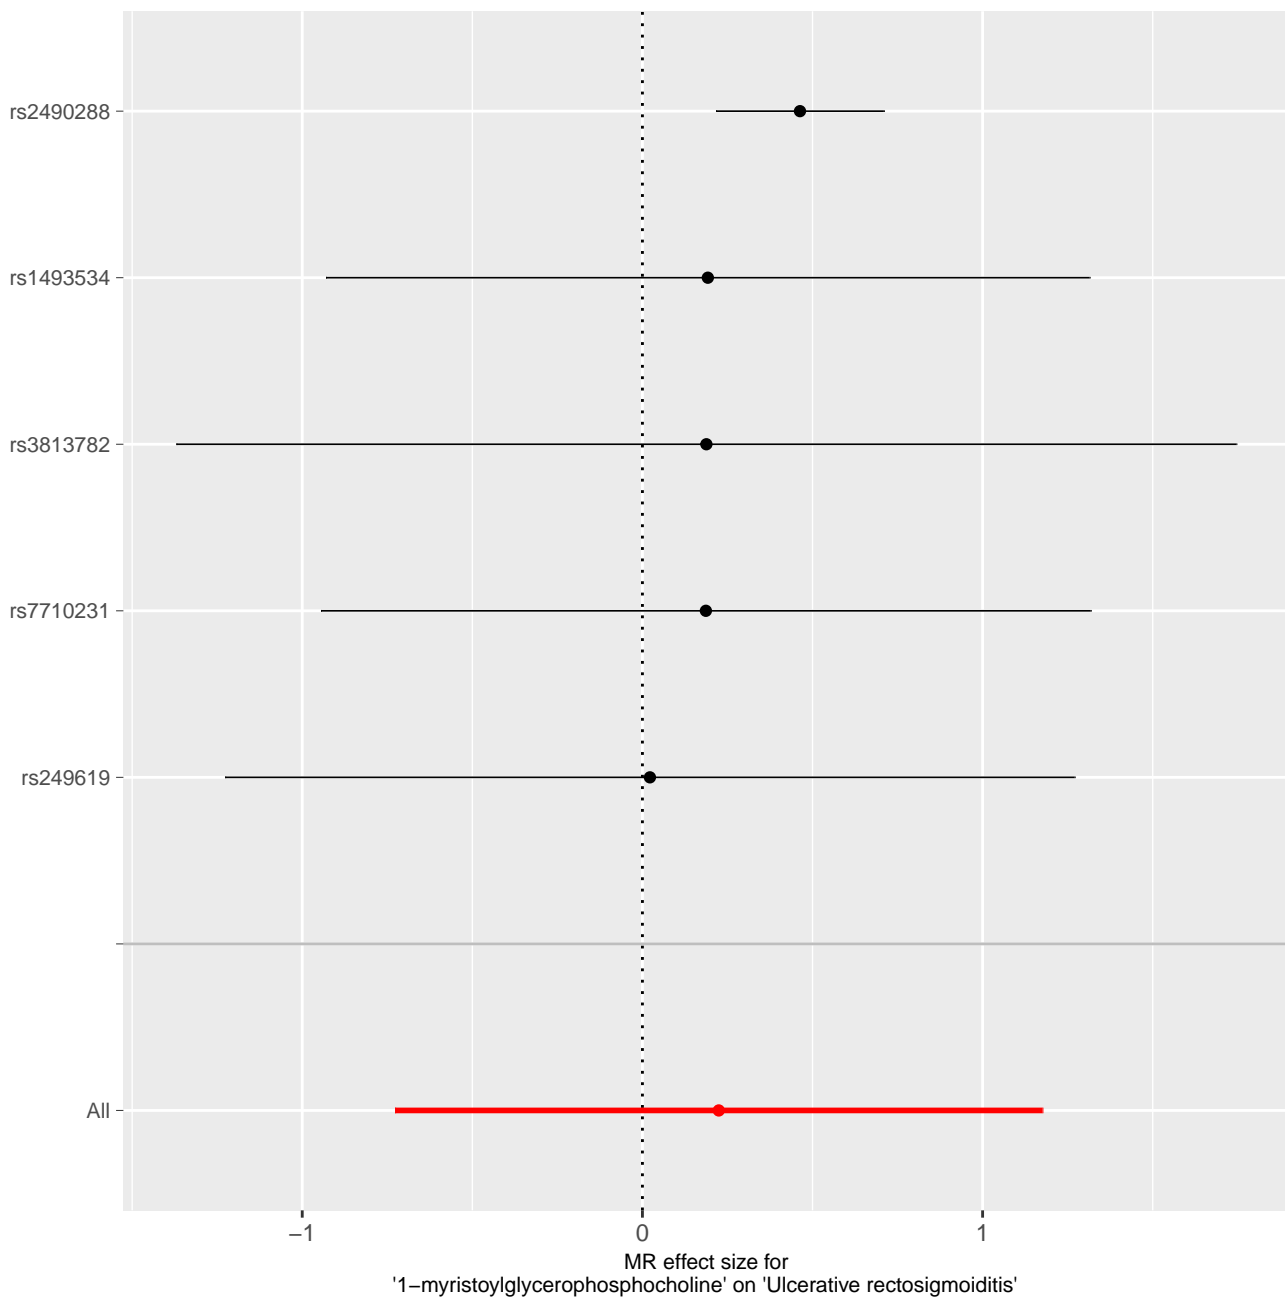



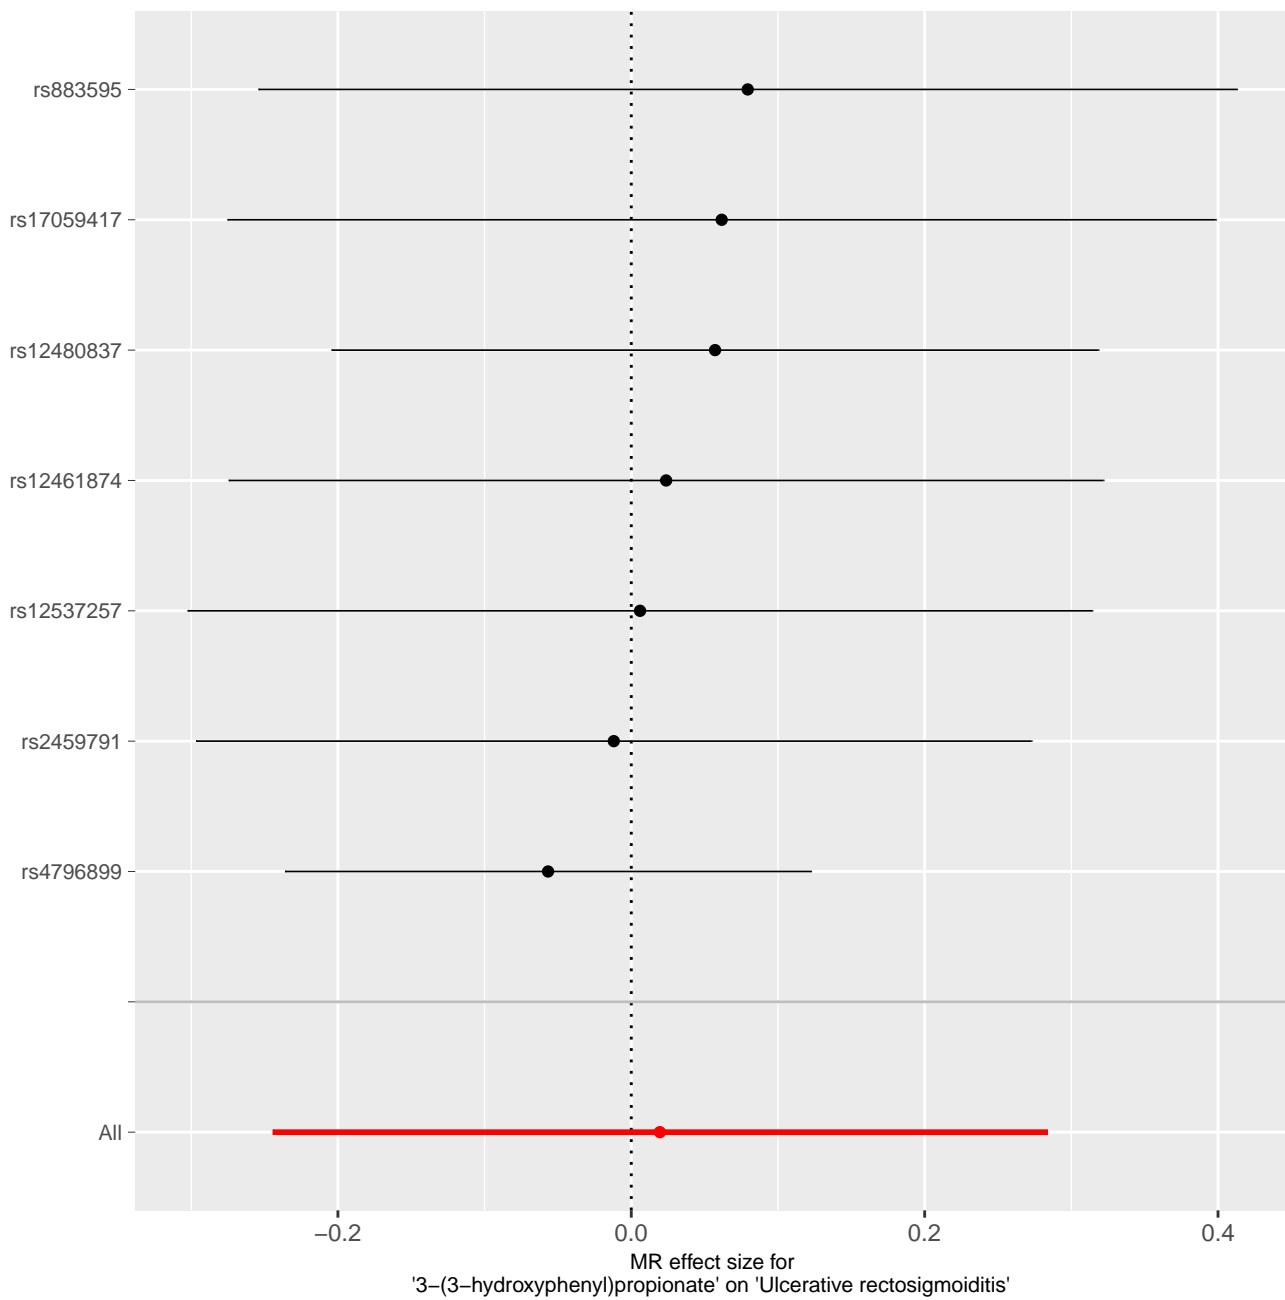

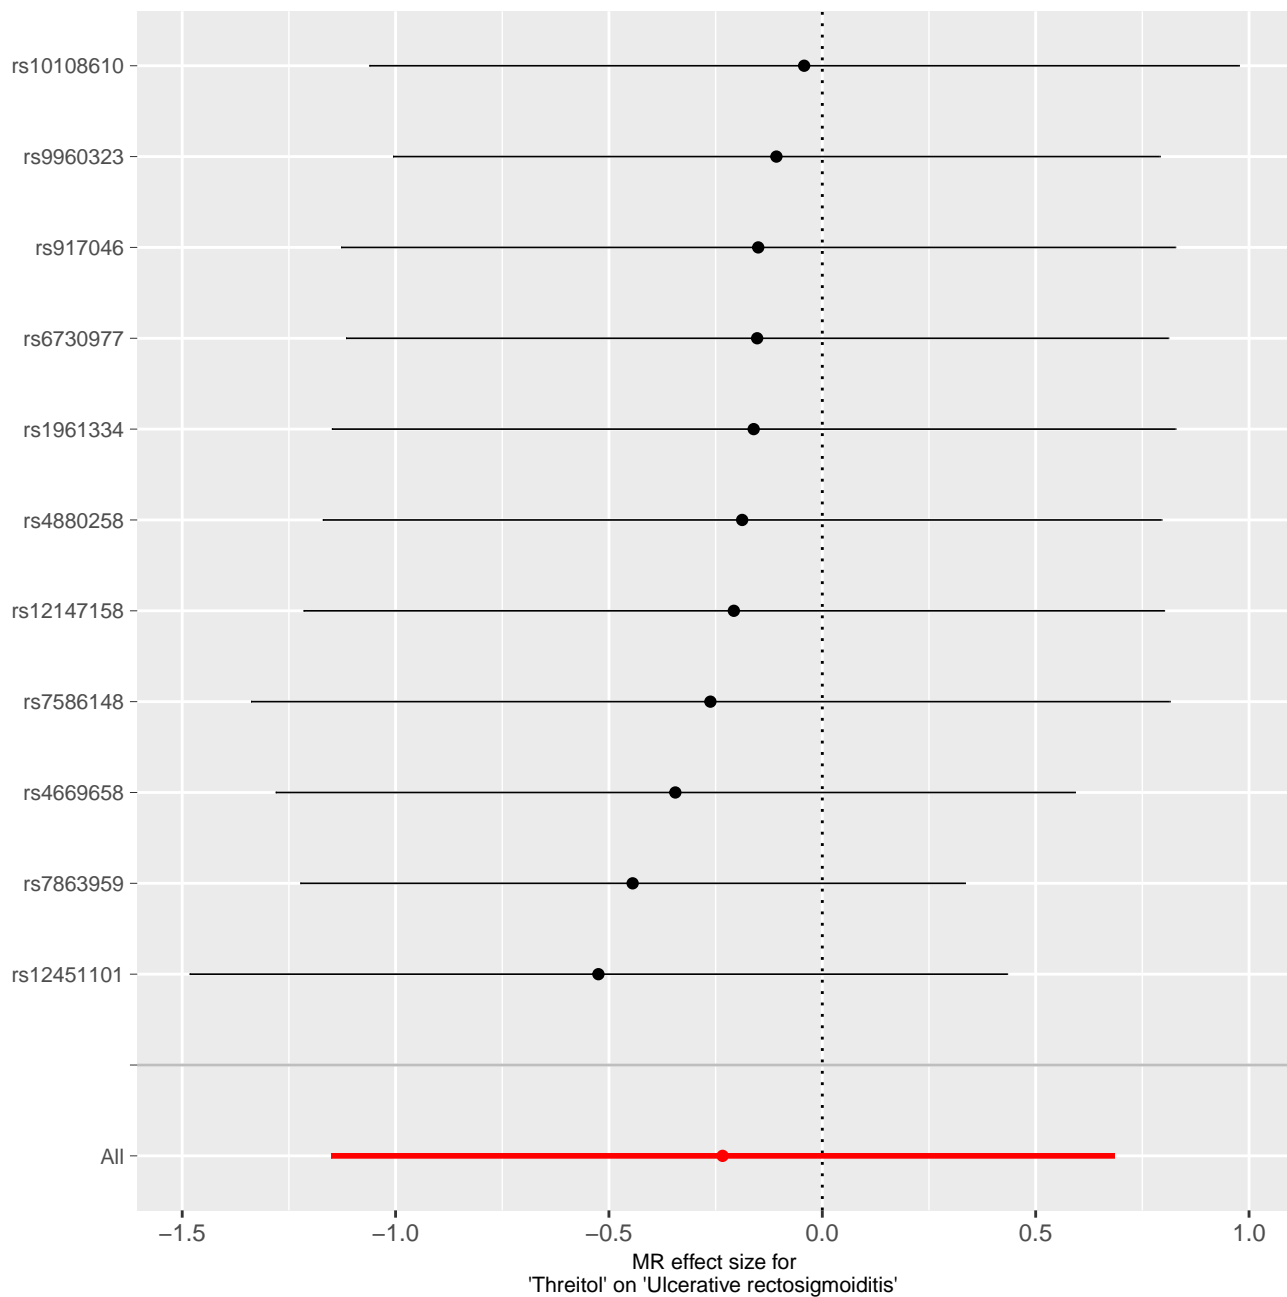

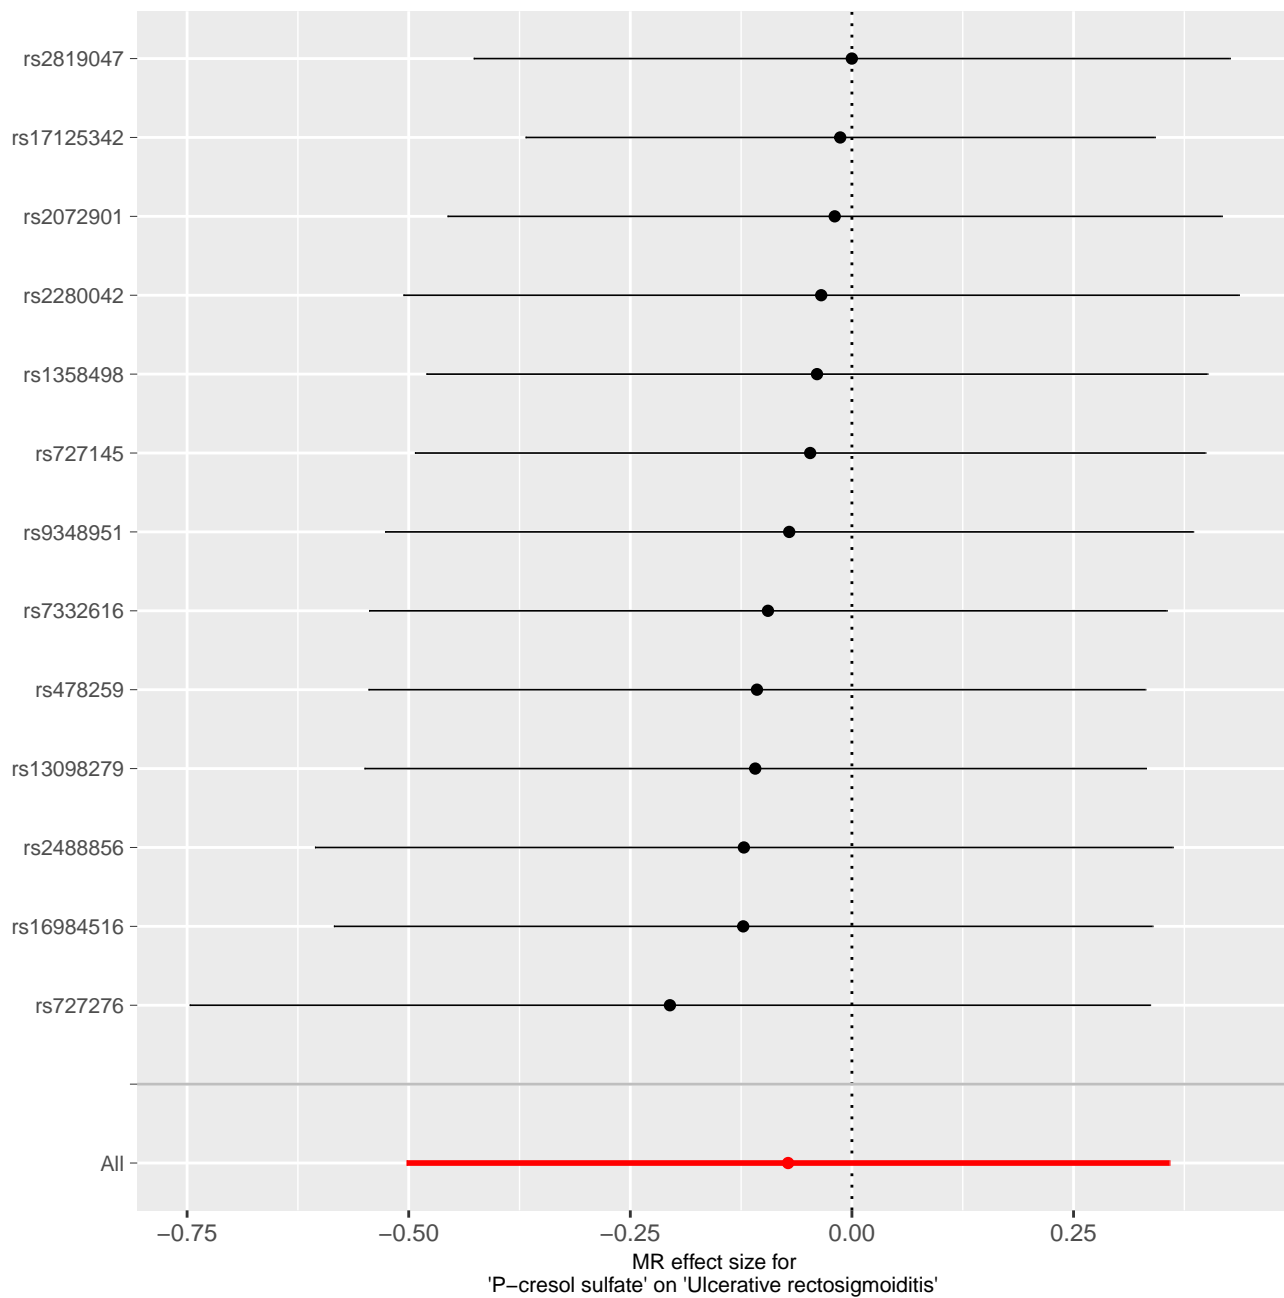

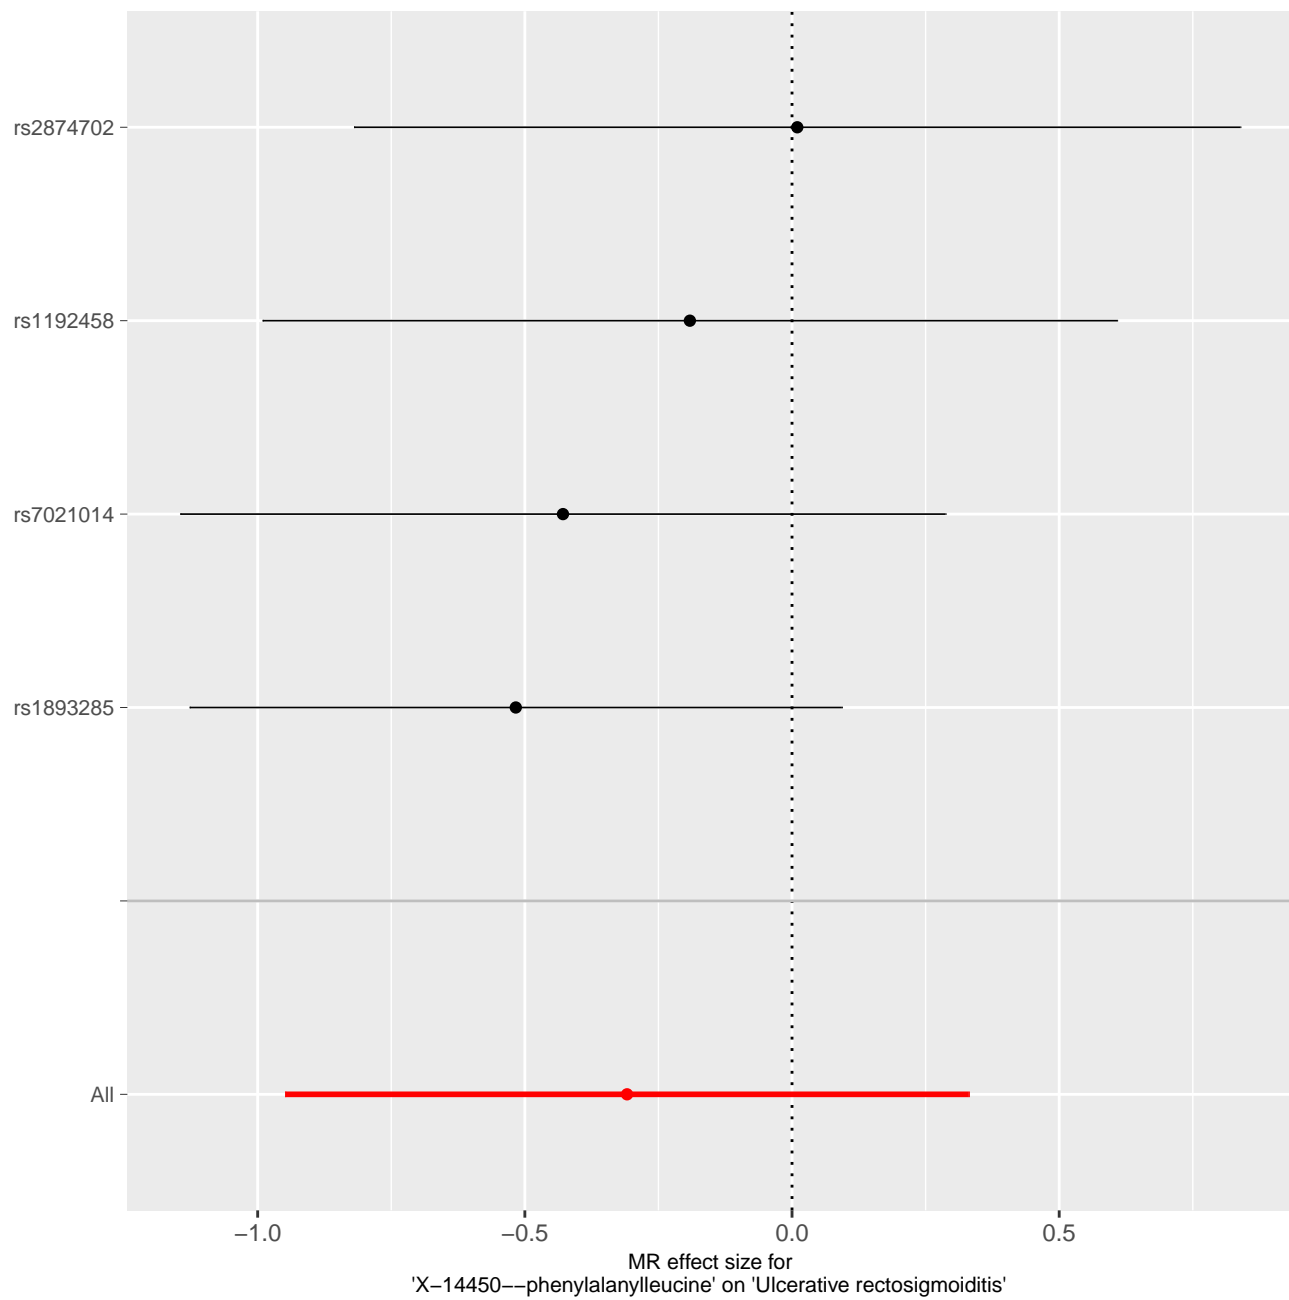

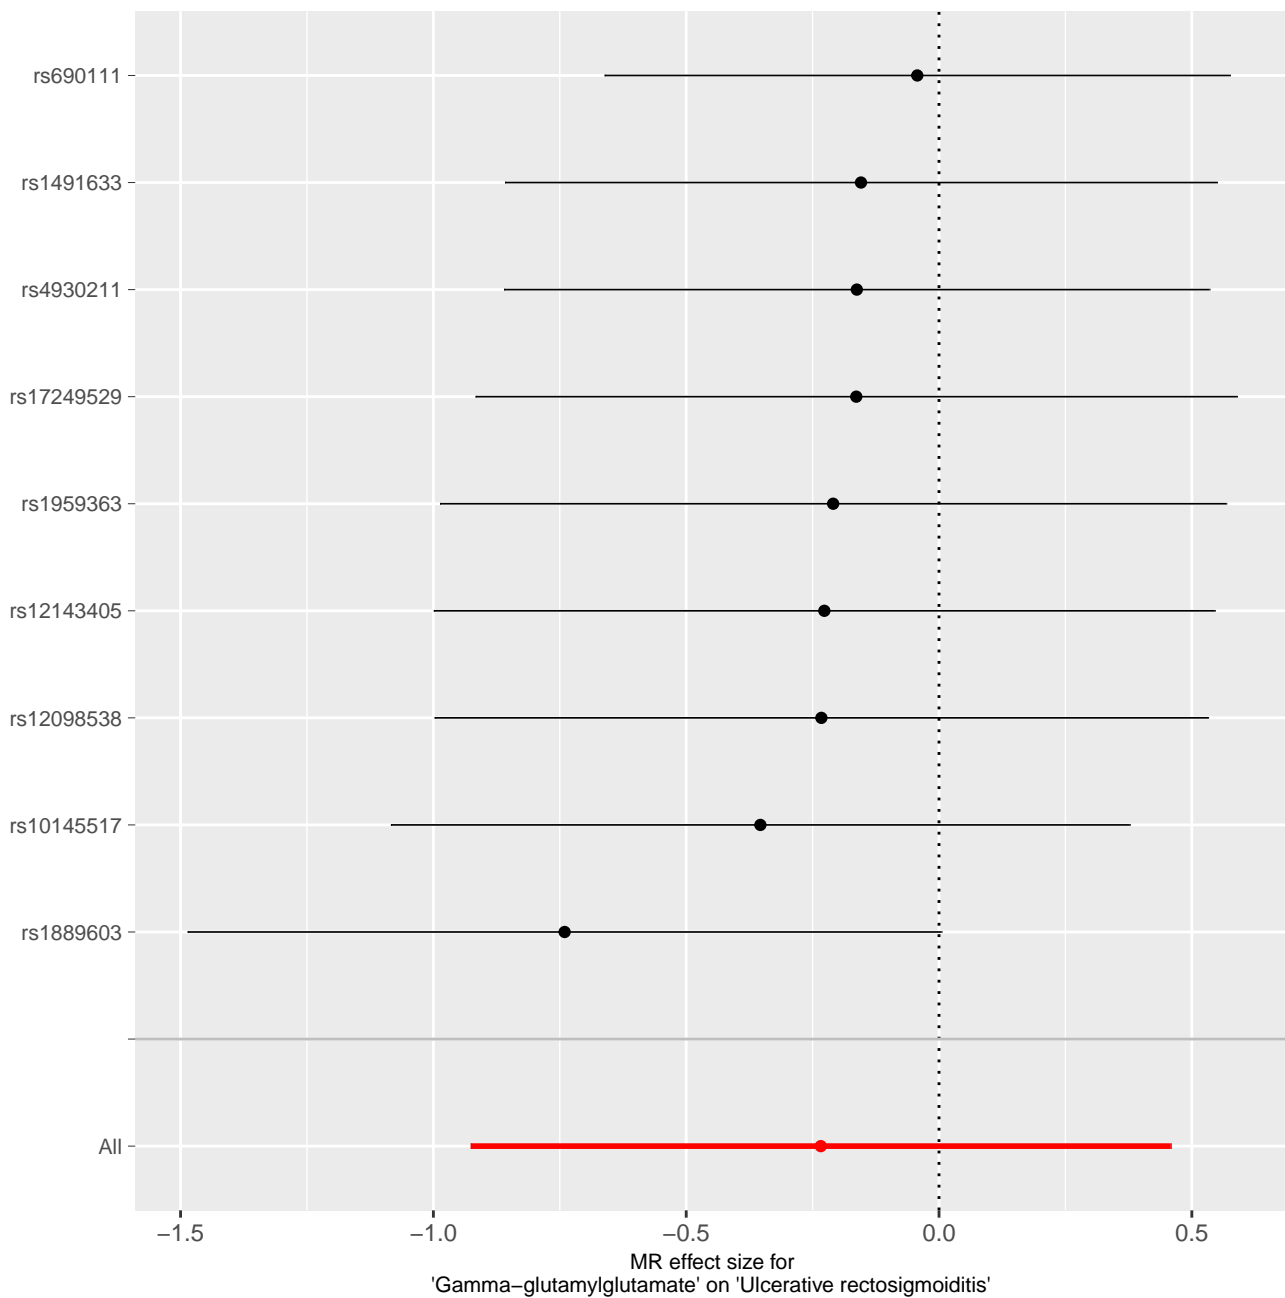

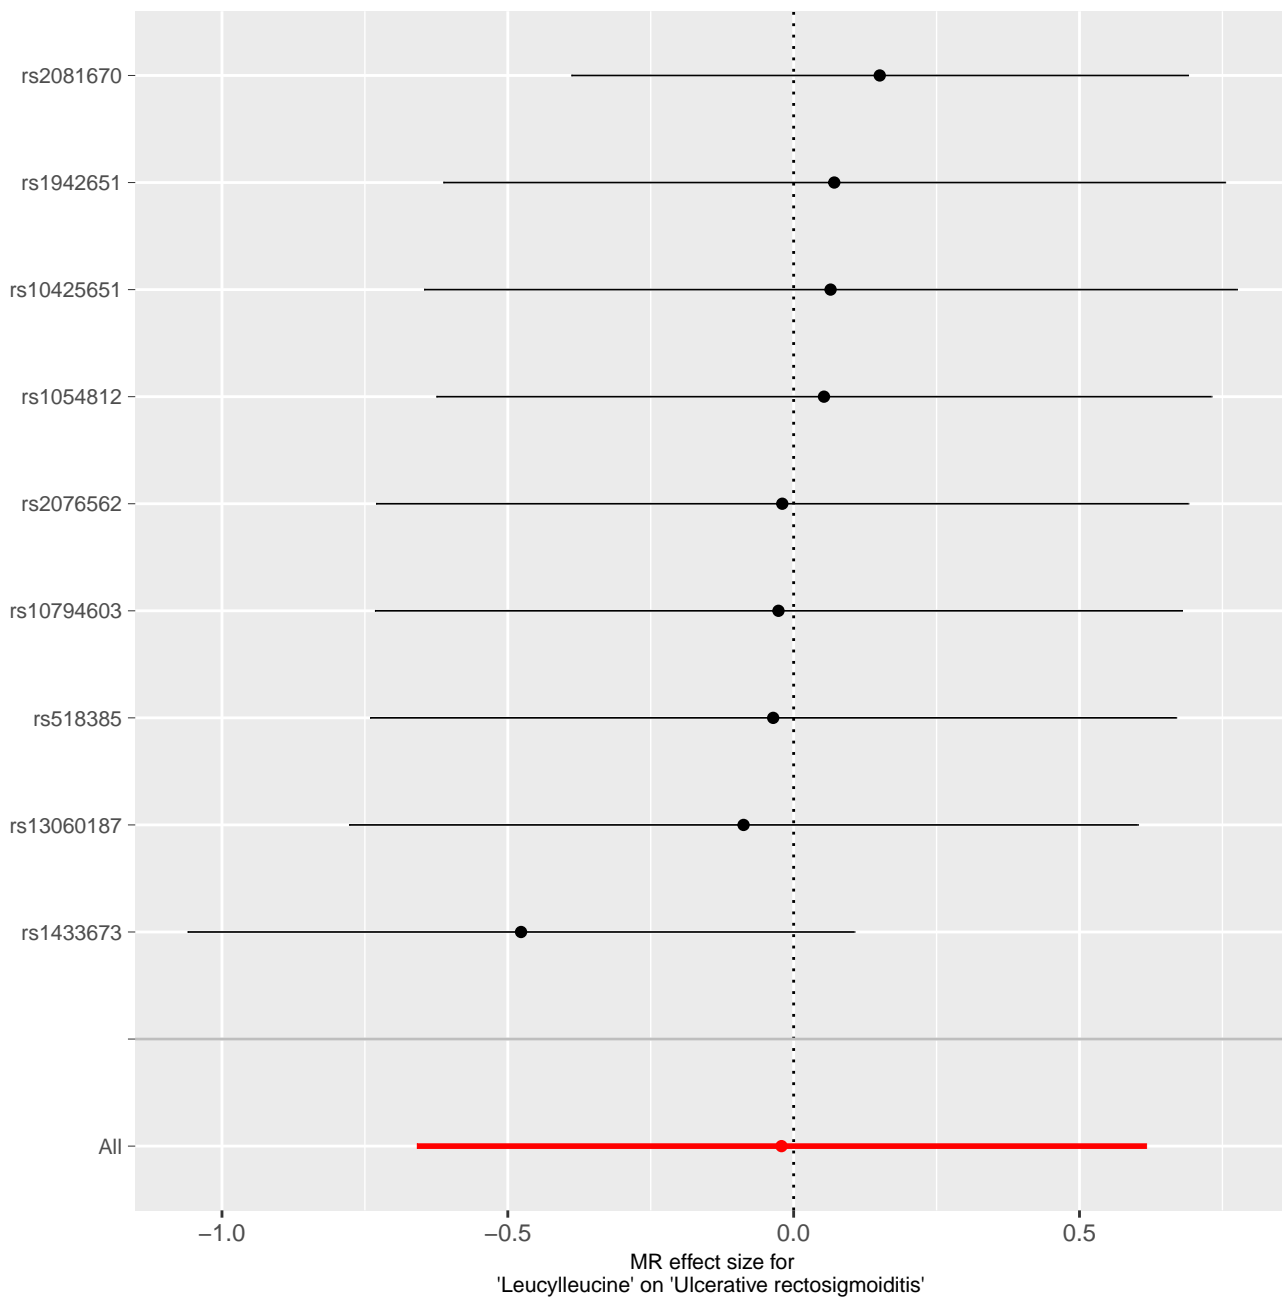

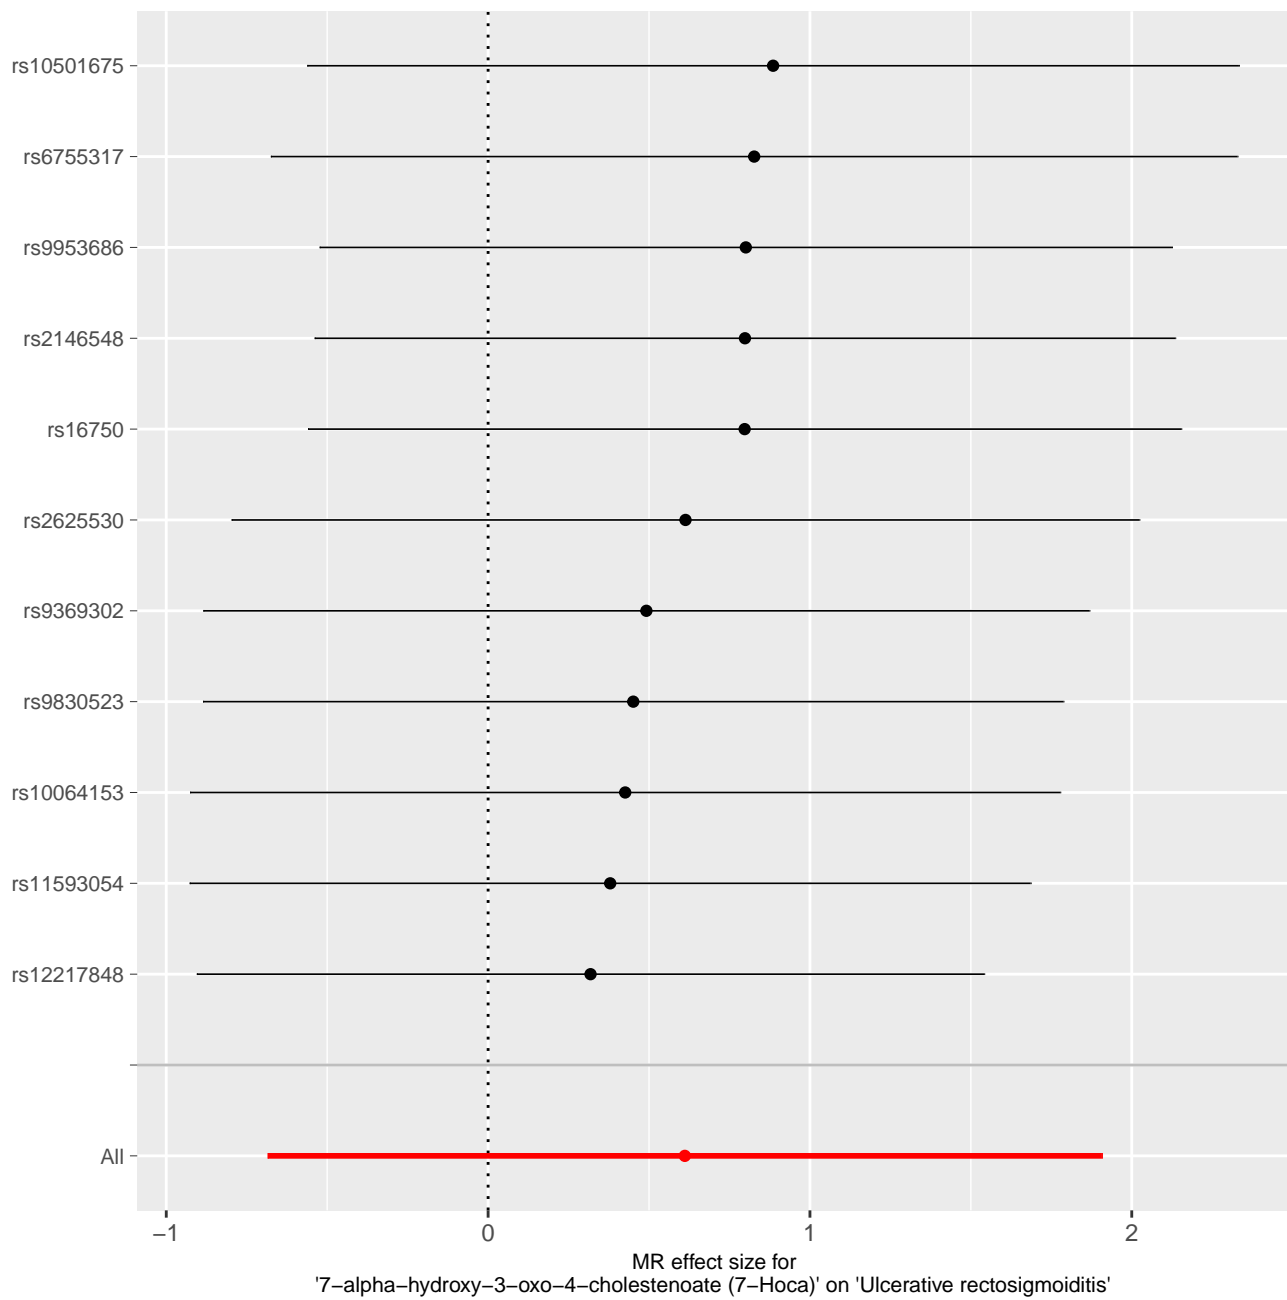

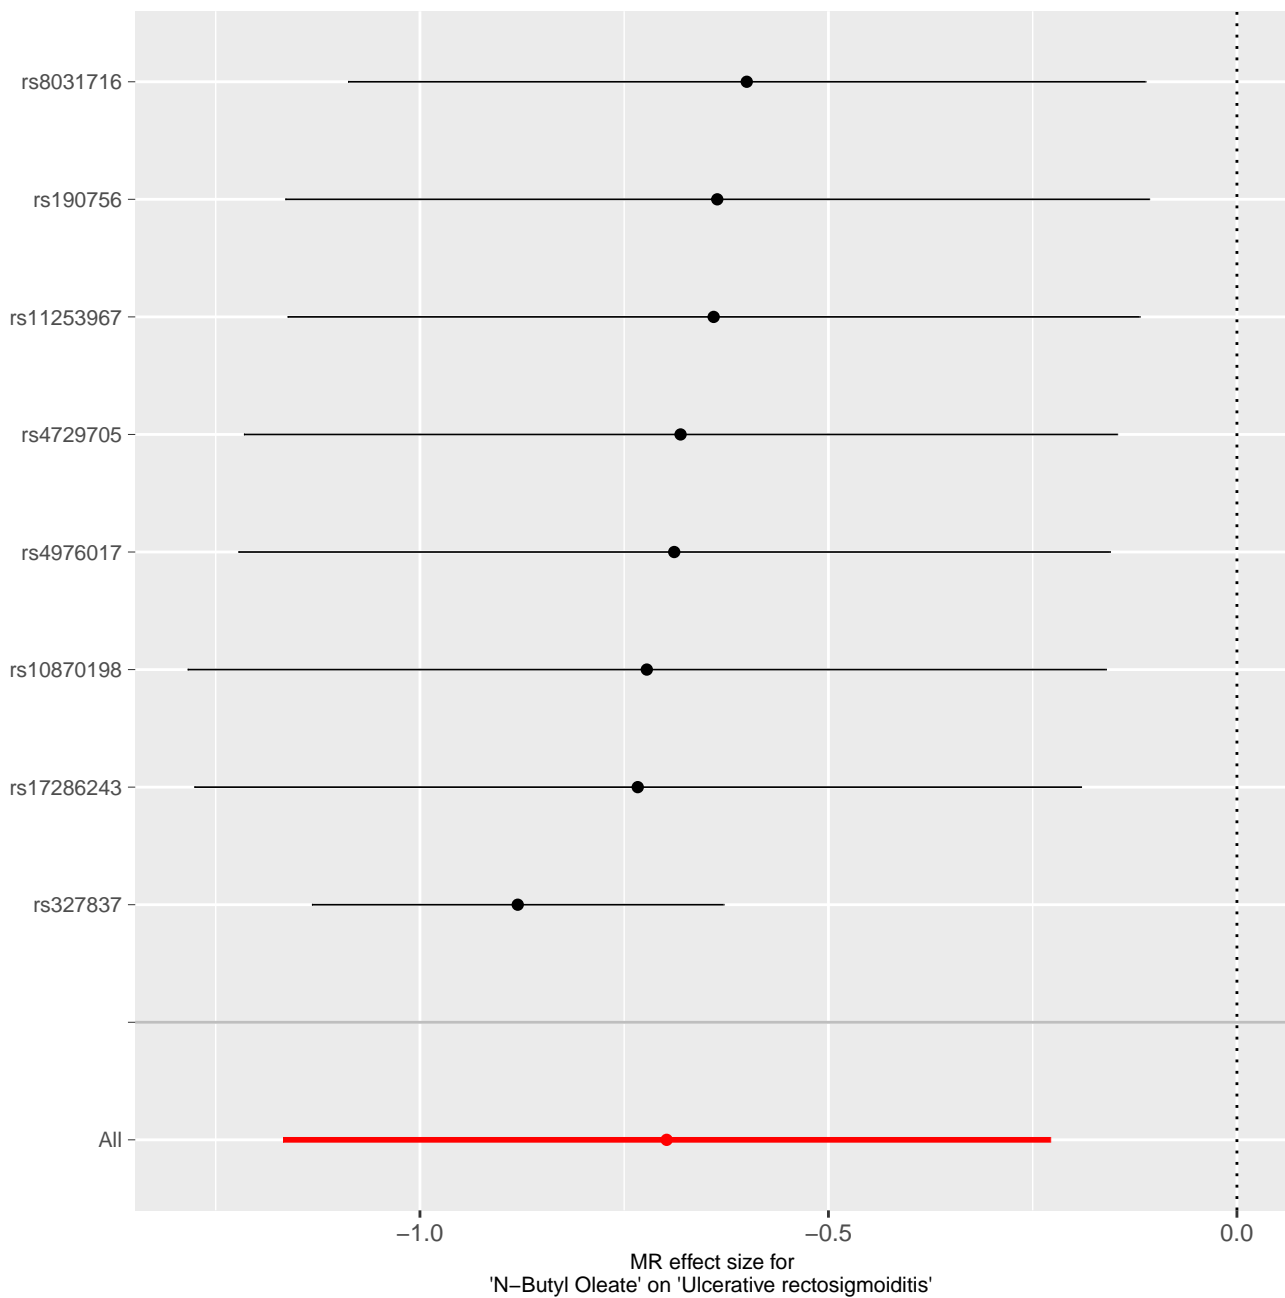



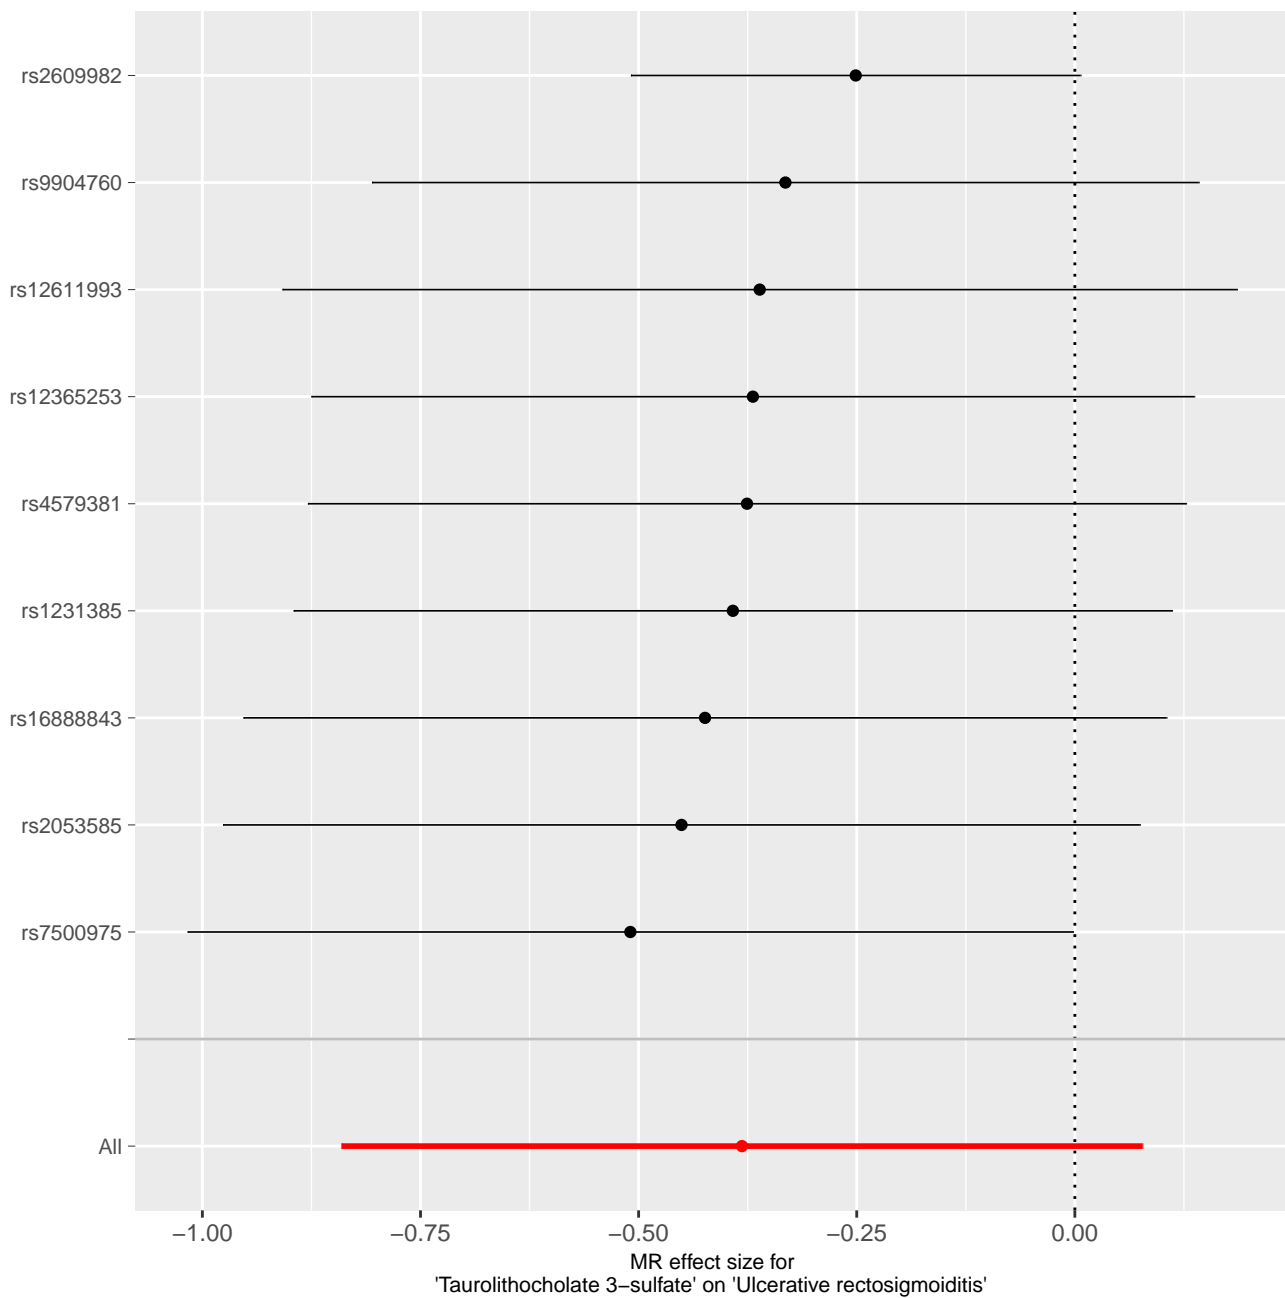

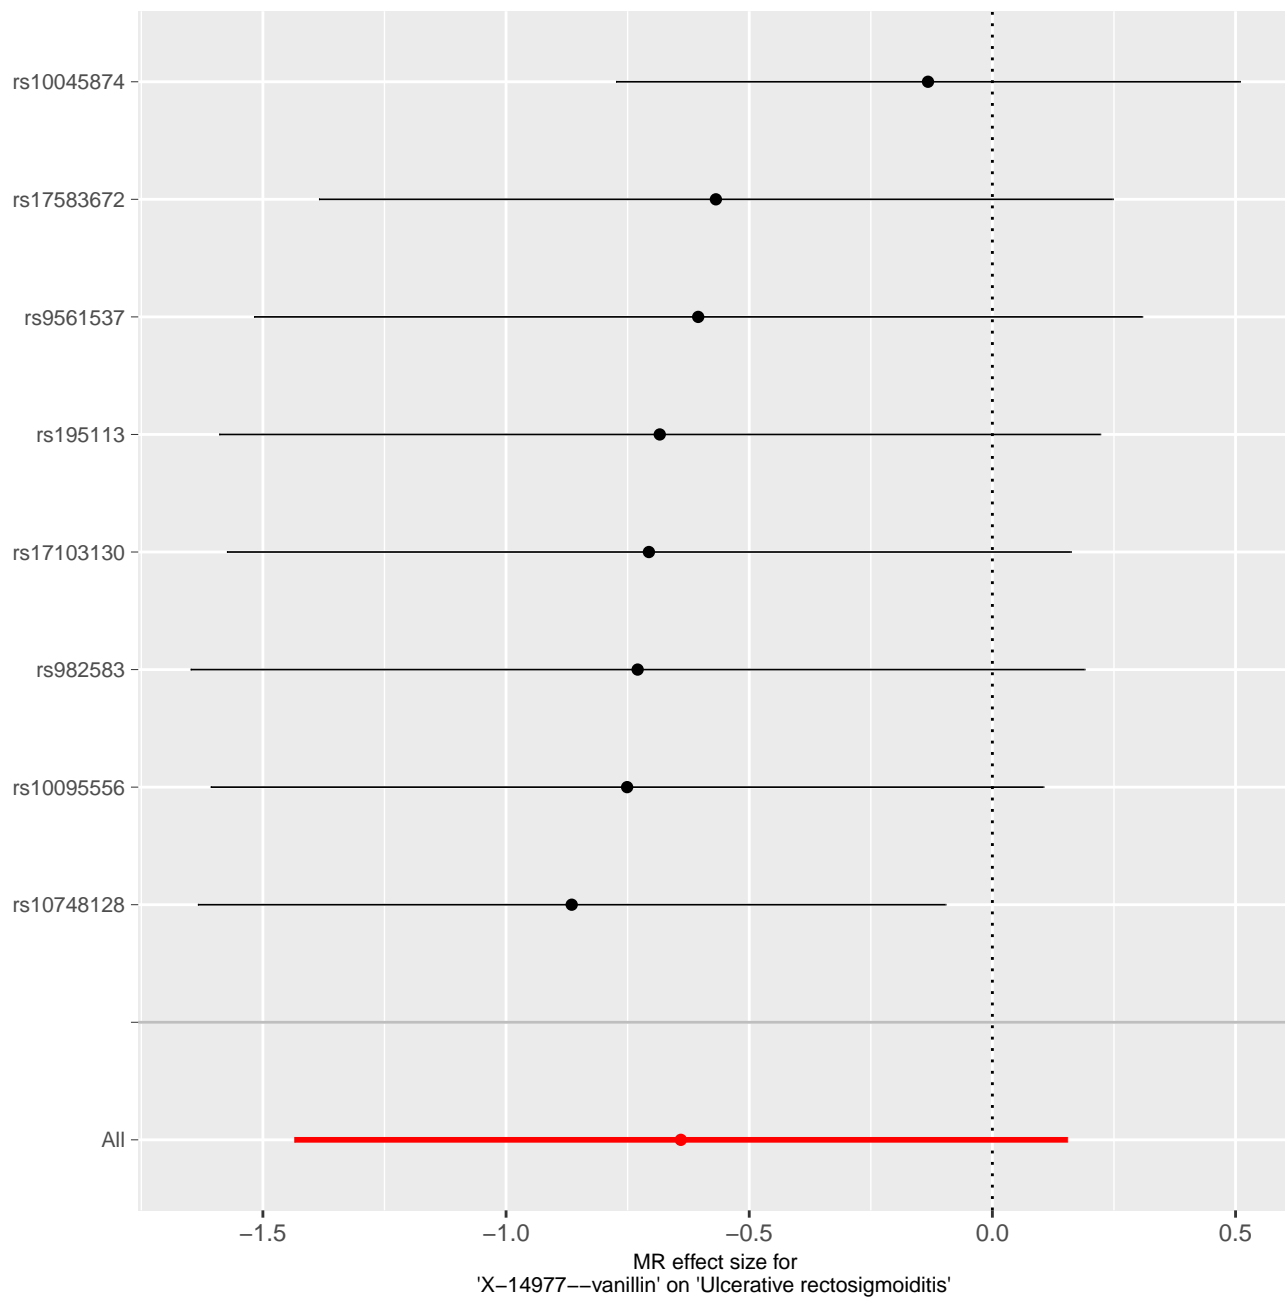

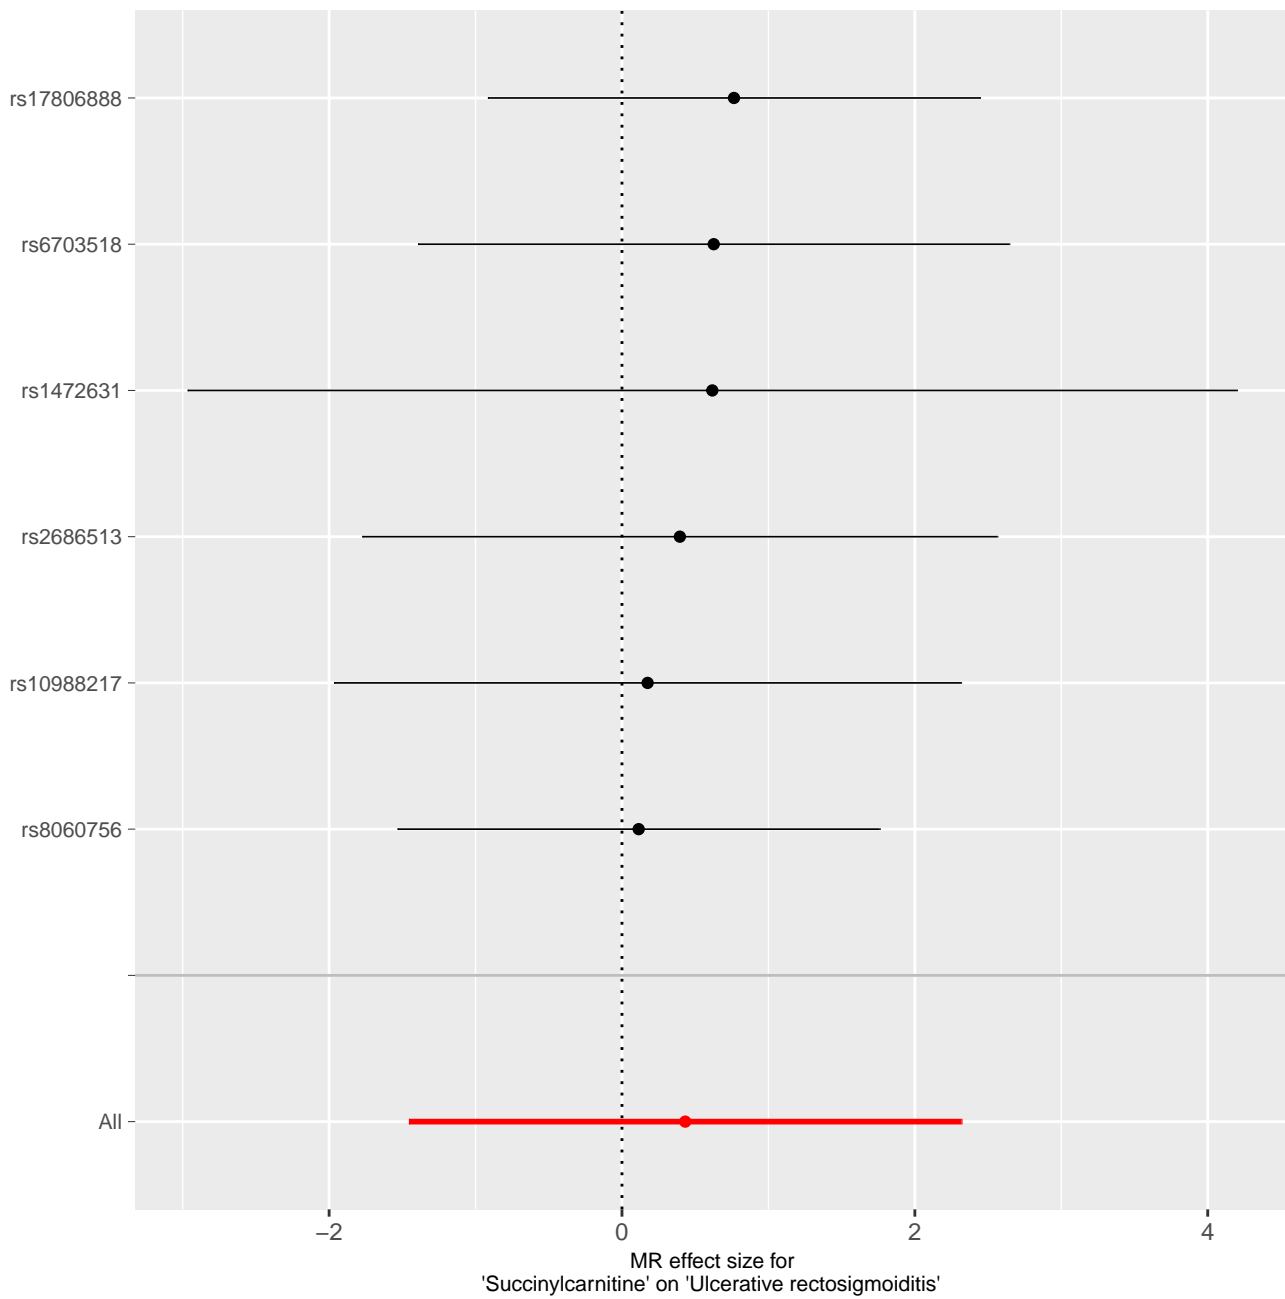

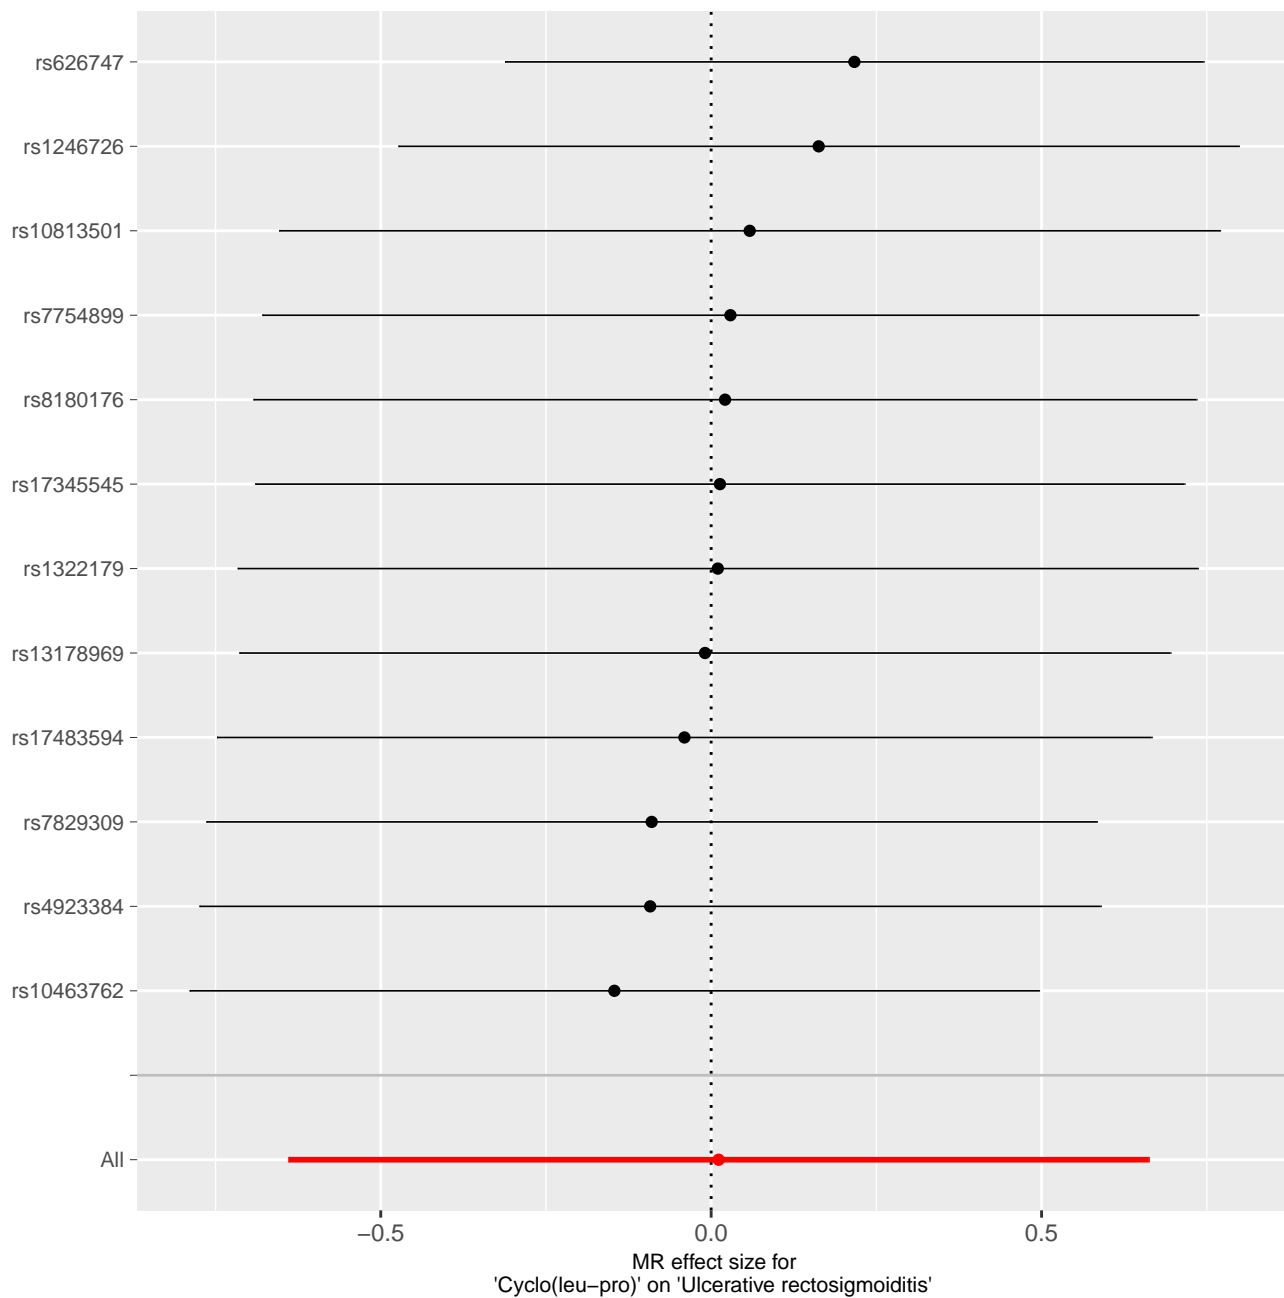

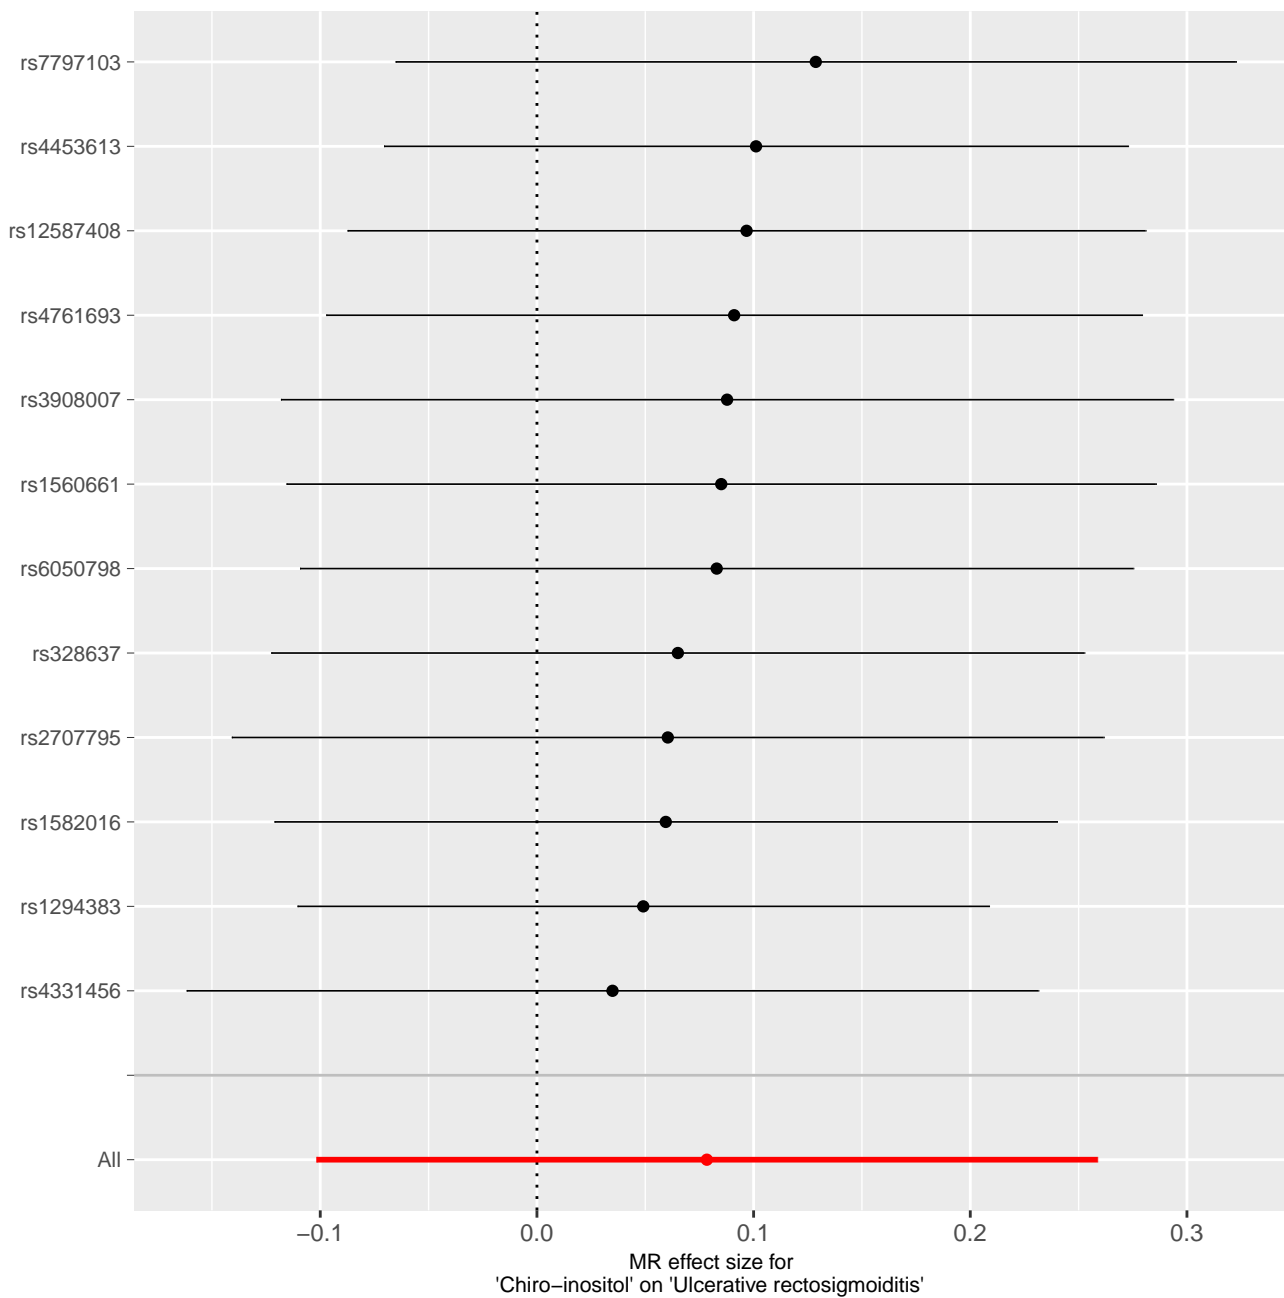

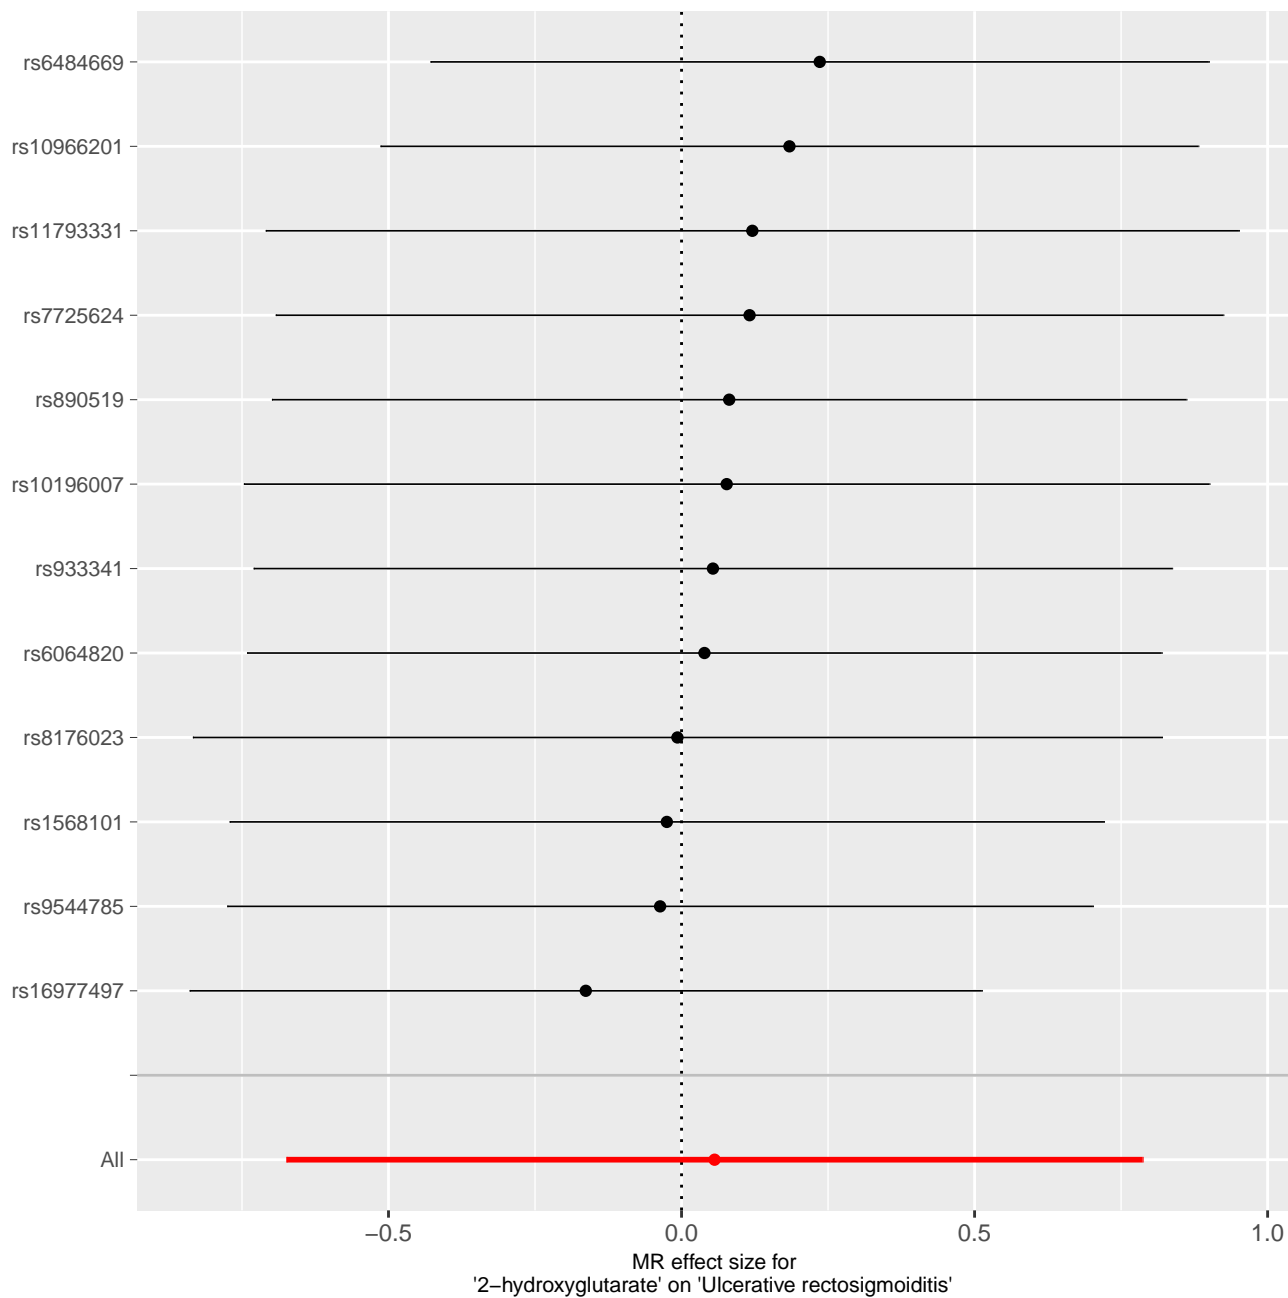

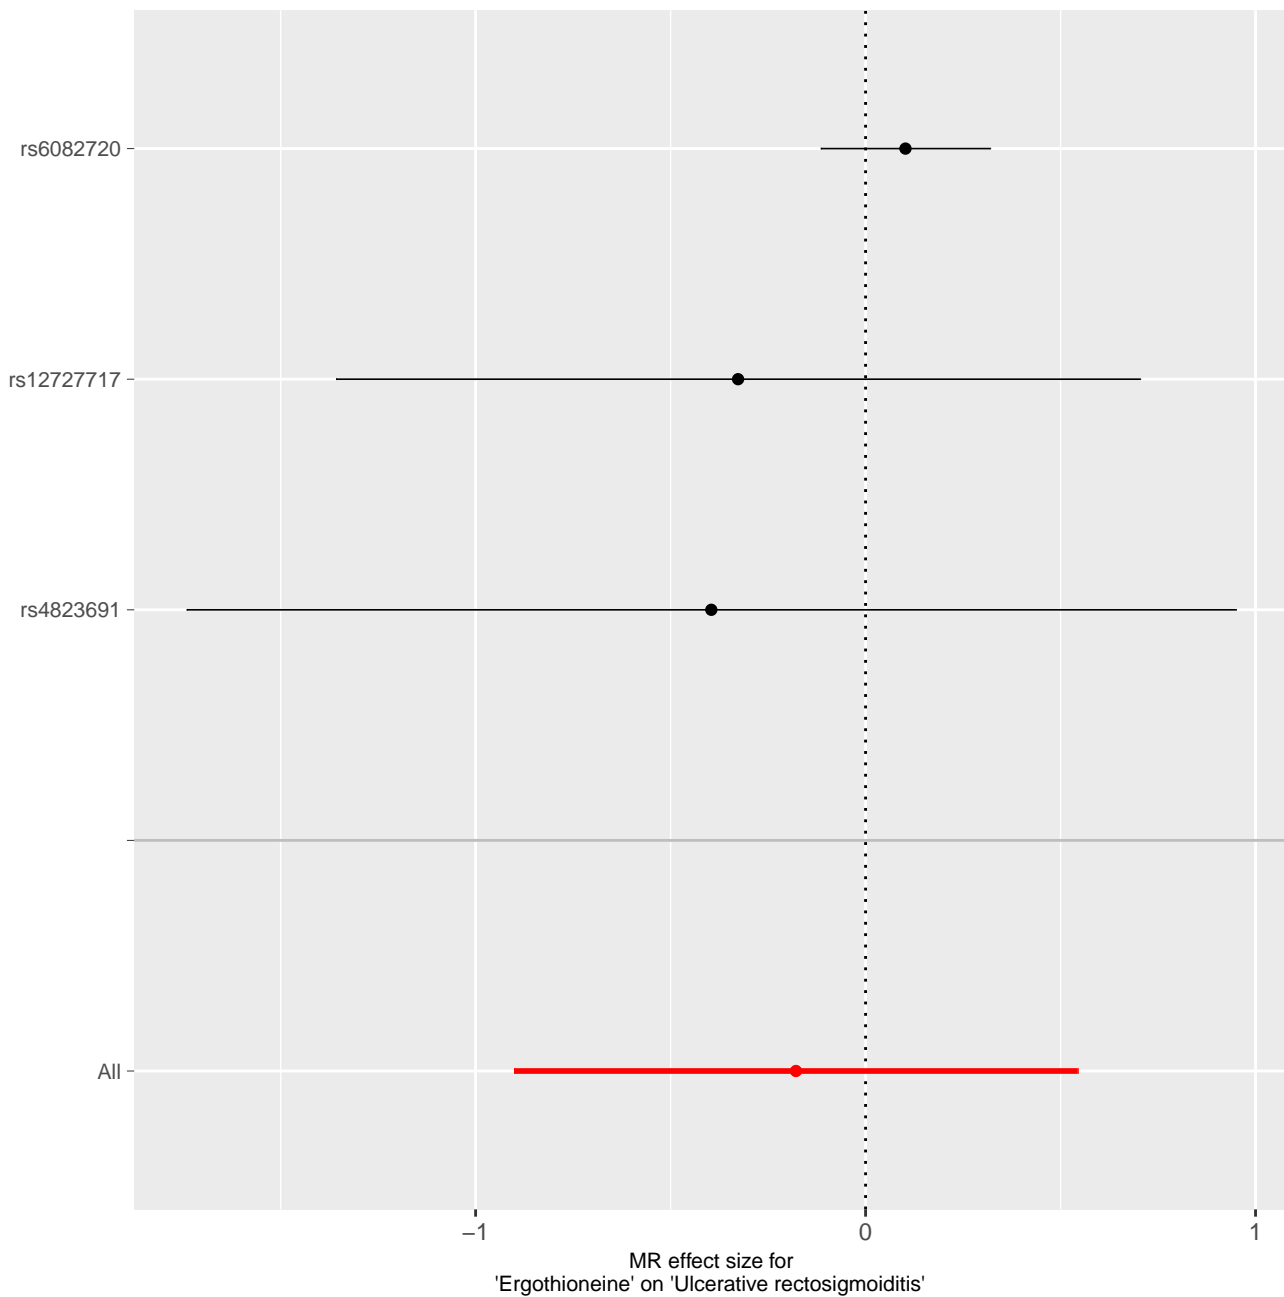

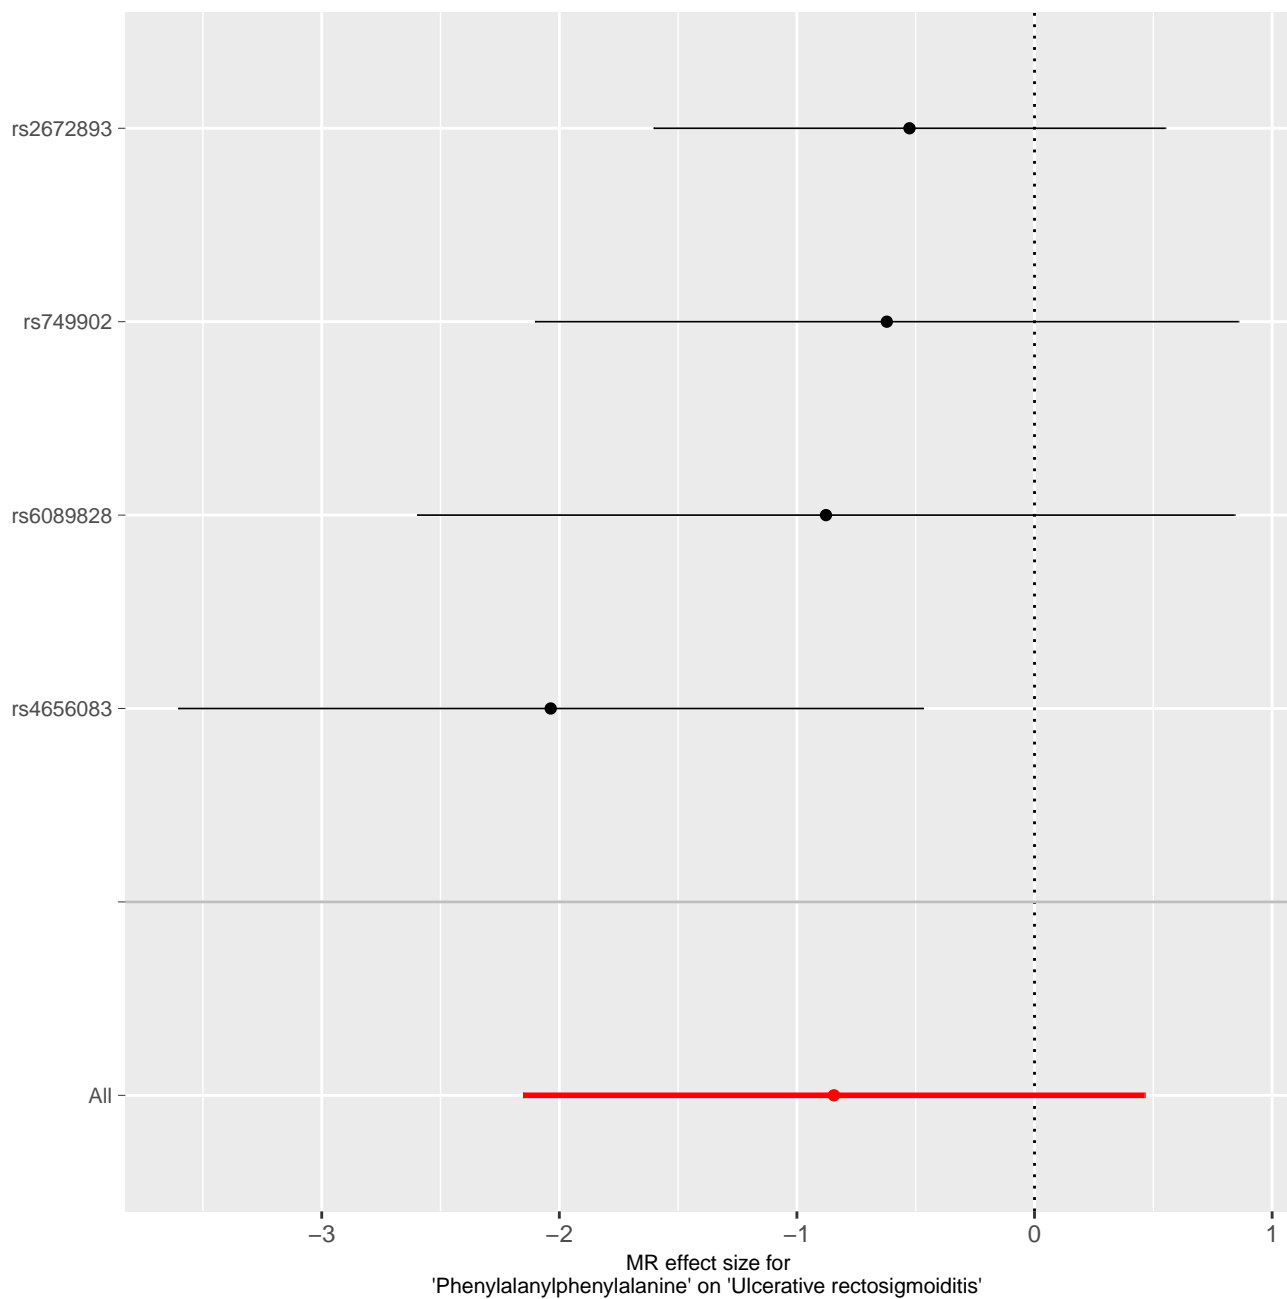



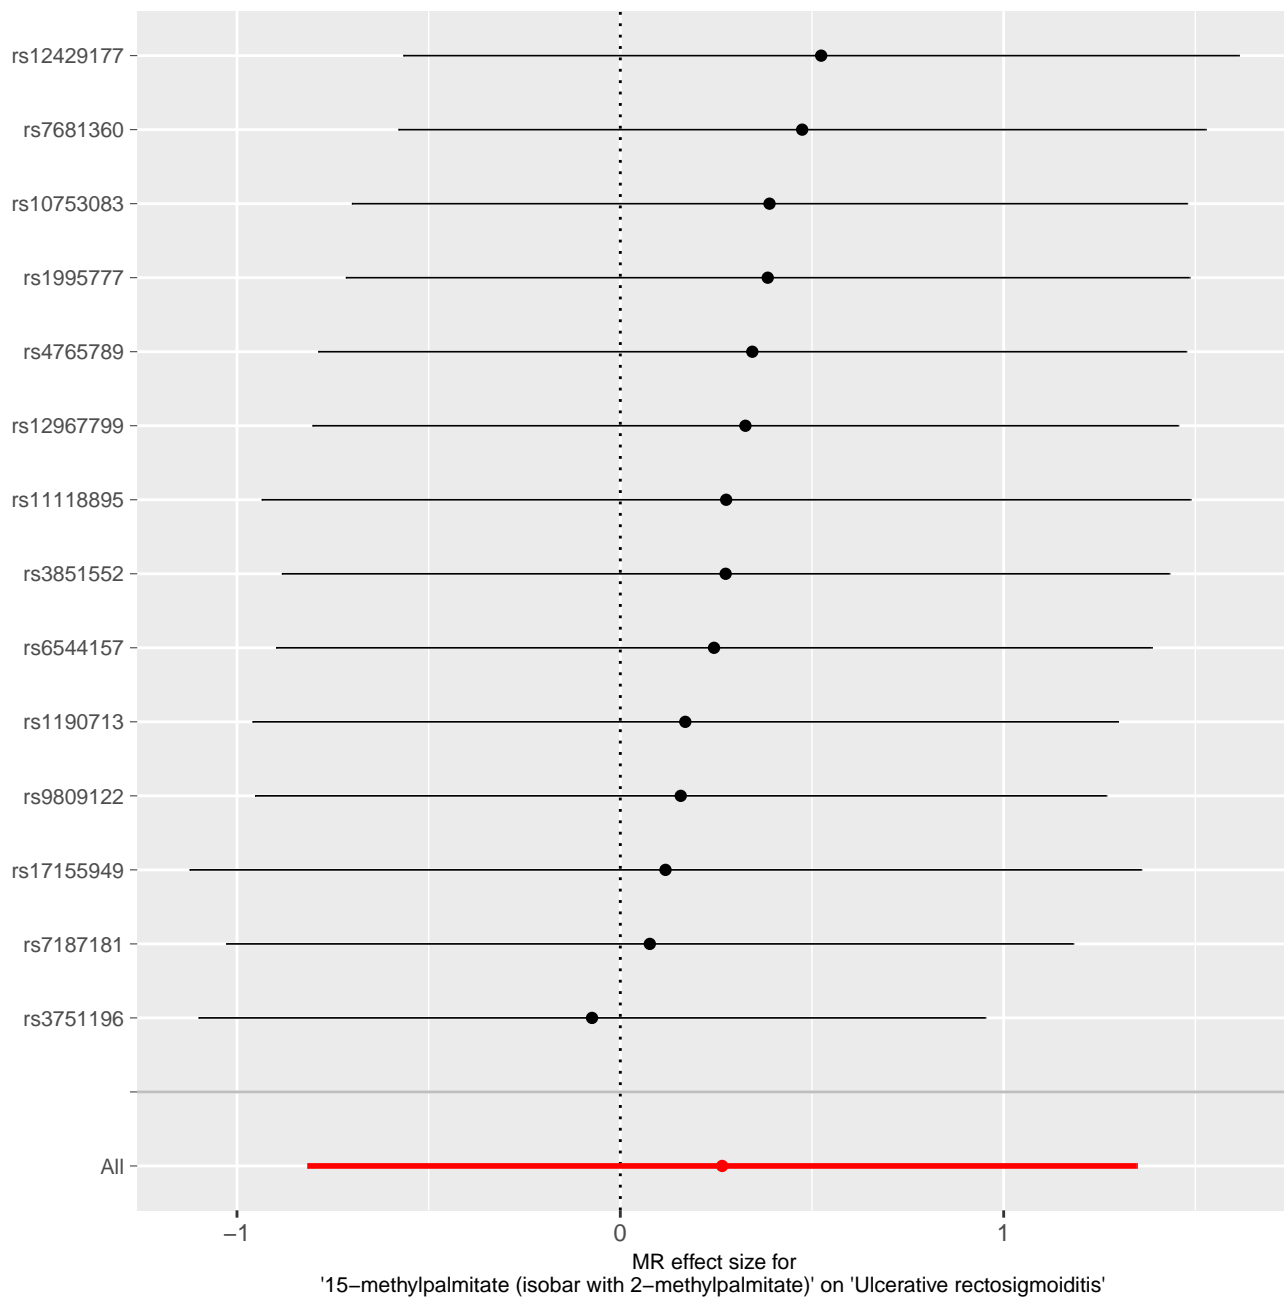

Supplement: Data_Sheet_3.PDF [file Data_Sheet_3.PDF]
