# Supplementary material for: From serum metabolites to the gut: revealing metabolic clues to susceptibility to subtypes of Crohn’s disease and ulcerative colitis
Source: Front Endocrinol (Lausanne). 2024 Aug 8;15:1375896. doi: 10.3389/fendo.2024.1375896 (PMC11338916; doi:10.3389/fendo.2024.1375896)
Supplement: Supplementary Table 1 — Dataset information included in MR studies. [file Table_1.xlsx]

## Sheet: 1
Supplementary Table 1. Dataset information included in MR studies
Note: Trait, Phenotype of the dataset; Ncase, Number of cases; Ncontrol, Number of controls; Nsnp, Number of available SNPs; GMPW, Gut microbiota pathway.
Trait	Ncase	SampleSize	Year	Authors	Sex	Population	Unit	Nsnp	Download link	MRCIEU-ID
Crohn's disease of colon	1581	361508	2023	FINNGEN	Males and Females	European	Odds Ratio	20167370	https://storage.googleapis.com/finngen-public-data-r9/summary_stats/finngen_R9_CHRONLARGE.gz	-
Crohn's disease of ileocolon	2098	362025	2023	FINNGEN	Males and Females	European	Odds Ratio	20167370	https://storage.googleapis.com/finngen-public-data-r9/summary_stats/finngen_R9_CHRONOTH.gz	-
Crohn's disease of small intestine	2004	361931	2023	FINNGEN	Males and Females	European	Odds Ratio	20167370	https://storage.googleapis.com/finngen-public-data-r9/summary_stats/finngen_R9_CHRONSMALL.gz	-
Arthropathy in Crohn disease	273	373819	2023	FINNGEN	Males and Females	European	Odds Ratio	20167370	https://storage.googleapis.com/finngen-public-data-r9/summary_stats/finngen_R9_CROHN_ARTHR.gz	-
Ulcerative colitis with PSC	209	364784	2023	FINNGEN	Males and Females	European	Odds Ratio	20167370	https://storage.googleapis.com/finngen-public-data-r9/summary_stats/finngen_R9_K11_UC_STRICT_PSC.gz	-
Left-sided ulcerative colitis	4085	364012	2023	FINNGEN	Males and Females	European	Odds Ratio	20167370	https://storage.googleapis.com/finngen-public-data-r9/summary_stats/finngen_R9_ULCER_ARTHR.gz	-
Arthropathy in ulcerative colitis	336	373882	2023	FINNGEN	Males and Females	European	Odds Ratio	20167370	https://storage.googleapis.com/finngen-public-data-r9/summary_stats/finngen_R9_ULCERENTER.gz	-
Ulcerative pancolitis	933	360860	2023	FINNGEN	Males and Females	European	Odds Ratio	20167370	https://storage.googleapis.com/finngen-public-data-r9/summary_stats/finngen_R9_ULCERPROCT .gz	-
Ulcerative proctitis	1773	361700	2023	FINNGEN	Males and Females	European	Odds Ratio	20167370	https://storage.googleapis.com/finngen-public-data-r9/summary_stats/finngen_R9_ULCERRECT.gz	-
Ulcerative rectosigmoiditis	2487	362414	2023	FINNGEN	Males and Females	European	Odds Ratio	20167370	https://storage.googleapis.com/finngen-public-data-r9/summary_stats/finngen_R9_MUCOPROCT.gz	-
Glutamine	7821	7821	2014	Shin et al.	Males and Females	European	log10 units	2545661	https://gwas.mrcieu.ac.uk/files/met-a-303/met-a-303.vcf.gz	met-a-303
Tryptophan	7804	7804	2014	Shin et al.	Males and Females	European	log10 units	2545641	https://gwas.mrcieu.ac.uk/files/met-a-304/met-a-304.vcf.gz	met-a-304
Histidine	7804	7804	2014	Shin et al.	Males and Females	European	log10 units	2545665	https://gwas.mrcieu.ac.uk/files/met-a-305/met-a-305.vcf.gz	met-a-305
Leucine	7799	7799	2014	Shin et al.	Males and Females	European	log10 units	2545655	https://gwas.mrcieu.ac.uk/files/met-a-306/met-a-306.vcf.gz	met-a-306
Cholesterol	7813	7813	2014	Shin et al.	Males and Females	European	log10 units	2545608	https://gwas.mrcieu.ac.uk/files/met-a-307/met-a-307.vcf.gz	met-a-307
Phenylalanine	7803	7803	2014	Shin et al.	Males and Females	European	log10 units	2545599	https://gwas.mrcieu.ac.uk/files/met-a-308/met-a-308.vcf.gz	met-a-308
Creatinine	7810	7810	2014	Shin et al.	Males and Females	European	log10 units	2545671	https://gwas.mrcieu.ac.uk/files/met-a-309/met-a-309.vcf.gz	met-a-309
Lactate	7814	7814	2014	Shin et al.	Males and Females	European	log10 units	2545582	https://gwas.mrcieu.ac.uk/files/met-a-310/met-a-310.vcf.gz	met-a-310
3-hydroxybutyrate (BHBA)	7820	7820	2014	Shin et al.	Males and Females	European	log10 units	2545615	https://gwas.mrcieu.ac.uk/files/met-a-311/met-a-311.vcf.gz	met-a-311
Arabinose	5889	5889	2014	Shin et al.	Males and Females	European	log10 units	2545100	https://gwas.mrcieu.ac.uk/files/met-a-312/met-a-312.vcf.gz	met-a-312
Fructose	7781	7781	2014	Shin et al.	Males and Females	European	log10 units	2545462	https://gwas.mrcieu.ac.uk/files/met-a-313/met-a-313.vcf.gz	met-a-313
Mannose	7793	7793	2014	Shin et al.	Males and Females	European	log10 units	2545645	https://gwas.mrcieu.ac.uk/files/met-a-314/met-a-314.vcf.gz	met-a-314
Pyruvate	7682	7682	2014	Shin et al.	Males and Females	European	log10 units	2545596	https://gwas.mrcieu.ac.uk/files/met-a-315/met-a-315.vcf.gz	met-a-315
Uridine	7800	7800	2014	Shin et al.	Males and Females	European	log10 units	2545676	https://gwas.mrcieu.ac.uk/files/met-a-316/met-a-316.vcf.gz	met-a-316
Linoleate (18:2n6)	7780	7780	2014	Shin et al.	Males and Females	European	log10 units	2545642	https://gwas.mrcieu.ac.uk/files/met-a-317/met-a-317.vcf.gz	met-a-317
Allantoin	5705	5705	2014	Shin et al.	Males and Females	European	log10 units	2542981	https://gwas.mrcieu.ac.uk/files/met-a-318/met-a-318.vcf.gz	met-a-318
Arachidonate (20:4n6)	7816	7816	2014	Shin et al.	Males and Females	European	log10 units	2545690	https://gwas.mrcieu.ac.uk/files/met-a-319/met-a-319.vcf.gz	met-a-319
Deoxycholate	5194	5194	2014	Shin et al.	Males and Females	European	log10 units	2546027	https://gwas.mrcieu.ac.uk/files/met-a-320/met-a-320.vcf.gz	met-a-320
Margarate (17:0)	7796	7796	2014	Shin et al.	Males and Females	European	log10 units	2545661	https://gwas.mrcieu.ac.uk/files/met-a-321/met-a-321.vcf.gz	met-a-321
Inosine	2675	2675	2014	Shin et al.	Males and Females	European	log10 units	2545601	https://gwas.mrcieu.ac.uk/files/met-a-322/met-a-322.vcf.gz	met-a-322
Isoleucine	7801	7801	2014	Shin et al.	Males and Females	European	log10 units	2545655	https://gwas.mrcieu.ac.uk/files/met-a-323/met-a-323.vcf.gz	met-a-323
Threonine	6020	6020	2014	Shin et al.	Males and Females	European	log10 units	2545896	https://gwas.mrcieu.ac.uk/files/met-a-324/met-a-324.vcf.gz	met-a-324
Tyrosine	7807	7807	2014	Shin et al.	Males and Females	European	log10 units	2545613	https://gwas.mrcieu.ac.uk/files/met-a-325/met-a-325.vcf.gz	met-a-325
Lysine	7812	7812	2014	Shin et al.	Males and Females	European	log10 units	2545686	https://gwas.mrcieu.ac.uk/files/met-a-326/met-a-326.vcf.gz	met-a-326
Methionine	7795	7795	2014	Shin et al.	Males and Females	European	log10 units	2545691	https://gwas.mrcieu.ac.uk/files/met-a-327/met-a-327.vcf.gz	met-a-327
Malate	7384	7384	2014	Shin et al.	Males and Females	European	log10 units	2545374	https://gwas.mrcieu.ac.uk/files/met-a-328/met-a-328.vcf.gz	met-a-328
Palmitate (16:0)	7800	7800	2014	Shin et al.	Males and Females	European	log10 units	2545680	https://gwas.mrcieu.ac.uk/files/met-a-329/met-a-329.vcf.gz	met-a-329
Nonadecanoate (19:0)	7783	7783	2014	Shin et al.	Males and Females	European	log10 units	2545571	https://gwas.mrcieu.ac.uk/files/met-a-330/met-a-330.vcf.gz	met-a-330
Stearate (18:0)	7803	7803	2014	Shin et al.	Males and Females	European	log10 units	2545698	https://gwas.mrcieu.ac.uk/files/met-a-331/met-a-331.vcf.gz	met-a-331
Oleate (18:1n9)	7768	7768	2014	Shin et al.	Males and Females	European	log10 units	2545670	https://gwas.mrcieu.ac.uk/files/met-a-332/met-a-332.vcf.gz	met-a-332
Pentadecanoate (15:0)	7502	7502	2014	Shin et al.	Males and Females	European	log10 units	2545826	https://gwas.mrcieu.ac.uk/files/met-a-333/met-a-333.vcf.gz	met-a-333
Myristate (14:0)	7811	7811	2014	Shin et al.	Males and Females	European	log10 units	2545661	https://gwas.mrcieu.ac.uk/files/met-a-334/met-a-334.vcf.gz	met-a-334
Pipecolate	7792	7792	2014	Shin et al.	Males and Females	European	log10 units	2545476	https://gwas.mrcieu.ac.uk/files/met-a-335/met-a-335.vcf.gz	met-a-335
Ornithine	7746	7746	2014	Shin et al.	Males and Females	European	log10 units	2545669	https://gwas.mrcieu.ac.uk/files/met-a-336/met-a-336.vcf.gz	met-a-336
5-oxoproline	7802	7802	2014	Shin et al.	Males and Females	European	log10 units	2545584	https://gwas.mrcieu.ac.uk/files/met-a-337/met-a-337.vcf.gz	met-a-337
Pantothenate	7604	7604	2014	Shin et al.	Males and Females	European	log10 units	2545928	https://gwas.mrcieu.ac.uk/files/met-a-338/met-a-338.vcf.gz	met-a-338
4-acetamidobutanoate	6930	6930	2014	Shin et al.	Males and Females	European	log10 units	2545566	https://gwas.mrcieu.ac.uk/files/met-a-339/met-a-339.vcf.gz	met-a-339
Alpha-tocopherol	7725	7725	2014	Shin et al.	Males and Females	European	log10 units	2545636	https://gwas.mrcieu.ac.uk/files/met-a-340/met-a-340.vcf.gz	met-a-340
Citrate	7813	7813	2014	Shin et al.	Males and Females	European	log10 units	2545557	https://gwas.mrcieu.ac.uk/files/met-a-341/met-a-341.vcf.gz	met-a-341
Glycerate	7778	7778	2014	Shin et al.	Males and Females	European	log10 units	2545821	https://gwas.mrcieu.ac.uk/files/met-a-342/met-a-342.vcf.gz	met-a-342
Guanosine	2343	2343	2014	Shin et al.	Males and Females	European	log10 units	2545643	https://gwas.mrcieu.ac.uk/files/met-a-343/met-a-343.vcf.gz	met-a-343
N-acetylalanine	7720	7720	2014	Shin et al.	Males and Females	European	log10 units	2546012	https://gwas.mrcieu.ac.uk/files/met-a-344/met-a-344.vcf.gz	met-a-344
Urate	7819	7819	2014	Shin et al.	Males and Females	European	log10 units	2545644	https://gwas.mrcieu.ac.uk/files/met-a-345/met-a-345.vcf.gz	met-a-345
Ursodeoxycholate	5477	5477	2014	Shin et al.	Males and Females	European	log10 units	2543395	https://gwas.mrcieu.ac.uk/files/met-a-346/met-a-346.vcf.gz	met-a-346
Arginine	7528	7528	2014	Shin et al.	Males and Females	European	log10 units	2545579	https://gwas.mrcieu.ac.uk/files/met-a-347/met-a-347.vcf.gz	met-a-347
Ascorbate (Vitamin C)	2085	2085	2014	Shin et al.	Males and Females	European	log10 units	2545101	https://gwas.mrcieu.ac.uk/files/met-a-348/met-a-348.vcf.gz	met-a-348
Heptanoate (7:0)	7802	7802	2014	Shin et al.	Males and Females	European	log10 units	2545680	https://gwas.mrcieu.ac.uk/files/met-a-349/met-a-349.vcf.gz	met-a-349
Laurate (12:0)	7793	7793	2014	Shin et al.	Males and Females	European	log10 units	2545672	https://gwas.mrcieu.ac.uk/files/met-a-350/met-a-350.vcf.gz	met-a-350
Valine	7808	7808	2014	Shin et al.	Males and Females	European	log10 units	2545654	https://gwas.mrcieu.ac.uk/files/met-a-351/met-a-351.vcf.gz	met-a-351
Urea	7796	7796	2014	Shin et al.	Males and Females	European	log10 units	2545595	https://gwas.mrcieu.ac.uk/files/met-a-352/met-a-352.vcf.gz	met-a-352
Cortisol	7795	7795	2014	Shin et al.	Males and Females	European	log10 units	2545612	https://gwas.mrcieu.ac.uk/files/met-a-353/met-a-353.vcf.gz	met-a-353
Cortisone	7575	7575	2014	Shin et al.	Males and Females	European	log10 units	2545383	https://gwas.mrcieu.ac.uk/files/met-a-354/met-a-354.vcf.gz	met-a-354
Proline	7816	7816	2014	Shin et al.	Males and Females	European	log10 units	2545669	https://gwas.mrcieu.ac.uk/files/met-a-355/met-a-355.vcf.gz	met-a-355
Citrulline	7773	7773	2014	Shin et al.	Males and Females	European	log10 units	2545760	https://gwas.mrcieu.ac.uk/files/met-a-356/met-a-356.vcf.gz	met-a-356
Biliverdin	6686	6686	2014	Shin et al.	Males and Females	European	log10 units	2544635	https://gwas.mrcieu.ac.uk/files/met-a-357/met-a-357.vcf.gz	met-a-357
Serotonin (5HT)	6139	6139	2014	Shin et al.	Males and Females	European	log10 units	2545835	https://gwas.mrcieu.ac.uk/files/met-a-358/met-a-358.vcf.gz	met-a-358
Gamma-glutamylglutamine	7662	7662	2014	Shin et al.	Males and Females	European	log10 units	2545682	https://gwas.mrcieu.ac.uk/files/met-a-359/met-a-359.vcf.gz	met-a-359
Gamma-glutamyltyrosine	7468	7468	2014	Shin et al.	Males and Females	European	log10 units	2545559	https://gwas.mrcieu.ac.uk/files/met-a-360/met-a-360.vcf.gz	met-a-360
Hypoxanthine	7287	7287	2014	Shin et al.	Males and Females	European	log10 units	2545756	https://gwas.mrcieu.ac.uk/files/met-a-361/met-a-361.vcf.gz	met-a-361
Betaine	7806	7806	2014	Shin et al.	Males and Females	European	log10 units	2545684	https://gwas.mrcieu.ac.uk/files/met-a-362/met-a-362.vcf.gz	met-a-362
Xanthine	6845	6845	2014	Shin et al.	Males and Females	European	log10 units	2545938	https://gwas.mrcieu.ac.uk/files/met-a-363/met-a-363.vcf.gz	met-a-363
Phosphate	7789	7789	2014	Shin et al.	Males and Females	European	log10 units	2545586	https://gwas.mrcieu.ac.uk/files/met-a-364/met-a-364.vcf.gz	met-a-364
3-methoxytyrosine	5997	5997	2014	Shin et al.	Males and Females	European	log10 units	2544787	https://gwas.mrcieu.ac.uk/files/met-a-365/met-a-365.vcf.gz	met-a-365
Pelargonate (9:0)	7803	7803	2014	Shin et al.	Males and Females	European	log10 units	2545686	https://gwas.mrcieu.ac.uk/files/met-a-366/met-a-366.vcf.gz	met-a-366
Undecanoate (11:0)	7500	7500	2014	Shin et al.	Males and Females	European	log10 units	2545844	https://gwas.mrcieu.ac.uk/files/met-a-367/met-a-367.vcf.gz	met-a-367
Beta-hydroxyisovalerate	7283	7283	2014	Shin et al.	Males and Females	European	log10 units	2545179	https://gwas.mrcieu.ac.uk/files/met-a-368/met-a-368.vcf.gz	met-a-368
Taurodeoxycholate	1564	1564	2014	Shin et al.	Males and Females	European	log10 units	2545263	https://gwas.mrcieu.ac.uk/files/met-a-369/met-a-369.vcf.gz	met-a-369
Glycerol	7800	7800	2014	Shin et al.	Males and Females	European	log10 units	2545492	https://gwas.mrcieu.ac.uk/files/met-a-374/met-a-374.vcf.gz	met-a-374
Kynurenine	7816	7816	2014	Shin et al.	Males and Females	European	log10 units	2545666	https://gwas.mrcieu.ac.uk/files/met-a-375/met-a-375.vcf.gz	met-a-375
Mannitol	5917	5917	2014	Shin et al.	Males and Females	European	log10 units	2545531	https://gwas.mrcieu.ac.uk/files/met-a-376/met-a-376.vcf.gz	met-a-376
Glycerol 3-phosphate (G3P)	7781	7781	2014	Shin et al.	Males and Females	European	log10 units	2545634	https://gwas.mrcieu.ac.uk/files/met-a-377/met-a-377.vcf.gz	met-a-377
Acetylphosphate	7789	7789	2014	Shin et al.	Males and Females	European	log10 units	2545589	https://gwas.mrcieu.ac.uk/files/met-a-378/met-a-378.vcf.gz	met-a-378
Carnitine	7797	7797	2014	Shin et al.	Males and Females	European	log10 units	2545563	https://gwas.mrcieu.ac.uk/files/met-a-379/met-a-379.vcf.gz	met-a-379
Choline	7750	7750	2014	Shin et al.	Males and Females	European	log10 units	2545597	https://gwas.mrcieu.ac.uk/files/met-a-380/met-a-380.vcf.gz	met-a-380
N-acetylornithine	7574	7574	2014	Shin et al.	Males and Females	European	log10 units	2545364	https://gwas.mrcieu.ac.uk/files/met-a-381/met-a-381.vcf.gz	met-a-381
N1-methyladenosine	7813	7813	2014	Shin et al.	Males and Females	European	log10 units	2545622	https://gwas.mrcieu.ac.uk/files/met-a-382/met-a-382.vcf.gz	met-a-382
3-methyl-2-oxovalerate	7779	7779	2014	Shin et al.	Males and Females	European	log10 units	2545685	https://gwas.mrcieu.ac.uk/files/met-a-383/met-a-383.vcf.gz	met-a-383
3-methylhistidine	5885	5885	2014	Shin et al.	Males and Females	European	log10 units	2543426	https://gwas.mrcieu.ac.uk/files/met-a-384/met-a-384.vcf.gz	met-a-384
3-phenylpropionate (hydrocinnamate)	6182	6182	2014	Shin et al.	Males and Females	European	log10 units	2544465	https://gwas.mrcieu.ac.uk/files/met-a-385/met-a-385.vcf.gz	met-a-385
Phenylacetate	4754	4754	2014	Shin et al.	Males and Females	European	log10 units	2544277	https://gwas.mrcieu.ac.uk/files/met-a-386/met-a-386.vcf.gz	met-a-386
Glycerophosphorylcholine (GPC)	7156	7156	2014	Shin et al.	Males and Females	European	log10 units	2545468	https://gwas.mrcieu.ac.uk/files/met-a-387/met-a-387.vcf.gz	met-a-387
Aspartate	7721	7721	2014	Shin et al.	Males and Females	European	log10 units	2545425	https://gwas.mrcieu.ac.uk/files/met-a-388/met-a-388.vcf.gz	met-a-388
X-04499--3,4-dihydroxybutyrate	6948	6948	2014	Shin et al.	Males and Females	European	log10 units	2545613	https://gwas.mrcieu.ac.uk/files/met-a-393/met-a-393.vcf.gz	met-a-393
Dihomo-linoleate (20:2n6)	7800	7800	2014	Shin et al.	Males and Females	European	log10 units	2545669	https://gwas.mrcieu.ac.uk/files/met-a-395/met-a-395.vcf.gz	met-a-395
2-hydroxystearate	7763	7763	2014	Shin et al.	Males and Females	European	log10 units	2545671	https://gwas.mrcieu.ac.uk/files/met-a-397/met-a-397.vcf.gz	met-a-397
Indolelactate	7378	7378	2014	Shin et al.	Males and Females	European	log10 units	2546166	https://gwas.mrcieu.ac.uk/files/met-a-399/met-a-399.vcf.gz	met-a-399
Glycylvaline	2108	2108	2014	Shin et al.	Males and Females	European	log10 units	2545247	https://gwas.mrcieu.ac.uk/files/met-a-400/met-a-400.vcf.gz	met-a-400
Gamma-glutamylleucine	7802	7802	2014	Shin et al.	Males and Females	European	log10 units	2545647	https://gwas.mrcieu.ac.uk/files/met-a-401/met-a-401.vcf.gz	met-a-401
Eicosapentaenoate (EPA; 20:5n3)	7816	7816	2014	Shin et al.	Males and Females	European	log10 units	2545634	https://gwas.mrcieu.ac.uk/files/met-a-402/met-a-402.vcf.gz	met-a-402
Estrone 3-sulfate	957	957	2014	Shin et al.	Males and Females	European	log10 units	2542633	https://gwas.mrcieu.ac.uk/files/met-a-403/met-a-403.vcf.gz	met-a-403
Glycocholate	5995	5995	2014	Shin et al.	Males and Females	European	log10 units	2545954	https://gwas.mrcieu.ac.uk/files/met-a-404/met-a-404.vcf.gz	met-a-404
Glycodeoxycholate	1477	1477	2014	Shin et al.	Males and Females	European	log10 units	2544647	https://gwas.mrcieu.ac.uk/files/met-a-405/met-a-405.vcf.gz	met-a-405
Taurochenodeoxycholate	5716	5716	2014	Shin et al.	Males and Females	European	log10 units	2546774	https://gwas.mrcieu.ac.uk/files/met-a-406/met-a-406.vcf.gz	met-a-406
Taurocholate	4032	4032	2014	Shin et al.	Males and Females	European	log10 units	2545866	https://gwas.mrcieu.ac.uk/files/met-a-407/met-a-407.vcf.gz	met-a-407
Docosahexaenoate (DHA; 22:6n3)	7818	7818	2014	Shin et al.	Males and Females	European	log10 units	2545635	https://gwas.mrcieu.ac.uk/files/met-a-409/met-a-409.vcf.gz	met-a-409
1-stearoylglycerophosphoinositol	7694	7694	2014	Shin et al.	Males and Females	European	log10 units	2545589	https://gwas.mrcieu.ac.uk/files/met-a-410/met-a-410.vcf.gz	met-a-410
Myo-inositol	7803	7803	2014	Shin et al.	Males and Females	European	log10 units	2545559	https://gwas.mrcieu.ac.uk/files/met-a-417/met-a-417.vcf.gz	met-a-417
Glucose	7773	7773	2014	Shin et al.	Males and Females	European	log10 units	2545599	https://gwas.mrcieu.ac.uk/files/met-a-418/met-a-418.vcf.gz	met-a-418
1,5-anhydroglucitol (1,5-AG)	7746	7746	2014	Shin et al.	Males and Females	European	log10 units	2545780	https://gwas.mrcieu.ac.uk/files/met-a-419/met-a-419.vcf.gz	met-a-419
2-hydroxybutyrate (AHB)	7815	7815	2014	Shin et al.	Males and Females	European	log10 units	2545615	https://gwas.mrcieu.ac.uk/files/met-a-420/met-a-420.vcf.gz	met-a-420
3-methyl-2-oxobutyrate	7648	7648	2014	Shin et al.	Males and Females	European	log10 units	2545692	https://gwas.mrcieu.ac.uk/files/met-a-421/met-a-421.vcf.gz	met-a-421
1,6-anhydroglucose	3663	3663	2014	Shin et al.	Males and Females	European	log10 units	2541750	https://gwas.mrcieu.ac.uk/files/met-a-422/met-a-422.vcf.gz	met-a-422
1-palmitoylglycerol (1-monopalmitin)	7429	7429	2014	Shin et al.	Males and Females	European	log10 units	2544839	https://gwas.mrcieu.ac.uk/files/met-a-423/met-a-423.vcf.gz	met-a-423
1-oleoylglycerol (1-monoolein)	5717	5717	2014	Shin et al.	Males and Females	European	log10 units	2545533	https://gwas.mrcieu.ac.uk/files/met-a-424/met-a-424.vcf.gz	met-a-424
1-stearoylglycerol (1-monostearin)	6965	6965	2014	Shin et al.	Males and Females	European	log10 units	2544531	https://gwas.mrcieu.ac.uk/files/met-a-425/met-a-425.vcf.gz	met-a-425
2-hydroxyisobutyrate	6539	6539	2014	Shin et al.	Males and Females	European	log10 units	2545252	https://gwas.mrcieu.ac.uk/files/met-a-427/met-a-427.vcf.gz	met-a-427
4-methyl-2-oxopentanoate	7776	7776	2014	Shin et al.	Males and Females	European	log10 units	2545690	https://gwas.mrcieu.ac.uk/files/met-a-429/met-a-429.vcf.gz	met-a-429
Phenyllactate (PLA)	6064	6064	2014	Shin et al.	Males and Females	European	log10 units	2544881	https://gwas.mrcieu.ac.uk/files/met-a-430/met-a-430.vcf.gz	met-a-430
Homocitrulline	4135	4135	2014	Shin et al.	Males and Females	European	log10 units	2545416	https://gwas.mrcieu.ac.uk/files/met-a-431/met-a-431.vcf.gz	met-a-431
Aspartylphenylalanine	3948	3948	2014	Shin et al.	Males and Females	European	log10 units	2545786	https://gwas.mrcieu.ac.uk/files/met-a-432/met-a-432.vcf.gz	met-a-432
Levulinate (4-oxovalerate)	6982	6982	2014	Shin et al.	Males and Females	European	log10 units	2544323	https://gwas.mrcieu.ac.uk/files/met-a-433/met-a-433.vcf.gz	met-a-433
Palmitoylcarnitine	7701	7701	2014	Shin et al.	Males and Females	European	log10 units	2545659	https://gwas.mrcieu.ac.uk/files/met-a-434/met-a-434.vcf.gz	met-a-434
Cholate	5929	5929	2014	Shin et al.	Males and Females	European	log10 units	2545328	https://gwas.mrcieu.ac.uk/files/met-a-438/met-a-438.vcf.gz	met-a-438
1-linoleoylglycerol (1-monolinolein)	2797	2797	2014	Shin et al.	Males and Females	European	log10 units	2545660	https://gwas.mrcieu.ac.uk/files/met-a-445/met-a-445.vcf.gz	met-a-445
Indoleacetate	7618	7618	2014	Shin et al.	Males and Females	European	log10 units	2545787	https://gwas.mrcieu.ac.uk/files/met-a-446/met-a-446.vcf.gz	met-a-446
Hyodeoxycholate	6025	6025	2014	Shin et al.	Males and Females	European	log10 units	2544532	https://gwas.mrcieu.ac.uk/files/met-a-447/met-a-447.vcf.gz	met-a-447
3-indoxyl sulfate	7787	7787	2014	Shin et al.	Males and Females	European	log10 units	2545634	https://gwas.mrcieu.ac.uk/files/met-a-448/met-a-448.vcf.gz	met-a-448
N-acetylglycine	7135	7135	2014	Shin et al.	Males and Females	European	log10 units	2545572	https://gwas.mrcieu.ac.uk/files/met-a-449/met-a-449.vcf.gz	met-a-449
Bilirubin (Z,Z)	6812	6812	2014	Shin et al.	Males and Females	European	log10 units	2545527	https://gwas.mrcieu.ac.uk/files/met-a-450/met-a-450.vcf.gz	met-a-450
Creatine	7822	7822	2014	Shin et al.	Males and Females	European	log10 units	2545661	https://gwas.mrcieu.ac.uk/files/met-a-451/met-a-451.vcf.gz	met-a-451
Erythrose	7263	7263	2014	Shin et al.	Males and Females	European	log10 units	2545059	https://gwas.mrcieu.ac.uk/files/met-a-452/met-a-452.vcf.gz	met-a-452
Threonate	7782	7782	2014	Shin et al.	Males and Females	European	log10 units	2545583	https://gwas.mrcieu.ac.uk/files/met-a-453/met-a-453.vcf.gz	met-a-453
Cysteine	7692	7692	2014	Shin et al.	Males and Females	European	log10 units	2545727	https://gwas.mrcieu.ac.uk/files/met-a-455/met-a-455.vcf.gz	met-a-455
Pyroglutamylglycine	1586	1586	2014	Shin et al.	Males and Females	European	log10 units	2545128	https://gwas.mrcieu.ac.uk/files/met-a-456/met-a-456.vcf.gz	met-a-456
N-(2-furoyl)glycine	604	604	2014	Shin et al.	Males and Females	European	log10 units	2542858	https://gwas.mrcieu.ac.uk/files/met-a-457/met-a-457.vcf.gz	met-a-457
DSGEGDFXAEGGGVR*	5371	5371	2014	Shin et al.	Males and Females	European	log10 units	2545674	https://gwas.mrcieu.ac.uk/files/met-a-458/met-a-458.vcf.gz	met-a-458
Pyridoxate	7703	7703	2014	Shin et al.	Males and Females	European	log10 units	2545397	https://gwas.mrcieu.ac.uk/files/met-a-459/met-a-459.vcf.gz	met-a-459
Androsterone sulfate	7785	7785	2014	Shin et al.	Males and Females	European	log10 units	2545586	https://gwas.mrcieu.ac.uk/files/met-a-460/met-a-460.vcf.gz	met-a-460
3-carboxy-4-methyl-5-propyl-2-furanpropanoate (CMPF)	7812	7812	2014	Shin et al.	Males and Females	European	log10 units	2545488	https://gwas.mrcieu.ac.uk/files/met-a-461/met-a-461.vcf.gz	met-a-461
3-(4-hydroxyphenyl)lactate	7795	7795	2014	Shin et al.	Males and Females	European	log10 units	2545643	https://gwas.mrcieu.ac.uk/files/met-a-462/met-a-462.vcf.gz	met-a-462
Acetylcarnitine	7805	7805	2014	Shin et al.	Males and Females	European	log10 units	2545614	https://gwas.mrcieu.ac.uk/files/met-a-463/met-a-463.vcf.gz	met-a-463
Serine	7796	7796	2014	Shin et al.	Males and Females	European	log10 units	2545555	https://gwas.mrcieu.ac.uk/files/met-a-464/met-a-464.vcf.gz	met-a-464
Trans-4-hydroxyproline	7802	7802	2014	Shin et al.	Males and Females	European	log10 units	2545622	https://gwas.mrcieu.ac.uk/files/met-a-465/met-a-465.vcf.gz	met-a-465
Glutamate	7804	7804	2014	Shin et al.	Males and Females	European	log10 units	2545537	https://gwas.mrcieu.ac.uk/files/met-a-466/met-a-466.vcf.gz	met-a-466
Hexanoylcarnitine	7786	7786	2014	Shin et al.	Males and Females	European	log10 units	2545658	https://gwas.mrcieu.ac.uk/files/met-a-467/met-a-467.vcf.gz	met-a-467
Glycine	7802	7802	2014	Shin et al.	Males and Females	European	log10 units	2545539	https://gwas.mrcieu.ac.uk/files/met-a-468/met-a-468.vcf.gz	met-a-468
Alanine	7788	7788	2014	Shin et al.	Males and Females	European	log10 units	2545552	https://gwas.mrcieu.ac.uk/files/met-a-469/met-a-469.vcf.gz	met-a-469
Glycochenodeoxycholate	7087	7087	2014	Shin et al.	Males and Females	European	log10 units	2545325	https://gwas.mrcieu.ac.uk/files/met-a-470/met-a-470.vcf.gz	met-a-470
2-aminobutyrate	7814	7814	2014	Shin et al.	Males and Females	European	log10 units	2545391	https://gwas.mrcieu.ac.uk/files/met-a-471/met-a-471.vcf.gz	met-a-471
Scyllo-inositol	6500	6500	2014	Shin et al.	Males and Females	European	log10 units	2545394	https://gwas.mrcieu.ac.uk/files/met-a-472/met-a-472.vcf.gz	met-a-472
Dodecanedioate	6478	6478	2014	Shin et al.	Males and Females	European	log10 units	2544193	https://gwas.mrcieu.ac.uk/files/met-a-473/met-a-473.vcf.gz	met-a-473
Gamma-glutamylvaline	7753	7753	2014	Shin et al.	Males and Females	European	log10 units	2545824	https://gwas.mrcieu.ac.uk/files/met-a-474/met-a-474.vcf.gz	met-a-474
Indolepropionate	7803	7803	2014	Shin et al.	Males and Females	European	log10 units	2545646	https://gwas.mrcieu.ac.uk/files/met-a-475/met-a-475.vcf.gz	met-a-475
Butyrylcarnitine	7796	7796	2014	Shin et al.	Males and Females	European	log10 units	2545688	https://gwas.mrcieu.ac.uk/files/met-a-476/met-a-476.vcf.gz	met-a-476
Myristoleate (14:1n5)	7804	7804	2014	Shin et al.	Males and Females	European	log10 units	2545638	https://gwas.mrcieu.ac.uk/files/met-a-477/met-a-477.vcf.gz	met-a-477
Dehydroisoandrosterone sulfate (DHEA-S)	7793	7793	2014	Shin et al.	Males and Females	European	log10 units	2545593	https://gwas.mrcieu.ac.uk/files/met-a-478/met-a-478.vcf.gz	met-a-478
Propionylcarnitine	7813	7813	2014	Shin et al.	Males and Females	European	log10 units	2545656	https://gwas.mrcieu.ac.uk/files/met-a-479/met-a-479.vcf.gz	met-a-479
Caproate (6:0)	7811	7811	2014	Shin et al.	Males and Females	European	log10 units	2545676	https://gwas.mrcieu.ac.uk/files/met-a-480/met-a-480.vcf.gz	met-a-480
Caprylate (8:0)	7802	7802	2014	Shin et al.	Males and Females	European	log10 units	2545676	https://gwas.mrcieu.ac.uk/files/met-a-481/met-a-481.vcf.gz	met-a-481
10-undecenoate (11:1n1)	7806	7806	2014	Shin et al.	Males and Females	European	log10 units	2545687	https://gwas.mrcieu.ac.uk/files/met-a-482/met-a-482.vcf.gz	met-a-482
Docosapentaenoate (n3 DPA; 22:5n3)	7821	7821	2014	Shin et al.	Males and Females	European	log10 units	2545661	https://gwas.mrcieu.ac.uk/files/met-a-483/met-a-483.vcf.gz	met-a-483
Phenol sulfate	7810	7810	2014	Shin et al.	Males and Females	European	log10 units	2545665	https://gwas.mrcieu.ac.uk/files/met-a-486/met-a-486.vcf.gz	met-a-486
Bilirubin (E,E)*	7748	7748	2014	Shin et al.	Males and Females	European	log10 units	2545661	https://gwas.mrcieu.ac.uk/files/met-a-491/met-a-491.vcf.gz	met-a-491
Heme*	6380	6380	2014	Shin et al.	Males and Females	European	log10 units	2545666	https://gwas.mrcieu.ac.uk/files/met-a-493/met-a-493.vcf.gz	met-a-493
1-linoleoylglycerophosphoethanolamine*	7817	7817	2014	Shin et al.	Males and Females	European	log10 units	2545675	https://gwas.mrcieu.ac.uk/files/met-a-497/met-a-497.vcf.gz	met-a-497
3-dehydrocarnitine*	7809	7809	2014	Shin et al.	Males and Females	European	log10 units	2545672	https://gwas.mrcieu.ac.uk/files/met-a-500/met-a-500.vcf.gz	met-a-500
Pyroglutamine*	7800	7800	2014	Shin et al.	Males and Females	European	log10 units	2545655	https://gwas.mrcieu.ac.uk/files/met-a-501/met-a-501.vcf.gz	met-a-501
C-glycosyltryptophan*	7786	7786	2014	Shin et al.	Males and Females	European	log10 units	2545614	https://gwas.mrcieu.ac.uk/files/met-a-502/met-a-502.vcf.gz	met-a-502
X-03056--N-[3-(2-Oxopyrrolidin-1-yl)propyl]acetamide	7812	7812	2014	Shin et al.	Males and Females	European	log10 units	2545675	https://gwas.mrcieu.ac.uk/files/met-a-505/met-a-505.vcf.gz	met-a-505
X-11422--xanthine	6346	6346	2014	Shin et al.	Males and Females	European	log10 units	2545847	https://gwas.mrcieu.ac.uk/files/met-a-508/met-a-508.vcf.gz	met-a-508
X-11423--O-sulfo-L-tyrosine	7765	7765	2014	Shin et al.	Males and Females	European	log10 units	2545473	https://gwas.mrcieu.ac.uk/files/met-a-509/met-a-509.vcf.gz	met-a-509
X-11445--5-alpha-pregnan-3beta,20alpha-disulfate	2570	2570	2014	Shin et al.	Males and Females	European	log10 units	2545722	https://gwas.mrcieu.ac.uk/files/met-a-517/met-a-517.vcf.gz	met-a-517
HWESASXX*	7700	7700	2014	Shin et al.	Males and Females	European	log10 units	2545502	https://gwas.mrcieu.ac.uk/files/met-a-526/met-a-526.vcf.gz	met-a-526
X-11593--O-methylascorbate*	7788	7788	2014	Shin et al.	Males and Females	European	log10 units	2545561	https://gwas.mrcieu.ac.uk/files/met-a-536/met-a-536.vcf.gz	met-a-536
Adrenate (22:4n6)	7778	7778	2014	Shin et al.	Males and Females	European	log10 units	2545645	https://gwas.mrcieu.ac.uk/files/met-a-537/met-a-537.vcf.gz	met-a-537
Homostachydrine*	3003	3003	2014	Shin et al.	Males and Females	European	log10 units	2545071	https://gwas.mrcieu.ac.uk/files/met-a-538/met-a-538.vcf.gz	met-a-538
ADSGEGDFXAEGGGVR*	5588	5588	2014	Shin et al.	Males and Females	European	log10 units	2545664	https://gwas.mrcieu.ac.uk/files/met-a-539/met-a-539.vcf.gz	met-a-539
X-11786--methylcysteine	2811	2811	2014	Shin et al.	Males and Females	European	log10 units	2545672	https://gwas.mrcieu.ac.uk/files/met-a-540/met-a-540.vcf.gz	met-a-540
X-11793--oxidized bilirubin*	7611	7611	2014	Shin et al.	Males and Females	European	log10 units	2545819	https://gwas.mrcieu.ac.uk/files/met-a-543/met-a-543.vcf.gz	met-a-543
1-arachidonoylglycerophosphocholine*	7507	7507	2014	Shin et al.	Males and Females	European	log10 units	2545400	https://gwas.mrcieu.ac.uk/files/met-a-558/met-a-558.vcf.gz	met-a-558
1-palmitoleoylglycerophosphocholine*	7812	7812	2014	Shin et al.	Males and Females	European	log10 units	2545682	https://gwas.mrcieu.ac.uk/files/met-a-559/met-a-559.vcf.gz	met-a-559
Gamma-glutamylmethionine*	2240	2240	2014	Shin et al.	Males and Females	European	log10 units	2545674	https://gwas.mrcieu.ac.uk/files/met-a-563/met-a-563.vcf.gz	met-a-563
Gamma-glutamylthreonine*	4016	4016	2014	Shin et al.	Males and Females	European	log10 units	2545368	https://gwas.mrcieu.ac.uk/files/met-a-564/met-a-564.vcf.gz	met-a-564
Gamma-tocopherol	6226	6226	2014	Shin et al.	Males and Females	European	log10 units	2544979	https://gwas.mrcieu.ac.uk/files/met-a-571/met-a-571.vcf.gz	met-a-571
Gamma-glutamylphenylalanine	7753	7753	2014	Shin et al.	Males and Females	European	log10 units	2545841	https://gwas.mrcieu.ac.uk/files/met-a-572/met-a-572.vcf.gz	met-a-572
Isobutyrylcarnitine	7812	7812	2014	Shin et al.	Males and Females	European	log10 units	2545669	https://gwas.mrcieu.ac.uk/files/met-a-573/met-a-573.vcf.gz	met-a-573
Pseudouridine	7785	7785	2014	Shin et al.	Males and Females	European	log10 units	2545533	https://gwas.mrcieu.ac.uk/files/met-a-574/met-a-574.vcf.gz	met-a-574
Valerate	4102	4102	2014	Shin et al.	Males and Females	European	log10 units	2545199	https://gwas.mrcieu.ac.uk/files/met-a-575/met-a-575.vcf.gz	met-a-575
Palmitoleate (16:1n7)	7776	7776	2014	Shin et al.	Males and Females	European	log10 units	2545657	https://gwas.mrcieu.ac.uk/files/met-a-576/met-a-576.vcf.gz	met-a-576
Alpha-ketoglutarate	6130	6130	2014	Shin et al.	Males and Females	European	log10 units	2544385	https://gwas.mrcieu.ac.uk/files/met-a-577/met-a-577.vcf.gz	met-a-577
Erythronate*	7752	7752	2014	Shin et al.	Males and Females	European	log10 units	2545588	https://gwas.mrcieu.ac.uk/files/met-a-578/met-a-578.vcf.gz	met-a-578
Lathosterol	5457	5457	2014	Shin et al.	Males and Females	European	log10 units	2544172	https://gwas.mrcieu.ac.uk/files/met-a-579/met-a-579.vcf.gz	met-a-579
X-12095--N1-methyl-3-pyridone-4-carboxamide	7711	7711	2014	Shin et al.	Males and Females	European	log10 units	2545785	https://gwas.mrcieu.ac.uk/files/met-a-583/met-a-583.vcf.gz	met-a-583
X-12100--hydroxytryptophan*	7499	7499	2014	Shin et al.	Males and Females	European	log10 units	2545929	https://gwas.mrcieu.ac.uk/files/met-a-584/met-a-584.vcf.gz	met-a-584
Eicosenoate (20:1n9 or 11)	7799	7799	2014	Shin et al.	Males and Females	European	log10 units	2545661	https://gwas.mrcieu.ac.uk/files/met-a-586/met-a-586.vcf.gz	met-a-586
X-12244--N-acetylcarnosine	6608	6608	2014	Shin et al.	Males and Females	European	log10 units	2545599	https://gwas.mrcieu.ac.uk/files/met-a-596/met-a-596.vcf.gz	met-a-596
ADpSGEGDFXAEGGGVR*	3939	3939	2014	Shin et al.	Males and Females	European	log10 units	2545660	https://gwas.mrcieu.ac.uk/files/met-a-601/met-a-601.vcf.gz	met-a-601
1-eicosatrienoylglycerophosphocholine*	7809	7809	2014	Shin et al.	Males and Females	European	log10 units	2545640	https://gwas.mrcieu.ac.uk/files/met-a-602/met-a-602.vcf.gz	met-a-602
1-docosahexaenoylglycerophosphocholine*	7798	7798	2014	Shin et al.	Males and Females	European	log10 units	2545492	https://gwas.mrcieu.ac.uk/files/met-a-603/met-a-603.vcf.gz	met-a-603
1-eicosadienoylglycerophosphocholine*	6892	6892	2014	Shin et al.	Males and Females	European	log10 units	2545861	https://gwas.mrcieu.ac.uk/files/met-a-607/met-a-607.vcf.gz	met-a-607
X-12441--12-hydroxyeicosatetraenoate (12-HETE)	2761	2761	2014	Shin et al.	Males and Females	European	log10 units	2545695	https://gwas.mrcieu.ac.uk/files/met-a-609/met-a-609.vcf.gz	met-a-609
X-12442--5,8-tetradecadienoate	7780	7780	2014	Shin et al.	Males and Females	European	log10 units	2545631	https://gwas.mrcieu.ac.uk/files/met-a-610/met-a-610.vcf.gz	met-a-610
Octanoylcarnitine	7790	7790	2014	Shin et al.	Males and Females	European	log10 units	2545666	https://gwas.mrcieu.ac.uk/files/met-a-615/met-a-615.vcf.gz	met-a-615
Alpha-hydroxyisovalerate	7668	7668	2014	Shin et al.	Males and Females	European	log10 units	2545440	https://gwas.mrcieu.ac.uk/files/met-a-616/met-a-616.vcf.gz	met-a-616
N-acetylthreonine	6909	6909	2014	Shin et al.	Males and Females	European	log10 units	2545129	https://gwas.mrcieu.ac.uk/files/met-a-617/met-a-617.vcf.gz	met-a-617
Decanoylcarnitine	7766	7766	2014	Shin et al.	Males and Females	European	log10 units	2545676	https://gwas.mrcieu.ac.uk/files/met-a-618/met-a-618.vcf.gz	met-a-618
1-palmitoylglycerophosphocholine	7803	7803	2014	Shin et al.	Males and Females	European	log10 units	2545684	https://gwas.mrcieu.ac.uk/files/met-a-619/met-a-619.vcf.gz	met-a-619
1-heptadecanoylglycerophosphocholine	7422	7422	2014	Shin et al.	Males and Females	European	log10 units	2545876	https://gwas.mrcieu.ac.uk/files/met-a-620/met-a-620.vcf.gz	met-a-620
1-oleoylglycerophosphocholine	7812	7812	2014	Shin et al.	Males and Females	European	log10 units	2545676	https://gwas.mrcieu.ac.uk/files/met-a-621/met-a-621.vcf.gz	met-a-621
1-stearoylglycerophosphocholine	7817	7817	2014	Shin et al.	Males and Females	European	log10 units	2545648	https://gwas.mrcieu.ac.uk/files/met-a-622/met-a-622.vcf.gz	met-a-622
5-dodecenoate (12:1n7)	7770	7770	2014	Shin et al.	Males and Females	European	log10 units	2545535	https://gwas.mrcieu.ac.uk/files/met-a-623/met-a-623.vcf.gz	met-a-623
Stearidonate (18:4n3)	7775	7775	2014	Shin et al.	Males and Females	European	log10 units	2545635	https://gwas.mrcieu.ac.uk/files/met-a-624/met-a-624.vcf.gz	met-a-624
10-heptadecenoate (17:1n7)	7795	7795	2014	Shin et al.	Males and Females	European	log10 units	2545657	https://gwas.mrcieu.ac.uk/files/met-a-625/met-a-625.vcf.gz	met-a-625
10-nonadecenoate (19:1n9)	7789	7789	2014	Shin et al.	Males and Females	European	log10 units	2545680	https://gwas.mrcieu.ac.uk/files/met-a-626/met-a-626.vcf.gz	met-a-626
Epiandrosterone sulfate	7769	7769	2014	Shin et al.	Males and Females	European	log10 units	2545674	https://gwas.mrcieu.ac.uk/files/met-a-627/met-a-627.vcf.gz	met-a-627
Linolenate [alpha or gamma; (18:3n3 or 6)]	7786	7786	2014	Shin et al.	Males and Females	European	log10 units	2545661	https://gwas.mrcieu.ac.uk/files/met-a-628/met-a-628.vcf.gz	met-a-628
X-12510--2-aminooctanoic acid	7566	7566	2014	Shin et al.	Males and Females	European	log10 units	2545484	https://gwas.mrcieu.ac.uk/files/met-a-629/met-a-629.vcf.gz	met-a-629
Bilirubin (E,Z or Z,E)*	5295	5295	2014	Shin et al.	Males and Females	European	log10 units	2545706	https://gwas.mrcieu.ac.uk/files/met-a-631/met-a-631.vcf.gz	met-a-631
1-arachidonoylglycerophosphoinositol*	7797	7797	2014	Shin et al.	Males and Females	European	log10 units	2545547	https://gwas.mrcieu.ac.uk/files/met-a-634/met-a-634.vcf.gz	met-a-634
Asparagine	7761	7761	2014	Shin et al.	Males and Females	European	log10 units	2545507	https://gwas.mrcieu.ac.uk/files/met-a-638/met-a-638.vcf.gz	met-a-638
Stachydrine	6745	6745	2014	Shin et al.	Males and Females	European	log10 units	2545667	https://gwas.mrcieu.ac.uk/files/met-a-651/met-a-651.vcf.gz	met-a-651
Isovalerylcarnitine	7789	7789	2014	Shin et al.	Males and Females	European	log10 units	2545606	https://gwas.mrcieu.ac.uk/files/met-a-652/met-a-652.vcf.gz	met-a-652
Stearoylcarnitine	7183	7183	2014	Shin et al.	Males and Females	European	log10 units	2546184	https://gwas.mrcieu.ac.uk/files/met-a-653/met-a-653.vcf.gz	met-a-653
1-stearoylglycerophosphoethanolamine	7369	7369	2014	Shin et al.	Males and Females	European	log10 units	2545759	https://gwas.mrcieu.ac.uk/files/met-a-654/met-a-654.vcf.gz	met-a-654
1-linoleoylglycerophosphocholine	7795	7795	2014	Shin et al.	Males and Females	European	log10 units	2545647	https://gwas.mrcieu.ac.uk/files/met-a-655/met-a-655.vcf.gz	met-a-655
Bradykinin, des-arg(9)	4570	4570	2014	Shin et al.	Males and Females	European	log10 units	2545567	https://gwas.mrcieu.ac.uk/files/met-a-656/met-a-656.vcf.gz	met-a-656
Gamma-glutamylisoleucine*	5522	5522	2014	Shin et al.	Males and Females	European	log10 units	2544669	https://gwas.mrcieu.ac.uk/files/met-a-659/met-a-659.vcf.gz	met-a-659
Laurylcarnitine	5170	5170	2014	Shin et al.	Males and Females	European	log10 units	2545632	https://gwas.mrcieu.ac.uk/files/met-a-668/met-a-668.vcf.gz	met-a-668
X-12990--docosapentaenoic acid (n6-DPA)	2581	2581	2014	Shin et al.	Males and Females	European	log10 units	2545878	https://gwas.mrcieu.ac.uk/files/met-a-671/met-a-671.vcf.gz	met-a-671
Isovalerate	7080	7080	2014	Shin et al.	Males and Females	European	log10 units	2545504	https://gwas.mrcieu.ac.uk/files/met-a-672/met-a-672.vcf.gz	met-a-672
X-13183--stearamide	2503	2503	2014	Shin et al.	Males and Females	European	log10 units	2545619	https://gwas.mrcieu.ac.uk/files/met-a-674/met-a-674.vcf.gz	met-a-674
7-methylguanine	6091	6091	2014	Shin et al.	Males and Females	European	log10 units	2545616	https://gwas.mrcieu.ac.uk/files/met-a-676/met-a-676.vcf.gz	met-a-676
Phenylacetylglutamine	7812	7812	2014	Shin et al.	Males and Females	European	log10 units	2545653	https://gwas.mrcieu.ac.uk/files/met-a-677/met-a-677.vcf.gz	met-a-677
Pro-hydroxy-pro	7787	7787	2014	Shin et al.	Males and Females	European	log10 units	2545647	https://gwas.mrcieu.ac.uk/files/met-a-678/met-a-678.vcf.gz	met-a-678
N2,N2-dimethylguanosine	5228	5228	2014	Shin et al.	Males and Females	European	log10 units	2543696	https://gwas.mrcieu.ac.uk/files/met-a-679/met-a-679.vcf.gz	met-a-679
Cysteine-glutathione disulfide	1997	1997	2014	Shin et al.	Males and Females	European	log10 units	2545457	https://gwas.mrcieu.ac.uk/files/met-a-680/met-a-680.vcf.gz	met-a-680
Oleoylcarnitine	7708	7708	2014	Shin et al.	Males and Females	European	log10 units	2545666	https://gwas.mrcieu.ac.uk/files/met-a-681/met-a-681.vcf.gz	met-a-681
1-arachidonoylglycerophosphoethanolamine*	7798	7798	2014	Shin et al.	Males and Females	European	log10 units	2545686	https://gwas.mrcieu.ac.uk/files/met-a-682/met-a-682.vcf.gz	met-a-682
X-13431--nonanoylcarnitine*	6591	6591	2014	Shin et al.	Males and Females	European	log10 units	2545684	https://gwas.mrcieu.ac.uk/files/met-a-684/met-a-684.vcf.gz	met-a-684
2-palmitoylglycerophosphocholine*	7695	7695	2014	Shin et al.	Males and Females	European	log10 units	2545626	https://gwas.mrcieu.ac.uk/files/met-a-687/met-a-687.vcf.gz	met-a-687
2-oleoylglycerophosphocholine*	7524	7524	2014	Shin et al.	Males and Females	European	log10 units	2545642	https://gwas.mrcieu.ac.uk/files/met-a-688/met-a-688.vcf.gz	met-a-688
2-stearoylglycerophosphocholine*	7730	7730	2014	Shin et al.	Males and Females	European	log10 units	2545681	https://gwas.mrcieu.ac.uk/files/met-a-689/met-a-689.vcf.gz	met-a-689
2-linoleoylglycerophosphocholine*	6894	6894	2014	Shin et al.	Males and Females	European	log10 units	2545443	https://gwas.mrcieu.ac.uk/files/met-a-690/met-a-690.vcf.gz	met-a-690
1-palmitoylglycerophosphoinositol*	6282	6282	2014	Shin et al.	Males and Females	European	log10 units	2545375	https://gwas.mrcieu.ac.uk/files/met-a-692/met-a-692.vcf.gz	met-a-692
2-methylbutyroylcarnitine	7420	7420	2014	Shin et al.	Males and Females	European	log10 units	2545908	https://gwas.mrcieu.ac.uk/files/met-a-697/met-a-697.vcf.gz	met-a-697
Hydroxyisovaleroyl carnitine	5588	5588	2014	Shin et al.	Males and Females	European	log10 units	2545672	https://gwas.mrcieu.ac.uk/files/met-a-698/met-a-698.vcf.gz	met-a-698
Glutaroyl carnitine	7701	7701	2014	Shin et al.	Males and Females	European	log10 units	2545220	https://gwas.mrcieu.ac.uk/files/met-a-699/met-a-699.vcf.gz	met-a-699
2-tetradecenoyl carnitine	6998	6998	2014	Shin et al.	Males and Females	European	log10 units	2545978	https://gwas.mrcieu.ac.uk/files/met-a-702/met-a-702.vcf.gz	met-a-702
4-hydroxyhippurate	4368	4368	2014	Shin et al.	Males and Females	European	log10 units	2543571	https://gwas.mrcieu.ac.uk/files/met-a-703/met-a-703.vcf.gz	met-a-703
1-myristoylglycerophosphocholine	7812	7812	2014	Shin et al.	Males and Females	European	log10 units	2545688	https://gwas.mrcieu.ac.uk/files/met-a-705/met-a-705.vcf.gz	met-a-705
1-oleoylglycerophosphoethanolamine	7749	7749	2014	Shin et al.	Males and Females	European	log10 units	2545691	https://gwas.mrcieu.ac.uk/files/met-a-706/met-a-706.vcf.gz	met-a-706
1-palmitoylglycerophosphoethanolamine	7763	7763	2014	Shin et al.	Males and Females	European	log10 units	2545788	https://gwas.mrcieu.ac.uk/files/met-a-707/met-a-707.vcf.gz	met-a-707
3-(3-hydroxyphenyl)propionate	1163	1163	2014	Shin et al.	Males and Females	European	log10 units	2541405	https://gwas.mrcieu.ac.uk/files/met-a-708/met-a-708.vcf.gz	met-a-708
Tetradecanedioate	6046	6046	2014	Shin et al.	Males and Females	European	log10 units	2543511	https://gwas.mrcieu.ac.uk/files/met-a-709/met-a-709.vcf.gz	met-a-709
2-hydroxypalmitate	7797	7797	2014	Shin et al.	Males and Females	European	log10 units	2545650	https://gwas.mrcieu.ac.uk/files/met-a-710/met-a-710.vcf.gz	met-a-710
Hexadecanedioate	6887	6887	2014	Shin et al.	Males and Females	European	log10 units	2545172	https://gwas.mrcieu.ac.uk/files/met-a-711/met-a-711.vcf.gz	met-a-711
Dihomo-linolenate (20:3n3 or n6)	7805	7805	2014	Shin et al.	Males and Females	European	log10 units	2545634	https://gwas.mrcieu.ac.uk/files/met-a-712/met-a-712.vcf.gz	met-a-712
Threitol	7381	7381	2014	Shin et al.	Males and Females	European	log10 units	2545964	https://gwas.mrcieu.ac.uk/files/met-a-714/met-a-714.vcf.gz	met-a-714
P-cresol sulfate	7758	7758	2014	Shin et al.	Males and Females	European	log10 units	2545765	https://gwas.mrcieu.ac.uk/files/met-a-718/met-a-718.vcf.gz	met-a-718
X-14189--leucylalanine	2745	2745	2014	Shin et al.	Males and Females	European	log10 units	2545768	https://gwas.mrcieu.ac.uk/files/met-a-719/met-a-719.vcf.gz	met-a-719
X-14205--alpha-glutamyltyrosine	1789	1789	2014	Shin et al.	Males and Females	European	log10 units	2545647	https://gwas.mrcieu.ac.uk/files/met-a-720/met-a-720.vcf.gz	met-a-720
X-14208--phenylalanylserine	2455	2455	2014	Shin et al.	Males and Females	European	log10 units	2545429	https://gwas.mrcieu.ac.uk/files/met-a-721/met-a-721.vcf.gz	met-a-721
X-14304--leucylalanine	2434	2434	2014	Shin et al.	Males and Females	European	log10 units	2546105	https://gwas.mrcieu.ac.uk/files/met-a-722/met-a-722.vcf.gz	met-a-722
X-14450--phenylalanylleucine	2555	2555	2014	Shin et al.	Males and Females	European	log10 units	2545121	https://gwas.mrcieu.ac.uk/files/met-a-724/met-a-724.vcf.gz	met-a-724
Gamma-glutamylglutamate	931	931	2014	Shin et al.	Males and Females	European	log10 units	2545200	https://gwas.mrcieu.ac.uk/files/met-a-734/met-a-734.vcf.gz	met-a-734
Octadecanedioate	7300	7300	2014	Shin et al.	Males and Females	European	log10 units	2545925	https://gwas.mrcieu.ac.uk/files/met-a-735/met-a-735.vcf.gz	met-a-735
Leucylleucine	3386	3386	2014	Shin et al.	Males and Females	European	log10 units	2545218	https://gwas.mrcieu.ac.uk/files/met-a-736/met-a-736.vcf.gz	met-a-736
7-alpha-hydroxy-3-oxo-4-cholestenoate (7-Hoca)	7784	7784	2014	Shin et al.	Males and Females	European	log10 units	2545638	https://gwas.mrcieu.ac.uk/files/met-a-737/met-a-737.vcf.gz	met-a-737
N-Butyl Oleate	4542	4542	2014	Shin et al.	Males and Females	European	log10 units	2545187	https://gwas.mrcieu.ac.uk/files/met-a-738/met-a-738.vcf.gz	met-a-738
Dimethylarginine (SDMA + ADMA)	7347	7347	2014	Shin et al.	Males and Females	European	log10 units	2545585	https://gwas.mrcieu.ac.uk/files/met-a-739/met-a-739.vcf.gz	met-a-739
Taurolithocholate 3-sulfate	6904	6904	2014	Shin et al.	Males and Females	European	log10 units	2545827	https://gwas.mrcieu.ac.uk/files/met-a-740/met-a-740.vcf.gz	met-a-740
X-14977--vanillin	1789	1789	2014	Shin et al.	Males and Females	European	log10 units	2545167	https://gwas.mrcieu.ac.uk/files/met-a-741/met-a-741.vcf.gz	met-a-741
Succinylcarnitine	6948	6948	2014	Shin et al.	Males and Females	European	log10 units	2545250	https://gwas.mrcieu.ac.uk/files/met-a-742/met-a-742.vcf.gz	met-a-742
Tryptophan betaine	7439	7439	2014	Shin et al.	Males and Females	European	log10 units	2545376	https://gwas.mrcieu.ac.uk/files/met-a-743/met-a-743.vcf.gz	met-a-743
Cyclo(leu-pro)	4833	4833	2014	Shin et al.	Males and Females	European	log10 units	2544386	https://gwas.mrcieu.ac.uk/files/met-a-744/met-a-744.vcf.gz	met-a-744
Chiro-inositol	2729	2729	2014	Shin et al.	Males and Females	European	log10 units	2542686	https://gwas.mrcieu.ac.uk/files/met-a-745/met-a-745.vcf.gz	met-a-745
5alpha-androstan-3beta,17beta-diol disulfate	7345	7345	2014	Shin et al.	Males and Females	European	log10 units	2545804	https://gwas.mrcieu.ac.uk/files/met-a-746/met-a-746.vcf.gz	met-a-746
4-androsten-3beta,17beta-diol disulfate 1*	7804	7804	2014	Shin et al.	Males and Females	European	log10 units	2545651	https://gwas.mrcieu.ac.uk/files/met-a-747/met-a-747.vcf.gz	met-a-747
4-androsten-3beta,17beta-diol disulfate 2*	7776	7776	2014	Shin et al.	Males and Females	European	log10 units	2545567	https://gwas.mrcieu.ac.uk/files/met-a-748/met-a-748.vcf.gz	met-a-748
2-hydroxyglutarate	6287	6287	2014	Shin et al.	Males and Females	European	log10 units	2545481	https://gwas.mrcieu.ac.uk/files/met-a-749/met-a-749.vcf.gz	met-a-749
Ergothioneine	4453	4453	2014	Shin et al.	Males and Females	European	log10 units	2545729	https://gwas.mrcieu.ac.uk/files/met-a-750/met-a-750.vcf.gz	met-a-750
Palmitoyl sphingomyelin	7814	7814	2014	Shin et al.	Males and Females	European	log10 units	2545552	https://gwas.mrcieu.ac.uk/files/met-a-751/met-a-751.vcf.gz	met-a-751
Phenylalanylphenylalanine	4961	4961	2014	Shin et al.	Males and Females	European	log10 units	2545652	https://gwas.mrcieu.ac.uk/files/met-a-752/met-a-752.vcf.gz	met-a-752
Cis-4-decenoyl carnitine	7660	7660	2014	Shin et al.	Males and Females	European	log10 units	2545651	https://gwas.mrcieu.ac.uk/files/met-a-753/met-a-753.vcf.gz	met-a-753
15-methylpalmitate (isobar with 2-methylpalmitate)	7371	7371	2014	Shin et al.	Males and Females	European	log10 units	2545546	https://gwas.mrcieu.ac.uk/files/met-a-754/met-a-754.vcf.gz	met-a-754
GMPW: homolactic fermentation	7738	7738	2022	Lopera-Maya et al.	Males and Females	European	log10 units	5563857	https://gwas.mrcieu.ac.uk/	ebi-a-GCST90027446
GMPW: glycolysis III (from glucose)	7738	7738	2022	Lopera-Maya et al.	Males and Females	European	log10 units	5564153	https://gwas.mrcieu.ac.uk/	ebi-a-GCST90027447
GMPW: superpathway of L-arginine, putrescine, and 4-aminobutanoate degradation	7738	7738	2022	Lopera-Maya et al.	Males and Females	European	log10 units	5565736	https://gwas.mrcieu.ac.uk/	ebi-a-GCST90027448
GMPW: arginine, ornithine and proline interconversion	7738	7738	2022	Lopera-Maya et al.	Males and Females	European	log10 units	5565443	https://gwas.mrcieu.ac.uk/	ebi-a-GCST90027449
GMPW: chorismate biosynthesis I	7738	7738	2022	Lopera-Maya et al.	Males and Females	European	log10 units	5564153	https://gwas.mrcieu.ac.uk/	ebi-a-GCST90027450
GMPW: superpathway of L-aspartate and L-asparagine biosynthesis	7738	7738	2022	Lopera-Maya et al.	Males and Females	European	log10 units	5564153	https://gwas.mrcieu.ac.uk/	ebi-a-GCST90027451
GMPW: L-arginine degradation II (AST pathway)	7738	7738	2022	Lopera-Maya et al.	Males and Females	European	log10 units	5564253	https://gwas.mrcieu.ac.uk/	ebi-a-GCST90027452
GMPW: superpathway of branched amino acid biosynthesis	7738	7738	2022	Lopera-Maya et al.	Males and Females	European	log10 units	5564153	https://gwas.mrcieu.ac.uk/	ebi-a-GCST90027453
GMPW: coenzyme A biosynthesis I	7738	7738	2022	Lopera-Maya et al.	Males and Females	European	log10 units	4780140	https://gwas.mrcieu.ac.uk/	ebi-a-GCST90027454
GMPW: adenosylcobalamin salvage from cobinamide I	7738	7738	2022	Lopera-Maya et al.	Males and Females	European	log10 units	5564081	https://gwas.mrcieu.ac.uk/	ebi-a-GCST90027455
GMPW: colanic acid building blocks biosynthesis	7738	7738	2022	Lopera-Maya et al.	Males and Females	European	log10 units	4161771	https://gwas.mrcieu.ac.uk/	ebi-a-GCST90027456
GMPW: superpathway of aromatic amino acid biosynthesis	7738	7738	2022	Lopera-Maya et al.	Males and Females	European	log10 units	5564153	https://gwas.mrcieu.ac.uk/	ebi-a-GCST90027457
GMPW: creatinine degradation I	7738	7738	2022	Lopera-Maya et al.	Males and Females	European	log10 units	5565043	https://gwas.mrcieu.ac.uk/	ebi-a-GCST90027458
GMPW: L-lysine biosynthesis I	7738	7738	2022	Lopera-Maya et al.	Males and Females	European	log10 units	5564035	https://gwas.mrcieu.ac.uk/	ebi-a-GCST90027459
GMPW: superpathway of purine nucleotides de novo biosynthesis II	7738	7738	2022	Lopera-Maya et al.	Males and Females	European	log10 units	5564153	https://gwas.mrcieu.ac.uk/	ebi-a-GCST90027460
GMPW: dTDP-L-rhamnose biosynthesis I	7738	7738	2022	Lopera-Maya et al.	Males and Females	European	log10 units	5564153	https://gwas.mrcieu.ac.uk/	ebi-a-GCST90027461
GMPW: enterobacterial common antigen biosynthesis	7738	7738	2022	Lopera-Maya et al.	Males and Females	European	log10 units	5564934	https://gwas.mrcieu.ac.uk/	ebi-a-GCST90027462
GMPW: enterobactin biosynthesis	7738	7738	2022	Lopera-Maya et al.	Males and Females	European	log10 units	5565687	https://gwas.mrcieu.ac.uk/	ebi-a-GCST90027463
GMPW: fatty acid &beta;-oxidation I	7738	7738	2022	Lopera-Maya et al.	Males and Females	European	log10 units	5563852	https://gwas.mrcieu.ac.uk/	ebi-a-GCST90027464
GMPW: mixed acid fermentation	7738	7738	2022	Lopera-Maya et al.	Males and Females	European	log10 units	5564477	https://gwas.mrcieu.ac.uk/	ebi-a-GCST90027465
GMPW: superpathway of fucose and rhamnose degradation	7738	7738	2022	Lopera-Maya et al.	Males and Females	European	log10 units	5291165	https://gwas.mrcieu.ac.uk/	ebi-a-GCST90027466
GMPW: fucose degradation	7738	7738	2022	Lopera-Maya et al.	Males and Females	European	log10 units	5209921	https://gwas.mrcieu.ac.uk/	ebi-a-GCST90027467
GMPW: superpathway of hexuronide and hexuronate degradation	7738	7738	2022	Lopera-Maya et al.	Males and Females	European	log10 units	5383369	https://gwas.mrcieu.ac.uk/	ebi-a-GCST90027468
GMPW: D-galactarate degradation I	7738	7738	2022	Lopera-Maya et al.	Males and Females	European	log10 units	5555488	https://gwas.mrcieu.ac.uk/	ebi-a-GCST90027469
GMPW: D-galacturonate degradation I	7738	7738	2022	Lopera-Maya et al.	Males and Females	European	log10 units	4808846	https://gwas.mrcieu.ac.uk/	ebi-a-GCST90027470
GMPW: superpathway of N-acetylglucosamine, N-acetylmannosamine and N-acetylneuraminate degradation	7738	7738	2022	Lopera-Maya et al.	Males and Females	European	log10 units	5564153	https://gwas.mrcieu.ac.uk/	ebi-a-GCST90027471
GMPW: D-glucarate degradation I	7738	7738	2022	Lopera-Maya et al.	Males and Females	European	log10 units	3118916	https://gwas.mrcieu.ac.uk/	ebi-a-GCST90027472
GMPW: gluconeogenesis I	7738	7738	2022	Lopera-Maya et al.	Males and Females	European	log10 units	5241376	https://gwas.mrcieu.ac.uk/	ebi-a-GCST90027473
GMPW: glucose and glucose-1-phosphate degradation	7738	7738	2022	Lopera-Maya et al.	Males and Females	European	log10 units	4155812	https://gwas.mrcieu.ac.uk/	ebi-a-GCST90027474
GMPW: glycogen degradation I (bacterial)	7738	7738	2022	Lopera-Maya et al.	Males and Females	European	log10 units	3399643	https://gwas.mrcieu.ac.uk/	ebi-a-GCST90027475
GMPW: glycogen biosynthesis I (from ADP-D-Glucose)	7738	7738	2022	Lopera-Maya et al.	Males and Females	European	log10 units	5564213	https://gwas.mrcieu.ac.uk/	ebi-a-GCST90027476
GMPW: superpathway of glycol metabolism and degradation	7738	7738	2022	Lopera-Maya et al.	Males and Females	European	log10 units	5565551	https://gwas.mrcieu.ac.uk/	ebi-a-GCST90027477
GMPW: superpathway of glycerol degradation to 1,3-propanediol	7738	7738	2022	Lopera-Maya et al.	Males and Females	European	log10 units	5563081	https://gwas.mrcieu.ac.uk/	ebi-a-GCST90027478
GMPW: heme biosynthesis II (anaerobic)	7738	7738	2022	Lopera-Maya et al.	Males and Females	European	log10 units	5564165	https://gwas.mrcieu.ac.uk/	ebi-a-GCST90027479
GMPW: superpathway of hexitol degradation (bacteria)	7738	7738	2022	Lopera-Maya et al.	Males and Females	European	log10 units	5563984	https://gwas.mrcieu.ac.uk/	ebi-a-GCST90027480
GMPW: L-histidine degradation I	7738	7738	2022	Lopera-Maya et al.	Males and Females	European	log10 units	5564115	https://gwas.mrcieu.ac.uk/	ebi-a-GCST90027481
GMPW: L-histidine biosynthesis	7738	7738	2022	Lopera-Maya et al.	Males and Females	European	log10 units	5564153	https://gwas.mrcieu.ac.uk/	ebi-a-GCST90027482
GMPW: L-methionine biosynthesis I	7738	7738	2022	Lopera-Maya et al.	Males and Females	European	log10 units	5564148	https://gwas.mrcieu.ac.uk/	ebi-a-GCST90027483
GMPW: L-methionine biosynthesis III	7738	7738	2022	Lopera-Maya et al.	Males and Females	European	log10 units	5564179	https://gwas.mrcieu.ac.uk/	ebi-a-GCST90027484
GMPW: L-isoleucine biosynthesis I (from threonine)	7738	7738	2022	Lopera-Maya et al.	Males and Females	European	log10 units	5564153	https://gwas.mrcieu.ac.uk/	ebi-a-GCST90027485
GMPW: superpathway of (Kdo)2-lipid A biosynthesis	7738	7738	2022	Lopera-Maya et al.	Males and Females	European	log10 units	5566712	https://gwas.mrcieu.ac.uk/	ebi-a-GCST90027486
GMPW: ketogluconate metabolism	7738	7738	2022	Lopera-Maya et al.	Males and Females	European	log10 units	5564433	https://gwas.mrcieu.ac.uk/	ebi-a-GCST90027487
GMPW: lactose and galactose degradation I	7738	7738	2022	Lopera-Maya et al.	Males and Females	European	log10 units	5564504	https://gwas.mrcieu.ac.uk/	ebi-a-GCST90027488
GMPW: superpathway of methylglyoxal degradation	7738	7738	2022	Lopera-Maya et al.	Males and Females	European	log10 units	5558638	https://gwas.mrcieu.ac.uk/	ebi-a-GCST90027489
GMPW: lipid IVA biosynthesis	7738	7738	2022	Lopera-Maya et al.	Males and Females	European	log10 units	5564086	https://gwas.mrcieu.ac.uk/	ebi-a-GCST90027490
GMPW: methylerythritol phosphate pathway I	7738	7738	2022	Lopera-Maya et al.	Males and Females	European	log10 units	5564153	https://gwas.mrcieu.ac.uk/	ebi-a-GCST90027491
GMPW: pentose phosphate pathway (non-oxidative branch)	7738	7738	2022	Lopera-Maya et al.	Males and Females	European	log10 units	5564153	https://gwas.mrcieu.ac.uk/	ebi-a-GCST90027492
GMPW: superpathway of ornithine degradation	7738	7738	2022	Lopera-Maya et al.	Males and Females	European	log10 units	4876942	https://gwas.mrcieu.ac.uk/	ebi-a-GCST90027493
GMPW: TCA cycle IV (2-oxoglutarate decarboxylase)	7738	7738	2022	Lopera-Maya et al.	Males and Females	European	log10 units	5563085	https://gwas.mrcieu.ac.uk/	ebi-a-GCST90027494
GMPW: pyruvate fermentation to propanoate I	7738	7738	2022	Lopera-Maya et al.	Males and Females	European	log10 units	5564283	https://gwas.mrcieu.ac.uk/	ebi-a-GCST90027495
GMPW: heterolactic fermentation	7738	7738	2022	Lopera-Maya et al.	Males and Females	European	log10 units	5563945	https://gwas.mrcieu.ac.uk/	ebi-a-GCST90027496
GMPW: acetylene degradation	7738	7738	2022	Lopera-Maya et al.	Males and Females	European	log10 units	5564100	https://gwas.mrcieu.ac.uk/	ebi-a-GCST90027497
GMPW: L-glutamate degradation V (via hydroxyglutarate)	7738	7738	2022	Lopera-Maya et al.	Males and Females	European	log10 units	5564033	https://gwas.mrcieu.ac.uk/	ebi-a-GCST90027498
GMPW: purine nucleobases degradation I (anaerobic)	7738	7738	2022	Lopera-Maya et al.	Males and Females	European	log10 units	5564706	https://gwas.mrcieu.ac.uk/	ebi-a-GCST90027499
GMPW: reductive TCA cycle I	7738	7738	2022	Lopera-Maya et al.	Males and Females	European	log10 units	5564823	https://gwas.mrcieu.ac.uk/	ebi-a-GCST90027500
GMPW: incomplete reductive TCA cycle	7738	7738	2022	Lopera-Maya et al.	Males and Females	European	log10 units	5564135	https://gwas.mrcieu.ac.uk/	ebi-a-GCST90027501
GMPW: superpathway of N-acetylneuraminate degradation	7738	7738	2022	Lopera-Maya et al.	Males and Females	European	log10 units	5564013	https://gwas.mrcieu.ac.uk/	ebi-a-GCST90027502
GMPW: hexitol fermentation to lactate, formate, ethanol and acetate	7738	7738	2022	Lopera-Maya et al.	Males and Females	European	log10 units	5476440	https://gwas.mrcieu.ac.uk/	ebi-a-GCST90027503
GMPW: phosphopantothenate biosynthesis I	7738	7738	2022	Lopera-Maya et al.	Males and Females	European	log10 units	5564153	https://gwas.mrcieu.ac.uk/	ebi-a-GCST90027504
GMPW: pantothenate and coenzyme A biosynthesis I	7738	7738	2022	Lopera-Maya et al.	Males and Females	European	log10 units	5351213	https://gwas.mrcieu.ac.uk/	ebi-a-GCST90027505
GMPW: pentose phosphate pathway	7738	7738	2022	Lopera-Maya et al.	Males and Females	European	log10 units	5563878	https://gwas.mrcieu.ac.uk/	ebi-a-GCST90027506
GMPW: peptidoglycan biosynthesis I (meso-diaminopimelate containing)	7738	7738	2022	Lopera-Maya et al.	Males and Females	European	log10 units	5564153	https://gwas.mrcieu.ac.uk/	ebi-a-GCST90027507
GMPW: superpathway of phospholipid biosynthesis I (bacteria)	7738	7738	2022	Lopera-Maya et al.	Males and Females	European	log10 units	5564183	https://gwas.mrcieu.ac.uk/	ebi-a-GCST90027508
GMPW: superpathway of polyamine biosynthesis II	7738	7738	2022	Lopera-Maya et al.	Males and Females	European	log10 units	5564410	https://gwas.mrcieu.ac.uk/	ebi-a-GCST90027509
GMPW: superpathway of polyamine biosynthesis I	7738	7738	2022	Lopera-Maya et al.	Males and Females	European	log10 units	5564022	https://gwas.mrcieu.ac.uk/	ebi-a-GCST90027510
GMPW: polyisoprenoid biosynthesis (E. coli)	7738	7738	2022	Lopera-Maya et al.	Males and Females	European	log10 units	5564045	https://gwas.mrcieu.ac.uk/	ebi-a-GCST90027511
GMPW: ppGpp biosynthesis	7738	7738	2022	Lopera-Maya et al.	Males and Females	European	log10 units	5533014	https://gwas.mrcieu.ac.uk/	ebi-a-GCST90027512
GMPW: superpathway of histidine, purine, and pyrimidine biosynthesis	7738	7738	2022	Lopera-Maya et al.	Males and Females	European	log10 units	5564020	https://gwas.mrcieu.ac.uk/	ebi-a-GCST90027513
GMPW: superpathway of L-alanine biosynthesis	7738	7738	2022	Lopera-Maya et al.	Males and Females	European	log10 units	5563714	https://gwas.mrcieu.ac.uk/	ebi-a-GCST90027514
GMPW: ADP-L-glycero-&beta;-D-manno-heptose biosynthesis	7738	7738	2022	Lopera-Maya et al.	Males and Females	European	log10 units	5563944	https://gwas.mrcieu.ac.uk/	ebi-a-GCST90027515
GMPW: anhydromuropeptides recycling	7738	7738	2022	Lopera-Maya et al.	Males and Females	European	log10 units	5564471	https://gwas.mrcieu.ac.uk/	ebi-a-GCST90027516
GMPW: purine ribonucleosides degradation	7738	7738	2022	Lopera-Maya et al.	Males and Females	European	log10 units	5564153	https://gwas.mrcieu.ac.uk/	ebi-a-GCST90027517
GMPW: superpathway of purine deoxyribonucleosides degradation	7738	7738	2022	Lopera-Maya et al.	Males and Females	European	log10 units	5564333	https://gwas.mrcieu.ac.uk/	ebi-a-GCST90027518
GMPW: superpathway of pyrimidine deoxyribonucleosides degradation	7738	7738	2022	Lopera-Maya et al.	Males and Females	European	log10 units	5564369	https://gwas.mrcieu.ac.uk/	ebi-a-GCST90027519
GMPW: polymyxin resistance	7738	7738	2022	Lopera-Maya et al.	Males and Females	European	log10 units	5564788	https://gwas.mrcieu.ac.uk/	ebi-a-GCST90027520
GMPW: superpathway of heme biosynthesis from uroporphyrinogen-III	7738	7738	2022	Lopera-Maya et al.	Males and Females	European	log10 units	5563282	https://gwas.mrcieu.ac.uk/	ebi-a-GCST90027521
GMPW: tRNA processing	7738	7738	2022	Lopera-Maya et al.	Males and Females	European	log10 units	5563803	https://gwas.mrcieu.ac.uk/	ebi-a-GCST90027522
GMPW: methylphosphonate degradation I	7738	7738	2022	Lopera-Maya et al.	Males and Females	European	log10 units	5564711	https://gwas.mrcieu.ac.uk/	ebi-a-GCST90027523
GMPW: peptidoglycan maturation (meso-diaminopimelate containing)	7738	7738	2022	Lopera-Maya et al.	Males and Females	European	log10 units	5564153	https://gwas.mrcieu.ac.uk/	ebi-a-GCST90027524
GMPW: superpathway of pyrimidine ribonucleotides de novo biosynthesis	7738	7738	2022	Lopera-Maya et al.	Males and Females	European	log10 units	5564153	https://gwas.mrcieu.ac.uk/	ebi-a-GCST90027525
GMPW: aspartate superpathway	7738	7738	2022	Lopera-Maya et al.	Males and Females	European	log10 units	5564301	https://gwas.mrcieu.ac.uk/	ebi-a-GCST90027526
GMPW: superpathway of pyridoxal 5'-phosphate biosynthesis and salvage	7738	7738	2022	Lopera-Maya et al.	Males and Females	European	log10 units	5564057	https://gwas.mrcieu.ac.uk/	ebi-a-GCST90027527
GMPW: CMP-3-deoxy-D-manno-octulosonate biosynthesis I	7738	7738	2022	Lopera-Maya et al.	Males and Females	European	log10 units	5347045	https://gwas.mrcieu.ac.uk/	ebi-a-GCST90027528
GMPW: L-lysine biosynthesis II	7738	7738	2022	Lopera-Maya et al.	Males and Females	European	log10 units	5563937	https://gwas.mrcieu.ac.uk/	ebi-a-GCST90027529
GMPW: L-lysine biosynthesis III	7738	7738	2022	Lopera-Maya et al.	Males and Females	European	log10 units	3596969	https://gwas.mrcieu.ac.uk/	ebi-a-GCST90027530
GMPW: superpathway of L-isoleucine biosynthesis I	7738	7738	2022	Lopera-Maya et al.	Males and Females	European	log10 units	5564153	https://gwas.mrcieu.ac.uk/	ebi-a-GCST90027531
GMPW: aerobic respiration I (cytochrome c)	7738	7738	2022	Lopera-Maya et al.	Males and Females	European	log10 units	4853992	https://gwas.mrcieu.ac.uk/	ebi-a-GCST90027532
GMPW: pantothenate and coenzyme A biosynthesis III	7738	7738	2022	Lopera-Maya et al.	Males and Females	European	log10 units	5431368	https://gwas.mrcieu.ac.uk/	ebi-a-GCST90027533
GMPW: urea cycle	7738	7738	2022	Lopera-Maya et al.	Males and Females	European	log10 units	4388251	https://gwas.mrcieu.ac.uk/	ebi-a-GCST90027534
GMPW: phosphatidylglycerol biosynthesis I (plastidic)	7738	7738	2022	Lopera-Maya et al.	Males and Females	European	log10 units	5564115	https://gwas.mrcieu.ac.uk/	ebi-a-GCST90027535
GMPW: biotin biosynthesis II	7738	7738	2022	Lopera-Maya et al.	Males and Females	European	log10 units	4944409	https://gwas.mrcieu.ac.uk/	ebi-a-GCST90027536
GMPW: 4-aminobutanoate degradation V	7738	7738	2022	Lopera-Maya et al.	Males and Females	European	log10 units	2927024	https://gwas.mrcieu.ac.uk/	ebi-a-GCST90027537
GMPW: L-glutamate degradation VIII (to propanoate)	7738	7738	2022	Lopera-Maya et al.	Males and Females	European	log10 units	5563101	https://gwas.mrcieu.ac.uk/	ebi-a-GCST90027538
GMPW: L-lysine biosynthesis VI	7738	7738	2022	Lopera-Maya et al.	Males and Females	European	log10 units	5564153	https://gwas.mrcieu.ac.uk/	ebi-a-GCST90027539
GMPW: pyruvate fermentation to acetate and lactate II	7738	7738	2022	Lopera-Maya et al.	Males and Females	European	log10 units	5564153	https://gwas.mrcieu.ac.uk/	ebi-a-GCST90027540
GMPW: L-isoleucine biosynthesis II	7738	7738	2022	Lopera-Maya et al.	Males and Females	European	log10 units	5563995	https://gwas.mrcieu.ac.uk/	ebi-a-GCST90027541
GMPW: L-isoleucine biosynthesis IV	7738	7738	2022	Lopera-Maya et al.	Males and Females	European	log10 units	5564173	https://gwas.mrcieu.ac.uk/	ebi-a-GCST90027542
GMPW: superpathway of geranylgeranyl diphosphate biosynthesis II (via MEP)	7738	7738	2022	Lopera-Maya et al.	Males and Females	European	log10 units	5563433	https://gwas.mrcieu.ac.uk/	ebi-a-GCST90027543
GMPW: superpathway of acetyl-CoA biosynthesis	7738	7738	2022	Lopera-Maya et al.	Males and Females	European	log10 units	5563632	https://gwas.mrcieu.ac.uk/	ebi-a-GCST90027544
GMPW: glutaryl-CoA degradation	7738	7738	2022	Lopera-Maya et al.	Males and Females	European	log10 units	5564062	https://gwas.mrcieu.ac.uk/	ebi-a-GCST90027545
GMPW: tetrapyrrole biosynthesis I (from glutamate)	7738	7738	2022	Lopera-Maya et al.	Males and Females	European	log10 units	5564153	https://gwas.mrcieu.ac.uk/	ebi-a-GCST90027546
GMPW: tetrapyrrole biosynthesis II (from glycine)	7738	7738	2022	Lopera-Maya et al.	Males and Females	European	log10 units	5564225	https://gwas.mrcieu.ac.uk/	ebi-a-GCST90027547
GMPW: superpathway of L-methionine biosynthesis (by sulfhydrylation)	7738	7738	2022	Lopera-Maya et al.	Males and Females	European	log10 units	5563921	https://gwas.mrcieu.ac.uk/	ebi-a-GCST90027548
GMPW: sucrose degradation IV (sucrose phosphorylase)	7738	7738	2022	Lopera-Maya et al.	Males and Females	European	log10 units	5564889	https://gwas.mrcieu.ac.uk/	ebi-a-GCST90027549
GMPW: L-glutamate and L-glutamine biosynthesis	7738	7738	2022	Lopera-Maya et al.	Males and Females	European	log10 units	5563923	https://gwas.mrcieu.ac.uk/	ebi-a-GCST90027550
GMPW: mannosylglycerate biosynthesis I	7738	7738	2022	Lopera-Maya et al.	Males and Females	European	log10 units	5565528	https://gwas.mrcieu.ac.uk/	ebi-a-GCST90027551
GMPW: GDP-mannose biosynthesis	7738	7738	2022	Lopera-Maya et al.	Males and Females	European	log10 units	5564153	https://gwas.mrcieu.ac.uk/	ebi-a-GCST90027552
GMPW: CDP-diacylglycerol biosynthesis I	7738	7738	2022	Lopera-Maya et al.	Males and Females	European	log10 units	5564153	https://gwas.mrcieu.ac.uk/	ebi-a-GCST90027553
GMPW: acetyl-CoA fermentation to butanoate II	7738	7738	2022	Lopera-Maya et al.	Males and Females	European	log10 units	5563907	https://gwas.mrcieu.ac.uk/	ebi-a-GCST90027554
GMPW: UMP biosynthesis	7738	7738	2022	Lopera-Maya et al.	Males and Females	European	log10 units	5564153	https://gwas.mrcieu.ac.uk/	ebi-a-GCST90027555
GMPW: urate biosynthesis/inosine 5'-phosphate degradation	7738	7738	2022	Lopera-Maya et al.	Males and Females	European	log10 units	5564153	https://gwas.mrcieu.ac.uk/	ebi-a-GCST90027556
GMPW: allantoin degradation to glyoxylate III	7738	7738	2022	Lopera-Maya et al.	Males and Females	European	log10 units	5564287	https://gwas.mrcieu.ac.uk/	ebi-a-GCST90027557
GMPW: 1,4-dihydroxy-2-naphthoate biosynthesis II (plants)	7738	7738	2022	Lopera-Maya et al.	Males and Females	European	log10 units	5564169	https://gwas.mrcieu.ac.uk/	ebi-a-GCST90027558
GMPW: superpathway of menaquinol-8 biosynthesis I	7738	7738	2022	Lopera-Maya et al.	Males and Females	European	log10 units	5564509	https://gwas.mrcieu.ac.uk/	ebi-a-GCST90027559
GMPW: superpathway of menaquinol-6 biosynthesis I	7738	7738	2022	Lopera-Maya et al.	Males and Females	European	log10 units	5563418	https://gwas.mrcieu.ac.uk/	ebi-a-GCST90027560
GMPW: TCA cycle VI (obligate autotrophs)	7738	7738	2022	Lopera-Maya et al.	Males and Females	European	log10 units	5565112	https://gwas.mrcieu.ac.uk/	ebi-a-GCST90027561
GMPW: superpathay of heme biosynthesis from glutamate	7738	7738	2022	Lopera-Maya et al.	Males and Females	European	log10 units	5563584	https://gwas.mrcieu.ac.uk/	ebi-a-GCST90027562
GMPW: superpathway of heme biosynthesis from glycine	7738	7738	2022	Lopera-Maya et al.	Males and Females	European	log10 units	5562028	https://gwas.mrcieu.ac.uk/	ebi-a-GCST90027563
GMPW: glycogen degradation II (eukaryotic)	7738	7738	2022	Lopera-Maya et al.	Males and Females	European	log10 units	5564254	https://gwas.mrcieu.ac.uk/	ebi-a-GCST90027564
GMPW: palmitate biosynthesis II (bacteria and plants)	7738	7738	2022	Lopera-Maya et al.	Males and Females	European	log10 units	5564602	https://gwas.mrcieu.ac.uk/	ebi-a-GCST90027565
GMPW: cis-vaccenate biosynthesis	7738	7738	2022	Lopera-Maya et al.	Males and Females	European	log10 units	5564153	https://gwas.mrcieu.ac.uk/	ebi-a-GCST90027566
GMPW: stearate biosynthesis II (bacteria and plants)	7738	7738	2022	Lopera-Maya et al.	Males and Females	European	log10 units	5563917	https://gwas.mrcieu.ac.uk/	ebi-a-GCST90027567
GMPW: 5-aminoimidazole ribonucleotide biosynthesis I	7738	7738	2022	Lopera-Maya et al.	Males and Females	European	log10 units	5564153	https://gwas.mrcieu.ac.uk/	ebi-a-GCST90027568
GMPW: inosine-5'-phosphate biosynthesis I	7738	7738	2022	Lopera-Maya et al.	Males and Females	European	log10 units	5564153	https://gwas.mrcieu.ac.uk/	ebi-a-GCST90027569
GMPW: superpathway of guanosine nucleotides de novo biosynthesis II	7738	7738	2022	Lopera-Maya et al.	Males and Females	European	log10 units	5564153	https://gwas.mrcieu.ac.uk/	ebi-a-GCST90027570
GMPW: 6-hydroxymethyl-dihydropterin diphosphate biosynthesis I	7738	7738	2022	Lopera-Maya et al.	Males and Females	European	log10 units	5563895	https://gwas.mrcieu.ac.uk/	ebi-a-GCST90027571
GMPW: S-adenosyl-L-methionine cycle I	7738	7738	2022	Lopera-Maya et al.	Males and Females	European	log10 units	5564153	https://gwas.mrcieu.ac.uk/	ebi-a-GCST90027572
GMPW: chorismate biosynthesis from 3-dehydroquinate	7738	7738	2022	Lopera-Maya et al.	Males and Females	European	log10 units	5564153	https://gwas.mrcieu.ac.uk/	ebi-a-GCST90027573
GMPW: sucrose degradation III (sucrose invertase)	7738	7738	2022	Lopera-Maya et al.	Males and Females	European	log10 units	5564021	https://gwas.mrcieu.ac.uk/	ebi-a-GCST90027574
GMPW: superpathway of menaquinol-8 biosynthesis II	7738	7738	2022	Lopera-Maya et al.	Males and Females	European	log10 units	5564794	https://gwas.mrcieu.ac.uk/	ebi-a-GCST90027575
GMPW: superpathway of unsaturated fatty acids biosynthesis (E. coli)	7738	7738	2022	Lopera-Maya et al.	Males and Females	European	log10 units	5564602	https://gwas.mrcieu.ac.uk/	ebi-a-GCST90027576
GMPW: superpathway of fatty acids biosynthesis (E. coli)	7738	7738	2022	Lopera-Maya et al.	Males and Females	European	log10 units	5564471	https://gwas.mrcieu.ac.uk/	ebi-a-GCST90027577
GMPW: galactose degradation I (Leloir pathway)	7738	7738	2022	Lopera-Maya et al.	Males and Females	European	log10 units	5564153	https://gwas.mrcieu.ac.uk/	ebi-a-GCST90027578
GMPW: purine nucleotides degradation II (aerobic)	7738	7738	2022	Lopera-Maya et al.	Males and Females	European	log10 units	5564134	https://gwas.mrcieu.ac.uk/	ebi-a-GCST90027579
GMPW: peptidoglycan biosynthesis IV (Enterococcus faecium)	7738	7738	2022	Lopera-Maya et al.	Males and Females	European	log10 units	5560952	https://gwas.mrcieu.ac.uk/	ebi-a-GCST90027580
GMPW: 4-deoxy-L-threo-hex-4-enopyranuronate degradation	7738	7738	2022	Lopera-Maya et al.	Males and Females	European	log10 units	5564076	https://gwas.mrcieu.ac.uk/	ebi-a-GCST90027581
GMPW: 8-amino-7-oxononanoate biosynthesis I	7738	7738	2022	Lopera-Maya et al.	Males and Females	European	log10 units	5564340	https://gwas.mrcieu.ac.uk/	ebi-a-GCST90027582
GMPW: pyrimidine deoxyribonucleotides de novo biosynthesis III	7738	7738	2022	Lopera-Maya et al.	Males and Females	European	log10 units	5564153	https://gwas.mrcieu.ac.uk/	ebi-a-GCST90027583
GMPW: pyruvate fermentation to acetone	7738	7738	2022	Lopera-Maya et al.	Males and Females	European	log10 units	5563568	https://gwas.mrcieu.ac.uk/	ebi-a-GCST90027584
GMPW: superpathway of Clostridium acetobutylicum acidogenic fermentation	7738	7738	2022	Lopera-Maya et al.	Males and Females	European	log10 units	5563446	https://gwas.mrcieu.ac.uk/	ebi-a-GCST90027585
GMPW: guanosine nucleotides degradation III	7738	7738	2022	Lopera-Maya et al.	Males and Females	European	log10 units	5564043	https://gwas.mrcieu.ac.uk/	ebi-a-GCST90027586
GMPW: adenine and adenosine salvage III	7738	7738	2022	Lopera-Maya et al.	Males and Females	European	log10 units	5564153	https://gwas.mrcieu.ac.uk/	ebi-a-GCST90027587
GMPW: superpathway of tetrahydrofolate biosynthesis	7738	7738	2022	Lopera-Maya et al.	Males and Females	European	log10 units	5564287	https://gwas.mrcieu.ac.uk/	ebi-a-GCST90027588
GMPW: superpathway of L-phenylalanine biosynthesis	7738	7738	2022	Lopera-Maya et al.	Males and Females	European	log10 units	5563672	https://gwas.mrcieu.ac.uk/	ebi-a-GCST90027589
GMPW: superpathway of L-tryptophan biosynthesis	7738	7738	2022	Lopera-Maya et al.	Males and Females	European	log10 units	5565429	https://gwas.mrcieu.ac.uk/	ebi-a-GCST90027590
GMPW: superpathway of L-tyrosine biosynthesis	7738	7738	2022	Lopera-Maya et al.	Males and Females	European	log10 units	5565644	https://gwas.mrcieu.ac.uk/	ebi-a-GCST90027591
GMPW: D-galactose degradation V (Leloir pathway)	7738	7738	2022	Lopera-Maya et al.	Males and Females	European	log10 units	5564153	https://gwas.mrcieu.ac.uk/	ebi-a-GCST90027592
GMPW: cinnamate and 3-hydroxycinnamate degradation to 2-oxopent-4-enoate	7738	7738	2022	Lopera-Maya et al.	Males and Females	European	log10 units	5564899	https://gwas.mrcieu.ac.uk/	ebi-a-GCST90027593
GMPW: queuosine biosynthesis	7738	7738	2022	Lopera-Maya et al.	Males and Females	European	log10 units	5564153	https://gwas.mrcieu.ac.uk/	ebi-a-GCST90027594
GMPW: preQ0 biosynthesis	7738	7738	2022	Lopera-Maya et al.	Males and Females	European	log10 units	5564153	https://gwas.mrcieu.ac.uk/	ebi-a-GCST90027595
GMPW: ubiquinol-8 biosynthesis (prokaryotic)	7738	7738	2022	Lopera-Maya et al.	Males and Females	European	log10 units	5564531	https://gwas.mrcieu.ac.uk/	ebi-a-GCST90027596
GMPW: starch degradation III	7738	7738	2022	Lopera-Maya et al.	Males and Females	European	log10 units	5561961	https://gwas.mrcieu.ac.uk/	ebi-a-GCST90027597
GMPW: starch degradation V	7738	7738	2022	Lopera-Maya et al.	Males and Females	European	log10 units	5564153	https://gwas.mrcieu.ac.uk/	ebi-a-GCST90027598
GMPW: molybdenum cofactor biosynthesis	7738	7738	2022	Lopera-Maya et al.	Males and Females	European	log10 units	5563299	https://gwas.mrcieu.ac.uk/	ebi-a-GCST90027599
GMPW: thiazole biosynthesis II (Bacillus)	7738	7738	2022	Lopera-Maya et al.	Males and Females	European	log10 units	5564639	https://gwas.mrcieu.ac.uk/	ebi-a-GCST90027600
GMPW: thiazole biosynthesis I (E. coli)	7738	7738	2022	Lopera-Maya et al.	Males and Females	European	log10 units	5564404	https://gwas.mrcieu.ac.uk/	ebi-a-GCST90027601
GMPW: thiamin salvage II	7738	7738	2022	Lopera-Maya et al.	Males and Females	European	log10 units	5483894	https://gwas.mrcieu.ac.uk/	ebi-a-GCST90027602
GMPW: superpathway of glucose and xylose degradation	7738	7738	2022	Lopera-Maya et al.	Males and Females	European	log10 units	5563698	https://gwas.mrcieu.ac.uk/	ebi-a-GCST90027603
GMPW: TCA cycle V (2-oxoglutarate:ferredoxin oxidoreductase)	7738	7738	2022	Lopera-Maya et al.	Males and Females	European	log10 units	5564108	https://gwas.mrcieu.ac.uk/	ebi-a-GCST90027604
GMPW: glycerol degradation to butanol	7738	7738	2022	Lopera-Maya et al.	Males and Females	European	log10 units	5563745	https://gwas.mrcieu.ac.uk/	ebi-a-GCST90027605
GMPW: L-1,2-propanediol degradation	7738	7738	2022	Lopera-Maya et al.	Males and Females	European	log10 units	5564147	https://gwas.mrcieu.ac.uk/	ebi-a-GCST90027606
GMPW: pyrimidine deoxyribonucleotides de novo biosynthesis II	7738	7738	2022	Lopera-Maya et al.	Males and Females	European	log10 units	5564153	https://gwas.mrcieu.ac.uk/	ebi-a-GCST90027607
GMPW: superpathway of pyrimidine ribonucleosides salvage	7738	7738	2022	Lopera-Maya et al.	Males and Females	European	log10 units	5563962	https://gwas.mrcieu.ac.uk/	ebi-a-GCST90027608
GMPW: pyrimidine deoxyribonucleotide phosphorylation	7738	7738	2022	Lopera-Maya et al.	Males and Females	European	log10 units	5564153	https://gwas.mrcieu.ac.uk/	ebi-a-GCST90027609
GMPW: pyrimidine deoxyribonucleotides de novo biosynthesis IV	7738	7738	2022	Lopera-Maya et al.	Males and Females	European	log10 units	3514837	https://gwas.mrcieu.ac.uk/	ebi-a-GCST90027610
GMPW: pyrimidine deoxyribonucleosides salvage	7738	7738	2022	Lopera-Maya et al.	Males and Females	European	log10 units	5564090	https://gwas.mrcieu.ac.uk/	ebi-a-GCST90027611
GMPW: superpathway of pyrimidine ribonucleosides degradation	7738	7738	2022	Lopera-Maya et al.	Males and Females	European	log10 units	5564311	https://gwas.mrcieu.ac.uk/	ebi-a-GCST90027612
GMPW: superpathway of pyrimidine deoxyribonucleotides de novo biosynthesis	7738	7738	2022	Lopera-Maya et al.	Males and Females	European	log10 units	5563940	https://gwas.mrcieu.ac.uk/	ebi-a-GCST90027613
GMPW: adenosine ribonucleotides de novo biosynthesis	7738	7738	2022	Lopera-Maya et al.	Males and Females	European	log10 units	5564153	https://gwas.mrcieu.ac.uk/	ebi-a-GCST90027614
GMPW: guanosine ribonucleotides de novo biosynthesis	7738	7738	2022	Lopera-Maya et al.	Males and Females	European	log10 units	5564153	https://gwas.mrcieu.ac.uk/	ebi-a-GCST90027615
GMPW: inosine-5'-phosphate biosynthesis III	7738	7738	2022	Lopera-Maya et al.	Males and Females	European	log10 units	5564062	https://gwas.mrcieu.ac.uk/	ebi-a-GCST90027616
GMPW: myo-, chiro- and scillo-inositol degradation	7738	7738	2022	Lopera-Maya et al.	Males and Females	European	log10 units	5564419	https://gwas.mrcieu.ac.uk/	ebi-a-GCST90027617
GMPW: superpathway of L-lysine, L-threonine and L-methionine biosynthesis II	7738	7738	2022	Lopera-Maya et al.	Males and Females	European	log10 units	5564153	https://gwas.mrcieu.ac.uk/	ebi-a-GCST90027618
GMPW: TCA cycle VII (acetate-producers)	7738	7738	2022	Lopera-Maya et al.	Males and Females	European	log10 units	5565363	https://gwas.mrcieu.ac.uk/	ebi-a-GCST90027619
GMPW: dTDP-N-acetylthomosamine biosynthesis	7738	7738	2022	Lopera-Maya et al.	Males and Females	European	log10 units	5565722	https://gwas.mrcieu.ac.uk/	ebi-a-GCST90027620
GMPW: superpathway of GDP-mannose-derived O-antigen building blocks biosynthesis	7738	7738	2022	Lopera-Maya et al.	Males and Females	European	log10 units	5564144	https://gwas.mrcieu.ac.uk/	ebi-a-GCST90027621
GMPW: superpathway of UDP-glucose-derived O-antigen building blocks biosynthesis	7738	7738	2022	Lopera-Maya et al.	Males and Females	European	log10 units	5563881	https://gwas.mrcieu.ac.uk/	ebi-a-GCST90027622
GMPW: 1,4-dihydroxy-6-naphthoate biosynthesis II	7738	7738	2022	Lopera-Maya et al.	Males and Females	European	log10 units	5564847	https://gwas.mrcieu.ac.uk/	ebi-a-GCST90027623
GMPW: taxadiene biosynthesis (engineered)	7738	7738	2022	Lopera-Maya et al.	Males and Females	European	log10 units	5563713	https://gwas.mrcieu.ac.uk/	ebi-a-GCST90027624
GMPW: L-arginine biosynthesis IV (archaebacteria)	7738	7738	2022	Lopera-Maya et al.	Males and Females	European	log10 units	5563887	https://gwas.mrcieu.ac.uk/	ebi-a-GCST90027625
GMPW: sulfoglycolysis	7738	7738	2022	Lopera-Maya et al.	Males and Females	European	log10 units	5564692	https://gwas.mrcieu.ac.uk/	ebi-a-GCST90027626
GMPW: mannan degradation	7738	7738	2022	Lopera-Maya et al.	Males and Females	European	log10 units	5564411	https://gwas.mrcieu.ac.uk/	ebi-a-GCST90027627
GMPW: superpathway of purine nucleotides de novo biosynthesis I	7738	7738	2022	Lopera-Maya et al.	Males and Females	European	log10 units	5564153	https://gwas.mrcieu.ac.uk/	ebi-a-GCST90027628
GMPW: superpathway of arginine and polyamine biosynthesis	7738	7738	2022	Lopera-Maya et al.	Males and Females	European	log10 units	5564148	https://gwas.mrcieu.ac.uk/	ebi-a-GCST90027629
GMPW: superpathway of glycolysis and Entner-Doudoroff	7738	7738	2022	Lopera-Maya et al.	Males and Females	European	log10 units	5563936	https://gwas.mrcieu.ac.uk/	ebi-a-GCST90027630
GMPW: glycolysis I (from glucose 6-phosphate)	7738	7738	2022	Lopera-Maya et al.	Males and Females	European	log10 units	5563857	https://gwas.mrcieu.ac.uk/	ebi-a-GCST90027631
GMPW: glyoxylate cycle	7738	7738	2022	Lopera-Maya et al.	Males and Females	European	log10 units	5564048	https://gwas.mrcieu.ac.uk/	ebi-a-GCST90027632
GMPW: heme biosynthesis I (aerobic)	7738	7738	2022	Lopera-Maya et al.	Males and Females	European	log10 units	5564042	https://gwas.mrcieu.ac.uk/	ebi-a-GCST90027633
GMPW: NAD salvage pathway II	7738	7738	2022	Lopera-Maya et al.	Males and Females	European	log10 units	5563629	https://gwas.mrcieu.ac.uk/	ebi-a-GCST90027634
GMPW: TCA cycle VIII (helicobacter)	7738	7738	2022	Lopera-Maya et al.	Males and Females	European	log10 units	5564011	https://gwas.mrcieu.ac.uk/	ebi-a-GCST90027635
GMPW: superpathway of glyoxylate bypass and TCA	7738	7738	2022	Lopera-Maya et al.	Males and Females	European	log10 units	5564041	https://gwas.mrcieu.ac.uk/	ebi-a-GCST90027636
GMPW: NAD salvage pathway I	7738	7738	2022	Lopera-Maya et al.	Males and Females	European	log10 units	5564241	https://gwas.mrcieu.ac.uk/	ebi-a-GCST90027637
GMPW: NAD biosynthesis I (from aspartate)	7738	7738	2022	Lopera-Maya et al.	Males and Females	European	log10 units	5564103	https://gwas.mrcieu.ac.uk/	ebi-a-GCST90027638
GMPW: pyridoxal 5'-phosphate biosynthesis I	7738	7738	2022	Lopera-Maya et al.	Males and Females	European	log10 units	5564005	https://gwas.mrcieu.ac.uk/	ebi-a-GCST90027639
GMPW: L-rhamnose degradation I	7738	7738	2022	Lopera-Maya et al.	Males and Females	European	log10 units	5564153	https://gwas.mrcieu.ac.uk/	ebi-a-GCST90027640
GMPW: flavin biosynthesis I (bacteria and plants)	7738	7738	2022	Lopera-Maya et al.	Males and Females	European	log10 units	5563916	https://gwas.mrcieu.ac.uk/	ebi-a-GCST90027641
GMPW: superpathway of L-serine and glycine biosynthesis I	7738	7738	2022	Lopera-Maya et al.	Males and Females	European	log10 units	5564153	https://gwas.mrcieu.ac.uk/	ebi-a-GCST90027642
GMPW: sulfate reduction I (assimilatory)	7738	7738	2022	Lopera-Maya et al.	Males and Females	European	log10 units	5563593	https://gwas.mrcieu.ac.uk/	ebi-a-GCST90027643
GMPW: superpathway of sulfate assimilation and cysteine biosynthesis	7738	7738	2022	Lopera-Maya et al.	Males and Females	European	log10 units	5563685	https://gwas.mrcieu.ac.uk/	ebi-a-GCST90027644
GMPW: superpathway of L-threonine biosynthesis	7738	7738	2022	Lopera-Maya et al.	Males and Females	European	log10 units	5564153	https://gwas.mrcieu.ac.uk/	ebi-a-GCST90027645
GMPW: tRNA charging	7738	7738	2022	Lopera-Maya et al.	Males and Females	European	log10 units	5564153	https://gwas.mrcieu.ac.uk/	ebi-a-GCST90027646
GMPW: L-tryptophan biosynthesis	7738	7738	2022	Lopera-Maya et al.	Males and Females	European	log10 units	5564202	https://gwas.mrcieu.ac.uk/	ebi-a-GCST90027647
GMPW: superpathway of ubiquinol-8 biosynthesis (prokaryotic)	7738	7738	2022	Lopera-Maya et al.	Males and Females	European	log10 units	5564372	https://gwas.mrcieu.ac.uk/	ebi-a-GCST90027648
GMPW: UDP-N-acetyl-D-glucosamine biosynthesis I	7738	7738	2022	Lopera-Maya et al.	Males and Females	European	log10 units	5564215	https://gwas.mrcieu.ac.uk/	ebi-a-GCST90027649
GMPW: N10-formyl-tetrahydrofolate biosynthesis	7738	7738	2022	Lopera-Maya et al.	Males and Females	European	log10 units	5564153	https://gwas.mrcieu.ac.uk/	ebi-a-GCST90027650

## Sheet: 2
Supplementary Table 2. MR results for all batches
Note: OR, Odds Ratio; Upper: Maximum value of the 95% Confidence Interval; Lower: Minimum value of the 95% Confidence Interval.
Batch	Exposure	Outcome	Method	OR	Upper	Lower	Pval	Power
1	Glutamine	Crohn's disease of colon	MR RAPS	1.97655	949.5	0.00411454	0.828768	0.0615522
2	Tryptophan	Crohn's disease of colon	Inverse variance weighted (multiplicative random effects)	0.399989	5.38929	0.0296869	0.489837	0.0643767
2	Tryptophan	Crohn's disease of colon	MR Egger	0.0128531	5.05e+18	3.27e-23	0.847648	0.0896467
2	Tryptophan	Crohn's disease of colon	Inverse variance weighted (fixed effects)	0.399989	11.7544	0.0136112	0.595232	0.0643767
2	Tryptophan	Crohn's disease of colon	Weighted median	0.302326	31.1696	0.00293238	0.61301	0.069519
2	Tryptophan	Crohn's disease of colon	Weighted mode	15.1868	95904.9	0.00240486	0.551426	1
2	Tryptophan	Crohn's disease of colon	MR RAPS	0.393939	13.141	0.0118095	0.602654	0.0646717
4	Leucine	Crohn's disease of colon	Inverse variance weighted (multiplicative random effects)	1.22929	27.2657	0.0554231	0.896128	0.0515474
4	Leucine	Crohn's disease of colon	MR Egger	1.06441e+07	1.14e+19	9.9e-06	0.225452	1
4	Leucine	Crohn's disease of colon	Inverse variance weighted (fixed effects)	1.22929	60.1011	0.0251434	0.91715	0.0515474
4	Leucine	Crohn's disease of colon	Weighted median	1.26679	254.292	0.00631069	0.930336	0.0520952
4	Leucine	Crohn's disease of colon	Weighted mode	24.5439	107048	0.00562743	0.471393	1
4	Leucine	Crohn's disease of colon	MR RAPS	1.2333	68.8088	0.0221052	0.9186	0.0516021
6	Phenylalanine	Crohn's disease of colon	MR RAPS	2.96276	55491.7	0.000158185	0.828685	0.068986
7	Creatinine	Crohn's disease of colon	MR RAPS	228.206	3.44016e+08	0.000151383	0.454363	1
8	Lactate	Crohn's disease of colon	Inverse variance weighted (multiplicative random effects)	0.231877	1.30988	0.0410473	0.0980381	0.105332
8	Lactate	Crohn's disease of colon	MR Egger	2.06987	2708.53	0.0015818	0.821864	0.157666
8	Lactate	Crohn's disease of colon	Inverse variance weighted (fixed effects)	0.231877	1.84308	0.0291724	0.167006	0.105332
8	Lactate	Crohn's disease of colon	Weighted median	0.241219	3.5163	0.0165477	0.298239	0.103957
8	Lactate	Crohn's disease of colon	Weighted mode	0.20489	7.50811	0.00559127	0.413366	0.109407
8	Lactate	Crohn's disease of colon	MR RAPS	0.222687	2.04483	0.0242513	0.18428	0.106702
9	3-hydroxybutyrate (BHBA)	Crohn's disease of colon	Inverse variance weighted (multiplicative random effects)	0.959779	1.39742	0.659197	0.830409	0.0533538
9	3-hydroxybutyrate (BHBA)	Crohn's disease of colon	MR Egger	0.923405	1.74512	0.488607	0.781172	0.0622294
9	3-hydroxybutyrate (BHBA)	Crohn's disease of colon	Inverse variance weighted (fixed effects)	0.959779	1.42897	0.644642	0.83979	0.0533538
9	3-hydroxybutyrate (BHBA)	Crohn's disease of colon	Weighted median	1.06691	1.8692	0.608978	0.820895	0.059306
9	3-hydroxybutyrate (BHBA)	Crohn's disease of colon	Weighted mode	0.984097	1.81398	0.533879	0.960285	0.0505233
9	3-hydroxybutyrate (BHBA)	Crohn's disease of colon	MR RAPS	0.95797	1.4544	0.630988	0.840255	0.053663
10	Arabinose	Crohn's disease of colon	Inverse variance weighted (multiplicative random effects)	1.01397	1.89363	0.542944	0.965279	0.0500599
10	Arabinose	Crohn's disease of colon	MR Egger	0.541597	3.31911	0.0883754	0.394319	0.116959
10	Arabinose	Crohn's disease of colon	Inverse variance weighted (fixed effects)	1.01397	2.01647	0.509868	0.968452	0.0500599
10	Arabinose	Crohn's disease of colon	Weighted median	0.97583	2.13359	0.446311	0.951118	0.0501795
10	Arabinose	Crohn's disease of colon	Weighted mode	0.839324	1.71878	0.409862	0.664707	0.057979
10	Arabinose	Crohn's disease of colon	MR RAPS	1.01429	2.1063	0.488429	0.969647	0.0500627
11	Fructose	Crohn's disease of colon	Inverse variance weighted (multiplicative random effects)	0.49277	37.6289	0.00645307	0.74901	0.0722716
11	Fructose	Crohn's disease of colon	MR Egger	839.408	9.05e+16	7.79e-12	0.534695	1
11	Fructose	Crohn's disease of colon	Inverse variance weighted (fixed effects)	0.49277	5.48311	0.0442855	0.564808	0.0722716
11	Fructose	Crohn's disease of colon	Weighted median	0.095292	2.67663	0.00339254	0.167146	0.12282
11	Fructose	Crohn's disease of colon	Weighted mode	0.0489869	5.41508	0.000443154	0.335843	0.130739
11	Fructose	Crohn's disease of colon	MR RAPS	0.451234	5.25529	0.0387442	0.525221	0.0761341
13	Pyruvate	Crohn's disease of colon	Inverse variance weighted (multiplicative random effects)	0.307317	0.818751	0.115351	0.0182754	0.244015
13	Pyruvate	Crohn's disease of colon	MR Egger	0.101138	3.38633	0.00302063	0.18144	0.376007
13	Pyruvate	Crohn's disease of colon	Inverse variance weighted (fixed effects)	0.307317	0.894153	0.105624	0.0303631	0.244015
13	Pyruvate	Crohn's disease of colon	Weighted median	0.669019	2.96922	0.150742	0.597053	0.0925516
13	Pyruvate	Crohn's disease of colon	Weighted mode	0.813006	8.69487	0.0760195	0.867159	0.0633667
13	Pyruvate	Crohn's disease of colon	MR RAPS	0.296939	0.920608	0.0957768	0.0354405	0.249979
14	Uridine	Crohn's disease of colon	Inverse variance weighted (multiplicative random effects)	0.273022	66.4885	0.00112111	0.64334	0.0647583
14	Uridine	Crohn's disease of colon	MR Egger	3.97138e+07	1.38e+27	1.14e-12	0.342939	1
14	Uridine	Crohn's disease of colon	Inverse variance weighted (fixed effects)	0.273022	18.7664	0.00397204	0.547512	0.0647583
14	Uridine	Crohn's disease of colon	Weighted median	0.0448916	7.91966	0.000254463	0.239626	0.0757155
14	Uridine	Crohn's disease of colon	Weighted mode	0.00677426	33.0866	1.39e-06	0.368252	0.077857
14	Uridine	Crohn's disease of colon	MR RAPS	0.263822	20.078	0.00346657	0.5466	0.0651395
15	Linoleate (18:2n6)	Crohn's disease of colon	Inverse variance weighted (multiplicative random effects)	1.80087	8.3046	0.390522	0.450657	0.153934
15	Linoleate (18:2n6)	Crohn's disease of colon	MR Egger	3318.4	4.56235e+06	2.41363	0.0317078	1
15	Linoleate (18:2n6)	Crohn's disease of colon	Inverse variance weighted (fixed effects)	1.80087	9.34956	0.346875	0.483902	0.153934
15	Linoleate (18:2n6)	Crohn's disease of colon	Weighted median	1.38461	12.8158	0.149592	0.7744	0.0732915
15	Linoleate (18:2n6)	Crohn's disease of colon	Weighted mode	1.19789	49.3232	0.0290924	0.925514	0.0561154
15	Linoleate (18:2n6)	Crohn's disease of colon	MR RAPS	1.83924	10.4222	0.324577	0.491113	0.164419
16	Allantoin	Crohn's disease of colon	Inverse variance weighted (multiplicative random effects)	0.529692	1.19888	0.23403	0.127318	0.181676
16	Allantoin	Crohn's disease of colon	MR Egger	0.596933	10.3779	0.0343353	0.703132	0.145822
16	Allantoin	Crohn's disease of colon	Inverse variance weighted (fixed effects)	0.529692	1.25638	0.223319	0.149284	0.181676
16	Allantoin	Crohn's disease of colon	Weighted median	0.64939	2.35865	0.178792	0.511794	0.121921
16	Allantoin	Crohn's disease of colon	Weighted mode	0.68904	3.02412	0.156997	0.62985	0.106221
16	Allantoin	Crohn's disease of colon	MR RAPS	0.518217	1.30394	0.205952	0.162627	0.188373
18	Deoxycholate	Crohn's disease of colon	MR RAPS	0.698535	5.53085	0.0882235	0.733969	0.0600198
19	Margarate (17:0)	Crohn's disease of colon	MR RAPS	0.121516	6.24154	0.00236577	0.294275	0.0871287
20	Inosine	Crohn's disease of colon	MR RAPS	0.452518	1.32526	0.154515	0.148082	0.195579
21	Isoleucine	Crohn's disease of colon	Inverse variance weighted (multiplicative random effects)	0.465492	3.08448	0.0702496	0.428044	0.075511
21	Isoleucine	Crohn's disease of colon	MR Egger	0.509449	120.877	0.00214713	0.79733	0.0714304
21	Isoleucine	Crohn's disease of colon	Inverse variance weighted (fixed effects)	0.465492	4.1335	0.0524212	0.492523	0.075511
21	Isoleucine	Crohn's disease of colon	Weighted median	0.592361	11.7571	0.0298452	0.731242	0.0647302
21	Isoleucine	Crohn's disease of colon	Weighted mode	0.416076	23.8309	0.0072645	0.676787	0.0805422
21	Isoleucine	Crohn's disease of colon	MR RAPS	0.456095	4.62796	0.0449491	0.506661	0.0764314
22	Threonine	Crohn's disease of colon	Inverse variance weighted (multiplicative random effects)	0.471258	1.72002	0.129117	0.254717	0.0941986
22	Threonine	Crohn's disease of colon	MR Egger	0.00592639	12.8371	2.74e-06	0.173665	0.212404
22	Threonine	Crohn's disease of colon	Inverse variance weighted (fixed effects)	0.471258	2.58778	0.0858204	0.386594	0.0941986
22	Threonine	Crohn's disease of colon	Weighted median	0.548326	4.79382	0.0627187	0.587004	0.0820431
22	Threonine	Crohn's disease of colon	Weighted mode	0.771321	17.6605	0.0336874	0.873584	0.05809
22	Threonine	Crohn's disease of colon	MR RAPS	0.463697	2.8436	0.0756138	0.40622	0.0955019
23	Tyrosine	Crohn's disease of colon	Inverse variance weighted (multiplicative random effects)	0.571703	18.3562	0.0178057	0.752075	0.0545773
23	Tyrosine	Crohn's disease of colon	MR Egger	34.2143	3.97e+48	2.95e-46	0.911288	1
23	Tyrosine	Crohn's disease of colon	Inverse variance weighted (fixed effects)	0.571703	32.8147	0.00996032	0.786704	0.0545773
23	Tyrosine	Crohn's disease of colon	Weighted median	0.859695	98.1813	0.00752766	0.950134	0.0504884
23	Tyrosine	Crohn's disease of colon	Weighted mode	2.27219	1137.29	0.00453959	0.819985	0.0907906
23	Tyrosine	Crohn's disease of colon	MR RAPS	0.568101	36.7649	0.00877845	0.79041	0.0546551
24	Lysine	Crohn's disease of colon	MR RAPS	0.0609169	15.3799	0.00024128	0.321418	0.0632523
25	Methionine	Crohn's disease of colon	MR RAPS	970.053	2.33533e+07	0.0402943	0.181522	1
26	Malate	Crohn's disease of colon	MR RAPS	0.103641	10.8229	0.000992465	0.339179	0.0685345
28	Nonadecanoate (19:0)	Crohn's disease of colon	MR RAPS	0.0339929	22.7347	5.08e-05	0.308287	0.0670644
29	Stearate (18:0)	Crohn's disease of colon	Inverse variance weighted (multiplicative random effects)	0.822864	619.721	0.0010926	0.953998	0.0512035
29	Stearate (18:0)	Crohn's disease of colon	Inverse variance weighted (fixed effects)	0.822864	42.5026	0.0159309	0.922825	0.0512035
29	Stearate (18:0)	Crohn's disease of colon	MR RAPS	0.818308	44.7227	0.0149729	0.921751	0.0512663
30	Oleate (18:1n9)	Crohn's disease of colon	MR RAPS	30.7568	8360.76	0.113145	0.230906	1
31	Pentadecanoate (15:0)	Crohn's disease of colon	MR RAPS	0.115481	66.6753	0.000200013	0.505793	0.0599726
32	Myristate (14:0)	Crohn's disease of colon	Inverse variance weighted (multiplicative random effects)	0.949438	2.87394	0.313657	0.926842	0.0508697
32	Myristate (14:0)	Crohn's disease of colon	MR Egger	1.9447	16.7972	0.225148	0.527609	0.368485
32	Myristate (14:0)	Crohn's disease of colon	Inverse variance weighted (fixed effects)	0.949438	2.74596	0.328276	0.923714	0.0508697
32	Myristate (14:0)	Crohn's disease of colon	Weighted median	1.29416	5.70661	0.293493	0.733385	0.0798251
32	Myristate (14:0)	Crohn's disease of colon	Weighted mode	0.904131	6.41069	0.127514	0.920677	0.0531323
32	Myristate (14:0)	Crohn's disease of colon	MR RAPS	0.947174	2.8935	0.310053	0.924113	0.0509494
33	Pipecolate	Crohn's disease of colon	MR RAPS	16.0767	361.739	0.714494	0.0803996	1
34	Ornithine	Crohn's disease of colon	Inverse variance weighted (multiplicative random effects)	0.548137	4.6171	0.0650742	0.580274	0.064966
34	Ornithine	Crohn's disease of colon	MR Egger	0.503989	2033.31	0.000124922	0.833496	0.0680738
34	Ornithine	Crohn's disease of colon	Inverse variance weighted (fixed effects)	0.548137	5.74285	0.052318	0.615931	0.064966
34	Ornithine	Crohn's disease of colon	Weighted median	0.705909	16.6702	0.0298921	0.829076	0.0562967
34	Ornithine	Crohn's disease of colon	Weighted mode	0.657328	17.1484	0.0251965	0.813356	0.0585648
34	Ornithine	Crohn's disease of colon	MR RAPS	0.540035	6.54069	0.0445883	0.628266	0.0655137
35	5-oxoproline	Crohn's disease of colon	MR RAPS	0.258283	2.14412	0.0311131	0.209971	0.109212
36	Pantothenate	Crohn's disease of colon	MR RAPS	59.3825	7147.08	0.493388	0.0947307	1
37	4-acetamidobutanoate	Crohn's disease of colon	Inverse variance weighted (multiplicative random effects)	1.40696	2.15902	0.916872	0.118108	0.0615363
37	4-acetamidobutanoate	Crohn's disease of colon	Inverse variance weighted (fixed effects)	1.40696	16.3222	0.121279	0.784834	0.0615363
37	4-acetamidobutanoate	Crohn's disease of colon	MR RAPS	1.40702	16.7708	0.118045	0.787103	0.0615395
38	Alpha-tocopherol	Crohn's disease of colon	Inverse variance weighted (multiplicative random effects)	1.38006	5.15594	0.369394	0.631917	0.0838611
38	Alpha-tocopherol	Crohn's disease of colon	MR Egger	0.153722	7.21016	0.00327737	0.298799	0.226694
38	Alpha-tocopherol	Crohn's disease of colon	Inverse variance weighted (fixed effects)	1.38006	4.97881	0.382536	0.62266	0.0838611
38	Alpha-tocopherol	Crohn's disease of colon	Weighted median	0.878074	5.04727	0.152758	0.884141	0.0534422
38	Alpha-tocopherol	Crohn's disease of colon	Weighted mode	0.629756	5.6016	0.0707999	0.689249	0.0823213
38	Alpha-tocopherol	Crohn's disease of colon	MR RAPS	1.3979	5.42964	0.359901	0.628487	0.0871679
39	Citrate	Crohn's disease of colon	Inverse variance weighted (multiplicative random effects)	2.42472	20.3219	0.289307	0.414176	0.188888
39	Citrate	Crohn's disease of colon	MR Egger	1415.94	4.83496e+08	0.00414666	0.217078	1
39	Citrate	Crohn's disease of colon	Inverse variance weighted (fixed effects)	2.42472	37.0633	0.158628	0.524372	0.188888
39	Citrate	Crohn's disease of colon	Weighted median	3.7505	104.633	0.134434	0.436344	0.549908
39	Citrate	Crohn's disease of colon	Weighted mode	3.39817	507.571	0.0227506	0.652222	0.441991
39	Citrate	Crohn's disease of colon	MR RAPS	2.45097	41.6935	0.144081	0.535231	0.194197
40	Glycerate	Crohn's disease of colon	Inverse variance weighted (multiplicative random effects)	0.793943	8.39676	0.07507	0.847939	0.0552902
40	Glycerate	Crohn's disease of colon	MR Egger	0.723994	2961.26	0.000177008	0.932938	0.059522
40	Glycerate	Crohn's disease of colon	Inverse variance weighted (fixed effects)	0.793943	4.68655	0.134501	0.798932	0.0552902
40	Glycerate	Crohn's disease of colon	Weighted median	0.778904	9.54967	0.06353	0.845081	0.0560945
40	Glycerate	Crohn's disease of colon	Weighted mode	0.614097	19.8527	0.0189956	0.788954	0.0687325
40	Glycerate	Crohn's disease of colon	MR RAPS	0.780815	4.91973	0.123924	0.792199	0.055989
41	Guanosine	Crohn's disease of colon	Inverse variance weighted (multiplicative random effects)	0.82284	1.53556	0.440924	0.540148	0.092111
41	Guanosine	Crohn's disease of colon	MR Egger	2.26158	13.9637	0.366288	0.347072	0.989223
41	Guanosine	Crohn's disease of colon	Inverse variance weighted (fixed effects)	0.82284	1.39513	0.485307	0.469146	0.092111
41	Guanosine	Crohn's disease of colon	Weighted median	0.845248	1.80777	0.395208	0.664678	0.0819758
41	Guanosine	Crohn's disease of colon	Weighted mode	1.02343	2.81738	0.371765	0.965053	0.0507193
41	Guanosine	Crohn's disease of colon	MR RAPS	0.813746	1.41328	0.468543	0.464289	0.0966409
42	N-acetylalanine	Crohn's disease of colon	MR RAPS	0.0314576	6011.24	1.65e-07	0.577164	0.0538316
44	Ursodeoxycholate	Crohn's disease of colon	Inverse variance weighted (multiplicative random effects)	1.31643	2.12911	0.813955	0.262372	0.173251
44	Ursodeoxycholate	Crohn's disease of colon	MR Egger	1.36161	3.53646	0.524248	0.480105	0.211978
44	Ursodeoxycholate	Crohn's disease of colon	Inverse variance weighted (fixed effects)	1.31643	2.09647	0.826626	0.24686	0.173251
44	Ursodeoxycholate	Crohn's disease of colon	Weighted median	1.20108	2.30283	0.626444	0.581149	0.0986745
44	Ursodeoxycholate	Crohn's disease of colon	Weighted mode	1.28574	2.31385	0.714443	0.426164	0.149955
44	Ursodeoxycholate	Crohn's disease of colon	MR RAPS	1.32484	2.17133	0.808358	0.264437	0.180064
45	Arginine	Crohn's disease of colon	Inverse variance weighted (multiplicative random effects)	2.51019	6.48195	0.972089	0.0572347	0.595947
45	Arginine	Crohn's disease of colon	MR Egger	1.56579	164.567	0.0148978	0.841518	0.130907
45	Arginine	Crohn's disease of colon	Inverse variance weighted (fixed effects)	2.51019	10.1171	0.62281	0.195608	0.595947
45	Arginine	Crohn's disease of colon	Weighted median	1.92361	12.1644	0.30419	0.486903	0.270255
45	Arginine	Crohn's disease of colon	Weighted mode	1.46431	27.2506	0.0786846	0.801271	0.103987
45	Arginine	Crohn's disease of colon	MR RAPS	2.56184	11.3676	0.577342	0.215929	0.624936
46	Ascorbate (Vitamin C)	Crohn's disease of colon	Inverse variance weighted (multiplicative random effects)	0.882258	1.30171	0.597966	0.527868	0.11379
46	Ascorbate (Vitamin C)	Crohn's disease of colon	MR Egger	1.25859	3.77291	0.419848	0.654599	0.363916
46	Ascorbate (Vitamin C)	Crohn's disease of colon	Inverse variance weighted (fixed effects)	0.882258	1.2435	0.625959	0.474353	0.11379
46	Ascorbate (Vitamin C)	Crohn's disease of colon	Weighted median	1.03241	1.72415	0.618197	0.902985	0.0546932
46	Ascorbate (Vitamin C)	Crohn's disease of colon	Weighted mode	1.08043	1.80722	0.645921	0.77369	0.079278
46	Ascorbate (Vitamin C)	Crohn's disease of colon	MR RAPS	0.876622	1.25883	0.61046	0.475703	0.12021
47	Heptanoate (7:0)	Crohn's disease of colon	Inverse variance weighted (multiplicative random effects)	21.7945	425.078	1.11744	0.0420257	1
47	Heptanoate (7:0)	Crohn's disease of colon	Inverse variance weighted (fixed effects)	21.7945	3110.54	0.152707	0.223401	1
47	Heptanoate (7:0)	Crohn's disease of colon	MR RAPS	22.1744	4214.91	0.116658	0.247068	1
48	Laurate (12:0)	Crohn's disease of colon	Inverse variance weighted (multiplicative random effects)	0.0361699	0.279957	0.00467308	0.00147598	0.0653675
48	Laurate (12:0)	Crohn's disease of colon	Inverse variance weighted (fixed effects)	0.0361699	5.5538	0.000235561	0.196197	0.0653675
48	Laurate (12:0)	Crohn's disease of colon	MR RAPS	0.0358462	7.59072	0.000169279	0.223156	0.065378
49	Valine	Crohn's disease of colon	MR RAPS	124.554	1.20162e+06	0.0129107	0.302661	1
50	Urea	Crohn's disease of colon	Inverse variance weighted (multiplicative random effects)	1.83391	14.2069	0.236732	0.561512	0.134458
50	Urea	Crohn's disease of colon	MR Egger	112.276	110297	0.11429	0.158105	1
50	Urea	Crohn's disease of colon	Inverse variance weighted (fixed effects)	1.83391	13.3295	0.252313	0.549003	0.134458
50	Urea	Crohn's disease of colon	Weighted median	2.57775	38.4825	0.17267	0.492363	0.357847
50	Urea	Crohn's disease of colon	Weighted mode	6.05459	187.793	0.195204	0.334166	0.999578
50	Urea	Crohn's disease of colon	MR RAPS	1.89052	15.0132	0.238063	0.546903	0.146653
51	Cortisol	Crohn's disease of colon	Inverse variance weighted (multiplicative random effects)	4.08918	17.2257	0.970725	0.0549206	0.999638
51	Cortisol	Crohn's disease of colon	MR Egger	0.655315	21.7002	0.0197896	0.791644	0.0911025
51	Cortisol	Crohn's disease of colon	Inverse variance weighted (fixed effects)	4.08918	14.2324	1.17488	0.0268781	0.999638
51	Cortisol	Crohn's disease of colon	Weighted median	6.70007	47.3065	0.948938	0.0564635	1
51	Cortisol	Crohn's disease of colon	Weighted mode	17.6729	580.564	0.537981	0.141412	1
51	Cortisol	Crohn's disease of colon	MR RAPS	4.48305	16.6866	1.20442	0.0252618	0.999978
52	Cortisone	Crohn's disease of colon	MR RAPS	58.0106	115233	0.0292037	0.294625	1
53	Proline	Crohn's disease of colon	MR RAPS	2.4858	22.335	0.27666	0.416277	0.260093
54	Citrulline	Crohn's disease of colon	Inverse variance weighted (multiplicative random effects)	0.355558	0.731161	0.172905	0.00493462	0.0597668
54	Citrulline	Crohn's disease of colon	MR Egger	4.61e-08	4.03e+228	5.28e-244	0.915336	0.0738311
54	Citrulline	Crohn's disease of colon	Inverse variance weighted (fixed effects)	0.355558	27.2463	0.00463995	0.640423	0.0597668
54	Citrulline	Crohn's disease of colon	Weighted median	0.302658	55.9486	0.00163725	0.653583	0.0614559
54	Citrulline	Crohn's disease of colon	Weighted mode	0.26286	64.7189	0.00106762	0.681234	0.0628182
54	Citrulline	Crohn's disease of colon	MR RAPS	0.355344	33.9707	0.00371701	0.656529	0.0597734
55	Biliverdin	Crohn's disease of colon	MR RAPS	0.869148	1.64143	0.460218	0.665508	0.0679568
56	Serotonin (5HT)	Crohn's disease of colon	Inverse variance weighted (multiplicative random effects)	0.506507	1.41457	0.181363	0.194245	0.154927
56	Serotonin (5HT)	Crohn's disease of colon	MR Egger	0.107361	0.582691	0.0197813	0.0146175	0.397173
56	Serotonin (5HT)	Crohn's disease of colon	Inverse variance weighted (fixed effects)	0.506507	1.18311	0.216844	0.11606	0.154927
56	Serotonin (5HT)	Crohn's disease of colon	Weighted median	0.371586	1.26607	0.109059	0.113465	0.222542
56	Serotonin (5HT)	Crohn's disease of colon	Weighted mode	0.278918	0.960805	0.0809689	0.0640975	0.278231
56	Serotonin (5HT)	Crohn's disease of colon	MR RAPS	0.492909	1.18646	0.204776	0.114451	0.160976
57	Gamma-glutamylglutamine	Crohn's disease of colon	Inverse variance weighted (multiplicative random effects)	2.26331	9.29004	0.551407	0.256898	0.115826
57	Gamma-glutamylglutamine	Crohn's disease of colon	Inverse variance weighted (fixed effects)	2.26331	65.1627	0.0786123	0.633735	0.115826
57	Gamma-glutamylglutamine	Crohn's disease of colon	MR RAPS	2.26632	71.5533	0.0717815	0.642289	0.116148
58	Gamma-glutamyltyrosine	Crohn's disease of colon	Inverse variance weighted (multiplicative random effects)	0.680891	16.0334	0.0289154	0.811517	0.0517939
58	Gamma-glutamyltyrosine	Crohn's disease of colon	Inverse variance weighted (fixed effects)	0.680891	92.6889	0.00500182	0.87815	0.0517939
58	Gamma-glutamyltyrosine	Crohn's disease of colon	MR RAPS	0.679178	116.283	0.00396691	0.882785	0.0518133
59	Hypoxanthine	Crohn's disease of colon	MR RAPS	0.222107	7.88794	0.00625407	0.408765	0.0716227
60	Betaine	Crohn's disease of colon	Inverse variance weighted (multiplicative random effects)	3.029	76.9556	0.119223	0.501934	0.323585
60	Betaine	Crohn's disease of colon	Inverse variance weighted (fixed effects)	3.029	45.8286	0.200199	0.423968	0.323585
60	Betaine	Crohn's disease of colon	MR RAPS	3.06117	49.182	0.190532	0.429691	0.332237
61	Xanthine	Crohn's disease of colon	Inverse variance weighted (multiplicative random effects)	0.79545	84.5727	0.00748162	0.923425	0.0527736
61	Xanthine	Crohn's disease of colon	MR Egger	2.6006	1.79e+16	3.78e-16	0.928516	0.228484
61	Xanthine	Crohn's disease of colon	Inverse variance weighted (fixed effects)	0.79545	18.6251	0.0339724	0.886889	0.0527736
61	Xanthine	Crohn's disease of colon	Weighted median	2.15806	118.475	0.0393098	0.706623	0.141787
61	Xanthine	Crohn's disease of colon	Weighted mode	3.08157	200.949	0.047256	0.650219	0.352574
61	Xanthine	Crohn's disease of colon	MR RAPS	0.787377	21.3597	0.0290248	0.887114	0.0529975
62	Phosphate	Crohn's disease of colon	Inverse variance weighted (multiplicative random effects)	0.808608	22.5325	0.0290179	0.900414	0.0518421
62	Phosphate	Crohn's disease of colon	MR Egger	23.9918	549021	0.00104842	0.419795	1
62	Phosphate	Crohn's disease of colon	Inverse variance weighted (fixed effects)	0.808608	17.1109	0.0382122	0.891487	0.0518421
62	Phosphate	Crohn's disease of colon	Weighted median	2.04719	92.1093	0.0455002	0.712191	0.106289
62	Phosphate	Crohn's disease of colon	Weighted mode	2.42913	125.613	0.0469749	0.689138	0.156616
62	Phosphate	Crohn's disease of colon	MR RAPS	0.804824	20.7553	0.0312085	0.895815	0.0519158
63	3-methoxytyrosine	Crohn's disease of colon	Inverse variance weighted (multiplicative random effects)	1.11118	3.12419	0.395213	0.841573	0.0532737
63	3-methoxytyrosine	Crohn's disease of colon	MR Egger	0.903527	76.9669	0.0106066	0.961229	0.0524681
63	3-methoxytyrosine	Crohn's disease of colon	Inverse variance weighted (fixed effects)	1.11118	3.98483	0.309856	0.871464	0.0532737
63	3-methoxytyrosine	Crohn's disease of colon	Weighted median	1.17713	6.96869	0.198837	0.857359	0.0583297
63	3-methoxytyrosine	Crohn's disease of colon	Weighted mode	0.577795	6.09442	0.0547792	0.656284	0.0985566
63	3-methoxytyrosine	Crohn's disease of colon	MR RAPS	1.11442	4.31127	0.288066	0.875287	0.0534675
64	Pelargonate (9:0)	Crohn's disease of colon	MR RAPS	0.0269964	140.406	5.19e-06	0.408017	0.05796
65	Undecanoate (11:0)	Crohn's disease of colon	Inverse variance weighted (multiplicative random effects)	3.62272	24.1154	0.544219	0.18321	0.778614
65	Undecanoate (11:0)	Crohn's disease of colon	MR Egger	0.192511	17.0865	0.00216899	0.450923	0.134129
65	Undecanoate (11:0)	Crohn's disease of colon	Inverse variance weighted (fixed effects)	3.62272	27.4824	0.477546	0.213097	0.778614
65	Undecanoate (11:0)	Crohn's disease of colon	Weighted median	1.49181	24.2149	0.0919064	0.778478	0.0801543
65	Undecanoate (11:0)	Crohn's disease of colon	Weighted mode	0.806372	26.7226	0.0243328	0.905427	0.0546342
65	Undecanoate (11:0)	Crohn's disease of colon	MR RAPS	3.83174	32.6202	0.450095	0.218921	0.838794
67	Taurodeoxycholate	Crohn's disease of colon	Inverse variance weighted (multiplicative random effects)	1.2653	1.83779	0.871144	0.216597	0.22468
67	Taurodeoxycholate	Crohn's disease of colon	MR Egger	0.627916	3.37289	0.116896	0.548638	0.393403
67	Taurodeoxycholate	Crohn's disease of colon	Inverse variance weighted (fixed effects)	1.2653	1.99551	0.802292	0.311384	0.22468
67	Taurodeoxycholate	Crohn's disease of colon	Weighted median	1.31268	2.37713	0.724882	0.369172	0.293304
67	Taurodeoxycholate	Crohn's disease of colon	Weighted mode	1.45072	3.5969	0.585109	0.442604	0.531557
67	Taurodeoxycholate	Crohn's disease of colon	MR RAPS	1.27602	2.06924	0.786868	0.323051	0.23932
68	Glycerol	Crohn's disease of colon	Inverse variance weighted (multiplicative random effects)	3.00615	10.1112	0.893757	0.0753208	0.811495
68	Glycerol	Crohn's disease of colon	MR Egger	0.59045	5.33181	0.0653871	0.614385	0.0895845
68	Glycerol	Crohn's disease of colon	Inverse variance weighted (fixed effects)	3.00615	8.90951	1.0143	0.0470762	0.811495
68	Glycerol	Crohn's disease of colon	Weighted median	2.05839	9.35602	0.452861	0.350029	0.321926
68	Glycerol	Crohn's disease of colon	Weighted mode	1.71951	7.18294	0.411629	0.470636	0.1745
68	Glycerol	Crohn's disease of colon	MR RAPS	3.23377	10.7508	0.972696	0.0555137	0.886768
69	Kynurenine	Crohn's disease of colon	Inverse variance weighted (multiplicative random effects)	10.8789	84.0836	1.40754	0.0221588	1
69	Kynurenine	Crohn's disease of colon	MR Egger	45.2965	7.33465e+08	2.8e-06	0.503724	1
69	Kynurenine	Crohn's disease of colon	Inverse variance weighted (fixed effects)	10.8789	132.768	0.891408	0.061492	1
69	Kynurenine	Crohn's disease of colon	Weighted median	13.4004	197.56	0.908948	0.0586965	1
69	Kynurenine	Crohn's disease of colon	Weighted mode	14.7703	361.8	0.602991	0.240724	1
69	Kynurenine	Crohn's disease of colon	MR RAPS	11.0015	143.071	0.845967	0.0669224	1
70	Mannitol	Crohn's disease of colon	Inverse variance weighted (multiplicative random effects)	0.977482	1.62669	0.587372	0.930157	0.0514711
70	Mannitol	Crohn's disease of colon	MR Egger	0.272267	1.27434	0.0581706	0.0930804	0.956946
70	Mannitol	Crohn's disease of colon	Inverse variance weighted (fixed effects)	0.977482	1.46804	0.65085	0.912597	0.0514711
70	Mannitol	Crohn's disease of colon	Weighted median	0.924253	1.61757	0.528103	0.782667	0.0667999
70	Mannitol	Crohn's disease of colon	Weighted mode	0.838391	1.69509	0.414668	0.634194	0.128569
70	Mannitol	Crohn's disease of colon	MR RAPS	0.975974	1.48882	0.639785	0.910131	0.0516749
71	Glycerol 3-phosphate (G3P)	Crohn's disease of colon	Inverse variance weighted (multiplicative random effects)	0.741364	6.19236	0.0887577	0.782286	0.0583658
71	Glycerol 3-phosphate (G3P)	Crohn's disease of colon	MR Egger	0.126362	30.3847	0.000525506	0.4131	0.149915
71	Glycerol 3-phosphate (G3P)	Crohn's disease of colon	Inverse variance weighted (fixed effects)	0.741364	4.82746	0.113853	0.75423	0.0583658
71	Glycerol 3-phosphate (G3P)	Crohn's disease of colon	Weighted median	0.255984	3.60019	0.0182012	0.312366	0.121694
71	Glycerol 3-phosphate (G3P)	Crohn's disease of colon	Weighted mode	0.157267	2.4402	0.0101357	0.222618	0.142739
71	Glycerol 3-phosphate (G3P)	Crohn's disease of colon	MR RAPS	0.729495	5.12232	0.103891	0.751106	0.0591565
73	Carnitine	Crohn's disease of colon	Inverse variance weighted (multiplicative random effects)	10.5063	145.667	0.757765	0.0795623	1
73	Carnitine	Crohn's disease of colon	MR Egger	25.4107	10507.4	0.0614524	0.271582	1
73	Carnitine	Crohn's disease of colon	Inverse variance weighted (fixed effects)	10.5063	140.344	0.786505	0.0753366	1
73	Carnitine	Crohn's disease of colon	Weighted median	16.8665	743.496	0.382623	0.143563	1
73	Carnitine	Crohn's disease of colon	Weighted mode	16.8968	1097.05	0.260245	0.204104	1
73	Carnitine	Crohn's disease of colon	MR RAPS	10.9281	153.499	0.778012	0.076095	1
74	Choline	Crohn's disease of colon	Inverse variance weighted (multiplicative random effects)	2.31671	24.5563	0.218565	0.485485	0.15553
74	Choline	Crohn's disease of colon	MR Egger	1570.75	4.32217e+06	0.57084	0.0676387	1
74	Choline	Crohn's disease of colon	Inverse variance weighted (fixed effects)	2.31671	31.3725	0.171078	0.527428	0.15553
74	Choline	Crohn's disease of colon	Weighted median	2.4945	97.9287	0.0635414	0.625438	0.186968
74	Choline	Crohn's disease of colon	Weighted mode	58.598	25708.1	0.133566	0.209431	1
74	Choline	Crohn's disease of colon	MR RAPS	2.38319	36.8588	0.154091	0.534253	0.166795
75	N-acetylornithine	Crohn's disease of colon	MR RAPS	1.11263	1.8853	0.656631	0.691617	0.0710001
76	N1-methyladenosine	Crohn's disease of colon	MR RAPS	1.35214	934303	1.96e-06	0.964923	0.0504179
77	3-methyl-2-oxovalerate	Crohn's disease of colon	Inverse variance weighted (multiplicative random effects)	3.44072	173.903	0.0680756	0.536973	0.229633
77	3-methyl-2-oxovalerate	Crohn's disease of colon	Inverse variance weighted (fixed effects)	3.44072	188.663	0.0627499	0.545287	0.229633
77	3-methyl-2-oxovalerate	Crohn's disease of colon	MR RAPS	3.49137	216.662	0.0562612	0.552752	0.237415
78	3-methylhistidine	Crohn's disease of colon	Inverse variance weighted (multiplicative random effects)	1.091	1.79729	0.662271	0.73236	0.0620417
78	3-methylhistidine	Crohn's disease of colon	MR Egger	1.8373	11.7677	0.28686	0.459216	0.843136
78	3-methylhistidine	Crohn's disease of colon	Inverse variance weighted (fixed effects)	1.091	1.94453	0.612123	0.767694	0.0620417
78	3-methylhistidine	Crohn's disease of colon	Weighted median	1.0893	2.28364	0.519594	0.820834	0.0615914
78	3-methylhistidine	Crohn's disease of colon	Weighted mode	1.10231	2.5773	0.471459	0.829601	0.0652456
78	3-methylhistidine	Crohn's disease of colon	MR RAPS	1.09292	2.02355	0.590281	0.777409	0.0625561
79	3-phenylpropionate (hydrocinnamate)	Crohn's disease of colon	MR RAPS	0.191937	2.75741	0.0133603	0.224749	0.0955404
80	Phenylacetate	Crohn's disease of colon	Inverse variance weighted (multiplicative random effects)	1.67641	3.9221	0.71654	0.233505	0.234777
80	Phenylacetate	Crohn's disease of colon	MR Egger	2.30099	10.1089	0.523756	0.231413	0.660674
80	Phenylacetate	Crohn's disease of colon	Inverse variance weighted (fixed effects)	1.67641	3.86941	0.726298	0.226032	0.234777
80	Phenylacetate	Crohn's disease of colon	Weighted median	1.98558	5.54262	0.711315	0.190326	0.435875
80	Phenylacetate	Crohn's disease of colon	Weighted mode	2.20867	5.77707	0.844411	0.150288	0.597013
80	Phenylacetate	Crohn's disease of colon	MR RAPS	1.67804	4.04706	0.695768	0.24915	0.235683
81	Glycerophosphorylcholine (GPC)	Crohn's disease of colon	Inverse variance weighted (multiplicative random effects)	0.548567	1.09157	0.275682	0.0871877	0.141338
81	Glycerophosphorylcholine (GPC)	Crohn's disease of colon	MR Egger	0.399757	1.11663	0.143115	0.0778707	0.214228
81	Glycerophosphorylcholine (GPC)	Crohn's disease of colon	Inverse variance weighted (fixed effects)	0.548567	1.0609	0.28365	0.0743733	0.141338
81	Glycerophosphorylcholine (GPC)	Crohn's disease of colon	Weighted median	0.458052	1.14005	0.184037	0.093296	0.183118
81	Glycerophosphorylcholine (GPC)	Crohn's disease of colon	Weighted mode	0.444487	1.05637	0.187026	0.086282	0.190069
81	Glycerophosphorylcholine (GPC)	Crohn's disease of colon	MR RAPS	0.548036	1.10752	0.271186	0.093836	0.14156
82	Aspartate	Crohn's disease of colon	Inverse variance weighted (multiplicative random effects)	1.04754	3.96738	0.276593	0.945495	0.0501809
82	Aspartate	Crohn's disease of colon	MR Egger	0.0894888	21487345740	3.73e-13	0.75979	0.119393
82	Aspartate	Crohn's disease of colon	Inverse variance weighted (fixed effects)	1.04754	10.0105	0.10962	0.967828	0.0501809
82	Aspartate	Crohn's disease of colon	Weighted median	1.66749	26.9729	0.103086	0.718814	0.0862295
82	Aspartate	Crohn's disease of colon	Weighted mode	2.0019	56.0449	0.071507	0.722627	0.133062
82	Aspartate	Crohn's disease of colon	MR RAPS	1.04807	11.6301	0.0944492	0.969497	0.050185
83	X-04499--3,4-dihydroxybutyrate	Crohn's disease of colon	MR RAPS	6.45436	550.346	0.0756956	0.411015	0.78792
84	Dihomo-linoleate (20:2n6)	Crohn's disease of colon	Inverse variance weighted (multiplicative random effects)	3.40397	21.6029	0.536363	0.193855	0.94007
84	Dihomo-linoleate (20:2n6)	Crohn's disease of colon	MR Egger	4.06462	6907.25	0.00239186	0.676824	0.994518
84	Dihomo-linoleate (20:2n6)	Crohn's disease of colon	Inverse variance weighted (fixed effects)	3.40397	13.9734	0.829215	0.0891154	0.94007
84	Dihomo-linoleate (20:2n6)	Crohn's disease of colon	Weighted median	9.06215	67.3746	1.21889	0.0312881	1
84	Dihomo-linoleate (20:2n6)	Crohn's disease of colon	Weighted mode	10.9875	113.872	1.06018	0.0794031	1
84	Dihomo-linoleate (20:2n6)	Crohn's disease of colon	MR RAPS	3.59602	15.7643	0.820295	0.0896412	0.967185
85	2-hydroxystearate	Crohn's disease of colon	Inverse variance weighted (multiplicative random effects)	1.34537	4.16734	0.434334	0.607044	0.0766188
85	2-hydroxystearate	Crohn's disease of colon	MR Egger	0.711288	5.91342	0.0855562	0.744884	0.0686258
85	2-hydroxystearate	Crohn's disease of colon	Inverse variance weighted (fixed effects)	1.34537	4.34534	0.416542	0.61993	0.0766188
85	2-hydroxystearate	Crohn's disease of colon	Weighted median	0.595969	3.65295	0.0972307	0.575821	0.086856
85	2-hydroxystearate	Crohn's disease of colon	Weighted mode	0.67742	4.12689	0.111197	0.675714	0.0733176
85	2-hydroxystearate	Crohn's disease of colon	MR RAPS	1.36278	4.67954	0.39687	0.622888	0.0794078
86	Indolelactate	Crohn's disease of colon	MR RAPS	1.94589	184.585	0.0205135	0.774403	0.074344
87	Glycylvaline	Crohn's disease of colon	Inverse variance weighted (multiplicative random effects)	1.26762	2.60225	0.61749	0.518124	0.103278
87	Glycylvaline	Crohn's disease of colon	MR Egger	9.50783	5391.21	0.0167678	0.412861	1
87	Glycylvaline	Crohn's disease of colon	Inverse variance weighted (fixed effects)	1.26762	2.80279	0.573309	0.558026	0.103278
87	Glycylvaline	Crohn's disease of colon	Weighted median	1.5729	4.53753	0.545236	0.402082	0.301705
87	Glycylvaline	Crohn's disease of colon	Weighted mode	1.53237	6.15063	0.381775	0.573458	0.267388
87	Glycylvaline	Crohn's disease of colon	MR RAPS	1.27809	2.96904	0.550185	0.568286	0.107624
88	Gamma-glutamylleucine	Crohn's disease of colon	Inverse variance weighted (multiplicative random effects)	1.20047	3.94735	0.36509	0.763521	0.060644
88	Gamma-glutamylleucine	Crohn's disease of colon	MR Egger	0.118251	2.30569	0.00606473	0.152895	0.269791
88	Gamma-glutamylleucine	Crohn's disease of colon	Inverse variance weighted (fixed effects)	1.20047	4.57284	0.315151	0.788875	0.060644
88	Gamma-glutamylleucine	Crohn's disease of colon	Weighted median	1.16667	8.86543	0.153532	0.881564	0.0573453
88	Gamma-glutamylleucine	Crohn's disease of colon	Weighted mode	0.200218	3.9632	0.0101149	0.299431	0.230167
88	Gamma-glutamylleucine	Crohn's disease of colon	MR RAPS	1.20986	4.94389	0.296074	0.790811	0.0616701
89	Eicosapentaenoate (EPA; 20:5n3)	Crohn's disease of colon	MR RAPS	0.363813	2.86586	0.046185	0.336967	0.0898855
90	Estrone 3-sulfate	Crohn's disease of colon	MR RAPS	0.71909	1.24188	0.416375	0.23684	0.151718
91	Glycocholate	Crohn's disease of colon	Inverse variance weighted (multiplicative random effects)	1.06324	1.95458	0.578374	0.843517	0.0540885
91	Glycocholate	Crohn's disease of colon	MR Egger	0.356881	1.72902	0.0736626	0.17352	0.486742
91	Glycocholate	Crohn's disease of colon	Inverse variance weighted (fixed effects)	1.06324	2.11311	0.534983	0.861093	0.0540885
91	Glycocholate	Crohn's disease of colon	Weighted median	0.766536	1.86407	0.315212	0.557594	0.107342
91	Glycocholate	Crohn's disease of colon	Weighted mode	0.802358	1.86287	0.345584	0.624147	0.0907975
91	Glycocholate	Crohn's disease of colon	MR RAPS	1.06608	2.20289	0.515929	0.8628	0.0544654
92	Glycodeoxycholate	Crohn's disease of colon	Inverse variance weighted (multiplicative random effects)	1.07959	1.61757	0.720538	0.710463	0.067428
92	Glycodeoxycholate	Crohn's disease of colon	MR Egger	0.277346	3.30466	0.0232766	0.254137	0.942978
92	Glycodeoxycholate	Crohn's disease of colon	Inverse variance weighted (fixed effects)	1.07959	1.61859	0.720084	0.710894	0.067428
92	Glycodeoxycholate	Crohn's disease of colon	Weighted median	1.06418	1.80558	0.627207	0.817624	0.061294
92	Glycodeoxycholate	Crohn's disease of colon	Weighted mode	1.25301	2.48155	0.632679	0.546201	0.23431
92	Glycodeoxycholate	Crohn's disease of colon	MR RAPS	1.08219	1.65868	0.706068	0.716944	0.0685962
93	Taurochenodeoxycholate	Crohn's disease of colon	Inverse variance weighted (multiplicative random effects)	0.870674	1.37574	0.551028	0.552965	0.0841433
93	Taurochenodeoxycholate	Crohn's disease of colon	MR Egger	0.884072	2.17259	0.359747	0.76705	0.0773421
93	Taurochenodeoxycholate	Crohn's disease of colon	Inverse variance weighted (fixed effects)	0.870674	1.36214	0.556533	0.544181	0.0841433
93	Taurochenodeoxycholate	Crohn's disease of colon	Weighted median	1.02217	1.85468	0.563343	0.942505	0.050984
93	Taurochenodeoxycholate	Crohn's disease of colon	Weighted mode	1.08758	2.0994	0.563419	0.807491	0.0654832
93	Taurochenodeoxycholate	Crohn's disease of colon	MR RAPS	0.863715	1.38162	0.53995	0.541008	0.0879867
94	Taurocholate	Crohn's disease of colon	Inverse variance weighted (multiplicative random effects)	0.929155	1.46408	0.589671	0.751448	0.0720078
94	Taurocholate	Crohn's disease of colon	MR Egger	0.7635	1.85438	0.314354	0.523624	0.307254
94	Taurocholate	Crohn's disease of colon	Inverse variance weighted (fixed effects)	0.929155	1.33649	0.645969	0.691973	0.0720078
94	Taurocholate	Crohn's disease of colon	Weighted median	0.763501	1.31668	0.442731	0.331786	0.307253
94	Taurocholate	Crohn's disease of colon	Weighted mode	0.695109	1.18633	0.407288	0.205259	0.467004
94	Taurocholate	Crohn's disease of colon	MR RAPS	0.925694	1.3514	0.63409	0.689169	0.0742389
96	1-stearoylglycerophosphoinositol	Crohn's disease of colon	Inverse variance weighted (multiplicative random effects)	1.06235	4.19334	0.269139	0.931192	0.051179
96	1-stearoylglycerophosphoinositol	Crohn's disease of colon	MR Egger	0.405885	70.4373	0.00233885	0.633823	0.162752
96	1-stearoylglycerophosphoinositol	Crohn's disease of colon	Inverse variance weighted (fixed effects)	1.06235	3.10521	0.363452	0.91199	0.051179
96	1-stearoylglycerophosphoinositol	Crohn's disease of colon	Weighted median	1.61288	6.27487	0.414569	0.490413	0.168903
96	1-stearoylglycerophosphoinositol	Crohn's disease of colon	Weighted mode	1.91884	7.20794	0.510819	0.405654	0.320044
96	1-stearoylglycerophosphoinositol	Crohn's disease of colon	MR RAPS	1.06486	3.28359	0.345335	0.912894	0.051276
97	Myo-inositol	Crohn's disease of colon	Inverse variance weighted (multiplicative random effects)	12.0011	1139.38	0.126407	0.284756	1
97	Myo-inositol	Crohn's disease of colon	Inverse variance weighted (fixed effects)	12.0011	562.777	0.255919	0.205591	1
97	Myo-inositol	Crohn's disease of colon	MR RAPS	12.4172	655.504	0.23522	0.213193	1
98	Glucose	Crohn's disease of colon	MR RAPS	0.00811181	29.5587	2.23e-06	0.249875	0.0571729
99	1,5-anhydroglucitol (1,5-AG)	Crohn's disease of colon	Inverse variance weighted (multiplicative random effects)	3.26807	25.9963	0.410839	0.263037	0.794681
99	1,5-anhydroglucitol (1,5-AG)	Crohn's disease of colon	MR Egger	120.019	1.58347e+07	0.00090968	0.330938	1
99	1,5-anhydroglucitol (1,5-AG)	Crohn's disease of colon	Inverse variance weighted (fixed effects)	3.26807	15.672	0.681487	0.138725	0.794681
99	1,5-anhydroglucitol (1,5-AG)	Crohn's disease of colon	Weighted median	4.65006	24.2779	0.890648	0.0683549	0.994941
99	1,5-anhydroglucitol (1,5-AG)	Crohn's disease of colon	Weighted mode	4.95926	28.7852	0.854406	0.216249	0.998533
99	1,5-anhydroglucitol (1,5-AG)	Crohn's disease of colon	MR RAPS	3.30853	16.1997	0.675715	0.139852	0.808684
100	2-hydroxybutyrate (AHB)	Crohn's disease of colon	Inverse variance weighted (multiplicative random effects)	2.41792	7.94708	0.73566	0.145855	0.675059
100	2-hydroxybutyrate (AHB)	Crohn's disease of colon	MR Egger	2.64098	64.1529	0.108721	0.520807	0.798155
100	2-hydroxybutyrate (AHB)	Crohn's disease of colon	Inverse variance weighted (fixed effects)	2.41792	7.84331	0.745393	0.141406	0.675059
100	2-hydroxybutyrate (AHB)	Crohn's disease of colon	Weighted median	2.53594	13.7784	0.466745	0.281205	0.743912
100	2-hydroxybutyrate (AHB)	Crohn's disease of colon	Weighted mode	6.35017	50.2311	0.802783	0.105296	1
100	2-hydroxybutyrate (AHB)	Crohn's disease of colon	MR RAPS	2.49485	8.61418	0.722562	0.14817	0.720813
101	3-methyl-2-oxobutyrate	Crohn's disease of colon	MR RAPS	24.6139	11991.8	0.0505216	0.310337	1
102	1,6-anhydroglucose	Crohn's disease of colon	MR RAPS	0.867784	6.4702	0.116387	0.889962	0.0521957
103	1-palmitoylglycerol (1-monopalmitin)	Crohn's disease of colon	Inverse variance weighted (multiplicative random effects)	0.287447	0.726237	0.113772	0.00837775	0.166431
103	1-palmitoylglycerol (1-monopalmitin)	Crohn's disease of colon	MR Egger	0.219565	35.1425	0.0013718	0.522378	0.190495
103	1-palmitoylglycerol (1-monopalmitin)	Crohn's disease of colon	Inverse variance weighted (fixed effects)	0.287447	1.24451	0.0663921	0.095427	0.166431
103	1-palmitoylglycerol (1-monopalmitin)	Crohn's disease of colon	Weighted median	0.297147	2.2537	0.0391785	0.240421	0.16318
103	1-palmitoylglycerol (1-monopalmitin)	Crohn's disease of colon	Weighted mode	0.324423	2.81553	0.0373821	0.331288	0.154295
103	1-palmitoylglycerol (1-monopalmitin)	Crohn's disease of colon	MR RAPS	0.282155	1.37965	0.0577039	0.118157	0.168224
106	2-hydroxyisobutyrate	Crohn's disease of colon	Inverse variance weighted (multiplicative random effects)	1.82309	9.9459	0.334174	0.487835	0.110575
106	2-hydroxyisobutyrate	Crohn's disease of colon	MR Egger	27.4169	1.7792e+06	0.000422486	0.420824	1
106	2-hydroxyisobutyrate	Crohn's disease of colon	Inverse variance weighted (fixed effects)	1.82309	14.3396	0.231782	0.568209	0.110575
106	2-hydroxyisobutyrate	Crohn's disease of colon	Weighted median	1.58517	15.522	0.161885	0.692279	0.0802402
106	2-hydroxyisobutyrate	Crohn's disease of colon	Weighted mode	4.46236	54.9168	0.362597	0.363245	0.863
106	2-hydroxyisobutyrate	Crohn's disease of colon	MR RAPS	1.83263	15.2293	0.220531	0.574999	0.112021
107	4-methyl-2-oxopentanoate	Crohn's disease of colon	Inverse variance weighted (multiplicative random effects)	89.4856	10296.4	0.777713	0.0634298	1
107	4-methyl-2-oxopentanoate	Crohn's disease of colon	Inverse variance weighted (fixed effects)	89.4856	5417.9	1.478	0.0318239	1
107	4-methyl-2-oxopentanoate	Crohn's disease of colon	MR RAPS	99.1098	8121.69	1.20945	0.040895	1
108	Phenyllactate (PLA)	Crohn's disease of colon	MR RAPS	0.525585	21.5296	0.0128307	0.734171	0.0594932
109	Homocitrulline	Crohn's disease of colon	MR RAPS	0.46117	4.90321	0.0433753	0.521036	0.0767869
110	Aspartylphenylalanine	Crohn's disease of colon	MR RAPS	0.479116	2.34911	0.0977188	0.36434	0.102159
111	Levulinate (4-oxovalerate)	Crohn's disease of colon	Inverse variance weighted (multiplicative random effects)	27.754	56.4625	13.6424	4.65e-20	1
111	Levulinate (4-oxovalerate)	Crohn's disease of colon	Inverse variance weighted (fixed effects)	27.754	3123.87	0.24658	0.167882	1
111	Levulinate (4-oxovalerate)	Crohn's disease of colon	MR RAPS	27.7388	4050.62	0.189956	0.191286	1
113	Cholate	Crohn's disease of colon	Inverse variance weighted (multiplicative random effects)	0.856541	1.40397	0.522563	0.539083	0.109763
113	Cholate	Crohn's disease of colon	MR Egger	0.713823	2.25959	0.225502	0.52155	0.295336
113	Cholate	Crohn's disease of colon	Inverse variance weighted (fixed effects)	0.856541	1.19764	0.612592	0.365223	0.109763
113	Cholate	Crohn's disease of colon	Weighted median	0.642942	1.09968	0.375903	0.106745	0.426233
113	Cholate	Crohn's disease of colon	Weighted mode	0.583483	1.04151	0.326884	0.10586	0.543786
113	Cholate	Crohn's disease of colon	MR RAPS	0.838004	1.17113	0.599637	0.300692	0.12668
115	Indoleacetate	Crohn's disease of colon	MR RAPS	0.088077	2.5607	0.00302946	0.157626	0.0797913
116	Hyodeoxycholate	Crohn's disease of colon	Inverse variance weighted (multiplicative random effects)	0.976334	1.34077	0.710957	0.882347	0.0517584
116	Hyodeoxycholate	Crohn's disease of colon	MR Egger	0.924232	1.87222	0.456253	0.8154	0.0682013
116	Hyodeoxycholate	Crohn's disease of colon	Inverse variance weighted (fixed effects)	0.976334	1.42711	0.667941	0.901582	0.0517584
116	Hyodeoxycholate	Crohn's disease of colon	Weighted median	0.900003	1.5035	0.538746	0.68738	0.0819304
116	Hyodeoxycholate	Crohn's disease of colon	Weighted mode	0.90439	1.64086	0.498472	0.745486	0.0791498
116	Hyodeoxycholate	Crohn's disease of colon	MR RAPS	0.975795	1.45705	0.653495	0.90465	0.0518395
117	3-indoxyl sulfate	Crohn's disease of colon	Inverse variance weighted (multiplicative random effects)	0.857269	2.46887	0.29767	0.775366	0.0567918
117	3-indoxyl sulfate	Crohn's disease of colon	MR Egger	48518.1	196000000000000	1.2e-05	0.260764	1
117	3-indoxyl sulfate	Crohn's disease of colon	Inverse variance weighted (fixed effects)	0.857269	2.64274	0.278087	0.788612	0.0567918
117	3-indoxyl sulfate	Crohn's disease of colon	Weighted median	0.764308	3.06267	0.190738	0.704293	0.0686601
117	3-indoxyl sulfate	Crohn's disease of colon	Weighted mode	0.467786	3.04945	0.0717584	0.485047	0.148514
117	3-indoxyl sulfate	Crohn's disease of colon	MR RAPS	0.853301	2.81278	0.258862	0.794342	0.0571765
118	N-acetylglycine	Crohn's disease of colon	MR RAPS	7.36269	145.017	0.373813	0.189217	0.997899
119	Bilirubin (Z,Z)	Crohn's disease of colon	MR RAPS	0.909753	1.39699	0.592453	0.66558	0.0683702
121	Erythrose	Crohn's disease of colon	Inverse variance weighted (multiplicative random effects)	0.236525	0.732032	0.076423	0.0123788	0.154464
121	Erythrose	Crohn's disease of colon	MR Egger	0.551226	27.0975	0.0112132	0.714311	0.0850606
121	Erythrose	Crohn's disease of colon	Inverse variance weighted (fixed effects)	0.236525	0.974234	0.0574237	0.0459183	0.154464
121	Erythrose	Crohn's disease of colon	Weighted median	0.305182	1.99485	0.0466884	0.215326	0.135983
121	Erythrose	Crohn's disease of colon	Weighted mode	0.324225	2.59015	0.0405853	0.336674	0.13119
121	Erythrose	Crohn's disease of colon	MR RAPS	0.228549	1.07502	0.0485894	0.0617022	0.156733
122	Threonate	Crohn's disease of colon	Inverse variance weighted (multiplicative random effects)	0.837747	1.39439	0.503316	0.495837	0.0709992
122	Threonate	Crohn's disease of colon	MR Egger	1.05347	2.41493	0.459558	0.896256	0.0522524
122	Threonate	Crohn's disease of colon	Inverse variance weighted (fixed effects)	0.837747	1.42871	0.491228	0.515668	0.0709992
122	Threonate	Crohn's disease of colon	Weighted median	0.961845	2.08718	0.443251	0.921599	0.051147
122	Threonate	Crohn's disease of colon	Weighted mode	0.978191	1.88416	0.507843	0.948204	0.0503745
122	Threonate	Crohn's disease of colon	MR RAPS	0.833998	1.47465	0.471672	0.532466	0.0719929
123	Cysteine	Crohn's disease of colon	Inverse variance weighted (multiplicative random effects)	1.23486	3.22761	0.472451	0.666933	0.0707393
123	Cysteine	Crohn's disease of colon	MR Egger	1.74581	9.08671	0.335419	0.484938	0.268694
123	Cysteine	Crohn's disease of colon	Inverse variance weighted (fixed effects)	1.23486	3.27318	0.465874	0.67144	0.0707393
123	Cysteine	Crohn's disease of colon	Weighted median	1.3513	5.61847	0.325001	0.6788	0.0969416
123	Cysteine	Crohn's disease of colon	Weighted mode	2.47664	11.3322	0.541267	0.259583	0.757234
123	Cysteine	Crohn's disease of colon	MR RAPS	1.24703	3.44599	0.451271	0.670334	0.0729672
124	Pyroglutamylglycine	Crohn's disease of colon	Inverse variance weighted (multiplicative random effects)	0.986362	2.44295	0.398251	0.976325	0.0501102
124	Pyroglutamylglycine	Crohn's disease of colon	MR Egger	0.426275	6892.25	2.64e-05	0.769604	0.258106
124	Pyroglutamylglycine	Crohn's disease of colon	Inverse variance weighted (fixed effects)	0.986362	2.3055	0.421995	0.974711	0.0501102
124	Pyroglutamylglycine	Crohn's disease of colon	Weighted median	0.734731	2.23994	0.241002	0.587816	0.0927464
124	Pyroglutamylglycine	Crohn's disease of colon	Weighted mode	0.570317	2.69572	0.120659	0.552016	0.165072
124	Pyroglutamylglycine	Crohn's disease of colon	MR RAPS	0.985742	2.40911	0.403339	0.974872	0.0501205
126	DSGEGDFXAEGGGVR*	Crohn's disease of colon	Inverse variance weighted (multiplicative random effects)	1.0421	2.51364	0.432035	0.926853	0.0517296
126	DSGEGDFXAEGGGVR*	Crohn's disease of colon	MR Egger	14.5828	645.781	0.329303	0.149659	1
126	DSGEGDFXAEGGGVR*	Crohn's disease of colon	Inverse variance weighted (fixed effects)	1.0421	2.09727	0.517806	0.907988	0.0517296
126	DSGEGDFXAEGGGVR*	Crohn's disease of colon	Weighted median	0.988805	2.85336	0.342661	0.983389	0.0501222
126	DSGEGDFXAEGGGVR*	Crohn's disease of colon	Weighted mode	0.987285	8.26846	0.117886	0.990816	0.0501577
126	DSGEGDFXAEGGGVR*	Crohn's disease of colon	MR RAPS	1.046	2.15008	0.508869	0.902638	0.0520647
127	Pyridoxate	Crohn's disease of colon	Inverse variance weighted (multiplicative random effects)	0.684016	1.56549	0.298871	0.368645	0.0996533
127	Pyridoxate	Crohn's disease of colon	MR Egger	0.511837	2.43753	0.107476	0.363974	0.171426
127	Pyridoxate	Crohn's disease of colon	Inverse variance weighted (fixed effects)	0.684016	1.49455	0.313056	0.34092	0.0996533
127	Pyridoxate	Crohn's disease of colon	Weighted median	0.438874	1.29463	0.148777	0.135663	0.211713
127	Pyridoxate	Crohn's disease of colon	Weighted mode	0.405829	1.21313	0.135762	0.137562	0.231809
127	Pyridoxate	Crohn's disease of colon	MR RAPS	0.676912	1.53395	0.298712	0.349831	0.101965
128	Androsterone sulfate	Crohn's disease of colon	Inverse variance weighted (multiplicative random effects)	1.1483	1.75341	0.752013	0.521976	0.0988219
128	Androsterone sulfate	Crohn's disease of colon	Inverse variance weighted (fixed effects)	1.1483	1.52144	0.866671	0.335436	0.0988219
128	Androsterone sulfate	Crohn's disease of colon	MR RAPS	1.14861	1.52366	0.865884	0.3365	0.0990357
129	3-carboxy-4-methyl-5-propyl-2-furanpropanoate (CMPF)	Crohn's disease of colon	MR RAPS	0.279098	1.40575	0.055412	0.121834	0.165688
130	3-(4-hydroxyphenyl)lactate	Crohn's disease of colon	MR RAPS	0.0399873	2.12453	0.000752631	0.112235	0.0792544
131	Acetylcarnitine	Crohn's disease of colon	MR RAPS	12.0749	404.329	0.360608	0.164339	1
132	Serine	Crohn's disease of colon	Inverse variance weighted (multiplicative random effects)	0.627839	11.4984	0.0342813	0.753701	0.0574167
132	Serine	Crohn's disease of colon	Inverse variance weighted (fixed effects)	0.627839	12.8149	0.0307596	0.762281	0.0574167
132	Serine	Crohn's disease of colon	MR RAPS	0.62614	13.3879	0.029284	0.764457	0.057485
133	Trans-4-hydroxyproline	Crohn's disease of colon	Inverse variance weighted (multiplicative random effects)	0.410855	0.893041	0.189019	0.0247309	0.142598
133	Trans-4-hydroxyproline	Crohn's disease of colon	MR Egger	2.73507	1049.06	0.00713079	0.670702	0.733654
133	Trans-4-hydroxyproline	Crohn's disease of colon	Inverse variance weighted (fixed effects)	0.410855	1.55604	0.108481	0.190457	0.142598
133	Trans-4-hydroxyproline	Crohn's disease of colon	Weighted median	0.43116	2.63214	0.0706265	0.362052	0.136136
133	Trans-4-hydroxyproline	Crohn's disease of colon	Weighted mode	0.390571	2.36309	0.0645534	0.363868	0.149298
133	Trans-4-hydroxyproline	Crohn's disease of colon	MR RAPS	0.40367	1.72712	0.094348	0.221261	0.144944
134	Glutamate	Crohn's disease of colon	Inverse variance weighted (multiplicative random effects)	0.27761	0.562924	0.136906	0.000380652	0.0793919
134	Glutamate	Crohn's disease of colon	Inverse variance weighted (fixed effects)	0.27761	4.63384	0.0166314	0.372221	0.0793919
134	Glutamate	Crohn's disease of colon	MR RAPS	0.277132	5.54546	0.0138495	0.401217	0.0794316
135	Hexanoylcarnitine	Crohn's disease of colon	Inverse variance weighted (multiplicative random effects)	2.80827	7.79157	1.01217	0.0473414	0.929429
135	Hexanoylcarnitine	Crohn's disease of colon	Inverse variance weighted (fixed effects)	2.80827	8.41773	0.936878	0.0652435	0.929429
135	Hexanoylcarnitine	Crohn's disease of colon	MR RAPS	2.81313	8.51146	0.929768	0.0670884	0.930673
137	Alanine	Crohn's disease of colon	MR RAPS	8.22076	22757.6	0.00296961	0.6024	0.581337
138	Glycochenodeoxycholate	Crohn's disease of colon	MR RAPS	1.49719	10.1834	0.220123	0.679892	0.0911041
139	2-aminobutyrate	Crohn's disease of colon	Inverse variance weighted (multiplicative random effects)	0.987988	5.04373	0.193531	0.988407	0.0500063
139	2-aminobutyrate	Crohn's disease of colon	Inverse variance weighted (fixed effects)	0.987988	24.3026	0.0401652	0.994099	0.0500063
139	2-aminobutyrate	Crohn's disease of colon	MR RAPS	0.987964	26.3896	0.036987	0.994235	0.0500063
141	Dodecanedioate	Crohn's disease of colon	MR RAPS	0.171771	4.55552	0.00647684	0.292193	0.087368
142	Gamma-glutamylvaline	Crohn's disease of colon	MR RAPS	0.0844031	55.5865	0.000128158	0.455313	0.0623407
143	Indolepropionate	Crohn's disease of colon	MR RAPS	0.237371	2.21446	0.0254442	0.206866	0.104777
144	Butyrylcarnitine	Crohn's disease of colon	Inverse variance weighted (multiplicative random effects)	1.15844	1.82222	0.736449	0.524547	0.0988751
144	Butyrylcarnitine	Crohn's disease of colon	MR Egger	0.713017	9.59544	0.0529828	0.675082	0.215932
144	Butyrylcarnitine	Crohn's disease of colon	Inverse variance weighted (fixed effects)	1.15844	1.87047	0.717453	0.547411	0.0988751
144	Butyrylcarnitine	Crohn's disease of colon	Weighted median	1.09629	1.80128	0.667215	0.716721	0.0677961
144	Butyrylcarnitine	Crohn's disease of colon	Weighted mode	1.09685	1.86138	0.646342	0.764552	0.0680089
144	Butyrylcarnitine	Crohn's disease of colon	MR RAPS	1.15861	1.87321	0.716623	0.548087	0.0989874
145	Myristoleate (14:1n5)	Crohn's disease of colon	MR RAPS	5.32506	120.227	0.235856	0.29296	0.943625
146	Dehydroisoandrosterone sulfate (DHEA-S)	Crohn's disease of colon	MR RAPS	0.899304	4.09357	0.197565	0.890826	0.0511378
147	Propionylcarnitine	Crohn's disease of colon	Inverse variance weighted (multiplicative random effects)	17.0891	69.2734	4.21572	7.04e-05	1
147	Propionylcarnitine	Crohn's disease of colon	Inverse variance weighted (fixed effects)	17.0891	410.071	0.712162	0.0800078	1
147	Propionylcarnitine	Crohn's disease of colon	MR RAPS	17.1248	445.287	0.658586	0.0874969	1
148	Caproate (6:0)	Crohn's disease of colon	Inverse variance weighted (multiplicative random effects)	1.21094	6.24251	0.234903	0.819065	0.060051
148	Caproate (6:0)	Crohn's disease of colon	MR Egger	33.0644	5508	0.198485	0.172877	1
148	Caproate (6:0)	Crohn's disease of colon	Inverse variance weighted (fixed effects)	1.21094	4.89821	0.299371	0.788358	0.060051
148	Caproate (6:0)	Crohn's disease of colon	Weighted median	3.027	27.0059	0.339286	0.321227	0.810704
148	Caproate (6:0)	Crohn's disease of colon	Weighted mode	3.69721	55.7199	0.245323	0.352596	0.966718
148	Caproate (6:0)	Crohn's disease of colon	MR RAPS	1.22389	5.25088	0.285269	0.785695	0.0613302
149	Caprylate (8:0)	Crohn's disease of colon	Inverse variance weighted (multiplicative random effects)	35.6962	741.661	1.71806	0.0209083	1
149	Caprylate (8:0)	Crohn's disease of colon	Inverse variance weighted (fixed effects)	35.6962	6691.73	0.190417	0.180613	1
149	Caprylate (8:0)	Crohn's disease of colon	MR RAPS	36.2209	9373.29	0.139967	0.205396	1
150	10-undecenoate (11:1n1)	Crohn's disease of colon	Inverse variance weighted (multiplicative random effects)	1.99412	7.25326	0.548238	0.294793	0.28498
150	10-undecenoate (11:1n1)	Crohn's disease of colon	Inverse variance weighted (fixed effects)	1.99412	8.99791	0.441937	0.369292	0.28498
150	10-undecenoate (11:1n1)	Crohn's disease of colon	MR RAPS	1.99852	9.17126	0.435501	0.373094	0.287064
151	Docosapentaenoate (n3 DPA; 22:5n3)	Crohn's disease of colon	MR RAPS	0.265774	4.78688	0.0147561	0.368981	0.0793074
152	Phenol sulfate	Crohn's disease of colon	Inverse variance weighted (multiplicative random effects)	1.47525	3.23456	0.672849	0.33167	0.197545
152	Phenol sulfate	Crohn's disease of colon	MR Egger	0.30964	5.54558	0.0172889	0.373769	0.365297
152	Phenol sulfate	Crohn's disease of colon	Inverse variance weighted (fixed effects)	1.47525	3.40819	0.63857	0.362751	0.197545
152	Phenol sulfate	Crohn's disease of colon	Weighted median	1.14497	3.39273	0.3864	0.807024	0.0631551
152	Phenol sulfate	Crohn's disease of colon	Weighted mode	1.03939	3.2438	0.333045	0.948814	0.0509652
152	Phenol sulfate	Crohn's disease of colon	MR RAPS	1.49572	3.67681	0.608457	0.380302	0.210825
153	Bilirubin (E,E)*	Crohn's disease of colon	MR RAPS	0.883453	1.55086	0.503262	0.666026	0.0679328
154	Heme*	Crohn's disease of colon	Inverse variance weighted (multiplicative random effects)	1.1144	3.5827	0.346636	0.855742	0.0548555
154	Heme*	Crohn's disease of colon	MR Egger	21.1222	9846.23	0.0453116	0.289933	1
154	Heme*	Crohn's disease of colon	Inverse variance weighted (fixed effects)	1.1144	3.37211	0.368283	0.847943	0.0548555
154	Heme*	Crohn's disease of colon	Weighted median	2.72929	12.2609	0.607543	0.190238	0.874048
154	Heme*	Crohn's disease of colon	Weighted mode	3.70956	38.2761	0.359515	0.302961	0.998313
154	Heme*	Crohn's disease of colon	MR RAPS	1.11991	3.57616	0.350714	0.848379	0.0553361
155	1-linoleoylglycerophosphoethanolamine*	Crohn's disease of colon	MR RAPS	2.16013	11.0895	0.420772	0.356117	0.270159
156	3-dehydrocarnitine*	Crohn's disease of colon	MR RAPS	21.0098	13414.9	0.0329045	0.355491	1
157	Pyroglutamine*	Crohn's disease of colon	Inverse variance weighted (multiplicative random effects)	0.697409	1.15903	0.419643	0.164365	0.0716531
157	Pyroglutamine*	Crohn's disease of colon	Inverse variance weighted (fixed effects)	0.697409	2.74376	0.177267	0.606069	0.0716531
157	Pyroglutamine*	Crohn's disease of colon	MR RAPS	0.697218	2.80411	0.173357	0.611513	0.0716809
158	C-glycosyltryptophan*	Crohn's disease of colon	MR RAPS	2.86097	6293031209	1.3e-09	0.923699	0.135793
159	X-03056--N-[3-(2-Oxopyrrolidin-1-yl)propyl]acetamide	Crohn's disease of colon	MR RAPS	0.0701106	1.98341	0.0024783	0.119131	0.0850745
160	X-11422--xanthine	Crohn's disease of colon	Inverse variance weighted (multiplicative random effects)	0.191398	2.13428	0.0171641	0.179006	0.115747
160	X-11422--xanthine	Crohn's disease of colon	MR Egger	0.00308597	18.5002	5.15e-07	0.162205	0.151375
160	X-11422--xanthine	Crohn's disease of colon	Inverse variance weighted (fixed effects)	0.191398	2.82752	0.0129559	0.2288	0.115747
160	X-11422--xanthine	Crohn's disease of colon	Weighted median	0.129718	4.24463	0.00396427	0.25111	0.126522
160	X-11422--xanthine	Crohn's disease of colon	Weighted mode	0.110255	6.43721	0.00188843	0.347853	0.130102
160	X-11422--xanthine	Crohn's disease of colon	MR RAPS	0.183959	3.228	0.0104836	0.24675	0.117001
161	X-11423--O-sulfo-L-tyrosine	Crohn's disease of colon	MR RAPS	0.524213	388.553	0.000707237	0.848087	0.054527
162	X-11445--5-alpha-pregnan-3beta,20alpha-disulfate	Crohn's disease of colon	MR RAPS	1.73898	6.54333	0.462159	0.413143	0.222554
163	HWESASXX*	Crohn's disease of colon	Inverse variance weighted (multiplicative random effects)	0.264811	0.407347	0.172151	1.47e-09	0.230645
163	HWESASXX*	Crohn's disease of colon	Inverse variance weighted (fixed effects)	0.264811	0.928406	0.0755328	0.0378877	0.230645
163	HWESASXX*	Crohn's disease of colon	MR RAPS	0.262994	1.01433	0.0681885	0.0524606	0.23156
164	X-11593--O-methylascorbate*	Crohn's disease of colon	Inverse variance weighted (multiplicative random effects)	1.72431	4.51282	0.658848	0.267024	0.195206
164	X-11593--O-methylascorbate*	Crohn's disease of colon	MR Egger	2.16356	35.0279	0.133636	0.515515	0.421673
164	X-11593--O-methylascorbate*	Crohn's disease of colon	Inverse variance weighted (fixed effects)	1.72431	6.32413	0.470145	0.411234	0.195206
164	X-11593--O-methylascorbate*	Crohn's disease of colon	Weighted median	2.1579	8.61059	0.540794	0.275997	0.418325
164	X-11593--O-methylascorbate*	Crohn's disease of colon	Weighted mode	2.22621	9.48456	0.522536	0.328546	0.459089
164	X-11593--O-methylascorbate*	Crohn's disease of colon	MR RAPS	1.72676	6.39701	0.466106	0.41362	0.19621
165	Adrenate (22:4n6)	Crohn's disease of colon	MR RAPS	0.353732	2.85922	0.0437623	0.329716	0.0914363
166	Homostachydrine*	Crohn's disease of colon	Inverse variance weighted (multiplicative random effects)	0.9162	2.58204	0.3251	0.868501	0.0537393
166	Homostachydrine*	Crohn's disease of colon	MR Egger	14.822	496.413	0.442558	0.119648	1
166	Homostachydrine*	Crohn's disease of colon	Inverse variance weighted (fixed effects)	0.9162	2.22534	0.377211	0.846724	0.0537393
166	Homostachydrine*	Crohn's disease of colon	Weighted median	0.940399	3.23246	0.273585	0.92229	0.051889
166	Homostachydrine*	Crohn's disease of colon	Weighted mode	2.42977	19.8443	0.297505	0.445089	0.86702
166	Homostachydrine*	Crohn's disease of colon	MR RAPS	0.910495	2.29135	0.361795	0.842157	0.0542674
167	ADSGEGDFXAEGGGVR*	Crohn's disease of colon	Inverse variance weighted (multiplicative random effects)	0.862891	2.86737	0.259674	0.809796	0.0665639
167	ADSGEGDFXAEGGGVR*	Crohn's disease of colon	Inverse variance weighted (fixed effects)	0.862891	1.80139	0.413337	0.694544	0.0665639
167	ADSGEGDFXAEGGGVR*	Crohn's disease of colon	MR RAPS	0.859666	1.81672	0.406792	0.692037	0.0673602
169	X-11793--oxidized bilirubin*	Crohn's disease of colon	Inverse variance weighted (multiplicative random effects)	0.886818	1.23853	0.634981	0.48095	0.0597077
169	X-11793--oxidized bilirubin*	Crohn's disease of colon	Inverse variance weighted (fixed effects)	0.886818	1.85636	0.42365	0.749962	0.0597077
169	X-11793--oxidized bilirubin*	Crohn's disease of colon	MR RAPS	0.886761	1.86502	0.421627	0.751369	0.0597176
170	1-arachidonoylglycerophosphocholine*	Crohn's disease of colon	Inverse variance weighted (multiplicative random effects)	0.510625	1.13492	0.229741	0.0990648	0.124375
170	1-arachidonoylglycerophosphocholine*	Crohn's disease of colon	MR Egger	0.820524	122.756	0.00548453	0.89283	0.059685
170	1-arachidonoylglycerophosphocholine*	Crohn's disease of colon	Inverse variance weighted (fixed effects)	0.510625	1.64682	0.158328	0.260583	0.124375
170	1-arachidonoylglycerophosphocholine*	Crohn's disease of colon	Weighted median	0.555961	1.84809	0.16725	0.338117	0.110903
170	1-arachidonoylglycerophosphocholine*	Crohn's disease of colon	Weighted mode	0.565239	1.90484	0.167728	0.45453	0.10832
170	1-arachidonoylglycerophosphocholine*	Crohn's disease of colon	MR RAPS	0.509935	1.66415	0.156256	0.264417	0.124591
171	1-palmitoleoylglycerophosphocholine*	Crohn's disease of colon	MR RAPS	9.45152	672.799	0.132775	0.301991	0.999916
172	Gamma-glutamylmethionine*	Crohn's disease of colon	Inverse variance weighted (multiplicative random effects)	1.99214	3.85447	1.02961	0.0406909	0.270428
172	Gamma-glutamylmethionine*	Crohn's disease of colon	MR Egger	5.19781	150.954	0.178976	0.276912	0.999945
172	Gamma-glutamylmethionine*	Crohn's disease of colon	Inverse variance weighted (fixed effects)	1.99214	6.89449	0.575622	0.276566	0.270428
172	Gamma-glutamylmethionine*	Crohn's disease of colon	Weighted median	2.71743	13.0502	0.565844	0.21177	0.645919
172	Gamma-glutamylmethionine*	Crohn's disease of colon	Weighted mode	2.96706	17.861	0.492885	0.28836	0.763007
172	Gamma-glutamylmethionine*	Crohn's disease of colon	MR RAPS	2.00056	7.55244	0.529926	0.306266	0.274202
173	Gamma-glutamylthreonine*	Crohn's disease of colon	Inverse variance weighted (multiplicative random effects)	3.86567	8.38775	1.78158	0.000623467	0.98309
173	Gamma-glutamylthreonine*	Crohn's disease of colon	MR Egger	7.02302	426.715	0.115587	0.304637	1
173	Gamma-glutamylthreonine*	Crohn's disease of colon	Inverse variance weighted (fixed effects)	3.86567	14.8621	1.00547	0.0490749	0.98309
173	Gamma-glutamylthreonine*	Crohn's disease of colon	Weighted median	3.29204	18.0799	0.599426	0.170349	0.901867
173	Gamma-glutamylthreonine*	Crohn's disease of colon	Weighted mode	5.69458	53.4853	0.606303	0.171785	0.999999
173	Gamma-glutamylthreonine*	Crohn's disease of colon	MR RAPS	3.90352	16.5462	0.920902	0.064577	0.985275
174	Gamma-tocopherol	Crohn's disease of colon	Inverse variance weighted (multiplicative random effects)	1.76849	3.61912	0.864171	0.118657	0.576409
174	Gamma-tocopherol	Crohn's disease of colon	MR Egger	0.82502	4.32926	0.157223	0.801813	0.0781109
174	Gamma-tocopherol	Crohn's disease of colon	Inverse variance weighted (fixed effects)	1.76849	3.47386	0.900308	0.0979	0.576409
174	Gamma-tocopherol	Crohn's disease of colon	Weighted median	1.62964	4.22776	0.628169	0.315344	0.422435
174	Gamma-tocopherol	Crohn's disease of colon	Weighted mode	0.953818	3.44346	0.264202	0.943875	0.051928
174	Gamma-tocopherol	Crohn's disease of colon	MR RAPS	1.83283	3.77043	0.890947	0.0997135	0.645345
175	Gamma-glutamylphenylalanine	Crohn's disease of colon	Inverse variance weighted (multiplicative random effects)	32.7698	1124.22	0.955201	0.0530406	1
175	Gamma-glutamylphenylalanine	Crohn's disease of colon	Inverse variance weighted (fixed effects)	32.7698	4526.25	0.237252	0.165188	1
175	Gamma-glutamylphenylalanine	Crohn's disease of colon	MR RAPS	33.6111	6194.49	0.182373	0.186626	1
176	Isobutyrylcarnitine	Crohn's disease of colon	Inverse variance weighted (multiplicative random effects)	1.64625	2.55445	1.06095	0.0261523	0.0998168
176	Isobutyrylcarnitine	Crohn's disease of colon	Inverse variance weighted (fixed effects)	1.64625	11.4186	0.237345	0.613919	0.0998168
176	Isobutyrylcarnitine	Crohn's disease of colon	MR RAPS	1.64671	12.1647	0.222912	0.624938	0.0998894
177	Pseudouridine	Crohn's disease of colon	Inverse variance weighted (multiplicative random effects)	1.74387	12.1841	0.249594	0.575018	0.103908
177	Pseudouridine	Crohn's disease of colon	MR Egger	967.815	4.77252e+06	0.196262	0.108583	1
177	Pseudouridine	Crohn's disease of colon	Inverse variance weighted (fixed effects)	1.74387	13.9383	0.218182	0.600005	0.103908
177	Pseudouridine	Crohn's disease of colon	Weighted median	1.91047	40.5975	0.089905	0.678041	0.13154
177	Pseudouridine	Crohn's disease of colon	Weighted mode	3.22716	317.591	0.0327923	0.62156	0.529007
177	Pseudouridine	Crohn's disease of colon	MR RAPS	1.77816	15.8891	0.198995	0.606471	0.109108
178	Valerate	Crohn's disease of colon	Inverse variance weighted (multiplicative random effects)	0.992245	4.26672	0.230751	0.991653	0.0500129
178	Valerate	Crohn's disease of colon	MR Egger	22.3472	9470.8	0.05273	0.278817	1
178	Valerate	Crohn's disease of colon	Inverse variance weighted (fixed effects)	0.992245	4.50253	0.218666	0.99195	0.0500129
178	Valerate	Crohn's disease of colon	Weighted median	0.960968	7.54037	0.122469	0.969783	0.0503269
178	Valerate	Crohn's disease of colon	Weighted mode	1.59296	27.2243	0.0932079	0.755178	0.127851
178	Valerate	Crohn's disease of colon	MR RAPS	0.991947	4.91364	0.200251	0.992097	0.0500139
179	Palmitoleate (16:1n7)	Crohn's disease of colon	MR RAPS	5.34938	122.986	0.232676	0.294446	0.944758
181	Erythronate*	Crohn's disease of colon	Inverse variance weighted (multiplicative random effects)	0.577755	23.6127	0.0141365	0.77197	0.0555179
181	Erythronate*	Crohn's disease of colon	MR Egger	47879.3	8.09e+38	2.83e-30	0.661452	1
181	Erythronate*	Crohn's disease of colon	Inverse variance weighted (fixed effects)	0.577755	30.2695	0.0110276	0.785916	0.0555179
181	Erythronate*	Crohn's disease of colon	Weighted median	0.162616	17.6084	0.00150179	0.447297	0.0720305
181	Erythronate*	Crohn's disease of colon	Weighted mode	0.138088	24.92	0.000765184	0.532994	0.0733653
181	Erythronate*	Crohn's disease of colon	MR RAPS	0.573552	33.8912	0.00970639	0.789381	0.055629
182	Lathosterol	Crohn's disease of colon	Inverse variance weighted (multiplicative random effects)	1.24332	2.02452	0.763556	0.381301	0.110004
182	Lathosterol	Crohn's disease of colon	MR Egger	1.11416	5.17401	0.239919	0.882868	0.0629357
182	Lathosterol	Crohn's disease of colon	Inverse variance weighted (fixed effects)	1.24332	2.39754	0.644758	0.515672	0.110004
182	Lathosterol	Crohn's disease of colon	Weighted median	1.21032	2.86142	0.511944	0.663685	0.0945658
182	Lathosterol	Crohn's disease of colon	Weighted mode	1.45611	4.53354	0.467681	0.526477	0.266876
182	Lathosterol	Crohn's disease of colon	MR RAPS	1.24789	2.50956	0.620521	0.53442	0.112336
183	X-12095--N1-methyl-3-pyridone-4-carboxamide	Crohn's disease of colon	MR RAPS	18.1543	1169.09	0.281911	0.172515	1
184	X-12100--hydroxytryptophan*	Crohn's disease of colon	MR RAPS	44.9625	12520.3	0.161468	0.185134	1
185	Eicosenoate (20:1n9 or 11)	Crohn's disease of colon	Inverse variance weighted (multiplicative random effects)	1.84629	5.60727	0.607922	0.279313	0.33021
185	Eicosenoate (20:1n9 or 11)	Crohn's disease of colon	MR Egger	1.63443	53.0913	0.0503162	0.760314	0.207005
185	Eicosenoate (20:1n9 or 11)	Crohn's disease of colon	Inverse variance weighted (fixed effects)	1.84629	5.61209	0.6074	0.279684	0.33021
185	Eicosenoate (20:1n9 or 11)	Crohn's disease of colon	Weighted median	2.68388	14.1128	0.510403	0.24369	0.857035
185	Eicosenoate (20:1n9 or 11)	Crohn's disease of colon	Weighted mode	5.28744	51.8825	0.538853	0.1834	1
185	Eicosenoate (20:1n9 or 11)	Crohn's disease of colon	MR RAPS	1.89247	6.09797	0.58732	0.285282	0.360684
186	X-12244--N-acetylcarnosine	Crohn's disease of colon	Inverse variance weighted (multiplicative random effects)	1.19218	2.91126	0.488208	0.699562	0.054329
186	X-12244--N-acetylcarnosine	Crohn's disease of colon	MR Egger	1201.82	2.87e+23	5.03e-18	0.632944	1
186	X-12244--N-acetylcarnosine	Crohn's disease of colon	Inverse variance weighted (fixed effects)	1.19218	8.57598	0.16573	0.861384	0.054329
186	X-12244--N-acetylcarnosine	Crohn's disease of colon	Weighted median	1.32967	13.2269	0.133669	0.807931	0.0627892
186	X-12244--N-acetylcarnosine	Crohn's disease of colon	Weighted mode	1.51866	22.8842	0.100783	0.791226	0.0819384
186	X-12244--N-acetylcarnosine	Crohn's disease of colon	MR RAPS	1.19254	8.89454	0.159891	0.863624	0.0543452
188	1-eicosatrienoylglycerophosphocholine*	Crohn's disease of colon	Inverse variance weighted (multiplicative random effects)	1.43989	5.41414	0.38294	0.589534	0.073013
188	1-eicosatrienoylglycerophosphocholine*	Crohn's disease of colon	Inverse variance weighted (fixed effects)	1.43989	13.5506	0.153004	0.749929	0.073013
188	1-eicosatrienoylglycerophosphocholine*	Crohn's disease of colon	MR RAPS	1.44193	14.4864	0.143525	0.755873	0.0732292
189	1-docosahexaenoylglycerophosphocholine*	Crohn's disease of colon	Inverse variance weighted (multiplicative random effects)	0.305803	2.6952	0.034697	0.285943	0.115752
189	1-docosahexaenoylglycerophosphocholine*	Crohn's disease of colon	MR Egger	0.0110214	5455.97	2.23e-08	0.426754	0.186659
189	1-docosahexaenoylglycerophosphocholine*	Crohn's disease of colon	Inverse variance weighted (fixed effects)	0.305803	1.88894	0.0495067	0.202177	0.115752
189	1-docosahexaenoylglycerophosphocholine*	Crohn's disease of colon	Weighted median	0.390536	4.79527	0.031806	0.462442	0.100316
189	1-docosahexaenoylglycerophosphocholine*	Crohn's disease of colon	Weighted mode	2.63806	355.859	0.0195565	0.714219	0.417067
189	1-docosahexaenoylglycerophosphocholine*	Crohn's disease of colon	MR RAPS	0.282821	1.89905	0.0421198	0.193641	0.120316
190	1-eicosadienoylglycerophosphocholine*	Crohn's disease of colon	MR RAPS	6.70403	278.51	0.161373	0.316977	0.896831
192	X-12442--5,8-tetradecadienoate	Crohn's disease of colon	MR RAPS	0.566948	3.15399	0.101912	0.516907	0.0811678
193	Octanoylcarnitine	Crohn's disease of colon	Inverse variance weighted (multiplicative random effects)	2.07525	3.34211	1.2886	0.00267398	0.687482
193	Octanoylcarnitine	Crohn's disease of colon	Inverse variance weighted (fixed effects)	2.07525	5.11238	0.842397	0.112477	0.687482
193	Octanoylcarnitine	Crohn's disease of colon	MR RAPS	2.0762	5.15482	0.836231	0.115366	0.688252
194	Alpha-hydroxyisovalerate	Crohn's disease of colon	Inverse variance weighted (multiplicative random effects)	1.73912	3.53183	0.856365	0.125768	0.187738
194	Alpha-hydroxyisovalerate	Crohn's disease of colon	MR Egger	6.30232	148656	0.000267189	0.575644	1
194	Alpha-hydroxyisovalerate	Crohn's disease of colon	Inverse variance weighted (fixed effects)	1.73912	6.79984	0.444795	0.426348	0.187738
194	Alpha-hydroxyisovalerate	Crohn's disease of colon	Weighted median	1.84266	7.96644	0.426213	0.413201	0.230035
194	Alpha-hydroxyisovalerate	Crohn's disease of colon	Weighted mode	2.34847	12.7903	0.431212	0.427573	0.496372
194	Alpha-hydroxyisovalerate	Crohn's disease of colon	MR RAPS	1.74155	7.01491	0.432362	0.435134	0.188666
195	N-acetylthreonine	Crohn's disease of colon	Inverse variance weighted (multiplicative random effects)	1.73629	9.43847	0.319406	0.522985	0.139052
195	N-acetylthreonine	Crohn's disease of colon	MR Egger	0.210111	40.1923	0.00109839	0.520666	0.154348
195	N-acetylthreonine	Crohn's disease of colon	Inverse variance weighted (fixed effects)	1.73629	8.4842	0.355332	0.49545	0.139052
195	N-acetylthreonine	Crohn's disease of colon	Weighted median	0.711242	5.76775	0.087706	0.749661	0.0633668
195	N-acetylthreonine	Crohn's disease of colon	Weighted mode	0.616699	5.43954	0.0699173	0.673682	0.0737083
195	N-acetylthreonine	Crohn's disease of colon	MR RAPS	1.77939	9.58671	0.330273	0.502426	0.150085
196	Decanoylcarnitine	Crohn's disease of colon	Inverse variance weighted (multiplicative random effects)	1.74448	4.97963	0.61113	0.298431	0.342189
196	Decanoylcarnitine	Crohn's disease of colon	MR Egger	10.1359	4526.29	0.0226977	0.34976	1
196	Decanoylcarnitine	Crohn's disease of colon	Inverse variance weighted (fixed effects)	1.74448	4.63845	0.656082	0.264734	0.342189
196	Decanoylcarnitine	Crohn's disease of colon	Weighted median	1.95844	6.02691	0.636393	0.241204	0.515554
196	Decanoylcarnitine	Crohn's disease of colon	Weighted mode	2.14046	7.66988	0.597344	0.362975	0.662247
196	Decanoylcarnitine	Crohn's disease of colon	MR RAPS	1.75124	4.70622	0.651656	0.266594	0.347367
197	1-palmitoylglycerophosphocholine	Crohn's disease of colon	Inverse variance weighted (multiplicative random effects)	0.508296	3.63844	0.0710097	0.500402	0.0902269
197	1-palmitoylglycerophosphocholine	Crohn's disease of colon	MR Egger	0.00133507	12.4818	1.43e-07	0.149887	0.223119
197	1-palmitoylglycerophosphocholine	Crohn's disease of colon	Inverse variance weighted (fixed effects)	0.508296	2.68027	0.0963948	0.425027	0.0902269
197	1-palmitoylglycerophosphocholine	Crohn's disease of colon	Weighted median	0.813557	10.301	0.0642534	0.873424	0.0556616
197	1-palmitoylglycerophosphocholine	Crohn's disease of colon	Weighted mode	3.81054	1112.61	0.0130506	0.647604	0.919088
197	1-palmitoylglycerophosphocholine	Crohn's disease of colon	MR RAPS	0.485244	2.72707	0.0863424	0.411658	0.0941771
198	1-heptadecanoylglycerophosphocholine	Crohn's disease of colon	Inverse variance weighted (multiplicative random effects)	0.7609	2.45619	0.235718	0.64765	0.0668477
198	1-heptadecanoylglycerophosphocholine	Crohn's disease of colon	MR Egger	2.22876	712.486	0.0069719	0.757981	0.498058
198	1-heptadecanoylglycerophosphocholine	Crohn's disease of colon	Inverse variance weighted (fixed effects)	0.7609	2.71777	0.213031	0.673975	0.0668477
198	1-heptadecanoylglycerophosphocholine	Crohn's disease of colon	Weighted median	1.02225	5.51811	0.189376	0.979588	0.0501442
198	1-heptadecanoylglycerophosphocholine	Crohn's disease of colon	Weighted mode	1.02764	8.10985	0.130218	0.979995	0.0502224
198	1-heptadecanoylglycerophosphocholine	Crohn's disease of colon	MR RAPS	0.755293	2.93094	0.194636	0.684988	0.0676558
199	1-oleoylglycerophosphocholine	Crohn's disease of colon	Inverse variance weighted (multiplicative random effects)	0.626474	4.25059	0.0923329	0.632144	0.0704606
199	1-oleoylglycerophosphocholine	Crohn's disease of colon	MR Egger	0.037386	7.12856	0.000196073	0.196585	0.192648
199	1-oleoylglycerophosphocholine	Crohn's disease of colon	Inverse variance weighted (fixed effects)	0.626474	2.87632	0.136448	0.547591	0.0704606
199	1-oleoylglycerophosphocholine	Crohn's disease of colon	Weighted median	0.203368	1.9006	0.0217608	0.162467	0.146434
199	1-oleoylglycerophosphocholine	Crohn's disease of colon	Weighted mode	0.0828443	2.3247	0.00295228	0.173875	0.179069
199	1-oleoylglycerophosphocholine	Crohn's disease of colon	MR RAPS	0.605394	2.90768	0.126046	0.530756	0.0728694
200	1-stearoylglycerophosphocholine	Crohn's disease of colon	Inverse variance weighted (multiplicative random effects)	2.54125	9.3565	0.690209	0.160775	0.763645
200	1-stearoylglycerophosphocholine	Crohn's disease of colon	MR Egger	2.16125	49.0169	0.0952938	0.601329	0.522629
200	1-stearoylglycerophosphocholine	Crohn's disease of colon	Inverse variance weighted (fixed effects)	2.54125	7.89318	0.818166	0.10676	0.763645
200	1-stearoylglycerophosphocholine	Crohn's disease of colon	Weighted median	2.01677	11.1929	0.363386	0.422392	0.423056
200	1-stearoylglycerophosphocholine	Crohn's disease of colon	Weighted mode	1.70841	12.9378	0.225592	0.613552	0.23354
200	1-stearoylglycerophosphocholine	Crohn's disease of colon	MR RAPS	2.67606	8.89443	0.805142	0.108205	0.829789
201	5-dodecenoate (12:1n7)	Crohn's disease of colon	MR RAPS	7.37592	329.645	0.165039	0.302674	0.995033
202	Stearidonate (18:4n3)	Crohn's disease of colon	MR RAPS	0.238049	2.14273	0.0264463	0.200461	0.105001
203	10-heptadecenoate (17:1n7)	Crohn's disease of colon	Inverse variance weighted (multiplicative random effects)	0.402072	8.27221	0.0195427	0.55483	0.0892659
203	10-heptadecenoate (17:1n7)	Crohn's disease of colon	MR Egger	4072.39	7.66e+16	2.16e-10	0.478027	1
203	10-heptadecenoate (17:1n7)	Crohn's disease of colon	Inverse variance weighted (fixed effects)	0.402072	2.82309	0.0572641	0.359516	0.0892659
203	10-heptadecenoate (17:1n7)	Crohn's disease of colon	Weighted median	0.499402	6.57546	0.0379292	0.597527	0.0773322
203	10-heptadecenoate (17:1n7)	Crohn's disease of colon	Weighted mode	0.588969	8.61619	0.0402595	0.724761	0.0683208
203	10-heptadecenoate (17:1n7)	Crohn's disease of colon	MR RAPS	0.379318	2.97334	0.0483906	0.356142	0.0923836
204	10-nonadecenoate (19:1n9)	Crohn's disease of colon	MR RAPS	12.6803	826.808	0.19447	0.233366	1
205	Epiandrosterone sulfate	Crohn's disease of colon	Inverse variance weighted (multiplicative random effects)	1.19856	2.86417	0.50156	0.683635	0.0964617
205	Epiandrosterone sulfate	Crohn's disease of colon	Inverse variance weighted (fixed effects)	1.19856	1.97841	0.726114	0.478731	0.0964617
205	Epiandrosterone sulfate	Crohn's disease of colon	MR RAPS	1.19983	1.98527	0.725141	0.478267	0.0970697
206	Linolenate [alpha or gamma; (18:3n3 or 6)]	Crohn's disease of colon	Inverse variance weighted (multiplicative random effects)	2.29616	18.9234	0.278616	0.439846	0.289356
206	Linolenate [alpha or gamma; (18:3n3 or 6)]	Crohn's disease of colon	MR Egger	3.22936	468157	2.23e-05	0.744474	0.677788
206	Linolenate [alpha or gamma; (18:3n3 or 6)]	Crohn's disease of colon	Inverse variance weighted (fixed effects)	2.29616	22.3979	0.235396	0.474431	0.289356
206	Linolenate [alpha or gamma; (18:3n3 or 6)]	Crohn's disease of colon	Weighted median	2.11068	36.8539	0.120882	0.608688	0.225179
206	Linolenate [alpha or gamma; (18:3n3 or 6)]	Crohn's disease of colon	Weighted mode	2.07252	51.3899	0.0835834	0.699917	0.213114
206	Linolenate [alpha or gamma; (18:3n3 or 6)]	Crohn's disease of colon	MR RAPS	2.33547	27.0056	0.201973	0.49703	0.304041
207	X-12510--2-aminooctanoic acid	Crohn's disease of colon	Inverse variance weighted (multiplicative random effects)	1.18432	3.04025	0.461349	0.725065	0.082749
207	X-12510--2-aminooctanoic acid	Crohn's disease of colon	MR Egger	2.6859	37.956	0.190064	0.354697	0.998044
207	X-12510--2-aminooctanoic acid	Crohn's disease of colon	Inverse variance weighted (fixed effects)	1.18432	2.42791	0.577704	0.644163	0.082749
207	X-12510--2-aminooctanoic acid	Crohn's disease of colon	Weighted median	1.37291	2.84899	0.6616	0.394817	0.188391
207	X-12510--2-aminooctanoic acid	Crohn's disease of colon	Weighted mode	1.38126	2.76047	0.691149	0.457064	0.194813
207	X-12510--2-aminooctanoic acid	Crohn's disease of colon	MR RAPS	1.18521	2.43827	0.57611	0.644319	0.0830693
208	Bilirubin (E,Z or Z,E)*	Crohn's disease of colon	MR RAPS	0.82216	2.00519	0.337099	0.666839	0.0665826
209	1-arachidonoylglycerophosphoinositol*	Crohn's disease of colon	MR RAPS	1.702	43.1693	0.0671037	0.747169	0.0727393
210	Asparagine	Crohn's disease of colon	Inverse variance weighted (multiplicative random effects)	0.238377	1.33058	0.0427059	0.102166	0.0927971
210	Asparagine	Crohn's disease of colon	Inverse variance weighted (fixed effects)	0.238377	3.09018	0.0183884	0.272678	0.0927971
210	Asparagine	Crohn's disease of colon	MR RAPS	0.23779	3.20353	0.0176506	0.279012	0.0928648
211	Stachydrine	Crohn's disease of colon	Inverse variance weighted (multiplicative random effects)	1.08929	1.70427	0.696218	0.708046	0.0678
211	Stachydrine	Crohn's disease of colon	MR Egger	1.84679	21.2891	0.160206	0.554043	0.960204
211	Stachydrine	Crohn's disease of colon	Inverse variance weighted (fixed effects)	1.08929	1.70793	0.694727	0.709374	0.0678
211	Stachydrine	Crohn's disease of colon	Weighted median	1.36313	2.3597	0.787444	0.268519	0.35724
211	Stachydrine	Crohn's disease of colon	Weighted mode	1.36526	2.72195	0.684777	0.41698	0.360716
211	Stachydrine	Crohn's disease of colon	MR RAPS	1.09267	1.75818	0.679072	0.714966	0.0691891
212	Isovalerylcarnitine	Crohn's disease of colon	Inverse variance weighted (multiplicative random effects)	0.722222	13.4524	0.0387741	0.827357	0.0594373
212	Isovalerylcarnitine	Crohn's disease of colon	Inverse variance weighted (fixed effects)	0.722222	4.45264	0.117145	0.725841	0.0594373
212	Isovalerylcarnitine	Crohn's disease of colon	MR RAPS	0.718032	4.50438	0.114459	0.723671	0.0597262
215	1-linoleoylglycerophosphocholine	Crohn's disease of colon	Inverse variance weighted (multiplicative random effects)	0.835787	1.82197	0.383398	0.651876	0.0549764
215	1-linoleoylglycerophosphocholine	Crohn's disease of colon	MR Egger	0.312735	151.754	0.000644484	0.69003	0.141018
215	1-linoleoylglycerophosphocholine	Crohn's disease of colon	Inverse variance weighted (fixed effects)	0.835787	3.97313	0.175816	0.821566	0.0549764
215	1-linoleoylglycerophosphocholine	Crohn's disease of colon	Weighted median	0.461721	3.49432	0.0610095	0.454229	0.105033
215	1-linoleoylglycerophosphocholine	Crohn's disease of colon	Weighted mode	0.312745	5.17891	0.0188862	0.432804	0.141015
215	1-linoleoylglycerophosphocholine	Crohn's disease of colon	MR RAPS	0.833468	4.38371	0.158466	0.82971	0.0551185
216	Bradykinin, des-arg(9)	Crohn's disease of colon	Inverse variance weighted (multiplicative random effects)	1.01232	1.65279	0.620037	0.960951	0.0506383
216	Bradykinin, des-arg(9)	Crohn's disease of colon	MR Egger	0.816148	106.829	0.00623517	0.887035	0.200029
216	Bradykinin, des-arg(9)	Crohn's disease of colon	Inverse variance weighted (fixed effects)	1.01232	1.40401	0.729904	0.941505	0.0506383
216	Bradykinin, des-arg(9)	Crohn's disease of colon	Weighted median	0.945849	1.45855	0.613368	0.801089	0.0624214
216	Bradykinin, des-arg(9)	Crohn's disease of colon	Weighted mode	0.761983	1.74286	0.333142	0.585589	0.303092
216	Bradykinin, des-arg(9)	Crohn's disease of colon	MR RAPS	1.01251	1.40704	0.728604	0.940973	0.0506579
217	Gamma-glutamylisoleucine*	Crohn's disease of colon	Inverse variance weighted (multiplicative random effects)	1.35632	3.49914	0.525733	0.528495	0.105258
217	Gamma-glutamylisoleucine*	Crohn's disease of colon	MR Egger	1.10146	14.741	0.0823022	0.938871	0.0543778
217	Gamma-glutamylisoleucine*	Crohn's disease of colon	Inverse variance weighted (fixed effects)	1.35632	3.75715	0.489631	0.557678	0.105258
217	Gamma-glutamylisoleucine*	Crohn's disease of colon	Weighted median	2.02572	8.26298	0.496619	0.325028	0.504147
217	Gamma-glutamylisoleucine*	Crohn's disease of colon	Weighted mode	3.50141	35.6723	0.34368	0.302598	0.997935
217	Gamma-glutamylisoleucine*	Crohn's disease of colon	MR RAPS	1.3743	4.0139	0.470538	0.560965	0.111105
220	Isovalerate	Crohn's disease of colon	Inverse variance weighted (multiplicative random effects)	0.413308	6.62367	0.0257899	0.532468	0.0807347
220	Isovalerate	Crohn's disease of colon	MR Egger	0.000174931	6.81e+81	4.49e-90	0.901697	0.141956
220	Isovalerate	Crohn's disease of colon	Inverse variance weighted (fixed effects)	0.413308	3.9873	0.0428419	0.444857	0.0807347
220	Isovalerate	Crohn's disease of colon	Weighted median	0.522073	9.63402	0.0282914	0.662128	0.0702588
220	Isovalerate	Crohn's disease of colon	Weighted mode	0.663283	44.4844	0.00988988	0.860483	0.0599824
220	Isovalerate	Crohn's disease of colon	MR RAPS	0.39564	4.32223	0.0362154	0.447196	0.0826516
221	X-13183--stearamide	Crohn's disease of colon	Inverse variance weighted (multiplicative random effects)	0.841516	1.52213	0.465236	0.56824	0.0821996
221	X-13183--stearamide	Crohn's disease of colon	MR Egger	1.60275	7.57697	0.339028	0.511532	0.513509
221	X-13183--stearamide	Crohn's disease of colon	Inverse variance weighted (fixed effects)	0.841516	1.57154	0.450609	0.588191	0.0821996
221	X-13183--stearamide	Crohn's disease of colon	Weighted median	0.729355	1.74693	0.30451	0.478832	0.146277
221	X-13183--stearamide	Crohn's disease of colon	Weighted mode	0.76941	1.96824	0.300772	0.597681	0.119266
221	X-13183--stearamide	Crohn's disease of colon	MR RAPS	0.836813	1.62498	0.430932	0.598782	0.0841724
222	7-methylguanine	Crohn's disease of colon	Inverse variance weighted (multiplicative random effects)	0.75452	2.11857	0.26872	0.592825	0.0681413
222	7-methylguanine	Crohn's disease of colon	MR Egger	0.902898	27.8053	0.029319	0.946108	0.0528098
222	7-methylguanine	Crohn's disease of colon	Inverse variance weighted (fixed effects)	0.75452	2.41166	0.236062	0.634704	0.0681413
222	7-methylguanine	Crohn's disease of colon	Weighted median	0.859447	4.06258	0.181817	0.848426	0.0559004
222	7-methylguanine	Crohn's disease of colon	Weighted mode	0.790844	4.50866	0.138718	0.799218	0.0631289
222	7-methylguanine	Crohn's disease of colon	MR RAPS	0.749127	2.58439	0.217146	0.647543	0.0689566
224	Pro-hydroxy-pro	Crohn's disease of colon	MR RAPS	1.45282	327.984	0.00643531	0.892547	0.0534596
225	N2,N2-dimethylguanosine	Crohn's disease of colon	MR RAPS	4.34805	2960.03	0.00638695	0.658778	0.184393
226	Cysteine-glutathione disulfide	Crohn's disease of colon	MR RAPS	2.59832	12.5939	0.536077	0.235717	0.546379
229	X-13431--nonanoylcarnitine*	Crohn's disease of colon	Inverse variance weighted (multiplicative random effects)	1.83088	2.90544	1.15374	0.0102588	0.725839
229	X-13431--nonanoylcarnitine*	Crohn's disease of colon	Inverse variance weighted (fixed effects)	1.83088	3.45813	0.969345	0.0623162	0.725839
229	X-13431--nonanoylcarnitine*	Crohn's disease of colon	MR RAPS	1.83182	3.47469	0.965718	0.0638536	0.726804
230	2-palmitoylglycerophosphocholine*	Crohn's disease of colon	Inverse variance weighted (multiplicative random effects)	1.25032	3.7902	0.412459	0.692975	0.0688233
230	2-palmitoylglycerophosphocholine*	Crohn's disease of colon	MR Egger	0.730473	5.33791	0.0999625	0.742448	0.071959
230	2-palmitoylglycerophosphocholine*	Crohn's disease of colon	Inverse variance weighted (fixed effects)	1.25032	3.87917	0.402999	0.698956	0.0688233
230	2-palmitoylglycerophosphocholine*	Crohn's disease of colon	Weighted median	0.756074	4.23178	0.135084	0.750319	0.0679427
230	2-palmitoylglycerophosphocholine*	Crohn's disease of colon	Weighted mode	0.709901	4.20156	0.119946	0.710628	0.0754906
230	2-palmitoylglycerophosphocholine*	Crohn's disease of colon	MR RAPS	1.26208	4.19035	0.380125	0.703816	0.0706521
231	2-oleoylglycerophosphocholine*	Crohn's disease of colon	Inverse variance weighted (multiplicative random effects)	1.07265	4.20888	0.273371	0.919904	0.05127
231	2-oleoylglycerophosphocholine*	Crohn's disease of colon	MR Egger	0.0699714	13.16	0.000372036	0.29865	0.27333
231	2-oleoylglycerophosphocholine*	Crohn's disease of colon	Inverse variance weighted (fixed effects)	1.07265	4.27719	0.269005	0.920833	0.05127
231	2-oleoylglycerophosphocholine*	Crohn's disease of colon	Weighted median	0.607552	4.82239	0.076543	0.637302	0.0879571
231	2-oleoylglycerophosphocholine*	Crohn's disease of colon	Weighted mode	0.148358	3.61347	0.00609108	0.258601	0.236685
231	2-oleoylglycerophosphocholine*	Crohn's disease of colon	MR RAPS	1.07597	4.60158	0.251592	0.921324	0.0513888
232	2-stearoylglycerophosphocholine*	Crohn's disease of colon	MR RAPS	1.05276	121.247	0.00914089	0.983061	0.0500916
233	2-linoleoylglycerophosphocholine*	Crohn's disease of colon	MR RAPS	10.4704	984.089	0.111401	0.310963	0.999432
234	1-palmitoylglycerophosphoinositol*	Crohn's disease of colon	Inverse variance weighted (multiplicative random effects)	0.645806	1.90897	0.218477	0.429094	0.106199
234	1-palmitoylglycerophosphoinositol*	Crohn's disease of colon	MR Egger	0.398272	9.02355	0.0175785	0.518154	0.217208
234	1-palmitoylglycerophosphoinositol*	Crohn's disease of colon	Inverse variance weighted (fixed effects)	0.645806	1.87546	0.22238	0.421468	0.106199
234	1-palmitoylglycerophosphoinositol*	Crohn's disease of colon	Weighted median	1.05372	4.3901	0.252914	0.94271	0.0512529
234	1-palmitoylglycerophosphoinositol*	Crohn's disease of colon	Weighted mode	1.02482	5.07853	0.206803	0.976784	0.0502674
234	1-palmitoylglycerophosphoinositol*	Crohn's disease of colon	MR RAPS	0.63489	1.96744	0.204878	0.431121	0.109808
236	Hydroxyisovaleroyl carnitine	Crohn's disease of colon	MR RAPS	8.91684	134.157	0.592666	0.113695	0.999999
237	Glutaroyl carnitine	Crohn's disease of colon	Inverse variance weighted (multiplicative random effects)	0.826061	2.85998	0.238595	0.762974	0.060083
237	Glutaroyl carnitine	Crohn's disease of colon	MR Egger	2.50234	4892.88	0.00127976	0.771245	0.72193
237	Glutaroyl carnitine	Crohn's disease of colon	Inverse variance weighted (fixed effects)	0.826061	2.67855	0.254756	0.750197	0.060083
237	Glutaroyl carnitine	Crohn's disease of colon	Weighted median	1.01428	4.68481	0.219595	0.98551	0.0500674
237	Glutaroyl carnitine	Crohn's disease of colon	Weighted mode	1.2021	7.18453	0.201134	0.84803	0.0635951
237	Glutaroyl carnitine	Crohn's disease of colon	MR RAPS	0.824503	2.70389	0.251417	0.750133	0.0602656
239	4-hydroxyhippurate	Crohn's disease of colon	Inverse variance weighted (multiplicative random effects)	0.674024	1.37668	0.330002	0.27896	0.147736
239	4-hydroxyhippurate	Crohn's disease of colon	MR Egger	7.33737	321.022	0.167705	0.258793	1
239	4-hydroxyhippurate	Crohn's disease of colon	Inverse variance weighted (fixed effects)	0.674024	1.37443	0.330542	0.277856	0.147736
239	4-hydroxyhippurate	Crohn's disease of colon	Weighted median	0.6493	1.64576	0.256167	0.362773	0.163614
239	4-hydroxyhippurate	Crohn's disease of colon	Weighted mode	0.595111	2.77372	0.127683	0.529819	0.20267
239	4-hydroxyhippurate	Crohn's disease of colon	MR RAPS	0.662416	1.40653	0.311969	0.283694	0.155037
240	1-myristoylglycerophosphocholine	Crohn's disease of colon	Inverse variance weighted (multiplicative random effects)	0.831601	1.83981	0.375886	0.648992	0.0573426
240	1-myristoylglycerophosphocholine	Crohn's disease of colon	MR Egger	0.998854	55.1398	0.0180942	0.999417	0.0500003
240	1-myristoylglycerophosphocholine	Crohn's disease of colon	Inverse variance weighted (fixed effects)	0.831601	2.82949	0.244411	0.767868	0.0573426
240	1-myristoylglycerophosphocholine	Crohn's disease of colon	Weighted median	0.919014	4.08309	0.20685	0.911619	0.0516911
240	1-myristoylglycerophosphocholine	Crohn's disease of colon	Weighted mode	0.840479	3.92184	0.180121	0.835821	0.0565853
240	1-myristoylglycerophosphocholine	Crohn's disease of colon	MR RAPS	0.830114	3.10434	0.221976	0.782028	0.0574735
243	3-(3-hydroxyphenyl)propionate	Crohn's disease of colon	Inverse variance weighted (multiplicative random effects)	0.90336	1.16176	0.702435	0.428453	0.0797836
243	3-(3-hydroxyphenyl)propionate	Crohn's disease of colon	MR Egger	1.26862	4.77366	0.337143	0.678757	0.289439
243	3-(3-hydroxyphenyl)propionate	Crohn's disease of colon	Inverse variance weighted (fixed effects)	0.90336	1.31081	0.622562	0.592587	0.0797836
243	3-(3-hydroxyphenyl)propionate	Crohn's disease of colon	Weighted median	0.88681	1.4329	0.548838	0.623648	0.0910799
243	3-(3-hydroxyphenyl)propionate	Crohn's disease of colon	Weighted mode	0.943437	1.76982	0.502917	0.862022	0.0600946
243	3-(3-hydroxyphenyl)propionate	Crohn's disease of colon	MR RAPS	0.90091	1.33877	0.606258	0.60561	0.0813372
244	Tetradecanedioate	Crohn's disease of colon	MR RAPS	0.427829	1.95132	0.0938019	0.272825	0.097328
245	2-hydroxypalmitate	Crohn's disease of colon	MR RAPS	0.303044	747.693	0.000122826	0.764496	0.0538207
246	Hexadecanedioate	Crohn's disease of colon	MR RAPS	0.385707	2.05539	0.0723804	0.264417	0.103466
247	Dihomo-linolenate (20:3n3 or n6)	Crohn's disease of colon	Inverse variance weighted (multiplicative random effects)	1.00752	13.9749	0.0726374	0.995544	0.0500045
247	Dihomo-linolenate (20:3n3 or n6)	Crohn's disease of colon	Inverse variance weighted (fixed effects)	1.00752	14.8221	0.0684855	0.995642	0.0500045
247	Dihomo-linolenate (20:3n3 or n6)	Crohn's disease of colon	MR RAPS	1.00758	15.6528	0.0648583	0.995695	0.0500046
248	Threitol	Crohn's disease of colon	Inverse variance weighted (multiplicative random effects)	1.07438	3.94957	0.292256	0.91399	0.0528146
248	Threitol	Crohn's disease of colon	MR Egger	1.08552	41.2557	0.028562	0.961381	0.0537226
248	Threitol	Crohn's disease of colon	Inverse variance weighted (fixed effects)	1.07438	2.73098	0.422663	0.880195	0.0528146
248	Threitol	Crohn's disease of colon	Weighted median	0.865893	3.61019	0.207682	0.843301	0.0592021
248	Threitol	Crohn's disease of colon	Weighted mode	0.703528	4.74043	0.104411	0.724738	0.0958764
248	Threitol	Crohn's disease of colon	MR RAPS	1.08043	2.84104	0.410885	0.875372	0.0532926
249	P-cresol sulfate	Crohn's disease of colon	Inverse variance weighted (multiplicative random effects)	1.28426	2.18558	0.754644	0.35639	0.174798
249	P-cresol sulfate	Crohn's disease of colon	MR Egger	1.53965	3.95298	0.599677	0.340099	0.48934
249	P-cresol sulfate	Crohn's disease of colon	Inverse variance weighted (fixed effects)	1.28426	2.13253	0.773418	0.333566	0.174798
249	P-cresol sulfate	Crohn's disease of colon	Weighted median	1.24764	2.62866	0.592167	0.560622	0.14402
249	P-cresol sulfate	Crohn's disease of colon	Weighted mode	1.55195	3.50185	0.687796	0.310636	0.506896
249	P-cresol sulfate	Crohn's disease of colon	MR RAPS	1.29869	2.19674	0.767771	0.32977	0.188129
250	X-14189--leucylalanine	Crohn's disease of colon	MR RAPS	0.562008	1.94531	0.162366	0.363028	0.110254
251	X-14205--alpha-glutamyltyrosine	Crohn's disease of colon	MR RAPS	0.464812	2.47228	0.0873893	0.368929	0.10075
252	X-14208--phenylalanylserine	Crohn's disease of colon	Inverse variance weighted (multiplicative random effects)	0.507106	2.13887	0.12023	0.355131	0.178339
252	X-14208--phenylalanylserine	Crohn's disease of colon	Inverse variance weighted (fixed effects)	0.507106	1.33744	0.192275	0.169951	0.178339
252	X-14208--phenylalanylserine	Crohn's disease of colon	MR RAPS	0.500871	1.35057	0.185752	0.171884	0.181705
253	X-14304--leucylalanine	Crohn's disease of colon	MR RAPS	0.531059	2.09628	0.134535	0.366298	0.10705
254	X-14450--phenylalanylleucine	Crohn's disease of colon	Inverse variance weighted (multiplicative random effects)	1.44691	2.32797	0.899297	0.127872	0.151825
254	X-14450--phenylalanylleucine	Crohn's disease of colon	MR Egger	0.885475	4470.31	0.000175394	0.967917	0.0564586
254	X-14450--phenylalanylleucine	Crohn's disease of colon	Inverse variance weighted (fixed effects)	1.44691	3.84684	0.544223	0.458997	0.151825
254	X-14450--phenylalanylleucine	Crohn's disease of colon	Weighted median	1.4246	4.41211	0.45998	0.539495	0.141666
254	X-14450--phenylalanylleucine	Crohn's disease of colon	Weighted mode	1.31325	5.51933	0.31247	0.734611	0.0991849
254	X-14450--phenylalanylleucine	Crohn's disease of colon	MR RAPS	1.45087	4.13045	0.509633	0.485674	0.153686
255	Gamma-glutamylglutamate	Crohn's disease of colon	Inverse variance weighted (multiplicative random effects)	0.996986	1.8064	0.550254	0.992057	0.0500107
255	Gamma-glutamylglutamate	Crohn's disease of colon	MR Egger	2.6064	22.4906	0.302051	0.339459	0.999266
255	Gamma-glutamylglutamate	Crohn's disease of colon	Inverse variance weighted (fixed effects)	0.996986	1.939	0.512626	0.992903	0.0500107
255	Gamma-glutamylglutamate	Crohn's disease of colon	Weighted median	1.4834	3.6588	0.601418	0.391937	0.339959
255	Gamma-glutamylglutamate	Crohn's disease of colon	Weighted mode	1.53276	3.99561	0.587982	0.407775	0.399319
255	Gamma-glutamylglutamate	Crohn's disease of colon	MR RAPS	0.996877	2.00973	0.494476	0.993024	0.0500115
256	Octadecanedioate	Crohn's disease of colon	Inverse variance weighted (multiplicative random effects)	0.431179	0.475822	0.390724	7.21e-63	0.0982065
256	Octadecanedioate	Crohn's disease of colon	Inverse variance weighted (fixed effects)	0.431179	3.28331	0.0566243	0.416682	0.0982065
256	Octadecanedioate	Crohn's disease of colon	MR RAPS	0.431154	3.49449	0.0531963	0.430681	0.0982108
257	Leucylleucine	Crohn's disease of colon	Inverse variance weighted (multiplicative random effects)	0.866169	1.59756	0.46962	0.645502	0.0582292
257	Leucylleucine	Crohn's disease of colon	MR Egger	0.472988	13.6659	0.0163705	0.623552	0.184108
257	Leucylleucine	Crohn's disease of colon	Inverse variance weighted (fixed effects)	0.866169	2.22516	0.337167	0.765347	0.0582292
257	Leucylleucine	Crohn's disease of colon	Weighted median	0.781188	2.70696	0.225439	0.69694	0.0721852
257	Leucylleucine	Crohn's disease of colon	Weighted mode	0.77894	3.45865	0.175429	0.750989	0.0726494
257	Leucylleucine	Crohn's disease of colon	MR RAPS	0.864576	2.36948	0.315467	0.777258	0.0584273
258	7-alpha-hydroxy-3-oxo-4-cholestenoate (7-Hoca)	Crohn's disease of colon	Inverse variance weighted (multiplicative random effects)	0.204276	1.57981	0.0264137	0.128052	0.122739
258	7-alpha-hydroxy-3-oxo-4-cholestenoate (7-Hoca)	Crohn's disease of colon	MR Egger	0.0371288	11.3823	0.000121113	0.231993	0.157913
258	7-alpha-hydroxy-3-oxo-4-cholestenoate (7-Hoca)	Crohn's disease of colon	Inverse variance weighted (fixed effects)	0.204276	1.21654	0.0343011	0.0810388	0.122739
258	7-alpha-hydroxy-3-oxo-4-cholestenoate (7-Hoca)	Crohn's disease of colon	Weighted median	0.266374	3.13385	0.0226416	0.292894	0.111521
258	7-alpha-hydroxy-3-oxo-4-cholestenoate (7-Hoca)	Crohn's disease of colon	Weighted mode	0.1328	3.71382	0.00474873	0.262298	0.136888
258	7-alpha-hydroxy-3-oxo-4-cholestenoate (7-Hoca)	Crohn's disease of colon	MR RAPS	0.190857	1.24501	0.029258	0.0834578	0.125294
259	N-Butyl Oleate	Crohn's disease of colon	Inverse variance weighted (multiplicative random effects)	0.368733	1.88489	0.0721334	0.230712	0.117612
259	N-Butyl Oleate	Crohn's disease of colon	MR Egger	7.48e-05	1.78063	3.14e-09	0.0673354	0.224748
259	N-Butyl Oleate	Crohn's disease of colon	Inverse variance weighted (fixed effects)	0.368733	1.9199	0.070818	0.235955	0.117612
259	N-Butyl Oleate	Crohn's disease of colon	Weighted median	0.26398	2.44379	0.0285154	0.240786	0.142803
259	N-Butyl Oleate	Crohn's disease of colon	Weighted mode	0.1001	3.49401	0.00286776	0.244739	0.190624
259	N-Butyl Oleate	Crohn's disease of colon	MR RAPS	0.355477	2.03382	0.0621311	0.245132	0.120568
260	Dimethylarginine (SDMA + ADMA)	Crohn's disease of colon	MR RAPS	0.0273033	114.421	6.52e-06	0.397466	0.0559337
261	Taurolithocholate 3-sulfate	Crohn's disease of colon	Inverse variance weighted (multiplicative random effects)	0.756109	1.187	0.481635	0.224373	0.129818
261	Taurolithocholate 3-sulfate	Crohn's disease of colon	MR Egger	0.711241	3.56415	0.141931	0.634922	0.162981
261	Taurolithocholate 3-sulfate	Crohn's disease of colon	Inverse variance weighted (fixed effects)	0.756109	1.44614	0.39533	0.398107	0.129818
261	Taurolithocholate 3-sulfate	Crohn's disease of colon	Weighted median	0.522849	1.20913	0.226088	0.129512	0.361861
261	Taurolithocholate 3-sulfate	Crohn's disease of colon	Weighted mode	0.533207	1.47407	0.192874	0.2648	0.348866
261	Taurolithocholate 3-sulfate	Crohn's disease of colon	MR RAPS	0.752887	1.50491	0.37666	0.421815	0.132001
262	X-14977--vanillin	Crohn's disease of colon	Inverse variance weighted (multiplicative random effects)	1.08516	3.26518	0.360642	0.88439	0.0526615
262	X-14977--vanillin	Crohn's disease of colon	MR Egger	11.8096	239.106	0.583288	0.100324	1
262	X-14977--vanillin	Crohn's disease of colon	Inverse variance weighted (fixed effects)	1.08516	3.34403	0.352139	0.886825	0.0526615
262	X-14977--vanillin	Crohn's disease of colon	Weighted median	0.787792	3.64716	0.170164	0.760317	0.0667069
262	X-14977--vanillin	Crohn's disease of colon	Weighted mode	0.615961	8.80023	0.0431134	0.731511	0.105825
262	X-14977--vanillin	Crohn's disease of colon	MR RAPS	1.09107	3.52359	0.337848	0.884139	0.0530448
263	Succinylcarnitine	Crohn's disease of colon	Inverse variance weighted (multiplicative random effects)	2.26832	4.14493	1.24134	0.00774697	0.375175
263	Succinylcarnitine	Crohn's disease of colon	MR Egger	2.51862	147.464	0.043017	0.590918	0.502492
263	Succinylcarnitine	Crohn's disease of colon	Inverse variance weighted (fixed effects)	2.26832	10.652	0.483033	0.29932	0.375175
263	Succinylcarnitine	Crohn's disease of colon	Weighted median	2.27734	12.1367	0.427319	0.335016	0.379606
263	Succinylcarnitine	Crohn's disease of colon	Weighted mode	2.26265	13.5055	0.379076	0.411403	0.372396
263	Succinylcarnitine	Crohn's disease of colon	MR RAPS	2.27086	10.9178	0.472329	0.30596	0.376418
264	Tryptophan betaine	Crohn's disease of colon	MR RAPS	0.945536	2.14628	0.416553	0.893478	0.0523844
265	Cyclo(leu-pro)	Crohn's disease of colon	Inverse variance weighted (multiplicative random effects)	0.824204	1.93261	0.3515	0.656566	0.075286
265	Cyclo(leu-pro)	Crohn's disease of colon	MR Egger	3.76454	98.7339	0.143535	0.395537	1
265	Cyclo(leu-pro)	Crohn's disease of colon	Inverse variance weighted (fixed effects)	0.824204	1.74943	0.388305	0.614618	0.075286
265	Cyclo(leu-pro)	Crohn's disease of colon	Weighted median	0.81377	2.29897	0.288051	0.697332	0.0784241
265	Cyclo(leu-pro)	Crohn's disease of colon	Weighted mode	3.05529	17.9172	0.520994	0.239555	0.999759
265	Cyclo(leu-pro)	Crohn's disease of colon	MR RAPS	0.815406	1.78929	0.371592	0.61079	0.0779194
266	Chiro-inositol	Crohn's disease of colon	Inverse variance weighted (multiplicative random effects)	0.88007	1.05314	0.73544	0.163102	0.188848
266	Chiro-inositol	Crohn's disease of colon	MR Egger	0.670898	1.18041	0.381312	0.151031	0.838594
266	Chiro-inositol	Crohn's disease of colon	Inverse variance weighted (fixed effects)	0.88007	1.09056	0.710207	0.242947	0.188848
266	Chiro-inositol	Crohn's disease of colon	Weighted median	0.815855	1.0763	0.61843	0.149926	0.377907
266	Chiro-inositol	Crohn's disease of colon	Weighted mode	0.791695	1.08063	0.580012	0.169185	0.462279
266	Chiro-inositol	Crohn's disease of colon	MR RAPS	0.878385	1.10421	0.698742	0.266657	0.192879
267	5alpha-androstan-3beta,17beta-diol disulfate	Crohn's disease of colon	MR RAPS	1.1836	2.06241	0.679253	0.551894	0.0677891
268	4-androsten-3beta,17beta-diol disulfate 1*	Crohn's disease of colon	MR RAPS	0.902189	4.03575	0.201683	0.892876	0.0511471
269	4-androsten-3beta,17beta-diol disulfate 2*	Crohn's disease of colon	MR RAPS	0.120038	1.55655	0.00925705	0.104899	0.114535
270	2-hydroxyglutarate	Crohn's disease of colon	Inverse variance weighted (multiplicative random effects)	0.875858	1.54591	0.496229	0.647484	0.0556599
270	2-hydroxyglutarate	Crohn's disease of colon	MR Egger	0.62545	7.41133	0.0527823	0.684933	0.102871
270	2-hydroxyglutarate	Crohn's disease of colon	Inverse variance weighted (fixed effects)	0.875858	2.46671	0.310993	0.801885	0.0556599
270	2-hydroxyglutarate	Crohn's disease of colon	Weighted median	0.975182	3.43579	0.276786	0.968801	0.0502253
270	2-hydroxyglutarate	Crohn's disease of colon	Weighted mode	0.783359	4.45545	0.13773	0.788184	0.0673664
270	2-hydroxyglutarate	Crohn's disease of colon	MR RAPS	0.874541	2.6493	0.288688	0.812607	0.0557811
271	Ergothioneine	Crohn's disease of colon	Inverse variance weighted (multiplicative random effects)	1.27816	3.20559	0.509637	0.600871	0.100571
271	Ergothioneine	Crohn's disease of colon	MR Egger	0.89505	34007.1	2.36e-05	0.971219	0.0570688
271	Ergothioneine	Crohn's disease of colon	Inverse variance weighted (fixed effects)	1.27816	3.29558	0.495721	0.611554	0.100571
271	Ergothioneine	Crohn's disease of colon	Weighted median	1.39805	4.41113	0.443092	0.567621	0.155374
271	Ergothioneine	Crohn's disease of colon	Weighted mode	0.680489	2.21563	0.208999	0.588167	0.117522
271	Ergothioneine	Crohn's disease of colon	MR RAPS	1.29132	3.55274	0.469356	0.62051	0.105577
273	Phenylalanylphenylalanine	Crohn's disease of colon	Inverse variance weighted (multiplicative random effects)	0.313392	1.78544	0.0550085	0.191202	0.136094
273	Phenylalanylphenylalanine	Crohn's disease of colon	MR Egger	0.00381792	10.7105	1.36e-06	0.155292	0.235577
273	Phenylalanylphenylalanine	Crohn's disease of colon	Inverse variance weighted (fixed effects)	0.313392	1.56344	0.0628192	0.157066	0.136094
273	Phenylalanylphenylalanine	Crohn's disease of colon	Weighted median	0.261145	2.06604	0.0330085	0.203243	0.150176
273	Phenylalanylphenylalanine	Crohn's disease of colon	Weighted mode	0.113016	1.01965	0.0125266	0.147327	0.196139
273	Phenylalanylphenylalanine	Crohn's disease of colon	MR RAPS	0.306371	1.62858	0.0576348	0.165189	0.137921
274	Cis-4-decenoyl carnitine	Crohn's disease of colon	Inverse variance weighted (multiplicative random effects)	2.60357	3.40715	1.98952	3.12e-12	0.779677
274	Cis-4-decenoyl carnitine	Crohn's disease of colon	Inverse variance weighted (fixed effects)	2.60357	8.76234	0.773604	0.122244	0.779677
274	Cis-4-decenoyl carnitine	Crohn's disease of colon	MR RAPS	2.60402	8.90058	0.761851	0.126952	0.779904
275	15-methylpalmitate (isobar with 2-methylpalmitate)	Crohn's disease of colon	Inverse variance weighted (multiplicative random effects)	1.0391	3.35095	0.322213	0.948813	0.0503795
275	15-methylpalmitate (isobar with 2-methylpalmitate)	Crohn's disease of colon	MR Egger	2.38929	44.3076	0.128842	0.531459	0.532604
275	15-methylpalmitate (isobar with 2-methylpalmitate)	Crohn's disease of colon	Inverse variance weighted (fixed effects)	1.0391	3.88318	0.27805	0.95453	0.0503795
275	15-methylpalmitate (isobar with 2-methylpalmitate)	Crohn's disease of colon	Weighted median	0.986448	6.20363	0.156856	0.988395	0.0500456
275	15-methylpalmitate (isobar with 2-methylpalmitate)	Crohn's disease of colon	Weighted mode	6.53751	156.029	0.273918	0.266919	1
275	15-methylpalmitate (isobar with 2-methylpalmitate)	Crohn's disease of colon	MR RAPS	1.04098	4.14295	0.261561	0.954555	0.0504169
276	Glutamine	Crohn's disease of ileocolon	MR RAPS	1.16457	248.602	0.00545539	0.955601	0.0504331
277	Tryptophan	Crohn's disease of ileocolon	Inverse variance weighted (multiplicative random effects)	0.0810894	2.96367	0.0022187	0.171226	0.0957684
277	Tryptophan	Crohn's disease of ileocolon	MR Egger	1.4e-10	1880000000000	1.05e-32	0.35866	0.1045
277	Tryptophan	Crohn's disease of ileocolon	Inverse variance weighted (fixed effects)	0.0810894	1.52983	0.00429819	0.0936778	0.0957684
277	Tryptophan	Crohn's disease of ileocolon	Weighted median	0.0821945	6.55353	0.00103089	0.263369	0.095655
277	Tryptophan	Crohn's disease of ileocolon	Weighted mode	0.000228675	3.49063	1.5e-08	0.108687	0.104474
277	Tryptophan	Crohn's disease of ileocolon	MR RAPS	0.0728568	1.48643	0.00357104	0.0886852	0.0966176
279	Leucine	Crohn's disease of ileocolon	Inverse variance weighted (multiplicative random effects)	0.997272	16.4501	0.0604588	0.998476	0.0500003
279	Leucine	Crohn's disease of ileocolon	MR Egger	34315.9	981000000000000	1.2e-06	0.35905	1
279	Leucine	Crohn's disease of ileocolon	Inverse variance weighted (fixed effects)	0.997272	29.3078	0.0339347	0.998736	0.0500003
279	Leucine	Crohn's disease of ileocolon	Weighted median	1.62009	160.207	0.0163831	0.83691	0.0650656
279	Leucine	Crohn's disease of ileocolon	Weighted mode	3.0584	2333.06	0.00400924	0.748116	0.224976
279	Leucine	Crohn's disease of ileocolon	MR RAPS	0.997226	32.7977	0.030321	0.998756	0.0500003
281	Phenylalanine	Crohn's disease of ileocolon	MR RAPS	24.8907	134911	0.00459225	0.463689	1
282	Creatinine	Crohn's disease of ileocolon	MR RAPS	2287.71	6.40477e+08	0.00817145	0.226742	1
283	Lactate	Crohn's disease of ileocolon	Inverse variance weighted (multiplicative random effects)	1.3625	3.5968	0.516127	0.532265	0.0658291
283	Lactate	Crohn's disease of ileocolon	MR Egger	1.65922	837.247	0.00328815	0.856506	0.103183
283	Lactate	Crohn's disease of ileocolon	Inverse variance weighted (fixed effects)	1.3625	8.23702	0.225373	0.73616	0.0658291
283	Lactate	Crohn's disease of ileocolon	Weighted median	1.79406	16.5866	0.194051	0.606502	0.127827
283	Lactate	Crohn's disease of ileocolon	Weighted mode	1.91312	67.4504	0.0542623	0.730397	0.153674
283	Lactate	Crohn's disease of ileocolon	MR RAPS	1.36969	9.37119	0.200194	0.74849	0.0664684
284	3-hydroxybutyrate (BHBA)	Crohn's disease of ileocolon	Inverse variance weighted (multiplicative random effects)	1.07482	1.5205	0.759782	0.683484	0.0654685
284	3-hydroxybutyrate (BHBA)	Crohn's disease of ileocolon	MR Egger	1.07017	1.92945	0.593568	0.798409	0.0635897
284	3-hydroxybutyrate (BHBA)	Crohn's disease of ileocolon	Inverse variance weighted (fixed effects)	1.07482	1.51806	0.761005	0.68209	0.0654685
284	3-hydroxybutyrate (BHBA)	Crohn's disease of ileocolon	Weighted median	1.06098	1.81025	0.621837	0.828089	0.0602457
284	3-hydroxybutyrate (BHBA)	Crohn's disease of ileocolon	Weighted mode	1.10655	1.80414	0.678696	0.695408	0.0816175
284	3-hydroxybutyrate (BHBA)	Crohn's disease of ileocolon	MR RAPS	1.07839	1.54867	0.750915	0.682774	0.0669896
285	Arabinose	Crohn's disease of ileocolon	Inverse variance weighted (multiplicative random effects)	1.06372	1.95328	0.579277	0.842101	0.0516527
285	Arabinose	Crohn's disease of ileocolon	MR Egger	0.98927	6.96242	0.140562	0.98756	0.0500469
285	Arabinose	Crohn's disease of ileocolon	Inverse variance weighted (fixed effects)	1.06372	1.93599	0.584452	0.839788	0.0516527
285	Arabinose	Crohn's disease of ileocolon	Weighted median	1.01952	1.96553	0.528827	0.953966	0.0501551
285	Arabinose	Crohn's disease of ileocolon	Weighted mode	1.02805	1.94309	0.543923	0.937484	0.0503202
285	Arabinose	Crohn's disease of ileocolon	MR RAPS	1.06407	2.02163	0.560065	0.849581	0.0516712
286	Fructose	Crohn's disease of ileocolon	Inverse variance weighted (multiplicative random effects)	2.22645	69.4731	0.0713522	0.648408	0.228253
286	Fructose	Crohn's disease of ileocolon	MR Egger	204.164	4840000000000000	8.61e-12	0.593154	1
286	Fructose	Crohn's disease of ileocolon	Inverse variance weighted (fixed effects)	2.22645	18.0371	0.274825	0.453319	0.228253
286	Fructose	Crohn's disease of ileocolon	Weighted median	0.481453	9.11702	0.0254246	0.626175	0.0810412
286	Fructose	Crohn's disease of ileocolon	Weighted mode	0.352018	10.1173	0.012248	0.604295	0.0989793
286	Fructose	Crohn's disease of ileocolon	MR RAPS	2.39314	20.4622	0.279889	0.425459	0.280749
288	Pyruvate	Crohn's disease of ileocolon	Inverse variance weighted (multiplicative random effects)	0.477193	1.32675	0.171632	0.15617	0.195563
288	Pyruvate	Crohn's disease of ileocolon	MR Egger	0.0467356	0.984987	0.00221751	0.0513943	0.520569
288	Pyruvate	Crohn's disease of ileocolon	Inverse variance weighted (fixed effects)	0.477193	1.19918	0.189891	0.115569	0.195563
288	Pyruvate	Crohn's disease of ileocolon	Weighted median	0.259899	1.05957	0.0637497	0.060204	0.344101
288	Pyruvate	Crohn's disease of ileocolon	Weighted mode	0.149708	1.48448	0.0150979	0.132987	0.433441
288	Pyruvate	Crohn's disease of ileocolon	MR RAPS	0.455746	1.17808	0.176308	0.104851	0.20811
289	Uridine	Crohn's disease of ileocolon	Inverse variance weighted (multiplicative random effects)	2.01958	2800.2	0.00145657	0.848974	0.0883603
289	Uridine	Crohn's disease of ileocolon	MR Egger	41896582311	4.35e+27	4.03e-07	0.226909	1
289	Uridine	Crohn's disease of ileocolon	Inverse variance weighted (fixed effects)	2.01958	80.1509	0.0508876	0.708211	0.0883603
289	Uridine	Crohn's disease of ileocolon	Weighted median	1.34	275.698	0.00651288	0.914242	0.0542014
289	Uridine	Crohn's disease of ileocolon	Weighted mode	65.6195	3.40576e+06	0.00126431	0.5289	1
289	Uridine	Crohn's disease of ileocolon	MR RAPS	2.12759	85.9751	0.0526505	0.689126	0.097102
290	Linoleate (18:2n6)	Crohn's disease of ileocolon	Inverse variance weighted (multiplicative random effects)	3.54402	20.2366	0.620661	0.154617	0.929064
290	Linoleate (18:2n6)	Crohn's disease of ileocolon	MR Egger	2812.01	2.45312e+06	3.2234	0.0258213	1
290	Linoleate (18:2n6)	Crohn's disease of ileocolon	Inverse variance weighted (fixed effects)	3.54402	14.825	0.847224	0.0831081	0.929064
290	Linoleate (18:2n6)	Crohn's disease of ileocolon	Weighted median	2.74551	24.7272	0.304838	0.367785	0.648195
290	Linoleate (18:2n6)	Crohn's disease of ileocolon	Weighted mode	1.26869	46.655	0.0344998	0.898882	0.0649985
290	Linoleate (18:2n6)	Crohn's disease of ileocolon	MR RAPS	3.81573	16.9283	0.860089	0.0781169	0.967484
291	Allantoin	Crohn's disease of ileocolon	Inverse variance weighted (multiplicative random effects)	0.677572	1.49979	0.306113	0.336974	0.130898
291	Allantoin	Crohn's disease of ileocolon	MR Egger	0.979199	14.9195	0.0642669	0.986972	0.0503233
291	Allantoin	Crohn's disease of ileocolon	Inverse variance weighted (fixed effects)	0.677572	1.43518	0.319894	0.309394	0.130898
291	Allantoin	Crohn's disease of ileocolon	Weighted median	0.724641	2.36696	0.221848	0.593817	0.108498
291	Allantoin	Crohn's disease of ileocolon	Weighted mode	0.735645	2.4675	0.219321	0.627341	0.103808
291	Allantoin	Crohn's disease of ileocolon	MR RAPS	0.668205	1.48154	0.301373	0.321002	0.13581
293	Deoxycholate	Crohn's disease of ileocolon	MR RAPS	2.9098	18.2268	0.464534	0.253885	0.573755
294	Margarate (17:0)	Crohn's disease of ileocolon	MR RAPS	0.0479955	1.54441	0.00149155	0.086421	0.108612
295	Inosine	Crohn's disease of ileocolon	MR RAPS	1.10201	2.74929	0.441722	0.835035	0.0563359
296	Isoleucine	Crohn's disease of ileocolon	Inverse variance weighted (multiplicative random effects)	1.81185	8.20081	0.4003	0.440395	0.128787
296	Isoleucine	Crohn's disease of ileocolon	MR Egger	6.86687	792.337	0.0595124	0.403222	0.999994
296	Isoleucine	Crohn's disease of ileocolon	Inverse variance weighted (fixed effects)	1.81185	12.0775	0.271811	0.539158	0.128787
296	Isoleucine	Crohn's disease of ileocolon	Weighted median	2.45677	33.3249	0.181118	0.499259	0.309679
296	Isoleucine	Crohn's disease of ileocolon	Weighted mode	2.20638	52.6041	0.0925424	0.63143	0.227526
296	Isoleucine	Crohn's disease of ileocolon	MR RAPS	1.83538	13.8055	0.244006	0.555289	0.133543
297	Threonine	Crohn's disease of ileocolon	Inverse variance weighted (multiplicative random effects)	1.61354	8.57175	0.303733	0.574457	0.129045
297	Threonine	Crohn's disease of ileocolon	MR Egger	0.000493433	0.395364	6.16e-07	0.0305085	0.269464
297	Threonine	Crohn's disease of ileocolon	Inverse variance weighted (fixed effects)	1.61354	7.09726	0.366834	0.526699	0.129045
297	Threonine	Crohn's disease of ileocolon	Weighted median	1.26241	11.0559	0.144147	0.833297	0.0640944
297	Threonine	Crohn's disease of ileocolon	Weighted mode	1.2829	26.9059	0.0611697	0.875198	0.0663991
297	Threonine	Crohn's disease of ileocolon	MR RAPS	1.64978	7.80182	0.348862	0.527679	0.138916
298	Tyrosine	Crohn's disease of ileocolon	Inverse variance weighted (multiplicative random effects)	0.952589	204.825	0.00443025	0.985858	0.0500738
298	Tyrosine	Crohn's disease of ileocolon	MR Egger	2970382850	7.13e+70	1.24e-52	0.62683	1
298	Tyrosine	Crohn's disease of ileocolon	Inverse variance weighted (fixed effects)	0.952589	32.1076	0.0282621	0.978409	0.0500738
298	Tyrosine	Crohn's disease of ileocolon	Weighted median	7.92412	837.937	0.074936	0.384074	0.98498
298	Tyrosine	Crohn's disease of ileocolon	Weighted mode	15.4752	4921.3	0.0486626	0.449822	1
298	Tyrosine	Crohn's disease of ileocolon	MR RAPS	0.950773	33.8253	0.0267247	0.977901	0.0500796
299	Lysine	Crohn's disease of ileocolon	MR RAPS	0.235838	28.0811	0.00198068	0.553592	0.0616194
300	Methionine	Crohn's disease of ileocolon	MR RAPS	12.343	64612.6	0.00235787	0.565143	0.960474
301	Malate	Crohn's disease of ileocolon	MR RAPS	0.911832	49.4913	0.0167996	0.963873	0.0502327
303	Nonadecanoate (19:0)	Crohn's disease of ileocolon	MR RAPS	0.00765816	2.52324	2.32e-05	0.0995381	0.0740624
304	Stearate (18:0)	Crohn's disease of ileocolon	Inverse variance weighted (multiplicative random effects)	0.124144	15.8189	0.000974266	0.398915	0.090315
304	Stearate (18:0)	Crohn's disease of ileocolon	Inverse variance weighted (fixed effects)	0.124144	3.80893	0.00404621	0.232327	0.090315
304	Stearate (18:0)	Crohn's disease of ileocolon	MR RAPS	0.118369	3.99411	0.00350798	0.234583	0.0908636
305	Oleate (18:1n9)	Crohn's disease of ileocolon	MR RAPS	2.62558	311.815	0.0221082	0.692065	0.111917
306	Pentadecanoate (15:0)	Crohn's disease of ileocolon	MR RAPS	2.36746	580.842	0.00964954	0.758865	0.0814229
307	Myristate (14:0)	Crohn's disease of ileocolon	Inverse variance weighted (multiplicative random effects)	0.97284	2.03795	0.464397	0.941819	0.0503324
307	Myristate (14:0)	Crohn's disease of ileocolon	MR Egger	1.81713	10.7917	0.305973	0.492822	0.365476
307	Myristate (14:0)	Crohn's disease of ileocolon	Inverse variance weighted (fixed effects)	0.97284	2.44774	0.38665	0.953357	0.0503324
307	Myristate (14:0)	Crohn's disease of ileocolon	Weighted median	1.32446	4.73791	0.370248	0.665655	0.098443
307	Myristate (14:0)	Crohn's disease of ileocolon	Weighted mode	1.51411	7.29569	0.314231	0.610781	0.174334
307	Myristate (14:0)	Crohn's disease of ileocolon	MR RAPS	0.972205	2.59359	0.36443	0.955098	0.0503481
308	Pipecolate	Crohn's disease of ileocolon	MR RAPS	9.22175	136.165	0.62454	0.105813	1
309	Ornithine	Crohn's disease of ileocolon	Inverse variance weighted (multiplicative random effects)	0.242381	0.615662	0.0954235	0.00288369	0.10727
309	Ornithine	Crohn's disease of ileocolon	MR Egger	0.0553966	54.6394	5.62e-05	0.328161	0.140401
309	Ornithine	Crohn's disease of ileocolon	Inverse variance weighted (fixed effects)	0.242381	1.86986	0.0314187	0.173958	0.10727
309	Ornithine	Crohn's disease of ileocolon	Weighted median	0.183821	2.31741	0.014581	0.190199	0.116785
309	Ornithine	Crohn's disease of ileocolon	Weighted mode	0.154382	2.45619	0.00970353	0.25626	0.121863
309	Ornithine	Crohn's disease of ileocolon	MR RAPS	0.241729	2.16709	0.0269638	0.204482	0.107372
310	5-oxoproline	Crohn's disease of ileocolon	MR RAPS	0.541427	3.39373	0.086378	0.512358	0.0795389
312	4-acetamidobutanoate	Crohn's disease of ileocolon	Inverse variance weighted (multiplicative random effects)	0.444423	3.59208	0.0549852	0.446872	0.079073
312	4-acetamidobutanoate	Crohn's disease of ileocolon	Inverse variance weighted (fixed effects)	0.444423	3.74257	0.0527743	0.455673	0.079073
312	4-acetamidobutanoate	Crohn's disease of ileocolon	MR RAPS	0.443157	3.81252	0.0515113	0.458584	0.0792082
313	Alpha-tocopherol	Crohn's disease of ileocolon	Inverse variance weighted (multiplicative random effects)	0.944433	1.904	0.468463	0.873023	0.0509455
313	Alpha-tocopherol	Crohn's disease of ileocolon	MR Egger	1.06007	30.7452	0.0365504	0.96925	0.0511036
313	Alpha-tocopherol	Crohn's disease of ileocolon	Inverse variance weighted (fixed effects)	0.944433	2.88555	0.30911	0.920085	0.0509455
313	Alpha-tocopherol	Crohn's disease of ileocolon	Weighted median	0.985343	4.28062	0.226813	0.984281	0.0500657
313	Alpha-tocopherol	Crohn's disease of ileocolon	Weighted mode	0.902995	7.67656	0.106219	0.927847	0.0528864
313	Alpha-tocopherol	Crohn's disease of ileocolon	MR RAPS	0.943229	3.09296	0.287647	0.923154	0.050987
314	Citrate	Crohn's disease of ileocolon	Inverse variance weighted (multiplicative random effects)	1.66981	51.3677	0.0542805	0.769298	0.0894127
314	Citrate	Crohn's disease of ileocolon	MR Egger	344088	22688568085	5.21834	0.041831	1
314	Citrate	Crohn's disease of ileocolon	Inverse variance weighted (fixed effects)	1.66981	17.8864	0.155887	0.67173	0.0894127
314	Citrate	Crohn's disease of ileocolon	Weighted median	0.239237	6.55367	0.00873318	0.397072	0.102014
314	Citrate	Crohn's disease of ileocolon	Weighted mode	0.124257	20.871	0.000739777	0.461216	0.119554
314	Citrate	Crohn's disease of ileocolon	MR RAPS	1.71541	19.1434	0.153715	0.661048	0.0950659
315	Glycerate	Crohn's disease of ileocolon	Inverse variance weighted (multiplicative random effects)	0.402767	1.15195	0.140823	0.0898555	0.110895
315	Glycerate	Crohn's disease of ileocolon	MR Egger	0.298397	53.3754	0.0016682	0.615936	0.134902
315	Glycerate	Crohn's disease of ileocolon	Inverse variance weighted (fixed effects)	0.402767	1.89098	0.0857871	0.249093	0.110895
315	Glycerate	Crohn's disease of ileocolon	Weighted median	0.375468	2.87882	0.0489701	0.345901	0.116768
315	Glycerate	Crohn's disease of ileocolon	Weighted mode	0.333804	5.46818	0.0203769	0.459614	0.126285
315	Glycerate	Crohn's disease of ileocolon	MR RAPS	0.395459	2.06964	0.0755629	0.271934	0.112439
316	Guanosine	Crohn's disease of ileocolon	Inverse variance weighted (multiplicative random effects)	1.16252	2.20917	0.611749	0.645707	0.0968985
316	Guanosine	Crohn's disease of ileocolon	MR Egger	1.54665	11.6659	0.205054	0.64497	0.564939
316	Guanosine	Crohn's disease of ileocolon	Inverse variance weighted (fixed effects)	1.16252	1.84104	0.734073	0.520861	0.0968985
316	Guanosine	Crohn's disease of ileocolon	Weighted median	1.29978	2.53636	0.666084	0.442071	0.214329
316	Guanosine	Crohn's disease of ileocolon	Weighted mode	1.44872	3.70208	0.56692	0.455033	0.414414
316	Guanosine	Crohn's disease of ileocolon	MR RAPS	1.17629	1.89479	0.73024	0.50445	0.105362
317	N-acetylalanine	Crohn's disease of ileocolon	MR RAPS	0.00527317	238.735	1.16e-07	0.337582	0.0553859
319	Ursodeoxycholate	Crohn's disease of ileocolon	Inverse variance weighted (multiplicative random effects)	1.25467	1.70245	0.924669	0.145111	0.155322
319	Ursodeoxycholate	Crohn's disease of ileocolon	MR Egger	1.04287	2.20957	0.492214	0.901041	0.0528682
319	Ursodeoxycholate	Crohn's disease of ileocolon	Inverse variance weighted (fixed effects)	1.25467	1.87972	0.837468	0.271328	0.155322
319	Ursodeoxycholate	Crohn's disease of ileocolon	Weighted median	1.19776	2.02454	0.708619	0.500418	0.112702
319	Ursodeoxycholate	Crohn's disease of ileocolon	Weighted mode	1.17533	1.9742	0.699724	0.558453	0.0990288
319	Ursodeoxycholate	Crohn's disease of ileocolon	MR RAPS	1.26017	1.95521	0.812207	0.302135	0.160042
320	Arginine	Crohn's disease of ileocolon	Inverse variance weighted (multiplicative random effects)	2.69642	11.6952	0.62168	0.185158	0.812905
320	Arginine	Crohn's disease of ileocolon	MR Egger	1.16406	177.714	0.00762479	0.949966	0.058751
320	Arginine	Crohn's disease of ileocolon	Inverse variance weighted (fixed effects)	2.69642	9.05881	0.802606	0.108638	0.812905
320	Arginine	Crohn's disease of ileocolon	Weighted median	1.40868	8.40162	0.236189	0.706856	0.105418
320	Arginine	Crohn's disease of ileocolon	Weighted mode	1.40252	25.6864	0.0765797	0.822352	0.103726
320	Arginine	Crohn's disease of ileocolon	MR RAPS	2.90602	10.3297	0.817542	0.0992165	0.893185
321	Ascorbate (Vitamin C)	Crohn's disease of ileocolon	Inverse variance weighted (multiplicative random effects)	0.988116	1.36318	0.716246	0.941947	0.0508745
321	Ascorbate (Vitamin C)	Crohn's disease of ileocolon	MR Egger	0.91146	2.25915	0.367731	0.827976	0.0998004
321	Ascorbate (Vitamin C)	Crohn's disease of ileocolon	Inverse variance weighted (fixed effects)	0.988116	1.32265	0.738193	0.93595	0.0508745
321	Ascorbate (Vitamin C)	Crohn's disease of ileocolon	Weighted median	1.05772	1.64641	0.679518	0.803705	0.0708432
321	Ascorbate (Vitamin C)	Crohn's disease of ileocolon	Weighted mode	1.0894	1.76617	0.67196	0.734351	0.100686
321	Ascorbate (Vitamin C)	Crohn's disease of ileocolon	MR RAPS	0.98758	1.3412	0.727196	0.93621	0.0509552
322	Heptanoate (7:0)	Crohn's disease of ileocolon	Inverse variance weighted (multiplicative random effects)	3.76699	75.7925	0.187224	0.386489	0.250064
322	Heptanoate (7:0)	Crohn's disease of ileocolon	Inverse variance weighted (fixed effects)	3.76699	280.669	0.0505584	0.546505	0.250064
322	Heptanoate (7:0)	Crohn's disease of ileocolon	MR RAPS	3.8053	349.004	0.0414904	0.562139	0.255869
323	Laurate (12:0)	Crohn's disease of ileocolon	Inverse variance weighted (multiplicative random effects)	0.152348	0.191601	0.121137	3.15e-58	0.0657776
323	Laurate (12:0)	Crohn's disease of ileocolon	Inverse variance weighted (fixed effects)	0.152348	12.1225	0.00191462	0.399434	0.0657776
323	Laurate (12:0)	Crohn's disease of ileocolon	MR RAPS	0.152334	15.6116	0.00148643	0.425673	0.0657781
324	Valine	Crohn's disease of ileocolon	MR RAPS	17.3834	47984.2	0.00629757	0.479945	1
325	Urea	Crohn's disease of ileocolon	Inverse variance weighted (multiplicative random effects)	1.94118	7.99448	0.471349	0.358368	0.194357
325	Urea	Crohn's disease of ileocolon	MR Egger	11.3905	4526.23	0.0286648	0.379777	1
325	Urea	Crohn's disease of ileocolon	Inverse variance weighted (fixed effects)	1.94118	10.8727	0.346575	0.450516	0.194357
325	Urea	Crohn's disease of ileocolon	Weighted median	3.84215	36.7892	0.401263	0.242894	0.915478
325	Urea	Crohn's disease of ileocolon	Weighted mode	4.03804	60.3009	0.270407	0.34122	0.946628
325	Urea	Crohn's disease of ileocolon	MR RAPS	1.97064	12.3072	0.31554	0.467948	0.203757
326	Cortisol	Crohn's disease of ileocolon	Inverse variance weighted (multiplicative random effects)	3.20023	13.2495	0.772974	0.108549	0.991614
326	Cortisol	Crohn's disease of ileocolon	MR Egger	0.420952	12.1682	0.0145626	0.576707	0.209614
326	Cortisol	Crohn's disease of ileocolon	Inverse variance weighted (fixed effects)	3.20023	9.49025	1.07916	0.0359617	0.991614
326	Cortisol	Crohn's disease of ileocolon	Weighted median	8.4444	44.2426	1.61175	0.0115738	1
326	Cortisol	Crohn's disease of ileocolon	Weighted mode	17.3646	998.717	0.301918	0.200687	1
326	Cortisol	Crohn's disease of ileocolon	MR RAPS	3.62013	11.2439	1.16555	0.0260857	0.999402
327	Cortisone	Crohn's disease of ileocolon	MR RAPS	14.985	10512.8	0.0213597	0.418147	1
328	Proline	Crohn's disease of ileocolon	MR RAPS	2.14014	14.5046	0.315774	0.435791	0.212906
329	Citrulline	Crohn's disease of ileocolon	Inverse variance weighted (multiplicative random effects)	0.495863	177.008	0.00138909	0.815053	0.0579107
329	Citrulline	Crohn's disease of ileocolon	MR Egger	5.3e-20	Inf	0	0.882603	0.0818404
329	Citrulline	Crohn's disease of ileocolon	Inverse variance weighted (fixed effects)	0.495863	21.5155	0.0114281	0.715365	0.0579107
329	Citrulline	Crohn's disease of ileocolon	Weighted median	1.06667	244.296	0.0046574	0.981427	0.0501366
329	Citrulline	Crohn's disease of ileocolon	Weighted mode	2.86269	3467.15	0.00236361	0.798871	0.161437
329	Citrulline	Crohn's disease of ileocolon	MR RAPS	0.47708	22.5168	0.0101082	0.706664	0.0585169
330	Biliverdin	Crohn's disease of ileocolon	MR RAPS	0.710148	1.23422	0.408607	0.224836	0.171492
331	Serotonin (5HT)	Crohn's disease of ileocolon	Inverse variance weighted (multiplicative random effects)	1.08891	2.1713	0.546091	0.808852	0.054305
331	Serotonin (5HT)	Crohn's disease of ileocolon	MR Egger	1.04973	4.32818	0.254597	0.942214	0.0513451
331	Serotonin (5HT)	Crohn's disease of ileocolon	Inverse variance weighted (fixed effects)	1.08891	2.27206	0.521874	0.820433	0.054305
331	Serotonin (5HT)	Crohn's disease of ileocolon	Weighted median	1.3139	3.54364	0.487161	0.589677	0.104884
331	Serotonin (5HT)	Crohn's disease of ileocolon	Weighted mode	1.21028	3.82453	0.382997	0.750266	0.0743159
331	Serotonin (5HT)	Crohn's disease of ileocolon	MR RAPS	1.09102	2.38373	0.499353	0.827069	0.0545119
332	Gamma-glutamylglutamine	Crohn's disease of ileocolon	Inverse variance weighted (multiplicative random effects)	1.07384	1.1753	0.981138	0.121959	0.0502898
332	Gamma-glutamylglutamine	Crohn's disease of ileocolon	Inverse variance weighted (fixed effects)	1.07384	19.8943	0.0579629	0.96185	0.0502898
332	Gamma-glutamylglutamine	Crohn's disease of ileocolon	MR RAPS	1.07384	21.5216	0.0535802	0.96285	0.0502898
333	Gamma-glutamyltyrosine	Crohn's disease of ileocolon	Inverse variance weighted (multiplicative random effects)	0.784877	36.5899	0.0168361	0.901653	0.0515287
333	Gamma-glutamyltyrosine	Crohn's disease of ileocolon	MR Egger	6.55e-34	2.53e+77	1.7e-144	0.419545	0.0841107
333	Gamma-glutamyltyrosine	Crohn's disease of ileocolon	Inverse variance weighted (fixed effects)	0.784877	28.2218	0.0218282	0.894564	0.0515287
333	Gamma-glutamyltyrosine	Crohn's disease of ileocolon	Weighted median	0.48188	45.536	0.00509944	0.753075	0.0589493
333	Gamma-glutamyltyrosine	Crohn's disease of ileocolon	Weighted mode	0.243245	66.8077	0.000885648	0.670572	0.0692876
333	Gamma-glutamyltyrosine	Crohn's disease of ileocolon	MR RAPS	0.780357	32.0513	0.0189995	0.895908	0.0515938
334	Hypoxanthine	Crohn's disease of ileocolon	MR RAPS	0.583947	12.8139	0.0266111	0.732811	0.0581066
335	Betaine	Crohn's disease of ileocolon	Inverse variance weighted (multiplicative random effects)	2.49966	5.57938	1.11989	0.0253246	0.247164
335	Betaine	Crohn's disease of ileocolon	Inverse variance weighted (fixed effects)	2.49966	26.4839	0.235928	0.446806	0.247164
335	Betaine	Crohn's disease of ileocolon	MR RAPS	2.49989	28.4921	0.21934	0.460511	0.247226
336	Xanthine	Crohn's disease of ileocolon	Inverse variance weighted (multiplicative random effects)	4.76834	367.528	0.0618647	0.481035	0.918902
336	Xanthine	Crohn's disease of ileocolon	MR Egger	137.459	2500000000000000	7.55e-12	0.613865	1
336	Xanthine	Crohn's disease of ileocolon	Inverse variance weighted (fixed effects)	4.76834	73.604	0.30891	0.263273	0.918902
336	Xanthine	Crohn's disease of ileocolon	Weighted median	19.7065	494.498	0.785335	0.0698272	1
336	Xanthine	Crohn's disease of ileocolon	Weighted mode	19.9194	611.089	0.649303	0.228889	1
336	Xanthine	Crohn's disease of ileocolon	MR RAPS	5.05639	87.5341	0.292081	0.265272	0.952787
337	Phosphate	Crohn's disease of ileocolon	Inverse variance weighted (multiplicative random effects)	7.71133	37.52	1.58488	0.0113909	0.999886
337	Phosphate	Crohn's disease of ileocolon	MR Egger	38.759	215275	0.00697833	0.309529	1
337	Phosphate	Crohn's disease of ileocolon	Inverse variance weighted (fixed effects)	7.71133	108.529	0.547912	0.130011	0.999886
337	Phosphate	Crohn's disease of ileocolon	Weighted median	7.67695	259.903	0.226759	0.256691	0.999868
337	Phosphate	Crohn's disease of ileocolon	Weighted mode	8.86984	466.999	0.168467	0.359492	1
337	Phosphate	Crohn's disease of ileocolon	MR RAPS	7.96993	140.167	0.453172	0.155917	0.999963
338	3-methoxytyrosine	Crohn's disease of ileocolon	Inverse variance weighted (multiplicative random effects)	1.34118	7.23377	0.248663	0.732789	0.0836614
338	3-methoxytyrosine	Crohn's disease of ileocolon	MR Egger	0.4468	214.933	0.000928802	0.779886	0.141483
338	3-methoxytyrosine	Crohn's disease of ileocolon	Inverse variance weighted (fixed effects)	1.34118	4.69324	0.383268	0.645988	0.0836614
338	3-methoxytyrosine	Crohn's disease of ileocolon	Weighted median	1.44049	10.9669	0.189207	0.724528	0.106625
338	3-methoxytyrosine	Crohn's disease of ileocolon	Weighted mode	0.274628	9.25011	0.00815346	0.486414	0.21008
338	3-methoxytyrosine	Crohn's disease of ileocolon	MR RAPS	1.38808	4.97843	0.387024	0.614798	0.0937357
339	Pelargonate (9:0)	Crohn's disease of ileocolon	MR RAPS	0.141981	234.728	8.59e-05	0.605645	0.0582162
340	Undecanoate (11:0)	Crohn's disease of ileocolon	Inverse variance weighted (multiplicative random effects)	1.56192	10.9451	0.222894	0.653505	0.104582
340	Undecanoate (11:0)	Crohn's disease of ileocolon	MR Egger	4.84698	414.226	0.056716	0.467251	0.997521
340	Undecanoate (11:0)	Crohn's disease of ileocolon	Inverse variance weighted (fixed effects)	1.56192	8.77083	0.278148	0.612498	0.104582
340	Undecanoate (11:0)	Crohn's disease of ileocolon	Weighted median	1.86439	21.5099	0.161599	0.617603	0.181945
340	Undecanoate (11:0)	Crohn's disease of ileocolon	Weighted mode	3.75372	88.6914	0.15887	0.422489	0.919902
340	Undecanoate (11:0)	Crohn's disease of ileocolon	MR RAPS	1.58851	9.68517	0.260539	0.615837	0.109989
342	Taurodeoxycholate	Crohn's disease of ileocolon	Inverse variance weighted (multiplicative random effects)	1.36388	2.11677	0.878782	0.166417	0.474023
342	Taurodeoxycholate	Crohn's disease of ileocolon	MR Egger	1.78211	9.43899	0.336467	0.455591	0.982486
342	Taurodeoxycholate	Crohn's disease of ileocolon	Inverse variance weighted (fixed effects)	1.36388	2.01923	0.921231	0.121099	0.474023
342	Taurodeoxycholate	Crohn's disease of ileocolon	Weighted median	1.17807	2.08127	0.666826	0.572487	0.152958
342	Taurodeoxycholate	Crohn's disease of ileocolon	Weighted mode	1.01265	3.03119	0.3383	0.982567	0.0504984
342	Taurodeoxycholate	Crohn's disease of ileocolon	MR RAPS	1.39119	2.09622	0.923284	0.114471	0.530589
343	Glycerol	Crohn's disease of ileocolon	Inverse variance weighted (multiplicative random effects)	2.67705	6.43256	1.11411	0.027694	0.779889
343	Glycerol	Crohn's disease of ileocolon	MR Egger	1.55806	10.1512	0.239139	0.618513	0.148566
343	Glycerol	Crohn's disease of ileocolon	Inverse variance weighted (fixed effects)	2.67705	6.86406	1.04408	0.0403854	0.779889
343	Glycerol	Crohn's disease of ileocolon	Weighted median	2.10988	8.13196	0.547418	0.278072	0.438772
343	Glycerol	Crohn's disease of ileocolon	Weighted mode	2.05649	6.70387	0.630852	0.253098	0.404822
343	Glycerol	Crohn's disease of ileocolon	MR RAPS	2.74417	7.71427	0.976171	0.0555863	0.811085
344	Kynurenine	Crohn's disease of ileocolon	Inverse variance weighted (multiplicative random effects)	17.3065	1865.6	0.160546	0.232486	1
344	Kynurenine	Crohn's disease of ileocolon	Inverse variance weighted (fixed effects)	17.3065	542.143	0.552465	0.104727	1
344	Kynurenine	Crohn's disease of ileocolon	MR RAPS	18.0915	629.03	0.520331	0.10978	1
345	Mannitol	Crohn's disease of ileocolon	Inverse variance weighted (multiplicative random effects)	1.14158	1.64051	0.794392	0.474138	0.129691
345	Mannitol	Crohn's disease of ileocolon	MR Egger	0.678317	2.36004	0.19496	0.50542	0.462854
345	Mannitol	Crohn's disease of ileocolon	Inverse variance weighted (fixed effects)	1.14158	1.62592	0.801518	0.463047	0.129691
345	Mannitol	Crohn's disease of ileocolon	Weighted median	0.917571	1.49735	0.562285	0.730624	0.076503
345	Mannitol	Crohn's disease of ileocolon	Weighted mode	0.876932	1.4775	0.52048	0.632382	0.109981
345	Mannitol	Crohn's disease of ileocolon	MR RAPS	1.14743	1.66933	0.7887	0.472141	0.136595
346	Glycerol 3-phosphate (G3P)	Crohn's disease of ileocolon	Inverse variance weighted (multiplicative random effects)	0.790091	5.01934	0.124368	0.80277	0.0572985
346	Glycerol 3-phosphate (G3P)	Crohn's disease of ileocolon	MR Egger	0.0452354	2.82462	0.000724432	0.127841	0.210916
346	Glycerol 3-phosphate (G3P)	Crohn's disease of ileocolon	Inverse variance weighted (fixed effects)	0.790091	4.02435	0.155117	0.776672	0.0572985
346	Glycerol 3-phosphate (G3P)	Crohn's disease of ileocolon	Weighted median	0.164519	1.54236	0.0175487	0.113988	0.172073
346	Glycerol 3-phosphate (G3P)	Crohn's disease of ileocolon	Weighted mode	0.182941	2.51529	0.0133056	0.2397	0.16656
346	Glycerol 3-phosphate (G3P)	Crohn's disease of ileocolon	MR RAPS	0.777905	4.18632	0.144551	0.769911	0.058176
348	Carnitine	Crohn's disease of ileocolon	Inverse variance weighted (multiplicative random effects)	1.02323	10.7618	0.097289	0.984736	0.0500607
348	Carnitine	Crohn's disease of ileocolon	MR Egger	0.623679	162.971	0.00238678	0.859697	0.0661679
348	Carnitine	Crohn's disease of ileocolon	Inverse variance weighted (fixed effects)	1.02323	8.92559	0.117304	0.983417	0.0500607
348	Carnitine	Crohn's disease of ileocolon	Weighted median	1.53552	35.9535	0.0655799	0.789801	0.0826961
348	Carnitine	Crohn's disease of ileocolon	Weighted mode	1.32186	44.4433	0.0393157	0.878303	0.0617003
348	Carnitine	Crohn's disease of ileocolon	MR RAPS	1.02368	9.24462	0.113355	0.98337	0.0500631
349	Choline	Crohn's disease of ileocolon	Inverse variance weighted (multiplicative random effects)	0.832144	6.82614	0.101443	0.86412	0.0521917
349	Choline	Crohn's disease of ileocolon	MR Egger	1.41569	1359.17	0.00147457	0.915608	0.0634495
349	Choline	Crohn's disease of ileocolon	Inverse variance weighted (fixed effects)	0.832144	7.99406	0.0866224	0.873523	0.0521917
349	Choline	Crohn's disease of ileocolon	Weighted median	1.30839	33.1411	0.0516545	0.87051	0.0573828
349	Choline	Crohn's disease of ileocolon	Weighted mode	2.75262	310.475	0.0244042	0.680459	0.301823
349	Choline	Crohn's disease of ileocolon	MR RAPS	0.82668	8.92697	0.0765544	0.875412	0.0523371
350	N-acetylornithine	Crohn's disease of ileocolon	MR RAPS	1.12774	1.78373	0.713005	0.607301	0.0860459
351	N1-methyladenosine	Crohn's disease of ileocolon	MR RAPS	0.0340829	4450.01	2.61e-07	0.573965	0.054257
352	3-methyl-2-oxovalerate	Crohn's disease of ileocolon	Inverse variance weighted (multiplicative random effects)	1.80316	26.3009	0.123623	0.66636	0.0744493
352	3-methyl-2-oxovalerate	Crohn's disease of ileocolon	Inverse variance weighted (fixed effects)	1.80316	58.5451	0.0555367	0.739876	0.0744493
352	3-methyl-2-oxovalerate	Crohn's disease of ileocolon	MR RAPS	1.81074	65.5382	0.0500282	0.745746	0.0749178
353	3-methylhistidine	Crohn's disease of ileocolon	Inverse variance weighted (multiplicative random effects)	1.0297	1.61312	0.657288	0.898317	0.0516901
353	3-methylhistidine	Crohn's disease of ileocolon	MR Egger	1.60281	8.06975	0.31835	0.507069	0.690943
353	3-methylhistidine	Crohn's disease of ileocolon	Inverse variance weighted (fixed effects)	1.0297	1.70287	0.622644	0.909212	0.0516901
353	3-methylhistidine	Crohn's disease of ileocolon	Weighted median	0.98163	1.88732	0.510565	0.955668	0.0506465
353	3-methylhistidine	Crohn's disease of ileocolon	Weighted mode	0.991408	2.00488	0.490248	0.981618	0.0501414
353	3-methylhistidine	Crohn's disease of ileocolon	MR RAPS	1.03041	1.76113	0.602876	0.912778	0.0517716
354	3-phenylpropionate (hydrocinnamate)	Crohn's disease of ileocolon	MR RAPS	3.14395	31.4951	0.313839	0.329906	0.474253
355	Phenylacetate	Crohn's disease of ileocolon	Inverse variance weighted (multiplicative random effects)	1.74455	2.75374	1.10521	0.0168701	0.34592
355	Phenylacetate	Crohn's disease of ileocolon	MR Egger	1.54284	5.24375	0.453941	0.434078	0.207102
355	Phenylacetate	Crohn's disease of ileocolon	Inverse variance weighted (fixed effects)	1.74455	3.61203	0.84259	0.133943	0.34592
355	Phenylacetate	Crohn's disease of ileocolon	Weighted median	1.71589	4.23234	0.695662	0.241128	0.324089
355	Phenylacetate	Crohn's disease of ileocolon	Weighted mode	1.71825	4.07835	0.723919	0.259336	0.325867
355	Phenylacetate	Crohn's disease of ileocolon	MR RAPS	1.75104	3.91829	0.782518	0.172811	0.350937
356	Glycerophosphorylcholine (GPC)	Crohn's disease of ileocolon	Inverse variance weighted (multiplicative random effects)	0.600223	1.02676	0.350878	0.0623799	0.15849
356	Glycerophosphorylcholine (GPC)	Crohn's disease of ileocolon	MR Egger	0.684714	1.60376	0.292335	0.360429	0.11654
356	Glycerophosphorylcholine (GPC)	Crohn's disease of ileocolon	Inverse variance weighted (fixed effects)	0.600223	1.05092	0.342812	0.0740662	0.15849
356	Glycerophosphorylcholine (GPC)	Crohn's disease of ileocolon	Weighted median	0.696008	1.49131	0.324833	0.351296	0.111738
356	Glycerophosphorylcholine (GPC)	Crohn's disease of ileocolon	Weighted mode	0.677281	1.32666	0.345764	0.272696	0.119803
356	Glycerophosphorylcholine (GPC)	Crohn's disease of ileocolon	MR RAPS	0.588791	1.10294	0.314319	0.0981199	0.164983
357	Aspartate	Crohn's disease of ileocolon	Inverse variance weighted (multiplicative random effects)	1.07566	7.72503	0.149778	0.942199	0.0513899
357	Aspartate	Crohn's disease of ileocolon	MR Egger	0.0141778	11.8264	1.7e-05	0.181657	0.304531
357	Aspartate	Crohn's disease of ileocolon	Inverse variance weighted (fixed effects)	1.07566	4.6593	0.248329	0.922319	0.0513899
357	Aspartate	Crohn's disease of ileocolon	Weighted median	1.37342	11.6676	0.161667	0.771297	0.0843663
357	Aspartate	Crohn's disease of ileocolon	Weighted mode	0.194325	2.45788	0.0153637	0.295084	0.218761
357	Aspartate	Crohn's disease of ileocolon	MR RAPS	1.08246	4.91121	0.238582	0.918202	0.0516513
358	X-04499--3,4-dihydroxybutyrate	Crohn's disease of ileocolon	MR RAPS	19.8653	1016.57	0.388197	0.136564	1
359	Dihomo-linoleate (20:2n6)	Crohn's disease of ileocolon	Inverse variance weighted (multiplicative random effects)	2.23378	5.83934	0.854512	0.101149	0.542604
359	Dihomo-linoleate (20:2n6)	Crohn's disease of ileocolon	MR Egger	1.86524	190.552	0.0182581	0.765064	0.305144
359	Dihomo-linoleate (20:2n6)	Crohn's disease of ileocolon	Inverse variance weighted (fixed effects)	2.23378	7.63188	0.653808	0.199805	0.542604
359	Dihomo-linoleate (20:2n6)	Crohn's disease of ileocolon	Weighted median	2.23192	12.253	0.406552	0.355448	0.541367
359	Dihomo-linoleate (20:2n6)	Crohn's disease of ileocolon	Weighted mode	2.59983	19.1364	0.353208	0.375625	0.76498
359	Dihomo-linoleate (20:2n6)	Crohn's disease of ileocolon	MR RAPS	2.26767	8.50655	0.604515	0.22482	0.565077
360	2-hydroxystearate	Crohn's disease of ileocolon	Inverse variance weighted (multiplicative random effects)	0.848634	2.19478	0.328132	0.734952	0.0567327
360	2-hydroxystearate	Crohn's disease of ileocolon	MR Egger	0.814184	5.1323	0.129161	0.821225	0.0601709
360	2-hydroxystearate	Crohn's disease of ileocolon	Inverse variance weighted (fixed effects)	0.848634	2.35217	0.306176	0.752347	0.0567327
360	2-hydroxystearate	Crohn's disease of ileocolon	Weighted median	0.741509	4.02024	0.136767	0.728768	0.0698067
360	2-hydroxystearate	Crohn's disease of ileocolon	Weighted mode	0.75531	3.53287	0.161481	0.723941	0.067725
360	2-hydroxystearate	Crohn's disease of ileocolon	MR RAPS	0.845315	2.47752	0.288417	0.759372	0.0570328
361	Indolelactate	Crohn's disease of ileocolon	MR RAPS	0.519222	27.4112	0.00983508	0.746029	0.0583565
362	Glycylvaline	Crohn's disease of ileocolon	Inverse variance weighted (multiplicative random effects)	1.72067	3.46241	0.855103	0.1282	0.548829
362	Glycylvaline	Crohn's disease of ileocolon	MR Egger	5.36333	2333.59	0.0123267	0.51655	1
362	Glycylvaline	Crohn's disease of ileocolon	Inverse variance weighted (fixed effects)	1.72067	3.42899	0.863438	0.122919	0.548829
362	Glycylvaline	Crohn's disease of ileocolon	Weighted median	1.48226	3.83757	0.572525	0.417415	0.286249
362	Glycylvaline	Crohn's disease of ileocolon	Weighted mode	0.888179	3.67003	0.214947	0.876291	0.0621276
362	Glycylvaline	Crohn's disease of ileocolon	MR RAPS	1.76583	3.68534	0.846099	0.129823	0.599875
363	Gamma-glutamylleucine	Crohn's disease of ileocolon	Inverse variance weighted (multiplicative random effects)	1.60713	6.48877	0.398052	0.50521	0.184709
363	Gamma-glutamylleucine	Crohn's disease of ileocolon	MR Egger	0.104406	1.94541	0.00560323	0.1255	0.350627
363	Gamma-glutamylleucine	Crohn's disease of ileocolon	Inverse variance weighted (fixed effects)	1.60713	5.14225	0.502284	0.423964	0.184709
363	Gamma-glutamylleucine	Crohn's disease of ileocolon	Weighted median	3.34693	21.1884	0.528682	0.199473	0.984117
363	Gamma-glutamylleucine	Crohn's disease of ileocolon	Weighted mode	2.57879	75.7365	0.0878067	0.586835	0.785675
363	Gamma-glutamylleucine	Crohn's disease of ileocolon	MR RAPS	1.67643	5.58192	0.503484	0.399858	0.218013
364	Eicosapentaenoate (EPA; 20:5n3)	Crohn's disease of ileocolon	MR RAPS	0.349475	2.10878	0.0579164	0.251626	0.105781
365	Estrone 3-sulfate	Crohn's disease of ileocolon	MR RAPS	0.948134	1.50695	0.596543	0.821752	0.054405
366	Glycocholate	Crohn's disease of ileocolon	Inverse variance weighted (multiplicative random effects)	1.29144	2.33133	0.715394	0.396072	0.170036
366	Glycocholate	Crohn's disease of ileocolon	MR Egger	0.765099	3.00794	0.194611	0.660038	0.127541
366	Glycocholate	Crohn's disease of ileocolon	Inverse variance weighted (fixed effects)	1.29144	2.34456	0.711357	0.400569	0.170036
366	Glycocholate	Crohn's disease of ileocolon	Weighted median	0.750949	1.71146	0.329499	0.495568	0.137455
366	Glycocholate	Crohn's disease of ileocolon	Weighted mode	0.739878	1.8096	0.302508	0.530228	0.145645
366	Glycocholate	Crohn's disease of ileocolon	MR RAPS	1.3194	2.48288	0.701133	0.390183	0.194832
367	Glycodeoxycholate	Crohn's disease of ileocolon	Inverse variance weighted (multiplicative random effects)	0.946083	1.33784	0.669045	0.753874	0.0605715
367	Glycodeoxycholate	Crohn's disease of ileocolon	MR Egger	0.567884	5.53597	0.0582539	0.557718	0.682188
367	Glycodeoxycholate	Crohn's disease of ileocolon	Inverse variance weighted (fixed effects)	0.946083	1.34461	0.665674	0.757299	0.0605715
367	Glycodeoxycholate	Crohn's disease of ileocolon	Weighted median	1.1597	1.83966	0.731059	0.529123	0.145807
367	Glycodeoxycholate	Crohn's disease of ileocolon	Weighted mode	1.23871	2.19625	0.698649	0.496651	0.267715
367	Glycodeoxycholate	Crohn's disease of ileocolon	MR RAPS	0.943796	1.36677	0.651721	0.759465	0.0614938
368	Taurochenodeoxycholate	Crohn's disease of ileocolon	Inverse variance weighted (multiplicative random effects)	1.08006	1.4707	0.793178	0.624875	0.0671554
368	Taurochenodeoxycholate	Crohn's disease of ileocolon	MR Egger	1.42622	2.93284	0.693561	0.301023	0.53475
368	Taurochenodeoxycholate	Crohn's disease of ileocolon	Inverse variance weighted (fixed effects)	1.08006	1.58926	0.734007	0.695938	0.0671554
368	Taurochenodeoxycholate	Crohn's disease of ileocolon	Weighted median	1.14282	1.90734	0.684748	0.609453	0.105539
368	Taurochenodeoxycholate	Crohn's disease of ileocolon	Weighted mode	1.17225	1.99182	0.689908	0.569839	0.131509
368	Taurochenodeoxycholate	Crohn's disease of ileocolon	MR RAPS	1.08135	1.63338	0.715888	0.710142	0.0677177
369	Taurocholate	Crohn's disease of ileocolon	Inverse variance weighted (multiplicative random effects)	1.18485	1.73774	0.807876	0.385338	0.257345
369	Taurocholate	Crohn's disease of ileocolon	MR Egger	1.28005	2.72643	0.600984	0.493984	0.507577
369	Taurocholate	Crohn's disease of ileocolon	Inverse variance weighted (fixed effects)	1.18485	1.62525	0.863794	0.29283	0.257345
369	Taurocholate	Crohn's disease of ileocolon	Weighted median	1.06161	1.714	0.657535	0.806755	0.0720257
369	Taurocholate	Crohn's disease of ileocolon	Weighted mode	1.03632	1.67737	0.640263	0.886778	0.0575961
369	Taurocholate	Crohn's disease of ileocolon	MR RAPS	1.19523	1.66792	0.856506	0.294198	0.281402
371	1-stearoylglycerophosphoinositol	Crohn's disease of ileocolon	Inverse variance weighted (multiplicative random effects)	0.679408	1.66252	0.277647	0.397213	0.0923983
371	1-stearoylglycerophosphoinositol	Crohn's disease of ileocolon	MR Egger	0.743709	30.5045	0.0181319	0.823407	0.0768747
371	1-stearoylglycerophosphoinositol	Crohn's disease of ileocolon	Inverse variance weighted (fixed effects)	0.679408	1.72551	0.267512	0.416314	0.0923983
371	1-stearoylglycerophosphoinositol	Crohn's disease of ileocolon	Weighted median	0.814934	2.38207	0.278799	0.708438	0.0639043
371	1-stearoylglycerophosphoinositol	Crohn's disease of ileocolon	Weighted mode	1.02238	3.11155	0.33593	0.971358	0.0502012
371	1-stearoylglycerophosphoinositol	Crohn's disease of ileocolon	MR RAPS	0.667638	1.81923	0.245016	0.429562	0.095641
372	Myo-inositol	Crohn's disease of ileocolon	Inverse variance weighted (multiplicative random effects)	16.246	1064.98	0.247827	0.191443	1
372	Myo-inositol	Crohn's disease of ileocolon	Inverse variance weighted (fixed effects)	16.246	456.265	0.578461	0.101355	1
372	Myo-inositol	Crohn's disease of ileocolon	MR RAPS	16.9614	536.229	0.536504	0.108139	1
373	Glucose	Crohn's disease of ileocolon	MR RAPS	0.424117	466.058	0.00038595	0.810254	0.0531824
374	1,5-anhydroglucitol (1,5-AG)	Crohn's disease of ileocolon	Inverse variance weighted (multiplicative random effects)	2.94639	4.74347	1.83014	8.68e-06	0.783614
374	1,5-anhydroglucitol (1,5-AG)	Crohn's disease of ileocolon	MR Egger	6.0843	71099.9	0.000520657	0.559153	1
374	1,5-anhydroglucitol (1,5-AG)	Crohn's disease of ileocolon	Inverse variance weighted (fixed effects)	2.94639	11.4987	0.754975	0.119846	0.783614
374	1,5-anhydroglucitol (1,5-AG)	Crohn's disease of ileocolon	Weighted median	3.12895	13.3116	0.735477	0.122562	0.852009
374	1,5-anhydroglucitol (1,5-AG)	Crohn's disease of ileocolon	Weighted mode	3.17474	16.6559	0.605131	0.305252	0.866639
374	1,5-anhydroglucitol (1,5-AG)	Crohn's disease of ileocolon	MR RAPS	2.94837	11.8099	0.736065	0.126716	0.78444
375	2-hydroxybutyrate (AHB)	Crohn's disease of ileocolon	Inverse variance weighted (multiplicative random effects)	1.2485	4.39405	0.354741	0.729563	0.0776139
375	2-hydroxybutyrate (AHB)	Crohn's disease of ileocolon	MR Egger	0.735389	21.0404	0.0257029	0.845378	0.0815596
375	2-hydroxybutyrate (AHB)	Crohn's disease of ileocolon	Inverse variance weighted (fixed effects)	1.2485	3.4755	0.448496	0.670913	0.0776139
375	2-hydroxybutyrate (AHB)	Crohn's disease of ileocolon	Weighted median	1.1016	4.74467	0.255765	0.896663	0.0545652
375	2-hydroxybutyrate (AHB)	Crohn's disease of ileocolon	Weighted mode	0.886104	5.31914	0.147614	0.896986	0.0557556
375	2-hydroxybutyrate (AHB)	Crohn's disease of ileocolon	MR RAPS	1.26306	3.68725	0.43266	0.669193	0.0809924
376	3-methyl-2-oxobutyrate	Crohn's disease of ileocolon	MR RAPS	6.65839	1380.54	0.0321136	0.486052	0.657146
377	1,6-anhydroglucose	Crohn's disease of ileocolon	MR RAPS	1.15021	6.60293	0.200364	0.875277	0.0537484
378	1-palmitoylglycerol (1-monopalmitin)	Crohn's disease of ileocolon	Inverse variance weighted (multiplicative random effects)	0.862731	1.56164	0.476618	0.62576	0.0554476
378	1-palmitoylglycerol (1-monopalmitin)	Crohn's disease of ileocolon	MR Egger	1.24326	102.634	0.0150603	0.91488	0.0671495
378	1-palmitoylglycerol (1-monopalmitin)	Crohn's disease of ileocolon	Inverse variance weighted (fixed effects)	0.862731	3.08534	0.241239	0.820345	0.0554476
378	1-palmitoylglycerol (1-monopalmitin)	Crohn's disease of ileocolon	Weighted median	0.938166	5.3597	0.164218	0.942773	0.0511015
378	1-palmitoylglycerol (1-monopalmitin)	Crohn's disease of ileocolon	Weighted mode	1.1955	7.52839	0.189845	0.852958	0.0610442
378	1-palmitoylglycerol (1-monopalmitin)	Crohn's disease of ileocolon	MR RAPS	0.86146	3.37752	0.219721	0.8306	0.0555494
381	2-hydroxyisobutyrate	Crohn's disease of ileocolon	Inverse variance weighted (multiplicative random effects)	0.800008	1.91975	0.333383	0.617334	0.0546455
381	2-hydroxyisobutyrate	Crohn's disease of ileocolon	MR Egger	1.5215	22807.1	0.000101501	0.881815	0.0818221
381	2-hydroxyisobutyrate	Crohn's disease of ileocolon	Inverse variance weighted (fixed effects)	0.800008	4.79332	0.133522	0.807016	0.0546455
381	2-hydroxyisobutyrate	Crohn's disease of ileocolon	Weighted median	0.98798	7.34901	0.132821	0.990576	0.0500167
381	2-hydroxyisobutyrate	Crohn's disease of ileocolon	Weighted mode	1.02728	7.13788	0.147846	0.98076	0.050086
381	2-hydroxyisobutyrate	Crohn's disease of ileocolon	MR RAPS	0.799527	5.05803	0.126382	0.8121	0.0546679
382	4-methyl-2-oxopentanoate	Crohn's disease of ileocolon	Inverse variance weighted (multiplicative random effects)	20.3824	903.57	0.459778	0.119151	1
382	4-methyl-2-oxopentanoate	Crohn's disease of ileocolon	Inverse variance weighted (fixed effects)	20.3824	722.242	0.575211	0.0976844	1
382	4-methyl-2-oxopentanoate	Crohn's disease of ileocolon	MR RAPS	21.5615	945.265	0.49182	0.111364	1
383	Phenyllactate (PLA)	Crohn's disease of ileocolon	MR RAPS	10.144	266.506	0.386108	0.164729	1
384	Homocitrulline	Crohn's disease of ileocolon	MR RAPS	2.13028	16.6608	0.272383	0.471117	0.210566
385	Aspartylphenylalanine	Crohn's disease of ileocolon	MR RAPS	0.507723	2.02146	0.127523	0.336272	0.112057
386	Levulinate (4-oxovalerate)	Crohn's disease of ileocolon	Inverse variance weighted (multiplicative random effects)	6.6555	23.3071	1.90052	0.00303481	0.865609
386	Levulinate (4-oxovalerate)	Crohn's disease of ileocolon	Inverse variance weighted (fixed effects)	6.6555	402.807	0.109967	0.365228	0.865609
386	Levulinate (4-oxovalerate)	Crohn's disease of ileocolon	MR RAPS	6.67938	493.882	0.0903337	0.387069	0.868866
388	Cholate	Crohn's disease of ileocolon	Inverse variance weighted (multiplicative random effects)	0.925026	1.19643	0.71519	0.552699	0.0712507
388	Cholate	Crohn's disease of ileocolon	MR Egger	0.665371	1.26409	0.350228	0.186625	0.481874
388	Cholate	Crohn's disease of ileocolon	Inverse variance weighted (fixed effects)	0.925026	1.23726	0.691586	0.599439	0.0712507
388	Cholate	Crohn's disease of ileocolon	Weighted median	0.884235	1.34257	0.582368	0.563652	0.101402
388	Cholate	Crohn's disease of ileocolon	Weighted mode	0.696548	1.12525	0.431176	0.177721	0.411348
388	Cholate	Crohn's disease of ileocolon	MR RAPS	0.920777	1.24469	0.681159	0.591473	0.0737599
390	Indoleacetate	Crohn's disease of ileocolon	MR RAPS	0.449605	7.83449	0.0258018	0.583534	0.0642156
391	Hyodeoxycholate	Crohn's disease of ileocolon	Inverse variance weighted (multiplicative random effects)	0.922834	1.21765	0.699399	0.570197	0.0751125
391	Hyodeoxycholate	Crohn's disease of ileocolon	MR Egger	0.759316	1.40591	0.410098	0.356917	0.305999
391	Hyodeoxycholate	Crohn's disease of ileocolon	Inverse variance weighted (fixed effects)	0.922834	1.28446	0.66302	0.634046	0.0751125
391	Hyodeoxycholate	Crohn's disease of ileocolon	Weighted median	0.95468	1.52572	0.597368	0.846262	0.0585822
391	Hyodeoxycholate	Crohn's disease of ileocolon	Weighted mode	1.03662	1.97757	0.543379	0.914551	0.055587
391	Hyodeoxycholate	Crohn's disease of ileocolon	MR RAPS	0.919864	1.29933	0.651222	0.635479	0.0771108
392	3-indoxyl sulfate	Crohn's disease of ileocolon	Inverse variance weighted (multiplicative random effects)	0.743291	1.33793	0.412938	0.322542	0.0795266
392	3-indoxyl sulfate	Crohn's disease of ileocolon	MR Egger	3.63738	8.08404e+08	1.64e-08	0.850509	0.99938
392	3-indoxyl sulfate	Crohn's disease of ileocolon	Inverse variance weighted (fixed effects)	0.743291	1.976	0.279595	0.55204	0.0795266
392	3-indoxyl sulfate	Crohn's disease of ileocolon	Weighted median	0.855647	2.61184	0.280312	0.78423	0.0592227
392	3-indoxyl sulfate	Crohn's disease of ileocolon	Weighted mode	0.952256	3.58204	0.25315	0.946859	0.0510028
392	3-indoxyl sulfate	Crohn's disease of ileocolon	MR RAPS	0.740475	2.11235	0.25957	0.574258	0.0801887
393	N-acetylglycine	Crohn's disease of ileocolon	MR RAPS	0.520838	6.56193	0.0413403	0.613816	0.0679261
394	Bilirubin (Z,Z)	Crohn's disease of ileocolon	MR RAPS	0.793865	1.15262	0.546772	0.224984	0.18231
396	Erythrose	Crohn's disease of ileocolon	Inverse variance weighted (multiplicative random effects)	0.555893	1.57321	0.196425	0.2686	0.0957842
396	Erythrose	Crohn's disease of ileocolon	MR Egger	3.70216	105.722	0.129642	0.372267	0.967826
396	Erythrose	Crohn's disease of ileocolon	Inverse variance weighted (fixed effects)	0.555893	1.89194	0.163334	0.347394	0.0957842
396	Erythrose	Crohn's disease of ileocolon	Weighted median	0.814029	3.80957	0.173942	0.793846	0.0578471
396	Erythrose	Crohn's disease of ileocolon	Weighted mode	1.41991	9.88287	0.204004	0.737659	0.090423
396	Erythrose	Crohn's disease of ileocolon	MR RAPS	0.541809	2.01286	0.145841	0.360062	0.0988079
397	Threonate	Crohn's disease of ileocolon	Inverse variance weighted (multiplicative random effects)	0.994384	1.64774	0.600096	0.982561	0.0500329
397	Threonate	Crohn's disease of ileocolon	MR Egger	1.05282	2.35942	0.469787	0.894628	0.0529129
397	Threonate	Crohn's disease of ileocolon	Inverse variance weighted (fixed effects)	0.994384	1.57818	0.626545	0.980933	0.0500329
397	Threonate	Crohn's disease of ileocolon	Weighted median	0.946334	1.87682	0.477162	0.874544	0.0530111
397	Threonate	Crohn's disease of ileocolon	Weighted mode	0.973733	1.78178	0.53214	0.932201	0.0507201
397	Threonate	Crohn's disease of ileocolon	MR RAPS	0.994209	1.62255	0.609196	0.981459	0.050035
398	Cysteine	Crohn's disease of ileocolon	Inverse variance weighted (multiplicative random effects)	0.516735	1.4157	0.18861	0.199154	0.17165
398	Cysteine	Crohn's disease of ileocolon	MR Egger	0.851984	4.71413	0.153979	0.845321	0.0608969
398	Cysteine	Crohn's disease of ileocolon	Inverse variance weighted (fixed effects)	0.516735	1.20364	0.221839	0.125927	0.17165
398	Cysteine	Crohn's disease of ileocolon	Weighted median	0.96145	3.37552	0.27385	0.951077	0.0507338
398	Cysteine	Crohn's disease of ileocolon	Weighted mode	0.737097	2.25778	0.24064	0.600622	0.0848588
398	Cysteine	Crohn's disease of ileocolon	MR RAPS	0.494271	1.22476	0.199472	0.127989	0.183597
399	Pyroglutamylglycine	Crohn's disease of ileocolon	Inverse variance weighted (multiplicative random effects)	1.48584	2.95318	0.747578	0.258519	0.245504
399	Pyroglutamylglycine	Crohn's disease of ileocolon	MR Egger	8.13623	3180.61	0.0208131	0.372146	1
399	Pyroglutamylglycine	Crohn's disease of ileocolon	Inverse variance weighted (fixed effects)	1.48584	3.10467	0.711101	0.292251	0.245504
399	Pyroglutamylglycine	Crohn's disease of ileocolon	Weighted median	1.70233	4.3822	0.661297	0.27013	0.449925
399	Pyroglutamylglycine	Crohn's disease of ileocolon	Weighted mode	1.84246	5.02129	0.676056	0.354677	0.594638
399	Pyroglutamylglycine	Crohn's disease of ileocolon	MR RAPS	1.49476	3.28968	0.679186	0.317908	0.252824
400	N-(2-furoyl)glycine	Crohn's disease of ileocolon	MR RAPS	1.08198	3.07009	0.381316	0.882284	0.0542621
401	DSGEGDFXAEGGGVR*	Crohn's disease of ileocolon	Inverse variance weighted (multiplicative random effects)	1.40495	1.91762	1.02934	0.0321751	0.273872
401	DSGEGDFXAEGGGVR*	Crohn's disease of ileocolon	MR Egger	2.89673	48.6967	0.172313	0.422791	0.999995
401	DSGEGDFXAEGGGVR*	Crohn's disease of ileocolon	Inverse variance weighted (fixed effects)	1.40495	2.58196	0.764493	0.273482	0.273872
401	DSGEGDFXAEGGGVR*	Crohn's disease of ileocolon	Weighted median	1.1099	2.4116	0.510818	0.792268	0.0657291
401	DSGEGDFXAEGGGVR*	Crohn's disease of ileocolon	Weighted mode	0.897316	2.91889	0.27585	0.860721	0.0637492
401	DSGEGDFXAEGGGVR*	Crohn's disease of ileocolon	MR RAPS	1.41102	2.70872	0.735027	0.300765	0.280639
402	Pyridoxate	Crohn's disease of ileocolon	Inverse variance weighted (multiplicative random effects)	0.888697	1.6165	0.488576	0.699063	0.0579838
402	Pyridoxate	Crohn's disease of ileocolon	MR Egger	0.718564	2.46232	0.209694	0.564633	0.102279
402	Pyridoxate	Crohn's disease of ileocolon	Inverse variance weighted (fixed effects)	0.888697	1.75204	0.450777	0.73331	0.0579838
402	Pyridoxate	Crohn's disease of ileocolon	Weighted median	0.861645	2.25326	0.329493	0.761417	0.0623712
402	Pyridoxate	Crohn's disease of ileocolon	Weighted mode	0.849278	2.28698	0.315382	0.753171	0.0647029
402	Pyridoxate	Crohn's disease of ileocolon	MR RAPS	0.885463	1.81719	0.43146	0.740166	0.0584571
403	Androsterone sulfate	Crohn's disease of ileocolon	Inverse variance weighted (multiplicative random effects)	0.937329	1.51344	0.580523	0.791186	0.0613681
403	Androsterone sulfate	Crohn's disease of ileocolon	Inverse variance weighted (fixed effects)	0.937329	1.19559	0.734857	0.602186	0.0613681
403	Androsterone sulfate	Crohn's disease of ileocolon	MR RAPS	0.93718	1.19609	0.734314	0.602157	0.0614228
404	3-carboxy-4-methyl-5-propyl-2-furanpropanoate (CMPF)	Crohn's disease of ileocolon	MR RAPS	0.645396	2.53807	0.164115	0.530794	0.0859712
405	3-(4-hydroxyphenyl)lactate	Crohn's disease of ileocolon	MR RAPS	0.976928	28.4167	0.0335855	0.989169	0.0500218
406	Acetylcarnitine	Crohn's disease of ileocolon	MR RAPS	2.38494	49.7706	0.114283	0.574995	0.179221
407	Serine	Crohn's disease of ileocolon	MR RAPS	5.04707	403.117	0.06319	0.468864	0.561908
408	Trans-4-hydroxyproline	Crohn's disease of ileocolon	Inverse variance weighted (multiplicative random effects)	0.2684	0.693415	0.10389	0.00660654	0.307675
408	Trans-4-hydroxyproline	Crohn's disease of ileocolon	MR Egger	0.19733	3.17951	0.0122469	0.207794	0.359355
408	Trans-4-hydroxyproline	Crohn's disease of ileocolon	Inverse variance weighted (fixed effects)	0.2684	0.721777	0.0998074	0.00916097	0.307675
408	Trans-4-hydroxyproline	Crohn's disease of ileocolon	Weighted median	0.268498	1.01164	0.0712615	0.0520281	0.307607
408	Trans-4-hydroxyproline	Crohn's disease of ileocolon	Weighted mode	0.271806	1.1511	0.0641808	0.137139	0.305286
408	Trans-4-hydroxyproline	Crohn's disease of ileocolon	MR RAPS	0.263009	0.778039	0.0889075	0.0157979	0.311474
409	Glutamate	Crohn's disease of ileocolon	MR RAPS	0.254831	10.5963	0.00612844	0.472234	0.0713154
410	Hexanoylcarnitine	Crohn's disease of ileocolon	Inverse variance weighted (multiplicative random effects)	1.31889	1.95066	0.891732	0.165703	0.107092
410	Hexanoylcarnitine	Crohn's disease of ileocolon	Inverse variance weighted (fixed effects)	1.31889	3.42634	0.507675	0.569867	0.107092
410	Hexanoylcarnitine	Crohn's disease of ileocolon	MR RAPS	1.31901	3.4462	0.504839	0.572033	0.107134
412	Alanine	Crohn's disease of ileocolon	MR RAPS	211.815	259497	0.172895	0.13988	1
413	Glycochenodeoxycholate	Crohn's disease of ileocolon	MR RAPS	0.54994	2.91069	0.103905	0.481854	0.0951432
414	2-aminobutyrate	Crohn's disease of ileocolon	Inverse variance weighted (multiplicative random effects)	1.93936	15.7977	0.238078	0.535961	0.102007
414	2-aminobutyrate	Crohn's disease of ileocolon	Inverse variance weighted (fixed effects)	1.93936	31.4068	0.119755	0.641071	0.102007
414	2-aminobutyrate	Crohn's disease of ileocolon	MR RAPS	1.94417	33.7337	0.112048	0.647935	0.102553
416	Dodecanedioate	Crohn's disease of ileocolon	MR RAPS	0.401992	6.66709	0.0242381	0.524781	0.0756379
417	Gamma-glutamylvaline	Crohn's disease of ileocolon	MR RAPS	37.7938	11526.8	0.123917	0.213309	1
418	Indolepropionate	Crohn's disease of ileocolon	MR RAPS	2.99042	20.769	0.430574	0.26794	0.531781
419	Butyrylcarnitine	Crohn's disease of ileocolon	Inverse variance weighted (multiplicative random effects)	1.36199	1.52679	1.21498	1.15e-07	0.395608
419	Butyrylcarnitine	Crohn's disease of ileocolon	MR Egger	1.24926	11.87	0.131479	0.743992	0.214965
419	Butyrylcarnitine	Crohn's disease of ileocolon	Inverse variance weighted (fixed effects)	1.36199	2.06456	0.898504	0.145472	0.395608
419	Butyrylcarnitine	Crohn's disease of ileocolon	Weighted median	1.34663	2.07587	0.873572	0.177708	0.36828
419	Butyrylcarnitine	Crohn's disease of ileocolon	Weighted mode	1.34765	2.08322	0.871802	0.311486	0.370066
419	Butyrylcarnitine	Crohn's disease of ileocolon	MR RAPS	1.36203	2.06792	0.897103	0.146971	0.39569
420	Myristoleate (14:1n5)	Crohn's disease of ileocolon	MR RAPS	11.1285	172.998	0.715874	0.0852093	1
421	Dehydroisoandrosterone sulfate (DHEA-S)	Crohn's disease of ileocolon	MR RAPS	0.50883	1.91379	0.135285	0.317483	0.0867823
422	Propionylcarnitine	Crohn's disease of ileocolon	Inverse variance weighted (multiplicative random effects)	5.15808	431.794	0.061617	0.467669	0.953869
422	Propionylcarnitine	Crohn's disease of ileocolon	Inverse variance weighted (fixed effects)	5.15808	82.6553	0.321889	0.246411	0.953869
422	Propionylcarnitine	Crohn's disease of ileocolon	MR RAPS	5.28614	87.6981	0.31863	0.245274	0.964474
423	Caproate (6:0)	Crohn's disease of ileocolon	Inverse variance weighted (multiplicative random effects)	1.67344	4.42249	0.63322	0.299068	0.191549
423	Caproate (6:0)	Crohn's disease of ileocolon	MR Egger	22.5935	1062.23	0.48056	0.10889	1
423	Caproate (6:0)	Crohn's disease of ileocolon	Inverse variance weighted (fixed effects)	1.67344	5.63985	0.49654	0.406194	0.191549
423	Caproate (6:0)	Crohn's disease of ileocolon	Weighted median	2.02819	11.9937	0.342975	0.435473	0.379837
423	Caproate (6:0)	Crohn's disease of ileocolon	Weighted mode	3.87801	35.2128	0.427089	0.238273	0.99669
423	Caproate (6:0)	Crohn's disease of ileocolon	MR RAPS	1.69518	6.11467	0.469957	0.420043	0.201054
424	Caprylate (8:0)	Crohn's disease of ileocolon	Inverse variance weighted (multiplicative random effects)	12.6014	47.5531	3.3393	0.000184363	1
424	Caprylate (8:0)	Crohn's disease of ileocolon	Inverse variance weighted (fixed effects)	12.6014	1192.85	0.133122	0.275091	1
424	Caprylate (8:0)	Crohn's disease of ileocolon	MR RAPS	12.6611	1582.38	0.101305	0.302765	1
425	10-undecenoate (11:1n1)	Crohn's disease of ileocolon	Inverse variance weighted (multiplicative random effects)	1.71256	4.72727	0.620417	0.29903	0.209041
425	10-undecenoate (11:1n1)	Crohn's disease of ileocolon	Inverse variance weighted (fixed effects)	1.71256	6.32565	0.463648	0.419658	0.209041
425	10-undecenoate (11:1n1)	Crohn's disease of ileocolon	MR RAPS	1.71461	6.42282	0.457726	0.423593	0.209975
426	Docosapentaenoate (n3 DPA; 22:5n3)	Crohn's disease of ileocolon	MR RAPS	0.348982	4.29338	0.0283666	0.41101	0.0805885
427	Phenol sulfate	Crohn's disease of ileocolon	Inverse variance weighted (multiplicative random effects)	2.36049	6.08579	0.915561	0.0754972	0.964168
427	Phenol sulfate	Crohn's disease of ileocolon	MR Egger	0.354355	6.54201	0.019194	0.438966	0.435933
427	Phenol sulfate	Crohn's disease of ileocolon	Inverse variance weighted (fixed effects)	2.36049	4.75354	1.17216	0.0161829	0.964168
427	Phenol sulfate	Crohn's disease of ileocolon	Weighted median	1.60049	4.55344	0.562553	0.377982	0.382376
427	Phenol sulfate	Crohn's disease of ileocolon	Weighted mode	1.39107	3.70263	0.522625	0.527278	0.191151
427	Phenol sulfate	Crohn's disease of ileocolon	MR RAPS	2.59718	5.60757	1.2029	0.0150814	0.993022
428	Bilirubin (E,E)*	Crohn's disease of ileocolon	MR RAPS	0.739014	1.20571	0.452962	0.225907	0.17403
429	Heme*	Crohn's disease of ileocolon	Inverse variance weighted (multiplicative random effects)	1.06834	3.42517	0.333222	0.911453	0.0522926
429	Heme*	Crohn's disease of ileocolon	MR Egger	2.25069	1676.96	0.00302071	0.785464	0.732811
429	Heme*	Crohn's disease of ileocolon	Inverse variance weighted (fixed effects)	1.06834	2.79414	0.408477	0.892803	0.0522926
429	Heme*	Crohn's disease of ileocolon	Weighted median	2.12438	8.20553	0.549993	0.274453	0.640713
429	Heme*	Crohn's disease of ileocolon	Weighted mode	2.97668	21.1799	0.41835	0.307635	0.98341
429	Heme*	Crohn's disease of ileocolon	MR RAPS	1.07256	2.91864	0.394152	0.890911	0.0525853
430	1-linoleoylglycerophosphoethanolamine*	Crohn's disease of ileocolon	MR RAPS	2.72375	11.3467	0.653831	0.168713	0.634628
431	3-dehydrocarnitine*	Crohn's disease of ileocolon	MR RAPS	9.8362	2700.07	0.0358327	0.424875	0.997839
432	Pyroglutamine*	Crohn's disease of ileocolon	Inverse variance weighted (multiplicative random effects)	0.594756	6.24603	0.0566336	0.664953	0.102329
432	Pyroglutamine*	Crohn's disease of ileocolon	Inverse variance weighted (fixed effects)	0.594756	1.95834	0.18063	0.392776	0.102329
432	Pyroglutamine*	Crohn's disease of ileocolon	MR RAPS	0.588343	1.95538	0.177023	0.386682	0.104042
433	C-glycosyltryptophan*	Crohn's disease of ileocolon	MR RAPS	40.6825	4496404906	3.68e-07	0.694929	1
434	X-03056--N-[3-(2-Oxopyrrolidin-1-yl)propyl]acetamide	Crohn's disease of ileocolon	MR RAPS	1.01685	17.5584	0.0588879	0.990829	0.0500148
435	X-11422--xanthine	Crohn's disease of ileocolon	Inverse variance weighted (multiplicative random effects)	0.679582	6.94301	0.0665175	0.744595	0.0632844
435	X-11422--xanthine	Crohn's disease of ileocolon	MR Egger	1.75248	8558.33	0.000358855	0.866184	0.124523
435	X-11422--xanthine	Crohn's disease of ileocolon	Inverse variance weighted (fixed effects)	0.679582	7.07919	0.065238	0.746639	0.0632844
435	X-11422--xanthine	Crohn's disease of ileocolon	Weighted median	0.522625	10.0973	0.0270503	0.667557	0.0798163
435	X-11422--xanthine	Crohn's disease of ileocolon	Weighted mode	0.250599	15.8494	0.00396229	0.548764	0.125232
435	X-11422--xanthine	Crohn's disease of ileocolon	MR RAPS	0.669889	7.88883	0.0568844	0.750164	0.0641088
436	X-11423--O-sulfo-L-tyrosine	Crohn's disease of ileocolon	MR RAPS	0.761652	230.175	0.00252032	0.925555	0.0514996
438	HWESASXX*	Crohn's disease of ileocolon	Inverse variance weighted (multiplicative random effects)	0.434896	0.543755	0.34783	2.76e-13	0.190622
438	HWESASXX*	Crohn's disease of ileocolon	Inverse variance weighted (fixed effects)	0.434896	1.29426	0.146133	0.134541	0.190622
438	HWESASXX*	Crohn's disease of ileocolon	MR RAPS	0.434115	1.37934	0.136627	0.157145	0.191023
439	X-11593--O-methylascorbate*	Crohn's disease of ileocolon	Inverse variance weighted (multiplicative random effects)	0.736572	3.36386	0.161285	0.693171	0.0746824
439	X-11593--O-methylascorbate*	Crohn's disease of ileocolon	MR Egger	0.828908	31.3614	0.0219088	0.900791	0.0603187
439	X-11593--O-methylascorbate*	Crohn's disease of ileocolon	Inverse variance weighted (fixed effects)	0.736572	2.27675	0.238296	0.595397	0.0746824
439	X-11593--O-methylascorbate*	Crohn's disease of ileocolon	Weighted median	0.989501	3.39558	0.288349	0.986615	0.0500385
439	X-11593--O-methylascorbate*	Crohn's disease of ileocolon	Weighted mode	1.07805	3.82765	0.30363	0.911979	0.0521307
439	X-11593--O-methylascorbate*	Crohn's disease of ileocolon	MR RAPS	0.734524	2.28133	0.236496	0.593618	0.0750736
440	Adrenate (22:4n6)	Crohn's disease of ileocolon	MR RAPS	0.292088	1.80938	0.0471516	0.185938	0.116797
441	Homostachydrine*	Crohn's disease of ileocolon	Inverse variance weighted (multiplicative random effects)	0.647593	1.29671	0.323415	0.220003	0.141349
441	Homostachydrine*	Crohn's disease of ileocolon	MR Egger	5.56616	117.436	0.263821	0.221382	1
441	Homostachydrine*	Crohn's disease of ileocolon	Inverse variance weighted (fixed effects)	0.647593	1.40031	0.299489	0.269471	0.141349
441	Homostachydrine*	Crohn's disease of ileocolon	Weighted median	0.597139	1.7394	0.204999	0.344541	0.170359
441	Homostachydrine*	Crohn's disease of ileocolon	Weighted mode	0.401595	2.16523	0.0744856	0.337102	0.319341
441	Homostachydrine*	Crohn's disease of ileocolon	MR RAPS	0.633682	1.43954	0.278945	0.275828	0.148935
442	ADSGEGDFXAEGGGVR*	Crohn's disease of ileocolon	Inverse variance weighted (multiplicative random effects)	0.787258	0.84673	0.731964	1.21e-10	0.103848
442	ADSGEGDFXAEGGGVR*	Crohn's disease of ileocolon	Inverse variance weighted (fixed effects)	0.787258	1.49322	0.41506	0.463927	0.103848
442	ADSGEGDFXAEGGGVR*	Crohn's disease of ileocolon	MR RAPS	0.787226	1.52422	0.406584	0.477897	0.103865
444	X-11793--oxidized bilirubin*	Crohn's disease of ileocolon	Inverse variance weighted (multiplicative random effects)	0.607329	1.05918	0.34824	0.0788507	0.213303
444	X-11793--oxidized bilirubin*	Crohn's disease of ileocolon	Inverse variance weighted (fixed effects)	0.607329	1.15372	0.319704	0.127699	0.213303
444	X-11793--oxidized bilirubin*	Crohn's disease of ileocolon	MR RAPS	0.606851	1.15832	0.317932	0.129929	0.213711
445	1-arachidonoylglycerophosphocholine*	Crohn's disease of ileocolon	Inverse variance weighted (multiplicative random effects)	0.612101	1.70646	0.219558	0.34806	0.111642
445	1-arachidonoylglycerophosphocholine*	Crohn's disease of ileocolon	MR Egger	0.206937	16.0658	0.00266546	0.363369	0.317008
445	1-arachidonoylglycerophosphocholine*	Crohn's disease of ileocolon	Inverse variance weighted (fixed effects)	0.612101	1.69388	0.221189	0.344567	0.111642
445	1-arachidonoylglycerophosphocholine*	Crohn's disease of ileocolon	Weighted median	0.570506	1.62596	0.200176	0.293578	0.126008
445	1-arachidonoylglycerophosphocholine*	Crohn's disease of ileocolon	Weighted mode	0.477051	1.45765	0.156127	0.323597	0.164084
445	1-arachidonoylglycerophosphocholine*	Crohn's disease of ileocolon	MR RAPS	0.610644	1.70448	0.218769	0.346297	0.112119
446	1-palmitoleoylglycerophosphocholine*	Crohn's disease of ileocolon	MR RAPS	25.4352	1117.71	0.578817	0.0935996	1
447	Gamma-glutamylmethionine*	Crohn's disease of ileocolon	Inverse variance weighted (multiplicative random effects)	0.813051	2.15759	0.306385	0.677673	0.0599032
447	Gamma-glutamylmethionine*	Crohn's disease of ileocolon	MR Egger	2.54378	47.3627	0.136622	0.457886	0.674727
447	Gamma-glutamylmethionine*	Crohn's disease of ileocolon	Inverse variance weighted (fixed effects)	0.813051	2.38863	0.276749	0.706615	0.0599032
447	Gamma-glutamylmethionine*	Crohn's disease of ileocolon	Weighted median	1.16734	4.8489	0.281029	0.831355	0.0578927
447	Gamma-glutamylmethionine*	Crohn's disease of ileocolon	Weighted mode	1.52181	7.32112	0.316331	0.622722	0.128971
447	Gamma-glutamylmethionine*	Crohn's disease of ileocolon	MR RAPS	0.807148	2.53246	0.257255	0.713433	0.0605431
448	Gamma-glutamylthreonine*	Crohn's disease of ileocolon	Inverse variance weighted (multiplicative random effects)	1.92078	4.30975	0.856059	0.113406	0.322174
448	Gamma-glutamylthreonine*	Crohn's disease of ileocolon	MR Egger	2.01919	71.3392	0.0571511	0.65757	0.38133
448	Gamma-glutamylthreonine*	Crohn's disease of ileocolon	Inverse variance weighted (fixed effects)	1.92078	6.18979	0.596046	0.274259	0.322174
448	Gamma-glutamylthreonine*	Crohn's disease of ileocolon	Weighted median	1.95726	8.86854	0.431962	0.383689	0.343663
448	Gamma-glutamylthreonine*	Crohn's disease of ileocolon	Weighted mode	1.70171	11.3974	0.254078	0.600774	0.207528
448	Gamma-glutamylthreonine*	Crohn's disease of ileocolon	MR RAPS	1.9392	6.78696	0.554078	0.300113	0.332955
449	Gamma-tocopherol	Crohn's disease of ileocolon	Inverse variance weighted (multiplicative random effects)	1.20368	1.63944	0.883748	0.239583	0.100799
449	Gamma-tocopherol	Crohn's disease of ileocolon	MR Egger	0.696926	2.73937	0.177305	0.571144	0.165501
449	Gamma-tocopherol	Crohn's disease of ileocolon	Inverse variance weighted (fixed effects)	1.20368	2.15962	0.670885	0.534199	0.100799
449	Gamma-tocopherol	Crohn's disease of ileocolon	Weighted median	1.03606	2.15287	0.498604	0.924356	0.0515564
449	Gamma-tocopherol	Crohn's disease of ileocolon	Weighted mode	0.974702	2.27455	0.417685	0.953908	0.050766
449	Gamma-tocopherol	Crohn's disease of ileocolon	MR RAPS	1.20624	2.26338	0.642853	0.559243	0.10211
450	Gamma-glutamylphenylalanine	Crohn's disease of ileocolon	Inverse variance weighted (multiplicative random effects)	13.6461	186.524	0.998343	0.0501412	1
450	Gamma-glutamylphenylalanine	Crohn's disease of ileocolon	Inverse variance weighted (fixed effects)	13.6461	985.903	0.188877	0.231391	1
450	Gamma-glutamylphenylalanine	Crohn's disease of ileocolon	MR RAPS	13.8367	1270.98	0.150636	0.254608	1
451	Isobutyrylcarnitine	Crohn's disease of ileocolon	Inverse variance weighted (multiplicative random effects)	1.3544	2.86153	0.641054	0.426675	0.0695823
451	Isobutyrylcarnitine	Crohn's disease of ileocolon	Inverse variance weighted (fixed effects)	1.3544	7.28129	0.251932	0.723709	0.0695823
451	Isobutyrylcarnitine	Crohn's disease of ileocolon	MR RAPS	1.3552	7.67537	0.239279	0.731187	0.0696714
452	Pseudouridine	Crohn's disease of ileocolon	Inverse variance weighted (multiplicative random effects)	1.20804	7.13627	0.204498	0.834797	0.0554671
452	Pseudouridine	Crohn's disease of ileocolon	MR Egger	0.199491	322.054	0.000123572	0.656092	0.135085
452	Pseudouridine	Crohn's disease of ileocolon	Inverse variance weighted (fixed effects)	1.20804	7.3513	0.198516	0.837474	0.0554671
452	Pseudouridine	Crohn's disease of ileocolon	Weighted median	0.963928	12.8663	0.072216	0.977831	0.0501643
452	Pseudouridine	Crohn's disease of ileocolon	Weighted mode	0.917269	53.4807	0.0157324	0.967153	0.050865
452	Pseudouridine	Crohn's disease of ileocolon	MR RAPS	1.2174	8.1163	0.182602	0.838956	0.0559713
453	Valerate	Crohn's disease of ileocolon	Inverse variance weighted (multiplicative random effects)	0.483907	2.19167	0.106844	0.346268	0.129059
453	Valerate	Crohn's disease of ileocolon	MR Egger	0.0969734	51.8303	0.000181435	0.425126	0.299524
453	Valerate	Crohn's disease of ileocolon	Inverse variance weighted (fixed effects)	0.483907	1.80198	0.129949	0.279207	0.129059
453	Valerate	Crohn's disease of ileocolon	Weighted median	0.2936	1.86946	0.0461101	0.194434	0.20117
453	Valerate	Crohn's disease of ileocolon	Weighted mode	0.235421	3.33651	0.0166111	0.312796	0.227899
453	Valerate	Crohn's disease of ileocolon	MR RAPS	0.465975	1.86121	0.116662	0.279801	0.13483
454	Palmitoleate (16:1n7)	Crohn's disease of ileocolon	MR RAPS	11.2019	177.57	0.70666	0.0865789	1
456	Erythronate*	Crohn's disease of ileocolon	Inverse variance weighted (multiplicative random effects)	0.30067	0.744787	0.12138	0.00941284	0.0703541
456	Erythronate*	Crohn's disease of ileocolon	MR Egger	1.02186	2.92e+26	3.57e-27	0.999028	0.0500194
456	Erythronate*	Crohn's disease of ileocolon	Inverse variance weighted (fixed effects)	0.30067	9.40063	0.00961664	0.493841	0.0703541
456	Erythronate*	Crohn's disease of ileocolon	Weighted median	0.268271	12.0343	0.00598038	0.497755	0.0723209
456	Erythronate*	Crohn's disease of ileocolon	Weighted mode	0.549517	40.6895	0.0074213	0.810723	0.0583524
456	Erythronate*	Crohn's disease of ileocolon	MR RAPS	0.300126	10.7507	0.00837861	0.509767	0.0703863
457	Lathosterol	Crohn's disease of ileocolon	Inverse variance weighted (multiplicative random effects)	0.77805	1.2216	0.495551	0.27555	0.116639
457	Lathosterol	Crohn's disease of ileocolon	MR Egger	1.46155	5.55375	0.384625	0.554274	0.343212
457	Lathosterol	Crohn's disease of ileocolon	Inverse variance weighted (fixed effects)	0.77805	1.37667	0.43973	0.388682	0.116639
457	Lathosterol	Crohn's disease of ileocolon	Weighted median	0.753282	1.65368	0.343135	0.480063	0.132821
457	Lathosterol	Crohn's disease of ileocolon	Weighted mode	0.703853	2.38037	0.208123	0.580479	0.17062
457	Lathosterol	Crohn's disease of ileocolon	MR RAPS	0.76954	1.40739	0.420774	0.395047	0.121992
458	X-12095--N1-methyl-3-pyridone-4-carboxamide	Crohn's disease of ileocolon	MR RAPS	12.751	475.526	0.341911	0.167976	1
460	Eicosenoate (20:1n9 or 11)	Crohn's disease of ileocolon	Inverse variance weighted (multiplicative random effects)	1.55558	3.19556	0.757251	0.22899	0.209469
460	Eicosenoate (20:1n9 or 11)	Crohn's disease of ileocolon	MR Egger	0.385114	6.80769	0.021786	0.478028	0.24884
460	Eicosenoate (20:1n9 or 11)	Crohn's disease of ileocolon	Inverse variance weighted (fixed effects)	1.55558	4.08532	0.592327	0.369756	0.209469
460	Eicosenoate (20:1n9 or 11)	Crohn's disease of ileocolon	Weighted median	2.13579	7.81943	0.583368	0.251773	0.650442
460	Eicosenoate (20:1n9 or 11)	Crohn's disease of ileocolon	Weighted mode	2.38513	14.1617	0.401706	0.36139	0.816635
460	Eicosenoate (20:1n9 or 11)	Crohn's disease of ileocolon	MR RAPS	1.57128	4.3975	0.561434	0.389451	0.218787
461	X-12244--N-acetylcarnosine	Crohn's disease of ileocolon	Inverse variance weighted (multiplicative random effects)	0.577786	1.51815	0.219898	0.265729	0.0782567
461	X-12244--N-acetylcarnosine	Crohn's disease of ileocolon	MR Egger	0.0125833	6890000000000000	2.3e-20	0.725043	0.212498
461	X-12244--N-acetylcarnosine	Crohn's disease of ileocolon	Inverse variance weighted (fixed effects)	0.577786	3.21633	0.103795	0.531143	0.0782567
461	X-12244--N-acetylcarnosine	Crohn's disease of ileocolon	Weighted median	0.74486	5.20721	0.106548	0.766549	0.0601941
461	X-12244--N-acetylcarnosine	Crohn's disease of ileocolon	Weighted mode	0.920393	9.91684	0.0854227	0.951693	0.0509847
461	X-12244--N-acetylcarnosine	Crohn's disease of ileocolon	MR RAPS	0.576937	3.31777	0.100325	0.537719	0.0783725
463	1-eicosatrienoylglycerophosphocholine*	Crohn's disease of ileocolon	Inverse variance weighted (multiplicative random effects)	0.25064	0.386659	0.162469	3.95e-10	0.142304
463	1-eicosatrienoylglycerophosphocholine*	Crohn's disease of ileocolon	Inverse variance weighted (fixed effects)	0.25064	1.76445	0.0356034	0.164616	0.142304
463	1-eicosatrienoylglycerophosphocholine*	Crohn's disease of ileocolon	MR RAPS	0.250648	1.90047	0.0330572	0.18065	0.142302
464	1-docosahexaenoylglycerophosphocholine*	Crohn's disease of ileocolon	Inverse variance weighted (multiplicative random effects)	0.452963	2.90654	0.070591	0.40371	0.103853
464	1-docosahexaenoylglycerophosphocholine*	Crohn's disease of ileocolon	MR Egger	0.0794186	8463.24	7.45e-07	0.603829	0.207862
464	1-docosahexaenoylglycerophosphocholine*	Crohn's disease of ileocolon	Inverse variance weighted (fixed effects)	0.452963	2.20812	0.0929186	0.327146	0.103853
464	1-docosahexaenoylglycerophosphocholine*	Crohn's disease of ileocolon	Weighted median	1.12019	9.46885	0.132522	0.916993	0.0525109
464	1-docosahexaenoylglycerophosphocholine*	Crohn's disease of ileocolon	Weighted mode	1.77946	41.0919	0.0770584	0.7337	0.159795
464	1-docosahexaenoylglycerophosphocholine*	Crohn's disease of ileocolon	MR RAPS	0.427376	2.23167	0.0818448	0.313421	0.109159
465	1-eicosadienoylglycerophosphocholine*	Crohn's disease of ileocolon	MR RAPS	9.70997	258.453	0.364799	0.174558	0.999998
467	X-12442--5,8-tetradecadienoate	Crohn's disease of ileocolon	MR RAPS	1.20703	5.34925	0.272361	0.804351	0.0592692
468	Octanoylcarnitine	Crohn's disease of ileocolon	Inverse variance weighted (multiplicative random effects)	1.27248	1.9669	0.823225	0.27814	0.11029
468	Octanoylcarnitine	Crohn's disease of ileocolon	Inverse variance weighted (fixed effects)	1.27248	2.78701	0.58098	0.5469	0.11029
468	Octanoylcarnitine	Crohn's disease of ileocolon	MR RAPS	1.27267	2.80135	0.578184	0.549179	0.110379
469	Alpha-hydroxyisovalerate	Crohn's disease of ileocolon	Inverse variance weighted (multiplicative random effects)	2.59386	3.81614	1.76306	1.31e-06	0.756234
469	Alpha-hydroxyisovalerate	Crohn's disease of ileocolon	MR Egger	3.32289	20999.3	0.000525808	0.660474	0.972797
469	Alpha-hydroxyisovalerate	Crohn's disease of ileocolon	Inverse variance weighted (fixed effects)	2.59386	8.48538	0.792904	0.114969	0.756234
469	Alpha-hydroxyisovalerate	Crohn's disease of ileocolon	Weighted median	2.67178	9.50434	0.751066	0.129049	0.795247
469	Alpha-hydroxyisovalerate	Crohn's disease of ileocolon	Weighted mode	2.69496	11.8889	0.61089	0.32067	0.806104
469	Alpha-hydroxyisovalerate	Crohn's disease of ileocolon	MR RAPS	2.59612	8.76921	0.768579	0.124496	0.757419
470	N-acetylthreonine	Crohn's disease of ileocolon	Inverse variance weighted (multiplicative random effects)	2.86165	6.81638	1.20138	0.0175816	0.712111
470	N-acetylthreonine	Crohn's disease of ileocolon	MR Egger	0.684141	48.112	0.0097283	0.845036	0.0713124
470	N-acetylthreonine	Crohn's disease of ileocolon	Inverse variance weighted (fixed effects)	2.86165	11.3242	0.723146	0.1341	0.712111
470	N-acetylthreonine	Crohn's disease of ileocolon	Weighted median	2.02062	12.1822	0.335151	0.442852	0.280864
470	N-acetylthreonine	Crohn's disease of ileocolon	Weighted mode	1.90509	14.2424	0.254827	0.545629	0.231133
470	N-acetylthreonine	Crohn's disease of ileocolon	MR RAPS	2.90873	12.9086	0.655434	0.160215	0.73365
471	Decanoylcarnitine	Crohn's disease of ileocolon	Inverse variance weighted (multiplicative random effects)	1.4651	2.1287	1.00837	0.0451	0.200592
471	Decanoylcarnitine	Crohn's disease of ileocolon	MR Egger	0.850912	171.072	0.00423243	0.917088	0.0648945
471	Decanoylcarnitine	Crohn's disease of ileocolon	Inverse variance weighted (fixed effects)	1.4651	3.42925	0.625942	0.378733	0.200592
471	Decanoylcarnitine	Crohn's disease of ileocolon	Weighted median	1.43392	3.64355	0.564317	0.448752	0.180649
471	Decanoylcarnitine	Crohn's disease of ileocolon	Weighted mode	1.3811	4.09724	0.465544	0.619449	0.150108
471	Decanoylcarnitine	Crohn's disease of ileocolon	MR RAPS	1.46566	3.46808	0.619409	0.384305	0.200965
472	1-palmitoylglycerophosphocholine	Crohn's disease of ileocolon	Inverse variance weighted (multiplicative random effects)	0.605202	2.63615	0.138941	0.503557	0.0842753
472	1-palmitoylglycerophosphocholine	Crohn's disease of ileocolon	MR Egger	0.436894	503.683	0.00037896	0.811907	0.12098
472	1-palmitoylglycerophosphocholine	Crohn's disease of ileocolon	Inverse variance weighted (fixed effects)	0.605202	2.5667	0.1427	0.495705	0.0842753
472	1-palmitoylglycerophosphocholine	Crohn's disease of ileocolon	Weighted median	0.605552	5.26662	0.0696259	0.649443	0.0842133
472	1-palmitoylglycerophosphocholine	Crohn's disease of ileocolon	Weighted mode	14.4834	1158.53	0.181065	0.24153	1
472	1-palmitoylglycerophosphocholine	Crohn's disease of ileocolon	MR RAPS	0.591347	2.69762	0.12963	0.497489	0.0867741
473	1-heptadecanoylglycerophosphocholine	Crohn's disease of ileocolon	Inverse variance weighted (multiplicative random effects)	0.922841	2.7597	0.308597	0.885757	0.0523025
473	1-heptadecanoylglycerophosphocholine	Crohn's disease of ileocolon	MR Egger	0.103695	15.5971	0.000689404	0.331871	0.381288
473	1-heptadecanoylglycerophosphocholine	Crohn's disease of ileocolon	Inverse variance weighted (fixed effects)	0.922841	2.79181	0.305047	0.886943	0.0523025
473	1-heptadecanoylglycerophosphocholine	Crohn's disease of ileocolon	Weighted median	1.0697	4.57256	0.250244	0.927567	0.0518751
473	1-heptadecanoylglycerophosphocholine	Crohn's disease of ileocolon	Weighted mode	1.24505	8.39885	0.184568	0.827587	0.0734178
473	1-heptadecanoylglycerophosphocholine	Crohn's disease of ileocolon	MR RAPS	0.920105	2.972	0.284856	0.889297	0.0524691
474	1-oleoylglycerophosphocholine	Crohn's disease of ileocolon	Inverse variance weighted (multiplicative random effects)	0.681537	3.21512	0.144471	0.628085	0.0697083
474	1-oleoylglycerophosphocholine	Crohn's disease of ileocolon	MR Egger	0.0345193	1.77757	0.000670344	0.0894653	0.242079
474	1-oleoylglycerophosphocholine	Crohn's disease of ileocolon	Inverse variance weighted (fixed effects)	0.681537	2.55532	0.181775	0.569616	0.0697083
474	1-oleoylglycerophosphocholine	Crohn's disease of ileocolon	Weighted median	0.623282	4.39845	0.0883221	0.635353	0.077716
474	1-oleoylglycerophosphocholine	Crohn's disease of ileocolon	Weighted mode	0.115289	2.87516	0.00462291	0.217401	0.210472
474	1-oleoylglycerophosphocholine	Crohn's disease of ileocolon	MR RAPS	0.663552	2.58991	0.170006	0.554972	0.0720299
475	1-stearoylglycerophosphocholine	Crohn's disease of ileocolon	Inverse variance weighted (multiplicative random effects)	1.39845	3.13442	0.623928	0.4154	0.125292
475	1-stearoylglycerophosphocholine	Crohn's disease of ileocolon	MR Egger	0.657613	6.39537	0.06762	0.695765	0.105663
475	1-stearoylglycerophosphocholine	Crohn's disease of ileocolon	Inverse variance weighted (fixed effects)	1.39845	3.7637	0.519609	0.50674	0.125292
475	1-stearoylglycerophosphocholine	Crohn's disease of ileocolon	Weighted median	1.6106	6.22901	0.416445	0.489799	0.230472
475	1-stearoylglycerophosphocholine	Crohn's disease of ileocolon	Weighted mode	1.75509	10.3869	0.296558	0.546795	0.326119
475	1-stearoylglycerophosphocholine	Crohn's disease of ileocolon	MR RAPS	1.40788	4.05166	0.489215	0.525878	0.128992
476	5-dodecenoate (12:1n7)	Crohn's disease of ileocolon	MR RAPS	17.7947	518.417	0.610802	0.0942406	1
477	Stearidonate (18:4n3)	Crohn's disease of ileocolon	MR RAPS	0.260396	1.76481	0.038421	0.168147	0.119213
478	10-heptadecenoate (17:1n7)	Crohn's disease of ileocolon	Inverse variance weighted (multiplicative random effects)	0.567021	3.83163	0.0839103	0.560557	0.0771087
478	10-heptadecenoate (17:1n7)	Crohn's disease of ileocolon	MR Egger	1926.97	44505578187	8.34e-05	0.291528	1
478	10-heptadecenoate (17:1n7)	Crohn's disease of ileocolon	Inverse variance weighted (fixed effects)	0.567021	3.08252	0.104302	0.511313	0.0771087
478	10-heptadecenoate (17:1n7)	Crohn's disease of ileocolon	Weighted median	0.971138	7.68998	0.122641	0.977869	0.050118
478	10-heptadecenoate (17:1n7)	Crohn's disease of ileocolon	Weighted mode	1.53073	17.5507	0.133507	0.75485	0.0905557
478	10-heptadecenoate (17:1n7)	Crohn's disease of ileocolon	MR RAPS	0.551062	3.345	0.0907829	0.517202	0.0791815
479	10-nonadecenoate (19:1n9)	Crohn's disease of ileocolon	MR RAPS	2.04553	71.6203	0.0584217	0.693222	0.0961391
480	Epiandrosterone sulfate	Crohn's disease of ileocolon	Inverse variance weighted (multiplicative random effects)	0.813502	1.21388	0.54518	0.312108	0.104711
480	Epiandrosterone sulfate	Crohn's disease of ileocolon	Inverse variance weighted (fixed effects)	0.813502	1.25577	0.526997	0.351425	0.104711
480	Epiandrosterone sulfate	Crohn's disease of ileocolon	MR RAPS	0.813288	1.25905	0.525346	0.353986	0.10484
481	Linolenate [alpha or gamma; (18:3n3 or 6)]	Crohn's disease of ileocolon	Inverse variance weighted (multiplicative random effects)	1.25127	3.23053	0.484649	0.643214	0.0613294
481	Linolenate [alpha or gamma; (18:3n3 or 6)]	Crohn's disease of ileocolon	MR Egger	2.1884	6741.09	0.000710431	0.747137	0.315976
481	Linolenate [alpha or gamma; (18:3n3 or 6)]	Crohn's disease of ileocolon	Inverse variance weighted (fixed effects)	1.25127	9.13417	0.171408	0.825081	0.0613294
481	Linolenate [alpha or gamma; (18:3n3 or 6)]	Crohn's disease of ileocolon	Weighted median	1.5817	15.9293	0.157055	0.697213	0.112019
481	Linolenate [alpha or gamma; (18:3n3 or 6)]	Crohn's disease of ileocolon	Weighted mode	1.81167	22.3887	0.146599	0.688713	0.172798
481	Linolenate [alpha or gamma; (18:3n3 or 6)]	Crohn's disease of ileocolon	MR RAPS	1.2528	10.6935	0.146772	0.836779	0.0614689
482	X-12510--2-aminooctanoic acid	Crohn's disease of ileocolon	Inverse variance weighted (multiplicative random effects)	1.42056	2.93773	0.686924	0.343647	0.284877
482	X-12510--2-aminooctanoic acid	Crohn's disease of ileocolon	MR Egger	2.12827	47.9324	0.0944986	0.486462	0.961342
482	X-12510--2-aminooctanoic acid	Crohn's disease of ileocolon	Inverse variance weighted (fixed effects)	1.42056	2.6495	0.761654	0.269646	0.284877
482	X-12510--2-aminooctanoic acid	Crohn's disease of ileocolon	Weighted median	1.48694	2.93022	0.754551	0.251684	0.363163
482	X-12510--2-aminooctanoic acid	Crohn's disease of ileocolon	Weighted mode	1.50487	2.8935	0.782666	0.345168	0.385544
482	X-12510--2-aminooctanoic acid	Crohn's disease of ileocolon	MR RAPS	1.42254	2.66214	0.760148	0.270335	0.287085
483	Bilirubin (E,Z or Z,E)*	Crohn's disease of ileocolon	MR RAPS	0.620067	1.34773	0.285283	0.227587	0.154105
484	1-arachidonoylglycerophosphoinositol*	Crohn's disease of ileocolon	MR RAPS	1.7864	29.6224	0.10773	0.685524	0.0880338
485	Asparagine	Crohn's disease of ileocolon	Inverse variance weighted (multiplicative random effects)	0.480448	1.85044	0.124744	0.286661	0.076143
485	Asparagine	Crohn's disease of ileocolon	Inverse variance weighted (fixed effects)	0.480448	4.46259	0.0517258	0.519161	0.076143
485	Asparagine	Crohn's disease of ileocolon	MR RAPS	0.479938	4.59388	0.0501407	0.524135	0.0761954
486	Stachydrine	Crohn's disease of ileocolon	Inverse variance weighted (multiplicative random effects)	1.00495	1.43661	0.702985	0.978411	0.0500717
486	Stachydrine	Crohn's disease of ileocolon	MR Egger	1.48484	10.9637	0.201095	0.638016	0.686982
486	Stachydrine	Crohn's disease of ileocolon	Inverse variance weighted (fixed effects)	1.00495	1.48639	0.679443	0.980289	0.0500717
486	Stachydrine	Crohn's disease of ileocolon	Weighted median	0.982234	1.66976	0.577797	0.947207	0.0509258
486	Stachydrine	Crohn's disease of ileocolon	Weighted mode	1.04048	1.99344	0.543078	0.909447	0.0548136
486	Stachydrine	Crohn's disease of ileocolon	MR RAPS	1.00508	1.52455	0.662613	0.980979	0.0500757
487	Isovalerylcarnitine	Crohn's disease of ileocolon	Inverse variance weighted (multiplicative random effects)	0.966787	1.66282	0.562103	0.902835	0.0501774
487	Isovalerylcarnitine	Crohn's disease of ileocolon	Inverse variance weighted (fixed effects)	0.966787	4.6922	0.199198	0.966571	0.0501774
487	Isovalerylcarnitine	Crohn's disease of ileocolon	MR RAPS	0.96676	4.83543	0.193287	0.967169	0.0501777
490	1-linoleoylglycerophosphocholine	Crohn's disease of ileocolon	Inverse variance weighted (multiplicative random effects)	0.60551	1.78532	0.205364	0.363148	0.0888817
490	1-linoleoylglycerophosphocholine	Crohn's disease of ileocolon	MR Egger	0.297132	64.3126	0.00137279	0.63258	0.177665
490	1-linoleoylglycerophosphocholine	Crohn's disease of ileocolon	Inverse variance weighted (fixed effects)	0.60551	2.3477	0.156171	0.468072	0.0888817
490	1-linoleoylglycerophosphocholine	Crohn's disease of ileocolon	Weighted median	0.833559	5.45659	0.127336	0.849378	0.0567853
490	1-linoleoylglycerophosphocholine	Crohn's disease of ileocolon	Weighted mode	0.911207	10.2429	0.0810608	0.941198	0.0519236
490	1-linoleoylglycerophosphocholine	Crohn's disease of ileocolon	MR RAPS	0.597321	2.50841	0.142238	0.481526	0.0905484
491	Bradykinin, des-arg(9)	Crohn's disease of ileocolon	Inverse variance weighted (multiplicative random effects)	1.01158	1.17256	0.872703	0.878519	0.0507475
491	Bradykinin, des-arg(9)	Crohn's disease of ileocolon	MR Egger	0.903874	6.94479	0.11764	0.866238	0.102912
491	Bradykinin, des-arg(9)	Crohn's disease of ileocolon	Inverse variance weighted (fixed effects)	1.01158	1.34444	0.761135	0.936754	0.0507475
491	Bradykinin, des-arg(9)	Crohn's disease of ileocolon	Weighted median	1.03443	1.40762	0.76018	0.829479	0.0566256
491	Bradykinin, des-arg(9)	Crohn's disease of ileocolon	Weighted mode	1.10783	1.65153	0.743125	0.665084	0.116781
491	Bradykinin, des-arg(9)	Crohn's disease of ileocolon	MR RAPS	1.01161	1.34927	0.758445	0.937415	0.0507504
492	Gamma-glutamylisoleucine*	Crohn's disease of ileocolon	Inverse variance weighted (multiplicative random effects)	1.217	2.89925	0.510852	0.657456	0.0768243
492	Gamma-glutamylisoleucine*	Crohn's disease of ileocolon	MR Egger	1.31573	12.7062	0.136244	0.803441	0.107511
492	Gamma-glutamylisoleucine*	Crohn's disease of ileocolon	Inverse variance weighted (fixed effects)	1.217	2.952	0.501725	0.663994	0.0768243
492	Gamma-glutamylisoleucine*	Crohn's disease of ileocolon	Weighted median	1.17628	4.21173	0.328518	0.802989	0.0676243
492	Gamma-glutamylisoleucine*	Crohn's disease of ileocolon	Weighted mode	1.09821	5.43471	0.221918	0.909732	0.0554374
492	Gamma-glutamylisoleucine*	Crohn's disease of ileocolon	MR RAPS	1.22564	3.12518	0.480671	0.670083	0.0790307
495	Isovalerate	Crohn's disease of ileocolon	Inverse variance weighted (multiplicative random effects)	2.11526	16.4473	0.272039	0.474028	0.200686
495	Isovalerate	Crohn's disease of ileocolon	MR Egger	3.04e-12	1.38e+46	6.68e-70	0.59002	0.173386
495	Isovalerate	Crohn's disease of ileocolon	Inverse variance weighted (fixed effects)	2.11526	15.1737	0.294872	0.456135	0.200686
495	Isovalerate	Crohn's disease of ileocolon	Weighted median	1.85829	21.0796	0.163818	0.617018	0.138013
495	Isovalerate	Crohn's disease of ileocolon	Weighted mode	1.48879	36.7393	0.0603306	0.823456	0.0779233
495	Isovalerate	Crohn's disease of ileocolon	MR RAPS	2.17384	17.6903	0.267128	0.467882	0.217324
496	X-13183--stearamide	Crohn's disease of ileocolon	Inverse variance weighted (multiplicative random effects)	1.01484	1.58534	0.649638	0.948401	0.050367
496	X-13183--stearamide	Crohn's disease of ileocolon	MR Egger	2.21189	8.54834	0.57233	0.220698	0.995976
496	X-13183--stearamide	Crohn's disease of ileocolon	Inverse variance weighted (fixed effects)	1.01484	1.74703	0.589511	0.957617	0.050367
496	X-13183--stearamide	Crohn's disease of ileocolon	Weighted median	1.2729	2.73115	0.593255	0.53559	0.180042
496	X-13183--stearamide	Crohn's disease of ileocolon	Weighted mode	1.16805	2.57685	0.52946	0.709329	0.0981598
496	X-13183--stearamide	Crohn's disease of ileocolon	MR RAPS	1.01515	1.80859	0.5698	0.959294	0.0503827
497	7-methylguanine	Crohn's disease of ileocolon	Inverse variance weighted (multiplicative random effects)	1.06236	2.97932	0.378814	0.908462	0.051532
497	7-methylguanine	Crohn's disease of ileocolon	MR Egger	0.51641	12.4769	0.0213738	0.641083	0.146664
497	7-methylguanine	Crohn's disease of ileocolon	Inverse variance weighted (fixed effects)	1.06236	2.91183	0.387594	0.906391	0.051532
497	7-methylguanine	Crohn's disease of ileocolon	Weighted median	0.670134	2.41841	0.185692	0.540996	0.0940417
497	7-methylguanine	Crohn's disease of ileocolon	Weighted mode	0.598945	2.77626	0.129215	0.533353	0.115741
497	7-methylguanine	Crohn's disease of ileocolon	MR RAPS	1.06442	3.10831	0.364501	0.9091	0.0516347
500	N2,N2-dimethylguanosine	Crohn's disease of ileocolon	MR RAPS	1.32954	379.911	0.0046529	0.92136	0.0516059
501	Cysteine-glutathione disulfide	Crohn's disease of ileocolon	MR RAPS	2.02662	7.9444	0.51699	0.310843	0.334945
504	X-13431--nonanoylcarnitine*	Crohn's disease of ileocolon	MR RAPS	0.512968	2.56573	0.102558	0.41635	0.0979597
505	2-palmitoylglycerophosphocholine*	Crohn's disease of ileocolon	Inverse variance weighted (multiplicative random effects)	1.35211	3.32532	0.549781	0.51116	0.0977978
505	2-palmitoylglycerophosphocholine*	Crohn's disease of ileocolon	MR Egger	0.342988	1.99284	0.0590315	0.215876	0.224061
505	2-palmitoylglycerophosphocholine*	Crohn's disease of ileocolon	Inverse variance weighted (fixed effects)	1.35211	3.69441	0.494855	0.556378	0.0977978
505	2-palmitoylglycerophosphocholine*	Crohn's disease of ileocolon	Weighted median	0.647936	2.93264	0.143155	0.573204	0.0981854
505	2-palmitoylglycerophosphocholine*	Crohn's disease of ileocolon	Weighted mode	0.727893	2.90923	0.18212	0.659639	0.0784933
505	2-palmitoylglycerophosphocholine*	Crohn's disease of ileocolon	MR RAPS	1.37698	4.0027	0.473698	0.556817	0.104938
506	2-oleoylglycerophosphocholine*	Crohn's disease of ileocolon	Inverse variance weighted (multiplicative random effects)	2.12953	6.26179	0.724217	0.169552	0.467717
506	2-oleoylglycerophosphocholine*	Crohn's disease of ileocolon	MR Egger	0.337402	32.2891	0.00352566	0.620924	0.199014
506	2-oleoylglycerophosphocholine*	Crohn's disease of ileocolon	Inverse variance weighted (fixed effects)	2.12953	7.09274	0.639372	0.218178	0.467717
506	2-oleoylglycerophosphocholine*	Crohn's disease of ileocolon	Weighted median	2.85504	14.4083	0.565732	0.20399	0.87113
506	2-oleoylglycerophosphocholine*	Crohn's disease of ileocolon	Weighted mode	2.42297	38.7103	0.151659	0.540172	0.658362
506	2-oleoylglycerophosphocholine*	Crohn's disease of ileocolon	MR RAPS	2.18732	7.81169	0.612465	0.228156	0.50605
507	2-stearoylglycerophosphocholine*	Crohn's disease of ileocolon	MR RAPS	1.44317	89.6986	0.0232193	0.861778	0.0585727
508	2-linoleoylglycerophosphocholine*	Crohn's disease of ileocolon	MR RAPS	4.24907	214.415	0.084204	0.469602	0.411334
509	1-palmitoylglycerophosphoinositol*	Crohn's disease of ileocolon	Inverse variance weighted (multiplicative random effects)	0.903851	2.42405	0.337017	0.840821	0.055341
509	1-palmitoylglycerophosphoinositol*	Crohn's disease of ileocolon	MR Egger	1.39614	23.9111	0.0815185	0.794281	0.143645
509	1-palmitoylglycerophosphoinositol*	Crohn's disease of ileocolon	Inverse variance weighted (fixed effects)	0.903851	2.28252	0.357914	0.830635	0.055341
509	1-palmitoylglycerophosphoinositol*	Crohn's disease of ileocolon	Weighted median	1.51691	5.64669	0.407499	0.534375	0.211557
509	1-palmitoylglycerophosphoinositol*	Crohn's disease of ileocolon	Weighted mode	1.95708	8.03746	0.476538	0.378796	0.57085
509	1-palmitoylglycerophosphoinositol*	Crohn's disease of ileocolon	MR RAPS	0.898934	2.37268	0.340579	0.82964	0.0559035
511	Hydroxyisovaleroyl carnitine	Crohn's disease of ileocolon	Inverse variance weighted (multiplicative random effects)	0.794782	63.4473	0.00995594	0.918134	0.0558207
511	Hydroxyisovaleroyl carnitine	Crohn's disease of ileocolon	Inverse variance weighted (fixed effects)	0.794782	4.57432	0.138092	0.797002	0.0558207
511	Hydroxyisovaleroyl carnitine	Crohn's disease of ileocolon	MR RAPS	0.782799	4.48587	0.136601	0.783376	0.056524
512	Glutaroyl carnitine	Crohn's disease of ileocolon	Inverse variance weighted (multiplicative random effects)	1.97293	3.25598	1.19548	0.0078479	0.475173
512	Glutaroyl carnitine	Crohn's disease of ileocolon	MR Egger	1.3174	385.707	0.00449961	0.906728	0.095051
512	Glutaroyl carnitine	Crohn's disease of ileocolon	Inverse variance weighted (fixed effects)	1.97293	5.48464	0.709702	0.192697	0.475173
512	Glutaroyl carnitine	Crohn's disease of ileocolon	Weighted median	2.20009	7.66008	0.631897	0.215414	0.648347
512	Glutaroyl carnitine	Crohn's disease of ileocolon	Weighted mode	2.42171	10.6066	0.552929	0.29337	0.79223
512	Glutaroyl carnitine	Crohn's disease of ileocolon	MR RAPS	1.97568	5.57799	0.699769	0.198502	0.477304
514	4-hydroxyhippurate	Crohn's disease of ileocolon	Inverse variance weighted (multiplicative random effects)	0.840928	1.37152	0.515604	0.487571	0.0800331
514	4-hydroxyhippurate	Crohn's disease of ileocolon	MR Egger	1.25872	33.9957	0.046605	0.874312	0.13069
514	4-hydroxyhippurate	Crohn's disease of ileocolon	Inverse variance weighted (fixed effects)	0.840928	1.56311	0.452405	0.583859	0.0800331
514	4-hydroxyhippurate	Crohn's disease of ileocolon	Weighted median	1.02631	2.29999	0.45796	0.949713	0.0508065
514	4-hydroxyhippurate	Crohn's disease of ileocolon	Weighted mode	1.24413	3.99989	0.386973	0.724746	0.121637
514	4-hydroxyhippurate	Crohn's disease of ileocolon	MR RAPS	0.836764	1.61675	0.433076	0.595876	0.0816523
515	1-myristoylglycerophosphocholine	Crohn's disease of ileocolon	Inverse variance weighted (multiplicative random effects)	0.883487	1.56915	0.497434	0.672518	0.0546496
515	1-myristoylglycerophosphocholine	Crohn's disease of ileocolon	MR Egger	1.72892	56.3144	0.0530802	0.692059	0.240879
515	1-myristoylglycerophosphocholine	Crohn's disease of ileocolon	Inverse variance weighted (fixed effects)	0.883487	2.55944	0.304968	0.819438	0.0546496
515	1-myristoylglycerophosphocholine	Crohn's disease of ileocolon	Weighted median	0.988722	3.70728	0.26369	0.98658	0.0500434
515	1-myristoylglycerophosphocholine	Crohn's disease of ileocolon	Weighted mode	0.975359	3.85654	0.246679	0.973328	0.0502072
515	1-myristoylglycerophosphocholine	Crohn's disease of ileocolon	MR RAPS	0.882937	2.78783	0.279636	0.831922	0.0546938
518	3-(3-hydroxyphenyl)propionate	Crohn's disease of ileocolon	Inverse variance weighted (multiplicative random effects)	0.916024	1.33797	0.627145	0.649993	0.0798052
518	3-(3-hydroxyphenyl)propionate	Crohn's disease of ileocolon	MR Egger	1.73408	6.1954	0.485367	0.338537	0.992831
518	3-(3-hydroxyphenyl)propionate	Crohn's disease of ileocolon	Inverse variance weighted (fixed effects)	0.916024	1.26533	0.663146	0.594603	0.0798052
518	3-(3-hydroxyphenyl)propionate	Crohn's disease of ileocolon	Weighted median	0.905751	1.41816	0.578487	0.665199	0.0876872
518	3-(3-hydroxyphenyl)propionate	Crohn's disease of ileocolon	Weighted mode	0.864486	1.60185	0.466546	0.659848	0.129219
518	3-(3-hydroxyphenyl)propionate	Crohn's disease of ileocolon	MR RAPS	0.909847	1.27446	0.649548	0.582668	0.0844293
519	Tetradecanedioate	Crohn's disease of ileocolon	MR RAPS	1.69757	6.31839	0.456088	0.429991	0.143638
520	2-hydroxypalmitate	Crohn's disease of ileocolon	MR RAPS	0.110834	102.187	0.000120212	0.527665	0.0583177
521	Hexadecanedioate	Crohn's disease of ileocolon	MR RAPS	2.22829	9.52546	0.521262	0.279694	0.338169
522	Dihomo-linolenate (20:3n3 or n6)	Crohn's disease of ileocolon	Inverse variance weighted (multiplicative random effects)	0.124167	0.557632	0.0276481	0.00648659	0.135435
522	Dihomo-linolenate (20:3n3 or n6)	Crohn's disease of ileocolon	Inverse variance weighted (fixed effects)	0.124167	1.28825	0.0119678	0.0804994	0.135435
522	Dihomo-linolenate (20:3n3 or n6)	Crohn's disease of ileocolon	MR RAPS	0.123593	1.38525	0.011027	0.0899429	0.135551
523	Threitol	Crohn's disease of ileocolon	Inverse variance weighted (multiplicative random effects)	1.03741	2.25214	0.477864	0.926015	0.0509426
523	Threitol	Crohn's disease of ileocolon	MR Egger	0.553644	4.82299	0.0635544	0.56111	0.192158
523	Threitol	Crohn's disease of ileocolon	Inverse variance weighted (fixed effects)	1.03741	2.33551	0.460806	0.92932	0.0509426
523	Threitol	Crohn's disease of ileocolon	Weighted median	0.670001	2.09743	0.214024	0.491567	0.126303
523	Threitol	Crohn's disease of ileocolon	Weighted mode	0.627539	2.49905	0.157582	0.522283	0.147905
523	Threitol	Crohn's disease of ileocolon	MR RAPS	1.03879	2.45221	0.440048	0.930794	0.0510137
524	P-cresol sulfate	Crohn's disease of ileocolon	Inverse variance weighted (multiplicative random effects)	0.992932	1.51445	0.651006	0.973727	0.0500977
524	P-cresol sulfate	Crohn's disease of ileocolon	MR Egger	1.01274	2.16555	0.473619	0.971695	0.0503174
524	P-cresol sulfate	Crohn's disease of ileocolon	Inverse variance weighted (fixed effects)	0.992932	1.54358	0.638721	0.974861	0.0500977
524	P-cresol sulfate	Crohn's disease of ileocolon	Weighted median	1.27272	2.39202	0.677171	0.453807	0.202878
524	P-cresol sulfate	Crohn's disease of ileocolon	Weighted mode	1.39421	2.66609	0.72909	0.334851	0.369134
524	P-cresol sulfate	Crohn's disease of ileocolon	MR RAPS	0.992612	1.57653	0.624967	0.974939	0.0501067
525	X-14189--leucylalanine	Crohn's disease of ileocolon	MR RAPS	0.588121	1.73006	0.199927	0.334917	0.12096
526	X-14205--alpha-glutamyltyrosine	Crohn's disease of ileocolon	MR RAPS	0.493743	2.11065	0.115501	0.341011	0.110493
527	X-14208--phenylalanylserine	Crohn's disease of ileocolon	Inverse variance weighted (multiplicative random effects)	0.687212	0.950213	0.497004	0.0232748	0.117262
527	X-14208--phenylalanylserine	Crohn's disease of ileocolon	Inverse variance weighted (fixed effects)	0.687212	1.59531	0.296031	0.382664	0.117262
527	X-14208--phenylalanylserine	Crohn's disease of ileocolon	MR RAPS	0.686941	1.63428	0.288744	0.395779	0.117382
528	X-14304--leucylalanine	Crohn's disease of ileocolon	MR RAPS	0.55822	1.84108	0.169254	0.338295	0.117435
529	X-14450--phenylalanylleucine	Crohn's disease of ileocolon	Inverse variance weighted (multiplicative random effects)	1.20108	1.93043	0.747289	0.449179	0.0765864
529	X-14450--phenylalanylleucine	Crohn's disease of ileocolon	MR Egger	0.146718	243.235	8.85e-05	0.496606	0.534293
529	X-14450--phenylalanylleucine	Crohn's disease of ileocolon	Inverse variance weighted (fixed effects)	1.20108	2.81098	0.513198	0.672785	0.0765864
529	X-14450--phenylalanylleucine	Crohn's disease of ileocolon	Weighted median	1.20509	3.2756	0.443351	0.714615	0.0776714
529	X-14450--phenylalanylleucine	Crohn's disease of ileocolon	Weighted mode	0.795053	2.5222	0.250618	0.722996	0.0777658
529	X-14450--phenylalanylleucine	Crohn's disease of ileocolon	MR RAPS	1.20405	2.97834	0.48676	0.687787	0.077388
530	Gamma-glutamylglutamate	Crohn's disease of ileocolon	Inverse variance weighted (multiplicative random effects)	0.74606	1.34799	0.412915	0.33174	0.155374
530	Gamma-glutamylglutamate	Crohn's disease of ileocolon	MR Egger	0.539516	4.0969	0.0710481	0.505395	0.399292
530	Gamma-glutamylglutamate	Crohn's disease of ileocolon	Inverse variance weighted (fixed effects)	0.74606	1.33065	0.418297	0.321032	0.155374
530	Gamma-glutamylglutamate	Crohn's disease of ileocolon	Weighted median	0.763702	1.75969	0.331446	0.526734	0.140857
530	Gamma-glutamylglutamate	Crohn's disease of ileocolon	Weighted mode	0.829992	1.97493	0.348816	0.684619	0.0962455
530	Gamma-glutamylglutamate	Crohn's disease of ileocolon	MR RAPS	0.739574	1.36836	0.399727	0.336555	0.16099
531	Octadecanedioate	Crohn's disease of ileocolon	Inverse variance weighted (multiplicative random effects)	0.946605	5.78338	0.154937	0.952613	0.0505462
531	Octadecanedioate	Crohn's disease of ileocolon	Inverse variance weighted (fixed effects)	0.946605	5.54834	0.161501	0.951503	0.0505462
531	Octadecanedioate	Crohn's disease of ileocolon	MR RAPS	0.946089	5.77167	0.155082	0.952104	0.0505568
532	Leucylleucine	Crohn's disease of ileocolon	Inverse variance weighted (multiplicative random effects)	1.12671	2.49209	0.509397	0.768336	0.0597572
532	Leucylleucine	Crohn's disease of ileocolon	MR Egger	2.13812	41.3871	0.110459	0.572835	0.741623
532	Leucylleucine	Crohn's disease of ileocolon	Inverse variance weighted (fixed effects)	1.12671	2.55657	0.49655	0.775361	0.0597572
532	Leucylleucine	Crohn's disease of ileocolon	Weighted median	1.46763	4.41968	0.487354	0.495177	0.188643
532	Leucylleucine	Crohn's disease of ileocolon	Weighted mode	1.83067	6.81479	0.491779	0.393561	0.477662
532	Leucylleucine	Crohn's disease of ileocolon	MR RAPS	1.13146	2.68318	0.477117	0.77922	0.0605064
533	7-alpha-hydroxy-3-oxo-4-cholestenoate (7-Hoca)	Crohn's disease of ileocolon	Inverse variance weighted (multiplicative random effects)	0.708371	5.04931	0.0993778	0.730787	0.0613072
533	7-alpha-hydroxy-3-oxo-4-cholestenoate (7-Hoca)	Crohn's disease of ileocolon	MR Egger	0.0825818	46.0501	0.000148094	0.398347	0.167835
533	7-alpha-hydroxy-3-oxo-4-cholestenoate (7-Hoca)	Crohn's disease of ileocolon	Inverse variance weighted (fixed effects)	0.708371	3.93028	0.127673	0.693294	0.0613072
533	7-alpha-hydroxy-3-oxo-4-cholestenoate (7-Hoca)	Crohn's disease of ileocolon	Weighted median	0.494426	5.36469	0.0455678	0.562564	0.0845095
533	7-alpha-hydroxy-3-oxo-4-cholestenoate (7-Hoca)	Crohn's disease of ileocolon	Weighted mode	0.341036	9.92954	0.0117131	0.547217	0.109416
533	7-alpha-hydroxy-3-oxo-4-cholestenoate (7-Hoca)	Crohn's disease of ileocolon	MR RAPS	0.6949	4.15837	0.116124	0.690075	0.0623859
534	N-Butyl Oleate	Crohn's disease of ileocolon	Inverse variance weighted (multiplicative random effects)	1.3075	4.52675	0.377656	0.672185	0.0706147
534	N-Butyl Oleate	Crohn's disease of ileocolon	MR Egger	1.27961	7873.09	0.000207974	0.948894	0.0670162
534	N-Butyl Oleate	Crohn's disease of ileocolon	Inverse variance weighted (fixed effects)	1.3075	5.48408	0.31173	0.71397	0.0706147
534	N-Butyl Oleate	Crohn's disease of ileocolon	Weighted median	1.43564	9.34469	0.220558	0.70516	0.0917584
534	N-Butyl Oleate	Crohn's disease of ileocolon	Weighted mode	3.06244	73.1761	0.128164	0.511699	0.808871
534	N-Butyl Oleate	Crohn's disease of ileocolon	MR RAPS	1.3205	6.0239	0.289465	0.71958	0.0724129
535	Dimethylarginine (SDMA + ADMA)	Crohn's disease of ileocolon	MR RAPS	2.03432	2635.37	0.00157036	0.846001	0.0587417
536	Taurolithocholate 3-sulfate	Crohn's disease of ileocolon	Inverse variance weighted (multiplicative random effects)	0.777544	1.24312	0.486336	0.293264	0.138266
536	Taurolithocholate 3-sulfate	Crohn's disease of ileocolon	MR Egger	1.21046	4.93563	0.296863	0.758851	0.12836
536	Taurolithocholate 3-sulfate	Crohn's disease of ileocolon	Inverse variance weighted (fixed effects)	0.777544	1.36718	0.442205	0.382206	0.138266
536	Taurolithocholate 3-sulfate	Crohn's disease of ileocolon	Weighted median	1.00429	2.1318	0.473125	0.991096	0.0500316
536	Taurolithocholate 3-sulfate	Crohn's disease of ileocolon	Weighted mode	1.23715	3.35969	0.45556	0.688814	0.150118
536	Taurolithocholate 3-sulfate	Crohn's disease of ileocolon	MR RAPS	0.771574	1.4081	0.422785	0.398158	0.14321
537	X-14977--vanillin	Crohn's disease of ileocolon	Inverse variance weighted (multiplicative random effects)	1.07616	3.54393	0.326792	0.903919	0.0528212
537	X-14977--vanillin	Crohn's disease of ileocolon	MR Egger	12.7874	178.302	0.91709	0.0622032	1
537	X-14977--vanillin	Crohn's disease of ileocolon	Inverse variance weighted (fixed effects)	1.07616	2.87035	0.403479	0.883408	0.0528212
537	X-14977--vanillin	Crohn's disease of ileocolon	Weighted median	0.801027	3.2764	0.195839	0.757544	0.0695014
537	X-14977--vanillin	Crohn's disease of ileocolon	Weighted mode	3.99485	32.3501	0.493315	0.235464	0.99999
537	X-14977--vanillin	Crohn's disease of ileocolon	MR RAPS	1.08291	2.98256	0.393186	0.87753	0.0533442
538	Succinylcarnitine	Crohn's disease of ileocolon	Inverse variance weighted (multiplicative random effects)	2.54055	12.9639	0.497872	0.262166	0.606297
538	Succinylcarnitine	Crohn's disease of ileocolon	MR Egger	13.6048	1221.99	0.151465	0.205485	1
538	Succinylcarnitine	Crohn's disease of ileocolon	Inverse variance weighted (fixed effects)	2.54055	10.1617	0.635169	0.187409	0.606297
538	Succinylcarnitine	Crohn's disease of ileocolon	Weighted median	3.82904	18.0102	0.81407	0.0892069	0.985005
538	Succinylcarnitine	Crohn's disease of ileocolon	Weighted mode	4.39423	22.0285	0.876555	0.146271	0.998777
538	Succinylcarnitine	Crohn's disease of ileocolon	MR RAPS	2.56327	10.3843	0.632717	0.187262	0.618946
540	Cyclo(leu-pro)	Crohn's disease of ileocolon	Inverse variance weighted (multiplicative random effects)	0.766228	1.38398	0.424214	0.377388	0.11025
540	Cyclo(leu-pro)	Crohn's disease of ileocolon	MR Egger	0.895117	11.1902	0.0716015	0.925575	0.0618374
540	Cyclo(leu-pro)	Crohn's disease of ileocolon	Inverse variance weighted (fixed effects)	0.766228	1.47438	0.398206	0.425225	0.11025
540	Cyclo(leu-pro)	Crohn's disease of ileocolon	Weighted median	1.04611	2.54269	0.430384	0.920765	0.0522707
540	Cyclo(leu-pro)	Crohn's disease of ileocolon	Weighted mode	1.03221	5.20818	0.204576	0.970003	0.051108
540	Cyclo(leu-pro)	Crohn's disease of ileocolon	MR RAPS	0.759073	1.51542	0.380219	0.434509	0.114093
541	Chiro-inositol	Crohn's disease of ileocolon	Inverse variance weighted (multiplicative random effects)	0.951173	1.15353	0.784314	0.61098	0.0794408
541	Chiro-inositol	Crohn's disease of ileocolon	MR Egger	1.11597	1.87424	0.664477	0.651349	0.222457
541	Chiro-inositol	Crohn's disease of ileocolon	Inverse variance weighted (fixed effects)	0.951173	1.14593	0.789514	0.598386	0.0794408
541	Chiro-inositol	Crohn's disease of ileocolon	Weighted median	0.948645	1.20763	0.745205	0.668582	0.0826184
541	Chiro-inositol	Crohn's disease of ileocolon	Weighted mode	0.997748	1.27865	0.778557	0.986108	0.0500616
541	Chiro-inositol	Crohn's disease of ileocolon	MR RAPS	0.94973	1.15776	0.779076	0.609778	0.0812342
542	5alpha-androstan-3beta,17beta-diol disulfate	Crohn's disease of ileocolon	MR RAPS	0.795658	1.28727	0.491792	0.351733	0.0794951
543	4-androsten-3beta,17beta-diol disulfate 1*	Crohn's disease of ileocolon	MR RAPS	0.519309	1.93686	0.139237	0.329226	0.0876511
544	4-androsten-3beta,17beta-diol disulfate 2*	Crohn's disease of ileocolon	MR RAPS	0.302556	2.71761	0.0336841	0.2858	0.103483
545	2-hydroxyglutarate	Crohn's disease of ileocolon	Inverse variance weighted (multiplicative random effects)	1.24945	3.3102	0.471612	0.654142	0.0805746
545	2-hydroxyglutarate	Crohn's disease of ileocolon	MR Egger	0.385443	3.67695	0.0404048	0.374108	0.245647
545	2-hydroxyglutarate	Crohn's disease of ileocolon	Inverse variance weighted (fixed effects)	1.24945	3.07482	0.507715	0.62788	0.0805746
545	2-hydroxyglutarate	Crohn's disease of ileocolon	Weighted median	0.750464	2.6063	0.216091	0.651323	0.0807753
545	2-hydroxyglutarate	Crohn's disease of ileocolon	Weighted mode	0.895216	4.85554	0.165051	0.900217	0.055343
545	2-hydroxyglutarate	Crohn's disease of ileocolon	MR RAPS	1.2607	3.26261	0.487142	0.632987	0.0834352
546	Ergothioneine	Crohn's disease of ileocolon	Inverse variance weighted (multiplicative random effects)	1.06047	1.88063	0.597984	0.840814	0.0530969
546	Ergothioneine	Crohn's disease of ileocolon	MR Egger	0.781527	668.605	0.000913521	0.900804	0.0913807
546	Ergothioneine	Crohn's disease of ileocolon	Inverse variance weighted (fixed effects)	1.06047	2.41896	0.464905	0.889024	0.0530969
546	Ergothioneine	Crohn's disease of ileocolon	Weighted median	1.15145	3.06181	0.433023	0.777466	0.0695902
546	Ergothioneine	Crohn's disease of ileocolon	Weighted mode	0.712455	2.10245	0.241429	0.601711	0.122637
546	Ergothioneine	Crohn's disease of ileocolon	MR RAPS	1.06166	2.56831	0.438858	0.894389	0.0532207
548	Phenylalanylphenylalanine	Crohn's disease of ileocolon	Inverse variance weighted (multiplicative random effects)	0.436104	0.504075	0.377299	2.91e-29	0.126745
548	Phenylalanylphenylalanine	Crohn's disease of ileocolon	MR Egger	0.462389	458.955	0.000465848	0.756047	0.119553
548	Phenylalanylphenylalanine	Crohn's disease of ileocolon	Inverse variance weighted (fixed effects)	0.436104	1.76392	0.10782	0.244435	0.126745
548	Phenylalanylphenylalanine	Crohn's disease of ileocolon	Weighted median	0.43733	2.33268	0.0819905	0.332885	0.126401
548	Phenylalanylphenylalanine	Crohn's disease of ileocolon	Weighted mode	0.439732	2.62623	0.0736281	0.433969	0.12573
548	Phenylalanylphenylalanine	Crohn's disease of ileocolon	MR RAPS	0.435905	1.97154	0.0963783	0.280859	0.126801
549	Cis-4-decenoyl carnitine	Crohn's disease of ileocolon	Inverse variance weighted (multiplicative random effects)	1.4656	2.6352	0.815106	0.201591	0.149418
549	Cis-4-decenoyl carnitine	Crohn's disease of ileocolon	Inverse variance weighted (fixed effects)	1.4656	4.21014	0.51019	0.477694	0.149418
549	Cis-4-decenoyl carnitine	Crohn's disease of ileocolon	MR RAPS	1.46612	4.25408	0.505282	0.481437	0.149648
550	15-methylpalmitate (isobar with 2-methylpalmitate)	Crohn's disease of ileocolon	Inverse variance weighted (multiplicative random effects)	0.827777	2.3327	0.293743	0.72066	0.0598386
550	15-methylpalmitate (isobar with 2-methylpalmitate)	Crohn's disease of ileocolon	MR Egger	0.737814	9.32063	0.0584049	0.800028	0.0729931
550	15-methylpalmitate (isobar with 2-methylpalmitate)	Crohn's disease of ileocolon	Inverse variance weighted (fixed effects)	0.827777	2.60501	0.263037	0.746589	0.0598386
550	15-methylpalmitate (isobar with 2-methylpalmitate)	Crohn's disease of ileocolon	Weighted median	0.948758	4.7383	0.189971	0.948886	0.0508651
550	15-methylpalmitate (isobar with 2-methylpalmitate)	Crohn's disease of ileocolon	Weighted mode	2.89678	43.0242	0.195038	0.453565	0.894844
550	15-methylpalmitate (isobar with 2-methylpalmitate)	Crohn's disease of ileocolon	MR RAPS	0.820454	2.7322	0.246375	0.747131	0.0606993
551	Glutamine	Crohn's disease of small intestine	MR RAPS	3.60778	880.718	0.014779	0.647352	0.159725
552	Tryptophan	Crohn's disease of small intestine	Inverse variance weighted (multiplicative random effects)	0.553958	7.18363	0.042718	0.651419	0.0594607
552	Tryptophan	Crohn's disease of small intestine	MR Egger	0.105946	3.74e+17	3e-20	0.911961	0.0889058
552	Tryptophan	Crohn's disease of small intestine	Inverse variance weighted (fixed effects)	0.553958	12.2855	0.0249783	0.708729	0.0594607
552	Tryptophan	Crohn's disease of small intestine	Weighted median	0.644694	40.9094	0.0101598	0.835769	0.0559827
552	Tryptophan	Crohn's disease of small intestine	Weighted mode	0.516048	1661.31	0.000160299	0.874751	0.0611548
552	Tryptophan	Crohn's disease of small intestine	MR RAPS	0.547499	13.5561	0.0221122	0.712944	0.0597393
554	Leucine	Crohn's disease of small intestine	Inverse variance weighted (multiplicative random effects)	3.43027	75.2138	0.156444	0.43395	0.284924
554	Leucine	Crohn's disease of small intestine	MR Egger	21053703034	1.07e+21	0.416065	0.0601476	1
554	Leucine	Crohn's disease of small intestine	Inverse variance weighted (fixed effects)	3.43027	108.955	0.107997	0.484801	0.284924
554	Leucine	Crohn's disease of small intestine	Weighted median	9.65683	1268.63	0.0735078	0.362215	0.999969
554	Leucine	Crohn's disease of small intestine	Weighted mode	17.7409	44044.7	0.00714593	0.487378	1
554	Leucine	Crohn's disease of small intestine	MR RAPS	3.51431	124.848	0.098923	0.490206	0.301728
556	Phenylalanine	Crohn's disease of small intestine	MR RAPS	0.34482	2161.29	5.5e-05	0.811349	0.0526809
558	Lactate	Crohn's disease of small intestine	Inverse variance weighted (multiplicative random effects)	0.527969	1.61433	0.172673	0.262664	0.0760375
558	Lactate	Crohn's disease of small intestine	MR Egger	1.58495	936.84	0.00268142	0.872538	0.0898034
558	Lactate	Crohn's disease of small intestine	Inverse variance weighted (fixed effects)	0.527969	3.33949	0.0834713	0.497328	0.0760375
558	Lactate	Crohn's disease of small intestine	Weighted median	0.554712	5.40595	0.0569198	0.611939	0.0731267
558	Lactate	Crohn's disease of small intestine	Weighted mode	0.623691	14.5168	0.0267959	0.776246	0.066441
558	Lactate	Crohn's disease of small intestine	MR RAPS	0.523759	3.77757	0.072619	0.521165	0.0765121
559	3-hydroxybutyrate (BHBA)	Crohn's disease of small intestine	Inverse variance weighted (multiplicative random effects)	1.13534	1.40475	0.917591	0.242663	0.0991036
559	3-hydroxybutyrate (BHBA)	Crohn's disease of small intestine	MR Egger	1.23762	2.17039	0.705724	0.41049	0.205613
559	3-hydroxybutyrate (BHBA)	Crohn's disease of small intestine	Inverse variance weighted (fixed effects)	1.13534	1.61655	0.797368	0.481417	0.0991036
559	3-hydroxybutyrate (BHBA)	Crohn's disease of small intestine	Weighted median	1.05223	1.65933	0.667247	0.826607	0.0571688
559	3-hydroxybutyrate (BHBA)	Crohn's disease of small intestine	Weighted mode	1.11574	1.77005	0.703296	0.654243	0.0857076
559	3-hydroxybutyrate (BHBA)	Crohn's disease of small intestine	MR RAPS	1.1365	1.65941	0.778371	0.507602	0.0999697
560	Arabinose	Crohn's disease of small intestine	Inverse variance weighted (multiplicative random effects)	0.717943	0.985807	0.522863	0.0405244	0.0815828
560	Arabinose	Crohn's disease of small intestine	MR Egger	0.707233	3.53956	0.141311	0.564313	0.084072
560	Arabinose	Crohn's disease of small intestine	Inverse variance weighted (fixed effects)	0.717943	1.32178	0.389961	0.287277	0.0815828
560	Arabinose	Crohn's disease of small intestine	Weighted median	0.733335	1.48465	0.362226	0.388763	0.0781772
560	Arabinose	Crohn's disease of small intestine	Weighted mode	0.772854	1.46475	0.407786	0.487262	0.0703525
560	Arabinose	Crohn's disease of small intestine	MR RAPS	0.715111	1.395	0.366584	0.325333	0.0822314
561	Fructose	Crohn's disease of small intestine	Inverse variance weighted (multiplicative random effects)	4.53833	17.0999	1.20447	0.0254247	0.935917
561	Fructose	Crohn's disease of small intestine	MR Egger	0.549206	6.26553e+06	4.81e-08	0.899818	0.0722843
561	Fructose	Crohn's disease of small intestine	Inverse variance weighted (fixed effects)	4.53833	38.6659	0.532677	0.166425	0.935917
561	Fructose	Crohn's disease of small intestine	Weighted median	6.18787	87.7107	0.436546	0.177887	0.999536
561	Fructose	Crohn's disease of small intestine	Weighted mode	7.90882	170.359	0.367162	0.31758	1
561	Fructose	Crohn's disease of small intestine	MR RAPS	4.58908	46.3087	0.454766	0.196393	0.942244
563	Pyruvate	Crohn's disease of small intestine	Inverse variance weighted (multiplicative random effects)	1.61979	4.62589	0.567183	0.36768	0.244137
563	Pyruvate	Crohn's disease of small intestine	MR Egger	0.154485	3.70437	0.00644253	0.224811	0.41355
563	Pyruvate	Crohn's disease of small intestine	Inverse variance weighted (fixed effects)	1.61979	4.17753	0.628056	0.318395	0.244137
563	Pyruvate	Crohn's disease of small intestine	Weighted median	1.02525	3.88073	0.27086	0.970711	0.0503056
563	Pyruvate	Crohn's disease of small intestine	Weighted mode	0.888116	4.17896	0.188743	0.883354	0.0560305
563	Pyruvate	Crohn's disease of small intestine	MR RAPS	1.66596	4.51739	0.614386	0.315928	0.274381
564	Uridine	Crohn's disease of small intestine	MR RAPS	1.39441	6995.4	0.000277951	0.939038	0.0513588
565	Linoleate (18:2n6)	Crohn's disease of small intestine	Inverse variance weighted (multiplicative random effects)	2.74966	9.97446	0.758001	0.123914	0.63057
565	Linoleate (18:2n6)	Crohn's disease of small intestine	MR Egger	93.9799	57521.7	0.153546	0.152829	1
565	Linoleate (18:2n6)	Crohn's disease of small intestine	Inverse variance weighted (fixed effects)	2.74966	11.8837	0.636222	0.175591	0.63057
565	Linoleate (18:2n6)	Crohn's disease of small intestine	Weighted median	2.81028	19.9616	0.395644	0.3016	0.660348
565	Linoleate (18:2n6)	Crohn's disease of small intestine	Weighted mode	4.17151	172.309	0.10099	0.464316	0.987601
565	Linoleate (18:2n6)	Crohn's disease of small intestine	MR RAPS	2.84242	13.295	0.607696	0.184441	0.675765
566	Allantoin	Crohn's disease of small intestine	Inverse variance weighted (multiplicative random effects)	0.383776	1.05967	0.138991	0.0645791	0.339314
566	Allantoin	Crohn's disease of small intestine	MR Egger	0.842447	26.7841	0.0264977	0.916502	0.0679314
566	Allantoin	Crohn's disease of small intestine	Inverse variance weighted (fixed effects)	0.383776	0.826426	0.178218	0.0143994	0.339314
566	Allantoin	Crohn's disease of small intestine	Weighted median	0.424543	1.41093	0.127744	0.162056	0.30267
566	Allantoin	Crohn's disease of small intestine	Weighted mode	0.608796	2.2499	0.164733	0.470036	0.164949
566	Allantoin	Crohn's disease of small intestine	MR RAPS	0.346242	0.790873	0.151584	0.0118453	0.374531
568	Deoxycholate	Crohn's disease of small intestine	MR RAPS	2.90004	18.9251	0.444394	0.265908	0.55047
569	Margarate (17:0)	Crohn's disease of small intestine	MR RAPS	0.131213	4.33126	0.00397501	0.254968	0.0962894
570	Inosine	Crohn's disease of small intestine	MR RAPS	1.29043	3.30204	0.504296	0.5948	0.100059
571	Isoleucine	Crohn's disease of small intestine	Inverse variance weighted (multiplicative random effects)	2.40426	18.5474	0.311658	0.400031	0.28066
571	Isoleucine	Crohn's disease of small intestine	MR Egger	3.73136	733.02	0.0189941	0.604789	0.770567
571	Isoleucine	Crohn's disease of small intestine	Inverse variance weighted (fixed effects)	2.40426	16.7677	0.344738	0.376008	0.28066
571	Isoleucine	Crohn's disease of small intestine	Weighted median	1.90579	31.5901	0.114974	0.652603	0.144154
571	Isoleucine	Crohn's disease of small intestine	Weighted mode	1.58729	62.4038	0.0403739	0.808321	0.0888292
571	Isoleucine	Crohn's disease of small intestine	MR RAPS	2.505	19.3752	0.323868	0.378959	0.314866
572	Threonine	Crohn's disease of small intestine	Inverse variance weighted (multiplicative random effects)	1.42424	5.35692	0.378659	0.600828	0.0855432
572	Threonine	Crohn's disease of small intestine	MR Egger	0.0557855	51.7049	6.02e-05	0.377063	0.236424
572	Threonine	Crohn's disease of small intestine	Inverse variance weighted (fixed effects)	1.42424	6.47384	0.313329	0.647118	0.0855432
572	Threonine	Crohn's disease of small intestine	Weighted median	0.669824	5.3578	0.0837405	0.705618	0.0715534
572	Threonine	Crohn's disease of small intestine	Weighted mode	0.512325	8.72383	0.0300873	0.652065	0.0977168
572	Threonine	Crohn's disease of small intestine	MR RAPS	1.44209	7.13459	0.291483	0.653591	0.0886477
573	Tyrosine	Crohn's disease of small intestine	Inverse variance weighted (multiplicative random effects)	0.0101761	0.222438	0.000465538	0.00355581	0.0817802
573	Tyrosine	Crohn's disease of small intestine	MR Egger	180043	1.88e+40	1.72e-30	0.634997	1
573	Tyrosine	Crohn's disease of small intestine	Inverse variance weighted (fixed effects)	0.0101761	0.37302	0.000277609	0.0125371	0.0817802
573	Tyrosine	Crohn's disease of small intestine	Weighted median	0.0171556	1.42835	0.000206053	0.0715492	0.0813219
573	Tyrosine	Crohn's disease of small intestine	Weighted mode	0.0440893	11.2393	0.000172952	0.384589	0.0795864
573	Tyrosine	Crohn's disease of small intestine	MR RAPS	0.00967971	0.429416	0.000218196	0.0165351	0.081813
574	Lysine	Crohn's disease of small intestine	MR RAPS	0.453005	60.1763	0.0034102	0.750906	0.0556432
575	Methionine	Crohn's disease of small intestine	MR RAPS	47.3584	314684	0.00712721	0.390301	1
576	Malate	Crohn's disease of small intestine	MR RAPS	0.720223	42.851	0.0121052	0.874903	0.0522475
578	Nonadecanoate (19:0)	Crohn's disease of small intestine	MR RAPS	0.038449	12.4755	0.000118498	0.26937	0.0715263
579	Stearate (18:0)	Crohn's disease of small intestine	Inverse variance weighted (multiplicative random effects)	0.27105	8.83905	0.00831179	0.46278	0.076411
579	Stearate (18:0)	Crohn's disease of small intestine	Inverse variance weighted (fixed effects)	0.27105	8.99037	0.00817189	0.464952	0.076411
579	Stearate (18:0)	Crohn's disease of small intestine	MR RAPS	0.267193	9.74094	0.00732908	0.471941	0.076697
580	Oleate (18:1n9)	Crohn's disease of small intestine	MR RAPS	2.3462	311.857	0.0176512	0.732476	0.0901595
581	Pentadecanoate (15:0)	Crohn's disease of small intestine	MR RAPS	0.0892095	25.8954	0.000307326	0.403547	0.0634609
582	Myristate (14:0)	Crohn's disease of small intestine	Inverse variance weighted (multiplicative random effects)	0.95521	2.59383	0.351767	0.92836	0.0508641
582	Myristate (14:0)	Crohn's disease of small intestine	MR Egger	2.65922	17.6147	0.401453	0.294077	0.894442
582	Myristate (14:0)	Crohn's disease of small intestine	Inverse variance weighted (fixed effects)	0.95521	2.45457	0.371726	0.924183	0.0508641
582	Myristate (14:0)	Crohn's disease of small intestine	Weighted median	1.33494	5.64552	0.31566	0.694566	0.0993432
582	Myristate (14:0)	Crohn's disease of small intestine	Weighted mode	2.27931	15.5176	0.334795	0.409818	0.696044
582	Myristate (14:0)	Crohn's disease of small intestine	MR RAPS	0.952453	2.54927	0.355853	0.922741	0.0509738
583	Pipecolate	Crohn's disease of small intestine	MR RAPS	8.68483	133.578	0.564663	0.121108	0.999996
584	Ornithine	Crohn's disease of small intestine	Inverse variance weighted (multiplicative random effects)	0.742479	3.72846	0.147856	0.717615	0.0561137
584	Ornithine	Crohn's disease of small intestine	MR Egger	0.181243	209.035	0.000157147	0.549387	0.114115
584	Ornithine	Crohn's disease of small intestine	Inverse variance weighted (fixed effects)	0.742479	6.00067	0.091869	0.780023	0.0561137
584	Ornithine	Crohn's disease of small intestine	Weighted median	0.457555	6.15856	0.0339944	0.555547	0.0775623
584	Ornithine	Crohn's disease of small intestine	Weighted mode	0.354335	6.42596	0.0195384	0.521527	0.0893391
584	Ornithine	Crohn's disease of small intestine	MR RAPS	0.739524	6.82059	0.080183	0.790081	0.0562555
585	5-oxoproline	Crohn's disease of small intestine	MR RAPS	0.351027	2.30641	0.0534249	0.275738	0.107387
587	4-acetamidobutanoate	Crohn's disease of small intestine	Inverse variance weighted (multiplicative random effects)	0.240642	6.95965	0.00832064	0.406654	0.102617
587	4-acetamidobutanoate	Crohn's disease of small intestine	Inverse variance weighted (fixed effects)	0.240642	2.12964	0.0271919	0.200383	0.102617
587	4-acetamidobutanoate	Crohn's disease of small intestine	MR RAPS	0.237674	2.14583	0.026325	0.200585	0.103041
588	Alpha-tocopherol	Crohn's disease of small intestine	Inverse variance weighted (multiplicative random effects)	1.87161	5.94316	0.589402	0.28767	0.284186
588	Alpha-tocopherol	Crohn's disease of small intestine	MR Egger	1.00264	38.87	0.0258626	0.998722	0.050002
588	Alpha-tocopherol	Crohn's disease of small intestine	Inverse variance weighted (fixed effects)	1.87161	5.86213	0.597549	0.281913	0.284186
588	Alpha-tocopherol	Crohn's disease of small intestine	Weighted median	4.05525	19.573	0.840193	0.0812998	0.998475
588	Alpha-tocopherol	Crohn's disease of small intestine	Weighted mode	5.5052	70.4358	0.430281	0.226058	1
588	Alpha-tocopherol	Crohn's disease of small intestine	MR RAPS	1.95542	6.46181	0.591732	0.271497	0.330862
589	Citrate	Crohn's disease of small intestine	Inverse variance weighted (multiplicative random effects)	1.88561	59.782	0.0594751	0.719104	0.116535
589	Citrate	Crohn's disease of small intestine	MR Egger	272344	22263040760	3.33158	0.0466748	1
589	Citrate	Crohn's disease of small intestine	Inverse variance weighted (fixed effects)	1.88561	21.2834	0.167057	0.608011	0.116535
589	Citrate	Crohn's disease of small intestine	Weighted median	1.17221	37.7162	0.0364318	0.928514	0.0524499
589	Citrate	Crohn's disease of small intestine	Weighted mode	0.314419	134.153	0.000736918	0.723413	0.0900748
589	Citrate	Crohn's disease of small intestine	MR RAPS	1.94456	23.0188	0.164272	0.597881	0.12593
590	Glycerate	Crohn's disease of small intestine	Inverse variance weighted (multiplicative random effects)	1.37212	8.55621	0.22004	0.73478	0.0719269
590	Glycerate	Crohn's disease of small intestine	MR Egger	0.614056	374.273	0.00100746	0.869194	0.0738098
590	Glycerate	Crohn's disease of small intestine	Inverse variance weighted (fixed effects)	1.37212	6.66615	0.282428	0.694858	0.0719269
590	Glycerate	Crohn's disease of small intestine	Weighted median	3.70556	36.0069	0.381347	0.258886	0.889326
590	Glycerate	Crohn's disease of small intestine	Weighted mode	4.3453	104.183	0.181236	0.386084	0.977461
590	Glycerate	Crohn's disease of small intestine	MR RAPS	1.40561	7.24227	0.272808	0.683977	0.0761013
591	Guanosine	Crohn's disease of small intestine	Inverse variance weighted (multiplicative random effects)	1.31303	2.36714	0.728322	0.365091	0.221336
591	Guanosine	Crohn's disease of small intestine	MR Egger	1.36614	8.78771	0.212381	0.719882	0.285122
591	Guanosine	Crohn's disease of small intestine	Inverse variance weighted (fixed effects)	1.31303	2.09932	0.821238	0.255354	0.221336
591	Guanosine	Crohn's disease of small intestine	Weighted median	1.11541	2.14266	0.580654	0.742967	0.07235
591	Guanosine	Crohn's disease of small intestine	Weighted mode	0.971845	2.44322	0.386573	0.952672	0.0513166
591	Guanosine	Crohn's disease of small intestine	MR RAPS	1.33642	2.18596	0.817044	0.248037	0.24833
592	N-acetylalanine	Crohn's disease of small intestine	MR RAPS	0.108833	5161.55	2.29e-06	0.686396	0.0541146
594	Ursodeoxycholate	Crohn's disease of small intestine	Inverse variance weighted (multiplicative random effects)	1.39442	2.15753	0.901216	0.13545	0.294836
594	Ursodeoxycholate	Crohn's disease of small intestine	MR Egger	0.933462	2.01604	0.43221	0.842496	0.056624
594	Ursodeoxycholate	Crohn's disease of small intestine	Inverse variance weighted (fixed effects)	1.39442	2.10973	0.921634	0.115551	0.294836
594	Ursodeoxycholate	Crohn's disease of small intestine	Weighted median	1.21846	2.12952	0.697171	0.487907	0.123376
594	Ursodeoxycholate	Crohn's disease of small intestine	Weighted mode	1.20024	2.09167	0.688723	0.537548	0.111397
594	Ursodeoxycholate	Crohn's disease of small intestine	MR RAPS	1.41606	2.2335	0.897795	0.134581	0.322107
595	Arginine	Crohn's disease of small intestine	Inverse variance weighted (multiplicative random effects)	2.39777	9.36439	0.613952	0.208332	0.630233
595	Arginine	Crohn's disease of small intestine	MR Egger	2.64523	287.994	0.0242966	0.667538	0.7704
595	Arginine	Crohn's disease of small intestine	Inverse variance weighted (fixed effects)	2.39777	8.27747	0.69457	0.166527	0.630233
595	Arginine	Crohn's disease of small intestine	Weighted median	2.43131	14.9791	0.394634	0.338212	0.650863
595	Arginine	Crohn's disease of small intestine	Weighted mode	1.84364	18.5242	0.183489	0.610008	0.282446
595	Arginine	Crohn's disease of small intestine	MR RAPS	2.49995	9.24172	0.676252	0.169575	0.691686
596	Ascorbate (Vitamin C)	Crohn's disease of small intestine	Inverse variance weighted (multiplicative random effects)	0.803355	1.12618	0.573069	0.203909	0.277065
596	Ascorbate (Vitamin C)	Crohn's disease of small intestine	MR Egger	0.599449	1.48495	0.241987	0.242697	0.796376
596	Ascorbate (Vitamin C)	Crohn's disease of small intestine	Inverse variance weighted (fixed effects)	0.803355	1.09548	0.589128	0.16645	0.277065
596	Ascorbate (Vitamin C)	Crohn's disease of small intestine	Weighted median	0.833527	1.2889	0.539038	0.412907	0.211935
596	Ascorbate (Vitamin C)	Crohn's disease of small intestine	Weighted mode	0.834874	1.34136	0.519634	0.471299	0.209266
596	Ascorbate (Vitamin C)	Crohn's disease of small intestine	MR RAPS	0.795658	1.10796	0.571384	0.176016	0.295198
597	Heptanoate (7:0)	Crohn's disease of small intestine	Inverse variance weighted (multiplicative random effects)	4.51527	38.9956	0.52282	0.170551	0.362653
597	Heptanoate (7:0)	Crohn's disease of small intestine	Inverse variance weighted (fixed effects)	4.51527	371.57	0.0548692	0.502894	0.362653
597	Heptanoate (7:0)	Crohn's disease of small intestine	MR RAPS	4.54092	467.841	0.0440747	0.522266	0.367276
598	Laurate (12:0)	Crohn's disease of small intestine	Inverse variance weighted (multiplicative random effects)	1.52623	4.32782	0.53823	0.426567	0.0556718
598	Laurate (12:0)	Crohn's disease of small intestine	Inverse variance weighted (fixed effects)	1.52623	133.638	0.0174304	0.853001	0.0556718
598	Laurate (12:0)	Crohn's disease of small intestine	MR RAPS	1.5268	168.798	0.0138101	0.860085	0.0556842
600	Urea	Crohn's disease of small intestine	Inverse variance weighted (multiplicative random effects)	1.78888	12.3413	0.259299	0.555049	0.145915
600	Urea	Crohn's disease of small intestine	MR Egger	3.57897	4507.42	0.00284177	0.692731	0.838934
600	Urea	Crohn's disease of small intestine	Inverse variance weighted (fixed effects)	1.78888	10.431	0.306784	0.517955	0.145915
600	Urea	Crohn's disease of small intestine	Weighted median	1.76884	22.3813	0.139795	0.659608	0.140981
600	Urea	Crohn's disease of small intestine	Weighted mode	3.67342	66.4877	0.202956	0.404198	0.864488
600	Urea	Crohn's disease of small intestine	MR RAPS	1.83589	11.7708	0.286342	0.521623	0.158021
601	Cortisol	Crohn's disease of small intestine	Inverse variance weighted (multiplicative random effects)	4.45065	16.1468	1.22676	0.0231565	0.999999
601	Cortisol	Crohn's disease of small intestine	MR Egger	0.33333	5.5514	0.0200146	0.402688	0.25321
[truncated: 7,189 more rows]

## Sheet: 3
Supplementary Table 3. SNP information included in MR studies
Note: SNP, rsID of SNP; Chr, the chromosome where the SNP is located; Pos, SNP's position on the chromosome; EA, Effect Allele; OA, Other Allele; Eaf, Effect Allele Frequency; Beta, Effect Size; SE, Standard Error; pval, P Value; .exposure, values from exposure datasets; .outcome, values from outcome datasets.
Batch	Exposure	Outcome	SNP	Chr	Pos	EA	OA	F Statistic	Eaf.Exposure	Beta.Exposure	Se.Exposure	Pval.Exposure	Eaf.Outcome	Beta.Outcome	Se.Outcome	Pval.Outcome
1	Glutamine	Crohn's disease of colon	rs2657879	12	56865338	G	A	77.8547	0.1821	-0.015	0.0017	6.15e-18	0.181742	-0.0102203	0.0463252	0.825388
2	Tryptophan	Crohn's disease of colon	rs1016522	5	143193326	A	G	41.5309	0.5803	0.0058	0.0009	1.59e-10	0.585681	-0.0398925	0.0362724	0.271417
2	Tryptophan	Crohn's disease of colon	rs13122250	4	156808288	T	C	47.4568	0.5542	0.0062	0.0009	8.95e-12	0.622069	-0.0164374	0.0370907	0.657646
2	Tryptophan	Crohn's disease of colon	rs1373962	5	83527862	C	T	30.8642	0.4027	-0.005	0.0009	2.71e-08	0.395206	-0.0177628	0.0365258	0.62675
2	Tryptophan	Crohn's disease of colon	rs2111118	16	54049153	C	T	32.1111	0.3793	-0.0051	0.0009	1.21e-08	0.471467	0.0488149	0.0359085	0.174013
2	Tryptophan	Crohn's disease of colon	rs284191	1	92236048	G	A	36	0.385	0.006	0.001	1.97e-09	0.367228	0.0275386	0.0370887	0.457781
2	Tryptophan	Crohn's disease of colon	rs38271	7	14307031	G	A	32.1111	0.4075	0.0051	0.0009	1.19e-08	0.379009	0.04435	0.0367008	0.226885
2	Tryptophan	Crohn's disease of colon	rs4306882	3	21062584	T	G	40.1111	0.6153	-0.0057	0.0009	2.52e-10	0.562096	0.0377241	0.0359922	0.294584
2	Tryptophan	Crohn's disease of colon	rs4615256	5	62700867	G	A	29.642	0.4673	-0.0049	0.0009	4.99e-08	0.556648	-0.00174838	0.0360425	0.961311
2	Tryptophan	Crohn's disease of colon	rs4958379	5	154010041	A	G	30.8642	0.433	-0.005	0.0009	2.18e-08	0.37407	-0.0101151	0.0368379	0.783635
2	Tryptophan	Crohn's disease of colon	rs6480970	10	54568664	A	G	29.642	0.6159	-0.0049	0.0009	4.29e-08	0.656894	0.0180204	0.0377422	0.633034
2	Tryptophan	Crohn's disease of colon	rs6935961	6	125636350	G	A	38.716	0.4422	0.0056	0.0009	3.75e-10	0.341638	0.0273351	0.0376486	0.467803
2	Tryptophan	Crohn's disease of colon	rs710580	3	189809163	A	C	30.8642	0.3566	-0.005	0.0009	3.57e-08	0.355579	-0.0216883	0.0373401	0.561354
2	Tryptophan	Crohn's disease of colon	rs7463805	8	110753672	T	C	34.679	0.5213	-0.0053	0.0009	4.6e-09	0.468899	-0.00770454	0.0357227	0.82924
2	Tryptophan	Crohn's disease of colon	rs7584842	2	11756260	C	T	30.8642	0.4623	0.005	0.0009	4.15e-08	0.401887	-0.0238774	0.0364718	0.512672
2	Tryptophan	Crohn's disease of colon	rs9511152	13	19596767	A	G	30.8642	0.559	-0.005	0.0009	2.98e-08	0.53197	0.0330782	0.0358832	0.356619
2	Tryptophan	Crohn's disease of colon	rs972459	3	191855497	C	T	30.8642	0.4213	-0.005	0.0009	1.97e-08	0.424095	0.00916743	0.036147	0.799793
4	Leucine	Crohn's disease of colon	rs10923016	1	88516267	G	A	34.679	0.3809	-0.0053	0.0009	2.88e-09	0.518793	0.0403604	0.0357591	0.259035
4	Leucine	Crohn's disease of colon	rs1440581	4	89226422	C	T	81	0.5408	0.0081	0.0009	1.44e-19	0.490348	0.0390804	0.0362269	0.280691
4	Leucine	Crohn's disease of colon	rs1871053	11	88476191	G	A	30.8642	0.5487	0.005	0.0009	2.4e-08	0.596039	-0.0209971	0.0363702	0.563727
4	Leucine	Crohn's disease of colon	rs2713737	3	100767398	A	G	36	0.44	-0.006	0.001	1.97e-09	0.543073	-0.0162791	0.0358069	0.649371
4	Leucine	Crohn's disease of colon	rs6735596	2	228093883	C	A	33.3827	0.3733	0.0052	0.0009	1.15e-08	0.334606	-0.0170183	0.0377061	0.651742
4	Leucine	Crohn's disease of colon	rs6737109	2	23179531	C	T	32.1111	0.4239	-0.0051	0.0009	1.45e-08	0.472549	-0.048342	0.0358493	0.177505
4	Leucine	Crohn's disease of colon	rs6820011	4	167390955	T	G	32.1111	0.5152	-0.0051	0.0009	1.18e-08	0.632944	-0.00035729	0.0371307	0.992322
4	Leucine	Crohn's disease of colon	rs6820313	4	140134659	T	G	29.642	0.5169	0.0049	0.0009	4.65e-08	0.58018	-0.00856712	0.0361201	0.812514
4	Leucine	Crohn's disease of colon	rs7584842	2	11756260	C	T	32.1111	0.4621	0.0051	0.0009	1.89e-08	0.401887	-0.0238774	0.0364718	0.512672
4	Leucine	Crohn's disease of colon	rs7647029	3	131726722	A	G	34.679	0.6479	0.0053	0.0009	1.02e-08	0.61178	0.019639	0.0366676	0.592239
4	Leucine	Crohn's disease of colon	rs9541214	13	35112824	C	T	30.8642	0.3471	0.005	0.0009	3.4e-08	0.357953	-0.028567	0.0372533	0.443181
6	Phenylalanine	Crohn's disease of colon	rs1718306	12	103257308	C	T	46.4876	0.5977	-0.0075	0.0011	7.34e-11	0.593978	-0.00814591	0.0364009	0.822926
7	Creatinine	Crohn's disease of colon	rs2042499	7	24095366	A	C	33.3827	0.4837	0.0052	0.0009	4.88e-08	0.484254	0.0282373	0.035724	0.429278
8	Lactate	Crohn's disease of colon	rs10788232	10	123803584	T	C	21.3906	0.6825	-0.0111	0.0024	2.46e-06	0.611036	-0.00036645	0.036746	0.992043
8	Lactate	Crohn's disease of colon	rs1193345	1	17913714	A	G	23.04	0.9357	-0.0216	0.0045	1.43e-06	0.902656	0.0105252	0.06029	0.861413
8	Lactate	Crohn's disease of colon	rs1330523	13	104925616	A	G	23.7656	0.2326	-0.0117	0.0024	1.56e-06	0.212241	0.0288136	0.0436622	0.509304
8	Lactate	Crohn's disease of colon	rs16937124	10	36885746	C	A	20.8412	0.0529	0.021	0.0046	5.62e-06	0.0547939	-0.0534056	0.0798226	0.503461
8	Lactate	Crohn's disease of colon	rs2000812	18	47093790	T	C	19.7136	0.8223	0.0111	0.0025	9.7e-06	0.739908	0.00988979	0.0408066	0.808503
8	Lactate	Crohn's disease of colon	rs3785024	16	84136233	G	A	20.7118	0.0531	0.0223	0.0049	5.56e-06	0.0583452	-0.092093	0.0766398	0.229505
8	Lactate	Crohn's disease of colon	rs4635489	2	30126856	A	G	20.7025	0.0177	0.0364	0.008	5.66e-06	0.0320797	0.076418	0.102166	0.454472
8	Lactate	Crohn's disease of colon	rs4718532	7	66805000	C	T	20.898	0.4948	0.016	0.0035	6.6e-06	0.54523	-0.0373711	0.0360053	0.299301
8	Lactate	Crohn's disease of colon	rs723526	7	55134819	G	A	21.0069	0.8006	0.011	0.0024	6.62e-06	0.842138	-0.0909624	0.0490597	0.0637221
9	3-hydroxybutyrate (BHBA)	Crohn's disease of colon	rs11224003	11	134637840	A	G	20.2984	0.177	0.0419	0.0093	7.07e-06	0.166641	-0.036589	0.0482151	0.44793
9	3-hydroxybutyrate (BHBA)	Crohn's disease of colon	rs13288937	9	18117253	A	C	22.3733	0.0205	0.2488	0.0526	2.29e-06	0.00717283	-0.00113503	0.210963	0.995707
9	3-hydroxybutyrate (BHBA)	Crohn's disease of colon	rs2295758	11	35236125	C	T	19.8811	0.0246	0.1137	0.0255	8.57e-06	0.0261059	0.165265	0.112874	0.143149
9	3-hydroxybutyrate (BHBA)	Crohn's disease of colon	rs2711506	7	68256685	A	G	20.5008	0.5343	-0.0326	0.0072	6.35e-06	0.571966	-0.0272	0.0360646	0.450727
9	3-hydroxybutyrate (BHBA)	Crohn's disease of colon	rs4297577	13	80231387	T	C	21.8523	0.0384	0.0977	0.0209	2.94e-06	0.0273572	0.0790302	0.109586	0.470805
9	3-hydroxybutyrate (BHBA)	Crohn's disease of colon	rs4838537	10	50827721	T	C	21.2997	0.0133	0.3226	0.0699	3.96e-06	0.0339051	0.0448239	0.098299	0.648394
9	3-hydroxybutyrate (BHBA)	Crohn's disease of colon	rs6493912	15	57600488	T	C	20.6408	0.7431	-0.0368	0.0081	5.36e-06	0.780474	0.0292713	0.043331	0.499341
9	3-hydroxybutyrate (BHBA)	Crohn's disease of colon	rs7314742	12	122212752	T	G	20.0256	0.2662	-0.0358	0.008	8.51e-06	0.222354	-0.0148255	0.0431446	0.731129
9	3-hydroxybutyrate (BHBA)	Crohn's disease of colon	rs8000457	13	22871975	C	T	23.3648	0.0339	0.2093	0.0433	1.35e-06	0.056166	-0.124386	0.0774756	0.108387
10	Arabinose	Crohn's disease of colon	rs12091176	1	216322436	A	G	21.9618	0.0264	0.127	0.0271	2.81e-06	0.154177	-0.0299977	0.0495544	0.544947
10	Arabinose	Crohn's disease of colon	rs12426131	12	46567909	A	G	23.2664	0.1446	0.0246	0.0051	1.68e-06	0.152738	0.0521571	0.0501256	0.298094
10	Arabinose	Crohn's disease of colon	rs526744	19	49300605	C	T	25	0.757	0.021	0.0042	7.14e-07	0.789873	0.0240664	0.0439944	0.584355
10	Arabinose	Crohn's disease of colon	rs7790791	7	139994273	C	T	20.8779	0.9127	-0.0594	0.013	4.67e-06	0.887967	-0.0485695	0.0568586	0.392986
11	Fructose	Crohn's disease of colon	rs2456584	19	51313145	A	G	23.4047	0.5393	-0.0179	0.0037	1.64e-06	0.566739	0.0627833	0.0360884	0.0819106
11	Fructose	Crohn's disease of colon	rs4663119	2	235172988	A	G	20.0075	0.0773	0.0331	0.0074	7.32e-06	0.0745511	0.114502	0.0682796	0.0935513
11	Fructose	Crohn's disease of colon	rs661454	6	50620678	A	G	23.7844	0.0848	0.0317	0.0065	1.31e-06	0.0608739	-0.0733806	0.0745655	0.325062
13	Pyruvate	Crohn's disease of colon	rs10237319	7	4073601	T	C	19.6371	0.1467	0.0226	0.0051	9.78e-06	0.180007	0.0312496	0.0465999	0.502479
13	Pyruvate	Crohn's disease of colon	rs11259923	15	84535704	G	A	21.3018	0.1861	-0.042	0.0091	3.92e-06	0.179702	0.0948057	0.0464396	0.0412031
13	Pyruvate	Crohn's disease of colon	rs1133034	3	182640615	T	C	21.5081	0.0757	0.032	0.0069	3.91e-06	0.0770675	-0.01308	0.0672177	0.845713
13	Pyruvate	Crohn's disease of colon	rs12515830	5	101178314	G	T	20.417	0.1256	-0.0244	0.0054	5.79e-06	0.126089	-0.00186161	0.0539942	0.972496
13	Pyruvate	Crohn's disease of colon	rs13195863	6	100393761	A	C	25	0.2043	0.022	0.0044	4.13e-07	0.195787	0.0215535	0.0450083	0.632025
13	Pyruvate	Crohn's disease of colon	rs2833657	21	33478113	G	A	21.9612	0.1746	-0.0239	0.0051	3.02e-06	0.153135	0.0463265	0.0494737	0.349074
13	Pyruvate	Crohn's disease of colon	rs2964063	5	173859251	T	C	22.486	0.9853	-0.0735	0.0155	2.25e-06	0.987104	0.285761	0.15959	0.0733584
13	Pyruvate	Crohn's disease of colon	rs3925033	12	18456713	G	T	21.9559	0.5409	0.0164	0.0035	2.59e-06	0.632402	-0.00343911	0.0370832	0.92611
13	Pyruvate	Crohn's disease of colon	rs4648464	1	3171929	A	G	20.0008	0.5522	-0.0161	0.0036	9.37e-06	0.589666	0.0755996	0.0365299	0.0384964
13	Pyruvate	Crohn's disease of colon	rs6895278	5	147122020	C	T	20.6165	0.6646	-0.0168	0.0037	4.13e-06	0.61931	0.0305456	0.036916	0.407991
13	Pyruvate	Crohn's disease of colon	rs7941871	11	13228006	T	G	23.04	0.8353	-0.024	0.005	1.56e-06	0.716207	-0.00140013	0.0396669	0.971843
13	Pyruvate	Crohn's disease of colon	rs924483	13	27061003	A	G	21.7276	0.0916	-0.0289	0.0062	3.25e-06	0.102549	0.0029796	0.0594163	0.960005
14	Uridine	Crohn's disease of colon	rs131794	22	50971752	C	A	65.7901	0.7926	-0.0146	0.0018	4.37e-16	0.818014	-0.0432086	0.0462383	0.350058
14	Uridine	Crohn's disease of colon	rs2686796	7	48102911	T	C	30.5744	0.4524	0.0094	0.0017	1.89e-08	0.457245	-0.0472276	0.0358147	0.18728
14	Uridine	Crohn's disease of colon	rs532545	1	20915172	T	C	31.2284	0.3065	-0.0095	0.0017	3.41e-08	0.203281	0.0469297	0.0442535	0.288928
15	Linoleate (18:2n6)	Crohn's disease of colon	rs12238083	9	93741195	T	C	21.2158	0.1389	0.0152	0.0033	3.01e-06	0.0953078	-0.00165042	0.0606563	0.978293
15	Linoleate (18:2n6)	Crohn's disease of colon	rs12336893	9	2632365	G	T	21.7276	0.0412	-0.0289	0.0062	2.68e-06	0.03313	-0.124183	0.100395	0.216107
15	Linoleate (18:2n6)	Crohn's disease of colon	rs13225022	7	51849478	G	A	22.3802	0.3216	0.0123	0.0026	1.4e-06	0.454973	-0.000960296	0.0359363	0.978681
15	Linoleate (18:2n6)	Crohn's disease of colon	rs13280152	8	76414970	T	G	24.0992	0.1202	0.0162	0.0033	1.22e-06	0.137287	-0.0288367	0.0519688	0.578974
15	Linoleate (18:2n6)	Crohn's disease of colon	rs1477025	16	49811433	C	T	20.6267	0.3455	-0.0109	0.0024	7.63e-06	0.393029	0.0416034	0.0366538	0.25636
15	Linoleate (18:2n6)	Crohn's disease of colon	rs1502520	17	51547100	G	T	22.6576	0.2666	-0.0119	0.0025	1.63e-06	0.253078	-0.0476981	0.0411167	0.246022
15	Linoleate (18:2n6)	Crohn's disease of colon	rs16911296	11	12436827	A	G	21.5709	0.0771	-0.0209	0.0045	4.18e-06	0.0999371	-0.104416	0.0593849	0.0786973
15	Linoleate (18:2n6)	Crohn's disease of colon	rs17087487	4	57936947	A	G	19.7341	0.053	-0.0231	0.0052	8e-06	0.103046	-0.0668691	0.0591174	0.258003
15	Linoleate (18:2n6)	Crohn's disease of colon	rs1956129	14	40155324	T	C	25.8064	0.7589	-0.0127	0.0025	3.66e-07	0.753166	-0.00298645	0.0413696	0.942451
15	Linoleate (18:2n6)	Crohn's disease of colon	rs2242415	5	17225333	C	A	20.6267	0.3767	-0.0109	0.0024	8.24e-06	0.355085	0.0208994	0.0376923	0.579254
15	Linoleate (18:2n6)	Crohn's disease of colon	rs4654501	1	4235768	A	G	19.7136	0.7671	0.0111	0.0025	9.23e-06	0.83243	-0.0866296	0.0478122	0.0700052
15	Linoleate (18:2n6)	Crohn's disease of colon	rs6075489	20	19208970	G	A	20.4304	0.2823	-0.0113	0.0025	9.51e-06	0.254165	-0.00946554	0.0412779	0.818626
15	Linoleate (18:2n6)	Crohn's disease of colon	rs7014120	8	95786605	A	G	20.1139	0.1341	0.0148	0.0033	5.67e-06	0.132768	-0.00086583	0.0527295	0.986899
15	Linoleate (18:2n6)	Crohn's disease of colon	rs7115681	11	42459273	T	C	29.7934	0.4668	-0.0131	0.0024	8.29e-08	0.362386	-0.00764373	0.0372945	0.837607
15	Linoleate (18:2n6)	Crohn's disease of colon	rs7898173	10	3429328	A	G	19.9697	0.1419	-0.0143	0.0032	6.81e-06	0.191861	-0.00516346	0.0455639	0.909774
16	Allantoin	Crohn's disease of colon	rs10492266	12	115605697	C	T	19.3137	0.5745	0.0167	0.0038	8.78e-06	0.640039	0.0178825	0.0373155	0.631779
16	Allantoin	Crohn's disease of colon	rs10771223	12	25651899	G	A	26.5449	0.22	-0.0237	0.0046	2.87e-07	0.320833	0.0673234	0.0382843	0.0786611
16	Allantoin	Crohn's disease of colon	rs11147404	13	30539456	G	T	20.0363	0.1128	-0.0282	0.0063	8.69e-06	0.18985	-0.0121596	0.0455675	0.789585
16	Allantoin	Crohn's disease of colon	rs12718598	7	50428445	C	T	23.6669	0.4822	-0.018	0.0037	1.49e-06	0.398848	0.00327836	0.0367247	0.928868
16	Allantoin	Crohn's disease of colon	rs1431793	2	236173098	A	C	22.0491	0.7526	-0.0216	0.0046	2.9e-06	0.72318	0.0503367	0.0400472	0.208778
16	Allantoin	Crohn's disease of colon	rs1447307	8	94286040	T	G	21.0402	0.227	-0.0211	0.0046	5.69e-06	0.257535	0.0690809	0.0409176	0.0913545
16	Allantoin	Crohn's disease of colon	rs1499094	3	1244434	G	T	20.4461	0.2314	-0.0208	0.0046	7.68e-06	0.282835	0.0335493	0.0397608	0.398793
16	Allantoin	Crohn's disease of colon	rs167277	12	78483079	C	A	20.25	0.219	0.0207	0.0046	7.92e-06	0.205206	-0.0501682	0.0443126	0.257574
16	Allantoin	Crohn's disease of colon	rs2293319	15	31235357	T	C	21.7116	0.7852	-0.0219	0.0047	3.59e-06	0.816697	-0.0219887	0.046061	0.633089
16	Allantoin	Crohn's disease of colon	rs2549842	16	81023659	T	C	20.0548	0.786	-0.0206	0.0046	8.68e-06	0.687428	-0.0653004	0.0385001	0.0898649
16	Allantoin	Crohn's disease of colon	rs8108144	19	23373200	T	G	24.3658	0.788	-0.0232	0.0047	6.44e-07	0.800743	0.00349547	0.0448274	0.937847
16	Allantoin	Crohn's disease of colon	rs8184921	21	22372723	C	T	19.8868	0.4913	-0.0165	0.0037	9.8e-06	0.623956	0.0229634	0.0369554	0.534349
16	Allantoin	Crohn's disease of colon	rs972709	6	66255788	A	C	20.3764	0.6548	0.0483	0.0107	6.73e-06	0.658808	-0.0233068	0.037624	0.535609
16	Allantoin	Crohn's disease of colon	rs9834988	3	79630364	T	C	23.7015	0.5297	0.0185	0.0038	7.98e-07	0.478978	-0.00155404	0.0358146	0.96539
18	Deoxycholate	Crohn's disease of colon	rs8192870	8	59412066	G	T	29.6781	0.6502	0.0365	0.0067	3.99e-08	0.608833	-0.0130951	0.036486	0.719664
19	Margarate (17:0)	Crohn's disease of colon	rs603424	10	102075479	A	G	59.0471	0.1865	0.0292	0.0038	1.56e-14	0.116288	-0.0615452	0.056647	0.277272
20	Inosine	Crohn's disease of colon	rs494562	6	86117129	G	A	50.0959	0.1012	0.1182	0.0167	1.34e-12	0.0931443	-0.0937241	0.0615227	0.127657
21	Isoleucine	Crohn's disease of colon	rs10024717	4	89219645	A	G	28.2227	0.3772	0.0085	0.0016	7.5e-08	0.326579	0.0506421	0.0387395	0.191128
21	Isoleucine	Crohn's disease of colon	rs10063205	5	159137011	T	C	22.1453	0.1559	0.008	0.0017	4.06e-06	0.211973	-0.105528	0.0445426	0.0178287
21	Isoleucine	Crohn's disease of colon	rs11128879	3	1862780	T	C	18.7778	0.1208	-0.0078	0.0018	9.56e-06	0.201599	-0.0224519	0.0446422	0.615014
21	Isoleucine	Crohn's disease of colon	rs12707434	7	138773301	G	A	20.9306	0.0361	0.0366	0.008	4.65e-06	0.0313779	0.0082343	0.103881	0.936821
21	Isoleucine	Crohn's disease of colon	rs161503	5	99636953	C	T	19.7531	0.8824	-0.008	0.0018	6.87e-06	0.887481	-0.0206368	0.0565858	0.715336
21	Isoleucine	Crohn's disease of colon	rs1618996	8	13185926	G	A	25.5586	0.8702	-0.0091	0.0018	3.78e-07	0.873958	0.0167505	0.0539065	0.756004
21	Isoleucine	Crohn's disease of colon	rs1895999	12	48952204	G	A	22.2666	0.8301	0.0151	0.0032	3.43e-06	0.829758	-0.0221182	0.0479339	0.64449
21	Isoleucine	Crohn's disease of colon	rs2397972	15	96358652	A	G	21.3018	0.054	0.012	0.0026	4.05e-06	0.092527	-0.00386095	0.0618886	0.950256
21	Isoleucine	Crohn's disease of colon	rs2470439	12	2015160	G	A	21.2623	0.89	-0.0083	0.0018	5.69e-06	0.885407	0.0525522	0.056301	0.350605
21	Isoleucine	Crohn's disease of colon	rs3760605	18	3870771	C	T	19.2623	0.1088	-0.0079	0.0018	9.8e-06	0.170533	-0.000538746	0.0475139	0.990953
21	Isoleucine	Crohn's disease of colon	rs4086666	11	13875937	G	T	21.2623	0.1196	-0.0083	0.0018	2.42e-06	0.0788158	0.0258714	0.0666844	0.69804
21	Isoleucine	Crohn's disease of colon	rs4347830	2	228058016	A	G	25	0.337	0.01	0.002	5.73e-07	0.412978	-0.0437297	0.036395	0.229546
21	Isoleucine	Crohn's disease of colon	rs4562384	9	1965945	C	T	19.4637	0.2834	-0.0075	0.0017	5.5e-06	0.333582	-0.00459701	0.0380025	0.903718
21	Isoleucine	Crohn's disease of colon	rs6084839	20	4685707	C	A	20.7531	0.0554	0.0123	0.0027	3.99e-06	0.0849501	0.071784	0.063972	0.261813
21	Isoleucine	Crohn's disease of colon	rs6101153	20	59559273	G	A	19.7531	0.1103	0.008	0.0018	8.26e-06	0.118492	-0.0163981	0.0583859	0.77882
21	Isoleucine	Crohn's disease of colon	rs7340968	4	78961666	A	C	19.7136	0.027	0.0333	0.0075	9.05e-06	0.0327415	-0.0651907	0.100831	0.517931
21	Isoleucine	Crohn's disease of colon	rs7530270	1	241684393	C	A	22.2994	0.8	0.0085	0.0018	1.51e-06	0.763706	0.0190064	0.0419549	0.650535
22	Threonine	Crohn's disease of colon	rs10234936	7	19601999	A	G	21.0696	0.035	0.028	0.0061	4.88e-06	0.0226593	-0.10128	0.119721	0.397569
22	Threonine	Crohn's disease of colon	rs1043011	12	56865040	T	G	25.5917	0.1722	0.0172	0.0034	5.21e-07	0.181822	-0.0108191	0.0463055	0.81526
22	Threonine	Crohn's disease of colon	rs10433674	4	71761726	T	C	23.9012	0.9584	0.0264	0.0054	1.24e-06	0.971954	-0.140628	0.109815	0.200336
22	Threonine	Crohn's disease of colon	rs10798574	1	177809627	T	G	22.4044	0.2212	-0.0142	0.003	2.03e-06	0.29626	-0.00961054	0.0391143	0.805911
22	Threonine	Crohn's disease of colon	rs10993160	9	97068926	G	A	22.6392	0.0413	-0.0295	0.0062	1.68e-06	0.0389155	0.00778985	0.0916515	0.932266
22	Threonine	Crohn's disease of colon	rs17092955	14	96081498	T	G	26.4922	0.1024	-0.0175	0.0034	3.39e-07	0.120767	0.0598307	0.0549348	0.2761
22	Threonine	Crohn's disease of colon	rs17268257	4	139765668	T	C	20.6376	0.1349	-0.0159	0.0035	7.31e-06	0.167254	-0.0238996	0.0481508	0.619648
22	Threonine	Crohn's disease of colon	rs202490	20	1748126	T	C	21.3906	0.3533	-0.0111	0.0024	4.45e-06	0.38729	-0.0421697	0.0369051	0.253183
22	Threonine	Crohn's disease of colon	rs3857856	7	130384708	A	G	21.2158	0.8885	0.0152	0.0033	4.93e-06	0.887767	-0.0470029	0.0566294	0.406533
22	Threonine	Crohn's disease of colon	rs4822129	22	42823916	A	G	22.0178	0.194	0.0122	0.0026	3.76e-06	0.198227	-0.0459115	0.0450276	0.307903
22	Threonine	Crohn's disease of colon	rs7220150	17	70208672	C	A	19.843	0.1773	-0.0147	0.0033	6.71e-06	0.181168	-0.0235129	0.0464665	0.612844
22	Threonine	Crohn's disease of colon	rs892051	19	22689387	C	T	19.36	0.7424	-0.011	0.0025	7.67e-06	0.794976	-0.00684932	0.0444165	0.877447
22	Threonine	Crohn's disease of colon	rs9403794	6	146928104	A	C	20.1348	0.5963	0.0175	0.0039	8.09e-06	0.582131	-0.0247032	0.0364391	0.497815
23	Tyrosine	Crohn's disease of colon	rs12728678	1	154764715	T	C	31.8893	0.2003	-0.0096	0.0017	2.19e-08	0.21674	-0.0237974	0.0432715	0.582349
23	Tyrosine	Crohn's disease of colon	rs172650	16	71603912	A	C	40.6406	0.6543	0.0102	0.0016	2.82e-10	0.58578	-0.0398753	0.036274	0.271645
23	Tyrosine	Crohn's disease of colon	rs9400467	6	111424015	T	C	57.1914	0.7059	-0.0121	0.0016	6.54e-14	0.625396	-0.00641415	0.0371793	0.863029
24	Lysine	Crohn's disease of colon	rs2863979	16	68331890	A	G	70.7578	0.7241	0.0143	0.0017	1.44e-17	0.705751	-0.0400149	0.0392205	0.307608
25	Methionine	Crohn's disease of colon	rs320485	1	213646566	C	T	30.5744	0.8676	-0.0094	0.0017	4.97e-08	0.800698	-0.0646471	0.0446292	0.147466
26	Malate	Crohn's disease of colon	rs7503429	17	80191425	A	C	37.8698	0.4255	-0.016	0.0026	1.64e-09	0.438357	0.0362692	0.0359877	0.31354
28	Nonadecanoate (19:0)	Crohn's disease of colon	rs603424	10	102075479	A	G	32.3477	0.1833	0.0182	0.0032	2.23e-08	0.116288	-0.0615452	0.056647	0.277272
29	Stearate (18:0)	Crohn's disease of colon	rs1348656	3	144933520	T	C	32.5851	0.798	-0.0137	0.0024	1.17e-08	0.815277	-0.0589291	0.0458877	0.199071
29	Stearate (18:0)	Crohn's disease of colon	rs603424	10	102075479	A	G	87.8906	0.1835	0.0225	0.0024	6.06e-21	0.116288	-0.0615452	0.056647	0.277272
30	Oleate (18:1n9)	Crohn's disease of colon	rs1348656	3	144933520	T	C	32.8711	0.7976	-0.0172	0.003	1.06e-08	0.815277	-0.0589291	0.0458877	0.199071
31	Pentadecanoate (15:0)	Crohn's disease of colon	rs6887589	5	107011559	G	A	29.8284	0.2213	0.0142	0.0026	4.33e-08	0.214721	-0.0306528	0.0433946	0.479957
32	Myristate (14:0)	Crohn's disease of colon	rs10005295	4	91882724	G	A	21.7321	0.9733	0.0634	0.0136	3.4e-06	0.957109	0.0321979	0.087825	0.713908
32	Myristate (14:0)	Crohn's disease of colon	rs10164158	18	66766874	A	G	20.9764	0.0577	0.0229	0.005	4.18e-06	0.0762834	-0.0523697	0.0675778	0.438367
32	Myristate (14:0)	Crohn's disease of colon	rs10831497	11	95947410	A	G	20.25	0.2209	0.0126	0.0028	4.97e-06	0.260065	0.0109639	0.0407874	0.788079
32	Myristate (14:0)	Crohn's disease of colon	rs11118120	1	218705761	C	A	28.1221	0.1466	0.0175	0.0033	1.71e-07	0.200286	-0.0247538	0.0449715	0.582023
32	Myristate (14:0)	Crohn's disease of colon	rs12250605	10	120049194	C	T	22.0178	0.249	-0.0122	0.0026	2.02e-06	0.406533	0.0208571	0.0367238	0.570072
32	Myristate (14:0)	Crohn's disease of colon	rs12426539	12	131736779	T	C	19.8074	0.0306	0.0405	0.0091	9.31e-06	0.0285094	-0.110633	0.11063	0.317294
32	Myristate (14:0)	Crohn's disease of colon	rs13393013	2	196373911	A	G	23.8374	0.0218	0.0415	0.0085	1.08e-06	0.0341272	-0.0338956	0.098013	0.729473
32	Myristate (14:0)	Crohn's disease of colon	rs17155949	5	103243077	C	T	20.8127	0.0254	-0.0698	0.0153	4.75e-06	0.0345518	-0.146658	0.0980748	0.13482
32	Myristate (14:0)	Crohn's disease of colon	rs1936396	10	45548068	G	A	20.5976	0.7747	0.0118	0.0026	5.67e-06	0.772529	0.0227782	0.0427782	0.594399
32	Myristate (14:0)	Crohn's disease of colon	rs314241	17	7045661	T	C	20.7936	0.4625	-0.0114	0.0025	5.25e-06	0.511182	0.0220576	0.0362092	0.542412
32	Myristate (14:0)	Crohn's disease of colon	rs35350	12	115608730	A	G	19.8976	0.9722	0.0397	0.0089	8.1e-06	0.979741	-0.0537104	0.128586	0.676167
32	Myristate (14:0)	Crohn's disease of colon	rs3759526	14	51292535	T	C	23.6241	0.0806	-0.0209	0.0043	8.93e-07	0.0909636	-0.0874173	0.0619427	0.158168
32	Myristate (14:0)	Crohn's disease of colon	rs4420815	3	33794769	A	G	22.5625	0.143	-0.019	0.004	2.03e-06	0.18681	-0.00624255	0.0458803	0.891773
32	Myristate (14:0)	Crohn's disease of colon	rs453612	20	15402178	C	T	20.7936	0.6451	-0.0114	0.0025	5.85e-06	0.589976	0.0119553	0.0364354	0.742819
32	Myristate (14:0)	Crohn's disease of colon	rs4710948	6	10305925	A	G	21.16	0.3383	-0.0115	0.0025	4.85e-06	0.380466	-0.0244049	0.0368829	0.508173
32	Myristate (14:0)	Crohn's disease of colon	rs603424	10	102075479	A	G	25.6289	0.1832	0.0162	0.0032	5.76e-07	0.116288	-0.0615452	0.056647	0.277272
32	Myristate (14:0)	Crohn's disease of colon	rs6467872	7	81404882	A	C	20.7936	0.6087	0.0114	0.0025	5.64e-06	0.57493	0.0524864	0.03625	0.147645
32	Myristate (14:0)	Crohn's disease of colon	rs6665988	1	200509911	C	A	19.5636	0.2873	0.0115	0.0026	9.11e-06	0.367135	0.0415211	0.0371785	0.264078
32	Myristate (14:0)	Crohn's disease of colon	rs670365	5	41603440	A	G	19.641	0.0903	0.039	0.0088	9.48e-06	0.0943196	-0.0172137	0.0610456	0.777958
32	Myristate (14:0)	Crohn's disease of colon	rs7016645	8	80542027	T	C	20.25	0.253	-0.0117	0.0026	8.44e-06	0.211771	0.0774285	0.0438303	0.0773036
32	Myristate (14:0)	Crohn's disease of colon	rs7796330	7	49127859	C	T	19.9053	0.7273	-0.0116	0.0026	7.93e-06	0.710547	0.0956277	0.0394897	0.0154529
33	Pipecolate	Crohn's disease of colon	rs12725284	1	146792265	T	C	31.6406	0.1606	0.0315	0.0056	1.72e-08	0.192472	0.0874872	0.0452958	0.0534257
34	Ornithine	Crohn's disease of colon	rs10900040	10	44953571	C	T	21.5775	0.1649	0.0144	0.0031	3.4e-06	0.22291	-0.057378	0.043093	0.183027
34	Ornithine	Crohn's disease of colon	rs10945970	6	164697719	T	C	19.36	0.3103	-0.011	0.0025	7.38e-06	0.338012	-0.0399402	0.0378058	0.29076
34	Ornithine	Crohn's disease of colon	rs11701867	21	43556732	A	C	25.3717	0.1761	-0.0136	0.0027	2.75e-07	0.189517	0.0368019	0.0456586	0.42023
34	Ornithine	Crohn's disease of colon	rs13424082	2	180227865	A	G	23.1139	0.1735	-0.0125	0.0026	1.8e-06	0.176982	0.00039752	0.0468957	0.993237
34	Ornithine	Crohn's disease of colon	rs6975921	7	15152813	G	A	23.3384	0.0905	-0.0343	0.0071	1.25e-06	0.10268	0.00389713	0.0588225	0.947177
35	5-oxoproline	Crohn's disease of colon	rs12550729	8	145155408	T	C	482.484	0.9233	0.0637	0.0029	5.97e-110	0.925587	-0.0862306	0.0684581	0.20781
36	Pantothenate	Crohn's disease of colon	rs1395	2	27424636	A	G	40.5816	0.7034	0.0172	0.0027	8.14e-11	0.701923	0.0702448	0.039059	0.0721091
37	4-acetamidobutanoate	Crohn's disease of colon	rs721399	8	18259366	T	C	257.781	0.7176	-0.0289	0.0018	3.95e-58	0.681841	-0.0120771	0.0382903	0.752451
37	4-acetamidobutanoate	Crohn's disease of colon	rs7228099	18	22786478	T	C	29.0401	0.4364	-0.0097	0.0018	3.61e-08	0.383942	0.00274386	0.0367238	0.94044
38	Alpha-tocopherol	Crohn's disease of colon	rs10163969	18	9067439	T	G	19.36	0.0412	-0.0352	0.008	9.38e-06	0.119016	0.0287248	0.0552928	0.603409
38	Alpha-tocopherol	Crohn's disease of colon	rs10245705	7	26129672	T	C	27.2533	0.0181	-0.0663	0.0127	1.95e-07	0.0148405	0.0206107	0.149343	0.890233
38	Alpha-tocopherol	Crohn's disease of colon	rs10935814	3	150352873	A	G	19.8723	0.1006	-0.037	0.0083	9.44e-06	0.111372	-0.0121905	0.0568825	0.830305
38	Alpha-tocopherol	Crohn's disease of colon	rs11145330	9	71733603	C	A	22.7024	0.1092	-0.0324	0.0068	1.95e-06	0.151033	0.0475543	0.0499104	0.340695
38	Alpha-tocopherol	Crohn's disease of colon	rs11992435	8	81526083	G	A	20.6267	0.0512	-0.0327	0.0072	6.38e-06	0.0448965	-0.181535	0.0863016	0.0354226
38	Alpha-tocopherol	Crohn's disease of colon	rs1532701	16	55698027	A	G	20.8544	0.5456	0.0137	0.003	5.07e-06	0.549122	0.0421273	0.0359788	0.241641
38	Alpha-tocopherol	Crohn's disease of colon	rs2074731	22	30733914	A	C	22.259	0.1654	-0.0184	0.0039	2.31e-06	0.182493	-0.0208017	0.0463054	0.653267
38	Alpha-tocopherol	Crohn's disease of colon	rs7238006	18	31927898	C	T	24.3032	0.0738	-0.0281	0.0057	6.77e-07	0.138291	-0.0471665	0.0516187	0.360849
38	Alpha-tocopherol	Crohn's disease of colon	rs7930821	11	19142695	T	C	19.9791	0.0202	0.0666	0.0149	7.53e-06	0.0104865	-0.137017	0.175584	0.435183
39	Citrate	Crohn's disease of colon	rs170149	17	6595930	A	G	53.4988	0.074	0.0256	0.0035	1.42e-13	0.0389143	0.136816	0.0924737	0.139003
39	Citrate	Crohn's disease of colon	rs17804635	17	6703985	T	C	30.25	0.0934	-0.0187	0.0034	3.62e-08	0.101111	-0.0302306	0.0591623	0.609367
39	Citrate	Crohn's disease of colon	rs6507399	18	38732045	G	A	31.4846	0.3287	0.0101	0.0018	1.7e-08	0.350986	0.0140495	0.0374057	0.707216
39	Citrate	Crohn's disease of colon	rs807670	22	19154608	C	A	37.3457	0.579	-0.011	0.0018	6.84e-10	0.591203	0.024967	0.0362415	0.490883
39	Citrate	Crohn's disease of colon	rs835154	5	14876569	A	G	40.1111	0.5753	-0.0114	0.0018	1.15e-10	0.581658	-0.014402	0.0363282	0.69178
39	Citrate	Crohn's disease of colon	rs868395	9	85175793	T	G	31.4846	0.6653	0.0101	0.0018	2.03e-08	0.60162	-0.017179	0.0364999	0.637883
40	Glycerate	Crohn's disease of colon	rs11061416	12	131742242	G	A	27.1267	0.3572	0.0125	0.0024	1.76e-07	0.291103	-0.00856173	0.0395358	0.828554
40	Glycerate	Crohn's disease of colon	rs11618222	13	26299649	T	C	20.7025	0.1008	-0.0182	0.004	6e-06	0.255388	-0.00190613	0.0409862	0.962906
40	Glycerate	Crohn's disease of colon	rs11724197	4	168766934	G	A	21.8694	0.1266	-0.0159	0.0034	2.29e-06	0.113536	-0.0605653	0.056287	0.281924
40	Glycerate	Crohn's disease of colon	rs12507784	4	137507686	A	G	23.04	0.2395	-0.012	0.0025	1.78e-06	0.224325	-0.0406614	0.042812	0.342232
40	Glycerate	Crohn's disease of colon	rs12866131	13	71781111	A	C	21.0069	0.2805	0.011	0.0024	5.62e-06	0.238039	-0.0269864	0.0419251	0.519782
40	Glycerate	Crohn's disease of colon	rs17011367	2	75691522	C	T	19.5636	0.2675	-0.0115	0.0026	7.38e-06	0.259904	0.0421692	0.0406992	0.300147
40	Glycerate	Crohn's disease of colon	rs17086746	4	57259999	T	C	21.16	0.02	-0.046	0.01	4.23e-06	0.030071	-0.0412145	0.104353	0.692878
40	Glycerate	Crohn's disease of colon	rs17131975	5	138583691	A	G	20.25	0.0607	-0.0216	0.0048	8.18e-06	0.0301471	0.0257327	0.104434	0.805372
40	Glycerate	Crohn's disease of colon	rs2643891	1	2292352	A	G	20.25	0.165	-0.018	0.004	6.8e-06	0.254712	0.0593846	0.0409519	0.147029
40	Glycerate	Crohn's disease of colon	rs338526	15	86261840	T	C	21.3906	0.7181	-0.0111	0.0024	5.61e-06	0.675633	-0.103301	0.0375606	0.00595511
40	Glycerate	Crohn's disease of colon	rs6743210	2	235972217	T	C	22.3802	0.6199	0.0123	0.0026	2.21e-06	0.678032	-0.0812916	0.0395131	0.0396543
41	Guanosine	Crohn's disease of colon	rs11141909	9	90218852	A	C	19.7097	0.0405	0.0808	0.0182	9.02e-06	0.0801884	-0.00895143	0.0662553	0.892529
41	Guanosine	Crohn's disease of colon	rs12052900	2	202755176	G	A	21.2285	0.0217	0.1115	0.0242	4.27e-06	0.0237888	-0.108628	0.11637	0.350577
41	Guanosine	Crohn's disease of colon	rs1577941	10	8428209	A	G	21.696	0.1187	0.0531	0.0114	3.48e-06	0.162674	0.011147	0.0486277	0.818689
41	Guanosine	Crohn's disease of colon	rs16887484	5	57155308	G	A	24.3083	0.0415	0.0991	0.0201	8.81e-07	0.0917575	0.057934	0.0619438	0.34965
41	Guanosine	Crohn's disease of colon	rs16933423	8	68510396	G	A	19.847	0.0349	-0.0891	0.02	8.31e-06	0.0202299	-0.262271	0.128075	0.0405798
41	Guanosine	Crohn's disease of colon	rs17224277	2	182340444	A	G	22.315	0.0789	0.0633	0.0134	2.29e-06	0.0598793	0.0486026	0.07581	0.521452
41	Guanosine	Crohn's disease of colon	rs2257243	21	29388625	A	G	22.2784	0.6612	0.0354	0.0075	2.18e-06	0.655473	0.0337763	0.0376818	0.370062
41	Guanosine	Crohn's disease of colon	rs2846365	11	102571892	G	A	22.3956	0.5524	-0.0336	0.0071	1.98e-06	0.494713	0.0334701	0.035706	0.348564
41	Guanosine	Crohn's disease of colon	rs4661299	1	15029260	G	T	20.1867	0.5449	-0.0319	0.0071	7.63e-06	0.530172	0.058494	0.0358443	0.102702
41	Guanosine	Crohn's disease of colon	rs4948051	7	55688100	T	C	21.0801	0.1328	0.0528	0.0115	4.84e-06	0.20253	-0.0930099	0.044532	0.0367435
41	Guanosine	Crohn's disease of colon	rs7438272	4	96474568	T	C	22.9309	0.1691	0.0589	0.0123	1.8e-06	0.211603	-0.0316244	0.0443312	0.475619
41	Guanosine	Crohn's disease of colon	rs9353315	6	86149938	G	A	20.5511	0.1269	0.0476	0.0105	5.86e-06	0.11256	-0.0279695	0.0564342	0.620167
42	N-acetylalanine	Crohn's disease of colon	rs11144136	9	71502351	T	G	29.0401	0.1375	0.0097	0.0018	4.86e-08	0.111611	-0.0335534	0.0567252	0.55418
44	Ursodeoxycholate	Crohn's disease of colon	rs10174534	2	2449771	A	G	19.7531	0.5571	-0.028	0.0063	7.57e-06	0.461986	0.0264746	0.0358775	0.460565
44	Ursodeoxycholate	Crohn's disease of colon	rs11736497	4	136821683	T	C	20.6808	0.0214	0.1146	0.0252	5.56e-06	0.0526169	-0.0436173	0.0806815	0.588776
44	Ursodeoxycholate	Crohn's disease of colon	rs12587564	14	54574131	G	A	22.0997	0.8852	-0.0456	0.0097	2.63e-06	0.927939	0.0365346	0.0688195	0.595506
44	Ursodeoxycholate	Crohn's disease of colon	rs17118371	14	47813453	T	C	23.3384	0.2298	0.0343	0.0071	1.44e-06	0.307099	-0.0126887	0.0387896	0.743581
44	Ursodeoxycholate	Crohn's disease of colon	rs2421668	2	73885096	A	G	21.6926	0.644	0.034	0.0073	2.87e-06	0.669101	0.0900693	0.0379019	0.0174836
44	Ursodeoxycholate	Crohn's disease of colon	rs2720445	16	79547520	C	T	20.4354	0.464	-0.033	0.0073	5.56e-06	0.440648	-0.0242775	0.0362733	0.503308
44	Ursodeoxycholate	Crohn's disease of colon	rs3760877	19	542672	T	C	19.6999	0.4762	0.0577	0.013	9.55e-06	0.517582	-0.0140138	0.0359671	0.696813
44	Ursodeoxycholate	Crohn's disease of colon	rs6763802	3	23163808	T	G	24.6564	0.0798	-0.0576	0.0116	6.5e-07	0.0566193	-0.0497199	0.0770679	0.518833
44	Ursodeoxycholate	Crohn's disease of colon	rs9573265	13	74197346	T	C	20.6205	0.0158	0.2216	0.0488	5.55e-06	0.0631651	0.103517	0.0733413	0.158113
45	Arginine	Crohn's disease of colon	rs11114987	12	82102912	T	C	23.3852	0.0439	-0.0324	0.0067	1.41e-06	0.019933	0.00537856	0.129073	0.966761
45	Arginine	Crohn's disease of colon	rs1153903	7	54741212	G	A	21.2401	0.6144	0.0106	0.0023	4.19e-06	0.610431	0.051364	0.0367478	0.162191
45	Arginine	Crohn's disease of colon	rs12714263	2	29318077	G	A	21.6427	0.4267	0.0107	0.0023	3.98e-06	0.320216	-0.0029914	0.0383241	0.937784
45	Arginine	Crohn's disease of colon	rs12985777	19	2268055	C	T	19.415	0.7598	0.0141	0.0032	8.86e-06	0.737822	0.0223598	0.0405507	0.581357
45	Arginine	Crohn's disease of colon	rs17706531	19	13015530	G	A	20.8412	0.3669	-0.0105	0.0023	6.97e-06	0.306077	0.00467143	0.0388092	0.904191
45	Arginine	Crohn's disease of colon	rs2180566	20	30018854	T	C	22.4594	0.6433	-0.0109	0.0023	2.1e-06	0.592162	-0.00644784	0.0365666	0.860033
45	Arginine	Crohn's disease of colon	rs2916148	17	65482109	A	G	19.2836	0.4534	-0.0101	0.0023	9.24e-06	0.36497	-0.023736	0.0372308	0.523775
45	Arginine	Crohn's disease of colon	rs2933871	5	24815139	A	G	19.8025	0.6938	0.0178	0.004	7.65e-06	0.794821	-0.0307222	0.0447275	0.492162
45	Arginine	Crohn's disease of colon	rs3011362	10	122553194	A	G	22.2427	0.0334	-0.0349	0.0074	2.37e-06	0.0511089	-0.0736988	0.0812678	0.364479
45	Arginine	Crohn's disease of colon	rs511304	3	174407207	A	C	23.9849	0.4368	0.0191	0.0039	1.01e-06	0.445318	0.000517557	0.0361294	0.988571
45	Arginine	Crohn's disease of colon	rs6479442	9	95715717	C	A	19.2836	0.5163	-0.0101	0.0023	9.59e-06	0.492708	0.0280443	0.0357463	0.432724
45	Arginine	Crohn's disease of colon	rs6920504	6	115971313	T	C	20.25	0.7729	-0.0135	0.003	7.53e-06	0.840501	-0.0139682	0.0488228	0.774802
45	Arginine	Crohn's disease of colon	rs7036499	9	130844744	T	C	19.6122	0.8519	0.0217	0.0049	8.86e-06	0.877922	0.016926	0.0543635	0.755536
45	Arginine	Crohn's disease of colon	rs720118	2	6037363	C	T	20.8412	0.3848	0.0105	0.0023	4.55e-06	0.385217	0.0186923	0.036943	0.612872
45	Arginine	Crohn's disease of colon	rs7535809	1	192302131	G	A	19.8169	0.1669	-0.0138	0.0031	7.28e-06	0.154651	0.0219792	0.0494841	0.656922
45	Arginine	Crohn's disease of colon	rs7717247	5	27839258	C	A	21.4237	0.1939	-0.0162	0.0035	3.35e-06	0.182039	-0.0490898	0.0464986	0.291092
45	Arginine	Crohn's disease of colon	rs837763	16	88853729	T	C	20.7936	0.5528	0.0114	0.0025	6.03e-06	0.553002	0.0639336	0.0358802	0.0747722
45	Arginine	Crohn's disease of colon	rs901272	15	63754773	A	C	20.8412	0.6207	-0.0105	0.0023	6.49e-06	0.660488	-0.000662997	0.0376503	0.98595
46	Ascorbate (Vitamin C)	Crohn's disease of colon	rs11167905	5	144906846	C	T	24.0339	0.1455	-0.0804	0.0164	9.83e-07	0.125059	0.0673692	0.0541279	0.213269
46	Ascorbate (Vitamin C)	Crohn's disease of colon	rs13069990	3	115620801	T	C	21.16	0.3781	-0.0506	0.011	4.44e-06	0.375093	0.00421848	0.0369638	0.909139
46	Ascorbate (Vitamin C)	Crohn's disease of colon	rs13103690	4	9972778	G	T	20.7726	0.4641	0.0474	0.0104	5.2e-06	0.440624	-0.0832216	0.036049	0.0209677
46	Ascorbate (Vitamin C)	Crohn's disease of colon	rs2070006	4	155513866	C	T	20.898	0.6287	-0.0512	0.0112	4.76e-06	0.539478	-0.0185073	0.0358343	0.605528
46	Ascorbate (Vitamin C)	Crohn's disease of colon	rs577596	22	25931606	A	G	24.7375	0.3267	-0.0567	0.0114	6.68e-07	0.423536	0.0595994	0.0362412	0.100069
46	Ascorbate (Vitamin C)	Crohn's disease of colon	rs6713914	2	59523041	C	T	26.1332	0.4259	-0.0593	0.0116	3.22e-07	0.432104	0.0230929	0.0361622	0.523088
46	Ascorbate (Vitamin C)	Crohn's disease of colon	rs6826474	4	96650120	T	C	23.06	0.0393	-0.1383	0.0288	1.56e-06	0.0196917	-0.0175228	0.128295	0.891361
46	Ascorbate (Vitamin C)	Crohn's disease of colon	rs6834631	4	122315665	G	T	23.9257	0.0404	-0.1306	0.0267	1.03e-06	0.020018	0.134892	0.12742	0.289762
46	Ascorbate (Vitamin C)	Crohn's disease of colon	rs7112460	11	125751859	T	C	23.6292	0.0658	0.1084	0.0223	1.14e-06	0.0484543	0.0218791	0.0835365	0.793391
46	Ascorbate (Vitamin C)	Crohn's disease of colon	rs808686	20	19717135	A	G	21.8264	0.6086	0.0598	0.0128	3.01e-06	0.605424	0.0429377	0.0366866	0.241843
46	Ascorbate (Vitamin C)	Crohn's disease of colon	rs8105491	19	20403988	T	G	22.2427	0.154	-0.0698	0.0148	2.3e-06	0.177112	-0.0622125	0.0468418	0.184131
46	Ascorbate (Vitamin C)	Crohn's disease of colon	rs9606290	22	20218237	A	G	20.4037	0.241	0.159	0.0352	6.32e-06	0.16676	0.00802773	0.0482623	0.867893
47	Heptanoate (7:0)	Crohn's disease of colon	rs10153405	18	41270672	A	G	32.7438	0.5342	-0.0103	0.0018	9.27e-09	0.605874	-0.0472101	0.0367014	0.198328
47	Heptanoate (7:0)	Crohn's disease of colon	rs864428	7	136925471	T	C	31.4846	0.4058	0.0101	0.0018	2.99e-08	0.409531	0.0156766	0.0363188	0.666004
48	Laurate (12:0)	Crohn's disease of colon	rs6441206	3	158241071	A	G	30.25	0.4638	0.0099	0.0018	2.09e-08	0.444905	-0.0225071	0.0359935	0.531768
48	Laurate (12:0)	Crohn's disease of colon	rs9563502	13	57944356	G	A	30.8642	0.2885	0.01	0.0018	2.56e-08	0.410573	-0.0436162	0.0362876	0.22938
49	Valine	Crohn's disease of colon	rs1440581	4	89226422	C	T	45.5625	0.5423	0.0081	0.0012	2.56e-12	0.490348	0.0390804	0.0362269	0.280691
50	Urea	Crohn's disease of colon	rs12654812	5	176794191	A	G	22.2784	0.2913	0.0118	0.0025	3.36e-06	0.36677	0.0032946	0.0370858	0.929211
50	Urea	Crohn's disease of colon	rs1569823	20	57205836	C	T	19.9862	0.1243	0.0152	0.0034	8.25e-06	0.109621	0.0171367	0.0574775	0.765591
50	Urea	Crohn's disease of colon	rs1792544	11	15180533	A	G	20.7829	0.8963	-0.0155	0.0034	5.83e-06	0.777996	-0.00559377	0.0432127	0.897004
50	Urea	Crohn's disease of colon	rs2170700	15	93855208	A	G	22.3222	0.8663	0.0326	0.0069	2.43e-06	0.906583	0.0995462	0.0616569	0.106415
50	Urea	Crohn's disease of colon	rs2424200	20	18435035	T	C	19.9862	0.1163	0.0152	0.0034	6.43e-06	0.128397	0.0327623	0.0535536	0.540692
50	Urea	Crohn's disease of colon	rs6074893	20	15419872	C	A	19.5636	0.2488	0.0115	0.0026	8.52e-06	0.213114	-0.0231752	0.0437903	0.596645
50	Urea	Crohn's disease of colon	rs6753621	2	218810908	A	G	20.25	0.2183	-0.0117	0.0026	7.02e-06	0.239688	-0.0403436	0.0419565	0.336272
50	Urea	Crohn's disease of colon	rs686346	9	135978378	C	T	22.4746	0.2342	-0.0128	0.0027	1.44e-06	0.26577	0.0861636	0.0403565	0.0327559
50	Urea	Crohn's disease of colon	rs9646626	18	58527305	C	T	19.6371	0.052	0.0226	0.0051	7.98e-06	0.0455723	-0.0132901	0.0859532	0.877121
51	Cortisol	Crohn's disease of colon	rs1010874	10	84501091	A	G	26.159	0.0629	-0.0491	0.0096	3.17e-07	0.0395462	-0.109826	0.0913585	0.22931
51	Cortisol	Crohn's disease of colon	rs1173842	1	245535862	A	G	19.6122	0.567	-0.0217	0.0049	8.34e-06	0.553946	-0.0924151	0.0362889	0.0108763
51	Cortisol	Crohn's disease of colon	rs11855136	15	57770091	A	G	26.0859	0.0406	-0.0618	0.0121	2.99e-07	0.0457173	0.0522556	0.0861648	0.544208
51	Cortisol	Crohn's disease of colon	rs11987983	8	6718301	T	C	20.0739	0.099	-0.0457	0.0102	7.16e-06	0.0363829	0.00632144	0.0952997	0.947113
51	Cortisol	Crohn's disease of colon	rs12210538	6	110760008	G	A	19.8572	0.1558	-0.0254	0.0057	9.19e-06	0.161407	-0.0738375	0.0484044	0.127152
51	Cortisol	Crohn's disease of colon	rs12883490	14	91195372	C	T	25.3039	0.3344	-0.0166	0.0033	3.76e-07	0.423554	-0.0547451	0.0362864	0.131377
51	Cortisol	Crohn's disease of colon	rs1381274	14	98655131	T	C	20.8164	0.4672	-0.0146	0.0032	3.63e-06	0.503035	-0.0263306	0.0359425	0.463816
51	Cortisol	Crohn's disease of colon	rs1448767	8	29726906	C	T	19.0413	0.3711	0.0144	0.0033	9.95e-06	0.342824	0.0540907	0.0377823	0.152247
51	Cortisol	Crohn's disease of colon	rs4439706	15	47129544	C	T	20.9376	0.2844	-0.0151	0.0033	3.78e-06	0.219657	0.0468394	0.0432313	0.278604
51	Cortisol	Crohn's disease of colon	rs9446392	6	72157939	C	T	19.4775	0.0467	0.0331	0.0075	9.27e-06	0.0495967	-0.0366175	0.0822207	0.656062
52	Cortisone	Crohn's disease of colon	rs10938815	4	20856353	G	T	33.9135	0.4068	-0.0099	0.0017	8.38e-09	0.436636	-0.0402002	0.0360465	0.264751
53	Proline	Crohn's disease of colon	rs2518802	22	18975345	C	A	261.851	0.097	0.0534	0.0033	4.15e-59	0.100613	0.0486257	0.0593995	0.413002
54	Citrulline	Crohn's disease of colon	rs10164524	2	211664333	G	A	34.6021	0.3225	0.01	0.0017	1.06e-08	0.345379	-0.015536	0.0377564	0.680721
54	Citrulline	Crohn's disease of colon	rs1509820	2	211386484	A	G	31.8893	0.5299	0.0096	0.0017	1.75e-08	0.483477	-0.0112742	0.035821	0.75296
54	Citrulline	Crohn's disease of colon	rs682103	5	53394938	C	T	29.0401	0.2945	0.0097	0.0018	4.26e-08	0.300984	-0.00276087	0.0389318	0.943465
55	Biliverdin	Crohn's disease of colon	rs887829	2	234668570	T	C	760.952	0.3411	0.1131	0.0041	2.5e-168	0.391917	-0.0158614	0.0366121	0.664849
56	Serotonin (5HT)	Crohn's disease of colon	rs10516056	5	168468537	T	C	24.3378	0.1978	-0.0222	0.0045	6.99e-07	0.202213	0.0126045	0.0449729	0.779272
56	Serotonin (5HT)	Crohn's disease of colon	rs10881427	1	107172665	T	G	21.9727	0.5558	-0.015	0.0032	3.69e-06	0.551141	0.0115947	0.0359947	0.74736
56	Serotonin (5HT)	Crohn's disease of colon	rs10953038	7	90857574	C	T	21.0069	0.1503	-0.022	0.0048	4.12e-06	0.205252	0.0424653	0.0441425	0.336047
56	Serotonin (5HT)	Crohn's disease of colon	rs11781043	8	98861844	C	T	19.8237	0.3269	0.0187	0.0042	8.81e-06	0.388202	-0.0451309	0.0367871	0.219893
56	Serotonin (5HT)	Crohn's disease of colon	rs12646122	4	156246202	T	C	22.8374	0.0308	-0.0497	0.0104	1.8e-06	0.0943466	0.0223719	0.0612301	0.714832
56	Serotonin (5HT)	Crohn's disease of colon	rs17708932	9	14383287	A	G	20.0662	0.0376	-0.0766	0.0171	7.22e-06	0.0561811	0.0790072	0.078139	0.311964
56	Serotonin (5HT)	Crohn's disease of colon	rs3753556	1	175162723	C	T	21.9727	0.5675	-0.015	0.0032	3.66e-06	0.574199	-0.0570237	0.0362508	0.115712
56	Serotonin (5HT)	Crohn's disease of colon	rs5764174	22	44033934	T	C	23.5225	0.2445	-0.0194	0.004	9.61e-07	0.323084	0.0523688	0.0381786	0.170163
56	Serotonin (5HT)	Crohn's disease of colon	rs6466265	7	78160248	G	A	21.6225	0.2023	-0.0186	0.004	4.15e-06	0.241381	0.0011212	0.0417263	0.978563
56	Serotonin (5HT)	Crohn's disease of colon	rs7868774	9	138016943	A	G	23.2373	0.2709	-0.0188	0.0039	1.78e-06	0.20911	-0.00792111	0.0441225	0.857525
56	Serotonin (5HT)	Crohn's disease of colon	rs8113773	19	30350139	A	G	23.5078	0.5616	0.016	0.0033	1.12e-06	0.458862	0.0564884	0.0359849	0.116467
56	Serotonin (5HT)	Crohn's disease of colon	rs825278	2	222561267	C	T	22.612	0.9799	0.0913	0.0192	2.06e-06	0.940674	-0.175636	0.0755148	0.0200263
56	Serotonin (5HT)	Crohn's disease of colon	rs988694	2	133627209	G	A	19.3067	0.523	0.0145	0.0033	8.39e-06	0.462271	0.0819697	0.0358169	0.022104
56	Serotonin (5HT)	Crohn's disease of colon	rs9953702	18	20550964	G	A	19.5739	0.6399	-0.0146	0.0033	9.22e-06	0.598553	-0.0183389	0.0364238	0.614622
57	Gamma-glutamylglutamine	Crohn's disease of colon	rs1751956	10	29581998	G	T	30.44	0.1353	-0.016	0.0029	2.35e-08	0.10673	-0.0345071	0.0579172	0.551308
57	Gamma-glutamylglutamine	Crohn's disease of colon	rs2657879	12	56865338	G	A	77.701	0.1738	-0.0238	0.0027	5.85e-19	0.181742	-0.0102203	0.0463252	0.825388
58	Gamma-glutamyltyrosine	Crohn's disease of colon	rs875740	16	16123048	A	C	32.1111	0.6656	0.0102	0.0018	6.34e-09	0.585262	-0.0203441	0.0361448	0.573538
58	Gamma-glutamyltyrosine	Crohn's disease of colon	rs956966	2	103587575	G	A	31.4846	0.5142	0.0101	0.0018	1.47e-08	0.521918	0.0124127	0.0358256	0.728986
59	Hypoxanthine	Crohn's disease of colon	rs6459467	6	16288192	A	G	65.2864	0.3888	0.0202	0.0025	1.93e-16	0.506981	-0.0303928	0.0357534	0.395288
60	Betaine	Crohn's disease of colon	rs16876394	5	78346769	C	T	79.9446	0.1007	-0.0304	0.0034	1.49e-19	0.0917136	0.0202001	0.0618349	0.743911
60	Betaine	Crohn's disease of colon	rs495360	12	327421	A	C	40.1111	0.497	-0.019	0.003	2.4e-10	0.529172	-0.0502543	0.0359827	0.162527
61	Xanthine	Crohn's disease of colon	rs11250123	8	11093364	A	G	25.9364	0.043	-0.0494	0.0097	3.83e-07	0.027748	-0.0194291	0.108564	0.857965
61	Xanthine	Crohn's disease of colon	rs4673167	2	227531180	G	A	22.7789	0.111	0.021	0.0044	1.7e-06	0.0518667	-0.151152	0.0809621	0.0619085
61	Xanthine	Crohn's disease of colon	rs4694292	4	71170524	T	C	19.9511	0.1089	0.0201	0.0045	6.44e-06	0.099617	0.0564219	0.060059	0.347504
62	Phosphate	Crohn's disease of colon	rs10404980	19	46758941	G	A	22.1734	0.0123	0.0744	0.0158	2.34e-06	0.00687018	0.0681673	0.220955	0.757693
62	Phosphate	Crohn's disease of colon	rs1466522	8	85520966	C	T	26.5621	0.2355	0.0067	0.0013	3.15e-07	0.304485	-0.0648885	0.0388843	0.0951656
62	Phosphate	Crohn's disease of colon	rs4641759	16	62526984	C	T	20.25	0.2479	0.0135	0.003	6.66e-06	0.35902	-0.0169839	0.0372298	0.648254
62	Phosphate	Crohn's disease of colon	rs6126354	20	50470585	T	C	21.3508	0.7906	-0.0134	0.0029	5.46e-06	0.548043	-0.0254217	0.0360948	0.481244
63	3-methoxytyrosine	Crohn's disease of colon	rs10012175	4	90332273	T	C	20.3548	0.1065	0.0194	0.0043	5.78e-06	0.127131	0.0501363	0.0537067	0.350552
63	3-methoxytyrosine	Crohn's disease of colon	rs10800623	1	199272807	A	G	20.4055	0.2767	-0.0262	0.0058	6.17e-06	0.391086	-0.0152015	0.0369013	0.680376
63	3-methoxytyrosine	Crohn's disease of colon	rs10963172	9	17636441	G	A	20.3655	0.0276	-0.0352	0.0078	6.99e-06	0.0600345	-0.0102521	0.075452	0.89192
63	3-methoxytyrosine	Crohn's disease of colon	rs11192702	10	83909020	A	G	19.6735	0.0456	-0.0275	0.0062	7.88e-06	0.0229121	0.0239969	0.11974	0.84116
63	3-methoxytyrosine	Crohn's disease of colon	rs11564710	11	2200329	C	A	23.8374	0.6114	-0.0166	0.0034	9.79e-07	0.631651	-0.0331672	0.0371168	0.371542
63	3-methoxytyrosine	Crohn's disease of colon	rs12131781	1	167050565	G	A	21.7778	0.2909	-0.0126	0.0027	2.59e-06	0.265147	0.00113351	0.0408425	0.977859
63	3-methoxytyrosine	Crohn's disease of colon	rs12815706	12	47715378	A	G	23.7344	0.2806	0.019	0.0039	9.1e-07	0.439268	-0.0303644	0.036438	0.404666
63	3-methoxytyrosine	Crohn's disease of colon	rs339707	3	42723827	T	G	29.8284	0.6768	-0.0142	0.0026	6.35e-08	0.725962	0.025883	0.0401403	0.519047
63	3-methoxytyrosine	Crohn's disease of colon	rs6442530	3	15555422	T	C	22.3471	0.3254	-0.026	0.0055	2.74e-06	0.257061	0.0412058	0.0408076	0.312612
63	3-methoxytyrosine	Crohn's disease of colon	rs6592988	7	52281433	C	T	22.7665	0.8561	-0.0167	0.0035	2.4e-06	0.903905	-0.000387421	0.0610715	0.994938
63	3-methoxytyrosine	Crohn's disease of colon	rs7253109	19	46084641	T	G	23.1139	0.3395	0.0125	0.0026	2.34e-06	0.376242	-0.0255366	0.0371455	0.491784
63	3-methoxytyrosine	Crohn's disease of colon	rs7908166	10	24328932	G	A	20.307	0.0276	0.0356	0.0079	7.68e-06	0.0188415	0.1562	0.131314	0.234235
63	3-methoxytyrosine	Crohn's disease of colon	rs9323203	14	51437977	C	A	19.1001	0.2669	0.0118	0.0027	9.5e-06	0.294011	0.0549904	0.039153	0.16017
64	Pelargonate (9:0)	Crohn's disease of colon	rs1938479	10	92297943	C	T	30.8642	0.3555	0.01	0.0018	1.78e-08	0.252253	-0.0361205	0.0410467	0.378867
65	Undecanoate (11:0)	Crohn's disease of colon	rs10435813	9	5533450	G	A	20.25	0.1933	-0.0081	0.0018	4.01e-06	0.195496	0.0105835	0.0451523	0.814678
65	Undecanoate (11:0)	Crohn's disease of colon	rs10520198	4	171949091	A	G	20.5806	0.0296	0.0186	0.0041	5.64e-06	0.0472807	0.0322899	0.0840637	0.700895
65	Undecanoate (11:0)	Crohn's disease of colon	rs1122530	9	87464352	G	A	27.2716	0.1481	0.0094	0.0018	1.49e-07	0.122948	0.033565	0.054362	0.536946
65	Undecanoate (11:0)	Crohn's disease of colon	rs12116440	1	33478877	T	C	24.2093	0.0144	-0.0679	0.0138	9.28e-07	0.00689811	0.0129351	0.223084	0.953762
65	Undecanoate (11:0)	Crohn's disease of colon	rs1216886	1	113736738	A	G	19.7531	0.858	-0.008	0.0018	6.88e-06	0.872591	-0.0673804	0.0536253	0.208934
65	Undecanoate (11:0)	Crohn's disease of colon	rs12826254	12	131257120	T	C	25.5586	0.1364	0.0091	0.0018	7.05e-07	0.139622	-0.0151538	0.0518142	0.769931
65	Undecanoate (11:0)	Crohn's disease of colon	rs1408276	6	121794466	A	C	20.9258	0.955	-0.043	0.0094	4.59e-06	0.968155	0.070072	0.102941	0.496063
65	Undecanoate (11:0)	Crohn's disease of colon	rs16883391	5	9697886	A	C	24.4152	0.1921	-0.0084	0.0017	1.2e-06	0.247686	-0.00435326	0.0414658	0.916388
65	Undecanoate (11:0)	Crohn's disease of colon	rs17031632	2	106344426	G	A	24.2647	0.0716	-0.0133	0.0027	5.69e-07	0.0983091	-0.0317316	0.0602417	0.598376
65	Undecanoate (11:0)	Crohn's disease of colon	rs17145331	7	21808198	C	T	25.5586	0.1475	0.0091	0.0018	3.58e-07	0.222367	0.0958466	0.0430824	0.0260994
65	Undecanoate (11:0)	Crohn's disease of colon	rs17233321	5	81017141	G	A	26.4922	0.0481	0.0175	0.0034	3.74e-07	0.0657398	-0.00656733	0.0728011	0.928121
65	Undecanoate (11:0)	Crohn's disease of colon	rs1864609	7	136926419	C	A	25.5586	0.1394	0.0091	0.0018	3.26e-07	0.19515	0.0405655	0.0450762	0.368157
65	Undecanoate (11:0)	Crohn's disease of colon	rs196885	8	24736887	T	C	22.8272	0.8501	-0.0086	0.0018	1.22e-06	0.812284	0.0765554	0.0457029	0.0939204
65	Undecanoate (11:0)	Crohn's disease of colon	rs2471075	5	38119094	A	G	23.9012	0.9318	-0.0176	0.0036	8.39e-07	0.938886	-0.0174872	0.0761174	0.818294
65	Undecanoate (11:0)	Crohn's disease of colon	rs6140831	20	9008889	C	A	30.9414	0.4516	-0.0089	0.0016	5.4e-08	0.345352	-0.0420337	0.037579	0.263336
65	Undecanoate (11:0)	Crohn's disease of colon	rs686321	13	52426096	T	C	23.2664	0.8232	0.0082	0.0017	2.14e-06	0.817042	0.0616635	0.0466582	0.186301
65	Undecanoate (11:0)	Crohn's disease of colon	rs7069652	10	121964330	A	C	26.7958	0.1869	-0.0088	0.0017	4.03e-07	0.143528	0.0202522	0.0507498	0.689849
65	Undecanoate (11:0)	Crohn's disease of colon	rs7134822	12	16198974	A	G	21.9559	0.9597	-0.0164	0.0035	3.87e-06	0.945432	-0.0193544	0.0793866	0.807386
65	Undecanoate (11:0)	Crohn's disease of colon	rs7666900	4	140414333	C	T	24.4475	0.8582	-0.0089	0.0018	6.93e-07	0.896653	-0.092359	0.0589161	0.116966
67	Taurodeoxycholate	Crohn's disease of colon	rs10975331	9	5877594	T	C	19.5798	0.0361	0.1208	0.0273	9.6e-06	0.0587107	-0.0908736	0.0760109	0.231879
67	Taurodeoxycholate	Crohn's disease of colon	rs1153699	2	175922786	T	G	21.444	0.2385	0.0602	0.013	3.89e-06	0.237683	0.0143227	0.0424206	0.735638
67	Taurodeoxycholate	Crohn's disease of colon	rs11949031	5	2370336	A	G	23.0122	0.1629	0.0662	0.0138	1.52e-06	0.141699	0.0376843	0.0524149	0.472164
67	Taurodeoxycholate	Crohn's disease of colon	rs17403795	11	10581217	A	G	20.5586	0.1166	0.073	0.0161	5.61e-06	0.140661	0.0163933	0.0513238	0.749416
67	Taurodeoxycholate	Crohn's disease of colon	rs1898906	2	188892386	A	G	21.2401	0.0296	0.1378	0.0299	4.09e-06	0.00766638	-0.0450055	0.205069	0.826288
67	Taurodeoxycholate	Crohn's disease of colon	rs4632709	4	159246141	C	T	25.6438	0.05	0.1504	0.0297	4e-07	0.041963	0.0791632	0.0890717	0.374133
67	Taurodeoxycholate	Crohn's disease of colon	rs4896370	6	138818837	G	A	21.0385	0.6458	-0.0555	0.0121	4.19e-06	0.653234	-0.0167995	0.0378591	0.657232
67	Taurodeoxycholate	Crohn's disease of colon	rs7184864	16	50188783	A	G	19.8059	0.8047	-0.0583	0.0131	9.14e-06	0.903241	-0.0456518	0.0604058	0.449798
67	Taurodeoxycholate	Crohn's disease of colon	rs7961079	12	109123064	G	A	23.3759	0.3759	-0.0527	0.0109	1.46e-06	0.324538	-0.066749	0.0382543	0.0810065
67	Taurodeoxycholate	Crohn's disease of colon	rs8137495	22	23972409	G	A	19.885	0.2607	-0.0602	0.0135	7.8e-06	0.240869	0.021043	0.0418499	0.61509
68	Glycerol	Crohn's disease of colon	rs10036528	5	110052401	A	G	23.6241	0.0757	-0.0209	0.0043	9.58e-07	0.123391	-0.0378777	0.054484	0.486925
68	Glycerol	Crohn's disease of colon	rs10216545	8	68776627	A	G	20.7316	0.4694	-0.0214	0.0047	5.19e-06	0.425688	0.0276924	0.0361537	0.443699
68	Glycerol	Crohn's disease of colon	rs10839972	11	8076174	G	T	20.0837	0.8128	-0.0121	0.0027	7.91e-06	0.794842	-0.0171175	0.0443954	0.699816
68	Glycerol	Crohn's disease of colon	rs12337470	9	8097415	C	T	20.7531	0.1676	0.0123	0.0027	5.9e-06	0.143948	-0.00835203	0.0507256	0.869219
68	Glycerol	Crohn's disease of colon	rs13216754	6	44653210	A	G	27.9388	0.0117	0.0555	0.0105	1.31e-07	0.0141692	-0.065308	0.15148	0.666371
68	Glycerol	Crohn's disease of colon	rs1614303	10	123396806	T	G	26.1235	0.8159	0.0138	0.0027	2.4e-07	0.836221	-0.0204789	0.0483095	0.671631
68	Glycerol	Crohn's disease of colon	rs2259038	2	204313822	A	G	20.25	0.203	-0.0216	0.0048	7.51e-06	0.0308569	-0.0399465	0.103418	0.699302
68	Glycerol	Crohn's disease of colon	rs2501242	13	70576428	T	G	27.3609	0.223	-0.0136	0.0026	1.84e-07	0.28232	-0.0562485	0.0398304	0.157891
68	Glycerol	Crohn's disease of colon	rs2941840	18	76526710	A	G	21.1984	0.0691	0.0221	0.0048	3.71e-06	0.113634	0.0604983	0.0564047	0.283462
68	Glycerol	Crohn's disease of colon	rs5022234	13	82053416	C	A	22.11	0.3697	-0.0221	0.0047	2.15e-06	0.38692	-0.0306492	0.0368344	0.405363
68	Glycerol	Crohn's disease of colon	rs5759809	22	23786770	T	C	21.16	0.011	0.069	0.015	4.23e-06	0.116075	0.0355757	0.0560598	0.525688
68	Glycerol	Crohn's disease of colon	rs641939	2	72611175	G	A	22.1248	0.2013	-0.0127	0.0027	2.13e-06	0.179681	-0.102466	0.0466017	0.0278946
68	Glycerol	Crohn's disease of colon	rs9374302	6	112240332	A	G	27.2716	0.1744	-0.0141	0.0027	1.72e-07	0.135949	-0.140524	0.0536063	0.00875649
68	Glycerol	Crohn's disease of colon	rs9878149	3	14402491	G	A	20.25	0.7326	-0.0117	0.0026	5.48e-06	0.769085	-0.0663072	0.042449	0.118277
69	Kynurenine	Crohn's disease of colon	rs10085935	8	39806267	T	C	36.7093	0.3782	-0.0103	0.0017	3.33e-09	0.362668	0.00958525	0.037092	0.796084
69	Kynurenine	Crohn's disease of colon	rs3184504	12	111884608	C	T	76.8201	0.5149	-0.0149	0.0017	6.05e-18	0.592038	-0.0608919	0.0363577	0.0939745
69	Kynurenine	Crohn's disease of colon	rs8051149	16	87878822	A	G	106.502	0.2127	0.0258	0.0025	9.07e-26	0.228532	0.059503	0.0424884	0.161377
70	Mannitol	Crohn's disease of colon	rs10017961	4	141000337	A	G	20.6303	0.2731	0.0486	0.0107	5.62e-06	0.28133	0.0111457	0.040102	0.781063
70	Mannitol	Crohn's disease of colon	rs11487092	7	107693740	A	G	21.8953	0.012	0.248	0.053	2.88e-06	0.00199035	0.246358	0.399365	0.537318
70	Mannitol	Crohn's disease of colon	rs16967757	16	64636513	T	C	23.096	0.3037	0.0495	0.0103	1.43e-06	0.284067	0.0164295	0.0394703	0.677228
70	Mannitol	Crohn's disease of colon	rs1998053	14	101320034	G	A	20.734	0.9145	-0.0724	0.0159	5.6e-06	0.874606	-0.0631388	0.0540389	0.242648
70	Mannitol	Crohn's disease of colon	rs4404993	9	19367826	T	G	21.6877	0.1848	0.0964	0.0207	3.21e-06	0.229145	-0.0470544	0.0426321	0.269709
70	Mannitol	Crohn's disease of colon	rs488225	12	3229827	G	A	20.8544	0.6098	0.0411	0.009	4.87e-06	0.62903	0.0675501	0.0370381	0.068182
70	Mannitol	Crohn's disease of colon	rs4917405	10	105638232	C	T	20.4388	0.9563	-0.0972	0.0215	6.28e-06	0.944797	-0.0218873	0.0780107	0.779042
70	Mannitol	Crohn's disease of colon	rs6434811	2	196866420	T	C	21.5758	0.9256	-0.0785	0.0169	3.52e-06	0.892975	0.147416	0.0576695	0.0105813
70	Mannitol	Crohn's disease of colon	rs6657899	1	86703902	T	G	19.9665	0.0322	0.1908	0.0427	7.96e-06	0.0123611	-0.0914638	0.163552	0.576003
70	Mannitol	Crohn's disease of colon	rs7184992	16	27432010	T	C	23.3515	0.3003	0.0807	0.0167	1.31e-06	0.322064	-0.0226016	0.0383779	0.555913
70	Mannitol	Crohn's disease of colon	rs7240261	18	5428938	T	C	20.1074	0.562	0.0565	0.0126	7.52e-06	0.534003	0.0493103	0.0359442	0.170108
71	Glycerol 3-phosphate (G3P)	Crohn's disease of colon	rs11020587	11	93643089	A	G	20.4756	0.9798	-0.0362	0.008	7.02e-06	0.971185	-0.0510797	0.10593	0.629663
71	Glycerol 3-phosphate (G3P)	Crohn's disease of colon	rs11062138	12	2280942	A	G	23.5405	0.1724	0.0131	0.0027	1.46e-06	0.220624	-0.040282	0.0432578	0.351746
71	Glycerol 3-phosphate (G3P)	Crohn's disease of colon	rs13120638	4	186537472	G	T	21.2944	0.0787	-0.0443	0.0096	3.96e-06	0.0729293	0.0959963	0.0687891	0.16286
71	Glycerol 3-phosphate (G3P)	Crohn's disease of colon	rs1813982	15	37794229	T	C	20.417	0.2209	-0.0122	0.0027	6.59e-06	0.196042	0.0293379	0.0450329	0.514739
71	Glycerol 3-phosphate (G3P)	Crohn's disease of colon	rs2517897	6	29800101	A	C	23.8702	0.1141	0.0171	0.0035	1.23e-06	0.150101	0.00909289	0.0500741	0.855906
71	Glycerol 3-phosphate (G3P)	Crohn's disease of colon	rs333383	4	173248027	G	A	22.1248	0.1616	0.0127	0.0027	3.38e-06	0.15099	0.059979	0.0501943	0.232112
71	Glycerol 3-phosphate (G3P)	Crohn's disease of colon	rs4075155	8	57194617	C	T	19.7531	0.2039	0.012	0.0027	8.88e-06	0.295071	-0.0272529	0.0391171	0.48599
71	Glycerol 3-phosphate (G3P)	Crohn's disease of colon	rs7867387	9	82116941	G	A	21.5193	0.0949	-0.0167	0.0036	4.16e-06	0.0453302	-0.0337401	0.0852277	0.692193
71	Glycerol 3-phosphate (G3P)	Crohn's disease of colon	rs874758	10	88100089	G	A	22.9031	0.8145	0.0134	0.0028	1.43e-06	0.814325	0.100832	0.0460657	0.0286068
73	Carnitine	Crohn's disease of colon	rs10821585	10	61516587	A	G	91.3086	0.4124	-0.0086	0.0009	1.28e-21	0.449634	-0.071612	0.0359381	0.0462999
73	Carnitine	Crohn's disease of colon	rs11183620	12	47212370	G	A	30.8642	0.5324	-0.005	0.0009	3e-08	0.642078	-0.0206453	0.0376648	0.5836
73	Carnitine	Crohn's disease of colon	rs11620955	14	65491255	G	A	32.1111	0.5233	0.0051	0.0009	1.63e-08	0.584473	0.0617145	0.0362096	0.0883121
73	Carnitine	Crohn's disease of colon	rs11620973	14	96018052	G	A	32.1111	0.3674	0.0051	0.0009	2.35e-08	0.331075	0.045401	0.0379702	0.231814
73	Carnitine	Crohn's disease of colon	rs12356193	10	61413353	G	A	293.266	0.1638	-0.0274	0.0016	3.69e-63	0.0962838	-0.0801616	0.0607565	0.187038
73	Carnitine	Crohn's disease of colon	rs12709393	17	55292115	G	T	34.679	0.3714	-0.0053	0.0009	6.41e-09	0.378702	-0.0170497	0.0368373	0.64348
73	Carnitine	Crohn's disease of colon	rs1466788	1	110618730	G	A	67.6049	0.5932	0.0074	0.0009	3.05e-16	0.642447	-0.0218451	0.0373158	0.558272
73	Carnitine	Crohn's disease of colon	rs2114713	15	80528373	G	T	30.8642	0.42	0.005	0.0009	2.67e-08	0.448606	-0.0413165	0.0359714	0.250724
73	Carnitine	Crohn's disease of colon	rs2279014	2	219261176	T	C	30.8642	0.367	-0.005	0.0009	4.86e-08	0.328932	-0.0521911	0.0379793	0.16938
73	Carnitine	Crohn's disease of colon	rs2396004	6	43355851	G	A	29.642	0.5611	-0.0049	0.0009	4.31e-08	0.620251	-0.0421563	0.0367204	0.250954
73	Carnitine	Crohn's disease of colon	rs2492788	1	212844187	C	T	29.642	0.4543	-0.0049	0.0009	4.58e-08	0.509631	-0.0108371	0.0357119	0.76154
73	Carnitine	Crohn's disease of colon	rs3736438	17	45486651	G	T	40.1111	0.6111	0.0057	0.0009	3.19e-10	0.553781	-0.0540555	0.0359223	0.132377
73	Carnitine	Crohn's disease of colon	rs4860022	4	167693875	T	C	37.3457	0.3362	-0.0055	0.0009	9.6e-10	0.408112	0.0277942	0.036362	0.444643
73	Carnitine	Crohn's disease of colon	rs6862024	5	150428871	A	G	37.3457	0.3691	-0.0055	0.0009	8.99e-10	0.340396	-0.0125824	0.0376714	0.738377
73	Carnitine	Crohn's disease of colon	rs735315	2	51331157	C	T	36	0.5057	-0.0054	0.0009	1.87e-09	0.420233	0.0120709	0.0363019	0.739501
73	Carnitine	Crohn's disease of colon	rs9842133	3	179664102	C	T	50.5679	0.3351	-0.0064	0.0009	4.2e-12	0.403019	0.00250908	0.036479	0.945164
74	Choline	Crohn's disease of colon	rs10194073	2	38117987	C	A	21.7778	0.2082	0.007	0.0015	6.33e-06	0.228826	-0.0273704	0.0424406	0.518984
74	Choline	Crohn's disease of colon	rs11058334	12	126281125	A	G	21.3169	0.0228	-0.0217	0.0047	4.26e-06	0.0352999	-0.0135168	0.0969146	0.889077
74	Choline	Crohn's disease of colon	rs11656215	17	17453067	T	C	27.7378	0.498	-0.0079	0.0015	7.48e-08	0.487724	0.0239926	0.0358104	0.502865
74	Choline	Crohn's disease of colon	rs11930490	4	131803692	G	A	22.5625	0.197	0.0076	0.0016	1.52e-06	0.184851	-0.0317347	0.045983	0.490105
74	Choline	Crohn's disease of colon	rs17497383	1	83181649	T	G	21.3227	0.0722	0.0157	0.0034	5.34e-06	0.0485957	0.0969518	0.0828901	0.242145
74	Choline	Crohn's disease of colon	rs17642749	10	119647256	G	T	22.2245	0.0482	0.0165	0.0035	2.68e-06	0.0431408	0.0676292	0.0893326	0.44902
74	Choline	Crohn's disease of colon	rs2080224	7	19528604	A	G	21.7778	0.9304	-0.0112	0.0024	1.97e-06	0.917615	-0.0523359	0.0651984	0.422139
74	Choline	Crohn's disease of colon	rs2824226	21	18457828	G	A	21.3906	0.1814	-0.0074	0.0016	3.19e-06	0.200072	0.0130668	0.0449105	0.771088
74	Choline	Crohn's disease of colon	rs3786284	18	12010646	A	G	23.1602	0.1481	0.0077	0.0016	2.04e-06	0.165353	0.0250568	0.0482679	0.603678
74	Choline	Crohn's disease of colon	rs4487482	5	135201771	G	A	29.16	0.1961	-0.0081	0.0015	1.82e-07	0.205429	0.0565466	0.0441619	0.20039
74	Choline	Crohn's disease of colon	rs4538138	2	147285915	T	G	19.6914	0.1884	0.0071	0.0016	6.08e-06	0.230508	-0.0461167	0.0426325	0.279374
74	Choline	Crohn's disease of colon	rs7215931	17	30099125	A	G	24.3789	0.2013	0.0079	0.0016	1.29e-06	0.222315	-0.00349838	0.0430514	0.935235
74	Choline	Crohn's disease of colon	rs7687295	4	182067936	A	G	21.0402	0.0249	0.0211	0.0046	4.32e-06	0.0643088	0.102066	0.0728747	0.161343
74	Choline	Crohn's disease of colon	rs8033100	15	71977446	C	T	26.9102	0.1435	0.0083	0.0016	4.94e-07	0.122278	0.0852611	0.0545347	0.117952
74	Choline	Crohn's disease of colon	rs9321388	6	133384863	A	G	20.25	0.1772	-0.0072	0.0016	7.58e-06	0.181291	0.0296975	0.0464732	0.522808
74	Choline	Crohn's disease of colon	rs9663814	10	77738382	A	G	24.2908	0.6163	0.0069	0.0014	1.1e-06	0.64016	0.0329271	0.0372598	0.37685
75	N-acetylornithine	Crohn's disease of colon	rs7573275	2	73552542	A	G	1294.29	0.2739	-0.1511	0.0042	1e-200	0.262736	-0.0161263	0.0406055	0.691259
76	N1-methyladenosine	Crohn's disease of colon	rs315988	6	160660694	C	T	30.6746	0.7633	-0.0072	0.0013	1.08e-08	0.824044	-0.00217216	0.0469426	0.963093
77	3-methyl-2-oxovalerate	Crohn's disease of colon	rs11084396	19	55865527	T	C	30.25	0.544	-0.011	0.002	3.8e-08	0.60057	0.0147299	0.0366177	0.687491
77	3-methyl-2-oxovalerate	Crohn's disease of colon	rs1440581	4	89226422	C	T	67.8201	0.5414	0.014	0.0017	1.21e-16	0.490348	0.0390804	0.0362269	0.280691
78	3-methylhistidine	Crohn's disease of colon	rs11174282	12	62408708	T	C	20.1516	0.0957	-0.0615	0.0137	6.88e-06	0.133852	-0.0598525	0.0524907	0.254182
78	3-methylhistidine	Crohn's disease of colon	rs17241253	8	129890188	C	T	20.208	0.1883	-0.0481	0.0107	7.07e-06	0.110525	0.0322064	0.0570543	0.572423
78	3-methylhistidine	Crohn's disease of colon	rs2126638	9	22962118	A	G	25.0614	0.9266	0.0816	0.0163	5.78e-07	0.942154	-0.00349168	0.0765397	0.963614
78	3-methylhistidine	Crohn's disease of colon	rs2969612	4	127646765	C	T	21.0919	0.8417	0.0496	0.0108	4.75e-06	0.895458	-0.052569	0.0581734	0.366175
78	3-methylhistidine	Crohn's disease of colon	rs3783141	13	26548030	C	T	19.9988	0.1292	-0.0559	0.0125	7.75e-06	0.141651	-0.0581522	0.0512374	0.256393
78	3-methylhistidine	Crohn's disease of colon	rs8048366	16	84975260	A	G	19.5968	0.4796	-0.0363	0.0082	9.74e-06	0.400311	0.0320127	0.0364446	0.37973
78	3-methylhistidine	Crohn's disease of colon	rs9915627	17	13675618	A	C	21.1297	0.1829	0.1117	0.0243	4.29e-06	0.187012	0.0124231	0.0481901	0.796567
79	3-phenylpropionate (hydrocinnamate)	Crohn's disease of colon	rs11647589	16	20449616	G	A	45.3378	0.2849	-0.0303	0.0045	2.85e-11	0.294	0.0500128	0.0391713	0.201683
80	Phenylacetate	Crohn's disease of colon	rs10520388	4	178803314	T	G	20.8164	0.1733	0.0219	0.0048	4.92e-06	0.108491	0.0814324	0.0575534	0.157097
80	Phenylacetate	Crohn's disease of colon	rs16885269	5	55651822	T	C	20.0139	0.1333	0.0255	0.0057	8.07e-06	0.127555	-0.0109031	0.0536631	0.838997
80	Phenylacetate	Crohn's disease of colon	rs17683199	18	35238850	A	G	22.512	0.0385	-0.0446	0.0094	1.88e-06	0.0291097	0.174005	0.105692	0.0996919
80	Phenylacetate	Crohn's disease of colon	rs201060	6	6727398	G	A	19.5513	0.0535	-0.0367	0.0083	9.75e-06	0.0390086	0.00311004	0.0927305	0.973245
80	Phenylacetate	Crohn's disease of colon	rs2133896	12	99848900	T	G	22.4427	0.0416	0.0469	0.0099	2.36e-06	0.0347022	-0.0837113	0.0975129	0.390636
80	Phenylacetate	Crohn's disease of colon	rs2345834	2	18565167	T	C	20.3655	0.6652	0.0176	0.0039	5.45e-06	0.647466	-0.0104066	0.0374456	0.781079
80	Phenylacetate	Crohn's disease of colon	rs2579931	6	101854633	A	G	20.7874	0.1044	0.0269	0.0059	4.23e-06	0.0605641	0.00493713	0.0756967	0.947997
80	Phenylacetate	Crohn's disease of colon	rs4296931	6	3211615	G	A	20.7925	0.9756	-0.1523	0.0334	5.09e-06	0.937194	-0.131171	0.0742533	0.0773072
81	Glycerophosphorylcholine (GPC)	Crohn's disease of colon	rs1076302	8	1461822	A	G	20.25	0.201	0.018	0.004	6.8e-06	0.217986	0.0125364	0.0432729	0.772042
81	Glycerophosphorylcholine (GPC)	Crohn's disease of colon	rs11025430	11	20213955	G	A	20.5976	0.5769	0.0118	0.0026	8.33e-06	0.581495	0.00737196	0.0362386	0.8388
81	Glycerophosphorylcholine (GPC)	Crohn's disease of colon	rs1379617	4	83952862	C	T	19.8661	0.2153	0.0156	0.0035	6.15e-06	0.206177	-0.0289535	0.0443688	0.514038
81	Glycerophosphorylcholine (GPC)	Crohn's disease of colon	rs16876953	5	6142003	A	G	19.9053	0.0818	0.0232	0.0052	8.69e-06	0.101212	0.0654712	0.0591833	0.268621
81	Glycerophosphorylcholine (GPC)	Crohn's disease of colon	rs170555	1	210241616	C	T	21.16	0.4393	0.0253	0.0055	3.84e-06	0.499955	-0.0448201	0.0357434	0.209863
81	Glycerophosphorylcholine (GPC)	Crohn's disease of colon	rs17312926	12	12647902	A	G	23.5078	0.3493	0.016	0.0033	1.42e-06	0.421032	-0.00565564	0.0362758	0.876106
81	Glycerophosphorylcholine (GPC)	Crohn's disease of colon	rs1923140	1	34337704	A	G	23.5405	0.5322	0.0131	0.0027	8.57e-07	0.479932	0.0377586	0.03566	0.289668
81	Glycerophosphorylcholine (GPC)	Crohn's disease of colon	rs1978450	5	155980730	A	C	20.8576	0.017	0.1329	0.0291	4.75e-06	0.127085	-0.110246	0.0536919	0.0400433
81	Glycerophosphorylcholine (GPC)	Crohn's disease of colon	rs2834399	21	35549478	G	T	21.0919	0.5296	-0.0124	0.0027	3.23e-06	0.546546	-0.0246594	0.036135	0.494971
81	Glycerophosphorylcholine (GPC)	Crohn's disease of colon	rs309293	2	7189354	C	T	20.1711	0.5685	-0.0256	0.0057	6.9e-06	0.660797	-0.0443375	0.0377592	0.240308
81	Glycerophosphorylcholine (GPC)	Crohn's disease of colon	rs633114	10	129621112	T	C	21.2158	0.3884	-0.0152	0.0033	3.91e-06	0.416943	0.0524299	0.0363855	0.149598
81	Glycerophosphorylcholine (GPC)	Crohn's disease of colon	rs7260033	19	35136617	T	C	20.25	0.4757	-0.0117	0.0026	8.79e-06	0.444394	-0.0290144	0.0358719	0.418611
81	Glycerophosphorylcholine (GPC)	Crohn's disease of colon	rs7711255	5	141113274	G	A	25.8901	0.2032	0.0173	0.0034	4.92e-07	0.21063	-0.0768077	0.0437876	0.0794145
81	Glycerophosphorylcholine (GPC)	Crohn's disease of colon	rs7738342	6	75411006	A	G	19.1094	0.2185	-0.0153	0.0035	9.17e-06	0.250233	0.0559469	0.0411738	0.174211
81	Glycerophosphorylcholine (GPC)	Crohn's disease of colon	rs7788421	7	156577354	G	A	20.5847	0.0866	0.0245	0.0054	5.18e-06	0.0238651	0.0727251	0.116946	0.534029
81	Glycerophosphorylcholine (GPC)	Crohn's disease of colon	rs7795076	7	49145008	C	T	23.5918	0.1834	0.017	0.0035	1.62e-06	0.158267	0.0467914	0.0489462	0.339085
82	Aspartate	Crohn's disease of colon	rs12954899	18	39582087	G	A	19.8572	0.1095	0.0254	0.0057	8.84e-06	0.13752	-0.0340242	0.0518536	0.511722
82	Aspartate	Crohn's disease of colon	rs4690523	4	178361162	C	T	24.1958	0.4757	-0.0182	0.0037	1.04e-06	0.493152	-0.0161909	0.0357836	0.650933
82	Aspartate	Crohn's disease of colon	rs7150776	14	93113821	T	C	23.9584	0.1105	0.0279	0.0057	9.22e-07	0.118962	0.0137988	0.0552093	0.802637
83	X-04499--3,4-dihydroxybutyrate	Crohn's disease of colon	rs1030420	8	67360725	T	C	47.6963	0.1884	-0.0221	0.0032	1.02e-11	0.164068	-0.0412111	0.0481943	0.392494
84	Dihomo-linoleate (20:2n6)	Crohn's disease of colon	rs1027175	3	176450118	A	G	19.5364	0.8735	0.0221	0.005	9.56e-06	0.914003	-0.116334	0.0639939	0.0690796
84	Dihomo-linoleate (20:2n6)	Crohn's disease of colon	rs1348656	3	144933520	T	C	23.1315	0.798	-0.0202	0.0042	1.52e-06	0.815277	-0.0589291	0.0458877	0.199071
84	Dihomo-linoleate (20:2n6)	Crohn's disease of colon	rs1477025	16	49811433	C	T	23.2664	0.3453	-0.0164	0.0034	2.01e-06	0.393029	0.0416034	0.0366538	0.25636
84	Dihomo-linoleate (20:2n6)	Crohn's disease of colon	rs16839086	2	207915849	A	C	19.7664	0.2302	0.0329	0.0074	8.81e-06	0.279606	0.0716605	0.0397808	0.0716424
84	Dihomo-linoleate (20:2n6)	Crohn's disease of colon	rs1709851	2	240323661	A	C	19.6122	0.6588	-0.0155	0.0035	7.62e-06	0.678074	-0.0369118	0.0383608	0.335936
84	Dihomo-linoleate (20:2n6)	Crohn's disease of colon	rs3793900	10	88718833	A	C	20.5156	0.6359	-0.0154	0.0034	7.41e-06	0.712916	-0.0314111	0.0396638	0.428399
84	Dihomo-linoleate (20:2n6)	Crohn's disease of colon	rs6557244	6	153243958	T	C	20.3172	0.9101	0.0302	0.0067	7.32e-06	0.963614	-0.117759	0.0963743	0.221748
84	Dihomo-linoleate (20:2n6)	Crohn's disease of colon	rs6738713	2	49727334	C	T	21.7778	0.0705	0.0308	0.0066	3.38e-06	0.0494141	0.0959362	0.0829629	0.247528
84	Dihomo-linoleate (20:2n6)	Crohn's disease of colon	rs9560579	13	90861688	G	A	20.25	0.4807	0.0153	0.0034	6.41e-06	0.559848	0.0596139	0.0361648	0.0992727
85	2-hydroxystearate	Crohn's disease of colon	rs10443953	10	57431680	A	G	22.8272	0.382	0.0086	0.0018	2.6e-06	0.382689	0.00309385	0.0367583	0.932923
85	2-hydroxystearate	Crohn's disease of colon	rs10841406	12	20073094	A	G	23.3611	0.3963	-0.0087	0.0018	2.27e-06	0.28898	0.0243414	0.0395298	0.538044
85	2-hydroxystearate	Crohn's disease of colon	rs10892951	11	122893334	A	G	23.9012	0.4059	-0.0088	0.0018	1.66e-06	0.347491	-0.0877325	0.0375802	0.0195673
85	2-hydroxystearate	Crohn's disease of colon	rs11150606	16	31099011	C	T	26.449	0.011	0.072	0.014	2.71e-07	0.0726434	-0.0389174	0.0687679	0.571446
85	2-hydroxystearate	Crohn's disease of colon	rs11210537	1	42345723	A	G	20.0139	0.3117	0.0085	0.0019	4.96e-06	0.315836	-0.00290414	0.0385159	0.939896
85	2-hydroxystearate	Crohn's disease of colon	rs12208243	6	146855018	G	A	19.8277	0.0484	-0.0236	0.0053	8.25e-06	0.0722037	-0.0999499	0.0700229	0.153468
85	2-hydroxystearate	Crohn's disease of colon	rs12639715	4	174845814	C	T	20.0139	0.3351	-0.0085	0.0019	4.18e-06	0.302678	-0.0342772	0.0389491	0.378831
85	2-hydroxystearate	Crohn's disease of colon	rs12975371	19	53608068	G	A	20.25	0.4633	0.0081	0.0018	9.15e-06	0.43939	0.00787953	0.0359963	0.826729
85	2-hydroxystearate	Crohn's disease of colon	rs13238296	7	90278864	C	T	19.0831	0.3467	-0.0083	0.0019	8.37e-06	0.322207	0.0195603	0.0382761	0.609329
85	2-hydroxystearate	Crohn's disease of colon	rs16909189	8	139478670	T	C	23.2538	0.0502	0.0217	0.0045	1.39e-06	0.0639109	-0.0192056	0.0731842	0.792991
85	2-hydroxystearate	Crohn's disease of colon	rs1799977	3	37053568	G	A	20.4875	0.3252	-0.0086	0.0019	3.91e-06	0.297942	-0.0373554	0.0389704	0.337781
85	2-hydroxystearate	Crohn's disease of colon	rs2272588	14	78023714	G	A	22.2994	0.4907	-0.0085	0.0018	4.18e-06	0.500569	0.00885203	0.035859	0.805019
85	2-hydroxystearate	Crohn's disease of colon	rs2555231	3	37612926	T	C	27.2716	0.6247	-0.0094	0.0018	3.22e-07	0.618469	-0.0266158	0.0367876	0.469372
85	2-hydroxystearate	Crohn's disease of colon	rs2589314	13	43732704	A	G	21.2623	0.5476	-0.0083	0.0018	6.42e-06	0.470343	0.0292863	0.0358251	0.413653
85	2-hydroxystearate	Crohn's disease of colon	rs2745001	16	1517728	G	A	20.25	0.6024	0.0081	0.0018	9.25e-06	0.560756	0.0111327	0.0358977	0.756467
85	2-hydroxystearate	Crohn's disease of colon	rs2946398	4	23911002	C	T	21.2623	0.6213	0.0083	0.0018	7.64e-06	0.60222	-0.00163619	0.0366332	0.964375
85	2-hydroxystearate	Crohn's disease of colon	rs3796622	4	983060	C	T	21.9418	0.6253	0.0089	0.0019	1.35e-06	0.729169	-0.0683261	0.0402162	0.0893244
85	2-hydroxystearate	Crohn's disease of colon	rs3822742	5	139059017	A	C	24.01	0.363	-0.0098	0.002	8.48e-07	0.326879	-0.0484135	0.038169	0.204656
85	2-hydroxystearate	Crohn's disease of colon	rs6033014	20	11015459	C	T	23.3611	0.6312	0.0087	0.0018	2.6e-06	0.633697	0.0106215	0.0379181	0.779389
85	2-hydroxystearate	Crohn's disease of colon	rs629487	12	53023068	G	T	23.3611	0.4303	0.0087	0.0018	2.21e-06	0.403293	-0.0531905	0.0364347	0.144321
85	2-hydroxystearate	Crohn's disease of colon	rs6462013	7	27433771	G	A	20.7531	0.4884	0.0082	0.0018	7.14e-06	0.487653	0.0486247	0.0357487	0.173772
85	2-hydroxystearate	Crohn's disease of colon	rs6564154	16	74685589	T	C	25.5291	0.6689	0.0096	0.0019	2.57e-07	0.655235	0.00168567	0.0374936	0.96414
85	2-hydroxystearate	Crohn's disease of colon	rs6905811	6	104209117	T	C	25	0.343	0.009	0.0018	1.01e-06	0.342626	-0.00451517	0.0375977	0.904411
85	2-hydroxystearate	Crohn's disease of colon	rs697635	12	52282748	A	G	19.5457	0.3292	0.0084	0.0019	5.15e-06	0.358848	0.0255906	0.0373504	0.493249
85	2-hydroxystearate	Crohn's disease of colon	rs7283743	21	43203188	T	C	20.898	0.1245	-0.0128	0.0028	5.01e-06	0.0906372	0.0372914	0.0626253	0.551531
85	2-hydroxystearate	Crohn's disease of colon	rs7322113	13	26842207	C	T	21.367	0.0111	0.0453	0.0098	3.65e-06	0.00432432	0.216054	0.275794	0.4334
85	2-hydroxystearate	Crohn's disease of colon	rs757202	7	25276424	C	T	25	0.4904	0.009	0.0018	8.35e-07	0.511779	0.0515706	0.0357473	0.149121
85	2-hydroxystearate	Crohn's disease of colon	rs7652277	3	110943474	T	G	20.7531	0.4645	0.0082	0.0018	8e-06	0.455624	0.00952685	0.0358041	0.790176
85	2-hydroxystearate	Crohn's disease of colon	rs913416	9	14464744	T	C	20.7531	0.5313	-0.0082	0.0018	7.52e-06	0.567028	-0.0332428	0.0360941	0.357048
85	2-hydroxystearate	Crohn's disease of colon	rs9302365	15	93796278	A	C	25.5291	0.4684	-0.0096	0.0019	2.18e-07	0.447221	0.00363327	0.0360237	0.919663
85	2-hydroxystearate	Crohn's disease of colon	rs9715724	4	8641696	C	T	20.25	0.552	-0.009	0.002	6.8e-06	0.537458	0.0681697	0.036427	0.0612886
86	Indolelactate	Crohn's disease of colon	rs15676	9	131572027	A	G	50.0425	0.7123	0.0191	0.0027	1.33e-12	0.776905	0.0127152	0.0429864	0.767384
87	Glycylvaline	Crohn's disease of colon	rs17092360	14	57338592	G	A	22.0178	0.0904	0.0671	0.0143	2.61e-06	0.060669	0.114285	0.0752938	0.129052
87	Glycylvaline	Crohn's disease of colon	rs17498524	7	7951222	C	T	19.7323	0.2097	-0.0422	0.0095	9.65e-06	0.292124	0.0363519	0.0393647	0.355764
87	Glycylvaline	Crohn's disease of colon	rs1772858	1	201281850	A	G	20.1318	0.6211	-0.0341	0.0076	7.98e-06	0.658026	-0.0271972	0.0375839	0.469288
87	Glycylvaline	Crohn's disease of colon	rs3846242	4	161289069	T	C	19.8336	0.5792	0.0383	0.0086	8.04e-06	0.529892	-0.0197363	0.0358984	0.582469
87	Glycylvaline	Crohn's disease of colon	rs4905425	14	96537280	C	A	25.2674	0.4934	-0.0377	0.0075	5.72e-07	0.544051	-0.0179185	0.0359138	0.617827
87	Glycylvaline	Crohn's disease of colon	rs7697449	4	19898883	C	T	20.303	0.4364	-0.0383	0.0085	6.18e-06	0.397538	-0.0171599	0.036604	0.639215
88	Gamma-glutamylleucine	Crohn's disease of colon	rs10426971	19	22158167	A	G	19.9862	0.4387	0.0076	0.0017	8.18e-06	0.483216	-0.0470119	0.0357469	0.188466
88	Gamma-glutamylleucine	Crohn's disease of colon	rs11151740	18	69941882	G	A	19.5636	0.161	0.0115	0.0026	9.28e-06	0.283441	0.0174689	0.0397656	0.660446
88	Gamma-glutamylleucine	Crohn's disease of colon	rs12707434	7	138773301	G	A	24.6055	0.0361	0.0501	0.0101	7.66e-07	0.0313779	0.0082343	0.103881	0.936821
88	Gamma-glutamylleucine	Crohn's disease of colon	rs1292666	1	10908412	C	T	21.5952	0.5346	-0.0079	0.0017	2.74e-06	0.500886	0.0269369	0.0358282	0.452149
88	Gamma-glutamylleucine	Crohn's disease of colon	rs13188217	5	170016666	A	C	22.7024	0.4184	0.0081	0.0017	1.77e-06	0.395622	0.0408326	0.036472	0.262901
88	Gamma-glutamylleucine	Crohn's disease of colon	rs13189579	5	32609529	G	A	19.9373	0.0701	0.0192	0.0043	7.06e-06	0.0510813	-0.025072	0.0808621	0.756518
88	Gamma-glutamylleucine	Crohn's disease of colon	rs1382190	9	1818404	G	A	19.4181	0.0109	0.0401	0.0091	9.32e-06	0.0118763	0.0729338	0.165165	0.658793
88	Gamma-glutamylleucine	Crohn's disease of colon	rs17185878	8	13025438	G	A	23.8144	0.1485	0.0122	0.0025	8.68e-07	0.13045	-0.044149	0.0533061	0.407548
88	Gamma-glutamylleucine	Crohn's disease of colon	rs17652614	3	7371919	G	A	21.0519	0.4564	0.0078	0.0017	7.29e-06	0.444221	-0.0168012	0.0360862	0.641512
88	Gamma-glutamylleucine	Crohn's disease of colon	rs17794361	6	132765669	C	A	23.04	0.153	-0.024	0.005	1.59e-06	0.169947	0.0655507	0.0477139	0.169495
88	Gamma-glutamylleucine	Crohn's disease of colon	rs200449	1	6726401	A	G	20.25	0.569	0.009	0.002	6.8e-06	0.512922	0.0180103	0.0357209	0.614125
88	Gamma-glutamylleucine	Crohn's disease of colon	rs2043769	2	201344732	T	C	19.7136	0.8032	-0.0111	0.0025	8.72e-06	0.831649	-0.0366103	0.0479825	0.445467
88	Gamma-glutamylleucine	Crohn's disease of colon	rs2201453	1	80040353	G	A	23.2664	0.562	-0.0082	0.0017	1.14e-06	0.602457	0.0100716	0.0365961	0.783155
88	Gamma-glutamylleucine	Crohn's disease of colon	rs2203995	12	77866800	G	A	20.5156	0.3945	-0.0077	0.0017	7.26e-06	0.32392	-0.0242743	0.0381398	0.524479
88	Gamma-glutamylleucine	Crohn's disease of colon	rs2413113	22	32779227	C	T	19.9862	0.5333	0.0076	0.0017	5.74e-06	0.440714	-0.0423091	0.0359692	0.239491
88	Gamma-glutamylleucine	Crohn's disease of colon	rs2573124	16	87643917	A	C	23.2664	0.4579	-0.0082	0.0017	1.12e-06	0.505587	-0.0216914	0.0357317	0.543809
88	Gamma-glutamylleucine	Crohn's disease of colon	rs2819322	1	162281028	C	T	28.0277	0.5411	0.009	0.0017	1.5e-07	0.576178	0.0935133	0.0360647	0.00951612
88	Gamma-glutamylleucine	Crohn's disease of colon	rs3747115	22	24812377	C	T	21.5952	0.5046	-0.0079	0.0017	2.32e-06	0.502121	-0.0201908	0.0357099	0.571793
88	Gamma-glutamylleucine	Crohn's disease of colon	rs37959	7	8002389	T	C	20.5156	0.3919	0.0077	0.0017	8.94e-06	0.313722	0.0437521	0.0385073	0.255872
[truncated: 13,058 more rows]

## Sheet: 4
Supplementary Table 4. SNP information related to confounding factors
[truncated: 469 more rows]

## Sheet: 5
Supplementary Table 5. MR-Steiger test results for SNPs
[truncated: 13,699 more rows]

## Sheet: 6
Supplementary Table 6. Cochrane Q-test results for all batches
[truncated: 3,677 more rows]

[truncated: 2 more sheets: 7, 8]
